# Supplementary material
Source: publisher figshare collection journal article supplement (https://plos.figshare.com/articles/dataset/_/115291)
Supplement: Supplementary file 1 [file 1]

Archive with 22 entries (22 files):
- Figure_S1.pdf
- Figure_S2.pdf
- Figure_S3.pdf
- Figure_S4.pdf
- Figure_S5.pdf
- Figure_S6.pdf
- Figure_S7.pdf
- Figure_S8.pdf
- Figure_S9.pdf
- Table_S1.pdf
- Table_S2.pdf
- Table_S3.pdf
- Table_S4.pdf
- Table_S5.pdf
- Table_S6.pdf
- Table_S7.pdf
- Table_S8.pdf
- Table_S9.pdf
- Table_S10.pdf
- Table_S11.pdf
- Table_S12.pdf
- Table_S13.pdf
