# Supplementary material
Source: publisher figshare collection journal article supplement (https://plos.figshare.com/articles/dataset/_/115291)

**Figure S1** Length (A) and average quality score (B) distribution of total number of unfiltered and filtered high-quality Roche 454 reads generated for kabuli chickpea.

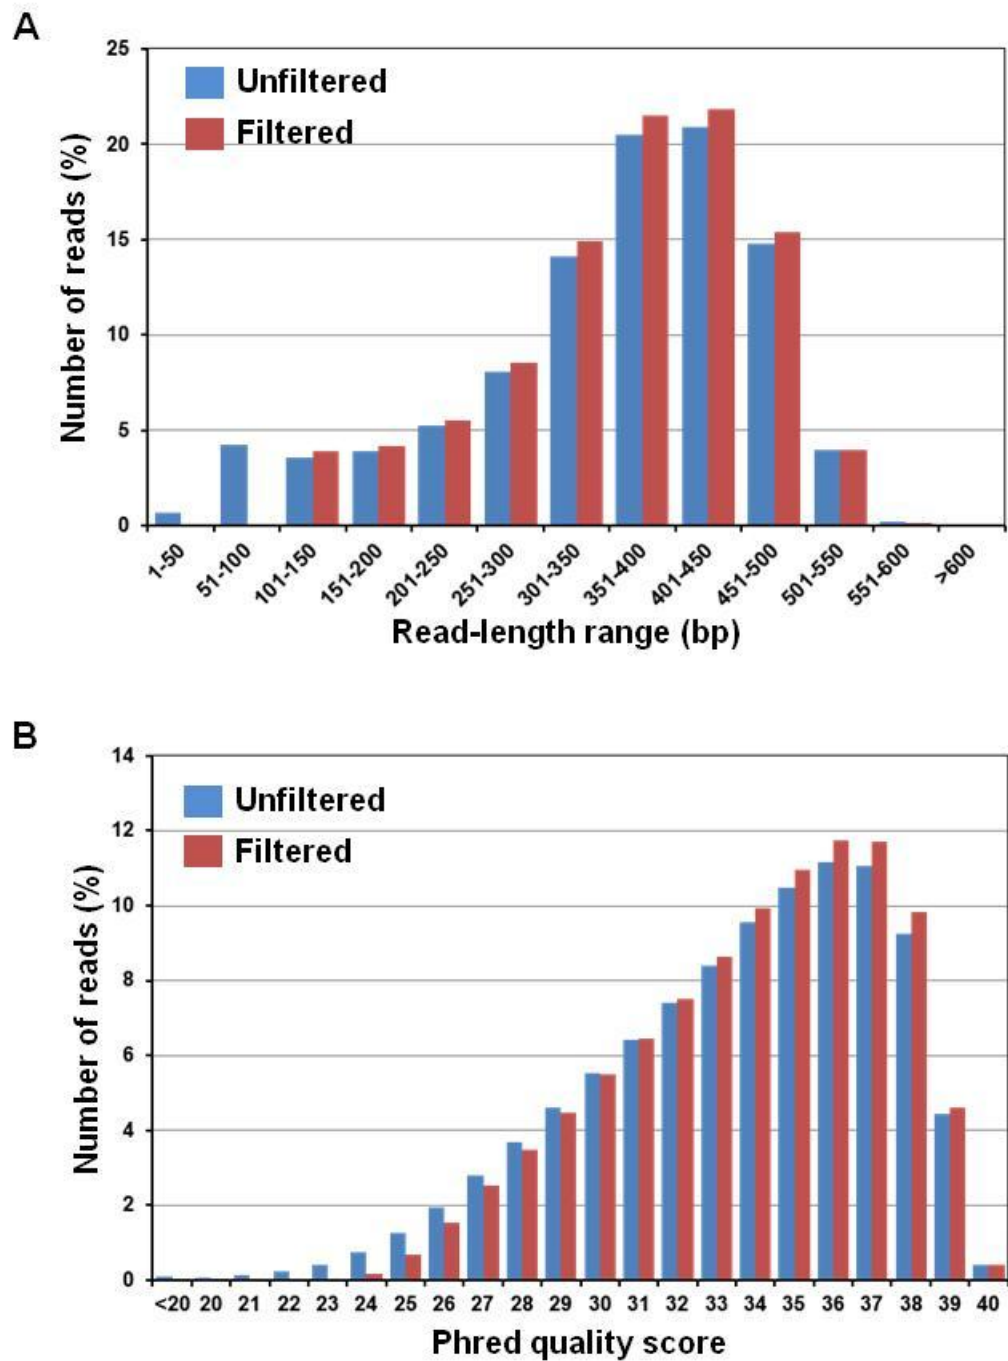

Supplement: Supplementary file 1 [file 1 › Figure_S1.pdf]
