# Supplementary material
Source: publisher figshare collection journal article supplement (https://plos.figshare.com/articles/dataset/_/115291)

**Figure S2.** Average quality score at each base position of total number of unfiltered and filtered high-quality Illumina reads generated for kabuli chickpea.

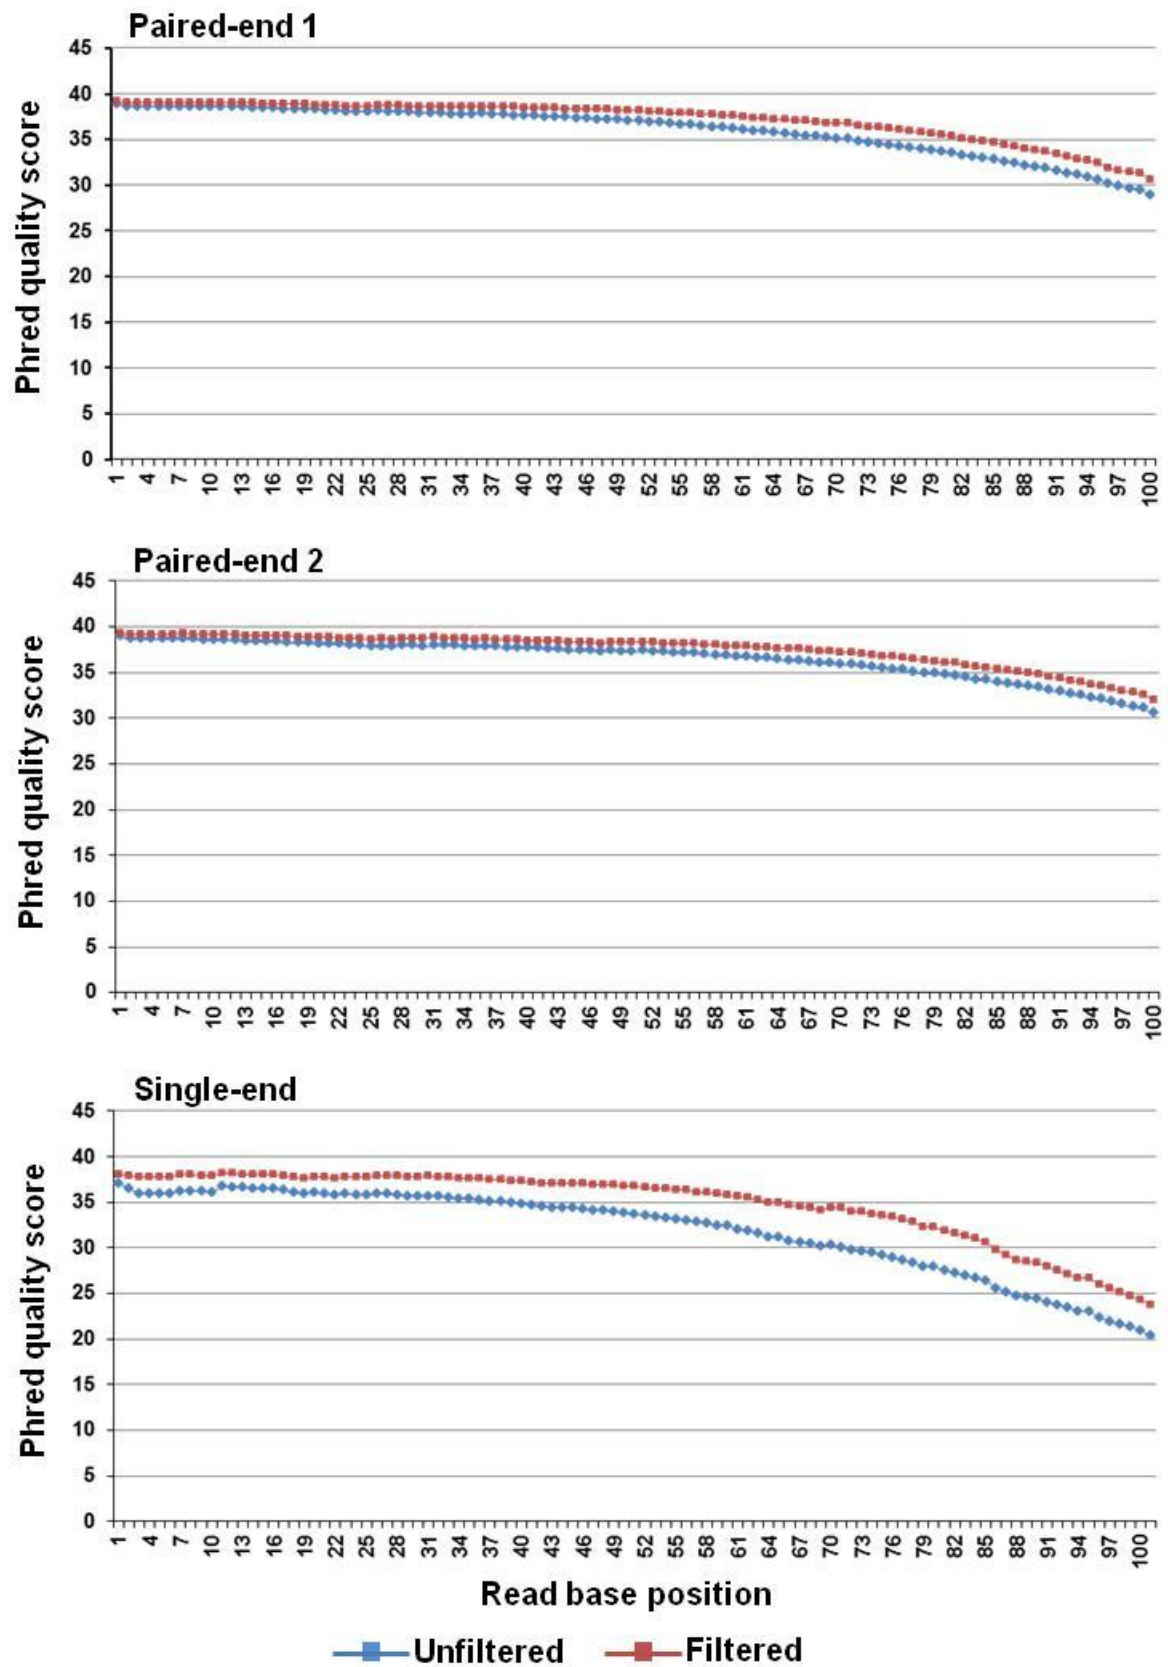

Supplement: Supplementary file 1 [file 1 › Figure_S2.pdf]
