# Supplementary material
Source: publisher figshare collection journal article supplement (https://plos.figshare.com/articles/dataset/_/115291)

**Figure S3.** Length distribution of transcripts generated from optimized assembly for kabuli chickpea.

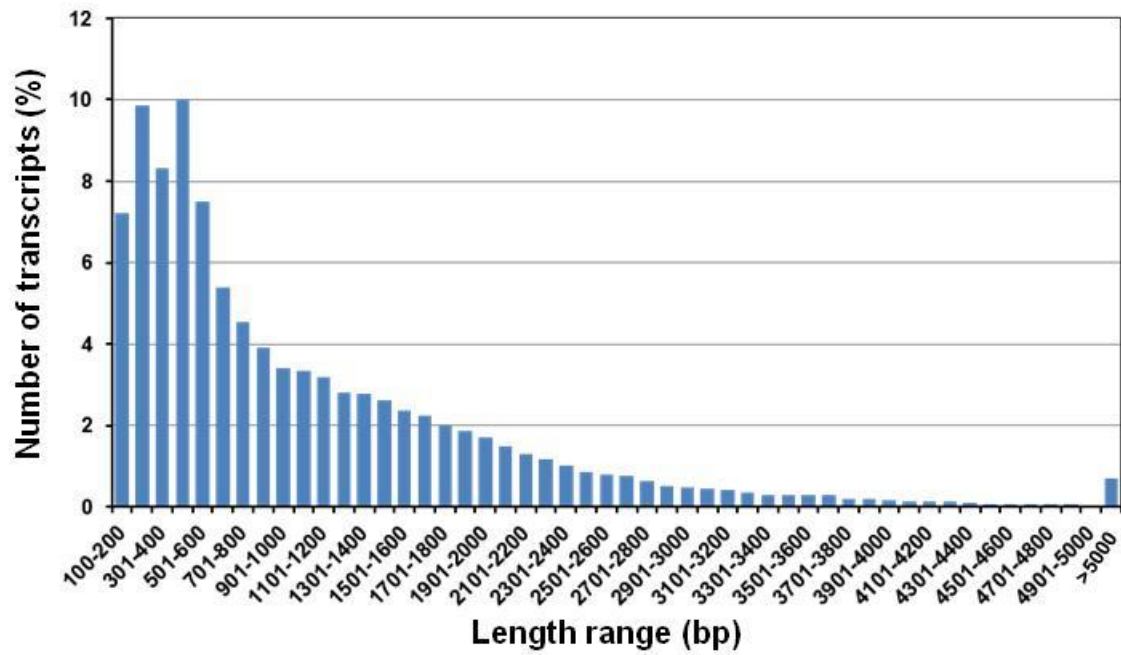

Supplement: Supplementary file 1 [file 1 › Figure_S3.pdf]
