# Supplementary material
Source: publisher figshare collection journal article supplement (https://plos.figshare.com/articles/dataset/_/115291)

**Figure S4.** GC content distribution in the transcripts from different chickpea genotypes. The average GC content of each transcript was calculated and percentage of transcripts with GC content within a range are represented.

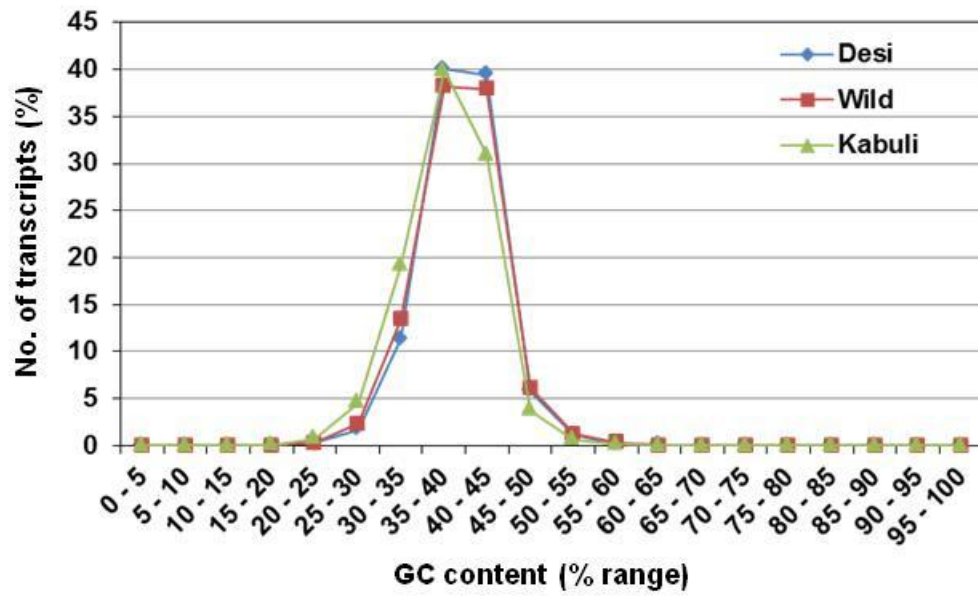

Supplement: Supplementary file 1 [file 1 › Figure_S4.pdf]
