# Supplementary material
Source: publisher figshare collection journal article supplement (https://plos.figshare.com/articles/dataset/_/115291)

**Figure S5.** Percentage distribution of transcription factor encoding transcripts representing different families.

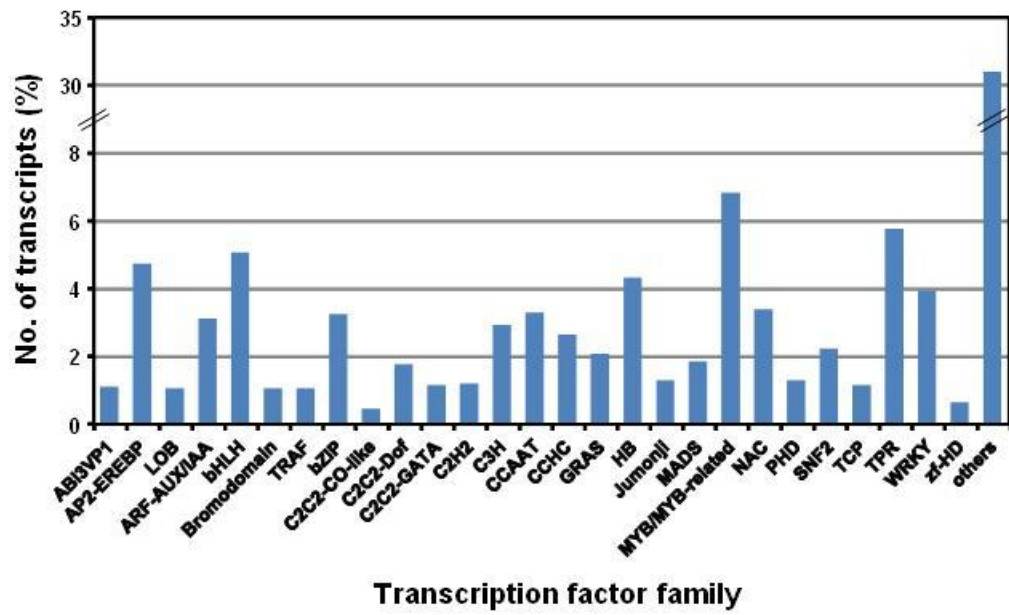

Supplement: Supplementary file 1 [file 1 › Figure_S5.pdf]
