# Supplementary material
Source: publisher figshare collection journal article supplement (https://plos.figshare.com/articles/dataset/_/115291)

**Figure S6.** Distribution of polymorphic SSRs between kabuli/desi and kabuli/wild chickpea along the transcript length.

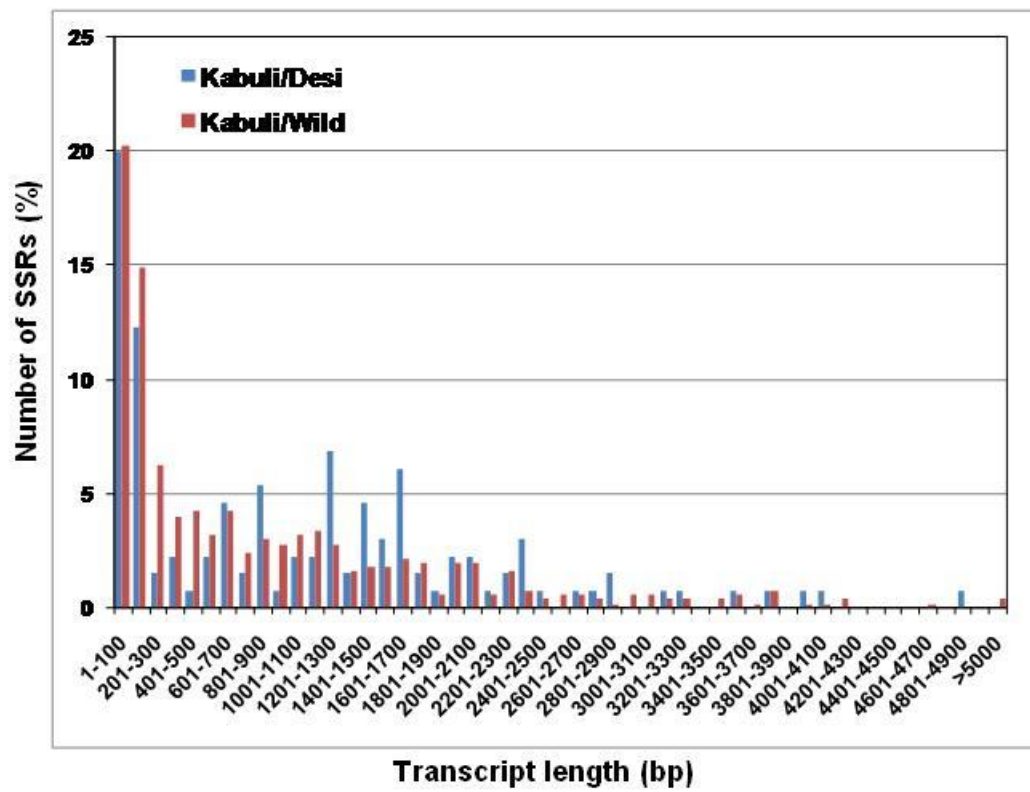

Supplement: Supplementary file 1 [file 1 › Figure_S6.pdf]
