# Supplementary material
Source: publisher figshare collection journal article supplement (https://plos.figshare.com/articles/dataset/_/115291)

**Figure S7.** Phred quality score distribution of the SNP base in the SNPs identified in kabuli/desi and kabuli/wild chickpea.

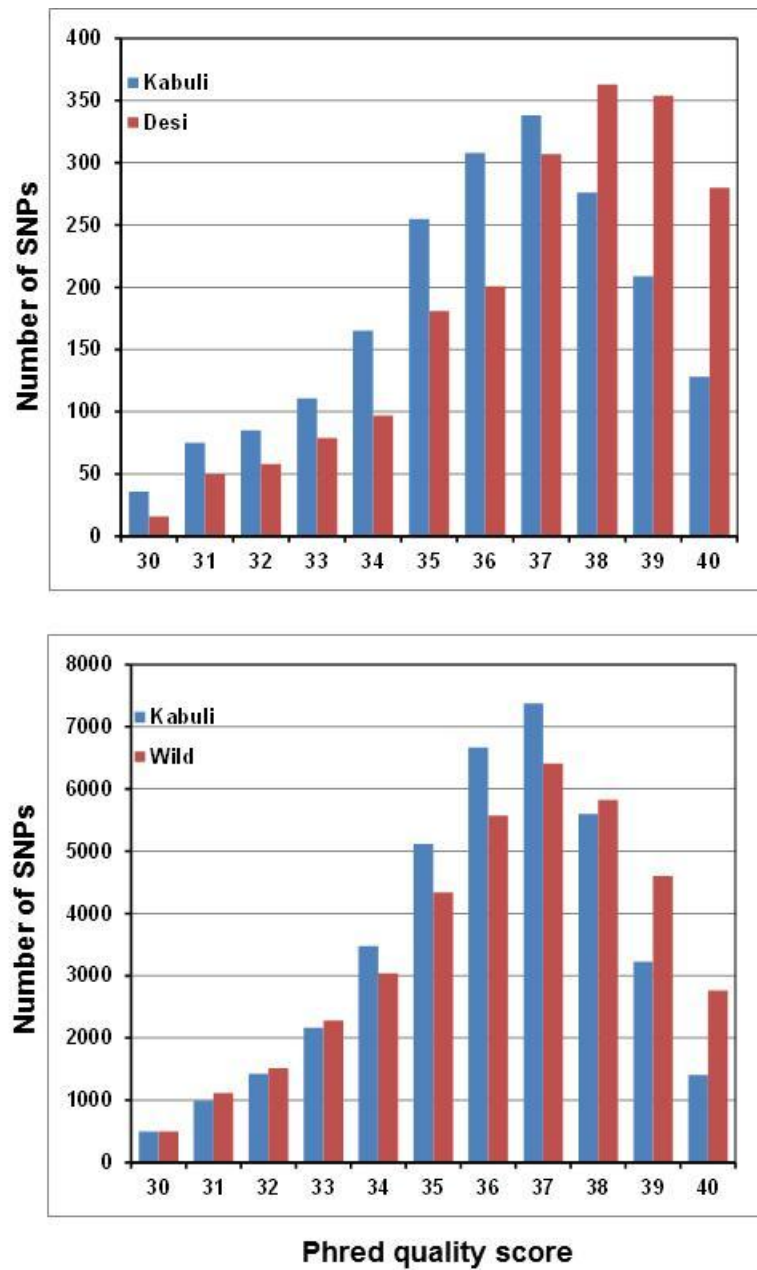

Supplement: Supplementary file 1 [file 1 › Figure_S7.pdf]
