# Supplementary material
Source: publisher figshare collection journal article supplement (https://plos.figshare.com/articles/dataset/_/115291)
Supplement: Supplementary file 1 [file 1 › Table_S1.pdf]

**Table S1.** Quality filtering of sequencing data generated for transcriptome of kabuli-type chickpea.

**Illumina data**

| Library/Tissue type       | Total no. of reads | Fastq file size (GB) | No. of reads after filtering low quality reads <sup>1</sup> | No. of reads after removing primer/adaptor containing reads <sup>2</sup> |
|---------------------------|--------------------|----------------------|-------------------------------------------------------------|--------------------------------------------------------------------------|
| Mixed (101 bp single-end) | 44107639           | 11.68                | 37584774                                                    | 37502174                                                                 |
| Mixed (100 bp paired-end) | 76970476           | 20.38                | 70927890                                                    | 70927626                                                                 |
| Total                     | 121078115          | 32.06                | 108512664                                                   | 108429800                                                                |

<sup>1</sup>Number of read after removing low-quality reads with Phred quality score <20 in more than 30% of bases

<sup>2</sup>Number of reads after removing reads containing primer/adaptor sequence

**Roche 454 data**

| Library/Tissue type | Total reads | Low quality reads <sup>1</sup> | Trimmed reads <sup>2</sup> | Trashed reads <sup>3</sup> | High quality mRNA reads <sup>4</sup> | Average length <sup>5</sup> |
|---------------------|-------------|--------------------------------|----------------------------|----------------------------|--------------------------------------|-----------------------------|
| Mixed               | 1775115     | 25975                          | 56229                      | 105304                     | 1643836                              | 365.3                       |

<sup>1</sup>Phred quality score <20 in more than 30% of bases

<sup>2</sup>No. of trimmed reads containing primer/adaptor sequence and more than 7-bp-long homopolymer starting from the first bp of the homopolymer

<sup>3</sup>No. of short reads less than 100 bp removed

<sup>4</sup>No. of high-quality reads corresponding to m-RNA sequences used for further analysis

<sup>5</sup>Average length of high-quality mRNA reads in bp
