# Supplementary material
Source: publisher figshare collection journal article supplement (https://plos.figshare.com/articles/dataset/_/115291)
Supplement: Supplementary file 1 [file 1 › Table_S2.pdf]

**Table S2. Assembly statistics/validation of Roche 454 data using different assembly programs for kabuli chickpea.**

|                                                                                  | <i>De novo</i> assembly |                |                | Reference assembly |                | Merged assembly                |                            |
|----------------------------------------------------------------------------------|-------------------------|----------------|----------------|--------------------|----------------|--------------------------------|----------------------------|
|                                                                                  | Newbler                 | CLC            | TGICL          | Newbler            | CLC            | Newbler +<br>unmapped<br>reads | CLC +<br>unmapped<br>reads |
| Total contigs ( $\geq 100$ bp)                                                   | 32088                   | 38318          | 49300          | 32728              | 26353          | 39517                          | 36408                      |
| Large contigs ( $\geq 1000$ bp)                                                  | 14706                   | 12020          | 13318          | 10073              | 12410          | 10315                          | 13492                      |
| Total size (Mb)                                                                  | 37.47                   | 35.43          | 41.77          | 27.94              | 30.72          | 31.34                          | 37.76                      |
| Maximum contig length (bp)                                                       | 15488                   | 13246          | 9091           | 15587              | 15601          | 15587                          | 15601                      |
| Average contig length (bp)                                                       | 1167.84                 | 924.67         | 847.43         | 853.82             | 1165.77        | 793.05                         | 1037                       |
| N50 contig length (bp)                                                           | 1587                    | 1237           | 1020           | 1399               | 1682           | 1273                           | 1501                       |
| Total number of reads mapped (%)                                                 | 1377154 (83.8)          | 1428531 (86.9) | 1536791 (93.5) | 1304966 (79.4)     | 1384000 (84.2) | 1336398 (81.3)                 | 1499259 (91.2)             |
| Total number of uniquely mapped reads (%)                                        | 1044081 (63.5)          | 1415804 (86.1) | 1439283 (87.6) | 1299566 (79.1)     | 1275808 (77.6) | 1331833 (81.0)                 | 1406584 (85.6)             |
| Contigs with significant hits (%) <sup>1</sup>                                   | 26795 (83.5)            | 28116 (73.4)   | 39403 (79.9)   | 25683 (78.5)       | 22505 (85.4)   | 27408 (69.4)                   | 27406 (75.3)               |
| Number of contigs with $\geq 80\%$ coverage of soybean proteome (%) <sup>2</sup> | 10534 (32.8)            | 7980 (20.8)    | 8404 (17.1)    | 9056 (27.7)        | 10188 (38.6)   | 9206 (23.3)                    | 10354 (28.4)               |
| Unique soybean proteins with significant hits (%) <sup>3</sup>                   | 16468 (29.5)            | 19857 (35.6)   | 22316 (40.0)   | 18525 (33.2)       | 17142 (30.7)   | 19511 (35.0)                   | 19544 (35.0)               |
| Number of unique soybean proteins with $\geq 80\%$ coverage (%) <sup>4</sup>     | 8487 (15.2)             | 7631 (13.7)    | 7736 (13.9)    | 8569 (15.4)        | 9275 (16.6)    | 8706 (15.6)                    | 9545 (17.1)                |

<sup>1</sup> Contigs showing significant hit ( $E$ -value  $\leq 1e-5$ ) with soybean proteins

<sup>2</sup> Contigs showing  $\geq 80\%$  coverage of soybean proteins

<sup>3</sup> Unique soybean proteins to which contigs show significant hit ( $E$ -value  $\leq 1e-5$ )

<sup>4</sup> Unique soybean proteins to which contigs show  $\geq 80\%$  coverage
