# Supplementary material
Source: publisher figshare collection journal article supplement (https://plos.figshare.com/articles/dataset/_/115291)
Supplement: Supplementary file 1 [file 1 › Table_S3.pdf]

**Table S3. Assembly statistics of short-read Illumina data using different assembly programs at different K-mer values for kabuli chickpea.**

**(A) Assembly statistics using all the high-quality Illumina data (total input reads 108,429,800)**

**Assembly statistics using Velvet with different K-mer values**

|                                | K35    | K45    | K55    | K65    | K75    | K77    | K83    | K85    | K87    | K89    | K91    | K93   | K95    |
|--------------------------------|--------|--------|--------|--------|--------|--------|--------|--------|--------|--------|--------|-------|--------|
| Total contigs ( $\geq 100$ bp) | 298342 | 256365 | 203948 | 123037 | 75552  | 68133  | 49436  | 44262  | 40040  | 36138  | 32666  | 28820 | 21535  |
| Assembly size (Mb)             | 65.82  | 66.13  | 63.76  | 53.45  | 43.91  | 41.96  | 35.86  | 33.61  | 31.14  | 28.29  | 24.70  | 2013  | 13.35  |
| Contigs ( $>1000$ bp)          | 1931   | 3600   | 7685   | 10117  | 11177  | 11203  | 10845  | 10523  | 9857   | 8995   | 7542   | 5582  | 3036   |
| Min. contig length (bp)        | 100    | 100    | 109    | 129    | 149    | 153    | 165    | 169    | 173    | 177    | 181    | 185   | 189    |
| Max. contig length (bp)        | 4196   | 5714   | 9822   | 10849  | 8406   | 8056   | 11837  | 13691  | 13653  | 12156  | 8799   | 7497  | 5542   |
| Average contig length (bp)     | 220.63 | 257.98 | 312.67 | 434.45 | 581.28 | 615.93 | 725.58 | 759.41 | 777.89 | 783.07 | 756.25 | 698.7 | 620.33 |
| N50 contig length              | 237    | 289    | 404    | 585    | 833    | 893    | 1072   | 1115   | 1123   | 1106   | 1024   | 883   | 713    |

**Assembly statistics using Oases with different K-mer values**

|                                | K31     | K35     | K37     | K39     | K41     | K43     | K45     | K47     | K55     | K65     |
|--------------------------------|---------|---------|---------|---------|---------|---------|---------|---------|---------|---------|
| Total contigs ( $\geq 100$ bp) | 42970   | 42832   | 42680   | 42371   | 42317   | 42108   | 42151   | 42063   | 41247   | 39192   |
| Assembly size (Mb)             | 47.76   | 48.04   | 48.16   | 48.04   | 47.95   | 47.75   | 47.65   | 47.40   | 45.78   | 42.82   |
| Contigs ( $>1000$ bp)          | 16949   | 17096   | 17170   | 17168   | 17137   | 17096   | 17055   | 17023   | 16481   | 15568   |
| Min. contig length (bp)        | 100     | 100     | 101     | 100     | 100     | 100     | 100     | 100     | 100     | 100     |
| Max. contig length (bp)        | 16914   | 17399   | 17400   | 16914   | 16914   | 16835   | 16914   | 16835   | 27972   | 15691   |
| Average contig length (bp)     | 1111.49 | 1123.99 | 1128.49 | 1133.86 | 1138.02 | 1134.16 | 1130.55 | 1127.05 | 1109.97 | 1092.68 |
| N50 contig length              | 2114    | 2102    | 2090    | 2075    | 2065    | 2050    | 2031    | 2006    | 1968    | 1891    |

### Assembly statistics using SOAPdenovo with different K-mer values

|                                | K69    | K73    | K75    | K79    | K83    | K85    | K87    | K89    | K91    | K93     | K95    |
|--------------------------------|--------|--------|--------|--------|--------|--------|--------|--------|--------|---------|--------|
| Total contigs ( $\geq 100$ bp) | 134916 | 107009 | 94494  | 72210  | 52594  | 43963  | 36385  | 29776  | 24219  | 19338   | 13355  |
| Assembly size (Mb)             | 57.84  | 52.55  | 49.88  | 44.39  | 38.68  | 35.69  | 32.56  | 29.08  | 24.85  | 19.69   | 12.17  |
| Contigs ( $>1000$ bp)          | 14758  | 14685  | 14538  | 13971  | 13145  | 12604  | 11843  | 10918  | 9493   | 7522    | 4437   |
| Min. contig length (bp)        | 100    | 100    | 100    | 100    | 100    | 100    | 100    | 100    | 100    | 100     | 100    |
| Max. contig length (bp)        | 15945  | 16206  | 16824  | 15262  | 15615  | 15274  | 13847  | 14106  | 16564  | 11730   | 8761   |
| Average contig length (bp)     | 428.71 | 491.1  | 527.87 | 614.87 | 735.58 | 812.01 | 895.13 | 976.76 | 1026.1 | 1018.41 | 911.88 |
| N50 contig length              | 920    | 1076   | 1157   | 1313   | 1462   | 1520   | 1596   | 1617   | 1603   | 1489    | 1275   |

### Assembly statistics using ABySS with different K-mer values

|                                | K69     | K73     | K75     | K77     | K79     | K83     | K85     | K87    | K93    |
|--------------------------------|---------|---------|---------|---------|---------|---------|---------|--------|--------|
| Total contigs ( $\geq 100$ bp) | 54510   | 49698   | 47836   | 45915   | 43886   | 42449   | 39315   | 37055  | 31797  |
| Assembly size (Mb)             | 56.29   | 53.11   | 51.62   | 50.15   | 48.31   | 45.60   | 42.39   | 39.37  | 28.12  |
| Contigs ( $>1000$ bp)          | 21771   | 20770   | 20248   | 19728   | 19042   | 17918   | 16688   | 15465  | 10544  |
| Min. contig length (bp)        | 100     | 100     | 100     | 100     | 100     | 100     | 100     | 100    | 100    |
| Max. contig length (bp)        | 15737   | 15737   | 15651   | 15651   | 15651   | 15651   | 15651   | 15580  | 15580  |
| Average contig length (bp)     | 1032.68 | 1068.69 | 1079.12 | 1092.33 | 1100.85 | 1074.33 | 1078.32 | 1062.5 | 884.67 |
| N50 contig length              | 1743    | 1752    | 1751    | 1759    | 1758    | 1729    | 1731    | 1715   | 1537   |

**(B) Assembly statistics using non-redundant high-quality Illumina data (total input reads 32,646,926)**

**Assembly statistics using Velvet with different K-mer values**

|                                | K35    | K45    | K55    | K65    | K75    | K77    | K83    | K85    | K87    | K89    | K91    | K93    | K95    |
|--------------------------------|--------|--------|--------|--------|--------|--------|--------|--------|--------|--------|--------|--------|--------|
| Total contigs ( $\geq 100$ bp) | 296657 | 255159 | 201425 | 121873 | 75167  | 68000  | 49352  | 44163  | 39890  | 36085  | 32687  | 28727  | 21365  |
| Assembly size (Mb)             | 65.55  | 65.93  | 63.45  | 53.27  | 43.85  | 41.94  | 35.85  | 33.58  | 31.11  | 28.29  | 24.7   | 20.09  | 13.22  |
| Contigs ( $>1000$ bp)          | 1943   | 3558   | 7716   | 10155  | 11188  | 11199  | 10835  | 10528  | 9873   | 9010   | 7541   | 5553   | 2999   |
| Min. contig length (bp)        | 100    | 100    | 109    | 129    | 149    | 153    | 165    | 169    | 173    | 177    | 181    | 185    | 189    |
| Max. contig length (bp)        | 4718   | 8003   | 9822   | 10849  | 8098   | 8381   | 11837  | 13688  | 13673  | 12162  | 8799   | 7433   | 5542   |
| Average contig length (bp)     | 220.98 | 258.39 | 315.01 | 437.13 | 583.39 | 616.83 | 726.52 | 760.43 | 780.14 | 784.24 | 755.94 | 699.52 | 618.79 |
| N50 contig length              | 238    | 291    | 407    | 588    | 834    | 893    | 1071   | 1117   | 1124   | 1106   | 1023   | 883    | 708    |

**Assembly statistics using Oases with different K-mer values**

|                                | K31     | K35     | K37     | K39     | K41     | K43     | K45     | K47     | K55     | K65     |
|--------------------------------|---------|---------|---------|---------|---------|---------|---------|---------|---------|---------|
| Total contigs ( $\geq 100$ bp) | 37456   | 37693   | 37576   | 37326   | 37219   | 37235   | 37305   | 37431   | 36296   | 34835   |
| Assembly size (Mb)             | 45.98   | 46.41   | 46.39   | 46.36   | 46.30   | 46.13   | 46.05   | 45.92   | 44.37   | 41.63   |
| Contigs ( $>1000$ bp)          | 16632   | 16854   | 16861   | 16886   | 16877   | 16891   | 16885   | 16901   | 16492   | 15588   |
| Min. contig length (bp)        | 100     | 100     | 100     | 100     | 100     | 101     | 100     | 102     | 100     | 100     |
| Max. contig length (bp)        | 16914   | 17584   | 17587   | 17587   | 16835   | 16835   | 16835   | 16835   | 15691   | 16403   |
| Average contig length (bp)     | 1127.79 | 1231.53 | 1234.65 | 1242.17 | 1244.05 | 1238.98 | 1234.65 | 1226.88 | 1222.58 | 1195.12 |
| N50 contig length              | 2153    | 2139    | 2127    | 2120    | 2108    | 2083    | 2058    | 2029    | 2006    | 1930    |

### Assembly statistics using SOAPdenovo with different K-mer values

|                                | K69    | K73    | K75    | K79    | K83    | K85    | K87    | K89    | K91    | K93    |
|--------------------------------|--------|--------|--------|--------|--------|--------|--------|--------|--------|--------|
| Total contigs ( $\geq 100$ bp) | 149493 | 121607 | 108564 | 84583  | 63884  | 54810  | 47102  | 40317  | 34681  | 28822  |
| Assembly size (Mb)             | 55.70  | 50.83  | 43.84  | 43.20  | 37.80  | 34.91  | 31.83  | 28.37  | 24.09  | 18.71  |
| Contigs ( $>1000$ bp)          | 11123  | 11334  | 11412  | 11309  | 10829  | 10425  | 9689   | 8721   | 6990   | 4747   |
| Min. contig length (bp)        | 100    | 100    | 100    | 100    | 100    | 100    | 100    | 100    | 100    | 100    |
| Max. contig length (bp)        | 8224   | 8077   | 8051   | 9534   | 11836  | 13687  | 13661  | 8799   | 8799   | 7370   |
| Average contig length (bp)     | 372.59 | 418.03 | 445.32 | 510.81 | 591.76 | 637.06 | 675.94 | 703.84 | 694.87 | 649.21 |
| N50 contig length              | 599    | 692    | 750    | 881    | 1004   | 1053   | 1068   | 1049   | 955    | 798    |

### Assembly statistics using ABySS with different K-mer values

|                                | K69    | K73    | K75    | K77    | K79    | K83    | K85    | K87    | K89    | K93    |
|--------------------------------|--------|--------|--------|--------|--------|--------|--------|--------|--------|--------|
| Total contigs ( $\geq 100$ bp) | 93093  | 93028  | 92208  | 84667  | 77257  | 66082  | 61360  | 54087  | 93056  | 74558  |
| Assembly size (Mb)             | 46.43  | 46.73  | 46.28  | 44.64  | 42.89  | 39.68  | 37.94  | 35.45  | 39.17  | 30.94  |
| Contigs ( $>1000$ bp)          | 12781  | 12739  | 12601  | 12554  | 12395  | 12087  | 11774  | 11408  | 10398  | 8226   |
| Min. contig length (bp)        | 100    | 100    | 100    | 100    | 100    | 100    | 100    | 100    | 100    | 100    |
| Max. contig length (bp)        | 15643  | 15643  | 15643  | 15643  | 15643  | 15643  | 15643  | 15549  | 13687  | 15582  |
| Average contig length (bp)     | 498.82 | 502.35 | 501.96 | 527.35 | 555.24 | 600.51 | 618.43 | 655.58 | 421.01 | 415.02 |
| N50 contig length              | 1022   | 1011   | 1010   | 1078   | 1135   | 1216   | 1242   | 1297   | 960    | 908    |
