# Supplementary material
Source: publisher figshare collection journal article supplement (https://plos.figshare.com/articles/dataset/_/115291)
Supplement: Supplementary file 1 [file 1 › Table_S4.pdf]

**Table S4. Assembly validation of short-read Illumina data from different assembly programs for kabuli chickpea.**

**(A) Validation of assembly generated using all the high-quality Illumina data (total input reads 108,429,800)**

|                                                                                  | <b>Velvet K89</b> | <b>Oases K39</b> | <b>Abyss K79</b> | <b>SOAPdenovo K91</b> | <b>CLC</b>      |
|----------------------------------------------------------------------------------|-------------------|------------------|------------------|-----------------------|-----------------|
| Total contigs ( $\geq 100$ bp)                                                   | 36138             | 42371            | 43886            | 24219                 | 86472           |
| Large contigs ( $\geq 1000$ bp)                                                  | 8995              | 17168            | 19042            | 9493                  | 19489           |
| Total size (Mb)                                                                  | 28.29             | 48.04            | 48.31            | 24.85                 | 64.64           |
| Maximum contig length (bp)                                                       | 12156             | 16914            | 15651            | 16564                 | 15776           |
| Average contig length (bp)                                                       | 783.07            | 1133.86          | 1100.85          | 1026.1                | 747.58          |
| N50 contig length (bp)                                                           | 1106              | 2075             | 1758             | 1603                  | 1293            |
| Total number of reads mapped (%)                                                 | 90574343 (83.5)   | 85359468 (78.7)  | 101800502 (93.9) | 90953370 (83.9)       | 97198031 (89.6) |
| Total number of uniquely mapped reads (%)                                        | 90355336 (83.3)   | 85212654 (78.6)  | 69076400 (63.7)  | 90757537 (83.7)       | 96615321 (89.1) |
| Contigs with significant hits (%) <sup>1</sup>                                   | 30676 (84.9)      | 24304 (57.4)     | 36652 (83.5)     | 21550 (89.0)          | 33801 (39.1)    |
| Number of contigs with $\geq 80\%$ coverage of soybean proteome (%) <sup>2</sup> | 8201 (22.7)       | 11187 (26.4)     | 15521 (35.4)     | 7563 (31.2)           | 15080 (17.4)    |
| Unique soybean proteins with significant hits (%) <sup>3</sup>                   | 19227 (34.5)      | 19054 (34.2)     | 19122 (34.3)     | 15816 (28.4)          | 22004 (39.4)    |
| Number of unique soybean proteins with $\geq 80\%$ coverage (%) <sup>4</sup>     | 7821 (14.0)       | 10561 (18.9)     | 12755 (22.9)     | 7225 (13.0)           | 13941 (25.0)    |

<sup>1</sup> Contigs showing significant hit ( $E$ -value  $\leq 1e-5$ ) with soybean proteins

<sup>2</sup> Contigs showing  $\geq 80\%$  coverage of soybean proteins

<sup>3</sup> Unique soybean proteins to which contigs show significant hit ( $E$ -value  $\leq 1e-5$ )

<sup>4</sup> Unique soybean proteins to which contigs show  $\geq 80\%$  coverage

**(B) Validation of assembly generated using non-redundant high-quality Illumina data (total input reads 32,646,926)**

|                                                                                  | <b>Velvet K87</b> | <b>Oases K41</b> | <b>Abyss K87</b> | <b>SOAPdenovo K87</b> | <b>CLC</b>      |
|----------------------------------------------------------------------------------|-------------------|------------------|------------------|-----------------------|-----------------|
| Total contigs ( $\geq 100$ bp)                                                   | 39890             | 37219            | 54087            | 47102                 | 92139           |
| Large contigs ( $\geq 1000$ bp)                                                  | 9873              | 16877            | 11408            | 9689                  | 18341           |
| Total size (Mb)                                                                  | 31.11             | 46.30            | 35.45            | 31.83                 | 64.00           |
| Maximum contig length (bp)                                                       | 13673             | 16835            | 15549            | 13661                 | 15776           |
| Average contig length (bp)                                                       | 780.14            | 1244.05          | 655.58           | 675.94                | 694.7           |
| N50 contig length (bp)                                                           | 1124              | 2108             | 1297             | 1068                  | 1087            |
| Total number of reads mapped (%)                                                 | 25698591 (78.7)   | 26101627 (80.0)  | 28025738 (85.8)  | 26463504 (81.1)       | 28452150 (87.2) |
| Total number of uniquely mapped reads (%)                                        | 25602922 (78.4)   | 26078193 (79.9)  | 27775145 (85.1)  | 26406693 (80.9)       | 28366186 (86.9) |
| Contigs with significant hits (%) <sup>1</sup>                                   | 32843 (82.3)      | 23342 (62.7)     | 40325 (74.6)     | 38417 (81.6)          | 36966 (40.0)    |
| Number of contigs with $\geq 80\%$ coverage of soybean proteome (%) <sup>2</sup> | 8800 (22.1)       | 11307 (30.4)     | 11283 (20.9)     | 8722 (18.5)           | 12942 (14.1)    |
| Unique soybean proteins with significant hits (%) <sup>3</sup>                   | 20105 (36.0)      | 18619 (33.4)     | 20269 (36.3)     | 20553 (36.8)          | 23081 (41.4)    |
| Number of unique soybean proteins with $\geq 80\%$ coverage (%) <sup>4</sup>     | 8403 (15.1)       | 10672 (19.1)     | 10691 (19.2)     | 8321 (14.9)           | 12051 (21.6)    |

<sup>1</sup> Contigs showing significant hit ( $E$ -value  $\leq 1e-5$ ) with soybean proteins

<sup>2</sup> Contigs showing  $\geq 80\%$  coverage of soybean proteins

<sup>3</sup> Unique soybean proteins to which contigs show significant hit ( $E$ -value  $\leq 1e-5$ )

<sup>4</sup> Unique soybean proteins to which contigs show  $\geq 80\%$  coverage
