# Supplementary material
Source: publisher figshare collection journal article supplement (https://plos.figshare.com/articles/dataset/_/115291)
Supplement: Supplementary file 1 [file 1 › Table_S5.pdf]

**Table S5. Statistics of SSRs identified in kabuli chickpea transcripts.**

|                                                       |                 |
|-------------------------------------------------------|-----------------|
| <b>SSR mining</b>                                     |                 |
| Total number of sequences examined                    | 43,389          |
| Total size of examined sequences (bp)                 | 46,212,215      |
| Total number of identified SSRs                       | 5,409           |
| Number of SSR containing sequences                    | 4,398 (10.14%)  |
| Number of sequences containing more than one SSR      | 743             |
| Number of SSRs present in compound formation          | 478             |
| Frequency of SSRs                                     | One per 8.54 kb |
|                                                       |                 |
| <b>Distribution of SSRs in different repeat types</b> |                 |
| Di-nucleotide                                         | 2,216 (40.97%)  |
| Tri-nucleotide                                        | 2,920 (53.98%)  |
| Tetra-nucleotide                                      | 132 (2.44%)     |
| Penta-nucleotide                                      | 48 (0.89%)      |
| Hexa-nucleotide                                       | 93 (1.72%)      |
