# Supplementary material
Source: publisher figshare collection journal article supplement (https://plos.figshare.com/articles/dataset/_/115291)
Supplement: Supplementary file 1 [file 1 › Table_S6.pdf]

**Table S6. Frequency of SSRs identified in kabuli chickpea transcripts.**

[illegible]

[illegible]
