# Supplementary material
Source: publisher figshare collection journal article supplement (https://plos.figshare.com/articles/dataset/_/115291)
Supplement: Supplementary file 1 [file 1 › Table_S7.pdf]

**Table S7.** Primers designed for SSRs identified in the kabuli chickpea transcriptome.

| SSR_ID       | Transcript ID | SSR     | Start | End  | Tissue specificity | TF family | Forward primer (5'-3') | Reverse primer (5'-3') | Annealing temperature (°C) | Product size (bp) |
|--------------|---------------|---------|-------|------|--------------------|-----------|------------------------|------------------------|----------------------------|-------------------|
| CakTSSR00001 | CakTC00018    | (CTT)9  | 59    | 85   | --                 | --        |                        |                        |                            |                   |
| CakTSSR00002 | CakTC00026    | (TC)8   | 15    | 30   | Flower bud         | --        |                        |                        |                            |                   |
| CakTSSR00003 | CakTC00028    | (GA)6   | 1141  | 1152 | --                 | --        | CTGCAGTAACACAGTTGATGA  | CGGATTATAGTTTGGGAAAT   | 54.85,55                   | 150               |
| CakTSSR00004 | CakTC00046    | (TGA)5  | 87    | 101  | --                 | --        |                        |                        |                            |                   |
| CakTSSR00005 | CakTC00088    | (GGT)6  | 2     | 19   | --                 | --        |                        |                        |                            |                   |
| CakTSSR00006 | CakTC00093    | (TTTA)5 | 1     | 20   | --                 | --        |                        |                        |                            |                   |
| CakTSSR00007 | CakTC00095    | (TC)7   | 8     | 21   | --                 | PLATZ     |                        |                        |                            |                   |
| CakTSSR00008 | CakTC00096    | (GAA)5  | 346   | 360  | --                 | --        | TCTGCAAGTCTAAAAGCATGT  | ATCGGGGATTCTAAATGTATC  | 55.38,54.74                | 149               |
| CakTSSR00009 | CakTC00152    | (GA)11  | 204   | 225  | --                 | --        |                        |                        |                            |                   |
| CakTSSR00010 | CakTC00195    | (ATA)7  | 1175  | 1195 | --                 | WRKY      | CACCATTTCTACTGTCACAC   | TATAAAGTGCTTGCAATGA    | 55.51,54.66                | 150               |
| CakTSSR00011 | CakTC00196    | (TA)8   | 81    | 96   | --                 | --        |                        |                        |                            |                   |
| CakTSSR00012 | CakTC00220    | (ATA)5  | 274   | 288  | --                 | --        |                        |                        |                            |                   |
| CakTSSR00013 | CakTC00244    | (AG)8   | 95    | 110  | --                 | --        |                        |                        |                            |                   |
| CakTSSR00014 | CakTC00336    | (CT)8   | 799   | 814  | --                 | --        |                        |                        |                            |                   |
| CakTSSR00015 | CakTC00352    | (AG)8   | 67    | 82   | --                 | C3H       |                        |                        |                            |                   |
| CakTSSR00016 | CakTC00372    | (CT)13  | 93    | 118  | --                 | --        |                        |                        |                            |                   |
| CakTSSR00017 | CakTC00378    | (GGT)5  | 188   | 202  | --                 | --        |                        |                        |                            |                   |
| CakTSSR00018 | CakTC00402    | (GA)10  | 914   | 933  | --                 | C2C2-GATA |                        |                        |                            |                   |
| CakTSSR00019 | CakTC00492    | (ATA)6  | 137   | 154  | --                 | --        |                        |                        |                            |                   |
| CakTSSR00020 | CakTC00504    | (CTC)5  | 637   | 651  | --                 | --        | TCTTCCTTTCTGTGCCTAT    | TTAAGAGGGAGGCTAGTGATT  | 55.78,54.92                | 141               |
| CakTSSR00021 | CakTC00509    | (CT)15  | 17    | 46   | --                 | --        |                        |                        |                            |                   |
| CakTSSR00022 | CakTC00530    | (CT)7   | 690   | 703  | --                 | MADS      |                        |                        |                            |                   |
| CakTSSR00023 | CakTC00577    | (GA)6   | 170   | 181  | --                 | --        | AGACCCTTTTGTCTCCTCTC   | AGCTTTGATGTTCTCTTCTT   | 54.98,54.94                | 148               |
| CakTSSR00024 | CakTC00579    | (TTG)5  | 369   | 383  | --                 | --        | CCACCTTTAATTTTTCACCTT  | TGAATGATGAAGAAATGTTCC  | 55.1,55.11                 | 148               |
| CakTSSR00025 | CakTC00589    | (TTC)6  | 416   | 433  | --                 | --        |                        |                        |                            |                   |
| CakTSSR00026 | CakTC00646    | (GA)7   | 1984  | 1997 | --                 | --        |                        |                        |                            |                   |
| CakTSSR00027 | CakTC00669    | (GT)7   | 119   | 132  | --                 | --        |                        |                        |                            |                   |
| CakTSSR00028 | CakTC00672    | (AG)8   | 1966  | 1981 | --                 | --        |                        |                        |                            |                   |
| CakTSSR00029 | CakTC00689    | (CAC)5  | 34    | 48   | --                 | --        |                        |                        |                            |                   |
| CakTSSR00030 | CakTC00695    | (TTC)6  | 143   | 160  | --                 | --        | AAAAGCTCTGTTTTTGTGTG   | CACTATCAAATCACCTCAACC  | 54.87,54.64                | 163               |
| CakTSSR00031 | CakTC00713    | (AGA)5  | 100   | 114  | --                 | --        |                        |                        |                            |                   |
| CakTSSR00032 | CakTC00745    | (TC)16  | 96    | 127  | --                 | --        |                        |                        |                            |                   |
| CakTSSR00033 | CakTC00748    | (AAT)5  | 353   | 367  | --                 | PHD       | CCTCTCGATCATCTCTACTCC  | GAATCAATTTCTTCACCGTTA  | 55.55,54.49                | 149               |

|              |            |         |      |      |             |          |                       |                       |             |     |
|--------------|------------|---------|------|------|-------------|----------|-----------------------|-----------------------|-------------|-----|
| CakTSSR00034 | CakTC00771 | (TCT)6  | 38   | 55   | --          | --       |                       |                       |             |     |
| CakTSSR00035 | CakTC00775 | (TTCT)5 | 180  | 199  | --          | --       |                       |                       |             |     |
| CakTSSR00036 | CakTC00823 | (GGT)6  | 144  | 161  | --          | --       | AGAGGTCTTGAAGAGGATCTG | CAACATCAATTCATTCCAAGT | 55.17,55.06 | 150 |
| CakTSSR00037 | CakTC00894 | (AGA)5  | 1201 | 1215 | --          | BSD      |                       |                       |             |     |
| CakTSSR00038 | CakTC00917 | (TGA)5  | 1077 | 1091 | --          | --       | TTTACAATGGTTTCAGCTTGT | ACACACTTCAAAACAACCAAA | 55.07,55.72 | 150 |
| CakTSSR00039 | CakTC00962 | (AGG)7  | 247  | 267  | --          | --       | CACATGGAAACATCAATGAA  | TTGAAGACAAAAAGCACAGAT | 55.21,55.18 | 153 |
| CakTSSR00040 | CakTC00977 | (AC)7   | 58   | 71   | --          | --       |                       |                       |             |     |
| CakTSSR00041 | CakTC00979 | (AG)16  | 274  | 305  | --          | --       | AGGAACAGAGAGTTTGAGACC | GTGTGAAGTTTTTGTCTTTTG | 55.07,54.31 | 138 |
| CakTSSR00042 | CakTC00982 | (GTG)8  | 2833 | 2856 | --          | --       | CTTCTTTTAATTGAAGGGTCA | CCCTCTTTTAAACCAAAACAT | 53.86,55.1  | 158 |
| CakTSSR00043 | CakTC00990 | (CT)7   | 388  | 401  | --          | --       |                       |                       |             |     |
| CakTSSR00044 | CakTC01004 | (GA)7   | 130  | 143  | --          | --       | CGGTTTTACAATGCTACTGAC | ACAACAGTACCCAACATCATC | 55.11,54.81 | 145 |
| CakTSSR00045 | CakTC01014 | (CTT)5  | 2982 | 2996 | --          | --       | TCCCATGTGAGTTTCTGTTAC | CAAAGTTAAGTGCTGCTGAGT | 55.13,55.04 | 152 |
| CakTSSR00046 | CakTC01039 | (AG)11  | 97   | 118  | --          | --       |                       |                       |             |     |
| CakTSSR00047 | CakTC01042 | (AT)7   | 1    | 14   | --          | --       |                       |                       |             |     |
| CakTSSR00048 | CakTC01044 | (AG)21  | 1809 | 1850 | --          | --       |                       |                       |             |     |
| CakTSSR00049 | CakTC01081 | (CT)14  | 103  | 130  | --          | --       | CAATCAAATCATTAACCATCG | CTTCTCTGTTTTTGGGGTACT | 55.61,55.15 | 152 |
| CakTSSR00050 | CakTC01101 | (ATT)6  | 367  | 384  | --          | Trihelix | CCTCTTTGCATTCTCTTGTA  | TTGGCATTGATAAACCTAAAG | 54.88,54.72 | 159 |
| CakTSSR00051 | CakTC01101 | (TCA)6  | 1079 | 1096 | --          | Trihelix | AACACTTGAACATTTCAAACC | ATGGTGATGTTGTACCAAAG  | 54.28,55.02 | 153 |
| CakTSSR00052 | CakTC01189 | (TTC)6  | 228  | 245  | --          | --       |                       |                       |             |     |
| CakTSSR00053 | CakTC01191 | (CT)6   | 26   | 37   | --          | --       |                       |                       |             |     |
| CakTSSR00054 | CakTC01198 | (AAC)6  | 321  | 338  | --          | --       | AGAGATTTTGAAACAACGACA | AATGATATCCGGATTATGTCC | 55.02,55.4  | 126 |
| CakTSSR00055 | CakTC01203 | (GAA)5  | 302  | 316  | --          | --       | GAGCCTTAAAGGTAGTGAAGG | TATGGCGGATACTACTTTGTC | 55.54,56    | 145 |
| CakTSSR00056 | CakTC01211 | (TTG)7  | 352  | 372  | --          | --       | ACTGATGATTGGTACTGATGG | TCGAAAAACCTATCCTTTCAT | 54.91,55.55 | 153 |
| CakTSSR00057 | CakTC01218 | (CAC)5  | 930  | 944  | --          | --       | CTCATGATCAGAATCCATGTT | TTGTGATCTCTTTTGTGCT   | 54.96,55.17 | 153 |
| CakTSSR00058 | CakTC01226 | (GAT)5  | 885  | 899  | --          | --       | AAAGAAGTTGTTGCTGTTGAC | ACCGAGCAAGTTTAGCATTAT | 54.67,55.83 | 147 |
| CakTSSR00059 | CakTC01268 | (GT)7   | 18   | 31   | Mature Leaf | --       |                       |                       |             |     |
| CakTSSR00060 | CakTC01281 | (CT)7   | 110  | 123  | --          | --       | CGGTTTCTCCTTCTCTAAT   | ATGCATTAGAAGGACTCATTG | 54.52,54.49 | 150 |
| CakTSSR00061 | CakTC01285 | (GAA)5  | 310  | 324  | --          | --       | AGAGCCACTGTCCTCTCTG   | GTGTGTGGTGATTCAATTTCT | 55.42,54.95 | 155 |
| CakTSSR00062 | CakTC01304 | (TGA)5  | 218  | 232  | --          | --       |                       |                       |             |     |
| CakTSSR00063 | CakTC01357 | (TC)7   | 79   | 92   | --          | --       |                       |                       |             |     |
| CakTSSR00064 | CakTC01402 | (AG)11  | 11   | 32   | --          | --       |                       |                       |             |     |
| CakTSSR00065 | CakTC01414 | (CT)7   | 1    | 14   | --          | --       |                       |                       |             |     |
| CakTSSR00066 | CakTC01458 | (GAA)6  | 1672 | 1689 | --          | --       |                       |                       |             |     |
| CakTSSR00067 | CakTC01462 | (AT)6   | 2    | 13   | --          | --       |                       |                       |             |     |
| CakTSSR00068 | CakTC01487 | (CT)7   | 16   | 29   | --          | --       |                       |                       |             |     |
| CakTSSR00069 | CakTC01488 | (TGA)8  | 430  | 453  | --          | --       |                       |                       |             |     |
| CakTSSR00070 | CakTC01502 | (GA)6   | 1764 | 1775 | --          | --       |                       |                       |             |     |

|              |            |           |      |      |             |             |                       |                       |             |     |
|--------------|------------|-----------|------|------|-------------|-------------|-----------------------|-----------------------|-------------|-----|
| CakTSSR00071 | CakTC01567 | (AG)7     | 1565 | 1578 | --          | --          |                       |                       |             |     |
| CakTSSR00072 | CakTC01590 | (AC)9     | 805  | 822  | --          | --          |                       |                       |             |     |
| CakTSSR00073 | CakTC01619 | (TTG)8    | 275  | 298  | --          | C2C2-Dof    | ATTGGTGTTTGTTGATTACAC | TTGGAAACAGAACTTATTGGA | 54.97,54.97 | 146 |
| CakTSSR00074 | CakTC01688 | (CTC)5    | 143  | 157  | --          | --          | TCCAATTCATTTCCGATACTA | CTTCATTTTCTCCATTTCCTT | 54.86,55.13 | 162 |
| CakTSSR00075 | CakTC01693 | (CAG)5    | 755  | 769  | --          | AP2-EREBP   | CACACTTTTCCACATCTTCAT | CAGTTGCTAACAATGTGGTG  | 55.13,56.8  | 151 |
| CakTSSR00076 | CakTC01782 | (TCCT)8   | 162  | 193  | --          | --          |                       |                       |             |     |
| CakTSSR00077 | CakTC01785 | (AAT)5    | 73   | 87   | --          | --          |                       |                       |             |     |
| CakTSSR00078 | CakTC01798 | (TC)7     | 93   | 106  | --          | --          |                       |                       |             |     |
| CakTSSR00079 | CakTC01869 | (CTT)5    | 376  | 390  | --          | --          | TTGAAAAGAGGATGGTAAAGA | AGCAATATCAATGCAAGAAGA | 54.22,55.23 | 147 |
| CakTSSR00080 | CakTC01915 | (TC)13    | 43   | 68   | --          | --          |                       |                       |             |     |
| CakTSSR00081 | CakTC01946 | (TAA)5    | 127  | 141  | --          | --          | CATCCCTAAACAACAACAAAA | TGTAAAGACTGATGGGTGAC  | 55.33,55.13 | 154 |
| CakTSSR00082 | CakTC01970 | (CTAA)5   | 143  | 162  | --          | --          | ATTCTTGCTTTAACCGTTTTC | TCGTAGAATTTGGGTGTATG  | 55.39,55.29 | 149 |
| CakTSSR00083 | CakTC01996 | (TC)9     | 128  | 145  | --          | --          | CAAGAGTAGTGATTGGTTTGG | CATTTCTTTTCATTCTCTGC  | 54.9,55.9   | 150 |
| CakTSSR00084 | CakTC02011 | (AT)7     | 138  | 151  | --          | --          |                       |                       |             |     |
| CakTSSR00085 | CakTC02064 | (TC)8     | 2    | 17   | --          | --          |                       |                       |             |     |
| CakTSSR00086 | CakTC02070 | (TG)10    | 617  | 636  | --          | --          |                       |                       |             |     |
| CakTSSR00087 | CakTC02088 | (TAT)5    | 16   | 30   | --          | MYB-related |                       |                       |             |     |
| CakTSSR00088 | CakTC02101 | (TTAAT)5  | 63   | 87   | --          | --          |                       |                       |             |     |
| CakTSSR00089 | CakTC02112 | (TC)19    | 49   | 86   | --          | --          |                       |                       |             |     |
| CakTSSR00090 | CakTC02127 | (ATT)5    | 3060 | 3074 | --          | --          |                       |                       |             |     |
| CakTSSR00091 | CakTC02163 | (AG)18    | 2264 | 2299 | --          | --          |                       |                       |             |     |
| CakTSSR00092 | CakTC02215 | (AAGAGC)5 | 62   | 91   | --          | --          |                       |                       |             |     |
| CakTSSR00093 | CakTC02229 | (TA)6     | 117  | 128  | --          | --          |                       |                       |             |     |
| CakTSSR00094 | CakTC02242 | (AG)8     | 25   | 40   | --          | --          |                       |                       |             |     |
| CakTSSR00095 | CakTC02282 | (CCA)5    | 228  | 242  | --          | --          |                       |                       |             |     |
| CakTSSR00096 | CakTC02333 | (TA)6     | 8    | 19   | --          | --          |                       |                       |             |     |
| CakTSSR00097 | CakTC02351 | (AG)6     | 143  | 154  | --          | --          |                       |                       |             |     |
| CakTSSR00098 | CakTC02374 | (CA)7     | 1    | 14   | --          | --          |                       |                       |             |     |
| CakTSSR00099 | CakTC02409 | (TC)6     | 3047 | 3058 | --          | --          | CACCATTTGAAAGATACCAAC | TATCACAGATTGGGAGAAGA  | 54.67,54.86 | 153 |
| CakTSSR00100 | CakTC02521 | (AGA)5    | 63   | 77   | --          | --          |                       |                       |             |     |
| CakTSSR00101 | CakTC02543 | (GGT)5    | 848  | 862  | --          | --          | AGAGTGCAAGGTTAACATCAG | GTGAACCAAACTGTGAAACAT | 54.63,55.04 | 156 |
| CakTSSR00102 | CakTC02543 | (CAA)5    | 967  | 981  | --          | --          | ATGTTTCACAGTTTGTTTCAC | TCCCATATCTGAAATTGTGTG | 55.04,55.17 | 143 |
| CakTSSR00103 | CakTC02562 | (GAT)6    | 4373 | 4390 | --          | --          | AGATTGAAGAGGGAATTTCAA | AACCCCACTCTCTCTCTCTT  | 55.52,56.18 | 140 |
| CakTSSR00104 | CakTC02570 | (AG)6     | 32   | 43   | --          | --          |                       |                       |             |     |
| CakTSSR00105 | CakTC02617 | (TG)6     | 258  | 269  | --          | --          |                       |                       |             |     |
| CakTSSR00106 | CakTC02618 | (CAC)5    | 426  | 440  | Mature Leaf | --          | CAACTCTCCACCATGTC     | GATAGGAACATCTCAATGTCG | 54.45,54.72 | 149 |
| CakTSSR00107 | CakTC02626 | (AC)11    | 12   | 33   | --          | --          |                       |                       |             |     |

|              |            |            |      |      |       |      |                        |                       |             |     |
|--------------|------------|------------|------|------|-------|------|------------------------|-----------------------|-------------|-----|
| CakTSSR00108 | CakTC02695 | (TTG)7     | 1116 | 1136 | --    | bHLH | GAGGCATGTAATCAACAATTC  | ATGCCTTCAAGTTTCAACAC  | 54.73,55.28 | 148 |
| CakTSSR00109 | CakTC02731 | (AG)9      | 244  | 261  | --    | --   | CTTCGCTTTCTTCATTTTCTT  | CTTGAAGAAATTCAGACCTT  | 55.66,55.2  | 142 |
| CakTSSR00110 | CakTC02773 | (TC)13     | 10   | 35   | --    | --   |                        |                       |             |     |
| CakTSSR00111 | CakTC02781 | (AG)10     | 580  | 599  | --    | --   |                        |                       |             |     |
| CakTSSR00112 | CakTC02788 | (GT)10     | 110  | 129  | --    | --   |                        |                       |             |     |
| CakTSSR00113 | CakTC02827 | (TCTGGT)14 | 609  | 692  | --    | --   | GTAATCCTGGAAGTAGGAGGA  | GGTCACTCAATTCAACATCAG | 54.99,55.56 | 153 |
| CakTSSR00114 | CakTC02861 | (TG)6      | 222  | 233  | --    | --   | GATTGATTTGGGGAAGAGAC   | CCTCTCACATCATCTTCTCAC | 56.04,54.71 | 152 |
| CakTSSR00115 | CakTC02883 | (GAA)5     | 48   | 62   | --    | --   |                        |                       |             |     |
| CakTSSR00116 | CakTC02937 | (CT)14     | 1    | 28   | --    | --   |                        |                       |             |     |
| CakTSSR00117 | CakTC02955 | (TTA)5     | 109  | 123  | --    | --   | CACCTATGAGGACAGTCCAGT  | GTTATCCAATTCATCAATCCA | 54.25,54.92 | 152 |
| CakTSSR00118 | CakTC03007 | (AGA)7     | 132  | 152  | --    | --   | ACGATTTCCGATTTCATCTTA  | GTTCAACACAGAATTCATCAT | 54.81,54.86 | 143 |
| CakTSSR00119 | CakTC03132 | (TC)14     | 111  | 138  | --    | --   |                        |                       |             |     |
| CakTSSR00120 | CakTC03133 | (TC)10     | 79   | 98   | --    | --   |                        |                       |             |     |
| CakTSSR00121 | CakTC03187 | (CT)6      | 1    | 12   | --    | --   |                        |                       |             |     |
| CakTSSR00122 | CakTC03230 | (TC)13     | 18   | 43   | --    | --   |                        |                       |             |     |
| CakTSSR00123 | CakTC03252 | (TGA)11    | 506  | 538  | --    | --   | AATCGTACATCACAACCTCGAT | CAGCATTTACTTTCACCAATC | 54.66,54.99 | 151 |
| CakTSSR00124 | CakTC03307 | (AG)6      | 155  | 166  | --    | --   |                        |                       |             |     |
| CakTSSR00125 | CakTC03355 | (CT)19     | 188  | 225  | --    | --   |                        |                       |             |     |
| CakTSSR00126 | CakTC03394 | (TTC)5     | 235  | 249  | --    | --   | AGCTCGAAGCTGTTAAGATT   | AAGAAAGAGAATGCGAAGAAT | 55.3,55.03  | 147 |
| CakTSSR00127 | CakTC03420 | (AG)6      | 21   | 32   | Shoot | --   |                        |                       |             |     |
| CakTSSR00128 | CakTC03432 | (TG)8      | 89   | 104  | --    | --   |                        |                       |             |     |
| CakTSSR00129 | CakTC03436 | (CAC)6     | 204  | 221  | --    | --   | CCCAACTTTCTAACCCTTTAC  | GGAAGGAATCAAGAGAGGTAG | 54.72,54.71 | 164 |
| CakTSSR00130 | CakTC03445 | (AC)7      | 10   | 23   | --    | --   |                        |                       |             |     |
| CakTSSR00131 | CakTC03451 | (AAC)6     | 323  | 340  | --    | --   | GGCTATCCATCAACAACATAA  | AAGTGAACAACAGCAATGTTT | 55.19,54.96 | 150 |
| CakTSSR00132 | CakTC03458 | (CAA)5     | 90   | 104  | --    | --   |                        |                       |             |     |
| CakTSSR00133 | CakTC03496 | (CT)6      | 44   | 55   | --    | --   |                        |                       |             |     |
| CakTSSR00134 | CakTC03498 | (AG)12     | 33   | 56   | --    | --   |                        |                       |             |     |
| CakTSSR00135 | CakTC03502 | (AAT)6     | 214  | 231  | --    | bHLH | TAAATTCCGACCTTATCAATG  | TCCATCAAAACAAGAGAAAGA | 54.49,55.08 | 158 |
| CakTSSR00136 | CakTC03585 | (CT)10     | 106  | 125  | --    | --   | TTCTCTTACCTCAAGTGCAAC  | AATATGGGAAGAGAAGACCAG | 54.76,54.99 | 157 |
| CakTSSR00137 | CakTC03608 | (AG)6      | 4294 | 4305 | --    | --   | TTTGGTTTGAAGAGAATTGTG  | GAACAGCTTCATATTGGTTGT | 55.45,54.4  | 164 |
| CakTSSR00138 | CakTC03613 | (TC)9      | 85   | 102  | --    | --   |                        |                       |             |     |
| CakTSSR00139 | CakTC03654 | (GAA)5     | 413  | 427  | --    | --   | TGCTAAGTCTTCGAATTCAG   | TTACTCTCCGTTCCTTATCC  | 55.04,55.16 | 180 |
| CakTSSR00140 | CakTC03676 | (GA)12     | 99   | 122  | --    | --   |                        |                       |             |     |
| CakTSSR00141 | CakTC03725 | (TG)7      | 101  | 114  | --    | --   | TTTTCTCTGCTTTCATGTTTC  | AAAGTGAGTCTGCAAAAACAG | 54.83,54.85 | 146 |
| CakTSSR00142 | CakTC03762 | (GAA)8     | 1451 | 1474 | --    | --   | ATTAGTGTGCATTGTCGTCTC  | AAACATGAGATTCCAGATCCT | 55.32,55.22 | 154 |
| CakTSSR00143 | CakTC03764 | (CT)7      | 67   | 80   | --    | --   |                        |                       |             |     |
| CakTSSR00144 | CakTC03766 | (TA)7      | 68   | 81   | --    | --   |                        |                       |             |     |

|              |            |         |      |      |    |           |                       |                       |             |     |
|--------------|------------|---------|------|------|----|-----------|-----------------------|-----------------------|-------------|-----|
| CakTSSR00145 | CakTC03771 | (CCA)5  | 34   | 48   | -- | --        |                       |                       |             |     |
| CakTSSR00146 | CakTC03801 | (GCA)5  | 84   | 98   | -- | --        |                       |                       |             |     |
| CakTSSR00147 | CakTC03814 | (TC)7   | 3    | 16   | -- | --        |                       |                       |             |     |
| CakTSSR00148 | CakTC03814 | (CAA)6  | 351  | 368  | -- | --        | AAGAGAAAGAGATGAAGCACA | TCAATTCCTCTCTTGTGTA   | 54.37,55.08 | 150 |
| CakTSSR00149 | CakTC03814 | (CTA)6  | 799  | 816  | -- | --        | CCACCTGTTACTATTCTTCA  | AAGGAGAATCAGAACCTTCAC | 54.43,55.01 | 151 |
| CakTSSR00150 | CakTC03814 | (GAA)6  | 1116 | 1133 | -- | --        | AGGGTAGCATTACAAGTTGGT | TAGAGGAAAATGCCAATGATA | 55.45,55.02 | 140 |
| CakTSSR00151 | CakTC03835 | (GAA)8  | 134  | 157  | -- | --        |                       |                       |             |     |
| CakTSSR00152 | CakTC03848 | (GA)6   | 87   | 98   | -- | --        |                       |                       |             |     |
| CakTSSR00153 | CakTC03850 | (AG)6   | 29   | 40   | -- | --        |                       |                       |             |     |
| CakTSSR00154 | CakTC03853 | (TA)7   | 57   | 70   | -- | --        |                       |                       |             |     |
| CakTSSR00155 | CakTC03902 | (TCC)7  | 90   | 110  | -- | --        |                       |                       |             |     |
| CakTSSR00156 | CakTC03941 | (TA)6   | 204  | 215  | -- | --        |                       |                       |             |     |
| CakTSSR00157 | CakTC03971 | (GTT)7  | 1185 | 1205 | -- | bHLH      | GTTTTGGAAGTGAATCAACA  | TGAACAACGTTTCTCTCTTC  | 55.28,54.72 | 148 |
| CakTSSR00158 | CakTC03971 | (AG)7   | 1659 | 1672 | -- | bHLH      |                       |                       |             |     |
| CakTSSR00159 | CakTC04020 | (GCT)5  | 726  | 740  | -- | --        | CTTTGTAGTTCTGTCGCATT  | TCTTGTTTCCTGATCTTTCAA | 54.82,55.08 | 152 |
| CakTSSR00160 | CakTC04029 | (AG)7   | 1755 | 1768 | -- | --        |                       |                       |             |     |
| CakTSSR00161 | CakTC04033 | (AG)6   | 126  | 137  | -- | --        |                       |                       |             |     |
| CakTSSR00162 | CakTC04070 | (CTT)7  | 1415 | 1435 | -- | --        |                       |                       |             |     |
| CakTSSR00163 | CakTC04076 | (AGA)6  | 82   | 99   | -- | --        |                       |                       |             |     |
| CakTSSR00164 | CakTC04093 | (CAT)5  | 125  | 139  | -- | --        | TCTTGATCTTGAAACTCCAA  | CCTTCTCCATCCATTATTCTT | 55.08,54.93 | 175 |
| CakTSSR00165 | CakTC04114 | (AT)7   | 2090 | 2103 | -- | --        |                       |                       |             |     |
| CakTSSR00166 | CakTC04143 | (CT)6   | 1    | 12   | -- | --        |                       |                       |             |     |
| CakTSSR00167 | CakTC04146 | (CAG)5  | 28   | 42   | -- | --        |                       |                       |             |     |
| CakTSSR00168 | CakTC04159 | (TTG)5  | 95   | 109  | -- | --        |                       |                       |             |     |
| CakTSSR00169 | CakTC04162 | (TGT)7  | 182  | 202  | -- | AP2-EREBP |                       |                       |             |     |
| CakTSSR00170 | CakTC04196 | (GA)6   | 162  | 173  | -- | --        |                       |                       |             |     |
| CakTSSR00171 | CakTC04226 | (CT)9   | 149  | 166  | -- | --        |                       |                       |             |     |
| CakTSSR00172 | CakTC04294 | (CCT)5  | 65   | 79   | -- | --        |                       |                       |             |     |
| CakTSSR00173 | CakTC04323 | (TCT)7  | 47   | 67   | -- | --        |                       |                       |             |     |
| CakTSSR00174 | CakTC04368 | (ATCT)5 | 140  | 159  | -- | --        |                       |                       |             |     |
| CakTSSR00175 | CakTC04376 | (GAT)5  | 128  | 142  | -- | --        | CAGGTCATGCTTCTCAGAAAT | ACACTATCTCCGTCTCCATCT | 57,55.32    | 148 |
| CakTSSR00176 | CakTC04389 | (CT)17  | 115  | 148  | -- | --        |                       |                       |             |     |
| CakTSSR00177 | CakTC04394 | (AGA)5  | 28   | 42   | -- | --        |                       |                       |             |     |
| CakTSSR00178 | CakTC04397 | (ACA)5  | 307  | 321  | -- | --        | TTCTGATTACTCAGGTGAAGC | CATTCTCATCAAAACAGTTC  | 54.67,54.77 | 149 |
| CakTSSR00179 | CakTC04461 | (CAC)5  | 296  | 310  | -- | --        | CAAAATCAAACACTTCTCCAC | GCTCCAAAATCTAACACATTG | 54.85,54.99 | 154 |
| CakTSSR00180 | CakTC04464 | (CA)6   | 31   | 42   | -- | --        |                       |                       |             |     |
| CakTSSR00181 | CakTC04473 | (CAA)5  | 92   | 106  | -- | --        |                       |                       |             |     |

|              |            |           |      |      |    |            |                         |                        |             |     |
|--------------|------------|-----------|------|------|----|------------|-------------------------|------------------------|-------------|-----|
| CakTSSR00182 | CakTC04474 | (GA)8     | 2020 | 2035 | -- | --         |                         |                        |             |     |
| CakTSSR00183 | CakTC04525 | (AGA)6    | 1    | 18   | -- | --         |                         |                        |             |     |
| CakTSSR00184 | CakTC04586 | (TGA)6    | 376  | 393  | -- | --         | CGATGATCAACTCAATGTCTC   | CCTCCAGGAGTCGTAATAGTT  | 55.65,55.11 | 144 |
| CakTSSR00185 | CakTC04606 | (CA)7     | 129  | 142  | -- | --         | TAAGCGCTGATAAAGTGTTTT   | AAGTCATGATAATCCAGAGCA  | 54.7,54.88  | 166 |
| CakTSSR00186 | CakTC04641 | (ATT)5    | 51   | 65   | -- | --         |                         |                        |             |     |
| CakTSSR00187 | CakTC04664 | (GGT)5    | 600  | 614  | -- | zf-HD      | GGAGAAGAGGGTACCATAGAA   | GAGTGGTGATGGTGGTAGTTA  | 54.99,55    | 137 |
| CakTSSR00188 | CakTC04664 | (CTG)5    | 739  | 753  | -- | zf-HD      | TAACTACCACCATCACCCTC    | CACATGTGGAGGTACAACCTCT | 55,55.07    | 169 |
| CakTSSR00189 | CakTC04691 | (CA)8     | 69   | 84   | -- | --         |                         |                        |             |     |
| CakTSSR00190 | CakTC04694 | (AGA)5    | 262  | 276  | -- | --         |                         |                        |             |     |
| CakTSSR00191 | CakTC04726 | (CTC)5    | 2091 | 2105 | -- | --         | TGAGGTACTCTTGAAGTGCTC   | GATGTTGAATGGAAAAGGACT  | 54.73,55.71 | 150 |
| CakTSSR00192 | CakTC04741 | (CTT)8    | 92   | 115  | -- | --         |                         |                        |             |     |
| CakTSSR00193 | CakTC04745 | (CT)7     | 20   | 33   | -- | --         |                         |                        |             |     |
| CakTSSR00194 | CakTC04750 | (TTTC)6   | 134  | 157  | -- | --         |                         |                        |             |     |
| CakTSSR00195 | CakTC04770 | (TTC)6    | 365  | 382  | -- | --         | GAATTTGCACAAAGAAGAAAC   | TGAATCTGGTTGGTGTGTAAT  | 54.27,55.43 | 248 |
| CakTSSR00196 | CakTC04868 | (AC)7     | 100  | 113  | -- | --         |                         |                        |             |     |
| CakTSSR00197 | CakTC04907 | (TG)8     | 981  | 996  | -- | C2C2-YABBY |                         |                        |             |     |
| CakTSSR00198 | CakTC04931 | (AAC)7    | 545  | 565  | -- | --         | AAATTTTCAGGATTGGGTATC   | TAAGCTGATTGTTCTCTTCCA  | 54.79,55.28 | 175 |
| CakTSSR00199 | CakTC04957 | (ATTTTG)5 | 277  | 306  | -- | --         | CATCATCAATCTCAATTAGACCT | CATGTCCTTGTCCTCAATATAA | 55.03,55.05 | 157 |
| CakTSSR00200 | CakTC04987 | (AT)10    | 14   | 33   | -- | --         |                         |                        |             |     |
| CakTSSR00201 | CakTC04990 | (GT)7     | 141  | 154  | -- | --         |                         |                        |             |     |
| CakTSSR00202 | CakTC05018 | (GA)6     | 587  | 598  | -- | --         |                         |                        |             |     |
| CakTSSR00203 | CakTC05022 | (TGT)6    | 66   | 83   | -- | --         |                         |                        |             |     |
| CakTSSR00204 | CakTC05106 | (TC)9     | 199  | 216  | -- | --         | CATCTGAGAAAAAGCTGAAAA   | GTTTCAAGGTCAAACCTCCAT  | 55,55.78    | 148 |
| CakTSSR00205 | CakTC05111 | (TTA)5    | 140  | 154  | -- | --         | CGATTCTTTTCCTTCTCTTT    | TGTGTGTGAATGGTTACAGAA  | 54.64,54.95 | 157 |
| CakTSSR00206 | CakTC05115 | (TTC)7    | 150  | 170  | -- | --         |                         |                        |             |     |
| CakTSSR00207 | CakTC05148 | (GT)6     | 5    | 16   | -- | --         |                         |                        |             |     |
| CakTSSR00208 | CakTC05152 | (TG)7     | 222  | 235  | -- | --         |                         |                        |             |     |
| CakTSSR00209 | CakTC05187 | (GAA)5    | 155  | 169  | -- | --         | ACATTGCAGTTTCTTCTCAA    | TCTGAACATCAGGGAATAGAA  | 55.18,54.86 | 167 |
| CakTSSR00210 | CakTC05202 | (TC)6     | 569  | 580  | -- | MYB        | AAGTTTCACITTTGTGCCTTA   | TTTGATATATGAGGATGGTG   | 54.41,54.96 | 177 |
| CakTSSR00211 | CakTC05216 | (TTA)6    | 98   | 115  | -- | --         |                         |                        |             |     |
| CakTSSR00212 | CakTC05245 | (GGAAA)5  | 223  | 247  | -- | --         |                         |                        |             |     |
| CakTSSR00213 | CakTC05268 | (AAG)5    | 424  | 438  | -- | --         |                         |                        |             |     |
| CakTSSR00214 | CakTC05276 | (GA)6     | 7    | 18   | -- | --         |                         |                        |             |     |
| CakTSSR00215 | CakTC05277 | (GA)16    | 2043 | 2074 | -- | --         |                         |                        |             |     |
| CakTSSR00216 | CakTC05287 | (GAA)5    | 159  | 173  | -- | --         | CTCTACTCCAACAATGTCACC   | TCCTTCTTCTCTTCTTCTTC   | 54.69,54.55 | 151 |
| CakTSSR00217 | CakTC05316 | (AG)6     | 87   | 98   | -- | --         |                         |                        |             |     |
| CakTSSR00218 | CakTC05322 | (TCA)5    | 322  | 336  | -- | --         | CCACTTTTACGTTTTCTTTTTC  | ATTCCCTCAGATATGGAAGAG  | 55.09,54.91 | 152 |

|              |            |         |      |      |            |      |                       |                       |             |     |
|--------------|------------|---------|------|------|------------|------|-----------------------|-----------------------|-------------|-----|
| CakTSSR00219 | CakTC05322 | (CAT)5  | 1130 | 1144 | --         | --   | CATTATCAGCAGATACGGACT | GATTCTGCTGGAAGTGAAGAT | 54.53,56.04 | 148 |
| CakTSSR00220 | CakTC05332 | (AAC)5  | 98   | 112  | --         | --   |                       |                       |             |     |
| CakTSSR00221 | CakTC05412 | (TC)6   | 24   | 35   | --         | --   |                       |                       |             |     |
| CakTSSR00222 | CakTC05507 | (TCC)5  | 15   | 29   | --         | --   |                       |                       |             |     |
| CakTSSR00223 | CakTC05512 | (GAA)5  | 62   | 76   | --         | --   |                       |                       |             |     |
| CakTSSR00224 | CakTC05543 | (TCT)5  | 33   | 47   | --         | --   |                       |                       |             |     |
| CakTSSR00225 | CakTC05573 | (GTT)5  | 917  | 931  | Young_pod  | --   | ATGAAGTAGGTTGTGGTGTG  | ATTTGGAGCTTCTTCCACTT  | 55.08,55.61 | 161 |
| CakTSSR00226 | CakTC05601 | (TA)7   | 1675 | 1688 | --         | --   |                       |                       |             |     |
| CakTSSR00227 | CakTC05636 | (GT)9   | 35   | 52   | --         | --   |                       |                       |             |     |
| CakTSSR00228 | CakTC05636 | (GAT)6  | 1190 | 1207 | --         | --   | TCTCATCTAGCAAAAGGAAAA | TGAGCTTCATTTGGAGTAGAA | 54.54,55.28 | 154 |
| CakTSSR00229 | CakTC05652 | (GAA)5  | 113  | 127  | --         | --   |                       |                       |             |     |
| CakTSSR00230 | CakTC05655 | (GAA)8  | 98   | 121  | --         | --   |                       |                       |             |     |
| CakTSSR00231 | CakTC05656 | (AGA)6  | 2964 | 2981 | --         | --   |                       |                       |             |     |
| CakTSSR00232 | CakTC05697 | (GA)7   | 2820 | 2833 | --         | --   |                       |                       |             |     |
| CakTSSR00233 | CakTC05698 | (CT)18  | 51   | 86   | --         | --   |                       |                       |             |     |
| CakTSSR00234 | CakTC05710 | (CAT)9  | 89   | 115  | --         | --   |                       |                       |             |     |
| CakTSSR00235 | CakTC05726 | (CA)6   | 1    | 12   | --         | --   |                       |                       |             |     |
| CakTSSR00236 | CakTC05731 | (ACA)6  | 210  | 227  | --         | --   |                       |                       |             |     |
| CakTSSR00237 | CakTC05775 | (CT)8   | 102  | 117  | --         | --   | CAAACACCTCTCTTTCCTTCT | CACACACATAAGATGGAACCT | 55.26,55    | 140 |
| CakTSSR00238 | CakTC05873 | (AGA)5  | 103  | 117  | --         | --   | GTCTCTCATGTCTTGCATCTC | CTTTCGATGAAGAGTTCCTTG | 54.87,54.43 | 156 |
| CakTSSR00239 | CakTC05951 | (TTG)5  | 147  | 161  | Flower bud | --   |                       |                       |             |     |
| CakTSSR00240 | CakTC05959 | (TCT)7  | 60   | 80   | --         | --   |                       |                       |             |     |
| CakTSSR00241 | CakTC06068 | (CAA)5  | 38   | 52   | --         | --   |                       |                       |             |     |
| CakTSSR00242 | CakTC06087 | (AAC)5  | 71   | 85   | --         | --   |                       |                       |             |     |
| CakTSSR00243 | CakTC06104 | (AAG)6  | 512  | 529  | --         | --   | CGATCTGGTGAAGAAGAATAA | TCACAACCGTCCATTAGTATC | 54.63,55.1  | 148 |
| CakTSSR00244 | CakTC06127 | (CT)18  | 4    | 39   | --         | WRKY |                       |                       |             |     |
| CakTSSR00245 | CakTC06143 | (AG)7   | 351  | 364  | --         | --   | TCGATAAAGGAACAATGAAGA | AGTCACACCTTCAACACGATA | 55.05,55.68 | 163 |
| CakTSSR00246 | CakTC06143 | (GA)9   | 481  | 498  | --         | --   | ATATCGTGTGAAGGTGTGAC  | CGAGATCCTCTCTTCTTCTTC | 54.99,54.97 | 150 |
| CakTSSR00247 | CakTC06154 | (TC)11  | 11   | 32   | --         | HMG  |                       |                       |             |     |
| CakTSSR00248 | CakTC06186 | (TA)6   | 129  | 140  | --         | --   | AGAATTACAGTTTCCCCACTC | ATTTTCTTTCCCTAAAAGCTG | 54.9,54.7   | 167 |
| CakTSSR00249 | CakTC06190 | (TTA)7  | 12   | 32   | --         | --   |                       |                       |             |     |
| CakTSSR00250 | CakTC06196 | (GA)6   | 155  | 166  | --         | --   |                       |                       |             |     |
| CakTSSR00251 | CakTC06222 | (ACA)6  | 167  | 184  | --         | --   | ATATCCTCTCTCCAACCAGAA | TTGGAGTAAGGAAAGGAGACT | 55.39,54.79 | 175 |
| CakTSSR00252 | CakTC06248 | (GA)6   | 404  | 415  | --         | --   |                       |                       |             |     |
| CakTSSR00253 | CakTC06279 | (ATC)5  | 448  | 462  | --         | --   | TCTACTTCTCACACCCTTCA  | TTCCATCTCCGTGTATAAAA  | 55.01,54.94 | 149 |
| CakTSSR00254 | CakTC06417 | (TG)7   | 37   | 50   | --         | --   |                       |                       |             |     |
| CakTSSR00255 | CakTC06423 | (AAT)17 | 9    | 59   | --         | TPR  |                       |                       |             |     |

|              |            |        |      |      |    |      |                       |                        |             |     |
|--------------|------------|--------|------|------|----|------|-----------------------|------------------------|-------------|-----|
| CakTSSR00256 | CakTC06441 | (TGT)5 | 159  | 173  | -- | --   |                       |                        |             |     |
| CakTSSR00257 | CakTC06444 | (TCT)5 | 4    | 18   | -- | --   |                       |                        |             |     |
| CakTSSR00258 | CakTC06505 | (AT)6  | 2097 | 2108 | -- | --   | CCTTCCATCCTCATCAATAGT | GCTGAACTTTGTGGAAAATTA  | 55.68,54.73 | 157 |
| CakTSSR00259 | CakTC06505 | (AG)8  | 2345 | 2360 | -- | --   | TTATGGTGTGATTCAAAAACC | CCTTCTTTTCCACAATCTCT   | 55.08,55.2  | 136 |
| CakTSSR00260 | CakTC06592 | (TCA)5 | 1609 | 1623 | -- | --   | CACACTTCTTTCTCACACACA | GCCTATTTCACCAAATTTCTTT | 54.69,55.17 | 150 |
| CakTSSR00261 | CakTC06657 | (TTG)5 | 144  | 158  | -- | --   |                       |                        |             |     |
| CakTSSR00262 | CakTC06683 | (TTG)6 | 111  | 128  | -- | --   | ATTGATGCAACCAACACTTAT | TGAAATTCCTCAAGAAAGAGA  | 54.69,54.3  | 142 |
| CakTSSR00263 | CakTC06687 | (AT)9  | 338  | 355  | -- | --   |                       |                        |             |     |
| CakTSSR00264 | CakTC06702 | (AG)11 | 1603 | 1624 | -- | --   |                       |                        |             |     |
| CakTSSR00265 | CakTC06711 | (AG)8  | 94   | 109  | -- | --   |                       |                        |             |     |
| CakTSSR00266 | CakTC06715 | (TTA)8 | 1    | 24   | -- | --   |                       |                        |             |     |
| CakTSSR00267 | CakTC06720 | (GTT)5 | 134  | 148  | -- | --   | AGTTTTTCAGAAATGTGAGGA | TTGGAATGAACCATTTACTACA | 54.08,54.88 | 157 |
| CakTSSR00268 | CakTC06721 | (CT)6  | 26   | 37   | -- | --   |                       |                        |             |     |
| CakTSSR00269 | CakTC06728 | (CT)6  | 373  | 384  | -- | --   |                       |                        |             |     |
| CakTSSR00270 | CakTC06739 | (GAT)5 | 60   | 74   | -- | --   |                       |                        |             |     |
| CakTSSR00271 | CakTC06744 | (TCA)6 | 531  | 548  | -- | --   | GATCTCAAACTTTTCCCAAT  | GGCATGAAAATGTACTCAAGA  | 54.97,55.39 | 137 |
| CakTSSR00272 | CakTC06802 | (TC)7  | 76   | 89   | -- | --   |                       |                        |             |     |
| CakTSSR00273 | CakTC06806 | (ATA)6 | 1062 | 1079 | -- | --   | AAGGGACAAGGAGACACTTT  | GATCAACCTAGTGATTGTCAG  | 55.36,54.97 | 150 |
| CakTSSR00274 | CakTC06996 | (ATC)5 | 121  | 135  | -- | --   | ATTCTTCTCCTCTGCTCTTA  | TGCTGTATTTTTCTTTCTG    | 55.03,54.9  | 149 |
| CakTSSR00275 | CakTC07040 | (AGA)6 | 145  | 162  | -- | --   |                       |                        |             |     |
| CakTSSR00276 | CakTC07048 | (ATA)6 | 76   | 93   | -- | --   |                       |                        |             |     |
| CakTSSR00277 | CakTC07078 | (TA)6  | 229  | 240  | -- | --   |                       |                        |             |     |
| CakTSSR00278 | CakTC07091 | (TGT)7 | 526  | 546  | -- | --   | GAGAAATCTATGGAGGCAGAG | TTCAATGGCAATAGCAATAAC  | 55.71,55.52 | 155 |
| CakTSSR00279 | CakTC07109 | (CT)7  | 3    | 16   | -- | --   |                       |                        |             |     |
| CakTSSR00280 | CakTC07135 | (AT)6  | 138  | 149  | -- | --   |                       |                        |             |     |
| CakTSSR00281 | CakTC07300 | (ATC)5 | 219  | 233  | -- | --   | ATCATTTCATCAATCAGCATC | AGATCGATGGATAGGAAAAAG  | 55.05,55.09 | 180 |
| CakTSSR00282 | CakTC07315 | (TCA)5 | 783  | 797  | -- | --   | AAGTTTCAACCCATCTTCATT | GATTGCCTAGTTGAGAAAA    | 55.31,54.7  | 155 |
| CakTSSR00283 | CakTC07323 | (TTC)7 | 1354 | 1374 | -- | --   | GTTCTTGTTTTTCGAATGATG | CAACCTAAAGATGAAGTCGAA  | 54.96,54.72 | 149 |
| CakTSSR00284 | CakTC07342 | (GA)9  | 1058 | 1075 | -- | --   |                       |                        |             |     |
| CakTSSR00285 | CakTC07365 | (TC)6  | 86   | 97   | -- | --   |                       |                        |             |     |
| CakTSSR00286 | CakTC07377 | (CT)8  | 33   | 48   | -- | bHLH |                       |                        |             |     |
| CakTSSR00287 | CakTC07377 | (ATT)5 | 662  | 676  | -- | bHLH | GAGGAACCATTTTCTTTCTTC | AAAAACCTTCTCATTGTGTT   | 54.69,55.38 | 167 |
| CakTSSR00288 | CakTC07403 | (AG)9  | 2388 | 2405 | -- | EIL  |                       |                        |             |     |
| CakTSSR00289 | CakTC07489 | (AGA)9 | 122  | 148  | -- | --   |                       |                        |             |     |
| CakTSSR00290 | CakTC07556 | (GAA)7 | 2559 | 2579 | -- | --   | ACCAAAAGGGTCAATTTCTAT | AGAGAAGCTGGTTTTTCAAGT  | 54.48,55.02 | 144 |
| CakTSSR00291 | CakTC07557 | (GAA)8 | 30   | 53   | -- | --   |                       |                        |             |     |
| CakTSSR00292 | CakTC07561 | (TC)8  | 20   | 35   | -- | --   |                       |                        |             |     |

|              |            |         |      |      |            |       |                        |                        |             |     |
|--------------|------------|---------|------|------|------------|-------|------------------------|------------------------|-------------|-----|
| CakTSSR00293 | CakTC07582 | (TA)6   | 733  | 744  | --         | --    |                        |                        |             |     |
| CakTSSR00294 | CakTC07598 | (TTC)5  | 1575 | 1589 | --         | --    | TTTCAACGATTCTTCTTCAAC  | GTTTTAGAACAACCACAACCA  | 54.67,55.23 | 150 |
| CakTSSR00295 | CakTC07598 | (TGT)5  | 1982 | 1996 | --         | --    | GGGAAGAATGAGGTAGTAGGA  | GTCTCGATCCAAACAACAAC   | 54.99,55.54 | 160 |
| CakTSSR00296 | CakTC07648 | (ATT)5  | 2827 | 2841 | --         | C3H   | TGCATACTTTCAAAAGCAGTT  | TTAACCTGTGGTTCAGCTTAC  | 55.39,54.66 | 149 |
| CakTSSR00297 | CakTC07649 | (GCA)6  | 2647 | 2664 | --         | --    | AGGGTTTACAATGAATGAATG  | ACACAAGATTCAACCTTTTCA  | 54.2,54.85  | 155 |
| CakTSSR00298 | CakTC07653 | (TTA)5  | 245  | 259  | --         | --    | GTTAGCCAAATAAACACATTT  | TGGTTGACTAATAACTTGTGGA | 55.15,54.94 | 139 |
| CakTSSR00299 | CakTC07661 | (TC)8   | 37   | 52   | --         | ARR-B |                        |                        |             |     |
| CakTSSR00300 | CakTC07724 | (AG)10  | 1    | 20   | --         | --    |                        |                        |             |     |
| CakTSSR00301 | CakTC07724 | (TC)8   | 259  | 274  | --         | --    | TTCTTTTCCAGTCCCTAATC   | TTGTTGTTGTTGGTGTCTGTA  | 55.13,55.04 | 136 |
| CakTSSR00302 | CakTC07775 | (CTT)6  | 592  | 609  | --         | --    | TGAAATGTTGTTAGCTTCCAT  | AACCTGGAGTTCTTGTGAAGT  | 54.99,55.45 | 157 |
| CakTSSR00303 | CakTC07782 | (TTG)6  | 628  | 645  | --         | --    | CAGGTTCTAATCTACCTGCT   | GTGTAAAGCCATGGAAGAGAT  | 55.26,55.9  | 152 |
| CakTSSR00304 | CakTC07784 | (GA)13  | 344  | 369  | --         | --    | CCTTCAAGATACGTTTCGAC   | ACCATTCTTTCTGATTTTCC   | 54.96,54.97 | 160 |
| CakTSSR00305 | CakTC07813 | (TTGT)5 | 2571 | 2590 | --         | --    |                        |                        |             |     |
| CakTSSR00306 | CakTC07838 | (GAA)7  | 225  | 245  | --         | bHLH  | AGAATAGAAAACGGCAATGTT  | AGTGATTCTCTGTGTCTCTGC  | 55.65,54.51 | 155 |
| CakTSSR00307 | CakTC07885 | (TGT)6  | 310  | 327  | --         | SBP   | GTGCTGTTGTTGTTGTGTTG   | AAGCTTCTTCTTAAACCAAA   | 54.92,55.14 | 153 |
| CakTSSR00308 | CakTC07892 | (TGT)5  | 2920 | 2934 | --         | --    | AATATCGTAGCTTCGAAAACC  | CCAGATAGCTTTCATTACTCC  | 55.35,54.95 | 162 |
| CakTSSR00309 | CakTC07909 | (AG)11  | 3655 | 3676 | --         | --    |                        |                        |             |     |
| CakTSSR00310 | CakTC07970 | (TTA)8  | 738  | 761  | --         | C3H   | TGATGATTATTTTCGTTTCCTC | GCAACTAGAAAGACGCTGATAA | 54.4,55.06  | 152 |
| CakTSSR00311 | CakTC07975 | (AAC)5  | 477  | 491  | --         | --    | ACTCAAAAATCACACCTTTCA  | ACACCAACAACATTAACAACC  | 54.85,54.93 | 145 |
| CakTSSR00312 | CakTC07988 | (GAA)5  | 2332 | 2346 | --         | --    |                        |                        |             |     |
| CakTSSR00313 | CakTC07994 | (GGT)5  | 3050 | 3064 | --         | --    | TCTTGCTTTAGAATGTTTCGAT | AGAAATCGCGTTATTGGTAAT  | 54.4,55.61  | 148 |
| CakTSSR00314 | CakTC08000 | (TCC)8  | 1735 | 1758 | --         | --    |                        |                        |             |     |
| CakTSSR00315 | CakTC08008 | (GA)6   | 6351 | 6362 | --         | SET   |                        |                        |             |     |
| CakTSSR00316 | CakTC08058 | (ATT)5  | 763  | 777  | --         | --    | TTCTCAATGACTGTTGGTTTT  | GTGATTCACCTCAAACCTCAA  | 54.85,55.26 | 157 |
| CakTSSR00317 | CakTC08067 | (TA)7   | 6    | 19   | --         | --    |                        |                        |             |     |
| CakTSSR00318 | CakTC08071 | (ATT)6  | 167  | 184  | --         | --    | ATTAAGGGTATTGGGGTCTT   | GAACGTGTGAAAGAGAAACAG  | 55.76,55.08 | 148 |
| CakTSSR00319 | CakTC08075 | (TCA)6  | 1670 | 1687 | --         | --    | ATCAACCTCATTAAATGTCTG  | GCTACAGAGACTTCCTTCCTC  | 55.1,54.92  | 154 |
| CakTSSR00320 | CakTC08132 | (TTC)5  | 257  | 271  | --         | --    | ACAAATCTGTGTGTTTCCA    | CTGAGGAAGATGAAGAGGACT  | 55.64,55.17 | 154 |
| CakTSSR00321 | CakTC08174 | (AT)6   | 44   | 55   | --         | --    |                        |                        |             |     |
| CakTSSR00322 | CakTC08175 | (GAT)6  | 1644 | 1661 | Flower bud | --    | ATGAAGATACAGAGCCAAGT   | TCACATTGCATACTTTGGAT   | 55.49,55.68 | 150 |
| CakTSSR00323 | CakTC08181 | (TGT)5  | 28   | 42   | --         | NAC   |                        |                        |             |     |
| CakTSSR00324 | CakTC08199 | (AGG)5  | 304  | 318  | --         | --    | GGTGAAAGTGTAATGCAAAG   | ATTAACGCCAATTCTTTACT   | 55.07,54.84 | 147 |
| CakTSSR00325 | CakTC08202 | (GA)6   | 3776 | 3787 | --         | --    |                        |                        |             |     |
| CakTSSR00326 | CakTC08203 | (CT)9   | 81   | 98   | --         | --    |                        |                        |             |     |
| CakTSSR00327 | CakTC08214 | (TGA)28 | 133  | 216  | --         | --    | GATGATGATGGTGATGATGA   | GAGCAACAAATTGAGAGAGAA  | 54.8,54.8   | 150 |
| CakTSSR00328 | CakTC08216 | (CA)6   | 277  | 288  | --         | bZIP  | CCAAATCAAGAATCATGTAGC  | TGTGTCAAAAAGTTGAGTGTG  | 54.91,54.73 | 126 |
| CakTSSR00329 | CakTC08232 | (TGC)5  | 684  | 698  | --         | --    | TAGTGAGTTGGTTGAAGCAGT  | TGCGTCTAAATGAAGAGAAAG  | 55.12,55.04 | 170 |

|              |            |        |      |      |            |          |                        |                         |             |     |
|--------------|------------|--------|------|------|------------|----------|------------------------|-------------------------|-------------|-----|
| CakTSSR00330 | CakTC08240 | (TGA)5 | 2490 | 2504 | --         | --       | GACAGTTATGCAGCTTTCAC   | CAGAAGATGTTCAATCCATGT   | 54.78,55.05 | 150 |
| CakTSSR00331 | CakTC08246 | (ATG)6 | 1834 | 1851 | --         | --       | TGAGTCCGATCTGAGAATAGA  | CAAACTCTTAATGCCAACAAATG | 55.01,55.84 | 147 |
| CakTSSR00332 | CakTC08250 | (ACA)6 | 228  | 245  | --         | Trihelix | TCTAAAGTTTCTTCCTTTTCG  | GTGAGGATTTTGTGTAATTG    | 54.91,54.79 | 158 |
| CakTSSR00333 | CakTC08250 | (AAC)6 | 416  | 433  | --         | Trihelix | ACTGACAACAACACACATCAA  | TGGCTCATCTTCATCACTAAG   | 54.82,55.56 | 144 |
| CakTSSR00334 | CakTC08270 | (TG)10 | 308  | 327  | --         | --       | CGACTTCTTGAATTTATGTGG  | CTAGGAAAGGTACAAAAGCAA   | 55,54.14    | 160 |
| CakTSSR00335 | CakTC08279 | (TG)7  | 302  | 315  | --         | --       |                        |                         |             |     |
| CakTSSR00336 | CakTC08287 | (ATG)6 | 2572 | 2589 | --         | --       |                        |                         |             |     |
| CakTSSR00337 | CakTC08318 | (GA)8  | 3613 | 3628 | --         | --       |                        |                         |             |     |
| CakTSSR00338 | CakTC08324 | (GA)7  | 4    | 17   | --         | --       |                        |                         |             |     |
| CakTSSR00339 | CakTC08339 | (TC)10 | 3762 | 3781 | --         | --       | ATGCCTTGCTCAGAGATTC    | ATCACTACACACCCGTCTCT    | 55.43,54.6  | 157 |
| CakTSSR00340 | CakTC08400 | (ACT)6 | 947  | 964  | Flower bud | --       | AAAGCTCTCACCTCGTACTCT  | AGTTGTTGTTGAACATTACCG   | 55.03,55.26 | 168 |
| CakTSSR00341 | CakTC08416 | (TGT)6 | 1430 | 1447 | --         | --       |                        |                         |             |     |
| CakTSSR00342 | CakTC08458 | (TGA)5 | 73   | 87   | --         | TRAF     |                        |                         |             |     |
| CakTSSR00343 | CakTC08458 | (TTA)6 | 1525 | 1542 | --         | TRAF     |                        |                         |             |     |
| CakTSSR00344 | CakTC08487 | (CAG)6 | 1221 | 1238 | --         | NAC      | CCAATCCAATCTCAACTATCA  | TCCACTTCCACCTATTTTATG   | 55.16,54.38 | 149 |
| CakTSSR00345 | CakTC08487 | (AAC)5 | 1551 | 1565 | --         | NAC      | CTATACACTTCGGTGCTTCTC  | GAGAGTCTTAGGTCGTCTCC    | 54.32,54.75 | 151 |
| CakTSSR00346 | CakTC08489 | (ATT)6 | 730  | 747  | --         | TCP      | GTCCCCCTCTGTGAAAGATACT | CCGGTGTACTATTGATACTG    | 54.88,55.07 | 162 |
| CakTSSR00347 | CakTC08489 | (TTC)5 | 1465 | 1479 | --         | TCP      | ATCCAGACTCGGACACTTTAT  | ACTTTCATTTTCCACTTTGG    | 55.33,55.94 | 147 |
| CakTSSR00348 | CakTC08490 | (AG)8  | 2839 | 2854 | --         | --       |                        |                         |             |     |
| CakTSSR00349 | CakTC08495 | (TG)6  | 345  | 356  | --         | --       | TAGAGCTGGAAGGAGTATGTG  | ACCCTCTTACTTCAATTGGTC   | 54.72,54.9  | 127 |
| CakTSSR00350 | CakTC08510 | (AG)6  | 184  | 195  | --         | HB       | AATCACACATCCTTCTCACAA  | CAAAAACAAACGAAGAAGAAG   | 55.56,54.55 | 149 |
| CakTSSR00351 | CakTC08529 | (TGT)5 | 1623 | 1637 | --         | --       | CCAGATGGAATTAGATCCTTT  | TCAAAGAGAGAGAAAAAGCAA   | 54.93,54.72 | 151 |
| CakTSSR00352 | CakTC08531 | (ATT)7 | 52   | 72   | --         | --       |                        |                         |             |     |
| CakTSSR00353 | CakTC08548 | (TC)7  | 66   | 79   | --         | --       |                        |                         |             |     |
| CakTSSR00354 | CakTC08548 | (CAA)6 | 421  | 438  | --         | --       | CATAAAACCAAACCTCAACCAC | CTCTCCCCACTGTATGAGAC    | 54.75,54.56 | 167 |
| CakTSSR00355 | CakTC08583 | (GA)6  | 1    | 12   | --         | --       |                        |                         |             |     |
| CakTSSR00356 | CakTC08597 | (TA)8  | 22   | 37   | --         | --       |                        |                         |             |     |
| CakTSSR00357 | CakTC08611 | (TTC)6 | 111  | 128  | --         | --       | AATCAAAACAACACTTCCTTG  | GAATCTTGATCAGAAAGCAAA   | 54.46,54.74 | 162 |
| CakTSSR00358 | CakTC08639 | (GA)14 | 3512 | 3539 | --         | CAMTA    | AGTCAATCCGTAAGAAGAAGC  | ATAGCGAAAAACAACGAAACA   | 55.37,55.23 | 160 |
| CakTSSR00359 | CakTC08658 | (GA)18 | 432  | 467  | --         | --       | GCATTTTAAACTTCACCTTG   | CTCACTCAGTCAGTTTACCC    | 54.36,53.99 | 158 |
| CakTSSR00360 | CakTC08661 | (TC)6  | 570  | 581  | --         | --       | TGCATCTCTCTGAATTTGAT   | ATGGTTTGGAGATGGATAAT    | 55.02,55.04 | 140 |
| CakTSSR00361 | CakTC08663 | (TCT)5 | 344  | 358  | --         | --       | AACATATGCATTCCCTACCTC  | GGTTCAATCCACATTCATAGA   | 55.7,54.98  | 150 |
| CakTSSR00362 | CakTC08673 | (AG)7  | 1790 | 1803 | --         | --       |                        |                         |             |     |
| CakTSSR00363 | CakTC08719 | (TC)9  | 4199 | 4216 | --         | --       |                        |                         |             |     |
| CakTSSR00364 | CakTC08729 | (CGA)5 | 408  | 422  | --         | --       | GTCACAGTTTTCATCATCCAC  | AAATCCGATGACGAAGAGTAG   | 55.38,56.06 | 146 |
| CakTSSR00365 | CakTC08732 | (AAG)5 | 3121 | 3135 | --         | --       |                        |                         |             |     |
| CakTSSR00366 | CakTC08743 | (CCA)5 | 719  | 733  | --         | --       | TGAGGAAAGGTTTTCATACAA  | CAGACTTGGAGAAGCTTATGA   | 54.97,54.85 | 160 |

|              |            |           |      |      |             |        |                       |                        |             |     |
|--------------|------------|-----------|------|------|-------------|--------|-----------------------|------------------------|-------------|-----|
| CakTSSR00367 | CakTC08743 | (GA)7     | 2011 | 2024 | --          | --     |                       |                        |             |     |
| CakTSSR00368 | CakTC08782 | (TC)21    | 17   | 58   | --          | --     |                       |                        |             |     |
| CakTSSR00369 | CakTC08807 | (ATC)5    | 1365 | 1379 | --          | --     | GATGAAGACGAAGACACAAGA | AAGTGGGTATGATGATTGTG   | 55.42,54.93 | 139 |
| CakTSSR00370 | CakTC08807 | (ATAA)5   | 1959 | 1978 | --          | --     | CAAAACAAACCTAGTTTCA   | TTTTCAGGGTAGGATAAAACC  | 54.67,55.03 | 149 |
| CakTSSR00371 | CakTC08807 | (GAA)8    | 2217 | 2240 | --          | --     |                       |                        |             |     |
| CakTSSR00372 | CakTC08812 | (GGT)5    | 438  | 452  | --          | --     |                       |                        |             |     |
| CakTSSR00373 | CakTC08817 | (GAA)5    | 3599 | 3613 | --          | --     | CAAAAAGATGGTCAGTGAAAC | TCTTTCTCTGTTTGAATGGA   | 54.85,55.08 | 158 |
| CakTSSR00374 | CakTC08832 | (CTT)8    | 294  | 317  | --          | --     | GGCTCTGGAAATTTAAACAA  | AATTCCAAGACAAAGTCCAT   | 54.64,55.31 | 209 |
| CakTSSR00375 | CakTC08847 | (TTA)6    | 359  | 376  | --          | --     | TGTTGGTTTACCAAAATGAG  | ATCTTCTTCTGTTTGCATGA   | 55.33,55.1  | 146 |
| CakTSSR00376 | CakTC08855 | (GAA)6    | 2749 | 2766 | --          | --     | CTGTAGGTGAGGAGATGAAGA | GAAATGTATCACCTTTGTGA   | 54.48,55.06 | 150 |
| CakTSSR00377 | CakTC08877 | (ACA)5    | 1    | 15   | --          | --     |                       |                        |             |     |
| CakTSSR00378 | CakTC08885 | (ATC)6    | 284  | 301  | --          | --     | ATTCCTTGAATCACTTTCTC  | GAGGTGAAGGAAAGTGGTAAT  | 54.95,54.9  | 159 |
| CakTSSR00379 | CakTC08892 | (AAT)5    | 481  | 495  | --          | --     | GGGGTACCCTTTATAGAGACA | TAAACCAATCAAAACAAAGGTG | 54.89,55.33 | 147 |
| CakTSSR00380 | CakTC08897 | (AT)7     | 29   | 42   | Mature Leaf | --     |                       |                        |             |     |
| CakTSSR00381 | CakTC08924 | (TCCTCT)9 | 2364 | 2417 | --          | --     | CATTGTGTGTCATCTTCACCT | TCAAAGTGATCTGATGGATTC  | 55.05,55.09 | 152 |
| CakTSSR00382 | CakTC08958 | (TIG)5    | 389  | 403  | --          | --     |                       |                        |             |     |
| CakTSSR00383 | CakTC09005 | (GA)10    | 1920 | 1939 | --          | --     |                       |                        |             |     |
| CakTSSR00384 | CakTC09007 | (TC)6     | 2859 | 2870 | Flower bud  | --     | GTTCAGTCAACTTTCGTGTTT | AAGGGAGAGACAAGTGAAGAG  | 54.9,55.25  | 152 |
| CakTSSR00385 | CakTC09026 | (TGT)5    | 515  | 529  | --          | --     | GCACACTATTCCAAGAACAAG | GTACCAACGGTTTCATCTTC   | 55.05,54.61 | 150 |
| CakTSSR00386 | CakTC09031 | (AC)6     | 6    | 17   | --          | --     |                       |                        |             |     |
| CakTSSR00387 | CakTC09046 | (AT)6     | 283  | 294  | --          | NOZZLE | AGCTGGACTTAAAGTTGACC  | CAACCTTTGTACAGCTTCATT  | 55.3,54.66  | 150 |
| CakTSSR00388 | CakTC09051 | (AG)7     | 2012 | 2025 | --          | --     |                       |                        |             |     |
| CakTSSR00389 | CakTC09062 | (GAT)6    | 540  | 557  | --          | --     | AGAAAAAGGCATCCAATTAAG | TGCTGAGAATCAACTTCAAAT  | 55.33,55.1  | 168 |
| CakTSSR00390 | CakTC09068 | (GAA)6    | 510  | 527  | --          | --     | AAGGGATGATTGAATAAAGG  | TAACCTCAGCTCCACATTTAC  | 54.95,54.58 | 160 |
| CakTSSR00391 | CakTC09109 | (GAA)7    | 323  | 343  | --          | --     | TATCCTCTAGGGAAACACCTC | ATTTGAAGCTGTTCTGTGAA   | 54.99,55.18 | 152 |
| CakTSSR00392 | CakTC09122 | (TC)11    | 67   | 88   | --          | --     |                       |                        |             |     |
| CakTSSR00393 | CakTC09132 | (GT)6     | 583  | 594  | --          | --     | AATAAACATAGCCCTTTGAGG | GTCAGCCTGTTGTACATGAAT  | 55.21,55.16 | 141 |
| CakTSSR00394 | CakTC09170 | (AG)6     | 76   | 87   | --          | --     |                       |                        |             |     |
| CakTSSR00395 | CakTC09181 | (TCT)5    | 116  | 130  | --          | --     | CTTCGTGACTGTGACTTTCTT | GGAATTAAAGCATTGACTGAG  | 54.65,54.24 | 149 |
| CakTSSR00396 | CakTC09190 | (TC)6     | 1    | 12   | --          | --     |                       |                        |             |     |
| CakTSSR00397 | CakTC09191 | (TA)10    | 1413 | 1432 | --          | --     |                       |                        |             |     |
| CakTSSR00398 | CakTC09209 | (TA)6     | 1287 | 1298 | --          | --     |                       |                        |             |     |
| CakTSSR00399 | CakTC09211 | (AAG)5    | 85   | 99   | --          | --     |                       |                        |             |     |
| CakTSSR00400 | CakTC09265 | (TC)10    | 739  | 758  | Flower bud  | --     | CCATTTCTTTGGCATATTGTA | CTTGCATACACAACGTGAATA  | 55.37,54.85 | 147 |
| CakTSSR00401 | CakTC09285 | (AAAG)5   | 77   | 96   | Young_pod   | --     |                       |                        |             |     |
| CakTSSR00402 | CakTC09296 | (GA)12    | 1069 | 1092 | --          | --     |                       |                        |             |     |
| CakTSSR00403 | CakTC09333 | (CA)6     | 1181 | 1192 | --          | --     | AATTAGCATAGTTCAGCACCA | TGTAGTTCATTTCTGTCTGGA  | 55.18,55.04 | 143 |

|              |            |           |      |      |    |      |                       |                        |             |     |
|--------------|------------|-----------|------|------|----|------|-----------------------|------------------------|-------------|-----|
| CakTSSR00404 | CakTC09341 | (AATGTG)5 | 647  | 676  | -- | --   | GGGTTATGTTACCAACTGTGA | TCACTCTTTCCAATTCTCAAA  | 55.02,55.08 | 176 |
| CakTSSR00405 | CakTC09352 | (CT)9     | 1    | 18   | -- | --   |                       |                        |             |     |
| CakTSSR00406 | CakTC09355 | (CAC)7    | 371  | 391  | -- | --   | TTAATAGCCAATTCCTTCTC  | GGAAGAGAAAATTCAACATGA  | 55.25,54.42 | 159 |
| CakTSSR00407 | CakTC09374 | (CT)9     | 63   | 80   | -- | --   |                       |                        |             |     |
| CakTSSR00408 | CakTC09375 | (TC)8     | 110  | 125  | -- | --   | TATCTTTCCACCAACAAAT   | TGATTGAAATAAGCACCCATA  | 54.67,55.77 | 150 |
| CakTSSR00409 | CakTC09397 | (TTC)6    | 220  | 237  | -- | --   | GTGTCTCTGACCTTAAACGA  | ATGATGGAAATGAAAGGAAGT  | 54.59,55.23 | 150 |
| CakTSSR00410 | CakTC09425 | (ATG)6    | 1521 | 1538 | -- | --   |                       |                        |             |     |
| CakTSSR00411 | CakTC09477 | (CCA)6    | 1175 | 1192 | -- | bZIP | GAACATTGTGAGAAAACATGG | AGTGACTCTATTGCCTTCCTC  | 55.56,55.21 | 136 |
| CakTSSR00412 | CakTC09505 | (CAC)5    | 546  | 560  | -- | --   | CAACTCCTCCACCATGTC    | GATAGGAACATCTCAATGTCG  | 54.45,54.72 | 149 |
| CakTSSR00413 | CakTC09550 | (TC)7     | 22   | 35   | -- | --   |                       |                        |             |     |
| CakTSSR00414 | CakTC09552 | (TC)7     | 8    | 21   | -- | --   |                       |                        |             |     |
| CakTSSR00415 | CakTC09555 | (CTT)7    | 170  | 190  | -- | --   | AGAGAAGCTGGTTTTCAAGT  | ACCAAAAGGGTCAATTTCTAT  | 55.02,54.48 | 144 |
| CakTSSR00416 | CakTC09562 | (AG)11    | 1205 | 1226 | -- | --   | GGGAAGTAGTTGAGAACCTGT | GAGAATCGAAGTGATGCTCT   | 54.96,54.52 | 134 |
| CakTSSR00417 | CakTC09575 | (GAT)5    | 1126 | 1140 | -- | --   | TCAGATTGATTTAGTTGCACA | TCCAAAACAAACAGTAAGCAT  | 54.42,55.07 | 148 |
| CakTSSR00418 | CakTC09584 | (CT)17    | 114  | 147  | -- | --   | CAAGTGTTCTCATTTCTTCG  | AGCTGAGTAAAAATCATCGTG  | 55.19,54.74 | 160 |
| CakTSSR00419 | CakTC09585 | (ATA)8    | 1556 | 1579 | -- | --   |                       |                        |             |     |
| CakTSSR00420 | CakTC09601 | (CTT)5    | 2713 | 2727 | -- | --   | TCCCATGTCAGTTTCTGTTAC | CAAAGTTAAGTGCTGCTGAGT  | 55.13,55.04 | 152 |
| CakTSSR00421 | CakTC09611 | (AG)6     | 598  | 609  | -- | --   |                       |                        |             |     |
| CakTSSR00422 | CakTC09612 | (AT)8     | 3129 | 3144 | -- | --   |                       |                        |             |     |
| CakTSSR00423 | CakTC09637 | (AT)7     | 1638 | 1651 | -- | --   |                       |                        |             |     |
| CakTSSR00424 | CakTC09645 | (CT)18    | 1    | 36   | -- | --   |                       |                        |             |     |
| CakTSSR00425 | CakTC09653 | (GATAGA)5 | 240  | 269  | -- | --   | ATAGGGTTGAAGATGATGGTT | CCTATCCCTATCCCTTTCTCT  | 55.11,55.58 | 182 |
| CakTSSR00426 | CakTC09669 | (TGT)5    | 245  | 259  | -- | --   | TGAAGTGGTTTCTGAGTTGTT | ATTC AACCTCACAGTTTCAGA | 54.92,54.83 | 151 |
| CakTSSR00427 | CakTC09676 | (TC)8     | 26   | 41   | -- | --   |                       |                        |             |     |
| CakTSSR00428 | CakTC09678 | (TCAC)9   | 1204 | 1239 | -- | --   | TGTAGACGAAGTTTTCACGAT | GAGACGGATGAGAGTGAGAG   | 55.05,54.85 | 153 |
| CakTSSR00429 | CakTC09692 | (GA)6     | 806  | 817  | -- | --   | AAGGGAGAGACAAGTGAAGAG | GTTCACTCAACTTTCGTGTTTC | 55.25,54.9  | 152 |
| CakTSSR00430 | CakTC09700 | (CA)6     | 1308 | 1319 | -- | --   |                       |                        |             |     |
| CakTSSR00431 | CakTC09706 | (TC)6     | 5    | 16   | -- | --   |                       |                        |             |     |
| CakTSSR00432 | CakTC09712 | (GCT)5    | 1588 | 1602 | -- | --   | GGAGTGCTGCTGTAGTAATG  | CTTCAACATTTTCTCTCCAT   | 55.25,55.88 | 144 |
| CakTSSR00433 | CakTC09715 | (GA)7     | 1939 | 1952 | -- | --   |                       |                        |             |     |
| CakTSSR00434 | CakTC09739 | (TGC)6    | 209  | 226  | -- | --   | ACACAAGATTCAACCTTTTCA | AGGGTTTACAATGAATGAATG  | 54.85,54.2  | 155 |
| CakTSSR00435 | CakTC09746 | (AAG)5    | 60   | 74   | -- | --   |                       |                        |             |     |
| CakTSSR00436 | CakTC09763 | (TC)7     | 10   | 23   | -- | --   |                       |                        |             |     |
| CakTSSR00437 | CakTC09779 | (CTT)6    | 1340 | 1357 | -- | --   | AAATCACCTAGGTTTGGTTC  | TTCTGAAGTTGAAAAAGTGA   | 54.92,55.16 | 144 |
| CakTSSR00438 | CakTC09793 | (CT)10    | 1424 | 1443 | -- | --   | GAGCGAGTTTGAGAAATGATA | TTTGGGGATTAATTGATGAT   | 54.78,54.43 | 155 |
| CakTSSR00439 | CakTC09794 | (CT)11    | 1435 | 1456 | -- | --   | GAGCGAGTTTGAGAAATGATA | AGCTATGAGGAGAAACGAAAT  | 54.78,54.91 | 148 |
| CakTSSR00440 | CakTC09795 | (TCT)6    | 49   | 66   | -- | C2H2 |                       |                        |             |     |

|              |            |           |      |      |           |          |                       |                       |             |     |
|--------------|------------|-----------|------|------|-----------|----------|-----------------------|-----------------------|-------------|-----|
| CakTSSR00441 | CakTC09810 | (ACA)5    | 71   | 90   | --        | --       |                       |                       |             |     |
| CakTSSR00442 | CakTC09821 | (TC)11    | 1559 | 1580 | --        | --       |                       |                       |             |     |
| CakTSSR00443 | CakTC09822 | (AGA)6    | 2868 | 2885 | --        | --       |                       |                       |             |     |
| CakTSSR00444 | CakTC09824 | (TTC)7    | 536  | 556  | --        | --       | TTGATTTCATATTCCATCCAC | CAGAGAAGAATGAGGATGATG | 54.92,54.84 | 144 |
| CakTSSR00445 | CakTC09827 | (ATG)5    | 2318 | 2332 | --        | --       | TCAACCATTTCTCAGACTTGT | AGATTGAATCATCATCACCAC | 54.83,54.77 | 147 |
| CakTSSR00446 | CakTC09844 | (GGA)5    | 1856 | 1870 | --        | --       | AGATGTTCCAATTCCTTCTGT | TTGTTCCACAGTTTCTCTGTA | 55.3,55.81  | 153 |
| CakTSSR00447 | CakTC09856 | (GAAGA)6  | 7    | 36   | --        | --       |                       |                       |             |     |
| CakTSSR00448 | CakTC09857 | (GAA)6    | 2695 | 2712 | --        | --       | TGTAGGTGAGGAGATGAAGAG | GAAATGTATCACCCTTTGTGA | 54.48,55.06 | 150 |
| CakTSSR00449 | CakTC09870 | (TAT)7    | 1647 | 1667 | --        | --       |                       |                       |             |     |
| CakTSSR00450 | CakTC09873 | (GAA)5    | 1187 | 1201 | --        | --       | GGTTCAATCCACATTCATAGA | AACATATGCATTCCCTACCTC | 54.98,55.7  | 150 |
| CakTSSR00451 | CakTC09874 | (GAT)7    | 1041 | 1061 | --        | --       | AAGGAGAGAAACCTAAGTTG  | GTTTCCCTTTTCATTCTTCT  | 54.42,54.97 | 149 |
| CakTSSR00452 | CakTC09874 | (GA)8     | 1242 | 1257 | --        | --       | GGAAACAACAGAATACAGCAC | GTAGTAGTGCTCCACAAATGC | 54.88,55.08 | 155 |
| CakTSSR00453 | CakTC09877 | (CT)9     | 1062 | 1079 | --        | --       | CTTGAAGAAATTCAGACCTT  | GGTTGTGACTTGTGAGTTGTT | 55.2,55.1   | 148 |
| CakTSSR00454 | CakTC09878 | (TCT)5    | 104  | 118  | --        | --       | CTTCGTGACTGTGACTTTCTT | GGAATTAAGCATTGACTGAG  | 54.65,54.24 | 149 |
| CakTSSR00455 | CakTC09896 | (CAA)5    | 223  | 237  | --        | --       | GTAGCTTCTGAATCAAACACG | ACCTTTGAGTAACCCTTGAAC | 55.22,54.98 | 169 |
| CakTSSR00456 | CakTC09899 | (TA)8     | 119  | 134  | --        | --       | CAITCCCTTCACCTCTAATTT | CTAGGTTAAAAGCCAGGAATC | 55.01,54.94 | 152 |
| CakTSSR00457 | CakTC09918 | (TTA)5    | 914  | 928  | --        | --       |                       |                       |             |     |
| CakTSSR00458 | CakTC09920 | (TC)10    | 3377 | 3396 | --        | --       |                       |                       |             |     |
| CakTSSR00459 | CakTC09923 | (AAG)5    | 42   | 56   | --        | --       |                       |                       |             |     |
| CakTSSR00460 | CakTC09927 | (CTG)5    | 468  | 482  | --        | --       | TGAAACAACATTCTTCTCC   | ACTGAGAGACTTGGATTTCC  | 54.5,55.01  | 150 |
| CakTSSR00461 | CakTC09934 | (ATT)6    | 440  | 457  | --        | Trihelix | CCTCTTGCATTCTCTTGTA   | TTGGCATTGATAAACCTAAAG | 54.88,54.72 | 159 |
| CakTSSR00462 | CakTC09934 | (TCA)6    | 1152 | 1169 | --        | Trihelix | AACACTTGAACATTTCAAACC | ATGGTGATGTTGTACCAAAG  | 54.28,55.02 | 153 |
| CakTSSR00463 | CakTC09936 | (CAG)6    | 1200 | 1217 | --        | NAC      | TTCCAAATCCAATCTCAACTA | CTTCCACTTCCACCTATTTT  | 54.89,55.09 | 155 |
| CakTSSR00464 | CakTC09936 | (AAAGAG)5 | 1364 | 1393 | --        | NAC      | TGCACATCATCTTCTCTGAT  | TCATCATGACACAGAAAACAA | 55.82,55    | 165 |
| CakTSSR00465 | CakTC09936 | (AAC)5    | 1682 | 1696 | --        | NAC      | CTATACACTTCGGTGCTTCTC | GAGAGTCTTAGGTCGTTCTCC | 54.32,54.75 | 150 |
| CakTSSR00466 | CakTC09942 | (AG)12    | 1    | 24   | --        | --       |                       |                       |             |     |
| CakTSSR00467 | CakTC09965 | (AAG)6    | 291  | 308  | --        | --       | CACAGAACAAGAACAACACA  | CAGACTGAAAAGTTCGTGTC  | 54.73,55.08 | 153 |
| CakTSSR00468 | CakTC09966 | (CAA)5    | 661  | 675  | --        | --       |                       |                       |             |     |
| CakTSSR00469 | CakTC09971 | (TC)7     | 9    | 22   | --        | --       |                       |                       |             |     |
| CakTSSR00470 | CakTC09974 | (TTCACA)7 | 58   | 99   | Young_pod | --       |                       |                       |             |     |
| CakTSSR00471 | CakTC09982 | (AG)8     | 2138 | 2153 | --        | ARR-B    | GAAGTTCTGCCACTGAGTTC  | TTAGGAACAGCCTTGCAAT   | 54.95,54.96 | 153 |
| CakTSSR00472 | CakTC09997 | (AG)6     | 80   | 91   | --        | --       |                       |                       |             |     |
| CakTSSR00473 | CakTC09997 | (AGA)5    | 341  | 355  | --        | --       | GATGAAACTCAACAGAGTTGG | AGTAACAAAACCAGCAACAAA | 54.83,55.15 | 153 |
| CakTSSR00474 | CakTC10012 | (AG)8     | 2073 | 2088 | --        | --       |                       |                       |             |     |
| CakTSSR00475 | CakTC10014 | (TCA)6    | 580  | 597  | --        | --       | GATCTCAAACTTTTCCAAT   | GGCATGAAAATGTACTCAAGA | 54.97,55.39 | 137 |
| CakTSSR00476 | CakTC10023 | (GGT)5    | 61   | 75   | --        | --       |                       |                       |             |     |
| CakTSSR00477 | CakTC10026 | (AGT)5    | 3490 | 3504 | --        | --       | AGAGAGAAGTGAAGGTGAAG  | TCGTCATCTCTTTTCAAAC   | 55.25,54.64 | 138 |

|              |            |          |      |      |           |          |                        |                         |             |     |
|--------------|------------|----------|------|------|-----------|----------|------------------------|-------------------------|-------------|-----|
| CakTSSR00478 | CakTC10027 | (TTC)8   | 92   | 115  | --        | --       |                        |                         |             |     |
| CakTSSR00479 | CakTC10035 | (TA)6    | 2116 | 2127 | --        | --       |                        |                         |             |     |
| CakTSSR00480 | CakTC10047 | (GGAAA)5 | 209  | 233  | --        | --       | CATTTC AAGTCGGGAATCTA  | TGCGAAGAATAAACCATTTAG   | 55.31,54.88 | 151 |
| CakTSSR00481 | CakTC10059 | (TTC)6   | 128  | 145  | --        | --       | CTCATTCTTCATTCTGCAAGT  | AGTACATGATCGGTGAGTGAA   | 54.67,55.6  | 152 |
| CakTSSR00482 | CakTC10059 | (TTA)5   | 3816 | 3830 | --        | --       | TTCAGTAGAGAAAAGCCAAGAA | ATATAACTTGCAATGCCCTTA   | 54.59,54.3  | 146 |
| CakTSSR00483 | CakTC10062 | (ATG)5   | 3047 | 3061 | Young_pod | --       | TTCCATCTTCCGTGTATAAAA  | TCTACTTCTTCACACCCTTCA   | 54.94,55.01 | 149 |
| CakTSSR00484 | CakTC10066 | (ATT)5   | 2869 | 2883 | --        | --       |                        |                         |             |     |
| CakTSSR00485 | CakTC10078 | (ATT)5   | 297  | 311  | --        | bHLH     | GAGGAACCATTTCCTTCTTC   | AAAAACCCCTTCTCATTGTGTT  | 54.69,55.38 | 167 |
| CakTSSR00486 | CakTC10088 | (TTA)6   | 394  | 411  | --        | --       | TAAACCCCTTCTTCCTCATTC  | ATTGTTTGGACCACGAAACTT   | 55.13,56.29 | 173 |
| CakTSSR00487 | CakTC10092 | (TC)9    | 171  | 188  | --        | --       | CATCTGAGAAAAAGCTGAAAA  | GTTTTCAAGGTCAAACCTCCAT  | 55,55.78    | 148 |
| CakTSSR00488 | CakTC10107 | (ACC)5   | 274  | 288  | --        | --       | AGAAATCGCGTTATTGGTAAT  | TCTTGCTTTAGAATGTTCGAT   | 55.61,54.4  | 148 |
| CakTSSR00489 | CakTC10108 | (GAA)5   | 1753 | 1767 | --        | --       |                        |                         |             |     |
| CakTSSR00490 | CakTC10114 | (CAA)8   | 225  | 248  | --        | C2C2-Dof | TTGGAAACAGAACTTATTGGA  | ATTTGGTGTTTGTGATTCAC    | 54.97,54.97 | 146 |
| CakTSSR00491 | CakTC10117 | (CA)7    | 206  | 219  | --        | --       | CCAAAGTTGTTTGAACCATAG  | CGGAAAGATTGTGGAACCTTA   | 54.92,54.74 | 147 |
| CakTSSR00492 | CakTC10119 | (AAG)5   | 1062 | 1076 | --        | TRAF     | CATCCAAGACAAAATTCCTTA  | GGCTCTGGAATTTAAACAA     | 54.5,54.64  | 157 |
| CakTSSR00493 | CakTC10120 | (AAC)5   | 1148 | 1162 | --        | --       | TGAATGATGAAGAAATGTTCC  | CCACCTTAATTTTCACCTT     | 55.11,55.1  | 148 |
| CakTSSR00494 | CakTC10135 | (AAT)5   | 2548 | 2562 | --        | --       | TTGAAGGGCACAATTAGATA   | GATAAGATTGGTGCTTTCCT    | 55.1,55.15  | 214 |
| CakTSSR00495 | CakTC10136 | (ATG)6   | 1382 | 1399 | --        | --       | TGAGTCCGATCTGAGAATAGA  | CAAACTCTTAATGCCAACAAATG | 55.01,55.84 | 147 |
| CakTSSR00496 | CakTC10142 | (GCA)5   | 363  | 377  | --        | zf-HD    | CACATGTGGAGGTACAACCTCT | TAACACCACCATCACCCTC     | 55.07,55    | 169 |
| CakTSSR00497 | CakTC10142 | (ACC)5   | 503  | 517  | --        | zf-HD    | GAGTGGTGATGGTGGTAGTTA  | GGAGAAGAGGGTACCATAGAA   | 55,54.99    | 137 |
| CakTSSR00498 | CakTC10142 | (CTTTG)5 | 1095 | 1119 | --        | zf-HD    |                        |                         |             |     |
| CakTSSR00499 | CakTC10148 | (AG)7    | 1510 | 1523 | --        | --       |                        |                         |             |     |
| CakTSSR00500 | CakTC10153 | (GA)8    | 1519 | 1534 | --        | --       |                        |                         |             |     |
| CakTSSR00501 | CakTC10170 | (TCT)5   | 1    | 15   | --        | --       |                        |                         |             |     |
| CakTSSR00502 | CakTC10174 | (TAT)6   | 134  | 151  | --        | --       | GATCAACCTAGTGATTGCAG   | AAGGGACAAGGAGACACTTT    | 54.97,55.36 | 150 |
| CakTSSR00503 | CakTC10180 | (AG)9    | 4882 | 4899 | --        | --       |                        |                         |             |     |
| CakTSSR00504 | CakTC10183 | (TCT)8   | 321  | 344  | --        | --       | AAACATGAGATTCCAGATCCT  | ATTAGTGTGCATTGTCGTCTC   | 55.22,55.32 | 154 |
| CakTSSR00505 | CakTC10190 | (AGG)7   | 238  | 258  | --        | --       | CACATGGAACATCAATGAA    | TTGAAGACAAAAGCACAGAT    | 55.21,55.18 | 153 |
| CakTSSR00506 | CakTC10198 | (AGA)6   | 753  | 770  | --        | --       | AAGTCTAGGGTTTGTGCATTA  | CACCTCACTCATTCAATCC     | 54.2,54.77  | 153 |
| CakTSSR00507 | CakTC10199 | (AGA)5   | 241  | 255  | --        | TCP      | ACTTTCATTTTCCACTTTGG   | ATCCAGACTCGGACACTTTAT   | 55.94,55.33 | 147 |
| CakTSSR00508 | CakTC10199 | (TAA)6   | 973  | 990  | --        | TCP      | CCGGTGCTACTATTGATACTG  | GTCCCTCTGTGAAAGATACT    | 55.07,54.88 | 162 |
| CakTSSR00509 | CakTC10211 | (TAT)5   | 831  | 845  | --        | --       | ATGTGTATGCTATGTCCATCC  | ATCCACAGCTAATCTGAAACA   | 54.87,54.97 | 140 |
| CakTSSR00510 | CakTC10222 | (ATT)6   | 845  | 862  | --        | bHLH     | TCCATCAAAACAAGAGAAAAGA | TAAATTCGACCTTATCAATG    | 55.08,54.49 | 158 |
| CakTSSR00511 | CakTC10232 | (TCT)6   | 226  | 243  | --        | --       | CGAAACGACCATCTCTACTAA  | AATACTACCGGGAGAGTAACG   | 54.75,55.15 | 152 |
| CakTSSR00512 | CakTC10232 | (CAA)5   | 454  | 468  | --        | --       | AAGAACAAATCAGATCCCAAT  | TTGAAGTGGTTACCAGGACTA   | 55.23,54.9  | 150 |
| CakTSSR00513 | CakTC10233 | (AT)8    | 727  | 742  | --        | --       | CACAGTTCAAAGGTTCAAAAG  | AGATGGCACAATTGAAACTAA   | 55.11,54.99 | 148 |
| CakTSSR00514 | CakTC10248 | (CCG)6   | 35   | 52   | --        | --       |                        |                         |             |     |

|              |            |           |      |      |    |              |                        |                       |             |     |
|--------------|------------|-----------|------|------|----|--------------|------------------------|-----------------------|-------------|-----|
| CakTSSR00515 | CakTC10251 | (AAT)6    | 48   | 65   | -- | TRAF         |                        |                       |             |     |
| CakTSSR00516 | CakTC10251 | (ATC)5    | 1467 | 1481 | -- | TRAF         |                        |                       |             |     |
| CakTSSR00517 | CakTC10256 | (TA)6     | 78   | 89   | -- | --           |                        |                       |             |     |
| CakTSSR00518 | CakTC10258 | (ATG)6    | 1316 | 1333 | -- | --           |                        |                       |             |     |
| CakTSSR00519 | CakTC10262 | (AAG)6    | 409  | 426  | -- | --           | GTCTGTCAAATGTTTCTACG   | CCCCTTTACAAACGTTAAGAC | 54.89,55.58 | 148 |
| CakTSSR00520 | CakTC10263 | (GA)7     | 2649 | 2662 | -- | --           |                        |                       |             |     |
| CakTSSR00521 | CakTC10270 | (ACA)6    | 45   | 62   | -- | --           |                        |                       |             |     |
| CakTSSR00522 | CakTC10272 | (GTT)5    | 1218 | 1232 | -- | --           | AGTTTTTCAGAAATGTGAGGA  | TTGGAATGAACCATTACTACA | 54.08,54.88 | 157 |
| CakTSSR00523 | CakTC10275 | (TCC)5    | 120  | 134  | -- | CCHC         | CAAACCTTAACACTAACACCA  | AAAATAGCGAAGAACGTAACC | 55.27,55.42 | 167 |
| CakTSSR00524 | CakTC10288 | (CA)10    | 87   | 106  | -- | --           |                        |                       |             |     |
| CakTSSR00525 | CakTC10288 | (CAA)5    | 481  | 495  | -- | --           | GTCTCGATCCAAACAACAAC   | GGGAAGAATGAGGTAGTAGGA | 55.54,54.99 | 160 |
| CakTSSR00526 | CakTC10288 | (AGA)5    | 889  | 903  | -- | --           | GTTTTAGAACCAACCACAACCA | TTTCAACGATTCTTCTTCAAC | 55.23,54.67 | 150 |
| CakTSSR00527 | CakTC10306 | (ATA)5    | 332  | 346  | -- | --           | TGTTTCATCTTCAAGAGCTTC  | ACAATTCACTGTCAGCATCTT | 55.52,54.85 | 150 |
| CakTSSR00528 | CakTC10310 | (AAT)5    | 466  | 480  | -- | --           | GGGGTACCCTTTATAGAGACA  | AACCAATGATACAAAGGTGTG | 54.89,55.02 | 144 |
| CakTSSR00529 | CakTC10312 | (AT)15    | 1676 | 1705 | -- | --           |                        |                       |             |     |
| CakTSSR00530 | CakTC10321 | (TTC)6    | 10   | 27   | -- | --           |                        |                       |             |     |
| CakTSSR00531 | CakTC10321 | (GAA)6    | 154  | 171  | -- | --           | TGATGATAACGTTTTTGGTAGA | CTCTTTTAACATITCCAGACC | 55.03,55.47 | 154 |
| CakTSSR00532 | CakTC10321 | (GAAAGA)5 | 331  | 360  | -- | --           | CATAACATCGGGTTAAGTGTC  | AAAGAGAACGAAGTGAAGTCT | 54.7,54.84  | 156 |
| CakTSSR00533 | CakTC10332 | (TGA)11   | 468  | 500  | -- | --           | AATCGTACATCACAACGAT    | CAGCATTTACTTTCACCAATC | 54.66,54.99 | 151 |
| CakTSSR00534 | CakTC10340 | (ACC)8    | 160  | 183  | -- | --           | CAACATTCATCAAAACACCTT  | GTGGTTTTGGTTCAACATT   | 55.15,54.96 | 162 |
| CakTSSR00535 | CakTC10348 | (CTC)5    | 179  | 193  | -- | --           | ACCACATCTTAATTCCTCTCC  | GGAGGAGGGAGTATGAGAAAC | 54.82,56.78 | 155 |
| CakTSSR00536 | CakTC10354 | (GA)9     | 1021 | 1038 | -- | --           |                        |                       |             |     |
| CakTSSR00537 | CakTC10366 | (TGA)5    | 992  | 1006 | -- | --           |                        |                       |             |     |
| CakTSSR00538 | CakTC10368 | (AAC)7    | 275  | 295  | -- | MYB-related  | CAGTATCATGATTTTCGGTGT  | GTGGTTGTCGTATTGAGAGA  | 55.1,55.3   | 119 |
| CakTSSR00539 | CakTC10377 | (GA)9     | 1    | 18   | -- | --           |                        |                       |             |     |
| CakTSSR00540 | CakTC10379 | (TG)6     | 1    | 12   | -- | --           |                        |                       |             |     |
| CakTSSR00541 | CakTC10390 | (CAG)7    | 2225 | 2245 | -- | C3H          | TTGGTTAAGGATGTTCTTCT   | CTACCATCTGCTCTTGCTCTA | 55.47,55.05 | 154 |
| CakTSSR00542 | CakTC10403 | (TCCTCT)6 | 2289 | 2324 | -- | --           | TCATCATTGTTGTCATCTTCA  | TCAAAGTGATCTGATGGATTC | 54.91,55.09 | 138 |
| CakTSSR00543 | CakTC10409 | (TA)8     | 3    | 18   | -- | --           |                        |                       |             |     |
| CakTSSR00544 | CakTC10417 | (TCA)5    | 98   | 112  | -- | Pseudo_ARR-B |                        |                       |             |     |
| CakTSSR00545 | CakTC10427 | (ATT)5    | 3267 | 3281 | -- | PHD          | GAATCAATTTCTTCACCGTTA  | CCTCTCGATCATCTCTACTCC | 54.49,55.55 | 148 |
| CakTSSR00546 | CakTC10445 | (AGA)5    | 1064 | 1078 | -- | BSD          | GATCTTGAGTGGGATGAGATT  | CATCATCTTCAATATCCCAAC | 55.63,54.49 | 151 |
| CakTSSR00547 | CakTC10450 | (ACA)6    | 1338 | 1355 | -- | SBP          | AAGCTTCTCTCTAAACCAAA   | GTGCTGTTGTTGTTGTTGTTG | 55.14,54.92 | 153 |
| CakTSSR00548 | CakTC10459 | (AG)11    | 3566 | 3587 | -- | --           |                        |                       |             |     |
| CakTSSR00549 | CakTC10461 | (AAT)5    | 453  | 467  | -- | --           | GTGATTCACCTCAAACCTCAA  | TTCTCAATGACTGTTGGTTTT | 55.26,54.85 | 157 |
| CakTSSR00550 | CakTC10469 | (GGT)5    | 709  | 723  | -- | C2H2         | AGAGTGCAAGGTTAACATCAG  | GTGAACCAAACTGTGAAACAT | 54.63,55.04 | 156 |
| CakTSSR00551 | CakTC10469 | (CAA)5    | 828  | 842  | -- | C2H2         | ATGTTTCACAGTTTGTTTCAC  | TCCCATATCTGAAATTGTTG  | 55.04,55.17 | 143 |

|              |            |           |      |      |            |      |                       |                       |             |     |
|--------------|------------|-----------|------|------|------------|------|-----------------------|-----------------------|-------------|-----|
| CakTSSR00552 | CakTC10470 | (GGT)6    | 553  | 570  | --         | --   | CGGTGAAGAATTTAAGGAACT | AAACCCTAATGGACGATACTC | 55.24,54.88 | 156 |
| CakTSSR00553 | CakTC10473 | (GAA)6    | 9    | 26   | --         | --   |                       |                       |             |     |
| CakTSSR00554 | CakTC10493 | (GAT)5    | 4    | 18   | Flower bud | bHLH |                       |                       |             |     |
| CakTSSR00555 | CakTC10506 | (TTAT)5   | 1238 | 1257 | --         | --   |                       |                       |             |     |
| CakTSSR00556 | CakTC10519 | (TGG)5    | 1485 | 1499 | --         | --   | CTGAAATTGCTGGAATAATGA | CGTTCTCAGTTTCTTCCTT   | 55.49,55.42 | 150 |
| CakTSSR00557 | CakTC10534 | (ACA)6    | 43   | 60   | --         | --   |                       |                       |             |     |
| CakTSSR00558 | CakTC10541 | (AC)6     | 109  | 120  | --         | --   | TGAGCTCTATGAAAGAGGTTG | GGATTTCAAAAGAGCTTGAAT | 54.85,55.27 | 143 |
| CakTSSR00559 | CakTC10590 | (GAT)5    | 392  | 406  | --         | --   | CTAGTGCCTTTGAAAGTGTTG | CATTTCACAATCAGGTAAAG  | 55.31,54.84 | 147 |
| CakTSSR00560 | CakTC10591 | (CAA)7    | 167  | 187  | --         | bHLH | ATGCCITCAAGTTCAACAC   | GAGGCATGTAATCAACAATTC | 55.28,54.73 | 149 |
| CakTSSR00561 | CakTC10600 | (GAA)5    | 447  | 461  | --         | --   |                       |                       |             |     |
| CakTSSR00562 | CakTC10607 | (GGA)5    | 1364 | 1378 | --         | TCP  | TCCAAACGAATAACCTAACAA | GTCTCTTTTTCTTCCCATGT  | 55.02,55.03 | 153 |
| CakTSSR00563 | CakTC10607 | (CTT)8    | 2010 | 2033 | --         | TCP  | TCGACATGATAACACAAGTCA | TAAGATCAAAACAACTCAGC  | 55.04,55.48 | 160 |
| CakTSSR00564 | CakTC10649 | (TCA)5    | 486  | 500  | --         | MYB  | CTGAAGAAATTGCAACAGAT  | TGAAAGTGCTTCACTAAGAGC | 54.7,55.09  | 156 |
| CakTSSR00565 | CakTC10651 | (CTG)6    | 90   | 107  | --         | --   |                       |                       |             |     |
| CakTSSR00566 | CakTC10655 | (GAA)5    | 2263 | 2277 | --         | --   |                       |                       |             |     |
| CakTSSR00567 | CakTC10676 | (TGT)7    | 471  | 491  | --         | HB   | ATATTTTGTGTTGGTGTCTG  | GAAGCCAATGGTAGAAGAAAT | 55.2,55.15  | 155 |
| CakTSSR00568 | CakTC10676 | (CCT)6    | 863  | 880  | --         | HB   | TTGATTAAGCTCTCTGCTG   | GCACAGGTGAAGCATAGTAGT | 55.2,54.65  | 150 |
| CakTSSR00569 | CakTC10676 | (GAA)8    | 2231 | 2254 | --         | HB   | TCTTGGGACATAGAATTTGAA | GATGATTCAACATGGGAATA  | 54.89,54.92 | 149 |
| CakTSSR00570 | CakTC10678 | (AATTTC)5 | 96   | 125  | --         | --   |                       |                       |             |     |
| CakTSSR00571 | CakTC10682 | (GTT)6    | 1460 | 1477 | --         | --   | ACACCGTTTCACACACT     | GTTTCCAAGGAAATCAAGAA  | 54.6,55.99  | 147 |
| CakTSSR00572 | CakTC10682 | (GA)7     | 1820 | 1833 | --         | --   |                       |                       |             |     |
| CakTSSR00573 | CakTC10685 | (TC)17    | 272  | 305  | --         | --   | GTGTGAAGTTTGTGTTCTTTG | AGGAACAGAGAGTTTGAGACC | 54.31,55.07 | 140 |
| CakTSSR00574 | CakTC10699 | (CTT)7    | 1309 | 1329 | --         | --   |                       |                       |             |     |
| CakTSSR00575 | CakTC10700 | (TG)10    | 263  | 282  | --         | --   | CGACTTCTGAAATTTATGTGG | CTAGGAAAGGTACAAAAGCAA | 55,54.14    | 160 |
| CakTSSR00576 | CakTC10727 | (TCA)5    | 244  | 258  | --         | --   | TTTGTCAACTTTTGATCCTC  | ATTGGTGATGTTAGTGATGCT | 54.5,54.66  | 159 |
| CakTSSR00577 | CakTC10727 | (CAT)5    | 1051 | 1065 | --         | --   | CATTATCAGCAGATACGGACT | GATTCTGCTGGAAGTGAAGAT | 54.53,56.04 | 148 |
| CakTSSR00578 | CakTC10741 | (AG)9     | 1986 | 2003 | --         | --   | TGGACCAAGAAAATAACTTGA | TTACCTTTGCAATGTTTGCT  | 54.97,55.07 | 143 |
| CakTSSR00579 | CakTC10743 | (AAC)5    | 452  | 466  | --         | --   | CAAATCGCAGACCTTTATTTA | GCGAGTTTTTAGGTGTTGATA | 54.88,54.77 | 152 |
| CakTSSR00580 | CakTC10743 | (TAA)5    | 1435 | 1449 | --         | --   | TGTGTGTGTGATGTTTCTGA  | AATCCCTCTTCTCAAGGTAA  | 55.09,54.74 | 150 |
| CakTSSR00581 | CakTC10751 | (TA)6     | 47   | 58   | --         | --   |                       |                       |             |     |
| CakTSSR00582 | CakTC10752 | (TC)6     | 233  | 244  | --         | --   |                       |                       |             |     |
| CakTSSR00583 | CakTC10754 | (AAT)5    | 265  | 279  | --         | --   | AGGAGGAGGTTGGTGATAGTA | CGGAGTCTAGAAAGAAAGAGG | 55.34,55.12 | 152 |
| CakTSSR00584 | CakTC10754 | (GA)48    | 1942 | 2037 | --         | --   |                       |                       |             |     |
| CakTSSR00585 | CakTC10761 | (AG)7     | 680  | 693  | --         | --   | GGAGCTTAGAAATAGTGGA   | TTTGCCAACTGAATCGTAGT  | 55.32,55.91 | 150 |
| CakTSSR00586 | CakTC10765 | (AG)9     | 1786 | 1803 | --         | --   |                       |                       |             |     |
| CakTSSR00587 | CakTC10782 | (TG)6     | 8    | 19   | --         | --   |                       |                       |             |     |
| CakTSSR00588 | CakTC10792 | (AAG)6    | 94   | 111  | Flower bud | --   |                       |                       |             |     |

|              |            |            |      |      |            |            |                       |                       |             |     |
|--------------|------------|------------|------|------|------------|------------|-----------------------|-----------------------|-------------|-----|
| CakTSSR00589 | CakTC10795 | (TTG)5     | 611  | 625  | --         | --         | TTCTCCAAGAGTTTAGGGTTT | TGATAAACCTCTCACGAAATC | 54.82,54.45 | 159 |
| CakTSSR00590 | CakTC10797 | (GGA)6     | 352  | 369  | --         | G2-like    | GTCGAATGTGGTAGGTGTTA  | CGTAGGAGGAATGAGAGAAAT | 55.18,55.15 | 133 |
| CakTSSR00591 | CakTC10799 | (ATT)6     | 27   | 44   | --         | --         |                       |                       |             |     |
| CakTSSR00592 | CakTC10802 | (TC)10     | 34   | 53   | --         | --         |                       |                       |             |     |
| CakTSSR00593 | CakTC10817 | (GT)6      | 1596 | 1607 | --         | --         |                       |                       |             |     |
| CakTSSR00594 | CakTC10824 | (GAA)5     | 62   | 76   | --         | --         |                       |                       |             |     |
| CakTSSR00595 | CakTC10832 | (ATC)6     | 119  | 136  | --         | C2C2-YABBY | CATATATCCAAGGTGTGGTTG | GTGGTCCAGTGATAATGTTGT | 55.4,54.81  | 150 |
| CakTSSR00596 | CakTC10890 | (GAG)5     | 309  | 323  | --         | --         |                       |                       |             |     |
| CakTSSR00597 | CakTC10898 | (ACA)6     | 105  | 122  | Flower bud | --         | GAGAGAGGACCCAGATACAAT | CAAACCAACTTGAACTTGAC  | 54.79,54.94 | 153 |
| CakTSSR00598 | CakTC10914 | (GAA)5     | 89   | 103  | --         | --         |                       |                       |             |     |
| CakTSSR00599 | CakTC10923 | (TC)6      | 136  | 147  | --         | --         | ATACCCACTCTCACAACACAC | CTTGGGACATGCTTTGACT   | 54.88,55.1  | 159 |
| CakTSSR00600 | CakTC10938 | (AG)12     | 936  | 959  | --         | --         | AGAGGTGGAGGTGAGGTATAG | ATTCTTTGCATTCTCAACAAG | 54.93,54.7  | 159 |
| CakTSSR00601 | CakTC10946 | (TGA)5     | 733  | 747  | --         | FHA        | TTGGAAGAAACACTGAATGAT | CTTTTCTTCGTACGGTCATA  | 54.77,54.78 | 150 |
| CakTSSR00602 | CakTC10949 | (AGAAAGC)5 | 842  | 871  | --         | --         | ATGATGCAGATTGGTTAGAA  | GTGGTAGTGTAGGGGAAGTTT | 54.91,54.86 | 153 |
| CakTSSR00603 | CakTC10959 | (AG)8      | 52   | 67   | --         | --         |                       |                       |             |     |
| CakTSSR00604 | CakTC10966 | (TTG)6     | 673  | 690  | --         | --         |                       |                       |             |     |
| CakTSSR00605 | CakTC10967 | (AG)6      | 1378 | 1389 | --         | MYB        | TTTGATATATGAGGATGGTG  | AGTTTCACTTTTGTGCCTTA  | 54.96,54.41 | 177 |
| CakTSSR00606 | CakTC10973 | (GA)6      | 667  | 678  | --         | --         | GGCTACTGAAGAACAAATTCA | TATAAGCATTCTCCGTTATG  | 54.7,54.68  | 157 |
| CakTSSR00607 | CakTC10974 | (TGA)6     | 357  | 374  | --         | --         | CGATGATCAACTCAATGTCTC | CCTCCAGGAGTCGTAATAGTT | 55.65,55.11 | 144 |
| CakTSSR00608 | CakTC10982 | (AAG)8     | 117  | 140  | --         | --         | GAGGTGAATTCGATTGATGTA | AGAAGAAATGGCAATTTTAGG | 55.15,55.33 | 138 |
| CakTSSR00609 | CakTC10995 | (AG)28     | 988  | 1043 | --         | --         |                       |                       |             |     |
| CakTSSR00610 | CakTC11001 | (CAC)6     | 196  | 213  | --         | --         | CCCAACTTTCTAACCCTTTAC | GGAAGGAATCAAGAGAGGTAG | 54.72,54.71 | 164 |
| CakTSSR00611 | CakTC11014 | (TAA)5     | 50   | 64   | --         | Tify       |                       |                       |             |     |
| CakTSSR00612 | CakTC11019 | (GAA)5     | 436  | 450  | --         | --         |                       |                       |             |     |
| CakTSSR00613 | CakTC11024 | (ATGC)5    | 265  | 284  | --         | --         | ATGACTGGGAATGGAAGATG  | CCACTCTATCCATGAGTTGAA | 56.46,55.23 | 175 |
| CakTSSR00614 | CakTC11032 | (AAT)6     | 173  | 190  | --         | AUX/IAA    | TCATTCTTGTCCTCAATGAA  | AGGTCGAGGCTAGTATAGGAA | 54.89,54.96 | 152 |
| CakTSSR00615 | CakTC11037 | (CA)8      | 58   | 73   | Young_pod  | --         |                       |                       |             |     |
| CakTSSR00616 | CakTC11047 | (CAA)7     | 858  | 878  | --         | --         | TCGAAAAACCTATCCTTTCAT | ACTGATGATTGGTACTGATGG | 55.55,54.91 | 153 |
| CakTSSR00617 | CakTC11048 | (TG)8      | 542  | 557  | --         | C2C2-YABBY |                       |                       |             |     |
| CakTSSR00618 | CakTC11054 | (TCTGGT)8  | 620  | 667  | --         | --         | GTAATCCTGGAAGTAGGAGGA | GAGGTTCAACCATAACCTCA  | 54.99,55.03 | 147 |
| CakTSSR00619 | CakTC11066 | (AG)27     | 2928 | 2981 | --         | --         |                       |                       |             |     |
| CakTSSR00620 | CakTC11070 | (GAA)5     | 457  | 471  | Shoot      | --         |                       |                       |             |     |
| CakTSSR00621 | CakTC11084 | (CT)15     | 13   | 42   | --         | --         |                       |                       |             |     |
| CakTSSR00622 | CakTC11087 | (TG)6      | 1    | 12   | --         | --         |                       |                       |             |     |
| CakTSSR00623 | CakTC11087 | (AC)7      | 946  | 959  | --         | --         | GTGTGCATACATTACATGTGC | AGCCAAGAAAAGGAGATTAAA | 54.93,55.06 | 156 |
| CakTSSR00624 | CakTC11091 | (GAA)6     | 183  | 200  | --         | --         | GGGCTTTGACTTTCAAATAA  | GGATTGGAAGAATTCAAGTT  | 54.64,54.97 | 145 |
| CakTSSR00625 | CakTC11097 | (CAC)5     | 115  | 129  | --         | --         | TCTAGAGCCACTACCAGTGAA | ATTGAAGAGGGATTGAGAGAG | 55.22,55.1  | 149 |

|              |            |         |      |      |            |    |                       |                       |             |     |
|--------------|------------|---------|------|------|------------|----|-----------------------|-----------------------|-------------|-----|
| CakTSSR00626 | CakTC11099 | (TCA)5  | 617  | 631  | --         | -- | CAGAAGATGTTCAATCCATGT | GACAGTTATGCAGCTTTCCT  | 55.05,54.78 | 150 |
| CakTSSR00627 | CakTC11102 | (GAA)5  | 526  | 540  | --         | -- | CTGAGGAAGATGAAGAGGACT | ACAAATCTTGTGTGTTTCCA  | 55.17,55.64 | 154 |
| CakTSSR00628 | CakTC11116 | (ATC)6  | 298  | 315  | --         | -- | CCTTTTCTGATTTCCTGAAT  | GCCGAAAATTCACCTGAGTA  | 55.13,55.54 | 159 |
| CakTSSR00629 | CakTC11140 | (CT)6   | 189  | 200  | --         | -- | ACCAAACAAGGAACAATCTCT | GTTTGAAGGGTGATGATATG  | 55.38,54.58 | 150 |
| CakTSSR00630 | CakTC11163 | (TC)6   | 92   | 103  | Young_pod  | -- |                       |                       |             |     |
| CakTSSR00631 | CakTC11174 | (GA)14  | 1027 | 1054 | --         | -- |                       |                       |             |     |
| CakTSSR00632 | CakTC11206 | (GA)10  | 801  | 820  | --         | -- | CAACCTCTTAAATCCCTCAT  | CCCACAAACACTTATTCATT  | 55.01,54.29 | 150 |
| CakTSSR00633 | CakTC11208 | (ATG)8  | 21   | 44   | Shoot      | -- |                       |                       |             |     |
| CakTSSR00634 | CakTC11216 | (AAC)5  | 442  | 456  | --         | -- |                       |                       |             |     |
| CakTSSR00635 | CakTC11236 | (CCT)5  | 253  | 267  | Flower bud | -- | ACGACTTCTCGTATACCTTCC | TAGAAGTATCTGAGCGATGGA | 55.1,55.23  | 158 |
| CakTSSR00636 | CakTC11237 | (CTT)6  | 431  | 448  | --         | -- |                       |                       |             |     |
| CakTSSR00637 | CakTC11243 | (GAT)5  | 528  | 542  | --         | -- |                       |                       |             |     |
| CakTSSR00638 | CakTC11271 | (TTA)5  | 114  | 128  | --         | -- | AAGATCAGTGAAATGCCTAAT | TCAATCTTCAAATGTTAGTGC | 53.19,54.74 | 146 |
| CakTSSR00639 | CakTC11336 | (AAC)6  | 34   | 51   | Shoot      | -- |                       |                       |             |     |
| CakTSSR00640 | CakTC11354 | (TGT)6  | 518  | 535  | --         | -- |                       |                       |             |     |
| CakTSSR00641 | CakTC11367 | (CT)10  | 116  | 135  | --         | -- | TTCTCTTACCTCAAGTGCAAC | AATATGGGAAGAGAAGACCAG | 54.76,54.99 | 157 |
| CakTSSR00642 | CakTC11369 | (AAT)5  | 1333 | 1347 | --         | -- |                       |                       |             |     |
| CakTSSR00643 | CakTC11370 | (TAA)10 | 1    | 30   | --         | -- |                       |                       |             |     |
| CakTSSR00644 | CakTC11371 | (GAA)7  | 280  | 300  | --         | -- | CAACCTAAAGATGAAGTCGAA | GTTCTTGTTTTTCGAATGATG | 54.72,54.96 | 149 |
| CakTSSR00645 | CakTC11374 | (TG)7   | 1187 | 1200 | --         | -- |                       |                       |             |     |
| CakTSSR00646 | CakTC11384 | (GA)14  | 1246 | 1273 | --         | -- | GAGGCATCTTCCTTACTTGT  | TTTCCACTGATAGCATAGCAT | 55.22,55.1  | 147 |
| CakTSSR00647 | CakTC11388 | (TTC)8  | 72   | 95   | --         | -- |                       |                       |             |     |
| CakTSSR00648 | CakTC11390 | (AAG)5  | 166  | 180  | --         | -- | ATGAGATGGCGAAGGTATTAT | CACGAAGACTGCTCTGATAAC | 55.38,55.2  | 163 |
| CakTSSR00649 | CakTC11396 | (TTG)5  | 1236 | 1250 | --         | -- | GTTTTGAATTTCTTGTCAGCA | TCTCAATGGTTACAAGTCAGG | 55.6,55.31  | 150 |
| CakTSSR00650 | CakTC11403 | (CGA)5  | 554  | 568  | --         | -- | GTCACAGTTTTCATCATCCAC | AAATCCGATGACGAAGAGTAG | 55.38,56.06 | 146 |
| CakTSSR00651 | CakTC11411 | (TTG)5  | 1731 | 1745 | --         | -- | TCTTCTTGTTCTTGAGTTCCA | TCTCACTCTCACAGACACACA | 55.14,55.13 | 149 |
| CakTSSR00652 | CakTC11411 | (TTC)6  | 1985 | 2002 | --         | -- | GTGTCTTGACCTTAAACGA   | ATGATGGAAATGAAAGGAAGT | 54.59,55.23 | 150 |
| CakTSSR00653 | CakTC11415 | (TCA)7  | 103  | 123  | --         | -- | GAGAAGCATTTAGTTCACACG | ATTTACACAGCAACAGAAGGA | 55.22,55.05 | 150 |
| CakTSSR00654 | CakTC11421 | (TCT)6  | 102  | 119  | --         | -- | GATTGGGTTCACTTACCTTTT | ATGGAGAGAAAGGAGAAGAAA | 54.92,54.83 | 150 |
| CakTSSR00655 | CakTC11450 | (TC)18  | 1    | 36   | --         | -- |                       |                       |             |     |
| CakTSSR00656 | CakTC11466 | (TTC)6  | 1678 | 1695 | --         | -- |                       |                       |             |     |
| CakTSSR00657 | CakTC11473 | (TTC)5  | 1195 | 1209 | --         | -- | TTACTCTCCGTTCTTATCC   | TGCTAAGTCTTCGAATTTCAG | 55.16,55.04 | 180 |
| CakTSSR00658 | CakTC11475 | (CT)7   | 1842 | 1855 | --         | -- |                       |                       |             |     |
| CakTSSR00659 | CakTC11482 | (TG)6   | 1830 | 1841 | --         | -- |                       |                       |             |     |
| CakTSSR00660 | CakTC11484 | (GAA)6  | 1656 | 1673 | --         | -- |                       |                       |             |     |
| CakTSSR00661 | CakTC11486 | (CT)10  | 1731 | 1750 | --         | -- |                       |                       |             |     |
| CakTSSR00662 | CakTC11529 | (CCA)5  | 96   | 110  | Young_pod  | -- |                       |                       |             |     |

|              |            |          |      |      |      |            |                        |                        |             |     |
|--------------|------------|----------|------|------|------|------------|------------------------|------------------------|-------------|-----|
| CakTSSR00663 | CakTC11531 | (CTT)5   | 1    | 15   | --   | --         |                        |                        |             |     |
| CakTSSR00664 | CakTC11532 | (TC)8    | 187  | 202  | --   | --         | ATTTCTTTCTCCAATCTCCAC  | AATCTTGAGGTGATTTCATT   | 54.95,55.23 | 163 |
| CakTSSR00665 | CakTC11532 | (CAA)6   | 498  | 515  | --   | --         | ACCAACAACAAAACCTAATCA  | TTGAGACTGTTCTTCTTTCA   | 54.75,55.14 | 153 |
| CakTSSR00666 | CakTC11532 | (ACA)6   | 689  | 706  | --   | --         | GGAACAGTCTCAAGAACAGTG  | CTAAGAGCAAGTGATGGAAAA  | 54.89,54.88 | 154 |
| CakTSSR00667 | CakTC11549 | (AGA)7   | 40   | 60   | --   | --         |                        |                        |             |     |
| CakTSSR00668 | CakTC11551 | (CT)7    | 57   | 70   | --   | --         |                        |                        |             |     |
| CakTSSR00669 | CakTC11555 | (TTC)5   | 2057 | 2071 | --   | --         | TCCTTCTTCTCCTTCTTCTTC  | CTCTACTCCAACAATGTCACC  | 54.55,54.69 | 151 |
| CakTSSR00670 | CakTC11582 | (AGA)5   | 69   | 83   | --   | --         |                        |                        |             |     |
| CakTSSR00671 | CakTC11588 | (TG)6    | 27   | 38   | --   | --         |                        |                        |             |     |
| CakTSSR00672 | CakTC11589 | (TA)7    | 948  | 961  | --   | --         | ATTATACAATAGGCACGCAGA  | TTCACACACACAAGGCTCTAT  | 55.15,55.85 | 157 |
| CakTSSR00673 | CakTC11595 | (TGG)5   | 782  | 796  | --   | --         |                        |                        |             |     |
| CakTSSR00674 | CakTC11620 | (CAC)5   | 763  | 777  | --   | --         |                        |                        |             |     |
| CakTSSR00675 | CakTC11621 | (CAA)5   | 397  | 411  | --   | --         | ATTGGAGCTTCTTCCACTT    | ATGAAGTAGGTTGTGGTGTG   | 55.61,55.08 | 161 |
| CakTSSR00676 | CakTC11623 | (TGA)5   | 141  | 155  | --   | --         | TAGTGGTAGTGGGCATAGTGT  | AGAGACACTTGAGTTGGGTTT  | 54.8,55.45  | 179 |
| CakTSSR00677 | CakTC11633 | (GAA)5   | 287  | 301  | --   | WRKY       | GCGAAGGATAAAGATGAAGAT  | TGTCTTGAACGAAACTCTTGT  | 55.23,55.08 | 147 |
| CakTSSR00678 | CakTC11648 | (AT)6    | 483  | 494  | --   | --         |                        |                        |             |     |
| CakTSSR00679 | CakTC11680 | (TTC)7   | 1590 | 1610 | --   | --         | GATTGGGGAATATTCTGATTT  | ACAACACTCACACTCCACACT  | 54.71,55.49 | 151 |
| CakTSSR00680 | CakTC11682 | (TTC)5   | 164  | 178  | --   | --         | CTTTAGCATTGTCTGAGCTGT  | AAAGGGTTGTTTACATCTTCC  | 54.96,54.92 | 151 |
| CakTSSR00681 | CakTC11689 | (TTTAT)7 | 85   | 119  | --   | --         |                        |                        |             |     |
| CakTSSR00682 | CakTC11726 | (TGG)5   | 154  | 168  | --   | PBF-2-like | ATAGCACTGCACTGTCTCTTC  | ACTCCTCAACTTCAAACACA   | 54.76,54.92 | 148 |
| CakTSSR00683 | CakTC11727 | (TC)9    | 1462 | 1479 | --   | --         | GCCATTTTTGAGAGTTTACAA  | GTAATTGGAAGAGGATGGAGT  | 54.73,54.82 | 141 |
| CakTSSR00684 | CakTC11745 | (AG)6    | 512  | 523  | --   | --         | TCTCTTGAGTCAAAATATGCAA | AAAATTAGGATTGAGGGTTTG  | 55.3,55.03  | 149 |
| CakTSSR00685 | CakTC11747 | (ATA)12  | 2286 | 2321 | --   | --         |                        |                        |             |     |
| CakTSSR00686 | CakTC11766 | (GAA)5   | 53   | 67   | --   | --         |                        |                        |             |     |
| CakTSSR00687 | CakTC11766 | (ATAC)5  | 823  | 842  | --   | --         |                        |                        |             |     |
| CakTSSR00688 | CakTC11780 | (CT)7    | 19   | 32   | --   | --         |                        |                        |             |     |
| CakTSSR00689 | CakTC11792 | (TG)8    | 1494 | 1509 | --   | --         | GAACAGAGATAGGGAACCATT  | GTAGTCGGTTACCATCCTACC  | 54.82,55.22 | 158 |
| CakTSSR00690 | CakTC11794 | (GCT)5   | 1391 | 1405 | --   | --         | AGTGCTGCTGTAGTAATGGA   | ATCAAAAATAATGGATCTGCTG | 55.25,54.44 | 161 |
| CakTSSR00691 | CakTC11806 | (GA)11   | 438  | 459  | --   | --         |                        |                        |             |     |
| CakTSSR00692 | CakTC11821 | (TGT)5   | 708  | 722  | --   | --         | CTAGTCTCCAACAAAAACCT   | TGCATAAACTAGAAGCAGGAC  | 55.15,54.9  | 138 |
| CakTSSR00693 | CakTC11841 | (ACC)10  | 638  | 667  | Root | --         | ATGAATGAATTCCTCTAAATC  | GGTCATTAACGTTATCACGAG  | 54.71,54.86 | 152 |
| CakTSSR00694 | CakTC11874 | (TGG)5   | 590  | 604  | --   | --         | CAGACTTGGAGAAGCTTATGA  | TGAGGAAAGGTTTCATACAA   | 54.85,54.97 | 160 |
| CakTSSR00695 | CakTC11875 | (CT)19   | 1    | 38   | --   | --         |                        |                        |             |     |
| CakTSSR00696 | CakTC11911 | (CAT)5   | 304  | 318  | --   | --         | TAAAAAGCGAGTGTACAGGAA  | GCATTTGTATACTGGAAAACG  | 55.4,55.04  | 170 |
| CakTSSR00697 | CakTC11924 | (AAG)6   | 132  | 149  | --   | --         | TGATGAGATTGAAATTGAGGA  | AATGGCATTATGTTCTGTAG   | 55.71,55.31 | 142 |
| CakTSSR00698 | CakTC11932 | (TTC)5   | 12   | 26   | --   | --         |                        |                        |             |     |
| CakTSSR00699 | CakTC11935 | (AG)8    | 2    | 17   | --   | --         |                        |                        |             |     |

|              |            |        |      |      |           |              |                        |                        |             |     |
|--------------|------------|--------|------|------|-----------|--------------|------------------------|------------------------|-------------|-----|
| CakTSSR00700 | CakTC11942 | (TCA)5 | 197  | 211  | --        | --           | GTCATTGTTTCTCTCCTCTC   | TATGTCAATCGGAAACAACCTT | 55.42,54.83 | 151 |
| CakTSSR00701 | CakTC11960 | (CAT)5 | 79   | 93   | Young_pod | --           |                        |                        |             |     |
| CakTSSR00702 | CakTC11997 | (TTA)5 | 270  | 284  | Young_pod | --           | GCCATAGAATCATCACTTTCA  | TAGTGAATCTGGATGGACAAT  | 55.31,54.55 | 156 |
| CakTSSR00703 | CakTC12013 | (TGT)5 | 138  | 152  | --        | --           | AGTGGTTTCTGAGTTGTTTCA  | ATTCAACCTCACAGTTTCAGA  | 54.92,54.83 | 149 |
| CakTSSR00704 | CakTC12034 | (ATT)9 | 230  | 256  | --        | --           |                        |                        |             |     |
| CakTSSR00705 | CakTC12085 | (TTA)7 | 2060 | 2080 | --        | --           | ATGGAACTTCTCTTTTATCG   | TGTGATCCATTAGAAATCTAGG | 55.16,53.65 | 166 |
| CakTSSR00706 | CakTC12092 | (TC)6  | 3    | 14   | --        | --           |                        |                        |             |     |
| CakTSSR00707 | CakTC12097 | (CT)8  | 123  | 138  | --        | --           | CTCTTCTCCGACTCACTCAG   | GCATTTTAAACTTCACCTTG   | 55.14,54.36 | 152 |
| CakTSSR00708 | CakTC12122 | (TA)6  | 791  | 802  | --        | --           | AAATGACAGCATCGAAGATT   | GCACAAAAGAGGTATTAGCA   | 54.86,54.92 | 161 |
| CakTSSR00709 | CakTC12180 | (AAT)5 | 331  | 345  | --        | --           |                        |                        |             |     |
| CakTSSR00710 | CakTC12184 | (TC)6  | 12   | 23   | --        | --           |                        |                        |             |     |
| CakTSSR00711 | CakTC12201 | (CCA)7 | 1837 | 1857 | --        | --           | TCCTTCTCACGTTTCTCTACA  | GGAGAAAGTGATTGGAGAATG  | 55.18,56.3  | 161 |
| CakTSSR00712 | CakTC12223 | (AAC)7 | 461  | 481  | --        | bHLH         | TGAACAACGTTTCTTCTTTC   | GTTTGGAACTGAAATCAACA   | 54.72,55.28 | 148 |
| CakTSSR00713 | CakTC12242 | (TTA)5 | 1181 | 1195 | --        | G2-like      | GCTTAGGTTGTGATGTAGTCG  | GATGATGATTCTCTTCAACCA  | 55.09,55.09 | 152 |
| CakTSSR00714 | CakTC12282 | (TCT)5 | 201  | 215  | --        | --           | ATCCCAATTCCTCTCTAT     | TCAGGTTCAACACAGATGAAT  | 55.01,55.56 | 150 |
| CakTSSR00715 | CakTC12304 | (GAC)5 | 3406 | 3420 | --        | --           | ATCTCCTGTTGAGATTGATGA  | CCCAATTTCATCATGTACT    | 54.65,54.93 | 153 |
| CakTSSR00716 | CakTC12307 | (AG)12 | 4321 | 4344 | --        | --           |                        |                        |             |     |
| CakTSSR00717 | CakTC12336 | (CT)6  | 539  | 550  | --        | --           | GCTCCCTCTTAAGTTTACGTC  | CCAAACGTAGAAAAGATGATG  | 54.99,55    | 150 |
| CakTSSR00718 | CakTC12339 | (TGA)7 | 928  | 948  | --        | TCP          | GGCTCTTGATACCCTTACAAT  | CAACCAAAAAGACAAGAATGA  | 55.03,55.45 | 160 |
| CakTSSR00719 | CakTC12339 | (TG)7  | 1202 | 1215 | --        | TCP          |                        |                        |             |     |
| CakTSSR00720 | CakTC12409 | (TC)6  | 245  | 256  | --        | --           | AGAAAGGCTATGACTTTCACA  | CCCGTCTTCCAAATTAATA    | 54.28,55.97 | 151 |
| CakTSSR00721 | CakTC12420 | (GCG)8 | 125  | 148  | --        | --           | GAGGTCAATCTGTACAAGAA   | TATTGGAAAAAGAAGCATCAG  | 54.67,54.82 | 151 |
| CakTSSR00722 | CakTC12420 | (TC)8  | 337  | 352  | --        | --           |                        |                        |             |     |
| CakTSSR00723 | CakTC12438 | (CT)8  | 106  | 121  | --        | --           | TGGTATCTCGGATTCTATCTTC | TGTAGGGTCATATCAAGTGT   | 55.1,54.84  | 139 |
| CakTSSR00724 | CakTC12446 | (CAT)5 | 135  | 149  | --        | --           | ACACACTTCAGAGCAAAGAGA  | GCTTTTGGACATGTATTGAG   | 55.24,54.99 | 150 |
| CakTSSR00725 | CakTC12447 | (CAT)5 | 112  | 126  | --        | --           | CACACTTCAGAGCAAAGAGAC  | TTTACAATGGTTTCAGCTTGT  | 55.24,55.07 | 164 |
| CakTSSR00726 | CakTC12452 | (TTC)5 | 18   | 32   | Shoot     | --           |                        |                        |             |     |
| CakTSSR00727 | CakTC12459 | (CT)14 | 80   | 107  | --        | --           |                        |                        |             |     |
| CakTSSR00728 | CakTC12462 | (AGG)5 | 1057 | 1071 | --        | --           | TAATCAGAAGTGAAACGGTGA  | GATTACGAACCTGGTGAACCTT | 55.9,55.82  | 152 |
| CakTSSR00729 | CakTC12463 | (TA)14 | 49   | 76   | --        | --           |                        |                        |             |     |
| CakTSSR00730 | CakTC12491 | (TAT)8 | 62   | 85   | --        | --           |                        |                        |             |     |
| CakTSSR00731 | CakTC12504 | (CCA)5 | 312  | 326  | --        | --           | AAGAAGCCGTACAATACCAT   | AGGAGGAGATTGTAAACTGG   | 55.53,55.07 | 150 |
| CakTSSR00732 | CakTC12506 | (GA)7  | 1922 | 1935 | Young_pod | --           |                        |                        |             |     |
| CakTSSR00733 | CakTC12507 | (AG)8  | 1576 | 1591 | --        | --           | TTGAAGAGGTAGTGAATGGTG  | CTTTCTTTTCTCTTCACAT    | 55.31,55.21 | 146 |
| CakTSSR00734 | CakTC12551 | (CCA)5 | 1450 | 1464 | --        | --           |                        |                        |             |     |
| CakTSSR00735 | CakTC12564 | (ATG)5 | 1339 | 1353 | --        | Pseudo_ARR-B | TATGTCAATCGGAAACAACCTT | CATTGTTTTCTCTCTCTT     | 54.83,55.2  | 148 |
| CakTSSR00736 | CakTC12583 | (GAA)5 | 1315 | 1329 | --        | --           |                        |                        |             |     |

|              |            |           |      |      |            |    |                         |                        |             |     |
|--------------|------------|-----------|------|------|------------|----|-------------------------|------------------------|-------------|-----|
| CakTSSR00737 | CakTC12585 | (AG)7     | 646  | 659  | --         | -- | CATGGGAGAAACAAAAGTAGA   | CACATCACAGAAGAGGAGAAC  | 54.55,54.8  | 149 |
| CakTSSR00738 | CakTC12738 | (GAA)6    | 434  | 451  | --         | -- | TTCAATGTGTCATGTTACTGG   | TGAAAGAGTGGCTAAGCTAAA  | 54.44,54.81 | 148 |
| CakTSSR00739 | CakTC12740 | (CTT)5    | 197  | 211  | --         | -- |                         |                        |             |     |
| CakTSSR00740 | CakTC12778 | (TCA)5    | 46   | 60   | --         | -- |                         |                        |             |     |
| CakTSSR00741 | CakTC12823 | (GA)11    | 2    | 23   | --         | -- |                         |                        |             |     |
| CakTSSR00742 | CakTC12863 | (CT)6     | 7    | 18   | --         | -- |                         |                        |             |     |
| CakTSSR00743 | CakTC12875 | (GGA)5    | 7    | 21   | --         | -- |                         |                        |             |     |
| CakTSSR00744 | CakTC12877 | (CT)7     | 159  | 172  | --         | -- |                         |                        |             |     |
| CakTSSR00745 | CakTC12883 | (TA)6     | 1111 | 1122 | --         | -- |                         |                        |             |     |
| CakTSSR00746 | CakTC12927 | (TGG)5    | 19   | 33   | --         | -- |                         |                        |             |     |
| CakTSSR00747 | CakTC12937 | (GCTCAA)5 | 112  | 141  | --         | -- | AAACAAAGGAAGGAACAACAT   | TGTCCAATAATTAGGAGCTTG  | 55.38,54.7  | 153 |
| CakTSSR00748 | CakTC12979 | (GA)9     | 84   | 101  | Flower bud | -- |                         |                        |             |     |
| CakTSSR00749 | CakTC13023 | (ACA)6    | 1    | 18   | --         | -- |                         |                        |             |     |
| CakTSSR00750 | CakTC13080 | (AG)21    | 1458 | 1499 | --         | -- |                         |                        |             |     |
| CakTSSR00751 | CakTC13081 | (GGT)5    | 493  | 507  | --         | -- | CGGGTAGAAATCTTTTGTTT    | TCTCTGCACATACTGTTGTTG  | 55.25,54.85 | 151 |
| CakTSSR00752 | CakTC13120 | (AGA)6    | 855  | 872  | --         | -- | AATAAAGGAGGATTTTGATGG   | CTTGTTCTGCTACTTCCATTG  | 54.95,55.07 | 159 |
| CakTSSR00753 | CakTC13147 | (TCT)8    | 303  | 326  | --         | -- | CTCTGCCAAAACCTCTATCAA   | AGAAGAAGAAGAAGCGAAAAAC | 54.88,54.84 | 148 |
| CakTSSR00754 | CakTC13159 | (TCT)8    | 312  | 335  | --         | -- |                         |                        |             |     |
| CakTSSR00755 | CakTC13161 | (GAA)6    | 41   | 58   | --         | -- |                         |                        |             |     |
| CakTSSR00756 | CakTC13174 | (TA)6     | 389  | 400  | --         | -- |                         |                        |             |     |
| CakTSSR00757 | CakTC13187 | (TGA)8    | 595  | 618  | --         | -- | CTGAATTCGATTCGTTTGTA    | TTGCTTGATATGCTTCAAAC   | 55.57,55.31 | 150 |
| CakTSSR00758 | CakTC13269 | (GT)8     | 1256 | 1271 | --         | -- | CTAAAAATAGTGGGAAAATATGC | GAGTGTGTGAGATGGAAGAAA  | 52.79,54.47 | 151 |
| CakTSSR00759 | CakTC13273 | (TGA)5    | 594  | 608  | --         | -- |                         |                        |             |     |
| CakTSSR00760 | CakTC13317 | (TAA)14   | 1055 | 1096 | Flower bud | -- |                         |                        |             |     |
| CakTSSR00761 | CakTC13318 | (TA)11    | 101  | 122  | --         | -- | TGCGACGAGAGTAGATATTTT   | GAATTTTGCTTCTTTCCTTC   | 54.43,55.02 | 147 |
| CakTSSR00762 | CakTC13366 | (TTG)5    | 2    | 16   | --         | -- |                         |                        |             |     |
| CakTSSR00763 | CakTC13377 | (GTT)8    | 575  | 598  | --         | -- | TGCAACAGGGTTTAACTCTAA   | ACATAAGCACTCCACATGAAC  | 55.24,55.16 | 149 |
| CakTSSR00764 | CakTC13377 | (GT)9     | 938  | 955  | --         | -- |                         |                        |             |     |
| CakTSSR00765 | CakTC13388 | (TCA)8    | 646  | 669  | --         | -- |                         |                        |             |     |
| CakTSSR00766 | CakTC13440 | (AAT)6    | 493  | 510  | --         | -- |                         |                        |             |     |
| CakTSSR00767 | CakTC13449 | (AATAA)22 | 1    | 110  | --         | -- |                         |                        |             |     |
| CakTSSR00768 | CakTC13457 | (TC)7     | 293  | 306  | --         | -- |                         |                        |             |     |
| CakTSSR00769 | CakTC13502 | (AT)6     | 604  | 615  | --         | -- | CACCTTATCAAGTGGTTATGC   | ACTTTGCTTGGTGATTCTGT   | 54.86,54.84 | 135 |
| CakTSSR00770 | CakTC13523 | (TTTA)7   | 316  | 343  | --         | -- | TGCATATAATCCTAACCCACA   | TGGTGTGAACACGTACACTTA  | 55.65,55.08 | 148 |
| CakTSSR00771 | CakTC13531 | (TA)6     | 184  | 195  | --         | -- | TAATGACAGGATCTGTTTTC    | ACTTTACCTCCTCAGTTGCAG  | 54.29,56.22 | 150 |
| CakTSSR00772 | CakTC13532 | (AT)12    | 180  | 203  | --         | -- | GGAATTTGGTTGTAAGTAATCT  | GTCCTGAAATGATGGGATTAT  | 53.6,55.43  | 145 |
| CakTSSR00773 | CakTC13535 | (ATT)7    | 183  | 203  | --         | -- | CTCTTCCACTCAAAACAAC     | GACAAGAGAGTGTGAGATTG   | 54.92,54.98 | 152 |

|              |            |         |      |      |    |       |                        |                        |             |     |
|--------------|------------|---------|------|------|----|-------|------------------------|------------------------|-------------|-----|
| CakTSSR00774 | CakTC13535 | (CAA)5  | 322  | 336  | -- | --    | CATCAAATGCATTCTCTCATT  | TCAGTAGAAAACATGGGGATA  | 55.31,54.76 | 151 |
| CakTSSR00775 | CakTC13553 | (ATT)7  | 319  | 339  | -- | WRKY  | TATAAAGTGCTTGTGCAATGA  | CACCATTTCCTACTGTCACAC  | 54.66,55.51 | 150 |
| CakTSSR00776 | CakTC13564 | (TAAA)6 | 267  | 296  | -- | --    | AACGAATTGGAAGTACTAGTGG | TCCATAAAATACCCAATTAAGG | 55.21,55.04 | 145 |
| CakTSSR00777 | CakTC13570 | (CTT)14 | 245  | 286  | -- | --    | ATGCATCTTGGTACATGGTAA  | TAAGAGCCTATGACGATTCAA  | 55.55,55.24 | 152 |
| CakTSSR00778 | CakTC13615 | (ACA)6  | 339  | 356  | -- | --    |                        |                        |             |     |
| CakTSSR00779 | CakTC13642 | (TGT)5  | 83   | 97   | -- | --    |                        |                        |             |     |
| CakTSSR00780 | CakTC13656 | (ATG)5  | 437  | 451  | -- | --    | GTTTCATTGATCTTGTGGAAG  | TGTAGCATTAACTTGTGCTGA  | 54.77,54.72 | 149 |
| CakTSSR00781 | CakTC13669 | (AT)7   | 1112 | 1125 | -- | --    | TAACAATGGATATGACGGAAA  | TCCATTCCCTATTTTATTCC   | 55.61,54.9  | 144 |
| CakTSSR00782 | CakTC13669 | (AT)6   | 1569 | 1580 | -- | --    | GCAAAAATCCATTAAAGTTC   | CTTCCCTGTCGTGTAAAT     | 51.79,55.97 | 297 |
| CakTSSR00783 | CakTC13670 | (TTC)5  | 34   | 48   | -- | --    |                        |                        |             |     |
| CakTSSR00784 | CakTC13699 | (CCA)8  | 194  | 217  | -- | --    | CAATACCAAAACAATCTCTGC  | AGTTAGGTTGAAGTTGGTGGT  | 54.99,55.33 | 144 |
| CakTSSR00785 | CakTC13699 | (CAC)5  | 378  | 392  | -- | --    | AAGATTAAAGCTCATTCGTGA  | GATGGTAAATTGGATTGGAAG  | 54.4,56.07  | 152 |
| CakTSSR00786 | CakTC13704 | (AT)6   | 278  | 289  | -- | --    | CAAATGAGTATGATGGGAGAA  | GCGTTGGTGTATTTCATATGTT | 55.16,55.14 | 153 |
| CakTSSR00787 | CakTC13712 | (CAC)5  | 206  | 220  | -- | --    | GATATCATTTCCCATGAAA    | TCTCTTTCGTCTTTTGTGTT   | 54.82,54.34 | 150 |
| CakTSSR00788 | CakTC13764 | (TTC)6  | 290  | 307  | -- | --    | GGTAAACTCATCAAAGCACAG  | GTATGCACTTGTCACGTCTCT  | 55.05,55.57 | 164 |
| CakTSSR00789 | CakTC13853 | (TTG)6  | 45   | 62   | -- | --    |                        |                        |             |     |
| CakTSSR00790 | CakTC13886 | (CTT)8  | 263  | 286  | -- | LOB   | TCAAGAACTTTTCACCTTCAA  | GGTTGTTGTTTCTGTGATGAT  | 55.16,54.95 | 165 |
| CakTSSR00791 | CakTC13893 | (TA)6   | 312  | 323  | -- | --    | CCGAATTGTAATTTTTATACCG | CCAGATAGTAATTTCTCAATCA | 54.9,53.11  | 294 |
| CakTSSR00792 | CakTC13907 | (AT)7   | 657  | 670  | -- | --    | TGTAGGTCTAGCAATTTGGAC  | AATCTAACCATATCCCCATTC  | 54.58,54.59 | 141 |
| CakTSSR00793 | CakTC13908 | (GA)15  | 938  | 967  | -- | --    |                        |                        |             |     |
| CakTSSR00794 | CakTC13915 | (AT)6   | 230  | 241  | -- | --    | GAGACTCCAAAGACTGAGAG   | AGGGATTTCGATTGTATAGGAG | 55.67,54.97 | 153 |
| CakTSSR00795 | CakTC13920 | (GT)7   | 13   | 26   | -- | --    |                        |                        |             |     |
| CakTSSR00796 | CakTC13986 | (AT)6   | 231  | 242  | -- | --    | AAGTATGGGGACAAACTTCTT  | AAAACGAAGATGGGTAAGTGT  | 54.53,55.42 | 150 |
| CakTSSR00797 | CakTC13986 | (AG)6   | 812  | 823  | -- | --    |                        |                        |             |     |
| CakTSSR00798 | CakTC14001 | (CT)7   | 113  | 126  | -- | --    |                        |                        |             |     |
| CakTSSR00799 | CakTC14036 | (TCA)5  | 5    | 19   | -- | --    |                        |                        |             |     |
| CakTSSR00800 | CakTC14037 | (AG)8   | 1570 | 1585 | -- | --    |                        |                        |             |     |
| CakTSSR00801 | CakTC14051 | (TTC)23 | 455  | 523  | -- | --    |                        |                        |             |     |
| CakTSSR00802 | CakTC14070 | (AT)6   | 88   | 99   | -- | --    |                        |                        |             |     |
| CakTSSR00803 | CakTC14072 | (GAG)5  | 269  | 283  | -- | --    | TAGAACCGGAACCATACATC   | CTCCTTGAGGTTGTTCTTCTT  | 55,55.26    | 144 |
| CakTSSR00804 | CakTC14084 | (TCA)5  | 800  | 814  | -- | --    | AAGTTTCAACCCATCTTCATT  | GATTGCCTAGTGTGAGAAAA   | 55.31,54.7  | 155 |
| CakTSSR00805 | CakTC14087 | (TC)7   | 115  | 128  | -- | --    |                        |                        |             |     |
| CakTSSR00806 | CakTC14109 | (CAT)5  | 1160 | 1174 | -- | --    | TCCTCCACTAGTTCAAAAACA  | CGGAAGAAATAGTGAATGTTG  | 55.03,55    | 151 |
| CakTSSR00807 | CakTC14109 | (CAC)5  | 1583 | 1597 | -- | --    | TTCAATTTCTCCATCATCAAC  | AAAGTTCCAATTCGATCAGAC  | 55.11,55.87 | 152 |
| CakTSSR00808 | CakTC14109 | (TAT)5  | 1844 | 1858 | -- | --    |                        |                        |             |     |
| CakTSSR00809 | CakTC14154 | (AAT)5  | 83   | 97   | -- | PLATZ |                        |                        |             |     |
| CakTSSR00810 | CakTC14166 | (AG)7   | 768  | 781  | -- | --    |                        |                        |             |     |

|              |            |            |      |      |    |    |                        |                         |             |     |
|--------------|------------|------------|------|------|----|----|------------------------|-------------------------|-------------|-----|
| CakTSSR00811 | CakTC14201 | (TC)6      | 183  | 194  | -- | -- | ATAGCAGCATCACTGAGTCAC  | AAATTTGAAACCTTTCTCGTC   | 55.49,55.2  | 148 |
| CakTSSR00812 | CakTC14201 | (GAT)5     | 383  | 397  | -- | -- | CGAATCAGAAGAAAACAGAGA  | ACTTCCTCCATTAACACTTCC   | 54.82,54.9  | 152 |
| CakTSSR00813 | CakTC14219 | (AAC)5     | 205  | 219  | -- | -- | GGCATAGCCTTCATCTAAAAT  | CAGCAACAAAATAAAACCTC    | 55.27,54.36 | 149 |
| CakTSSR00814 | CakTC14285 | (TA)6      | 101  | 112  | -- | -- | CAITGGATTGGTTTATTGGTA  | GCATATTATGTGCAGTTTGAA   | 55.06,54.01 | 143 |
| CakTSSR00815 | CakTC14339 | (TA)13     | 139  | 164  | -- | -- | GGGAATTGTAGAGAGGAGAAA  | TGCCTATGAGTATCTTGCAT    | 55.12,55.1  | 173 |
| CakTSSR00816 | CakTC14367 | (AAG)5     | 672  | 686  | -- | -- |                        |                         |             |     |
| CakTSSR00817 | CakTC14371 | (CTC)5     | 673  | 687  | -- | -- | TCTTCCTTTTCTTGTGCCTAT  | TTAAGAGGGAGGCTAGTGATT   | 55.78,54.92 | 141 |
| CakTSSR00818 | CakTC14372 | (CAG)5     | 549  | 563  | -- | -- | ATGCGTGAATAAGGCTTCTCT  | CAACATCGTTCTTCTGTCAC    | 55.83,55.37 | 139 |
| CakTSSR00819 | CakTC14377 | (GAAA)5    | 215  | 234  | -- | -- | AGGAAGATTCTCTAACTCAAGC | TAAGCTCTTTCGGGTATTTT    | 54.48,55.11 | 154 |
| CakTSSR00820 | CakTC14407 | (AC)6      | 447  | 458  | -- | -- | TCGAAACATATACCGCTTTAC  | TATTC AATTCGTCATTCTGGT  | 54.74,54.74 | 147 |
| CakTSSR00821 | CakTC14412 | (AG)6      | 255  | 266  | -- | -- |                        |                         |             |     |
| CakTSSR00822 | CakTC14414 | (AG)8      | 856  | 871  | -- | -- |                        |                         |             |     |
| CakTSSR00823 | CakTC14440 | (TC)8      | 403  | 418  | -- | -- | AGTCTTAACAAGGTTCCATGC  | CACATGTGTTTCATCTCTCAA   | 55.97,54.54 | 138 |
| CakTSSR00824 | CakTC14444 | (TGA)5     | 1533 | 1547 | -- | -- |                        |                         |             |     |
| CakTSSR00825 | CakTC14469 | (AG)6      | 19   | 30   | -- | -- |                        |                         |             |     |
| CakTSSR00826 | CakTC14469 | (TAT)11    | 307  | 339  | -- | -- | TGATTTGAACTTCGACGTAAT  | ATTGTTTGAAATGACTTGCAC   | 54.99,55.3  | 154 |
| CakTSSR00827 | CakTC14515 | (TAC)7     | 119  | 139  | -- | -- | GAAGTTTTCTTCGATAGGAATG | GGTCTAAGGTTTTCTCATGCT   | 54.92,55.22 | 147 |
| CakTSSR00828 | CakTC14534 | (TCC)5     | 557  | 571  | -- | -- | TGGAGAGAGAGATTGTGACTG  | GTGAACAATTACTGCGTCTTT   | 55.43,54.65 | 154 |
| CakTSSR00829 | CakTC14562 | (ATC)5     | 441  | 455  | -- | -- | ACTTCATCACACATCTCCAAT  | GTGGCATCATCATCAAGTAAT   | 54.41,55    | 156 |
| CakTSSR00830 | CakTC14565 | (ATA)9     | 1455 | 1481 | -- | -- | TCTTCTTCTGTTTTGCATGAT  | TGTTGGTTTTACCAAAATGAG   | 55.1,55.33  | 154 |
| CakTSSR00831 | CakTC14573 | (CTC)6     | 413  | 430  | -- | -- | TTCTGGTATGGATTCATGTTT  | AGCAACTATATCTGGATGCAA   | 54.58,55.1  | 157 |
| CakTSSR00832 | CakTC14585 | (TA)6      | 143  | 154  | -- | -- | AATTTTGTATGATGATGGAC   | CTCAATTTTATTCCTAACAACCA | 52.29,55.29 | 145 |
| CakTSSR00833 | CakTC14588 | (CA)7      | 242  | 255  | -- | -- | CTTGATTGAATGCTTGAGACT  | TGTCAAGGATTGGATAGAAAA   | 54.67,54.89 | 156 |
| CakTSSR00834 | CakTC14599 | (TTTA)14   | 200  | 255  | -- | -- |                        |                         |             |     |
| CakTSSR00835 | CakTC14636 | (AAC)5     | 15   | 29   | -- | -- |                        |                         |             |     |
| CakTSSR00836 | CakTC14649 | (AAG)5     | 154  | 168  | -- | -- | CCATCTCTCAAACTCACAAG   | CTGAAATCTGTGTTCCAAAG    | 55.01,55.03 | 164 |
| CakTSSR00837 | CakTC14655 | (TAT)7     | 118  | 138  | -- | -- | AGATGTTGATTACTGCTTGGA  | AAGCAAGAAATTGATTGGA     | 54.97,55.02 | 149 |
| CakTSSR00838 | CakTC14662 | (AT)6      | 61   | 72   | -- | -- |                        |                         |             |     |
| CakTSSR00839 | CakTC14688 | (TTTTTC)5  | 605  | 629  | -- | -- |                        |                         |             |     |
| CakTSSR00840 | CakTC14712 | (ACA)6     | 377  | 394  | -- | -- | TTCCATCATAGACGACAGAAC  | TAGCCCTTTTAAATCATCTCC   | 55.22,55.25 | 173 |
| CakTSSR00841 | CakTC14739 | (TTTTTCC)5 | 343  | 372  | -- | -- | CACCAGTAGCAAACATTCTTC  | GATTCCAACAAGTTCAATCAA   | 55.05,55.19 | 154 |
| CakTSSR00842 | CakTC14747 | (CAC)5     | 35   | 49   | -- | -- |                        |                         |             |     |
| CakTSSR00843 | CakTC14761 | (TC)7      | 93   | 106  | -- | -- |                        |                         |             |     |
| CakTSSR00844 | CakTC14800 | (CTTT)5    | 5627 | 5646 | -- | -- | TCTGCTTTTGTCTCTGAGTAG  | TGAATGAATGACAGACTGA     | 54.94,54.98 | 173 |
| CakTSSR00845 | CakTC14823 | (ATT)6     | 133  | 150  | -- | -- | TGGTTTGGTTTTACTTTTGTG  | TGATTTCGTACCGTAGAAGAAG  | 55.41,54.75 | 179 |
| CakTSSR00846 | CakTC14837 | (TA)6      | 113  | 124  | -- | -- | GGCTTGTAATCTTACTTCCAC  | CACTCCAGATGGTTTGAATAA   | 54.87,55.24 | 160 |
| CakTSSR00847 | CakTC14860 | (TC)7      | 930  | 943  | -- | -- | TAAATCATGATGGGATTTCAG  | TGACCATAAGAATGGAATTTG   | 55.09,55.17 | 133 |

|              |            |         |      |      |           |       |                        |                       |             |     |
|--------------|------------|---------|------|------|-----------|-------|------------------------|-----------------------|-------------|-----|
| CakTSSR00848 | CakTC14908 | (TGG)5  | 187  | 201  | --        | --    | GAGAGTAGGGAGGTGTTTCATC | CTTTTCTTCGAATATCATCCA | 55.29,54.58 | 127 |
| CakTSSR00849 | CakTC14932 | (CAA)7  | 417  | 437  | --        | bHLH  | TCAACTGTTCAACAACATCCT  | GAGGAGGAGCACAAGAACTAT | 55.64,55.21 | 163 |
| CakTSSR00850 | CakTC14936 | (AT)6   | 26   | 37   | --        | --    |                        |                       |             |     |
| CakTSSR00851 | CakTC14998 | (AT)7   | 437  | 450  | --        | --    | AACCTTGCATACATAGGATGA  | TGTCTCCACAAGAGTCTGTIT | 54.78,54.89 | 195 |
| CakTSSR00852 | CakTC15015 | (GAT)63 | 407  | 595  | --        | --    |                        |                       |             |     |
| CakTSSR00853 | CakTC15022 | (TC)10  | 214  | 233  | --        | --    | CGAAAACGAAATAACAATCTG  | TATGAAGGGGTGGAGTTAAT  | 55.18,55.28 | 176 |
| CakTSSR00854 | CakTC15034 | (AAG)5  | 485  | 499  | --        | --    | TTTCTAGCAAGTTCATTGGAG  | GGTGTAATGTGAATACGAG   | 54.88,55.6  | 150 |
| CakTSSR00855 | CakTC15061 | (TAA)5  | 214  | 228  | --        | --    | CTCCTTTGCTAACTGAAAACA  | GCCAAATCATATTCTTGATG  | 54.96,54.85 | 176 |
| CakTSSR00856 | CakTC15138 | (AG)28  | 630  | 685  | --        | --    |                        |                       |             |     |
| CakTSSR00857 | CakTC15139 | (AG)29  | 85   | 142  | --        | --    |                        |                       |             |     |
| CakTSSR00858 | CakTC15150 | (TAC)6  | 2349 | 2366 | Shoot     | --    | TTTGAAGCTACGAAGAAGATG  | TTCTTCACAAAGCAACAATG  | 55.04,54.91 | 148 |
| CakTSSR00859 | CakTC15156 | (ATC)6  | 411  | 428  | --        | --    | CCATTAACCTAGCCACAACAC  | GAAGATCGGTTTGTAGTGAGA | 54.95,54.5  | 153 |
| CakTSSR00860 | CakTC15158 | (AGA)9  | 817  | 843  | --        | --    | GGCTTTGTCAAGAGAGAGAGT  | ATTCTCTCCTAATTGTCATT  | 55.4,54.7   | 147 |
| CakTSSR00861 | CakTC15169 | (CT)8   | 447  | 462  | --        | --    |                        |                       |             |     |
| CakTSSR00862 | CakTC15192 | (GAT)5  | 167  | 181  | --        | --    | GACAACAATCCAAATTATCCA  | AACAGCTAGAAGTGATGATGG | 55,54.54    | 149 |
| CakTSSR00863 | CakTC15201 | (GT)7   | 115  | 128  | --        | --    | GGGAGAGATTGCTTGAACAT   | AAACAAACCATGAGCCTTAAT | 55.14,55.5  | 156 |
| CakTSSR00864 | CakTC15214 | (GA)6   | 495  | 506  | --        | --    |                        |                       |             |     |
| CakTSSR00865 | CakTC15250 | (TTC)8  | 406  | 429  | --        | --    | AACCAATACAATGAATGATGC  | ACACATTCCACAGTATTACGC | 55.02,55.21 | 149 |
| CakTSSR00866 | CakTC15250 | (ATA)5  | 560  | 574  | --        | --    | GCGTAATACTGTGGAATGTGT  | AGGAGGTGGAACTCAAATA   | 55.21,55.47 | 153 |
| CakTSSR00867 | CakTC15258 | (GA)14  | 3523 | 3550 | --        | CAMTA | AGTCAATCCGTAAGAAGAAGC  | ATAGCGAAAACAACTGAAACA | 55.37,55.23 | 160 |
| CakTSSR00868 | CakTC15277 | (ATTA)8 | 56   | 87   | --        | --    |                        |                       |             |     |
| CakTSSR00869 | CakTC15283 | (AAT)5  | 77   | 91   | --        | --    |                        |                       |             |     |
| CakTSSR00870 | CakTC15296 | (AAT)6  | 390  | 407  | --        | --    |                        |                       |             |     |
| CakTSSR00871 | CakTC15340 | (TA)8   | 143  | 158  | --        | --    | CTTTGCAATTTGTCCTTACTT  | AACAATTACCGTTGATTGAAG | 53.96,54.45 | 152 |
| CakTSSR00872 | CakTC15360 | (AAT)7  | 405  | 425  | --        | --    | TGCCAGAAAGTATGATGAGTT  | CTAAAGACAAGCAAGCAACTG | 54.97,55.63 | 151 |
| CakTSSR00873 | CakTC15361 | (ATT)7  | 179  | 199  | --        | --    | CTAAAGACAAGCAAGCAACTG  | TGCCAGAAAGTATGATGAGTT | 55.63,54.97 | 151 |
| CakTSSR00874 | CakTC15365 | (TC)6   | 190  | 201  | --        | --    | GCAAGCTTAATTAACACACACA | CCTTCAAGGAAGAGCTTTTAT | 55.01,54.68 | 157 |
| CakTSSR00875 | CakTC15389 | (GGT)5  | 182  | 196  | --        | --    | GGAATAGTTCGAGTTTGTGGT  | TCAACGACCTGAATAAAGAA  | 55.08,55.13 | 157 |
| CakTSSR00876 | CakTC15393 | (ATC)6  | 1430 | 1447 | --        | --    | TGAGCTTCATTGAGTAGAA    | TCTCATCTAGCAAAAGGAAAA | 55.28,54.54 | 154 |
| CakTSSR00877 | CakTC15393 | (AC)9   | 2562 | 2579 | --        | --    |                        |                       |             |     |
| CakTSSR00878 | CakTC15408 | (TA)24  | 1    | 48   | --        | --    |                        |                       |             |     |
| CakTSSR00879 | CakTC15412 | (ATA)7  | 885  | 905  | --        | --    |                        |                       |             |     |
| CakTSSR00880 | CakTC15447 | (AT)7   | 463  | 476  | --        | --    | ATCTCCAGAGGCTTATAGACG  | TTGATGGACACATTCTTCAAT | 55.34,55.48 | 164 |
| CakTSSR00881 | CakTC15453 | (CAC)6  | 232  | 249  | Young_pod | --    | TTTATTCCTCCACTCTATCC   | AACTCGCCAATAGAGTTAGT  | 54.93,54.87 | 152 |
| CakTSSR00882 | CakTC15461 | (TC)6   | 23   | 34   | --        | --    |                        |                       |             |     |
| CakTSSR00883 | CakTC15466 | (AG)7   | 518  | 531  | --        | --    |                        |                       |             |     |
| CakTSSR00884 | CakTC15477 | (AG)6   | 84   | 95   | --        | --    |                        |                       |             |     |

|              |            |          |      |      |       |          |                        |                        |             |     |
|--------------|------------|----------|------|------|-------|----------|------------------------|------------------------|-------------|-----|
| CakTSSR00885 | CakTC15508 | (AGA)7   | 222  | 242  | --    | --       |                        |                        |             |     |
| CakTSSR00886 | CakTC15524 | (TC)7    | 5    | 18   | --    | --       |                        |                        |             |     |
| CakTSSR00887 | CakTC15544 | (AAC)5   | 225  | 239  | --    | --       | ACAACAACAACAGAGAACGAC  | TTTCTCTTTGACGTTTACA    | 55.28,55.21 | 140 |
| CakTSSR00888 | CakTC15586 | (AGA)7   | 204  | 224  | --    | --       | CGAGAAGAACAAAATTCATCA  | ACCGGAATCACTGTTACCTAT  | 55.53,55.22 | 156 |
| CakTSSR00889 | CakTC15637 | (TAA)8   | 14   | 37   | --    | --       |                        |                        |             |     |
| CakTSSR00890 | CakTC15639 | (TAT)29  | 319  | 405  | --    | --       |                        |                        |             |     |
| CakTSSR00891 | CakTC15645 | (AT)7    | 635  | 648  | --    | --       | CATTACATCTTTCATTGTG    | AAGAAAGGGATCCTTCTATCC  | 54.07,55.54 | 180 |
| CakTSSR00892 | CakTC15662 | (TA)6    | 249  | 260  | --    | --       |                        |                        |             |     |
| CakTSSR00893 | CakTC15683 | (AT)7    | 1    | 14   | Shoot | --       |                        |                        |             |     |
| CakTSSR00894 | CakTC15730 | (TTA)27  | 174  | 254  | --    | --       |                        |                        |             |     |
| CakTSSR00895 | CakTC15736 | (CCT)5   | 195  | 209  | --    | --       | AGGTGTAAAGGCTCTACTCG   | ACATTGTTTGACCTTCTACA   | 55.49,54.72 | 156 |
| CakTSSR00896 | CakTC15766 | (CAA)6   | 1    | 18   | --    | C2C2-Dof |                        |                        |             |     |
| CakTSSR00897 | CakTC15774 | (TA)21   | 127  | 168  | --    | --       |                        |                        |             |     |
| CakTSSR00898 | CakTC15781 | (TG)6    | 208  | 219  | --    | --       | GGAAAATAGGGAGGATAAAAA  | TTAGCAAGATCGAAACAACAT  | 54.28,55.15 | 154 |
| CakTSSR00899 | CakTC15812 | (TAA)5   | 268  | 282  | --    | --       |                        |                        |             |     |
| CakTSSR00900 | CakTC15813 | (AT)7    | 291  | 304  | --    | --       |                        |                        |             |     |
| CakTSSR00901 | CakTC15824 | (TTC)5   | 264  | 278  | --    | SBP      | CACAAATCTCACAATACTTTGG | AGTGACTCCTTTATTGTTGGTT | 54.94,54.62 | 150 |
| CakTSSR00902 | CakTC15834 | (CTT)5   | 292  | 306  | --    | SRS      | TGTAACATGCTTCATCTCAA   | CCGAAACAGTGTATGAATT    | 54.42,54.45 | 140 |
| CakTSSR00903 | CakTC15848 | (ATT)14  | 1    | 42   | --    | --       |                        |                        |             |     |
| CakTSSR00904 | CakTC15850 | (TTCCT)5 | 65   | 89   | --    | --       |                        |                        |             |     |
| CakTSSR00905 | CakTC15850 | (CA)6    | 426  | 437  | --    | --       | TATGACTTTGGAGCATAACT   | TGAACCTTATGTGTTGATT    | 55.02,54.67 | 217 |
| CakTSSR00906 | CakTC15850 | (AG)7    | 898  | 911  | --    | --       |                        |                        |             |     |
| CakTSSR00907 | CakTC15860 | (CTT)5   | 43   | 57   | --    | --       |                        |                        |             |     |
| CakTSSR00908 | CakTC15904 | (TGAT)6  | 267  | 290  | --    | --       | TGTCTGTGTCAGTGCTTCATA  | GTGAGGCATTACCTTCTTCTT  | 55.29,55.22 | 152 |
| CakTSSR00909 | CakTC15909 | (TA)9    | 455  | 472  | --    | --       | TCTATAATGCAGGTGAAGGAA  | AAACAAAGAACTGACAATCCT  | 55.08,54.74 | 147 |
| CakTSSR00910 | CakTC15922 | (TGG)5   | 239  | 253  | --    | --       | ATAACACAACAAAGGTCATGG  | GTCGGTTTCTAATGAACCTCT  | 55.02,55.06 | 155 |
| CakTSSR00911 | CakTC15933 | (TCC)5   | 114  | 128  | --    | --       | TCTAAAAGTAAATGGAGCAATG | ACAACCTTGAATTGGGTAAAG  | 54.11,55.82 | 151 |
| CakTSSR00912 | CakTC15934 | (AAG)5   | 357  | 371  | --    | --       |                        |                        |             |     |
| CakTSSR00913 | CakTC15942 | (TGT)5   | 229  | 243  | --    | --       | GGTTATATGGCTTTTCCAAAT  | TTTTATCCAAACAGTCCATA   | 54.99,54.78 | 146 |
| CakTSSR00914 | CakTC15944 | (TC)10   | 67   | 86   | --    | Jumonji  |                        |                        |             |     |
| CakTSSR00915 | CakTC15968 | (TC)7    | 30   | 43   | --    | --       |                        |                        |             |     |
| CakTSSR00916 | CakTC15978 | (CA)7    | 151  | 164  | --    | --       | AGTTCGTCCTCAGTAGTAGTCC | TACAAGTTCAGTTCGATGAGC  | 55,55.63    | 147 |
| CakTSSR00917 | CakTC15993 | (AC)6    | 382  | 393  | --    | --       | TCTAGTCCTGAGACACCAGAA  | TGTTGATTTTCCACCGATACT  | 54.99,54.83 | 151 |
| CakTSSR00918 | CakTC16009 | (ATC)5   | 1198 | 1212 | --    | --       | GATGAAGACGAAGACACAAGA  | AAGTGGGTTATGATGATTGTG  | 55.42,54.93 | 139 |
| CakTSSR00919 | CakTC16009 | (ATAA)5  | 1792 | 1811 | --    | --       | CAAACAAAACCCTAGTTTCA   | TTTTCAGGGTAGGATAAAACC  | 54.67,55.03 | 149 |
| CakTSSR00920 | CakTC16009 | (GAA)8   | 2050 | 2073 | --    | --       |                        |                        |             |     |
| CakTSSR00921 | CakTC16012 | (CAG)5   | 1925 | 1939 | --    | --       | ACATCAAGCGTATTACCACAT  | GTGCAATTGAATATAATGCT   | 54.73,54.65 | 148 |

|              |            |           |      |      |      |             |                        |                       |             |     |
|--------------|------------|-----------|------|------|------|-------------|------------------------|-----------------------|-------------|-----|
| CakTSSR00922 | CakTC16067 | (ATT)10   | 91   | 120  | --   | --          |                        |                       |             |     |
| CakTSSR00923 | CakTC16067 | (ACT)5    | 984  | 998  | --   | --          |                        |                       |             |     |
| CakTSSR00924 | CakTC16078 | (TA)9     | 59   | 76   | --   | --          |                        |                       |             |     |
| CakTSSR00925 | CakTC16078 | (AT)6     | 375  | 386  | --   | --          | CCITCATAAAAGTAGTGGGTGT | AACTGAATGGATTTCAACTG  | 55.06,54.38 | 150 |
| CakTSSR00926 | CakTC16085 | (GA)6     | 423  | 434  | --   | --          |                        |                       |             |     |
| CakTSSR00927 | CakTC16122 | (TGT)5    | 108  | 122  | --   | NAC         | CAAGCTGAGGAAGCTGTATAA  | GATCTAATCTCAAGGCAACCT | 55.07,55.14 | 145 |
| CakTSSR00928 | CakTC16142 | (GT)6     | 266  | 277  | --   | AUX/IAA     | AATAAAAGGTGTTGGGGTAG   | GCATTCTGATTTCTGTTTG   | 54.99,55.12 | 143 |
| CakTSSR00929 | CakTC16142 | (TCA)5    | 982  | 996  | --   | AUX/IAA     | TCCACCAAGTAGTGAAGATTG  | CCTTCATAGGTTGATTGATG  | 55.31,54.76 | 152 |
| CakTSSR00930 | CakTC16173 | (ACTA)5   | 392  | 411  | --   | --          | TCCATTTTAATCTAACGGTTG  | TGGGTTTCTAATTAGCATGT  | 54.57,54.16 | 200 |
| CakTSSR00931 | CakTC16179 | (GAAA)5   | 423  | 442  | --   | --          | GTGGAACCTCAATTTGTTTCA  | CACAACATGTCTCAGTTAGGG | 55.28,55.69 | 153 |
| CakTSSR00932 | CakTC16195 | (TCT)7    | 81   | 101  | --   | --          |                        |                       |             |     |
| CakTSSR00933 | CakTC16207 | (TTG)5    | 653  | 667  | --   | --          |                        |                       |             |     |
| CakTSSR00934 | CakTC16210 | (TA)10    | 259  | 278  | --   | --          |                        |                       |             |     |
| CakTSSR00935 | CakTC16229 | (TTA)5    | 78   | 92   | --   | --          |                        |                       |             |     |
| CakTSSR00936 | CakTC16239 | (GT)6     | 359  | 370  | --   | --          | GGTCAACACCAATCTGTAAAC  | TCTTAACCTGTTGGGCTTAT  | 54.54,55.66 | 151 |
| CakTSSR00937 | CakTC16327 | (AC)6     | 73   | 84   | --   | C3H         |                        |                       |             |     |
| CakTSSR00938 | CakTC16349 | (TGT)6    | 21   | 38   | --   | --          |                        |                       |             |     |
| CakTSSR00939 | CakTC16349 | (ATT)11   | 213  | 245  | --   | --          | ATAATTTGGTTGTGTGGAACA  | AATTTATCCCAACCATCACT  | 55.44,55.12 | 165 |
| CakTSSR00940 | CakTC16349 | (GAT)6    | 445  | 462  | --   | --          | GGAATTTGGTGATGATTTTC   | CAACATATGAAGGAACACACA | 56.03,54.44 | 149 |
| CakTSSR00941 | CakTC16359 | (GA)6     | 353  | 364  | --   | --          | ATGTTTGTCAACTACGAAAGC  | CAATATTGTTGCTCTCCTCTG | 54.65,55.15 | 149 |
| CakTSSR00942 | CakTC16388 | (AC)6     | 537  | 548  | --   | --          |                        |                       |             |     |
| CakTSSR00943 | CakTC16399 | (AG)8     | 139  | 154  | --   | --          | TTGTTGTTGTTGGTGTCTGTA  | AGCATCATCCTATCTCATTCA | 55.04,54.8  | 176 |
| CakTSSR00944 | CakTC16425 | (AAAT)8   | 72   | 103  | --   | --          |                        |                       |             |     |
| CakTSSR00945 | CakTC16433 | (GA)8     | 509  | 524  | --   | --          | CTACAGCATCCAGAGAGAAAA  | CTTGTGGGTCACACTTCTATC | 54.85,54.69 | 142 |
| CakTSSR00946 | CakTC16449 | (CTT)6    | 113  | 130  | --   | MYB-related | ACAAGAGCAAAAATCTCCTTT  | AGAATCGAAATGAAAGAGGAA | 54.96,55.67 | 152 |
| CakTSSR00947 | CakTC16455 | (GAA)5    | 218  | 232  | --   | --          | AGAGCCACTGTCCTCTCTG    | GAATGATTCAATTTCTGCTCA | 55.42,55.44 | 150 |
| CakTSSR00948 | CakTC16460 | (TG)6     | 419  | 430  | --   | --          | GATATTGGATGGAAGGGTAAC  | TTCTTAAATTGCGTTTGCTAC | 55.04,55.09 | 148 |
| CakTSSR00949 | CakTC16475 | (GGT)7    | 99   | 119  | --   | --          |                        |                       |             |     |
| CakTSSR00950 | CakTC16480 | (GA)6     | 5949 | 5960 | Root | --          |                        |                       |             |     |
| CakTSSR00951 | CakTC16487 | (CTT)6    | 3154 | 3171 | --   | CCAAT       | TCITTTATCTTCTGCAAAACCA | CAAGAGCAAGAACAAGAAGAG | 55.29,54.64 | 149 |
| CakTSSR00952 | CakTC16497 | (AG)8     | 152  | 167  | --   | --          | TCTACATGTTGCAGCTAGAGTC | TGGAATAATTGAGAACCAAGT | 54.97,54.76 | 154 |
| CakTSSR00953 | CakTC16513 | (CCA)5    | 518  | 532  | --   | --          | AGAAGCCGTACAATAACCATT  | AGGAGGAGATTGTAAACTGG  | 55.53,55.07 | 150 |
| CakTSSR00954 | CakTC16514 | (GAA)7    | 9    | 29   | --   | --          |                        |                       |             |     |
| CakTSSR00955 | CakTC16549 | (TTC)6    | 216  | 233  | --   | --          | TTGCGTTATTACTCGACATTT  | CTCGGATGCGTAACACAAC   | 55.2,55.95  | 152 |
| CakTSSR00956 | CakTC16578 | (AG)7     | 167  | 180  | --   | --          | TCCCTTTTATAAGACCCACT   | CCCCTTAATTTATGATTGACA | 54.64,55.22 | 166 |
| CakTSSR00957 | CakTC16627 | (GTTGGA)5 | 240  | 269  | --   | --          | ATGTTGTTGGAGTTGGATGT   | CGAACAAAACCTAAAGGACTA | 55.23,54.8  | 152 |
| CakTSSR00958 | CakTC16639 | (CT)6     | 1138 | 1149 | --   | --          | CAITATTTTCTCCTCTTGCT   | GAGATATGACTGCTGTTAGGC | 55.32,54.22 | 144 |

|              |            |        |      |      |    |           |                        |                       |             |     |
|--------------|------------|--------|------|------|----|-----------|------------------------|-----------------------|-------------|-----|
| CakTSSR00959 | CakTC16672 | (CTT)5 | 150  | 164  | -- | --        | CTCCTCAAACCTTTTCAACT   | GCAGAAAAATAACAAGCAGAA | 55.27,55.04 | 151 |
| CakTSSR00960 | CakTC16681 | (CAC)5 | 494  | 508  | -- | --        | ATTGATGGATTCACTTCAAGA  | GAGCTACATACCAAGGTGTTG | 54.68,54.93 | 141 |
| CakTSSR00961 | CakTC16759 | (CAG)5 | 52   | 66   | -- | --        |                        |                       |             |     |
| CakTSSR00962 | CakTC16766 | (CT)10 | 37   | 56   | -- | --        |                        |                       |             |     |
| CakTSSR00963 | CakTC16784 | (AT)10 | 199  | 218  | -- | --        | TGATCTCACAGGCATTCTAC   | CACCCAGTGATATTCTTATGC | 55.38,54.78 | 157 |
| CakTSSR00964 | CakTC16813 | (TCT)5 | 246  | 260  | -- | --        | ATGATTGTGGAAATAGCAGTG  | CACATAGTCCAACTCCAATC  | 55.26,54.64 | 151 |
| CakTSSR00965 | CakTC16824 | (AT)7  | 283  | 296  | -- | --        |                        |                       |             |     |
| CakTSSR00966 | CakTC16838 | (AT)9  | 286  | 303  | -- | --        | TTCTTTAGCATCTCATTGTCC  | TTCTACCGTTCTATGTTTTCG | 54.62,54.78 | 132 |
| CakTSSR00967 | CakTC16841 | (AT)10 | 93   | 112  | -- | --        |                        |                       |             |     |
| CakTSSR00968 | CakTC16846 | (CTT)5 | 187  | 201  | -- | --        | AAATGGTTCACCTTCTTTTTC  | TCCATCTTTATGCTTCATGTT | 55.04,54.91 | 152 |
| CakTSSR00969 | CakTC16847 | (TCT)8 | 450  | 473  | -- | AP2-EREBP |                        |                       |             |     |
| CakTSSR00970 | CakTC16863 | (ATA)7 | 430  | 450  | -- | --        | TGTTCTTGTTCTTCTTTCACC  | TCCCAATAGTATCCATGACTG | 54.56,55.03 | 147 |
| CakTSSR00971 | CakTC16867 | (AT)8  | 49   | 64   | -- | --        |                        |                       |             |     |
| CakTSSR00972 | CakTC16867 | (AAC)5 | 291  | 305  | -- | --        |                        |                       |             |     |
| CakTSSR00973 | CakTC16869 | (AAT)6 | 313  | 330  | -- | CCAAT     | TTCAGAATGCTTCTTTTCATC  | TAAAGCACCACCAGAATTAG  | 54.74,54.78 | 149 |
| CakTSSR00974 | CakTC16873 | (AT)11 | 172  | 193  | -- | --        | AAACCACACTAGCAGTCTTGA  | CCAACACTTAGTCTGGAATCA | 55.12,55.31 | 145 |
| CakTSSR00975 | CakTC16897 | (TC)10 | 200  | 219  | -- | --        |                        |                       |             |     |
| CakTSSR00976 | CakTC16937 | (TA)6  | 41   | 52   | -- | --        |                        |                       |             |     |
| CakTSSR00977 | CakTC16957 | (AG)6  | 541  | 552  | -- | C2C2-Dof  | CAAATAGCTTAATCCCTTGGT  | AAGCGCTTCTTTAATATTTC  | 55.21,54.82 | 142 |
| CakTSSR00978 | CakTC16981 | (GGT)6 | 609  | 626  | -- | --        | GATGGAGGAGGTGGTAGATAG  | GCCTCTCCAACACTCATAACT | 55.26,55.98 | 156 |
| CakTSSR00979 | CakTC16981 | (GA)13 | 732  | 757  | -- | --        | GTGTTAAGGTGACGGAGATG   | ATCGTTACCTCACACAGACAC | 55.58,55.05 | 152 |
| CakTSSR00980 | CakTC16985 | (AT)7  | 402  | 415  | -- | --        |                        |                       |             |     |
| CakTSSR00981 | CakTC16989 | (GT)6  | 7    | 18   | -- | --        |                        |                       |             |     |
| CakTSSR00982 | CakTC17026 | (AG)8  | 15   | 30   | -- | --        |                        |                       |             |     |
| CakTSSR00983 | CakTC17026 | (GCC)8 | 381  | 404  | -- | --        |                        |                       |             |     |
| CakTSSR00984 | CakTC17095 | (TGC)5 | 286  | 300  | -- | --        | AGGTGTACTTTTGGAGGTGT   | ATAACTATAATGCGGCACAAC | 55.33,54.61 | 155 |
| CakTSSR00985 | CakTC17136 | (AG)6  | 1216 | 1227 | -- | --        | CTCCATTGTTGGAATACAAG   | CGATGTAGACGAAGTTTTCAC | 54.9,55.05  | 144 |
| CakTSSR00986 | CakTC17152 | (AG)6  | 143  | 154  | -- | --        | ATAGAGGTTGACCCCGATAAT  | TCACAAGTGGCAGTTAGTTCT | 56.57,55.12 | 136 |
| CakTSSR00987 | CakTC17182 | (TAG)5 | 404  | 418  | -- | --        |                        |                       |             |     |
| CakTSSR00988 | CakTC17256 | (TC)7  | 19   | 32   | -- | --        |                        |                       |             |     |
| CakTSSR00989 | CakTC17280 | (AGA)6 | 15   | 32   | -- | --        |                        |                       |             |     |
| CakTSSR00990 | CakTC17308 | (TA)9  | 204  | 221  | -- | --        |                        |                       |             |     |
| CakTSSR00991 | CakTC17347 | (AAC)6 | 288  | 305  | -- | --        | TTAACTGATCCACCCATACAC  | GGGGTAGAAAGAAGGTTAAAG | 54.93,54.02 | 146 |
| CakTSSR00992 | CakTC17374 | (CAA)5 | 323  | 337  | -- | --        |                        |                       |             |     |
| CakTSSR00993 | CakTC17379 | (TC)7  | 242  | 255  | -- | bHLH      | GAAAGAAAACAAAAGTGAATGC | GTTGTTCACTCTGGACATCAT | 55.82,54.86 | 152 |
| CakTSSR00994 | CakTC17397 | (TG)7  | 3    | 16   | -- | --        |                        |                       |             |     |
| CakTSSR00995 | CakTC17400 | (CTC)5 | 523  | 537  | -- | --        | CGTAAATTCTACAAGGACGTG  | TTAGAAATGCAATAGGGACAA | 55.12,55.1  | 151 |

|              |            |         |      |      |            |    |                        |                       |             |     |
|--------------|------------|---------|------|------|------------|----|------------------------|-----------------------|-------------|-----|
| CakTSSR00996 | CakTC17420 | (AG)40  | 165  | 244  | --         | -- |                        |                       |             |     |
| CakTSSR00997 | CakTC17443 | (TAT)6  | 367  | 384  | --         | -- | CGGTCACTGCCTATACAAATA  | AGAATGAACCGAACCTGTTAT | 55.48,55.34 | 158 |
| CakTSSR00998 | CakTC17453 | (GT)10  | 80   | 99   | --         | -- |                        |                       |             |     |
| CakTSSR00999 | CakTC17471 | (CAT)5  | 9    | 23   | --         | -- |                        |                       |             |     |
| CakTSSR01000 | CakTC17501 | (AAG)5  | 32   | 46   | --         | -- |                        |                       |             |     |
| CakTSSR01001 | CakTC17534 | (TTA)9  | 157  | 183  | Flower bud | HB | GCTTCCTTTGTTCTGAGTTTC  | GAAGAATGAGAATGCAAAATG | 55.84,55.03 | 131 |
| CakTSSR01002 | CakTC17534 | (AG)6   | 368  | 379  | Flower bud | HB | AATCACACATCCTTCTCACAA  | CAAAAACAAACGAAGAAGAAG | 55.56,54.55 | 149 |
| CakTSSR01003 | CakTC17552 | (TA)6   | 1357 | 1368 | --         | -- |                        |                       |             |     |
| CakTSSR01004 | CakTC17568 | (AGA)6  | 1954 | 1971 | --         | -- |                        |                       |             |     |
| CakTSSR01005 | CakTC17576 | (TA)15  | 94   | 123  | --         | -- |                        |                       |             |     |
| CakTSSR01006 | CakTC17583 | (AAT)5  | 320  | 334  | --         | -- |                        |                       |             |     |
| CakTSSR01007 | CakTC17587 | (AGA)5  | 278  | 292  | --         | -- | TTTCTCTTTGAATGTGGTGTT  | CCTCACTCTCAACAATGTTTC | 54.85,54.83 | 148 |
| CakTSSR01008 | CakTC17588 | (TTTA)5 | 59   | 78   | --         | -- |                        |                       |             |     |
| CakTSSR01009 | CakTC17613 | (ATC)5  | 3558 | 3572 | --         | -- | TAAGGATGCTTCGAGTAACTG  | CTCCCAATTATCCCTCTCTTA | 54.91,55.1  | 161 |
| CakTSSR01010 | CakTC17617 | (TC)7   | 13   | 26   | --         | -- |                        |                       |             |     |
| CakTSSR01011 | CakTC17641 | (AT)13  | 41   | 66   | --         | -- |                        |                       |             |     |
| CakTSSR01012 | CakTC17677 | (TG)6   | 420  | 431  | --         | -- | CTTAACATTTCCTCAAGTT    | TTGGGTAGATCTTTCATCCTT | 55.09,55.4  | 152 |
| CakTSSR01013 | CakTC17684 | (TA)7   | 115  | 128  | --         | -- | TGATTCTGAGCACAAAGTGTTA | TGATTCCATTGAGATTGAGA  | 54.48,55.71 | 143 |
| CakTSSR01014 | CakTC17701 | (GTT)6  | 452  | 469  | --         | -- | GGATAGGAATAAGGATTGGAG  | ACCAACCCTAACAACAGAATC | 54.48,55.66 | 150 |
| CakTSSR01015 | CakTC17778 | (AAT)12 | 195  | 230  | --         | -- | TGCTAAAATCCTATTTTGAGGT | GTTTTCAGGCTCAAAGTTAT  | 54.97,55.23 | 239 |
| CakTSSR01016 | CakTC17812 | (GGA)5  | 720  | 734  | --         | -- |                        |                       |             |     |
| CakTSSR01017 | CakTC17850 | (TCT)9  | 191  | 217  | --         | -- | ATATCAATGGCCTTAATCTCC  | TTCAAAGCATGATTCTGAGAC | 54.9,55.52  | 152 |
| CakTSSR01018 | CakTC17855 | (TA)6   | 87   | 98   | --         | -- |                        |                       |             |     |
| CakTSSR01019 | CakTC17859 | (GAA)5  | 471  | 485  | --         | -- |                        |                       |             |     |
| CakTSSR01020 | CakTC17881 | (TAA)5  | 391  | 405  | --         | -- | GCATGACATAACATATGGACA  | CCACACGTTTATTTAGTTGG  | 54.31,54.98 | 162 |
| CakTSSR01021 | CakTC17884 | (TA)6   | 130  | 141  | --         | -- | TATGAGCAATTACACGAATG   | CACGACATGTATTGTGAGAAA | 54.03,54.61 | 149 |
| CakTSSR01022 | CakTC17969 | (AT)16  | 288  | 319  | --         | -- |                        |                       |             |     |
| CakTSSR01023 | CakTC17979 | (TTC)6  | 386  | 403  | --         | -- |                        |                       |             |     |
| CakTSSR01024 | CakTC17990 | (TTAT)5 | 51   | 70   | --         | -- |                        |                       |             |     |
| CakTSSR01025 | CakTC18018 | (TC)7   | 26   | 39   | --         | -- |                        |                       |             |     |
| CakTSSR01026 | CakTC18050 | (TCA)6  | 134  | 151  | --         | -- | TTCTTCTTCATCAGAGTTGGA  | CTTACTTCAAAGGGAGATGGT | 55.06,55.07 | 134 |
| CakTSSR01027 | CakTC18073 | (AT)11  | 393  | 414  | --         | -- |                        |                       |             |     |
| CakTSSR01028 | CakTC18076 | (TTA)18 | 1031 | 1084 | --         | -- |                        |                       |             |     |
| CakTSSR01029 | CakTC18136 | (ATG)5  | 585  | 599  | --         | -- | CTCCCAATTATCCCTCTCTTA  | TAAGGATGCTTCGAGTAACTG | 55.1,54.91  | 161 |
| CakTSSR01030 | CakTC18176 | (AT)8   | 397  | 412  | --         | -- |                        |                       |             |     |
| CakTSSR01031 | CakTC18178 | (TA)6   | 464  | 475  | --         | -- |                        |                       |             |     |
| CakTSSR01032 | CakTC18212 | (CA)6   | 244  | 255  | --         | -- | ACCCTCTTACTTCAATTGGTC  | TAGAGCTGGAAGGAGTATGTG | 54.9,54.72  | 127 |

|              |            |           |      |      |            |     |                       |                        |             |     |
|--------------|------------|-----------|------|------|------------|-----|-----------------------|------------------------|-------------|-----|
| CakTSSR01033 | CakTC18231 | (CT)18    | 102  | 137  | --         | --  |                       |                        |             |     |
| CakTSSR01034 | CakTC18239 | (AG)7     | 1713 | 1726 | --         | --  |                       |                        |             |     |
| CakTSSR01035 | CakTC18268 | (TC)10    | 446  | 465  | --         | --  |                       |                        |             |     |
| CakTSSR01036 | CakTC18272 | (AAT)5    | 239  | 253  | --         | --  | GTTATCCAATTCATCAATCCA | TGTGTTAGCTGACATTGAAG   | 54.92,54.07 | 154 |
| CakTSSR01037 | CakTC18277 | (CTT)15   | 142  | 186  | --         | --  |                       |                        |             |     |
| CakTSSR01038 | CakTC18308 | (TAA)5    | 2    | 16   | --         | --  |                       |                        |             |     |
| CakTSSR01039 | CakTC18313 | (GCT)6    | 87   | 104  | --         | --  |                       |                        |             |     |
| CakTSSR01040 | CakTC18354 | (GA)8     | 188  | 203  | --         | --  | GCTTTCAACTTTTATTGTCCA | GCTACTTGGCTTGGAGTAAGT  | 54.73,55.48 | 142 |
| CakTSSR01041 | CakTC18364 | (TGT)5    | 485  | 499  | --         | C3H |                       |                        |             |     |
| CakTSSR01042 | CakTC18371 | (TC)12    | 138  | 161  | --         | --  |                       |                        |             |     |
| CakTSSR01043 | CakTC18396 | (TA)8     | 149  | 164  | --         | --  | ATCATTTAATCTCAGCCCTTT | TTTGCTAATGCAGAACAGATT  | 54.7,55.31  | 150 |
| CakTSSR01044 | CakTC18399 | (CT)6     | 121  | 132  | --         | --  |                       |                        |             |     |
| CakTSSR01045 | CakTC18420 | (AC)9     | 282  | 299  | --         | --  | ATACACAAAGAGGGAAAATGC | TTTCTTGATGTGTGACGTGTA  | 55.89,55.13 | 140 |
| CakTSSR01046 | CakTC18489 | (TGT)6    | 191  | 208  | --         | --  | GACATCTTTTCGGTTGTTC   | TGTTTCGGTAAGAAATTCAAG  | 54.74,54.74 | 148 |
| CakTSSR01047 | CakTC18494 | (TA)17    | 118  | 151  | --         | --  |                       |                        |             |     |
| CakTSSR01048 | CakTC18551 | (AGAGA)5  | 333  | 357  | --         | --  | GTGGTAACTGGTAACTGATGC | GGAGTTAGAGAGGAGGTGACT  | 54.75,54.16 | 154 |
| CakTSSR01049 | CakTC18552 | (AG)8     | 19   | 34   | --         | --  |                       |                        |             |     |
| CakTSSR01050 | CakTC18558 | (AG)6     | 27   | 38   | --         | --  |                       |                        |             |     |
| CakTSSR01051 | CakTC18643 | (TTA)5    | 30   | 44   | --         | --  |                       |                        |             |     |
| CakTSSR01052 | CakTC18662 | (CAG)5    | 1623 | 1637 | --         | --  | TCTTGTTCTCTGATCTTCAA  | CTTTGTAGTTCGTGCGATT    | 55.08,54.82 | 152 |
| CakTSSR01053 | CakTC18664 | (AT)13    | 229  | 254  | --         | --  |                       |                        |             |     |
| CakTSSR01054 | CakTC18688 | (GA)17    | 1131 | 1164 | --         | --  | AGATAGCTCTTTCAGCATCC  | TTGTATTGTGTTTGTGTTGTGA | 55.45,55.07 | 150 |
| CakTSSR01055 | CakTC18688 | (CAT)5    | 1289 | 1303 | --         | --  | TCTTGATCTTGAAAACCTCAA | CCTTCTCCATCCATTATTCTT  | 55.08,54.93 | 168 |
| CakTSSR01056 | CakTC18707 | (ATA)5    | 56   | 70   | --         | --  |                       |                        |             |     |
| CakTSSR01057 | CakTC18720 | (TA)6     | 98   | 109  | --         | --  |                       |                        |             |     |
| CakTSSR01058 | CakTC18778 | (TAC)5    | 69   | 83   | --         | --  |                       |                        |             |     |
| CakTSSR01059 | CakTC18786 | (TA)15    | 70   | 99   | --         | --  |                       |                        |             |     |
| CakTSSR01060 | CakTC18808 | (TGTTGA)5 | 256  | 285  | --         | --  | ATCACTGGAAGGATGTTTTTC | TGTGAAATGTTTGTCTGAATG  | 55.71,54.57 | 159 |
| CakTSSR01061 | CakTC18837 | (AG)23    | 136  | 181  | --         | --  |                       |                        |             |     |
| CakTSSR01062 | CakTC18862 | (TC)11    | 390  | 411  | --         | --  |                       |                        |             |     |
| CakTSSR01063 | CakTC18871 | (AT)15    | 2    | 31   | --         | --  |                       |                        |             |     |
| CakTSSR01064 | CakTC18881 | (TA)11    | 11   | 32   | --         | --  |                       |                        |             |     |
| CakTSSR01065 | CakTC18885 | (TC)9     | 96   | 113  | --         | --  |                       |                        |             |     |
| CakTSSR01066 | CakTC18931 | (TTAGGG)6 | 451  | 486  | Flower bud | --  | CTTGATTAAGCGTGGAGATTA | ACACGTTTTTCTCCTCAAAA   | 54.85,55.01 | 158 |
| CakTSSR01067 | CakTC18944 | (GTG)5    | 37   | 51   | --         | --  |                       |                        |             |     |
| CakTSSR01068 | CakTC18978 | (CT)6     | 530  | 541  | --         | LUG |                       |                        |             |     |
| CakTSSR01069 | CakTC18994 | (TA)9     | 139  | 156  | --         | --  | AGGGTTTTAGAGGACTGACT  | AGGTGAGTTGGGACTTGTTAT  | 56.04,55.25 | 164 |

|              |            |         |      |      |            |       |                        |                        |             |     |
|--------------|------------|---------|------|------|------------|-------|------------------------|------------------------|-------------|-----|
| CakTSSR01070 | CakTC19019 | (TCT)9  | 103  | 129  | --         | --    |                        |                        |             |     |
| CakTSSR01071 | CakTC19110 | (TTG)6  | 369  | 386  | --         | --    | GGTGATCTAGGGTTCCTTCTA  | GCATACTCAGAATCAGGACAC  | 54.99,54.76 | 158 |
| CakTSSR01072 | CakTC19190 | (TA)6   | 177  | 188  | --         | --    | CGTGGCGACGGTATATTA     | TTGTAACAACACGATAGAATCA | 55.57,53.5  | 198 |
| CakTSSR01073 | CakTC19248 | (TG)7   | 329  | 342  | --         | --    | GCCTGATTACCTCTCAAAGT   | TGAAACTGTTGTTCATACCC   | 55.22,55.15 | 154 |
| CakTSSR01074 | CakTC19278 | (TAA)6  | 74   | 91   | --         | --    |                        |                        |             |     |
| CakTSSR01075 | CakTC19330 | (GAA)5  | 309  | 323  | --         | --    |                        |                        |             |     |
| CakTSSR01076 | CakTC19404 | (TTA)5  | 398  | 412  | --         | --    |                        |                        |             |     |
| CakTSSR01077 | CakTC19413 | (TC)21  | 3    | 44   | --         | --    |                        |                        |             |     |
| CakTSSR01078 | CakTC19435 | (TTA)5  | 446  | 460  | --         | --    |                        |                        |             |     |
| CakTSSR01079 | CakTC19467 | (AAC)5  | 25   | 39   | --         | --    |                        |                        |             |     |
| CakTSSR01080 | CakTC19470 | (TA)14  | 378  | 405  | --         | --    |                        |                        |             |     |
| CakTSSR01081 | CakTC19510 | (TG)6   | 148  | 159  | --         | --    | TTGATGGTATTCTGTGTTAAGG | TCGAGTAGCATCATATGACAA  | 54.47,54.37 | 145 |
| CakTSSR01082 | CakTC19539 | (GA)9   | 94   | 111  | --         | --    |                        |                        |             |     |
| CakTSSR01083 | CakTC19605 | (TAA)6  | 211  | 228  | --         | --    | ATATCTTGGGGTTGAGTTAGG  | AGGATCCAGGATTTTGTAAC   | 54.89,54.84 | 150 |
| CakTSSR01084 | CakTC19626 | (GA)7   | 435  | 448  | --         | --    |                        |                        |             |     |
| CakTSSR01085 | CakTC19657 | (TC)9   | 382  | 399  | --         | --    |                        |                        |             |     |
| CakTSSR01086 | CakTC19669 | (TCT)6  | 481  | 498  | --         | CCAAT |                        |                        |             |     |
| CakTSSR01087 | CakTC19704 | (AGA)6  | 8    | 25   | --         | --    |                        |                        |             |     |
| CakTSSR01088 | CakTC19723 | (TTC)6  | 32   | 49   | --         | --    |                        |                        |             |     |
| CakTSSR01089 | CakTC19843 | (AT)16  | 97   | 128  | --         | --    |                        |                        |             |     |
| CakTSSR01090 | CakTC20109 | (AT)7   | 407  | 420  | --         | --    |                        |                        |             |     |
| CakTSSR01091 | CakTC20149 | (GAA)6  | 2221 | 2238 | Flower bud | --    |                        |                        |             |     |
| CakTSSR01092 | CakTC20157 | (AG)8   | 1923 | 1938 | --         | --    | TGGTCATAGATTCCAGAAGAA  | ACTATGGCAACATCCAAATC   | 54.86,54.99 | 166 |
| CakTSSR01093 | CakTC20157 | (CCT)6  | 3038 | 3055 | --         | --    | GCCATCAGAACCTATTGATAA  | GCATTTCTTTCTCTATGGAT   | 54.44,55.08 | 159 |
| CakTSSR01094 | CakTC20161 | (ATT)5  | 2757 | 2771 | --         | C3H   | TGCATACTTTCAAAAGCAGTT  | TTAACCTGTGGTTCAGCTTAC  | 55.39,54.66 | 148 |
| CakTSSR01095 | CakTC20165 | (GAA)6  | 1264 | 1281 | Young_pod  | --    | AGGTTCTCTTCGGTTTAAAG   | CTATTTCACTCCACCTCACA   | 54.6,55.23  | 152 |
| CakTSSR01096 | CakTC20168 | (GAA)6  | 1582 | 1599 | --         | --    | ACATGCAATCTAACTCTGGAA  | TCCAACCTCTCTCTATTTC    | 54.97,55.1  | 157 |
| CakTSSR01097 | CakTC20168 | (AGA)6  | 1743 | 1760 | --         | --    |                        |                        |             |     |
| CakTSSR01098 | CakTC20171 | (TC)7   | 77   | 90   | --         | --    |                        |                        |             |     |
| CakTSSR01099 | CakTC20211 | (TC)7   | 515  | 528  | --         | --    |                        |                        |             |     |
| CakTSSR01100 | CakTC20264 | (AG)6   | 872  | 883  | --         | --    | TCCTTGATCTTAGCTGTCTA   | GGAACAAGTCAAGTGTCTCTG  | 55.47,54.92 | 129 |
| CakTSSR01101 | CakTC20273 | (AT)8   | 455  | 470  | --         | --    |                        |                        |             |     |
| CakTSSR01102 | CakTC20305 | (TG)6   | 556  | 567  | --         | --    | AAATCCTTCGGTGTTCCTTAG  | TCTTCCTTCCTGACTTACTC   | 55.24,55.18 | 144 |
| CakTSSR01103 | CakTC20315 | (TA)6   | 202  | 213  | --         | --    |                        |                        |             |     |
| CakTSSR01104 | CakTC20356 | (AAAT)5 | 301  | 320  | --         | --    |                        |                        |             |     |
| CakTSSR01105 | CakTC20393 | (ATA)6  | 66   | 83   | --         | --    |                        |                        |             |     |
| CakTSSR01106 | CakTC20428 | (AT)6   | 4    | 15   | --         | --    |                        |                        |             |     |

|              |            |         |      |      |    |         |                        |                         |             |     |
|--------------|------------|---------|------|------|----|---------|------------------------|-------------------------|-------------|-----|
| CakTSSR01107 | CakTC20433 | (TC)11  | 21   | 42   | -- | --      |                        |                         |             |     |
| CakTSSR01108 | CakTC20467 | (GTT)6  | 457  | 474  | -- | --      |                        |                         |             |     |
| CakTSSR01109 | CakTC20581 | (AT)9   | 91   | 108  | -- | --      |                        |                         |             |     |
| CakTSSR01110 | CakTC20721 | (CAT)6  | 181  | 198  | -- | --      | TCACATCATAAAGTTCCACAA  | AGGGAATTCAATAAGGAAGA    | 54.07,54.68 | 150 |
| CakTSSR01111 | CakTC20726 | (TC)6   | 12   | 23   | -- | --      |                        |                         |             |     |
| CakTSSR01112 | CakTC20727 | (GA)9   | 118  | 135  | -- | --      | AGGGACATGAGACAATAGAGAG | TCCTCACTAAACCATAGGACA   | 55.07,54.82 | 159 |
| CakTSSR01113 | CakTC20743 | (GA)6   | 30   | 41   | -- | --      |                        |                         |             |     |
| CakTSSR01114 | CakTC20743 | (TTA)6  | 247  | 264  | -- | --      | TCTTCAATTACATCACTGTCGT | GAAGTTGGAGGTGGTTTAAAT   | 54.9,54.92  | 145 |
| CakTSSR01115 | CakTC20830 | (CT)7   | 25   | 38   | -- | --      |                        |                         |             |     |
| CakTSSR01116 | CakTC20831 | (CGG)5  | 563  | 577  | -- | --      |                        |                         |             |     |
| CakTSSR01117 | CakTC20872 | (AC)6   | 181  | 192  | -- | --      | CCAGAGGTCTTTATTTTCGATT | TGGACACAGACGAGACTAGAG   | 55.16,55.55 | 165 |
| CakTSSR01118 | CakTC20975 | (GAA)8  | 229  | 252  | -- | --      |                        |                         |             |     |
| CakTSSR01119 | CakTC21008 | (TC)8   | 92   | 107  | -- | --      |                        |                         |             |     |
| CakTSSR01120 | CakTC21047 | (GGA)5  | 432  | 446  | -- | --      | CAAATTATTCGATCTGGACTG  | ATCCATTTCCTGAGGAGTTT    | 54.92,55.21 | 153 |
| CakTSSR01121 | CakTC21065 | (ATT)6  | 1    | 18   | -- | --      |                        |                         |             |     |
| CakTSSR01122 | CakTC21083 | (CAC)5  | 340  | 354  | -- | --      | TAAATGAAAAACCATGTGAG   | ATTATTATCTGAAAGGGTTCG   | 55.25,52.86 | 184 |
| CakTSSR01123 | CakTC21085 | (CA)18  | 201  | 236  | -- | --      |                        |                         |             |     |
| CakTSSR01124 | CakTC21114 | (AG)19  | 383  | 420  | -- | --      |                        |                         |             |     |
| CakTSSR01125 | CakTC21141 | (AT)15  | 338  | 367  | -- | --      |                        |                         |             |     |
| CakTSSR01126 | CakTC21175 | (AT)9   | 158  | 175  | -- | --      | TGACTTGTGTGATGTCTCACTG | ACCATCGACAACAGTATGAAC   | 54.6,54.99  | 148 |
| CakTSSR01127 | CakTC21185 | (TCA)5  | 272  | 286  | -- | --      |                        |                         |             |     |
| CakTSSR01128 | CakTC21186 | (TTA)6  | 117  | 134  | -- | --      | AACCCATTTTCAAAGACAAC   | ACTTGCAGAAAGAAAGGATCT   | 55.38,54.94 | 148 |
| CakTSSR01129 | CakTC21236 | (TG)6   | 126  | 137  | -- | --      | TCTGTCTAGACAAAACACTGC  | GTCATGAAAACCTGATTCAAA   | 54.86,55.19 | 154 |
| CakTSSR01130 | CakTC21258 | (AGA)5  | 49   | 63   | -- | --      |                        |                         |             |     |
| CakTSSR01131 | CakTC21263 | (TG)7   | 143  | 156  | -- | --      | CAITTTCTCTGGGGTTTAT    | GACCCAGAAAACCTTATTTGTAA | 55.01,54.54 | 161 |
| CakTSSR01132 | CakTC21280 | (AT)10  | 20   | 39   | -- | --      |                        |                         |             |     |
| CakTSSR01133 | CakTC21281 | (TA)8   | 365  | 380  | -- | --      |                        |                         |             |     |
| CakTSSR01134 | CakTC21312 | (CTT)5  | 223  | 237  | -- | --      | GGTGGCCAACTCTTATTTTCT  | CCTTTTCCTTCTTCTCTCAC    | 55.23,54.92 | 150 |
| CakTSSR01135 | CakTC21344 | (TA)6   | 295  | 306  | -- | --      | TTCATTTTATTCGGATTGCT   | GTCAACGAATCCCGTAT       | 55,55.69    | 154 |
| CakTSSR01136 | CakTC21402 | (CT)11  | 366  | 387  | -- | --      |                        |                         |             |     |
| CakTSSR01137 | CakTC21426 | (AT)6   | 31   | 42   | -- | --      |                        |                         |             |     |
| CakTSSR01138 | CakTC21459 | (AT)6   | 2161 | 2172 | -- | --      | CCTTCCATCCTCATCAATAGT  | GCTGAACTTTGTGGAAAATTA   | 55.68,54.73 | 157 |
| CakTSSR01139 | CakTC21459 | (AG)21  | 2559 | 2600 | -- | --      |                        |                         |             |     |
| CakTSSR01140 | CakTC21486 | (AC)9   | 318  | 335  | -- | --      |                        |                         |             |     |
| CakTSSR01141 | CakTC21487 | (CT)8   | 381  | 396  | -- | --      |                        |                         |             |     |
| CakTSSR01142 | CakTC21534 | (GTTA)6 | 263  | 286  | -- | --      | ATGAAAGAGAGAGAGGGAAAA  | CTCACTTCATTCAATCAACATC  | 54.83,54.78 | 144 |
| CakTSSR01143 | CakTC21540 | (CA)10  | 666  | 685  | -- | G2-like |                        |                         |             |     |

|              |            |         |      |      |            |           |                        |                        |             |     |
|--------------|------------|---------|------|------|------------|-----------|------------------------|------------------------|-------------|-----|
| CakTSSR01144 | CakTC21543 | (TCT)5  | 441  | 455  | --         | AUX/IAA   | GGCTTCTCAATGTAAAACCTCA | GAGTGAGAGATTTTCGGATT   | 54.7,55.18  | 151 |
| CakTSSR01145 | CakTC21544 | (AG)19  | 437  | 474  | --         | --        |                        |                        |             |     |
| CakTSSR01146 | CakTC21556 | (GA)11  | 1055 | 1076 | --         | --        | GTTTTAGAGGAAGAGCTGGTT  | ACTCTCTCTACCCCTCCCTCTC | 54.56,55.69 | 146 |
| CakTSSR01147 | CakTC21561 | (GAA)5  | 238  | 252  | --         | --        | TCCCAAATTCGAAATCTCTAT  | ATTCTGTTCTCTTCCGACT    | 55.48,54.78 | 163 |
| CakTSSR01148 | CakTC21568 | (TCA)6  | 372  | 389  | --         | --        |                        |                        |             |     |
| CakTSSR01149 | CakTC21576 | (CTT)7  | 2    | 22   | --         | --        |                        |                        |             |     |
| CakTSSR01150 | CakTC21628 | (TTG)5  | 103  | 117  | --         | --        | GTGTTTTCGATGACTGTTGTT  | GAAGCTCATCAAAAGAACGTA  | 55.2,54.86  | 114 |
| CakTSSR01151 | CakTC21640 | (ATA)7  | 127  | 147  | --         | --        | CGGATTTTAAGAAAGTGTCC   | ATGACACAAGAAAGTTGGAAG  | 55.63,54.43 | 151 |
| CakTSSR01152 | CakTC21644 | (GAA)6  | 267  | 284  | --         | --        |                        |                        |             |     |
| CakTSSR01153 | CakTC21661 | (GC)6   | 95   | 106  | --         | --        |                        |                        |             |     |
| CakTSSR01154 | CakTC21693 | (TA)8   | 225  | 240  | --         | --        |                        |                        |             |     |
| CakTSSR01155 | CakTC21716 | (TTA)22 | 399  | 464  | --         | --        |                        |                        |             |     |
| CakTSSR01156 | CakTC21719 | (CTT)6  | 3    | 20   | --         | --        |                        |                        |             |     |
| CakTSSR01157 | CakTC21737 | (TAT)5  | 189  | 203  | --         | --        | GGGTGTGTGCTCATACTATTT  | ACTCCAATTGATTGTCCTTCT  | 54.27,55.3  | 154 |
| CakTSSR01158 | CakTC21748 | (AT)9   | 81   | 98   | --         | --        |                        |                        |             |     |
| CakTSSR01159 | CakTC21748 | (AGA)9  | 324  | 350  | --         | --        | TATCTCCAGCATCCAAAATA   | TCCTTGTGTCTTCTTCTGCTA  | 55.02,55.35 | 151 |
| CakTSSR01160 | CakTC21815 | (GAC)6  | 319  | 336  | --         | --        | GAACCAACAGTAATCCACGTA  | CTTCAGCTGACTTTGACAATC  | 55.18,55.17 | 178 |
| CakTSSR01161 | CakTC21848 | (CT)8   | 107  | 122  | --         | --        | CTTTCTCTGATCCTTTTCGAT  | GATGCCATGATATTGAATCTG  | 55.27,55.52 | 154 |
| CakTSSR01162 | CakTC21873 | (TA)7   | 320  | 333  | --         | --        | ATGTCATCCGACAAGTGATTA  | CTAATTAATGGGGAACAGGT   | 55.52,54.91 | 167 |
| CakTSSR01163 | CakTC21950 | (AG)14  | 204  | 231  | --         | --        |                        |                        |             |     |
| CakTSSR01164 | CakTC21971 | (ATT)6  | 35   | 52   | --         | --        |                        |                        |             |     |
| CakTSSR01165 | CakTC22035 | (CT)6   | 344  | 355  | --         | --        | TAACCTCTGGCCATAGTTCAA  | CCAGAAAACCAAGTGCATCTA  | 55.16,55.31 | 162 |
| CakTSSR01166 | CakTC22037 | (TAG)5  | 172  | 186  | --         | --        | CACTTTTTATAAGGCACTCGT  | AGTTTGACAAGTTTGCTCTTG  | 54,54.85    | 188 |
| CakTSSR01167 | CakTC22092 | (AT)18  | 310  | 345  | --         | AP2-EREBP |                        |                        |             |     |
| CakTSSR01168 | CakTC22158 | (TAT)5  | 364  | 378  | --         | --        |                        |                        |             |     |
| CakTSSR01169 | CakTC22163 | (TG)9   | 14   | 31   | --         | --        |                        |                        |             |     |
| CakTSSR01170 | CakTC22178 | (ATT)5  | 21   | 35   | --         | --        |                        |                        |             |     |
| CakTSSR01171 | CakTC22186 | (TC)7   | 230  | 243  | --         | --        | AGTTGAACTGGAAGTGATCTG  | TGTTTTCGGAAAAGTGAATA   | 54.39,55.02 | 155 |
| CakTSSR01172 | CakTC22198 | (AT)6   | 158  | 169  | --         | --        | GCTTTGAAGTTCCATCACATA  | GCAGAAATTGTTCAATTCAAG  | 55.39,55.12 | 159 |
| CakTSSR01173 | CakTC22202 | (TC)11  | 349  | 370  | --         | --        |                        |                        |             |     |
| CakTSSR01174 | CakTC22227 | (TA)7   | 149  | 162  | --         | --        | TCAAGACCATGAAGATGATTC  | GGGAGTACTGGTAGGGATTTA  | 55.09,54.89 | 150 |
| CakTSSR01175 | CakTC22239 | (CCA)8  | 1552 | 1575 | Flower bud | --        | ATTAAGGGAAAGGAAGAACAC  | GACTACCTTTTGAGGAGTTG   | 54.2,55.55  | 159 |
| CakTSSR01176 | CakTC22244 | (AGA)7  | 352  | 372  | --         | --        |                        |                        |             |     |
| CakTSSR01177 | CakTC22247 | (ATA)6  | 136  | 153  | --         | --        | CAAACACATCAACGACAAGTA  | CCCTTGATCTGATTTTCATT   | 54.7,55.8   | 150 |
| CakTSSR01178 | CakTC22251 | (ATT)5  | 2077 | 2091 | --         | --        |                        |                        |             |     |
| CakTSSR01179 | CakTC22256 | (TTA)6  | 2279 | 2296 | --         | --        | CCCTTGATCTGATTTTCATT   | CAAACACATCAACGACAAGTA  | 55.8,54.7   | 150 |
| CakTSSR01180 | CakTC22276 | (GGA)5  | 1129 | 1143 | --         | --        | GTGTATGGGGAATAGGAGATG  | TCCACCACCACTACTACAAA   | 55.96,54.81 | 154 |

|              |            |           |      |      |             |             |                        |                        |             |     |
|--------------|------------|-----------|------|------|-------------|-------------|------------------------|------------------------|-------------|-----|
| CakTSSR01181 | CakTC22297 | (TTC)6    | 366  | 383  | --          | --          | TCTAGCATTGTGGGATCTA    | TTTCGTCATGTGTCTCTTTTT  | 55.08,55.02 | 155 |
| CakTSSR01182 | CakTC22297 | (GT)6     | 2022 | 2033 | --          | --          | TTATTGTGTTTGGTGGGAAGAG | GCAACAACCTCTCACTCATCTC | 55.32,54.96 | 150 |
| CakTSSR01183 | CakTC22302 | (TCA)8    | 2538 | 2561 | --          | --          | ATTCTCTGTGCAAAAACGTGAC | TCAACCGTTTCTATTCTCAA   | 54.58,55.13 | 150 |
| CakTSSR01184 | CakTC22312 | (GGA)5    | 1220 | 1234 | --          | --          | ATGGAGGGTTTGATATCACTT  | TATTACAAGTCCACCACCA    | 55.11,55.61 | 145 |
| CakTSSR01185 | CakTC22317 | (CTC)5    | 567  | 581  | --          | --          | ATCACCACCACCTCCATAC    | GGGTGGTGACTTGTAGACATA  | 55.43,55    | 136 |
| CakTSSR01186 | CakTC22350 | (ATA)9    | 265  | 291  | --          | --          | CCACCTTCAAGGAAGAGATTA  | AGCAAGGGAGGAATTATTAGA  | 56.04,54.87 | 152 |
| CakTSSR01187 | CakTC22355 | (ATC)5    | 756  | 770  | --          | --          | AACAGCTAGAAGTGATGATGG  | GACAACAATCCAAATTATCCA  | 54.54,55    | 149 |
| CakTSSR01188 | CakTC22357 | (CAT)6    | 2714 | 2731 | --          | --          | ATCCTTCTTCCCTTTGTTA    | TGAGGATTGTGATGGTAGAAG  | 54.76,55.23 | 152 |
| CakTSSR01189 | CakTC22358 | (GGA)5    | 762  | 776  | Root        | --          | GGGTGGTGACTTGTAGACATA  | ATCACCACCACCTCCATAC    | 55,55.43    | 136 |
| CakTSSR01190 | CakTC22362 | (TGG)5    | 1239 | 1253 | --          | --          | TGGTGGAGAGTGATAATGGTA  | CTAAGGTGTACCCCTCCAGTTT | 55.53,55.03 | 143 |
| CakTSSR01191 | CakTC22364 | (CAT)5    | 811  | 825  | --          | --          | AGCACAATAGGTTTAACTCG   | TCAAAGTTCAAGCTGAATGAT  | 54,55.1     | 149 |
| CakTSSR01192 | CakTC22393 | (CAC)5    | 323  | 337  | --          | --          |                        |                        |             |     |
| CakTSSR01193 | CakTC22397 | (AT)7     | 4088 | 4101 | Young_pod   | CCHC        | CTTGCTGTTTGTCTGTTTAT   | AGCATAGGAAATGAAAGCATA  | 55,54.39    | 155 |
| CakTSSR01194 | CakTC22417 | (CT)6     | 44   | 55   | --          | --          |                        |                        |             |     |
| CakTSSR01195 | CakTC22448 | (CAA)7    | 249  | 269  | --          | --          | CTCTGACCAAATTCGAAATAA  | AATTCGTGAAGACTCGTTCT   | 54.66,55.69 | 150 |
| CakTSSR01196 | CakTC22449 | (AT)11    | 6568 | 6589 | Mature Leaf | --          | ATGTCTTGGTGTTTGTGTGT   | TGTGCAGTGTATCAGATCAAA  | 54.63,55.21 | 160 |
| CakTSSR01197 | CakTC22470 | (CA)8     | 1214 | 1229 | --          | --          | GAGTTGTTGAGATGGAAGAAA  | TATGCATATGATGAAGAGTCA  | 54.47,51.64 | 131 |
| CakTSSR01198 | CakTC22484 | (CTT)7    | 1706 | 1726 | Young_pod   | --          | GAATTAGGGTTAGGGATTGAA  | GTTTCCAGCTTCTTTAGCTT   | 54.95,54.89 | 163 |
| CakTSSR01199 | CakTC22484 | (CTT)6    | 1896 | 1913 | Young_pod   | --          | TGATCATCATCAACGACATA   | TCTCACCATCTAGAAATCA    | 54.88,54.86 | 145 |
| CakTSSR01200 | CakTC22489 | (GT)7     | 911  | 924  | --          | --          | TACTGTGTGACTGTTCAACCA  | GAGTTGTTGAGATGGAAGAAA  | 55.02,54.47 | 162 |
| CakTSSR01201 | CakTC22519 | (AG)6     | 69   | 80   | --          | --          |                        |                        |             |     |
| CakTSSR01202 | CakTC22519 | (AGA)5    | 330  | 344  | --          | --          |                        |                        |             |     |
| CakTSSR01203 | CakTC22521 | (TC)6     | 139  | 150  | --          | WI/SNF-BAF6 | CTCTCAAATCCTCACTCTCC   | GTCTTGAAAGATGGAAGCAC   | 55.59,54.89 | 151 |
| CakTSSR01204 | CakTC22521 | (CA)6     | 1081 | 1092 | --          | WI/SNF-BAF6 | TTTCCTCTGTATTTCATCG    | GGTGTTTGAGGAGACATTTTT  | 54.66,55.78 | 154 |
| CakTSSR01205 | CakTC22555 | (AG)8     | 957  | 972  | --          | --          | TGGGAGAGGAGAGGATATTAG  | TTCTAACGGTGCCTTTAACTT  | 55.08,55.88 | 145 |
| CakTSSR01206 | CakTC22560 | (AG)6     | 5339 | 5350 | --          | --          |                        |                        |             |     |
| CakTSSR01207 | CakTC22585 | (TC)6     | 94   | 105  | --          | --          |                        |                        |             |     |
| CakTSSR01208 | CakTC22596 | (TA)8     | 224  | 239  | --          | --          | GCTCGATAAACTTTAAAGCA   | ATGGCAATTACAACAATCACT  | 54.39,54.69 | 155 |
| CakTSSR01209 | CakTC22607 | (TAGTCG)5 | 169  | 198  | --          | --          | CGTAGTCGTAGTCGTAGTCGT  | GGATGTGGGTAAAACAACAC   | 54.79,55.24 | 184 |
| CakTSSR01210 | CakTC22621 | (GGT)6    | 466  | 483  | --          | --          | TGGGCGTAGCTATGAGTATAA  | TAATATAGCTGCTGCAATCC   | 55.32,54.97 | 145 |
| CakTSSR01211 | CakTC22631 | (TTA)5    | 1619 | 1633 | --          | --          | TTATCTGAAAGTGAATCACAA  | TCTCTAGATGCTTCTGGGTTA  | 54.98,54.38 | 165 |
| CakTSSR01212 | CakTC22633 | (CAA)6    | 187  | 204  | --          | SET         | AACCTTCGAGAGTTCCCTA    | AAACTGGTGATGGTGAAATTA  | 55.62,54.67 | 152 |
| CakTSSR01213 | CakTC22634 | (CAC)7    | 36   | 56   | --          | --          |                        |                        |             |     |
| CakTSSR01214 | CakTC22634 | (TA)11    | 1274 | 1295 | --          | --          | TAAGTGGGAATAGTCTTTGA   | ACAGAGAACAAGTCTTCAACA  | 55.16,54.23 | 165 |
| CakTSSR01215 | CakTC22636 | (GTG)6    | 1191 | 1208 | --          | --          | ATTGGTTGTCTCTCTGGGTAT  | CAAGACTAAGCATAGGAACGA  | 55.17,54.91 | 151 |
| CakTSSR01216 | CakTC22636 | (TTA)5    | 2564 | 2578 | --          | --          |                        |                        |             |     |
| CakTSSR01217 | CakTC22643 | (TAT)7    | 602  | 622  | --          | --          | CATTAGGAACATGGAATGAAA  | AACCCTTAATCAATTCACCTC  | 55.17,54.84 | 159 |

|              |            |           |      |      |            |     |                        |                       |             |     |
|--------------|------------|-----------|------|------|------------|-----|------------------------|-----------------------|-------------|-----|
| CakTSSR01218 | CakTC22646 | (CAT)6    | 64   | 81   | --         | --  |                        |                       |             |     |
| CakTSSR01219 | CakTC22648 | (AAT)6    | 348  | 365  | --         | --  | ACCGAAATACAACACTTGAAA  | CAAGTTGTAATCAGAGCCATT | 54.91,54.58 | 157 |
| CakTSSR01220 | CakTC22670 | (TA)8     | 1889 | 1904 | --         | --  |                        |                       |             |     |
| CakTSSR01221 | CakTC22672 | (TA)8     | 61   | 76   | --         | --  |                        |                       |             |     |
| CakTSSR01222 | CakTC22738 | (GGA)5    | 775  | 789  | --         | --  | GAGGTGGAGGTTATAATCGTG  | CTCCACCACTACCGTATCC   | 56.19,55.35 | 177 |
| CakTSSR01223 | CakTC22739 | (CT)9     | 28   | 45   | --         | --  |                        |                       |             |     |
| CakTSSR01224 | CakTC22739 | (GGT)5    | 651  | 665  | --         | --  |                        |                       |             |     |
| CakTSSR01225 | CakTC22742 | (GGT)5    | 803  | 817  | --         | --  | TACAATAGAAGCAGTGGTGGT  | ACACTAATCTCTCCAGTTTCC | 54.93,52.56 | 177 |
| CakTSSR01226 | CakTC22745 | (TCC)5    | 106  | 120  | --         | --  | CTCCACCACTACCCGTATC    | GAGGTGGAGGTTATAATCGTG | 55.35,56.19 | 177 |
| CakTSSR01227 | CakTC22746 | (GA)12    | 341  | 364  | --         | --  | GCTGCTGTTCTTATTGTTGTT  | CGATATTTCTTCTCTCTCC   | 54.81,54.81 | 149 |
| CakTSSR01228 | CakTC22762 | (AG)6     | 93   | 104  | --         | --  |                        |                       |             |     |
| CakTSSR01229 | CakTC22768 | (GTGA)9   | 1580 | 1615 | --         | --  |                        |                       |             |     |
| CakTSSR01230 | CakTC22769 | (TTC)7    | 453  | 473  | --         | --  | CCACCTCTATCGTTTCTCTTT  | AGAGGGTTTTGAGTATTGAGA | 55.23,54.83 | 138 |
| CakTSSR01231 | CakTC22784 | (TCT)8    | 226  | 249  | --         | --  | CTCTGCCAAAACCTTCTATCAA | AGAAGAAGAAGAAGCGAAAAC | 54.88,54.84 | 148 |
| CakTSSR01232 | CakTC22785 | (AAG)5    | 447  | 461  | --         | --  | TAGAGAGACATGGCACAAAAT  | ACACTTTCTCAACTGAAGCAG | 54.97,54.82 | 166 |
| CakTSSR01233 | CakTC22787 | (TCT)8    | 552  | 575  | --         | --  | CTCTGCCAAAACCTTCTATCAA | GAAGAAGAAGAAGCGAAAAC  | 54.88,55.23 | 149 |
| CakTSSR01234 | CakTC22795 | (GAA)6    | 1035 | 1052 | --         | NAC |                        |                       |             |     |
| CakTSSR01235 | CakTC22805 | (CA)6     | 776  | 787  | --         | --  | TCTAAGATTCTGATTGTGGA   | AAGGACGTTACACTACACTGC | 54.86,54.57 | 158 |
| CakTSSR01236 | CakTC22822 | (TTG)5    | 567  | 581  | --         | --  | TTCTCCAAGAGTTTAGGGTTT  | TGATAAACCTCTCACGAAATC | 54.82,54.45 | 161 |
| CakTSSR01237 | CakTC22852 | (GTG)5    | 370  | 384  | --         | --  | CCTACCTGAGATGGTCTTCT   | GGTTGTTTATGAGGATGATGA | 55.06,54.98 | 150 |
| CakTSSR01238 | CakTC22852 | (GAA)5    | 779  | 793  | --         | --  |                        |                       |             |     |
| CakTSSR01239 | CakTC22877 | (AAT)7    | 53   | 73   | --         | --  |                        |                       |             |     |
| CakTSSR01240 | CakTC22897 | (AAT)6    | 3477 | 3494 | --         | --  | AGAATGAACCGAACCTGTTAT  | CGGTCCTGCCTATACAAATA  | 55.34,55.48 | 158 |
| CakTSSR01241 | CakTC22907 | (TA)10    | 1003 | 1022 | --         | --  | GGTGCTCAACTTGATTGATTA  | AAAGATGCAATTGTGCTCTAC | 55.39,54.73 | 154 |
| CakTSSR01242 | CakTC22916 | (TC)10    | 1424 | 1443 | Flower bud | --  |                        |                       |             |     |
| CakTSSR01243 | CakTC22933 | (AATA)6   | 108  | 131  | --         | --  | ACTGTCCAAATTCTGCAATAA  | CGGGTGTTACTGTTAAGGATA | 54.99,54.5  | 150 |
| CakTSSR01244 | CakTC22934 | (CT)6     | 1305 | 1316 | --         | --  | TGGCTAATAAATCTTCACCAA  | CCTCAATAGTTTGAAGAACG  | 55.1,54.34  | 152 |
| CakTSSR01245 | CakTC22935 | (GA)6     | 1866 | 1877 | --         | --  | GAGATATGACTGCTGTAGGC   | CATTATTTCTCTCTCTGCT   | 54.22,55.32 | 143 |
| CakTSSR01246 | CakTC22937 | (GA)6     | 2432 | 2443 | --         | --  | CCTCAATAGTTTGAAGAACG   | TGGCTAATAAATCTTCACCAA | 54.34,55.1  | 152 |
| CakTSSR01247 | CakTC22939 | (CTT)5    | 1455 | 1469 | --         | --  | AGATAACCAATCCACACACAC  | AGAGTTTGAGTTTGGAGGAAC | 54.81,55.09 | 145 |
| CakTSSR01248 | CakTC22942 | (CT)20    | 89   | 128  | --         | --  |                        |                       |             |     |
| CakTSSR01249 | CakTC22958 | (GA)7     | 499  | 512  | --         | --  |                        |                       |             |     |
| CakTSSR01250 | CakTC22966 | (GGAAA)5  | 117  | 141  | --         | --  | CATTTCAAGTCGGGAATCTA   | TGCGAAGAATAAACCATTTAG | 55.31,54.88 | 151 |
| CakTSSR01251 | CakTC22971 | (CAACTG)5 | 3365 | 3394 | --         | --  |                        |                       |             |     |
| CakTSSR01252 | CakTC23014 | (TC)7     | 144  | 157  | --         | --  | CGATCAGATCTCTGAGTTCAA  | AAACAAAACACCGATCTACAA | 55.52,54.91 | 144 |
| CakTSSR01253 | CakTC23028 | (TA)7     | 1059 | 1072 | --         | --  |                        |                       |             |     |
| CakTSSR01254 | CakTC23040 | (AT)6     | 817  | 828  | --         | --  | TGAGATTCTGGGAACAAATTA  | CTGACTCGTGCTTCTCATACT | 54.89,54.77 | 159 |

|              |            |           |      |      |            |    |                        |                       |             |     |
|--------------|------------|-----------|------|------|------------|----|------------------------|-----------------------|-------------|-----|
| CakTSSR01255 | CakTC23047 | (TA)7     | 121  | 134  | --         | -- | AAAGACATTTCCAAAGTCACA  | CCCTCTTAATAATGGGCTAC  | 54.85,54.77 | 146 |
| CakTSSR01256 | CakTC23058 | (TA)6     | 53   | 64   | --         | -- |                        |                       |             |     |
| CakTSSR01257 | CakTC23070 | (TAA)5    | 2447 | 2461 | --         | HB | CTAATTCATTGCTGGTTTTG   | CTCATTGGGCATAAAACCTTG | 55.18,55.18 | 152 |
| CakTSSR01258 | CakTC23072 | (GAA)6    | 417  | 434  | --         | -- | TGAATCTGGTTGGTGTGTAAT  | GAATTTGCACAAAGAAGAAAC | 55.43,54.27 | 248 |
| CakTSSR01259 | CakTC23077 | (TCAAC)5  | 506  | 530  | --         | -- | GGGGAGTTGTTAGAGAATCAG  | CCATGGTGAATGAAGAGAGT  | 55.47,55.01 | 156 |
| CakTSSR01260 | CakTC23088 | (TTA)5    | 1548 | 1562 | --         | -- | CATGAACTCCTCCAATATGAA  | CTTAAATAATCGTCAGCTTCG | 55.16,54.64 | 147 |
| CakTSSR01261 | CakTC23090 | (TC)8     | 25   | 40   | --         | -- |                        |                       |             |     |
| CakTSSR01262 | CakTC23096 | (TGA)5    | 1780 | 1794 | --         | -- |                        |                       |             |     |
| CakTSSR01263 | CakTC23098 | (AT)6     | 147  | 158  | --         | -- | AAGGTTAATGCTTGCTACAGA  | TACCATTGCTTCTGGAAGTT  | 54.52,54.96 | 152 |
| CakTSSR01264 | CakTC23098 | (AG)8     | 1727 | 1742 | --         | -- | ATCATTTTAGGAAGAGGGCTA  | ACAACAATTTTCTCTCCCTTT | 54.87,54.65 | 153 |
| CakTSSR01265 | CakTC23100 | (CTT)13   | 337  | 375  | --         | -- | CAGCTTTCTTATCCACATCAG  | AGAAAGAAAGGGTAATTGTGG | 55.15,55.09 | 150 |
| CakTSSR01266 | CakTC23100 | (GA)6     | 1583 | 1594 | --         | -- | AGAACTATGGCGGTTTTGTAT  | CTTCTCCATAACTCCCTCATT | 55.53,54.99 | 154 |
| CakTSSR01267 | CakTC23114 | (TATT)7   | 1359 | 1386 | Young_pod  | -- | TTTTCATTTAGCTGATTGCT   | TGGTGAAATCAAATGATGAGT | 55.31,55.48 | 155 |
| CakTSSR01268 | CakTC23121 | (TA)6     | 3653 | 3664 | --         | -- |                        |                       |             |     |
| CakTSSR01269 | CakTC23122 | (TA)6     | 217  | 228  | Shoot      | -- | TTCCCATGTACTTTACCTCCT  | TAATGACAGGGATCTGTTTTT | 55.35,54.29 | 156 |
| CakTSSR01270 | CakTC23122 | (TA)6     | 5020 | 5031 | Shoot      | -- | CAGGAGCTCTGATACCATCTT  | TTAGGATCAATCCCATAATGA | 56.08,54.62 | 134 |
| CakTSSR01271 | CakTC23141 | (CA)8     | 1210 | 1225 | --         | -- | TCCTGGTGTCTTTCTTTGAATA | CAAAAGTATTTGGGCTATGA  | 54.97,54.72 | 172 |
| CakTSSR01272 | CakTC23145 | (CAT)5    | 336  | 350  | --         | -- | AGGTTCTACTCAAATGCATCA  | TGATCCTAACTTGCACTTTGT | 54.97,55.05 | 166 |
| CakTSSR01273 | CakTC23146 | (CAT)5    | 261  | 275  | --         | -- | ATCCAACACAAGCTCTACTCA  | ACTTGCACCTTGTGTAATCTC | 55.04,54.58 | 154 |
| CakTSSR01274 | CakTC23156 | (GGAT)5   | 1242 | 1261 | --         | -- | CCACTAGGAAGGATTGGTTAT  | TTCAATACTTTGAGGTTGAGA | 54.89,54.95 | 158 |
| CakTSSR01275 | CakTC23159 | (TA)16    | 1242 | 1273 | --         | -- | GTGGTCATCTTGACTCTCAAT  | CATCAACATCGCTTATGTACC | 54.1,55.71  | 147 |
| CakTSSR01276 | CakTC23161 | (ATT)6    | 1926 | 1943 | --         | -- | TAGAGATTGTTCCGACAGAGA  | GGTGAACAGAGTGTTGGAT   | 55.1,54.91  | 160 |
| CakTSSR01277 | CakTC23168 | (TA)7     | 426  | 439  | --         | -- | ATATGCCTTTTCTTTTCATCC  | GTTATAGGCAAACCAAGACAA | 55.09,54.61 | 138 |
| CakTSSR01278 | CakTC23169 | (GAT)7    | 1029 | 1049 | --         | -- |                        |                       |             |     |
| CakTSSR01279 | CakTC23175 | (CACAAA)7 | 1634 | 1675 | --         | -- |                        |                       |             |     |
| CakTSSR01280 | CakTC23222 | (AGA)9    | 1284 | 1310 | Flower bud | -- | TTCAAAGCATGATTCTGAGAC  | ATATCAATGGCCTTAATCTCC | 55.52,54.9  | 152 |
| CakTSSR01281 | CakTC23259 | (TTC)6    | 579  | 596  | Flower bud | -- |                        |                       |             |     |
| CakTSSR01282 | CakTC23281 | (CA)7     | 1621 | 1634 | --         | -- | GTAGTCGGTTACCATCCTACC  | AACATGACAATCAAGATTTGG | 55.22,55.06 | 139 |
| CakTSSR01283 | CakTC23285 | (TG)7     | 1350 | 1363 | Flower bud | -- | GAACAGAGATAGGGAACCATT  | GTAGTCGGTTACCATCCTACC | 54.82,55.22 | 156 |
| CakTSSR01284 | CakTC23296 | (AATA)5   | 784  | 803  | --         | -- |                        |                       |             |     |
| CakTSSR01285 | CakTC23297 | (TATT)5   | 647  | 666  | --         | -- | TCATTCAAATGCAGTTCTTCT  | CTGAACAAACCAATCATCTGT | 55.1,55.13  | 145 |
| CakTSSR01286 | CakTC23317 | (TTC)5    | 1795 | 1809 | --         | -- | GATAAGCCTGCTAAAGAGAGG  | GAACAGAATCGTCAATTTCAA | 55.23,55.36 | 151 |
| CakTSSR01287 | CakTC23317 | (CT)8     | 2493 | 2508 | --         | -- |                        |                       |             |     |
| CakTSSR01288 | CakTC23318 | (GAA)5    | 584  | 598  | --         | -- | GAACAGAATCGTCAATTTCAA  | GATAAGCCTGCTAAAGAGAGG | 55.36,55.23 | 151 |
| CakTSSR01289 | CakTC23319 | (GAA)5    | 596  | 610  | --         | -- | GAACAGAATCGTCAATTTCAA  | GATAAGCCTGCTAAAGAGAGG | 55.36,55.23 | 151 |
| CakTSSR01290 | CakTC23328 | (ACA)6    | 92   | 109  | --         | -- |                        |                       |             |     |
| CakTSSR01291 | CakTC23329 | (TGT)6    | 1515 | 1532 | --         | -- | TTGAAGACAAGTCTTCAGGA   | AATGAAACACTCACCCTCTG  | 55.14,55.2  | 151 |

|              |            |           |      |      |            |      |                        |                        |             |     |
|--------------|------------|-----------|------|------|------------|------|------------------------|------------------------|-------------|-----|
| CakTSSR01292 | CakTC23330 | (ACA)6    | 36   | 53   | --         | --   |                        |                        |             |     |
| CakTSSR01293 | CakTC23332 | (TA)9     | 1016 | 1033 | --         | --   | TCAAGCAAGGATTGATTATGT  | ATTAAGTCCAGAAGCTCCAAG  | 54.91,55.38 | 133 |
| CakTSSR01294 | CakTC23344 | (TTG)5    | 1300 | 1314 | --         | --   | GTTTGAATTCTCTGTCAGCA   | TCTCAATGGTTACAAGTCAGG  | 55.6,55.31  | 150 |
| CakTSSR01295 | CakTC23345 | (TTG)7    | 881  | 901  | --         | --   | TAGCATCCTTATTCTTGTGG   | CAATATCAATTTCAAGTTGG   | 54.7,54.78  | 152 |
| CakTSSR01296 | CakTC23347 | (CT)12    | 983  | 1006 | --         | --   | CTTGAAGAAATTCAGACCTT   | AGAAGCATTGTGCGAGTC     | 55.2,55.34  | 158 |
| CakTSSR01297 | CakTC23348 | (CT)9     | 896  | 913  | --         | --   | CTTGAAGAAATTCAGACCTT   | CTTCGCTTCTTCATTTCTT    | 55.2,55.66  | 142 |
| CakTSSR01298 | CakTC23350 | (GA)8     | 2378 | 2393 | --         | --   |                        |                        |             |     |
| CakTSSR01299 | CakTC23351 | (TC)11    | 1539 | 1560 | --         | --   | TCCCTAACTCCTGCATAAACT  | CGGTGTAGTGAGTGAGAGAAA  | 55.66,55.56 | 153 |
| CakTSSR01300 | CakTC23353 | (TGAT)5   | 815  | 834  | --         | --   | GTATTGGCTTCCTGTTAGGT   | AAACCTAATTTTCAACAGG    | 55.11,55.1  | 136 |
| CakTSSR01301 | CakTC23354 | (TA)6     | 1057 | 1068 | --         | --   | GGTCGCTTATATTTGTGAAA   | GCGACTTCTAAAAGAGTGACA  | 54.71,54.93 | 172 |
| CakTSSR01302 | CakTC23356 | (TGAT)5   | 1249 | 1268 | --         | --   | GTATTGGCTTCCTGTTAGGT   | AAACCTAATTTTCAACAGG    | 55.11,55.1  | 136 |
| CakTSSR01303 | CakTC23356 | (GA)10    | 1423 | 1442 | --         | --   |                        |                        |             |     |
| CakTSSR01304 | CakTC23367 | (CTT)5    | 208  | 222  | --         | NAC  | CCAATCTCTGCTTCCTTAAAT  | GATGGACCACAGTCAATAGAA  | 55.32,55.05 | 142 |
| CakTSSR01305 | CakTC23382 | (AAAAAT)8 | 536  | 575  | Root       | bHLH | TGGTGTGAACACGTACACTTA  | GCATATAATCCTAACCCACAA  | 55.08,54.35 | 154 |
| CakTSSR01306 | CakTC23382 | (TTG)7    | 1649 | 1669 | Root       | bHLH | GAGGAGGAGCACAGAAGTAT   | TCAACTGTTCAACAACATCCT  | 55.21,55.64 | 163 |
| CakTSSR01307 | CakTC23383 | (AT)6     | 160  | 171  | --         | bHLH | ATTTTCTCACCCTCTTTT     | CTTTGAAATTGGTGAAGCTA   | 54.65,54.9  | 144 |
| CakTSSR01308 | CakTC23402 | (TA)7     | 12   | 25   | --         | --   |                        |                        |             |     |
| CakTSSR01309 | CakTC23410 | (TC)7     | 1918 | 1931 | Young_pod  | --   |                        |                        |             |     |
| CakTSSR01310 | CakTC23411 | (CT)9     | 2114 | 2131 | --         | --   |                        |                        |             |     |
| CakTSSR01311 | CakTC23412 | (GA)8     | 2584 | 2599 | --         | --   |                        |                        |             |     |
| CakTSSR01312 | CakTC23413 | (GA)13    | 799  | 824  | --         | --   |                        |                        |             |     |
| CakTSSR01313 | CakTC23420 | (ATG)5    | 1174 | 1188 | --         | --   | GGGACTATGGAGATTAATTGA  | CATGGTACTGTCCTGTGATT   | 54.96,55    | 171 |
| CakTSSR01314 | CakTC23435 | (AG)7     | 2359 | 2372 | --         | --   | CATGGGAGAAACAAAGTAGA   | CACATCACAGAAGAGGAGAAC  | 54.55,54.8  | 149 |
| CakTSSR01315 | CakTC23439 | (TC)16    | 2031 | 2062 | --         | --   | GTGAACCTCAAGTGTGTCTCC  | GAAGCAGAAGGAGAGAGAATC  | 54.7,54.96  | 154 |
| CakTSSR01316 | CakTC23448 | (AC)10    | 1956 | 1975 | Flower bud | --   | TGACCCAGAAACAGATTCATA  | CTTGCTTTCCCTAATTGACT   | 55.66,55.39 | 157 |
| CakTSSR01317 | CakTC23448 | (TTAT)5   | 2384 | 2403 | Flower bud | --   |                        |                        |             |     |
| CakTSSR01318 | CakTC23450 | (TA)6     | 1198 | 1209 | --         | --   | CCTTCATCTTATGGAGGATTT  | ATTATTACCTCGTCGACCAAA  | 54.93,56.32 | 153 |
| CakTSSR01319 | CakTC23462 | (AAT)5    | 437  | 451  | --         | --   | TCCTCCGTTGCTGTGTTGAT   | CAAGTGAACCCACTAATTTT   | 54.89,55.82 | 150 |
| CakTSSR01320 | CakTC23466 | (AG)8     | 1125 | 1140 | --         | --   | CTTCAATTACGCATCCTTAG   | TACGAGTTTGTGGCATAGAT   | 54.48,55.02 | 164 |
| CakTSSR01321 | CakTC23472 | (ATG)6    | 4048 | 4065 | --         | --   | CAGAAGATGATCCTAGCAATG  | ATCATCGTAATCAACGTCATC  | 55.06,55    | 143 |
| CakTSSR01322 | CakTC23478 | (AG)15    | 2237 | 2266 | --         | --   |                        |                        |             |     |
| CakTSSR01323 | CakTC23479 | (TC)6     | 1278 | 1289 | --         | --   | TGGTTCAATTCGTCTTCATAG  | TCCTTCATGCAGATTTATGAT  | 55.4,54.82  | 137 |
| CakTSSR01324 | CakTC23480 | (GA)13    | 2684 | 2709 | --         | --   |                        |                        |             |     |
| CakTSSR01325 | CakTC23481 | (TTAAA)6  | 239  | 268  | --         | --   | AACGAATTGGAAGTACTAGTGG | TCCATAAAATACCCAATTAAGG | 55.21,55.04 | 145 |
| CakTSSR01326 | CakTC23493 | (AG)11    | 916  | 937  | --         | --   | GGTGGTGGAGAAGATATAGGA  | AAGATTTGATTAGGAGCGATG  | 55.68,56.13 | 152 |
| CakTSSR01327 | CakTC23495 | (AG)11    | 181  | 202  | --         | --   | AAGATTTGATTAGGAGCGATG  | AGATGAAGATGAAGCCATGTA  | 56.13,54.88 | 153 |
| CakTSSR01328 | CakTC23506 | (AGA)9    | 479  | 505  | --         | --   | GGTCATTGTTGAGTATTTGG   | CCTTCTTCTACCACTTGCTCT  | 54.67,55.46 | 160 |

|              |            |        |       |       |            |              |                        |                        |             |     |
|--------------|------------|--------|-------|-------|------------|--------------|------------------------|------------------------|-------------|-----|
| CakTSSR01329 | CakTC23511 | (GAA)9 | 657   | 683   | --         | --           | GTCTGATGCAGAGAAAACCTTC | AAAACCTAACCACGTTACACGA | 54.19,55.03 | 143 |
| CakTSSR01330 | CakTC23511 | (CT)7  | 839   | 852   | --         | --           | TCGTGTAACGTGGTTAGTTTT  | AGCCATCTTCAGAGAGAGAAG  | 55.03,55.5  | 149 |
| CakTSSR01331 | CakTC23514 | (TC)6  | 3191  | 3202  | --         | --           | CAACAATTACAGCCACTCAAT  | GTCATGTGATTGGAGTTCAT   | 55.34,54.86 | 144 |
| CakTSSR01332 | CakTC23516 | (AG)12 | 2078  | 2101  | --         | --           |                        |                        |             |     |
| CakTSSR01333 | CakTC23528 | (CAT)5 | 69    | 83    | --         | --           |                        |                        |             |     |
| CakTSSR01334 | CakTC23530 | (GA)7  | 1374  | 1387  | --         | --           |                        |                        |             |     |
| CakTSSR01335 | CakTC23532 | (TC)7  | 12    | 25    | --         | --           |                        |                        |             |     |
| CakTSSR01336 | CakTC23541 | (AC)6  | 3510  | 3521  | --         | Pseudo_ARR-B | TTAACTTCTGCAACAAAACC   | TTACTCTCCATGTTAATTGTGG | 54.81,54.47 | 151 |
| CakTSSR01337 | CakTC23542 | (AC)6  | 1620  | 1631  | --         | --           | TTAACTTCTGCAACAAAACC   | TTACTCTCCATGTTAATTGTGG | 54.81,54.47 | 151 |
| CakTSSR01338 | CakTC23551 | (TTC)6 | 40    | 57    | --         | --           |                        |                        |             |     |
| CakTSSR01339 | CakTC23554 | (GAT)5 | 361   | 375   | --         | AP2-EREBP    | GTTTTTGTGGACGATGATT    | AAAGACTTGGTGTGTTTGAA   | 55.04,54.94 | 150 |
| CakTSSR01340 | CakTC23555 | (TAA)5 | 409   | 423   | --         | --           | CGCAACTAGATTCGATAGAGA  | TGCTTTAGATTGCTCATTGAT  | 54.99,55.23 | 150 |
| CakTSSR01341 | CakTC23567 | (AT)8  | 583   | 598   | --         | --           | TATGGTGTTTTCTGTCCAAT   | ACCTCTGTCTCCCTTAGAAGA  | 54.67,54.77 | 160 |
| CakTSSR01342 | CakTC23586 | (AG)7  | 173   | 186   | --         | --           |                        |                        |             |     |
| CakTSSR01343 | CakTC23593 | (TTC)7 | 282   | 302   | --         | --           | AAAATGTCAAAGACCCTTTTTC | ACAGTTTGTGTTTCTCTGAG   | 55.04,54.85 | 149 |
| CakTSSR01344 | CakTC23593 | (TGA)7 | 429   | 449   | --         | --           | CTCAGAAGCAAAACAACTGT   | TGAAACAAGACAATCCATCTC  | 54.85,55.18 | 154 |
| CakTSSR01345 | CakTC23594 | (TTC)7 | 234   | 254   | --         | --           | AAAATGTCAAAGACCCTTTTTC | ACAGTTTGTGTTTCTCTGAG   | 55.04,54.85 | 149 |
| CakTSSR01346 | CakTC23594 | (TGA)7 | 381   | 401   | --         | --           | CTCAGAAGCAAAACAACTGT   | TGAAACAAGACAATCCATCTC  | 54.85,55.18 | 154 |
| CakTSSR01347 | CakTC23605 | (GA)15 | 1371  | 1400  | --         | PLATZ        |                        |                        |             |     |
| CakTSSR01348 | CakTC23606 | (CT)15 | 77    | 106   | --         | --           |                        |                        |             |     |
| CakTSSR01349 | CakTC23613 | (GA)12 | 816   | 839   | --         | --           | TGATATGCAGAAGGGAGAATA  | CCAATTCTAGGGTTTTCATTT  | 55,55.03    | 159 |
| CakTSSR01350 | CakTC23613 | (GA)7  | 1012  | 1025  | --         | --           | AAATGAAAACCTAGAATTGG   | CATCCCATATTCTTTTACCT   | 55.03,54.83 | 159 |
| CakTSSR01351 | CakTC23613 | (AG)7  | 1129  | 1142  | --         | --           | TATTGGAGTGAGAAGGTGAAA  | TCATCATCAACAACAACCATA  | 54.95,54.79 | 163 |
| CakTSSR01352 | CakTC23616 | (CT)9  | 1068  | 1085  | --         | --           | ACGAAAATACAGAGGGATAGG  | TGATATGCAGAAGGGAGAATA  | 55.04,55    | 149 |
| CakTSSR01353 | CakTC23628 | (AT)10 | 518   | 537   | Flower bud | --           |                        |                        |             |     |
| CakTSSR01354 | CakTC23633 | (ATT)6 | 172   | 189   | --         | --           | CCTACCTAACCCACAATTCTC  | AATACCCAAAATACCCCTTCAC | 55.35,54.75 | 149 |
| CakTSSR01355 | CakTC23636 | (ATC)5 | 1530  | 1544  | --         | --           | CCAACCACCATCTTCATAGTA  | CGAAGGATTGGTTTATTATTG  | 55.11,54.13 | 156 |
| CakTSSR01356 | CakTC23645 | (AG)7  | 11243 | 11256 | --         | --           | TCCTTTTCAACTTCATTAGG   | ATCAATCTTTCAATCCCTTC   | 53.86,54.89 | 150 |
| CakTSSR01357 | CakTC23648 | (GA)6  | 10702 | 10713 | --         | --           | CTGCAGTAACACAGTTGATGA  | CGGATTATAGTTTGGGAAAT   | 54.85,55    | 150 |
| CakTSSR01358 | CakTC23652 | (TA)7  | 408   | 421   | --         | --           | ACCTTTAGGTGTCTTTGTCA   | CATTCCCACTGTAAGTTGITT  | 54.04,54.34 | 136 |
| CakTSSR01359 | CakTC23673 | (AG)8  | 1091  | 1106  | --         | --           |                        |                        |             |     |
| CakTSSR01360 | CakTC23678 | (AC)6  | 52    | 63    | --         | --           |                        |                        |             |     |
| CakTSSR01361 | CakTC23680 | (TA)6  | 190   | 201   | --         | AP2-EREBP    | CCTCCACCATTAATTTTCATT  | TTCTAGCTTCCACCAAAAATA  | 55.67,54.45 | 152 |
| CakTSSR01362 | CakTC23680 | (TTC)6 | 1398  | 1415  | --         | AP2-EREBP    | GCAGCTATTCAATTCATCTTCT | AAAACTCTATTGCTGACCA    | 53.88,54.32 | 158 |
| CakTSSR01363 | CakTC23681 | (AT)6  | 1     | 12    | --         | AP2-EREBP    |                        |                        |             |     |
| CakTSSR01364 | CakTC23685 | (TC)7  | 82    | 95    | --         | --           |                        |                        |             |     |
| CakTSSR01365 | CakTC23688 | (ATG)5 | 946   | 960   | --         | --           |                        |                        |             |     |

|              |            |            |      |      |    |     |                        |                        |             |     |
|--------------|------------|------------|------|------|----|-----|------------------------|------------------------|-------------|-----|
| CakTSSR01366 | CakTC23696 | (AG)7      | 1811 | 1824 | -- | --  |                        |                        |             |     |
| CakTSSR01367 | CakTC23700 | (GAGAGT)12 | 1073 | 1144 | -- | --  |                        |                        |             |     |
| CakTSSR01368 | CakTC23703 | (CTCTCA)12 | 103  | 174  | -- | --  | CTCTCACTCTCACCTCACT    | CGTGGAAGGTATGTATCAAAA  | 54.29,55.29 | 174 |
| CakTSSR01369 | CakTC23704 | (GA)6      | 914  | 925  | -- | --  |                        |                        |             |     |
| CakTSSR01370 | CakTC23705 | (AG)22     | 1966 | 2009 | -- | --  | GAGCTCTCTCTTGAATCTGA   | TTCTGTTACACCACCGTTTAT  | 53.97,54.79 | 149 |
| CakTSSR01371 | CakTC23706 | (CT)6      | 106  | 117  | -- | --  | TCGTTTAAACGGTTACTGTTTT | CAGAGAGCTCAGAATCCAATA  | 54.33,54.77 | 158 |
| CakTSSR01372 | CakTC23707 | (AG)18     | 1420 | 1455 | -- | --  | GAATCCAATAGATCGCAGAG   | ACCGTTTATTATTCCGTTTTC  | 54.95,55.07 | 147 |
| CakTSSR01373 | CakTC23713 | (AT)7      | 1499 | 1512 | -- | --  | CACCGGTTTTCATAATACTTG  | TCTTCTGCTGTTTTTCAAAG   | 54.9,55.08  | 147 |
| CakTSSR01374 | CakTC23721 | (AGT)5     | 1117 | 1131 | -- | --  |                        |                        |             |     |
| CakTSSR01375 | CakTC23723 | (AGT)5     | 1969 | 1983 | -- | --  |                        |                        |             |     |
| CakTSSR01376 | CakTC23725 | (ATT)5     | 1392 | 1406 | -- | --  |                        |                        |             |     |
| CakTSSR01377 | CakTC23727 | (AG)8      | 2681 | 2696 | -- | --  | CGCAGAGATCCATAACATAAG  | ATATTAAACCCCTTCCATACCA | 55.12,55.1  | 153 |
| CakTSSR01378 | CakTC23728 | (CT)7      | 1    | 14   | -- | --  |                        |                        |             |     |
| CakTSSR01379 | CakTC23735 | (AG)6      | 1625 | 1636 | -- | --  |                        |                        |             |     |
| CakTSSR01380 | CakTC23736 | (GA)12     | 1372 | 1395 | -- | --  |                        |                        |             |     |
| CakTSSR01381 | CakTC23748 | (CA)9      | 39   | 56   | -- | --  |                        |                        |             |     |
| CakTSSR01382 | CakTC23760 | (CT)8      | 4    | 19   | -- | --  |                        |                        |             |     |
| CakTSSR01383 | CakTC23773 | (CAA)5     | 297  | 311  | -- | C3H | CAACAACACCTTCTTCAACTC  | TCAGACATAGTAGCCCAAGAA  | 54.92,55.15 | 157 |
| CakTSSR01384 | CakTC23774 | (AG)6      | 282  | 293  | -- | C3H | TGTGAGTGAATGAAAGAAACA  | TTTTGTTGTGAGATGAGTGTG  | 54.26,54.63 | 150 |
| CakTSSR01385 | CakTC23774 | (CAA)5     | 691  | 705  | -- | C3H | CAACAACACCTTCTTCAACTC  | TCAGACATAGTAGCCCAAGAA  | 54.92,55.15 | 157 |
| CakTSSR01386 | CakTC23775 | (GTT)5     | 1769 | 1783 | -- | C3H | TCAGACATAGTAGCCCAAGAA  | CAACAACACCTTCTTCAACTC  | 55.15,54.92 | 157 |
| CakTSSR01387 | CakTC23775 | (TC)6      | 2182 | 2193 | -- | C3H | TTTTGTTGTGAGATGAGTGTG  | TGTGAGTGAATGAAAGAAACA  | 54.63,54.26 | 151 |
| CakTSSR01388 | CakTC23785 | (GAT)5     | 523  | 537  | -- | --  | GATTCATCATTCCCAAAAAC   | ATCCAAACGATATTGGTCTC   | 55.63,55.67 | 153 |
| CakTSSR01389 | CakTC23786 | (ATC)5     | 563  | 577  | -- | --  | ATCCAAACGATATTGGTCTC   | GATTCATCATTCCCAAAAAC   | 55.67,55.63 | 153 |
| CakTSSR01390 | CakTC23787 | (ATC)6     | 364  | 381  | -- | --  | TCACATTGTCATACTTTGGAT  | ATGAAGATACAGAGGCCAAGT  | 55.68,55.49 | 150 |
| CakTSSR01391 | CakTC23790 | (ATA)7     | 237  | 257  | -- | --  | CATAAGATGAACTCCACAACC  | ACTTTGATGAACAACCTTGAA  | 54.64,54.85 | 164 |
| CakTSSR01392 | CakTC23798 | (GA)6      | 1930 | 1941 | -- | --  | CGGTTTACAATGCTACTGAC   | GTGGCTTGACGTATCTGATT   | 55.11,55.23 | 150 |
| CakTSSR01393 | CakTC23799 | (GA)6      | 1837 | 1848 | -- | --  | CGGTTTACAATGCTACTGAC   | ATCCCTCCTCTTGAAGAACTC  | 55.11,56.51 | 148 |
| CakTSSR01394 | CakTC23803 | (TGA)15    | 3735 | 3779 | -- | --  | GTTGGATTGAAGATTTCGAG   | TGCAACAACACTATTGAAGAA  | 54.84,54.51 | 158 |
| CakTSSR01395 | CakTC23812 | (AT)7      | 2124 | 2137 | -- | --  |                        |                        |             |     |
| CakTSSR01396 | CakTC23815 | (AAT)5     | 81   | 95   | -- | --  |                        |                        |             |     |
| CakTSSR01397 | CakTC23817 | (GAT)5     | 1861 | 1875 | -- | --  |                        |                        |             |     |
| CakTSSR01398 | CakTC23819 | (TCA)5     | 1310 | 1324 | -- | --  | TACTTAAGACTGCCGCTACAT  | GACCATCCAGTTCTTCACC    | 54.55,55.25 | 151 |
| CakTSSR01399 | CakTC23833 | (TCA)5     | 89   | 103  | -- | --  |                        |                        |             |     |
| CakTSSR01400 | CakTC23833 | (AG)9      | 256  | 273  | -- | --  | TATTCATACAAGCCAAAGGAA  | GAACTCCTAAAAGTGCTGTCA  | 55.1,54.76  | 152 |
| CakTSSR01401 | CakTC23835 | (TC)9      | 455  | 472  | -- | --  |                        |                        |             |     |
| CakTSSR01402 | CakTC23839 | (TGA)5     | 1230 | 1244 | -- | --  | GTGGAGTTGTCTGTTGTTGAT  | AAATAGCCTCATCTCCATTTC  | 55.02,55.08 | 140 |

|              |            |         |      |      |            |           |                        |                         |             |     |
|--------------|------------|---------|------|------|------------|-----------|------------------------|-------------------------|-------------|-----|
| CakTSSR01403 | CakTC23843 | (TCT)5  | 1427 | 1441 | --         | DBP       | TCGTGAATATTGCTTCCTTTA  | TTTCAACCAGTTTTCGTTAGA   | 55.25,55.21 | 149 |
| CakTSSR01404 | CakTC23845 | (AT)8   | 1366 | 1381 | Flower bud | --        | ATTAACAAACGACGGATTCT   | TCTTTTATTGGAGTTGCTTG    | 55.5,54.9   | 154 |
| CakTSSR01405 | CakTC23845 | (GAA)5  | 1615 | 1629 | Flower bud | --        | GAGAAGGAGATGAACGAAGAT  | TCTCTCTCAATTGATCGCTAC   | 55.09,54.75 | 156 |
| CakTSSR01406 | CakTC23846 | (CTT)5  | 327  | 341  | --         | --        | TCTCTCTCAATTGATCGCTAC  | GAGAAGGAGATGAACGAAGAT   | 54.75,55.09 | 154 |
| CakTSSR01407 | CakTC23847 | (TCC)6  | 698  | 715  | --         | --        | TCGTTTGTGATCCCTTATATC  | AGTCACAAATCTGAGGTGAAA   | 54.28,54.83 | 150 |
| CakTSSR01408 | CakTC23866 | (TC)8   | 316  | 331  | --         | --        | AAGAGAGAAGGTTTCGCTTAAA | AGAGTGGTTGGTTAGGTTGAT   | 55.27,55.25 | 150 |
| CakTSSR01409 | CakTC23866 | (TTA)5  | 1711 | 1725 | --         | --        | CAGTCAAGACAATCTGTGTCA  | GTAGGAAGGAGGTTGGTAGTG   | 54.6,55.42  | 158 |
| CakTSSR01410 | CakTC23872 | (TG)12  | 2358 | 2381 | --         | --        |                        |                         |             |     |
| CakTSSR01411 | CakTC23885 | (AAG)6  | 399  | 416  | --         | --        | GTCTGTCAAATGTTTCCTACG  | CCCCTTTACAAACGTTAAGAC   | 54.89,55.58 | 148 |
| CakTSSR01412 | CakTC23905 | (TA)8   | 2572 | 2587 | --         | --        | ATACACAACCATATGCCTCTT  | TTGTTGCATCTACTCTTATGAAA | 53.81,54.55 | 150 |
| CakTSSR01413 | CakTC23914 | (AT)10  | 245  | 264  | --         | --        | TTCAGAGTGCATACAACAAGA  | CCAATTGATTCTTCGAGTTTA   | 54.48,54.66 | 142 |
| CakTSSR01414 | CakTC23915 | (GA)11  | 3149 | 3170 | --         | --        | ATGAGAGAATTGTATGTGGTG  | TCTTCAACCCAGATCTCACTA   | 55.05,54.92 | 162 |
| CakTSSR01415 | CakTC23916 | (ACC)5  | 93   | 107  | --         | --        |                        |                         |             |     |
| CakTSSR01416 | CakTC23917 | (AT)6   | 924  | 935  | --         | --        | CATGGTGGTCATAAACTTCTT  | ATACGAGCTCCAATTCACATA   | 54.25,54.94 | 156 |
| CakTSSR01417 | CakTC23960 | (AT)9   | 14   | 31   | --         | --        |                        |                         |             |     |
| CakTSSR01418 | CakTC23960 | (TAC)5  | 1647 | 1661 | --         | --        | GGCTTCGTAGAATAATGATGA  | GTGGGTTGAAGGTATTGAAA    | 54.6,55.05  | 145 |
| CakTSSR01419 | CakTC23965 | (CTG)6  | 395  | 412  | --         | --        | TCAGTATCAGTCCACCAACTC  | TTAGCAAAATCACCACCTAGA   | 55.11,55.16 | 159 |
| CakTSSR01420 | CakTC23970 | (AT)7   | 561  | 574  | --         | --        | TTGCCACAGCATTATTAGTCT  | GACCATTCTTATCATCTGACC   | 55.18,55.24 | 142 |
| CakTSSR01421 | CakTC23971 | (AAT)8  | 4242 | 4265 | --         | --        | AATCTATTTC AATGGCCTCTC | AAAATTCGGTATGATACGAT    | 55.08,55.24 | 152 |
| CakTSSR01422 | CakTC23979 | (AAT)5  | 3336 | 3350 | --         | --        |                        |                         |             |     |
| CakTSSR01423 | CakTC23984 | (CAA)8  | 138  | 161  | --         | --        | TCTTCTCTCTTCTCGAATCAA  | TTTAGAAGGTGGATGATGATG   | 54.43,55.16 | 150 |
| CakTSSR01424 | CakTC24026 | (AG)6   | 2511 | 2522 | --         | --        |                        |                         |             |     |
| CakTSSR01425 | CakTC24027 | (CT)6   | 62   | 73   | Shoot      | --        |                        |                         |             |     |
| CakTSSR01426 | CakTC24028 | (CT)6   | 27   | 38   | --         | --        |                        |                         |             |     |
| CakTSSR01427 | CakTC24033 | (AAG)5  | 127  | 141  | --         | --        | TAGAATTGGAGACACCAAG    | GAATCTAAATCCCATCGTTTT   | 55.31,54.94 | 156 |
| CakTSSR01428 | CakTC24037 | (ATA)8  | 1867 | 1890 | --         | --        |                        |                         |             |     |
| CakTSSR01429 | CakTC24039 | (ACC)5  | 791  | 805  | --         | --        | ATCAAAGTTCCTTTTGGTGT   | TGCCTTCAGATAAATGGAATA   | 55.38,55.02 | 140 |
| CakTSSR01430 | CakTC24062 | (TCT)5  | 599  | 613  | --         | --        | CACGAAGACTGCTCTGATAAC  | ATGAGATGGCGAAGGTATTAT   | 55.2,55.38  | 163 |
| CakTSSR01431 | CakTC24064 | (TC)14  | 3    | 30   | --         | AP2-EREBP |                        |                         |             |     |
| CakTSSR01432 | CakTC24070 | (GA)6   | 1184 | 1195 | --         | --        |                        |                         |             |     |
| CakTSSR01433 | CakTC24071 | (TC)6   | 20   | 31   | --         | --        |                        |                         |             |     |
| CakTSSR01434 | CakTC24122 | (AGA)5  | 71   | 85   | Root       | --        |                        |                         |             |     |
| CakTSSR01435 | CakTC24134 | (GT)8   | 2679 | 2694 | --         | --        | ACCCTTTCTGTCAATTAAACC  | GGTGTGATTAGGCAAGTAAA    | 54.92,54.61 | 150 |
| CakTSSR01436 | CakTC24143 | (TCTT)8 | 81   | 112  | Shoot      | --        |                        |                         |             |     |
| CakTSSR01437 | CakTC24149 | (AG)11  | 44   | 65   | --         | --        |                        |                         |             |     |
| CakTSSR01438 | CakTC24159 | (CT)6   | 170  | 181  | Shoot      | --        | TTCAGTATTCCAACGGTTTA   | CGAATCGAGATCAAGTAAAAA   | 55.02,54.82 | 157 |
| CakTSSR01439 | CakTC24160 | (GA)9   | 1    | 18   | --         | --        |                        |                         |             |     |

|              |            |         |      |      |             |    |                       |                        |             |     |
|--------------|------------|---------|------|------|-------------|----|-----------------------|------------------------|-------------|-----|
| CakTSSR01440 | CakTC24176 | (GAA)6  | 693  | 710  | --          | -- | AGGTTCCTCTTCGGTTTAAAG | CTATTTTCATCTCCACCTCACA | 54.6,55.23  | 152 |
| CakTSSR01441 | CakTC24183 | (CT)6   | 132  | 143  | --          | -- | TCTAAAGATGTTCTGCTGAA  | GGATAAAAAGCGGATACTGAT  | 55.28,55.12 | 158 |
| CakTSSR01442 | CakTC24186 | (TC)7   | 1119 | 1132 | --          | -- | TGTTTTCGTTTTCTTCGTATC | ATTAGGGTTTGAAATGAAAGG  | 54.73,55.03 | 170 |
| CakTSSR01443 | CakTC24190 | (TC)6   | 25   | 36   | --          | -- |                       |                        |             |     |
| CakTSSR01444 | CakTC24234 | (TTG)5  | 73   | 87   | Mature Leaf | -- |                       |                        |             |     |
| CakTSSR01445 | CakTC24242 | (CAT)6  | 330  | 347  | --          | -- | TAATGGAGCAGAGCAATTTTA | TGAGCTTGAAACATTCCTTA   | 55.41,55.29 | 159 |
| CakTSSR01446 | CakTC24244 | (GGA)5  | 1409 | 1423 | --          | -- | GGCTGTCTCCTAGTTAGGT   | CCACCCTTAGATATGAAACC   | 54.44,55.28 | 171 |
| CakTSSR01447 | CakTC24254 | (CT)7   | 62   | 75   | --          | -- |                       |                        |             |     |
| CakTSSR01448 | CakTC24261 | (CT)7   | 3    | 16   | --          | -- |                       |                        |             |     |
| CakTSSR01449 | CakTC24261 | (TGA)5  | 602  | 616  | --          | -- | AATCTGTTGACGACATTTTAC | AGTCAAAATCATCCATTATGC  | 55.12,54.26 | 153 |
| CakTSSR01450 | CakTC24261 | (AAT)6  | 1427 | 1444 | --          | -- | GCAAGTGCGTAACCTATTATT | ACACAGTTGAAAGGTCAAAGA  | 54.79,54.92 | 147 |
| CakTSSR01451 | CakTC24262 | (TGA)5  | 625  | 639  | --          | -- | AATCTGTTGACGACATTTTAC | AGTCAAAATCATCCATTATGC  | 55.12,54.26 | 153 |
| CakTSSR01452 | CakTC24270 | (GAA)6  | 126  | 143  | --          | -- | CACAATGAAAGAAACCGTAAT | TCAGATTCCAGCAATAAAAC   | 54.45,54.65 | 152 |
| CakTSSR01453 | CakTC24285 | (ACA)6  | 19   | 36   | --          | -- |                       |                        |             |     |
| CakTSSR01454 | CakTC24299 | (TTA)5  | 1308 | 1322 | --          | -- | TTTTTGATCTTCAGAAACCTG | GCTTGTACCGTTAAAAAGTCA  | 54.68,54.85 | 156 |
| CakTSSR01455 | CakTC24299 | (AGA)5  | 1475 | 1489 | --          | -- | TGACTTTTTAACGGTACAAGC | ATCCTCTCAAAAACACACAAA  | 54.85,54.85 | 153 |
| CakTSSR01456 | CakTC24309 | (TCT)6  | 244  | 261  | --          | -- | CAATTTACCTACTGGCTACGA | GATGATGACGATGATGAAGAT  | 54.81,54.85 | 150 |
| CakTSSR01457 | CakTC24316 | (TC)7   | 126  | 139  | --          | -- | TTCTTTCTCTACACGTCTCCA | AAAATGGAAAGAGTGAAAGATG | 55.18,55.22 | 150 |
| CakTSSR01458 | CakTC24318 | (TGG)5  | 1458 | 1472 | Root        | -- | GGGTTTGTGATTTCACATTAG | CATTGTCTCAAAACAAAGGAC  | 54.67,54.85 | 174 |
| CakTSSR01459 | CakTC24330 | (TAT)7  | 202  | 222  | --          | -- | CACAAACACAAACACAAACAC | TGCAGAATTAGGTTAAAGCA   | 54.94,55.48 | 152 |
| CakTSSR01460 | CakTC24337 | (GAA)5  | 1722 | 1736 | --          | -- | AGAACGAGATGTCACAAGAAA | TCTGTTTGAAATACCCTTGAA  | 55,54.97    | 151 |
| CakTSSR01461 | CakTC24343 | (GAA)8  | 3097 | 3120 | --          | -- | AGAGATGAAATTGAGCCTTTT | CCCATCTTTTCTTCTTCAAT   | 54.88,55.13 | 175 |
| CakTSSR01462 | CakTC24344 | (GA)10  | 277  | 296  | --          | -- | ACACTCCAATGGAATTCATAA | AATATCAGAATGGAGCCCTAC  | 54.58,54.95 | 158 |
| CakTSSR01463 | CakTC24346 | (TC)6   | 6    | 17   | --          | -- |                       |                        |             |     |
| CakTSSR01464 | CakTC24351 | (TC)15  | 93   | 122  | Young_pod   | -- |                       |                        |             |     |
| CakTSSR01465 | CakTC24358 | (CA)8   | 53   | 68   | --          | -- |                       |                        |             |     |
| CakTSSR01466 | CakTC24360 | (TC)9   | 807  | 824  | --          | -- | TGTCTGGTCAATTTTCCTATG | TGATAATCATCAGCAATTTCC  | 55.24,55.24 | 144 |
| CakTSSR01467 | CakTC24366 | (AG)7   | 255  | 268  | --          | -- | TTCTGGAGAAAATACATGCAC | CAGGTTTCTGTCAGGTACAAG  | 55.39,54.97 | 158 |
| CakTSSR01468 | CakTC24367 | (AGA)9  | 1316 | 1342 | --          | -- | ACGAGAGCGTATGTTAGTGAG | AAAGTTGGGAGAAAGAGAAG   | 54.83,54.54 | 145 |
| CakTSSR01469 | CakTC24380 | (TCT)5  | 1833 | 1847 | Flower bud  | -- |                       |                        |             |     |
| CakTSSR01470 | CakTC24395 | (GTG)5  | 428  | 442  | --          | -- | AGAGGAAGGGCTTTTGATAC  | AAACTCAATTCAGATGCCATA  | 55.13,54.91 | 152 |
| CakTSSR01471 | CakTC24408 | (TC)7   | 93   | 106  | --          | -- |                       |                        |             |     |
| CakTSSR01472 | CakTC24415 | (AG)6   | 2051 | 2062 | --          | -- |                       |                        |             |     |
| CakTSSR01473 | CakTC24420 | (TAA)10 | 251  | 280  | --          | -- | ATTAGGATTTCGCTTGCTATT | CCTTGTGAGTTTGTGACTAGG  | 55.06,54.97 | 151 |
| CakTSSR01474 | CakTC24436 | (ATT)5  | 1277 | 1291 | --          | -- | TAITATTCTCAACCGTCCAA  | ATCCGTCTCTCCTAATGAAAC  | 54.94,55    | 208 |
| CakTSSR01475 | CakTC24439 | (AT)9   | 2967 | 2984 | --          | -- |                       |                        |             |     |
| CakTSSR01476 | CakTC24450 | (CT)6   | 60   | 71   | --          | -- |                       |                        |             |     |

|              |            |           |      |      |            |             |                        |                        |             |     |
|--------------|------------|-----------|------|------|------------|-------------|------------------------|------------------------|-------------|-----|
| CakTSSR01477 | CakTC24460 | (ATCATT)6 | 22   | 57   | --         | --          |                        |                        |             |     |
| CakTSSR01478 | CakTC24470 | (TTC)22   | 1120 | 1185 | --         | --          |                        |                        |             |     |
| CakTSSR01479 | CakTC24491 | (TCT)5    | 39   | 53   | --         | --          |                        |                        |             |     |
| CakTSSR01480 | CakTC24491 | (CTT)5    | 558  | 572  | --         | --          | GTTTTGGTAGTTCCCTTGAG   | TTTCGTCAGAGACAGAAGAAG  | 55.55,54.88 | 141 |
| CakTSSR01481 | CakTC24492 | (TTTCAA)6 | 134  | 169  | --         | --          | TTGAACACCCAAAAGTTACAC  | TTCAATTGTTCTCTGTATGC   | 55.23,55.39 | 160 |
| CakTSSR01482 | CakTC24495 | (TGT)6    | 1898 | 1915 | --         | --          | GAATGGTTCGATTAAGGTTT   | CATTTAATCCTTTTGGTGACA  | 55.02,55.25 | 147 |
| CakTSSR01483 | CakTC24509 | (CT)11    | 96   | 117  | --         | --          |                        |                        |             |     |
| CakTSSR01484 | CakTC24510 | (CT)11    | 97   | 118  | --         | --          |                        |                        |             |     |
| CakTSSR01485 | CakTC24535 | (AT)6     | 98   | 109  | --         | --          |                        |                        |             |     |
| CakTSSR01486 | CakTC24535 | (TGGA)8   | 862  | 893  | --         | --          | TACAGCCCCTACTATTGAATG  | AGAACAACCCACCTCAGTCTA  | 54.57,53.99 | 149 |
| CakTSSR01487 | CakTC24542 | (TGG)5    | 1374 | 1388 | --         | --          | GCCATCCCTTTGTAGATTACT  | AGGAGAATAATTGTGGTGGAG  | 55.03,55.75 | 147 |
| CakTSSR01488 | CakTC24545 | (AG)9     | 2849 | 2866 | --         | --          | CGAAAGAGAAAGAGAGTGTGA  | GTAATGAAATTCGGGTACG    | 54.88,56.3  | 152 |
| CakTSSR01489 | CakTC24549 | (AT)6     | 799  | 810  | --         | --          | CTTATTAACTCGAGGGTTGC   | GGGTCCACTCTCAACATTAGT  | 55.81,55.66 | 151 |
| CakTSSR01490 | CakTC24566 | (AT)6     | 3234 | 3245 | --         | --          |                        |                        |             |     |
| CakTSSR01491 | CakTC24572 | (AAAAC)5  | 364  | 388  | --         | HB          | CGTTGCTTAAGATACAAAAC   | AGAGCTTCCAAGTCTCTCAT   | 54.4,54.92  | 179 |
| CakTSSR01492 | CakTC24575 | (TGG)5    | 387  | 401  | --         | --          | AGACGGATGCTTCATATTCTT  | TGTAGAGGAGCAGATATTGA   | 55.58,55.06 | 154 |
| CakTSSR01493 | CakTC24577 | (TGG)5    | 368  | 382  | Root       | --          | AGACGGATGCTTCATATTCTT  | TGTAGAGGAGCAGATATTGA   | 55.58,55.06 | 154 |
| CakTSSR01494 | CakTC24583 | (AG)6     | 763  | 774  | --         | NAC         | GAGATCTCTCCTTCCTCAAAC  | CCATCTCAACAACAGATAAGG  | 54.63,54.82 | 158 |
| CakTSSR01495 | CakTC24583 | (AG)9     | 942  | 959  | --         | NAC         |                        |                        |             |     |
| CakTSSR01496 | CakTC24586 | (AAG)6    | 1495 | 1512 | --         | --          |                        |                        |             |     |
| CakTSSR01497 | CakTC24608 | (AGC)5    | 1655 | 1669 | --         | --          | TTAAAAGGGTAGCAGGAAAAT  | ATGCTTTCTAAAGGGAACAAT  | 54.96,54.78 | 151 |
| CakTSSR01498 | CakTC24614 | (TTTGA)5  | 2829 | 2853 | --         | --          | GGATCAAAGAGAGGGAGTTT   | TTCATACATCCAATAACCAA   | 54.91,55.46 | 146 |
| CakTSSR01499 | CakTC24616 | (ACA)6    | 229  | 246  | --         | --          | CTACCTTCACAACACATCCAT  | CATGCAACTTAGGTTGAAGAC  | 55,55.05    | 140 |
| CakTSSR01500 | CakTC24617 | (ATG)6    | 855  | 872  | Flower bud | --          | GATTTTGCTGATGAAAAGATG  | GATGTTGCTGCAATGAGTTAT  | 55.03,55.42 | 150 |
| CakTSSR01501 | CakTC24636 | (CAA)40   | 1    | 120  | --         | --          |                        |                        |             |     |
| CakTSSR01502 | CakTC24639 | (TA)7     | 2595 | 2608 | --         | --          |                        |                        |             |     |
| CakTSSR01503 | CakTC24676 | (TA)8     | 679  | 694  | --         | Bromodomain | GCTTCTCCCTAAAAATTCATA  | TCTAAAGAGTCTCCCTCAGAAA | 55.25,55.1  | 141 |
| CakTSSR01504 | CakTC24676 | (CCA)6    | 1407 | 1424 | --         | Bromodomain | AATCACTTCTCTGAAGAACTCC | TCCTGTTGAGATTGAGAAAGA  | 55.01,55.06 | 149 |
| CakTSSR01505 | CakTC24677 | (TA)8     | 650  | 665  | --         | --          | GCTTCTCCCTAAAAATTCATA  | TCTAAAGAGTCTCCCTCAGAAA | 55.25,55.1  | 141 |
| CakTSSR01506 | CakTC24680 | (AT)7     | 539  | 552  | Young_pod  | --          | GTCCCCAAATCCAATATTATC  | ACTGTTTGCTTTTCACTTCA   | 54.98,55.26 | 156 |
| CakTSSR01507 | CakTC24688 | (CAC)5    | 354  | 368  | --         | --          | ACACTTTCCATCTCTCTCTC   | TGAAGTAGTTGGGTCTTTTIG  | 54.99,54.64 | 151 |
| CakTSSR01508 | CakTC24689 | (CAT)6    | 102  | 119  | --         | --          | AACATTTTTCCTTTCCTTCC   | TCCATTGATTACAGGAGATTG  | 54.96,55.16 | 145 |
| CakTSSR01509 | CakTC24689 | (TTA)5    | 3334 | 3348 | --         | --          | GACTAGCATTTGTCCTGATTG  | AAGGAAAGTAGGAAAGCATTG  | 54.97,55.39 | 160 |
| CakTSSR01510 | CakTC24692 | (AGA)8    | 2358 | 2381 | --         | HB          |                        |                        |             |     |
| CakTSSR01511 | CakTC24704 | (AT)8     | 646  | 661  | --         | --          | CCTTACACTCTGGTTGCAATA  | ATTGAATAAATGGCCACAAA   | 55.52,55.59 | 158 |
| CakTSSR01512 | CakTC24713 | (CA)6     | 98   | 109  | Shoot      | --          |                        |                        |             |     |
| CakTSSR01513 | CakTC24719 | (AG)8     | 1062 | 1077 | --         | bZIP        | ATCTATTGGGTTTGGTTGAAT  | TCATTTATAGAAGCAGCACCT  | 55.12,54.43 | 148 |

|              |            |         |      |      |            |         |                        |                        |             |     |
|--------------|------------|---------|------|------|------------|---------|------------------------|------------------------|-------------|-----|
| CakTSSR01514 | CakTC24736 | (TTG)6  | 1157 | 1174 | --         | --      | TTTCATTATCCAAGAGTTGA   | CAAAGACAATTCAAGCAAGTT  | 54.89,54.79 | 147 |
| CakTSSR01515 | CakTC24745 | (GAC)5  | 3467 | 3481 | --         | --      | ATCTCCTGTTGAGATTGATGA  | CCCAATTTCACATCATGTACT  | 54.65,54.93 | 153 |
| CakTSSR01516 | CakTC24767 | (TTA)5  | 52   | 66   | --         | --      |                        |                        |             |     |
| CakTSSR01517 | CakTC24768 | (CTT)6  | 1055 | 1072 | --         | --      | CAITCCCATTGAAATACAGAG  | TGGGTAAAGTGAAGTGAGAAG  | 54.76,54.61 | 143 |
| CakTSSR01518 | CakTC24768 | (CCA)7  | 1234 | 1254 | --         | --      | CATCCCTCTTTTCATTCTCTT  | TTTTTCAACGAGTTCTGAGAG  | 55.12,54.9  | 151 |
| CakTSSR01519 | CakTC24772 | (TGA)5  | 1515 | 1529 | --         | --      | TGATGATGATGAGAGTGATGA  | GTCATTTTCATCGAGATCGT   | 54.78,55.1  | 157 |
| CakTSSR01520 | CakTC24775 | (TA)9   | 1004 | 1021 | Shoot      | --      | CTCAATTCTAAAACCCAGCAT  | CGTACCTCATGAATAACCAAA  | 56.05,55.29 | 150 |
| CakTSSR01521 | CakTC24775 | (CTC)5  | 7743 | 7757 | Shoot      | --      | CCAATAAGCATTGAATATGG   | GAATAGGCGAACTCTTCTGAT  | 54.92,55.3  | 145 |
| CakTSSR01522 | CakTC24781 | (AG)7   | 2767 | 2780 | --         | --      | CCGTTACGAAGATCCTTACTT  | GAAAAACCAAAACCAATCAAC  | 55.27,56.17 | 172 |
| CakTSSR01523 | CakTC24785 | (TA)6   | 318  | 329  | --         | --      | CCGAATTGTAATATTTATACCG | CCAGATAGTAATTTCTCAATCA | 54.9,53.11  | 296 |
| CakTSSR01524 | CakTC24788 | (TAA)5  | 76   | 90   | --         | --      |                        |                        |             |     |
| CakTSSR01525 | CakTC24792 | (CT)7   | 62   | 75   | --         | --      |                        |                        |             |     |
| CakTSSR01526 | CakTC24804 | (AG)12  | 119  | 142  | --         | --      | TAGITCATTCAAAGCCTCTCA  | GATGCCATGTTACAACAACCTT | 55.28,55.17 | 148 |
| CakTSSR01527 | CakTC24815 | (TAT)6  | 1018 | 1035 | --         | AUX/IAA | AGGTCGAGGCTAGTATAGGAA  | TCATTTCTTGTCCTAATGAA   | 54.96,54.89 | 153 |
| CakTSSR01528 | CakTC24819 | (TA)8   | 432  | 447  | Flower bud | --      | GAAGAAGGGGAAAGAGACATA  | CTGTCCTACACTGCATTACC   | 55.12,54.99 | 142 |
| CakTSSR01529 | CakTC24824 | (TA)8   | 3424 | 3439 | --         | MYB     | GGCTTCAGCTGTTACAATTAC  | TAAATAAGAGGGTGCATTGGA  | 54.35,55.1  | 149 |
| CakTSSR01530 | CakTC24834 | (TC)6   | 219  | 230  | --         | --      | TCATTCCAATCCAACCTGAATA | GTGAGTTGAGAAGGGAAGAGT  | 55.58,55.07 | 146 |
| CakTSSR01531 | CakTC24835 | (TAG)5  | 1037 | 1051 | Flower bud | --      | TAAATAGTGGACCAAAATTGC  | ACTCCTGGCTATTGTTTACC   | 54.56,55.11 | 161 |
| CakTSSR01532 | CakTC24837 | (CCA)5  | 245  | 259  | --         | --      | CCTTCTTACACTAGTGCTCCA  | TCTAGACATTGGAGGAGGTG   | 54.81,55.2  | 165 |
| CakTSSR01533 | CakTC24838 | (TAT)6  | 119  | 136  | --         | --      | GAAAAGGAAAAACACACATTCA | TTGTGTTTCTGTTTGTGTGA   | 55.28,55.18 | 140 |
| CakTSSR01534 | CakTC24850 | (TC)13  | 188  | 213  | --         | --      | CCACGCTTTCTTTCTTTATTT  | TGAAGATTGGAAGGAGCATAA  | 55.54,55.21 | 151 |
| CakTSSR01535 | CakTC24855 | (AAC)5  | 685  | 699  | --         | --      | TTGAATTAAACACTCTCTTTGC | TAATCTTACAGGAAGGCAACA  | 54.1,55.16  | 138 |
| CakTSSR01536 | CakTC24858 | (TTC)5  | 1702 | 1716 | --         | TUB     | ATGTGATTGAGATGAAGAGA   | TCAGCTGTGATAGTGTGAAAA  | 54.82,54.48 | 164 |
| CakTSSR01537 | CakTC24858 | (ATA)5  | 3614 | 3628 | --         | TUB     |                        |                        |             |     |
| CakTSSR01538 | CakTC24863 | (AG)7   | 108  | 121  | --         | --      | GAATTAAGAGAGTGGCTCACA  | AAAAGAAGGGTGAGTGGAAT   | 54.7,54.53  | 155 |
| CakTSSR01539 | CakTC24870 | (TC)7   | 1329 | 1342 | --         | --      | CAATAGGTTGGATCTTCAATG  | GGAAGATGAATGTGTGTGAC   | 54.76,55.38 | 153 |
| CakTSSR01540 | CakTC24875 | (TC)13  | 1    | 26   | --         | --      |                        |                        |             |     |
| CakTSSR01541 | CakTC24885 | (TAA)5  | 239  | 253  | --         | --      | AAAGTACAGTACCCGACACAA  | CTTTTCAACTTGTTTGGAAAG  | 54.94,54.39 | 161 |
| CakTSSR01542 | CakTC24891 | (AAT)11 | 122  | 154  | --         | --      | CCTTGCTCTTCTTCACTTCT   | AGCTAAAAGGTGAATTCGTT   | 55.58,55.01 | 165 |
| CakTSSR01543 | CakTC24908 | (GAA)6  | 1431 | 1448 | --         | --      |                        |                        |             |     |
| CakTSSR01544 | CakTC24910 | (TCA)8  | 122  | 145  | --         | --      | ACCACTAAGCAATGTCTTCT   | ATTGATCTTTAGCTGGGTAGG  | 55.57,55.2  | 153 |
| CakTSSR01545 | CakTC24928 | (TA)6   | 1110 | 1121 | --         | --      | CAAATAATCGGATTGAGACAG  | CAGGGCCAGTATACTAATGAA  | 54.92,54.57 | 150 |
| CakTSSR01546 | CakTC24929 | (CAC)5  | 264  | 278  | --         | --      | CAAAATCAAACTTCTCCAC    | GCTCCAAAATCTAACACATTG  | 54.85,54.99 | 154 |
| CakTSSR01547 | CakTC24934 | (TA)10  | 236  | 255  | --         | --      | TCTCTTATCACAAGGATGCAC  | GTTTCAAAATTGAACACCGTA  | 55.38,55.32 | 151 |
| CakTSSR01548 | CakTC24937 | (AG)11  | 2358 | 2379 | --         | --      |                        |                        |             |     |
| CakTSSR01549 | CakTC24942 | (CTT)5  | 388  | 402  | --         | TRAF    | CTCTGGAAATTTAAACAAGCA  | CATCCAAGACAAAATTCCTTA  | 54.9,54.5   | 158 |
| CakTSSR01550 | CakTC24960 | (AG)13  | 858  | 883  | --         | --      |                        |                        |             |     |

|              |            |            |      |      |            |      |                        |                         |             |     |
|--------------|------------|------------|------|------|------------|------|------------------------|-------------------------|-------------|-----|
| CakTSSR01551 | CakTC24961 | (AC)9      | 123  | 140  | --         | --   | CTTGTTCTCTCTTTCCAATCA  | TTTTGTTCTGTTCAACAAGGT   | 54.65,54.94 | 136 |
| CakTSSR01552 | CakTC24968 | (AG)9      | 783  | 800  | --         | --   | GAACCTTGAATTCTGTTTCTTC | TCTCAACAATCCTTCTTTCAA   | 54.78,55.08 | 151 |
| CakTSSR01553 | CakTC24977 | (ATTTC A)7 | 209  | 250  | Flower bud | --   | TGAAACTGAAGCAGACAAT    | CCATTATCCATCATCACAAT    | 55.18,54.79 | 148 |
| CakTSSR01554 | CakTC24985 | (ATG)5     | 997  | 1011 | Flower bud | --   | TATGTCAATCGAAACAACCTT  | CATTGTTTCTTCCTCCTCTT    | 54.83,55.2  | 148 |
| CakTSSR01555 | CakTC25007 | (CAA)5     | 906  | 920  | --         | --   | AACCTCAGAGTGCTTCTCATT  | TTGCTAGAATAGGCAATAACG   | 55.7,55.06  | 151 |
| CakTSSR01556 | CakTC25017 | (AT)6      | 1102 | 1113 | --         | --   | GCCACGAAATTACTAGATTGA  | CGTCCCAAAATATAAGCAAA    | 54.68,55.51 | 169 |
| CakTSSR01557 | CakTC25022 | (TTC)6     | 218  | 235  | --         | --   | AATGCTTTGTACTTCAACTCG  | TGTTTGAAGAGAAGAGAATG    | 54.82,54.65 | 149 |
| CakTSSR01558 | CakTC25026 | (ATA)6     | 2550 | 2567 | --         | --   |                        |                         |             |     |
| CakTSSR01559 | CakTC25027 | (TGA)5     | 936  | 950  | --         | C2H2 | TTAGGGTTTGTGAGAATTGA   | CAACAACAAAACCAAAGTTTC   | 54.97,54.96 | 140 |
| CakTSSR01560 | CakTC25027 | (AAG)5     | 2085 | 2099 | --         | C2H2 | TTTAAGCTTGCTCTTCACAGT  | TGTTCTCTCTTCATTAAAG     | 54.7,53.86  | 157 |
| CakTSSR01561 | CakTC25036 | (AGT)5     | 729  | 743  | --         | WRKY | GTGGTGCAACGATAGTAACTC  | CTGTGAAAAATAACCCCTTTC   | 54.91,55.48 | 149 |
| CakTSSR01562 | CakTC25037 | (AGT)5     | 730  | 744  | --         | WRKY | GTGGTGCAACGATAGTAACTC  | CAAAAAGCTGTGAAAAATAGC   | 54.91,54.67 | 156 |
| CakTSSR01563 | CakTC25042 | (AG)14     | 1    | 28   | --         | --   |                        |                         |             |     |
| CakTSSR01564 | CakTC25043 | (TTAT)5    | 1975 | 1994 | --         | --   |                        |                         |             |     |
| CakTSSR01565 | CakTC25044 | (TA)6      | 453  | 464  | --         | --   | AAAGAGAATGGCTTGATTACA  | GCATTGTGGTTTCAACTTTA    | 54.24,55.48 | 155 |
| CakTSSR01566 | CakTC25052 | (TC)8      | 15   | 30   | --         | LUG  |                        |                         |             |     |
| CakTSSR01567 | CakTC25057 | (GAT)5     | 1190 | 1204 | --         | --   | AGTCGAAGATGATGAAGATGA  | CATTCCCTCTCAAGGTAGATT   | 54.82,54.99 | 153 |
| CakTSSR01568 | CakTC25059 | (TCTCTA)5  | 25   | 54   | --         | --   |                        |                         |             |     |
| CakTSSR01569 | CakTC25063 | (CT)7      | 44   | 57   | --         | --   |                        |                         |             |     |
| CakTSSR01570 | CakTC25081 | (TC)7      | 6    | 19   | --         | --   |                        |                         |             |     |
| CakTSSR01571 | CakTC25085 | (TC)9      | 237  | 254  | Young_pod  | --   | CGAGATCCTCTCTTCTTCTTC  | ATATCGTGTGAAGGTGTGAC    | 54.97,54.99 | 150 |
| CakTSSR01572 | CakTC25085 | (CT)7      | 371  | 384  | Young_pod  | --   | AGTCACACCTTCAACACGATA  | TCGATAAAGGAACATGAAGA    | 55.68,55.05 | 163 |
| CakTSSR01573 | CakTC25092 | (CTT)5     | 16   | 30   | --         | --   |                        |                         |             |     |
| CakTSSR01574 | CakTC25098 | (TCT)5     | 2058 | 2072 | --         | FHA  | ATCACTTCAAACCCCTTTTCTC | GCATGTGAAAGTGAAAGCTAC   | 55.03,55.21 | 150 |
| CakTSSR01575 | CakTC25099 | (AG)10     | 2304 | 2323 | --         | --   |                        |                         |             |     |
| CakTSSR01576 | CakTC25109 | (CT)9      | 318  | 335  | --         | --   | TCTCCCATTTCTTCTTCTCTC  | AAAAATGGGTCAGATCTCAAT   | 55.23,55.23 | 147 |
| CakTSSR01577 | CakTC25127 | (ATT)7     | 216  | 236  | --         | --   | GGAAAGAAACAACAAGAGGAT  | TTTCCAGAAACAACCTCACAT   | 55.03,54.85 | 170 |
| CakTSSR01578 | CakTC25136 | (ATT)5     | 1010 | 1024 | --         | --   | CAGTGCATTCCTTATTCAATC  | GTTGATTCAATTTACCGACAA   | 54.91,55.24 | 155 |
| CakTSSR01579 | CakTC25141 | (TCA)5     | 362  | 376  | --         | --   | TCTCCATATTCTTACGTCCA   | GAAACCTAGCTATGGAAGGAG   | 54.92,54.92 | 153 |
| CakTSSR01580 | CakTC25144 | (TTC)5     | 82   | 96   | --         | --   |                        |                         |             |     |
| CakTSSR01581 | CakTC25147 | (AG)9      | 300  | 317  | --         | --   |                        |                         |             |     |
| CakTSSR01582 | CakTC25161 | (TC)7      | 9    | 22   | --         | --   |                        |                         |             |     |
| CakTSSR01583 | CakTC25167 | (AT)7      | 12   | 25   | --         | --   |                        |                         |             |     |
| CakTSSR01584 | CakTC25189 | (TA)10     | 121  | 140  | --         | MYB  | ATTCATAGTAGGCGTCACCTT  | TCTAATTCCATGAAGCAGAG    | 55.53,54.79 | 138 |
| CakTSSR01585 | CakTC25190 | (TC)6      | 497  | 508  | --         | --   | CTATTGCATGCACTCTCTTTT  | GTCTTCAAAATCTTTATTGGT   | 54.9,54.25  | 159 |
| CakTSSR01586 | CakTC25190 | (GA)13     | 1326 | 1351 | --         | --   | TGTCCACGTTATTTTGTAT    | CAAAAATTAGATAGGGTTTGTCA | 54.73,55.29 | 155 |
| CakTSSR01587 | CakTC25192 | (GA)11     | 1654 | 1675 | --         | --   |                        |                         |             |     |

|              |            |          |      |      |             |       |                        |                         |             |     |
|--------------|------------|----------|------|------|-------------|-------|------------------------|-------------------------|-------------|-----|
| CakTSSR01588 | CakTC25199 | (CTT)6   | 3827 | 3844 | --          | CCAAT | TCTTTATCTTCTGCAAAACCA  | CAAGAGCAAGAACAAGAAGAG   | 55.29,54.64 | 149 |
| CakTSSR01589 | CakTC25208 | (AT)6    | 453  | 464  | Mature Leaf | --    | GGTTGAGTGAACATCAGGATA  | AATTACGTATTGCAAGGTCAA   | 55.05,55.04 | 161 |
| CakTSSR01590 | CakTC25214 | (AAT)5   | 3074 | 3088 | --          | --    | TTGAAGGGCACAATTAGATA   | GATAAGATTTGGTGCTTTCCT   | 55.1,55.15  | 214 |
| CakTSSR01591 | CakTC25218 | (AT)6    | 480  | 491  | --          | --    | TTGTTCTGTTTTGGTTGAGT   | AGCCAAGATGTTGTCATTAAA   | 54.94,54.99 | 136 |
| CakTSSR01592 | CakTC25225 | (TCTTC)5 | 1382 | 1406 | Young_pod   | --    | CCCATCTTCTGATTCTACCT   | TCTAGGACGAAGAAGATGTGA   | 54.99,55.1  | 154 |
| CakTSSR01593 | CakTC25225 | (GA)7    | 2334 | 2347 | Young_pod   | --    | CTCTCTTCTCTTTGGTTTGT   | AAGTTGCATGCATCAGTAAAT   | 55.27,55.01 | 152 |
| CakTSSR01594 | CakTC25228 | (TA)20   | 6    | 45   | --          | --    |                        |                         |             |     |
| CakTSSR01595 | CakTC25235 | (AAT)11  | 315  | 347  | Root        | bZIP  | GGTCTTCATCATCAACTTCA   | ATCTAGCTTGGCTTTGAGAAG   | 55.18,55.69 | 141 |
| CakTSSR01596 | CakTC25236 | (AAT)11  | 295  | 327  | --          | bZIP  | GGTCTTCATCATCAACTTCA   | ATCTAGCTTGGCTTTGAGAAG   | 55.18,55.69 | 141 |
| CakTSSR01597 | CakTC25250 | (TAT)6   | 1409 | 1426 | --          | --    |                        |                         |             |     |
| CakTSSR01598 | CakTC25251 | (GAA)6   | 2725 | 2742 | --          | --    | AGTCTTGTTTTAGGGCAATTT  | TCGTCGAAGACATTGTTTCTTT  | 54.86,55.02 | 166 |
| CakTSSR01599 | CakTC25253 | (GAA)6   | 2817 | 2834 | Flower bud  | --    | AGTCTTGTTTTAGGGCAATTT  | TCGTCGAAGACATTGTTTCTTT  | 54.86,55.02 | 166 |
| CakTSSR01600 | CakTC25276 | (AT)6    | 134  | 145  | --          | --    | CCAAATATGACCTGCAAATTA  | TCGAAGAACTATAATCAACACAA | 55.37,54.4  | 158 |
| CakTSSR01601 | CakTC25280 | (GGT)7   | 883  | 903  | --          | --    | GGAGAAAGTGATTGGAGAATG  | TCCTTCTCACGTTTCTCTACA   | 56.3,55.18  | 161 |
| CakTSSR01602 | CakTC25290 | (AG)11   | 230  | 251  | --          | --    |                        |                         |             |     |
| CakTSSR01603 | CakTC25296 | (TA)6    | 878  | 889  | --          | --    | TCATCAACTTCCATTTTGTTT  | AATGAAGACATTGCCAAAAG    | 55.19,55.38 | 159 |
| CakTSSR01604 | CakTC25314 | (CT)6    | 144  | 155  | Root        | --    | AGCTGTGTCCGGTTATGAATC  | GTCAGTTTGGTGTGTGCTTT    | 55.23,55.1  | 134 |
| CakTSSR01605 | CakTC25329 | (TC)7    | 741  | 754  | --          | TCP   | TCACCCCTCATTTATCATCATC | GAAACTTACATGCTTGTGCTT   | 54.89,54.81 | 142 |
| CakTSSR01606 | CakTC25330 | (CT)6    | 209  | 220  | --          | --    | ACCAACAAGGAACAATCTCT   | GTTTGAAGGGTGATGATATG    | 55.38,54.58 | 149 |
| CakTSSR01607 | CakTC25330 | (TC)7    | 363  | 376  | --          | --    |                        |                         |             |     |
| CakTSSR01608 | CakTC25331 | (GAA)11  | 2379 | 2411 | --          | EIL   | CAAGTGAATGAATTCTCAAGC  | CTCTCTTCTCTCATCTTCC     | 55.1,54.81  | 152 |
| CakTSSR01609 | CakTC25334 | (CCA)5   | 1851 | 1865 | --          | --    | ACTCCTTCAACTTCAACACA   | ATAGCACTGCACTGTCTCTTC   | 54.92,54.76 | 148 |
| CakTSSR01610 | CakTC25336 | (GCT)6   | 1647 | 1664 | --          | --    |                        |                         |             |     |
| CakTSSR01611 | CakTC25339 | (ACA)5   | 112  | 126  | --          | --    | CTTCTTCACAAGCCTCAGATA  | CCATTGTTCTCTCATATTCA    | 54.85,55.16 | 154 |
| CakTSSR01612 | CakTC25339 | (AAC)5   | 2162 | 2176 | --          | --    | TTGCTCTCTTCTGCTTTATG   | TTTGTCCTTTCTCCTAAGAC    | 55.04,55.2  | 150 |
| CakTSSR01613 | CakTC25343 | (CT)9    | 10   | 27   | --          | --    |                        |                         |             |     |
| CakTSSR01614 | CakTC25344 | (AT)11   | 669  | 690  | Young_pod   | --    | GGCATCACATTCTACTATCA   | GAGTTAGACCAAAACCAAAAT   | 55.18,54.92 | 156 |
| CakTSSR01615 | CakTC25345 | (AG)7    | 3193 | 3206 | --          | --    |                        |                         |             |     |
| CakTSSR01616 | CakTC25356 | (AG)10   | 3597 | 3616 | --          | --    |                        |                         |             |     |
| CakTSSR01617 | CakTC25381 | (AG)7    | 898  | 911  | --          | --    | AAAGGGAAAGTTGAGAAAGG   | TGCTTCATTCTCTAGAAACA    | 55.18,55.28 | 155 |
| CakTSSR01618 | CakTC25384 | (AG)6    | 2365 | 2376 | --          | --    | AGGAAGACTGTGTTTGAGTGA  | TGTTGTTCCTTTTCAACTTC    | 54.89,54.59 | 150 |
| CakTSSR01619 | CakTC25385 | (AG)6    | 2349 | 2360 | --          | --    | AGGAAGACTGTGTTTGAGTGA  | TGTTGTTCCTTTTCAACTTC    | 54.89,54.59 | 150 |
| CakTSSR01620 | CakTC25391 | (AT)7    | 1923 | 1936 | --          | --    | GGTCACTGATGCAGTTTAAAG  | TTATGGAAGAAGCCAAAATAG   | 55.05,54.01 | 157 |
| CakTSSR01621 | CakTC25414 | (TCT)9   | 20   | 46   | --          | --    |                        |                         |             |     |
| CakTSSR01622 | CakTC25438 | (CA)6    | 102  | 113  | --          | --    | ACAACAACATCGAAAACAGAG  | CCATGCTTAGCGTTTTATT     | 55.38,54.89 | 153 |
| CakTSSR01623 | CakTC25440 | (CTT)6   | 2020 | 2037 | --          | --    |                        |                         |             |     |
| CakTSSR01624 | CakTC25442 | (AGC)6   | 791  | 808  | --          | --    | AAACTTTTCATGCAACAACAC  | GATGAGTTTTCTGATGATGGA   | 55.38,55.09 | 192 |

|              |            |         |      |      |            |      |                       |                       |             |     |
|--------------|------------|---------|------|------|------------|------|-----------------------|-----------------------|-------------|-----|
| CakTSSR01625 | CakTC25449 | (TTG)5  | 299  | 313  | --         | ARF  | TTCACAAAGACAAAAAGGTGT | GCAATCTTTTCCCATTTGTA  | 54.94,55.89 | 148 |
| CakTSSR01626 | CakTC25450 | (AG)12  | 1775 | 1798 | --         | --   | GGGGTTACAAAGTTAAGGAAA | AGCACCATTCAATTCAATTAC | 55.1,54.35  | 146 |
| CakTSSR01627 | CakTC25451 | (AT)6   | 2547 | 2558 | --         | --   | TGAAAATGATTCTCATCAAGC | CTGGCAATTGACTACTACGAC | 54.56,55.09 | 137 |
| CakTSSR01628 | CakTC25451 | (ATTA)6 | 3364 | 3387 | --         | --   | GATTAATCTCATAGCCGGAAC | CATTATCAGGTGTGGCATTAT | 55.5,55.07  | 143 |
| CakTSSR01629 | CakTC25458 | (TTG)7  | 325  | 345  | --         | --   | TTGTGGGACAATCATACTTT  | TTTTATGTGCAGAATCAACCT | 54.67,54.99 | 150 |
| CakTSSR01630 | CakTC25462 | (AG)9   | 1020 | 1037 | --         | --   |                       |                       |             |     |
| CakTSSR01631 | CakTC25464 | (GAA)5  | 294  | 308  | --         | --   | TATCATACATCGAAAGCTGGT | GATGAACCCTTACTCTTTCGT | 54.94,55.06 | 176 |
| CakTSSR01632 | CakTC25465 | (GAA)5  | 565  | 579  | --         | --   | TATCATACATCGAAAGCTGGT | GATGAACCCTTACTCTTTCGT | 54.94,55.06 | 176 |
| CakTSSR01633 | CakTC25470 | (CTT)6  | 1269 | 1286 | --         | --   | ATACGGATCCCCATCTTATAG | CCCACACAAACATAAACTCAA | 54.79,56.1  | 141 |
| CakTSSR01634 | CakTC25472 | (CTT)6  | 1139 | 1156 | --         | --   | ATACGGATCCCCATCTTATAG | CCCACACAAACATAAACTCAA | 54.79,56.1  | 141 |
| CakTSSR01635 | CakTC25474 | (GA)6   | 2552 | 2563 | --         | --   | TTGATGAAGAACAAGACCCTA | TAATTTCCATTTCAGTGGTTC | 54.95,54.33 | 146 |
| CakTSSR01636 | CakTC25475 | (TTA)5  | 264  | 278  | --         | --   | CATTTTCTTCGTTTGACTCTG | CAAACCAGACATTCCATAATC | 55.19,54.58 | 136 |
| CakTSSR01637 | CakTC25481 | (AAG)5  | 59   | 73   | --         | --   |                       |                       |             |     |
| CakTSSR01638 | CakTC25493 | (TC)8   | 221  | 236  | --         | --   | TTACTCTGTAGGCCATGTCAC | TTCTTCTTCTTCAGCTACG   | 55.34,55.01 | 150 |
| CakTSSR01639 | CakTC25495 | (TC)8   | 214  | 229  | --         | SET  | TTACTCTGTAGGCCATGTCAC | GTTCTTCTTCTTCAGCTACG  | 55.34,56.01 | 150 |
| CakTSSR01640 | CakTC25498 | (ACC)5  | 331  | 345  | --         | --   | GACATCTCATTCCGATACAAC | AGCTACTTAGGGAGGAATTGA | 54.53,54.92 | 122 |
| CakTSSR01641 | CakTC25509 | (AAT)5  | 1491 | 1505 | --         | --   |                       |                       |             |     |
| CakTSSR01642 | CakTC25515 | (GAT)5  | 1394 | 1408 | --         | --   |                       |                       |             |     |
| CakTSSR01643 | CakTC25516 | (GAA)5  | 1232 | 1246 | --         | --   | ATCTTCTTTGGCACATTAG   | GGTTTTAGGGTTTGAAGACAT | 56.05,54.92 | 145 |
| CakTSSR01644 | CakTC25519 | (AAAT)6 | 1471 | 1494 | --         | --   | TGTTGTGAGGGGAATAGAGTA | CCATTGGCTTCTGAAGTAGTA | 54.82,54.75 | 162 |
| CakTSSR01645 | CakTC25520 | (GGT)7  | 1324 | 1344 | --         | --   | TAGAGTTATGATTCCGGGTA  | TCTTACTCTGTTCCCTCTTCC | 54.09,55.18 | 162 |
| CakTSSR01646 | CakTC25526 | (AG)10  | 1435 | 1454 | --         | --   |                       |                       |             |     |
| CakTSSR01647 | CakTC25528 | (TAA)8  | 66   | 89   | --         | ARF  |                       |                       |             |     |
| CakTSSR01648 | CakTC25531 | (AG)6   | 1195 | 1206 | --         | --   | ACACTTGCTTCTGCATCTAAA | CTCACCCCTTTTCATTTTATC | 55.38,55.4  | 151 |
| CakTSSR01649 | CakTC25531 | (TA)6   | 1662 | 1673 | --         | --   | ACCAAAACCCATTATTCAGAT | CTCCAAGGGAGTGATACTTTC | 55.12,55.47 | 154 |
| CakTSSR01650 | CakTC25531 | (GA)12  | 1976 | 1999 | --         | --   |                       |                       |             |     |
| CakTSSR01651 | CakTC25538 | (TA)6   | 165  | 176  | Flower bud | --   | CCCCTTTCTTGTACTTTTGT  | AAGAGGACCAATATGGAGTGT | 55.17,55.17 | 153 |
| CakTSSR01652 | CakTC25542 | (ATTC)5 | 278  | 297  | --         | --   | AAAATCATCTTTTGGACACCT | ACCCATTCTTCTCTCTCTA   | 55.31,54.71 | 150 |
| CakTSSR01653 | CakTC25543 | (TTA)8  | 612  | 635  | --         | HB   | AAAATGTCACTTCTGTGAA   | AAATGGATTGAAGGAATCAGT | 55.18,55.23 | 153 |
| CakTSSR01654 | CakTC25543 | (AT)8   | 1320 | 1335 | --         | HB   | TCGAACCATTTGTAAAAACAC | TCATCCATTATTCAGCTTAT  | 55.32,54.82 | 135 |
| CakTSSR01655 | CakTC25551 | (GT)6   | 114  | 125  | --         | --   | AAAAACCACTCCATTACCT   | AAAGAGAATAGGGGACGTATG | 55.26,55.04 | 159 |
| CakTSSR01656 | CakTC25554 | (CT)14  | 79   | 106  | --         | --   |                       |                       |             |     |
| CakTSSR01657 | CakTC25577 | (AG)15  | 1403 | 1432 | Young_pod  | --   |                       |                       |             |     |
| CakTSSR01658 | CakTC25580 | (CA)6   | 2260 | 2271 | --         | --   | ATTGATTCTTATGCTGGTCAA | CTATTTTGCGACAGTGAAGTT | 54.91,54.82 | 151 |
| CakTSSR01659 | CakTC25584 | (TC)13  | 1180 | 1205 | --         | TRAF | TTTCTCCACAATTCTCGTTA  | TACAAAAGAATCAACCCAAG  | 55.13,54.59 | 165 |
| CakTSSR01660 | CakTC25584 | (AG)6   | 1427 | 1438 | --         | TRAF | TTGTTAATCAAGTTGGTTGCT | CCATCCCATACCAATAACATA | 55.07,54.86 | 132 |
| CakTSSR01661 | CakTC25585 | (TC)13  | 1994 | 2019 | --         | TRAF |                       |                       |             |     |

|              |            |         |      |      |            |              |                        |                        |             |     |
|--------------|------------|---------|------|------|------------|--------------|------------------------|------------------------|-------------|-----|
| CakTSSR01662 | CakTC25586 | (CT)10  | 513  | 532  | --         | --           |                        |                        |             |     |
| CakTSSR01663 | CakTC25591 | (TC)8   | 2250 | 2265 | --         | --           | GTACTTTCACCTTGTCTACCA  | CCATCTCAATGTAAAAGTTGC  | 55.55,54.99 | 148 |
| CakTSSR01664 | CakTC25598 | (TGT)6  | 1897 | 1914 | --         | --           | TAGCTAATCCCCCTTAATCGTT | TCTCCTTCAGAGTTCAAATCA  | 54.92,55.06 | 143 |
| CakTSSR01665 | CakTC25598 | (TAA)7  | 3787 | 3807 | --         | --           | TGAAGTTTGTACGGAATGAT   | ATTCTTGACTTGCCATCACTA  | 54.83,54.97 | 147 |
| CakTSSR01666 | CakTC25598 | (CAG)5  | 4941 | 4955 | --         | --           | CAACACATTGCTACATTGCT   | GTGGACGGTACAACACTAAGA  | 54.8,55.25  | 142 |
| CakTSSR01667 | CakTC25598 | (GCT)5  | 5369 | 5383 | --         | --           | CCATCTTCTACATCCAATTCA  | TGGAAAAGGGTAAGGATTATT  | 55.16,54.59 | 150 |
| CakTSSR01668 | CakTC25598 | (GCA)6  | 5794 | 5811 | --         | --           | TGTCATAAAAAATCCACCATC  | GACTGTGAGCAGTAGATGGAC  | 55.06,54.83 | 155 |
| CakTSSR01669 | CakTC25604 | (AG)10  | 2902 | 2921 | --         | --           |                        |                        |             |     |
| CakTSSR01670 | CakTC25613 | (GTG)5  | 3917 | 3931 | --         | --           | GATGGTAAATTGGATTGGAAG  | AAGATTAAAGCTCATTCGTGA  | 56.07,54.4  | 152 |
| CakTSSR01671 | CakTC25613 | (GTG)8  | 4091 | 4114 | --         | --           |                        |                        |             |     |
| CakTSSR01672 | CakTC25620 | (TGC)7  | 584  | 604  | Flower bud | TCP          | GAGACAGAGAATTGGACTGAA  | GGTGAAAATCAGAATCATCAG  | 54.43,54.68 | 157 |
| CakTSSR01673 | CakTC25620 | (TGT)5  | 917  | 931  | Flower bud | TCP          | AGTGAATGAAGCTGTTTGAGA  | GTCAAGGTGTGATATTCGTGT  | 55.17,54.99 | 151 |
| CakTSSR01674 | CakTC25620 | (TG)13  | 2291 | 2316 | Flower bud | TCP          |                        |                        |             |     |
| CakTSSR01675 | CakTC25621 | (AC)13  | 304  | 329  | --         | TCP          | CTCACTCTTCTCTCTCACCA   | TAGCTTTCCCTGTCTTCTTT   | 54.68,55.12 | 155 |
| CakTSSR01676 | CakTC25621 | (CAA)5  | 1365 | 1379 | --         | TCP          | GTCAAGGTGTGATATTCGTGT  | AGTGAATGAAGCTGTTTGAGA  | 54.99,55.17 | 151 |
| CakTSSR01677 | CakTC25621 | (GCA)7  | 1694 | 1714 | --         | TCP          | GGTGAAAATCAGAATCATCAG  | GAGACAGAGAATTGGACTGAA  | 54.68,54.43 | 157 |
| CakTSSR01678 | CakTC25629 | (AGAA)5 | 1    | 20   | --         | --           |                        |                        |             |     |
| CakTSSR01679 | CakTC25634 | (CAG)5  | 2705 | 2719 | --         | --           | CTACAACAACAGCAACAACAA  | GAACATAGGTTTGACCCATTC  | 54.96,55.99 | 199 |
| CakTSSR01680 | CakTC25654 | (AG)12  | 78   | 101  | --         | --           |                        |                        |             |     |
| CakTSSR01681 | CakTC25655 | (TTTC)5 | 492  | 511  | --         | --           | CCTCCTTTTAGCAATTTGAAC  | ATTGGAGGTGATGGTCTTTAT  | 55.78,55.11 | 156 |
| CakTSSR01682 | CakTC25656 | (CT)9   | 64   | 81   | --         | --           |                        |                        |             |     |
| CakTSSR01683 | CakTC25657 | (AG)7   | 869  | 882  | --         | --           |                        |                        |             |     |
| CakTSSR01684 | CakTC25669 | (TA)7   | 264  | 277  | --         | --           | ACAAACCACCACTAACACTTG  | TTCGAGCTTAAGATCCTTTTT  | 55.17,55.21 | 150 |
| CakTSSR01685 | CakTC25669 | (GCA)5  | 2009 | 2023 | --         | --           | TAATATGGGAGCAAAAACAGA  | TTCTTTGGTTCAATTATCTCG  | 55.1,54.66  | 158 |
| CakTSSR01686 | CakTC25676 | (TC)6   | 7    | 18   | --         | --           |                        |                        |             |     |
| CakTSSR01687 | CakTC25676 | (TA)9   | 1738 | 1755 | --         | --           | ATGTTTGTGTGCTTCTGCTAT  | TACAACTAACCGGCTTAATGA  | 55.08,55.21 | 157 |
| CakTSSR01688 | CakTC25678 | (TC)6   | 80   | 91   | --         | --           |                        |                        |             |     |
| CakTSSR01689 | CakTC25679 | (GT)6   | 822  | 833  | --         | --           |                        |                        |             |     |
| CakTSSR01690 | CakTC25694 | (AG)6   | 31   | 42   | --         | --           |                        |                        |             |     |
| CakTSSR01691 | CakTC25694 | (ATT)6  | 237  | 254  | --         | --           | TGAATTTGAGGTTGTGAAATC  | AACCCTTCTACAAATCCAAC   | 55.19,54.92 | 148 |
| CakTSSR01692 | CakTC25695 | (AAT)6  | 5747 | 5764 | --         | --           | AACCCTTCTACAAATCCAAC   | TGAATTTGAGGTTGTGAAATC  | 54.92,55.19 | 148 |
| CakTSSR01693 | CakTC25695 | (TC)6   | 5956 | 5967 | --         | --           |                        |                        |             |     |
| CakTSSR01694 | CakTC25699 | (CT)16  | 799  | 830  | --         | Pseudo_ARR-B | TTTCTGCTTCACTTGATCTTC  | AGGTTGGTTGTCTTAAAGTTGA | 54.8,54.04  | 149 |
| CakTSSR01695 | CakTC25708 | (GAT)5  | 4024 | 4038 | --         | --           | AAAGAGAAACGAACTCAAACC  | TTCCAGTAGAAACGAAATTCA  | 55.26,55.13 | 157 |
| CakTSSR01696 | CakTC25709 | (TGA)5  | 522  | 536  | --         | --           | AATGACCATCTTCTGTTTCT   | AAAACAGAAATCACCCAAAAGT | 55.3,55.38  | 140 |
| CakTSSR01697 | CakTC25721 | (TCA)7  | 1571 | 1591 | --         | --           | GGATCACCATTCTGAGTAACA  | TGCTTGATGAAGAGATAGAGC  | 55.05,54.92 | 151 |
| CakTSSR01698 | CakTC25722 | (AT)8   | 4624 | 4639 | --         | --           |                        |                        |             |     |

|              |            |          |      |      |            |              |                         |                       |             |     |
|--------------|------------|----------|------|------|------------|--------------|-------------------------|-----------------------|-------------|-----|
| CakTSSR01699 | CakTC25727 | (TG)7    | 868  | 881  | --         | --           | AAAGGGAGACATTAACCA      | ACACCAATTCTAATCGCTTA  | 55.48,54.31 | 147 |
| CakTSSR01700 | CakTC25732 | (ATTTT)5 | 244  | 268  | --         | --           | CTTGCAATACACTATGTCTCTGT | TGGTTCTGAAATAAACTTGC  | 54.55,54.73 | 230 |
| CakTSSR01701 | CakTC25742 | (CA)6    | 220  | 231  | Shoot      | --           | TCCCTACAGGTTTCATGACTTA  | CTCTTTGCTATGGAATGATGA | 54.82,55.48 | 150 |
| CakTSSR01702 | CakTC25757 | (ATC)5   | 191  | 205  | Shoot      | --           | TCACAATTCACAAACCAATAC   | GGTTGTGAGATAAGACAACGA | 55.08,55.3  | 136 |
| CakTSSR01703 | CakTC25764 | (GA)10   | 128  | 147  | --         | --           | CCACCTATATTTGTGAGTGGA   | CGTTTTACATTCAATCACTT  | 55.11,55.31 | 145 |
| CakTSSR01704 | CakTC25772 | (TC)13   | 36   | 61   | --         | HB           |                         |                       |             |     |
| CakTSSR01705 | CakTC25809 | (CCA)6   | 18   | 35   | --         | --           |                         |                       |             |     |
| CakTSSR01706 | CakTC25813 | (AAG)5   | 1820 | 1834 | --         | --           | GAGACGGAGAAGCATTACATA   | GCAGCAGATCTCATTATCAT  | 54.65,54.55 | 149 |
| CakTSSR01707 | CakTC25815 | (GA)6    | 2431 | 2442 | --         | --           |                         |                       |             |     |
| CakTSSR01708 | CakTC25818 | (GCT)5   | 782  | 796  | --         | --           | TGAAAGATTCTTGGAAAGTCAA  | ATCATGACCAAGAACAAG    | 55.08,54.38 | 161 |
| CakTSSR01709 | CakTC25825 | (CCG)5   | 467  | 481  | --         | WRKY         | TCATCTACACTCCGATCTCAC   | CTGAGGATTTGAAATGAAC   | 55.2,54.04  | 145 |
| CakTSSR01710 | CakTC25831 | (GAA)5   | 1924 | 1938 | --         | --           | CTACATTTCTCCACCAGTCT    | GAATTCGACTTCAACGAATC  | 55.83,54.82 | 141 |
| CakTSSR01711 | CakTC25831 | (TTG)5   | 2089 | 2103 | --         | --           | ATTGGGGTTCATAATAGGTGT   | CCGAAGATACACAACAATTC  | 55,54.83    | 164 |
| CakTSSR01712 | CakTC25838 | (AAAT)5  | 254  | 273  | --         | --           | TCGTGAGATAATCAAACTTGT   | CGTCTCAATCATTTCTTTCA  | 54.17,55.53 | 230 |
| CakTSSR01713 | CakTC25840 | (ACC)5   | 113  | 127  | --         | C2C2-CO-like | ACAAATGTTGGAGCAAGAAC    | ACATAAGTAAGCCAAGTCTGC | 55.28,53.93 | 154 |
| CakTSSR01714 | CakTC25840 | (GTG)5   | 717  | 731  | --         | C2C2-CO-like | TTGTTTAATGGTGAAGTTGATG  | AAAATTCTGTACTTGTGCTG  | 55.34,54.98 | 147 |
| CakTSSR01715 | CakTC25851 | (CCG)5   | 1764 | 1778 | --         | --           | AACGCTCTAAACCTTCAAT     | GACGGAAGAAAGAAGACTGAT | 55.01,55.17 | 161 |
| CakTSSR01716 | CakTC25852 | (AC)8    | 1697 | 1712 | --         | --           |                         |                       |             |     |
| CakTSSR01717 | CakTC25853 | (AC)8    | 1576 | 1591 | --         | --           |                         |                       |             |     |
| CakTSSR01718 | CakTC25854 | (CA)6    | 1170 | 1181 | --         | Tify         | AAAATTTAGGATGACACATGC   | CCTATCCTTCTCTTCCAG    | 54.35,54.88 | 154 |
| CakTSSR01719 | CakTC25854 | (ATT)5   | 1960 | 1974 | --         | Tify         | ATCTGTTTTGCCAGAACTTT    | AAGCCAAAGTTACAATGACAA | 55.69,55.07 | 170 |
| CakTSSR01720 | CakTC25855 | (TAA)11  | 46   | 78   | --         | --           |                         |                       |             |     |
| CakTSSR01721 | CakTC25859 | (AG)6    | 1128 | 1139 | --         | --           | TTGTTGTGTAGTTTGGTCA     | CATCACTCCAACCTCTAGTCA | 55.04,55.3  | 150 |
| CakTSSR01722 | CakTC25871 | (TTC)5   | 1736 | 1750 | --         | --           | TGAAACATTGTTGCTTGAGTA   | CTGGCTTCAACACTTTTACAC | 54.51,55.14 | 149 |
| CakTSSR01723 | CakTC25876 | (GGT)5   | 2749 | 2763 | --         | --           | TGATAGGACCTTGTGTTGAG    | TCACACAGGAAGACCATTAT  | 55.31,54.64 | 150 |
| CakTSSR01724 | CakTC25887 | (AG)7    | 1024 | 1037 | --         | --           | ATAATGAATCTGTGCGTCAC    | TCTCTAAATCTCCATGTTGC  | 55.25,54.62 | 156 |
| CakTSSR01725 | CakTC25887 | (TC)10   | 1263 | 1282 | --         | --           |                         |                       |             |     |
| CakTSSR01726 | CakTC25888 | (TC)7    | 30   | 43   | --         | --           |                         |                       |             |     |
| CakTSSR01727 | CakTC25898 | (TCT)5   | 1332 | 1346 | --         | --           | ATCGACGAGGAAGATAAAAT    | CACAACAATAACAAACCGTCT | 54.7,55.26  | 149 |
| CakTSSR01728 | CakTC25904 | (AAT)6   | 3265 | 3282 | --         | --           | TTGATCTCTCAAGGCTGATA    | ACCTTTTCACTAACCACATGA | 55.19,54.72 | 150 |
| CakTSSR01729 | CakTC25913 | (GAG)5   | 235  | 249  | --         | --           | TAGAACCGGAACCATACATC    | CTCCTTGAGGTGTTCTTCTT  | 55,55.26    | 144 |
| CakTSSR01730 | CakTC25913 | (TC)7    | 2509 | 2522 | --         | --           | TGTTTGTAGCCTCAGTTGAT    | TGAATGAGTGAACTTGATGA  | 55.05,54.16 | 155 |
| CakTSSR01731 | CakTC25914 | (TTC)6   | 181  | 198  | --         | --           | TTGCGTTATTACTCGACATTT   | CTCGGATGCGTAACAC      | 55.2,55.95  | 152 |
| CakTSSR01732 | CakTC25919 | (TC)12   | 1    | 24   | --         | --           |                         |                       |             |     |
| CakTSSR01733 | CakTC25922 | (ATG)5   | 1201 | 1215 | Flower bud | --           | AGGTAAGGATGGTGAAGAAAA   | CCTCCACATCTTATCCTTCT  | 55.47,54.99 | 152 |
| CakTSSR01734 | CakTC25926 | (CAT)5   | 489  | 503  | --         | --           | AACATGCTTTTCTCAATGTG    | GTTTTCCATTGAAACAACAC  | 55.47,54.7  | 150 |
| CakTSSR01735 | CakTC25926 | (GAA)5   | 935  | 949  | --         | --           | GAGCCTAAAGGTAGTGAAGG    | TATGCGGATACTACTTTGTC  | 55,54.56    | 145 |

|              |            |        |      |      |           |      |                       |                        |             |     |
|--------------|------------|--------|------|------|-----------|------|-----------------------|------------------------|-------------|-----|
| CakTSSR01736 | CakTC25927 | (TC)9  | 75   | 92   | --        | --   |                       |                        |             |     |
| CakTSSR01737 | CakTC25951 | (ATA)5 | 241  | 255  | --        | --   | TAGAACATTTGCCTTGGATAA | GCCATTCAGAGCTAGTATCAG  | 55.1,54.4   | 151 |
| CakTSSR01738 | CakTC25960 | (AT)7  | 1192 | 1205 | --        | --   | GCGTATCACCAAAGTAAACA  | CACCTAGTAGGAAAAGGCTTC  | 55.51,55    | 143 |
| CakTSSR01739 | CakTC25964 | (ACC)5 | 516  | 530  | --        | --   | ATTCCACCTGAACTCGATAAT | CAGCAACAGGTTTGGTAGT    | 55.26,55.41 | 148 |
| CakTSSR01740 | CakTC25964 | (GA)6  | 1660 | 1671 | --        | --   |                       |                        |             |     |
| CakTSSR01741 | CakTC25970 | (TTA)5 | 813  | 827  | --        | --   | GCTTCTGAATTTTCATTGTTG | TATGCGACGATAGAAGAGAGA  | 55.12,55.39 | 163 |
| CakTSSR01742 | CakTC25970 | (GTT)5 | 1444 | 1458 | --        | --   | TTAGCAAGGTTAAGACATTCG | AATCTTGACAAATTCCTCGAT  | 54.93,55.39 | 146 |
| CakTSSR01743 | CakTC25972 | (TTA)6 | 59   | 76   | --        | --   |                       |                        |             |     |
| CakTSSR01744 | CakTC25975 | (TG)6  | 893  | 904  | --        | --   |                       |                        |             |     |
| CakTSSR01745 | CakTC25981 | (AAG)5 | 182  | 196  | --        | --   | CAAAAACAAAGCAGAAGAGAA | ACCAACTGGTTATTGTTGTTG  | 55.08,55.1  | 147 |
| CakTSSR01746 | CakTC26013 | (CT)10 | 1    | 20   | --        | --   |                       |                        |             |     |
| CakTSSR01747 | CakTC26014 | (GA)9  | 1613 | 1630 | Young_pod | --   |                       |                        |             |     |
| CakTSSR01748 | CakTC26015 | (AG)6  | 1149 | 1160 | --        | IWS1 | TCAAAATAGTTCCTCTTGG   | CAATCTCAGACCTTAGTGTGC  | 53.86,55.04 | 155 |
| CakTSSR01749 | CakTC26028 | (TCT)5 | 392  | 406  | --        | C2H2 | TTATTGGAAGGAAATGACTT  | ACGCAAAGATTAGAGCAATA   | 55.55,54.62 | 150 |
| CakTSSR01750 | CakTC26029 | (AAT)5 | 214  | 228  | --        | --   | AGGAGGAGGTTGGTGATAGTA | CGGAGTCTAGAAAGAAAGAGG  | 55.34,55.12 | 152 |
| CakTSSR01751 | CakTC26030 | (GAA)6 | 1406 | 1423 | --        | --   | TGCTAGCCAAGATTCAAGTAG | AAGGAAAAAGAAATCACACGAT | 55.07,55.46 | 157 |
| CakTSSR01752 | CakTC26031 | (TTC)6 | 129  | 146  | --        | --   | AAACGAAAGAAACATAGCAGA | ATTACCACCTTATGCGAAGTA  | 54.48,54.19 | 152 |
| CakTSSR01753 | CakTC26035 | (TC)8  | 2437 | 2452 | --        | --   |                       |                        |             |     |
| CakTSSR01754 | CakTC26043 | (TTG)5 | 211  | 225  | --        | --   | CTTCCAAACCCTAAACCTTAC | AAACGGAGGTCACAAAATAT   | 54.72,55.42 | 148 |
| CakTSSR01755 | CakTC26045 | (CT)6  | 3481 | 3492 | --        | --   |                       |                        |             |     |
| CakTSSR01756 | CakTC26049 | (GA)9  | 4331 | 4348 | --        | --   |                       |                        |             |     |
| CakTSSR01757 | CakTC26050 | (AG)10 | 3407 | 3426 | --        | --   |                       |                        |             |     |
| CakTSSR01758 | CakTC26051 | (AG)8  | 1089 | 1104 | --        | --   | CAITATTATTGGTTGGATGGA | GTTTTCTTCGCTATTCTCC    | 54.98,55.05 | 151 |
| CakTSSR01759 | CakTC26052 | (CTT)7 | 88   | 108  | --        | --   |                       |                        |             |     |
| CakTSSR01760 | CakTC26053 | (TGA)6 | 2692 | 2709 | --        | --   | GCACAATTGGAGAAGTTAGAA | CCCACTCTCTAACATGAAGC   | 54.7,55.04  | 149 |
| CakTSSR01761 | CakTC26063 | (GCC)5 | 917  | 931  | --        | --   | CTTGACTTTGTTGATCAGAGG | ATCTCCAACATTCTCTTCCTT  | 55.01,54.53 | 149 |
| CakTSSR01762 | CakTC26065 | (GA)8  | 384  | 399  | --        | --   | TGCTTTGTCTCTCACTCTCC  | ACTTTGTTGAGCCATATGAAA  | 54.48,54.99 | 146 |
| CakTSSR01763 | CakTC26074 | (CA)10 | 125  | 144  | --        | --   | CCCACAATAAGCTTACACAAA | GATCCAACCACAGATGAATTA  | 55.52,54.98 | 185 |
| CakTSSR01764 | CakTC26082 | (TTC)5 | 2295 | 2309 | --        | --   | AACCCCAACCTCTCTTACAC  | TGTTAGGGTCTTTCTGATGA   | 54.96,54.95 | 149 |
| CakTSSR01765 | CakTC26091 | (AG)6  | 4858 | 4869 | --        | --   |                       |                        |             |     |
| CakTSSR01766 | CakTC26096 | (AT)6  | 50   | 61   | --        | --   |                       |                        |             |     |
| CakTSSR01767 | CakTC26097 | (CAT)9 | 74   | 100  | --        | --   |                       |                        |             |     |
| CakTSSR01768 | CakTC26103 | (AT)7  | 3585 | 3598 | --        | --   | AAAGTGAATTATTGGTGTGG  | CTTTAATTCTCTGCAACTCG   | 54.29,54.66 | 145 |
| CakTSSR01769 | CakTC26147 | (TTG)5 | 2160 | 2174 | --        | --   |                       |                        |             |     |
| CakTSSR01770 | CakTC26148 | (GA)11 | 1080 | 1101 | --        | --   | GTCAATGGTGTCAATCTGTT  | ACCTTAAGCCTAATCTCCAA   | 54.95,54.94 | 156 |
| CakTSSR01771 | CakTC26148 | (TTG)5 | 2208 | 2222 | --        | --   |                       |                        |             |     |
| CakTSSR01772 | CakTC26149 | (CAC)5 | 3344 | 3358 | --        | --   | CAGTGACATTGCTAACATCAA | CGCTCTTCTATGGAGAACTTT  | 54.79,55.54 | 140 |

|              |            |          |      |      |           |         |                       |                       |             |     |
|--------------|------------|----------|------|------|-----------|---------|-----------------------|-----------------------|-------------|-----|
| CakTSSR01773 | CakTC26149 | (TTC)5   | 4166 | 4180 | --        | --      | TAGGAAACTTTTCACCAACA  | CAAGAAACAACAAATGGAAG  | 55.05,55.05 | 151 |
| CakTSSR01774 | CakTC26153 | (CAC)5   | 254  | 268  | Young_pod | --      | GGTTAAACTCCTCAAATGGAT | GGAGAAGTGGTGGATCTACTG | 54.84,56.27 | 129 |
| CakTSSR01775 | CakTC26153 | (GGT)5   | 617  | 631  | Young_pod | --      | GGAGAAGTGGTGGATCTACTG | GGTTAAACTCCTCAAATGGAT | 56.27,54.84 | 129 |
| CakTSSR01776 | CakTC26154 | (GGT)6   | 462  | 479  | --        | --      | CATCTACTGGAAGACGGAGTA | CTCATTTTTCCGGTTAAACTC | 54.56,55.63 | 131 |
| CakTSSR01777 | CakTC26159 | (TC)7    | 31   | 44   | --        | TPR     |                       |                       |             |     |
| CakTSSR01778 | CakTC26197 | (CTTTT)5 | 1375 | 1399 | --        | --      |                       |                       |             |     |
| CakTSSR01779 | CakTC26205 | (TTG)5   | 1591 | 1605 | Young_pod | HB      | GAATACATATTCGTCGTCGTC | AAGACCAAGTCAAGGACTTTC | 54.77,55.09 | 144 |
| CakTSSR01780 | CakTC26207 | (TA)13   | 559  | 584  | --        | --      | CCATCGTCTCTCATTCTTTA  | ACTGGTTTTGGTTACATCCTT | 54.63,55.26 | 151 |
| CakTSSR01781 | CakTC26221 | (AT)12   | 1    | 24   | --        | --      |                       |                       |             |     |
| CakTSSR01782 | CakTC26221 | (TCA)5   | 824  | 838  | --        | --      | ATTAAGAAAATCAGCGCAAG  | TCCTTTAAGAAAATGGATGTG | 54.99,54.5  | 162 |
| CakTSSR01783 | CakTC26227 | (AG)8    | 1532 | 1547 | --        | --      |                       |                       |             |     |
| CakTSSR01784 | CakTC26228 | (GA)6    | 1447 | 1458 | --        | --      |                       |                       |             |     |
| CakTSSR01785 | CakTC26229 | (CT)10   | 49   | 68   | --        | ABI3VP1 |                       |                       |             |     |
| CakTSSR01786 | CakTC26234 | (TCT)8   | 3344 | 3367 | --        | --      | CAACAAGATTGTTCCTTGAG  | TCATATTTCCGTTACTTCGAC | 55.03,54.52 | 152 |
| CakTSSR01787 | CakTC26236 | (GGT)10  | 1168 | 1197 | --        | --      | GGTCATTAACGTTATCACGAG | ATGAATGAATCCCTAAATC   | 54.86,54.71 | 152 |
| CakTSSR01788 | CakTC26250 | (AAT)19  | 797  | 853  | --        | AUX/IAA | ACATTATAAAATGCCACATCG | GAAGGAGATAGGATGCTTGTT | 55.24,55.14 | 203 |
| CakTSSR01789 | CakTC26251 | (GT)6    | 123  | 134  | --        | AUX/IAA | AATAAAAGGTGTTGGGGTAG  | GCATTCTGATTTTCTGTTTTG | 54.99,55.12 | 143 |
| CakTSSR01790 | CakTC26251 | (TCA)5   | 838  | 852  | --        | AUX/IAA | TCCACCAAGTAGTGAAGATTG | CCTTCATAGGTTGATTGATG  | 55.31,54.76 | 152 |
| CakTSSR01791 | CakTC26263 | (TGG)8   | 276  | 299  | --        | --      | AAGGTTCTGCTGGTAAGAAAT | TGTGGTCACGTCCTCTAATAC | 54.84,55.17 | 159 |
| CakTSSR01792 | CakTC26264 | (CT)9    | 53   | 70   | --        | --      |                       |                       |             |     |
| CakTSSR01793 | CakTC26269 | (GA)7    | 2059 | 2072 | --        | --      | AGAAGTTGCAAAACCTAATCC | CTACTCTCTCCTCTCCCTCAA | 55.23,55.35 | 166 |
| CakTSSR01794 | CakTC26293 | (CAA)5   | 207  | 221  | --        | --      | ACGGAATCTCTTCTCTTCTC  | TGTCATTTTTCAGTCACTTTT | 54.41,54.85 | 153 |
| CakTSSR01795 | CakTC26297 | (CT)9    | 88   | 105  | --        | --      |                       |                       |             |     |
| CakTSSR01796 | CakTC26298 | (GA)6    | 29   | 40   | --        | --      |                       |                       |             |     |
| CakTSSR01797 | CakTC26299 | (TGG)5   | 183  | 197  | --        | MADS    | GTTGACAGAAGGAAACAAGTG | GAGTAATTACATGGCAGGATG | 54.92,54.78 | 181 |
| CakTSSR01798 | CakTC26301 | (CT)10   | 216  | 235  | --        | --      | AGAAACTGTCTCTCCTTCGT  | CGGCTGTAGATATAGGCAAG  | 54.84,55.3  | 150 |
| CakTSSR01799 | CakTC26301 | (TAC)5   | 1872 | 1886 | --        | --      | TTCAGTTGAGTGAGGACACTT | CCATAACAAAAGAAATGCAC  | 54.89,55.01 | 145 |
| CakTSSR01800 | CakTC26303 | (GAA)6   | 1541 | 1558 | --        | --      | ACATGCAATCTAACTCTGGAA | TCCAACCCTCTCTCTATTTC  | 54.97,55.1  | 157 |
| CakTSSR01801 | CakTC26303 | (AGA)6   | 1702 | 1719 | --        | --      |                       |                       |             |     |
| CakTSSR01802 | CakTC26308 | (AG)19   | 1446 | 1483 | --        | --      |                       |                       |             |     |
| CakTSSR01803 | CakTC26337 | (TG)6    | 1727 | 1738 | --        | --      |                       |                       |             |     |
| CakTSSR01804 | CakTC26341 | (AG)6    | 6622 | 6633 | --        | --      | GCCTCCTTTAACAACCTCTCT | AATAAAAAGAAACCACCAAC  | 54.56,54.94 | 148 |
| CakTSSR01805 | CakTC26349 | (CT)8    | 122  | 137  | --        | --      | TAGGACCGCTCCTTCTATACT | GATCGAACACTCACTCACAAT | 54.96,55.1  | 150 |
| CakTSSR01806 | CakTC26354 | (AT)9    | 36   | 53   | --        | --      |                       |                       |             |     |
| CakTSSR01807 | CakTC26361 | (GA)11   | 1518 | 1539 | --        | --      |                       |                       |             |     |
| CakTSSR01808 | CakTC26377 | (AG)7    | 1318 | 1331 | --        | --      | CCGACATTTTCTTCTCTTTT  | ACCCTAGAATTCAATTCCAC  | 55.36,54.84 | 141 |
| CakTSSR01809 | CakTC26378 | (TC)7    | 57   | 70   | --        | --      |                       |                       |             |     |

|              |            |          |      |      |            |           |                        |                       |             |     |
|--------------|------------|----------|------|------|------------|-----------|------------------------|-----------------------|-------------|-----|
| CakTSSR01810 | CakTC26397 | (TC)8    | 46   | 61   | --         | --        |                        |                       |             |     |
| CakTSSR01811 | CakTC26400 | (TTTC)5  | 3    | 22   | --         | --        |                        |                       |             |     |
| CakTSSR01812 | CakTC26417 | (TC)8    | 1    | 16   | --         | --        |                        |                       |             |     |
| CakTSSR01813 | CakTC26421 | (CT)6    | 153  | 164  | --         | AP2-EREBP | CTTCACTCTTCACTCTCCTCA  | TGTTTAGCTGCATGAAGTTGT | 54.68,56.16 | 148 |
| CakTSSR01814 | CakTC26431 | (TC)8    | 14   | 29   | --         | --        |                        |                       |             |     |
| CakTSSR01815 | CakTC26433 | (AG)6    | 3117 | 3128 | --         | --        |                        |                       |             |     |
| CakTSSR01816 | CakTC26435 | (ACCAC)5 | 21   | 45   | --         | --        |                        |                       |             |     |
| CakTSSR01817 | CakTC26442 | (AAG)7   | 2074 | 2094 | --         | --        | GGAGTTGTTTAAGGGTAAAGC  | CATCTTCCGGTGATTGAG    | 54.86,54.79 | 152 |
| CakTSSR01818 | CakTC26444 | (CA)7    | 12   | 25   | --         | AP2-EREBP |                        |                       |             |     |
| CakTSSR01819 | CakTC26446 | (CT)7    | 2648 | 2661 | --         | --        |                        |                       |             |     |
| CakTSSR01820 | CakTC26448 | (GAT)8   | 3428 | 3451 | --         | --        |                        |                       |             |     |
| CakTSSR01821 | CakTC26451 | (GA)6    | 1614 | 1625 | --         | --        |                        |                       |             |     |
| CakTSSR01822 | CakTC26455 | (CT)14   | 52   | 79   | --         | --        |                        |                       |             |     |
| CakTSSR01823 | CakTC26456 | (TC)6    | 75   | 86   | --         | --        |                        |                       |             |     |
| CakTSSR01824 | CakTC26460 | (GA)10   | 74   | 93   | --         | --        |                        |                       |             |     |
| CakTSSR01825 | CakTC26460 | (AGC)5   | 199  | 213  | --         | --        | GGTCATTCTTTGAACCCTAAT  | CTGTTGTTGAAGAAGAGCTTG | 54.84,55.43 | 163 |
| CakTSSR01826 | CakTC26461 | (TGT)5   | 857  | 871  | --         | --        | AACCATATTGCTGATTTCTGTG | GAAGAAATGGTGATGTGAATG | 55.26,55.48 | 138 |
| CakTSSR01827 | CakTC26463 | (TC)10   | 443  | 462  | --         | --        | CTTTGCTTCCACTACAATTC   | CATTTTGTCTGTTTAGAAGGA | 54.32,54.9  | 151 |
| CakTSSR01828 | CakTC26463 | (ACA)7   | 590  | 610  | --         | --        | TCCTTCTAAACAGCAAAAATG  | GATCATAACCCCTGTTTCTCT | 54.9,54.82  | 155 |
| CakTSSR01829 | CakTC26463 | (CAA)5   | 834  | 848  | --         | --        | CCATTCACTTTTCAATCTGAG  | GTTGTTGTTGAAATTGTAGCC | 54.95,54.9  | 151 |
| CakTSSR01830 | CakTC26464 | (GTT)7   | 81   | 101  | --         | --        |                        |                       |             |     |
| CakTSSR01831 | CakTC26464 | (GA)10   | 319  | 338  | --         | --        | TATTGAGCTTGAACAGCCATA  | TCCTCCTTTAATTCCTTCATC | 56.16,55.05 | 150 |
| CakTSSR01832 | CakTC26465 | (TC)6    | 131  | 142  | --         | --        | CTAACTCAACACCCCTTTTCT  | TCCATAACACAAACAGTGTGA | 55.15,54.95 | 142 |
| CakTSSR01833 | CakTC26492 | (GA)9    | 1433 | 1450 | --         | --        | GTAATTGGAAGAGGATGGAGT  | GCCATTTTTGAGAGTTTACAA | 54.82,54.73 | 141 |
| CakTSSR01834 | CakTC26511 | (TA)7    | 644  | 657  | --         | --        | TGGAAGAATTAAAGCAGCTAA  | ATACACTTGTCGGGATCTCT  | 54.76,55.33 | 155 |
| CakTSSR01835 | CakTC26513 | (CTT)9   | 186  | 212  | --         | G2-like   | AGAGCAAAACACTGCAAGTAG  | TTGTATTGGAAATGGTAAAGG | 55.04,54.41 | 150 |
| CakTSSR01836 | CakTC26513 | (AT)6    | 1878 | 1889 | --         | G2-like   |                        |                       |             |     |
| CakTSSR01837 | CakTC26514 | (AG)9    | 423  | 440  | --         | --        | AAGACAAGCAAGAAAAGGACT  | ACCAAGCAAAAGTGACTCATA | 55.02,55.05 | 152 |
| CakTSSR01838 | CakTC26515 | (TC)10   | 14   | 33   | Flower bud | --        |                        |                       |             |     |
| CakTSSR01839 | CakTC26519 | (AT)14   | 1932 | 1959 | --         | --        | GCTGCTGCAATAGCTTATAC   | TTAATGGTTGGTAAGAATGGA | 54.8,54.78  | 146 |
| CakTSSR01840 | CakTC26521 | (TC)8    | 27   | 42   | --         | --        |                        |                       |             |     |
| CakTSSR01841 | CakTC26529 | (GA)25   | 2090 | 2139 | --         | --        |                        |                       |             |     |
| CakTSSR01842 | CakTC26535 | (CTT)8   | 1    | 24   | --         | --        |                        |                       |             |     |
| CakTSSR01843 | CakTC26536 | (AG)9    | 5    | 22   | --         | --        |                        |                       |             |     |
| CakTSSR01844 | CakTC26537 | (AG)8    | 15   | 30   | --         | --        |                        |                       |             |     |
| CakTSSR01845 | CakTC26538 | (GAA)6   | 636  | 653  | --         | --        | ATGGAGAGAAAGGAGAAGAAA  | GATTGGGTTCACTTACCTTTT | 54.83,54.92 | 150 |
| CakTSSR01846 | CakTC26546 | (AAG)7   | 1840 | 1860 | --         | bZIP      | TCCATGTGATTGTTGAGTGTA  | GTTTCAGATTACGGTTGTG   | 54.86,54.91 | 151 |

|              |            |           |      |      |            |      |                       |                        |             |     |
|--------------|------------|-----------|------|------|------------|------|-----------------------|------------------------|-------------|-----|
| CakTSSR01847 | CakTC26559 | (TA)10    | 2130 | 2149 | Young_pod  | --   | TTTGGCAGCTTACTCAACTAT | TCAGCCACATCTCAAAAATAC  | 54.52,55.39 | 150 |
| CakTSSR01848 | CakTC26562 | (CT)6     | 1855 | 1866 | --         | --   | ATCTTTGTTTTCGGCTTCTT  | TTCCAGAATATAAGCACAAAGC | 55.76,54.84 | 152 |
| CakTSSR01849 | CakTC26580 | (ATA)7    | 1575 | 1595 | Flower bud | --   |                       |                        |             |     |
| CakTSSR01850 | CakTC26583 | (AAG)7    | 2064 | 2084 | --         | --   |                       |                        |             |     |
| CakTSSR01851 | CakTC26595 | (GAA)9    | 2021 | 2047 | --         | --   | CCAGTCTGAATCTGAACCATA | TTTCAACAATCACCACCTTCTT | 55.23,54.85 | 148 |
| CakTSSR01852 | CakTC26596 | (GAA)9    | 1074 | 1100 | --         | --   | CCAGTCTGAATCTGAACCATA | TTTCAACAATCACCACCTTCTT | 55.23,54.85 | 148 |
| CakTSSR01853 | CakTC26608 | (GAA)5    | 56   | 70   | --         | --   |                       |                        |             |     |
| CakTSSR01854 | CakTC26622 | (TA)6     | 54   | 65   | --         | --   |                       |                        |             |     |
| CakTSSR01855 | CakTC26632 | (GA)6     | 215  | 226  | --         | --   | CCAAAGTTTGTTTTGATATGC | CCTTTGTTTGTGAGTTTGTT   | 55.01,54.55 | 151 |
| CakTSSR01856 | CakTC26645 | (GAA)7    | 1116 | 1136 | --         | --   | TGGTTGTAAGGAGTAATCGTG | ATCCATCTAATGTCCTCCTTC  | 55.36,54.74 | 159 |
| CakTSSR01857 | CakTC26648 | (AT)6     | 121  | 132  | --         | --   | ATATAAGGATGGCAAAAATCC | GTAGTTTTTGGGGGACTAAGA  | 54.92,55.09 | 149 |
| CakTSSR01858 | CakTC26649 | (CT)14    | 96   | 123  | --         | --   |                       |                        |             |     |
| CakTSSR01859 | CakTC26679 | (AG)10    | 2545 | 2564 | --         | --   |                       |                        |             |     |
| CakTSSR01860 | CakTC26680 | (GAG)5    | 164  | 178  | --         | --   | AGGAAGAAGCTACACTCCATC | TCTTCAGGTCTACAGTCATGG  | 55.21,55.3  | 162 |
| CakTSSR01861 | CakTC26681 | (GAG)5    | 164  | 178  | --         | --   | AGGAAGAAGCTACACTCCATC | TCTTCAGGTCTACAGTCATGG  | 55.21,55.3  | 162 |
| CakTSSR01862 | CakTC26690 | (AG)17    | 1763 | 1796 | --         | --   | TTGAGATTGGAGAGGTTGTTA | GCATAAATCACCTTCTTCTCC  | 54.95,55.54 | 146 |
| CakTSSR01863 | CakTC26693 | (GGA)5    | 1534 | 1548 | --         | --   | GTGGTGGTGATTGTTGTAGTC | CCCGTTACGTTACGTTTAACT  | 55.33,56.09 | 151 |
| CakTSSR01864 | CakTC26701 | (ATA)5    | 198  | 212  | --         | --   | TAAGATGGAAGAAAACAACCA | CAGCTTTTGAACACTTGTAG   | 54.97,55.31 | 131 |
| CakTSSR01865 | CakTC26710 | (CCT)6    | 2096 | 2113 | --         | --   | TAGGAGACATTCTGTCTGAA  | AGCACCTGATGAAGAAACA    | 54.92,54.97 | 149 |
| CakTSSR01866 | CakTC26719 | (TC)9     | 210  | 227  | --         | --   | TTACCTTTGCAATGTTTGCT  | TGGACCAAGAAAATAAAGTTGA | 55.07,54.97 | 143 |
| CakTSSR01867 | CakTC26722 | (TC)6     | 125  | 136  | --         | --   | GTTTCAGATTACATGCACTT  | GCAGAGTTATCAGAGGGAGAT  | 55.49,55.12 | 147 |
| CakTSSR01868 | CakTC26759 | (ATC)6    | 229  | 246  | --         | --   | TTCTCTTCTTCAAAATCCAGA | ATGAATCAGAGACGAGCATT   | 54.3,54.83  | 175 |
| CakTSSR01869 | CakTC26765 | (AG)8     | 1086 | 1101 | --         | --   |                       |                        |             |     |
| CakTSSR01870 | CakTC26775 | (CT)9     | 48   | 65   | --         | C3H  |                       |                        |             |     |
| CakTSSR01871 | CakTC26779 | (CTT)5    | 157  | 171  | --         | SBP  | TTACTCGCACACTTCATAAGC | AAAGTGACACCGAAGCAAT    | 55.82,54.9  | 150 |
| CakTSSR01872 | CakTC26793 | (AG)9     | 650  | 667  | --         | --   | CATCACCTGAAACGAAATTAG | CAAGAACTTCCCTTCTTCTT   | 55,54.54    | 145 |
| CakTSSR01873 | CakTC26807 | (ATA)6    | 445  | 462  | --         | --   | CGAAACAGATTCTGGTCTAAG | GGGCTACCAATTGACTAACTT  | 54.3,55.11  | 156 |
| CakTSSR01874 | CakTC26816 | (ATT)5    | 235  | 249  | --         | --   | TATGCTATCATCTGAGCCATT | CACTGATTCCAAATTCTAAGG  | 55.02,54.09 | 149 |
| CakTSSR01875 | CakTC26831 | (AG)9     | 1106 | 1123 | --         | --   |                       |                        |             |     |
| CakTSSR01876 | CakTC26834 | (TC)6     | 50   | 61   | --         | --   |                       |                        |             |     |
| CakTSSR01877 | CakTC26850 | (ACACTG)9 | 224  | 277  | --         | --   | ACGCATTTCAAATCTAGAACA | CAAAATTGAAGAGAGACGAGA  | 55.15,54.82 | 148 |
| CakTSSR01878 | CakTC26856 | (AT)6     | 47   | 58   | Flower bud | WRKY |                       |                        |             |     |
| CakTSSR01879 | CakTC26857 | (TTC)6    | 3118 | 3135 | --         | --   | GGATTGGAAGAATTCAAGTT  | GGGCTTTGACTTTCAAATAA   | 54.97,54.64 | 145 |
| CakTSSR01880 | CakTC26869 | (AGC)5    | 294  | 308  | --         | --   | TCTTGTCATCCACACTCTCTT | TGTTGACTGAGGGATAAACAC  | 54.8,55.13  | 150 |
| CakTSSR01881 | CakTC26870 | (TGC)5    | 319  | 333  | --         | --   | TGCTTTGATGTGAAGAAGAT  | CAGCAGAGAAAAATATCCTTG  | 55.1,54.41  | 151 |
| CakTSSR01882 | CakTC26872 | (ACA)6    | 179  | 196  | --         | --   | TTCCCTCTCCATCATTCTTAT | CTGCTATTGAAGTGTCTTTT   | 55.32,54.28 | 148 |
| CakTSSR01883 | CakTC26877 | (AGG)5    | 485  | 499  | --         | --   | GAATGAGGTTCACCTTGGTG  | GATTACCAAGGTGTTAAAGG   | 55.55,55.36 | 144 |

|              |            |          |      |      |            |             |                        |                        |             |     |
|--------------|------------|----------|------|------|------------|-------------|------------------------|------------------------|-------------|-----|
| CakTSSR01884 | CakTC26895 | (GAATG)5 | 355  | 379  | --         | --          | TGCTGCTTCATATACTTAGGG  | GGAATGAGTTCATCCTACTT   | 54.89,54.82 | 142 |
| CakTSSR01885 | CakTC26896 | (AT)7    | 144  | 157  | --         | --          | AACAAGTTCCCCAAAGTCTAC  | TGTGCTTATTGGCTCATAACT  | 54.98,55.18 | 136 |
| CakTSSR01886 | CakTC26905 | (GA)7    | 782  | 795  | --         | --          | GCAGCAGCAGTAGTTGTAGTT  | CACCATCTCTCTCGTGACC    | 55.07,56.53 | 154 |
| CakTSSR01887 | CakTC26908 | (TC)18   | 1    | 36   | --         | --          |                        |                        |             |     |
| CakTSSR01888 | CakTC26912 | (TTA)5   | 130  | 144  | Flower bud | --          | AAACTGACACAATTTCCCTTT  | AGCTAGTTTCCCTCAAAAATC  | 55.38,54.51 | 150 |
| CakTSSR01889 | CakTC26921 | (TCA)6   | 355  | 372  | --         | --          | TTCTTCTTCATCAGAGTTGGA  | AGATAACCCTCTCTCAAAGG   | 55.06,54.33 | 142 |
| CakTSSR01890 | CakTC26934 | (AT)10   | 3    | 22   | --         | --          |                        |                        |             |     |
| CakTSSR01891 | CakTC26937 | (TAT)6   | 658  | 675  | --         | --          | ATTAACCGTACAACCACAAAA  | TTTCTCCACCCTTTATGATTT  | 54.81,55.4  | 151 |
| CakTSSR01892 | CakTC26942 | (AAG)6   | 3080 | 3097 | --         | MYB-related |                        |                        |             |     |
| CakTSSR01893 | CakTC26962 | (TCC)5   | 3515 | 3529 | --         | --          | AAAGGAAAAGGAAAGTGGTAA  | AAAAGATCAAAATCAGTGACG  | 54.84,54.54 | 153 |
| CakTSSR01894 | CakTC26966 | (AAG)5   | 967  | 981  | --         | --          | TGTTGTCATATGGAGACCAAT  | GTACCCCAATCCTCAATGTAT  | 55.35,55.39 | 152 |
| CakTSSR01895 | CakTC26974 | (AAT)5   | 4016 | 4030 | --         | --          | GAGCTTAATGGTGAAGGAAAT  | GTCTAGGTCCATCTTCAGCAT  | 55.15,55.91 | 154 |
| CakTSSR01896 | CakTC26975 | (AAT)5   | 4630 | 4644 | --         | --          | GAGCTTAATGGTGAAGGAAAT  | GTCTAGGTCCATCTTCAGCAT  | 55.15,55.91 | 154 |
| CakTSSR01897 | CakTC26980 | (CT)9    | 1436 | 1453 | Flower bud | --          | CTAACGTTGGAAATCAAGAAG  | CATTGCAGAAGCTCAATAAG   | 54.34,55.48 | 141 |
| CakTSSR01898 | CakTC26981 | (CCA)5   | 2754 | 2768 | --         | HB          | AATGCTTATTACCATCCTTGC  | CAAAATGCGTAGTGAGTCTTC  | 55.99,55.22 | 149 |
| CakTSSR01899 | CakTC26990 | (TTTA)10 | 2    | 41   | --         | --          |                        |                        |             |     |
| CakTSSR01900 | CakTC26991 | (AG)8    | 2253 | 2268 | --         | --          | TGTAGCGAAGAAGAAAATGAG  | GAAACATCCTTGACAGTCCTT  | 55.04,55.79 | 171 |
| CakTSSR01901 | CakTC26999 | (TC)6    | 74   | 85   | --         | --          |                        |                        |             |     |
| CakTSSR01902 | CakTC27001 | (GT)6    | 1615 | 1626 | Young_pod  | --          |                        |                        |             |     |
| CakTSSR01903 | CakTC27003 | (TC)6    | 60   | 71   | --         | --          |                        |                        |             |     |
| CakTSSR01904 | CakTC27017 | (TC)8    | 72   | 87   | --         | TRAF        |                        |                        |             |     |
| CakTSSR01905 | CakTC27019 | (TGA)5   | 1667 | 1681 | --         | --          | GATCCATGTTTTCGAATTGTT  | GAAAACGGTTGTTCAATTTAC  | 54.95,54.04 | 146 |
| CakTSSR01906 | CakTC27021 | (ATT)6   | 95   | 112  | --         | --          |                        |                        |             |     |
| CakTSSR01907 | CakTC27022 | (AAT)7   | 511  | 531  | --         | --          | TTTTAACCGCATTAAACACAAC | TTTTTAGCTTCTTAGCCATA   | 55.51,53.98 | 153 |
| CakTSSR01908 | CakTC27023 | (ATT)5   | 1292 | 1306 | --         | --          |                        |                        |             |     |
| CakTSSR01909 | CakTC27027 | (TC)7    | 251  | 264  | --         | HSF         | CGTAACTAACGCAGTACCTTC  | GACGAGTTTTGTTGTGAAGAG  | 54.48,55.08 | 143 |
| CakTSSR01910 | CakTC27029 | (TTC)5   | 2207 | 2221 | --         | SET         | TTCTTAACCAGACTTTCCTC   | AGGTCGTAGAGGAGAAAGAAA  | 55.2,54.95  | 161 |
| CakTSSR01911 | CakTC27030 | (GT)8    | 6    | 21   | --         | LIM         |                        |                        |             |     |
| CakTSSR01912 | CakTC27036 | (TAA)5   | 48   | 62   | --         | --          |                        |                        |             |     |
| CakTSSR01913 | CakTC27040 | (AT)8    | 86   | 101  | --         | --          |                        |                        |             |     |
| CakTSSR01914 | CakTC27041 | (ACA)6   | 269  | 286  | --         | --          | GCTAACGATTTTCTTCCAAT   | CAGATGTCGAATCATCAGAAT  | 55.32,55.13 | 148 |
| CakTSSR01915 | CakTC27062 | (CT)10   | 1802 | 1821 | --         | --          | CCGCTTTTGTTTAAATTGAT   | ACTTTGGCACTAGTTACATGC  | 54.7,54.68  | 151 |
| CakTSSR01916 | CakTC27085 | (CA)8    | 101  | 116  | --         | --          | TCGTACAAATTTCTCTCCAAA  | CAACCAGTGATGAAAAAGAAG  | 55.13,55.03 | 142 |
| CakTSSR01917 | CakTC27088 | (AG)8    | 1556 | 1571 | Flower bud | --          |                        |                        |             |     |
| CakTSSR01918 | CakTC27095 | (CAC)6   | 543  | 560  | --         | --          | GCGCATAAAAACACTTTCTAA  | CCAACAAGTGAAGAATCAAAG  | 55.09,55.03 | 159 |
| CakTSSR01919 | CakTC27102 | (AT)6    | 172  | 183  | --         | --          | AACAGAAGTGGCATGAAACTA  | AATTGAATCTTGATGGAGTGTT | 55.05,55.32 | 141 |
| CakTSSR01920 | CakTC27108 | (AG)7    | 217  | 230  | --         | --          | GGTGTTTGAATTGTGTAGAA   | TAGCATCAACTTCATCCATTT  | 55.15,54.91 | 149 |

|              |            |           |      |      |       |              |                        |                        |             |     |
|--------------|------------|-----------|------|------|-------|--------------|------------------------|------------------------|-------------|-----|
| CakTSSR01921 | CakTC27122 | (TC)10    | 97   | 116  | --    | --           |                        |                        |             |     |
| CakTSSR01922 | CakTC27130 | (AACATG)6 | 313  | 348  | --    | --           | TTTTGCTAAGGATGTTATGGA  | AATTCCTTTGAACCTTTGACC  | 55.1,55.04  | 155 |
| CakTSSR01923 | CakTC27138 | (GA)16    | 2531 | 2562 | --    | --           | TAACCTTGTGTGTGATGGGAAG | TACCATTTCATCATCTCTCACC | 55.32,54.96 | 143 |
| CakTSSR01924 | CakTC27147 | (AG)7     | 767  | 780  | --    | C2C2-GATA    |                        |                        |             |     |
| CakTSSR01925 | CakTC27160 | (AAG)7    | 913  | 933  | --    | --           | AGAGGTATGATTTGGAGGAAG  | TTTGTTTTCTTCATCACTCT   | 54.99,54.08 | 151 |
| CakTSSR01926 | CakTC27164 | (GAA)5    | 1716 | 1730 | --    | --           | TGCAAAACATCACATATCTCAA | GAGATTCCACTTGTGTCAATG  | 55.14,55.56 | 141 |
| CakTSSR01927 | CakTC27173 | (ATT)6    | 230  | 247  | --    | --           | CCTACACCGTTGACAAAATTA  | AGCTTGCACCTCTCTAGTCA   | 55.36,54.64 | 149 |
| CakTSSR01928 | CakTC27222 | (CT)13    | 1776 | 1801 | --    | --           | GGTTCATGGCTAAAAATCTTC  | TTTGATTACAAAAGCTCCTA   | 55.54,55.48 | 149 |
| CakTSSR01929 | CakTC27229 | (TTC)6    | 465  | 482  | Root  | WRKY         | GAAGGAACCAACAACATCTTT  | CTTGTTGTGTGATGTTGAAA   | 55.78,54.67 | 152 |
| CakTSSR01930 | CakTC27229 | (AGG)5    | 840  | 854  | Root  | WRKY         | ATGTTTCACCCAACATCAATA  | AGGAATACAAACACCTTTTT   | 55.36,54.56 | 149 |
| CakTSSR01931 | CakTC27233 | (CCT)5    | 609  | 623  | --    | --           | GTCTGGACCTGCTGTTAGAC   | TGAAAATTGTTGAAAGGTC    | 54.81,55.18 | 145 |
| CakTSSR01932 | CakTC27236 | (CT)12    | 94   | 117  | --    | --           |                        |                        |             |     |
| CakTSSR01933 | CakTC27236 | (TA)6     | 3411 | 3422 | --    | --           | TTTCCTATCTGCACCTTGATA  | TTACATCAAGAAGGGTTTCCT  | 55.08,55.47 | 151 |
| CakTSSR01934 | CakTC27237 | (CT)12    | 7    | 30   | --    | --           |                        |                        |             |     |
| CakTSSR01935 | CakTC27241 | (TC)14    | 45   | 72   | --    | --           |                        |                        |             |     |
| CakTSSR01936 | CakTC27241 | (TGA)6    | 6738 | 6755 | --    | --           | CATGAGGATGACATTGAAAAT  | CGTCTTCTCCAAACCATTAT   | 54.98,55.9  | 163 |
| CakTSSR01937 | CakTC27243 | (CTC)5    | 152  | 166  | --    | --           | CACCTCTTCTCTTCTCTCC    | ACGAAAGTGAAGTTGAAGGTT  | 54.89,55.61 | 150 |
| CakTSSR01938 | CakTC27254 | (CCT)5    | 2019 | 2033 | --    | --           | CTGAGGATGAATTATTGTGC   | GATGGGATAACATGATAGCAA  | 54.91,55.11 | 163 |
| CakTSSR01939 | CakTC27260 | (AT)6     | 411  | 422  | --    | --           | AAGGCAGTGGAGAAGAATAAT  | TTCAGGCTTGTATGGTACATT  | 54.76,54.86 | 147 |
| CakTSSR01940 | CakTC27272 | (GA)14    | 1245 | 1272 | --    | --           |                        |                        |             |     |
| CakTSSR01941 | CakTC27274 | (GGT)5    | 1549 | 1563 | --    | --           | ACCAGAAGAGACTTGGAAATT  | GGAAAAAGTCCTTCAACAAGT  | 54.62,55.11 | 159 |
| CakTSSR01942 | CakTC27276 | (ATG)6    | 1716 | 1733 | --    | --           | GCTATTCTTTTGCTCTTCCT   | CTATTGTTCAAGGTGTTCTGGA | 54.81,55.31 | 151 |
| CakTSSR01943 | CakTC27276 | (AG)9     | 2438 | 2455 | --    | --           | GCAAGTTTTAGCTTTTGGAT   | TTTCTCCATTTTCAACTTGTC  | 55.53,54.5  | 153 |
| CakTSSR01944 | CakTC27276 | (AG)7     | 2584 | 2597 | --    | --           |                        |                        |             |     |
| CakTSSR01945 | CakTC27284 | (ATT)9    | 105  | 131  | Shoot | --           | ATCATGTTCTCTCCCTCTTC   | ATTAGAGGTGGATGATGGTTT  | 54.92,55.11 | 126 |
| CakTSSR01946 | CakTC27285 | (TC)22    | 1    | 44   | --    | --           |                        |                        |             |     |
| CakTSSR01947 | CakTC27286 | (TC)22    | 215  | 258  | --    | --           | GAACCTTCCTCTGTTTATTCC  | TTGTTAGAAATCAGCAAAAGC  | 54.57,55.04 | 152 |
| CakTSSR01948 | CakTC27289 | (ATG)5    | 3037 | 3051 | --    | --           | TCAACCATTTCTCAGACTTGT  | AGATTGAATCATCATCACAC   | 54.83,54.77 | 147 |
| CakTSSR01949 | CakTC27313 | (TC)7     | 1    | 14   | --    | --           |                        |                        |             |     |
| CakTSSR01950 | CakTC27322 | (GA)7     | 752  | 765  | --    | --           |                        |                        |             |     |
| CakTSSR01951 | CakTC27328 | (GT)8     | 1695 | 1710 | --    | FHA          | AGATGCTAGTGGTTATGCTTG  | TGTGATCTTCTGTCATCTTCA  | 54.77,54.11 | 137 |
| CakTSSR01952 | CakTC27329 | (AG)6     | 158  | 169  | --    | --           | GAAAGAGAAAACAGCAACAGAA | AAGATATGCAACACCTTATGC  | 54.91,54.55 | 158 |
| CakTSSR01953 | CakTC27334 | (CAG)7    | 2209 | 2229 | --    | C3H          | TTGGTTAAGGATGTTCTTCT   | CTACCATCTGCTCTTGCTCTA  | 55.47,55.05 | 154 |
| CakTSSR01954 | CakTC27335 | (TC)12    | 81   | 104  | --    | bZIP         |                        |                        |             |     |
| CakTSSR01955 | CakTC27335 | (CAG)5    | 1372 | 1386 | --    | bZIP         | TCCAAATTCATCTCAGAAG    | CTCTCATTTTCAAATCACCTG  | 55.26,54.95 | 162 |
| CakTSSR01956 | CakTC27341 | (TG)6     | 1906 | 1917 | --    | C2C2-CO-like | TCTATAAGCAAAAAGGGGTTT  | CATTCATACACCTTCTTTTC   | 54.96,53.91 | 166 |
| CakTSSR01957 | CakTC27342 | (TGA)5    | 509  | 523  | --    | --           | AACTTTCTCTTCATCGAAGC   | TCAATCGTCGTACCAATAAGT  | 55.5,54.86  | 162 |

|              |            |         |      |      |           |             |                       |                        |             |     |
|--------------|------------|---------|------|------|-----------|-------------|-----------------------|------------------------|-------------|-----|
| CakTSSR01958 | CakTC27343 | (GA)21  | 1442 | 1483 | --        | BES1        | CGTTGTGTTCTGGTTATGA   | AACTCATCAAAGCCTTCTCTT  | 54.6,54.94  | 145 |
| CakTSSR01959 | CakTC27346 | (AG)6   | 2332 | 2343 | --        | --          | AGACAACTCTCTTTGTCTCA  | GTTTGCATGCACTCTCTTAAT  | 54.07,54.73 | 151 |
| CakTSSR01960 | CakTC27347 | (GAT)5  | 4670 | 4684 | --        | --          | GGCAAACATCATCAGAATTA  | TCCTTCTTCTCTCCCAAAT    | 55.39,54.86 | 146 |
| CakTSSR01961 | CakTC27355 | (AG)12  | 30   | 53   | --        | --          |                       |                        |             |     |
| CakTSSR01962 | CakTC27356 | (TA)6   | 39   | 50   | --        | --          |                       |                        |             |     |
| CakTSSR01963 | CakTC27367 | (AAAT)5 | 159  | 178  | --        | --          | GTGTTGTTCTCTCCCTCTCT  | GCGATGAATCTCTGATTTA    | 55.07,54.7  | 150 |
| CakTSSR01964 | CakTC27371 | (GTT)7  | 1218 | 1238 | --        | G2-like     | GTTGTTGAGTTGTGGTATTT  | CAAGCTCACACTGAACTCTCT  | 55.04,54.79 | 146 |
| CakTSSR01965 | CakTC27407 | (CT)6   | 1    | 12   | --        | bZIP        |                       |                        |             |     |
| CakTSSR01966 | CakTC27426 | (AAC)7  | 321  | 341  | --        | MYB-related | CAGTATCATGATTTTCGGTGT | GTGGTTGTTTCGTATTGAGAGA | 55.1,55.3   | 119 |
| CakTSSR01967 | CakTC27434 | (TA)10  | 75   | 94   | --        | --          |                       |                        |             |     |
| CakTSSR01968 | CakTC27443 | (AGA)5  | 685  | 699  | --        | --          | TTATTTTGGTTCTTGAGCTTG | GAACATACACTACTCGGTGGA  | 54.9,55.17  | 145 |
| CakTSSR01969 | CakTC27467 | (TAT)5  | 236  | 250  | --        | --          | AGTGCTCTACACTCCTCCTC  | TGGTTACTGTTGTACC GTTT  | 55.28,54.87 | 141 |
| CakTSSR01970 | CakTC27469 | (AGG)5  | 2903 | 2917 | --        | --          | TGATCCAAAGCTGAGTTAAAA | GATTACGAACCTGGTGAACCT  | 55.29,55.82 | 146 |
| CakTSSR01971 | CakTC27472 | (AAT)6  | 294  | 311  | --        | G2-like     | AAGAACAAGGTGAGGACACTT | ATTTTCTCATCATCATATGC   | 55.45,55.13 | 155 |
| CakTSSR01972 | CakTC27477 | (GAA)5  | 162  | 176  | --        | --          | TCTCTCCAAACATTCCAATTA | GTCTTGCTCTTGCTCTTGTT   | 54.89,54.88 | 151 |
| CakTSSR01973 | CakTC27478 | (AG)6   | 2156 | 2167 | --        | --          |                       |                        |             |     |
| CakTSSR01974 | CakTC27481 | (AAT)5  | 1950 | 1964 | --        | --          | GTGTTGACCATAGGAATCAAA | AAAACCACCTAAGAAAGTTCC  | 55.06,54.29 | 150 |
| CakTSSR01975 | CakTC27491 | (TA)6   | 120  | 131  | --        | --          | ATATGATTTTTTGTTGAGTGG | TGAACCTTAGTTTCTTTTGGA  | 54.2,54.3   | 150 |
| CakTSSR01976 | CakTC27511 | (AAG)5  | 392  | 406  | --        | --          | ATATTGGTGGCTTAAACAATG | ATCTTCGTCCACAAC TAACAA | 54.44,54.89 | 150 |
| CakTSSR01977 | CakTC27515 | (AAG)7  | 1366 | 1386 | --        | --          |                       |                        |             |     |
| CakTSSR01978 | CakTC27525 | (GA)12  | 1729 | 1752 | --        | --          |                       |                        |             |     |
| CakTSSR01979 | CakTC27526 | (CA)6   | 2771 | 2782 | Young_pod | PHD         | TTCTTAAATTGCGTTTGCTAC | AGATTGGATGAGAAGGGTAAC  | 55.09,54.82 | 148 |
| CakTSSR01980 | CakTC27529 | (CAC)5  | 1670 | 1684 | --        | AP2-EREBP   | GGATTTCGATTTTCTCAAAC  | TTCTCTGTAGAGGTTTTC     | 55.51,55.2  | 140 |
| CakTSSR01981 | CakTC27530 | (TC)12  | 1219 | 1242 | --        | --          |                       |                        |             |     |
| CakTSSR01982 | CakTC27547 | (ACA)6  | 57   | 74   | --        | --          |                       |                        |             |     |
| CakTSSR01983 | CakTC27549 | (AG)6   | 2410 | 2421 | --        | WI/SNF-BAF6 | GGGAGTTAATTGTGGATTAGG | CCACAATCTCTTCTCTTCA    | 55.28,54.65 | 148 |
| CakTSSR01984 | CakTC27550 | (GA)11  | 4686 | 4707 | --        | --          | AGTGTTGATCAAAACAAAAG  | ACCGTTTCTCTTCTCATTTT   | 54.63,54.8  | 152 |
| CakTSSR01985 | CakTC27556 | (AGA)7  | 74   | 94   | --        | C2H2        |                       |                        |             |     |
| CakTSSR01986 | CakTC27556 | (GAT)5  | 486  | 500  | --        | C2H2        | GTTTGTGATTGTGATGAGGTT | TCTTTAAGCATCCATGAAAAC  | 54.95,54.65 | 137 |
| CakTSSR01987 | CakTC27556 | (AG)7   | 1556 | 1569 | --        | C2H2        | CTCCAGCAGATAAAACAAAAA | TTTCAACAAGTAGTGAAACA   | 54.9,55.14  | 122 |
| CakTSSR01988 | CakTC27557 | (GTT)5  | 1    | 15   | --        | --          |                       |                        |             |     |
| CakTSSR01989 | CakTC27557 | (GAT)5  | 149  | 163  | --        | --          | GTTTGTGATTGTGATGAGGTT | TCTTTAAGCATCCATGAAAAC  | 54.95,54.65 | 137 |
| CakTSSR01990 | CakTC27582 | (TC)14  | 990  | 1017 | --        | Alfin-like  |                       |                        |             |     |
| CakTSSR01991 | CakTC27590 | (AGA)7  | 1482 | 1502 | --        | --          |                       |                        |             |     |
| CakTSSR01992 | CakTC27591 | (TCT)7  | 45   | 65   | --        | --          |                       |                        |             |     |
| CakTSSR01993 | CakTC27601 | (AGA)10 | 1201 | 1230 | --        | --          | TAAAGTGAAGACCAAGAGTGC | AATTGCAATGAATGTTAGCC   | 54.76,55.33 | 154 |
| CakTSSR01994 | CakTC27609 | (AT)6   | 84   | 95   | --        | WRKY        |                       |                        |             |     |

|              |            |           |      |      |            |         |                        |                        |             |     |
|--------------|------------|-----------|------|------|------------|---------|------------------------|------------------------|-------------|-----|
| CakTSSR01995 | CakTC27609 | (TCT)5    | 792  | 806  | --         | WRKY    | TGGATCCAACCATTAAATCATA | AAATTAAGATCCGTGGTCAAT  | 55.38,55.27 | 154 |
| CakTSSR01996 | CakTC27620 | (CT)17    | 157  | 190  | --         | --      | CCTCACAACAACAAATCTTTC  | TAGTCTCTAGCTTCTGGCTGA  | 54.85,54.76 | 150 |
| CakTSSR01997 | CakTC27622 | (AG)6     | 1465 | 1476 | --         | --      |                        |                        |             |     |
| CakTSSR01998 | CakTC27634 | (GAA)6    | 2866 | 2883 | --         | --      |                        |                        |             |     |
| CakTSSR01999 | CakTC27645 | (AT)6     | 676  | 687  | --         | --      | GGTGGCATATTGATTACAAAA  | TAGCCCTCATTTATTCACAAG  | 55.21,54.7  | 169 |
| CakTSSR02000 | CakTC27653 | (TTC)5    | 353  | 367  | --         | --      | TTTCTCTCCACCTTTTCTTCT  | TACAAAAATCGTGGTGAGAGTT | 54.92,54.89 | 143 |
| CakTSSR02001 | CakTC27655 | (TTC)5    | 37   | 51   | --         | ABI3VP1 |                        |                        |             |     |
| CakTSSR02002 | CakTC27678 | (TTC)5    | 2443 | 2457 | --         | --      | ATAAACAAACCCAGAAAGGAAG | GGTGAAATTTGGATATTGGT   | 55.09,55.51 | 150 |
| CakTSSR02003 | CakTC27681 | (CA)6     | 1619 | 1630 | --         | --      | CCCTCTGAGTTTCCATCTAAG  | GAAGAACAACAGAACCCAGAA  | 55.64,54.56 | 153 |
| CakTSSR02004 | CakTC27682 | (CTT)6    | 382  | 399  | --         | --      | CCTTCTGTGTTGTTCTGGTAG  | CAGCTCGTTTTAAATATCCA   | 54.97,54.88 | 151 |
| CakTSSR02005 | CakTC27684 | (AG)7     | 92   | 105  | --         | --      |                        |                        |             |     |
| CakTSSR02006 | CakTC27685 | (AG)7     | 2584 | 2597 | --         | --      | AATTCCGTTAATCAAGGAGAG  | GTTTGTAGGTCATCATTTCT   | 55.16,55.71 | 155 |
| CakTSSR02007 | CakTC27686 | (GAA)6    | 1157 | 1174 | --         | --      |                        |                        |             |     |
| CakTSSR02008 | CakTC27687 | (CTT)6    | 54   | 71   | Flower bud | --      |                        |                        |             |     |
| CakTSSR02009 | CakTC27692 | (TC)17    | 1015 | 1048 | --         | --      |                        |                        |             |     |
| CakTSSR02010 | CakTC27697 | (TAA)6    | 231  | 248  | --         | --      | TGGTTTGTGAAGAAGAATCTC  | CTCCTACCCATATTCTCGTTT  | 54.47,55.04 | 153 |
| CakTSSR02011 | CakTC27715 | (GAA)7    | 1114 | 1134 | Young_pod  | --      | CTGTGCTGTGAATGTGACTG   | GCAGGAATCGAATGATAATAA  | 55,54.55    | 167 |
| CakTSSR02012 | CakTC27716 | (GT)7     | 281  | 294  | --         | --      | AGTGTTTGTTTGTGTGAGCAT  | GTTGGAATCAAACCTCAGAATC | 54.96,53.8  | 139 |
| CakTSSR02013 | CakTC27717 | (TG)7     | 1016 | 1029 | --         | --      |                        |                        |             |     |
| CakTSSR02014 | CakTC27727 | (AG)10    | 348  | 367  | --         | --      | ATTGTGTAACTGGGGTTGTA   | CTTTAGGCATGATTGAATGAA  | 54.63,55.49 | 149 |
| CakTSSR02015 | CakTC27742 | (GGAGCA)5 | 325  | 354  | --         | --      | GTGAAGGATATGCAAAAACC   | CCCACCTATTAATCTTCAACC  | 54.72,55.28 | 155 |
| CakTSSR02016 | CakTC27749 | (AATGA)5  | 980  | 1004 | --         | --      |                        |                        |             |     |
| CakTSSR02017 | CakTC27750 | (ACA)8    | 140  | 163  | --         | --      | ACTGAACCCTCACAATCTCA   | TTAGGGTTAGGGTTAGGGTTT  | 55.55,55.97 | 140 |
| CakTSSR02018 | CakTC27751 | (CT)8     | 196  | 211  | Flower bud | --      | GAACCTTCTTTCTGTCTTC    | CAAAGCAAAAACAGTGATGAT  | 54.74,55.47 | 152 |
| CakTSSR02019 | CakTC27761 | (CTT)5    | 445  | 459  | --         | --      | CTTTCTCAACCCTTTACACC   | TGGCTCATACCAATTTATC    | 55.55,54.47 | 148 |
| CakTSSR02020 | CakTC27764 | (AGTG)5   | 110  | 129  | --         | --      | CCAAGTTAACTGAAAAATGGA  | AGTATTACCCCTCATGGGTTG  | 54.59,55.63 | 149 |
| CakTSSR02021 | CakTC27771 | (ATA)8    | 638  | 661  | --         | TPR     | AGCAATGTAATGTTGTTGGA   | GTTGTTGAAATTGATGGTAG   | 55.76,54.83 | 145 |
| CakTSSR02022 | CakTC27778 | (TGA)5    | 352  | 366  | Young_pod  | --      | CTGATTACTCTGGTGAAGCTG  | GAACCGGATCAATCTCTATCT  | 55.22,54.9  | 150 |
| CakTSSR02023 | CakTC27823 | (AAC)6    | 26   | 43   | --         | --      |                        |                        |             |     |
| CakTSSR02024 | CakTC27824 | (CTT)6    | 358  | 375  | --         | --      | CATCACTTCCTTCAACAACAT  | CTTTGAACCCTTACTCACCTT  | 55.13,55.15 | 143 |
| CakTSSR02025 | CakTC27836 | (TCA)6    | 2953 | 2970 | --         | --      | AAGTGTTCATAAGAGCCATCT  | AAGAAGGAGAATGAAAAGAGG  | 54.85,54.46 | 153 |
| CakTSSR02026 | CakTC27840 | (TCT)5    | 1531 | 1545 | --         | --      |                        |                        |             |     |
| CakTSSR02027 | CakTC27841 | (AGA)5    | 79   | 93   | --         | --      |                        |                        |             |     |
| CakTSSR02028 | CakTC27849 | (TAA)5    | 192  | 206  | --         | --      | ACTTTTCTCACCTTCAGCTT   | GCCACCATTATGTGTAGACTC  | 55.02,54.66 | 150 |
| CakTSSR02029 | CakTC27850 | (TC)6     | 51   | 62   | --         | --      |                        |                        |             |     |
| CakTSSR02030 | CakTC27871 | (ACC)6    | 79   | 96   | Root       | --      |                        |                        |             |     |
| CakTSSR02031 | CakTC27879 | (TC)6     | 6    | 17   | --         | --      |                        |                        |             |     |

|              |            |           |      |      |            |      |                        |                        |             |     |
|--------------|------------|-----------|------|------|------------|------|------------------------|------------------------|-------------|-----|
| CakTSSR02032 | CakTC27891 | (CT)6     | 25   | 36   | --         | --   |                        |                        |             |     |
| CakTSSR02033 | CakTC27891 | (TCC)7    | 2000 | 2020 | --         | --   | GCATTATAGGTTTCAAAAGCA  | AATAAGAAGCAGATCCACCTT  | 54.86,54.76 | 176 |
| CakTSSR02034 | CakTC27893 | (TAT)5    | 686  | 700  | --         | --   | CTATTAGGTGTCCCCCTCTGAT | GAGTACAAAGACACGTTGGAG  | 54.87,54.95 | 162 |
| CakTSSR02035 | CakTC27898 | (GCA)5    | 843  | 857  | Shoot      | --   | AGCAATCACAGAATCAACAAC  | AACAGATTGCTGAGATGATTG  | 55.29,55.38 | 140 |
| CakTSSR02036 | CakTC27898 | (CAG)5    | 2522 | 2536 | Shoot      | --   | TTCAAACAACATATCAGCAG   | CTTGTCGCATTTTCATATCAT  | 54.03,55.35 | 169 |
| CakTSSR02037 | CakTC27899 | (CT)14    | 38   | 65   | --         | --   |                        |                        |             |     |
| CakTSSR02038 | CakTC27899 | (TC)6     | 3383 | 3394 | --         | --   | TTAGTGTAGCAATCTCTTCCAA | CACCGTTAACTCTAATCCAAA  | 54.51,54.62 | 180 |
| CakTSSR02039 | CakTC27904 | (TTA)5    | 192  | 206  | --         | --   | TCCAAAATTACAACCTCTCCA  | CTTATATGAAGAGCCATGGTG  | 54.97,54.96 | 151 |
| CakTSSR02040 | CakTC27905 | (TC)6     | 24   | 35   | --         | --   |                        |                        |             |     |
| CakTSSR02041 | CakTC27905 | (TC)6     | 171  | 182  | --         | --   | ATTGAAATCACCTCTTCTTC   | TAGTGTGAAGCAACCAAAATC  | 54.95,55.47 | 151 |
| CakTSSR02042 | CakTC27908 | (TTC)6    | 165  | 182  | --         | --   | ATGTACTCTTCTCCCATTCGT  | TGACTTTGAGAAAGACGAAGA  | 55.33,55.31 | 146 |
| CakTSSR02043 | CakTC27909 | (GAT)5    | 431  | 445  | --         | --   | TGAAGAAATATGGTCTGCACT  | TTTGTCTCTATCTGTTTCAG   | 54.97,54.88 | 146 |
| CakTSSR02044 | CakTC27910 | (TC)6     | 589  | 600  | --         | --   |                        |                        |             |     |
| CakTSSR02045 | CakTC27916 | (AC)9     | 283  | 300  | --         | --   | GTCCTAAAAAGGTTACCGAAA  | GCTGATAGGCTTTTCTTCTT   | 55.25,54.81 | 139 |
| CakTSSR02046 | CakTC27919 | (ATA)5    | 342  | 356  | --         | --   | CAACTCCAACACAATCTTCTC  | AACGGTGTCTAAATACAGAGGT | 54.83,55.6  | 158 |
| CakTSSR02047 | CakTC27942 | (TTG)5    | 1637 | 1651 | --         | WRKY | CCATTGGTGTCTGACTATAGAA | CATGGATTGAGATCCAATAGA  | 55.44,55.07 | 148 |
| CakTSSR02048 | CakTC27947 | (CTT)9    | 786  | 812  | --         | --   |                        |                        |             |     |
| CakTSSR02049 | CakTC27953 | (AG)7     | 358  | 371  | --         | --   | GTTCTCTCAAACAGACTCACAA | TTGTTTTACACATCCTTGTT   | 54.62,55.64 | 157 |
| CakTSSR02050 | CakTC27956 | (AGG)5    | 687  | 701  | --         | --   | GGTGAAAGTGTAATGCAAAG   | ATTAACGCCCAATTCTTACT   | 55.07,54.84 | 147 |
| CakTSSR02051 | CakTC27980 | (TGA)5    | 750  | 764  | --         | --   | GGATGAGGAGGATAACATACC  | ATTCTGTGAAAACTTTGCTGA  | 55.02,55.18 | 148 |
| CakTSSR02052 | CakTC27980 | (GAC)5    | 1060 | 1074 | --         | --   | TCCAACCTCATCAGTTATTGC  | TTCTTCATGGAAGATGGTTTA  | 55.39,54.89 | 147 |
| CakTSSR02053 | CakTC27983 | (AG)19    | 2844 | 2881 | --         | --   |                        |                        |             |     |
| CakTSSR02054 | CakTC27984 | (AT)7     | 2771 | 2784 | --         | --   | GTTCTGAACCAAACTTGATG   | AGACCAITTATCCTCTCTCTGC | 54.85,55.12 | 150 |
| CakTSSR02055 | CakTC27985 | (AT)6     | 2922 | 2933 | --         | --   | TGGCCTTATGAATGATGTATT  | TCATCAACCAGTTCTTTCATC  | 54.72,55.18 | 163 |
| CakTSSR02056 | CakTC27989 | (AGAAGC)5 | 1113 | 1142 | --         | --   |                        |                        |             |     |
| CakTSSR02057 | CakTC27998 | (GTCATT)5 | 455  | 484  | --         | --   | GCTTCCCAAGTTGATATGATT  | GGCACTTGATCAGAGAAAAA   | 55.82,54.7  | 151 |
| CakTSSR02058 | CakTC28015 | (AT)6     | 3    | 14   | --         | --   |                        |                        |             |     |
| CakTSSR02059 | CakTC28020 | (TTC)6    | 177  | 194  | --         | ARF  | GAGTATTGGGTGAGGTCTTT   | GGTGTGTTTGAGTAGTGGAG   | 54.9,54.78  | 146 |
| CakTSSR02060 | CakTC28049 | (TGA)5    | 1427 | 1441 | --         | GRAS |                        |                        |             |     |
| CakTSSR02061 | CakTC28050 | (AG)8     | 2151 | 2166 | --         | --   |                        |                        |             |     |
| CakTSSR02062 | CakTC28062 | (ATA)7    | 948  | 968  | Shoot      | MYB  | ATGAAAATGGGTTTGGTTTA   | AACTGGTTGCTGTTATCTGAA  | 54.6,55.05  | 151 |
| CakTSSR02063 | CakTC28067 | (AG)16    | 1304 | 1335 | --         | --   |                        |                        |             |     |
| CakTSSR02064 | CakTC28076 | (AT)6     | 2930 | 2941 | --         | --   |                        |                        |             |     |
| CakTSSR02065 | CakTC28082 | (ATTA)5   | 68   | 87   | --         | --   |                        |                        |             |     |
| CakTSSR02066 | CakTC28083 | (ATTA)5   | 939  | 958  | Flower bud | --   |                        |                        |             |     |
| CakTSSR02067 | CakTC28084 | (ATA)5    | 253  | 267  | --         | --   | GAATGAAAGGAAATCATTGTG  | CTAGTGGAAGCTTCAGAGACA  | 54.71,54.92 | 149 |
| CakTSSR02068 | CakTC28092 | (TC)16    | 1762 | 1793 | --         | --   | GTGGGTTATCTGGACTTGAA   | ATGTGGGAGTTATGAGTGTTG  | 55.03,55    | 173 |

|              |            |         |      |      |            |            |                        |                        |             |     |
|--------------|------------|---------|------|------|------------|------------|------------------------|------------------------|-------------|-----|
| CakTSSR02069 | CakTC28092 | (ACC)6  | 1899 | 1916 | --         | --         | GCCTCTCCAACACTCATAACT  | GATGGAGGAGGTGGTAGATAG  | 55.98,55.26 | 156 |
| CakTSSR02070 | CakTC28094 | (TC)6   | 145  | 156  | --         | --         | AATGTTTCGCTCACATTTCTAC | CACATGAAGAGGCTAAAGAAA  | 54.56,54.88 | 158 |
| CakTSSR02071 | CakTC28100 | (CTG)5  | 1111 | 1125 | --         | --         | TTTAGTGACTGGATGCTTTGC  | ATCACTGGCACTCACACTTAC  | 55.47,55.23 | 156 |
| CakTSSR02072 | CakTC28103 | (AG)7   | 5677 | 5690 | --         | --         |                        |                        |             |     |
| CakTSSR02073 | CakTC28110 | (AG)7   | 5619 | 5632 | --         | PHD        |                        |                        |             |     |
| CakTSSR02074 | CakTC28116 | (GTG)8  | 1614 | 1637 | --         | --         |                        |                        |             |     |
| CakTSSR02075 | CakTC28127 | (AAC)5  | 133  | 147  | --         | --         | CACTTTGCAGTGTC AATTTTA | TGAAATTAGGTTTTCCGTGTA  | 54.12,55.02 | 167 |
| CakTSSR02076 | CakTC28136 | (AT)9   | 2348 | 2365 | --         | --         |                        |                        |             |     |
| CakTSSR02077 | CakTC28139 | (AT)6   | 112  | 123  | --         | Alfin-like | TAGTCAATGGTCCTTGAAAAG  | ATCCTTCATAGGTTTCATACCC | 54.55,54.64 | 138 |
| CakTSSR02078 | CakTC28150 | (CT)14  | 18   | 45   | --         | --         |                        |                        |             |     |
| CakTSSR02079 | CakTC28157 | (TC)6   | 11   | 22   | --         | ABI3VP1    |                        |                        |             |     |
| CakTSSR02080 | CakTC28157 | (AAT)5  | 1434 | 1448 | --         | ABI3VP1    | CCTCCCGATCAATTCTACTAT  | AACCGTTTTCTCTCTGTATT   | 54.97,55.33 | 140 |
| CakTSSR02081 | CakTC28157 | (AAGA)6 | 1721 | 1744 | --         | ABI3VP1    | ACTTCAGTGCTGTTTGATTG   | CCAACTAACAACACTGGAAAC  | 55.55,54.09 | 155 |
| CakTSSR02082 | CakTC28164 | (GA)6   | 1999 | 2010 | --         | --         | AAGTCGATAATCCCTGTTGAT  | TACGAAAACCTCAATCTCACC  | 55.26,54.54 | 143 |
| CakTSSR02083 | CakTC28171 | (AT)7   | 56   | 69   | --         | WRKY       |                        |                        |             |     |
| CakTSSR02084 | CakTC28172 | (TCC)5  | 7    | 21   | --         | --         |                        |                        |             |     |
| CakTSSR02085 | CakTC28184 | (TC)6   | 107  | 118  | --         | --         | CAAGTCAATGACAATTTTTC   | CAGTGAGAAGAGAGATCAGGA  | 54.79,54.58 | 143 |
| CakTSSR02086 | CakTC28197 | (TA)6   | 145  | 156  | --         | --         | AAATGGCACACATAATGGTA   | TTTTTACTTTGTGCAATCGTC  | 55.56,55.63 | 143 |
| CakTSSR02087 | CakTC28200 | (GAA)5  | 1322 | 1336 | --         | --         | GAAGAGGAAGAGGAAGATGAG  | TTCGAAGGTCAATAACATCAG  | 54.81,55.4  | 136 |
| CakTSSR02088 | CakTC28222 | (TC)6   | 34   | 45   | --         | --         |                        |                        |             |     |
| CakTSSR02089 | CakTC28242 | (TCCT)8 | 2595 | 2626 | --         | --         | AAACTTTACGCAATGAATCAG  | AAGTTGCAGTGAGTGAGTGAC  | 54.77,55.44 | 142 |
| CakTSSR02090 | CakTC28242 | (AAT)5  | 2829 | 2843 | --         | --         |                        |                        |             |     |
| CakTSSR02091 | CakTC28244 | (GAG)6  | 737  | 754  | --         | --         | TGGGACTTCTCTTCATTGTGA  | TTCTCTTTCTCTTCCCTCTC   | 54.95,54.55 | 156 |
| CakTSSR02092 | CakTC28261 | (TCT)5  | 2685 | 2699 | --         | Jumonji    | CAATTGCACATCAATATCCTT  | CATCGTCAGAACAAAGAGAAG  | 55.19,55.18 | 150 |
| CakTSSR02093 | CakTC28270 | (AGA)7  | 334  | 354  | --         | WRKY       | AACGATTCCAAAAGTTACGAT  | GGGTTTCTGAATTAGGTTTAT  | 55.5,54.84  | 145 |
| CakTSSR02094 | CakTC28272 | (ATG)5  | 1425 | 1439 | --         | --         | ATCCTTCTTTGTTTGATCCAT  | ATACAGAAAGCAGACCCTGTT  | 55.23,55.57 | 165 |
| CakTSSR02095 | CakTC28276 | (GTT)5  | 1889 | 1903 | --         | GRAS       | CCTCTTCCACTTCTCTTGTT   | GATGAGAGTTCCTCTGTTTC   | 55.26,55.42 | 200 |
| CakTSSR02096 | CakTC28277 | (ATA)5  | 49   | 63   | --         | --         |                        |                        |             |     |
| CakTSSR02097 | CakTC28279 | (AGC)5  | 445  | 459  | Flower bud | --         | ATCATGTGATTGGAATCTTGA  | GAAGGAAAAGGTGATGAATTT  | 55.4,54.97  | 153 |
| CakTSSR02098 | CakTC28287 | (TGT)7  | 1868 | 1888 | --         | --         | TTTTGATCAGAAAGTGGTGT   | TCAAACCATCAACAATCTCTC  | 54.85,55.18 | 151 |
| CakTSSR02099 | CakTC28295 | (CAG)5  | 1753 | 1767 | --         | AP2-EREBP  | CACACTTTTCCACATCTTCAT  | CAGTTGCTAACAAATGTGGTG  | 55.13,56.8  | 151 |
| CakTSSR02100 | CakTC28303 | (TTC)5  | 1065 | 1079 | --         | --         |                        |                        |             |     |
| CakTSSR02101 | CakTC28304 | (TTC)5  | 389  | 403  | --         | --         |                        |                        |             |     |
| CakTSSR02102 | CakTC28305 | (GT)6   | 134  | 145  | --         | --         | GGAAAAATCAGGAGCATAAAT  | TTGCTCAATATGTTGGCTAAT  | 55.09,55.12 | 154 |
| CakTSSR02103 | CakTC28333 | (AC)6   | 99   | 110  | --         | SBP        |                        |                        |             |     |
| CakTSSR02104 | CakTC28333 | (TC)7   | 348  | 361  | --         | SBP        | TCCTTCTTCATCTTTTCACG   | AGAAACCAAATCAACTTTCC   | 54.84,55.04 | 140 |
| CakTSSR02105 | CakTC28333 | (TG)6   | 466  | 477  | --         | SBP        | AGGAAAGTTGAATTTGGTTTC  | CAACTTTGCATACCCTCATAA  | 55.04,55.44 | 132 |

|              |            |         |      |      |            |      |                        |                        |             |     |
|--------------|------------|---------|------|------|------------|------|------------------------|------------------------|-------------|-----|
| CakTSSR02106 | CakTC28333 | (TGA)5  | 864  | 878  | --         | SBP  | TCATAATCAAGGTTTGTGAGGA | GCAGCCATAACAACATCACTA  | 54.89,56.37 | 141 |
| CakTSSR02107 | CakTC28336 | (TCC)6  | 42   | 59   | --         | --   |                        |                        |             |     |
| CakTSSR02108 | CakTC28348 | (AT)9   | 946  | 963  | Shoot      | --   |                        |                        |             |     |
| CakTSSR02109 | CakTC28354 | (AG)10  | 3710 | 3729 | --         | --   | TTGTTCTTGTGTGTTTGAGA   | CTCCTCTCGTAATTTTCACA   | 54.35,54.72 | 137 |
| CakTSSR02110 | CakTC28366 | (CT)8   | 67   | 82   | --         | --   |                        |                        |             |     |
| CakTSSR02111 | CakTC28376 | (CTT)7  | 5    | 25   | --         | --   |                        |                        |             |     |
| CakTSSR02112 | CakTC28383 | (GAA)5  | 44   | 58   | --         | --   |                        |                        |             |     |
| CakTSSR02113 | CakTC28383 | (AAT)6  | 1372 | 1389 | --         | --   | AGGTTCTGAAAGTCCTTCTTC  | ACTATCCTGAGAAGACCCTTG  | 54.33,55.06 | 148 |
| CakTSSR02114 | CakTC28383 | (TTC)5  | 1695 | 1709 | --         | --   | TGGTGTGAAAAGTAATGTGGT  | GATCCACACCATCTAAACAA   | 55.51,55.06 | 152 |
| CakTSSR02115 | CakTC28384 | (ATGA)5 | 2072 | 2091 | --         | --   |                        |                        |             |     |
| CakTSSR02116 | CakTC28388 | (CAC)8  | 1222 | 1245 | --         | C3H  | CAGAACCCAGTTCTCATGTAA  | ATCCGGTAAATCAACATGAAT  | 55.31,55.94 | 157 |
| CakTSSR02117 | CakTC28388 | (TC)10  | 1591 | 1610 | --         | C3H  |                        |                        |             |     |
| CakTSSR02118 | CakTC28393 | (TTC)5  | 135  | 149  | --         | --   | GTTCTCTCTTACATGCACAC   | ATGGTGTGAGGTTGTTGAATA  | 54.85,55.43 | 170 |
| CakTSSR02119 | CakTC28394 | (ATA)11 | 143  | 175  | --         | bHLH | TTGAGCACAAAGTTTCTCT    | TCCCTTCAATAGGTAAATTCC  | 55.16,54.95 | 151 |
| CakTSSR02120 | CakTC28400 | (ATT)6  | 123  | 140  | --         | --   | AACCCCAACCCATATAATTT   | TCTGGGAAGTAGATCTCACAA  | 54.93,54.92 | 164 |
| CakTSSR02121 | CakTC28401 | (ATG)6  | 1110 | 1127 | --         | --   | TACAGTGATCCTGAGGTTTGT  | AACCCCTTTCAGATAGAATTG  | 55.31,55.01 | 163 |
| CakTSSR02122 | CakTC28402 | (TTAT)6 | 186  | 209  | --         | --   | TCTATGGTGAAGAAGTTTGT   | TTGCAATAGCAATCGAATATC  | 55.05,55.59 | 144 |
| CakTSSR02123 | CakTC28407 | (AAC)7  | 654  | 674  | Root       | --   | TTATGGAGAATGTTTACGATG  | CCTTCATAACCTGAAACAAGT  | 55.21,53.58 | 153 |
| CakTSSR02124 | CakTC28411 | (TAC)6  | 293  | 310  | Flower bud | --   | TTGACAAGAGCAAACAACATA  | TGAAGCAATGTTGGATTAGT   | 54.51,54.99 | 150 |
| CakTSSR02125 | CakTC28414 | (CT)7   | 15   | 28   | --         | --   |                        |                        |             |     |
| CakTSSR02126 | CakTC28423 | (ATT)5  | 111  | 125  | --         | --   | ATAAATGGAGGCGAGAGTTAT  | TGCTTCAGAGTTAAAGGTTGA  | 54.74,55.36 | 132 |
| CakTSSR02127 | CakTC28423 | (GAA)5  | 3290 | 3304 | --         | --   | GAATTCTGTAGATGGTGTA    | CTATCATGTCACACTTCTCTCG | 54.29,55.06 | 147 |
| CakTSSR02128 | CakTC28424 | (ATA)5  | 242  | 256  | --         | --   | AAATAAGCCACACAAACTT    | TGGTAGTTGTTGAAGCTAGG   | 54.11,54.84 | 132 |
| CakTSSR02129 | CakTC28424 | (CT)9   | 553  | 570  | --         | --   | CATTATTTGTGCTGAACAAGC  | AGGGAGAGAGAAAATGGTATG  | 56.07,54.99 | 151 |
| CakTSSR02130 | CakTC28430 | (AG)11  | 2416 | 2437 | Young_pod  | bHLH |                        |                        |             |     |
| CakTSSR02131 | CakTC28435 | (TC)14  | 2067 | 2094 | --         | --   | TTGCATAGTCATAAATTCCTCA | GCAAGACACTGTAGCTGAAAT  | 55.11,54.78 | 138 |
| CakTSSR02132 | CakTC28436 | (AG)14  | 276  | 303  | --         | --   | GCAAGACACTGTAGCTGAAAT  | TTGCATAGTCATAAATTCCTCA | 54.78,55.11 | 138 |
| CakTSSR02133 | CakTC28441 | (ATA)5  | 565  | 579  | --         | --   | GAAGGAACATGGTAGCATA    | TGCCTACTCCTTATTATCCAG  | 55.26,53.84 | 162 |
| CakTSSR02134 | CakTC28444 | (TA)12  | 101  | 124  | --         | --   |                        |                        |             |     |
| CakTSSR02135 | CakTC28445 | (TA)11  | 100  | 121  | --         | --   |                        |                        |             |     |
| CakTSSR02136 | CakTC28458 | (GAA)6  | 3867 | 3884 | --         | --   | CCGATCTCGTCTTTATCCTAT  | CGGTTTGAAGAAATTGAGTC   | 55.12,54.92 | 158 |
| CakTSSR02137 | CakTC28459 | (GAA)11 | 1152 | 1184 | --         | --   | GGTGTAGGAACCGAATAACTC  | TTGGGATTCTATTGATGTACG  | 55.34,55.21 | 142 |
| CakTSSR02138 | CakTC28462 | (ATT)5  | 202  | 216  | --         | --   | AAAGAATCCATTCTTGCTCT   | TCCTAAGAAGACAGAGGGAAT  | 54.88,54.71 | 153 |
| CakTSSR02139 | CakTC28462 | (TCC)5  | 412  | 426  | --         | --   | TCCATTGTCTCTAATTGTC    | AAGAGGTGCAATATTGTTGTG  | 55.62,55.34 | 151 |
| CakTSSR02140 | CakTC28468 | (CA)6   | 266  | 277  | Shoot      | --   | TCTAAACCATAACCATTGTC   | CATTGTTAACCTTGGATTGG   | 54.56,54.87 | 133 |
| CakTSSR02141 | CakTC28475 | (CT)6   | 33   | 44   | --         | --   |                        |                        |             |     |
| CakTSSR02142 | CakTC28476 | (TA)6   | 319  | 330  | --         | --   | CTCTCTTCTTCTCTCATTC    | ATTGGTTCTTCTTCTCCAC    | 54.81,55.03 | 153 |

|              |            |         |      |      |            |           |                       |                        |             |     |
|--------------|------------|---------|------|------|------------|-----------|-----------------------|------------------------|-------------|-----|
| CakTSSR02143 | CakTC28476 | (GAA)6  | 1470 | 1487 | --         | --        | TAATGAAAATTGTGGGAGAAG | TGACCTCTTGTCATACTCAT   | 54.5,54.6   | 153 |
| CakTSSR02144 | CakTC28495 | (GT)6   | 3500 | 3511 | --         | --        |                       |                        |             |     |
| CakTSSR02145 | CakTC28509 | (TA)6   | 1471 | 1482 | --         | --        | TATTGTTTGTGTGGGAAGAC  | ACAAATTAGAAGCTGAAAGCA  | 55.15,54.64 | 163 |
| CakTSSR02146 | CakTC28520 | (AG)8   | 1510 | 1525 | --         | Trihelix  |                       |                        |             |     |
| CakTSSR02147 | CakTC28527 | (AG)7   | 1181 | 1194 | --         | --        |                       |                        |             |     |
| CakTSSR02148 | CakTC28528 | (AAT)5  | 275  | 289  | --         | --        | AACATAAGCTCAAATCAACCA | GATAAACAAATTGCAATGTCAC | 54.99,54.85 | 125 |
| CakTSSR02149 | CakTC28528 | (AG)16  | 760  | 791  | --         | --        | TAGTGAGATCTTTGGGAACA  | ATCTTCTCATTTCTCCTTGC   | 54.95,55.26 | 150 |
| CakTSSR02150 | CakTC28548 | (AT)9   | 127  | 144  | --         | --        | CAATGAGTTAAGTCTCTTACA | TGCCTTCATATGCAGAGTAGT  | 54.65,55.17 | 141 |
| CakTSSR02151 | CakTC28557 | (TC)6   | 86   | 97   | --         | --        |                       |                        |             |     |
| CakTSSR02152 | CakTC28560 | (TGT)5  | 8    | 22   | --         | LOB       |                       |                        |             |     |
| CakTSSR02153 | CakTC28561 | (CAA)5  | 48   | 62   | --         | --        |                       |                        |             |     |
| CakTSSR02154 | CakTC28584 | (TAT)6  | 168  | 185  | --         | --        | AAAAGAAGGGGTTTACATCAC | TGGAGCTTATTGAATCTGGTA  | 54.92,55.08 | 152 |
| CakTSSR02155 | CakTC28591 | (CTA)6  | 333  | 350  | --         | --        | TCAATCATGGCTAGTGAGACT | CATCATGTTGTCTCCATCTT   | 54.95,55.05 | 151 |
| CakTSSR02156 | CakTC28599 | (CAG)5  | 143  | 157  | --         | --        | GTTATTGCTGCTTCCTCCTAT | TTTAAGTGGAGGGTTGGTTAT  | 55.34,55.36 | 150 |
| CakTSSR02157 | CakTC28601 | (AGA)8  | 2034 | 2057 | --         | --        |                       |                        |             |     |
| CakTSSR02158 | CakTC28609 | (AAG)7  | 2389 | 2409 | --         | --        | AACCTAATTGAAACAGAAGA  | AAACAACTCTCCTTCTCAC    | 54.85,55.09 | 149 |
| CakTSSR02159 | CakTC28613 | (CAT)5  | 80   | 94   | --         | --        |                       |                        |             |     |
| CakTSSR02160 | CakTC28613 | (GA)6   | 985  | 996  | --         | --        | TAGTCCTGATTGGAAGGAAGT | ACCTTCACCAAAATCTCTACC  | 55.63,54.9  | 154 |
| CakTSSR02161 | CakTC28619 | (CTTC)7 | 56   | 83   | --         | HSF       |                       |                        |             |     |
| CakTSSR02162 | CakTC28652 | (GAA)7  | 493  | 513  | --         | AP2-EREBP | CTCCAATCCAATTTCCATAAT | AATGGAAGTGAAGTAGTGGT   | 55.6,55.25  | 139 |
| CakTSSR02163 | CakTC28682 | (AG)6   | 2032 | 2043 | --         | --        |                       |                        |             |     |
| CakTSSR02164 | CakTC28687 | (CTA)6  | 521  | 538  | --         | WRKY      | GAAATTCAATCTGAACATCCA | TTGTCAACATTACAGAAGAA   | 55.11,54.26 | 146 |
| CakTSSR02165 | CakTC28691 | (TAA)6  | 395  | 412  | --         | --        | TCGTTTAAATAGTCCGTACCA | CTTAAAAACCTTAATCCCAACA | 55.05,55.28 | 156 |
| CakTSSR02166 | CakTC28701 | (CAT)5  | 342  | 356  | --         | --        | TCAATCCTTCTACCAGAATCA | TTGGATAGTCATAGGCTTGAG  | 54.86,54.67 | 155 |
| CakTSSR02167 | CakTC28702 | (CT)6   | 165  | 176  | --         | --        | AGTATATGCACCAACAGTGCT | ATTTGATATTAGGTGCTGTG   | 54.95,55.26 | 142 |
| CakTSSR02168 | CakTC28712 | (GTT)6  | 648  | 665  | --         | --        | GTTGGATGAGATTCTATTCC  | GGTCTCTCAAACTGTTCTTT   | 55.15,54.46 | 152 |
| CakTSSR02169 | CakTC28712 | (AG)8   | 886  | 901  | --         | --        |                       |                        |             |     |
| CakTSSR02170 | CakTC28713 | (ACA)5  | 254  | 268  | --         | bHLH      | TTAGGGGTTTATTTCCTGAAG | GTTCTGGATTAATGTTGTG    | 55.19,54.67 | 158 |
| CakTSSR02171 | CakTC28715 | (AG)8   | 65   | 80   | --         | --        |                       |                        |             |     |
| CakTSSR02172 | CakTC28723 | (AG)10  | 2121 | 2140 | Flower bud | --        |                       |                        |             |     |
| CakTSSR02173 | CakTC28727 | (TGC)5  | 363  | 377  | --         | --        | CCAACAGGTAACAAACCATAG | GTCTGGTAGTGATCCCAAGAT  | 54.8,55.58  | 167 |
| CakTSSR02174 | CakTC28734 | (AAT)5  | 1876 | 1890 | Flower bud | --        | AAAAATACCCTAAGTCGTG   | TCGTGTTGGTAACTTTATTTG  | 55.14,54.74 | 156 |
| CakTSSR02175 | CakTC28746 | (TA)16  | 842  | 873  | --         | --        |                       |                        |             |     |
| CakTSSR02176 | CakTC28747 | (GA)11  | 1653 | 1674 | --         | --        |                       |                        |             |     |
| CakTSSR02177 | CakTC28752 | (CAA)5  | 65   | 79   | --         | --        |                       |                        |             |     |
| CakTSSR02178 | CakTC28759 | (TTG)7  | 733  | 753  | --         | --        | GCCAATCTTCATCTGAGTAAA | AAGAAGAAGAACCTTCACAT   | 54.62,54.62 | 152 |
| CakTSSR02179 | CakTC28765 | (GAT)5  | 1527 | 1541 | --         | --        | AGCAGTGTTGCCTCATATAAA | AATTGATCAACAGATTCATGG  | 55.18,54.98 | 167 |

|              |            |         |      |      |            |          |                       |                        |             |     |
|--------------|------------|---------|------|------|------------|----------|-----------------------|------------------------|-------------|-----|
| CakTSSR02180 | CakTC28775 | (TTC)5  | 362  | 376  | --         | --       | TTCCCTTACCTGTTTCCTCTC | GAACCTCTTGAATTTTCAGCA  | 55.2,54.83  | 151 |
| CakTSSR02181 | CakTC28792 | (CTT)5  | 340  | 354  | --         | --       | CACCCTCTCTATCCCTAGATG | CAATGCCAAACAAAGTAACTC  | 55.44,55.07 | 161 |
| CakTSSR02182 | CakTC28793 | (CTT)5  | 339  | 353  | --         | --       | CACCCTCTCTATCCCTAGATG | CAATGCCAAACAAAGTAACTC  | 55.44,55.07 | 161 |
| CakTSSR02183 | CakTC28797 | (TC)6   | 1275 | 1286 | --         | --       |                       |                        |             |     |
| CakTSSR02184 | CakTC28798 | (CCA)7  | 370  | 390  | --         | C3H      | ATGATGGCTGTTAAATCATTG | CATGGTTACCAGGTTGTCTAC  | 55.19,54.59 | 172 |
| CakTSSR02185 | CakTC28798 | (CTT)5  | 623  | 637  | --         | C3H      | ACAATTGTTGTGTTGGAGAG  | TCATCTAACCTTCTGCTGCTA  | 55.22,55.47 | 150 |
| CakTSSR02186 | CakTC28800 | (TTC)7  | 604  | 624  | Flower bud | --       | TTGATTCATATTTCCATCCAC | CAGAGAAGAATGAGGATGATG  | 54.92,54.84 | 144 |
| CakTSSR02187 | CakTC28811 | (GT)6   | 1300 | 1311 | --         | --       | GAGCATGTGTACAACCTATC  | CCTAAAAAATCATCAGTCCA   | 54.99,55.24 | 155 |
| CakTSSR02188 | CakTC28814 | (AGA)11 | 2055 | 2087 | --         | --       | TTTTAAATCAAGGAAGGTGTG | TAACACGATGCTTCTTCTTC   | 54.59,54.86 | 155 |
| CakTSSR02189 | CakTC28815 | (TC)10  | 9    | 28   | --         | --       |                       |                        |             |     |
| CakTSSR02190 | CakTC28821 | (TTC)5  | 685  | 699  | --         | --       | GCATGTGCAATTTCAACTAAT | ATAAAGCTGCAAGAGGGTATT  | 55.42,54.97 | 157 |
| CakTSSR02191 | CakTC28822 | (TGT)7  | 885  | 905  | --         | --       | GGTTGTTGAAGAAAGTGAAGA | GAAAGAGTTCAAAACCCATCT  | 54.56,55.03 | 156 |
| CakTSSR02192 | CakTC28829 | (GGA)5  | 579  | 593  | --         | --       | GAGTATCGAAGGGAGAAGAAG | TCCCTGATCCCTATCTCTATC  | 54.87,54.83 | 150 |
| CakTSSR02193 | CakTC28831 | (AAG)6  | 99   | 116  | --         | --       |                       |                        |             |     |
| CakTSSR02194 | CakTC28834 | (AAG)6  | 523  | 540  | --         | --       | AGAGCCTCATCAAGAAGAAGA | ATGTGTTCAATGCTGTTTCT   | 55.92,54.88 | 147 |
| CakTSSR02195 | CakTC28846 | (CCT)5  | 494  | 508  | --         | Trihelix | CATCATCTGTTGCCTCTTAGT | ATGAAGATGATGATTTCGATG  | 54.54,55.06 | 167 |
| CakTSSR02196 | CakTC28846 | (TGT)5  | 1256 | 1270 | --         | Trihelix | TTCAATACCGTCTTCATCTTC | AATTCGCACCTTACAATATCA  | 54.45,54.96 | 151 |
| CakTSSR02197 | CakTC28851 | (GTT)6  | 789  | 806  | --         | --       | TGTGAAGATGGAAGAGAAAAG | AATCTCACCCCTCATATTCCTC | 54.65,54.74 | 153 |
| CakTSSR02198 | CakTC28881 | (ATT)5  | 2092 | 2106 | Shoot      | --       |                       |                        |             |     |
| CakTSSR02199 | CakTC28885 | (GTT)8  | 927  | 950  | --         | --       | TGCAACAGGGTTTAACTCTAA | ACATAAGCACTCCACATGAAC  | 55.24,55.16 | 149 |
| CakTSSR02200 | CakTC28885 | (GT)9   | 1290 | 1307 | --         | --       |                       |                        |             |     |
| CakTSSR02201 | CakTC28886 | (AT)7   | 306  | 319  | --         | --       | GGCCCTCCTAATTATTACAAA | GAAGCTCCTGGTATCAACTTT  | 55.15,55.22 | 161 |
| CakTSSR02202 | CakTC28886 | (TTG)6  | 1400 | 1417 | --         | --       | AAAGGAATCTTGGTGATTGTT | TAAGCCATAGCAAAGTGAAGTC | 55.31,54.9  | 154 |
| CakTSSR02203 | CakTC28899 | (TC)10  | 1118 | 1137 | --         | --       |                       |                        |             |     |
| CakTSSR02204 | CakTC28910 | (TAT)5  | 1109 | 1123 | --         | --       |                       |                        |             |     |
| CakTSSR02205 | CakTC28918 | (AG)6   | 2    | 13   | --         | --       |                       |                        |             |     |
| CakTSSR02206 | CakTC28920 | (TAT)6  | 1482 | 1499 | --         | --       | GGAATCAAAAACCTTAACACT | ATGTGGTTTTCTCCCTTAGAA  | 54.92,55.47 | 165 |
| CakTSSR02207 | CakTC28922 | (TCA)5  | 1758 | 1772 | --         | FHA      | CTTTTTCTCTGACGGTCATA  | TTGGAAGAAACACTGAATGAT  | 54.78,54.77 | 150 |
| CakTSSR02208 | CakTC28922 | (GGT)5  | 2676 | 2690 | --         | FHA      |                       |                        |             |     |
| CakTSSR02209 | CakTC28923 | (CCA)5  | 351  | 365  | --         | --       |                       |                        |             |     |
| CakTSSR02210 | CakTC28925 | (CAA)6  | 699  | 716  | --         | --       | TTAATGGCTGATCACAGTTCT | TGGTCAGTTCCAAAAAGAGTA  | 54.97,55.03 | 143 |
| CakTSSR02211 | CakTC28934 | (GAA)7  | 1449 | 1469 | --         | --       |                       |                        |             |     |
| CakTSSR02212 | CakTC28936 | (TC)8   | 44   | 59   | --         | --       |                       |                        |             |     |
| CakTSSR02213 | CakTC28936 | (CAC)5  | 538  | 552  | --         | --       | TGTCCAAATTAAGGATAACCA | TGAGCTAATAAACTGCCTGA   | 54.78,55.48 | 156 |
| CakTSSR02214 | CakTC28946 | (TG)6   | 40   | 51   | --         | --       |                       |                        |             |     |
| CakTSSR02215 | CakTC28946 | (GAA)6  | 488  | 505  | --         | --       | TACATTGGATATCGGTGTGTT | CCACTGCAGCTACTAATATGG  | 55.39,55.23 | 151 |
| CakTSSR02216 | CakTC28972 | (CT)9   | 77   | 94   | --         | --       |                       |                        |             |     |

|              |            |           |      |      |            |           |                        |                       |             |     |
|--------------|------------|-----------|------|------|------------|-----------|------------------------|-----------------------|-------------|-----|
| CakTSSR02217 | CakTC28972 | (AAG)5    | 318  | 332  | --         | --        | ACAGAAAATCTGTCGGTTTCT  | TCATCTTCTTCAACATGATCC | 55.54,55.09 | 149 |
| CakTSSR02218 | CakTC28976 | (TTG)6    | 319  | 336  | --         | WRKY      | TCATCTTTAGGTTTCATCCTTG | CCTTTTAACCTGAGATGATT  | 54.47,55.01 | 155 |
| CakTSSR02219 | CakTC28978 | (GGT)6    | 1644 | 1661 | --         | --        | AAGCAAACCACTCTTGATTTT  | AGAACTCTCCATTACCAAAGG | 55.69,55.07 | 151 |
| CakTSSR02220 | CakTC28997 | (TCC)5    | 454  | 468  | --         | --        | GTTGTCAAACAAGAAAGTTGG  | GTAGAGCTGCAGAAAAGTTCA | 54.94,55.09 | 159 |
| CakTSSR02221 | CakTC28998 | (GAT)5    | 1470 | 1484 | --         | --        | GGAGTCTGTACCACTGAATGA  | TATGTCCACAGTCTCTCCTC  | 55.11,54.29 | 151 |
| CakTSSR02222 | CakTC29000 | (TTC)10   | 171  | 200  | --         | --        | CACCAATTGTAACGAATCAAC  | AGAGGTTGAAAAATGGAAGAG | 55.6,55.2   | 149 |
| CakTSSR02223 | CakTC29009 | (AGA)5    | 19   | 33   | Flower bud | GNAT      |                        |                       |             |     |
| CakTSSR02224 | CakTC29010 | (TC)7     | 39   | 52   | --         | --        |                        |                       |             |     |
| CakTSSR02225 | CakTC29020 | (CTT)5    | 710  | 724  | --         | AP2-EREBP | AGTTCTTCCACAAATCAACC   | CCAAGAACAGAACAGAAGAA  | 55.78,54.74 | 152 |
| CakTSSR02226 | CakTC29020 | (TAT)5    | 1884 | 1898 | --         | AP2-EREBP |                        |                       |             |     |
| CakTSSR02227 | CakTC29031 | (TCA)5    | 524  | 538  | --         | --        | CTTTAACCGATCAACAATGAA  | TTAGAGGCACAAAGGTTATGA | 55.41,55.16 | 143 |
| CakTSSR02228 | CakTC29035 | (TCT)6    | 988  | 1005 | --         | --        | GTTTCAACTTCTTCGTTTCA   | AGTCGTTAGGTGACTCAGTTG | 54.75,54.52 | 145 |
| CakTSSR02229 | CakTC29036 | (CT)9     | 1    | 18   | --         | --        |                        |                       |             |     |
| CakTSSR02230 | CakTC29039 | (CAA)5    | 2132 | 2146 | --         | --        | GTACACCTCAAGTTTCTGACG  | GCGATCTCTTTCTCTCTCTT  | 54.95,54.73 | 169 |
| CakTSSR02231 | CakTC29047 | (GAT)5    | 145  | 159  | --         | --        | CTAGTGCCTTTGAAAGTGTG   | CATTTCACAATCAGGTAAAG  | 55.31,54.84 | 147 |
| CakTSSR02232 | CakTC29049 | (GGT)7    | 1521 | 1541 | --         | TCP       | TACATTTTATGCCGAGGTTTA  | CAAAATTTGAATCAGAACTGC | 55.15,55.12 | 149 |
| CakTSSR02233 | CakTC29049 | (TCTCAT)5 | 1776 | 1805 | --         | TCP       | GGTGCTACTGATTTCATGTT   | TTCACCTTCAGTAGGTTGAGG | 54.4,54.61  | 150 |
| CakTSSR02234 | CakTC29049 | (AG)10    | 2115 | 2134 | --         | TCP       |                        |                       |             |     |
| CakTSSR02235 | CakTC29070 | (GAA)14   | 1221 | 1262 | --         | --        | GGTTCTTGACCTGGCTTAAT   | CTGAACTTGAGTTTCAAAAGG | 55.11,54.35 | 154 |
| CakTSSR02236 | CakTC29077 | (CAG)5    | 531  | 545  | --         | --        | CTCAAACCTCAGAGAGAACCT  | AGGACATACCTCCAAATCAAT | 55.25,55.11 | 145 |
| CakTSSR02237 | CakTC29096 | (CTT)7    | 1172 | 1192 | --         | --        | TGAAACCAAACTCTGAGTCAT  | ATGATGACGATCAAGATCAAG | 54.83,55.13 | 129 |
| CakTSSR02238 | CakTC29099 | (CAT)11   | 537  | 569  | --         | WRKY      | GGAAGAGAACATGAAGTGGA   | TACATGTGATGATGTTGATGG | 55.25,55.09 | 157 |
| CakTSSR02239 | CakTC29099 | (AAC)6    | 1301 | 1318 | --         | WRKY      | ATATTTCACCAATTCACCTTT  | GACAAGCTGAAAATGTTTGAC | 55.12,55.01 | 158 |
| CakTSSR02240 | CakTC29117 | (TCC)5    | 548  | 562  | --         | --        | AACACCTTGGCTACAAACATA  | AGAAACCAGTAGCACCAAAA  | 54.95,55.04 | 146 |
| CakTSSR02241 | CakTC29130 | (CT)6     | 12   | 23   | Flower bud | --        |                        |                       |             |     |
| CakTSSR02242 | CakTC29130 | (TA)7     | 795  | 808  | Flower bud | --        |                        |                       |             |     |
| CakTSSR02243 | CakTC29131 | (TA)6     | 165  | 176  | --         | --        | TTTCTACCTTCTGCTTCTCA   | TCAATGATCCATAAGTGTTC  | 54.59,54.98 | 149 |
| CakTSSR02244 | CakTC29135 | (TG)9     | 2541 | 2558 | --         | --        |                        |                       |             |     |
| CakTSSR02245 | CakTC29136 | (TTTC)5   | 171  | 190  | --         | --        | CCATATACAGCTGATTCGTT   | AACGAGTCAACTCAACTGAAC | 54.56,54.46 | 156 |
| CakTSSR02246 | CakTC29146 | (TAGA)5   | 2424 | 2443 | --         | --        |                        |                       |             |     |
| CakTSSR02247 | CakTC29149 | (GA)8     | 1148 | 1163 | --         | --        |                        |                       |             |     |
| CakTSSR02248 | CakTC29155 | (TGA)9    | 237  | 263  | --         | --        | AACCTTCAAAACCTCAACTTC  | TAAGGATTTAGAGCAGCAATG | 55.11,55.01 | 152 |
| CakTSSR02249 | CakTC29156 | (TGA)9    | 269  | 295  | --         | --        | AACCTTCAAAACCTCAACTTC  | TAAGGATTTAGAGCAGCAATG | 55.11,55.01 | 152 |
| CakTSSR02250 | CakTC29164 | (TA)8     | 313  | 328  | --         | --        | TTTCTTCTTCTTCCCAAGT    | CATCTCTTCCATCATATICA  | 54.92,55.07 | 150 |
| CakTSSR02251 | CakTC29169 | (ACA)8    | 190  | 213  | --         | --        | GTCGTTTCACAAGAACAACAT  | TGATGAAATGCTTCTGAGAGT | 55.2,55.08  | 143 |
| CakTSSR02252 | CakTC29172 | (ATC)6    | 839  | 856  | --         | --        |                        |                       |             |     |
| CakTSSR02253 | CakTC29175 | (CT)6     | 121  | 132  | --         | --        | ACGGAAGGATCTCTAGAATTG  | TGGTGATTGAATTTCTCAAG  | 55.15,55.37 | 158 |

|              |            |           |      |      |       |          |                       |                        |             |     |
|--------------|------------|-----------|------|------|-------|----------|-----------------------|------------------------|-------------|-----|
| CakTSSR02254 | CakTC29183 | (GAA)6    | 48   | 65   | --    | --       |                       |                        |             |     |
| CakTSSR02255 | CakTC29184 | (CAT)5    | 1685 | 1699 | --    | --       |                       |                        |             |     |
| CakTSSR02256 | CakTC29197 | (CTT)7    | 108  | 128  | --    | mTERF    | CCCTTCTCCTTCTCGTTAATA | GAAAAGGAGATAAGGTTGAGG  | 55.33,54.74 | 149 |
| CakTSSR02257 | CakTC29224 | (CT)8     | 261  | 276  | --    | --       | TTCTCTCTCCTTGATTGTCA  | GATTCGGAATTTGAAATAGG   | 55.06,55.48 | 179 |
| CakTSSR02258 | CakTC29228 | (AG)19    | 1248 | 1285 | --    | --       | GTACTGCTCCATCAAAACCT  | TTCTTCTTCTCCTCTTCGAT   | 55.97,54.99 | 152 |
| CakTSSR02259 | CakTC29248 | (GA)7     | 1976 | 1989 | --    | --       |                       |                        |             |     |
| CakTSSR02260 | CakTC29252 | (ATT)5    | 533  | 547  | --    | --       | TCAAATTAGGACCTCTCACAA | GCCTTCAAGTTAGAATGGTTT  | 54.95,55.23 | 153 |
| CakTSSR02261 | CakTC29252 | (TAT)7    | 859  | 879  | --    | --       | GCTGACCTTAAATCAATAGCA | AATGGTTAGTCCAATGAATGA  | 54.84,54.58 | 150 |
| CakTSSR02262 | CakTC29255 | (CT)12    | 239  | 262  | --    | --       | AGACAACCAAAACCTAAATC  | TAATACTCCAGCCATCAAGG   | 54.92,55.35 | 150 |
| CakTSSR02263 | CakTC29263 | (TC)14    | 1428 | 1455 | --    | C2C2-Dof | ACCACAAGATGAGTCTTCAAA | TAGAAGTGGGTGTGTGTTTT   | 54.83,54.81 | 142 |
| CakTSSR02264 | CakTC29266 | (CAT)5    | 923  | 937  | --    | --       | TCTGAAAAATCCAACCACTTA | TGATAAGGATAGAGTGGAGAGG | 54.97,55.17 | 152 |
| CakTSSR02265 | CakTC29278 | (CAG)5    | 970  | 984  | --    | --       | ATGTTGGTCTGAAAGGGTTA  | GCTTCTGATTAACACCAACAC  | 56.23,54.88 | 150 |
| CakTSSR02266 | CakTC29300 | (AAC)5    | 928  | 942  | --    | --       | AGATTATCGTTCCACTTCA   | ATCCTTCACTCAGTCCAATTT  | 54.8,55.3   | 152 |
| CakTSSR02267 | CakTC29304 | (GA)6     | 2065 | 2076 | --    | --       |                       |                        |             |     |
| CakTSSR02268 | CakTC29310 | (CA)6     | 65   | 76   | --    | --       |                       |                        |             |     |
| CakTSSR02269 | CakTC29320 | (GTG)5    | 1439 | 1453 | --    | bHLH     | TCTCTTCGTCTTTGTGTGT   | GATATCATTTCCCCATGAAA   | 54.34,54.82 | 150 |
| CakTSSR02270 | CakTC29328 | (AG)6     | 14   | 25   | --    | --       |                       |                        |             |     |
| CakTSSR02271 | CakTC29330 | (TC)6     | 125  | 136  | --    | --       | CCCTTTCTTTATTTCAACATT | CTAACCTTGATGTTGATTGGA  | 55.03,55.24 | 153 |
| CakTSSR02272 | CakTC29352 | (AG)10    | 2362 | 2381 | --    | --       |                       |                        |             |     |
| CakTSSR02273 | CakTC29355 | (AGG)5    | 1400 | 1414 | --    | --       |                       |                        |             |     |
| CakTSSR02274 | CakTC29357 | (CGC)5    | 213  | 227  | --    | --       | GACCTCTGTCAACAGCTCAT  | GAGTCTAGGGACTCAGACGAC  | 55.25,55.53 | 179 |
| CakTSSR02275 | CakTC29377 | (TCA)5    | 505  | 519  | --    | MYB      | CTGAAGAAATTGCAACAGAT  | TGAAAGTGCTTCACTAAGAGC  | 54.7,55.09  | 156 |
| CakTSSR02276 | CakTC29378 | (CAAAAC)5 | 109  | 138  | --    | --       | ATGAGGACCAAAATAAAACC  | AGAACTAGGGAGGAGATGTTG  | 54.87,55.06 | 164 |
| CakTSSR02277 | CakTC29387 | (CCA)5    | 1    | 15   | --    | --       |                       |                        |             |     |
| CakTSSR02278 | CakTC29405 | (TCT)5    | 275  | 289  | --    | --       | TGCCATAAAGTCTCTTCAAAA | TCTCAAAGATTCTCTGATTG   | 55.29,54.56 | 154 |
| CakTSSR02279 | CakTC29415 | (ATC)5    | 619  | 633  | Shoot | --       | TTTTCTCTTTGTGTGTTAG   | GAATCGGTAAATCAAAACCT   | 54.67,55.02 | 149 |
| CakTSSR02280 | CakTC29415 | (AAC)8    | 921  | 944  | Shoot | --       | AACACAAACGAAGATGAAGAA | GTTATAACGATGGGTGTTTT   | 55.02,55.62 | 146 |
| CakTSSR02281 | CakTC29415 | (GCA)5    | 1512 | 1526 | Shoot | --       | GAAGATGAACAAGGTGATGAA | ACCTGATGTTGTAAATGTTGC  | 55.18,55.17 | 149 |
| CakTSSR02282 | CakTC29415 | (CCT)5    | 1674 | 1688 | Shoot | --       |                       |                        |             |     |
| CakTSSR02283 | CakTC29416 | (TC)13    | 31   | 56   | --    | --       |                       |                        |             |     |
| CakTSSR02284 | CakTC29417 | (TTC)5    | 311  | 325  | --    | --       | CAATGCCAAATACCATAAAAG | GGTTGACATGTGATCTGAAAT  | 54.99,54.86 | 132 |
| CakTSSR02285 | CakTC29417 | (GA)7     | 1400 | 1413 | --    | --       |                       |                        |             |     |
| CakTSSR02286 | CakTC29420 | (GA)7     | 101  | 114  | --    | --       | TGACTTAAACCTTCCCTTCTT | CAAAAACACACTTGTTCACA   | 54.82,54.76 | 143 |
| CakTSSR02287 | CakTC29427 | (TTCACA)7 | 67   | 108  | --    | --       |                       |                        |             |     |
| CakTSSR02288 | CakTC29436 | (CT)9     | 1210 | 1227 | --    | --       |                       |                        |             |     |
| CakTSSR02289 | CakTC29439 | (AG)6     | 273  | 284  | --    | --       | TATTTGATGACCCATGTTGAT | AATCTCCACGAACCTCTTCTTC | 55.28,55.17 | 155 |
| CakTSSR02290 | CakTC29446 | (AAC)5    | 53   | 67   | --    | --       |                       |                        |             |     |

|              |            |           |      |      |       |          |                        |                       |             |     |
|--------------|------------|-----------|------|------|-------|----------|------------------------|-----------------------|-------------|-----|
| CakTSSR02291 | CakTC29460 | (CT)6     | 2    | 13   | --    | --       |                        |                       |             |     |
| CakTSSR02292 | CakTC29464 | (ACA)5    | 230  | 244  | --    | --       | AGAATCTCTTCATCAGCAACA  | GTGGAGTTTGGAGATCTCTTT | 55.08,55.01 | 176 |
| CakTSSR02293 | CakTC29465 | (TA)6     | 263  | 274  | Shoot | --       | ATTTTCCCTTTAGACAAACC   | TTGAGGTTGAACACAACAAGT | 54.24,55.72 | 147 |
| CakTSSR02294 | CakTC29468 | (AAG)8    | 39   | 62   | --    | --       |                        |                       |             |     |
| CakTSSR02295 | CakTC29469 | (TC)6     | 40   | 51   | --    | --       |                        |                       |             |     |
| CakTSSR02296 | CakTC29475 | (TC)14    | 1509 | 1536 | --    | --       | TGTGAGATTTGGTTTCGTAAT  | AAGAACCAGCACTAGTGACAA | 54.83,55.12 | 147 |
| CakTSSR02297 | CakTC29481 | (CCT)5    | 155  | 169  | --    | --       | AATTCGTTTCCCTCTTTATTG  | TCAGAAGACATTCGACCTTTA | 55.18,55.11 | 153 |
| CakTSSR02298 | CakTC29482 | (GTT)6    | 36   | 53   | --    | --       |                        |                       |             |     |
| CakTSSR02299 | CakTC29484 | (TGG)5    | 261  | 275  | --    | --       | ATGGGAGACCCATCTAGTAAA  | ACAACAACAACCTTTCATGTC | 55.27,55.04 | 157 |
| CakTSSR02300 | CakTC29487 | (ACT)5    | 622  | 636  | --    | mTERF    | GTTCCCTACAAAATCAAGGAT  | AGAGATGTTGCAGGTTAGTGA | 54.84,55.04 | 150 |
| CakTSSR02301 | CakTC29492 | (ATT)6    | 2569 | 2586 | --    | --       | ATAGATAGCTGGAGAATGCAA  | AAAGATCAGGACTCCCTTTC  | 54.35,54.91 | 154 |
| CakTSSR02302 | CakTC29497 | (ACA)6    | 1012 | 1029 | --    | MYB      | ACATTGATGAATGGGTAGAAA  | TTAGATGAATTGGATGGTTCT | 54.58,53.82 | 151 |
| CakTSSR02303 | CakTC29498 | (GATTTG)5 | 275  | 304  | --    | NAC      | GCATCAGCAAAGTAGACAAAT  | TCTCCAAAATTCAGCAGTTAG | 54.73,54.88 | 152 |
| CakTSSR02304 | CakTC29498 | (TCC)6    | 496  | 513  | --    | NAC      | GGGAGAGGGAGTAACAAAGTA  | TGACAACAGTTCTTGGTCTTT | 55.07,54.92 | 148 |
| CakTSSR02305 | CakTC29498 | (ATC)6    | 1248 | 1265 | --    | NAC      | TTCTTCTTCAGTTGGATGAAA  | ATGAGTCAAAGCCATAGTCAC | 55.08,54.36 | 153 |
| CakTSSR02306 | CakTC29499 | (TA)7     | 72   | 85   | --    | --       |                        |                       |             |     |
| CakTSSR02307 | CakTC29500 | (TCT)5    | 255  | 269  | --    | --       | GTCTCATCTTTGGTCCTTCTT  | TTGTTGTTGTTGAGAATGTTG | 55.01,54.67 | 158 |
| CakTSSR02308 | CakTC29514 | (TC)11    | 68   | 89   | --    | --       |                        |                       |             |     |
| CakTSSR02309 | CakTC29528 | (AC)6     | 75   | 86   | --    | --       |                        |                       |             |     |
| CakTSSR02310 | CakTC29534 | (GCC)5    | 1377 | 1391 | --    | --       |                        |                       |             |     |
| CakTSSR02311 | CakTC29541 | (AT)6     | 3067 | 3078 | --    | --       | TGAAATGATATCCTTCCGAAT  | CAGTCTCTACTGGGGGTTATT | 56.15,54.95 | 140 |
| CakTSSR02312 | CakTC29549 | (TTA)5    | 1262 | 1276 | --    | Trihelix |                        |                       |             |     |
| CakTSSR02313 | CakTC29553 | (AG)16    | 1359 | 1390 | --    | --       |                        |                       |             |     |
| CakTSSR02314 | CakTC29554 | (GAA)5    | 2339 | 2353 | --    | --       | AAATCAACAGAGACATTGGAA  | AAAGTCGAAGTTGCTCTCTCT | 54.77,55.16 | 146 |
| CakTSSR02315 | CakTC29557 | (ATT)9    | 169  | 195  | --    | --       | TGCTACCTGTTGTTTCTCCTA  | ATGTATGGCAAGGAAAGTATG | 55.23,54.4  | 165 |
| CakTSSR02316 | CakTC29572 | (AG)9     | 876  | 893  | --    | --       |                        |                       |             |     |
| CakTSSR02317 | CakTC29573 | (AG)6     | 57   | 68   | --    | --       |                        |                       |             |     |
| CakTSSR02318 | CakTC29574 | (TGT)5    | 1125 | 1139 | --    | --       | TCAGTAGAAAAACATGGGGATA | CATCAAATGCATTCTCTCATT | 54.76,55.31 | 151 |
| CakTSSR02319 | CakTC29574 | (AAT)7    | 1260 | 1280 | --    | --       |                        |                       |             |     |
| CakTSSR02320 | CakTC29576 | (TC)13    | 1    | 26   | Shoot | --       |                        |                       |             |     |
| CakTSSR02321 | CakTC29580 | (CT)18    | 1    | 36   | --    | --       |                        |                       |             |     |
| CakTSSR02322 | CakTC29586 | (CAA)5    | 63   | 77   | --    | --       |                        |                       |             |     |
| CakTSSR02323 | CakTC29591 | (AT)8     | 947  | 962  | --    | --       | TCACTCTTCGGGATCTCTAGT  | CAATTACTCCATCCAAATTCA | 55.63,55.17 | 173 |
| CakTSSR02324 | CakTC29598 | (AGA)5    | 1329 | 1343 | --    | --       |                        |                       |             |     |
| CakTSSR02325 | CakTC29600 | (TCT)6    | 123  | 140  | --    | --       | TCTTCCCTTCTCTCATTTAC   | GGTGTGATTGGGATCTAAAA  | 55.12,54.97 | 152 |
| CakTSSR02326 | CakTC29601 | (AGA)5    | 1460 | 1474 | --    | --       |                        |                       |             |     |
| CakTSSR02327 | CakTC29608 | (AAC)5    | 180  | 194  | --    | --       | ACATCAGTGAGATGTCAACCT  | GCTCAAAATTATCGTTAGCAG | 54.47,54.62 | 148 |

|              |            |        |      |      |            |              |                        |                       |             |     |
|--------------|------------|--------|------|------|------------|--------------|------------------------|-----------------------|-------------|-----|
| CakTSSR02328 | CakTC29615 | (AG)10 | 2269 | 2288 | --         | --           | TCTTGCATTGTTTCGAGTATTT | TCTGTGGAACACTCTTTTCAT | 55.15,54.83 | 165 |
| CakTSSR02329 | CakTC29620 | (TC)8  | 7    | 22   | --         | --           |                        |                       |             |     |
| CakTSSR02330 | CakTC29654 | (GA)7  | 64   | 77   | --         | --           |                        |                       |             |     |
| CakTSSR02331 | CakTC29655 | (GTT)7 | 582  | 602  | --         | --           | TGTTTCAGGAGGATCATGTTT  | ATCAAAACCAACAACAATCTC | 55.46,54.19 | 150 |
| CakTSSR02332 | CakTC29662 | (TTG)5 | 812  | 826  | --         | --           | ATTTCCTCACTTTTGTCTAACC | TATTAAGGTGTTGCAAGTGG  | 54.92,55.52 | 154 |
| CakTSSR02333 | CakTC29667 | (TTC)5 | 404  | 418  | --         | --           | ACCAATAAGGATCAGGCTTAG  | AAGATGGTGTGATTGTGTG   | 55.2,55.15  | 148 |
| CakTSSR02334 | CakTC29684 | (CT)6  | 105  | 116  | --         | --           | GTAAGTGACACTGCTCAACC   | CGAAACTTAGACTTTGGAGGT | 54.94,55.31 | 144 |
| CakTSSR02335 | CakTC29689 | (AG)12 | 540  | 563  | --         | --           |                        |                       |             |     |
| CakTSSR02336 | CakTC29692 | (GTG)9 | 493  | 519  | --         | --           | AGAACATGGCATAGGATACG   | ATCTCCTCCTGCACCACTA   | 55.2,55.66  | 148 |
| CakTSSR02337 | CakTC29708 | (TTC)6 | 240  | 257  | --         | --           | GTAGTTGTTGGGGTATGTCTT  | GGCTTTCTGTTTATGGAAGTT | 55.54,55.23 | 152 |
| CakTSSR02338 | CakTC29714 | (AT)10 | 826  | 845  | --         | --           | AAATGGAAGTTTAGGGTGATG  | TCAAATTGGAGACCTCATAGA | 55.75,54.86 | 180 |
| CakTSSR02339 | CakTC29725 | (TAC)6 | 1021 | 1038 | --         | --           | GGAAAGGAAGGTTGAGAAGTA  | CAGCACAAATTCATCTCTCT  | 55.2,55.38  | 165 |
| CakTSSR02340 | CakTC29738 | (TCA)5 | 121  | 135  | --         | --           | GGTCTCTAAGACATTGGGTTT  | AGCTAAGGAGAAATCACGAGT | 54.9,54.97  | 155 |
| CakTSSR02341 | CakTC29740 | (CT)10 | 78   | 97   | --         | SWI/SNF-SWI3 |                        |                       |             |     |
| CakTSSR02342 | CakTC29776 | (ATA)5 | 1071 | 1085 | --         | ARF          | TCATGTTTGTTAACCATAGGAA | TCTTGAGATTGTGTCTCAGT  | 54.88,55.17 | 150 |
| CakTSSR02343 | CakTC29780 | (AG)7  | 920  | 933  | --         | --           |                        |                       |             |     |
| CakTSSR02344 | CakTC29781 | (CT)10 | 1    | 20   | --         | --           |                        |                       |             |     |
| CakTSSR02345 | CakTC29782 | (CT)6  | 73   | 84   | --         | --           |                        |                       |             |     |
| CakTSSR02346 | CakTC29801 | (AGA)6 | 1898 | 1915 | --         | --           |                        |                       |             |     |
| CakTSSR02347 | CakTC29805 | (AT)9  | 61   | 78   | Shoot      | zf-HD        |                        |                       |             |     |
| CakTSSR02348 | CakTC29808 | (TA)6  | 1890 | 1901 | --         | --           |                        |                       |             |     |
| CakTSSR02349 | CakTC29811 | (AGA)5 | 63   | 77   | --         | --           |                        |                       |             |     |
| CakTSSR02350 | CakTC29831 | (AG)8  | 105  | 120  | --         | --           | GCTGTCACAAGTAAATCCAA   | GTTTGCTTCATCATCGTTTAC | 55.47,54.98 | 153 |
| CakTSSR02351 | CakTC29831 | (TCT)6 | 1939 | 1956 | --         | --           | TGTCTAACTCCACTGCAACTT  | CATTGGCATCAACTACAAAAT | 55.12,55.27 | 151 |
| CakTSSR02352 | CakTC29834 | (CTT)5 | 230  | 244  | --         | --           | TGGCACTCAGCTCACTACTAC  | AAATAGCCTCATTCCAAGTC  | 55.75,55.15 | 156 |
| CakTSSR02353 | CakTC29843 | (GCA)7 | 1638 | 1658 | --         | Sigma70-like | ATGAGGTGCTTTAAAGTGTG   | CTTCAAACCAAAACAAGACAC | 54.66,54.94 | 169 |
| CakTSSR02354 | CakTC29846 | (AG)6  | 5172 | 5183 | --         | --           |                        |                       |             |     |
| CakTSSR02355 | CakTC29849 | (GA)7  | 2659 | 2672 | --         | --           |                        |                       |             |     |
| CakTSSR02356 | CakTC29856 | (TCA)5 | 2384 | 2398 | --         | --           | TTACTTCTGCAAAGAGGACAC  | GGCTATGATGTTGATGTTGAT | 54.76,55    | 154 |
| CakTSSR02357 | CakTC29877 | (GAA)7 | 1698 | 1718 | --         | --           | AGTGGTACAAACATGAACAGG  | CATTGGATGAAAGGACAGTTA | 55.08,55.24 | 159 |
| CakTSSR02358 | CakTC29882 | (CTT)5 | 419  | 433  | --         | --           | AATGCTTTCTTTATTGCCTCT  | CCTTGGAATTGTTGAAGAGTA | 55.08,54.55 | 145 |
| CakTSSR02359 | CakTC29884 | (GAA)5 | 47   | 61   | --         | --           |                        |                       |             |     |
| CakTSSR02360 | CakTC29888 | (TA)10 | 153  | 172  | --         | --           | AAATCAAAGGAGGATTTCAAG  | GAATTGTTCAATCCAGACCTT | 55.13,55.71 | 142 |
| CakTSSR02361 | CakTC29890 | (AGA)7 | 3046 | 3066 | --         | --           | CTAGAAAAACCCACCTTGATT  | ATTCTAATTCTGCATCAACCA | 55.09,54.91 | 166 |
| CakTSSR02362 | CakTC29891 | (ATA)6 | 335  | 352  | Flower bud | --           | CTTCACATCTGTTTTCAAGG   | AATTTCAGCCAGTTTCTCACT | 55.03,55.69 | 149 |
| CakTSSR02363 | CakTC29895 | (TCT)7 | 113  | 133  | --         | --           | GCTACGCTTTTAAATCCTTTT  | CCAAAGTAATCGAAGATTGAA | 54.89,54.66 | 132 |
| CakTSSR02364 | CakTC29896 | (TC)8  | 122  | 137  | --         | --           | GCTTTTGATAGCTACCTTCTT  | AAAATGTGATCGGTTTCTGA  | 54.7,54.83  | 153 |

|              |            |           |      |      |            |         |                       |                       |             |     |
|--------------|------------|-----------|------|------|------------|---------|-----------------------|-----------------------|-------------|-----|
| CakTSSR02365 | CakTC29899 | (AGA)5    | 4026 | 4040 | --         | --      |                       |                       |             |     |
| CakTSSR02366 | CakTC29900 | (TGAATC)6 | 2845 | 2880 | Flower bud | SNF2    | TGCGTTTTCTTTAGTGCTTA  | TGCAACTAGAGAAAGCTATGG | 55.7,55.07  | 156 |
| CakTSSR02367 | CakTC29906 | (TA)7     | 3996 | 4009 | --         | --      |                       |                       |             |     |
| CakTSSR02368 | CakTC29912 | (AAGA)6   | 53   | 76   | --         | --      |                       |                       |             |     |
| CakTSSR02369 | CakTC29917 | (AAAT)5   | 3803 | 3822 | --         | --      |                       |                       |             |     |
| CakTSSR02370 | CakTC29919 | (TAT)5    | 161  | 175  | --         | --      | TGCGCACTATCATTTTAATC  | AGATTTCACGTACAGCTATC  | 55.67,54.76 | 152 |
| CakTSSR02371 | CakTC29931 | (CCA)6    | 2085 | 2102 | --         | --      | GCTGTTTTACAATTGGACAT  | CCAATTTCCATCTACAAGTGA | 54.43,55.24 | 147 |
| CakTSSR02372 | CakTC29931 | (GA)10    | 2707 | 2726 | --         | --      | CGTTAATTTATGATGGATTGC | CACCGATAAACACTCTCAAAA | 54.9,55.48  | 152 |
| CakTSSR02373 | CakTC29932 | (AG)7     | 75   | 88   | --         | --      |                       |                       |             |     |
| CakTSSR02374 | CakTC29942 | (TTG)6    | 2131 | 2148 | --         | --      | TAATGGACTTGGACTGAAAAA | TTGAAACCTCACAAAGAGAAA | 54.97,55.16 | 158 |
| CakTSSR02375 | CakTC29945 | (GCG)5    | 168  | 182  | --         | --      | ACTTCGGGTAACGTGATTACT | TTCTCGTGTGTTTTCAAAGT  | 55.45,55.1  | 160 |
| CakTSSR02376 | CakTC29959 | (CT)8     | 137  | 152  | --         | --      | TCATATCCACTCTCACTCACC | AGAAAGGGGAAGAGTTATGTG | 55.03,55.07 | 146 |
| CakTSSR02377 | CakTC29960 | (GAAA)5   | 29   | 48   | --         | --      |                       |                       |             |     |
| CakTSSR02378 | CakTC29961 | (AAT)8    | 347  | 370  | --         | C3H     | GCAACTAGAAGACGCTGATAA | TGATGATTATTCGTTTCCTC  | 55.06,54.4  | 152 |
| CakTSSR02379 | CakTC29962 | (TC)15    | 45   | 74   | --         | --      |                       |                       |             |     |
| CakTSSR02380 | CakTC29964 | (AT)10    | 3386 | 3405 | --         | --      | CTAGTTTGTGACACATCCTC  | TTGATTGTATAGGTGCTGTGA | 54.87,54.29 | 152 |
| CakTSSR02381 | CakTC29965 | (TC)20    | 22   | 61   | --         | HB      |                       |                       |             |     |
| CakTSSR02382 | CakTC29965 | (GAA)6    | 1441 | 1458 | --         | HB      | AGTAATGATGCAATGAAGACG | GCATCAATTAAGTTTTGTTCG | 55.43,55.16 | 149 |
| CakTSSR02383 | CakTC29969 | (TTC)8    | 220  | 243  | --         | --      | ACACCTCTACGATTCTCATCA | ACAGAGCTATCTTCGATGTCA | 54.78,55.12 | 135 |
| CakTSSR02384 | CakTC29974 | (GA)8     | 5039 | 5054 | --         | --      |                       |                       |             |     |
| CakTSSR02385 | CakTC29979 | (AG)8     | 18   | 33   | --         | --      |                       |                       |             |     |
| CakTSSR02386 | CakTC29981 | (CT)6     | 374  | 385  | --         | --      | AGAAGCCAATTCCTCTTCTAA | AGAAAGAGGTTCTTGCAAAGT | 55.04,55.02 | 158 |
| CakTSSR02387 | CakTC29981 | (AGA)8    | 2245 | 2268 | --         | --      | CCCATAAAGAGAAAAGCTCTC | GCATTACCCATTCTCTTACC  | 54.74,54.78 | 147 |
| CakTSSR02388 | CakTC29983 | (TGA)5    | 293  | 307  | --         | --      | ACAGTGGTAGCTTTTCAGATG | TCGTTGCTTCTAATGTCTTTT | 54.63,54.48 | 156 |
| CakTSSR02389 | CakTC29989 | (GAA)6    | 974  | 991  | --         | GRAS    | TGAAGGGTAGAAAGAATCACA | TTCCACATTAAGCAACACTTT | 54.95,55.07 | 149 |
| CakTSSR02390 | CakTC29998 | (CA)6     | 48   | 59   | --         | --      |                       |                       |             |     |
| CakTSSR02391 | CakTC29998 | (TTA)5    | 2759 | 2773 | --         | --      |                       |                       |             |     |
| CakTSSR02392 | CakTC30006 | (AG)8     | 3196 | 3211 | --         | --      |                       |                       |             |     |
| CakTSSR02393 | CakTC30018 | (TA)6     | 2019 | 2030 | --         | --      | TGCGATCCATAAATATTCTTC | TACCACCGTCTATTACCTACG | 54.55,54.53 | 156 |
| CakTSSR02394 | CakTC30021 | (TCT)5    | 1341 | 1355 | --         | --      | TGGCTACATTTTCATGTTCTT | GCCATTGTTGTAGGAGACTTA | 54.99,54.58 | 151 |
| CakTSSR02395 | CakTC30021 | (TTG)6    | 1507 | 1524 | --         | --      | CCAGCTAAGTCTCCTACAACA | AATTTCACCAACACTTCTTCA | 54.81,54.85 | 147 |
| CakTSSR02396 | CakTC30029 | (TA)10    | 55   | 74   | Root       | --      |                       |                       |             |     |
| CakTSSR02397 | CakTC30030 | (AAT)5    | 17   | 31   | --         | AUX/IAA |                       |                       |             |     |
| CakTSSR02398 | CakTC30031 | (GA)7     | 290  | 303  | Flower bud | --      | ACTCAGAAGCTGATTGATTGA | GAACAGAGAATAAAGCCACAG | 55.08,54.28 | 140 |
| CakTSSR02399 | CakTC30033 | (AG)10    | 1096 | 1115 | --         | --      | CTGTTTCTCCATTTTCTTCA  | AAAAGCAACTCCCTTTTACT  | 54.68,54.24 | 146 |
| CakTSSR02400 | CakTC30038 | (AG)10    | 118  | 137  | --         | --      | CCCTTCTTTTATTTTCTCAA  | TGGTAGTGATTGGTTTTTGT  | 55.3,54.75  | 153 |
| CakTSSR02401 | CakTC30039 | (TTC)7    | 892  | 912  | --         | bHLH    | AGTGATTCTCTGTGCTCTGC  | AGAATAGAAAACGGCAATGTT | 54.51,55.65 | 155 |

|              |            |            |      |      |            |          |                        |                        |             |     |
|--------------|------------|------------|------|------|------------|----------|------------------------|------------------------|-------------|-----|
| CakTSSR02402 | CakTC30043 | (AAG)5     | 1833 | 1847 | --         | --       |                        |                        |             |     |
| CakTSSR02403 | CakTC30060 | (TCT)6     | 1260 | 1277 | Root       | --       |                        |                        |             |     |
| CakTSSR02404 | CakTC30063 | (TC)7      | 97   | 110  | --         | --       |                        |                        |             |     |
| CakTSSR02405 | CakTC30069 | (ATA)5     | 60   | 74   | --         | bHLH     |                        |                        |             |     |
| CakTSSR02406 | CakTC30071 | (AAG)5     | 70   | 84   | --         | --       |                        |                        |             |     |
| CakTSSR02407 | CakTC30074 | (TG)6      | 1025 | 1036 | --         | --       | TTTTGTTAGGGTTTGTGATG   | TCACTTTCATCTCAAGTACCG  | 55.33,55.48 | 160 |
| CakTSSR02408 | CakTC30076 | (TTG)6     | 358  | 375  | --         | --       | GTGGATAAAGTGAGTGTTGGA  | TCATCAAGAACAAGTCCAAGT  | 55.13,54.83 | 157 |
| CakTSSR02409 | CakTC30080 | (CT)12     | 124  | 147  | --         | --       | TCACTAGCCCCATAAATCTCT  | GCTGAATCATCTTCTACACTGA | 55.59,54.68 | 153 |
| CakTSSR02410 | CakTC30083 | (AG)6      | 168  | 179  | --         | --       | AGTTACCCCACTAGACCAGA   | CATCACTGCCCATATTATT    | 55.42,54.35 | 134 |
| CakTSSR02411 | CakTC30093 | (CT)6      | 2146 | 2157 | Root       | --       |                        |                        |             |     |
| CakTSSR02412 | CakTC30119 | (ATC)5     | 182  | 196  | Young_pod  | --       | AAGGAAGGGTATGAATGAATC  | CTTGAAGGAAACAAATTAGG   | 54.76,55.64 | 155 |
| CakTSSR02413 | CakTC30124 | (TGG)6     | 1007 | 1024 | --         | C3H      | GGTTGTCCTTATGGAGAAAGT  | CTACCGTACCAGTACTACCA   | 54.9,54.75  | 152 |
| CakTSSR02414 | CakTC30125 | (CAC)7     | 323  | 343  | --         | --       | GAAGGTTCAATCCCAATTATGT | GGAGGTGAGGGATTATTCTT   | 55.51,54.73 | 143 |
| CakTSSR02415 | CakTC30126 | (TTC)6     | 139  | 156  | --         | --       | CCCTTCACTCTTCTCACTCTT  | AGTTGATTAGGGTTGTGCTT   | 55.25,55.57 | 149 |
| CakTSSR02416 | CakTC30128 | (TAA)5     | 170  | 184  | --         | --       | CACTACAATAGCAAGCAACCT  | GTGGTTGTTGTGAAGTTGAAT  | 54.86,55.04 | 170 |
| CakTSSR02417 | CakTC30138 | (TC)8      | 2389 | 2404 | --         | --       |                        |                        |             |     |
| CakTSSR02418 | CakTC30147 | (CT)12     | 215  | 238  | --         | HSF      | CTCATTTCATTCATTCATTCG  | GTGGAATGATCTTCAACCATA  | 55.74,54.98 | 150 |
| CakTSSR02419 | CakTC30152 | (AAT)7     | 33   | 53   | --         | --       |                        |                        |             |     |
| CakTSSR02420 | CakTC30152 | (ATC)5     | 1056 | 1070 | --         | --       | TGTCATTGTCATCAATATCCA  | ACTTCTGGTGGATGAGAGTTC  | 54.7,55.8   | 149 |
| CakTSSR02421 | CakTC30160 | (TAT)7     | 1398 | 1418 | --         | --       | CGAGATTTTCGAGGAAGAG    | CAACCTTCATTACATGGAGAC  | 55.15,54.64 | 161 |
| CakTSSR02422 | CakTC30161 | (TCA)5     | 1141 | 1155 | --         | bHLH     | TCAGGTGTTGAAGGAATATG   | AACATAACCCACTTTCTCCAT  | 55.24,55.18 | 150 |
| CakTSSR02423 | CakTC30165 | (TA)6      | 1164 | 1175 | --         | --       |                        |                        |             |     |
| CakTSSR02424 | CakTC30167 | (TC)9      | 3523 | 3540 | Flower bud | --       | GTGTATGAAGCGTTGAGAAAG  | AAACTAGAGGGAGGGACAA    | 55.22,55.46 | 141 |
| CakTSSR02425 | CakTC30170 | (GAC)6     | 1131 | 1148 | --         | --       | CATCTCAGGAAATTCATCAG   | TGGCTTCTTTCAAATATTCAG  | 54.86,54.82 | 147 |
| CakTSSR02426 | CakTC30185 | (ACCCTA)6  | 410  | 445  | --         | --       | CCGTTACTTCAAATCCTTCTT  | TGAGTAAGAGTAAACCGTTGC  | 55.24,54.82 | 152 |
| CakTSSR02427 | CakTC30187 | (TA)9      | 1613 | 1630 | Root       | WRKY     | TGATATGAATATCGGATTGG   | ACACTGCATTGTGTAGAGGAT  | 55.06,54.72 | 133 |
| CakTSSR02428 | CakTC30200 | (AT)6      | 420  | 431  | --         | --       | CACCAAGAGGTACAATATGTCA | GAGTTTTGTGCCATAGAAATG  | 55.21,54.99 | 146 |
| CakTSSR02429 | CakTC30207 | (TCT)5     | 54   | 68   | --         | --       |                        |                        |             |     |
| CakTSSR02430 | CakTC30211 | (TTG)6     | 808  | 825  | --         | --       |                        |                        |             |     |
| CakTSSR02431 | CakTC30212 | (GA)6      | 622  | 633  | --         | --       | TTGTTCTCTCAATTGTTGCTT  | AAAGACAAGGCCAAATAGGTA  | 55.18,55.66 | 138 |
| CakTSSR02432 | CakTC30218 | (AG)9      | 2931 | 2948 | --         | --       |                        |                        |             |     |
| CakTSSR02433 | CakTC30227 | (GTT)7     | 520  | 540  | --         | C2C2-Dof | CACTACCAAATTGAAACAACC  | ATCAAATGGTATTGGTGAACA  | 54.75,55.36 | 152 |
| CakTSSR02434 | CakTC30239 | (CATCCC)10 | 306  | 365  | --         | --       | GTAATCACCAAAATCACCATC  | GTAGAAGGGGACGTAGAAGG   | 54.4,55.49  | 172 |
| CakTSSR02435 | CakTC30244 | (AAC)5     | 102  | 116  | --         | --       | AAAAACACAACAACCTACGAA  | TCCTGAATAAGGGTACAATGA  | 54.99,54.76 | 144 |
| CakTSSR02436 | CakTC30246 | (TAA)19    | 1    | 57   | --         | C3H      |                        |                        |             |     |
| CakTSSR02437 | CakTC30274 | (GAG)5     | 1469 | 1483 | --         | --       | AAGGGTTGATAGCGTTTTTAC  | TTGCTCCTCTTCATTATCTTG  | 55.27,54.79 | 143 |
| CakTSSR02438 | CakTC30280 | (AT)12     | 762  | 785  | --         | --       | GGTTGCTCATGTAGAGAAGA   | CACCAATTAAGTGAAGGATCA  | 54.67,55.24 | 158 |

|              |            |           |      |      |            |      |                       |                        |             |     |
|--------------|------------|-----------|------|------|------------|------|-----------------------|------------------------|-------------|-----|
| CakTSSR02439 | CakTC30282 | (TC)10    | 199  | 218  | --         | --   | TCTTTCTTCTACCCAACAACA | TGAAACATGTAGGGCATTTTA  | 55.03,55.84 | 159 |
| CakTSSR02440 | CakTC30282 | (ATC)5    | 500  | 514  | --         | --   | CCAAAGCTTGACTTAAACTG  | GTTGGTTGTTTCATCTTCTTG  | 54.58,54.85 | 153 |
| CakTSSR02441 | CakTC30282 | (AAC)5    | 750  | 764  | --         | --   | TGCTTTCTGAAGATGATCCTA | TAGAAGCAGAGAATGCAGAAC  | 55.19,55.01 | 155 |
| CakTSSR02442 | CakTC30286 | (CTT)6    | 275  | 292  | --         | HSF  | GAGTTTTTAACCGCTCTCTC  | CCTTCAACTTTTCTTTTCCT   | 55.11,54.57 | 157 |
| CakTSSR02443 | CakTC30286 | (GGT)5    | 1061 | 1075 | --         | HSF  | GAGTTGGTGGGTTTCTAAAG  | ACCAAAACAGTTTCAAACAATC | 55.55,54.28 | 156 |
| CakTSSR02444 | CakTC30291 | (AGT)6    | 157  | 174  | --         | --   | CCAATTTTGAACGTGTTTGTC | CGATGATAACTTCGATTTTGA  | 54.88,55.49 | 158 |
| CakTSSR02445 | CakTC30292 | (ACA)6    | 236  | 253  | --         | --   | CACGACCTACTCCTCTAAGAA | GGTGTGGTGTGAATTACCTTA  | 53.88,55.02 | 148 |
| CakTSSR02446 | CakTC30292 | (CAT)5    | 355  | 369  | --         | --   | GTGACTTCATGAACCTCGTT  | CTTTGTGCACTTGTTTCTTT   | 55.09,54.87 | 160 |
| CakTSSR02447 | CakTC30303 | (TTG)5    | 961  | 975  | --         | --   |                       |                        |             |     |
| CakTSSR02448 | CakTC30314 | (CATTCC)5 | 298  | 327  | --         | --   | TTCTTAGTAGAATCGGGCTCT | GTAGAAGGGTAGGTGGAGAGA  | 55.08,55.06 | 157 |
| CakTSSR02449 | CakTC30318 | (TAA)8    | 13   | 36   | --         | --   |                       |                        |             |     |
| CakTSSR02450 | CakTC30327 | (GTT)7    | 1574 | 1594 | --         | --   | AAACATCAAGTGAAAGCAAAC | GGGTTCTCAACAAAACATAA   | 54.61,54.41 | 161 |
| CakTSSR02451 | CakTC30327 | (AAG)8    | 1849 | 1872 | --         | --   | TCCTCGTCATTTTCTAATCA  | CCAAAGCTCAAGAAACAGTAA  | 55.05,54.96 | 167 |
| CakTSSR02452 | CakTC30331 | (TCAC)6   | 38   | 61   | --         | --   |                       |                        |             |     |
| CakTSSR02453 | CakTC30338 | (CT)8     | 151  | 166  | --         | --   | CCTCTCATCATCTATCAAAA  | GGTGAAAGTCGTAATTGAA    | 54.38,55.22 | 155 |
| CakTSSR02454 | CakTC30350 | (TGA)6    | 208  | 225  | Flower bud | TCP  | TGAAATTGTGCTTCCTTAG   | TGAAACACCAAGAGATGATT   | 54.9,54.77  | 140 |
| CakTSSR02455 | CakTC30357 | (GAT)5    | 683  | 697  | --         | --   | GAGCTCGTCAGACAATACATC | TCAGAATTGCTGCAATATCA   | 54.94,54.33 | 148 |
| CakTSSR02456 | CakTC30359 | (AGAA)8   | 1640 | 1671 | --         | TCP  |                       |                        |             |     |
| CakTSSR02457 | CakTC30360 | (AAT)6    | 5    | 22   | --         | --   |                       |                        |             |     |
| CakTSSR02458 | CakTC30363 | (CA)6     | 80   | 91   | --         | --   |                       |                        |             |     |
| CakTSSR02459 | CakTC30368 | (AG)11    | 1246 | 1267 | --         | --   |                       |                        |             |     |
| CakTSSR02460 | CakTC30386 | (CAA)8    | 326  | 349  | Young_pod  | --   | CAACCGAACAATATTACCAT  | CAGCTTCATACCTTCTCAAAG  | 54.28,54.46 | 150 |
| CakTSSR02461 | CakTC30396 | (TAA)11   | 385  | 417  | --         | --   | TTGTTGTGCTTATGGTCTTT  | AATAGTTGAAGAGGGGAAAAA  | 55.07,54.76 | 150 |
| CakTSSR02462 | CakTC30400 | (ATC)5    | 1051 | 1065 | --         | --   | AAGGAGCAGGTCATAGGTAAC | TAAGAAGTCTGATCCTGATGG  | 55.1,54.43  | 143 |
| CakTSSR02463 | CakTC30407 | (TA)6     | 1527 | 1538 | --         | --   | GCTTAAATCTTAGGAGGCTGT | ATTTGTTCTCTGTTCCTC     | 54.7,55.03  | 149 |
| CakTSSR02464 | CakTC30411 | (CTA)5    | 206  | 220  | Shoot      | --   | CGCTTCACAATAGAGAAATCA | ATGTCTTTTCTTCATTGTT    | 54.86,55.31 | 152 |
| CakTSSR02465 | CakTC30420 | (CAA)6    | 85   | 102  | Young_pod  | --   |                       |                        |             |     |
| CakTSSR02466 | CakTC30426 | (TA)8     | 1776 | 1791 | Root       | --   |                       |                        |             |     |
| CakTSSR02467 | CakTC30437 | (CAA)13   | 81   | 119  | --         | --   |                       |                        |             |     |
| CakTSSR02468 | CakTC30441 | (GTG)5    | 1258 | 1272 | --         | WRKY | GATGATGTTGAAGGTTGGTAA | TCTAACGGTTATGGAAGAAGA  | 55.06,54.25 | 150 |
| CakTSSR02469 | CakTC30441 | (GA)10    | 1386 | 1405 | --         | WRKY |                       |                        |             |     |
| CakTSSR02470 | CakTC30442 | (TTC)10   | 186  | 215  | --         | --   | TCACTTTCACCTTCTTTTCA  | GCATCTCCTTCTCATACTCT   | 55.16,55.12 | 161 |
| CakTSSR02471 | CakTC30446 | (AAC)5    | 390  | 404  | --         | --   | TACTACTTCGATCTCCGATCA | ACTTCTTCATCATCGAAACCT  | 55.06,55.46 | 152 |
| CakTSSR02472 | CakTC30454 | (GA)12    | 2303 | 2326 | --         | --   | ATTGCTACCTTAACCTTACCG | GGAAATTCGAGATAGGAGAGA  | 55.31,55.2  | 171 |
| CakTSSR02473 | CakTC30455 | (ACA)5    | 136  | 150  | Shoot      | --   | TTACTTCACCAACCAAGAAAC | ACTTCTGGTCTTGCAATTATGA | 54.46,54.97 | 144 |
| CakTSSR02474 | CakTC30460 | (GA)6     | 2439 | 2450 | --         | --   |                       |                        |             |     |
| CakTSSR02475 | CakTC30466 | (GGCGGT)5 | 1270 | 1299 | --         | --   | ACGTTGAATTTCTCATTCTGA | GCTATTCTCCAATTCTCCAC   | 54.93,55.54 | 162 |

|              |            |           |      |      |           |        |                        |                        |             |     |
|--------------|------------|-----------|------|------|-----------|--------|------------------------|------------------------|-------------|-----|
| CakTSSR02476 | CakTC30483 | (TCA)5    | 1848 | 1862 | --        | --     |                        |                        |             |     |
| CakTSSR02477 | CakTC30484 | (AAC)5    | 389  | 403  | Shoot     | --     | GTAGGTAAGGCTTGGAGGTTA  | ATCAAACCACAAATGAGTGAC  | 55.27,54.95 | 146 |
| CakTSSR02478 | CakTC30491 | (TTC)13   | 559  | 597  | --        | --     | ATTACACACCGCTTAGCAT    | ACACATCCATCCATAAAATCA  | 55.04,55.28 | 158 |
| CakTSSR02479 | CakTC30499 | (TC)15    | 2641 | 2670 | --        | --     |                        |                        |             |     |
| CakTSSR02480 | CakTC30525 | (TTC)5    | 1486 | 1500 | --        | --     | ATTTCAGTAGTTCAGTTCC    | CTATCGGAATCAGAATCGTT   | 54.9,54.39  | 152 |
| CakTSSR02481 | CakTC30527 | (CT)6     | 77   | 88   | --        | --     |                        |                        |             |     |
| CakTSSR02482 | CakTC30542 | (AAT)8    | 722  | 745  | --        | --     | ATCACCTCTTCTCAAATCC    | GTACCAATTATGTTGCGATTTC | 54.95,54.79 | 152 |
| CakTSSR02483 | CakTC30568 | (GCC)5    | 1258 | 1272 | --        | --     | CTTGAGAAGGAGGTAGTGGTT  | GAAGACCCTTCTCAGTTGATT  | 55.14,55.01 | 148 |
| CakTSSR02484 | CakTC30570 | (AAG)6    | 45   | 62   | --        | bZIP   |                        |                        |             |     |
| CakTSSR02485 | CakTC30575 | (CAT)6    | 126  | 143  | Young_pod | ARR-B  | CTTCTCTCTGAAAACCTAACC  | TGAGAGATCTAGAAACGGAAG  | 54.82,53.91 | 138 |
| CakTSSR02486 | CakTC30581 | (GTA)6    | 816  | 833  | --        | --     |                        |                        |             |     |
| CakTSSR02487 | CakTC30587 | (AT)16    | 271  | 302  | --        | --     | CTCCCAAGCTTATTTTTCTTC  | AACTTCATACAGAGCCATCA   | 55.06,54.97 | 157 |
| CakTSSR02488 | CakTC30592 | (TA)7     | 157  | 170  | --        | --     | GGTTAAGGTTTCTGTGAGGAT  | CGATTGAATGTGAAATGAA    | 54.9,54.59  | 150 |
| CakTSSR02489 | CakTC30623 | (TC)7     | 122  | 135  | --        | --     | TATTTCAATTCCTCCCTCTC   | ATGTTGGATCACAAGTACTGC  | 55.05,55.16 | 151 |
| CakTSSR02490 | CakTC30636 | (TGA)6    | 151  | 168  | --        | --     | AACCATTAATTCCAATCCACT  | TGCTCCCAATCAGATGTAATA  | 55.12,55.77 | 152 |
| CakTSSR02491 | CakTC30638 | (CT)8     | 821  | 836  | --        | --     | GTCAAATGCACATTTAAACC   | TCATTAAATGGATGGTAGGAA  | 54.84,54.7  | 154 |
| CakTSSR02492 | CakTC30643 | (AG)9     | 1903 | 1920 | --        | --     | TCATTCAGAAATGAGGTCAAG  | GCAAATCCTCTTTTCTCTCTC  | 55.36,54.98 | 166 |
| CakTSSR02493 | CakTC30648 | (GA)9     | 1924 | 1941 | --        | --     |                        |                        |             |     |
| CakTSSR02494 | CakTC30664 | (TGA)7    | 1005 | 1025 | --        | --     | ACAAGAGGAAGATGACAATGA  | ACGTTTAGACTTGGACGACTT  | 54.74,55.65 | 148 |
| CakTSSR02495 | CakTC30666 | (TGT)5    | 274  | 288  | --        | --     | GTTGTTGTTGGAACATCATTT  | AGGCTATGGACATGAAGAAA   | 54.97,54.87 | 161 |
| CakTSSR02496 | CakTC30668 | (ATC)7    | 486  | 506  | --        | --     | GTTGAAATGATCGAGATGAAG  | TAAGATCCTGAACCCGATACT  | 54.85,55.43 | 151 |
| CakTSSR02497 | CakTC30675 | (AT)7     | 183  | 196  | --        | --     | CAACCTTCATCACAAGTTTTC  | AGGGATCCAGGTTAGAAGTTA  | 54.85,54.61 | 158 |
| CakTSSR02498 | CakTC30694 | (AAC)5    | 267  | 281  | --        | --     | GTGAAAGAAGAAAGCAAAATG  | CTGTCGAAATTGGTGTACTC   | 54.45,54.89 | 149 |
| CakTSSR02499 | CakTC30698 | (ATG)7    | 391  | 411  | --        | --     | AAAAAGCAACAAGAAACACAG  | CAACCATAGCAAAATTGAGAG  | 54.87,55.16 | 157 |
| CakTSSR02500 | CakTC30701 | (TA)13    | 109  | 134  | --        | --     | ACTTCCAACCTCCAAAAATCT  | AATTGCCACATCTTCAACTA   | 54.65,54.99 | 155 |
| CakTSSR02501 | CakTC30706 | (AG)6     | 1531 | 1542 | --        | --     |                        |                        |             |     |
| CakTSSR02502 | CakTC30707 | (CTC)6    | 1503 | 1520 | --        | MYB    | CCATGGACCTTTCTTTAACT   | TTGAATGAAGTTGTTGAAGGT  | 55.09,54.85 | 149 |
| CakTSSR02503 | CakTC30713 | (AAAAAC)5 | 179  | 208  | --        | SRS    | CTCCTCTCTCTATCTTCACAT  | ATGATGGAGTTTGAGCTATGA  | 54.97,54.88 | 170 |
| CakTSSR02504 | CakTC30713 | (ATA)5    | 794  | 808  | --        | SRS    | TGGTGGTTCTAATGGAAGTAA  | CAGCATCTGATGACAAGAAC   | 54.84,55.9  | 155 |
| CakTSSR02505 | CakTC30718 | (CAT)6    | 1044 | 1061 | --        | --     | CTTCAAGTGGAATACCAAAA   | TGAAATGATGACACTGATGA   | 54.59,54.91 | 155 |
| CakTSSR02506 | CakTC30718 | (GAT)6    | 1469 | 1486 | --        | --     | GGGTTGAAGAGTTAGCTAGAGA | ACCTCTCAATCCCAATTACTG  | 54.74,55.75 | 171 |
| CakTSSR02507 | CakTC30740 | (AAT)6    | 1744 | 1761 | --        | --     | TAATTGAGTGGAGGTTTCATGT | CCTTTAAGCAGCAACAATAAA  | 54.64,55.1  | 141 |
| CakTSSR02508 | CakTC30741 | (GAA)5    | 1684 | 1698 | --        | --     | CTTTCTCTCCCTTTGAAAGAT  | AGAATCCAACGTAAAAAGGTT  | 54.46,54.65 | 170 |
| CakTSSR02509 | CakTC30747 | (TCATA)5  | 223  | 247  | --        | --     | GTTGACTCCAACAAAAACAAA  | GATTTCATGATCCCTCTTTTTC | 55.36,55.27 | 147 |
| CakTSSR02510 | CakTC30750 | (ATT)6    | 1096 | 1113 | --        | RWP-RK | GTTATTCCTCCAAAGGTAAG   | ACAATCCAACTAAATCACCA   | 55.03,54.67 | 143 |
| CakTSSR02511 | CakTC30757 | (TGT)5    | 1178 | 1192 | --        | --     | GGAGAGAAGAGACAGTGAAT   | ACCTCGTACAACAATTCCT    | 54.99,55.42 | 135 |
| CakTSSR02512 | CakTC30757 | (GGA)6    | 1307 | 1324 | --        | --     |                        |                        |             |     |

|              |            |          |      |      |       |           |                        |                       |             |     |
|--------------|------------|----------|------|------|-------|-----------|------------------------|-----------------------|-------------|-----|
| CakTSSR02513 | CakTC30765 | (TGG)5   | 2520 | 2534 | --    | --        | TTCATCCTTATCTGTGTGG    | TTCATGGTGCCACTAATACTT | 55.24,54.86 | 141 |
| CakTSSR02514 | CakTC30779 | (GA)10   | 131  | 150  | --    | VARL      | TGTCTTCTGAAGCAGTTGGT   | AGGGTCAGAGAAAGTTAGGAA | 55.98,54.79 | 150 |
| CakTSSR02515 | CakTC30781 | (CAA)5   | 184  | 198  | --    | --        | CACTCAGTACGGAAAACTTG   | GGAGGATTATCAACAACCTT  | 55.15,54.84 | 146 |
| CakTSSR02516 | CakTC30784 | (AATAG)5 | 3922 | 3946 | --    | --        |                        |                       |             |     |
| CakTSSR02517 | CakTC30793 | (GGC)5   | 134  | 148  | --    | --        | ATGCGACTAGGAAAAAGAAAT  | TAAACCGTTGTGTTTAAGGA  | 54.93,55.1  | 147 |
| CakTSSR02518 | CakTC30793 | (AG)6    | 1428 | 1439 | --    | --        | GTTGATAAGGACAATGTGTGG  | AACAACCTTAACCTCCGTCTC | 55.43,55.14 | 162 |
| CakTSSR02519 | CakTC30814 | (AG)6    | 1437 | 1448 | --    | --        |                        |                       |             |     |
| CakTSSR02520 | CakTC30820 | (AGT)5   | 118  | 132  | --    | AP2-EREBP | TACAATTCACCCCTATGCAACT | GCCTAAGATTATTGGAGCTTT | 54.86,54.65 | 152 |
| CakTSSR02521 | CakTC30832 | (GAA)5   | 189  | 203  | --    | ABI3VP1   | TCCTCATGAGGTACCTTGAAA  | TGCAAAAAGACTAAGGTTGTT | 54.95,54.41 | 144 |
| CakTSSR02522 | CakTC30849 | (TA)6    | 227  | 238  | Root  | HB        | ACTCAATCGAAAGGGTACTT   | TATGTATGACCCCTGAAATTG | 54.68,55.05 | 147 |
| CakTSSR02523 | CakTC30859 | (GTT)5   | 2055 | 2069 | --    | --        | TTGCTACGATGAGTTCGTAAT  | CTTAAACTCACCAAAACCAAT | 55.18,55.82 | 165 |
| CakTSSR02524 | CakTC30862 | (GT)7    | 507  | 520  | --    | --        |                        |                       |             |     |
| CakTSSR02525 | CakTC30869 | (TCA)5   | 456  | 470  | --    | --        | TCTGATTATTGATCCTTCCA   | TGATTCAAGTTGGTCTATTGG | 54.8,55.16  | 146 |
| CakTSSR02526 | CakTC30869 | (TAT)5   | 1095 | 1109 | --    | --        | ACCAATTGATAAAAGCCAAA   | TTCTTCAAGTTGCTTAATTGG | 54.92,54.9  | 157 |
| CakTSSR02527 | CakTC30869 | (TC)8    | 1676 | 1691 | --    | --        |                        |                       |             |     |
| CakTSSR02528 | CakTC30874 | (ACTC)6  | 134  | 157  | --    | --        | AAGAGATCCAATCACCTTTTC  | TAGTGTTAAGGTGGTGAAGGA | 54.95,54.9  | 144 |
| CakTSSR02529 | CakTC30875 | (TTC)5   | 2358 | 2372 | Root  | --        | AACAGAGGGAAGTTTAGCTGT  | TTATCCAAGCTAAAGCAAGA  | 54.9,54.76  | 150 |
| CakTSSR02530 | CakTC30882 | (GCA)5   | 613  | 627  | --    | Trihelix  | TCCTCTCGTGTTCATGTTCT   | ATAATGGTTACTTTCGGAGGA | 55,55.44    | 151 |
| CakTSSR02531 | CakTC30883 | (TC)9    | 227  | 244  | --    | --        | GTGCATTTTTCAGTTCCATTA  | ACGATAATGCTGAGAAGATGA | 55.4,55.05  | 146 |
| CakTSSR02532 | CakTC30885 | (ATA)7   | 822  | 842  | --    | --        | ACTGGTTTACTGAGGGTTTTC  | GAAACCAGGCAATTGTAGTAA | 54.98,54.61 | 175 |
| CakTSSR02533 | CakTC30904 | (TA)9    | 1499 | 1516 | Shoot | --        | TCACACTCTCTCGTTCTCATT  | GGGAAATGTATACGGAAAAA  | 54.98,55.03 | 152 |
| CakTSSR02534 | CakTC30906 | (CAA)6   | 151  | 168  | --    | GRAS      | CATTAATGGCTACTTGTGCTT  | GAAGCATGTTGTTGTGTTGA  | 54.8,54.69  | 150 |
| CakTSSR02535 | CakTC30906 | (AAC)8   | 1235 | 1258 | --    | GRAS      | ACACACTCAAGAACTTCCA    | CTAAATCAGCAGCAGTAGGTG | 54.92,55.42 | 150 |
| CakTSSR02536 | CakTC30909 | (ATG)5   | 814  | 828  | --    | --        | GTTTCATTGATCTTGTGGAAG  | TGTAGCATTAACCTGTGCTGA | 54.77,54.72 | 149 |
| CakTSSR02537 | CakTC30914 | (GTA)7   | 687  | 707  | --    | HB        | CCATGATAAGAAGACAACCTG  | CACAAGGGTTTATGATAGTGC | 54.82,54.86 | 150 |
| CakTSSR02538 | CakTC30929 | (TTG)6   | 94   | 111  | --    | G2-like   |                        |                       |             |     |
| CakTSSR02539 | CakTC30929 | (GAA)8   | 227  | 250  | --    | G2-like   | AACATCATCATCAAGTTGGAG  | TGAAGAAGAAGCACTTAATGG | 55.05,54.88 | 154 |
| CakTSSR02540 | CakTC30929 | (CTT)5   | 582  | 596  | --    | G2-like   | CATCAAAAGGCTTCTCCTAAT  | CTCTCATGCTACGTTTGAAG  | 55.32,55.39 | 157 |
| CakTSSR02541 | CakTC30943 | (CAA)5   | 69   | 83   | --    | --        |                        |                       |             |     |
| CakTSSR02542 | CakTC30945 | (TG)9    | 514  | 531  | --    | --        | TACGGAATTCAGGCATAATA   | GGGTCGGGATATTTATTTA   | 55.07,54.95 | 138 |
| CakTSSR02543 | CakTC30946 | (TAT)8   | 119  | 142  | --    | --        | CCACCATTTTCATTTTCATT   | GGGAAGTTACGGTTAGATTGT | 54.99,54.96 | 164 |
| CakTSSR02544 | CakTC30953 | (AGA)6   | 669  | 686  | --    | C2C2-Dof  | ATTGGGAGCTATTTCAATGTT  | GTTCCACAAAGACATAACAA  | 55.43,55.15 | 151 |
| CakTSSR02545 | CakTC30957 | (AT)7    | 703  | 716  | --    | NAC       | GGCTGAATATGGCTTTACTCT  | TGTAATCCAAAGTTTGTCTG  | 55.34,55.64 | 167 |
| CakTSSR02546 | CakTC30966 | (CAA)7   | 577  | 597  | --    | --        | CAACAAAATAGATGTTGATGGA | TGGTAGTTCCTTTCTCTTC   | 55.26,55.2  | 150 |
| CakTSSR02547 | CakTC30970 | (CAT)5   | 129  | 143  | --    | --        | ACCTGTAAACAAAGCAATCTCA | CAAGTGCTAGGACAGTTCATT | 55.05,54.63 | 153 |
| CakTSSR02548 | CakTC30970 | (AG)6    | 2555 | 2566 | --    | --        |                        |                       |             |     |
| CakTSSR02549 | CakTC30972 | (TCA)5   | 317  | 331  | --    | --        | ATAACTGGTTGGGTTTTCTC   | GTGTAGGAACAGTGTGGAAG  | 54.92,54.78 | 150 |

|              |            |           |      |      |            |             |                        |                        |             |     |
|--------------|------------|-----------|------|------|------------|-------------|------------------------|------------------------|-------------|-----|
| CakTSSR02550 | CakTC30981 | (TC)9     | 27   | 44   | --         | --          |                        |                        |             |     |
| CakTSSR02551 | CakTC30998 | (TA)8     | 1084 | 1099 | --         | MYB-related |                        |                        |             |     |
| CakTSSR02552 | CakTC31004 | (ATTCAT)5 | 1545 | 1574 | --         | --          | CATATTCTGCATTGGATAAGG  | AGCTCAAATGAATTTGTCTCA  | 54.9,55.1   | 142 |
| CakTSSR02553 | CakTC31007 | (ATAA)5   | 466  | 485  | --         | --          | CTCTATGAAGCCAATGAGATG  | CATTTTCTCTCCACACTCAAC  | 55.06,54.83 | 143 |
| CakTSSR02554 | CakTC31014 | (AAC)5    | 698  | 712  | --         | --          | GGTTGTTTCGACATGTTTTTA  | CTTGAAACAACAAGATCACCAT | 55.32,55.13 | 150 |
| CakTSSR02555 | CakTC31022 | (GTT)5    | 1626 | 1640 | --         | Trihelix    | GTTTCCTCTGAAGATGTTGAA  | CATCAATTAACTCACAACC    | 54.47,54.67 | 154 |
| CakTSSR02556 | CakTC31022 | (TC)7     | 2380 | 2393 | --         | Trihelix    | TTTCATCATCTCTGAATTTG   | AACAAGGGAGAGAAAGAGAGA  | 55.29,54.89 | 190 |
| CakTSSR02557 | CakTC31029 | (TC)6     | 127  | 138  | --         | --          | CAATTCAATCATGCTCACAC   | AAATTACAACGAAGATGATGG  | 54.92,54.36 | 143 |
| CakTSSR02558 | CakTC31034 | (CT)6     | 43   | 54   | --         | --          |                        |                        |             |     |
| CakTSSR02559 | CakTC31034 | (CAC)6    | 333  | 350  | --         | --          | AAGAAGAATTCTCCATCAACC  | GTATTCTGGAAGAAAGGAAT   | 54.95,55    | 124 |
| CakTSSR02560 | CakTC31034 | (AAC)7    | 626  | 646  | --         | --          | GTAACGTTAGGAATGTTGTCG  | AGCAGTTGAATTTGAATCTTG  | 54.95,54.7  | 153 |
| CakTSSR02561 | CakTC31047 | (TCC)7    | 741  | 761  | Shoot      | --          | GAAAAGGCTTCATCATCTACA  | AAGAGAATTCTTGATCCCAAC  | 54.62,54.95 | 146 |
| CakTSSR02562 | CakTC31048 | (TC)19    | 1957 | 1994 | --         | --          | AGCTGTACTCTTCATAGT     | TCTCACTCACTCACACTCA    | 55.01,55.13 | 150 |
| CakTSSR02563 | CakTC31053 | (TA)8     | 194  | 209  | Shoot      | --          | AACAATATATGCAAGGGAACA  | TTGGAGTCCAGAAGATAAGA   | 54.81,54.17 | 150 |
| CakTSSR02564 | CakTC31053 | (GA)6     | 1475 | 1486 | Shoot      | --          |                        |                        |             |     |
| CakTSSR02565 | CakTC31066 | (CTA)6    | 249  | 266  | --         | --          | AACAGCACAAGATACTCCAAA  | GTGTTGGTTTTCCCATATTTA  | 55.05,54.24 | 149 |
| CakTSSR02566 | CakTC31067 | (ATA)5    | 13   | 27   | --         | --          |                        |                        |             |     |
| CakTSSR02567 | CakTC31075 | (TAC)5    | 518  | 532  | --         | --          | TAGTTAAACCATTGAGCAGGA  | ATATCAAGGAAGGGAAATTCA  | 55.16,55.33 | 150 |
| CakTSSR02568 | CakTC31081 | (GTA)5    | 1302 | 1316 | --         | GRF         | GGCGGAATAATTGAAGTAGTAG | GTTGTCGATCAAAAGTATTGC  | 55.01,54.98 | 158 |
| CakTSSR02569 | CakTC31081 | (ATC)5    | 1967 | 1981 | --         | GRF         | CTAAGCATTTGTTGTGGTGT   | GTTTCAAAGTTCAAAACTC    | 55.42,54.36 | 154 |
| CakTSSR02570 | CakTC31081 | (GA)8     | 2309 | 2324 | --         | GRF         |                        |                        |             |     |
| CakTSSR02571 | CakTC31093 | (TTC)5    | 136  | 150  | --         | --          | GGACGAAACATTCTCTAACA   | ATAACCGATGAGGAGAAGAAG  | 54.54,55.15 | 158 |
| CakTSSR02572 | CakTC31101 | (GTA)6    | 378  | 395  | Flower bud | --          | CAGAACCACATATGGAACACT  | ATGATCCAACAATGAATACCA  | 55,55.28    | 117 |
| CakTSSR02573 | CakTC31103 | (ACA)6    | 201  | 218  | --         | Trihelix    | TCTAAAGTTTCTTCCTTTTCG  | GTGAGGATTTTGTGAATTTG   | 54.91,54.79 | 158 |
| CakTSSR02574 | CakTC31103 | (AAC)6    | 389  | 406  | --         | Trihelix    | CTGACAACAACACATCAAC    | CCTTACCATTGTATCTGTCCA  | 54.82,55.11 | 150 |
| CakTSSR02575 | CakTC31107 | (AAT)8    | 1369 | 1392 | --         | --          | AAGGAAAAAGGGTAACAGTA   | GTTGGGTTTGAGAGTCTGAGT  | 54.72,55.87 | 163 |
| CakTSSR02576 | CakTC31109 | (GT)12    | 2140 | 2163 | --         | --          | GGGTGTTTGTGTTGTGTT     | TCTTCTCTCCTCATTATCA    | 55.04,54.97 | 166 |
| CakTSSR02577 | CakTC31122 | (AG)8     | 98   | 113  | --         | --          |                        |                        |             |     |
| CakTSSR02578 | CakTC31123 | (CT)13    | 12   | 37   | --         | --          |                        |                        |             |     |
| CakTSSR02579 | CakTC31126 | (CT)6     | 4    | 15   | Flower bud | --          |                        |                        |             |     |
| CakTSSR02580 | CakTC31135 | (AAC)5    | 658  | 672  | --         | MYB         | CAATTGCAAGTCAAGAAAAAG  | GGATTCAATCTCGTTGACTAA  | 55.36,54.45 | 155 |
| CakTSSR02581 | CakTC31138 | (TCA)5    | 16   | 30   | --         | CCAAT       |                        |                        |             |     |
| CakTSSR02582 | CakTC31139 | (CAA)6    | 425  | 442  | --         | SRS         | AACAGAAGACAACAACAAGGA  | GTGGATTAAATTCGTTGGACT  | 54.92,55.74 | 138 |
| CakTSSR02583 | CakTC31139 | (TGG)6    | 1174 | 1191 | --         | SRS         | ATCCTTCACACGATGTTTATG  | TACCTTGTGAAGTTGAAAA    | 55.1,55.05  | 153 |
| CakTSSR02584 | CakTC31142 | (CAT)6    | 146  | 163  | --         | --          | AGGACAAAGTGTCACAAAGT   | ATGAATTGCTAACCTCTTT    | 54.66,54.78 | 149 |
| CakTSSR02585 | CakTC31145 | (CT)6     | 4    | 15   | --         | HSF         |                        |                        |             |     |
| CakTSSR02586 | CakTC31145 | (TTCT)5   | 1203 | 1222 | --         | HSF         |                        |                        |             |     |

|              |            |           |      |      |           |       |                       |                        |             |     |
|--------------|------------|-----------|------|------|-----------|-------|-----------------------|------------------------|-------------|-----|
| CakTSSR02587 | CakTC31146 | (TCA)5    | 286  | 300  | --        | --    | CTGGTACTCAGAAAAGGAAAA | TGTATTGATGATGTCATGGTG  | 53.89,55.09 | 155 |
| CakTSSR02588 | CakTC31147 | (TGA)7    | 367  | 387  | --        | --    | CCTCCTTTGTAATGGTCTTCT | TGGCTGATCAACATCAAGTA   | 55.07,55.11 | 151 |
| CakTSSR02589 | CakTC31154 | (TG)6     | 331  | 342  | --        | --    | CCTCTGTTCTCTGTTTTGTTG | GTCAAGATAGGGGATGAAAAAT | 55.1,54.76  | 145 |
| CakTSSR02590 | CakTC31156 | (CAC)6    | 106  | 123  | --        | mTERF | CCACAACATCATCTTCAATTC | ACGAAAGAGTTTGTTTCAGAT  | 55.48,55.54 | 150 |
| CakTSSR02591 | CakTC31158 | (CT)8     | 1    | 16   | --        | --    |                       |                        |             |     |
| CakTSSR02592 | CakTC31159 | (AT)6     | 408  | 419  | --        | --    | TTTTAACCCAGTTGCTTACAC | TAAATGTAAAACGCACCTGTC  | 54.69,55.51 | 143 |
| CakTSSR02593 | CakTC31164 | (TC)7     | 2249 | 2262 | --        | --    |                       |                        |             |     |
| CakTSSR02594 | CakTC31167 | (TA)10    | 430  | 449  | --        | --    | TACATGAAGCAACATGCTAAA | TGAATGTGGTTAAGGTATTGG  | 54.66,55.13 | 159 |
| CakTSSR02595 | CakTC31179 | (TGG)6    | 1257 | 1274 | --        | --    | AAGTGGCAAAATAAACTGGAG | ACCAGTGTACTCTCCACCAC   | 54.57,54.84 | 151 |
| CakTSSR02596 | CakTC31180 | (AAATTG)5 | 70   | 99   | --        | --    |                       |                        |             |     |
| CakTSSR02597 | CakTC31204 | (ATT)5    | 2348 | 2362 | --        | --    | TCACCAGAAGAATCAAAAGAA | GTGGTAAAGGGTTCAGAGATT  | 55.08,54.9  | 167 |
| CakTSSR02598 | CakTC31216 | (GAA)7    | 2425 | 2445 | --        | HB    |                       |                        |             |     |
| CakTSSR02599 | CakTC31222 | (AT)11    | 1183 | 1204 | --        | --    |                       |                        |             |     |
| CakTSSR02600 | CakTC31233 | (CAG)5    | 1018 | 1032 | --        | --    |                       |                        |             |     |
| CakTSSR02601 | CakTC31238 | (CTC)6    | 361  | 378  | --        | --    | TTCTCCAATTCACTCACTAA  | TCTTCAACGTCCTTAACTGAA  | 54.95,55.19 | 141 |
| CakTSSR02602 | CakTC31260 | (TC)9     | 3681 | 3698 | --        | --    |                       |                        |             |     |
| CakTSSR02603 | CakTC31281 | (TCACCT)5 | 220  | 249  | --        | --    | TGATTGTTAAGTCTCCACAT  | CAACAAAGAGCTTGTTAGAGG  | 54.64,54.55 | 150 |
| CakTSSR02604 | CakTC31290 | (ATT)5    | 774  | 788  | --        | --    | AGAGAAGAGAGTGCATGATGA | TAATAATCCCCTTCCATGTT   | 55.06,55.22 | 147 |
| CakTSSR02605 | CakTC31292 | (TAAT)5   | 348  | 367  | --        | --    | AAGCGCTGTATTGTATGAATC | TGAGGAACCAATTAGATCAAG  | 54.7,54.47  | 151 |
| CakTSSR02606 | CakTC31295 | (GA)8     | 15   | 30   | --        | --    |                       |                        |             |     |
| CakTSSR02607 | CakTC31296 | (CCA)5    | 378  | 392  | --        | --    | TACCAATCCCGTATAACAGAA | TCTTGGGAGCTTTAAACTT    | 54.82,55.14 | 162 |
| CakTSSR02608 | CakTC31301 | (GAC)5    | 859  | 873  | --        | --    | CAGTACATCCCAAGACCATA  | TTGGTTGTGCTAGAAGGATTA  | 55.11,55.16 | 165 |
| CakTSSR02609 | CakTC31305 | (TCT)7    | 64   | 84   | --        | --    |                       |                        |             |     |
| CakTSSR02610 | CakTC31313 | (CCA)5    | 290  | 304  | --        | --    | CAATTCATGTACCTCGTCATC | TAGTTGAGCTATGTGGTCAGG  | 55.52,55.51 | 145 |
| CakTSSR02611 | CakTC31333 | (ATC)5    | 85   | 99   | Young_pod | --    |                       |                        |             |     |
| CakTSSR02612 | CakTC31338 | (AT)12    | 97   | 120  | --        | LOB   |                       |                        |             |     |
| CakTSSR02613 | CakTC31353 | (GAG)7    | 893  | 913  | --        | --    |                       |                        |             |     |
| CakTSSR02614 | CakTC31370 | (TCT)10   | 3521 | 3550 | --        | --    |                       |                        |             |     |
| CakTSSR02615 | CakTC31375 | (GA)15    | 95   | 124  | --        | --    |                       |                        |             |     |
| CakTSSR02616 | CakTC31378 | (GAA)5    | 1331 | 1345 | --        | --    | CCTAATACCCCAAGAAACAGT | ATGTCCCACTTTATCAAACAA  | 54.97,54.67 | 159 |
| CakTSSR02617 | CakTC31385 | (TC)8     | 252  | 267  | --        | --    | GCTGTGATTGTAACGAAAAAC | CAAAGTTGATCCATTTCCTCT  | 55.06,55.88 | 159 |
| CakTSSR02618 | CakTC31394 | (GA)10    | 1305 | 1324 | --        | --    |                       |                        |             |     |
| CakTSSR02619 | CakTC31396 | (TTAT)8   | 2828 | 2859 | --        | --    | ATTGGTGAATAGTGCCAATAG | CATTACCTGTGCAGATTCTC   | 54.4,54.97  | 159 |
| CakTSSR02620 | CakTC31401 | (ACA)6    | 193  | 210  | --        | --    | GTATGCGTCCAGAAATATTCA | AGAGTAACACCAGCCATTGTA  | 55.35,54.93 | 148 |
| CakTSSR02621 | CakTC31416 | (GAG)5    | 620  | 634  | --        | --    | GTTGAATAACGAGAAGGGTTC | CCTCTTCCACTACTCCTTCAT  | 55.46,55.06 | 151 |
| CakTSSR02622 | CakTC31433 | (GT)12    | 3927 | 3950 | --        | --    |                       |                        |             |     |
| CakTSSR02623 | CakTC31438 | (AG)7     | 18   | 31   | --        | --    |                       |                        |             |     |

|              |            |         |      |      |            |                |                       |                        |             |     |
|--------------|------------|---------|------|------|------------|----------------|-----------------------|------------------------|-------------|-----|
| CakTSSR02624 | CakTC31443 | (AAC)5  | 209  | 223  | Root       | --             | AGCCTTCATCTAAAATCAACC | GTTGTGAGAAACAACCAACAG  | 55.15,55.72 | 164 |
| CakTSSR02625 | CakTC31447 | (TAA)5  | 681  | 695  | Root       | --             |                       |                        |             |     |
| CakTSSR02626 | CakTC31449 | (AAC)5  | 137  | 151  | --         | --             | AAACTTCAATCACAATCTTGC | TTTTGCTTCTTTGGAGAGTAA  | 54.53,54.62 | 140 |
| CakTSSR02627 | CakTC31455 | (TTG)5  | 1230 | 1244 | Flower bud | --             | ATGCTTGAATGAGTCTACGAA | CAGAGAAAAACATCGAAAAATG | 55.13,55.13 | 152 |
| CakTSSR02628 | CakTC31457 | (TTC)5  | 909  | 923  | --         | Coactivatorp15 | ACAACTTACTGTCGTTGGAAA | ATTTCAAATCCTTCGTGAAAC  | 54.97,55.86 | 147 |
| CakTSSR02629 | CakTC31465 | (ATG)5  | 738  | 752  | --         | --             |                       |                        |             |     |
| CakTSSR02630 | CakTC31466 | (AC)8   | 1    | 16   | Young_pod  | --             |                       |                        |             |     |
| CakTSSR02631 | CakTC31467 | (GAC)5  | 824  | 838  | Young_pod  | --             | CACCAAGTGAGTCACCTAAAG | GTTTCAATCATCATCCTCTGA  | 54.97,55.09 | 149 |
| CakTSSR02632 | CakTC31481 | (GAG)6  | 717  | 734  | --         | C3H            | GGAAGCAGAAACAGTAGAGGT | TGTTCTCTCCTCTCTTAACC   | 55.29,55.2  | 165 |
| CakTSSR02633 | CakTC31486 | (AT)7   | 2904 | 2917 | --         | TPR            |                       |                        |             |     |
| CakTSSR02634 | CakTC31487 | (AG)10  | 1687 | 1706 | --         | CCAAT          |                       |                        |             |     |
| CakTSSR02635 | CakTC31488 | (TA)13  | 152  | 177  | --         | --             | TCCCCACCTAGCTTATACTTT | CGGATATAACTTTCGGGTAAT  | 54.83,55.03 | 161 |
| CakTSSR02636 | CakTC31492 | (AG)6   | 1439 | 1450 | --         | --             | CTAGCAGAAGATGAGCATGAG | TTCAAATTCAGAGACACTGCT  | 55.47,55.17 | 151 |
| CakTSSR02637 | CakTC31492 | (GATA)7 | 1607 | 1634 | --         | --             | AGTTAGTGGTGTGCTGAAGAA | ACATTGTAGGGTAGGTTAGC   | 55.12,54.99 | 142 |
| CakTSSR02638 | CakTC31497 | (ATT)6  | 1154 | 1171 | --         | MYB            | GCGTTTCCTATTTTAATTGTG | TTCTCGTACAATATTCCTCAA  | 54.35,54.94 | 147 |
| CakTSSR02639 | CakTC31505 | (GTT)5  | 1185 | 1199 | --         | --             | CCAATTTGATATCATCAAGGA | TAACGATAACTTCACCTCAA   | 55.09,55    | 140 |
| CakTSSR02640 | CakTC31512 | (GGC)5  | 637  | 651  | --         | --             | CAATTAGCGAGAGTGCAATAC | CACTGAACCAAGATCAACATC  | 55.34,55.56 | 150 |
| CakTSSR02641 | CakTC31537 | (TGG)5  | 742  | 756  | --         | --             | GATATGGTAGTGGTGGAGGAG | CATTCTAAGCTCAGGGGTAAT  | 56.05,55.2  | 177 |
| CakTSSR02642 | CakTC31541 | (CAA)5  | 463  | 477  | --         | --             | GAACCTCAACAAACAAAAGA  | TTTCATTGAGGTAAGGGATT   | 54.59,55.4  | 148 |
| CakTSSR02643 | CakTC31550 | (TTG)6  | 700  | 717  | --         | HB             | GAAATGCAACAGTCAAAAGAG | TGAATGTGGTTCTAAATGGAG  | 55.18,55.24 | 150 |
| CakTSSR02644 | CakTC31550 | (GAA)9  | 3311 | 3337 | --         | HB             |                       |                        |             |     |
| CakTSSR02645 | CakTC31551 | (GAG)5  | 1822 | 1836 | Flower bud | --             |                       |                        |             |     |
| CakTSSR02646 | CakTC31553 | (GTT)5  | 1136 | 1150 | --         | --             | ATTAGCTGCATAAAATGCTGT | TGGTCTTCCACATTTAGGATA  | 54.49,54.76 | 150 |
| CakTSSR02647 | CakTC31554 | (TCA)6  | 269  | 286  | --         | --             | CATGCCATACTCTTTGTTTC  | CATCAACAACAAGACAAGACA  | 54.99,54.63 | 156 |
| CakTSSR02648 | CakTC31555 | (CAC)5  | 425  | 439  | --         | --             | ACCCCTAATGCTACTAACACC | TTGGAAGAAGATGATTTGTGT  | 54.99,54.77 | 152 |
| CakTSSR02649 | CakTC31555 | (CCA)7  | 1831 | 1851 | --         | --             | ACATGGTGTGTTTCTCAAAG  | GAGAAGGTACTTCCCATTGTT  | 55.22,54.9  | 161 |
| CakTSSR02650 | CakTC31555 | (CTA)5  | 2816 | 2830 | --         | --             | GATGGGAAAACAACTCTTCT  | ACTACTTGAAGGCCAAGTCTC  | 55.03,55.29 | 164 |
| CakTSSR02651 | CakTC31557 | (CA)6   | 1342 | 1353 | --         | --             |                       |                        |             |     |
| CakTSSR02652 | CakTC31567 | (ATA)5  | 57   | 71   | --         | --             |                       |                        |             |     |
| CakTSSR02653 | CakTC31574 | (AGA)5  | 3103 | 3117 | --         | --             | CAAATTTGGGATCACACTAAG | GGAGACATGAAAACCAACTCT  | 54.84,55.79 | 147 |
| CakTSSR02654 | CakTC31575 | (AGA)6  | 12   | 29   | --         | --             |                       |                        |             |     |
| CakTSSR02655 | CakTC31576 | (AAG)6  | 1455 | 1472 | --         | --             | TTGTCAGAAGTTGATGGTTCT | GAATCAAAATCTAGCAGCTCA  | 54.83,54.94 | 149 |
| CakTSSR02656 | CakTC31594 | (CT)33  | 14   | 79   | --         | --             |                       |                        |             |     |
| CakTSSR02657 | CakTC31596 | (TTC)5  | 4098 | 4112 | --         | --             |                       |                        |             |     |
| CakTSSR02658 | CakTC31612 | (GA)20  | 2035 | 2074 | --         | --             |                       |                        |             |     |
| CakTSSR02659 | CakTC31615 | (TC)8   | 24   | 39   | Young_pod  | --             |                       |                        |             |     |
| CakTSSR02660 | CakTC31620 | (CAT)7  | 636  | 656  | --         | --             | TCAACACTCAAATTGATTTC  | GATACACTTCCCTGACCTTC   | 55.19,55.3  | 147 |

|              |            |           |      |      |            |           |                       |                        |             |     |
|--------------|------------|-----------|------|------|------------|-----------|-----------------------|------------------------|-------------|-----|
| CakTSSR02661 | CakTC31637 | (AAAT)5   | 756  | 775  | Flower bud | --        | AATTGCATAAGACTCCACAGA | TTAAACTCTTTAGGCCGATT   | 54.97,55.11 | 155 |
| CakTSSR02662 | CakTC31638 | (TAT)5    | 612  | 626  | --         | --        | TACACCTCATCAATCATAGGC | GAACATACTACGCAGCAAGC   | 55.18,54.7  | 149 |
| CakTSSR02663 | CakTC31643 | (AG)8     | 269  | 284  | --         | --        | CTTTGTGTGGAAATCACTGT  | TCAACTCCTTCACTTCAAAAA  | 55.22,55.16 | 158 |
| CakTSSR02664 | CakTC31643 | (TCT)6    | 481  | 498  | --         | --        | CTATCAATGATTTTGGTGTGG | GCAATGAAAAAGACAAAAAG   | 55.53,55.2  | 164 |
| CakTSSR02665 | CakTC31653 | (GA)6     | 1296 | 1307 | --         | --        |                       |                        |             |     |
| CakTSSR02666 | CakTC31655 | (TC)6     | 12   | 23   | --         | --        |                       |                        |             |     |
| CakTSSR02667 | CakTC31656 | (CTT)5    | 64   | 78   | --         | --        |                       |                        |             |     |
| CakTSSR02668 | CakTC31668 | (TTA)5    | 2457 | 2471 | --         | --        | GGGATTATCAGTTAAGCCTTT | AAAACCTTACAGGACTCGGAAT | 54.35,54.68 | 139 |
| CakTSSR02669 | CakTC31679 | (TA)7     | 1267 | 1280 | --         | --        | CTTCACAATTTTAACCAACGA | GCCAAGAAGAAAAGAAAAAGA  | 55.49,55.63 | 151 |
| CakTSSR02670 | CakTC31682 | (TTA)6    | 165  | 182  | --         | ARR-B     | CTTTTCCCCATTATTTTCCT  | GAGTGTGTTTGTGTGAGAAGC  | 54.94,55.07 | 143 |
| CakTSSR02671 | CakTC31683 | (CT)8     | 2168 | 2183 | Flower bud | --        | CAACATTGCAGAATTAAGGTT | AAACAGATAGCCATCACCATA  | 54.61,54.78 | 148 |
| CakTSSR02672 | CakTC31686 | (AT)6     | 7    | 18   | --         | --        |                       |                        |             |     |
| CakTSSR02673 | CakTC31693 | (AC)13    | 1328 | 1353 | --         | --        | TGTTACGTTTCAAGGAATGTT | GCCACCCATAAATGTATCT    | 54.91,55.7  | 145 |
| CakTSSR02674 | CakTC31696 | (ACC)5    | 377  | 391  | --         | --        | ACACAATTCATTGAAGCAGTT | TGGAAGTGAATGAGTATAGGC  | 54.88,54.49 | 140 |
| CakTSSR02675 | CakTC31696 | (TA)7     | 1296 | 1309 | --         | --        |                       |                        |             |     |
| CakTSSR02676 | CakTC31707 | (AT)6     | 2631 | 2642 | --         | bHLH      | TAATGGATGCTCCTTCTTTT  | CTATGGAATTTCTCATGGTTG  | 55.7,54.76  | 173 |
| CakTSSR02677 | CakTC31709 | (TTC)8    | 1143 | 1166 | --         | --        |                       |                        |             |     |
| CakTSSR02678 | CakTC31718 | (CCAACG)6 | 111  | 146  | --         | --        | TCTTCATCTCCATTCAAACAC | GTTGAGTAAGAGGAGCCAATC  | 55.18,55.62 | 153 |
| CakTSSR02679 | CakTC31719 | (AAC)5    | 317  | 331  | --         | --        | TCATCCTCAAATTATTCCTCA | GTAACCGGGTCTGATTTTAG   | 54.8,55.51  | 151 |
| CakTSSR02680 | CakTC31719 | (TC)13    | 967  | 992  | --         | --        |                       |                        |             |     |
| CakTSSR02681 | CakTC31728 | (GGT)5    | 856  | 870  | --         | --        | TAAGGGAGGTTATGGTCTAGG | ACCTCTCTCTCACAGTCTTC   | 55.06,55.06 | 147 |
| CakTSSR02682 | CakTC31736 | (CCA)5    | 490  | 504  | --         | --        | CAAATATTTTACCGACTGCAC | AGCCACATAAACATGGAGATA  | 55.04,54.78 | 150 |
| CakTSSR02683 | CakTC31739 | (AGA)5    | 148  | 162  | --         | MYB       | TTGCATCTCTGGATTATTAG  | GAGCAGGGTCAAGGTACTATT  | 54.61,55.1  | 154 |
| CakTSSR02684 | CakTC31741 | (TTC)7    | 506  | 526  | --         | --        | ATTTGAAGCTGTCTGTGAA   | TATCCTTAGGGAAACACCTC   | 55.18,54.99 | 152 |
| CakTSSR02685 | CakTC31742 | (GAA)6    | 108  | 125  | Flower bud | --        | TCGGTAGTGGAAATCATTTAG | CATTCTCTGTGGTTGATGAT   | 54.54,55.05 | 147 |
| CakTSSR02686 | CakTC31751 | (TC)8     | 35   | 50   | --         | --        |                       |                        |             |     |
| CakTSSR02687 | CakTC31756 | (AAT)5    | 305  | 319  | Flower bud | bZIP      | ATTGCTCAAGTTGTCAATGAT | TGTATTGCAGCTTCCTAACTC  | 54.79,54.9  | 148 |
| CakTSSR02688 | CakTC31758 | (TGT)6    | 509  | 526  | --         | AP2-EREBP | CCAATTCATCTGAGTCTTGAA | AAAATTGAAGTACCAATGCTG  | 55.36,54.61 | 148 |
| CakTSSR02689 | CakTC31774 | (AT)6     | 1    | 12   | Root       | --        |                       |                        |             |     |
| CakTSSR02690 | CakTC31789 | (TGA)6    | 842  | 859  | --         | --        | GACTTTTCACGTATGATGGAG | AATCAAAGAAGTTGCCTTTCT  | 54.8,54.96  | 181 |
| CakTSSR02691 | CakTC31793 | (ATC)5    | 91   | 105  | --         | --        |                       |                        |             |     |
| CakTSSR02692 | CakTC31795 | (AG)6     | 97   | 108  | --         | --        |                       |                        |             |     |
| CakTSSR02693 | CakTC31797 | (GA)8     | 72   | 87   | --         | --        |                       |                        |             |     |
| CakTSSR02694 | CakTC31798 | (ATA)6    | 2161 | 2178 | --         | --        | GGGAGGGAGATTTAATAATCA | ATTAATCTTGCTTGCTGCAT   | 54.87,55.24 | 207 |
| CakTSSR02695 | CakTC31803 | (TCC)5    | 148  | 162  | --         | Trihelix  | AACCTAGCTTCTCCAACATTC | TTGATAGGCTGTGATGAGATT  | 55.22,54.88 | 150 |
| CakTSSR02696 | CakTC31803 | (TGA)6    | 666  | 683  | --         | Trihelix  | ATAGGGGAAAGCGTAGTTTTA | ATAATTCTCTCCGCAAAATCT  | 54.99,54.85 | 157 |
| CakTSSR02697 | CakTC31810 | (GAA)6    | 1654 | 1671 | --         | --        |                       |                        |             |     |

|              |            |         |      |      |       |     |                        |                        |             |     |
|--------------|------------|---------|------|------|-------|-----|------------------------|------------------------|-------------|-----|
| CakTSSR02698 | CakTC31812 | (CAA)5  | 29   | 43   | --    | --  |                        |                        |             |     |
| CakTSSR02699 | CakTC31828 | (CT)6   | 14   | 25   | --    | --  |                        |                        |             |     |
| CakTSSR02700 | CakTC31844 | (AAG)5  | 152  | 166  | --    | --  | TCTCTAATTGACGCAGAGAAG  | CGATTTC AATTCTGTTTGC   | 55.02,55.95 | 147 |
| CakTSSR02701 | CakTC31846 | (ACA)5  | 648  | 662  | --    | --  | CAACAAGATTGTCGAGAAAAC  | GACAAATTGTTTTGTGTTC    | 55.02,54.7  | 146 |
| CakTSSR02702 | CakTC31846 | (TGG)5  | 1095 | 1109 | --    | --  | TATCAACAATCTATGCCAAT   | TTAGCATACCTCAATGACAGC  | 54.72,55.59 | 144 |
| CakTSSR02703 | CakTC31852 | (AT)11  | 190  | 211  | --    | --  | GCTAGGGATGCATCTAAAAGT  | ACCTTTCATGGGAAAAGTTAG  | 55.34,55.09 | 132 |
| CakTSSR02704 | CakTC31860 | (CTG)5  | 531  | 545  | Shoot | --  | TATGATAGTGATGGTGCTGGT  | AGCATTCTAAACAGTTCCAA   | 55.55,54.99 | 154 |
| CakTSSR02705 | CakTC31864 | (TCA)5  | 460  | 474  | --    | --  | TGCATTGAGTCTATTTTGGT   | TTTTGTTGTGAGGAAC TTGAT | 54.99,54.85 | 143 |
| CakTSSR02706 | CakTC31866 | (AG)18  | 2317 | 2352 | --    | --  | TTGTGGATCAGAGAGAAAAAG  | TTCACTCTGTGTTGATGATGA  | 54.65,54.91 | 169 |
| CakTSSR02707 | CakTC31868 | (CT)6   | 108  | 119  | Shoot | MYB | AAAGAAAAGGAGAAAGAACA   | AGAAGGAAGAAAGGATAAGG   | 54.94,55.77 | 138 |
| CakTSSR02708 | CakTC31874 | (TTA)5  | 1212 | 1226 | --    | --  | AGAGTGTGGGAATTGAGATT   | AGCCTTCTTCACATAAACACA  | 55.3,55.05  | 153 |
| CakTSSR02709 | CakTC31878 | (GA)11  | 1    | 22   | --    | --  |                        |                        |             |     |
| CakTSSR02710 | CakTC31910 | (TGA)6  | 4805 | 4822 | --    | SAP |                        |                        |             |     |
| CakTSSR02711 | CakTC31931 | (TA)6   | 202  | 213  | --    | --  | TGACTACTTTTAACATGGGACA | TTAACAGCCACAACCTCTTAC  | 54.94,54.66 | 158 |
| CakTSSR02712 | CakTC31936 | (TTA)5  | 1183 | 1197 | --    | TCP | TAGTATCCGCAATGTCAGTGT  | CGAAGAATACCACAACAATT   | 55.8,54.45  | 151 |
| CakTSSR02713 | CakTC31936 | (TGG)5  | 1764 | 1778 | --    | TCP | GTTGTTTCTCCCATTTTCTT   | ATATAGAACCCAGAGCAGAGC  | 55.04,55.33 | 157 |
| CakTSSR02714 | CakTC31949 | (AAC)5  | 48   | 62   | --    | --  |                        |                        |             |     |
| CakTSSR02715 | CakTC31979 | (CA)7   | 232  | 245  | --    | --  | TTAAGCTCCCAAACCAATTAT  | GCTATGAAGGCCTTATCAAGT  | 55.59,55.34 | 158 |
| CakTSSR02716 | CakTC32003 | (TTC)10 | 54   | 83   | --    | HB  |                        |                        |             |     |
| CakTSSR02717 | CakTC32005 | (TA)6   | 48   | 59   | --    | --  |                        |                        |             |     |
| CakTSSR02718 | CakTC32006 | (AAT)5  | 585  | 599  | --    | --  |                        |                        |             |     |
| CakTSSR02719 | CakTC32010 | (CAG)5  | 1224 | 1238 | --    | --  | ATCAACAGCATTCTCAACAAC  | CACATGTCCAATACCACCTAT  | 55.29,54.8  | 155 |
| CakTSSR02720 | CakTC32010 | (AT)6   | 3551 | 3562 | --    | --  | GTCGGGTAGTCATAGGTCTTT  | TGTGCTTAATGGATAAGGTTG  | 54.94,55.44 | 193 |
| CakTSSR02721 | CakTC32014 | (TGA)5  | 385  | 399  | --    | --  | TGTCAATGATGATGTTGAAGA  | TCTAACCAATGGGTGTCTAAA  | 54.91,54.84 | 160 |
| CakTSSR02722 | CakTC32021 | (TC)12  | 15   | 38   | --    | --  |                        |                        |             |     |
| CakTSSR02723 | CakTC32035 | (AAT)5  | 250  | 264  | Shoot | --  | CATCCTCTTCTCATCTACACC  | GACCGAATAAGGAGGAGAAT   | 55.48,54.89 | 159 |
| CakTSSR02724 | CakTC32035 | (GTG)5  | 512  | 526  | Shoot | --  | AAAGTTCCAATTCGATCAGAC  | TTCAATTCTCCATCATCAAC   | 55.87,55.11 | 152 |
| CakTSSR02725 | CakTC32035 | (ATG)5  | 935  | 949  | Shoot | --  | CGGAAGAAATAGTGAATGTTG  | TCCTCCACTAGTCAAAAACA   | 55,55.03    | 151 |
| CakTSSR02726 | CakTC32051 | (TTC)6  | 1627 | 1644 | --    | --  |                        |                        |             |     |
| CakTSSR02727 | CakTC32066 | (ATC)5  | 231  | 245  | --    | --  | AAGACCAGGAAGAGAGAGAAA  | GAAAAAGTGAGACCCAGAAAT  | 54.89,55.03 | 149 |
| CakTSSR02728 | CakTC32074 | (AT)6   | 2232 | 2243 | --    | --  | GCTGACAAAAATTTTCAACG   | ATGCTTTTACCAAACCACTTA  | 55.16,54.24 | 134 |
| CakTSSR02729 | CakTC32077 | (TCT)6  | 136  | 153  | --    | --  | CGAAACGACCATCTCTACTAA  | AAAACTACCGGGAGAGTAAC   | 54.75,54.24 | 152 |
| CakTSSR02730 | CakTC32077 | (CAA)5  | 465  | 479  | --    | --  | AAGAACAAATCAGATCCCAAT  | TTGAAGTGGTTACCAGGACTA  | 55.23,54.9  | 150 |
| CakTSSR02731 | CakTC32089 | (GTA)5  | 821  | 835  | --    | --  | GTTATGTGACGGAATCGTCTA  | ACGAATTCTTTTACCCACTT   | 55.26,54.71 | 150 |
| CakTSSR02732 | CakTC32095 | (ATC)8  | 1    | 24   | --    | --  |                        |                        |             |     |
| CakTSSR02733 | CakTC32101 | (TA)6   | 1141 | 1152 | --    | --  | TTAGTTTGGGTCTGTGAGAAA  | GTGTTGTGAGTGAGAGAAAGG  | 55.03,54.89 | 156 |
| CakTSSR02734 | CakTC32111 | (CT)6   | 2    | 13   | --    | --  |                        |                        |             |     |

|              |            |        |      |      |            |             |                        |                        |             |     |
|--------------|------------|--------|------|------|------------|-------------|------------------------|------------------------|-------------|-----|
| CakTSSR02735 | CakTC32111 | (AG)7  | 323  | 336  | --         | --          | TTGGTTTTTCAATCACTCTCTA | TTTGAGATAAGCACCCCAAGTA | 54.97,55.16 | 152 |
| CakTSSR02736 | CakTC32111 | (AT)9  | 1390 | 1407 | --         | --          | CTACTTCTTGCCTAACCAACGA | TTTAGTCATGTATGGCCTTGT  | 54.99,54.86 | 144 |
| CakTSSR02737 | CakTC32122 | (ATA)5 | 7    | 21   | --         | WRKY        |                        |                        |             |     |
| CakTSSR02738 | CakTC32132 | (AG)6  | 401  | 412  | Root       | --          | ATTACCCTCTCTGGTTTT     | AGGCAACCTTATTGATTGAA   | 54.53,54.9  | 162 |
| CakTSSR02739 | CakTC32132 | (TCT)5 | 688  | 702  | Root       | --          | ATGAATTACCACCTCCAATC   | GTCCTGTTATGGTTATTGCTG  | 55.58,54.86 | 156 |
| CakTSSR02740 | CakTC32139 | (TCT)5 | 67   | 81   | --         | --          |                        |                        |             |     |
| CakTSSR02741 | CakTC32139 | (CCA)5 | 718  | 732  | --         | --          | TCTCATTTTCAGCATTTTGTG  | TTGAAGAATGCTGTGAGTTTT  | 55.52,55.18 | 157 |
| CakTSSR02742 | CakTC32140 | (AAT)6 | 195  | 212  | --         | --          | ATCCTAATGCATCATGTTCA   | GAAGTTGAGAAGAAGATGGT   | 55.18,55.01 | 180 |
| CakTSSR02743 | CakTC32143 | (TTA)5 | 21   | 35   | Root       | --          |                        |                        |             |     |
| CakTSSR02744 | CakTC32145 | (TTG)5 | 4809 | 4823 | --         | --          | TGTTTGTGTTTGTGTTGTTGT  | TTTTGGTTACCCTTTTCTTC   | 54.94,55.22 | 150 |
| CakTSSR02745 | CakTC32147 | (TC)11 | 656  | 677  | --         | --          |                        |                        |             |     |
| CakTSSR02746 | CakTC32148 | (AGT)5 | 375  | 389  | --         | MYB         | GAAGATTCAATCCATCATCAA  | CACCACCTTCAATATTGTCAT  | 55.02,54.93 | 150 |
| CakTSSR02747 | CakTC32148 | (TAT)5 | 614  | 628  | --         | MYB         | GGCAAATATGGTTGTGAGTA   | CAACAACAAGCACGTAATAGA  | 55.27,54.16 | 149 |
| CakTSSR02748 | CakTC32157 | (TGT)5 | 1677 | 1691 | --         | TCP         | TTGGCATACGTATCTTCTTC   | AAACAACCTAACGCCGTAAC   | 54.68,54.51 | 153 |
| CakTSSR02749 | CakTC32166 | (TC)6  | 1573 | 1584 | --         | --          | CTAGATTTTGATTGTGCCAAG  | GTAACAAGCCCCAAGTTTAG   | 55.16,55.73 | 164 |
| CakTSSR02750 | CakTC32167 | (AG)6  | 933  | 944  | --         | --          | TACCAAAGAATGATGGAAGAA  | TTTGCTTCATAATCCATAACC  | 54.89,54.47 | 149 |
| CakTSSR02751 | CakTC32172 | (TTC)5 | 314  | 328  | --         | MYB-related | GAAATCTTCGGTGTAGGTT    | CAAGGTGAACGAGGATTAAG   | 55.08,54.81 | 144 |
| CakTSSR02752 | CakTC32176 | (TAT)5 | 1840 | 1854 | --         | --          |                        |                        |             |     |
| CakTSSR02753 | CakTC32177 | (TA)6  | 150  | 161  | --         | --          | TTTGTAAGAAGTTCCGTTTG   | TGGGTTAGGTCCACTTACTTT  | 54.82,55.43 | 231 |
| CakTSSR02754 | CakTC32181 | (TCT)5 | 1150 | 1164 | --         | --          | TTGAGTGTGTGTGAGATGTGT  | TCATCACCTACCAATCTCTG   | 54.79,55.23 | 159 |
| CakTSSR02755 | CakTC32189 | (AT)6  | 130  | 141  | --         | --          | CAGTGCTTGTGCTCTTACT    | TGTTTGTGACAATGGAGTACA  | 55.04,54.95 | 144 |
| CakTSSR02756 | CakTC32192 | (GT)6  | 127  | 138  | --         | --          | AAACCTTTGCTTGTGATAGTG  | CCGAAAGAGAAAGATGAAGAT  | 54.66,55.27 | 159 |
| CakTSSR02757 | CakTC32200 | (TGG)5 | 931  | 945  | --         | Trihelix    | GTGGACTGATAAGATGGTGAG  | CAGCCATAACCTTTGATACAG  | 54.6,55.04  | 155 |
| CakTSSR02758 | CakTC32202 | (TAG)7 | 1023 | 1043 | --         | --          | AATCGTTTTTGGACTATGGAC  | CACAATCCTACGGTTACAGAT  | 55.74,54.28 | 152 |
| CakTSSR02759 | CakTC32218 | (CT)8  | 261  | 276  | --         | --          | AGTTATGTGCAACTACCAAC   | GGAGGAGGAGAAAAGATAACA  | 55.24,55.12 | 153 |
| CakTSSR02760 | CakTC32219 | (ATT)5 | 446  | 460  | --         | HB          | AGAGCAACTGTTGTTGTTGT   | TTATCAACGGTGGAACCTAAA  | 55.03,55.02 | 149 |
| CakTSSR02761 | CakTC32219 | (ATT)5 | 744  | 758  | --         | HB          | CACGGAAATTTTGTCTTAAG   | GAAGAAACAACAAAGCAAAAG  | 54.38,54.53 | 165 |
| CakTSSR02762 | CakTC32223 | (TTC)6 | 1493 | 1510 | --         | --          | CTTCTGAGGTGAGACGTATTG  | CACAAAACAACCTCCCTTGTA  | 55.05,55.4  | 144 |
| CakTSSR02763 | CakTC32225 | (GAA)5 | 258  | 272  | Flower bud | --          | CAGGAGGAGTTTTCAAGAAT   | TACCTCTCCCTCAATCTCTC   | 55.2,55.1   | 150 |
| CakTSSR02764 | CakTC32226 | (GTG)6 | 846  | 863  | --         | --          | GCAGGTAATCAGTTGTCAAG   | TTCTTCTACCACTCTCCATCA  | 55.05,54.92 | 149 |
| CakTSSR02765 | CakTC32238 | (CTT)6 | 835  | 852  | Root       | --          | CTCCACCTCTAATCGGTTATT  | GTTGTTTTGTGCTTCTAAAGG  | 55.04,54.41 | 143 |
| CakTSSR02766 | CakTC32245 | (CT)9  | 17   | 34   | --         | --          |                        |                        |             |     |
| CakTSSR02767 | CakTC32248 | (TG)6  | 873  | 884  | --         | --          |                        |                        |             |     |
| CakTSSR02768 | CakTC32250 | (AG)9  | 196  | 213  | --         | --          | GTCTTGTTTTGTGGTTCAAAG  | ATGTCAACCCTTGAAAGAAAT  | 54.94,55.31 | 169 |
| CakTSSR02769 | CakTC32261 | (CT)20 | 113  | 152  | --         | --          | TTCATGTAAAAACCAACATC   | AAAGTGGGGTGTGTATTGTA   | 55.08,54.63 | 155 |
| CakTSSR02770 | CakTC32264 | (TGT)5 | 1163 | 1177 | --         | --          | TAGGGTTTTGTTGAAGATTGA  | GATGCAAGAACAAACAACAAAG | 54.97,55.97 | 164 |
| CakTSSR02771 | CakTC32264 | (AG)12 | 1363 | 1386 | --         | --          | CGAATCAAGAGAGAGGAAAAG  | GAGTGATGACAGGAACACAAT  | 55.92,54.93 | 169 |

|              |            |          |      |      |             |      |                        |                        |             |     |
|--------------|------------|----------|------|------|-------------|------|------------------------|------------------------|-------------|-----|
| CakTSSR02772 | CakTC32265 | (AG)6    | 115  | 126  | --          | --   | GTAACAAGCCCCAAGTTTTTA  | TTTCAAGGGAACACATCTC    | 56.11,55.17 | 151 |
| CakTSSR02773 | CakTC32270 | (TAAT)6  | 1650 | 1673 | --          | --   |                        |                        |             |     |
| CakTSSR02774 | CakTC32272 | (AAC)6   | 145  | 162  | --          | WRKY | GCGTTTGATAGTTCTGTGAAT  | TCCAAAGTACAGACCTTGATG  | 54.56,55.31 | 148 |
| CakTSSR02775 | CakTC32273 | (AGAA)5  | 6    | 25   | --          | --   |                        |                        |             |     |
| CakTSSR02776 | CakTC32273 | (AAC)5   | 223  | 237  | --          | --   | AAACGTTCAAGAAAACCTTCTT | CAAAAAACAGAGGAAAACAGAA | 54.88,54.77 | 147 |
| CakTSSR02777 | CakTC32273 | (TCT)7   | 3151 | 3171 | --          | --   |                        |                        |             |     |
| CakTSSR02778 | CakTC32280 | (TTC)6   | 186  | 203  | --          | --   | TGGCTGTTCTTCTTCTCTTA   | TGTCACAATCTTTGAGGTTCT  | 54.59,54.83 | 152 |
| CakTSSR02779 | CakTC32283 | (AACA)6  | 381  | 404  | Flower bud  | --   | GCCTACAATTGGAAACCTAC   | AAGCTCAAGGGATCTCATTAC  | 55.5,55.14  | 146 |
| CakTSSR02780 | CakTC32284 | (AAC)5   | 127  | 141  | --          | --   | CTCTCAAAACGCTAAAAATCAA | CGAAATGATGATAAAGCAAAAG | 55.05,55.25 | 145 |
| CakTSSR02781 | CakTC32294 | (AG)11   | 1144 | 1165 | --          | C3H  | GATCCAAGAATGGAATAACC   | TCTCTCATCTCTTTCTTTCC   | 55.16,55.23 | 148 |
| CakTSSR02782 | CakTC32301 | (TC)6    | 851  | 862  | --          | --   | CCTGTACAGAGTTTCTTCCAA  | CACGATTGCTAAGGAGAATA   | 54.61,54.85 | 150 |
| CakTSSR02783 | CakTC32304 | (GAA)6   | 520  | 537  | --          | --   | TCTAGACTCATCCAAAGCAGA  | TTGATGTTGTTCAAGAGGATT  | 55.26,54.77 | 140 |
| CakTSSR02784 | CakTC32307 | (TTA)6   | 408  | 425  | --          | --   | GTAGCAGCATCAGTTCATCAT  | TAGAGAGAGAAAGTGGTCCAA  | 55.41,54.22 | 154 |
| CakTSSR02785 | CakTC32314 | (TCT)10  | 46   | 75   | --          | --   |                        |                        |             |     |
| CakTSSR02786 | CakTC32315 | (TAA)5   | 1529 | 1543 | --          | --   | ATTGAGGGATTTCATATTGCT  | GTTCAGATAACTTGCCAAAAT  | 55.35,53.7  | 147 |
| CakTSSR02787 | CakTC32316 | (GAT)6   | 683  | 700  | --          | --   | TCTGTTTCTTGTGATTAGGG   | CCCAATCCTAATCTCTTCAAT  | 54.55,54.93 | 149 |
| CakTSSR02788 | CakTC32317 | (TC)6    | 136  | 147  | --          | --   | CAAAGTAACACTCACAGCACA  | GAGAGAGAAAGAGGGAGTGAG  | 54.94,54.87 | 135 |
| CakTSSR02789 | CakTC32320 | (AAG)5   | 816  | 830  | --          | --   | AATTCTCCACCTTCATATTCC  | TGGAGAAGTATCTTGAGGTGA  | 54.76,54.92 | 154 |
| CakTSSR02790 | CakTC32323 | (AT)9    | 407  | 424  | --          | --   | TATTTTAGCAGCTTCGTTGAC  | ACTAACGAAAACAAGAAATGC  | 55.08,53.95 | 194 |
| CakTSSR02791 | CakTC32323 | (CTT)5   | 1676 | 1690 | --          | --   | GTTAAGGCATAACCAACAACA  | ATTTGAATCAGGGGTATTTTC  | 55.35,54.79 | 146 |
| CakTSSR02792 | CakTC32330 | (AAG)5   | 4004 | 4018 | --          | --   | TTCTTCACGATTATTGTGCTT  | CACTCCATAGTTCATTTCGAG  | 55.15,54.98 | 147 |
| CakTSSR02793 | CakTC32338 | (AAC)5   | 270  | 284  | --          | --   | AACTTGATCATGCATTTCACT  | GTTTGCAACATTTGATATTGG  | 54.79,55.68 | 157 |
| CakTSSR02794 | CakTC32340 | (CCG)6   | 222  | 239  | Young_pod   | --   | CGTTACAAAACAACAACAACA  | ATAGTCTCTCGGCATTGTTTA  | 54.82,54.27 | 151 |
| CakTSSR02795 | CakTC32348 | (CCA)6   | 3717 | 3734 | --          | --   | CACAATGTTTGAGAAGAATCC  | GTACGACATGGATCAGAGGTA  | 54.77,55.08 | 150 |
| CakTSSR02796 | CakTC32354 | (AT)10   | 2275 | 2294 | --          | --   |                        |                        |             |     |
| CakTSSR02797 | CakTC32357 | (AC)8    | 583  | 598  | --          | --   |                        |                        |             |     |
| CakTSSR02798 | CakTC32366 | (GT)12   | 4192 | 4215 | --          | --   |                        |                        |             |     |
| CakTSSR02799 | CakTC32376 | (TTTTA)5 | 26   | 50   | --          | --   |                        |                        |             |     |
| CakTSSR02800 | CakTC32388 | (AG)6    | 24   | 35   | --          | --   |                        |                        |             |     |
| CakTSSR02801 | CakTC32389 | (CTT)8   | 51   | 74   | --          | --   |                        |                        |             |     |
| CakTSSR02802 | CakTC32400 | (TC)11   | 30   | 51   | --          | --   |                        |                        |             |     |
| CakTSSR02803 | CakTC32412 | (GT)6    | 2219 | 2230 | --          | --   |                        |                        |             |     |
| CakTSSR02804 | CakTC32416 | (AAC)5   | 163  | 177  | --          | --   | GTTCAGCTAAAACATCGAACA  | CAAAACAACCTTAATTGGTG   | 55.63,54.95 | 150 |
| CakTSSR02805 | CakTC32429 | (CTT)6   | 202  | 219  | --          | --   | TTTCTGCTCACTTGATCTTC   | ATTGTTGTCCACATTTCAATC  | 54.8,54.88  | 148 |
| CakTSSR02806 | CakTC32453 | (TC)6    | 604  | 615  | --          | --   |                        |                        |             |     |
| CakTSSR02807 | CakTC32456 | (TGA)7   | 1945 | 1965 | --          | --   | CAATACTGCATTCAAGAAAAC  | ATCTTTGGTTCTGAGAAGGAC  | 54.99,55.01 | 148 |
| CakTSSR02808 | CakTC32460 | (TTC)5   | 104  | 118  | Mature Leaf | --   | CCTTCCACATGCTAAATATGA  | TTGATAGGAGTTGGGGTAAT   | 55.36,55.28 | 151 |

|              |            |           |      |      |             |      |                        |                       |             |     |
|--------------|------------|-----------|------|------|-------------|------|------------------------|-----------------------|-------------|-----|
| CakTSSR02809 | CakTC32461 | (TTC)9    | 1313 | 1339 | --          | MYB  | TGCTATTGTGATTGAGTTTCT  | AGCATGACAAGTTTAAAAGCA | 54.97,55.39 | 147 |
| CakTSSR02810 | CakTC32464 | (GGT)5    | 14   | 28   | Mature Leaf | --   |                        |                       |             |     |
| CakTSSR02811 | CakTC32466 | (GCC)5    | 246  | 260  | --          | --   | CAAAGCCACCACCTTAC      | ATTGGAGGTGGTATAGGAAA  | 56.49,55.28 | 154 |
| CakTSSR02812 | CakTC32488 | (GGA)5    | 1016 | 1030 | --          | TCP  | TCCAAACGAATAACCTAACAA  | GTCTTCTTTTCTTCCCATGT  | 55.02,55.03 | 153 |
| CakTSSR02813 | CakTC32488 | (CTT)8    | 1662 | 1685 | --          | TCP  | TCGACATGATAACACAAGTCA  | TAAGATCAAAACAACTCACG  | 55.04,55.48 | 160 |
| CakTSSR02814 | CakTC32494 | (GA)6     | 13   | 24   | --          | C3H  |                        |                       |             |     |
| CakTSSR02815 | CakTC32495 | (CT)10    | 8    | 27   | --          | --   |                        |                       |             |     |
| CakTSSR02816 | CakTC32496 | (TTC)6    | 603  | 620  | --          | LOB  | TCATCAATGCCTAATCAACT   | GAAGCAGAAGATGAAGACAAA | 54.91,54.8  | 131 |
| CakTSSR02817 | CakTC32502 | (AAT)5    | 14   | 28   | --          | --   |                        |                       |             |     |
| CakTSSR02818 | CakTC32522 | (TCA)5    | 281  | 295  | --          | --   | CAGAATGCTGAAGTCAAAGTC  | CAGATACCCATAACAAATCCA | 55.17,55.05 | 176 |
| CakTSSR02819 | CakTC32533 | (AC)8     | 187  | 202  | --          | --   | TTCTTGAGTTGAAAAATGAGC  | ATTAATCAACCCCAAGATGT  | 54.83,55.12 | 167 |
| CakTSSR02820 | CakTC32535 | (GAATTA)5 | 1793 | 1822 | --          | --   | AGTAAAAACCTTTGCGAGATT  | CAATCAACCACCTTATTCATC | 55.01,54.58 | 149 |
| CakTSSR02821 | CakTC32567 | (TTG)5    | 10   | 24   | --          | HB   |                        |                       |             |     |
| CakTSSR02822 | CakTC32573 | (TTC)6    | 140  | 157  | --          | --   | GAGAGAGATTGGGGTGATAC   | CTGATCATGGATCCTACCATA | 55.22,54.94 | 149 |
| CakTSSR02823 | CakTC32573 | (ATT)7    | 503  | 523  | --          | --   |                        |                       |             |     |
| CakTSSR02824 | CakTC32576 | (ATT)16   | 2243 | 2290 | --          | --   |                        |                       |             |     |
| CakTSSR02825 | CakTC32588 | (TAT)5    | 575  | 589  | --          | --   |                        |                       |             |     |
| CakTSSR02826 | CakTC32595 | (CAC)6    | 1400 | 1417 | --          | --   | TCCACCTTCATAAGCATAACAC | ATGGAAGTTTAAATCGTAGCC | 55.26,55.2  | 149 |
| CakTSSR02827 | CakTC32595 | (ATT)15   | 1821 | 1865 | --          | --   | TAGGGTGGATAATAGGGTTGT  | TATTCTCCATACCCTCCTCAT | 55.16,55.2  | 173 |
| CakTSSR02828 | CakTC32614 | (CT)11    | 1    | 22   | --          | --   |                        |                       |             |     |
| CakTSSR02829 | CakTC32626 | (GAT)7    | 3684 | 3704 | --          | --   | TCTCCTGTTGAAATTGATGAG  | CCCAATTTCACATCATGTACT | 55.36,54.93 | 152 |
| CakTSSR02830 | CakTC32627 | (AAC)5    | 221  | 235  | --          | --   | TACCCTTTCGCTTTCTTCT    | AAAAGGGGTGAACGAGAATT  | 54.97,54.71 | 152 |
| CakTSSR02831 | CakTC32630 | (GA)9     | 541  | 558  | --          | --   | TCAAAAGTGCGAATAACTAGC  | TCCATCTGTCTCTCTTCAA   | 55.08,55.06 | 150 |
| CakTSSR02832 | CakTC32631 | (AGA)6    | 2068 | 2085 | --          | --   | CGTGTGAATGGATAGATGAGA  | CCACTCACTTACTACTCCAG  | 56.13,54.94 | 158 |
| CakTSSR02833 | CakTC32641 | (GAT)5    | 407  | 421  | --          | --   | GATATTGATGAAAGCGATGAC  | ATGATCTTCCTCATCATCCTC | 54.81,55.55 | 186 |
| CakTSSR02834 | CakTC32642 | (TCA)5    | 1892 | 1906 | --          | --   | TTATTTTCACTACCACCCAAA  | GTTGTGGAATTTTATGCAAG  | 54.87,55.01 | 145 |
| CakTSSR02835 | CakTC32666 | (TGA)7    | 238  | 258  | Young_pod   | --   | CTCGTTTAGAGGAACAAACAA  | ATCTTTCTCAAGCTGTTCCCT | 54.8,54.94  | 147 |
| CakTSSR02836 | CakTC32670 | (CAT)6    | 797  | 814  | --          | --   | ATCAGCTTCAACATTCAAATC  | TTCTAGCAGTACTTCAAACG  | 54.44,54.99 | 148 |
| CakTSSR02837 | CakTC32671 | (TTC)8    | 2057 | 2080 | Root        | --   | ACGTCCTCTTTTACACATCA   | TGATGAAGGAAGGTAGATTTG | 54.89,54.47 | 152 |
| CakTSSR02838 | CakTC32671 | (AT)13    | 2214 | 2239 | Root        | --   | ATCAGATCCTCGACTACCTTC  | GATCTGAACACCTTCCCTATT | 54.96,54.82 | 143 |
| CakTSSR02839 | CakTC32675 | (TC)12    | 616  | 639  | --          | --   |                        |                       |             |     |
| CakTSSR02840 | CakTC32681 | (TAC)6    | 2362 | 2379 | Shoot       | --   | TTTGAAGCTACGAAGAAGATG  | TTCTTCACAAAGCAACAATG  | 55.04,54.91 | 148 |
| CakTSSR02841 | CakTC32682 | (CT)6     | 1    | 12   | --          | TRAF |                        |                       |             |     |
| CakTSSR02842 | CakTC32682 | (CAT)5    | 303  | 317  | --          | TRAF | CAACCATCTTTTGAGTTCATC  | TGGTTGAGGAAGTTATGTTGT | 54.77,54.72 | 150 |
| CakTSSR02843 | CakTC32694 | (CT)7     | 1391 | 1404 | --          | --   |                        |                       |             |     |
| CakTSSR02844 | CakTC32695 | (AGA)5    | 846  | 860  | --          | HB   | CATTTGTTGATGGTATTGCTT  | AATAGTGTGCTGATGCTGAT  | 55.27,54.99 | 145 |
| CakTSSR02845 | CakTC32701 | (TGATTT)6 | 1862 | 1897 | --          | --   | TGATTCTGATTGTGATTGTGA  | AAAGGGTCAGAGGTAGAACAC | 54.91,54.96 | 152 |

|              |            |          |      |      |    |             |                        |                        |             |     |
|--------------|------------|----------|------|------|----|-------------|------------------------|------------------------|-------------|-----|
| CakTSSR02846 | CakTC32718 | (ATT)6   | 350  | 367  | -- | --          | CCATAAACATCGTAAGCTTTG  | CTAGCTGTTCAAGTTGGATTG  | 55.21,55.23 | 159 |
| CakTSSR02847 | CakTC32729 | (AAT)9   | 2045 | 2071 | -- | --          | AATAAGCAGTGTGATCCAA    | ACTGTCAACTTCACCTTCCAA  | 54.97,54.92 | 143 |
| CakTSSR02848 | CakTC32749 | (TC)7    | 2    | 15   | -- | --          |                        |                        |             |     |
| CakTSSR02849 | CakTC32749 | (AAC)5   | 613  | 627  | -- | --          | ACAATAACCAGAACACATGC   | TTTTGTCCTTGTGTGATGATTC | 55.17,55.19 | 142 |
| CakTSSR02850 | CakTC32749 | (GGA)7   | 1522 | 1542 | -- | --          | CAGGTATGATGAACAATGGAT  | TCATCATTGACATGTTGTTTC  | 54.85,54.28 | 171 |
| CakTSSR02851 | CakTC32759 | (GAT)5   | 531  | 545  | -- | --          |                        |                        |             |     |
| CakTSSR02852 | CakTC32763 | (TTC)5   | 17   | 31   | -- | --          |                        |                        |             |     |
| CakTSSR02853 | CakTC32764 | (TC)11   | 19   | 40   | -- | --          |                        |                        |             |     |
| CakTSSR02854 | CakTC32771 | (GAA)5   | 94   | 108  | -- | --          |                        |                        |             |     |
| CakTSSR02855 | CakTC32776 | (AGA)6   | 590  | 607  | -- | --          |                        |                        |             |     |
| CakTSSR02856 | CakTC32781 | (GA)12   | 514  | 537  | -- | --          | TGGTGAAGAGAGAGAAAGTGA  | ATTCGAGCAAGATTCTTCATT  | 55.13,55.7  | 149 |
| CakTSSR02857 | CakTC32793 | (ATC)5   | 112  | 126  | -- | --          | TCAATATCTTTCCTTCCAACA  | GGAAATTCTGATGCATCTTC   | 54.89,54.73 | 147 |
| CakTSSR02858 | CakTC32797 | (CAA)5   | 58   | 72   | -- | TPR         |                        |                        |             |     |
| CakTSSR02859 | CakTC32802 | (CT)6    | 1589 | 1600 | -- | --          | TATAAGCATTCTCCGGTTATG  | GGCTACTGAAGAACAAATTCA  | 54.68,54.7  | 157 |
| CakTSSR02860 | CakTC32803 | (AGC)5   | 1385 | 1399 | -- | --          | AAGCAAGATGAAGGAACTCTT  | TTATCCAGATCAGAATCAACG  | 54.94,55.32 | 158 |
| CakTSSR02861 | CakTC32816 | (TTC)5   | 71   | 85   | -- | --          |                        |                        |             |     |
| CakTSSR02862 | CakTC32818 | (TTG)6   | 281  | 298  | -- | --          | AAGTACGACGATGTTGTGTGTC | ACTTCAATTTTGTGTGTGG    | 55.24,55.23 | 160 |
| CakTSSR02863 | CakTC32818 | (AG)8    | 472  | 487  | -- | --          |                        |                        |             |     |
| CakTSSR02864 | CakTC32830 | (AAG)6   | 47   | 64   | -- | --          |                        |                        |             |     |
| CakTSSR02865 | CakTC32830 | (AAG)5   | 1141 | 1155 | -- | --          | CACACAGACCAAGTGCAATA   | ATCATTTGGGACTACGACTCT  | 54.49,55.33 | 155 |
| CakTSSR02866 | CakTC32840 | (TC)10   | 358  | 377  | -- | --          | GGTTTGTCTTGATCTTTCT    | TAAACTTGCATCATTTGCTC   | 55.03,55.71 | 158 |
| CakTSSR02867 | CakTC32868 | (CAA)5   | 1326 | 1340 | -- | --          | TTGGATTTTATCCAGCTCAG   | ATTGTTGGTTACTGTCTGTGG  | 55.47,55.08 | 149 |
| CakTSSR02868 | CakTC32878 | (TTCTG)6 | 565  | 594  | -- | --          |                        |                        |             |     |
| CakTSSR02869 | CakTC32879 | (TA)10   | 411  | 430  | -- | --          |                        |                        |             |     |
| CakTSSR02870 | CakTC32884 | (TC)7    | 219  | 232  | -- | TPR         | TTCTCTCAAACATGCTTTTC   | ATCGTATTGTGAAAGGGTTT   | 54.83,55.35 | 153 |
| CakTSSR02871 | CakTC32901 | (AG)9    | 2861 | 2878 | -- | FHA         |                        |                        |             |     |
| CakTSSR02872 | CakTC32905 | (TGA)6   | 2795 | 2812 | -- | FAR1        | CTTTATCATGTTACCAGAGG   | TAATCTCTTCTCCACCCTTT   | 54.82,54.74 | 157 |
| CakTSSR02873 | CakTC32914 | (CTT)6   | 3906 | 3923 | -- | WI/SNF-BAF6 | TCITTTATCTTGTGAAAACCA  | CAAGAGCAAGAACAAGAAGAG  | 55.29,54.64 | 149 |
| CakTSSR02874 | CakTC32937 | (TC)10   | 223  | 242  | -- | --          | TACTGTTTCTGCGATCACTT   | GAGTTTGTGCACTTCCATAG   | 55.22,55.05 | 144 |
| CakTSSR02875 | CakTC32939 | (AG)10   | 56   | 75   | -- | --          |                        |                        |             |     |
| CakTSSR02876 | CakTC32947 | (TC)8    | 19   | 34   | -- | --          |                        |                        |             |     |
| CakTSSR02877 | CakTC32962 | (TGC)5   | 2618 | 2632 | -- | Alfin-like  | ATTTTCTTCGGTTTGTAGTCT  | TCATAATTCCGAAAACGATAG  | 54.8,54.64  | 154 |
| CakTSSR02878 | CakTC32962 | (GA)9    | 2855 | 2872 | -- | Alfin-like  | GAGAGAGAGTAGGGTTTGGGA  | CGTCACATTTTCTGAGCTAGT  | 55.18,54.8  | 150 |
| CakTSSR02879 | CakTC32963 | (CAG)5   | 2901 | 2915 | -- | --          | ATGTCCCAAGGACTTCTCTC   | AGATCTCTGGAACGTGGATT   | 55.7,55.29  | 150 |
| CakTSSR02880 | CakTC32991 | (CTA)5   | 153  | 167  | -- | --          | ACCCTTTTGTTCAGAAAGT    | AATTGTTGGCTCAATAGTTGT  | 54.73,54.02 | 147 |
| CakTSSR02881 | CakTC32992 | (TA)6    | 4113 | 4124 | -- | --          | TCCACTTGAGAAGTTGGTAAA  | CTACAACCTTTCCCTGAACT   | 55.03,55.15 | 146 |
| CakTSSR02882 | CakTC33002 | (CTT)8   | 237  | 260  | -- | HB          | GATGATTCAACATGGGAATA   | TCTTGGGACATAGAATTGAA   | 54.92,54.89 | 149 |

|              |            |         |      |      |             |      |                        |                         |             |     |
|--------------|------------|---------|------|------|-------------|------|------------------------|-------------------------|-------------|-----|
| CakTSSR02883 | CakTC33002 | (AGG)6  | 1612 | 1629 | --          | HB   | GCACAGGTGAAGCATAGTAGT  | TTGATTA AAAAGCTCTCTGCTG | 54.65,55.2  | 150 |
| CakTSSR02884 | CakTC33002 | (AAC)7  | 2000 | 2020 | --          | HB   | GAAGCCAATGGTAGAAGAAAT  | ATATTTTGTGTGGTGTCTG     | 55.15,55.2  | 155 |
| CakTSSR02885 | CakTC33007 | (AAC)5  | 353  | 367  | --          | --   | CACTCTGAACCTAGCCCTAAT  | CTTCGAATCTCGATTCATT     | 55.26,54.52 | 148 |
| CakTSSR02886 | CakTC33013 | (AG)13  | 2881 | 2906 | --          | --   |                        |                         |             |     |
| CakTSSR02887 | CakTC33018 | (CAA)6  | 2711 | 2728 | --          | --   | CAATCCTGTCCAACCTTCATTA | CTCAAAAACCATCAAAACTTG   | 55.24,55.05 | 145 |
| CakTSSR02888 | CakTC33027 | (TC)7   | 1    | 14   | --          | --   |                        |                         |             |     |
| CakTSSR02889 | CakTC33027 | (GGT)5  | 623  | 637  | --          | --   | TAGAGGAAGCTAAAGCAAAGG  | GCACTTTGAAGAAAGGGTTAT   | 55.85,55.23 | 160 |
| CakTSSR02890 | CakTC33039 | (ATG)6  | 107  | 124  | --          | --   | AAGCTTATGTTCTGCTTCTG   | GAGTGAAAGGGTCGTTGTAGT   | 54.24,55.9  | 131 |
| CakTSSR02891 | CakTC33039 | (TCT)11 | 266  | 298  | --          | --   | TGCTTCAATTCATCACTACAA  | GTTTCAAATCTGATGAAGGAA   | 54.42,54.42 | 147 |
| CakTSSR02892 | CakTC33048 | (GA)6   | 10   | 21   | --          | --   |                        |                         |             |     |
| CakTSSR02893 | CakTC33050 | (AGA)5  | 2778 | 2792 | --          | --   | TGAGAACCATTGAGAGTACAGA | GTCTTACCAGAAAAGTAGAGG   | 55.02,54.85 | 144 |
| CakTSSR02894 | CakTC33055 | (AT)10  | 601  | 620  | --          | --   |                        |                         |             |     |
| CakTSSR02895 | CakTC33060 | (TCA)5  | 219  | 233  | --          | --   | CTAATTCCTACCCAAACCAAT  | GAGTGATCCAAACGATGATAG   | 54.91,54.72 | 172 |
| CakTSSR02896 | CakTC33083 | (TTC)5  | 262  | 276  | --          | --   | AGAAAGAACAGTTTGGAGCTT  | GATAAATCGGAAATTGAAAGG   | 55.02,55.48 | 157 |
| CakTSSR02897 | CakTC33100 | (TAA)5  | 357  | 371  | Shoot       | --   | TGGAAAAGGAAGTTATTAAGGA | TGAATACCATCATCCACACTT   | 54.95,55.35 | 178 |
| CakTSSR02898 | CakTC33105 | (TA)8   | 2388 | 2403 | --          | --   |                        |                         |             |     |
| CakTSSR02899 | CakTC33108 | (AGA)7  | 1773 | 1793 | --          | --   | GCTCCTTTCCTTTGTGTATCT  | TTCAGAGTCAAAGAGGTTCAA   | 55.22,55.14 | 155 |
| CakTSSR02900 | CakTC33120 | (AG)25  | 1    | 50   | --          | --   |                        |                         |             |     |
| CakTSSR02901 | CakTC33123 | (ATG)5  | 401  | 415  | --          | --   | TAATATTGGCTGGGTCAACTA  | GGCCTAATTTTAAGCATGAAT   | 54.98,55.28 | 159 |
| CakTSSR02902 | CakTC33129 | (GT)7   | 2330 | 2343 | Mature Leaf | --   |                        |                         |             |     |
| CakTSSR02903 | CakTC33135 | (TTCT)5 | 904  | 923  | --          | --   | TCACCTATAATCAATGCAACC  | ATTAATGGGTTTGCATATTCC   | 55.19,55.62 | 147 |
| CakTSSR02904 | CakTC33144 | (TCT)5  | 629  | 643  | --          | WRKY | TGTCTTGAACGAAACTCTTGT  | GCGAAGGATAAAGATGAAGAT   | 55.08,55.23 | 147 |
| CakTSSR02905 | CakTC33153 | (TTC)6  | 17   | 34   | --          | --   |                        |                         |             |     |
| CakTSSR02906 | CakTC33153 | (GCA)5  | 1717 | 1731 | --          | --   | AGAGGATACCGTAGAGTCAGC  | TTCTTTGGTTCAATTATCTCG   | 55.24,54.66 | 156 |
| CakTSSR02907 | CakTC33163 | (GAA)5  | 6    | 20   | --          | --   |                        |                         |             |     |
| CakTSSR02908 | CakTC33165 | (ACT)6  | 436  | 453  | --          | --   |                        |                         |             |     |
| CakTSSR02909 | CakTC33175 | (TCC)5  | 1143 | 1157 | --          | --   | ATGGCAGTTCATTAGAGAGTG  | GGAAGTGTTGGATGATGATAA   | 54.54,54.98 | 139 |
| CakTSSR02910 | CakTC33191 | (TA)6   | 407  | 418  | --          | --   |                        |                         |             |     |
| CakTSSR02911 | CakTC33197 | (ATC)5  | 255  | 269  | --          | --   | CACTGATCCAAGTGTGTTGACT | ATAGTGTAAGTGAGCCTGACG   | 55.2,54.67  | 149 |
| CakTSSR02912 | CakTC33197 | (AGA)5  | 6203 | 6217 | --          | --   |                        |                         |             |     |
| CakTSSR02913 | CakTC33198 | (CT)6   | 719  | 730  | --          | --   | GCTCCCTCTTAAGTTTACGTC  | CCAAACGTAGAAAAGATGATG   | 54.99,55    | 150 |
| CakTSSR02914 | CakTC33205 | (CAT)6  | 336  | 353  | --          | --   | AGTCAGTTGGGAGCAATAGAT  | TATGAAGTACGTCCGAGCTTA   | 55.49,55.35 | 157 |
| CakTSSR02915 | CakTC33207 | (CCA)5  | 157  | 171  | --          | --   | TGATTAATTGATTGGAGCAGT  | GGAGAATTTAGGGATTGGTA    | 54.91,54.95 | 133 |
| CakTSSR02916 | CakTC33213 | (TCA)6  | 1277 | 1294 | --          | --   | CATCATAGCCATCATCTTGTT  | TGATGAGAGTGATGGTGATT    | 55.18,55.48 | 148 |
| CakTSSR02917 | CakTC33214 | (GCT)5  | 31   | 45   | --          | --   |                        |                         |             |     |
| CakTSSR02918 | CakTC33220 | (TCT)5  | 342  | 356  | --          | --   | CCCTTTCTTTGTCTTCTGAT   | GACGAAGTAACAGGGAAAAAT   | 55.2,55.08  | 152 |
| CakTSSR02919 | CakTC33236 | (AG)8   | 656  | 671  | --          | --   |                        |                         |             |     |

|              |            |           |      |      |           |      |                        |                        |             |     |
|--------------|------------|-----------|------|------|-----------|------|------------------------|------------------------|-------------|-----|
| CakTSSR02920 | CakTC33240 | (AG)10    | 1956 | 1975 | --        | --   | GACAAAATCGGAAGAGAAAAA  | AAAGAAAAGAGAATCCGTTTG  | 56.14,55.36 | 156 |
| CakTSSR02921 | CakTC33242 | (TTC)5    | 164  | 178  | --        | --   | TTACGATGATCAAGTGTGTGA  | TATTTTGGGCTTTGACATTAG  | 55.04,54.72 | 144 |
| CakTSSR02922 | CakTC33246 | (AGA)5    | 1530 | 1544 | --        | --   | TGTAAAGTTGTTTGAGTTGAGC | GACTTAATAGGAGGCAAAAGG  | 54.88,54.94 | 153 |
| CakTSSR02923 | CakTC33251 | (TCAAT)7  | 69   | 103  | --        | --   |                        |                        |             |     |
| CakTSSR02924 | CakTC33253 | (ACC)5    | 114  | 128  | --        | --   | GGCTTCCAACAAATTCTCTAT  | GAGTAGGACAAGGCTTAGGTG  | 55.15,55.74 | 140 |
| CakTSSR02925 | CakTC33256 | (GCA)5    | 220  | 234  | --        | --   | TCITTAGCGAGTTTAAGCAAGA | CATACTTCACTATCACCGCTTA | 54.97,54.82 | 143 |
| CakTSSR02926 | CakTC33266 | (GTG)6    | 2186 | 2203 | --        | --   |                        |                        |             |     |
| CakTSSR02927 | CakTC33267 | (AAG)5    | 804  | 818  | --        | --   | GATGAGGACAAGGAGAAAGAT  | TTCTCCCAGTCATTACTCAA   | 54.92,54.95 | 168 |
| CakTSSR02928 | CakTC33270 | (TTA)8    | 65   | 88   | --        | --   |                        |                        |             |     |
| CakTSSR02929 | CakTC33289 | (CTT)6    | 98   | 115  | --        | --   |                        |                        |             |     |
| CakTSSR02930 | CakTC33291 | (AG)13    | 4884 | 4909 | --        | --   |                        |                        |             |     |
| CakTSSR02931 | CakTC33294 | (GTGACT)5 | 879  | 908  | --        | --   | AAGGACGTGACTGTAAATGTG  | TACACAACCAATTAAGCGTTC  | 55.25,55.51 | 176 |
| CakTSSR02932 | CakTC33298 | (TC)7     | 4    | 17   | --        | --   |                        |                        |             |     |
| CakTSSR02933 | CakTC33303 | (TCT)5    | 63   | 77   | --        | --   |                        |                        |             |     |
| CakTSSR02934 | CakTC33310 | (AT)7     | 2236 | 2249 | --        | --   | AGTGTTCCTCAGTCCATTGTTG | CGAAAGACCTCTGTAATCTCA  | 55.2,54.69  | 148 |
| CakTSSR02935 | CakTC33331 | (TC)6     | 37   | 48   | --        | --   |                        |                        |             |     |
| CakTSSR02936 | CakTC33339 | (CTT)5    | 1933 | 1947 | --        | --   | GCCAACTCTTATTTTCTCTCC  | GTGACGTAACCTCCTTGAGC   | 54.88,55.01 | 166 |
| CakTSSR02937 | CakTC33342 | (TGA)5    | 313  | 327  | --        | --   | GGAGAGTCAACTGAAGACTTT  | CAATGGATATCAAAGAAGTCG  | 55.01,54.92 | 163 |
| CakTSSR02938 | CakTC33348 | (CAA)5    | 1005 | 1019 | --        | --   |                        |                        |             |     |
| CakTSSR02939 | CakTC33354 | (AAT)5    | 656  | 670  | --        | --   | TGATGGATCTGAAGGTAAGAA  | TCAAGTTAGAACCATTACACG  | 54.86,54.71 | 146 |
| CakTSSR02940 | CakTC33357 | (TCA)5    | 322  | 336  | --        | --   | CCTTGATGGGTTAAAGAAGTT  | GCTCTGCAGCTATGTAAAGTG  | 55.09,55.57 | 149 |
| CakTSSR02941 | CakTC33359 | (AC)6     | 226  | 237  | --        | --   | TAGGATACACCAATCCACAC   | GTTATTGTGGTGAAATTGAA   | 54.93,55.08 | 153 |
| CakTSSR02942 | CakTC33364 | (TTC)7    | 2209 | 2229 | --        | --   |                        |                        |             |     |
| CakTSSR02943 | CakTC33382 | (ATG)5    | 269  | 283  | --        | --   | AATTGTAAAAGGGACGAAGTT  | AGCAATATTAGTGCATTGTCC  | 54.71,54.55 | 140 |
| CakTSSR02944 | CakTC33393 | (AT)6     | 57   | 68   | --        | --   |                        |                        |             |     |
| CakTSSR02945 | CakTC33404 | (AAC)6    | 1154 | 1171 | --        | --   | AACCTCTTCAACATTCTTTC   | CTACTTGTTCTGATCCACTG   | 55.03,54.88 | 149 |
| CakTSSR02946 | CakTC33404 | (TGG)5    | 1564 | 1578 | --        | --   | GTAATTTGCAGGATTTGATGA  | TCTCACTATCTGACCACCAAC  | 55.32,55.11 | 149 |
| CakTSSR02947 | CakTC33408 | (AAC)5    | 891  | 905  | --        | --   | AAATGATGTTCTGCTTCTCT   | ATCTTCATTCAACTCCGTTT   | 55.62,55.46 | 151 |
| CakTSSR02948 | CakTC33419 | (TCA)5    | 90   | 104  | --        | bZIP |                        |                        |             |     |
| CakTSSR02949 | CakTC33419 | (TGG)6    | 480  | 497  | --        | bZIP | AAGGGTATCATCAACCACACT  | GAACATTGTCAGAAAACATGG  | 55.95,55.56 | 150 |
| CakTSSR02950 | CakTC33420 | (AG)7     | 154  | 167  | --        | --   | AACAAAATCACCCTTTTCTTC  | ACGTCGAATTAGCCTTAAAC   | 55.04,55.42 | 141 |
| CakTSSR02951 | CakTC33422 | (TTC)7    | 526  | 546  | --        | --   | ATCCATTCTTAAGTCTCTTGC  | TGATGATGAACAAGAACAACA  | 55.14,55    | 151 |
| CakTSSR02952 | CakTC33440 | (AG)7     | 1890 | 1903 | --        | --   |                        |                        |             |     |
| CakTSSR02953 | CakTC33459 | (AC)6     | 295  | 306  | --        | --   | AGTTCAAATTCTAGCCGAAAT  | ACTGCTAAGCTTGTTTCATTG  | 54.93,54.98 | 144 |
| CakTSSR02954 | CakTC33477 | (CT)11    | 97   | 118  | --        | --   |                        |                        |             |     |
| CakTSSR02955 | CakTC33501 | (TA)9     | 585  | 602  | Root      | --   | CAAGGCATAGCTCCATAATAA  | AAGGATCCCATAAAGCAAATA  | 54.83,55.52 | 159 |
| CakTSSR02956 | CakTC33503 | (AGA)6    | 1880 | 1897 | Young_pod | --   |                        |                        |             |     |

|              |            |        |      |      |            |               |                        |                       |             |     |
|--------------|------------|--------|------|------|------------|---------------|------------------------|-----------------------|-------------|-----|
| CakTSSR02957 | CakTC33510 | (GGC)6 | 639  | 656  | --         | --            | GTCAACAAAAGGTGAAAAATTG | TGACACAATATCCATCATCAA | 54.88,54.7  | 161 |
| CakTSSR02958 | CakTC33515 | (ATA)7 | 157  | 177  | --         | --            | CTAACAGATTCCCTTTCTGCT  | GTTGATGGAAGAAAACACAGA | 55.38,55.26 | 128 |
| CakTSSR02959 | CakTC33538 | (AG)7  | 778  | 791  | --         | --            |                        |                       |             |     |
| CakTSSR02960 | CakTC33544 | (CAA)6 | 7554 | 7571 | --         | --            | GGCTTTTCTCTAGCACTCAAT  | AAAATGGTGTAAATCCGTACA | 55.53,54.73 | 148 |
| CakTSSR02961 | CakTC33550 | (CAT)7 | 471  | 491  | Shoot      | --            | TTTCACATCATGGAACAAGA   | CCTCTCTATTTCCTTCGATT  | 54.89,54.44 | 151 |
| CakTSSR02962 | CakTC33559 | (GAT)5 | 328  | 342  | --         | --            | GTGTTGAAAAACCAGATCAAG  | CCCGAACTGTTATAGTGTG   | 54.85,54.96 | 157 |
| CakTSSR02963 | CakTC33570 | (CT)25 | 1    | 50   | --         | --            |                        |                       |             |     |
| CakTSSR02964 | CakTC33572 | (AG)6  | 666  | 677  | --         | --            |                        |                       |             |     |
| CakTSSR02965 | CakTC33602 | (GGT)5 | 96   | 110  | Flower bud | --            |                        |                       |             |     |
| CakTSSR02966 | CakTC33609 | (AT)8  | 290  | 305  | --         | --            | CTCCTAAAAGAAGCACCAAGT  | CATATGTTTCCATCACACACA | 55.46,55.18 | 139 |
| CakTSSR02967 | CakTC33616 | (ATC)6 | 761  | 778  | --         | C2C2-Dof      | CCAGTTCAAGATTTTAAGCAA  | ATCCTCAAAAGGAAACAAAAC | 54.9,55.04  | 144 |
| CakTSSR02968 | CakTC33624 | (AG)7  | 32   | 45   | Flower bud | --            |                        |                       |             |     |
| CakTSSR02969 | CakTC33631 | (CTC)5 | 156  | 170  | --         | --            | GGTCTTCCGTTCCTAAAATAC  | GGAGTTTTGAAGGATTGTTT  | 54.63,55.04 | 166 |
| CakTSSR02970 | CakTC33640 | (TA)10 | 2154 | 2173 | --         | TPR           | CAATTCCTGGTTTGACTGAA   | CTTCTTTCTCACTCCCTCTC  | 55.45,54.89 | 150 |
| CakTSSR02971 | CakTC33643 | (CAA)5 | 394  | 408  | --         | SET           | GGAGGTGAATATTCTTCCAAT  | TTAAACCATTCTCAGTCTCG  | 54.76,54.72 | 149 |
| CakTSSR02972 | CakTC33645 | (TC)6  | 97   | 108  | --         | --            |                        |                       |             |     |
| CakTSSR02973 | CakTC33648 | (GGA)5 | 1109 | 1123 | --         | --            | GGCTGTTCTCCTAGTTTAGGT  | CCACCCTTAGATATGAAACC  | 54.44,55.28 | 171 |
| CakTSSR02974 | CakTC33656 | (CT)7  | 108  | 121  | --         | --            | GTCTGTGAGATCATCCCAAT   | CGAGCGTGGTTAGTGTATTA  | 54.73,55.7  | 149 |
| CakTSSR02975 | CakTC33680 | (CA)8  | 70   | 85   | --         | --            |                        |                       |             |     |
| CakTSSR02976 | CakTC33687 | (ACA)6 | 330  | 347  | --         | --            | TCCACTTCTCTCCTCTTCT    | TGCATAGTTGTTGAAATTGTG | 54.89,54.81 | 153 |
| CakTSSR02977 | CakTC33688 | (CT)10 | 2744 | 2763 | Flower bud | ARF           |                        |                       |             |     |
| CakTSSR02978 | CakTC33692 | (AT)8  | 244  | 259  | --         | --            | CATGATCTTCTTGCTATCTG   | CATACATGGATGGTTGAGATT | 55.06,54.85 | 157 |
| CakTSSR02979 | CakTC33703 | (TCT)5 | 541  | 555  | --         | SBP           | CAACATGGTAACACTGATCCT  | GGGTGAGGAAAAGAAATCTA  | 55,55.13    | 165 |
| CakTSSR02980 | CakTC33708 | (TA)6  | 232  | 243  | Shoot      | --            | GCGGTGCAATATATGAAAT    | ATCATCAAGCCAAGTATGTGT | 55.3,54.66  | 167 |
| CakTSSR02981 | CakTC33715 | (TGT)7 | 258  | 278  | --         | --            | GAATCGGGGTATTGAATAAGT  | CTTAACCTAACCGTTCCTTTC | 54.82,55.17 | 171 |
| CakTSSR02982 | CakTC33720 | (GA)10 | 6926 | 6945 | --         | --            |                        |                       |             |     |
| CakTSSR02983 | CakTC33727 | (CT)8  | 2185 | 2200 | --         | C3H           | AACGTGTGAATGAAGGAACTA  | GAAGGGAGAGAAGAGAAGAGA | 54.89,54.51 | 151 |
| CakTSSR02984 | CakTC33731 | (TC)9  | 61   | 78   | --         | --            |                        |                       |             |     |
| CakTSSR02985 | CakTC33733 | (GGT)5 | 583  | 597  | --         | --            | CGGGTAGAAATCTTTTGTTT   | TCTCTGCACATACTGTTGTG  | 55.25,54.85 | 151 |
| CakTSSR02986 | CakTC33740 | (CT)7  | 31   | 44   | Flower bud | --            |                        |                       |             |     |
| CakTSSR02987 | CakTC33747 | (CT)8  | 652  | 667  | --         | --            |                        |                       |             |     |
| CakTSSR02988 | CakTC33757 | (AG)6  | 713  | 724  | --         | WI/SNF-BAF60b |                        |                       |             |     |
| CakTSSR02989 | CakTC33773 | (GAA)5 | 863  | 877  | --         | --            | CTTGACGATTAGTGAATTGG   | TGGACTGTCTTTCTTCTTCA  | 55,55.14    | 145 |
| CakTSSR02990 | CakTC33777 | (CAC)5 | 301  | 315  | --         | --            | TATCGTCGAAGAATCGAATA   | GAGTCGATTGGAGAAGCTCTT | 55.17,55.17 | 156 |
| CakTSSR02991 | CakTC33792 | (GAA)6 | 364  | 381  | --         | --            | AACCTGGAGTCTTGTGAAGT   | TGAAATGTTGTTAGCTCCAT  | 55.45,54.99 | 157 |
| CakTSSR02992 | CakTC33793 | (AG)25 | 2395 | 2444 | --         | --            |                        |                       |             |     |
| CakTSSR02993 | CakTC33799 | (TTC)6 | 190  | 207  | --         | --            | TCACCCCTACCAACAATTACAC | CTACTCAGCGAACGAATTAC  | 55.02,54.52 | 150 |

|              |            |          |      |      |            |              |                       |                         |             |     |
|--------------|------------|----------|------|------|------------|--------------|-----------------------|-------------------------|-------------|-----|
| CakTSSR02994 | CakTC33803 | (AGA)6   | 348  | 365  | --         | --           | CCTCCTATTCTCCACCTCTAC | TCTTTGTTACATCAGTGTCA    | 54.58,55.07 | 159 |
| CakTSSR02995 | CakTC33806 | (TCA)5   | 443  | 457  | --         | --           | ATCTTTTCTTGCACTTTTCC  | CCTCCTTCTTTCAATCTTGTT   | 55.35,55.2  | 158 |
| CakTSSR02996 | CakTC33810 | (AATTT)7 | 356  | 390  | --         | --           | GAATGGATTGGTGATTCATTA | CCCTGATCAGAAGAGCTAAAT   | 54.92,55.31 | 152 |
| CakTSSR02997 | CakTC33820 | (AT)25   | 2    | 51   | --         | --           |                       |                         |             |     |
| CakTSSR02998 | CakTC33840 | (ATT)7   | 68   | 88   | --         | Pseudo_ARR-B |                       |                         |             |     |
| CakTSSR02999 | CakTC33845 | (TC)7    | 1    | 14   | --         | --           |                       |                         |             |     |
| CakTSSR03000 | CakTC33850 | (TCA)6   | 395  | 412  | --         | --           | ACTTCATCAATTCACAAAAGC | AATCACCACCTTACCTCTGTT   | 54.53,55.25 | 148 |
| CakTSSR03001 | CakTC33858 | (CT)10   | 2318 | 2337 | --         | --           |                       |                         |             |     |
| CakTSSR03002 | CakTC33861 | (GA)6    | 2176 | 2187 | --         | --           | CGAGAGACGAAAACTATAGGA | CATCGAATTCATTCTCTTTGA   | 54,55.45    | 148 |
| CakTSSR03003 | CakTC33861 | (TC)6    | 2447 | 2458 | --         | --           |                       |                         |             |     |
| CakTSSR03004 | CakTC33870 | (ATT)6   | 918  | 935  | --         | --           |                       |                         |             |     |
| CakTSSR03005 | CakTC33896 | (TTC)6   | 414  | 431  | --         | --           | GTCACCGTCTTCATTTC AAC | AGTTTTCTGAATCCGAGGTT    | 55.54,55.45 | 154 |
| CakTSSR03006 | CakTC33903 | (AC)7    | 46   | 59   | --         | --           |                       |                         |             |     |
| CakTSSR03007 | CakTC33907 | (TCC)6   | 232  | 249  | --         | --           | GGTTCCATACATGAACAAAGA | CAATGACAAGAGGTGAGAAAT   | 55.06,54.34 | 152 |
| CakTSSR03008 | CakTC33922 | (GA)7    | 126  | 139  | --         | --           | CTTTCATCCATTATCCAATA  | CTCTGGTGTGAGAGAGAACAG   | 55.09,55.06 | 148 |
| CakTSSR03009 | CakTC33930 | (TC)6    | 61   | 72   | --         | --           |                       |                         |             |     |
| CakTSSR03010 | CakTC33947 | (GA)8    | 459  | 474  | --         | --           | GCAATTGTGACAGTGTTTTCT | TGATTTCATAGGAGTGTGGAAG  | 55.37,55.23 | 150 |
| CakTSSR03011 | CakTC33947 | (ATT)8   | 605  | 628  | --         | --           |                       |                         |             |     |
| CakTSSR03012 | CakTC33954 | (CAA)5   | 599  | 613  | --         | --           | CGACGAGTATGATACATTGGT | CAAAGTTCAATGGACAAAGAC   | 55.13,54.85 | 148 |
| CakTSSR03013 | CakTC33964 | (AGT)5   | 812  | 826  | --         | --           |                       |                         |             |     |
| CakTSSR03014 | CakTC33967 | (TTG)6   | 475  | 492  | Flower bud | --           | GCTTCTTTGTATTCCGATCTT | ACATGATGACAAAACAAAACC   | 55.31,54.97 | 157 |
| CakTSSR03015 | CakTC33971 | (CT)6    | 43   | 54   | --         | --           |                       |                         |             |     |
| CakTSSR03016 | CakTC33978 | (GTG)5   | 2001 | 2015 | --         | --           | ATTTTACGGATCGGAAGTTT  | TCCAAC TACAAATCAAACTCTC | 55.41,54.47 | 148 |
| CakTSSR03017 | CakTC33985 | (AT)8    | 99   | 114  | --         | --           |                       |                         |             |     |
| CakTSSR03018 | CakTC34002 | (CTG)6   | 607  | 624  | --         | LOB          | AGTTTCGAACATCAACAACAG | CAAAGTCAAAGAAGGAGACAA   | 55.38,54.74 | 156 |
| CakTSSR03019 | CakTC34004 | (ATC)8   | 480  | 503  | --         | --           | ATTGCTTTTCCCTTTTCAATC | GATGCTGATGATTTTGTGAGT   | 54.97,55.2  | 149 |
| CakTSSR03020 | CakTC34005 | (AG)9    | 6    | 23   | --         | --           |                       |                         |             |     |
| CakTSSR03021 | CakTC34010 | (GA)7    | 2045 | 2058 | --         | --           |                       |                         |             |     |
| CakTSSR03022 | CakTC34012 | (TA)9    | 165  | 182  | --         | --           | TAAGGGAATAACATCCATTG  | GCAGTTCATGTAATGCTTTATT  | 54.33,53.96 | 152 |
| CakTSSR03023 | CakTC34031 | (CT)7    | 37   | 50   | --         | --           |                       |                         |             |     |
| CakTSSR03024 | CakTC34032 | (TGA)6   | 460  | 477  | --         | --           | GATCTTAACCCTCATATTGGA | TTGAACAATCATTAGCTTCAGT  | 54.96,54.34 | 154 |
| CakTSSR03025 | CakTC34041 | (AGA)5   | 1965 | 1979 | --         | GNAT         | AGATAAGGGTTTTGAGGAATG | GTAAATCCCTAATGGCTCACT   | 55.01,55.03 | 149 |
| CakTSSR03026 | CakTC34044 | (TA)8    | 531  | 546  | --         | --           |                       |                         |             |     |
| CakTSSR03027 | CakTC34061 | (TC)8    | 37   | 52   | --         | --           |                       |                         |             |     |
| CakTSSR03028 | CakTC34086 | (CAA)6   | 295  | 312  | --         | --           | AAGAGAAAGAGATGAAGCACA | TCAATTCCTCTCTTTGTGTA    | 54.37,55.08 | 150 |
| CakTSSR03029 | CakTC34086 | (CTA)6   | 743  | 760  | --         | --           | CCACCTGTTACTATTCTTCA  | AAGGAGAATCAGAACCTTCAC   | 54.43,55.01 | 151 |
| CakTSSR03030 | CakTC34086 | (GAA)6   | 1060 | 1077 | --         | --           | AGGGTAGCATTACAAGTTGGT | TAGAGGAAAATGCCAATGATA   | 55.45,55.02 | 141 |

|              |            |           |      |      |            |          |                        |                        |             |     |
|--------------|------------|-----------|------|------|------------|----------|------------------------|------------------------|-------------|-----|
| CakTSSR03031 | CakTC34086 | (AGA)8    | 1435 | 1458 | --         | --       | CGTTTTTGAAATTGCTAGG    | GTCAGTGAGTTTATCGAATGC  | 55.32,54.96 | 147 |
| CakTSSR03032 | CakTC34099 | (TG)8     | 135  | 150  | --         | --       |                        |                        |             |     |
| CakTSSR03033 | CakTC34103 | (ACC)6    | 33   | 50   | --         | --       |                        |                        |             |     |
| CakTSSR03034 | CakTC34105 | (GA)12    | 2138 | 2161 | --         | --       |                        |                        |             |     |
| CakTSSR03035 | CakTC34113 | (TAAA)5   | 2139 | 2158 | --         | bZIP     | AAAGCATGCACTAATCACAGT  | CAAGTCTTTGTCATCTTTGCT  | 55.08,54.76 | 139 |
| CakTSSR03036 | CakTC34118 | (CAA)5    | 448  | 462  | --         | --       | GTTGATGGAGATCACGAGTAG  | TTCTCATGTGACCACCTAAAG  | 54.78,55.31 | 146 |
| CakTSSR03037 | CakTC34134 | (AAG)6    | 77   | 94   | --         | --       |                        |                        |             |     |
| CakTSSR03038 | CakTC34145 | (AGG)5    | 569  | 583  | Young_pod  | --       | CCATCTACACAACCAACAAT   | TTTTGCTATAGTGTGGAGAG   | 55.02,55.07 | 145 |
| CakTSSR03039 | CakTC34158 | (ATG)6    | 230  | 247  | --         | --       | ATGATATTGAAGTGGTGATG   | ATTAGGACACCTTGAAATCC   | 54.85,54.84 | 146 |
| CakTSSR03040 | CakTC34190 | (TGG)6    | 2320 | 2337 | Root       | --       | GAGTGCTACTTTGGATTCTGTA | TATCACACGTCTGAACCCTAC  | 54.74,55.17 | 146 |
| CakTSSR03041 | CakTC34192 | (TGT)6    | 7403 | 7420 | --         | --       |                        |                        |             |     |
| CakTSSR03042 | CakTC34217 | (AT)9     | 307  | 324  | Root       | --       |                        |                        |             |     |
| CakTSSR03043 | CakTC34221 | (CTT)6    | 1688 | 1705 | --         | --       | TGCTTACCAAGTCTCTTTG    | AAAAAGAACAGAAGTCGGAGT  | 54.96,54.86 | 171 |
| CakTSSR03044 | CakTC34231 | (CAA)5    | 230  | 244  | Root       | --       | TAGGGTTAACTACGCCTTTT   | CTGGAACAAATTAGTCTGGTG  | 55.07,54.9  | 139 |
| CakTSSR03045 | CakTC34231 | (CAG)7    | 368  | 388  | Root       | --       | CACCAGACTAATTGTTCCAG   | GCAGGAGTTCTATCGTTAGTG  | 54.9,54.32  | 143 |
| CakTSSR03046 | CakTC34252 | (TCT)5    | 41   | 55   | --         | --       |                        |                        |             |     |
| CakTSSR03047 | CakTC34258 | (ATA)7    | 63   | 83   | --         | TPR      |                        |                        |             |     |
| CakTSSR03048 | CakTC34258 | (GCA)5    | 479  | 493  | --         | TPR      | GACTGACATGTCTCTCAACC   | TTTGTAGTGAAGAAGGTGCTG  | 54.61,54.88 | 145 |
| CakTSSR03049 | CakTC34281 | (TCA)6    | 1384 | 1401 | --         | --       | ATCAACCTCATTAACATGTCG  | GCTACAGAGACTTCCTCCTC   | 55.1,54.92  | 154 |
| CakTSSR03050 | CakTC34281 | (AGA)10   | 1951 | 1980 | --         | --       |                        |                        |             |     |
| CakTSSR03051 | CakTC34287 | (AAC)6    | 446  | 463  | --         | C2C2-Dof | TGGGTTTGAGTTCTAAACAAG  | CATTTCACAGCTTCTGATTGT  | 54.64,55.47 | 151 |
| CakTSSR03052 | CakTC34289 | (GATTC)6  | 942  | 971  | --         | --       | AGTCGTCTCCTCAGTCACTCT  | AGAAATTGGGTTGTGAGAAAC  | 55.61,55.78 | 155 |
| CakTSSR03053 | CakTC34291 | (GAC)5    | 312  | 326  | Flower bud | --       | CCATCCTATAAGGTCTCTTCC  | ACTAGCCTCCATTAAACCCTA  | 54.53,54.83 | 152 |
| CakTSSR03054 | CakTC34304 | (GAT)5    | 833  | 847  | --         | --       | AAGGGAGATTGAGTTATGAT   | TTTCTTCAACTCCAAATTCAG  | 54.36,54.68 | 149 |
| CakTSSR03055 | CakTC34304 | (AGA)5    | 1216 | 1230 | --         | --       | TGAACAACAACAAGAACATGA  | AGCTTGTGTTCTCTTTCACA   | 55.09,55.25 | 148 |
| CakTSSR03056 | CakTC34306 | (AC)6     | 21   | 32   | --         | --       |                        |                        |             |     |
| CakTSSR03057 | CakTC34326 | (CTT)5    | 196  | 210  | --         | --       | TCACCTCCTCCATTATTAT    | TCCATCTAGAACCCTATGAAA  | 55.21,54    | 147 |
| CakTSSR03058 | CakTC34330 | (TAG)5    | 455  | 469  | Flower bud | --       | CTTGCTTGGTTAGAAGACGTA  | GTGATCCATGATGAGACAAAC  | 54.99,55.29 | 149 |
| CakTSSR03059 | CakTC34350 | (CCT)5    | 2682 | 2696 | --         | --       | AATAGCTCAACCAGACACAGA  | CATTACC GTTATCTTCCCTTT | 55.04,55.06 | 164 |
| CakTSSR03060 | CakTC34354 | (TC)9     | 489  | 506  | --         | PHD      | CTTCTTCTCTCCACCACTCT   | TGTTGTTGTTGATGTTTGIGT  | 55.25,54.85 | 155 |
| CakTSSR03061 | CakTC34354 | (TC)7     | 636  | 649  | --         | PHD      | CTTCTTCTTCTCCACCACTCT  | TGTTGTTGTTGATGTTTGIGT  | 55.25,54.85 | 155 |
| CakTSSR03062 | CakTC34358 | (TA)6     | 1823 | 1834 | --         | --       | CATAGTCGGAGGTGATAACTG  | CGATGTAGCCAAATGTAAAAG  | 54.85,55.21 | 143 |
| CakTSSR03063 | CakTC34364 | (CT)11    | 2202 | 2223 | --         | --       |                        |                        |             |     |
| CakTSSR03064 | CakTC34371 | (CAA)5    | 146  | 160  | --         | --       | GAAAAATTCGCAGACTCATAC  | TGTTGAAGTTACGAGTCCAAT  | 54.22,54.89 | 183 |
| CakTSSR03065 | CakTC34377 | (TTCATT)6 | 1713 | 1748 | --         | --       | AGCGATATAATCTCACGTTTG  | AATCAACACTCTCTCTCACC   | 54.72,55.8  | 152 |
| CakTSSR03066 | CakTC34380 | (AG)6     | 308  | 319  | --         | --       | TCGCTGCTTTATAACTTCAAC  | ACCAATTCACCTTCACACACT  | 55.08,54.6  | 160 |
| CakTSSR03067 | CakTC34383 | (AAT)7    | 1862 | 1882 | --         | --       | GTCGCTTAAAAGCATGAGATA  | GAAATAGAAATCACGATCACG  | 55,54.91    | 155 |

|              |            |           |      |      |            |      |                       |                         |             |     |
|--------------|------------|-----------|------|------|------------|------|-----------------------|-------------------------|-------------|-----|
| CakTSSR03068 | CakTC34389 | (GAA)5    | 445  | 459  | --         | --   | TTAAATTGAAGGAGGAAGAGG | CTTCACAACACCAACATTCTC   | 55.3,55.64  | 137 |
| CakTSSR03069 | CakTC34394 | (CTT)7    | 618  | 638  | Flower bud | --   |                       |                         |             |     |
| CakTSSR03070 | CakTC34407 | (GAT)6    | 1930 | 1947 | --         | --   | GGAATTGAGGTCAAAGAAGAT | TCCTTTTCTCTCTTCTCACA    | 54.95,54.35 | 177 |
| CakTSSR03071 | CakTC34412 | (ATG)6    | 2187 | 2204 | --         | --   |                       |                         |             |     |
| CakTSSR03072 | CakTC34427 | (AAC)7    | 448  | 468  | --         | GRAS | CCCCAAACATCAACAATCTTA | CCTGTTGGAAATTCTAGGTT    | 55.25,55.09 | 132 |
| CakTSSR03073 | CakTC34433 | (CTT)5    | 268  | 282  | --         | --   | CTTAAGTGCTTTCAGCTTTTG | TGAGCACAAACACAAAACATA   | 54.89,55.31 | 152 |
| CakTSSR03074 | CakTC34449 | (AAC)5    | 344  | 358  | --         | --   | TCATCATCATCACAACAACAC | CGAAGCTCTGTTCTCTTCTT    | 55.11,55.74 | 147 |
| CakTSSR03075 | CakTC34462 | (TTTA)5   | 4    | 23   | --         | --   |                       |                         |             |     |
| CakTSSR03076 | CakTC34470 | (GA)16    | 2088 | 2119 | --         | --   |                       |                         |             |     |
| CakTSSR03077 | CakTC34473 | (AAT)9    | 113  | 139  | --         | --   | TGAGAATATGTACGTCTGCAA | TGAGTGTGACTCTCAGGTCT    | 54.46,54.87 | 146 |
| CakTSSR03078 | CakTC34490 | (TA)6     | 58   | 69   | --         | --   |                       |                         |             |     |
| CakTSSR03079 | CakTC34498 | (CTG)5    | 609  | 623  | --         | --   | GGAATGATGTTTCGTCTACTG | CTCTTCTCTCTCAAGGCTAT    | 54.8,54.65  | 138 |
| CakTSSR03080 | CakTC34507 | (AC)8     | 119  | 134  | --         | --   | CAGGGTCACAGGTTACATT   | TGCGTATGCAACTTACTACAA   | 54.99,54.78 | 165 |
| CakTSSR03081 | CakTC34513 | (GAA)8    | 45   | 68   | --         | --   |                       |                         |             |     |
| CakTSSR03082 | CakTC34516 | (TGG)7    | 1024 | 1044 | --         | --   | TGTCACGTGAGAAAATGAGTA | CTCCACTTTCCTCAATAAAAAAT | 54.3,55.03  | 161 |
| CakTSSR03083 | CakTC34522 | (GGT)6    | 135  | 152  | --         | --   | AATAAAGGGAGGATTGATGAG | ATCCATTTTAGATCCACCACT   | 54.93,55.11 | 146 |
| CakTSSR03084 | CakTC34530 | (ATT)5    | 115  | 129  | --         | --   | TGATCTTCAAGACAAAACCAT | CATCGGTTTATTTCAATTGTC   | 54.77,54.77 | 153 |
| CakTSSR03085 | CakTC34533 | (TCT)5    | 187  | 201  | --         | SET  | TACGCTTTTATCTCCGATCTA | TCGAGATTAGAAAACCCTAGC   | 54.56,55.47 | 149 |
| CakTSSR03086 | CakTC34542 | (TC)6     | 11   | 22   | --         | --   |                       |                         |             |     |
| CakTSSR03087 | CakTC34546 | (CTT)5    | 161  | 175  | --         | --   | TTTCATCTAATGGCTTCTTCA | TGAAACGAAGAAGATCTCTG    | 55.21,54.82 | 148 |
| CakTSSR03088 | CakTC34548 | (CTT)5    | 23   | 37   | --         | --   |                       |                         |             |     |
| CakTSSR03089 | CakTC34556 | (CT)10    | 5    | 24   | --         | bHLH |                       |                         |             |     |
| CakTSSR03090 | CakTC34556 | (ATTCAT)7 | 200  | 241  | --         | bHLH | AACTCACCCCTTTTCTTCAAA | AGGATAAAGGTGAAGCAAATC   | 55.67,55.15 | 148 |
| CakTSSR03091 | CakTC34562 | (ACA)5    | 351  | 365  | --         | --   | AAAAACAGAATCTCATGCTCA | GTTGTGTGTTGGGTTTGT      | 55.1,55.04  | 160 |
| CakTSSR03092 | CakTC34568 | (CAC)5    | 2255 | 2269 | --         | --   |                       |                         |             |     |
| CakTSSR03093 | CakTC34569 | (ATG)6    | 1904 | 1921 | --         | --   | CTGAAGATGACAATTCAAAGG | CAGTATTGCCTTCACTTGTTT   | 54.95,54.66 | 150 |
| CakTSSR03094 | CakTC34582 | (GA)10    | 48   | 67   | --         | --   |                       |                         |             |     |
| CakTSSR03095 | CakTC34586 | (CT)9     | 143  | 160  | --         | --   | AAGTTCACCTCTTCTCTCC   | GTTAAGCTAAAGCAACCAACA   | 55,55       | 151 |
| CakTSSR03096 | CakTC34589 | (AG)6     | 2060 | 2071 | --         | --   |                       |                         |             |     |
| CakTSSR03097 | CakTC34590 | (ATA)8    | 15   | 38   | --         | --   |                       |                         |             |     |
| CakTSSR03098 | CakTC34601 | (TGTT)6   | 399  | 422  | --         | --   | ACTACACCCCTTTGTGATAC  | ACACAACCAAGATACACACC    | 55.54,54.9  | 149 |
| CakTSSR03099 | CakTC34624 | (AG)10    | 579  | 598  | --         | --   |                       |                         |             |     |
| CakTSSR03100 | CakTC34630 | (GAA)5    | 366  | 380  | --         | --   | GATGAACACGGTTTTGTATGT | CCTCTCTTCTAATTGGGACTC   | 55.01,54.71 | 154 |
| CakTSSR03101 | CakTC34637 | (TA)8     | 141  | 156  | --         | WRKY | GACGAGTGAGAAATGCATAAG | TTCAAGACATTGTCCCTTCTA   | 55.13,54.95 | 157 |
| CakTSSR03102 | CakTC34640 | (AT)6     | 227  | 238  | --         | --   |                       |                         |             |     |
| CakTSSR03103 | CakTC34645 | (AAC)5    | 90   | 104  | --         | --   |                       |                         |             |     |
| CakTSSR03104 | CakTC34649 | (GAC)6    | 329  | 346  | --         | --   | TATTTCCGACATCATTCTCTC | GAAGGGCTAAGTAGCAAAGAC   | 54.36,55.14 | 155 |

|              |            |            |      |      |            |             |                        |                        |             |     |
|--------------|------------|------------|------|------|------------|-------------|------------------------|------------------------|-------------|-----|
| CakTSSR03105 | CakTC34659 | (AAT)8     | 6657 | 6680 | --         | --          | GGATCTTGACAAACATAATCG  | CGGATAGCATTATAGAGAGTTG | 54.74,53.66 | 150 |
| CakTSSR03106 | CakTC34684 | (GT)6      | 3703 | 3714 | --         | --          |                        |                        |             |     |
| CakTSSR03107 | CakTC34693 | (TTC)7     | 15   | 35   | --         | --          |                        |                        |             |     |
| CakTSSR03108 | CakTC34696 | (TCT)6     | 173  | 190  | --         | --          | CTTCAACTCAACTTCACCAC   | TTTCTTGAAATGAACTCACCT  | 54.92,54.08 | 149 |
| CakTSSR03109 | CakTC34702 | (TC)6      | 573  | 584  | --         | --          | TGAGTCTACCATTTTCGTCTTG | TTTCAGCTCAGGATAACAAAG  | 55.48,54.88 | 131 |
| CakTSSR03110 | CakTC34702 | (AG)8      | 3833 | 3848 | --         | --          | ATGGAGGAAGAGTAAACCTTA  | AATAGTCCAAATCCAAACCAC  | 54.61,55.59 | 142 |
| CakTSSR03111 | CakTC34704 | (ATG)10    | 404  | 433  | Flower bud | --          | TGGTTGAGGACAAAGAATATG  | CTTCCACTTCAACTCTTCCT   | 55.24,55.26 | 153 |
| CakTSSR03112 | CakTC34705 | (TC)7      | 46   | 59   | --         | --          |                        |                        |             |     |
| CakTSSR03113 | CakTC34717 | (TGC)5     | 2749 | 2763 | Flower bud | --          | AGATGATAGAGTTGCCATCAA  | ATATGAATCGAAGCGAAGAA   | 54.88,55.14 | 150 |
| CakTSSR03114 | CakTC34718 | (AAC)5     | 793  | 807  | --         | --          | GAGCTTTGGAATTATGTTTCA  | TTGTTCCAATTCAACTTTCAC  | 54.65,55.28 | 194 |
| CakTSSR03115 | CakTC34727 | (GTG)9     | 1    | 27   | --         | --          |                        |                        |             |     |
| CakTSSR03116 | CakTC34729 | (CTT)10    | 127  | 156  | --         | --          | TGTGTGTCTTTCTTTCCATCT  | AGTAAGAAAAATTGGCAGAGG  | 54.83,55.39 | 148 |
| CakTSSR03117 | CakTC34751 | (AT)10     | 192  | 211  | --         | --          | TCACTTTCTCTATACCAATCC  | ACCAATGAAAGCTAGGCTAAT  | 55.02,54.97 | 136 |
| CakTSSR03118 | CakTC34754 | (AG)12     | 3280 | 3303 | --         | --          |                        |                        |             |     |
| CakTSSR03119 | CakTC34758 | (GGT)5     | 318  | 332  | --         | --          |                        |                        |             |     |
| CakTSSR03120 | CakTC34765 | (TTC)20    | 182  | 241  | --         | Bromodomain | GGTGAAATTGTAAGAGTCCAA  | GCGAGTGGATAAACAAATAAG  | 54.38,54.31 | 160 |
| CakTSSR03121 | CakTC34799 | (TC)13     | 97   | 122  | --         | --          |                        |                        |             |     |
| CakTSSR03122 | CakTC34811 | (AC)6      | 133  | 144  | --         | --          | AGAAACTTGGAATTCTCCAC   | TTACCATGTACACGAGGTTTT  | 55.09,54.79 | 153 |
| CakTSSR03123 | CakTC34816 | (GAT)5     | 406  | 420  | Shoot      | --          | CTCATTTCCACATATTATCA   | GAGTTGTGGCAGAGTAATCAT  | 54.96,54.36 | 135 |
| CakTSSR03124 | CakTC34826 | (GAG)5     | 315  | 329  | --         | --          | TCTTCTTCTTCAGTGGCTATG  | GTTTCTTCAATCTCCGATCAT  | 54.85,55.79 | 157 |
| CakTSSR03125 | CakTC34832 | (ACATGA)5  | 72   | 101  | --         | --          |                        |                        |             |     |
| CakTSSR03126 | CakTC34833 | (AT)6      | 176  | 187  | --         | SBP         | GGCTTACTATCTTGCCAATG   | GGAAGAGTGAAAGTCTTGTT   | 55.09,55.09 | 150 |
| CakTSSR03127 | CakTC34838 | (TC)18     | 301  | 336  | --         | --          |                        |                        |             |     |
| CakTSSR03128 | CakTC34839 | (GT)6      | 3527 | 3538 | --         | --          |                        |                        |             |     |
| CakTSSR03129 | CakTC34844 | (AGTG)5    | 3699 | 3718 | --         | --          | TTGTGGAATCTACGAGTGAGT  | TGGGGTAGAGTAGAATGAGAA  | 54.87,54.04 | 153 |
| CakTSSR03130 | CakTC34847 | (AG)8      | 1436 | 1451 | --         | HB          | AAAAGGAAGCGATAGAGAAAG  | TGAAGAGTTCTCAAACATCGT  | 54.83,55    | 150 |
| CakTSSR03131 | CakTC34847 | (ACC)5     | 1870 | 1884 | --         | HB          | CCACAATTGAAAACCAAAAT   | GGGAAATTGAACATCTCTGAT  | 55.07,55.63 | 163 |
| CakTSSR03132 | CakTC34847 | (TCT)6     | 2615 | 2632 | --         | HB          | GGTGGATTAGGAACGATTAAC  | CCAACACTACAAAACCTTCC   | 55.27,54.04 | 149 |
| CakTSSR03133 | CakTC34847 | (ATA)6     | 3450 | 3467 | --         | HB          | GCAGAAGGATCAGATACAGAA  | TTGGATCTCTTGATGTTGTT   | 54.58,54.77 | 152 |
| CakTSSR03134 | CakTC34847 | (TAT)5     | 3975 | 3989 | --         | HB          | GACTTTGGAGGCATTTAATTT  | CTTCTTCCTTTCCTCCATAA   | 55.17,55.3  | 259 |
| CakTSSR03135 | CakTC34864 | (ATT)6     | 27   | 44   | --         | --          |                        |                        |             |     |
| CakTSSR03136 | CakTC34866 | (TC)10     | 99   | 118  | --         | --          |                        |                        |             |     |
| CakTSSR03137 | CakTC34873 | (AG)6      | 886  | 897  | --         | --          | TGCAAGAGGATTTATTGTGTT  | ACAGGATTGAAACTCAAGGAC  | 54.99,55.79 | 160 |
| CakTSSR03138 | CakTC34874 | (CAAAATG)7 | 34   | 75   | --         | --          |                        |                        |             |     |
| CakTSSR03139 | CakTC34876 | (TGT)5     | 382  | 396  | --         | --          | CTAGTCTCCAACAAAAACCT   | TGCATAAACTAGAAGCAGGAC  | 55.15,54.9  | 138 |
| CakTSSR03140 | CakTC34887 | (AT)6      | 999  | 1010 | --         | --          | CGAATGCTAACCTAGAAAAAT  | TGTTTGTAGTGGAGATCTTGC  | 55.36,55.47 | 134 |
| CakTSSR03141 | CakTC34888 | (CT)7      | 128  | 141  | --         | CAMTA       | GGAAAAAGGAAAAACGAATAC  | AGCTTCAAATGTGAATTGCTG  | 54.77,54.92 | 153 |

|              |            |           |      |      |             |         |                         |                        |             |     |
|--------------|------------|-----------|------|------|-------------|---------|-------------------------|------------------------|-------------|-----|
| CakTSSR03142 | CakTC34891 | (AG)6     | 1874 | 1885 | --          | --      | CTTGGGACATGTCTTTGACT    | ATACCCACTCTCACAAACAC   | 55.1,54.88  | 159 |
| CakTSSR03143 | CakTC34899 | (AG)6     | 432  | 443  | --          | --      |                         |                        |             |     |
| CakTSSR03144 | CakTC34903 | (CAT)5    | 113  | 127  | --          | --      | AAAATCTCCACCTACAAGTCC   | TGGTGAAAATGGTAGAGATTG  | 54.9,55.24  | 152 |
| CakTSSR03145 | CakTC34915 | (GTGATG)5 | 3080 | 3109 | --          | --      | GCAGATAAAATTTGAGAAGCA   | CACAGAGTAAGCGAGAACTCA  | 54.96,55.89 | 166 |
| CakTSSR03146 | CakTC34920 | (TGA)8    | 698  | 721  | --          | --      | CTGAATTCGATTCGTTTTGTA   | TTGCTTGATATGCTTCAAAC   | 55.57,55.31 | 150 |
| CakTSSR03147 | CakTC34941 | (TGT)5    | 182  | 196  | Flower bud  | --      | AGCAAGAGAATGTGATGAAGA   | GGAACCTCACACCAATTATGA  | 55.08,55.06 | 157 |
| CakTSSR03148 | CakTC34971 | (TGC)5    | 2275 | 2289 | --          | --      | AAGCCTCAATACATAGCACAA   | CTTTAATCCTTTTGGCTTTC   | 55.18,55.08 | 157 |
| CakTSSR03149 | CakTC34986 | (TTA)6    | 428  | 445  | Mature Leaf | --      | TTTGAAATGAGTGTCAAATCC   | CCTCTCCCCTTTCTGATAATA  | 55.19,55.1  | 146 |
| CakTSSR03150 | CakTC34987 | (CAT)5    | 362  | 376  | --          | --      | CTATGGGAGCAACCTACATAA   | AAGTGATGATGACGAAGATGA  | 54.57,55.65 | 150 |
| CakTSSR03151 | CakTC35004 | (TTC)6    | 599  | 616  | Root        | --      |                         |                        |             |     |
| CakTSSR03152 | CakTC35005 | (TCT)5    | 68   | 82   | --          | --      |                         |                        |             |     |
| CakTSSR03153 | CakTC35010 | (AG)13    | 2793 | 2818 | --          | --      |                         |                        |             |     |
| CakTSSR03154 | CakTC35024 | (AT)6     | 197  | 208  | --          | --      | ACTAACCCCTCCCTGTATATG   | ATTTCTTTTGTGGAAGATGG   | 54.77,55.87 | 152 |
| CakTSSR03155 | CakTC35041 | (CA)8     | 4    | 19   | --          | --      |                         |                        |             |     |
| CakTSSR03156 | CakTC35052 | (TC)8     | 9    | 24   | --          | --      |                         |                        |             |     |
| CakTSSR03157 | CakTC35057 | (CAC)6    | 79   | 96   | --          | --      |                         |                        |             |     |
| CakTSSR03158 | CakTC35065 | (TTG)6    | 2271 | 2288 | --          | --      | GAATTTGCGATTGGAGTAATA   | CTTCTCCCCTTTTCACTTTC   | 54.63,55.67 | 158 |
| CakTSSR03159 | CakTC35086 | (TA)6     | 7    | 18   | --          | --      |                         |                        |             |     |
| CakTSSR03160 | CakTC35090 | (TC)8     | 104  | 119  | --          | --      | CTTCACCCATTCTCTCTCTT    | ATCCTACTTAGGCTGTGGAAT  | 55.18,54.79 | 157 |
| CakTSSR03161 | CakTC35095 | (GAA)6    | 55   | 72   | --          | --      |                         |                        |             |     |
| CakTSSR03162 | CakTC35097 | (ATG)8    | 1316 | 1339 | --          | --      | AACTTGTTGATCTCAATGGTG   | AGGTATCTCATCTCCCAAAAC  | 55.13,54.82 | 143 |
| CakTSSR03163 | CakTC35111 | (TAA)6    | 3892 | 3909 | --          | --      |                         |                        |             |     |
| CakTSSR03164 | CakTC35113 | (CT)7     | 1    | 14   | --          | --      |                         |                        |             |     |
| CakTSSR03165 | CakTC35119 | (GTG)5    | 968  | 982  | --          | --      | ATGAAGATACAGCATCGTTTC   | TTCTCATTACACTCCCTCTA   | 54.47,54.92 | 149 |
| CakTSSR03166 | CakTC35119 | (ATG)5    | 2715 | 2729 | --          | --      | ATCATGTCACTGTGTTCAAGGT  | AAATAAGTCCGAATTTTCATCC | 55.32,54.94 | 164 |
| CakTSSR03167 | CakTC35124 | (TA)6     | 117  | 128  | --          | G2-like | CCAGAAACATTCTATGATTGC   | CAGCAACAACAGCTAGAAAAG  | 54.91,55.63 | 126 |
| CakTSSR03168 | CakTC35131 | (TCT)5    | 168  | 182  | --          | --      | CTTCTTCACCATTCTCTTCA    | TGTTGTTGTTGTGATGTTGTT  | 54.65,54.85 | 150 |
| CakTSSR03169 | CakTC35131 | (TGT)5    | 723  | 737  | --          | --      | TGCCATCTTTACCTAGCAATA   | TAAATTTGACCTCTGAAGCTG  | 55.28,54.88 | 169 |
| CakTSSR03170 | CakTC35134 | (TA)6     | 3004 | 3015 | --          | --      |                         |                        |             |     |
| CakTSSR03171 | CakTC35154 | (TC)8     | 4019 | 4034 | --          | --      |                         |                        |             |     |
| CakTSSR03172 | CakTC35156 | (AT)8     | 148  | 163  | --          | --      | AATTAACCTTAAGTCCATAAACG | CTGTTTCTGTTACGTCTCTGC  | 54.77,55.29 | 136 |
| CakTSSR03173 | CakTC35156 | (GA)9     | 434  | 451  | --          | --      |                         |                        |             |     |
| CakTSSR03174 | CakTC35159 | (AG)8     | 942  | 957  | --          | WRKY    |                         |                        |             |     |
| CakTSSR03175 | CakTC35160 | (GAGT)5   | 3869 | 3888 | --          | --      |                         |                        |             |     |
| CakTSSR03176 | CakTC35163 | (ATA)7    | 142  | 162  | --          | --      | TTGCTTTTTATTCTCTGCAAC   | GTGAGATCCTTGAGATCTGTG  | 55.04,54.71 | 150 |
| CakTSSR03177 | CakTC35189 | (TC)7     | 82   | 95   | --          | --      |                         |                        |             |     |
| CakTSSR03178 | CakTC35190 | (TTTA)5   | 116  | 135  | --          | --      | AACTATTGCGTAGGGTAATGA   | GAAGAAAGAGTGAGGAAGCAT  | 54.19,55.33 | 180 |

|              |            |         |      |      |       |             |                       |                         |             |     |
|--------------|------------|---------|------|------|-------|-------------|-----------------------|-------------------------|-------------|-----|
| CakTSSR03179 | CakTC35199 | (AG)8   | 2813 | 2828 | --    | --          |                       |                         |             |     |
| CakTSSR03180 | CakTC35202 | (CT)8   | 21   | 36   | --    | --          |                       |                         |             |     |
| CakTSSR03181 | CakTC35202 | (GAA)5  | 1362 | 1376 | --    | --          | GTCCCCCTCTGTACATTCTGA | ATTTTGTGCAGTGTCACTCTCT  | 55.01,54.85 | 153 |
| CakTSSR03182 | CakTC35209 | (TA)8   | 1    | 16   | Shoot | --          |                       |                         |             |     |
| CakTSSR03183 | CakTC35209 | (TTG)5  | 491  | 505  | Shoot | --          | TAGTGGGGAAGAAGGTAATCT | ATTCAGCAATCTCATGTCAAG   | 54.61,55.38 | 138 |
| CakTSSR03184 | CakTC35220 | (TCT)6  | 985  | 1002 | --    | --          | TCACTATCCTCACTCATGCTT | GAATATCTCAAGAAACGCAAG   | 54.95,54.4  | 155 |
| CakTSSR03185 | CakTC35220 | (TCA)5  | 1249 | 1263 | --    | --          | TGTCAAAGTCTGCCTCATAAT | TCATCTCCAGAATCATTTGAC   | 54.97,55.09 | 151 |
| CakTSSR03186 | CakTC35225 | (GA)6   | 96   | 107  | --    | --          |                       |                         |             |     |
| CakTSSR03187 | CakTC35240 | (TAT)6  | 3239 | 3256 | --    | --          | AACACTCAATCAAGTTGGGTA | GCTCTTCAATCTTTTATGTCC   | 54.72,53.32 | 169 |
| CakTSSR03188 | CakTC35249 | (CTT)7  | 49   | 69   | --    | --          |                       |                         |             |     |
| CakTSSR03189 | CakTC35250 | (TAA)6  | 210  | 227  | --    | --          | TGCTTCAATACAAAAATGGTC | CTCACTTCCTCTCAAAACTT    | 55.4,55.26  | 135 |
| CakTSSR03190 | CakTC35289 | (AG)8   | 53   | 68   | --    | --          |                       |                         |             |     |
| CakTSSR03191 | CakTC35302 | (TC)7   | 143  | 156  | --    | --          | TTCGTTCTTCACTACGCTATT | AGAGAAGAGAGCGATGAGAAT   | 54.52,55    | 173 |
| CakTSSR03192 | CakTC35304 | (GA)12  | 3379 | 3402 | --    | --          |                       |                         |             |     |
| CakTSSR03193 | CakTC35309 | (AGA)9  | 658  | 684  | --    | Bromodomain | TGAAGAAGAGGAAGAAGAAGG | GAATCAACTTTTGTGCCATTA   | 55.48,55.4  | 153 |
| CakTSSR03194 | CakTC35319 | (AAT)16 | 690  | 737  | --    | --          |                       |                         |             |     |
| CakTSSR03195 | CakTC35328 | (AC)6   | 368  | 379  | --    | --          | CAGCAAGACAACAGAAAGAAT | TTTTGTGTACTACTGCTGCTG   | 54.76,54.38 | 150 |
| CakTSSR03196 | CakTC35334 | (AG)7   | 47   | 60   | --    | --          |                       |                         |             |     |
| CakTSSR03197 | CakTC35341 | (ATC)6  | 694  | 711  | --    | --          | CCTCTCTTTAAACCTTTTGG  | AGCTTCGGGAGTTTATGTAGT   | 55,54.87    | 159 |
| CakTSSR03198 | CakTC35344 | (TGT)5  | 2630 | 2644 | --    | --          | AATATCGTAGCTTCGAAAACC | CCAGATAGCTTTCATTACTCC   | 55.35,54.95 | 162 |
| CakTSSR03199 | CakTC35344 | (AT)10  | 3048 | 3067 | --    | --          | CTGCTTCGTCTGTTAAACATT | CCACATAACATCAAAAGAAAATC | 54.82,55.5  | 152 |
| CakTSSR03200 | CakTC35344 | (AG)6   | 3306 | 3317 | --    | --          | GTTTTTGCTTTTGGGGTTAG  | AAGCTACAACCTCATCTTTT    | 55.84,54.84 | 141 |
| CakTSSR03201 | CakTC35349 | (CT)8   | 256  | 271  | --    | CAMTA       | CTTTCTCTGATCCTTTTCGAT | GATGCCATGATATTGAATCTG   | 55.27,55.52 | 154 |
| CakTSSR03202 | CakTC35350 | (AC)6   | 658  | 669  | --    | --          | TCCAGAGCAACAAATAAACAT | CGCTCTGATTGTAAGATGAGT   | 54.99,54.71 | 150 |
| CakTSSR03203 | CakTC35400 | (TCT)7  | 139  | 159  | --    | --          | TCTTGCAACATTCTTCAATCT | TTTTTGGTCAAGTATGAGCTG   | 55.1,55.64  | 146 |
| CakTSSR03204 | CakTC35405 | (TC)8   | 92   | 107  | --    | --          |                       |                         |             |     |
| CakTSSR03205 | CakTC35406 | (TC)7   | 108  | 121  | --    | --          | CCTTCAGACTCTCTCACACAC | TTGAAGGTTTCGTGTTTCTA    | 54.87,55.21 | 152 |
| CakTSSR03206 | CakTC35410 | (GTT)6  | 2468 | 2485 | --    | --          | TAGAAGGAAGAAGAAGGAGGA | ATCTTCAATCGTCTACGAACA   | 55,54.97    | 159 |
| CakTSSR03207 | CakTC35410 | (TCG)5  | 2724 | 2738 | --    | --          | GTGGTGAACCGTTGTAGTAAC | AACCAGACCATGAATTAGACC   | 54.67,55.58 | 138 |
| CakTSSR03208 | CakTC35417 | (CAC)6  | 1777 | 1794 | --    | --          | TAITCTATGCCTCTTCCACCT | CATTAGTCACTCTGTGGGAAG   | 55.59,54.88 | 145 |
| CakTSSR03209 | CakTC35426 | (CT)7   | 43   | 56   | --    | --          |                       |                         |             |     |
| CakTSSR03210 | CakTC35426 | (AGC)5  | 2731 | 2745 | --    | --          | ATCAAAATAATGGATCTGCTG | AGTGCTGCTTGTAGTAATGGA   | 54.44,55.25 | 161 |
| CakTSSR03211 | CakTC35431 | (AG)10  | 3588 | 3607 | --    | MYB-related |                       |                         |             |     |
| CakTSSR03212 | CakTC35435 | (ATT)5  | 3364 | 3378 | --    | --          | TGGGCTTCTAAAATACTCACA | ATCCCGCTCAATTTTAAGTGG   | 55.16,55.06 | 150 |
| CakTSSR03213 | CakTC35436 | (TTC)13 | 211  | 249  | --    | --          | TCITTAATCCATTTCCTCT   | ATTTCTTTCTTCGTCTTCGAC   | 54.68,55.34 | 152 |
| CakTSSR03214 | CakTC35451 | (TA)9   | 233  | 250  | --    | --          | CACCTATGAGAAAAACCAATA | GCTTTTAGGAACTTCCAATC    | 54.38,54.9  | 177 |
| CakTSSR03215 | CakTC35452 | (TC)7   | 74   | 87   | --    | --          |                       |                         |             |     |

|              |            |          |      |      |            |             |                        |                        |             |     |
|--------------|------------|----------|------|------|------------|-------------|------------------------|------------------------|-------------|-----|
| CakTSSR03216 | CakTC35454 | (GTT)8   | 273  | 296  | --         | --          | ATATTGGGTCAACGCTATGTA  | CCAGAACATGAAGACAAAAAC  | 54.84,54.85 | 135 |
| CakTSSR03217 | CakTC35460 | (AG)8    | 4080 | 4095 | --         | --          |                        |                        |             |     |
| CakTSSR03218 | CakTC35480 | (TAA)5   | 376  | 390  | --         | --          | CAAAGCTCTCATGTCCACTAC  | GAATCAACCGTAACAAACAAA  | 55.04,55.32 | 139 |
| CakTSSR03219 | CakTC35481 | (GAT)5   | 795  | 809  | --         | --          | CTGAGAGGATGTTGTTGAGTT  | AGACTGCAGCTAAGAGGTTTT  | 54.39,55.21 | 146 |
| CakTSSR03220 | CakTC35487 | (AG)6    | 164  | 175  | --         | ARF         | AACACTGAGAACACAAGCAAC  | TTGTTAGTGAGAGAGCGAAAC  | 55.45,54.93 | 156 |
| CakTSSR03221 | CakTC35489 | (TA)6    | 18   | 29   | Flower bud | --          |                        |                        |             |     |
| CakTSSR03222 | CakTC35493 | (GTT)5   | 1712 | 1726 | --         | --          | ACTTCTTCATCATCGAAACCT  | TACTACTTCGATCTCCGATCA  | 55.46,55.06 | 152 |
| CakTSSR03223 | CakTC35498 | (TAG)6   | 297  | 314  | Young_pod  | --          | TTATGCTCTTCTCCTCTCT    | CAACTATGCCAAAAACAAGAC  | 55.03,55.07 | 119 |
| CakTSSR03224 | CakTC35501 | (AAT)5   | 241  | 255  | --         | --          | ATATAACTTGCAATGCCCTTA  | TTCAGTAGAGAAAGCCAAGAA  | 54.3,54.59  | 146 |
| CakTSSR03225 | CakTC35527 | (TC)6    | 107  | 118  | --         | TPR         | ACAGGAGTGGTTCTTTGAAG   | TGGAATGAAAGATTGGTGTAT  | 56.03,54.58 | 144 |
| CakTSSR03226 | CakTC35537 | (TAT)8   | 157  | 180  | --         | --          | AAACCTTGTGACATGTTTCTC  | TTGTGGTATGGAAGTCAAATC  | 54.24,55.06 | 149 |
| CakTSSR03227 | CakTC35540 | (CCT)5   | 2341 | 2355 | --         | --          | CATCTGCTACATCTGTTCTCTC | GAAGTATCCTTCTTTGCTTCC  | 54.95,54.88 | 184 |
| CakTSSR03228 | CakTC35555 | (AC)7    | 498  | 511  | --         | --          |                        |                        |             |     |
| CakTSSR03229 | CakTC35558 | (CA)6    | 57   | 68   | --         | --          |                        |                        |             |     |
| CakTSSR03230 | CakTC35564 | (TTC)6   | 4076 | 4093 | --         | --          | ACTCTGTTACTTTTCGTTTCG  | CTTCTTTCTCCATCTCCATT   | 54,55.12    | 147 |
| CakTSSR03231 | CakTC35566 | (CAG)5   | 2733 | 2747 | --         | --          | CAATTCAAACAACAATATCAGC | CATCATTCAATTGGTGAAGTT  | 55.02,55.06 | 145 |
| CakTSSR03232 | CakTC35586 | (CTCAA)5 | 24   | 48   | --         | --          |                        |                        |             |     |
| CakTSSR03233 | CakTC35594 | (AC)6    | 124  | 135  | --         | --          | GTC TGGTCTTAACCTGGAATC | ATAGAACAAATAGCCCCAATC  | 55.3,54.97  | 154 |
| CakTSSR03234 | CakTC35600 | (GA)9    | 3317 | 3334 | --         | TPR         |                        |                        |             |     |
| CakTSSR03235 | CakTC35618 | (AAC)6   | 495  | 512  | --         | Jumonji     | TGGAAAGAGAAGTTGAAAAGA  | CCATTGGTAATTCTTTCCTC   | 54.39,55.4  | 157 |
| CakTSSR03236 | CakTC35624 | (AAG)7   | 1092 | 1112 | --         | --          |                        |                        |             |     |
| CakTSSR03237 | CakTC35628 | (CTC)6   | 278  | 295  | --         | --          | CCTAACTAGGGCTCAACTTTC  | TCTTGAAGACGGTTCATAAA   | 55,55.19    | 143 |
| CakTSSR03238 | CakTC35635 | (AT)9    | 239  | 256  | --         | --          | TCACTACCAAAAAGAGAGAGGA | ATAATTTTGGCTGACATGTTG  | 54.22,55.27 | 145 |
| CakTSSR03239 | CakTC35640 | (ATG)6   | 3332 | 3349 | --         | --          | TTCACCTCCAAACCTAATCCT  | ATTCTTCGCAATCACTCTTTC  | 55.47,56.18 | 152 |
| CakTSSR03240 | CakTC35642 | (GTG)7   | 267  | 287  | --         | --          | GTTTTCCCTTCAAGAAATT    | GTAAAACCTACCAACCCAAAC  | 54.96,55.27 | 150 |
| CakTSSR03241 | CakTC35649 | (TC)6    | 152  | 163  | --         | --          | TTAAAAACAGAGAGAGCCAAA  | GTAGGATTTCAGACAGAGGTG  | 54.62,53.9  | 155 |
| CakTSSR03242 | CakTC35649 | (TAG)5   | 3106 | 3120 | --         | --          | CTGCAATTATTTTGGGAAGATG | GTATTGAACAAAATGGTCTCG  | 55.1,54.83  | 150 |
| CakTSSR03243 | CakTC35651 | (GA)6    | 1671 | 1682 | --         | --          | TGTCAATCGAGAGTTGGTTAC  | CCTTTTAGCACCCCTTCTTATT | 55.3,54.59  | 147 |
| CakTSSR03244 | CakTC35657 | (CTT)5   | 271  | 285  | --         | --          | CTGAAATCTGCAATAATCGAC  | TATACTTGGGAACAAGGAACA  | 55.07,54.84 | 151 |
| CakTSSR03245 | CakTC35665 | (TAA)7   | 231  | 251  | --         | --          | TTATCCATCTTACCCCTTAAT  | AGCCAAAAAGTCTGATTCTT   | 52.29,54.96 | 146 |
| CakTSSR03246 | CakTC35676 | (TCT)6   | 341  | 358  | --         | --          | CTAAGTTTCCTGTTGCAGCTA  | TCCTTATTGTCACAACACCTC  | 55.15,55.13 | 156 |
| CakTSSR03247 | CakTC35678 | (TCTT)6  | 204  | 227  | --         | TPR         | ATTCCAACAACACTCACATTC  | CGAAGAAGACATGAAGAAGAA  | 54.95,54.82 | 145 |
| CakTSSR03248 | CakTC35684 | (CAC)8   | 435  | 458  | --         | SBP         | CTAAAGAAATGGAATTGGGATT | CTCGTTTGTGTTGCTCTATTGT | 54.95,54.82 | 153 |
| CakTSSR03249 | CakTC35690 | (GCC)5   | 3182 | 3196 | --         | --          | TTCTGTGCTTGTGTTGTTTA   | CAGAGGTAGTTCCTCATCCTC  | 54.6,55.46  | 150 |
| CakTSSR03250 | CakTC35694 | (AG)9    | 691  | 708  | --         | --          |                        |                        |             |     |
| CakTSSR03251 | CakTC35705 | (ATG)5   | 3274 | 3288 | --         | --          | CAACAAATGAGGGAAC TTGTA | GTTGTGGAGGAACTGATTCT   | 55.32,55.79 | 166 |
| CakTSSR03252 | CakTC35707 | (GAC)5   | 2119 | 2133 | --         | Bromodomain | GGATACAAC TATGGAATGAA  | TTCACGTACCTTGTCTAAATC  | 54.98,54.77 | 145 |

|              |            |           |      |      |             |             |                        |                        |             |     |
|--------------|------------|-----------|------|------|-------------|-------------|------------------------|------------------------|-------------|-----|
| CakTSSR03253 | CakTC35722 | (AGA)6    | 4169 | 4186 | Mature Leaf | --          | AGTACATGATCGGTGAGTGAA  | CTCATTCTTCATTCTGCAAGT  | 55.6,54.67  | 152 |
| CakTSSR03254 | CakTC35737 | (ACT)6    | 226  | 243  | --          | --          | TTCAATTAGTTCCAACAGCTC  | TATTAGAAAAACGAAAGCGACA | 54.7,55.48  | 146 |
| CakTSSR03255 | CakTC35745 | (AAGAGA)5 | 2725 | 2754 | --          | Alfin-like  | CTGCTTTAGTGAATTGGTTG   | ATTTAATTTTGGGAGCAACA   | 55.24,54.92 | 144 |
| CakTSSR03256 | CakTC35748 | (CTT)5    | 350  | 364  | --          | --          | TGTTTCTTCTCAACCGTAAGA  | TGGTGGTTAAAAAGTATGTGG  | 55.19,55.21 | 151 |
| CakTSSR03257 | CakTC35749 | (TCA)7    | 3068 | 3088 | --          | --          | CTTCACTTCCCTCTTCTTCAT  | TGATCCTGAGATTATCCTGA   | 55.18,54.77 | 152 |
| CakTSSR03258 | CakTC35752 | (ATG)6    | 144  | 161  | --          | --          | GGTTCCTTTTCTCTTATTCTG  | CATCACCATCACCATTATCTT  | 54.91,54.85 | 155 |
| CakTSSR03259 | CakTC35755 | (GA)7     | 1282 | 1295 | --          | --          | TGACCATAAGAATGGAATTTG  | TAAATCATGATGGGATTCAG   | 55.17,55.09 | 133 |
| CakTSSR03260 | CakTC35758 | (CAG)5    | 2300 | 2314 | --          | ARF         | TTACAAACGCCGCTAAAC     | CTGTGTGTGTGTGTGTGATG   | 55.05,55.04 | 168 |
| CakTSSR03261 | CakTC35758 | (CAA)5    | 2417 | 2431 | --          | ARF         | CCCAACAGACTCAACAGAAT   | TACTGGTGTGTGTACACACTG  | 55.1,54.8   | 146 |
| CakTSSR03262 | CakTC35770 | (TG)7     | 3852 | 3865 | --          | --          |                        |                        |             |     |
| CakTSSR03263 | CakTC35785 | (AG)6     | 3467 | 3478 | --          | --          |                        |                        |             |     |
| CakTSSR03264 | CakTC35787 | (AAT)5    | 77   | 91   | --          | --          |                        |                        |             |     |
| CakTSSR03265 | CakTC35792 | (AT)6     | 298  | 309  | --          | --          |                        |                        |             |     |
| CakTSSR03266 | CakTC35803 | (ACC)10   | 260  | 289  | --          | --          | ATGAATGAATCCCTTAAATC   | GGTCATTAACGTTATCACGAG  | 54.71,54.86 | 152 |
| CakTSSR03267 | CakTC35806 | (TC)8     | 261  | 276  | --          | --          | ACCCTCACAAATTCACAACTA  | GGCTAACCTGTGTGTGTAAAA  | 54.72,55.42 | 151 |
| CakTSSR03268 | CakTC35808 | (ACC)5    | 212  | 226  | --          | --          | GCTGTTCTTCTTTCAITTC    | GACTAGAGAAAGTGGGAGGAG  | 55.74,54.77 | 149 |
| CakTSSR03269 | CakTC35816 | (GCA)6    | 61   | 78   | Flower bud  | MYB-related |                        |                        |             |     |
| CakTSSR03270 | CakTC35820 | (GGT)5    | 87   | 101  | --          | --          |                        |                        |             |     |
| CakTSSR03271 | CakTC35824 | (TGT)5    | 330  | 344  | Young_pod   | --          | GTTGAAGAAGAAGCAAGTTGA  | CAGTTTGAGAGCCAAAGAATA  | 54.89,54.88 | 150 |
| CakTSSR03272 | CakTC35837 | (TAT)7    | 125  | 145  | --          | --          | AAGAAACATACCAAATTC AAC | ATATCATGTATTGGGGTGTG   | 54.95,54.74 | 157 |
| CakTSSR03273 | CakTC35859 | (CAT)5    | 287  | 301  | --          | --          | TTTGAGGAGAAGACACACAAT  | TTTGTGTGATTAAGGTTGTT   | 54.83,54.75 | 149 |
| CakTSSR03274 | CakTC35871 | (TC)8     | 41   | 56   | --          | --          |                        |                        |             |     |
| CakTSSR03275 | CakTC35883 | (CT)14    | 3341 | 3368 | --          | --          |                        |                        |             |     |
| CakTSSR03276 | CakTC35891 | (TCT)5    | 382  | 396  | --          | --          | ATGATTGTGGAATAGCAGTG   | CACATAGTCCAACTCCAATC   | 55.26,54.64 | 151 |
| CakTSSR03277 | CakTC35898 | (CAT)5    | 2315 | 2329 | --          | --          | AGTTTCAATTTGTCTTGACG   | CCAAAGATGTGTATGAGGAAG  | 54.63,54.82 | 161 |
| CakTSSR03278 | CakTC35898 | (TCT)5    | 5222 | 5236 | --          | --          | GATATTATTGTCTCCAGCAA   | GTTGATGACATTGAGGAAGAA  | 54.44,55.18 | 147 |
| CakTSSR03279 | CakTC35900 | (TA)6     | 9    | 20   | --          | --          |                        |                        |             |     |
| CakTSSR03280 | CakTC35922 | (TTC)5    | 418  | 432  | --          | --          | ATTACATCTGTCCCCATTCT   | GCTTCACTTATTCCTTTGTGA  | 55.11,54.7  | 155 |
| CakTSSR03281 | CakTC35926 | (AACTC)5  | 22   | 46   | --          | --          |                        |                        |             |     |
| CakTSSR03282 | CakTC35935 | (GAA)5    | 100  | 114  | --          | --          |                        |                        |             |     |
| CakTSSR03283 | CakTC35950 | (AGAA)6   | 402  | 425  | --          | --          | GAAGAGTATTGGATCCCACTT  | CAGACCAAAAACAATAACCAT  | 54.82,54.29 | 150 |
| CakTSSR03284 | CakTC35953 | (AG)6     | 32   | 43   | --          | --          |                        |                        |             |     |
| CakTSSR03285 | CakTC35958 | (TAA)7    | 369  | 389  | --          | --          | ATTCCACTCTCTTCTCCATTC  | GAAACATAACCCATAAAGAAA  | 54.92,55.06 | 159 |
| CakTSSR03286 | CakTC35960 | (ATTGTT)5 | 1373 | 1402 | --          | bHLH        | CAAAACTCAGAATCTCACCAG  | TCACAGAAGCAGAATCAAAGT  | 55.01,55.17 | 148 |
| CakTSSR03287 | CakTC35960 | (GTT)6    | 1575 | 1592 | --          | bHLH        | CTTGGAATTGAAATTGAAGTG  | GCAGTTAGGGTTAGGTCTTC   | 54.97,54.84 | 156 |
| CakTSSR03288 | CakTC35960 | (AG)6     | 2552 | 2563 | --          | bHLH        | AAAACAAGATGACAACCTCAC  | TCTCAAATTCACCTAAATGC   | 54.24,54.65 | 146 |
| CakTSSR03289 | CakTC35964 | (AAC)6    | 434  | 451  | Shoot       | WRKY        | CCAAATTAGCTCAAACACAAG  | TGAAGAGAGATTTCAACTGG   | 55.24,54.65 | 152 |

|              |            |          |      |      |             |     |                       |                       |             |     |
|--------------|------------|----------|------|------|-------------|-----|-----------------------|-----------------------|-------------|-----|
| CakTSSR03290 | CakTC35975 | (GA)6    | 4549 | 4560 | --          | --  |                       |                       |             |     |
| CakTSSR03291 | CakTC35977 | (GGA)9   | 1    | 27   | Flower bud  | --  |                       |                       |             |     |
| CakTSSR03292 | CakTC35990 | (ATG)5   | 352  | 366  | Mature Leaf | --  | CTTCTTAAGGTCGGAAGAC   | TCACCACAATTCTCATTTTC  | 54.97,55.19 | 159 |
| CakTSSR03293 | CakTC36003 | (GA)7    | 60   | 73   | --          | --  |                       |                       |             |     |
| CakTSSR03294 | CakTC36006 | (GAA)10  | 3113 | 3142 | --          | --  |                       |                       |             |     |
| CakTSSR03295 | CakTC36008 | (AAC)6   | 196  | 213  | --          | --  | AAACAAAGACATGAGTGATGG | AATTAGAACCCCATGACATT  | 55.13,55.12 | 149 |
| CakTSSR03296 | CakTC36011 | (TC)19   | 21   | 58   | --          | --  |                       |                       |             |     |
| CakTSSR03297 | CakTC36011 | (TTA)5   | 279  | 293  | --          | --  | CTTCCCCAACACACTTTTAT  | ACCGAAGTTGAAATAACCAA  | 55.82,54.82 | 158 |
| CakTSSR03298 | CakTC36016 | (TCT)7   | 2903 | 2923 | --          | --  |                       |                       |             |     |
| CakTSSR03299 | CakTC36019 | (CCCT)5  | 281  | 300  | --          | SBP | TCCTTCTCTTTTCTCTCCAC  | CTTCAGAAGAAGAGTTGCTTG | 55.31,54.64 | 151 |
| CakTSSR03300 | CakTC36020 | (AT)8    | 130  | 145  | --          | --  | CACTAAATCTCACCGTTGACT | TTGGAAGTTAAGAATGGACCT | 54.46,55.47 | 175 |
| CakTSSR03301 | CakTC36021 | (TAA)5   | 475  | 489  | --          | --  | ACCGCTTACTCTCACTTCTT  | CTGTTAAGGGCAAAATGTAA  | 55.05,54.8  | 139 |
| CakTSSR03302 | CakTC36022 | (TGC)5   | 2060 | 2074 | --          | --  | CATCATATGGACGCTTACAC  | GCAACAACAAATCTTTCAGTC | 55.71,55.01 | 152 |
| CakTSSR03303 | CakTC36030 | (AAG)5   | 111  | 125  | --          | --  | TGGCACTTTGGAGTACTTATC | TTTTACCCCACTTAGTGAAGA | 54.58,54.18 | 160 |
| CakTSSR03304 | CakTC36039 | (TCA)5   | 2072 | 2086 | --          | --  | TCGATATCTTCTTGTGGAAG  | GCTTCAATCAAACTAAGCAA  | 54.63,55.04 | 148 |
| CakTSSR03305 | CakTC36060 | (GAA)11  | 141  | 173  | Flower bud  | --  | AAGAGAAAAAGCATGGAGAGT | CTGTTGACAACTGAGAAGAGC | 54.94,55.24 | 145 |
| CakTSSR03306 | CakTC36072 | (TG)8    | 5420 | 5435 | --          | --  |                       |                       |             |     |
| CakTSSR03307 | CakTC36073 | (TTG)5   | 60   | 74   | --          | --  |                       |                       |             |     |
| CakTSSR03308 | CakTC36073 | (GTT)6   | 408  | 425  | --          | --  |                       |                       |             |     |
| CakTSSR03309 | CakTC36082 | (TTG)5   | 2578 | 2592 | --          | --  |                       |                       |             |     |
| CakTSSR03310 | CakTC36085 | (GA)8    | 175  | 190  | --          | --  | AAGTGTTGTAGGCAATGTGT  | TAGACATCTTAGGCCATCAG  | 54.83,54.67 | 156 |
| CakTSSR03311 | CakTC36111 | (ATG)7   | 75   | 95   | --          | --  |                       |                       |             |     |
| CakTSSR03312 | CakTC36126 | (AG)9    | 16   | 33   | --          | ARF |                       |                       |             |     |
| CakTSSR03313 | CakTC36134 | (AAC)5   | 127  | 141  | --          | --  | ACCAGATTAAGGGACTTTCAA | CCCCAGTAAACATCAATATCA | 55.47,55.05 | 163 |
| CakTSSR03314 | CakTC36140 | (ATC)5   | 570  | 584  | --          | --  | ATTGAACTCCCCTCTTTTC   | CAGCTCTAAAAGATGACCAAA | 54.93,54.88 | 162 |
| CakTSSR03315 | CakTC36142 | (AG)6    | 38   | 49   | --          | --  |                       |                       |             |     |
| CakTSSR03316 | CakTC36170 | (ATTAC)5 | 88   | 117  | --          | --  |                       |                       |             |     |
| CakTSSR03317 | CakTC36179 | (GA)19   | 2716 | 2753 | --          | --  | GGTGATTGAGATTGGAGAT   | ATATGATCTATCCTCGCCAGT | 55.63,55.38 | 155 |
| CakTSSR03318 | CakTC36192 | (TGT)5   | 467  | 481  | --          | --  | GATTGGTATGTGACAGTGGTT | ATTCAATTCTCTCAACAACA  | 54.81,54.77 | 157 |
| CakTSSR03319 | CakTC36197 | (GA)7    | 2888 | 2901 | --          | --  | AGGGTTGTTTAAAAGACTGG  | CTATCCCCAATTGTGTGATT  | 55.17,55.67 | 156 |
| CakTSSR03320 | CakTC36200 | (TGA)5   | 3613 | 3627 | --          | --  | GGAGGATGTCAGAGGAGATAC | CAGATTGAAGTTCACAAGAGG | 55.2,55.01  | 164 |
| CakTSSR03321 | CakTC36201 | (TC)8    | 134  | 149  | --          | --  | TTAGGGTTTGGTTAATGTTG  | GATCAAAACGACAGCGTATAG | 54.5,55.18  | 142 |
| CakTSSR03322 | CakTC36201 | (GTG)5   | 656  | 670  | --          | --  | GGTGATGAATCAGGGTTTCT  | TCTCTGCTCCTCAATTCAT   | 54.82,54.98 | 159 |
| CakTSSR03323 | CakTC36201 | (GGA)5   | 961  | 975  | --          | --  | TTAGTAGCGTTGGTACTGGAG | ACCTCACCTCCTTAACCTGTC | 54.87,54.96 | 162 |
| CakTSSR03324 | CakTC36222 | (GGT)5   | 3095 | 3109 | --          | --  | TTGATGATGTGAGGGTAAATC | CCACAAACAATGTAACTCCT  | 54.98,54.34 | 158 |
| CakTSSR03325 | CakTC36227 | (AG)9    | 63   | 80   | --          | --  |                       |                       |             |     |
| CakTSSR03326 | CakTC36238 | (TC)9    | 75   | 92   | --          | C3H |                       |                       |             |     |

|              |            |           |      |      |           |     |                        |                        |             |     |
|--------------|------------|-----------|------|------|-----------|-----|------------------------|------------------------|-------------|-----|
| CakTSSR03327 | CakTC36253 | (AGC)5    | 367  | 381  | --        | --  | TTCATTGCAAGAAAGTCATCT  | TTAAATCGAAACACGAAAGTC  | 55.1,54.73  | 145 |
| CakTSSR03328 | CakTC36266 | (CAA)6    | 258  | 275  | --        | --  | TCITTTCCACAGATCATCAGAC | GAAGTTCTGCATATGATGCTT  | 55.16,54.64 | 149 |
| CakTSSR03329 | CakTC36267 | (TC)6     | 3048 | 3059 | --        | --  |                        |                        |             |     |
| CakTSSR03330 | CakTC36272 | (AAC)12   | 503  | 538  | --        | --  | GAGAGATATGCTCAAGAGTGG  | ATCCCAAACGTCTTAAAGATT  | 54.15,54.63 | 149 |
| CakTSSR03331 | CakTC36281 | (AGAAAG)6 | 177  | 212  | --        | --  | CGTATTTTGGTCTTTTCCTTT  | AAAGAGAACGAACTGAGGTCT  | 55.25,54.84 | 163 |
| CakTSSR03332 | CakTC36282 | (TCA)6    | 251  | 268  | --        | --  | TAGAAACTTGTGGTGGAGATG  | ACCCAACTTGTACCTACCAT   | 55.31,55.14 | 155 |
| CakTSSR03333 | CakTC36286 | (GAT)6    | 785  | 802  | --        | --  | AGAAAAAGGCATCCAATTAAG  | TGCTGAGAATCAACTTCAAAT  | 55.33,55.1  | 167 |
| CakTSSR03334 | CakTC36288 | (TG)10    | 4675 | 4694 | --        | --  |                        |                        |             |     |
| CakTSSR03335 | CakTC36289 | (TCT)6    | 74   | 91   | --        | C3H |                        |                        |             |     |
| CakTSSR03336 | CakTC36304 | (TC)11    | 1    | 22   | --        | --  |                        |                        |             |     |
| CakTSSR03337 | CakTC36306 | (TTG)5    | 318  | 332  | --        | --  | GCACACAAACAACTTGAAAT   | GAGAACATTGATAATGGTGGA  | 55.38,54.98 | 160 |
| CakTSSR03338 | CakTC36306 | (TC)9     | 3047 | 3064 | --        | --  |                        |                        |             |     |
| CakTSSR03339 | CakTC36315 | (CCA)6    | 577  | 594  | --        | --  | GAGGTGATGAAAAGGAGATT   | GTAGAAACCGTTCAAGAAAGC  | 54.95,55.84 | 149 |
| CakTSSR03340 | CakTC36329 | (TC)6     | 15   | 26   | --        | --  |                        |                        |             |     |
| CakTSSR03341 | CakTC36338 | (TC)10    | 109  | 128  | --        | --  | ACCTCCAATCAAATCACTTTT  | AATATCCATCAACCAGCTACA  | 55.31,54.78 | 150 |
| CakTSSR03342 | CakTC36341 | (TA)7     | 65   | 78   | --        | --  |                        |                        |             |     |
| CakTSSR03343 | CakTC36369 | (CT)7     | 78   | 91   | --        | --  |                        |                        |             |     |
| CakTSSR03344 | CakTC36401 | (TC)7     | 2883 | 2896 | --        | HB  | GTGAGTGAGAATCGAAGATGA  | TTAAGTGAAAACCTGAGGCAAC | 55.34,54.79 | 145 |
| CakTSSR03345 | CakTC36401 | (AG)6     | 3140 | 3151 | --        | HB  |                        |                        |             |     |
| CakTSSR03346 | CakTC36416 | (TAT)6    | 10   | 27   | --        | --  |                        |                        |             |     |
| CakTSSR03347 | CakTC36417 | (CT)6     | 112  | 123  | --        | --  | GAAGAAACCCATTAAGTAGCTG | GAAGGGTACAGAGACGGTTAC  | 55.03,55.41 | 150 |
| CakTSSR03348 | CakTC36432 | (TA)6     | 66   | 77   | --        | --  |                        |                        |             |     |
| CakTSSR03349 | CakTC36434 | (AG)6     | 3111 | 3122 | --        | --  |                        |                        |             |     |
| CakTSSR03350 | CakTC36436 | (AG)10    | 3192 | 3211 | --        | --  |                        |                        |             |     |
| CakTSSR03351 | CakTC36452 | (AG)6     | 473  | 484  | --        | --  |                        |                        |             |     |
| CakTSSR03352 | CakTC36464 | (CAT)5    | 2056 | 2070 | --        | --  | TTGTTGTCTAACACCACTTCC  | GGGGGAGTTTAAAGAGTAATG  | 55.22,54.64 | 149 |
| CakTSSR03353 | CakTC36464 | (AAC)7    | 2705 | 2725 | --        | --  | TGTCTAGGGTGCATACTGTTT  | TTGGGTGTAGTTTTGTGTTT   | 54.93,54.84 | 157 |
| CakTSSR03354 | CakTC36467 | (ATG)7    | 599  | 619  | --        | --  | TGAGAAACTGAAGAAATTTGG  | AAACCCACCTTTTGTATTAGG  | 54.68,54.99 | 149 |
| CakTSSR03355 | CakTC36473 | (CA)9     | 67   | 84   | --        | --  |                        |                        |             |     |
| CakTSSR03356 | CakTC36486 | (TTTT)7   | 26   | 60   | Young_pod | --  |                        |                        |             |     |
| CakTSSR03357 | CakTC36504 | (CTT)17   | 283  | 333  | Young_pod | --  | CATCTTCATCCATACACCCTA  | GATAAACCCATAATCATGCTG  | 55.03,54.72 | 165 |
| CakTSSR03358 | CakTC36504 | (GAA)6    | 1020 | 1037 | Young_pod | --  | AATCAGGGGTGTTACTGGTAT  | TGAAAGAGTGGCTAAGCTAAA  | 55.06,54.81 | 145 |
| CakTSSR03359 | CakTC36512 | (TA)7     | 435  | 448  | --        | --  |                        |                        |             |     |
| CakTSSR03360 | CakTC36519 | (CAT)9    | 358  | 384  | Young_pod | --  | AGAAGATGTCGTCGATCAATA  | CTTGAATCTCACACGCTACTC  | 54.88,55.2  | 158 |
| CakTSSR03361 | CakTC36534 | (TC)13    | 127  | 152  | --        | --  | GTGGATGTTTCATTACTCAA   | TCGAAGTAAATTGGTGAGTGT  | 55.06,54.89 | 173 |
| CakTSSR03362 | CakTC36541 | (TC)19    | 161  | 198  | --        | --  | AATAATCTTCGTCAAACCACA  | GGGAAGTAGTTGAGAACCTGT  | 54.83,54.96 | 142 |
| CakTSSR03363 | CakTC36549 | (AT)8     | 420  | 435  | --        | --  | ACAATTTAAACACACCCACAC  | GGTTTAAAATCTGTTGTCGTG  | 54.93,54.91 | 137 |

|              |            |         |      |      |           |            |                       |                       |             |     |
|--------------|------------|---------|------|------|-----------|------------|-----------------------|-----------------------|-------------|-----|
| CakTSSR03364 | CakTC36559 | (TTA)12 | 2369 | 2404 | --        | --         | GAAAACGAAGGAGACCTACTC | CTCTACGATGGTGGTTTGTGA | 54.78,55.36 | 148 |
| CakTSSR03365 | CakTC36561 | (AG)6   | 2768 | 2779 | --        | --         |                       |                       |             |     |
| CakTSSR03366 | CakTC36562 | (CCA)6  | 518  | 535  | --        | --         |                       |                       |             |     |
| CakTSSR03367 | CakTC36563 | (AG)6   | 6701 | 6712 | --        | --         |                       |                       |             |     |
| CakTSSR03368 | CakTC36564 | (GGT)5  | 2915 | 2929 | --        | --         | TGATGATGTCCAAAAGAGTTC | TGTGCTTTTATGAGGAAATGT | 55.18,54.99 | 162 |
| CakTSSR03369 | CakTC36592 | (TTC)5  | 76   | 90   | --        | --         |                       |                       |             |     |
| CakTSSR03370 | CakTC36596 | (TC)8   | 7    | 22   | --        | --         |                       |                       |             |     |
| CakTSSR03371 | CakTC36601 | (TGA)5  | 2958 | 2972 | --        | --         | GAGGAAGAAGCTGAAGATGAT | CTGTTCAGCCAACTTTCTAAG | 55.25,54.55 | 150 |
| CakTSSR03372 | CakTC36621 | (AAG)5  | 68   | 82   | --        | --         |                       |                       |             |     |
| CakTSSR03373 | CakTC36629 | (TG)6   | 1053 | 1064 | --        | --         |                       |                       |             |     |
| CakTSSR03374 | CakTC36662 | (TC)6   | 65   | 76   | --        | --         |                       |                       |             |     |
| CakTSSR03375 | CakTC36662 | (GAT)5  | 265  | 279  | --        | --         | CGAATCAGAAGAAAACAGAGA | ACTTCTCCATTAACACTTCC  | 54.82,54.9  | 153 |
| CakTSSR03376 | CakTC36668 | (GAA)5  | 502  | 516  | Shoot     | --         | TATGTCAAAGTTTGGCTCAAG | CAAGTGTTTGTGAATTCCTTT | 55.64,54.46 | 159 |
| CakTSSR03377 | CakTC36676 | (TC)7   | 418  | 431  | --        | --         | TCTCTAAATCCACCACCTTCA | CTAACCAGTGTGAAACAAAC  | 54.95,54.97 | 161 |
| CakTSSR03378 | CakTC36683 | (GAC)5  | 2804 | 2818 | --        | --         | AATTGCCAGTAGAGGCTTTAG | AGTTAGAAAGCCGTCATATC  | 55.57,55.19 | 152 |
| CakTSSR03379 | CakTC36721 | (GA)11  | 1    | 22   | Young_pod | --         |                       |                       |             |     |
| CakTSSR03380 | CakTC36731 | (GA)8   | 533  | 548  | --        | --         | CCATAAGAAGAAAAGGGTAGG | GTGTTTGTTCATTGTTCCTTT | 54.81,54.28 | 154 |
| CakTSSR03381 | CakTC36739 | (GTC)6  | 2645 | 2662 | --        | --         | GTATGGATCTTCTGAGCTTC  | CACTCTTGTTGAAAATGGA   | 55.54,55.45 | 169 |
| CakTSSR03382 | CakTC36746 | (GCA)5  | 2263 | 2277 | --        | --         | TACTCGTCCCATTTGTACATC | GCTGTTGGTGACCTAATTTTT | 55.1,55.96  | 162 |
| CakTSSR03383 | CakTC36754 | (CGG)5  | 109  | 123  | --        | --         | TGAGAGGAGAAGTAGTGACGA | GCTAAGCCATTTGATTTAACA | 55.17,54.86 | 148 |
| CakTSSR03384 | CakTC36758 | (AGA)5  | 1129 | 1143 | --        | --         | TATACACTTGGCAAGAGAAGG | CCCAGTACTTCTCAACAACAG | 54.75,54.97 | 138 |
| CakTSSR03385 | CakTC36765 | (AAT)5  | 1044 | 1058 | --        | bHLH       | CAGTATTAGCCACGTTTCCTA | TATCTCAGACTCTCCACAA   | 54.81,54.92 | 172 |
| CakTSSR03386 | CakTC36770 | (AAC)5  | 18   | 32   | --        | --         |                       |                       |             |     |
| CakTSSR03387 | CakTC36774 | (ACA)9  | 139  | 165  | --        | --         | ATCAAGTTTCTTCCATTTTCC | CTCTTAGAGGAGGAGAAGGTG | 54.97,54.94 | 146 |
| CakTSSR03388 | CakTC36774 | (GAA)7  | 342  | 362  | --        | --         |                       |                       |             |     |
| CakTSSR03389 | CakTC36776 | (TA)9   | 2656 | 2673 | --        | --         |                       |                       |             |     |
| CakTSSR03390 | CakTC36792 | (CA)7   | 44   | 57   | --        | --         |                       |                       |             |     |
| CakTSSR03391 | CakTC36796 | (TTA)7  | 17   | 37   | --        | --         |                       |                       |             |     |
| CakTSSR03392 | CakTC36803 | (GAA)5  | 156  | 170  | --        | --         | TAGAAGAAGCAATGTTGGAAG | CAATACAAGAATGGCAAAGAA | 54.88,55.57 | 151 |
| CakTSSR03393 | CakTC36825 | (GA)6   | 2649 | 2660 | --        | Alfin-like |                       |                       |             |     |
| CakTSSR03394 | CakTC36828 | (TC)6   | 17   | 28   | --        | --         |                       |                       |             |     |
| CakTSSR03395 | CakTC36839 | (GA)7   | 2728 | 2741 | --        | --         |                       |                       |             |     |
| CakTSSR03396 | CakTC36848 | (TC)7   | 69   | 82   | --        | --         |                       |                       |             |     |
| CakTSSR03397 | CakTC36851 | (TC)7   | 489  | 502  | --        | --         |                       |                       |             |     |
| CakTSSR03398 | CakTC36863 | (TC)7   | 2641 | 2654 | --        | --         |                       |                       |             |     |
| CakTSSR03399 | CakTC36887 | (GTT)5  | 296  | 310  | --        | --         | GAAGAATGATTGGCTTAACA  | TTGCTATCTCAAAAATGGAAG | 54.65,54.82 | 148 |
| CakTSSR03400 | CakTC36890 | (ATC)7  | 2381 | 2401 | --        | --         | CAGAAATCGGAATGAAAGACT | TCAAACCTCACTTCAGAGGAA | 56.03,55.14 | 147 |

|              |            |         |      |      |       |     |                         |                       |             |     |
|--------------|------------|---------|------|------|-------|-----|-------------------------|-----------------------|-------------|-----|
| CakTSSR03401 | CakTC36903 | (ATG)5  | 117  | 131  | --    | HB  | AATTCAGGTCTACAAAATCC    | GAGCAGTGTGCCTATGATATT | 54.84,54.51 | 151 |
| CakTSSR03402 | CakTC36905 | (AG)6   | 99   | 110  | --    | C3H |                         |                       |             |     |
| CakTSSR03403 | CakTC36905 | (CAT)5  | 2505 | 2519 | --    | C3H | AGAGAAGAATCAGAGGAAGTCA  | CGTGAGTTTTGGTAAATGAGT | 54.9,54.5   | 156 |
| CakTSSR03404 | CakTC36911 | (ATG)6  | 620  | 637  | --    | --  | ACATGCTTGTGTGATTCTTTGT  | TCTGATGATAGCATACCCAGT | 54.88,54.75 | 154 |
| CakTSSR03405 | CakTC36913 | (AG)21  | 2658 | 2699 | --    | --  |                         |                       |             |     |
| CakTSSR03406 | CakTC36924 | (AAG)5  | 502  | 516  | --    | --  |                         |                       |             |     |
| CakTSSR03407 | CakTC36929 | (TC)9   | 99   | 116  | --    | --  |                         |                       |             |     |
| CakTSSR03408 | CakTC36936 | (AT)7   | 340  | 353  | --    | --  |                         |                       |             |     |
| CakTSSR03409 | CakTC36942 | (TTA)6  | 167  | 184  | --    | --  | TTTGTGAGTGAGAGAAAGAGC   | CCATTAATTCGAGAGTGAAGA | 54.87,54.63 | 142 |
| CakTSSR03410 | CakTC36944 | (GA)10  | 4187 | 4206 | --    | --  |                         |                       |             |     |
| CakTSSR03411 | CakTC36948 | (AAG)5  | 246  | 260  | --    | --  | GATTTTTGGGAAAGATCATGT   | TTGTGGGAGTTCTCACTCTTA | 55.63,55.01 | 151 |
| CakTSSR03412 | CakTC36953 | (CAA)7  | 585  | 605  | --    | --  | TATTCTACCTTGGAGGGAATC   | AAGACGCTGTTACCTTCATT  | 54.93,55.72 | 148 |
| CakTSSR03413 | CakTC36953 | (GAA)5  | 1006 | 1020 | --    | --  | CAAAAGTGGAGAAAATACCG    | GCACTGACAAATTGTTTCTTC | 54.99,55.01 | 156 |
| CakTSSR03414 | CakTC36953 | (AAT)7  | 1669 | 1689 | --    | --  |                         |                       |             |     |
| CakTSSR03415 | CakTC36992 | (AAG)5  | 91   | 105  | --    | --  |                         |                       |             |     |
| CakTSSR03416 | CakTC37006 | (TA)13  | 1    | 26   | --    | --  |                         |                       |             |     |
| CakTSSR03417 | CakTC37009 | (CGG)5  | 315  | 329  | --    | --  | GATTCTCTCCATTTCCTCATC   | AGAGAATTCTTGACCAGAAGG | 55.26,55.18 | 154 |
| CakTSSR03418 | CakTC37025 | (TTG)5  | 489  | 503  | --    | --  |                         |                       |             |     |
| CakTSSR03419 | CakTC37041 | (CCA)5  | 1747 | 1761 | --    | --  | GGCGATCTAAAATTTTCTCTT   | TCATTCTGCTTTTGTAGGAC  | 54.61,54.7  | 141 |
| CakTSSR03420 | CakTC37042 | (GTT)5  | 2573 | 2587 | --    | --  | AGCACATTACAGATAGCGAGA   | ATCACGATCTTCAACATCAAC | 55.33,55.03 | 160 |
| CakTSSR03421 | CakTC37046 | (TTA)12 | 308  | 343  | --    | --  |                         |                       |             |     |
| CakTSSR03422 | CakTC37047 | (TG)10  | 2692 | 2711 | --    | --  |                         |                       |             |     |
| CakTSSR03423 | CakTC37048 | (TC)11  | 116  | 137  | --    | --  | TAAGAGCACATACGGTTTTGT   | GAATCATGTCAACCATTTTG  | 55.11,55.48 | 151 |
| CakTSSR03424 | CakTC37054 | (TG)6   | 15   | 26   | --    | --  |                         |                       |             |     |
| CakTSSR03425 | CakTC37064 | (TTG)5  | 2132 | 2146 | --    | --  |                         |                       |             |     |
| CakTSSR03426 | CakTC37068 | (TCA)5  | 664  | 678  | --    | --  | AATCCTCTGCATTCTTTCTCT   | GAAGAAAGAGGTGTGTTGAAA | 54.86,54.56 | 153 |
| CakTSSR03427 | CakTC37068 | (AGA)5  | 2031 | 2045 | --    | --  | AGCTTTTGATGGTTTTGACT    | CAACAAGTAGTTCACATGCAA | 55.69,54.88 | 158 |
| CakTSSR03428 | CakTC37070 | (GAA)5  | 239  | 253  | --    | --  | CCTCAATTCATTCTCAAGACA   | CAAACATGTTGGTTTCATAGG | 55.36,55.61 | 150 |
| CakTSSR03429 | CakTC37094 | (AAC)6  | 208  | 225  | --    | --  | GGCTATCCATCAACAACATAA   | AAGTGAACAACAGCAATGTTT | 55.19,54.96 | 150 |
| CakTSSR03430 | CakTC37100 | (AT)7   | 5    | 18   | Shoot | --  |                         |                       |             |     |
| CakTSSR03431 | CakTC37102 | (AT)6   | 155  | 166  | --    | --  | TCCATCATGGTTCTACTTATTCT | GCCGAAACTTCGCTTTATTA  | 54.66,56.33 | 164 |
| CakTSSR03432 | CakTC37103 | (TC)6   | 181  | 192  | --    | --  | AGATTCAATCCACAAGTGAAG   | CAAGGAATATCCAGAAAAGGT | 54.34,55.01 | 147 |
| CakTSSR03433 | CakTC37120 | (AAG)10 | 1480 | 1509 | --    | --  | GGCTAGGCTTTTATCTTCAAC   | TATATGAACAATGCTCGTCCT | 55.08,54.94 | 140 |
| CakTSSR03434 | CakTC37123 | (CT)6   | 14   | 25   | --    | --  |                         |                       |             |     |
| CakTSSR03435 | CakTC37128 | (TTA)5  | 1471 | 1485 | --    | --  | AAACCATGCCTCTTCAATACT   | AAGAATTGGATTGAGGAGAAG | 55.5,55.12  | 154 |
| CakTSSR03436 | CakTC37133 | (TCC)5  | 201  | 215  | --    | --  | ATCCGCTCTCCATTATCTAC    | GATTTCATGAATCTGAATCG  | 55.11,54.79 | 142 |
| CakTSSR03437 | CakTC37140 | (CTT)5  | 143  | 157  | --    | --  | GAGAAAAATGACCTCAACCTT   | TGGAAACTTGTTCAAGACATT | 55.03,54.85 | 151 |

|              |            |         |      |      |            |       |                        |                        |             |     |
|--------------|------------|---------|------|------|------------|-------|------------------------|------------------------|-------------|-----|
| CakTSSR03438 | CakTC37144 | (TGTT)5 | 1185 | 1204 | --         | --    |                        |                        |             |     |
| CakTSSR03439 | CakTC37147 | (GAA)9  | 996  | 1022 | --         | --    | GCTCTACCACCATAATTGAATG | CTCATTACCATAATCCAAAA   | 54.78,55.17 | 150 |
| CakTSSR03440 | CakTC37151 | (AGA)5  | 1600 | 1614 | --         | --    |                        |                        |             |     |
| CakTSSR03441 | CakTC37154 | (TTG)6  | 1189 | 1206 | --         | --    |                        |                        |             |     |
| CakTSSR03442 | CakTC37158 | (TCT)10 | 415  | 444  | --         | --    | CTTCTGAAGATAACGTTGGAC  | TCAACAAGTAGAGGAAGAGGA  | 54.12,54.22 | 152 |
| CakTSSR03443 | CakTC37160 | (CAC)7  | 1084 | 1104 | --         | --    | CAATCTGCTGAAAAATCAATC  | GTATGTTGTTGTCGGAGGAG   | 55.03,55.58 | 147 |
| CakTSSR03444 | CakTC37165 | (TGC)5  | 1066 | 1080 | --         | --    | TGATTAGATTATTCGCCATT   | TGAGATCTCTGCTTTCTCTTG  | 54.55,54.96 | 156 |
| CakTSSR03445 | CakTC37167 | (CAC)6  | 148  | 165  | --         | --    | ACACACACTCTCCACTCTCAC  | TACGACGACTTGTGTTTGT    | 55.07,55.15 | 144 |
| CakTSSR03446 | CakTC37168 | (TTC)9  | 82   | 108  | --         | --    |                        |                        |             |     |
| CakTSSR03447 | CakTC37190 | (AT)7   | 261  | 274  | --         | bZIP  | GGACTAAGGACAATGATACCC  | CCATCAAAGTAAATGATTGG   | 55.11,54.78 | 152 |
| CakTSSR03448 | CakTC37200 | (TA)6   | 1639 | 1650 | --         | --    |                        |                        |             |     |
| CakTSSR03449 | CakTC37204 | (AG)7   | 10   | 23   | --         | --    |                        |                        |             |     |
| CakTSSR03450 | CakTC37208 | (TTC)5  | 1118 | 1132 | --         | --    | TGTTCAATCCCTCTACAACAC  | CCTTTATCTTACGGTGGTCTT  | 55.13,55.12 | 150 |
| CakTSSR03451 | CakTC37211 | (AG)7   | 1165 | 1178 | --         | --    |                        |                        |             |     |
| CakTSSR03452 | CakTC37212 | (GAA)8  | 81   | 104  | --         | --    |                        |                        |             |     |
| CakTSSR03453 | CakTC37214 | (GGC)5  | 7087 | 7101 | --         | PHD   | GAGAATAGAGCGAGTGTCTTG  | AATCCCTAACTCGTTCTCAAC  | 54.41,55.06 | 147 |
| CakTSSR03454 | CakTC37215 | (AAG)5  | 257  | 271  | --         | --    | GAAAACTCTCTCTCTACTGC   | CATATCCTCAAGATCTGCATC  | 54.94,54.8  | 151 |
| CakTSSR03455 | CakTC37224 | (AT)6   | 24   | 35   | --         | --    |                        |                        |             |     |
| CakTSSR03456 | CakTC37227 | (TAT)6  | 242  | 259  | Flower bud | MADS  | GGTTTGTTCCCTTTTACTTGT  | CTCTTCAACTGAACCCTACCT  | 55,55.14    | 143 |
| CakTSSR03457 | CakTC37227 | (AT)6   | 1041 | 1052 | Flower bud | MADS  |                        |                        |             |     |
| CakTSSR03458 | CakTC37228 | (TGG)5  | 840  | 854  | --         | --    | TACTGATTGGTTTCTCGGATT  | GTTCTGACATCTTTCCCTTT   | 56.31,55.03 | 147 |
| CakTSSR03459 | CakTC37236 | (TTC)6  | 439  | 456  | --         | --    | CATCTTTGTTTCTTCATCGT   | TGCAGAAGTAACACTTTTGGT  | 54.54,55.14 | 143 |
| CakTSSR03460 | CakTC37238 | (TC)7   | 23   | 36   | --         | --    |                        |                        |             |     |
| CakTSSR03461 | CakTC37247 | (CAT)7  | 915  | 935  | --         | --    | ATCTACTTTTGCTGTGATGC   | CAGATACAGTTCCATTCCAG   | 54.73,54.82 | 161 |
| CakTSSR03462 | CakTC37250 | (AAT)7  | 221  | 241  | Root       | bHLH  | ACCTTATCAATGATTGCTTCA  | CAAGACAAAGAGGAAATTGTG  | 54.91,55.03 | 154 |
| CakTSSR03463 | CakTC37251 | (AAT)6  | 1791 | 1808 | --         | MYB   | AATCAAGAGATCCACTTCACC  | TGTTTCATGTGCATGATTATTG | 55.71,55.45 | 150 |
| CakTSSR03464 | CakTC37263 | (TTG)6  | 469  | 486  | --         | --    | CTAAGAGCAAGTGATGGAAAA  | GGAACAGTCTCAAGAACAGTG  | 54.88,54.89 | 154 |
| CakTSSR03465 | CakTC37263 | (GTT)6  | 660  | 677  | --         | --    | TTGAGACTGTTCTCTCTTCA   | ACCAACAACAAAACCTAATCA  | 55.14,54.75 | 153 |
| CakTSSR03466 | CakTC37263 | (GA)8   | 974  | 989  | --         | --    | AATCTTGAGGTGATTTCATT   | ATTTCTTTCTCCAATCTCCAC  | 55.23,54.95 | 165 |
| CakTSSR03467 | CakTC37266 | (AG)9   | 1153 | 1170 | --         | bHLH  | GGAAGAATGGCATAAAATAGA  | CTCTCGAGGTAGGTGTGTTTA  | 55.27,54.64 | 155 |
| CakTSSR03468 | CakTC37291 | (AAT)6  | 4    | 21   | --         | --    |                        |                        |             |     |
| CakTSSR03469 | CakTC37295 | (CT)6   | 178  | 189  | --         | zf-HD | TCAACCCTACAACACTTCATC  | TTAGCATCTGCATCTATGGT   | 55.13,55.1  | 133 |
| CakTSSR03470 | CakTC37297 | (CT)7   | 1142 | 1155 | --         | --    |                        |                        |             |     |
| CakTSSR03471 | CakTC37313 | (TTC)9  | 16   | 42   | --         | --    |                        |                        |             |     |
| CakTSSR03472 | CakTC37323 | (AG)6   | 1702 | 1713 | --         | --    |                        |                        |             |     |
| CakTSSR03473 | CakTC37329 | (TGA)5  | 1120 | 1134 | --         | --    | AGGAGATGTGTGGTTAGGATT  | TTGTTTTTCAACGCAAGTCT   | 55.17,55.26 | 151 |
| CakTSSR03474 | CakTC37333 | (GAAT)5 | 1009 | 1028 | --         | --    | GGAATTTAGGTTTCCTCTTCA  | CACATTCATTATCAACACC    | 55.13,55.28 | 156 |

|              |            |           |      |      |           |      |                       |                       |             |     |
|--------------|------------|-----------|------|------|-----------|------|-----------------------|-----------------------|-------------|-----|
| CakTSSR03475 | CakTC37336 | (TG)6     | 952  | 963  | --        | --   | TCATTCTAAACCTGATCTGA  | GCAAGCACTGGTAGAGATATG | 54.86,55.17 | 173 |
| CakTSSR03476 | CakTC37346 | (AAG)6    | 292  | 309  | --        | --   | CACAGAACAAAGAACAACACA | CAGACTGAAAAAGTTCGTGTC | 54.73,55.08 | 153 |
| CakTSSR03477 | CakTC37350 | (GATGGT)5 | 933  | 962  | --        | --   | TAAATGGAGTGAGCAGAAGAA | TACGAGGAAGAATTAGGGTTT | 55.28,54.79 | 161 |
| CakTSSR03478 | CakTC37355 | (TC)9     | 1370 | 1387 | --        | --   |                       |                       |             |     |
| CakTSSR03479 | CakTC37362 | (AGA)5    | 661  | 675  | --        | --   | AGAGGAGACAACGACCTACTT | GTCGAAGATCCTGAGAGAGAT | 54.71,55.07 | 143 |
| CakTSSR03480 | CakTC37363 | (ATC)8    | 526  | 549  | --        | --   | ATCCAGAGGGTAAAAACAAAG | CTTCTGATACGTCTTTTGGA  | 55.09,54.72 | 151 |
| CakTSSR03481 | CakTC37366 | (ATGA)5   | 1154 | 1173 | --        | --   |                       |                       |             |     |
| CakTSSR03482 | CakTC37375 | (GAT)5    | 379  | 393  | --        | --   | GTTTGGTGATATGAGTCCTGA | TAACCTCAGTGACAGCTCCTT | 55.05,54.33 | 161 |
| CakTSSR03483 | CakTC37398 | (CT)6     | 173  | 184  | --        | --   | TTATTACACAACACCCTCACC | GTCATTGATCTGTTGTGTTT  | 55.02,54.95 | 152 |
| CakTSSR03484 | CakTC37398 | (AT)8     | 350  | 365  | --        | --   | AAACACAACCAGATCAATGAC | TAAGAGGAGGAGTTGTCCTT  | 54.95,54.79 | 156 |
| CakTSSR03485 | CakTC37408 | (AAG)13   | 1112 | 1150 | --        | --   |                       |                       |             |     |
| CakTSSR03486 | CakTC37409 | (CT)17    | 4    | 37   | Young_pod | --   |                       |                       |             |     |
| CakTSSR03487 | CakTC37409 | (CT)8     | 142  | 157  | Young_pod | --   | AATCACAGCAACTCAAAGAA  | TGGAAAAATAGAATGCGTATG | 55.18,55.53 | 125 |
| CakTSSR03488 | CakTC37415 | (TA)7     | 1562 | 1575 | --        | --   |                       |                       |             |     |
| CakTSSR03489 | CakTC37420 | (TC)12    | 103  | 126  | --        | --   | GTGGGTATGTAGACTGCAGAA | CACGATGAGAGAATTGAAAC  | 55.34,54.93 | 141 |
| CakTSSR03490 | CakTC37420 | (TTG)5    | 283  | 297  | --        | --   | GTTTTCAATTCTCTCATCGTG | TCCATTCTTCTTCTGTTTCAG | 54.93,54.65 | 156 |
| CakTSSR03491 | CakTC37423 | (ACA)5    | 115  | 129  | --        | --   | CTTCAACCACAATTTTCACAT | GTTGTTGTAGTCGTTGCCAT  | 55.15,55.07 | 156 |
| CakTSSR03492 | CakTC37425 | (AAG)5    | 127  | 141  | --        | --   | TTTGTCATCTCTAACGGTCTT | TTACAAGTTCATGTCATTACC | 54.12,55.16 | 158 |
| CakTSSR03493 | CakTC37427 | (TTC)5    | 41   | 55   | --        | --   |                       |                       |             |     |
| CakTSSR03494 | CakTC37434 | (GAA)5    | 287  | 301  | --        | --   | AACACACAATGGTTTCTATGC | ATTAAGTGATCCCTGAACCAT | 55.17,55.11 | 148 |
| CakTSSR03495 | CakTC37448 | (TCT)6    | 215  | 232  | --        | --   | TACGCAAACTTAGAGCATTTT | CAGACCTTTCACCATTGATT  | 54.7,55.03  | 150 |
| CakTSSR03496 | CakTC37458 | (CTT)5    | 962  | 976  | --        | --   | AAGCAAGTGCTTCTTCTTCTT | CAGTTTCTGATGGGATTGATA | 55.33,55.16 | 150 |
| CakTSSR03497 | CakTC37462 | (AAGA)5   | 1171 | 1190 | --        | --   |                       |                       |             |     |
| CakTSSR03498 | CakTC37466 | (TCGCAA)5 | 19   | 48   | --        | --   |                       |                       |             |     |
| CakTSSR03499 | CakTC37467 | (TTG)6    | 84   | 101  | --        | --   |                       |                       |             |     |
| CakTSSR03500 | CakTC37469 | (GA)8     | 10   | 25   | --        | bZIP |                       |                       |             |     |
| CakTSSR03501 | CakTC37470 | (TC)19    | 971  | 1008 | --        | bZIP | CAGATATGTTCTGCATTGAT  | ACCATTAACAGTCAACCATTG | 55.18,55.02 | 153 |
| CakTSSR03502 | CakTC37472 | (CT)6     | 3731 | 3742 | --        | --   | CTTCTCTGAACAACCATTAC  | TTGAAAACAACAAGAAGC    | 54.83,55.67 | 156 |
| CakTSSR03503 | CakTC37477 | (CT)6     | 37   | 48   | --        | --   |                       |                       |             |     |
| CakTSSR03504 | CakTC37478 | (AG)12    | 100  | 123  | --        | --   |                       |                       |             |     |
| CakTSSR03505 | CakTC37481 | (TTC)6    | 60   | 77   | --        | --   |                       |                       |             |     |
| CakTSSR03506 | CakTC37487 | (TTC)11   | 71   | 103  | --        | --   |                       |                       |             |     |
| CakTSSR03507 | CakTC37488 | (TC)8     | 1    | 16   | --        | --   |                       |                       |             |     |
| CakTSSR03508 | CakTC37490 | (GA)7     | 1179 | 1192 | --        | --   |                       |                       |             |     |
| CakTSSR03509 | CakTC37491 | (TTC)7    | 390  | 410  | --        | --   | ACAACAAACACCCAAAATAGA | AAAATATCTTCCATCGCTTG  | 54.75,56.12 | 138 |
| CakTSSR03510 | CakTC37496 | (CAA)5    | 209  | 223  | --        | bHLH | AGCAAGTGTTCTACACCAAGA | AACAGGGGAAAGATCTTGTA  | 55.12,55.47 | 139 |
| CakTSSR03511 | CakTC37498 | (GAT)9    | 555  | 581  | --        | --   | AGAAGAAGGAGGAGTAGCTGA | AAGTACTCTGTTCCCAAATC  | 55.09,54.9  | 169 |

|              |            |         |      |      |            |            |                        |                        |             |     |
|--------------|------------|---------|------|------|------------|------------|------------------------|------------------------|-------------|-----|
| CakTSSR03512 | CakTC37499 | (AG)14  | 1721 | 1748 | --         | --         |                        |                        |             |     |
| CakTSSR03513 | CakTC37500 | (AT)8   | 1813 | 1828 | --         | --         | TTGAGGAAGCTGGTGGTATATG | AGATGAAATGCCAGGAGTAAT  | 55.11,55.42 | 149 |
| CakTSSR03514 | CakTC37513 | (TC)7   | 1202 | 1215 | --         | Alfin-like |                        |                        |             |     |
| CakTSSR03515 | CakTC37515 | (CT)11  | 26   | 47   | --         | --         |                        |                        |             |     |
| CakTSSR03516 | CakTC37520 | (TAA)6  | 59   | 76   | --         | --         |                        |                        |             |     |
| CakTSSR03517 | CakTC37525 | (TC)6   | 191  | 202  | --         | --         | GAATATCTCAACCGTTTCTCC  | GATAAGTCTATTGGCGTCGTT  | 55.39,56.07 | 144 |
| CakTSSR03518 | CakTC37527 | (GAA)8  | 260  | 283  | --         | --         | AAGAAGAAGAAGAGGATGAGG  | CAAAGTGTTTATCTCTGGTG   | 54.42,54.9  | 149 |
| CakTSSR03519 | CakTC37539 | (AT)9   | 1150 | 1167 | --         | --         |                        |                        |             |     |
| CakTSSR03520 | CakTC37541 | (TAA)5  | 961  | 975  | --         | NAC        | GCITAGACCCTTTATCATGTG  | CAGAACTCCTTCTCCTAAGC   | 54.11,55.11 | 150 |
| CakTSSR03521 | CakTC37545 | (GA)17  | 1609 | 1642 | --         | --         |                        |                        |             |     |
| CakTSSR03522 | CakTC37552 | (TAA)7  | 188  | 208  | --         | --         | ACACTCACAATTATTCCTCCA  | GTTACCACCCTTAGAAGCAAT  | 54.64,55.11 | 152 |
| CakTSSR03523 | CakTC37559 | (AT)6   | 1578 | 1589 | Flower bud | Jumonji    |                        |                        |             |     |
| CakTSSR03524 | CakTC37561 | (GA)9   | 1227 | 1244 | --         | --         |                        |                        |             |     |
| CakTSSR03525 | CakTC37563 | (TAA)5  | 1585 | 1599 | --         | --         |                        |                        |             |     |
| CakTSSR03526 | CakTC37565 | (TTG)7  | 824  | 844  | --         | --         | TTTGTGGGTAGATCTTTGAA   | CAAACAAAACCTCAAACCTCAC | 54.97,54.94 | 150 |
| CakTSSR03527 | CakTC37578 | (GA)8   | 1214 | 1229 | --         | --         |                        |                        |             |     |
| CakTSSR03528 | CakTC37579 | (TCG)5  | 103  | 117  | --         | --         | AGCGATGGGATCTATTCAC    | TACTTTGTGAGTGTGGTGGT   | 55.04,55.59 | 146 |
| CakTSSR03529 | CakTC37590 | (ATA)6  | 179  | 196  | --         | WRKY       | GACAAGTCATGAATGAAGGTG  | GATTCTGAAGTGGAAGGATTC  | 55.56,55.34 | 148 |
| CakTSSR03530 | CakTC37590 | (TCC)6  | 795  | 812  | --         | WRKY       | CCTTAGCTTTGACAATTCCTT  | CAGAGAGGTAATCATTGTTGG  | 55.39,54.82 | 155 |
| CakTSSR03531 | CakTC37598 | (TTG)7  | 927  | 947  | --         | --         | AGACCTTCTTCTCAATGACA   | GTTATCAGTCCAATGGGTTCT  | 54.03,55.58 | 146 |
| CakTSSR03532 | CakTC37598 | (TTG)6  | 1177 | 1194 | --         | --         | TAACCTCTGAGTCTGTTTGG   | ATTACTTGTTGGGTCCTCTTT  | 54.61,54.53 | 149 |
| CakTSSR03533 | CakTC37605 | (TTC)7  | 67   | 87   | --         | --         |                        |                        |             |     |
| CakTSSR03534 | CakTC37616 | (GA)7   | 1245 | 1258 | --         | HSF        |                        |                        |             |     |
| CakTSSR03535 | CakTC37620 | (AG)8   | 1213 | 1228 | --         | --         |                        |                        |             |     |
| CakTSSR03536 | CakTC37621 | (CTT)5  | 72   | 86   | --         | --         |                        |                        |             |     |
| CakTSSR03537 | CakTC37633 | (TGT)7  | 1608 | 1628 | --         | GRAS       | TGATAGTTTTGTTGGAGGAA   | GATGTGGGTCTCAATCTCATA  | 54.97,54.96 | 157 |
| CakTSSR03538 | CakTC37639 | (TAG)5  | 176  | 190  | --         | --         | AAGAGTCCAAAGATGTTGTTG  | TGAGACAATTGATGTTGTTGA  | 54.43,55    | 139 |
| CakTSSR03539 | CakTC37665 | (ACTC)5 | 1612 | 1631 | --         | --         |                        |                        |             |     |
| CakTSSR03540 | CakTC37667 | (AT)15  | 1222 | 1251 | --         | --         | TGGAGAATATTATGTGACCTGA | AGCCTTACTTCAAAAATTGGT  | 54.77,54.86 | 147 |
| CakTSSR03541 | CakTC37672 | (CT)6   | 63   | 74   | --         | --         |                        |                        |             |     |
| CakTSSR03542 | CakTC37674 | (ATA)5  | 9    | 23   | Young_pod  | --         |                        |                        |             |     |
| CakTSSR03543 | CakTC37675 | (CTC)5  | 178  | 192  | --         | --         | AGTGGCCCTAGAAGCTAGTTA  | ATTTAGTTGTTGGTGGTTGG   | 55.19,55.01 | 175 |
| CakTSSR03544 | CakTC37675 | (TCC)6  | 497  | 514  | --         | --         | GACTTCGAGTTCGGCTCTC    | GGTGGTTGTTTTAGGAGAAGT  | 54.85,54.98 | 147 |
| CakTSSR03545 | CakTC37675 | (TTC)5  | 805  | 819  | --         | --         | TCTTCGTCGTTTGATAACACT  | CTGAATCGAGAGAGAGCTAGG  | 55.05,55.11 | 148 |
| CakTSSR03546 | CakTC37680 | (GAG)9  | 1415 | 1441 | --         | --         | TAATTAAGCCTATTTGCGATG  | CAACTTACCCCTTCTAAATC   | 54.01,54.64 | 170 |
| CakTSSR03547 | CakTC37681 | (AAT)7  | 86   | 106  | --         | --         |                        |                        |             |     |
| CakTSSR03548 | CakTC37684 | (TCT)5  | 349  | 363  | --         | --         | CCTTTCTCTTCTCAACATCT   | GAATTAGGGTTAGGGTTCTGA  | 55.18,55.01 | 149 |

|              |            |           |      |      |            |           |                        |                        |             |     |
|--------------|------------|-----------|------|------|------------|-----------|------------------------|------------------------|-------------|-----|
| CakTSSR03549 | CakTC37685 | (AG)11    | 2029 | 2050 | --         | --        |                        |                        |             |     |
| CakTSSR03550 | CakTC37706 | (ACA)7    | 306  | 326  | --         | C2C2-GATA | TTTCAGTGTGTTGTGGAAGACT | TGACTCATTTTGGTTTTGTCT  | 54.92,54.85 | 146 |
| CakTSSR03551 | CakTC37708 | (ATA)5    | 237  | 251  | --         | --        | GATGAGCTCGTCAGTTGTATT  | CAACTGCTTTTCCTTGAATTA  | 54.53,54.9  | 174 |
| CakTSSR03552 | CakTC37721 | (CT)18    | 1    | 36   | --         | --        |                        |                        |             |     |
| CakTSSR03553 | CakTC37726 | (TC)6     | 1029 | 1040 | --         | --        |                        |                        |             |     |
| CakTSSR03554 | CakTC37728 | (TC)6     | 73   | 84   | --         | --        |                        |                        |             |     |
| CakTSSR03555 | CakTC37738 | (TAT)18   | 103  | 156  | --         | --        | AAGTACAACCTGACACCACCAC | TGATTCAACTACTTTCAAGGAA | 54.97,54.31 | 149 |
| CakTSSR03556 | CakTC37742 | (GA)10    | 169  | 188  | Flower bud | --        | TTTTGTTAGCAAGAGGTGAGA  | GCTTCTTATCCTTTCGCAGTA  | 55.36,56.5  | 154 |
| CakTSSR03557 | CakTC37743 | (ATT)5    | 1179 | 1193 | --         | Tify      |                        |                        |             |     |
| CakTSSR03558 | CakTC37747 | (TAT)6    | 863  | 880  | --         | --        | TCAGGAAGATTGGTAGAATCA  | AGATCCTAACCTTCACGAAAA  | 54.86,55.63 | 138 |
| CakTSSR03559 | CakTC37748 | (TC)7     | 111  | 124  | --         | --        | CTTTGCCTCCTCATACAAAT   | TGGTTTCAGGTAAAGGAAAAT  | 56.05,55.48 | 162 |
| CakTSSR03560 | CakTC37765 | (TTC)6    | 42   | 59   | --         | --        |                        |                        |             |     |
| CakTSSR03561 | CakTC37766 | (AGT)5    | 29   | 43   | Flower bud | zf-HD     |                        |                        |             |     |
| CakTSSR03562 | CakTC37771 | (AAC)5    | 266  | 280  | Shoot      | --        | AACATGTTCAATTGCAGCTAA  | AAAGAACCATCAGAAACATCA  | 56.07,54.77 | 144 |
| CakTSSR03563 | CakTC37771 | (ATT)5    | 1561 | 1575 | Shoot      | --        | GGACACAAAATTAACCACAAA  | CTAGAGCACATCATTCTGCTT  | 55.16,54.88 | 163 |
| CakTSSR03564 | CakTC37775 | (TTG)5    | 675  | 689  | --         | --        | TTCTGATTCTGTTCTTGAAA   | ACAGTCAATGGATGAAAACAG  | 55.08,55.13 | 146 |
| CakTSSR03565 | CakTC37776 | (CTT)7    | 60   | 80   | --         | --        |                        |                        |             |     |
| CakTSSR03566 | CakTC37777 | (TC)6     | 102  | 113  | --         | bHLH      | ATTCCATTCTACATTCCACAA  | TGAGAATGATTTTGAAGAGGA  | 54.58,54.99 | 154 |
| CakTSSR03567 | CakTC37778 | (ATC)5    | 975  | 989  | --         | --        | GTATGAAAGCGTTGAAGAAAA  | AAACTCGCCACTGAACTCT    | 54.89,54.98 | 148 |
| CakTSSR03568 | CakTC37779 | (GGT)6    | 677  | 694  | --         | --        | TGATAGCAGCAAGAAGATGAT  | AGAGGTTGTTTCAAGGAGAAC  | 55.22,55.09 | 164 |
| CakTSSR03569 | CakTC37782 | (TGG)5    | 793  | 807  | --         | --        | CACATGTTACAAAGTGAAGCA  | CAATAAGATTCTGTGCAAAC   | 54.88,54.99 | 149 |
| CakTSSR03570 | CakTC37782 | (GTG)5    | 925  | 939  | --         | --        | GTTTGCACAGGAATCTTATTG  | AGATAGCTAGTTCCTATCGTC  | 54.99,55.17 | 145 |
| CakTSSR03571 | CakTC37793 | (GTT)5    | 266  | 280  | --         | --        | TGGTACTTTTCATATCCGAGAA | CAAACTCTCATCAAAATCTGG  | 54.92,54.86 | 155 |
| CakTSSR03572 | CakTC37810 | (AGA)5    | 1071 | 1085 | --         | --        | GGCTTAAGATGGTTGTACCT   | TAACCCCTCAACTTCTCTCTC  | 55.11,55.18 | 144 |
| CakTSSR03573 | CakTC37812 | (TGT)5    | 1624 | 1638 | --         | --        | GTCGTGGAAAGTCTAGGTTCT  | AACACCGTGAATGATAGTGAG  | 55.13,55.17 | 150 |
| CakTSSR03574 | CakTC37821 | (TC)8     | 23   | 38   | --         | --        |                        |                        |             |     |
| CakTSSR03575 | CakTC37830 | (GTG)5    | 515  | 529  | --         | HB        | TCTTTTCAGATGGATCTGTGT  | ACCACCACAGTTATCATCATC  | 54.74,54.72 | 153 |
| CakTSSR03576 | CakTC37831 | (TTC)6    | 296  | 313  | --         | --        | GCGTTTAATCATTTCTCTCAA  | CATGTCAATGAACTTGAGGTCT | 54.81,55.11 | 150 |
| CakTSSR03577 | CakTC37832 | (CTCCTT)7 | 1091 | 1132 | Root       | --        | GCAAAATGAACCTATTCACAAA | GTGTTTCAGTGTTGTGGAGAT  | 56.31,55.02 | 149 |
| CakTSSR03578 | CakTC37834 | (TCC)5    | 182  | 196  | --         | --        | AAAGTCACACAGAAGCTTTCC  | AAGTTAATCGAGGGGATAATG  | 56.18,54.98 | 146 |
| CakTSSR03579 | CakTC37844 | (AAT)7    | 69   | 89   | --         | --        |                        |                        |             |     |
| CakTSSR03580 | CakTC37847 | (TCT)5    | 845  | 859  | --         | --        | TTTGATGAATATCCACATGGT  | GATGAAGATATGGCTGAGATG  | 55.28,54.8  | 154 |
| CakTSSR03581 | CakTC37849 | (CAG)6    | 553  | 570  | --         | --        | CTATATGCAACATCCTCAAGC  | TATTAGGTCTAAGCCCCATT   | 55.1,54.77  | 167 |
| CakTSSR03582 | CakTC37859 | (TC)6     | 675  | 686  | --         | --        | AAATTCCGGTGATAAACGTCA  | CAGATGGACAAAAACAGAGAG  | 54.89,55.01 | 147 |
| CakTSSR03583 | CakTC37861 | (GAA)5    | 475  | 489  | --         | --        | CCCCGAGCTAGTATCATTATT  | ACCAACTCCGAAAGAAATTA   | 55.17,55.63 | 148 |
| CakTSSR03584 | CakTC37868 | (GCA)5    | 738  | 752  | --         | --        | CCTATTTTACTGGTGATGGA   | TTCTTCCATTGAAACTCTCAG  | 54.38,54.65 | 150 |
| CakTSSR03585 | CakTC37872 | (TGA)5    | 809  | 823  | --         | --        | AATGTGGAAATTGGAGAAAGT  | TTGGAAGTTCTTATTGGTTG   | 55.31,54.59 | 143 |

|              |            |         |      |      |    |           |                        |                        |             |     |
|--------------|------------|---------|------|------|----|-----------|------------------------|------------------------|-------------|-----|
| CakTSSR03586 | CakTC37885 | (CT)6   | 81   | 92   | -- | --        |                        |                        |             |     |
| CakTSSR03587 | CakTC37887 | (GAT)7  | 259  | 279  | -- | --        | ACTTCAATAATGCAAGAACCA  | ATCTAAAGCATCTTCCCAAGT  | 54.99,54.76 | 152 |
| CakTSSR03588 | CakTC37889 | (GA)10  | 1668 | 1687 | -- | --        |                        |                        |             |     |
| CakTSSR03589 | CakTC37894 | (TA)8   | 57   | 72   | -- | --        |                        |                        |             |     |
| CakTSSR03590 | CakTC37894 | (CCT)6  | 910  | 927  | -- | --        | GTTGGTGGAGAAGAGGATTAG  | ATTGCATAAAAGGAGAAGACC  | 55.47,55.15 | 155 |
| CakTSSR03591 | CakTC37895 | (AG)6   | 1177 | 1188 | -- | bHLH      |                        |                        |             |     |
| CakTSSR03592 | CakTC37896 | (AAG)6  | 899  | 916  | -- | --        | ACGAAAAGTTGGTTAGGAAAA  | CTTCCTCCATCAATGACTTTA  | 55.7,54.47  | 152 |
| CakTSSR03593 | CakTC37899 | (CT)7   | 90   | 103  | -- | --        |                        |                        |             |     |
| CakTSSR03594 | CakTC37915 | (TCT)5  | 362  | 376  | -- | --        | AGTAGCAACTCTCCATCATCA  | TGATGGTGACTCTATTGGTC   | 54.95,55.05 | 153 |
| CakTSSR03595 | CakTC37925 | (TC)7   | 952  | 965  | -- | --        |                        |                        |             |     |
| CakTSSR03596 | CakTC37929 | (AGC)5  | 412  | 426  | -- | C2C2-GATA | AGTGCGGATACAAAGATGATA  | CAGAACAAACCTAACAGTTG   | 54.94,54.99 | 139 |
| CakTSSR03597 | CakTC37938 | (ATG)6  | 654  | 671  | -- | HMG       | CATGAAGGCCTATAACAAGAA  | GAGCTTCTACTCGTCATCATC  | 54.7,54.13  | 145 |
| CakTSSR03598 | CakTC37941 | (TTC)6  | 430  | 447  | -- | --        | CCAACCTCAAGAAAAGAAAACA | TACTTGATGGTTGTGTACGTG  | 54.77,54.57 | 148 |
| CakTSSR03599 | CakTC37942 | (AT)9   | 48   | 65   | -- | FAR1      |                        |                        |             |     |
| CakTSSR03600 | CakTC37946 | (ACC)5  | 1084 | 1098 | -- | --        | AGGAGGCATAAGACCATAAAC  | TGGTGGTGCTAAATTTAAAGA  | 55.03,55.18 | 136 |
| CakTSSR03601 | CakTC37964 | (CAA)5  | 186  | 200  | -- | --        | CACACACTTTTCAATTAAGCA  | TGAAGTACTGGTCTTCCATTG  | 54.12,55.31 | 153 |
| CakTSSR03602 | CakTC37970 | (AC)8   | 1    | 16   | -- | --        |                        |                        |             |     |
| CakTSSR03603 | CakTC37970 | (GGA)9  | 944  | 970  | -- | --        | CACAAGAACTCCAAGAATTG   | ACAAAAGCTTAGCATCATCAG  | 55.03,54.9  | 144 |
| CakTSSR03604 | CakTC37979 | (CAC)5  | 79   | 93   | -- | --        |                        |                        |             |     |
| CakTSSR03605 | CakTC37980 | (TTA)5  | 956  | 970  | -- | --        | TGGTTTTCTCTCTTTTTCCT   | CCAGGCATTGTTTACAATTAG  | 54.94,55.05 | 134 |
| CakTSSR03606 | CakTC37983 | (AG)6   | 170  | 181  | -- | SRS       | TCTACAGACACAAAAGGGGTA  | CACTTATCTGTGCGACTCTTT  | 54.9,54.8   | 150 |
| CakTSSR03607 | CakTC37983 | (TAG)5  | 573  | 587  | -- | SRS       | GGGTAAATTTGATTGGTTGT   | TCCTTCGTTATTGTTGTTGTT  | 55.59,54.91 | 150 |
| CakTSSR03608 | CakTC37983 | (ACA)5  | 1044 | 1058 | -- | SRS       | AAGAAGGATTGTCTCATGTT   | TTATGATGAGTGTGTTGGTGA  | 55.3,54.86  | 146 |
| CakTSSR03609 | CakTC37988 | (CT)11  | 13   | 34   | -- | --        |                        |                        |             |     |
| CakTSSR03610 | CakTC37994 | (GAA)6  | 267  | 284  | -- | --        | CCTCTCTTCTCTCTCCACAT   | CCTCTTCTGCTTCTTTTCTT   | 55.17,54.85 | 200 |
| CakTSSR03611 | CakTC37995 | (ACA)5  | 1583 | 1597 | -- | --        | ACAACAAGGACACTTTTGAGA  | AATGATTATTGTTGGTGTGGA  | 54.92,55.36 | 150 |
| CakTSSR03612 | CakTC38001 | (AG)6   | 489  | 500  | -- | --        |                        |                        |             |     |
| CakTSSR03613 | CakTC38007 | (AG)10  | 1191 | 1210 | -- | --        |                        |                        |             |     |
| CakTSSR03614 | CakTC38018 | (TATT)5 | 155  | 174  | -- | --        | CTTCAGCACTAATGACTTTGG  | CACTTCTCGTTTTTGATTTTG  | 55.23,55.21 | 151 |
| CakTSSR03615 | CakTC38022 | (AT)19  | 1087 | 1124 | -- | --        | TCTCCACGGATCTCATTATTA  | TGACCCTAATTGCAAAGATAA  | 54.84,55.1  | 140 |
| CakTSSR03616 | CakTC38031 | (TTC)6  | 1704 | 1721 | -- | --        |                        |                        |             |     |
| CakTSSR03617 | CakTC38041 | (TG)6   | 1700 | 1711 | -- | --        |                        |                        |             |     |
| CakTSSR03618 | CakTC38044 | (GA)6   | 1    | 12   | -- | --        |                        |                        |             |     |
| CakTSSR03619 | CakTC38044 | (AG)7   | 1610 | 1623 | -- | --        | CGAACCTTCCATATTTAACAA  | CAAGGTTTCTAACCTGAACA   | 54.57,54.64 | 155 |
| CakTSSR03620 | CakTC38071 | (AT)6   | 22   | 33   | -- | --        |                        |                        |             |     |
| CakTSSR03621 | CakTC38074 | (AAG)5  | 80   | 94   | -- | --        |                        |                        |             |     |
| CakTSSR03622 | CakTC38076 | (AAT)6  | 130  | 147  | -- | HB        | TATGTTATGGCTTTTGGAGAA  | GGAAGAGAGAGTTTGTATTTGC | 55.1,54.97  | 169 |

|              |            |         |      |      |            |            |                        |                          |             |     |
|--------------|------------|---------|------|------|------------|------------|------------------------|--------------------------|-------------|-----|
| CakTSSR03623 | CakTC38080 | (AG)8   | 1689 | 1704 | --         | --         |                        |                          |             |     |
| CakTSSR03624 | CakTC38081 | (TC)8   | 1105 | 1120 | --         | Alfin-like |                        |                          |             |     |
| CakTSSR03625 | CakTC38096 | (AT)16  | 2228 | 2259 | --         | AP2-EREBP  | TTGTCACCATTATCTCCACTC  | CCAATATCTATTTCATCTTCACCT | 55.05,54.23 | 143 |
| CakTSSR03626 | CakTC38102 | (GAAT)5 | 1079 | 1098 | --         | --         |                        |                          |             |     |
| CakTSSR03627 | CakTC38115 | (AGG)5  | 1186 | 1200 | --         | --         | TGAGTGTGAAACAGACAGTG   | ATCTTCCATGCCTCTAAAAAT    | 54.69,54.7  | 145 |
| CakTSSR03628 | CakTC38119 | (TTG)7  | 923  | 943  | --         | --         | AGAAGGTGAAGAGGAAGAAGA  | CTCAATACCGTTATGGAAACA    | 54.89,55.29 | 150 |
| CakTSSR03629 | CakTC38119 | (GA)12  | 1053 | 1076 | --         | --         |                        |                          |             |     |
| CakTSSR03630 | CakTC38121 | (TC)7   | 23   | 36   | --         | --         |                        |                          |             |     |
| CakTSSR03631 | CakTC38129 | (TC)8   | 1    | 16   | --         | --         |                        |                          |             |     |
| CakTSSR03632 | CakTC38134 | (CAC)5  | 1397 | 1411 | --         | --         | TGGAGCAGCATATGATTTATT  | TAGAAGCTGATCTTGCTGAAG    | 55.04,55.18 | 140 |
| CakTSSR03633 | CakTC38135 | (TA)9   | 995  | 1012 | --         | --         |                        |                          |             |     |
| CakTSSR03634 | CakTC38136 | (TC)14  | 110  | 137  | --         | C3H        | TTACATCACATGTTTCGTTTCA | TAATTGGGAGTTGATTGAATG    | 55.06,55.17 | 153 |
| CakTSSR03635 | CakTC38136 | (ATG)5  | 479  | 493  | --         | C3H        | TTTTGAAGTTAGGGATGAACA  | CATCAACCTTCTCACTCACAT    | 54.97,55.11 | 149 |
| CakTSSR03636 | CakTC38136 | (AT)6   | 1740 | 1751 | --         | C3H        |                        |                          |             |     |
| CakTSSR03637 | CakTC38143 | (TTC)12 | 1028 | 1063 | --         | --         |                        |                          |             |     |
| CakTSSR03638 | CakTC38179 | (ACA)5  | 277  | 291  | --         | --         | GAACAACGTGTTCTCTCCAT   | CAAAGAGATCTGAGAGTTGGA    | 55.09,54.62 | 175 |
| CakTSSR03639 | CakTC38187 | (GA)14  | 1760 | 1787 | --         | --         |                        |                          |             |     |
| CakTSSR03640 | CakTC38205 | (TTC)7  | 1465 | 1485 | --         | --         | TGGTGAAGAAGACAAGTCTTA  | CATTTGGAATAAAGCTACTGC    | 55.01,54.62 | 152 |
| CakTSSR03641 | CakTC38241 | (TTG)5  | 569  | 583  | --         | C3H        | CAGCAATTGTTGTTATTGTGA  | CTGAAGCTTGTAAGATGGAA     | 54.81,54.88 | 154 |
| CakTSSR03642 | CakTC38244 | (CTA)6  | 91   | 108  | --         | C2H2       |                        |                          |             |     |
| CakTSSR03643 | CakTC38247 | (CT)6   | 12   | 23   | --         | HB         |                        |                          |             |     |
| CakTSSR03644 | CakTC38250 | (TAA)9  | 529  | 555  | --         | Trihelix   | TTCCAACACAACATGTTACAA  | TTAGGAGCTAGTGGTTGATGA    | 54.97,55.15 | 154 |
| CakTSSR03645 | CakTC38252 | (AG)10  | 1536 | 1555 | --         | --         |                        |                          |             |     |
| CakTSSR03646 | CakTC38262 | (CAA)5  | 97   | 111  | --         | --         |                        |                          |             |     |
| CakTSSR03647 | CakTC38275 | (AGA)8  | 1016 | 1039 | Flower bud | --         |                        |                          |             |     |
| CakTSSR03648 | CakTC38277 | (CAT)5  | 268  | 282  | --         | --         | TTTACCCATGACCATCACTAC  | TTCGTGGTAATGATTTGATTTC   | 54.93,55.16 | 176 |
| CakTSSR03649 | CakTC38288 | (TTC)6  | 217  | 234  | --         | --         | TCTAACAAGATTTTGGAATC   | AGTGTTCCTGCAGATAGGA      | 54.65,55.04 | 150 |
| CakTSSR03650 | CakTC38300 | (CT)18  | 11   | 46   | --         | --         |                        |                          |             |     |
| CakTSSR03651 | CakTC38303 | (TCT)5  | 137  | 151  | --         | --         | ACAAAAGCACGATAGAAGTCA  | CTTCAATGTCGTTTGAGAAG     | 55.22,55.19 | 134 |
| CakTSSR03652 | CakTC38307 | (ATT)5  | 1623 | 1637 | --         | --         | TGAGTTCAGGATAAAGTTGA   | TCCAAAAGAACAACAACAAGT    | 54.95,54.94 | 178 |
| CakTSSR03653 | CakTC38307 | (CGG)5  | 1796 | 1810 | --         | --         |                        |                          |             |     |
| CakTSSR03654 | CakTC38311 | (TTG)11 | 1105 | 1137 | --         | --         | AAAGGGTAGAGAAAAGGGTTT  | CCTATTTCTCCATTCCCTAAC    | 55.31,54.56 | 134 |
| CakTSSR03655 | CakTC38324 | (CA)6   | 2341 | 2352 | --         | --         |                        |                          |             |     |
| CakTSSR03656 | CakTC38326 | (GT)6   | 1594 | 1605 | --         | --         | ATTAGAAAGCAACATGTCCAA  | AAAGTTACTCAGTCCGACAAG    | 54.99,54.88 | 151 |
| CakTSSR03657 | CakTC38339 | (CCA)6  | 928  | 945  | --         | --         | AAAAGGACAAGGATTATGGAG  | TAAGGCCTCACATTTGAATA     | 55.01,55.1  | 152 |
| CakTSSR03658 | CakTC38340 | (AG)7   | 64   | 77   | --         | TPR        |                        |                          |             |     |
| CakTSSR03659 | CakTC38341 | (ATC)5  | 3781 | 3795 | --         | --         | TAAGGATGCTTCGAGTAACTG  | CTCCCAATTATCCCTCTCTTA    | 54.91,55.1  | 161 |

|              |            |        |      |      |           |            |                       |                       |             |     |
|--------------|------------|--------|------|------|-----------|------------|-----------------------|-----------------------|-------------|-----|
| CakTSSR03660 | CakTC38347 | (TGT)5 | 1174 | 1188 | --        | --         | GCGAGTTTTTAGGTGTGATA  | CAAAATCGACACCTTTATTTA | 54.77,54.88 | 152 |
| CakTSSR03661 | CakTC38352 | (ACA)6 | 258  | 275  | --        | --         | CATCAACATCTTCACTCCAC  | ATCTTGATCACCAAAGGTTTT | 55.56,55.31 | 149 |
| CakTSSR03662 | CakTC38353 | (CT)15 | 18   | 47   | --        | --         |                       |                       |             |     |
| CakTSSR03663 | CakTC38383 | (AGT)5 | 991  | 1005 | --        | --         | GGTGATGATTGAGCTAAAGTG | AATAACACCAACACCAATTCA | 54.97,55.44 | 152 |
| CakTSSR03664 | CakTC38388 | (ATG)7 | 205  | 225  | --        | --         | AAGAACACACCACCTCAATAA | CATAGTCCATCGAGGTTTCAT | 54.72,54.98 | 151 |
| CakTSSR03665 | CakTC38393 | (GA)9  | 1828 | 1845 | Young_pod | --         |                       |                       |             |     |
| CakTSSR03666 | CakTC38412 | (GGC)5 | 1409 | 1423 | --        | --         | AGGAATGTAGTGATGAGGTGA | GGACCAACAGAATCAACAAC  | 54.6,55.36  | 157 |
| CakTSSR03667 | CakTC38412 | (GA)15 | 1686 | 1715 | --        | --         |                       |                       |             |     |
| CakTSSR03668 | CakTC38413 | (CCA)5 | 325  | 339  | --        | --         | CCATTTATATCACTTCCACCA | AATCGATGCTTTTGAGTCTTT | 55.05,55.77 | 156 |
| CakTSSR03669 | CakTC38439 | (TC)11 | 67   | 88   | --        | --         |                       |                       |             |     |
| CakTSSR03670 | CakTC38442 | (AAC)5 | 150  | 164  | --        | --         | CAAAATCTCTCAACACCAAAC | AAATGAGAAGGCAAGAGATTC | 54.85,55.26 | 149 |
| CakTSSR03671 | CakTC38442 | (ATC)5 | 543  | 557  | --        | --         | TCTCTCTACCACCAAATCAAA | TTCTGTATGATGAGCAAGGAT | 54.95,54.88 | 134 |
| CakTSSR03672 | CakTC38449 | (TC)6  | 1685 | 1696 | --        | --         |                       |                       |             |     |
| CakTSSR03673 | CakTC38450 | (TTC)7 | 1138 | 1158 | --        | --         |                       |                       |             |     |
| CakTSSR03674 | CakTC38454 | (TTA)5 | 1089 | 1103 | --        | bHLH       | AAGGAGGGGTTTTCTCTTTAT | AATCCTATTCTCCCTTCTCT  | 55.24,55.15 | 135 |
| CakTSSR03675 | CakTC38460 | (CCA)5 | 784  | 798  | --        | --         | GCTGATCATTGAATTGGTTAC | AACAATATTACCCAGGAGAG  | 54.73,54.89 | 156 |
| CakTSSR03676 | CakTC38469 | (CA)6  | 1311 | 1322 | --        | --         |                       |                       |             |     |
| CakTSSR03677 | CakTC38497 | (TC)9  | 37   | 54   | --        | --         |                       |                       |             |     |
| CakTSSR03678 | CakTC38520 | (CT)7  | 1637 | 1650 | --        | --         |                       |                       |             |     |
| CakTSSR03679 | CakTC38524 | (TTC)6 | 83   | 100  | --        | --         |                       |                       |             |     |
| CakTSSR03680 | CakTC38533 | (AG)7  | 1185 | 1198 | --        | --         |                       |                       |             |     |
| CakTSSR03681 | CakTC38535 | (CT)9  | 1091 | 1108 | --        | --         |                       |                       |             |     |
| CakTSSR03682 | CakTC38536 | (ACA)6 | 1297 | 1314 | --        | LUG        | TCTCCTCAGAGTCAAATCA   | TAGCTAATCCCCTTAATCGTT | 55.06,54.92 | 143 |
| CakTSSR03683 | CakTC38539 | (TGT)6 | 1340 | 1357 | --        | --         | ATTGTTCTTGCTGATGATGTC | GTTTTCTCTTTCTGGGTCAT  | 55.2,55.03  | 173 |
| CakTSSR03684 | CakTC38539 | (TC)7  | 1631 | 1644 | --        | --         |                       |                       |             |     |
| CakTSSR03685 | CakTC38545 | (ACA)5 | 197  | 211  | --        | --         | CTACCTTGAGAACGAAGAACA | CCGAGAGATTAAACTTCCATT | 54.77,55.16 | 151 |
| CakTSSR03686 | CakTC38552 | (ATA)5 | 1598 | 1612 | --        | --         | TATGGTTTCTTAATGGCAGAA | GGTCTATTTCCATCTTCTCA  | 55.1,55.14  | 152 |
| CakTSSR03687 | CakTC38554 | (AGC)5 | 1108 | 1122 | --        | Alfin-like |                       |                       |             |     |
| CakTSSR03688 | CakTC38560 | (ACG)5 | 159  | 173  | --        | TRAF       | CGAAAGATAACCAACAATC   | GAAAGACACCTCATGGTGATA | 54.83,55.05 | 136 |
| CakTSSR03689 | CakTC38563 | (ACA)6 | 68   | 85   | --        | --         |                       |                       |             |     |
| CakTSSR03690 | CakTC38573 | (TC)15 | 49   | 78   | --        | --         |                       |                       |             |     |
| CakTSSR03691 | CakTC38582 | (CTT)5 | 35   | 49   | --        | --         |                       |                       |             |     |
| CakTSSR03692 | CakTC38590 | (TCT)6 | 198  | 215  | --        | --         | CTTCAATTCTCTTCCAATTCC | AAGAGAGGTTAAGGTCAGCAT | 55.52,54.81 | 148 |
| CakTSSR03693 | CakTC38602 | (TC)6  | 1199 | 1210 | --        | --         |                       |                       |             |     |
| CakTSSR03694 | CakTC38604 | (TGA)5 | 348  | 362  | --        | --         | ACCAGTTGTTAGCAGGTCTTA | CTTCATGATTCTGCACCTTAC | 54.25,54.97 | 152 |
| CakTSSR03695 | CakTC38604 | (GAT)6 | 1339 | 1356 | --        | --         | GCCTTAGTGGAACCTTTAT   | CAATGATTGAATTATGATGCC | 55.05,54.54 | 149 |
| CakTSSR03696 | CakTC38609 | (CCT)6 | 296  | 313  | --        | --         | GCACCCTATTCAATTATTAC  | CCGCTAGTCCTAAGAAGAGTT | 53.89,54.76 | 141 |

|              |            |         |      |      |    |     |                         |                       |             |     |
|--------------|------------|---------|------|------|----|-----|-------------------------|-----------------------|-------------|-----|
| CakTSSR03697 | CakTC38616 | (ATA)5  | 30   | 44   | -- | --  |                         |                       |             |     |
| CakTSSR03698 | CakTC38620 | (TC)12  | 2797 | 2820 | -- | --  |                         |                       |             |     |
| CakTSSR03699 | CakTC38632 | (AAAC)5 | 219  | 238  | -- | --  | TTGAACAACACAAAAATACCC   | GATGCTGAGAAAGCTAAGGTC | 55.16,55.93 | 150 |
| CakTSSR03700 | CakTC38637 | (TC)18  | 1    | 36   | -- | --  |                         |                       |             |     |
| CakTSSR03701 | CakTC38647 | (GAT)5  | 473  | 487  | -- | --  | GGTGATGAAGAAGGAGGTACT   | GCTCTCATCATCCTTATCCTT | 54.88,55.06 | 153 |
| CakTSSR03702 | CakTC38648 | (AG)6   | 969  | 980  | -- | ULT | TGCTTCAAAGAGAAGATGTTG   | GCTATACGCCAGCTAATTACA | 55.77,55.08 | 150 |
| CakTSSR03703 | CakTC38652 | (AAT)5  | 16   | 30   | -- | --  |                         |                       |             |     |
| CakTSSR03704 | CakTC38656 | (ATT)10 | 100  | 129  | -- | --  |                         |                       |             |     |
| CakTSSR03705 | CakTC38658 | (TC)7   | 1023 | 1036 | -- | --  | TTGAGGAATATATGGTCGAAA   | ACATACATGCAACAATCTCAA | 54.86,54.1  | 152 |
| CakTSSR03706 | CakTC38666 | (TTA)5  | 383  | 397  | -- | --  | CTCTGCCATTGTTATGTTTTTC  | ATTTGGTGGAGAAAGTTCCTA | 54.99,55.47 | 158 |
| CakTSSR03707 | CakTC38670 | (ATG)5  | 689  | 703  | -- | --  | TAAACGTGTCGATTTGATTTC   | GTGACTTTGATGGCTGATTTA | 55.4,55.39  | 143 |
| CakTSSR03708 | CakTC38671 | (AG)6   | 1725 | 1736 | -- | --  |                         |                       |             |     |
| CakTSSR03709 | CakTC38673 | (CT)9   | 1    | 18   | -- | --  |                         |                       |             |     |
| CakTSSR03710 | CakTC38679 | (TCT)5  | 242  | 256  | -- | --  | ATCCCAATTCCCACTTCTAT    | TCAGGTTCAACACAGATGAAT | 55.01,55.56 | 150 |
| CakTSSR03711 | CakTC38690 | (TA)9   | 163  | 180  | -- | --  | GCATAAACCTGACAAAAGAAAA  | GCTCTTCCAATACAGAATCAA | 54.73,54.62 | 136 |
| CakTSSR03712 | CakTC38690 | (AAG)5  | 1438 | 1452 | -- | --  | ATTAGTCCATTAGACCCCTTCG  | ACATGTAAACGAGGAACCTTT | 55.04,55.42 | 146 |
| CakTSSR03713 | CakTC38694 | (CT)8   | 1391 | 1406 | -- | --  |                         |                       |             |     |
| CakTSSR03714 | CakTC38696 | (TTC)8  | 148  | 171  | -- | --  | TGATTAGAGGAGAGATGAGCA   | ATCTTTGGATTTTGAGGAGAG | 55.18,55.12 | 146 |
| CakTSSR03715 | CakTC38698 | (AGA)5  | 1400 | 1414 | -- | --  |                         |                       |             |     |
| CakTSSR03716 | CakTC38701 | (AGA)5  | 1236 | 1250 | -- | --  | GGAAGGTCAACAAACCTAAT    | AGTGTTTTTCTCAACACATGG | 54.92,55.22 | 148 |
| CakTSSR03717 | CakTC38704 | (CAA)6  | 1150 | 1167 | -- | --  | AACCATTGTCTTCCTTCTTC    | CCCATCTAATTGGACTCTTTT | 55.03,55.01 | 149 |
| CakTSSR03718 | CakTC38707 | (GAA)7  | 601  | 621  | -- | --  | GACAAAGAATGCAGAAGAAGA   | TACTCCTGAAGGACATCTTGA | 54.8,54.92  | 147 |
| CakTSSR03719 | CakTC38715 | (GAA)5  | 863  | 877  | -- | --  | GGTGGAGATCTTGTATCCATT   | CAAGAAAGCTCAGTGAACAAC | 55.51,55.25 | 167 |
| CakTSSR03720 | CakTC38720 | (TG)6   | 1179 | 1190 | -- | --  | CCCAATTTTAGTCCCAAATAC   | CAGCAATTTAATCAGAAAGGA | 55.29,54.82 | 157 |
| CakTSSR03721 | CakTC38734 | (GA)15  | 1476 | 1505 | -- | --  |                         |                       |             |     |
| CakTSSR03722 | CakTC38739 | (TTA)12 | 1712 | 1747 | -- | --  | GAATCTGATTTTCGGAATATTTG | AGTGTGATTTCAACATCTGCT | 55.5,54.85  | 158 |
| CakTSSR03723 | CakTC38740 | (GAA)5  | 1486 | 1500 | -- | --  |                         |                       |             |     |
| CakTSSR03724 | CakTC38744 | (CAA)7  | 375  | 395  | -- | --  | CACCACAAGTTTGTCTTCAT    | ACAAGCAAGTGAAGTAAACCA | 55.22,55.14 | 157 |
| CakTSSR03725 | CakTC38749 | (AC)8   | 169  | 184  | -- | --  | TGCTCCATCTATAACTCCTCA   | ATGAAAGTCAACACTGCATCT | 55.06,54.85 | 137 |
| CakTSSR03726 | CakTC38753 | (AG)11  | 391  | 412  | -- | HB  | TGAGAAAAATTAGCACACAAAG  | ACATAATCATGCTGTTGTGCC | 54.99,55.09 | 143 |
| CakTSSR03727 | CakTC38756 | (GAA)5  | 500  | 514  | -- | --  | AAGACTGTGATTTGGCATTAG   | ACCAGAAGCAGAAAAAGAAAC | 54.58,55.42 | 176 |
| CakTSSR03728 | CakTC38763 | (TGA)5  | 971  | 985  | -- | --  | GTGGTCCAACATAGAACCATA   | TCTTCTTGTTTGTGTGCGTT  | 54.93,55.1  | 155 |
| CakTSSR03729 | CakTC38763 | (GTG)6  | 1150 | 1167 | -- | --  | GTGATGATTTTGTGATGGTTT   | AAAGATTGCAGTGTGTTGTTT | 54.88,54.61 | 140 |
| CakTSSR03730 | CakTC38771 | (TC)6   | 6    | 17   | -- | --  |                         |                       |             |     |
| CakTSSR03731 | CakTC38780 | (TGA)5  | 1314 | 1328 | -- | C3H | AAATTTATCATCCCAAGGACT   | AAAGAACCATTCCAAGAGAC  | 54.39,55.03 | 152 |
| CakTSSR03732 | CakTC38786 | (AAT)6  | 30   | 47   | -- | --  |                         |                       |             |     |
| CakTSSR03733 | CakTC38786 | (TTC)6  | 1405 | 1422 | -- | --  | CAAGTTTGTATGATGGTGGAT   | AAAAAGGAATGTGAAGCTAT  | 54.93,54.78 | 147 |

|              |            |          |      |      |    |           |                       |                       |             |     |
|--------------|------------|----------|------|------|----|-----------|-----------------------|-----------------------|-------------|-----|
| CakTSSR03734 | CakTC38789 | (GAA)5   | 82   | 96   | -- | --        |                       |                       |             |     |
| CakTSSR03735 | CakTC38796 | (ATCGC)5 | 1282 | 1306 | -- | --        | AAAAATATCCAAAGGGTATCG | GAAATGAAAAGAGATGGTCAA | 55,54.42    | 152 |
| CakTSSR03736 | CakTC38799 | (TC)8    | 355  | 370  | -- | --        | TTCACGAAAATACATCACACA | GGAGGACTATTAGCCATTGAA | 55.06,55.98 | 172 |
| CakTSSR03737 | CakTC38803 | (ATC)5   | 738  | 752  | -- | MYB       | GCAAGTCATGCACAAAAGTAT | TATGTTGGCCTGTTATTGGTA | 55.49,55.72 | 148 |
| CakTSSR03738 | CakTC38805 | (AG)8    | 3    | 18   | -- | --        |                       |                       |             |     |
| CakTSSR03739 | CakTC38806 | (AAC)6   | 1370 | 1387 | -- | --        | GTTCAGATTGAGGTGAAACAG | AATAAAGGCTGCAATAACACA | 54.83,55.2  | 149 |
| CakTSSR03740 | CakTC38817 | (TGT)5   | 1136 | 1150 | -- | bHLH      | AGATTCTTCATTGTTGGCATA | TGGATTCAACAAGTATTGGAC | 54.91,55.06 | 140 |
| CakTSSR03741 | CakTC38830 | (AAT)6   | 829  | 846  | -- | MYB       | CCTTCTATGGTTTCATCATCA | GTTGGTGGAACATTCTCATT  | 55.16,55.06 | 155 |
| CakTSSR03742 | CakTC38832 | (CT)10   | 6    | 25   | -- | --        |                       |                       |             |     |
| CakTSSR03743 | CakTC38833 | (TCT)5   | 353  | 367  | -- | bHLH      | TAGCAGCTGATAGTTGCTCTT | GCTACAATTGGCATATGAAAG | 54.81,55.12 | 151 |
| CakTSSR03744 | CakTC38834 | (AG)16   | 2980 | 3011 | -- | --        | AGCTGAGTAAAATTCATCGTG | CAAGTGTTCTCATTCTTTTCG | 54.74,55.19 | 158 |
| CakTSSR03745 | CakTC38850 | (TAT)6   | 99   | 116  | -- | --        |                       |                       |             |     |
| CakTSSR03746 | CakTC38857 | (CT)6    | 53   | 64   | -- | --        |                       |                       |             |     |
| CakTSSR03747 | CakTC38866 | (TTA)6   | 1249 | 1266 | -- | G2-like   | GCTTAAGCTTTGTTGTTGTTG | CATCATCACTTCCAAACATT  | 55.46,55.06 | 150 |
| CakTSSR03748 | CakTC38866 | (ATG)5   | 1394 | 1408 | -- | G2-like   | TGGAAGAAGTGTGTTGAAAT  | CAAGAAGTGAAGATGAAATGG | 54.85,54.95 | 153 |
| CakTSSR03749 | CakTC38870 | (ATG)5   | 362  | 376  | -- | --        | CAACAACAAGGAACTGTGAT  | TTGGTATCCTTAACAACAACC | 55.22,54.29 | 138 |
| CakTSSR03750 | CakTC38872 | (ACC)6   | 321  | 338  | -- | --        | AAATTCTTCAACAACCTCCTC | GCCAATGATTTAGGTTAGGAT | 55.03,54.97 | 157 |
| CakTSSR03751 | CakTC38879 | (AG)6    | 3    | 14   | -- | --        |                       |                       |             |     |
| CakTSSR03752 | CakTC38880 | (AAGA)5  | 1214 | 1233 | -- | AP2-EREBP | TTCTTCATTGAATGGGTCTAA | GAATTTTGATTGAAACAGGT  | 54.89,55.71 | 140 |
| CakTSSR03753 | CakTC38896 | (TAT)5   | 1248 | 1262 | -- | --        |                       |                       |             |     |
| CakTSSR03754 | CakTC38901 | (TA)7    | 1418 | 1431 | -- | --        | GGGGAATGTTTCTGTTTTTAT | CAGTGATGAGACCACCAGATA | 54.87,56.06 | 152 |
| CakTSSR03755 | CakTC38904 | (AAT)6   | 271  | 288  | -- | --        | CTTCAAGAGTTATTGCTCCAA | GCTTGATTAGCCACAAGATTA | 54.88,54.84 | 148 |
| CakTSSR03756 | CakTC38907 | (TA)10   | 1265 | 1284 | -- | --        |                       |                       |             |     |
| CakTSSR03757 | CakTC38915 | (TC)9    | 1289 | 1306 | -- | --        |                       |                       |             |     |
| CakTSSR03758 | CakTC38916 | (TC)10   | 102  | 121  | -- | --        | GTCGACTTCTGTGTCCTGAG  | TGACAACTCCATTTTAACACC | 55.1,55.15  | 151 |
| CakTSSR03759 | CakTC38916 | (AG)8    | 1502 | 1517 | -- | --        |                       |                       |             |     |
| CakTSSR03760 | CakTC38917 | (AAG)5   | 1292 | 1306 | -- | --        | ACGAGAATTGTTTAAGGGAGT | CATTATCATCAGCAGCTTTCT | 54.68,54.82 | 170 |
| CakTSSR03761 | CakTC38925 | (TC)9    | 31   | 48   | -- | --        |                       |                       |             |     |
| CakTSSR03762 | CakTC38925 | (AAT)6   | 162  | 179  | -- | --        | CAACAACAGTCTCACAGTCAC | CCATTGATGAGTGGGTATTTA | 54.01,55.05 | 149 |
| CakTSSR03763 | CakTC38934 | (CGC)5   | 654  | 668  | -- | G2-like   | CCATGTTTTGTTGTAGGTGAT | GTGTTATTGTTGGACCTCAAG | 55.02,54.72 | 150 |
| CakTSSR03764 | CakTC38934 | (TC)7    | 1322 | 1335 | -- | G2-like   |                       |                       |             |     |
| CakTSSR03765 | CakTC38936 | (AT)8    | 1464 | 1479 | -- | --        | CACAGTTCAAAGGTTCAAAAG | AGATGGCACAATTGAACTAA  | 55.11,54.99 | 148 |
| CakTSSR03766 | CakTC38937 | (AAG)5   | 1424 | 1438 | -- | --        | GGGTTTCCAGTAACAACAATA | ATTAGTACCAATCCCACCTTC | 54.29,54.72 | 147 |
| CakTSSR03767 | CakTC38944 | (TC)7    | 56   | 69   | -- | --        |                       |                       |             |     |
| CakTSSR03768 | CakTC38945 | (TA)6    | 52   | 63   | -- | --        |                       |                       |             |     |
| CakTSSR03769 | CakTC38960 | (GA)7    | 1176 | 1189 | -- | --        |                       |                       |             |     |
| CakTSSR03770 | CakTC38966 | (GCC)5   | 699  | 713  | -- | --        | GTGGTGATGAGGACTACGAT  | CATAAAGCTGAAGCTGAACAT | 54.86,54.9  | 150 |

|              |            |         |      |      |            |               |                        |                        |             |     |
|--------------|------------|---------|------|------|------------|---------------|------------------------|------------------------|-------------|-----|
| CakTSSR03771 | CakTC38979 | (TGG)6  | 473  | 490  | --         | --            | AAGGATTGGCTTTGTIACCT   | GTGTTTCCATAAGATCCATCA  | 54.86,54.98 | 169 |
| CakTSSR03772 | CakTC38983 | (CT)6   | 593  | 604  | --         | --            | TCTGTGCAACCCCTAGCTATT  | TAAATGTAAGCGGAATTGAG   | 55.16,54.88 | 148 |
| CakTSSR03773 | CakTC38984 | (CAC)5  | 420  | 434  | --         | Tify          | CCAGCAAGTTATTTCTCTCAA  | CACGAAAACCAAGTATCTTCAG | 54.88,55.07 | 164 |
| CakTSSR03774 | CakTC38987 | (ACA)5  | 249  | 263  | --         | bHLH          | TCAACCAACTTTGTCTATGAAG | GTTGGTGTGGTTGTAACATT   | 54.65,54.93 | 143 |
| CakTSSR03775 | CakTC38994 | (AAC)5  | 142  | 156  | --         | --            | AAACACTCTTTGCCTCTTCTT  | TGACATCCTTAACAACATTGG  | 55.02,56.03 | 149 |
| CakTSSR03776 | CakTC38997 | (TC)10  | 1435 | 1454 | --         | WI/SNF-BAF60b |                        |                        |             |     |
| CakTSSR03777 | CakTC38998 | (GA)11  | 1189 | 1210 | --         | --            | TTGTAAGTATGGAAGGGGTTT  | ATTGACAGCTTTTATCCATCA  | 55.36,54.91 | 149 |
| CakTSSR03778 | CakTC39003 | (TAT)8  | 133  | 156  | --         | --            | CAAGGAAATATCACAAAGGTG  | TACAAAGGATCATGAGTTTCA  | 54.84,53.28 | 188 |
| CakTSSR03779 | CakTC39003 | (TCA)8  | 562  | 585  | --         | --            | TGAATCCATGTTCAAGAGTTT  | AGACCAATTAGAAGAGCCAAT  | 54.77,54.76 | 158 |
| CakTSSR03780 | CakTC39005 | (GGT)7  | 887  | 907  | --         | --            | TGGGTTTGATGAGAAGAGTAG  | TAAAACTGAATCACCAACCATC | 54.52,55.06 | 151 |
| CakTSSR03781 | CakTC39011 | (TGA)5  | 274  | 288  | --         | --            | AACAAGAGTTCAAGCACTCAA  | CTCGTCTCTTCAAGATTCA    | 55.25,54.79 | 146 |
| CakTSSR03782 | CakTC39020 | (TTC)7  | 949  | 969  | --         | --            | CTTTGTTACGATTCTTCGTC   | GTAAGGAAAAATAAGGCAAGG  | 54.32,54.96 | 149 |
| CakTSSR03783 | CakTC39026 | (GAA)7  | 1114 | 1134 | --         | --            | GTTATTGTCCTTGGTTTCTGG  | CTACTCCATTTCTGCTTCTT   | 54,55.38    | 151 |
| CakTSSR03784 | CakTC39028 | (CACT)5 | 1405 | 1424 | --         | --            |                        |                        |             |     |
| CakTSSR03785 | CakTC39031 | (TC)8   | 169  | 184  | --         | --            | CTCTCAAATCCCTCACTTTTT  | CTGACACCTAAAATGGATCAG  | 55.2,54.82  | 150 |
| CakTSSR03786 | CakTC39038 | (TTC)20 | 35   | 94   | --         | --            |                        |                        |             |     |
| CakTSSR03787 | CakTC39040 | (TC)8   | 22   | 37   | --         | --            |                        |                        |             |     |
| CakTSSR03788 | CakTC39042 | (GT)7   | 1341 | 1354 | --         | --            |                        |                        |             |     |
| CakTSSR03789 | CakTC39044 | (CT)12  | 1446 | 1469 | --         | --            |                        |                        |             |     |
| CakTSSR03790 | CakTC39055 | (TA)6   | 1334 | 1345 | --         | --            | AGCTAGTTTGTGTGAGCTTGA  | GTGTTCGAACTTCCATTTACA  | 54.7,55.31  | 144 |
| CakTSSR03791 | CakTC39069 | (TAA)13 | 438  | 476  | --         | --            | CCATCAAAGACTTCTCCTTTAG | CCGTGAGAAAGATATTGACTG  | 54.99,54.98 | 157 |
| CakTSSR03792 | CakTC39082 | (AAT)6  | 15   | 32   | --         | bHLH          |                        |                        |             |     |
| CakTSSR03793 | CakTC39104 | (AG)6   | 23   | 34   | --         | --            |                        |                        |             |     |
| CakTSSR03794 | CakTC39106 | (TAA)5  | 1499 | 1513 | Flower bud | --            |                        |                        |             |     |
| CakTSSR03795 | CakTC39108 | (AAC)5  | 181  | 195  | --         | --            | TCGTAATAATCAATGGAATCG  | AAATATCTTTCCAGGACTAGCA | 55.3,54.95  | 153 |
| CakTSSR03796 | CakTC39108 | (TGG)5  | 854  | 868  | --         | --            | GTATGGAGATGCTTATGAAGG  | CATATCCAGCAAATTCAC TTC | 54.02,54.91 | 134 |
| CakTSSR03797 | CakTC39115 | (TCT)6  | 257  | 274  | --         | --            | TAATTCCAACAACAATGTTCC  | TTAATGATTTTCTCCCTCTC   | 55.08,55.05 | 147 |
| CakTSSR03798 | CakTC39122 | (TTA)7  | 488  | 508  | --         | --            | AAAGAAGATGGATCTGGAATC  | ATGAAAGACTTCCACTTGATG  | 54.86,54.34 | 166 |
| CakTSSR03799 | CakTC39122 | (TCT)6  | 1028 | 1045 | --         | --            | ACCTTCTCTGGTTCATCTTC   | GTAGCAATTCTGGCTAATCCT  | 55.01,55.34 | 159 |
| CakTSSR03800 | CakTC39123 | (CAA)5  | 90   | 104  | --         | --            |                        |                        |             |     |
| CakTSSR03801 | CakTC39128 | (TAA)7  | 705  | 725  | --         | --            | AGGCCACAATAATTACAACAA  | CATTCAAGTCGAAGTCAAAAG  | 54.89,55.19 | 146 |
| CakTSSR03802 | CakTC39146 | (GTA)5  | 1243 | 1257 | --         | --            | GTGAGTGATTGGAATCTGAA   | CAAGGTAGCCAAACTTAGAAA  | 55.18,54.14 | 145 |
| CakTSSR03803 | CakTC39148 | (AGA)8  | 1476 | 1499 | --         | --            |                        |                        |             |     |
| CakTSSR03804 | CakTC39156 | (TTTA)5 | 1579 | 1598 | --         | --            |                        |                        |             |     |
| CakTSSR03805 | CakTC39158 | (AATT)6 | 325  | 348  | --         | SBP           | GCTCCTCCATTAACTCATTC   | CAACTTCAAGCTCAATGTTTT  | 55.54,54.79 | 168 |
| CakTSSR03806 | CakTC39158 | (TC)9   | 1574 | 1591 | --         | SBP           |                        |                        |             |     |
| CakTSSR03807 | CakTC39161 | (ACC)6  | 1399 | 1416 | --         | --            | TTGAATACAACCAACCCATT   | CTTTCAACTCAATTCATGC    | 54.67,55.12 | 152 |

|              |            |         |      |      |            |         |                         |                       |             |     |
|--------------|------------|---------|------|------|------------|---------|-------------------------|-----------------------|-------------|-----|
| CakTSSR03808 | CakTC39178 | (ACC)5  | 241  | 255  | --         | --      | AAGGTTGCAACAAACAGTTA    | TATGAGAATGATTTGGATGG  | 55.15,55.09 | 142 |
| CakTSSR03809 | CakTC39179 | (TCTT)5 | 82   | 101  | --         | --      |                         |                       |             |     |
| CakTSSR03810 | CakTC39183 | (ACT)5  | 1371 | 1385 | --         | --      | AGGTGAAGTTTCCATCTTTTC   | TCATTGTTCTACCAAAGAGA  | 55.03,54.95 | 149 |
| CakTSSR03811 | CakTC39190 | (GAA)5  | 1099 | 1113 | --         | --      | CAATTGTCCATGAACATCAC    | AGTCTTCGATTGCTAATTCT  | 54.55,55.07 | 148 |
| CakTSSR03812 | CakTC39194 | (AGA)8  | 331  | 354  | --         | --      | CATCTTTGATTTTCTTGATGC   | CCATCATCTTCATCATTCATC | 55.03,55.31 | 153 |
| CakTSSR03813 | CakTC39200 | (AG)10  | 1532 | 1551 | --         | --      |                         |                       |             |     |
| CakTSSR03814 | CakTC39201 | (TA)6   | 2534 | 2545 | Young_pod  | --      | TTGTTGAATGCCAGTAAAGAC   | ATGAACTTCCTTTTGGTGAAT | 55.47,55.31 | 154 |
| CakTSSR03815 | CakTC39206 | (CT)7   | 115  | 128  | --         | AUX/IAA | GCCCTTGAGTTGAGTTAAGAC   | AAACTATGGAAATGGAAGGTT | 55.69,54.48 | 147 |
| CakTSSR03816 | CakTC39212 | (CTT)6  | 1358 | 1375 | --         | --      | CTCCTTTATCCATCATTCCTT   | TCATCCCTATTTGTGTTCTCA | 54.93,54.89 | 142 |
| CakTSSR03817 | CakTC39222 | (TTTA)5 | 1393 | 1412 | --         | --      | TGTTGCTGATTTACTCTGATG   | CAGACCACTTGTTGTTGATCT | 53.98,55.2  | 152 |
| CakTSSR03818 | CakTC39223 | (TCT)6  | 60   | 77   | --         | C2H2    |                         |                       |             |     |
| CakTSSR03819 | CakTC39223 | (CAA)5  | 1250 | 1264 | --         | C2H2    | TTGGGTCAACAAATATGAGTC   | TTGTCTTGAACCCTTAACAA  | 55.06,55.05 | 149 |
| CakTSSR03820 | CakTC39223 | (ATA)6  | 1535 | 1552 | --         | C2H2    | AACCATGCACTAAACAAATC    | TTCACCACCTTCAGTTGTTAT | 54.43,54.72 | 150 |
| CakTSSR03821 | CakTC39225 | (TC)11  | 149  | 170  | --         | --      | CCGTCCTCTACCCCTATTCTA   | CCATTCGAATGAATGTAATC  | 55.21,54.69 | 148 |
| CakTSSR03822 | CakTC39230 | (TC)26  | 1    | 52   | --         | --      |                         |                       |             |     |
| CakTSSR03823 | CakTC39235 | (AAG)5  | 100  | 114  | --         | --      |                         |                       |             |     |
| CakTSSR03824 | CakTC39237 | (TCT)12 | 174  | 209  | --         | --      | ACAGAGCGTTCAAAGTTTAT    | AATTGGAGAAGAAGAGTTGCT | 53.54,54.94 | 154 |
| CakTSSR03825 | CakTC39245 | (TGA)5  | 107  | 121  | --         | --      | ATACGCAAAATGCAATAGAGAG  | CTGATGATGTAGCAACCAAGT | 54.87,55.34 | 145 |
| CakTSSR03826 | CakTC39247 | (AG)12  | 1566 | 1589 | --         | --      | AGCTGAATTGAATCTTCCTCT   | ATCATTCTCACTTCCCTTCAT | 54.86,55.22 | 141 |
| CakTSSR03827 | CakTC39255 | (ACT)6  | 5839 | 5856 | --         | ARID    | CTAGGTTTACCCCTTCCCATATA | TTGACTCTTCTTCTCAAACG  | 55.07,54.9  | 161 |
| CakTSSR03828 | CakTC39256 | (ATT)5  | 1531 | 1545 | --         | --      | CTAACTGGTGGTGAAGAATTG   | CATAGTTGCAAAACAAAATCC | 54.9,55.01  | 156 |
| CakTSSR03829 | CakTC39262 | (AG)20  | 1520 | 1559 | --         | --      |                         |                       |             |     |
| CakTSSR03830 | CakTC39264 | (TTC)7  | 1433 | 1453 | --         | --      |                         |                       |             |     |
| CakTSSR03831 | CakTC39266 | (CAG)5  | 1035 | 1049 | --         | --      | ATCTTCCCAGTTGCTTTCTAA   | AGCTCATGAATAGTGGACTCA | 55.78,54.95 | 150 |
| CakTSSR03832 | CakTC39280 | (CAA)5  | 87   | 101  | --         | --      |                         |                       |             |     |
| CakTSSR03833 | CakTC39286 | (AAG)5  | 1379 | 1393 | --         | --      | CGCCCTTTAATCTTCTCTTTTA  | AAACGACACTTGAATATTGTC | 53.56,54.59 | 152 |
| CakTSSR03834 | CakTC39287 | (TGA)5  | 171  | 185  | --         | --      | TTCTTTTGAACAAAGTATGC    | AGAGGGGTTTTTGTGTGTAT  | 54.73,55.26 | 159 |
| CakTSSR03835 | CakTC39302 | (AG)6   | 1531 | 1542 | Root       | --      |                         |                       |             |     |
| CakTSSR03836 | CakTC39303 | (CAA)5  | 88   | 102  | Flower bud | --      |                         |                       |             |     |
| CakTSSR03837 | CakTC39307 | (ATG)5  | 1215 | 1229 | --         | HB      | GAAATGATGATGAGTTGGAAA   | TTCTTCTTTATCCATGGCTTT | 55.11,55.7  | 145 |
| CakTSSR03838 | CakTC39307 | (GA)11  | 1480 | 1501 | --         | HB      |                         |                       |             |     |
| CakTSSR03839 | CakTC39312 | (GGT)5  | 428  | 442  | --         | --      | GATTCAAGGAACATTGCATAAG  | CCATCAACAATCTGTATGGAG | 54.91,55.53 | 166 |
| CakTSSR03840 | CakTC39318 | (GA)12  | 1563 | 1586 | --         | --      |                         |                       |             |     |
| CakTSSR03841 | CakTC39325 | (CAA)5  | 1007 | 1021 | --         | G2-like | CAAGAGATCATTCAAAATGGA   | TTTCACTTCATCACTACACCA | 55.29,54.12 | 153 |
| CakTSSR03842 | CakTC39336 | (GTT)5  | 110  | 124  | --         | --      | AGAGAGAGAACCAACCAAAGT   | TCAATCACTTGAAGTTGTCCT | 54.67,54.83 | 148 |
| CakTSSR03843 | CakTC39345 | (GTG)6  | 293  | 310  | --         | --      | TCFTTGGATCCACATTCATAC   | TGGCATCAAGGTTACTAATTC | 54.98,54.52 | 152 |
| CakTSSR03844 | CakTC39353 | (GA)8   | 1489 | 1504 | --         | --      |                         |                       |             |     |

|              |            |           |      |      |            |      |                       |                       |             |     |
|--------------|------------|-----------|------|------|------------|------|-----------------------|-----------------------|-------------|-----|
| CakTSSR03845 | CakTC39365 | (AG)8     | 22   | 37   | --         | --   |                       |                       |             |     |
| CakTSSR03846 | CakTC39372 | (TC)8     | 100  | 115  | Flower bud | --   |                       |                       |             |     |
| CakTSSR03847 | CakTC39382 | (CT)7     | 1    | 14   | --         | --   |                       |                       |             |     |
| CakTSSR03848 | CakTC39387 | (GT)8     | 1420 | 1435 | --         | --   |                       |                       |             |     |
| CakTSSR03849 | CakTC39388 | (TC)6     | 1211 | 1222 | --         | --   | TACGAAGTCGTTATGAGGGTA | CAACTCAAACACAAATCAACA | 55.04,54.67 | 157 |
| CakTSSR03850 | CakTC39393 | (GAA)9    | 1346 | 1372 | --         | --   | AGAGAAGCCATTTGAGAGAAT | TTTTCTCCCTTCTTATTACC  | 54.86,55.13 | 148 |
| CakTSSR03851 | CakTC39408 | (CT)7     | 343  | 356  | --         | --   | CATCCTCATCATATTCAGCAG | GGAAGAGGAGAGTGTGGTTAC | 55.78,55.37 | 150 |
| CakTSSR03852 | CakTC39410 | (GAG)5    | 1429 | 1443 | --         | GeBP | TTCTACTTCGTCTTCTGGTTG | TCAAACCTAACACCAATTCT  | 54.77,56.23 | 149 |
| CakTSSR03853 | CakTC39411 | (AG)7     | 15   | 28   | --         | --   |                       |                       |             |     |
| CakTSSR03854 | CakTC39421 | (GA)8     | 1365 | 1380 | --         | --   | GTTGGGATACCTCATAGGACT | TGCCAGAAACAGTGAGATATT | 54.69,54.97 | 138 |
| CakTSSR03855 | CakTC39424 | (TC)7     | 80   | 93   | --         | --   |                       |                       |             |     |
| CakTSSR03856 | CakTC39430 | (CTT)5    | 1409 | 1423 | --         | --   |                       |                       |             |     |
| CakTSSR03857 | CakTC39438 | (AC)6     | 130  | 141  | --         | --   | ATAGAGACAAAATCGGAAAGC | GAAAATGGATGATGTGAGAGA | 55.31,55.09 | 142 |
| CakTSSR03858 | CakTC39439 | (CTTCTC)5 | 786  | 815  | --         | --   | TATGATCAGTGGGTTCTTCAA | GATGATGCTGAGAAGAAGAAA | 55.66,54.72 | 151 |
| CakTSSR03859 | CakTC39439 | (TTC)5    | 1000 | 1014 | --         | --   | CACATCCTCTCCTTTTCCTT  | AAGAATGGGTTTGATAGGAAG | 54.33,55.01 | 151 |
| CakTSSR03860 | CakTC39446 | (TTG)5    | 1644 | 1658 | --         | --   |                       |                       |             |     |
| CakTSSR03861 | CakTC39457 | (TCT)6    | 45   | 62   | --         | --   |                       |                       |             |     |
| CakTSSR03862 | CakTC39468 | (ATA)6    | 93   | 110  | --         | --   |                       |                       |             |     |
| CakTSSR03863 | CakTC39470 | (GAA)5    | 940  | 954  | --         | --   | TTACTTCCGTGTGATAGTGCT | TACCGATCCTGTTTTTAATTG | 55.09,54.57 | 151 |
| CakTSSR03864 | CakTC39476 | (AG)6     | 1219 | 1230 | --         | --   | ACCCAGAGGTGAAGATAAGAT | AGTTGGGTGTGTGCTGTTAC  | 54.41,54.97 | 144 |
| CakTSSR03865 | CakTC39479 | (GAT)7    | 1277 | 1297 | --         | --   | AAGGAGAGAAACCCTAAGTTG | GTTTCCCTTTTCATTATTCT  | 54.42,54.97 | 149 |
| CakTSSR03866 | CakTC39487 | (TC)14    | 1    | 28   | --         | --   |                       |                       |             |     |
| CakTSSR03867 | CakTC39488 | (CT)16    | 77   | 108  | --         | --   |                       |                       |             |     |
| CakTSSR03868 | CakTC39489 | (TTC)6    | 1230 | 1247 | --         | --   |                       |                       |             |     |
| CakTSSR03869 | CakTC39490 | (GT)6     | 4    | 15   | --         | --   |                       |                       |             |     |
| CakTSSR03870 | CakTC39496 | (TTA)5    | 410  | 424  | --         | --   | CACATACAACAACCCCTTTT  | GCAATGACGATAAGAGAATGA | 55.1,55.47  | 148 |
| CakTSSR03871 | CakTC39503 | (ATC)5    | 47   | 61   | --         | --   |                       |                       |             |     |
| CakTSSR03872 | CakTC39503 | (TCA)5    | 238  | 252  | --         | --   | GCTAATTGGAGAAAACAACAA | CCAATTGTAGCACAAAACCTC | 54.73,55.07 | 152 |
| CakTSSR03873 | CakTC39514 | (AG)11    | 84   | 105  | --         | --   |                       |                       |             |     |
| CakTSSR03874 | CakTC39517 | (GAG)5    | 1076 | 1090 | --         | FHA  | CGGATTGAACTTTCTTCAAC  | AAGAGAGAAGCAAAGACCTTC | 54.92,54.65 | 134 |
| CakTSSR03875 | CakTC39527 | (TTA)6    | 161  | 178  | --         | --   | TTTTCTGTTTTGGGTTTGTG  | CAATTATGGGCATTTACAAT  | 55.26,54.44 | 166 |
| CakTSSR03876 | CakTC39534 | (TAT)8    | 188  | 211  | --         | --   | AAACCTTGTGACATGTTTCTC | TTGTGGTATGGAAGTCAAATC | 54.24,55.06 | 149 |
| CakTSSR03877 | CakTC39539 | (CAA)7    | 210  | 230  | --         | --   | TGTGGTTCCTCTAAACGTATC | AGGGAGTGAAGGTTTATCTTG | 54.41,55.07 | 171 |
| CakTSSR03878 | CakTC39563 | (AAT)6    | 1360 | 1377 | --         | --   |                       |                       |             |     |
| CakTSSR03879 | CakTC39571 | (AG)8     | 1333 | 1348 | --         | --   |                       |                       |             |     |
| CakTSSR03880 | CakTC39602 | (CT)6     | 1113 | 1124 | --         | --   | TACTTTTGGTCAGATGGAAAA | ATACCAGGGTGATGGTATGAT | 54.97,55.67 | 153 |
| CakTSSR03881 | CakTC39607 | (AGA)8    | 75   | 98   | --         | --   |                       |                       |             |     |

|              |            |           |      |      |             |            |                        |                        |             |     |
|--------------|------------|-----------|------|------|-------------|------------|------------------------|------------------------|-------------|-----|
| CakTSSR03882 | CakTC39608 | (ACC)6    | 92   | 109  | --          | --         |                        |                        |             |     |
| CakTSSR03883 | CakTC39613 | (GAA)5    | 46   | 60   | --          | --         |                        |                        |             |     |
| CakTSSR03884 | CakTC39615 | (ACA)5    | 24   | 38   | --          | --         |                        |                        |             |     |
| CakTSSR03885 | CakTC39626 | (GA)11    | 1227 | 1248 | --          | --         | CAATGAATAGGATCTTGGAGA  | CCTGAGCAAACATCATTAGTC  | 54.38,54.97 | 154 |
| CakTSSR03886 | CakTC39638 | (GAT)5    | 328  | 342  | --          | --         | AAAGAGTTGTCCGATAGACCT  | TTTTATCCTCCTTTTCCTTG   | 54.65,55.3  | 149 |
| CakTSSR03887 | CakTC39645 | (TGT)5    | 1091 | 1105 | --          | --         | AAGAGGGTCAGTGAGTGATCT  | CTTTACAAACAACATCAGCAA  | 55.36,54.12 | 153 |
| CakTSSR03888 | CakTC39653 | (TTA)5    | 1001 | 1015 | --          | --         | TGTTTCTTCAATGTTCTGCTT  | GTCTCTCAAACAAACCAAAAA  | 55.18,54.59 | 151 |
| CakTSSR03889 | CakTC39653 | (TTC)5    | 1311 | 1325 | --          | --         |                        |                        |             |     |
| CakTSSR03890 | CakTC39655 | (TTC)7    | 1795 | 1815 | --          | --         | GATTGGGGAATATTCTGATT   | ACAACACTCACACTCCACT    | 54.71,55.49 | 151 |
| CakTSSR03891 | CakTC39656 | (TTC)17   | 45   | 95   | --          | --         |                        |                        |             |     |
| CakTSSR03892 | CakTC39659 | (AGA)5    | 80   | 94   | --          | --         |                        |                        |             |     |
| CakTSSR03893 | CakTC39660 | (CCA)7    | 241  | 261  | --          | --         | GTGCAGAAAAGAACATAGCAT  | ATGAAGAAGAGAGAGCTTCGT  | 54.73,55.08 | 159 |
| CakTSSR03894 | CakTC39675 | (TTC)5    | 3288 | 3302 | --          | --         | TCCTTCTTCTCCTTCTTCTC   | CTCTACTCCAACATGTCACC   | 54.55,54.69 | 151 |
| CakTSSR03895 | CakTC39700 | (TAT)5    | 81   | 95   | --          | --         |                        |                        |             |     |
| CakTSSR03896 | CakTC39700 | (CTT)5    | 251  | 265  | --          | --         | GTTGAATTTTCAGATCTCGTG  | AAAAACGAGAAGAATGAGGAT  | 54.93,54.72 | 153 |
| CakTSSR03897 | CakTC39704 | (AAAATC)5 | 168  | 197  | --          | --         | CCTCTAAGTCAATTTGGGTCT  | TGAGAGTCGTCAGAGAGAGAG  | 55.07,54.83 | 155 |
| CakTSSR03898 | CakTC39706 | (AG)8     | 193  | 208  | --          | --         | ACTCCCATACAACACAGTACG  | CAGAGTTTAATCTCAGCGAAA  | 55.12,55.04 | 156 |
| CakTSSR03899 | CakTC39710 | (ATA)10   | 1334 | 1363 | --          | --         |                        |                        |             |     |
| CakTSSR03900 | CakTC39719 | (TGTAAG)5 | 1137 | 1166 | --          | --         | TGAGATTGAGATTGAGATTGC  | ATTGAGGGAATATGATGAGGT  | 55.43,55.02 | 171 |
| CakTSSR03901 | CakTC39723 | (AG)6     | 75   | 86   | --          | --         |                        |                        |             |     |
| CakTSSR03902 | CakTC39725 | (CT)6     | 157  | 168  | --          | --         | GCAAGTAAATGAAATGAAACTC | CATCTTCAACAAGAAATCCAG  | 55.02,54.95 | 141 |
| CakTSSR03903 | CakTC39734 | (CAC)5    | 754  | 768  | --          | --         | ATAAGGAAAAAGGAAGCTTTG  | AGGCAGGAACACTTTTGAAG   | 54.7,55.46  | 151 |
| CakTSSR03904 | CakTC39738 | (AG)9     | 1254 | 1271 | --          | --         |                        |                        |             |     |
| CakTSSR03905 | CakTC39741 | (CT)8     | 101  | 116  | --          | SBP        | TATTCTTTCTACAGGCAACGA  | ATTGAGGTTATCCACCAAGAT  | 55.32,55.11 | 144 |
| CakTSSR03906 | CakTC39748 | (TCT)5    | 2623 | 2637 | --          | zf-HD      |                        |                        |             |     |
| CakTSSR03907 | CakTC39752 | (CTT)15   | 123  | 167  | --          | --         | AATTCACCAATGGAAGTTTCT  | CCTAACAGCCTTATCGATCTC  | 55.31,55.74 | 150 |
| CakTSSR03908 | CakTC39754 | (TGC)5    | 789  | 803  | --          | C2C2-Dof   | CTTCTCATTTGTCAGCTATGG  | TTAGCAAACCTGTTGAATTA   | 55.15,55.18 | 157 |
| CakTSSR03909 | CakTC39758 | (GAA)6    | 17   | 34   | --          | --         |                        |                        |             |     |
| CakTSSR03910 | CakTC39760 | (TGTT)5   | 215  | 234  | Mature Leaf | --         | AGACACTTAACTCTGCAGCAA  | CGAAGAAAGGTAAAAGGAAGA  | 55.45,55.52 | 150 |
| CakTSSR03911 | CakTC39768 | (GGA)7    | 180  | 200  | --          | --         | ATTCTTCTATTGCTTGGTCT   | TCTCTTATCTCCTCCTCTC    | 54.76,54.33 | 164 |
| CakTSSR03912 | CakTC39768 | (CCA)8    | 453  | 476  | --          | --         | GACGATATTGCTCATCACATT  | GAAGGATGAAGAAAAGAATCC  | 55.17,54.6  | 149 |
| CakTSSR03913 | CakTC39775 | (CCA)5    | 1171 | 1185 | --          | --         | CGGTACGACTATAGATTCTCG  | CACATCTTCCCTGTTTCATATC | 54.16,54.55 | 153 |
| CakTSSR03914 | CakTC39776 | (GA)6     | 1430 | 1441 | --          | --         | CTATATCAGCCAACCTCAATCG | CTTTTCTTTCTCCCTCATCTC  | 55.12,54.83 | 162 |
| CakTSSR03915 | CakTC39780 | (TTC)5    | 38   | 52   | --          | --         |                        |                        |             |     |
| CakTSSR03916 | CakTC39783 | (CAT)8    | 889  | 912  | --          | --         | CCTTTTCTACTTGACACAG    | GATGATCACGTCAAAAATGAT  | 54.22,54.97 | 145 |
| CakTSSR03917 | CakTC39784 | (GAA)5    | 1452 | 1466 | --          | --         | GAGGGATAGATGGAGAGAAGA  | AGACTCAGATCTTTCGAATCC  | 55.02,55.09 | 138 |
| CakTSSR03918 | CakTC39785 | (AG)6     | 1262 | 1273 | --          | Alfin-like |                        |                        |             |     |

|              |            |           |      |      |            |          |                        |                       |             |     |
|--------------|------------|-----------|------|------|------------|----------|------------------------|-----------------------|-------------|-----|
| CakTSSR03919 | CakTC39788 | (ATA)5    | 111  | 125  | --         | --       | CACCTCAAGAATGGGAATTTT  | ATAGTTCTTACGCGCACATAG | 55.87,54.99 | 136 |
| CakTSSR03920 | CakTC39791 | (AG)11    | 123  | 144  | --         | --       | CGGTCTCTGCAAAAGTATAAG  | GAAGTTGAGGATTCCATTCT  | 54.53,54.95 | 144 |
| CakTSSR03921 | CakTC39795 | (TTTCAT)6 | 106  | 141  | --         | --       | CCTTTTCATTTCACCTAAAT   | TCGAAAGAAAGAAAGGCTAAT | 55.03,55.21 | 145 |
| CakTSSR03922 | CakTC39796 | (AATCC)5  | 271  | 295  | Young_pod  | --       | CAGATTACATTGTTTGGATGC  | TTCTTCCCAAGTAGTAACTCG | 55.68,53.93 | 151 |
| CakTSSR03923 | CakTC39799 | (GAA)19   | 1300 | 1356 | --         | bZIP     | AACTTGTCGAAGAAAGACTCC  | ATTCAATCACTCATCACCATC | 55.25,54.77 | 158 |
| CakTSSR03924 | CakTC39802 | (CTT)5    | 460  | 474  | --         | --       | CTGACTCCGAACCTGACTC    | CTTCACCTTCTCGCTTCTAT  | 55.71,55.54 | 159 |
| CakTSSR03925 | CakTC39809 | (CCA)7    | 275  | 295  | --         | --       | CTTCATCTCTCTCACAAGC    | CAGAGTCTGGAATCCTCTTG  | 54.33,54.89 | 158 |
| CakTSSR03926 | CakTC39811 | (TC)6     | 232  | 243  | --         | --       | ATCATCACATTCTCAACAAC   | ATATTCCCACACACATGAAAG | 54.86,54.93 | 138 |
| CakTSSR03927 | CakTC39846 | (CTT)6    | 130  | 147  | --         | --       | TCITGATAGTTGAAGCAAAGC  | TTTCTACTTCTCCCAAATTC  | 55.02,55.13 | 153 |
| CakTSSR03928 | CakTC39850 | (GA)11    | 1264 | 1285 | --         | TUB      |                        |                       |             |     |
| CakTSSR03929 | CakTC39858 | (TTG)6    | 545  | 562  | --         | --       | ATATGTTAGCACGTTCCATGT  | TCCACCACCATAAGTACAAGT | 54.73,54.59 | 163 |
| CakTSSR03930 | CakTC39861 | (AAT)6    | 122  | 139  | --         | --       | CAATCATTTTGAAGTTGATCC  | ATGAGAGAGGTTGAAGTTTCC | 54.71,55.01 | 144 |
| CakTSSR03931 | CakTC39864 | (CAC)5    | 350  | 364  | Root       | --       | GTTGTTGTCCATTTTGAAGCTC | GAAGAGAATGGTGAAGGTGAT | 54.67,55.71 | 166 |
| CakTSSR03932 | CakTC39864 | (GTT)7    | 939  | 959  | Root       | --       | GAGGAGTTGTGTTGTTTGA    | TCTCCATGAATAACGAAAGTG | 55.35,55.4  | 133 |
| CakTSSR03933 | CakTC39864 | (AT)9     | 1111 | 1128 | Root       | --       | CCATAAACTGAACCGATAAAA  | CTTCCCATCACTCACTACCTA | 54.57,54.39 | 166 |
| CakTSSR03934 | CakTC39867 | (TCT)5    | 1351 | 1365 | Flower bud | bHLH     | ACTCGAATATCTTCTGGCATT  | AAGATGACATGGACGAAGAC  | 55.58,55    | 172 |
| CakTSSR03935 | CakTC39869 | (TGG)5    | 581  | 595  | --         | --       | CAGGAGCACCAACATAATAAG  | AATTCAGCATGTTTACCCATA | 55.04,54.81 | 140 |
| CakTSSR03936 | CakTC39879 | (TGC)5    | 508  | 522  | --         | FHA      | AGATCGGTGATAAGGAGTTTT  | ACAGGCAGATGTCCATACTA  | 54.6,54.84  | 157 |
| CakTSSR03937 | CakTC39897 | (ATT)6    | 688  | 705  | --         | C2C2-Dof | CTGAGAAAGTTGTTTCCAAAA  | TACCAGAAGCTAAGGTATCA  | 54.77,55.15 | 151 |
| CakTSSR03938 | CakTC39899 | (ACA)5    | 136  | 150  | --         | G2-like  | ACTGTCCTTGCCGAGTATTA   | TACTACTTCACCTGGCTTTTG | 55.09,54.84 | 176 |
| CakTSSR03939 | CakTC39899 | (AG)7     | 1501 | 1514 | --         | G2-like  | AGGGTAGAAAACATGGAAAAG  | ATTTTGATTCTCTCAGATCC  | 55.09,54.86 | 145 |
| CakTSSR03940 | CakTC39902 | (AGA)5    | 1104 | 1118 | --         | --       | AGATTGAAAGAGGAGGTGAAT  | GAAACAAATAGGGTGATCCAT | 54.53,55.51 | 147 |
| CakTSSR03941 | CakTC39906 | (AG)6     | 74   | 85   | --         | --       |                        |                       |             |     |
| CakTSSR03942 | CakTC39929 | (TTC)5    | 92   | 106  | --         | --       |                        |                       |             |     |
| CakTSSR03943 | CakTC39933 | (CAA)5    | 1    | 15   | --         | --       |                        |                       |             |     |
| CakTSSR03944 | CakTC39951 | (GA)9     | 1547 | 1564 | --         | --       |                        |                       |             |     |
| CakTSSR03945 | CakTC39967 | (ATA)5    | 300  | 314  | --         | --       | GAACAATTACCACCAACAGAA  | GGAAATGAGAAGAGGGAGAT  | 55.15,54.83 | 138 |
| CakTSSR03946 | CakTC39969 | (TGA)5    | 1255 | 1269 | --         | --       | CAAGAGTTTGAGAGAGAAACG  | TCTCTCTCTCTCCTTTCAT   | 54.48,54.81 | 154 |
| CakTSSR03947 | CakTC39969 | (AGA)5    | 1437 | 1451 | --         | --       | TGAAGGAAGGTATCAAAGAGA  | TTTTCCTAAAGCTTCCATCTT | 54.17,55.06 | 147 |
| CakTSSR03948 | CakTC39970 | (AAC)5    | 98   | 112  | --         | --       |                        |                       |             |     |
| CakTSSR03949 | CakTC39975 | (AG)7     | 27   | 40   | --         | --       |                        |                       |             |     |
| CakTSSR03950 | CakTC39992 | (CTT)7    | 124  | 144  | --         | --       | ACTACCAAAACCATTTTCTTT  | TCGGATATAATGTCGCTTTAC | 54.56,54.66 | 149 |
| CakTSSR03951 | CakTC40000 | (GA)13    | 1162 | 1187 | --         | LOB      | ATGGAGGCGAATATATAGGAG  | TTTAAAGAAACAACTGCGTTC | 55.09,54.97 | 151 |
| CakTSSR03952 | CakTC40003 | (CT)13    | 17   | 42   | --         | --       |                        |                       |             |     |
| CakTSSR03953 | CakTC40021 | (TTC)5    | 219  | 233  | --         | --       | TGGATAAGATGAAGCAAAAAG  | ATTTCCAGTCTTGTCTTAGC  | 54.82,55.22 | 151 |
| CakTSSR03954 | CakTC40022 | (GA)8     | 34   | 49   | --         | --       |                        |                       |             |     |
| CakTSSR03955 | CakTC40024 | (TGG)5    | 1581 | 1595 | --         | --       | TGAAGAAGGGAAGGAAAGTT   | CCCAAAGAGAAAGGAATAAGA | 54.92,55.3  | 151 |

|              |            |           |      |      |    |         |                       |                        |             |     |
|--------------|------------|-----------|------|------|----|---------|-----------------------|------------------------|-------------|-----|
| CakTSSR03956 | CakTC40031 | (TC)12    | 1    | 24   | -- | --      |                       |                        |             |     |
| CakTSSR03957 | CakTC40034 | (GAG)6    | 79   | 96   | -- | --      |                       |                        |             |     |
| CakTSSR03958 | CakTC40039 | (GCT)5    | 668  | 682  | -- | --      | CCTCCTCAACGCTTCTATTT  | ATTTGAATAACTGAAGCACCA  | 55.23,54.99 | 158 |
| CakTSSR03959 | CakTC40043 | (GAA)5    | 208  | 222  | -- | --      | AAGCTTGCTGGGTTAGTAAT  | GGTGGTGATTCTCCTTATTCT  | 55.04,54.82 | 161 |
| CakTSSR03960 | CakTC40044 | (CTT)6    | 706  | 723  | -- | --      | TCTTTCGTAACGATTACATT  | GGTGAGACCGAATAGTTCAC   | 54.99,54.58 | 149 |
| CakTSSR03961 | CakTC40061 | (TCTTC)5  | 1050 | 1074 | -- | --      | GTTTGATCTCATGTCTCTCCA | TGTTGTATTAGAAGCGGTGAT  | 55.16,55.02 | 146 |
| CakTSSR03962 | CakTC40076 | (TC)6     | 41   | 52   | -- | --      |                       |                        |             |     |
| CakTSSR03963 | CakTC40077 | (AAAAAT)5 | 1115 | 1144 | -- | --      | CGAGTTAATCTTCTCGTGAG  | TTCGATTCAAAGAACCATCTA  | 54.46,55.05 | 153 |
| CakTSSR03964 | CakTC40083 | (TC)15    | 1342 | 1371 | -- | --      |                       |                        |             |     |
| CakTSSR03965 | CakTC40084 | (CT)9     | 19   | 36   | -- | --      |                       |                        |             |     |
| CakTSSR03966 | CakTC40091 | (TA)9     | 44   | 61   | -- | --      |                       |                        |             |     |
| CakTSSR03967 | CakTC40115 | (GA)7     | 1575 | 1588 | -- | --      |                       |                        |             |     |
| CakTSSR03968 | CakTC40116 | (CAA)5    | 383  | 397  | -- | zf-HD   | TAGATGTTAGAGCCATGGACA | GATTTTGGTGTTGTTGTGT    | 55.86,55.05 | 152 |
| CakTSSR03969 | CakTC40137 | (TA)7     | 61   | 74   | -- | --      |                       |                        |             |     |
| CakTSSR03970 | CakTC40146 | (TGA)9    | 1298 | 1324 | -- | --      | GAGTTGTGGTTGGTAGTTTGA | CTCACTTCTCATCACCATCAT  | 55.22,55.03 | 157 |
| CakTSSR03971 | CakTC40153 | (AT)6     | 218  | 229  | -- | --      | GAGTGAAAGAATGCACCATTA | TCTTAGTGACGATGTTGATGA  | 55.39,54.2  | 150 |
| CakTSSR03972 | CakTC40157 | (TGA)6    | 1201 | 1218 | -- | --      | TCAAGTGTAGCTGAGGACAAT | GCTGTAAAAATGTGGACTCTG  | 55.04,55.05 | 145 |
| CakTSSR03973 | CakTC40164 | (TC)7     | 35   | 48   | -- | --      |                       |                        |             |     |
| CakTSSR03974 | CakTC40170 | (CCT)5    | 445  | 459  | -- | --      | TAGACGACTTCTCCTCTCCT  | AGAGGGAGGTTAGTGATTGAG  | 54.93,55.06 | 167 |
| CakTSSR03975 | CakTC40177 | (GAA)5    | 605  | 619  | -- | --      | ATTGAGGTTGAGTTGAAGTT  | AACACCCCTCTCTAAATTGTT  | 55.38,54.53 | 150 |
| CakTSSR03976 | CakTC40191 | (AAG)5    | 986  | 1000 | -- | --      | CTGTGAATGAAAAGGAAGAGA | ACCTTTGCTTCTTCAACTTCT  | 54.65,55.02 | 148 |
| CakTSSR03977 | CakTC40191 | (CATG)5   | 1232 | 1251 | -- | --      | AAAATAAGGTTCTTGCTTTGG | TTCTGAAGAGACACTATGTTGC | 55.4,54.77  | 154 |
| CakTSSR03978 | CakTC40192 | (TC)6     | 39   | 50   | -- | --      |                       |                        |             |     |
| CakTSSR03979 | CakTC40200 | (GA)6     | 1148 | 1159 | -- | --      | GAGTAGGGAATCTGGGAGAG  | AAAGGCTACGAATTTTCAGTT  | 55.37,55.01 | 159 |
| CakTSSR03980 | CakTC40201 | (GAA)12   | 1695 | 1730 | -- | G2-like |                       |                        |             |     |
| CakTSSR03981 | CakTC40206 | (CTC)5    | 758  | 772  | -- | --      | TCTTAATCTCAAATCGTCGTC | TAGGTGAAGTTTCGCTACAAG  | 54.62,54.99 | 152 |
| CakTSSR03982 | CakTC40209 | (GAA)6    | 1121 | 1138 | -- | --      | GGGAATGTGAGTTTGTTTGA  | ATTCCACAGTTCCTCTGAGAC  | 55.15,55.8  | 169 |
| CakTSSR03983 | CakTC40213 | (GCC)5    | 68   | 82   | -- | C3H     |                       |                        |             |     |
| CakTSSR03984 | CakTC40214 | (TTG)5    | 870  | 884  | -- | --      | TGTTCTGATTTTCCATGTTCT | TACCCAAATGAAATCAGTGAC  | 54.77,55.06 | 145 |
| CakTSSR03985 | CakTC40214 | (GT)6     | 1314 | 1325 | -- | --      | TTGAAAGGGTTGTGAAGATTA | AGGAATGGTTCTTGATCTTGT  | 54.97,55.3  | 140 |
| CakTSSR03986 | CakTC40222 | (AGC)5    | 36   | 50   | -- | --      |                       |                        |             |     |
| CakTSSR03987 | CakTC40222 | (TCT)5    | 187  | 201  | -- | --      | AAATTCAAATCATCGGAGACT | GTGAAAGTGAACCTTTGTTGG  | 55.39,54.94 | 134 |
| CakTSSR03988 | CakTC40225 | (TAA)6    | 776  | 793  | -- | TCP     | CAATCATCATCTGCTCATTCT | GATGTAAAACCTATTCCACCA  | 55.3,55.06  | 149 |
| CakTSSR03989 | CakTC40235 | (CCA)5    | 106  | 120  | -- | --      | CCTGAACATTGACGAATTAAC | GGTGGCTAAGTTTGTGTTAG   | 54.99,53.62 | 149 |
| CakTSSR03990 | CakTC40238 | (GGT)5    | 719  | 733  | -- | --      | AGGAAATTAATGGGTGAAGAT | TTCTCTCCAATGTTTCTCA    | 54.39,55.08 | 146 |
| CakTSSR03991 | CakTC40245 | (TGT)5    | 410  | 424  | -- | OFP     | TCCTGGTGAATTAACAGAGTT | ACCCAACAATAAAGAACACAA  | 53.95,54.75 | 157 |
| CakTSSR03992 | CakTC40245 | (GAA)6    | 731  | 748  | -- | OFP     | TGTTCTGAATTCGTTCAGG   | ACTTCTCTGTCTATGCAGGT   | 55.44,55.57 | 150 |

|              |            |           |      |      |            |             |                        |                       |             |     |
|--------------|------------|-----------|------|------|------------|-------------|------------------------|-----------------------|-------------|-----|
| CakTSSR03993 | CakTC40248 | (TCA)5    | 77   | 91   | Shoot      | --          |                        |                       |             |     |
| CakTSSR03994 | CakTC40254 | (GAA)5    | 67   | 81   | --         | --          |                        |                       |             |     |
| CakTSSR03995 | CakTC40265 | (TTA)5    | 7    | 21   | --         | --          |                        |                       |             |     |
| CakTSSR03996 | CakTC40275 | (TCA)5    | 115  | 129  | --         | --          | CCATCATTTCACGAAGAATAA  | GAAAAGTGGAAAAGGAAGAAG | 55.33,54.94 | 150 |
| CakTSSR03997 | CakTC40285 | (GA)6     | 748  | 759  | --         | --          |                        |                       |             |     |
| CakTSSR03998 | CakTC40287 | (TC)15    | 33   | 62   | --         | --          |                        |                       |             |     |
| CakTSSR03999 | CakTC40312 | (AAT)9    | 135  | 161  | --         | PLATZ       | AAAGGCTCCTGTGATATTTT   | TCAATATTCACCTTTGGATCA | 54.78,55.58 | 139 |
| CakTSSR04000 | CakTC40312 | (AG)10    | 993  | 1012 | --         | PLATZ       |                        |                       |             |     |
| CakTSSR04001 | CakTC40313 | (TA)8     | 256  | 271  | --         | --          | CCGAATGTGTTATCGATTAT   | TGAAGAAGACGGAATAGTGAG | 54.35,54.69 | 136 |
| CakTSSR04002 | CakTC40315 | (GGA)6    | 853  | 870  | --         | --          | GCATTTCCTTCCTCTATGGAT  | GCCATCAGAACCTATTGATAA | 55.08,54.44 | 159 |
| CakTSSR04003 | CakTC40315 | (TC)9     | 1968 | 1985 | --         | --          |                        |                       |             |     |
| CakTSSR04004 | CakTC40316 | (CTT)6    | 178  | 195  | Flower bud | bHLH        | CCCTCTTTTCATTCTCTCAT   | TCTCTTTGAGGAAGAACGTG  | 55.12,55.59 | 156 |
| CakTSSR04005 | CakTC40321 | (TGG)5    | 598  | 612  | --         | --          | GTGTTTGTATTGGGTCAA     | CTAAATCCAGAACCCATT    | 55.16,54.38 | 158 |
| CakTSSR04006 | CakTC40329 | (TCG)5    | 1880 | 1894 | --         | --          | GCTTGAATTCTGTCTCTGA    | GAAGAACAAAACGACGACTAC | 54.8,54.19  | 145 |
| CakTSSR04007 | CakTC40337 | (GA)9     | 197  | 214  | --         | --          | GGTGAAGTCTCAACTCAAGTG  | CGTCGATGAAGTACTCAAAGT | 54.89,54.63 | 154 |
| CakTSSR04008 | CakTC40338 | (TA)6     | 2148 | 2159 | --         | --          |                        |                       |             |     |
| CakTSSR04009 | CakTC40342 | (GAAAGT)5 | 341  | 370  | --         | --          | CGATAAAATGAGAACGAGAA   | CTGCTAGAACCATGATGAC   | 54.82,54.95 | 153 |
| CakTSSR04010 | CakTC40343 | (AGA)6    | 289  | 306  | --         | CCHC        | CCGTATTGAATGTACCAACAG  | TCCTTTCTTCTTCTCAACC   | 55.64,55.32 | 136 |
| CakTSSR04011 | CakTC40344 | (TC)6     | 1    | 12   | --         | --          |                        |                       |             |     |
| CakTSSR04012 | CakTC40350 | (GTG)6    | 636  | 653  | --         | --          | GCATGTGCTTGATTACTTTTC  | AACACCAATCTCAAATTTCC  | 55.14,55.71 | 168 |
| CakTSSR04013 | CakTC40352 | (AG)6     | 739  | 750  | --         | --          |                        |                       |             |     |
| CakTSSR04014 | CakTC40358 | (CAA)5    | 384  | 398  | --         | GRAS        | ACTTTAGCAGAATTCAGACC   | AGATAAAGGGGAATTGTTTTG | 55.22,55.03 | 147 |
| CakTSSR04015 | CakTC40361 | (TAT)5    | 336  | 350  | --         | --          | ATGAAAACATGCAAAGTACT   | AGGCAAGAAAGTGGATAAAGT | 54.88,54.84 | 158 |
| CakTSSR04016 | CakTC40363 | (TCA)5    | 468  | 482  | --         | --          | AATTGTTTATGCTCTCCAACA  | CCTTGTTAGCATCACCATTAG | 54.99,55.04 | 151 |
| CakTSSR04017 | CakTC40366 | (CTC)5    | 540  | 554  | --         | --          | CTCATTCTTTATTGCACACC   | AGATGGAAAAGGATGAAAAAG | 54.99,55.13 | 150 |
| CakTSSR04018 | CakTC40380 | (GTT)7    | 671  | 691  | Flower bud | --          | CACAACAAGAGCTTTAGATTCA | TCTCTGTCTTTCAACCAAT   | 54.97,54.83 | 151 |
| CakTSSR04019 | CakTC40386 | (TGT)5    | 1835 | 1849 | --         | WI/SNF-BAF6 | TCGAACGCTGGTAGTAGTAG   | ACAACAACCATCACATTTTTC | 55.03,54.97 | 155 |
| CakTSSR04020 | CakTC40390 | (GA)11    | 1    | 22   | --         | --          |                        |                       |             |     |
| CakTSSR04021 | CakTC40402 | (TC)6     | 65   | 76   | --         | --          |                        |                       |             |     |
| CakTSSR04022 | CakTC40402 | (ATC)5    | 624  | 638  | --         | --          | TGCAGAAAGTCAAATCAAAC   | ATCTCCAACCTGAGAAGTGCT | 55.6,55.7   | 150 |
| CakTSSR04023 | CakTC40408 | (TTC)5    | 96   | 110  | --         | --          |                        |                       |             |     |
| CakTSSR04024 | CakTC40411 | (GAA)5    | 2183 | 2197 | --         | --          |                        |                       |             |     |
| CakTSSR04025 | CakTC40414 | (ACA)6    | 196  | 213  | Flower bud | --          | AAACCCCTCTTCTAACTCAA   | TGAAGCCTAAGAGATTCAAAA | 54.82,54.54 | 150 |
| CakTSSR04026 | CakTC40422 | (CAC)5    | 327  | 341  | --         | --          | CCCCTCAACTACAATAATTC   | TAAGAAAGTGTCCAGTCACG  | 53.14,55.56 | 139 |
| CakTSSR04027 | CakTC40423 | (AAC)6    | 210  | 227  | --         | --          | AGGATGAAGCTTCTAGACGAG  | CTCTTCCTTCTCTCCTTTA   | 55.54,54.63 | 161 |
| CakTSSR04028 | CakTC40424 | (AAG)6    | 107  | 124  | --         | --          | CGTTCAACATTGTTTAAAGATG | CAACTTTGTATCCCATGAAAC | 55.11,54.67 | 148 |
| CakTSSR04029 | CakTC40427 | (TC)10    | 56   | 75   | --         | --          |                        |                       |             |     |

|              |            |         |      |      |             |             |                       |                        |             |     |
|--------------|------------|---------|------|------|-------------|-------------|-----------------------|------------------------|-------------|-----|
| CakTSSR04030 | CakTC40434 | (AATA)7 | 731  | 758  | --          | --          |                       |                        |             |     |
| CakTSSR04031 | CakTC40450 | (TTC)6  | 1973 | 1990 | --          | --          |                       |                        |             |     |
| CakTSSR04032 | CakTC40464 | (TC)7   | 60   | 73   | --          | --          |                       |                        |             |     |
| CakTSSR04033 | CakTC40469 | (GA)9   | 923  | 940  | --          | --          |                       |                        |             |     |
| CakTSSR04034 | CakTC40480 | (GAA)5  | 91   | 105  | --          | Bromodomain |                       |                        |             |     |
| CakTSSR04035 | CakTC40480 | (GAC)5  | 776  | 790  | --          | Bromodomain | ACGTGTTCTTGGTATGCTCTA | GTTGTGGTGGTTCATCAT     | 55.09,54.81 | 159 |
| CakTSSR04036 | CakTC40497 | (TGT)5  | 745  | 759  | Shoot       | --          | GGAGTTTGTGCAGAGACATAG | CAAAAACATGATTACCCCTCAA | 55.04,55.25 | 145 |
| CakTSSR04037 | CakTC40512 | (CA)7   | 195  | 208  | --          | --          | CATCACTCTTCTCCACCACTA | CAATTGAAAAAGGAAGTGGAT  | 55.3,55.87  | 147 |
| CakTSSR04038 | CakTC40517 | (TAT)5  | 395  | 409  | --          | --          | GTAGTCATGTGGGGATTGTAA | AAAAGAGCCAGAGAAGAAAAA  | 54.93,55.24 | 141 |
| CakTSSR04039 | CakTC40520 | (AG)10  | 705  | 724  | --          | --          |                       |                        |             |     |
| CakTSSR04040 | CakTC40534 | (TCT)7  | 132  | 152  | --          | --          | TGTGGTAGATGATGAAGAAGG | AGAATTGCATTACGGTACTTG  | 55.23,54.64 | 147 |
| CakTSSR04041 | CakTC40544 | (AG)15  | 2398 | 2427 | --          | --          |                       |                        |             |     |
| CakTSSR04042 | CakTC40547 | (GTT)5  | 231  | 245  | --          | --          | TGGGAGGGTTTTTGTAGTAGT | ACCCTTATAATCCAACACCAT  | 55.43,55    | 138 |
| CakTSSR04043 | CakTC40547 | (TG)8   | 627  | 642  | --          | --          | AAGATGGGAAACCAAAAATAG | GTGACAAAACACATGTAACCA  | 55.03,54.34 | 163 |
| CakTSSR04044 | CakTC40555 | (TC)7   | 13   | 26   | --          | --          |                       |                        |             |     |
| CakTSSR04045 | CakTC40557 | (TC)12  | 641  | 664  | --          | --          |                       |                        |             |     |
| CakTSSR04046 | CakTC40560 | (ATA)5  | 406  | 420  | --          | --          | TCITTCACATGCAACCAAGT  | TCCTATTCCCTTTCTTACCAC  | 55.05,55.01 | 150 |
| CakTSSR04047 | CakTC40562 | (TAT)6  | 171  | 188  | --          | --          | ATAAACAGATCTGACATCCA  | TGCAGTTACTCGGATACTTGT  | 54.55,55.09 | 211 |
| CakTSSR04048 | CakTC40566 | (TC)8   | 45   | 60   | --          | --          |                       |                        |             |     |
| CakTSSR04049 | CakTC40577 | (ATC)6  | 1875 | 1892 | --          | --          | AAGAAGTTGCAGAGACAGTTG | TAATTAACACGCAAAAACCTCC | 54.82,54.79 | 160 |
| CakTSSR04050 | CakTC40583 | (CCT)6  | 87   | 104  | --          | --          |                       |                        |             |     |
| CakTSSR04051 | CakTC40585 | (TC)6   | 49   | 60   | --          | --          |                       |                        |             |     |
| CakTSSR04052 | CakTC40587 | (ATTC)6 | 86   | 109  | --          | --          |                       |                        |             |     |
| CakTSSR04053 | CakTC40598 | (ATA)6  | 410  | 427  | --          | --          | TCTTAATCCCTCTCTCTCCAC | TCAACATATCTGGATCCATTTC | 55.1,54.89  | 144 |
| CakTSSR04054 | CakTC40603 | (CAT)5  | 758  | 772  | --          | --          | ACATTAGGCCCTTCAAGTTAC | TCCATGTGATTCTTCTCTTTG  | 55.11,55.36 | 169 |
| CakTSSR04055 | CakTC40604 | (TTC)6  | 698  | 715  | --          | --          |                       |                        |             |     |
| CakTSSR04056 | CakTC40612 | (AGA)5  | 385  | 399  | --          | --          | GCTGAAGATTCAATTTGCTTA | GGCATGAAACTTTCTGTTAAA  | 54.96,54.73 | 152 |
| CakTSSR04057 | CakTC40628 | (GAC)6  | 533  | 550  | --          | --          | TAGAAAGTTCCAACAATCTGC | AACTCCAGAACCTCTAGCAAC  | 54.7,55.29  | 154 |
| CakTSSR04058 | CakTC40637 | (GA)20  | 2026 | 2065 | --          | WRKY        |                       |                        |             |     |
| CakTSSR04059 | CakTC40642 | (CT)10  | 1    | 20   | --          | --          |                       |                        |             |     |
| CakTSSR04060 | CakTC40642 | (CAA)5  | 782  | 796  | --          | --          | CTCCGTTAGAGAAATGTGAAG | GCTCTTTTTCATGGCTTTACT  | 54.3,55.53  | 146 |
| CakTSSR04061 | CakTC40647 | (AAT)5  | 957  | 971  | --          | --          | GAAATTAGGGAGGGAATTGTA | ATTCTTCAATCCCAAAAACCTC | 54.95,54.97 | 149 |
| CakTSSR04062 | CakTC40666 | (TGG)6  | 776  | 793  | --          | OFP         | GTCGTCGGAGAAATAGTCTTC | CTCAAAATCTCTCCCAACCT   | 55.62,54.99 | 153 |
| CakTSSR04063 | CakTC40669 | (AAT)17 | 6    | 56   | --          | --          |                       |                        |             |     |
| CakTSSR04064 | CakTC40671 | (TAA)6  | 7    | 24   | Mature Leaf | --          |                       |                        |             |     |
| CakTSSR04065 | CakTC40672 | (TA)6   | 550  | 561  | --          | G2-like     | AACATAGTTGTTGGCAACAT  | GTAAATTACCGTGTGTTGTCG  | 54.77,54.97 | 144 |
| CakTSSR04066 | CakTC40672 | (GCT)5  | 973  | 987  | --          | G2-like     | GAAGCATTAGCTGATTCCATA | GACACTTGAGAAATCCCTTTT  | 54.76,55.03 | 142 |

|              |            |        |      |      |            |          |                        |                       |             |     |
|--------------|------------|--------|------|------|------------|----------|------------------------|-----------------------|-------------|-----|
| CakTSSR04067 | CakTC40672 | (AG)10 | 1930 | 1949 | --         | G2-like  |                        |                       |             |     |
| CakTSSR04068 | CakTC40682 | (TTG)5 | 1545 | 1559 | --         | --       | ACCTTTGAGTAACCCCTTGAAC | GTAGCTTCTGAATCAAACACG | 54.98,55.22 | 169 |
| CakTSSR04069 | CakTC40685 | (TCT)5 | 245  | 259  | --         | Trihelix | AACTGTGTCCACTGATGAAAG  | TGAAGTTGAAGCAAAAGAAGA | 55.2,55.48  | 151 |
| CakTSSR04070 | CakTC40688 | (TTC)7 | 104  | 124  | --         | --       | AAGAACTAACGCAATGTTTGT  | GAGTGAAGAAGGTTTTGGTT  | 54.85,55.11 | 151 |
| CakTSSR04071 | CakTC40693 | (CT)6  | 18   | 29   | --         | --       |                        |                       |             |     |
| CakTSSR04072 | CakTC40695 | (TA)9  | 56   | 73   | --         | --       |                        |                       |             |     |
| CakTSSR04073 | CakTC40700 | (ATA)5 | 176  | 190  | --         | --       | CAGATTTATCCTTTTCGTGTG  | CCGTTTATGATGATGATTGTT | 55,55.03    | 159 |
| CakTSSR04074 | CakTC40702 | (AT)10 | 653  | 672  | --         | --       |                        |                       |             |     |
| CakTSSR04075 | CakTC40704 | (ATT)7 | 194  | 214  | --         | --       | TTTCCGGATTATTTTCAGA    | GATAACGACGTGTGATGATT  | 54.97,55.09 | 152 |
| CakTSSR04076 | CakTC40711 | (CCA)5 | 950  | 964  | --         | --       | AATATGCCTATGAGCATCTGA  | TTGAAGGTGTTAAATTGGTTG | 55.02,55.33 | 148 |
| CakTSSR04077 | CakTC40717 | (CAT)5 | 101  | 115  | Flower bud | --       | TTTGGGAATAGGAAATAAAGG  | GTGATGGAATGATTGATTTTG | 55.13,55.4  | 146 |
| CakTSSR04078 | CakTC40720 | (TGT)5 | 233  | 247  | --         | --       | AGCTCTTCCTTGTAGTTGGAG  | TCAAATATTTCAAGAGCAAGC | 55.46,54.96 | 154 |
| CakTSSR04079 | CakTC40747 | (CAA)7 | 301  | 321  | --         | --       | CGGAAACTTCTTCTCTTACC   | GGTCTGAAGGGTTGATAGAGT | 54.97,54.88 | 171 |
| CakTSSR04080 | CakTC40771 | (CT)6  | 1    | 12   | --         | --       |                        |                       |             |     |
| CakTSSR04081 | CakTC40774 | (CAG)5 | 761  | 775  | --         | LIM      | CTGAACCAATTGAAGTTGAAG  | AAACCTAGCTCCAAAACAAAG | 55.03,55.47 | 151 |
| CakTSSR04082 | CakTC40790 | (TAA)5 | 186  | 200  | --         | --       | CAGTTGAAGGAAGACAAAATG  | TAACCTCAACGAATGGTGAT  | 55.03,55.5  | 150 |
| CakTSSR04083 | CakTC40793 | (TCA)8 | 534  | 557  | --         | --       | CAAGTCCCTACCTTTGAGAGT  | AGGAACACAAGGGGTATAAAA | 55.14,55.36 | 177 |
| CakTSSR04084 | CakTC40794 | (CTT)6 | 115  | 132  | --         | --       | TTCTTCTGTTTCTCTCTTCTT  | GGTTCACTATGAAATCAGCAC | 54.92,54.79 | 154 |
| CakTSSR04085 | CakTC40797 | (GAT)5 | 1778 | 1792 | --         | --       | ACCTGTGATGAAGTGAATGAG  | GACACACACAATACAGAGCA  | 55.11,54.66 | 149 |
| CakTSSR04086 | CakTC40824 | (AAC)5 | 229  | 243  | --         | --       | ACACCAAGAAGTTTGTGAAA   | AATGGAAGCCCTATTATTGTT | 54.94,54.61 | 168 |
| CakTSSR04087 | CakTC40836 | (GAA)5 | 1894 | 1908 | --         | --       |                        |                       |             |     |
| CakTSSR04088 | CakTC40842 | (TC)6  | 41   | 52   | --         | --       |                        |                       |             |     |
| CakTSSR04089 | CakTC40846 | (GAA)5 | 566  | 580  | --         | --       | CAAAAAGTGGTGAGAAAGATG  | GTGCAAGACAATGGCTATATT | 55.03,54.55 | 158 |
| CakTSSR04090 | CakTC40857 | (TC)6  | 49   | 60   | --         | --       |                        |                       |             |     |
| CakTSSR04091 | CakTC40858 | (CT)7  | 37   | 50   | --         | --       |                        |                       |             |     |
| CakTSSR04092 | CakTC40873 | (CAT)7 | 1627 | 1647 | --         | --       | CTGCTGAAACTTCTCAAAAAT  | GTCCATTGGATCAACAATTA  | 54.04,55    | 159 |
| CakTSSR04093 | CakTC40873 | (AG)6  | 1998 | 2009 | --         | --       |                        |                       |             |     |
| CakTSSR04094 | CakTC40875 | (AG)6  | 2016 | 2027 | --         | --       | CGTAAATTCACAAACAAGAGG  | AAACAAACAATCCCTTTCTTC | 55.08,55.04 | 148 |
| CakTSSR04095 | CakTC40877 | (GAA)5 | 645  | 659  | --         | --       | AATAGGGACTTTGGTGTGT    | AAACTCTTCGTTGAGTTGTGA | 55.26,55.08 | 144 |
| CakTSSR04096 | CakTC40880 | (CA)9  | 55   | 72   | --         | --       |                        |                       |             |     |
| CakTSSR04097 | CakTC40889 | (TCT)7 | 86   | 106  | --         | --       |                        |                       |             |     |
| CakTSSR04098 | CakTC40890 | (CAA)5 | 1626 | 1640 | --         | TPR      | GGATGTCTGCTATGTTGTGT   | AACACTAACATGTCCATTGTC | 55.16,55.17 | 158 |
| CakTSSR04099 | CakTC40891 | (CT)9  | 15   | 32   | --         | --       |                        |                       |             |     |
| CakTSSR04100 | CakTC40893 | (AGA)6 | 218  | 235  | --         | --       | TAAGGAAGGAAGAAAAGAGGA  | GTAAATTTGAAAACCCTTTCC | 55.02,54.63 | 144 |
| CakTSSR04101 | CakTC40906 | (AT)7  | 775  | 788  | --         | --       |                        |                       |             |     |
| CakTSSR04102 | CakTC40907 | (CCA)5 | 698  | 712  | --         | MYB      | TTCTTTTCTCTCTCGTTAT    | GGTTGAGGTACCGAGTTATTC | 54.89,55.34 | 134 |
| CakTSSR04103 | CakTC40908 | (ATA)9 | 253  | 279  | --         | --       | GGCAACTTCTCAAAAGAAAA   | GGGGTCTTTATGGCTATGTAT | 54.82,54.85 | 147 |

|              |            |          |      |      |    |    |                        |                        |             |     |
|--------------|------------|----------|------|------|----|----|------------------------|------------------------|-------------|-----|
| CakTSSR04104 | CakTC40910 | (CCA)6   | 1311 | 1328 | -- | -- | AGCAGGAATAGGTTTCTTACC  | GATAATTGGGCTTCGGTTA    | 54.39,55.25 | 156 |
| CakTSSR04105 | CakTC40917 | (TC)11   | 9    | 30   | -- | -- |                        |                        |             |     |
| CakTSSR04106 | CakTC40919 | (AG)8    | 2190 | 2205 | -- | -- |                        |                        |             |     |
| CakTSSR04107 | CakTC40922 | (AAG)5   | 1929 | 1943 | -- | -- | TCGCTATCATCTTAATTGGTT  | CCCAGAGAGAGAAAAGAGAGAG | 54.23,55.05 | 144 |
| CakTSSR04108 | CakTC40925 | (TTC)9   | 809  | 835  | -- | -- |                        |                        |             |     |
| CakTSSR04109 | CakTC40940 | (AGA)6   | 1718 | 1735 | -- | -- | TTCGTCGTTTAGACAACTCAT  | TCCTCTCATTACTGTCAACCAC | 55.05,55.11 | 147 |
| CakTSSR04110 | CakTC40940 | (GA)9    | 2027 | 2044 | -- | -- |                        |                        |             |     |
| CakTSSR04111 | CakTC40943 | (CTT)7   | 74   | 94   | -- | -- |                        |                        |             |     |
| CakTSSR04112 | CakTC40946 | (ATT)5   | 1920 | 1934 | -- | -- | TCATCTTCCAATTCTTGAAAC  | CTTGTTATCTCAAAAGCAAGC  | 54.42,54.64 | 135 |
| CakTSSR04113 | CakTC40962 | (AAAAT)7 | 586  | 620  | -- | -- | AATCTCTGACATGTTTGCTA   | GGGAAAACAAAATAACACAAG  | 54.97,55.56 | 159 |
| CakTSSR04114 | CakTC40967 | (AG)7    | 2135 | 2148 | -- | -- |                        |                        |             |     |
| CakTSSR04115 | CakTC40987 | (GAC)5   | 1978 | 1992 | -- | -- |                        |                        |             |     |
| CakTSSR04116 | CakTC40991 | (TCT)5   | 1728 | 1742 | -- | -- | GGATGTGATCGGTATTATTGA  | GGATCTTCTCCATTACAAAT   | 54.95,55.63 | 157 |
| CakTSSR04117 | CakTC40994 | (TTC)9   | 1791 | 1817 | -- | -- | CCAAAAGAGGAAGTGAGAGAT  | TCTACTCCAACCTCAACTCAA  | 55.18,55.01 | 159 |
| CakTSSR04118 | CakTC41004 | (GA)7    | 560  | 573  | -- | -- |                        |                        |             |     |
| CakTSSR04119 | CakTC41015 | (AG)13   | 576  | 601  | -- | -- |                        |                        |             |     |
| CakTSSR04120 | CakTC41019 | (TAT)5   | 1893 | 1907 | -- | -- |                        |                        |             |     |
| CakTSSR04121 | CakTC41037 | (ATT)6   | 1970 | 1987 | -- | -- |                        |                        |             |     |
| CakTSSR04122 | CakTC41048 | (CAT)7   | 1733 | 1753 | -- | -- | CTCTTCTTCTTCTCGAGCTT   | GCTAGTGAGGACTCCTTGCT   | 54.98,55.28 | 155 |
| CakTSSR04123 | CakTC41054 | (GAA)5   | 516  | 530  | -- | -- | AAATGGAAGTCGACAGTTACA  | CAGGCAAAGAAGAGTTTAC    | 54.89,55.16 | 144 |
| CakTSSR04124 | CakTC41077 | (AAG)5   | 654  | 668  | -- | -- |                        |                        |             |     |
| CakTSSR04125 | CakTC41099 | (AG)7    | 674  | 687  | -- | -- |                        |                        |             |     |
| CakTSSR04126 | CakTC41104 | (CAA)6   | 273  | 290  | -- | -- | AGGAGAAACACCTTCAGTTCT  | TATAAGTGATCGTTCCTCCAA  | 54.67,54.92 | 156 |
| CakTSSR04127 | CakTC41105 | (TC)7    | 6    | 19   | -- | -- |                        |                        |             |     |
| CakTSSR04128 | CakTC41106 | (GTG)6   | 2544 | 2561 | -- | -- | ATGAAGAAATGTTGTTGTTGG  | TACATGGTGATGAGATTGAGG  | 55.15,55.96 | 147 |
| CakTSSR04129 | CakTC41109 | (AGAA)5  | 74   | 93   | -- | -- |                        |                        |             |     |
| CakTSSR04130 | CakTC41131 | (TC)8    | 27   | 42   | -- | -- |                        |                        |             |     |
| CakTSSR04131 | CakTC41132 | (TTC)6   | 1209 | 1226 | -- | -- | GAAGAGGAGTTTTTCATCCAC  | CTGGTGAAGAACAGAATGAAG  | 55.42,55.01 | 155 |
| CakTSSR04132 | CakTC41144 | (AT)6    | 2203 | 2214 | -- | -- |                        |                        |             |     |
| CakTSSR04133 | CakTC41147 | (ATG)5   | 624  | 638  | -- | -- | AATGCAGTCAAATGTAAGGAA  | TAGCATCCGAATCATATTAT   | 54.99,54.8  | 146 |
| CakTSSR04134 | CakTC41162 | (TTA)7   | 656  | 676  | -- | -- | GCGAATGCAGGTAAAGTATAA  | ATTCAATTCATTCACCTGCTTA | 54.9,55.07  | 156 |
| CakTSSR04135 | CakTC41164 | (AG)26   | 650  | 701  | -- | -- |                        |                        |             |     |
| CakTSSR04136 | CakTC41169 | (AAG)8   | 2065 | 2088 | -- | -- | AAAAGATCGAGGTTAAGGTTG  | ACGAAGAACAAAAGAGATCC   | 55.24,55.18 | 141 |
| CakTSSR04137 | CakTC41185 | (CT)10   | 2403 | 2422 | -- | -- |                        |                        |             |     |
| CakTSSR04138 | CakTC41189 | (AT)6    | 527  | 538  | -- | -- | CGTACATATGAAGCAAGGAAC  | GGATGAATATGTCATTTGGAA  | 55.02,54.92 | 165 |
| CakTSSR04139 | CakTC41194 | (CT)10   | 134  | 153  | -- | -- | TTCTATGTTTCACCTTTTGACG | CATGTTACTCGCATACACAGA  | 55.48,54.82 | 150 |
| CakTSSR04140 | CakTC41194 | (CTG)6   | 1232 | 1249 | -- | -- | ATCCTGAATCTGAAGTTCCTC  | AATACCAACTTCTCACTCCAC  | 54.92,55    | 166 |

|              |            |         |      |      |    |       |                        |                       |             |     |
|--------------|------------|---------|------|------|----|-------|------------------------|-----------------------|-------------|-----|
| CakTSSR04141 | CakTC41199 | (TC)12  | 178  | 201  | -- | --    | TCAAGCAAACCTCTCTTTCAG  | CAGTAACTGCTCCAATCAAAG | 55.07,55.23 | 147 |
| CakTSSR04142 | CakTC41206 | (GCA)5  | 461  | 475  | -- | --    | ACGGTCCTCCTTTTATACCTC  | CTGTTGCTGGAGAAGAATATG | 56.37,55.15 | 152 |
| CakTSSR04143 | CakTC41208 | (CAC)5  | 1530 | 1544 | -- | --    | CACCTCGAATAGTGTCACCT   | GAGTAGATGACGGTGGAGATA | 55.14,54.28 | 159 |
| CakTSSR04144 | CakTC41212 | (TTC)5  | 123  | 137  | -- | --    | TTTGTGTCTCTCTGAAAATA   | GAGACCAGAATATGTGAATGC | 54.97,54.7  | 149 |
| CakTSSR04145 | CakTC41214 | (TCT)7  | 2328 | 2348 | -- | --    |                        |                       |             |     |
| CakTSSR04146 | CakTC41218 | (TCA)6  | 91   | 108  | -- | --    |                        |                       |             |     |
| CakTSSR04147 | CakTC41219 | (GA)13  | 2470 | 2495 | -- | --    |                        |                       |             |     |
| CakTSSR04148 | CakTC41228 | (GAA)5  | 858  | 872  | -- | --    | AATACAACCCAACTACAACGA  | GTCATCACAGAGTCTTTTCG  | 54.79,55    | 159 |
| CakTSSR04149 | CakTC41230 | (CT)6   | 2423 | 2434 | -- | --    |                        |                       |             |     |
| CakTSSR04150 | CakTC41232 | (AG)8   | 324  | 339  | -- | HB    | AAAAAGGAGCGATAGAGAAAG  | TGAAGAGTTCTCAAACATCGT | 54.83,55    | 150 |
| CakTSSR04151 | CakTC41232 | (ACC)5  | 758  | 772  | -- | HB    | CCACAATTGAAAACCAAAAT   | GGGAAATTGAACATCTCTGAT | 55.07,55.63 | 163 |
| CakTSSR04152 | CakTC41232 | (TCT)6  | 1503 | 1520 | -- | HB    | GGTGGATTAGGAACGATTAAAC | CCAACTACAAAACCTCTCC   | 55.27,54.04 | 149 |
| CakTSSR04153 | CakTC41232 | (ATA)6  | 2338 | 2355 | -- | HB    | GCAGAAGGATCAGATACAGAA  | TTGGATCTCTTGATGTTGTT  | 54.58,54.77 | 152 |
| CakTSSR04154 | CakTC41232 | (TAT)5  | 2864 | 2878 | -- | HB    |                        |                       |             |     |
| CakTSSR04155 | CakTC41242 | (AGG)6  | 65   | 82   | -- | --    |                        |                       |             |     |
| CakTSSR04156 | CakTC41243 | (AG)6   | 2501 | 2512 | -- | --    |                        |                       |             |     |
| CakTSSR04157 | CakTC41245 | (TG)6   | 609  | 620  | -- | --    |                        |                       |             |     |
| CakTSSR04158 | CakTC41246 | (TG)7   | 368  | 381  | -- | --    | AGGGATGATTAAGGAATTTTG  | TATCAGTCTACCCATACTCC  | 54.95,54.11 | 148 |
| CakTSSR04159 | CakTC41248 | (CTT)6  | 2365 | 2382 | -- | --    | TAAACGAACCTCTTCAACAGG  | AACCTTCACCTAAACAAATCC | 54.8,54.92  | 155 |
| CakTSSR04160 | CakTC41249 | (GAA)6  | 206  | 223  | -- | --    | TCACATTACCCTGTTTATGCT  | GGATATTGAAGACCAGAGCTT | 54.86,55.14 | 163 |
| CakTSSR04161 | CakTC41253 | (ACT)6  | 8    | 25   | -- | ARR-B |                        |                       |             |     |
| CakTSSR04162 | CakTC41254 | (AAG)5  | 2368 | 2382 | -- | --    | TTGGGATGAAAGTGTTAGAAA  | AGTTGATCGATCTTCAATCCT | 54.97,55.38 | 142 |
| CakTSSR04163 | CakTC41262 | (TC)7   | 653  | 666  | -- | --    |                        |                       |             |     |
| CakTSSR04164 | CakTC41263 | (TC)9   | 21   | 38   | -- | --    |                        |                       |             |     |
| CakTSSR04165 | CakTC41281 | (ACT)5  | 546  | 560  | -- | bHLH  | CAGTGCTCAAGCAGCTATAAT  | TACAAACCAACCCTACACAG  | 55.09,55.27 | 152 |
| CakTSSR04166 | CakTC41288 | (TGC)5  | 246  | 260  | -- | WRKY  | ATTGATGATGAACCATTATGC  | ACAACAACAATCAACAACA   | 54.94,54.85 | 144 |
| CakTSSR04167 | CakTC41294 | (TC)7   | 1391 | 1404 | -- | --    |                        |                       |             |     |
| CakTSSR04168 | CakTC41302 | (TGA)5  | 2510 | 2524 | -- | --    |                        |                       |             |     |
| CakTSSR04169 | CakTC41304 | (AGAA)5 | 126  | 145  | -- | GRAS  | GTGATCTGTCATCGTTTCAAT  | AGGAAGCTTTGAGAAAGAGAA | 55.03,55.23 | 140 |
| CakTSSR04170 | CakTC41304 | (ACT)7  | 490  | 510  | -- | GRAS  | TGGATAACCCCTTTCTTCTTC  | AGCATTTGGTTTATGTAACGA | 55.13,55.04 | 145 |
| CakTSSR04171 | CakTC41304 | (TAG)7  | 899  | 919  | -- | GRAS  | AAGCCTTCTATATTGCAAAACC | CAAAATCCATCCCTAGAACTT | 55.35,55.01 | 151 |
| CakTSSR04172 | CakTC41313 | (CAT)5  | 330  | 344  | -- | --    | TAAAAAGCGAGGTGTACAGGAA | GCATTTGTATACTGGAAAACG | 55.4,55.04  | 170 |
| CakTSSR04173 | CakTC41314 | (TC)6   | 332  | 343  | -- | --    | ATTTCCTCTCTCGCTTTTGT   | GGCGACTGATCTGAAATAATC | 55.1,56.39  | 149 |
| CakTSSR04174 | CakTC41315 | (TA)7   | 58   | 71   | -- | --    |                        |                       |             |     |
| CakTSSR04175 | CakTC41335 | (TAA)5  | 715  | 729  | -- | --    |                        |                       |             |     |
| CakTSSR04176 | CakTC41338 | (TTC)9  | 418  | 444  | -- | --    | CTCGTTTCAACAAAAGTGAT   | GAATCCTCAAAAATCATCAGA | 54.63,54.33 | 150 |
| CakTSSR04177 | CakTC41343 | (TGT)5  | 574  | 588  | -- | MYB   | GGAAACTCCTTGAGACTCTTC  | TCAACAACAACCAGAAAAAT  | 54.72,55.64 | 147 |

|              |            |           |      |      |            |           |                         |                         |             |     |
|--------------|------------|-----------|------|------|------------|-----------|-------------------------|-------------------------|-------------|-----|
| CakTSSR04178 | CakTC41351 | (TGT)5    | 995  | 1009 | --         | --        |                         |                         |             |     |
| CakTSSR04179 | CakTC41363 | (TTG)5    | 92   | 106  | --         | --        |                         |                         |             |     |
| CakTSSR04180 | CakTC41377 | (AG)6     | 682  | 693  | --         | --        |                         |                         |             |     |
| CakTSSR04181 | CakTC41380 | (AAC)5    | 246  | 260  | --         | ARF       | ATACCATGAACTTGCCTAGC    | AAGCTCAGACACAAGTCTGAGAC | 56.07,54.6  | 143 |
| CakTSSR04182 | CakTC41397 | (CT)6     | 15   | 26   | --         | --        |                         |                         |             |     |
| CakTSSR04183 | CakTC41404 | (GA)10    | 615  | 634  | --         | AP2-EREBP |                         |                         |             |     |
| CakTSSR04184 | CakTC41413 | (CT)9     | 4    | 21   | --         | --        |                         |                         |             |     |
| CakTSSR04185 | CakTC41423 | (TC)8     | 20   | 35   | --         | --        |                         |                         |             |     |
| CakTSSR04186 | CakTC41425 | (TA)6     | 643  | 654  | --         | --        |                         |                         |             |     |
| CakTSSR04187 | CakTC41433 | (TAA)5    | 179  | 193  | --         | --        | CGTGCAAAAGCAATTAGTAGT   | GAGCTATAAGAGGGAAAATCG   | 55.03,55.02 | 146 |
| CakTSSR04188 | CakTC41439 | (TC)6     | 121  | 132  | --         | --        | ACAAGAAGGAAGAGAAGCAGT   | TGGATTATGTGTTGTTGATGA   | 55,54.79    | 150 |
| CakTSSR04189 | CakTC41441 | (AG)18    | 2    | 37   | --         | --        |                         |                         |             |     |
| CakTSSR04190 | CakTC41443 | (TTC)6    | 345  | 362  | --         | --        | ACTAGTATTTCCCAACCAAAA   | AATTCTGGAGCTTCTTGAAT    | 55.36,54.88 | 134 |
| CakTSSR04191 | CakTC41446 | (GA)6     | 703  | 714  | --         | --        |                         |                         |             |     |
| CakTSSR04192 | CakTC41452 | (TTA)5    | 27   | 41   | --         | --        |                         |                         |             |     |
| CakTSSR04193 | CakTC41452 | (CCAATT)5 | 280  | 309  | --         | --        | CATCGGTAACATAGTCTTCA    | GAGAAAAGATGATTGTCGTTG   | 55.28,54.93 | 124 |
| CakTSSR04194 | CakTC41474 | (TGC)6    | 1771 | 1788 | --         | --        | CTTTTCAACCTCATCAACAAC   | ACTATGTGCAGAGACAAATGG   | 54.85,55.34 | 131 |
| CakTSSR04195 | CakTC41474 | (GA)6     | 2168 | 2179 | --         | --        | ACGAAACAAAACAACGAAGTA   | TAAACACGCTCATACACACA    | 55.15,55.35 | 152 |
| CakTSSR04196 | CakTC41482 | (AGA)8    | 267  | 290  | --         | --        | TTGATTCAACACTTGTGTCTCAG | GACAAGCTTTTCTCTTAGGC    | 54.63,55.26 | 154 |
| CakTSSR04197 | CakTC41482 | (TGATTG)5 | 586  | 615  | --         | --        | ACAAAAATCGTTTGAGAATGAG  | CATGTTGTGTTCTGAAATCT    | 54.54,55.13 | 147 |
| CakTSSR04198 | CakTC41501 | (CCA)5    | 185  | 199  | --         | --        | AACCAATTTCTACTTTCCAC    | GAGAAAATGGATGAGATGGA    | 54.92,54.99 | 186 |
| CakTSSR04199 | CakTC41501 | (CCA)6    | 335  | 352  | --         | --        | TCCATCTCATCCATTTTCTC    | GATGATCACAATGACGATGA    | 54.99,55.09 | 172 |
| CakTSSR04200 | CakTC41502 | (AG)7     | 2290 | 2303 | --         | --        |                         |                         |             |     |
| CakTSSR04201 | CakTC41505 | (TA)7     | 267  | 280  | --         | --        | CCAAAGCATCACATTATATT    | CCCAAAGTGTGAGTGTTAAG    | 55.19,54.99 | 145 |
| CakTSSR04202 | CakTC41507 | (TTC)8    | 138  | 161  | --         | --        | TCTTCACCTCTCTTCAACG     | AAATGGAGGACTAGTTGGTTC   | 54.88,54.9  | 159 |
| CakTSSR04203 | CakTC41516 | (TGT)5    | 294  | 308  | Flower bud | GRF       | TGAAGTGGTTTCTGAGTTGTT   | ATTCAACCTCACAGTTTCAGA   | 54.92,54.83 | 151 |
| CakTSSR04204 | CakTC41516 | (AAT)5    | 1328 | 1342 | Flower bud | GRF       |                         |                         |             |     |
| CakTSSR04205 | CakTC41518 | (TCT)9    | 306  | 332  | --         | --        | TATCATCGCCACTCTCTACTT   | TCTTCITTAATTTGGAGTCG    | 54.19,54.01 | 163 |
| CakTSSR04206 | CakTC41521 | (AGA)6    | 1775 | 1792 | --         | GRAS      | AGCACTGAGGTCATATTCAGA   | AAATCTCATCGATCCTTCTTC   | 54.95,55.02 | 145 |
| CakTSSR04207 | CakTC41522 | (TA)6     | 1954 | 1965 | --         | --        | ATTTTCTTCCCTAAAAGCTG    | AGAATTACAGTTTCCCACTC    | 54.7,54.9   | 167 |
| CakTSSR04208 | CakTC41535 | (TGT)5    | 278  | 292  | --         | bHLH      | AATCTTTCTTTCTTCCCAAG    | GTTGTTCTTTCATGTTTTCAG   | 54.49,54.85 | 151 |
| CakTSSR04209 | CakTC41542 | (AAG)6    | 894  | 911  | Young_pod  | --        | GTTTCATTCCTTGAAATTCCTT  | TCATCACCATAACATTCCTC    | 54.97,54.98 | 156 |
| CakTSSR04210 | CakTC41565 | (GAT)6    | 676  | 693  | --         | --        |                         |                         |             |     |
| CakTSSR04211 | CakTC41577 | (CAA)5    | 159  | 173  | --         | SNF2      | TATGATGGAACCAAGAGAGTG   | TTGCAGAATGAGAATGAGAAT   | 55.23,55.02 | 149 |
| CakTSSR04212 | CakTC41591 | (CCG)5    | 713  | 727  | --         | GNAT      |                         |                         |             |     |
| CakTSSR04213 | CakTC41598 | (ACC)5    | 512  | 526  | --         | Trihelix  | ACTATTATGCACCCACTGAAG   | GCAGAGACGAAGAAGATGATA   | 54.45,54.75 | 138 |
| CakTSSR04214 | CakTC41608 | (GAA)5    | 600  | 614  | --         | --        | AAAGAGACAATGAAAGGGGTA   | TAAAAGATGTGCAAGAAGTG    | 55.47,55.96 | 141 |

|              |            |        |      |      |            |      |                        |                       |             |     |
|--------------|------------|--------|------|------|------------|------|------------------------|-----------------------|-------------|-----|
| CakTSSR04215 | CakTC41615 | (TA)6  | 2199 | 2210 | --         | --   | GCTAAGAGAAAAGCTGGAAGT  | GTTTCTGCACAGTTTCTGAC  | 54.87,55.07 | 149 |
| CakTSSR04216 | CakTC41622 | (ATA)5 | 2121 | 2135 | --         | --   | CCTTTTGTTTCTTGTTCGTAA  | CACCATTCTTCATTCTTCAC  | 54.82,54.77 | 152 |
| CakTSSR04217 | CakTC41626 | (ACA)8 | 31   | 54   | --         | --   |                        |                       |             |     |
| CakTSSR04218 | CakTC41628 | (CT)6  | 238  | 249  | --         | --   | AGAGACATAGCATTCCTTCC   | ACGGGTGCTAATAAGAACTTT | 55.14,54.89 | 131 |
| CakTSSR04219 | CakTC41630 | (TTC)7 | 259  | 279  | --         | --   | CACCAACAAAATATGTGGACT  | GGGTGCCTTGAATTAATTATC | 55.02,55.36 | 167 |
| CakTSSR04220 | CakTC41634 | (AC)11 | 115  | 136  | --         | --   | GCAATTCTGTGTTTGCAACTA  | TTCAATATGTTGATCCACCT  | 55.78,54.58 | 149 |
| CakTSSR04221 | CakTC41639 | (TC)7  | 21   | 34   | --         | --   |                        |                       |             |     |
| CakTSSR04222 | CakTC41660 | (TC)6  | 715  | 726  | --         | --   |                        |                       |             |     |
| CakTSSR04223 | CakTC41664 | (TA)6  | 69   | 80   | --         | --   |                        |                       |             |     |
| CakTSSR04224 | CakTC41672 | (CTT)5 | 491  | 505  | --         | --   | CGTAACATCCTCATCTCTCAC  | TGTTGTTCTTGTCTCTCTGGT | 54.78,54.92 | 152 |
| CakTSSR04225 | CakTC41679 | (ATG)5 | 1905 | 1919 | --         | --   | TGACTTGGATAGAGCTGAAAG  | GAGAGTTAAGCCAACTGATCC | 54.85,55.62 | 149 |
| CakTSSR04226 | CakTC41692 | (CAA)6 | 563  | 580  | --         | --   | CTTTCACAAAACACAACAACA  | TCATTGTGTTTTCTCCATTTC | 54.76,55.19 | 170 |
| CakTSSR04227 | CakTC41718 | (AT)7  | 75   | 88   | --         | --   |                        |                       |             |     |
| CakTSSR04228 | CakTC41718 | (GA)6  | 2241 | 2252 | --         | --   |                        |                       |             |     |
| CakTSSR04229 | CakTC41722 | (AAC)5 | 110  | 124  | --         | bZIP | AAGAGCCACAGAGAGTAAACC  | TCTTCATCGCTATCTTCAAAC | 55.29,54.78 | 162 |
| CakTSSR04230 | CakTC41724 | (TC)6  | 101  | 112  | --         | --   | TATCGAAAACTCGAAAAC TTC | ATCTTAGAAAAGCGAGGAGAG | 54,54.8     | 168 |
| CakTSSR04231 | CakTC41741 | (GAA)5 | 19   | 33   | --         | --   |                        |                       |             |     |
| CakTSSR04232 | CakTC41752 | (TCT)5 | 30   | 44   | --         | --   |                        |                       |             |     |
| CakTSSR04233 | CakTC41758 | (TTC)5 | 2315 | 2329 | --         | --   | CATCATAGTGCTTTTTCACT   | CCAACAGTAAC TTGCTTTTC | 54.9,55.14  | 150 |
| CakTSSR04234 | CakTC41759 | (GA)6  | 797  | 808  | --         | --   | AGGGGAAACAGAATGAATATG  | AGATTCTGGTTCTGGATTGTT | 55.67,55.3  | 148 |
| CakTSSR04235 | CakTC41765 | (ATC)5 | 529  | 543  | --         | --   | AACAAC TCATCAACAATGCT  | GGAGGGTGCCTTTATCACTA  | 54.88,55.75 | 152 |
| CakTSSR04236 | CakTC41773 | (CT)8  | 11   | 26   | --         | bHLH |                        |                       |             |     |
| CakTSSR04237 | CakTC41780 | (TTC)6 | 136  | 153  | --         | --   | GTTTTCTTCAATTCCAATTCC  | TTACAAGTGAGACCGTTGTTT | 55.36,54.97 | 150 |
| CakTSSR04238 | CakTC41785 | (AG)6  | 27   | 38   | --         | --   |                        |                       |             |     |
| CakTSSR04239 | CakTC41786 | (AT)8  | 704  | 719  | --         | --   |                        |                       |             |     |
| CakTSSR04240 | CakTC41792 | (GA)12 | 2265 | 2288 | --         | --   | CAGATGAAGAAGCAAGGTTAC  | CAACCCAAACTAAACCTCTCT | 54.28,55.15 | 137 |
| CakTSSR04241 | CakTC41793 | (GA)6  | 588  | 599  | --         | --   | AAAGGCCTTATTGATAGGAAA  | CACACCAGAGATAGTCTCGAA | 54.89,55.47 | 150 |
| CakTSSR04242 | CakTC41797 | (TC)10 | 2294 | 2313 | --         | --   |                        |                       |             |     |
| CakTSSR04243 | CakTC41808 | (AG)12 | 46   | 69   | --         | GRAS |                        |                       |             |     |
| CakTSSR04244 | CakTC41818 | (TAT)5 | 2013 | 2027 | --         | --   | AATTATGGGTTGGTTATTTCC  | CACAGGCAATAAAATGAAAGA | 54.7,55.57  | 163 |
| CakTSSR04245 | CakTC41821 | (CAA)5 | 149  | 163  | --         | --   | GAACACACCTATGTCAAAAGC  | GTAAATGGTGTGTGTTGGAT  | 54.88,54.84 | 129 |
| CakTSSR04246 | CakTC41831 | (ATA)6 | 155  | 172  | Flower bud | --   | TTATGCATCTAGCAGAAGGAA  | TCTGCTAGGACAGTACCAGTT | 55.4,54.2   | 139 |
| CakTSSR04247 | CakTC41840 | (GCT)5 | 1544 | 1558 | --         | --   | TCCAACATTGTACTTCAGGTC  | GGTTGTTCTACTTCTTGCTGA | 55.13,54.76 | 153 |
| CakTSSR04248 | CakTC41844 | (TTC)5 | 41   | 55   | --         | --   |                        |                       |             |     |
| CakTSSR04249 | CakTC41848 | (AT)11 | 569  | 590  | --         | --   | CACATCCACAAAACACAACATA | GTTTGGGTAGCGATTTAATA  | 55.26,55.99 | 174 |
| CakTSSR04250 | CakTC41849 | (GAT)6 | 800  | 817  | --         | --   | CCAAATCCCCTTACTTATTTTC | ACACTATCTCTCCTCGTC    | 54.59,55.04 | 144 |
| CakTSSR04251 | CakTC41861 | (TAG)6 | 186  | 203  | --         | --   | ATAATGAAGCAACTGTTCCAA  | CAACCTCTTTTGTTCATGTT  | 54.99,54.46 | 150 |

|              |            |           |      |      |           |          |                        |                       |             |     |
|--------------|------------|-----------|------|------|-----------|----------|------------------------|-----------------------|-------------|-----|
| CakTSSR04252 | CakTC41883 | (TA)6     | 73   | 84   | --        | --       |                        |                       |             |     |
| CakTSSR04253 | CakTC41888 | (GAAATT)5 | 1788 | 1817 | --        | --       |                        |                       |             |     |
| CakTSSR04254 | CakTC41899 | (TC)25    | 1    | 50   | --        | --       |                        |                       |             |     |
| CakTSSR04255 | CakTC41904 | (TTC)8    | 42   | 65   | --        | --       |                        |                       |             |     |
| CakTSSR04256 | CakTC41904 | (CCA)6    | 218  | 235  | --        | --       | AACACTATCCTCAACCTCTCC  | ATTCGTGGAAGAATTGTTGA  | 54.88,55.64 | 148 |
| CakTSSR04257 | CakTC41906 | (CT)7     | 59   | 72   | Root      | --       |                        |                       |             |     |
| CakTSSR04258 | CakTC41915 | (CTT)5    | 220  | 234  | --        | --       | CGCTTCATTAACCTCAACAAC  | AAGAAGACATAGCTCGAGGAC | 55.23,55.37 | 154 |
| CakTSSR04259 | CakTC41915 | (TCT)5    | 336  | 350  | --        | --       | CAAATTCCTCAGTTCTGCAC   | GGTGTTTTGATGGTTCTTC   | 55.18,56.19 | 163 |
| CakTSSR04260 | CakTC41928 | (TC)6     | 5    | 16   | --        | --       |                        |                       |             |     |
| CakTSSR04261 | CakTC41928 | (CCA)6    | 290  | 307  | --        | --       | CACCTGTAAATTCATCAAT    | TCTTGAATGGAGAGACTAACG | 54.2,54.69  | 147 |
| CakTSSR04262 | CakTC41929 | (AAC)5    | 148  | 162  | --        | --       | ATCACCAATTACCGATCAAG   | ACTGCTTCTGATGTTGATGTT | 55,54.85    | 153 |
| CakTSSR04263 | CakTC41933 | (TA)6     | 1121 | 1132 | --        | --       |                        |                       |             |     |
| CakTSSR04264 | CakTC41944 | (ATC)7    | 476  | 496  | --        | C2C2-Dof | ACCAACCTTACAAGTCTCTTC  | GTTATGCATCTCATGGTGAAC | 54.96,55.51 | 142 |
| CakTSSR04265 | CakTC41944 | (TAA)17   | 627  | 677  | --        | C2C2-Dof | CAAACCTCCTTCAGCTCTTG   | GGGAATCCATTAGGATAAAGA | 55.43,54.87 | 163 |
| CakTSSR04266 | CakTC41945 | (AG)6     | 1224 | 1235 | --        | C2C2-Dof |                        |                       |             |     |
| CakTSSR04267 | CakTC41946 | (TCT)5    | 122  | 136  | --        | --       | AAAGAGGTCACAACACAACAC  | GAGTGAACAAAGCATACGAAG | 55.1,55.22  | 144 |
| CakTSSR04268 | CakTC41955 | (CT)16    | 9    | 40   | --        | --       |                        |                       |             |     |
| CakTSSR04269 | CakTC41959 | (TTC)5    | 151  | 165  | --        | --       | AGTGAGAAAATGCAAGCTCTA  | GGAAGAAAAGGTTGTGAGTTT | 54.61,55.11 | 140 |
| CakTSSR04270 | CakTC41973 | (AAG)11   | 1054 | 1086 | --        | --       |                        |                       |             |     |
| CakTSSR04271 | CakTC41982 | (TTC)5    | 1574 | 1588 | --        | --       | GTGTACGAAGGTAGGTTGAAG  | GTGTAACATTACCGTTTAGC  | 54.08,54.93 | 149 |
| CakTSSR04272 | CakTC41987 | (AATGAT)6 | 755  | 790  | --        | NAC      | TGGAGGTTCAAGTAGCACTAA  | CCCAACAAGATATTGGGTTA  | 55.23,55.04 | 150 |
| CakTSSR04273 | CakTC41998 | (AG)6     | 187  | 198  | --        | MADS     | ATGGTTTTGTCTCACATTCTTA | TCTCAATTCTCTCAATTCCA  | 54.99,54.99 | 150 |
| CakTSSR04274 | CakTC42019 | (CT)8     | 1828 | 1843 | --        | TUB      | TGCTAACATCTTCAGTTCCTC  | TGCAGAGAAAGAGTGAGAAAG | 54.67,55.05 | 150 |
| CakTSSR04275 | CakTC42020 | (GTG)6    | 783  | 800  | --        | --       | GTTAGAGGTTGTTGGTGTTTG  | AAAGAACCACAAAAATGG    | 54.81,55.14 | 147 |
| CakTSSR04276 | CakTC42021 | (TA)7     | 275  | 288  | --        | --       | CCAAACCTCTTCATTAACACA  | CTTTATTCAACGCCATTCTTA | 55.32,54.88 | 146 |
| CakTSSR04277 | CakTC42026 | (CT)15    | 850  | 879  | --        | --       | ACAACACCTTCAGTAGTTGGA  | GTTGGGTAATTTGAGAGAGTG | 54.78,53.95 | 147 |
| CakTSSR04278 | CakTC42030 | (AAG)5    | 514  | 528  | --        | --       | GGGAAAAGGTTGAGGTTAATA  | TCCTCTCTCTCTCTCGTTCT  | 55.03,55.06 | 154 |
| CakTSSR04279 | CakTC42038 | (CT)9     | 933  | 950  | --        | --       |                        |                       |             |     |
| CakTSSR04280 | CakTC42042 | (TTTA)5   | 1943 | 1962 | --        | --       |                        |                       |             |     |
| CakTSSR04281 | CakTC42043 | (AC)7     | 53   | 66   | Young_pod | --       |                        |                       |             |     |
| CakTSSR04282 | CakTC42052 | (GA)7     | 1080 | 1093 | --        | --       |                        |                       |             |     |
| CakTSSR04283 | CakTC42061 | (TCT)5    | 311  | 325  | --        | --       | GTTCTATACGCCAACTCAAGA  | CTGGGTGATCTACGATCAATA | 54.74,55.19 | 136 |
| CakTSSR04284 | CakTC42067 | (CAT)6    | 335  | 352  | --        | --       | TTCATTTTCTCAAAACCTCAC  | AATGCATTGACTAATGATGGT | 54.5,54.6   | 147 |
| CakTSSR04285 | CakTC42068 | (TA)8     | 207  | 222  | --        | --       | CTAAAAAGCCTCCAAAATACA  | CCCTCTTCATATGTGAGCTT  | 54.1,56.06  | 150 |
| CakTSSR04286 | CakTC42090 | (TTG)5    | 846  | 860  | --        | --       | TGGTGATATCTTCATTGGTTC  | AAAAAGGAAAGAGTTCAAGA  | 54.98,54.94 | 144 |
| CakTSSR04287 | CakTC42100 | (CTT)6    | 1319 | 1336 | --        | --       | ACCTAAGACATCCCATCTTTC  | GACAACCATGATGAAGAAGAC | 54.82,54.55 | 150 |
| CakTSSR04288 | CakTC42101 | (GAA)6    | 101  | 118  | --        | --       | AGAGAGAGATTGGTGGAAC    | GAATCAGAATCAACATTTCG  | 55.01,54.87 | 159 |

|              |            |         |      |      |       |           |                        |                        |             |     |
|--------------|------------|---------|------|------|-------|-----------|------------------------|------------------------|-------------|-----|
| CakTSSR04289 | CakTC42106 | (TA)6   | 1074 | 1085 | Shoot | --        |                        |                        |             |     |
| CakTSSR04290 | CakTC42107 | (TTA)8  | 893  | 916  | --    | --        |                        |                        |             |     |
| CakTSSR04291 | CakTC42112 | (TGT)6  | 843  | 860  | --    | --        | GAGTGTGAGTGTTCCTTTTGTG | CATCTGCTTCTTCCATAATTG  | 54.92,55.08 | 157 |
| CakTSSR04292 | CakTC42118 | (AG)13  | 966  | 991  | --    | --        |                        |                        |             |     |
| CakTSSR04293 | CakTC42122 | (GA)24  | 2680 | 2727 | --    | --        | CAGGATTTTGTGATAATTGGA  | CAGGGTACTGTTTGTGTGTGT  | 55.17,55.17 | 151 |
| CakTSSR04294 | CakTC42129 | (AT)9   | 24   | 41   | --    | --        |                        |                        |             |     |
| CakTSSR04295 | CakTC42131 | (TTGA)5 | 59   | 78   | --    | --        |                        |                        |             |     |
| CakTSSR04296 | CakTC42146 | (AAG)6  | 402  | 419  | --    | --        | CAAAATCGAAGTTTCAGAGAA  | CTTTCTCTTCTTCTTCGTC    | 54.84,55.07 | 144 |
| CakTSSR04297 | CakTC42153 | (CGA)5  | 830  | 844  | --    | --        | ATCAACCTCCAACACTCATAA  | ATGAGTTTCCAAGGAAAAGTT  | 54.64,54.65 | 144 |
| CakTSSR04298 | CakTC42155 | (TC)10  | 121  | 140  | --    | --        | TATCACTCCCTTACAAACG    | TTTGACCAGAAGAAGAACTCA  | 54.59,55.14 | 156 |
| CakTSSR04299 | CakTC42159 | (GA)12  | 1035 | 1058 | --    | --        | TCAATACTCTCTCCAAATTCCT | CATTGAATTTGATAGGCAAAG  | 54.75,55.1  | 152 |
| CakTSSR04300 | CakTC42170 | (CT)10  | 1808 | 1827 | --    | --        |                        |                        |             |     |
| CakTSSR04301 | CakTC42177 | (CAT)7  | 384  | 404  | --    | --        | TTTGTGATCTGGGTATATGCT  | CCTTGTTTGTGAGGTGATAA   | 54.78,55.32 | 153 |
| CakTSSR04302 | CakTC42185 | (CAA)5  | 107  | 121  | --    | --        | AACTCCAAAAGTGAACAACA   | TGAGAACAAGAGGTCGTAGAG  | 54.94,54.75 | 159 |
| CakTSSR04303 | CakTC42190 | (TTCA)5 | 1768 | 1787 | --    | --        |                        |                        |             |     |
| CakTSSR04304 | CakTC42191 | (TTC)6  | 762  | 779  | --    | --        | AGAAGGAGTTGGTATCCAAAA  | ACATTGGATTGCCTAACACTA  | 55.47,54.86 | 149 |
| CakTSSR04305 | CakTC42197 | (TC)7   | 172  | 185  | --    | --        | TCAATTTCCATGTGACTAACC  | GAGGGAAGTATATGTCAAAAGC | 55.06,54.79 | 152 |
| CakTSSR04306 | CakTC42200 | (GA)13  | 1574 | 1599 | --    | bHLH      | TGCTTTGTAGTGAGTGTGTGT  | GTAACCCAGTTGAGAAGTTT   | 54.29,54.98 | 149 |
| CakTSSR04307 | CakTC42202 | (CT)7   | 874  | 887  | --    | --        |                        |                        |             |     |
| CakTSSR04308 | CakTC42207 | (GTC)5  | 125  | 139  | --    | --        | ATCGAATAACGGATAATTGGT  | CTTTGCTACTCTCAGCCATT   | 55.24,54.87 | 153 |
| CakTSSR04309 | CakTC42207 | (ATA)5  | 252  | 266  | --    | --        | GAACACCCCTTTCTTCATTAG  | TTAACCTTCCCTAAAAGTTGG  | 55.47,55.26 | 142 |
| CakTSSR04310 | CakTC42207 | (TGA)11 | 604  | 636  | --    | --        | ACGGTAGGGAAATAGAATCAG  | GCGTCATCTCTACCAGAACTA  | 55.04,54.71 | 151 |
| CakTSSR04311 | CakTC42222 | (TC)7   | 147  | 160  | --    | --        | ACTTTCATCACCACTGTTC    | CGCTTTGTGTTGTATTATGT   | 55.02,55.39 | 164 |
| CakTSSR04312 | CakTC42223 | (AG)15  | 1835 | 1864 | --    | --        |                        |                        |             |     |
| CakTSSR04313 | CakTC42233 | (GA)10  | 5    | 24   | --    | --        |                        |                        |             |     |
| CakTSSR04314 | CakTC42237 | (AG)8   | 1693 | 1708 | --    | --        |                        |                        |             |     |
| CakTSSR04315 | CakTC42242 | (ATA)7  | 114  | 134  | --    | --        | TCAAGTTGAAAATGGGAAAT   | ACTTCAGTGGTCTTAGGGAAG  | 54.7,55.14  | 155 |
| CakTSSR04316 | CakTC42242 | (TCA)5  | 931  | 945  | --    | --        | AGCTTTTAACACACCAAGTGA  | AATGGAAAAGTGATGATGATG  | 55.14,54.98 | 149 |
| CakTSSR04317 | CakTC42254 | (CT)6   | 63   | 74   | --    | --        |                        |                        |             |     |
| CakTSSR04318 | CakTC42257 | (TCA)6  | 135  | 152  | --    | --        | GCCATAAACTAAAATCCTGCT  | AGGAGGTAAAAGTGAGAAACG  | 55.35,55.31 | 151 |
| CakTSSR04319 | CakTC42262 | (GA)7   | 2423 | 2436 | --    | --        |                        |                        |             |     |
| CakTSSR04320 | CakTC42269 | (AAAG)5 | 1255 | 1274 | --    | --        |                        |                        |             |     |
| CakTSSR04321 | CakTC42272 | (AT)6   | 804  | 815  | --    | --        |                        |                        |             |     |
| CakTSSR04322 | CakTC42276 | (CAA)5  | 740  | 754  | Shoot | AP2-EREBP | CAACAAAGTGGTTGTGTTTCT  | CTACTAGCTTGGTGGATGATG  | 55.3,55.02  | 159 |
| CakTSSR04323 | CakTC42278 | (AG)8   | 32   | 47   | --    | --        |                        |                        |             |     |
| CakTSSR04324 | CakTC42296 | (TTC)6  | 1594 | 1611 | --    | --        | AATGGCATTATGTTCTGTGTAG | TGATGAGATTGAAATTGAGGA  | 55.31,55.71 | 142 |
| CakTSSR04325 | CakTC42300 | (GAT)6  | 1833 | 1850 | --    | --        | AGTCAACGAGTTGATTATGGA  | CAAAATCAAATTCGTCTCAAC  | 54.8,54.96  | 149 |

|              |            |           |      |      |            |         |                       |                       |             |     |
|--------------|------------|-----------|------|------|------------|---------|-----------------------|-----------------------|-------------|-----|
| CakTSSR04326 | CakTC42306 | (AAG)12   | 208  | 243  | --         | --      | GTCCTTAGAAACAAGGGCAAT | CCACTTCTTGATTGAAGTTGA | 55.23,55.44 | 156 |
| CakTSSR04327 | CakTC42316 | (GT)9     | 43   | 60   | --         | --      |                       |                       |             |     |
| CakTSSR04328 | CakTC42320 | (AG)7     | 30   | 43   | --         | --      |                       |                       |             |     |
| CakTSSR04329 | CakTC42321 | (AAG)7    | 846  | 866  | Root       | --      |                       |                       |             |     |
| CakTSSR04330 | CakTC42322 | (AAC)5    | 432  | 446  | --         | --      | ACTCAAAATCACACCTTTCA  | ACACCAACAACATTAACAACC | 54.85,54.93 | 145 |
| CakTSSR04331 | CakTC42322 | (TGG)7    | 804  | 824  | --         | --      | GGAAAAATGGTTACTGTTCT  | CTCTGCAGGTGACATAGAAC  | 54.92,55.04 | 157 |
| CakTSSR04332 | CakTC42332 | (AG)6     | 2093 | 2104 | --         | --      |                       |                       |             |     |
| CakTSSR04333 | CakTC42336 | (GA)11    | 995  | 1016 | --         | --      |                       |                       |             |     |
| CakTSSR04334 | CakTC42338 | (CGA)9    | 454  | 480  | --         | --      | TGATGATGAAGAGGAAGAAGA | AAGGTACTCTGTCCCAAAT   | 54.97,55.16 | 145 |
| CakTSSR04335 | CakTC42346 | (TAA)7    | 455  | 475  | --         | bHLH    | TGAGATAATGGAGCTTGAATC | AGCTTGTTGAAGTGACACAGT | 54.53,55.01 | 152 |
| CakTSSR04336 | CakTC42350 | (GTG)5    | 288  | 302  | --         | --      | TATTATGCTCACCTTTGATGG | TGGTGTCTATTGTTTCATT   | 55.36,55.4  | 135 |
| CakTSSR04337 | CakTC42356 | (GAT)5    | 142  | 156  | --         | --      | ATCATGATGAGCCTGTAGTTG | ATTGCCTTACGACTCTTCTTT | 55.25,54.99 | 157 |
| CakTSSR04338 | CakTC42362 | (TCATCT)5 | 316  | 345  | --         | --      | GAGCAAGATTTCCTCAACATT | GGTGGTTGAAGTTGAACATG  | 56.02,54.72 | 150 |
| CakTSSR04339 | CakTC42362 | (CT)8     | 1682 | 1697 | --         | --      | ACAGGATATGCATTGTTTTTG | CCGTGAAACTTTTCCATTACT | 55.27,55.97 | 142 |
| CakTSSR04340 | CakTC42363 | (AG)10    | 80   | 99   | --         | bZIP    |                       |                       |             |     |
| CakTSSR04341 | CakTC42366 | (GTT)6    | 1545 | 1562 | --         | --      | GAGAGAGTTTGGTGATGGTTA | ACCAACCCTAACAACAGAATC | 54.34,55.66 | 134 |
| CakTSSR04342 | CakTC42388 | (TC)10    | 95   | 114  | --         | --      |                       |                       |             |     |
| CakTSSR04343 | CakTC42390 | (TCC)6    | 774  | 791  | --         | --      | AGGGAAACAGCTTGTAAGTTT | AGATTAGGTTAGGGGTTTGA  | 54.92,54.64 | 139 |
| CakTSSR04344 | CakTC42401 | (GAA)5    | 85   | 99   | --         | --      |                       |                       |             |     |
| CakTSSR04345 | CakTC42409 | (ACTCGG)5 | 1803 | 1832 | --         | --      |                       |                       |             |     |
| CakTSSR04346 | CakTC42424 | (GAT)5    | 743  | 757  | --         | --      | TCCAATCTTGCTTTCTTATCA | TCTTTTCTAGCTCCTCAACA  | 55.21,54.59 | 148 |
| CakTSSR04347 | CakTC42430 | (ATA)5    | 95   | 109  | --         | --      |                       |                       |             |     |
| CakTSSR04348 | CakTC42437 | (GA)8     | 1    | 16   | --         | --      |                       |                       |             |     |
| CakTSSR04349 | CakTC42447 | (AT)10    | 434  | 453  | --         | --      |                       |                       |             |     |
| CakTSSR04350 | CakTC42461 | (CAA)6    | 437  | 454  | --         | --      | ACAAACAACAACAACAATCC  | TGTTTCTGCTTCTCTCTG    | 55.05,55.07 | 176 |
| CakTSSR04351 | CakTC42462 | (AAAC)6   | 76   | 99   | --         | --      |                       |                       |             |     |
| CakTSSR04352 | CakTC42466 | (CT)8     | 21   | 36   | --         | --      |                       |                       |             |     |
| CakTSSR04353 | CakTC42467 | (CTT)6    | 5    | 22   | Flower bud | G2-like |                       |                       |             |     |
| CakTSSR04354 | CakTC42467 | (ATA)5    | 453  | 467  | Flower bud | G2-like | GATGATGATTCTCTTCAACCA | GTCGACACAGAATTAGGAAGA | 55.09,54.5  | 155 |
| CakTSSR04355 | CakTC42468 | (AG)6     | 108  | 119  | --         | --      | CGTTTTACTTTTCGAGTTCAA | AGAGAAGAAAGCGAAGAGTTG | 54.98,55.74 | 153 |
| CakTSSR04356 | CakTC42471 | (TTTT)6   | 1041 | 1070 | Flower bud | NAC     |                       |                       |             |     |
| CakTSSR04357 | CakTC42474 | (TTC)6    | 293  | 310  | --         | --      | TTAGGTCCTCTCTATTGG    | CACAATCTCCAAATGAAATGT | 55.16,55.06 | 163 |
| CakTSSR04358 | CakTC42483 | (TATT)5   | 199  | 218  | --         | --      | AATCGAACAGAAACATACAG  | CATCACAAGGAATCATGGTA  | 55.34,55.95 | 152 |
| CakTSSR04359 | CakTC42484 | (TC)12    | 4    | 27   | --         | --      |                       |                       |             |     |
| CakTSSR04360 | CakTC42489 | (GA)15    | 1    | 30   | Shoot      | --      |                       |                       |             |     |
| CakTSSR04361 | CakTC42495 | (AAC)6    | 48   | 65   | --         | --      |                       |                       |             |     |
| CakTSSR04362 | CakTC42503 | (ATA)5    | 64   | 78   | --         | --      |                       |                       |             |     |

|              |            |          |      |      |             |              |                        |                        |             |     |
|--------------|------------|----------|------|------|-------------|--------------|------------------------|------------------------|-------------|-----|
| CakTSSR04363 | CakTC42510 | (GA)11   | 1    | 22   | --          | --           |                        |                        |             |     |
| CakTSSR04364 | CakTC42513 | (ACT)5   | 770  | 784  | --          | --           | GGTCAACTGATATCACCAAGA  | CGTAAGTCGAGAGTTATCCA   | 55.05,54.75 | 160 |
| CakTSSR04365 | CakTC42513 | (CAA)5   | 1131 | 1145 | --          | --           | AAAACAAGCCAACAGTATCAA  | GTGCGTCAATTAGAGTTTCTG  | 55.07,55.22 | 147 |
| CakTSSR04366 | CakTC42517 | (TTC)6   | 823  | 840  | --          | --           |                        |                        |             |     |
| CakTSSR04367 | CakTC42518 | (AG)10   | 2016 | 2035 | Mature Leaf | --           |                        |                        |             |     |
| CakTSSR04368 | CakTC42521 | (TC)6    | 33   | 44   | --          | MYB          |                        |                        |             |     |
| CakTSSR04369 | CakTC42521 | (ATC)6   | 695  | 712  | --          | MYB          | CAATTCCTTCATCAACAACAC  | GGACATCTTTCTGAAACTGAA  | 55.56,54.47 | 154 |
| CakTSSR04370 | CakTC42546 | (AG)6    | 35   | 46   | --          | --           |                        |                        |             |     |
| CakTSSR04371 | CakTC42558 | (TTG)5   | 513  | 527  | --          | C2H2         | ATGATGGTGTGATCATTCTC   | AAAAAGCTGCTCAAAATAGGTT | 54.77,55.16 | 146 |
| CakTSSR04372 | CakTC42558 | (GTT)5   | 846  | 860  | --          | C2H2         | AAAAGGTGAAAGTGATGATGA  | AACTTTCCAAGACCTTCAATC  | 54.77,55.03 | 151 |
| CakTSSR04373 | CakTC42567 | (ATTCA)5 | 67   | 91   | --          | --           |                        |                        |             |     |
| CakTSSR04374 | CakTC42573 | (TC)11   | 37   | 58   | --          | --           |                        |                        |             |     |
| CakTSSR04375 | CakTC42575 | (AG)8    | 1969 | 1984 | --          | --           |                        |                        |             |     |
| CakTSSR04376 | CakTC42589 | (GAA)6   | 1634 | 1651 | --          | --           |                        |                        |             |     |
| CakTSSR04377 | CakTC42594 | (CAA)5   | 1382 | 1396 | --          | --           | GTTCTATAATGGATGGGAAGG  | GACCGATGAATGATACTGATG  | 55.21,55.43 | 148 |
| CakTSSR04378 | CakTC42597 | (CTC)6   | 151  | 168  | --          | --           | CTACAACCTTTGTCCACAACC  | ACGCCCACTACTGGATTAC    | 54.81,55.08 | 148 |
| CakTSSR04379 | CakTC42599 | (AC)7    | 167  | 180  | --          | --           | GCTCCAAAATTATGAAGGTGT  | TTCCATATTTTAAGGTCAGCA  | 55.89,55.1  | 144 |
| CakTSSR04380 | CakTC42602 | (CT)6    | 97   | 108  | --          | --           |                        |                        |             |     |
| CakTSSR04381 | CakTC42608 | (AG)7    | 866  | 879  | --          | NAC          |                        |                        |             |     |
| CakTSSR04382 | CakTC42611 | (ATT)6   | 488  | 505  | --          | --           | TTCATAATCCACATTGTAGCA  | ATGTTGCAATTATTCCCTTCT  | 54.24,55.43 | 149 |
| CakTSSR04383 | CakTC42613 | (CAG)7   | 127  | 147  | --          | --           | AATCAAAATCGGTGTTACTCA  | CTTCTTGTTTCAGCTCTTTCA  | 54.83,55.07 | 148 |
| CakTSSR04384 | CakTC42616 | (ATA)6   | 1424 | 1441 | --          | --           |                        |                        |             |     |
| CakTSSR04385 | CakTC42619 | (AGC)5   | 414  | 428  | --          | --           | CTTCGACAAATTAATGGATA   | CTCTTTTGCTGTTGTTATTGC  | 55.33,55.39 | 139 |
| CakTSSR04386 | CakTC42630 | (TA)11   | 80   | 101  | --          | --           |                        |                        |             |     |
| CakTSSR04387 | CakTC42636 | (AT)7    | 80   | 93   | --          | --           |                        |                        |             |     |
| CakTSSR04388 | CakTC42644 | (AG)6    | 205  | 216  | --          | --           | ACCAATTGGAGTAGAAATTGT  | GGTAAATAGCTGGTTGGATTC  | 52.95,55.43 | 139 |
| CakTSSR04389 | CakTC42648 | (AG)6    | 113  | 124  | --          | --           | TCAATCAGCTTTTACTCTCTCA | AAACACTTCCTCCATTCTTC   | 54.6,55.03  | 154 |
| CakTSSR04390 | CakTC42655 | (CT)15   | 2    | 31   | --          | Sigma70-like |                        |                        |             |     |
| CakTSSR04391 | CakTC42656 | (TGA)6   | 794  | 811  | --          | --           | GCATCTCTAAACCAATTCTT   | TGTGCAAGAAGTTAACGAGAT  | 55.15,55.22 | 150 |
| CakTSSR04392 | CakTC42660 | (GA)8    | 120  | 135  | --          | --           | TTATTCTCTGAGACACATGC   | TACCAAGAAGGCTTGTATGA   | 55.38,55.16 | 150 |
| CakTSSR04393 | CakTC42667 | (CAC)6   | 178  | 195  | --          | Trihelix     | AATCCTCCGTGACGATAAC    | GATTTCGGTAATCATCGGTAT  | 54.96,55.62 | 143 |
| CakTSSR04394 | CakTC42668 | (AT)6    | 5    | 16   | --          | --           |                        |                        |             |     |
| CakTSSR04395 | CakTC42668 | (TTG)5   | 1748 | 1762 | --          | --           | TCTTCTTGTTCTTGAGTTCCA  | TCTCACTCTCACAGACACACA  | 55.14,55.13 | 148 |
| CakTSSR04396 | CakTC42674 | (TC)7    | 182  | 195  | --          | --           | CCACCCACTTGTAGAAAGAA   | CCACAACCTCCATATTATCAG  | 55.3,54.63  | 168 |
| CakTSSR04397 | CakTC42675 | (AAG)9   | 52   | 78   | --          | --           |                        |                        |             |     |
| CakTSSR04398 | CakTC42680 | (TAT)9   | 347  | 373  | Flower bud  | AP2-EREBP    | AGAAGATTCTCCACCAAAATC  | GGGAATTCAAATTGAGAAAAC  | 54.95,55.36 | 146 |
| CakTSSR04399 | CakTC42684 | (AGTG)6  | 280  | 303  | --          | --           | AAAATTAACCATGGAGTCG    | TGAATATGTGGATGAAGAACC  | 55.89,54.98 | 163 |

|              |            |         |      |      |       |           |                       |                         |             |     |
|--------------|------------|---------|------|------|-------|-----------|-----------------------|-------------------------|-------------|-----|
| CakTSSR04400 | CakTC42688 | (AAG)6  | 232  | 249  | --    | --        | TCACCATTGGATCTTAAACAC | TTGGGGTTGAGTTGATTACTA   | 55.06,54.84 | 148 |
| CakTSSR04401 | CakTC42689 | (TTG)7  | 691  | 711  | --    | --        | ATATTCAACCAGTAGGCCTGT | TGATTAGTGTAGTGACAATTCCA | 55.37,54.95 | 147 |
| CakTSSR04402 | CakTC42693 | (GAA)5  | 1725 | 1739 | --    | --        | CAGTAACCTCTTGGGTGTAAA | ATATATTGAATGGCACAACC    | 54.51,54.18 | 154 |
| CakTSSR04403 | CakTC42693 | (TTC)5  | 1888 | 1902 | --    | --        |                       |                         |             |     |
| CakTSSR04404 | CakTC42701 | (TCT)7  | 856  | 876  | --    | --        |                       |                         |             |     |
| CakTSSR04405 | CakTC42710 | (CT)11  | 6    | 27   | --    | --        |                       |                         |             |     |
| CakTSSR04406 | CakTC42718 | (GAT)6  | 197  | 214  | --    | --        | TCCAACAAAAGCTGAATCTTA | CAGGATGAAGAGGGTTAATCT   | 55.29,54.99 | 147 |
| CakTSSR04407 | CakTC42722 | (AG)6   | 14   | 25   | --    | --        |                       |                         |             |     |
| CakTSSR04408 | CakTC42729 | (AAG)5  | 225  | 239  | --    | --        | TAGGCCATCAAAGATATCAAA | AGTGAGITCCGATGTATTCAA   | 55.02,54.8  | 149 |
| CakTSSR04409 | CakTC42743 | (TA)6   | 933  | 944  | --    | --        |                       |                         |             |     |
| CakTSSR04410 | CakTC42745 | (TAT)5  | 140  | 154  | --    | --        | ATAAACAAATGAACTGGCTTG | TCACATTAAGTTGATGTCCT    | 54.61,54.97 | 147 |
| CakTSSR04411 | CakTC42746 | (ACA)5  | 421  | 435  | --    | --        | GGAGCTCATAAACAGTTCCTC | TCTTGGCTATTGATCGTAAAA   | 55.62,55.25 | 150 |
| CakTSSR04412 | CakTC42754 | (TC)7   | 876  | 889  | --    | --        |                       |                         |             |     |
| CakTSSR04413 | CakTC42755 | (TTG)9  | 924  | 950  | --    | C2H2      | TGTCATGTTCTTCATCAATCA | AAGGAGATGGAGAAAGAGAAG   | 54.91,54.42 | 144 |
| CakTSSR04414 | CakTC42763 | (TCA)5  | 118  | 132  | Shoot | --        | TATTTTCCACAAACAACACC  | TCTCTTCTTGACTTGGTGAA    | 55.16,55.14 | 157 |
| CakTSSR04415 | CakTC42765 | (TAA)5  | 1829 | 1843 | --    | --        |                       |                         |             |     |
| CakTSSR04416 | CakTC42766 | (AG)8   | 798  | 813  | --    | --        | CTAGGTACCAGTGTITGGTTG | TCTCTGTACTCATTTCACAACA  | 54.86,55.04 | 156 |
| CakTSSR04417 | CakTC42772 | (AT)6   | 1627 | 1638 | --    | bZIP      | CGAGATCAGACCATCATTACT | AGTGACATTGTTTGTAAGCAG   | 54.28,54.76 | 157 |
| CakTSSR04418 | CakTC42784 | (CTA)5  | 779  | 793  | --    | C2C2-GATA | AAGAAGAAGCCTCTTGTGAAT | CCTTCAAAATCTGAATTTTCC   | 54.94,55.52 | 161 |
| CakTSSR04419 | CakTC42788 | (TGA)5  | 793  | 807  | --    | --        | ACAGTGAGGTAGCAAGCATAA | CGCAACAATACGATAAACATC   | 55.25,55.87 | 149 |
| CakTSSR04420 | CakTC42795 | (ATC)8  | 139  | 162  | --    | --        | TTCATCACCATAAACTCACA  | GTGAAGACAGGTGTCGAAGTA   | 54.86,55.37 | 142 |
| CakTSSR04421 | CakTC42806 | (AG)16  | 1917 | 1948 | --    | --        |                       |                         |             |     |
| CakTSSR04422 | CakTC42809 | (AT)8   | 2401 | 2416 | --    | --        |                       |                         |             |     |
| CakTSSR04423 | CakTC42811 | (AG)6   | 1970 | 1981 | --    | --        |                       |                         |             |     |
| CakTSSR04424 | CakTC42819 | (TTAT)5 | 250  | 269  | --    | --        | AAATTGATTGGAATGCCTAGT | GATTTGAGGATTTGAGTTTTT   | 55.58,54.97 | 218 |
| CakTSSR04425 | CakTC42823 | (ATA)6  | 132  | 149  | --    | --        | CTTAAGCCAACAACCTCACTA | TTGGAAGGAAGGTTTAGAAT    | 54.84,54.76 | 150 |
| CakTSSR04426 | CakTC42829 | (AT)9   | 69   | 86   | --    | --        |                       |                         |             |     |
| CakTSSR04427 | CakTC42832 | (GAA)5  | 740  | 754  | --    | --        | AGATGCAGAAGAAGATCAACA | GTGGTGAGTGCAACTTCTTAG   | 55.08,55.12 | 143 |
| CakTSSR04428 | CakTC42840 | (GTG)5  | 498  | 512  | --    | --        | CCAATCATAGCTAATCTTCCA | CTGTAAACCCAGTTACACCAG   | 54.61,54.86 | 151 |
| CakTSSR04429 | CakTC42840 | (ACC)5  | 1051 | 1065 | --    | --        | CTGTAAACCCAGTTACACCAG | CCAATCATAGCTAATCTTCCA   | 54.86,54.61 | 151 |
| CakTSSR04430 | CakTC42844 | (TAA)7  | 574  | 594  | Shoot | --        | AAATTCCAGAATTACGAGGAG | CTGTGAGAGTACCTTTTGGTG   | 55.16,54.97 | 167 |
| CakTSSR04431 | CakTC42848 | (AG)6   | 1921 | 1932 | --    | --        |                       |                         |             |     |
| CakTSSR04432 | CakTC42853 | (TTTC)7 | 1913 | 1940 | --    | --        |                       |                         |             |     |
| CakTSSR04433 | CakTC42854 | (CT)6   | 27   | 38   | --    | CCAAT     |                       |                         |             |     |
| CakTSSR04434 | CakTC42855 | (GTG)5  | 506  | 520  | --    | --        | GAGAAACATTCGTGTGTCCTA | AAATTGAAAGATCGCATCAC    | 55.3,55.29  | 146 |
| CakTSSR04435 | CakTC42865 | (ATG)6  | 637  | 654  | --    | --        | CAGGTCCAAGTGTAGCAGTAG | TCCACTCCTTTGTGCTAGTAA   | 55.17,55.23 | 148 |
| CakTSSR04436 | CakTC42868 | (GTG)7  | 12   | 32   | --    | --        |                       |                         |             |     |

|              |            |           |      |      |             |           |                        |                       |             |     |
|--------------|------------|-----------|------|------|-------------|-----------|------------------------|-----------------------|-------------|-----|
| CakTSSR04437 | CakTC42882 | (CTC)6    | 71   | 88   | --          | --        |                        |                       |             |     |
| CakTSSR04438 | CakTC42894 | (TAT)5    | 269  | 283  | --          | --        | ATAAAAAGCCACCTCACTCTC  | CGATCTCAAAAATAACACCAT | 55.22,54.36 | 161 |
| CakTSSR04439 | CakTC42906 | (TCC)5    | 125  | 139  | --          | --        | AACTCGCCTCTCTATTCTT    | GCGGATAGGTCTTGTTTATAG | 55.77,54.26 | 150 |
| CakTSSR04440 | CakTC42914 | (TCA)5    | 36   | 50   | --          | --        |                        |                       |             |     |
| CakTSSR04441 | CakTC42922 | (AAC)5    | 159  | 173  | Flower bud  | --        | TCATGAGGAGAGAGAAAAACA  | TTCATGAGAGGAATGAACAAC | 55.06,55.18 | 160 |
| CakTSSR04442 | CakTC42925 | (GA)8     | 869  | 884  | --          | --        |                        |                       |             |     |
| CakTSSR04443 | CakTC42941 | (TAA)7    | 187  | 207  | --          | --        | AGCTCCAAAACACATAATCAA  | TTCTTTGGCCTTTTCTAAGT  | 54.99,55.14 | 151 |
| CakTSSR04444 | CakTC42942 | (CT)7     | 25   | 38   | --          | --        |                        |                       |             |     |
| CakTSSR04445 | CakTC42950 | (TAA)5    | 1596 | 1610 | --          | C2H2      | TCAAAGCAATAGTGTGGAGT   | CCTCCTCCTCCATAGAAATTA | 55.05,55.1  | 153 |
| CakTSSR04446 | CakTC42971 | (CTT)6    | 117  | 134  | --          | AP2-EREBP | TCCAATACTCCACAACACTAAA | TGTTTCCCTAAACTTCTTCCT | 54.94,54.82 | 147 |
| CakTSSR04447 | CakTC42979 | (AG)9     | 46   | 63   | --          | --        |                        |                       |             |     |
| CakTSSR04448 | CakTC42980 | (TCT)5    | 692  | 706  | --          | --        | CAGTTCTGGTAAGACCTCAA   | AAAACAACGGAAGTGACATAA | 54.61,54.91 | 163 |
| CakTSSR04449 | CakTC42985 | (TGA)11   | 1878 | 1910 | --          | --        |                        |                       |             |     |
| CakTSSR04450 | CakTC42998 | (TCT)6    | 176  | 193  | --          | --        | CCTTACGGAGAAGAGATTGAC  | AGGATGGAGAGAAGAGAGAGA | 55.63,54.78 | 157 |
| CakTSSR04451 | CakTC42998 | (TGC)5    | 815  | 829  | --          | --        |                        |                       |             |     |
| CakTSSR04452 | CakTC42999 | (ACCCCT)5 | 1473 | 1497 | --          | TUB       | TTCTTAAACGACATCTTCAAC  | CAGTTTCTTCCACAAAAGCTA | 54.54,54.96 | 153 |
| CakTSSR04453 | CakTC42999 | (ATG)7    | 1716 | 1736 | --          | TUB       | GAAACTGAGCACTAGGAGTTG  | CTTCTCTGCTTCATCTTCA   | 54.33,54.96 | 169 |
| CakTSSR04454 | CakTC43001 | (AG)10    | 833  | 852  | --          | --        |                        |                       |             |     |
| CakTSSR04455 | CakTC43003 | (AGA)5    | 32   | 46   | --          | --        |                        |                       |             |     |
| CakTSSR04456 | CakTC43006 | (CTT)5    | 263  | 277  | --          | --        | ACCTGAGATCACAATCAATCA  | TCATCGGATTGAGTAGAGAAA | 55.48,55.03 | 159 |
| CakTSSR04457 | CakTC43019 | (AG)9     | 15   | 32   | Young_pod   | --        |                        |                       |             |     |
| CakTSSR04458 | CakTC43023 | (TC)6     | 50   | 61   | --          | --        |                        |                       |             |     |
| CakTSSR04459 | CakTC43038 | (TC)17    | 155  | 188  | --          | --        | TAGTCCTCACAAGGGAACATA  | CCTTGAGAGGTTTACAAAACA | 54.82,54.64 | 149 |
| CakTSSR04460 | CakTC43040 | (GA)7     | 1    | 14   | --          | --        |                        |                       |             |     |
| CakTSSR04461 | CakTC43042 | (TG)7     | 3343 | 3356 | Young_pod   | --        |                        |                       |             |     |
| CakTSSR04462 | CakTC43043 | (GAA)5    | 1781 | 1795 | --          | --        | ATAAAAGACTTTCTCCATCG   | AAAATCCTAATGTGAGGGAAC | 55.16,54.84 | 154 |
| CakTSSR04463 | CakTC43045 | (ACA)6    | 729  | 746  | Shoot       | --        | AAATTCAATCCAACGTCAAC   | AGAGAGAGAAGAAGGGTGGAT | 55.04,56.1  | 146 |
| CakTSSR04464 | CakTC43053 | (TC)8     | 1908 | 1923 | --          | --        |                        |                       |             |     |
| CakTSSR04465 | CakTC43054 | (TGC)5    | 343  | 357  | Mature Leaf | LIM       | ACCTGTCTCTGTGTCTGATGT  | AGCCTCACTTTTCTCAGTTGT | 54.53,55.77 | 152 |
| CakTSSR04466 | CakTC43067 | (AAC)5    | 195  | 209  | --          | --        | TTACTTCATCGTTTCTCGTTA  | TCGAGTGGTTCTTTAAGTTTG | 55.16,54.8  | 153 |
| CakTSSR04467 | CakTC43073 | (AG)11    | 1016 | 1037 | --          | --        |                        |                       |             |     |
| CakTSSR04468 | CakTC43076 | (ATG)5    | 972  | 986  | --          | --        | GCCATAAGGCAATAAAAAGTA  | TATCTTCCAAACAAAATGCAC | 54.08,55.4  | 150 |
| CakTSSR04469 | CakTC43078 | (GAT)5    | 293  | 307  | --          | --        | AGGTTTCCATTTAACACTTCC  | AGTACCTGCTTTGAGTCCTTT | 54.92,54.9  | 142 |
| CakTSSR04470 | CakTC43078 | (TGG)8    | 720  | 743  | --          | --        | GTTCACTGTGATGGTGATGAT  | ATTTGGTAGGGTTAAGCATGT | 55.69,55.38 | 161 |
| CakTSSR04471 | CakTC43094 | (AT)6     | 13   | 24   | Young_pod   | --        |                        |                       |             |     |
| CakTSSR04472 | CakTC43096 | (CAA)5    | 184  | 198  | --          | --        | TGTAAAACAAAGTGAAGGAA   | CGGTTGAAGAAGAAGTACAGA | 55.05,54.77 | 152 |
| CakTSSR04473 | CakTC43107 | (ATG)5    | 1371 | 1385 | --          | HB        | TTGAAAACATTGACTTGATCC  | AGGCCAAATTTCTTGTACTCT | 55.19,54.84 | 147 |

|              |            |         |      |      |             |          |                        |                       |             |     |
|--------------|------------|---------|------|------|-------------|----------|------------------------|-----------------------|-------------|-----|
| CakTSSR04474 | CakTC43107 | (TA)6   | 1716 | 1727 | --          | HB       | AATCATGGAAAGGTCAAGAAC  | TTCAAGTGTACCTCTTCAACC | 55.71,54.43 | 152 |
| CakTSSR04475 | CakTC43111 | (CA)7   | 8    | 21   | --          | TCP      |                        |                       |             |     |
| CakTSSR04476 | CakTC43111 | (TCA)7  | 276  | 296  | --          | TCP      | CAACCAAAAAGACAAGAATGA  | GGCTCTTGATACCCCTACAAT | 55.45,55.03 | 161 |
| CakTSSR04477 | CakTC43112 | (CT)24  | 1    | 48   | Mature Leaf | bHLH     |                        |                       |             |     |
| CakTSSR04478 | CakTC43112 | (CAA)7  | 566  | 586  | Mature Leaf | bHLH     | TCTTACACCAAAACACAACA   | GAAGTGTGTGTGTTCCATA   | 54.26,55.15 | 154 |
| CakTSSR04479 | CakTC43112 | (CAC)6  | 727  | 744  | Mature Leaf | bHLH     | TATGGGAAACAACAACACTTC  | ATCGAAAAAGAAGCGTTAAA  | 55.15,54.58 | 153 |
| CakTSSR04480 | CakTC43117 | (ATA)5  | 550  | 564  | --          | LOB      | ACAAGAATCACCACAACAATC  | GTAGTTGTCCTTCATGTCCAA | 54.95,55.13 | 156 |
| CakTSSR04481 | CakTC43118 | (TCA)5  | 694  | 708  | --          | --       | CAAGTTAATTGCAGGAAGAAA  | AATCCTCTCTTTTTGTTTCA  | 54.9,55.6   | 148 |
| CakTSSR04482 | CakTC43119 | (AT)7   | 1867 | 1880 | --          | --       |                        |                       |             |     |
| CakTSSR04483 | CakTC43127 | (TTTA)5 | 960  | 979  | --          | --       |                        |                       |             |     |
| CakTSSR04484 | CakTC43129 | (CAG)5  | 3077 | 3091 | --          | --       | ACATCAAGCGTATTACCACAT  | GTCGCAATTGAATATAATGCT | 54.73,54.65 | 148 |
| CakTSSR04485 | CakTC43131 | (AAG)6  | 45   | 62   | --          | --       |                        |                       |             |     |
| CakTSSR04486 | CakTC43135 | (AG)7   | 30   | 43   | --          | --       |                        |                       |             |     |
| CakTSSR04487 | CakTC43137 | (CTC)5  | 388  | 402  | --          | Trihelix | CTAACCACACCTCTCTAAAAT  | GGCGTAGGATAGTAAAGAAGG | 54.97,54.98 | 125 |
| CakTSSR04488 | CakTC43146 | (TCT)6  | 128  | 145  | --          | --       | CACCTCACTCATTTC AATTCC | AAGTCTAGGGTTTGTGCATTA | 54.77,54.2  | 153 |
| CakTSSR04489 | CakTC43160 | (AG)6   | 943  | 954  | --          | --       |                        |                       |             |     |
| CakTSSR04490 | CakTC43178 | (TGA)5  | 285  | 299  | --          | --       | TTGTTGGGAATGAAGATACTG  | CCTGTTTTCTCTAAGAAGCTC | 55.24,55.12 | 143 |
| CakTSSR04491 | CakTC43179 | (AG)10  | 1000 | 1019 | --          | --       |                        |                       |             |     |
| CakTSSR04492 | CakTC43190 | (GGA)6  | 987  | 1004 | --          | --       | AGATTCACAGCCAATAGCATA  | GTCAACAGAAATCAAACGAGT | 55.1,54.41  | 148 |
| CakTSSR04493 | CakTC43192 | (AT)8   | 176  | 191  | --          | --       | CACATGCACCTTTTTATTTC   | ACCAATTACAGGGTGTGTTTT | 55.01,55.27 | 166 |
| CakTSSR04494 | CakTC43193 | (GAA)5  | 475  | 489  | --          | --       | CACCATAGCTACACCTGAAAA  | ACACCAACAACAACATCAGTT | 55.52,55.41 | 150 |
| CakTSSR04495 | CakTC43198 | (ATA)8  | 742  | 765  | Shoot       | MYB      | TTCTAGAAGGTTGGATGAGAA  | TGAAACTAAATCTCTCCATGA | 54.17,54.23 | 149 |
| CakTSSR04496 | CakTC43198 | (CTT)5  | 940  | 954  | Shoot       | MYB      | AACCTGTGATTCTATGCCTGA  | ACCCTCTCAAGAAATGACA   | 54.97,54.83 | 149 |
| CakTSSR04497 | CakTC43199 | (TAT)5  | 117  | 131  | --          | --       | TTTTGATTCCATACATTGCTC  | AACGGTTGAAATTAGGAGAAG | 55.32,55.24 | 147 |
| CakTSSR04498 | CakTC43210 | (ACT)5  | 122  | 136  | --          | --       | TCGTCATCTCTTTTCAAAC    | AGAGAGAAGGTGAAGGTGAAG | 54.64,55.25 | 138 |
| CakTSSR04499 | CakTC43213 | (CT)6   | 911  | 922  | --          | --       |                        |                       |             |     |
| CakTSSR04500 | CakTC43233 | (TA)7   | 1919 | 1932 | --          | --       |                        |                       |             |     |
| CakTSSR04501 | CakTC43238 | (AG)7   | 968  | 981  | --          | --       |                        |                       |             |     |
| CakTSSR04502 | CakTC43250 | (TC)15  | 799  | 828  | --          | --       | AGCTCCATCTATGTAACCACA  | AGAAAAGTACCCAAACTCGAC | 54.84,55.14 | 143 |
| CakTSSR04503 | CakTC43257 | (TAA)5  | 85   | 99   | --          | --       |                        |                       |             |     |
| CakTSSR04504 | CakTC43268 | (AG)10  | 42   | 61   | --          | --       |                        |                       |             |     |
| CakTSSR04505 | CakTC43278 | (CAC)5  | 379  | 393  | --          | --       | ATATCATCACCACCACCAATA  | CAATACACTGAGGGTGATTTT | 55.15,54.25 | 152 |
| CakTSSR04506 | CakTC43281 | (TC)14  | 141  | 168  | --          | --       | CGTCTCATTGAAGCACTTATT  | CAGAGAGTGAAGAAGCAAAGA | 54.74,55.05 | 147 |
| CakTSSR04507 | CakTC43282 | (TCA)7  | 302  | 322  | --          | --       | AAAATAGGTGCAGAGAAAGGT  | GTGGCACTTTTGCTAATTTT  | 54.84,54.74 | 148 |
| CakTSSR04508 | CakTC43285 | (CA)8   | 161  | 176  | --          | --       | TTCTTTGTTTCTCTTCGTCA   | GAACAGTTGGAGAGAGATTCC | 55.32,55.42 | 150 |
| CakTSSR04509 | CakTC43290 | (GA)8   | 789  | 804  | --          | --       | GGGGTTTTTATAGGTGAGAAA  | TGAGTCCTTATGCCATCATT  | 55.03,55.77 | 148 |
| CakTSSR04510 | CakTC43305 | (AG)7   | 872  | 885  | --          | --       |                        |                       |             |     |

|               |            |                                                                                                                            |      |      |    |          |                       |                       |             |     |
|---------------|------------|----------------------------------------------------------------------------------------------------------------------------|------|------|----|----------|-----------------------|-----------------------|-------------|-----|
| CakTSSR04511  | CakTC43306 | (CGCAT)5                                                                                                                   | 23   | 47   | -- | --       |                       |                       |             |     |
| CakTSSR04512  | CakTC43325 | (AAC)5                                                                                                                     | 43   | 57   | -- | --       |                       |                       |             |     |
| CakTSSR04513  | CakTC43337 | (TG)7                                                                                                                      | 452  | 465  | -- | --       | AGGAACGAAGAAATTTGAGAC | AACCCTCCAGAACTTTTAAC  | 55.18,54.29 | 153 |
| CakTSSR04514  | CakTC43345 | (TAT)5                                                                                                                     | 793  | 807  | -- | --       | ATGAGAAGACATGGTTGATGA | ATTCCTTCCTTTCTCTCT    | 55.48,55.35 | 150 |
| CakTSSR04515  | CakTC43360 | (GGT)6                                                                                                                     | 865  | 882  | -- | --       |                       |                       |             |     |
| CakTSSR04516  | CakTC43367 | (GGA)5                                                                                                                     | 379  | 393  | -- | --       | TGAGGACAGGACGGATATT   | GAAATCAAGTGTGGATCATGT | 55.4,54.86  | 152 |
| CakTSSR04517  | CakTC43372 | (TCTCT)6                                                                                                                   | 66   | 95   | -- | --       |                       |                       |             |     |
| CakTSSR04518  | CakTC43379 | (AC)6                                                                                                                      | 18   | 29   | -- | --       |                       |                       |             |     |
| CakTcSSR04519 | CakTC00095 | actcaa(AC)6aaatggcaattgaaaacca<br>agagaccactgtcagagaaatcaagccaaag<br>aacagaagaatcatgggtgctggaggtcc(T<br>GA)5               | 126  | 291  | -- | PLATZ    |                       |                       |             |     |
| CakTcSSR04520 | CakTC00742 | (AG)6a(AG)6                                                                                                                | 153  | 177  | -- | --       |                       |                       |             |     |
| CakTcSSR04521 | CakTC00962 | (CTT)5ccatcaatattacaactcagcacca<br>g(CAC)6                                                                                 | 516  | 575  | -- | --       |                       |                       |             |     |
| CakTcSSR04522 | CakTC01101 | (ATT)5ggaagaagaagaaggaactgttgt<br>aatgg(TAC)5                                                                              | 535  | 594  | -- | Trihelix |                       |                       |             |     |
| CakTcSSR04523 | CakTC01341 | (CT)7(AT)8(GT)8                                                                                                            | 1    | 46   | -- | --       |                       |                       |             |     |
| CakTcSSR04524 | CakTC01845 | (AG)8c(GA)8                                                                                                                | 1133 | 1165 | -- | --       |                       |                       |             |     |
| CakTcSSR04525 | CakTC01938 | (AC)6agtaagcatatactcgagaagatgatc<br>caacacaagccctactcaaatg(CAT)5                                                           | 107  | 182  | -- | --       |                       |                       |             |     |
| CakTcSSR04526 | CakTC02186 | (GT)6(GA)9ac(GTT)5                                                                                                         | 630  | 676  | -- | --       |                       |                       |             |     |
| CakTcSSR04527 | CakTC02409 | (GA)6agagtagaatgaatggttttagtaaag<br>ttgttcacggatggatcaggtgtttgtgtgtca<br>caaagtcccaatagagagaa(AG)12                        | 3354 | 3472 | -- | --       |                       |                       |             |     |
| CakTcSSR04528 | CakTC02601 | (CAT)6caaccggatccttccctcaactccac<br>caccacctaacaacatcaagcagctctagatc<br>ctcaacacaaacaccaccaacaacaacgtatc<br>attattat(CAA)6 | 46   | 180  | -- | GRAS     |                       |                       |             |     |
| CakTcSSR04529 | CakTC03065 | (AG)6ttgggtggagagaaaagtgatggatgt<br>gtttgaaaatacaaaagctgttgaagacaaattt<br>tttgcacagcataatagt(AACA)5                        | 155  | 266  | -- | --       |                       |                       |             |     |
| CakTcSSR04530 | CakTC03605 | (CT)10(AT)10                                                                                                               | 448  | 487  | -- | --       |                       |                       |             |     |
| CakTcSSR04531 | CakTC03724 | (TC)6ta(CT)12                                                                                                              | 762  | 799  | -- | --       |                       |                       |             |     |
| CakTcSSR04532 | CakTC03862 | (TCA)8attatgggtccgagttaaatgttcgt<br>gatttatcatcttctatttcgaagaatgatcgtg(<br>CTT)5                                           | 214  | 313  | -- | --       |                       |                       |             |     |
| CakTcSSR04533 | CakTC03896 | (AG)6aacc(CAACA)5                                                                                                          | 2248 | 2288 | -- | --       |                       |                       |             |     |

|               |            |                                                                                                                        |      |      |      |         |  |  |  |  |
|---------------|------------|------------------------------------------------------------------------------------------------------------------------|------|------|------|---------|--|--|--|--|
| CakTcSSR04534 | CakTC03955 | (TCT)11tggttgaaggaattgtagttgtcttc<br>cagttgtataagaagacctgtgtgttttcattg<br>ttaa(TAT)8                                   | 3491 | 3614 | --   | --      |  |  |  |  |
| CakTcSSR04535 | CakTC04190 | (GGA)9tcccgaacgcctcgat(GGA)5                                                                                           | 390  | 449  | Root | --      |  |  |  |  |
| CakTcSSR04536 | CakTC04948 | (AAG)8aaacca(CAAAAT)5                                                                                                  | 41   | 100  | --   | --      |  |  |  |  |
| CakTcSSR04537 | CakTC05291 | (TA)6ttacccttagcatttatctgct(ATC)6                                                                                      | 74   | 125  | --   | MADS    |  |  |  |  |
| CakTcSSR04538 | CakTC05550 | (TG)9(AG)9                                                                                                             | 120  | 155  | --   | --      |  |  |  |  |
| CakTcSSR04539 | CakTC05622 | (GA)10ttaacattgattgggaatcaagacg<br>agacgagaagaa(AG)17                                                                  | 6    | 97   | --   | --      |  |  |  |  |
| CakTcSSR04540 | CakTC05841 | (CT)9catccccactc(ACA)5                                                                                                 | 9    | 52   | --   | --      |  |  |  |  |
| CakTcSSR04541 | CakTC06135 | (AGT)5aatattgtagac(TTA)5                                                                                               | 170  | 212  | --   | --      |  |  |  |  |
| CakTcSSR04542 | CakTC07079 | (TGA)5(GA)12                                                                                                           | 333  | 369  | --   | --      |  |  |  |  |
| CakTcSSR04543 | CakTC07444 | (AAC)5aataacaattacaataacaatacaa<br>taacaatgacgacaacaacagcaatgacgaca<br>ataacaacaacaataacaatggaggaagaaa<br>gaagag(AAC)5 | 108  | 233  | --   | --      |  |  |  |  |
| CakTcSSR04544 | CakTC07484 | (CCG)5ctccacgaattaactgtttcgtctcg<br>tctttctcattctcacagacactaagtcattga<br>aac(GTT)5                                     | 4    | 98   | --   | --      |  |  |  |  |
| CakTcSSR04545 | CakTC07484 | (GA)6aagaggaaaaacccaatcgatcgta<br>gaaataaaaactcacata(GT)11                                                             | 325  | 402  | --   | --      |  |  |  |  |
| CakTcSSR04546 | CakTC07556 | (TGT)5tggaagtctattgagagcaacattga<br>aacaagaattcaagagctctacattgaagaatat<br>gt(GAA)6                                     | 2849 | 2942 | --   | --      |  |  |  |  |
| CakTcSSR04547 | CakTC07724 | (TC)11(AC)8                                                                                                            | 558  | 595  | --   | --      |  |  |  |  |
| CakTcSSR04548 | CakTC07755 | (AC)10agagaaagagagatagtgacatag<br>ga(AG)11                                                                             | 157  | 224  | --   | --      |  |  |  |  |
| CakTcSSR04549 | CakTC07869 | (AG)7attaacgtgaagctgaagagaggtg<br>gtagttggaaaagaattgaaatgaagaataca<br>aaggctagaaatatagagaaaatggtt(GA)<br>11            | 2236 | 2358 | --   | --      |  |  |  |  |
| CakTcSSR04550 | CakTC07952 | (AAT)5aaaaaaaggaacaagaataactc<br>acgggtgcgtggaatggaattggaagga<br>gagatatagtggacagataagtcaggggaa<br>aaagct(GA)6         | 426  | 545  | --   | --      |  |  |  |  |
| CakTcSSR04551 | CakTC08009 | (CCA)6(CCT)6                                                                                                           | 741  | 776  | --   | G2-like |  |  |  |  |
| CakTcSSR04552 | CakTC08170 | (GAA)5gacaaagtgcacacagacacttt<br>tgtcacagccctcgttgcaagatacattatttg(<br>TCT)6                                           | 1255 | 1345 | --   | ARF     |  |  |  |  |

|               |            |                                                                                                 |      |      |       |          |  |  |  |
|---------------|------------|-------------------------------------------------------------------------------------------------|------|------|-------|----------|--|--|--|
| CakTcSSR04553 | CakTC08248 | (CT)18cctaactctaattcttttgattgtgatct<br>actagaccagtggtggatctatatctctttagt<br>gaaac(AGA)5         | 76   | 195  | --    | --       |  |  |  |
| CakTcSSR04554 | CakTC08491 | (CT)13(CA)12                                                                                    | 149  | 198  | --    | --       |  |  |  |
| CakTcSSR04555 | CakTC08760 | (TCT)5tgcaa(TTC)7                                                                               | 546  | 586  | --    | --       |  |  |  |
| CakTcSSR04556 | CakTC08787 | (GAA)5gacaataagttgaaaaagccaaa<br>atgtcttcacatcaagcacaaatactgaaaccc<br>tta(CTT)15                | 31   | 151  | --    | --       |  |  |  |
| CakTcSSR04557 | CakTC08807 | (GAT)5aataatgatgatgata(ATG)6                                                                    | 1729 | 1780 | --    | --       |  |  |  |
| CakTcSSR04558 | CakTC08871 | (AG)10aaagagaggagtgcataaaacag<br>agtgtgtcaatgcagagagagagaaggact<br>gttgagtggggagtgt(AG)6        | 5843 | 5945 | --    | Jumonji  |  |  |  |
| CakTcSSR04559 | CakTC08883 | (TTG)7atgatgatgtgtgtgctgaa(GT<br>T)8                                                            | 122  | 189  | --    | --       |  |  |  |
| CakTcSSR04560 | CakTC08930 | (CT)7cgttctgtctagtctctctcggctctct<br>cgttctgtctcattcgtctctctca(CT)6                             | 107  | 188  | Shoot | --       |  |  |  |
| CakTcSSR04561 | CakTC09147 | (TC)6tgaaactcactttctcttctaacacattt<br>(TC)7                                                     | 39   | 94   | --    | --       |  |  |  |
| CakTcSSR04562 | CakTC09652 | (TTC)5tgtttcactaaagaaatagatcca<br>cacactggtctagtagatcacaataaaaagaat<br>tagagttag(GA)14a(AG)6    | 2206 | 2330 | --    | --       |  |  |  |
| CakTcSSR04563 | CakTC09663 | (TTC)11ttggttgaaggaattgtagttgtctt<br>ccagttgtataagaagacctgtgtgttttcatt<br>gttaa(TAT)8           | 3339 | 3463 | --    | --       |  |  |  |
| CakTcSSR04564 | CakTC09756 | (TCT)6cttcactcttctcattccaac(ACA)5                                                               | 783  | 834  | --    | --       |  |  |  |
| CakTcSSR04565 | CakTC09761 | ggcaagtgcaggtcagctcaacaaccaaactg<br>gaagataaatcaattattaatttgacattaatatt<br>ctaaga(TAT)6         | 1644 | 1775 | --    | --       |  |  |  |
| CakTcSSR04566 | CakTC09934 | (ATT)5ggaagaagaagaaggaactgttgt<br>aatgg(TAC)5                                                   | 608  | 667  | --    | Trihelix |  |  |  |
| CakTcSSR04567 | CakTC10032 | (TA)9aattatatattataatt(TA)8                                                                     | 1835 | 1885 | --    | --       |  |  |  |
| CakTcSSR04568 | CakTC10077 | (ACA)5acgcttcaggacacacctgaggata<br>ttttatatattgtaataatcattatt(TTA)5                             | 116  | 196  | --    | --       |  |  |  |
| CakTcSSR04569 | CakTC10079 | (AG)7aagacaaaagaacagttgct(GA<br>)11                                                             | 1309 | 1366 | --    | LUG      |  |  |  |
| CakTcSSR04570 | CakTC10172 | (GA)6agagtagaatgaatggttttagtaaat<br>tgttcacggatggatcaggtgtgtgtgtcaca<br>aagtcceaataagagaa(AG)12 | 2991 | 3107 | --    | --       |  |  |  |
| CakTcSSR04571 | CakTC10190 | (CTT)5ccatcaatattacaacttcagcacca<br>g(CAC)6                                                     | 507  | 566  | --    | --       |  |  |  |

|               |            |                                                                                                                             |      |      |           |         |  |  |  |
|---------------|------------|-----------------------------------------------------------------------------------------------------------------------------|------|------|-----------|---------|--|--|--|
| CakTcSSR04572 | CakTC10212 | (CAG)6(CAT)5                                                                                                                | 1294 | 1326 | --        | --      |  |  |  |
| CakTcSSR04573 | CakTC10232 | (AC)6(TC)10                                                                                                                 | 1    | 32   | --        | --      |  |  |  |
| CakTcSSR04574 | CakTC10238 | (AG)8tattgaattgtat(GA)13                                                                                                    | 1061 | 1116 | --        | BBR/BPC |  |  |  |
| CakTcSSR04575 | CakTC10593 | (CAT)6caaccgcatccttccctcaactccac<br>caccaccttaacaacatcaagcagctctagatc<br>ctcaacacaaacaccaccaacaacaacgtatc<br>attattat(CAA)6 | 46   | 180  | --        | GRAS    |  |  |  |
| CakTcSSR04576 | CakTC10676 | (TGT)5tggttggtgtggtaccataccaa<br>ttgttggtgttctgaattacctgtaattgtgacg<br>tttggt(GTT)6                                         | 1796 | 1898 | --        | HB      |  |  |  |
| CakTcSSR04577 | CakTC11026 | (ATT)5ata(ATT)5                                                                                                             | 1008 | 1040 | --        | --      |  |  |  |
| CakTcSSR04578 | CakTC11338 | (GAA)6gttcataattcatatttcatatatggaa<br>cagaaagaggagtagtagtac(GT)7                                                            | 247  | 327  | --        | --      |  |  |  |
| CakTcSSR04579 | CakTC11419 | (AG)8c(GA)8                                                                                                                 | 1102 | 1134 | --        | --      |  |  |  |
| CakTcSSR04580 | CakTC11461 | (AG)6aacc(CAACA)5                                                                                                           | 2248 | 2288 | --        | --      |  |  |  |
| CakTcSSR04581 | CakTC11583 | (ATG)6atagcagataaatgctaagggtta(A<br>T)6                                                                                     | 647  | 699  | --        | MADS    |  |  |  |
| CakTcSSR04582 | CakTC11700 | (CT)9(AT)9                                                                                                                  | 20   | 55   | --        | --      |  |  |  |
| CakTcSSR04583 | CakTC11722 | (TC)6agcttttcccctgcacttatctgttccac<br>tatatctctccttccaatttcattttccacgcac<br>cgtgagtatttcttgttcctttt(TTA)5                   | 23   | 140  | --        | --      |  |  |  |
| CakTcSSR04584 | CakTC11813 | (CT)26(CTA)5*                                                                                                               | 846  | 910  | --        | --      |  |  |  |
| CakTcSSR04585 | CakTC12013 | (TTTGAT)6tttgagaggta(TTG)7                                                                                                  | 457  | 525  | --        | --      |  |  |  |
| CakTcSSR04586 | CakTC12211 | (TGT)5tggaagtctattgagagcaacattga<br>aacaagttcaagagctctacattgaagaatat<br>gt(GAA)6                                            | 519  | 612  | --        | --      |  |  |  |
| CakTcSSR04587 | CakTC12327 | (GAA)5gcacgatcattcttcgaaatagaag<br>atgataaatcacgaacatttaactcggaaacca<br>taat(TGA)8                                          | 881  | 981  | --        | --      |  |  |  |
| CakTcSSR04588 | CakTC12531 | (GAA)5attgaag(AAC)5aaggagaaga<br>ggaggaggaggagtagaagaagttgaagaa<br>gaagaaggaggaggag(GAA)5gagagaa<br>ga(AG)6(GAG)5*          | 191  | 331  | --        | --      |  |  |  |
| CakTcSSR04589 | CakTC12709 | (GAA)5gacaaagtacaaacacagacact<br>ttgtcacagccctcgttgaagatacattatttg<br>(TCT)6                                                | 162  | 253  | --        | --      |  |  |  |
| CakTcSSR04590 | CakTC12813 | ggtgatgcggagagtgaagttagaagattatg<br>gttggttgaggcgcaaatctcaagaga(CT)<br>6t(TC)6                                              | 1    | 127  | Young_pod | --      |  |  |  |
| CakTcSSR04591 | CakTC13528 | (GAGAGG)5(GA)8                                                                                                              | 390  | 435  | --        | LOB     |  |  |  |
| CakTcSSR04592 | CakTC13530 | (TC)8(CTCTCC)5                                                                                                              | 161  | 201  | --        | --      |  |  |  |

|               |            |                                                                                                                |      |      |      |     |  |  |  |  |
|---------------|------------|----------------------------------------------------------------------------------------------------------------|------|------|------|-----|--|--|--|--|
| CakTcSSR04593 | CakTC13563 | (CCT)5actactacta(CTC)5                                                                                         | 648  | 687  | Root | --  |  |  |  |  |
| CakTcSSR04594 | CakTC13567 | (ATC)5aaagcatttgattgt(TAA)8                                                                                    | 924  | 977  | --   | --  |  |  |  |  |
| CakTcSSR04595 | CakTC13582 | (TTG)5tgttggaatgaaagatgaag(AGA)6                                                                               | 135  | 187  | --   | --  |  |  |  |  |
| CakTcSSR04596 | CakTC13755 | (TAA)6ccaagttgttgaagaaattgttaataa<br>a(AAT)7                                                                   | 920  | 986  | --   | --  |  |  |  |  |
| CakTcSSR04597 | CakTC13763 | (GAA)6naganananananananagag(AGA)17                                                                             | 168  | 257  | --   | --  |  |  |  |  |
| CakTcSSR04598 | CakTC14546 | (TA)7ttttaatcttttaaaaattgtgtacataatt<br>tatttaattac(AAT)5                                                      | 137  | 208  | --   | --  |  |  |  |  |
| CakTcSSR04599 | CakTC14584 | (ATC)9aagatcttgaatc(TCA)5                                                                                      | 421  | 475  | --   | --  |  |  |  |  |
| CakTcSSR04600 | CakTC14778 | (TTTA)5(TTA)15                                                                                                 | 55   | 116  | --   | --  |  |  |  |  |
| CakTcSSR04601 | CakTC15120 | (CA)13ctcttactctcgtctctttctct(CA)14                                                                            | 298  | 375  | --   | --  |  |  |  |  |
| CakTcSSR04602 | CakTC15287 | (ATGA)5tatcaattggccattattcaataag<br>tatatatcttttctctctctaggtctttctctctttc<br>a(CT)6                            | 272  | 369  | --   | --  |  |  |  |  |
| CakTcSSR04603 | CakTC15506 | (CAA)5cgt(TC)9(AC)6                                                                                            | 114  | 161  | --   | --  |  |  |  |  |
| CakTcSSR04604 | CakTC15587 | (AG)10aaccatgctcgatctctcatagtc<br>atcgtcggccatggatgaatgaagagatt(GT<br>TGA)5                                    | 772  | 871  | --   | --  |  |  |  |  |
| CakTcSSR04605 | CakTC15600 | (CT)8gtagagtcaatttctctctcttattat<br>acttctattttcat(TC)6                                                        | 1273 | 1344 | --   | --  |  |  |  |  |
| CakTcSSR04606 | CakTC15984 | (TAA)5tag(TAA)5tag(TAA)37(AT<br>A)11                                                                           | 118  | 297  | --   | --  |  |  |  |  |
| CakTcSSR04607 | CakTC16009 | (GAT)5aataatgatgatgatgata(ATG)6                                                                                | 1562 | 1613 | --   | --  |  |  |  |  |
| CakTcSSR04608 | CakTC16126 | (AGA)5(AG)6*                                                                                                   | 2244 | 2267 | --   | --  |  |  |  |  |
| CakTcSSR04609 | CakTC16518 | (TAAA)6(AAT)5*atac(ATA)33                                                                                      | 366  | 505  | --   | --  |  |  |  |  |
| CakTcSSR04610 | CakTC16558 | (AAG)7(TTG)5                                                                                                   | 1088 | 1123 | --   | --  |  |  |  |  |
| CakTcSSR04611 | CakTC16567 | (TC)8ttccattcttcttcaacaacaatatcat<br>cacatcaacccttctctcagagag(ATC)<br>)6                                       | 219  | 310  | --   | NAC |  |  |  |  |
| CakTcSSR04612 | CakTC16635 | (TC)7gtccattcatca(TC)11                                                                                        | 68   | 116  | --   | --  |  |  |  |  |
| CakTcSSR04613 | CakTC16681 | (ACA)6catacaccacttcaacaacaacatc<br>agtcat(CAA)8                                                                | 948  | 1021 | --   | --  |  |  |  |  |
| CakTcSSR04614 | CakTC17154 | (TC)13(CTA)7*                                                                                                  | 159  | 204  | --   | --  |  |  |  |  |
| CakTcSSR04615 | CakTC17156 | (CTTCT)5tctactccaacgttatggaatca<br>tcacacatcaacc(TCT)7                                                         | 162  | 246  | --   | --  |  |  |  |  |
| CakTcSSR04616 | CakTC17546 | (CT)7ttctcttcaattcaacactccttcttat<br>tattaatcctaattccattacttataaatcctctat<br>tttcacgcattctatcgattcattcatt(TC)6 | 103  | 225  | --   | --  |  |  |  |  |

|               |            |                                                                                                                         |      |      |            |       |  |  |  |
|---------------|------------|-------------------------------------------------------------------------------------------------------------------------|------|------|------------|-------|--|--|--|
| CakTcSSR04617 | CakTC17594 | (AT)8(AC)11                                                                                                             | 2    | 39   | --         | --    |  |  |  |
| CakTcSSR04618 | CakTC17633 | (TC)16ttctatttcacaaagttctgttccca<br>aaagatctgtggagaatagga(AG)13                                                         | 156  | 263  | --         | --    |  |  |  |
| CakTcSSR04619 | CakTC17706 | (TA)9tc(TA)7                                                                                                            | 382  | 415  | --         | CCAAT |  |  |  |
| CakTcSSR04620 | CakTC17953 | (ATT)10tcgccaccctcaccaagacacata<br>t(AG)10                                                                              | 133  | 207  | --         | --    |  |  |  |
| CakTcSSR04621 | CakTC18100 | (TAG)5cttt(TGAA)5                                                                                                       | 1    | 39   | --         | --    |  |  |  |
| CakTcSSR04622 | CakTC18118 | (CT)7(TCT)5*tcctctctcttcttctt<br>caacttcttctacttctctctctcttctc(T<br>TG)5ttcttcaat(TTC)5                                 | 1207 | 1327 | --         | --    |  |  |  |
| CakTcSSR04623 | CakTC18370 | (CT)7atctatctc(TC)8                                                                                                     | 69   | 108  | --         | --    |  |  |  |
| CakTcSSR04624 | CakTC18391 | (GA)10aagaagaggaccaaagaaaagg<br>aaaagaaggaatagaaaaagaatacaga<br>ttcatataacgatca(AG)6tgtgtgcgaatag<br>c(ATT)9            | 34   | 175  | --         | --    |  |  |  |
| CakTcSSR04625 | CakTC19052 | (AG)18gaggaggagagaggaggagg(<br>GA)19                                                                                    | 506  | 600  | --         | CCAAT |  |  |  |
| CakTcSSR04626 | CakTC19054 | (TC)9tgtctc(TC)9                                                                                                        | 1369 | 1411 | --         | --    |  |  |  |
| CakTcSSR04627 | CakTC19396 | (TCA)8tgttcaatgctactacctaattctct<br>ggaggagctgtttcaaatattgctactaccccc<br>tacct(CCA)7                                    | 231  | 342  | --         | LOB   |  |  |  |
| CakTcSSR04628 | CakTC19555 | (CT)6(CA)6ct(CA)7                                                                                                       | 268  | 307  | --         | --    |  |  |  |
| CakTcSSR04629 | CakTC19611 | (TC)8ta(TC)7                                                                                                            | 467  | 498  | Flower bud | --    |  |  |  |
| CakTcSSR04630 | CakTC20220 | (TCT)7ttcccttt(CAA)5                                                                                                    | 23   | 67   | --         | --    |  |  |  |
| CakTcSSR04631 | CakTC20489 | (ATT)13tattattattata(ATT)16                                                                                             | 362  | 461  | --         | --    |  |  |  |
| CakTcSSR04632 | CakTC20781 | (AT)6gtgtg(TA)6(GA)6                                                                                                    | 490  | 530  | --         | --    |  |  |  |
| CakTcSSR04633 | CakTC20846 | (TC)15t(TC)10                                                                                                           | 1    | 51   | --         | --    |  |  |  |
| CakTcSSR04634 | CakTC20854 | (TC)8(TA)9                                                                                                              | 16   | 49   | --         | --    |  |  |  |
| CakTcSSR04635 | CakTC21016 | (CT)9(AT)8                                                                                                              | 125  | 158  | --         | --    |  |  |  |
| CakTcSSR04636 | CakTC22203 | (AT)6gtaa(AT)8                                                                                                          | 294  | 325  | --         | --    |  |  |  |
| CakTcSSR04637 | CakTC22350 | (ACA)6ccaggcttctcactcctagtgtcta<br>gtatgactattccgacctccatttctaaggatca<br>acatgcaaaatgatccatccatcttttctatttat<br>at(TA)8 | 1122 | 1253 | --         | --    |  |  |  |
| CakTcSSR04638 | CakTC22411 | (TTG)5tgttggaatgaaagatgaag(AGA<br>)6                                                                                    | 715  | 767  | --         | --    |  |  |  |
| CakTcSSR04639 | CakTC22725 | (TC)8ta(TC)20                                                                                                           | 176  | 233  | --         | TPR   |  |  |  |
| CakTcSSR04640 | CakTC22770 | (CCT)5actactacta(CTC)5                                                                                                  | 48   | 87   | --         | --    |  |  |  |
| CakTcSSR04641 | CakTC23325 | (AG)6a(AG)6                                                                                                             | 1492 | 1516 | --         | --    |  |  |  |
| CakTcSSR04642 | CakTC23326 | (AG)10cga(AG)6                                                                                                          | 2813 | 2847 | --         | --    |  |  |  |

|               |            |                                                                                                                                             |      |      |       |       |  |  |  |
|---------------|------------|---------------------------------------------------------------------------------------------------------------------------------------------|------|------|-------|-------|--|--|--|
| CakTcSSR04643 | CakTC23352 | (ATT)5ata(ATT)5                                                                                                                             | 1020 | 1052 | --    | --    |  |  |  |
| CakTcSSR04644 | CakTC23353 | (GA)10tattggtgttatttctggaaggcaata<br>tttggacctccactgtatgactattggaaaaaga<br>agcatcaggaagaa(GCC)8                                             | 989  | 1108 | --    | --    |  |  |  |
| CakTcSSR04645 | CakTC23387 | (CT)7cgttctgtctagttctctctcgtctct<br>cgttctgtctcattcgctctctctca(CT)6                                                                         | 74   | 155  | --    | --    |  |  |  |
| CakTcSSR04646 | CakTC23597 | (AG)7aaagagga(AG)6                                                                                                                          | 58   | 91   | --    | --    |  |  |  |
| CakTcSSR04647 | CakTC23599 | (AG)7aaagagga(AG)6                                                                                                                          | 20   | 53   | --    | --    |  |  |  |
| CakTcSSR04648 | CakTC23977 | (TCT)5tccgtgaaacgctggaacatttcc<br>tcttcaatattctctcataagccatttcaattctc<br>gata(CT)10                                                         | 1333 | 1435 | --    | HB    |  |  |  |
| CakTcSSR04649 | CakTC23995 | (TTA)6tcagaagtttccaattatgatgatga<br>tgattatccatggctatgtgtaatt(TTG)5                                                                         | 2210 | 2295 | --    | WRKY  |  |  |  |
| CakTcSSR04650 | CakTC24020 | (TCA)5tcgaaatccatttgaagtgaatgaca<br>ctgatcatcactactagaacttgaagaataat<br>acc(TCA)5                                                           | 902  | 994  | --    | --    |  |  |  |
| CakTcSSR04651 | CakTC24084 | (ATC)5aggacctccagcacccatgattctc<br>tgttctttggcttgatttctctgacagtggctcttg<br>gttttcaattgccatt(TG)6tttgagtgaaatg<br>gttatttgattaagttaagt(GA)11 | 1037 | 1198 | --    | PLATZ |  |  |  |
| CakTcSSR04652 | CakTC24108 | (CT)6atctctctaacttaaccttcttcggagg<br>accctaacattattaattcattcatgtatctacat<br>catattgtatcatccttggaggggtattccttta(<br>TAT)6                    | 2746 | 2875 | --    | --    |  |  |  |
| CakTcSSR04653 | CakTC24109 | (CT)6t(TC)12                                                                                                                                | 134  | 170  | --    | --    |  |  |  |
| CakTcSSR04654 | CakTC24202 | (AG)10aaga(AG)15                                                                                                                            | 2093 | 2146 | Shoot | --    |  |  |  |
| CakTcSSR04655 | CakTC24203 | (AG)9aaga(AG)8                                                                                                                              | 465  | 502  | --    | --    |  |  |  |
| CakTcSSR04656 | CakTC24439 | (TC)11(AC)8                                                                                                                                 | 1624 | 1661 | --    | --    |  |  |  |
| CakTcSSR04657 | CakTC24499 | (CT)15cg(CT)8                                                                                                                               | 2961 | 3008 | --    | --    |  |  |  |
| CakTcSSR04658 | CakTC24546 | (TC)11ttcacactctt(CT)10                                                                                                                     | 663  | 717  | --    | --    |  |  |  |
| CakTcSSR04659 | CakTC24699 | (AAG)5cttcttcagcaatcttgactctcattt<br>caactctacatactctcatagttt(TTC)8                                                                         | 1    | 92   | --    | --    |  |  |  |
| CakTcSSR04660 | CakTC24761 | (GAAAGA)6gagagaggttgagagggtt<br>ggttttgggtgctggaaggggaaagcataaa<br>ccgaaacggaagaaccctaactaactaac(<br>CT)6                                   | 1    | 129  | --    | --    |  |  |  |
| CakTcSSR04661 | CakTC24987 | (TC)10ttccatctcc(CT)6                                                                                                                       | 168  | 210  | --    | --    |  |  |  |
| CakTcSSR04662 | CakTC25036 | (GT)6(GA)7                                                                                                                                  | 1359 | 1384 | --    | WRKY  |  |  |  |

|               |            |                                                                                                                     |      |      |            |     |  |  |  |  |
|---------------|------------|---------------------------------------------------------------------------------------------------------------------|------|------|------------|-----|--|--|--|--|
| CakTcSSR04663 | CakTC25053 | (CAG)5caacagcaacaa(CAG)5caac<br>aacaacagcagcagtcacagcatcagcagca<br>gcagcaa(CAG)5                                    | 658  | 756  | --         | LUG |  |  |  |  |
| CakTcSSR04664 | CakTC25073 | (GGA)6(GGT)6                                                                                                        | 532  | 567  | --         | --  |  |  |  |  |
| CakTcSSR04665 | CakTC25216 | (AAG)7acgatgatggtggtgtgttacagca<br>gcagaaggaggacgctagat(TTA)5                                                       | 1474 | 1555 | --         | --  |  |  |  |  |
| CakTcSSR04666 | CakTC25329 | (AAC)5cttaattcttgtctaaatctgcttga<br>gcagcacttctgagacaagtaaaggcttgaga<br>gagcaaaggagaaagataatgagtctagtttg<br>c(ACA)6 | 1260 | 1387 | --         | TCP |  |  |  |  |
| CakTcSSR04667 | CakTC25415 | (AGA)9(GGA)5                                                                                                        | 1563 | 1604 | --         | --  |  |  |  |  |
| CakTcSSR04668 | CakTC25569 | (GA)7tagagaaactactacctgtccctta<br>acactcttctcttctctctctctctctctata<br>tatattctctctca(TC)11                          | 148  | 265  | --         | --  |  |  |  |  |
| CakTcSSR04669 | CakTC25616 | (AG)12tagagtt(TG)7agagtagaaatga<br>agacgcgtaagaaagaaggagatacaataca<br>aag(GA)8                                      | 4133 | 4240 | --         | --  |  |  |  |  |
| CakTcSSR04670 | CakTC25620 | (TGA)6atctgatgattattctccattgtagga<br>gtagcatctgaagggtgaagggaagcagtagt<br>agcagaagaagca(CCT)5                        | 296  | 400  | Flower bud | TCP |  |  |  |  |
| CakTcSSR04671 | CakTC25620 | (TAA)6tgtttggtttattattagactgtgtgt<br>gct(AG)6                                                                       | 1691 | 1753 | Flower bud | TCP |  |  |  |  |
| CakTcSSR04672 | CakTC25621 | (TC)6tagcacaacacaagtctaataaataaa<br>ccaaac(ATT)6                                                                    | 544  | 606  | --         | TCP |  |  |  |  |
| CakTcSSR04673 | CakTC25621 | (GGA)5ggtgcttcttctgctactactgcttca<br>ccttcaccttcagatgctactcctacaatggaga<br>ataatcatcagat(TCA)6                      | 1896 | 2002 | --         | TCP |  |  |  |  |
| CakTcSSR04674 | CakTC25663 | (ATG)5(ATGATA)5*atgatgattcag<br>atgatgaagattgggggaagaatgctgtattgg<br>aggatgttgg(TGA)5                               | 762  | 873  | --         | --  |  |  |  |  |
| CakTcSSR04675 | CakTC25786 | (GA)8a(AG)7aa(AG)6                                                                                                  | 1269 | 1313 | --         | --  |  |  |  |  |
| CakTcSSR04676 | CakTC25940 | (TG)12(AG)11                                                                                                        | 1098 | 1143 | --         | HB  |  |  |  |  |
| CakTcSSR04677 | CakTC26102 | (AG)7atgat(GA)8                                                                                                     | 1833 | 1867 | --         | --  |  |  |  |  |
| CakTcSSR04678 | CakTC26179 | (TC)7(TG)9                                                                                                          | 243  | 274  | --         | --  |  |  |  |  |
| CakTcSSR04679 | CakTC26185 | (CCT)5ccacaaatgacaatacctcctacaa<br>agtatggaatagcatcaat(TCC)10                                                       | 3043 | 3131 | --         | --  |  |  |  |  |
| CakTcSSR04680 | CakTC26205 | (TTG)5(ATG)6                                                                                                        | 1825 | 1857 | Young_pod  | HB  |  |  |  |  |
| CakTcSSR04681 | CakTC26246 | (GA)9agagagaga(AG)17                                                                                                | 990  | 1050 | --         | --  |  |  |  |  |
| CakTcSSR04682 | CakTC26531 | (TGT)5gagtggggat(GA)9                                                                                               | 2071 | 2113 | Young_pod  | --  |  |  |  |  |

|               |            |                                                                                                                                 |      |      |            |      |  |  |  |
|---------------|------------|---------------------------------------------------------------------------------------------------------------------------------|------|------|------------|------|--|--|--|
| CakTcSSR04683 | CakTC26534 | (TTC)9tactcgtatgcaaaagggtatgccgtacaggt(TC)13                                                                                    | 155  | 239  | --         | --   |  |  |  |
| CakTcSSR04684 | CakTC26539 | (AG)7aa(AG)6                                                                                                                    | 17   | 44   | --         | --   |  |  |  |
| CakTcSSR04685 | CakTC26859 | (ATT)6gttattatcgggtgagtggtcaattgaagaaagatcaaatcaatgaaatcgcaagagatgtcttcgcaagcatcgagccagtaagagggggagga(AGCATT)5                  | 6248 | 6391 | --         | --   |  |  |  |
| CakTcSSR04686 | CakTC26984 | (TAT)8tgttattgtgtgttg(TTA)5                                                                                                     | 208  | 263  | --         | --   |  |  |  |
| CakTcSSR04687 | CakTC27201 | (TCT)6(TC)8                                                                                                                     | 1300 | 1330 | --         | ARF  |  |  |  |
| CakTcSSR04688 | CakTC27324 | (AAG)6aatcgaaattggaattgtggaagagaataaatgattagggttgaggaattgtgagggaggaggagaaagggaatggtat(TTTC)12ttgttagttggatagtcactccctcaggt(CA)6 | 1881 | 2074 | --         | --   |  |  |  |
| CakTcSSR04689 | CakTC27396 | (AG)7tcgatgttacgaagaacgcacgacacggcaagtgcaggtcagctcaacaaccaaactcgaagataaatcaattattaattgacattaatattctaaga(TAT)6                   | 1839 | 1970 | --         | --   |  |  |  |
| CakTcSSR04690 | CakTC27413 | (TTC)6tcaaacattttcccgcttttaagggaatttcacgc(ATA)5                                                                                 | 179  | 247  | Flower bud | --   |  |  |  |
| CakTcSSR04691 | CakTC27526 | (TCT)6tctcttcttctctctcttctctcatcttgcttctcgattgttcttcacgtcgtcgtctcc(TCT)5(TCA)5                                                  | 2276 | 2389 | Young_pod  | PHD  |  |  |  |
| CakTcSSR04692 | CakTC27526 | (AC)6aaatccaatttcaaagggtacaaagaaagtgcacaaccaaacacacaaacacaaacaatgaatcataattaaaaataaaaaataaaa(CA)7tctgacactacc(CTGTT)5           | 2904 | 3060 | Young_pod  | PHD  |  |  |  |
| CakTcSSR04693 | CakTC27556 | (TTC)6acataactcaaacaaaattaacatttgaggttacca(TGT)5                                                                                | 281  | 351  | --         | C2H2 |  |  |  |
| CakTcSSR04694 | CakTC27621 | (GA)11tacagtgttagtgatgggt(AG)17                                                                                                 | 954  | 1028 | --         | --   |  |  |  |
| CakTcSSR04695 | CakTC27641 | (GT)12(GA)16                                                                                                                    | 1146 | 1201 | --         | --   |  |  |  |
| CakTcSSR04696 | CakTC27769 | (TG)9(AG)9ataagaagaacaggttatggggaggacaagtctgcagagctggca(AG)19                                                                   | 3441 | 3561 | --         | --   |  |  |  |
| CakTcSSR04697 | CakTC27777 | (CT)7ttctcttcaattcaactccttctttattattaatcctaattccatttactataatcctctatttcacgcacattatcgattcattcatt(TC)6                             | 136  | 258  | Shoot      | --   |  |  |  |
| CakTcSSR04698 | CakTC27957 | (TCAG)5tca(CT)7ccgatgcgttagtgagagagtgtgtgtatgggtgtgtgtgtgggttt(GA)13                                                            | 1167 | 1281 | --         | --   |  |  |  |

|               |            |                                                                                                                     |      |      |    |          |  |  |  |  |
|---------------|------------|---------------------------------------------------------------------------------------------------------------------|------|------|----|----------|--|--|--|--|
| CakTcSSR04699 | CakTC27988 | (AG)10atagggttagggttttaaaaaagaag<br>aggtg(GAA)5                                                                     | 3368 | 3433 | -- | --       |  |  |  |  |
| CakTcSSR04700 | CakTC28008 | (TC)8tatctctctctcgagtg(TA)7                                                                                         | 2549 | 2598 | -- | --       |  |  |  |  |
| CakTcSSR04701 | CakTC28030 | (ACT)10(CT)34*                                                                                                      | 1    | 96   | -- | HB       |  |  |  |  |
| CakTcSSR04702 | CakTC28157 | (GCA)6ggagaagatgtgggaaatgagca<br>gcagcaagagggaagaggaggagtaga<br>tatgatggagttgagactgggaggagcaaga<br>gcaagtgcag(GGA)5 | 605  | 733  | -- | ABI3VP1  |  |  |  |  |
| CakTcSSR04703 | CakTC28171 | (AG)6atgtagaaaa(AG)8                                                                                                | 1918 | 1955 | -- | WRKY     |  |  |  |  |
| CakTcSSR04704 | CakTC28226 | (GA)10ttagcgcaacatctcactgatttgg<br>ggtaattttct(TTC)16                                                               | 1    | 107  | -- | --       |  |  |  |  |
| CakTcSSR04705 | CakTC28367 | (CT)9tttcattgtttcattcacttactctcagc<br>ttttgtatttggctcctttcaatttcac(CT)8                                             | 1513 | 1606 | -- | --       |  |  |  |  |
| CakTcSSR04706 | CakTC28402 | (TC)18ta(TG)7                                                                                                       | 8    | 59   | -- | --       |  |  |  |  |
| CakTcSSR04707 | CakTC28402 | (TCA)7(TTA)7                                                                                                        | 1031 | 1072 | -- | --       |  |  |  |  |
| CakTcSSR04708 | CakTC28432 | (TTAA)5tgtccattttctgacctaccccgct<br>ctttgaaataggtgccccaaagtcaa(GTTC<br>AG)5                                         | 43   | 146  | -- | --       |  |  |  |  |
| CakTcSSR04709 | CakTC28433 | (TTAA)5tgtccattttctgacctaccccgct<br>ctttgaaataggtgccccaaagtcaa(GTTC<br>AG)5                                         | 243  | 346  | -- | --       |  |  |  |  |
| CakTcSSR04710 | CakTC28501 | (AG)11gtttgatttgagaaatgagacagtga<br>tctgagctgaaacagtgggaataaagtgaggg<br>a(AG)10(GA)6                                | 358  | 471  | -- | --       |  |  |  |  |
| CakTcSSR04711 | CakTC28520 | tattcatgctagtattgaaatctcaagtactactc<br>cacgatgacctaacatcatcatctcgtag(TG<br>T)5                                      | 1172 | 1302 | -- | Trihelix |  |  |  |  |
| CakTcSSR04712 | CakTC28629 | (AG)12(TG)13                                                                                                        | 1113 | 1162 | -- | --       |  |  |  |  |
| CakTcSSR04713 | CakTC28643 | (TCT)7tcgcgct(TC)8                                                                                                  | 164  | 207  | -- | --       |  |  |  |  |
| CakTcSSR04714 | CakTC28711 | (TTC)5ttgtcttttggctcaacg(AC)7                                                                                       | 4128 | 4176 | -- | FHA      |  |  |  |  |
| CakTcSSR04715 | CakTC28712 | (TCT)5tcattcc(TCT)5                                                                                                 | 298  | 333  | -- | --       |  |  |  |  |
| CakTcSSR04716 | CakTC28798 | (TAA)5tag(TAA)6                                                                                                     | 792  | 827  | -- | C3H      |  |  |  |  |
| CakTcSSR04717 | CakTC28832 | (AG)11atgggttttt(AG)6atgggttttt(<br>AG)9                                                                            | 507  | 580  | -- | --       |  |  |  |  |
| CakTcSSR04718 | CakTC28892 | (AG)11atgagagagatgaggtagtattatt<br>atagggagaagaaaa(AG)13                                                            | 2021 | 2110 | -- | --       |  |  |  |  |
| CakTcSSR04719 | CakTC29049 | (TC)9ttatcttgttcttgtgtgtgtctgtgc<br>cttctg(TC)8                                                                     | 3    | 74   | -- | TCP      |  |  |  |  |

|               |            |                                                                                                                                                                                                    |      |      |            |       |  |  |  |
|---------------|------------|----------------------------------------------------------------------------------------------------------------------------------------------------------------------------------------------------|------|------|------------|-------|--|--|--|
| CakTcSSR04720 | CakTC29049 | (CAA)5gaatcatcttctctcttcaa(ATTCTC)5atcaacaacaccttggtccctttgattggaagaccacccctttcattatgggtccatctccatccaacaaccttcttcaaac(TCT)5                                                                        | 339  | 506  | --         | TCP   |  |  |  |
| CakTcSSR04721 | CakTC29191 | (CT)11tcctgtaatatgttgtgtgtgtgtctttctt(AG)7                                                                                                                                                         | 8    | 79   | --         | --    |  |  |  |
| CakTcSSR04722 | CakTC29198 | (TGT)5(TTC)5                                                                                                                                                                                       | 1569 | 1598 | --         | --    |  |  |  |
| CakTcSSR04723 | CakTC29368 | (TTC)5tttctctcgagtaacacgcaagtcaata(TTC)5                                                                                                                                                           | 76   | 133  | --         | --    |  |  |  |
| CakTcSSR04724 | CakTC29433 | (AAT)9atatgtttaccaatgctacatcatggaataatgaagc(AAG)6                                                                                                                                                  | 918  | 1002 | --         | C2H2  |  |  |  |
| CakTcSSR04725 | CakTC29478 | (CTT)5ccttcttctgctgctctctcaa(TCT)6                                                                                                                                                                 | 30   | 84   | --         | --    |  |  |  |
| CakTcSSR04726 | CakTC29478 | (CAT)5ccaatttggaatttcatac(CCT)8                                                                                                                                                                    | 535  | 593  | --         | --    |  |  |  |
| CakTcSSR04727 | CakTC29579 | (TCT)6(TCTCAA)5*                                                                                                                                                                                   | 427  | 471  | --         | GRF   |  |  |  |
| CakTcSSR04728 | CakTC29683 | (TTG)6gaacatcat(TTG)7                                                                                                                                                                              | 254  | 301  | Flower bud | --    |  |  |  |
| CakTcSSR04729 | CakTC29805 | (AG)11aaa(AG)9                                                                                                                                                                                     | 504  | 546  | Shoot      | zf-HD |  |  |  |
| CakTcSSR04730 | CakTC29903 | (CT)8ccactttctctctacaaaattcctttacaacaactgaagtaaagaac(CT)9                                                                                                                                          | 8    | 89   | --         | --    |  |  |  |
| CakTcSSR04731 | CakTC29919 | (TTCT)5(TTC)6                                                                                                                                                                                      | 3    | 36   | --         | --    |  |  |  |
| CakTcSSR04732 | CakTC30069 | (TTG)7agggataagaatggattatcatggttgaaagt(TGA)5                                                                                                                                                       | 919  | 988  | --         | bHLH  |  |  |  |
| CakTcSSR04733 | CakTC30217 | (CAA)7cctcaaa(AAC)5                                                                                                                                                                                | 962  | 1004 | --         | --    |  |  |  |
| CakTcSSR04734 | CakTC30271 | (TAA)6ttatg(TA)8                                                                                                                                                                                   | 1521 | 1559 | --         | --    |  |  |  |
| CakTcSSR04735 | CakTC30341 | (TA)6(TG)10                                                                                                                                                                                        | 1385 | 1416 | --         | --    |  |  |  |
| CakTcSSR04736 | CakTC30431 | (ATT)8aacaatcaaatgctt(TGA)5                                                                                                                                                                        | 2161 | 2214 | Young_pod  | --    |  |  |  |
| CakTcSSR04737 | CakTC30473 | (TAA)6ccaagttgttgaagaaattgttaataaa(AAT)7                                                                                                                                                           | 2059 | 2125 | --         | --    |  |  |  |
| CakTcSSR04738 | CakTC30523 | (AG)6aaaagagatggaattgtgtgtttgatta<br>aaagggaagggttttaggggaatattagaggga<br>agagccactggt(AG)6atagtggaagaggc<br>agaggttggtttgtcgggtaataaagcagtc<br>ggaaggaggatc(AG)6aaaagaaattgtgttt<br>gtttttgt(AG)8 | 3664 | 3870 | --         | --    |  |  |  |
| CakTcSSR04739 | CakTC30591 | (TC)8tactactactcatggcttctctcaaaaa<br>cctttctctctacattcccatgttca(TCT)7                                                                                                                              | 34   | 128  | --         | --    |  |  |  |
| CakTcSSR04740 | CakTC30664 | (TCC)5acctctccaggactaataccaagcc<br>ccaacgggtggtgcctaggcctct(CCA)<br>5                                                                                                                              | 1557 | 1638 | --         | --    |  |  |  |

|               |            |                                                                                                                                                                                            |      |      |       |           |  |  |  |
|---------------|------------|--------------------------------------------------------------------------------------------------------------------------------------------------------------------------------------------|------|------|-------|-----------|--|--|--|
| CakTcSSR04741 | CakTC30694 | (CT)11cactcatagaatgttcttgcactata<br>ctactaccaatgttattgtgtctgttga(AAG<br>)6                                                                                                                 | 17   | 113  | --    | --        |  |  |  |
| CakTcSSR04742 | CakTC30698 | (TAT)5atatccatt(CATA)5cacacctct<br>taac(CT)6                                                                                                                                               | 175  | 243  | --    | --        |  |  |  |
| CakTcSSR04743 | CakTC30702 | (GAA)5gan(AGA)5(AG)28*                                                                                                                                                                     | 1749 | 1834 | --    | --        |  |  |  |
| CakTcSSR04744 | CakTC30707 | (TGT)7ctatgttgagtggtgaagagagag<br>gagaataatgatgggtgtgttgagataaag<br>gggtgtga(TGT)6                                                                                                         | 914  | 1018 | --    | MYB       |  |  |  |
| CakTcSSR04745 | CakTC30748 | (TC)12acgctcacccgtgtttgtgttaata<br>atcttcttctctattttattc(CT)6                                                                                                                              | 46   | 131  | --    | AP2-EREBP |  |  |  |
| CakTcSSR04746 | CakTC30797 | (TTTC)6tcag(CT)9                                                                                                                                                                           | 17   | 62   | --    | --        |  |  |  |
| CakTcSSR04747 | CakTC30832 | (ATG)6agaacaggaacagaatcaataatc<br>atttgtgaatgagaagcattaactccaccaacta<br>c(TTG)7                                                                                                            | 353  | 451  | --    | ABI3VP1   |  |  |  |
| CakTcSSR04748 | CakTC30832 | (TTC)7aaattcttcttttgatgggtgtga<br>tgataa(CTT)6                                                                                                                                             | 1392 | 1465 | --    | ABI3VP1   |  |  |  |
| CakTcSSR04749 | CakTC30906 | (CAA)5ctactttagctgcaggtac(TAA)<br>7                                                                                                                                                        | 426  | 480  | --    | GRAS      |  |  |  |
| CakTcSSR04750 | CakTC30911 | (AG)14acattgaacaaatagcaattttgtt<br>aaatgggtttgtaacttgtcgttaaaatgcaga<br>agcacgggtgagaacagagaattcaagagag<br>ag(GAA)6                                                                        | 2400 | 2541 | --    | --        |  |  |  |
| CakTcSSR04751 | CakTC30925 | (ATA)6atgatg(ATA)9                                                                                                                                                                         | 2177 | 2227 | --    | --        |  |  |  |
| CakTcSSR04752 | CakTC30932 | (AT)7aacaactg(TTC)5                                                                                                                                                                        | 43   | 80   | --    | --        |  |  |  |
| CakTcSSR04753 | CakTC30961 | (CT)7ttcttctcatcaatatatttattcttct<br>tcttatttcagtaactaatggaatggatgaca(<br>ATC)6                                                                                                            | 160  | 256  | --    | Trihelix  |  |  |  |
| CakTcSSR04754 | CakTC30961 | (TGA)7aaacgatcactcatagcactgag<br>ggactgaaagagaatgaatgttccatggagaa<br>gaagaaaaaggagcgggtgagtg(GAA)5                                                                                         | 933  | 1048 | --    | Trihelix  |  |  |  |
| CakTcSSR04755 | CakTC31110 | (CAA)5ctaccctctcttcaatagaaactag<br>(TAA)5tagtaataataacaacg(ATA)5                                                                                                                           | 407  | 494  | Shoot | AP2-EREBP |  |  |  |
| CakTcSSR04756 | CakTC31179 | (GGT)5gatgcatatgagattccaacaacag<br>gtggcaatggccctcatatacaggagta(GG<br>T)6gaattgtattgaat(TGG)5gaatagac<br>tggtgctggcgggtggtgatatactggtgg<br>tggtgatggagatgggtgggtgataaggtgt<br>ttgggt(GTG)5 | 652  | 862  | --    | --        |  |  |  |

|               |            |                                                                                                        |      |      |            |      |  |  |  |
|---------------|------------|--------------------------------------------------------------------------------------------------------|------|------|------------|------|--|--|--|
| CakTcSSR04757 | CakTC31182 | (TAT)5tggttaattactataagttgtattttgggttcgcgata(ATG)5                                                     | 2799 | 2866 | --         | --   |  |  |  |
| CakTcSSR04758 | CakTC31228 | (GAA)5gttgtgaaccctataaactacactcgattagatttactaactcatcattttttgctacatattt(GA)35                           | 3106 | 3259 | --         | CPP  |  |  |  |
| CakTcSSR04759 | CakTC31402 | (GA)10ggagtaggagagaaaacgcagatgctcaccagatagagaagtgagttgttgccacc(GA)7                                    | 2292 | 2381 | --         | --   |  |  |  |
| CakTcSSR04760 | CakTC31481 | ggaggaggagggaagtagaagaagttgaagaaagaagaaggaggag(GAA)9gaggaggtg(GAA)5gaggtggg(GAA)5gaggtg                | 252  | 464  | --         | C3H  |  |  |  |
| CakTcSSR04761 | CakTC31534 | (GA)9gtgattcccactgcacttgacttggtcatcga(TTC)9                                                            | 2824 | 2902 | --         | --   |  |  |  |
| CakTcSSR04762 | CakTC31555 | (AG)8aaaaaacaagaag(AC)6                                                                                | 105  | 145  | --         | --   |  |  |  |
| CakTcSSR04763 | CakTC31669 | (AT)10tcattctcat(TC)7                                                                                  | 138  | 180  | --         | --   |  |  |  |
| CakTcSSR04764 | CakTC31990 | (TC)8t(TC)6                                                                                            | 5    | 33   | --         | --   |  |  |  |
| CakTcSSR04765 | CakTC32025 | (TCT)5tcgtgttcttctatttgttcagatgaagaagctgctgtgatgatgttgaac(CTT)6                                        | 1648 | 1732 | --         | GeBP |  |  |  |
| CakTcSSR04766 | CakTC32072 | (GAA)6aacgacgaa(GAT)6                                                                                  | 392  | 436  | --         | --   |  |  |  |
| CakTcSSR04767 | CakTC32074 | (TTC)12ctcattccaattctcaattcttctatctctca(ATCT)5                                                         | 1140 | 1230 | --         | --   |  |  |  |
| CakTcSSR04768 | CakTC32122 | (CT)6aaaaa(TC)6                                                                                        | 2072 | 2100 | --         | WRKY |  |  |  |
| CakTcSSR04769 | CakTC32123 | (TTA)5ttttctcaactcttgaaaactagatgaaccagaattaattatcagaacactcccaaatgat(TAC)5                              | 1104 | 1200 | Root       | bHLH |  |  |  |
| CakTcSSR04770 | CakTC32157 | (AC)6atcata(AT)7                                                                                       | 990  | 1021 | --         | TCP  |  |  |  |
| CakTcSSR04771 | CakTC32204 | (AG)6cac(AG)7                                                                                          | 1528 | 1556 | --         | --   |  |  |  |
| CakTcSSR04772 | CakTC32348 | (CT)10gtctctctg(TC)8                                                                                   | 49   | 93   | --         | --   |  |  |  |
| CakTcSSR04773 | CakTC32409 | (TGT)5(TGG)5                                                                                           | 350  | 379  | --         | --   |  |  |  |
| CakTcSSR04774 | CakTC32412 | (ATT)9agtaacattt(TTA)7                                                                                 | 952  | 1009 | --         | --   |  |  |  |
| CakTcSSR04775 | CakTC32521 | (TTC)5(ATC)5atattcttcttctttgttgcgtgttggttcttcagaagcatcgtcatattcggtgcagtgaactctaagtcgaagaaaggacct(TCG)5 | 598  | 730  | --         | --   |  |  |  |
| CakTcSSR04776 | CakTC32692 | (AAC)5aattaaccacaacttcagtactagactacttcatttatttcattcac(GTT)5                                            | 166  | 244  | --         | --   |  |  |  |
| CakTcSSR04777 | CakTC32792 | (GTT)7gacgaatcagttttgatgggggtaaggggttccgagatgaaccatctcagcaaccaacatgaaaaggttgacacataaagaagaaagagg(AGA)5 | 298  | 429  | Flower bud | --   |  |  |  |

|               |            |                                                                                                                                                                                           |      |      |    |          |  |  |  |
|---------------|------------|-------------------------------------------------------------------------------------------------------------------------------------------------------------------------------------------|------|------|----|----------|--|--|--|
| CakTcSSR04778 | CakTC32806 | (GAA)7gaggggtgtggtggcgtggc(GA)<br>6agagtaattcctctctttgcggccatccgata<br>aagtcggaagatactaataatacaaaaataaaa<br>gacccaattatacaatacaatattaaattac(AT<br>T)8                                     | 1    | 173  | -- | --       |  |  |  |
| CakTcSSR04779 | CakTC32951 | (AG)16atttgttgggtttgtagatg(GA<br>A)6agcgtatggatggccttttgatttgaggga<br>gtt(GA)7                                                                                                            | 1    | 120  | -- | --       |  |  |  |
| CakTcSSR04780 | CakTC32975 | (GAG)8gaagag(GAA)8                                                                                                                                                                        | 498  | 551  | -- | --       |  |  |  |
| CakTcSSR04781 | CakTC33002 | (AG)6aaagaga(GT)6                                                                                                                                                                         | 44   | 74   | -- | HB       |  |  |  |
| CakTcSSR04782 | CakTC33002 | (CAA)6ccacaaacgtcaacaattacaggta<br>attcagaaaacaacaacaattggtatgtaacc<br>ataccaacaac(CAA)5                                                                                                  | 593  | 694  | -- | HB       |  |  |  |
| CakTcSSR04783 | CakTC33080 | (GA)7gggggg(GA)6                                                                                                                                                                          | 2890 | 2921 | -- | --       |  |  |  |
| CakTcSSR04784 | CakTC33139 | (CCA)5ccccctccagatccgctttcttcttc<br>ttcacatctatcttccccaaaagcaacaccaa<br>actaacat(TC)6ccattttcaacaacaaaaa<br>ctcattagtctctgctccctcaaaatctcctcc<br>ctctcaaaatccccaccgcaccatcctcat(<br>AAC)6 | 88   | 289  | -- | --       |  |  |  |
| CakTcSSR04785 | CakTC33193 | (GGT)5ggaggctgatatgaatttccggcg<br>gaggaggaggtggtggtggagggtatggata<br>gtaattcgaagggtgt(GGA)5                                                                                               | 1845 | 1946 | -- | --       |  |  |  |
| CakTcSSR04786 | CakTC33220 | (TTA)5tg(ATT)5                                                                                                                                                                            | 1978 | 2009 | -- | --       |  |  |  |
| CakTcSSR04787 | CakTC33270 | (AAC)5tcttctcttcatatcacctccaaat<br>caaacccttcttctcatggcgtttacttcatgaa<br>aatcaacaatgtgaaaaaac(AGA)6a<br>c(AAG)5                                                                           | 431  | 566  | -- | --       |  |  |  |
| CakTcSSR04788 | CakTC33404 | (TA)9tttataatacactcatctagtgaagaag<br>aagggttttagttatatattttatatataagagttg<br>agctgc(TA)9                                                                                                  | 104  | 211  | -- | --       |  |  |  |
| CakTcSSR04789 | CakTC33404 | (ATC)8aacatgcacgtgctgttttagtaac<br>atgccttctatggaacaatgctgctgcaccat<br>cgctctttt(GGA)5                                                                                                    | 1695 | 1801 | -- | --       |  |  |  |
| CakTcSSR04790 | CakTC33456 | (TAA)6caac(AAT)7tacgtaagagttta<br>tcggtttgtactgaactgaagagcttt(ATA)<br>10                                                                                                                  | 627  | 742  | -- | Trihelix |  |  |  |
| CakTcSSR04791 | CakTC33599 | (TTC)16(TAC)5                                                                                                                                                                             | 97   | 159  | -- | --       |  |  |  |
| CakTcSSR04792 | CakTC33616 | (CT)9acttatttcaactgcaccttttatcatca<br>(TCT)5                                                                                                                                              | 7    | 69   | -- | C2C2-Dof |  |  |  |
| CakTcSSR04793 | CakTC33642 | (ATA)7acgatacattacaacaacaacaac(<br>CT)15                                                                                                                                                  | 173  | 247  | -- | --       |  |  |  |

|               |            |                                                                                                                                                                   |      |      |            |       |  |  |  |
|---------------|------------|-------------------------------------------------------------------------------------------------------------------------------------------------------------------|------|------|------------|-------|--|--|--|
| CakTcSSR04794 | CakTC33755 | (AG)7attaacgtgaagctgaagagaggtg<br>gtagttgaaaaaagaattgaaatgaagaataca<br>aaggtctagaaatatagagaaaatggtt(GA)<br>10                                                     | 2273 | 2393 | --         | --    |  |  |  |
| CakTcSSR04795 | CakTC33803 | (CAT)5(AAT)6                                                                                                                                                      | 510  | 542  | --         | --    |  |  |  |
| CakTcSSR04796 | CakTC33825 | (TAA)35ataataataaac(AAT)5                                                                                                                                         | 1    | 132  | --         | --    |  |  |  |
| CakTcSSR04797 | CakTC33883 | (TTA)7tcggatggtaagggaagatggtgt<br>cttgtgatattcatggagaatgagaattgaggg<br>atcaaaatcatggataataagaggtcttct(TT<br>C)5                                                   | 1751 | 1875 | --         | --    |  |  |  |
| CakTcSSR04798 | CakTC33929 | (TC)19tgaattctctcccagcaacaacct<br>ttctctctctctaaatgtaaatatcattttctactctt<br>ttcaaaatatctctct(TC)7                                                                 | 1    | 133  | --         | --    |  |  |  |
| CakTcSSR04799 | CakTC34098 | (AGA)5gaggaca(AAG)7                                                                                                                                               | 2383 | 2425 | --         | --    |  |  |  |
| CakTcSSR04800 | CakTC34364 | (AG)6(AGA)6*                                                                                                                                                      | 1967 | 1994 | --         | --    |  |  |  |
| CakTcSSR04801 | CakTC34378 | (AAT)5(ATT)5                                                                                                                                                      | 6684 | 6713 | --         | --    |  |  |  |
| CakTcSSR04802 | CakTC34449 | (CTT)8ctcactttgatacatctctttctac<br>cctctctgcatcaccacaaaacntg(ATC)<br>5                                                                                            | 559  | 653  | --         | --    |  |  |  |
| CakTcSSR04803 | CakTC34534 | (AG)6aagaagaaaaagaagagagcaaa<br>gtttcaacaacaaaaacaaaaacaaag<br>agaaagaa(AG)6                                                                                      | 33   | 120  | --         | --    |  |  |  |
| CakTcSSR04804 | CakTC34716 | (AATA)6ttaataaaaaaatggaacaggttg<br>tgttcgacggtggaagaatggattatggaatgg<br>tttgttttagggatagagaagagaggaat(G<br>A)7aagagatcgggattgtgattttgcggtgg<br>tggaaaggagaa(AG)12 | 3530 | 3721 | --         | --    |  |  |  |
| CakTcSSR04805 | CakTC34751 | (AG)6aagagagaga(AG)7                                                                                                                                              | 3487 | 3522 | --         | --    |  |  |  |
| CakTcSSR04806 | CakTC34772 | (CT)9ttctctct(TC)7                                                                                                                                                | 28   | 68   | --         | --    |  |  |  |
| CakTcSSR04807 | CakTC34839 | (GA)7a(AG)9                                                                                                                                                       | 3    | 35   | --         | --    |  |  |  |
| CakTcSSR04808 | CakTC34908 | (AAG)5aacgaaacgcattttttgagtatgt<br>atggaagaaaaatgagtgaataatgcaactata<br>ctccaa(AAC)5                                                                              | 3586 | 3681 | --         | --    |  |  |  |
| CakTcSSR04809 | CakTC34926 | (AC)6tctg(AC)6                                                                                                                                                    | 26   | 53   | --         | --    |  |  |  |
| CakTcSSR04810 | CakTC34963 | (TC)6ttcaactctcagcttcaacactcgaact<br>tcattcgcgtgtttcgcgacgaagaaaaaccaag<br>aacgtaa(TC)8                                                                           | 78   | 174  | --         | --    |  |  |  |
| CakTcSSR04811 | CakTC34982 | (GAG)6gatttggaaaaggaggtggt(GG<br>A)5                                                                                                                              | 370  | 422  | --         | --    |  |  |  |
| CakTcSSR04812 | CakTC35028 | (GTG)5aaaac(CAA)6                                                                                                                                                 | 341  | 378  | --         | zf-HD |  |  |  |
| CakTcSSR04813 | CakTC35085 | (AAT)5acaaac(AAT)5                                                                                                                                                | 2540 | 2575 | Flower bud | --    |  |  |  |

|               |            |                                                                                                                                    |      |      |    |         |  |  |  |  |
|---------------|------------|------------------------------------------------------------------------------------------------------------------------------------|------|------|----|---------|--|--|--|--|
| CakTcSSR04814 | CakTC35135 | (AG)7aaaagaagaagcagaaga(AG)7a<br>agaagaagcagaaga(AG)6                                                                              | 28   | 101  | -- | --      |  |  |  |  |
| CakTcSSR04815 | CakTC35166 | (GAT)6gggtgactggaata(ATG)5                                                                                                         | 3171 | 3216 | -- | --      |  |  |  |  |
| CakTcSSR04816 | CakTC35203 | (TAC)5tagcagctttcgaaaacgcacatagt<br>aatagccaactaggcaaccacattcagttgect<br>aaaataaatcaacaacaagaagatcttct(TT<br>C)6                   | 126  | 247  | -- | --      |  |  |  |  |
| CakTcSSR04817 | CakTC35205 | (GAA)6(GAT)7                                                                                                                       | 2767 | 2805 | -- | --      |  |  |  |  |
| CakTcSSR04818 | CakTC35382 | (TTC)7acatttttctacaataacttctctttgctt<br>tggtgtcttgatg(TC)10                                                                        | 22   | 108  | -- | --      |  |  |  |  |
| CakTcSSR04819 | CakTC35566 | (CT)9(AT)9                                                                                                                         | 20   | 55   | -- | --      |  |  |  |  |
| CakTcSSR04820 | CakTC35566 | (CAG)6caacagcaacaccaacaacagca<br>gcagcaacagcaacaa(CAG)5                                                                            | 978  | 1049 | -- | --      |  |  |  |  |
| CakTcSSR04821 | CakTC35622 | (AC)8gcac(AT)6                                                                                                                     | 25   | 56   | -- | --      |  |  |  |  |
| CakTcSSR04822 | CakTC35713 | (AG)7at(AG)18                                                                                                                      | 167  | 218  | -- | --      |  |  |  |  |
| CakTcSSR04823 | CakTC35890 | (CT)6cattcatttataattatctcactctcaca<br>actcttctcttctatctctta(CT)8                                                                   | 134  | 214  | -- | --      |  |  |  |  |
| CakTcSSR04824 | CakTC35946 | (CT)8ccaaaa(TC)8                                                                                                                   | 49   | 86   | -- | ABI3VP1 |  |  |  |  |
| CakTcSSR04825 | CakTC36098 | (TC)7atcttctgactctcttctctatctatctt<br>ataccctctccaatttgcaaacctacc(CT)7                                                             | 4    | 91   | -- | --      |  |  |  |  |
| CakTcSSR04826 | CakTC36098 | (CAG)5acagaacgacttcagcagcagaca<br>gaacgactt(CAG)5                                                                                  | 2808 | 2870 | -- | --      |  |  |  |  |
| CakTcSSR04827 | CakTC36187 | (TTC)5tagtc(ATTTTA)6                                                                                                               | 28   | 83   | -- | --      |  |  |  |  |
| CakTcSSR04828 | CakTC36231 | (TTA)5tg(ATT)6                                                                                                                     | 484  | 518  | -- | --      |  |  |  |  |
| CakTcSSR04829 | CakTC36239 | (CCT)5ccacett(CAC)5                                                                                                                | 76   | 112  | -- | --      |  |  |  |  |
| CakTcSSR04830 | CakTC36265 | (TGA)5tggtggtgatagtgaagg(TGA)6                                                                                                     | 487  | 537  | -- | --      |  |  |  |  |
| CakTcSSR04831 | CakTC36298 | (AC)11tatgtgagttttattttacgatcgatt<br>ggggtttctctt(TC)6                                                                             | 53   | 129  | -- | --      |  |  |  |  |
| CakTcSSR04832 | CakTC36298 | (AAC)5gtttcagatgacttagtgtctgtgaga<br>atgaggaaagacgagacgaaacagttaattc<br>gtgga(GCG)5                                                | 338  | 431  | -- | --      |  |  |  |  |
| CakTcSSR04833 | CakTC36467 | (TTCAAT)8ttcagtttt(AATTTTC)5                                                                                                       | 76   | 162  | -- | --      |  |  |  |  |
| CakTcSSR04834 | CakTC36610 | (TGG)5agaagttgccggtgacggtgttttcg<br>atggt(GGA)6gaaagagaaggggaagga<br>ggaggagttacaggtactgttgaggaggagg<br>a(GAT)10gaaggaggagga(GAT)7 | 2070 | 2247 | -- | --      |  |  |  |  |
| CakTcSSR04835 | CakTC36652 | (CAG)7(CAA)5                                                                                                                       | 2552 | 2587 | -- | ARF     |  |  |  |  |

|               |            |                                                                                                                                   |      |      |    |      |  |  |  |  |
|---------------|------------|-----------------------------------------------------------------------------------------------------------------------------------|------|------|----|------|--|--|--|--|
| CakTcSSR04836 | CakTC36776 | (TC)6tagaacagagcataaagtatctctactct(AGA)5                                                                                          | 135  | 191  | -- | --   |  |  |  |  |
| CakTcSSR04837 | CakTC36961 | (TC)16ta(TC)12                                                                                                                    | 1    | 58   | -- | --   |  |  |  |  |
| CakTcSSR04838 | CakTC37049 | (TCT)7tt(TTC)5                                                                                                                    | 166  | 203  | -- | --   |  |  |  |  |
| CakTcSSR04839 | CakTC37058 | (TC)7ttctctctctcactaattaacaa(TAT)6                                                                                                | 14   | 72   | -- | --   |  |  |  |  |
| CakTcSSR04840 | CakTC37126 | (CT)8actttgaaaaacaacagcactt(TC)10                                                                                                 | 1066 | 1124 | -- | --   |  |  |  |  |
| CakTcSSR04841 | CakTC37567 | (AG)6aatgttttt(GA)7                                                                                                               | 1151 | 1185 | -- | --   |  |  |  |  |
| CakTcSSR04842 | CakTC37593 | (CAG)6(CAT)5                                                                                                                      | 1803 | 1835 | -- | --   |  |  |  |  |
| CakTcSSR04843 | CakTC37599 | (CA)6ctt(TC)7                                                                                                                     | 1790 | 1818 | -- | --   |  |  |  |  |
| CakTcSSR04844 | CakTC37613 | (AGAA)8(AG)6                                                                                                                      | 1181 | 1224 | -- | --   |  |  |  |  |
| CakTcSSR04845 | CakTC37753 | (CT)7ttctccactctctctctttaatctttttctctctttccatggctaagag(AAT)7                                                                      | 1    | 89   | -- | WRKY |  |  |  |  |
| CakTcSSR04846 | CakTC37782 | (GA)8caaaggggtatcatatcataactaaaataataactaagtattgatataaatagttatttagtggttgagattcaactaagaaggggatat(GCA)5                             | 189  | 311  | -- | --   |  |  |  |  |
| CakTcSSR04847 | CakTC37802 | (GA)7ttgttttagtttgagga(AAG)5                                                                                                      | 1728 | 1773 | -- | --   |  |  |  |  |
| CakTcSSR04848 | CakTC37924 | (TC)7cctcctctgccttcttcttcatca(TC)7                                                                                                | 140  | 191  | -- | --   |  |  |  |  |
| CakTcSSR04849 | CakTC38053 | (TGT)5gaggttga(ATTTC)5                                                                                                            | 1438 | 1490 | -- | --   |  |  |  |  |
| CakTcSSR04850 | CakTC38061 | (CT)9t(TC)7                                                                                                                       | 1057 | 1089 | -- | --   |  |  |  |  |
| CakTcSSR04851 | CakTC38076 | (ACA)5ctcctggttaggttactattttatggaacaat(AAC)5                                                                                      | 284  | 345  | -- | HB   |  |  |  |  |
| CakTcSSR04852 | CakTC38133 | (CT)11tcaaacttatactttctttccctccccaacacacacacact(TC)6                                                                              | 1    | 81   | -- | --   |  |  |  |  |
| CakTcSSR04853 | CakTC38162 | (GAT)7(GATGAA)5                                                                                                                   | 284  | 331  | -- | --   |  |  |  |  |
| CakTcSSR04854 | CakTC38180 | (TGT)5tcctgaagataaggttggtcgaaggagagacatagagactgtacaaccattctctctttgtaactctttctact(TC)7                                             | 905  | 1012 | -- | --   |  |  |  |  |
| CakTcSSR04855 | CakTC38220 | (GAA)5(GAT)5                                                                                                                      | 414  | 443  | -- | --   |  |  |  |  |
| CakTcSSR04856 | CakTC38533 | (GAA)5tttgggtggtgttataaacctagcagcacttgagttgtgtgtgttccatgttgagataagaagccattgatgatgatgata(ATG)7tgaatctatagtttatgaatggatgtgtgt(TGA)5 | 478  | 645  | -- | --   |  |  |  |  |
| CakTcSSR04857 | CakTC38541 | (ACA)5acgcttcaggacacacctgaggatatattatattgtaataatcattatt(TTA)5                                                                     | 227  | 307  | -- | --   |  |  |  |  |

|               |            |                                                                                                                                                                                       |      |      |       |                    |  |  |  |
|---------------|------------|---------------------------------------------------------------------------------------------------------------------------------------------------------------------------------------|------|------|-------|--------------------|--|--|--|
| CakTcSSR04858 | CakTC38713 | (CCA)7cctcagagtcagacccatcacccct<br>tctactattccaatccaattgctacaccaattat<br>gtcaatcgacttcaataccatccttactatccca<br>at(CAA)7                                                               | 268  | 405  | --    | --                 |  |  |  |
| CakTcSSR04859 | CakTC38718 | (TGA)5(TGG)5                                                                                                                                                                          | 1299 | 1328 | --    | --                 |  |  |  |
| CakTcSSR04860 | CakTC38743 | (CAA)8atgaatttacctcttcaacaagtaggt<br>gttggaatgagcatgggaagtgggagcagc(<br>AAT)11                                                                                                        | 1095 | 1208 | --    | HB                 |  |  |  |
| CakTcSSR04861 | CakTC38761 | (AG)9aaaga(AG)8                                                                                                                                                                       | 1387 | 1425 | --    | bHLH               |  |  |  |
| CakTcSSR04862 | CakTC38866 | (GT)7gaatggagtctcaagcattcaatcaag<br>ttgatggagtagttgcagaggagagatttaaga<br>ttgagaagagagatttc(AG)10                                                                                      | 1790 | 1900 | --    | G2-like            |  |  |  |
| CakTcSSR04863 | CakTC38983 | (GAA)5agagtcgcaaaagagttttctagcttt<br>cagttttattgat(TC)8gtgactct(TTC)5<br>at(CAA)8                                                                                                     | 185  | 306  | --    | --                 |  |  |  |
| CakTcSSR04864 | CakTC38998 | (ACC)5gccaccacaaacctcaaatcagaat<br>caaaatcaaatt(CAAAAC)5ac(TAA)<br>8                                                                                                                  | 1384 | 1491 | --    | --                 |  |  |  |
| CakTcSSR04865 | CakTC39058 | (CT)6(CA)8                                                                                                                                                                            | 7    | 34   | --    | --                 |  |  |  |
| CakTcSSR04866 | CakTC39073 | (AGA)6tgatgatgatgaagatgtaataa<br>gaggaagaggagaaaaaagaagaccaaag<br>cgttccaatagtgt(GAA)6                                                                                                | 407  | 511  | --    | SWI/SNF-<br>BAF60b |  |  |  |
| CakTcSSR04867 | CakTC39121 | (GAA)5gagaaagagaaagacgttggtg<br>ctgcatcgag(TGA)8                                                                                                                                      | 1390 | 1463 | --    | --                 |  |  |  |
| CakTcSSR04868 | CakTC39483 | (TCA)9(TCT)5                                                                                                                                                                          | 152  | 193  | --    | --                 |  |  |  |
| CakTcSSR04869 | CakTC39564 | (AG)8t(GA)7                                                                                                                                                                           | 1256 | 1286 | --    | --                 |  |  |  |
| CakTcSSR04870 | CakTC39603 | (AG)7aagacaaaaagaacagttgct(G<br>A)11                                                                                                                                                  | 1632 | 1690 | Shoot | LUG                |  |  |  |
| CakTcSSR04871 | CakTC39665 | (TC)6ta(CT)12                                                                                                                                                                         | 770  | 807  | --    | --                 |  |  |  |
| CakTcSSR04872 | CakTC39703 | (AGAA)5aaaggattattggagaagtgtgt<br>ctttgagttatttgatttgaagaaaa(AG)12                                                                                                                    | 1114 | 1209 | --    | --                 |  |  |  |
| CakTcSSR04873 | CakTC39740 | (CCA)5cccttcagatccgctttcttcttc<br>ttcacatcctatcttccaaaaagcaacaccaa<br>actaacat(TC)6ccattttcaacaaacaaaa<br>ctcattagtctcgtccctcaaaatctcctcc<br>ctctcaaaatccccacgcaccatcctccat(<br>AAC)6 | 1328 | 1529 | --    | --                 |  |  |  |
| CakTcSSR04874 | CakTC39743 | (AG)11gtttatgaagatagagagaagagca<br>tggtgaatttaag(GA)10                                                                                                                                | 1234 | 1314 | --    | --                 |  |  |  |
| CakTcSSR04875 | CakTC39754 | (TAC)5(TAA)7                                                                                                                                                                          | 621  | 656  | --    | C2C2-Dof           |  |  |  |

|               |            |                                                                                                                                                                                                                       |      |      |    |          |  |  |  |
|---------------|------------|-----------------------------------------------------------------------------------------------------------------------------------------------------------------------------------------------------------------------|------|------|----|----------|--|--|--|
| CakTcSSR04876 | CakTC39754 | (TTA)5tggtatttagtaagcactagtttgatt<br>gaaaaaatgagttttagaattttgattgaaagga<br>atgagatgaagtgagtgagatataaaaatgc(<br>ATT)5                                                                                                  | 1300 | 1422 | -- | C2C2-Dof |  |  |  |
| CakTcSSR04877 | CakTC39789 | (TAC)5aacccaagaac(ATA)6                                                                                                                                                                                               | 56   | 99   | -- | --       |  |  |  |
| CakTcSSR04878 | CakTC39789 | (TGT)5(TGC)5                                                                                                                                                                                                          | 433  | 462  | -- | --       |  |  |  |
| CakTcSSR04879 | CakTC39789 | (ACC)6catcatcatttttgaaatccattattgt<br>tcatagcttgaacattatt(ACC)5acttattgg<br>tacagaaatacccttttaccctcactgttctgat<br>tattattgttattgtttt(CCA)6ctgtttttacc<br>ctctggtatgccaccgttattttgttacctccacc<br>atgattctgattatt(ACC)6 | 582  | 824  | -- | --       |  |  |  |
| CakTcSSR04880 | CakTC39897 | (GGT)6ggaaagtacgggtggttgatgggtg<br>gttggtgaagatggagcttgagaattagaagga<br>gattgtgtgagtggtgaagtaaaaca(CCT)<br>6                                                                                                          | 1390 | 1510 | -- | C2C2-Dof |  |  |  |
| CakTcSSR04881 | CakTC40096 | (TC)7acacta(CT)6                                                                                                                                                                                                      | 11   | 42   | -- | --       |  |  |  |
| CakTcSSR04882 | CakTC40184 | (TCT)7ttccctctt(CAA)5                                                                                                                                                                                                 | 19   | 63   | -- | --       |  |  |  |
| CakTcSSR04883 | CakTC40197 | (GA)7gttcgtgggttgccctgcctcgttact<br>tcgctgtcgtttcccgccaattattgccgtttt<br>actgtcttctcagaaattccttctctccctcc(C<br>T)17                                                                                                   | 30   | 175  | -- | --       |  |  |  |
| CakTcSSR04884 | CakTC40203 | (CT)8tgtttatcttaaagcctaagccgtaacc<br>gt(TTC)5(TC)8*                                                                                                                                                                   | 261  | 335  | -- | --       |  |  |  |
| CakTcSSR04885 | CakTC40260 | (TCT)6taagtctcatatggcatgtttaactc(<br>ACA)8                                                                                                                                                                            | 180  | 247  | -- | --       |  |  |  |
| CakTcSSR04886 | CakTC40287 | (TC)6(TA)6                                                                                                                                                                                                            | 833  | 856  | -- | --       |  |  |  |
| CakTcSSR04887 | CakTC40337 | (AG)7aaagagagagatt(AG)11                                                                                                                                                                                              | 40   | 88   | -- | --       |  |  |  |
| CakTcSSR04888 | CakTC40339 | (AG)6ttagagtt(AG)7aagttatgggtgtt<br>gccaatcctcgtgtcaaggttgagaggagga<br>gttagagatggagataataactaataataat(T<br>AA)8                                                                                                      | 98   | 234  | -- | --       |  |  |  |
| CakTcSSR04889 | CakTC40460 | (TCT)6tccctcttcttctcgtcctcttctcatct<br>tgttcttcgtattgttcttcacgtcgtcgtcgtcc(<br>TCT)5(TCA)5                                                                                                                            | 2299 | 2412 | -- | PHD      |  |  |  |
| CakTcSSR04890 | CakTC40509 | (CT)10(CA)7                                                                                                                                                                                                           | 6    | 39   | -- | --       |  |  |  |
| CakTcSSR04891 | CakTC40574 | (AG)8aaacacatatagataatcagagagata<br>ttttcacaattgtgtttgtgtgtat(CCA)6                                                                                                                                                   | 35   | 121  | -- | --       |  |  |  |
| CakTcSSR04892 | CakTC40574 | (CT)7(AT)9                                                                                                                                                                                                            | 364  | 395  | -- | --       |  |  |  |
| CakTcSSR04893 | CakTC40607 | (TC)21ttattactctatttttcat(TC)6                                                                                                                                                                                        | 3    | 77   | -- | --       |  |  |  |
| CakTcSSR04894 | CakTC40623 | (AAT)6(AAG)6                                                                                                                                                                                                          | 804  | 839  | -- | --       |  |  |  |

|               |            |                                                                                                         |      |      |             |     |  |  |  |  |
|---------------|------------|---------------------------------------------------------------------------------------------------------|------|------|-------------|-----|--|--|--|--|
| CakTcSSR04895 | CakTC40662 | (ATG)7gaaatgtaagggaaatgtgagtgtgaatgtctttgatttag(CAT)5                                                   | 783  | 861  | --          | --  |  |  |  |  |
| CakTcSSR04896 | CakTC40671 | (TCA)6tta(TGT)5                                                                                         | 294  | 329  | Mature Leaf | --  |  |  |  |  |
| CakTcSSR04897 | CakTC40671 | (AG)9atgtgtagtgggtgttattgaagagaggaagcgggaagaaaggaatgaaagggtgggtttatg(GA)7                               | 634  | 731  | Mature Leaf | --  |  |  |  |  |
| CakTcSSR04898 | CakTC40856 | (TC)7ttattctgttctctctctaaataattagacaacgcggataatttgaataggggaagttaaaggagcagtgatgaagctgttgggtggctatgc(CT)9 | 1872 | 2002 | --          | --  |  |  |  |  |
| CakTcSSR04899 | CakTC40875 | (AGA)6ggcgcgtgggtttgtgtatggttggttgtaatggattgtttaaacaagagaaatttgattcggcgcgtgaatcatactcttcattgtg(TTA)5    | 1470 | 1596 | --          | --  |  |  |  |  |
| CakTcSSR04900 | CakTC40893 | (GAA)16aggaaccctagatgaagagaa(AAG)12                                                                     | 1    | 106  | --          | --  |  |  |  |  |
| CakTcSSR04901 | CakTC41009 | (GAA)6aataagaagaggaggaagataatagagctgaccccagcatcaaaataatcatctttttatatatatagtattctttggaggtttgga(AG)11     | 1875 | 2005 | --          | --  |  |  |  |  |
| CakTcSSR04902 | CakTC41032 | (AG)8aatacacaaacactcacacacattctactcacttcattcgattcaaac(CTTT)5                                            | 1    | 88   | --          | --  |  |  |  |  |
| CakTcSSR04903 | CakTC41098 | (TC)8agagacgccatgtatcgccacatctacacggcccttctcttttcattctctccattccctctct(TCA)9                             | 93   | 201  | --          | --  |  |  |  |  |
| CakTcSSR04904 | CakTC41172 | (GTT)5(GGT)6                                                                                            | 1982 | 2014 | --          | --  |  |  |  |  |
| CakTcSSR04905 | CakTC41230 | (TCT)5gggttttttcttctacttctggttctctgatcttcttctctctctctggttcttcttgga(TCT)5gggtc(TTG)6                     | 1761 | 1879 | --          | --  |  |  |  |  |
| CakTcSSR04906 | CakTC41345 | (CT)7atctatctct(TC)8                                                                                    | 5    | 44   | Mature Leaf | --  |  |  |  |  |
| CakTcSSR04907 | CakTC41394 | (TTC)6tctgtattggagtgatggtgaattaatgattcttagctgaacttct(TGAACA)5                                           | 2387 | 2482 | --          | --  |  |  |  |  |
| CakTcSSR04908 | CakTC41516 | (TTTGAT)6tttgagaggta(TTG)7                                                                              | 772  | 840  | Flower bud  | GRF |  |  |  |  |
| CakTcSSR04909 | CakTC41712 | (ATA)5aaaataataatgtttgtttattagga(AG)6                                                                   | 652  | 705  | --          | --  |  |  |  |  |
| CakTcSSR04910 | CakTC41760 | (TC)10(AC)7                                                                                             | 76   | 109  | --          | --  |  |  |  |  |
| CakTcSSR04911 | CakTC41858 | (AAG)5ttaattcattcctgaaaatagaattagcgaattagatctcagaa(AG)6                                                 | 105  | 176  | --          | --  |  |  |  |  |
| CakTcSSR04912 | CakTC41965 | (GTT)6(GCT)7gttggtgttagaagacgttggtgatgataaagctgtgtgttgaaattgagattgggtgtttggtgtgctgaaaag(GTT)8           | 686  | 829  | --          | --  |  |  |  |  |

|               |            |                                                                                                                  |      |      |    |           |  |  |  |  |
|---------------|------------|------------------------------------------------------------------------------------------------------------------|------|------|----|-----------|--|--|--|--|
| CakTcSSR04913 | CakTC42004 | (TC)16ttttcgcatttcttagcatatcttaaac<br>tccaattccatttccggtgctagat(AGAA)5                                           | 21   | 126  | -- | --        |  |  |  |  |
| CakTcSSR04914 | CakTC42011 | (GAA)5ttagaagag(GAA)6                                                                                            | 765  | 806  | -- | --        |  |  |  |  |
| CakTcSSR04915 | CakTC42022 | (TC)7ttcaatgccgcccatgcctatcagaat<br>gaactagagagagagtgaacattcagagac<br>gaactaaga(AT)8acacacat(AG)8                | 42   | 164  | -- | --        |  |  |  |  |
| CakTcSSR04916 | CakTC42042 | (TC)8tatagcattgtagtggtgtggacctct<br>ttgctttgctgtcttttgagttccccattgtgggct<br>ttaatgggggttgctctctttgagcttatt(ATA)5 | 4    | 129  | -- | --        |  |  |  |  |
| CakTcSSR04917 | CakTC42044 | (AAG)5atgataaaaatgat(GAA)5                                                                                       | 70   | 113  | -- | --        |  |  |  |  |
| CakTcSSR04918 | CakTC42080 | (AG)6aatgacgacaagaggtaatcaacaac<br>aaccaccgcaaccaaacgggaacagaggct<br>gagg(CAA)6                                  | 40   | 130  | -- | --        |  |  |  |  |
| CakTcSSR04919 | CakTC42137 | (GA)13tg(GAA)5                                                                                                   | 6    | 48   | -- | --        |  |  |  |  |
| CakTcSSR04920 | CakTC42169 | (TC)8tatcttgatttcgattttatgatttgaat<br>ccaagtatgagagtttgag(AGA)8                                                  | 772  | 861  | -- | --        |  |  |  |  |
| CakTcSSR04921 | CakTC42230 | (GT)6(GTGTG)6*                                                                                                   | 1708 | 1745 | -- | --        |  |  |  |  |
| CakTcSSR04922 | CakTC42413 | (TC)6taaac(CT)6                                                                                                  | 1740 | 1769 | -- | --        |  |  |  |  |
| CakTcSSR04923 | CakTC42460 | (TCAAAT)5gttaggaataagaagtggc<br>gcttttggtgt(TGG)5                                                                | 692  | 768  | -- | --        |  |  |  |  |
| CakTcSSR04924 | CakTC42506 | (CTT)6cgtcttctccgccaatcgaggatact<br>cctccgggtgaattctcaa(CCT)5                                                    | 601  | 677  | -- | --        |  |  |  |  |
| CakTcSSR04925 | CakTC42582 | (AG)7aaagagagac(AG)9                                                                                             | 985  | 1026 | -- | --        |  |  |  |  |
| CakTcSSR04926 | CakTC42755 | (TGT)5tgctgctgg(TGT)6                                                                                            | 175  | 216  | -- | C2H2      |  |  |  |  |
| CakTcSSR04927 | CakTC42832 | (CAA)6aaggtgctaattatccacttgccatt<br>atcaagagaataacatcat(CAA)5                                                    | 1470 | 1548 | -- | --        |  |  |  |  |
| CakTcSSR04928 | CakTC43142 | (TC)6(GAT)5                                                                                                      | 1838 | 1864 | -- | --        |  |  |  |  |
| CakTcSSR04929 | CakTC43256 | (GAA)6atagtagtagt(ACA)5                                                                                          | 433  | 476  | -- | --        |  |  |  |  |
| CakTcSSR04930 | CakTC43356 | (GAA)5aaaaacccaataacaattttaattt<br>ttcttttttcccatcttggg(TC)6                                                     | 887  | 961  | -- | zf-HD     |  |  |  |  |
| CakTcSSR04931 | CakTC43377 | (CT)6ttaacaaaaaaaaataaaaaacaa<br>a(AG)9                                                                          | 108  | 165  | -- | AP2-EREBP |  |  |  |  |
