# Supplementary material
Source: publisher figshare collection journal article supplement (https://plos.figshare.com/articles/dataset/_/115291)
Supplement: Supplementary file 1 [file 1 › Table_S8.pdf]

**Table S8. List of polymorphic SSRs identified between kabuli and desi chickpea.**

| Kabuli SSR ID | Kabuli TC ID | SSR       | Start | End  | Desi SSR ID           | Desi TC ID | SSR       | Start | End  | Repeat unit size difference | Tissue specificity | TF family |
|---------------|--------------|-----------|-------|------|-----------------------|------------|-----------|-------|------|-----------------------------|--------------------|-----------|
| CakTpSSR00026 | CakTC00646   | (GA)7     | 1984  | 1997 | Ca(ICC4958)TpSSR01618 | TC09857    | (GA)10    | 2061  | 2080 | 3                           | --                 | --        |
| CakTpSSR00219 | CakTC05322   | (CAT)5    | 1130  | 1144 | Ca(ICC4958)TpSSR01328 | TC08180    | (CAT)7    | 1053  | 1073 | 2                           | --                 | --        |
| CakTpSSR00368 | CakTC08782   | (TC)21    | 17    | 58   | Ca(ICC4958)TpSSR02480 | TC15958    | (TC)13    | 56    | 81   | 8                           | --                 | --        |
| CakTpSSR00381 | CakTC08924   | (TCCTCT)9 | 2364  | 2417 | Ca(ICC4958)TpSSR00873 | TC05387    | (TCCTCT)6 | 2292  | 2327 | 3                           | --                 | --        |
| CakTpSSR00428 | CakTC09678   | (TCAC)9   | 1204  | 1239 | Ca(ICC4958)TpSSR00117 | TC00871    | (TCAC)7   | 1222  | 1249 | 2                           | --                 | --        |
| CakTpSSR00452 | CakTC09874   | (GA)8     | 1242  | 1257 | Ca(ICC4958)TpSSR00281 | TC01966    | (GA)10    | 1262  | 1281 | 2                           | --                 | --        |
| CakTpSSR00630 | CakTC11163   | (TC)6     | 92    | 103  | Ca(ICC4958)TpSSR02109 | TC13124    | (TC)17    | 204   | 237  | 11                          | Young_pod          | --        |
| CakTpSSR00643 | CakTC11370   | (TAA)10   | 1     | 30   | Ca(ICC4958)TpSSR02227 | TC14545    | (TAA)12   | 9     | 44   | 2                           | --                 | --        |
| CakTpSSR00729 | CakTC12463   | (TA)14    | 49    | 76   | Ca(ICC4958)TpSSR03164 | TC22801    | (TA)13    | 49    | 74   | 1                           | --                 | --        |
| CakTpSSR00739 | CakTC12740   | (CTT)5    | 197   | 211  | Ca(ICC4958)TpSSR03282 | TC26236    | (CTT)6    | 197   | 214  | 1                           | --                 | --        |
| CakTpSSR00744 | CakTC12877   | (CT)7     | 159   | 172  | Ca(ICC4958)TpSSR03335 | TC28683    | (CT)12    | 175   | 198  | 5                           | --                 | --        |
| CakTpSSR00748 | CakTC12979   | (GA)9     | 84    | 101  | Ca(ICC4958)TpSSR03401 | TC31429    | (GA)8     | 84    | 99   | 1                           | Flower bud         | --        |
| CakTpSSR00752 | CakTC13120   | (AGA)6    | 855   | 872  | Ca(ICC4958)TpSSR02662 | TC16903    | (AGA)8    | 45    | 68   | 2                           | --                 | --        |
| CakTpSSR00830 | CakTC14565   | (ATA)9    | 1455  | 1481 | Ca(ICC4958)TpSSR02007 | TC12302    | (ATA)10   | 1251  | 1280 | 1                           | --                 | --        |
| CakTpSSR00867 | CakTC15258   | (GA)14    | 3523  | 3550 | Ca(ICC4958)TpSSR01851 | TC11344    | (GA)16    | 3528  | 3559 | 2                           | --                 | CAMTA     |
| CakTpSSR01146 | CakTC21556   | (GA)11    | 1055  | 1076 | Ca(ICC4958)TpSSR03214 | TC23672    | (GA)10    | 1062  | 1081 | 1                           | --                 | --        |
| CakTpSSR01208 | CakTC22596   | (TA)8     | 224   | 239  | Ca(ICC4958)TpSSR00814 | TC05059    | (TA)6     | 365   | 376  | 2                           | --                 | --        |
| CakTpSSR01214 | CakTC22634   | (TA)11    | 1274  | 1295 | Ca(ICC4958)TpSSR01194 | TC07400    | (TA)12    | 1277  | 1300 | 1                           | --                 | --        |
| CakTpSSR01279 | CakTC23175   | (CACAAA)7 | 1634  | 1675 | Ca(ICC4958)TpSSR00033 | TC00294    | (CACAAA)8 | 1636  | 1683 | 1                           | --                 | --        |
| CakTpSSR01283 | CakTC23285   | (TG)7     | 1350  | 1363 | Ca(ICC4958)TpSSR03144 | TC22550    | (TG)8     | 1493  | 1508 | 1                           | Flower bud         | --        |
| CakTpSSR01308 | CakTC23402   | (TA)7     | 12    | 25   | Ca(ICC4958)TpSSR02913 | TC18998    | (TA)8     | 9     | 24   | 1                           | --                 | --        |
| CakTpSSR01352 | CakTC23616   | (CT)9     | 1068  | 1085 | Ca(ICC4958)TpSSR00856 | TC05299    | (CT)8     | 1144  | 1159 | 1                           | --                 | --        |
| CakTpSSR01394 | CakTC23803   | (TGA)15   | 3735  | 3779 | Ca(ICC4958)TpSSR03439 | TC34228    | (TGA)14   | 3099  | 3140 | 1                           | --                 | --        |
| CakTpSSR01400 | CakTC23833   | (AG)9     | 256   | 273  | Ca(ICC4958)TpSSR00905 | TC05500    | (AG)10    | 251   | 270  | 1                           | --                 | --        |
| CakTpSSR01486 | CakTC24535   | (TGGA)8   | 862   | 893  | Ca(ICC4958)TpSSR02031 | TC12444    | (TGGA)7   | 924   | 951  | 1                           | --                 | --        |
| CakTpSSR01488 | CakTC24545   | (AG)9     | 2849  | 2866 | Ca(ICC4958)TpSSR00159 | TC01142    | (AG)6     | 2993  | 3004 | 3                           | --                 | --        |

|               |            |         |      |      |                       |         |         |      |      |   |            |      |
|---------------|------------|---------|------|------|-----------------------|---------|---------|------|------|---|------------|------|
| CakTpSSR01500 | CakTC24617 | (ATG)6  | 855  | 872  | Ca(ICC4958)TpSSR03128 | TC22362 | (ATG)5  | 873  | 887  | 1 | Flower bud | --   |
| CakTpSSR01506 | CakTC24680 | (AT)7   | 539  | 552  | Ca(ICC4958)TpSSR01661 | TC10126 | (AT)8   | 287  | 302  | 1 | Young_pod  | --   |
| CakTpSSR01526 | CakTC24804 | (AG)12  | 119  | 142  | Ca(ICC4958)TpSSR01042 | TC06457 | (AG)18  | 46   | 81   | 6 | --         | --   |
| CakTpSSR01542 | CakTC24891 | (AAT)11 | 122  | 154  | Ca(ICC4958)TpSSR00635 | TC04041 | (AAT)13 | 100  | 138  | 2 | --         | --   |
| CakTpSSR01621 | CakTC25414 | (TCT)9  | 20   | 46   | Ca(ICC4958)TpSSR02974 | TC19743 | (TCT)11 | 72   | 104  | 2 | --         | --   |
| CakTpSSR01660 | CakTC25584 | (AG)6   | 1427 | 1438 | Ca(ICC4958)TpSSR00217 | TC01569 | (AG)13  | 206  | 231  | 7 | --         | TRAF |
| CakTpSSR01696 | CakTC25709 | (TGA)5  | 522  | 536  | Ca(ICC4958)TpSSR03351 | TC29442 | (TGA)6  | 4    | 21   | 1 | --         | --   |
| CakTpSSR01720 | CakTC25855 | (TAA)11 | 46   | 78   | Ca(ICC4958)TpSSR01235 | TC07671 | (TAA)9  | 49   | 75   | 2 | --         | --   |
| CakTpSSR01802 | CakTC26308 | (AG)19  | 1446 | 1483 | Ca(ICC4958)TpSSR01142 | TC07093 | (AG)16  | 1456 | 1487 | 3 | --         | --   |
| CakTpSSR01814 | CakTC26431 | (TC)8   | 14   | 29   | Ca(ICC4958)TpSSR01356 | TC08294 | (TC)7   | 6    | 19   | 1 | --         | --   |
| CakTpSSR01841 | CakTC26529 | (GA)25  | 2090 | 2139 | Ca(ICC4958)TpSSR00962 | TC05907 | (GA)28  | 1775 | 1830 | 3 | --         | --   |
| CakTpSSR01928 | CakTC27222 | (CT)13  | 1776 | 1801 | Ca(ICC4958)TpSSR02638 | TC16687 | (CT)12  | 1782 | 1805 | 1 | --         | --   |
| CakTpSSR01932 | CakTC27236 | (CT)12  | 94   | 117  | Ca(ICC4958)TpSSR00781 | TC04854 | (CT)9   | 9    | 26   | 3 | --         | --   |
| CakTpSSR01949 | CakTC27313 | (TC)7   | 1    | 14   | Ca(ICC4958)TpSSR01566 | TC09548 | (TC)8   | 18   | 33   | 1 | --         | --   |
| CakTpSSR01958 | CakTC27343 | (GA)21  | 1442 | 1483 | Ca(ICC4958)TpSSR02238 | TC14592 | (GA)20  | 1448 | 1487 | 1 | --         | BES1 |
| CakTpSSR01981 | CakTC27530 | (TC)12  | 1219 | 1242 | Ca(ICC4958)TpSSR01152 | TC07156 | (TC)11  | 1198 | 1219 | 1 | --         | --   |
| CakTpSSR02042 | CakTC27908 | (TTC)6  | 165  | 182  | Ca(ICC4958)TpSSR02064 | TC12644 | (TTC)7  | 165  | 185  | 1 | --         | --   |
| CakTpSSR02074 | CakTC28116 | (GTG)8  | 1614 | 1637 | Ca(ICC4958)TpSSR01498 | TC09117 | (GTG)6  | 1614 | 1631 | 2 | --         | --   |
| CakTpSSR02142 | CakTC28476 | (TA)6   | 319  | 330  | Ca(ICC4958)TpSSR02228 | TC14548 | (TA)7   | 159  | 172  | 1 | --         | --   |
| CakTpSSR02149 | CakTC28528 | (AG)16  | 760  | 791  | Ca(ICC4958)TpSSR00841 | TC05210 | (AG)17  | 665  | 698  | 1 | --         | --   |
| CakTpSSR02169 | CakTC28712 | (AG)8   | 886  | 901  | Ca(ICC4958)TpSSR02887 | TC18797 | (AG)11  | 870  | 891  | 3 | --         | --   |
| CakTpSSR02188 | CakTC28814 | (AGA)11 | 2055 | 2087 | Ca(ICC4958)TpSSR02415 | TC15640 | (AGA)12 | 1996 | 2031 | 1 | --         | --   |
| CakTpSSR02222 | CakTC29000 | (TTC)10 | 171  | 200  | Ca(ICC4958)TpSSR00509 | TC03306 | (TTC)5  | 27   | 41   | 5 | --         | --   |
| CakTpSSR02459 | CakTC30368 | (AG)11  | 1246 | 1267 | Ca(ICC4958)TpSSR02824 | TC18242 | (AG)10  | 952  | 971  | 1 | --         | --   |
| CakTpSSR02497 | CakTC30675 | (AT)7   | 183  | 196  | Ca(ICC4958)TpSSR02664 | TC16913 | (AT)10  | 174  | 193  | 3 | --         | --   |
| CakTpSSR02499 | CakTC30698 | (ATG)7  | 391  | 411  | Ca(ICC4958)TpSSR02814 | TC18156 | (ATG)5  | 226  | 240  | 2 | --         | --   |
| CakTpSSR02543 | CakTC30946 | (TAT)8  | 119  | 142  | Ca(ICC4958)TpSSR02726 | TC17430 | (TAT)6  | 119  | 136  | 2 | --         | --   |
| CakTpSSR02622 | CakTC31433 | (GT)12  | 3927 | 3950 | Ca(ICC4958)TpSSR00683 | TC04310 | (GT)13  | 3925 | 3950 | 1 | --         | --   |
| CakTpSSR02637 | CakTC31492 | (GATA)7 | 1607 | 1634 | Ca(ICC4958)TpSSR01477 | TC08987 | (GATA)8 | 648  | 679  | 1 | --         | --   |
| CakTpSSR02667 | CakTC31656 | (CTT)5  | 64   | 78   | Ca(ICC4958)TpSSR01057 | TC06534 | (CTT)6  | 46   | 63   | 1 | --         | --   |

|               |            |           |      |      |                       |         |           |      |      |    |           |             |
|---------------|------------|-----------|------|------|-----------------------|---------|-----------|------|------|----|-----------|-------------|
| CakTpSSR02706 | CakTC31866 | (AG)18    | 2317 | 2352 | Ca(ICC4958)TpSSR00257 | TC01827 | (AG)8     | 2452 | 2467 | 10 | --        | --          |
| CakTpSSR02719 | CakTC32010 | (CAG)5    | 1224 | 1238 | Ca(ICC4958)TpSSR00219 | TC01590 | (CAG)6    | 1071 | 1088 | 1  | --        | --          |
| CakTpSSR02802 | CakTC32400 | (TC)11    | 30   | 51   | Ca(ICC4958)TpSSR01599 | TC09738 | (TC)12    | 2    | 25   | 1  | --        | --          |
| CakTpSSR02806 | CakTC32453 | (TC)6     | 604  | 615  | Ca(ICC4958)TpSSR02737 | TC17540 | (TC)8     | 604  | 619  | 2  | --        | --          |
| CakTpSSR02813 | CakTC32488 | (CTT)8    | 1662 | 1685 | Ca(ICC4958)TpSSR01141 | TC07091 | (CTT)9    | 2008 | 2034 | 1  | --        | TCP         |
| CakTpSSR02824 | CakTC32576 | (ATT)16   | 2243 | 2290 | Ca(ICC4958)TpSSR01370 | TC08358 | (ATT)15   | 2241 | 2285 | 1  | --        | --          |
| CakTpSSR02886 | CakTC33013 | (AG)13    | 2881 | 2906 | Ca(ICC4958)TpSSR01648 | TC10033 | (AG)14    | 2862 | 2889 | 1  | --        | --          |
| CakTpSSR02894 | CakTC33055 | (AT)10    | 601  | 620  | Ca(ICC4958)TpSSR01649 | TC10046 | (AT)8     | 521  | 536  | 2  | --        | --          |
| CakTpSSR02898 | CakTC33105 | (TA)8     | 2388 | 2403 | Ca(ICC4958)TpSSR01488 | TC09053 | (TA)9     | 65   | 82   | 1  | --        | --          |
| CakTpSSR02900 | CakTC33120 | (AG)25    | 1    | 50   | Ca(ICC4958)TpSSR01159 | TC07211 | (AG)23    | 56   | 101  | 2  | --        | --          |
| CakTpSSR02930 | CakTC33291 | (AG)13    | 4884 | 4909 | Ca(ICC4958)TpSSR00158 | TC01136 | (AG)12    | 4900 | 4923 | 1  | --        | --          |
| CakTpSSR02952 | CakTC33440 | (AG)7     | 1890 | 1903 | Ca(ICC4958)TpSSR00916 | TC05616 | (AG)6     | 1887 | 1898 | 1  | --        | --          |
| CakTpSSR02970 | CakTC33640 | (TA)10    | 2154 | 2173 | Ca(ICC4958)TpSSR01462 | TC08921 | (TA)9     | 1985 | 2002 | 1  | --        | TPR         |
| CakTpSSR02987 | CakTC33747 | (CT)8     | 652  | 667  | Ca(ICC4958)TpSSR02709 | TC17310 | (CT)12    | 652  | 675  | 4  | --        | --          |
| CakTpSSR02992 | CakTC33793 | (AG)25    | 2395 | 2444 | Ca(ICC4958)TpSSR02459 | TC15892 | (AG)23    | 2395 | 2440 | 2  | --        | --          |
| CakTpSSR03000 | CakTC33850 | (TCA)6    | 395  | 412  | Ca(ICC4958)TpSSR02735 | TC17527 | (TCA)7    | 413  | 433  | 1  | --        | --          |
| CakTpSSR03003 | CakTC33861 | (TC)6     | 2447 | 2458 | Ca(ICC4958)TpSSR00864 | TC05340 | (TC)7     | 2453 | 2466 | 1  | --        | --          |
| CakTpSSR03090 | CakTC34556 | (ATTCAT)7 | 200  | 241  | Ca(ICC4958)TpSSR01265 | TC07827 | (ATTCAT)6 | 206  | 241  | 1  | --        | bHLH        |
| CakTpSSR03117 | CakTC34751 | (AT)10    | 192  | 211  | Ca(ICC4958)TpSSR00718 | TC04509 | (AT)12    | 3479 | 3502 | 2  | --        | --          |
| CakTpSSR03118 | CakTC34754 | (AG)12    | 3280 | 3303 | Ca(ICC4958)TpSSR02469 | TC15922 | (AG)10    | 3314 | 3333 | 2  | --        | --          |
| CakTpSSR03171 | CakTC35154 | (TC)8     | 4019 | 4034 | Ca(ICC4958)TpSSR01627 | TC09901 | (TC)7     | 4018 | 4031 | 1  | --        | --          |
| CakTpSSR03193 | CakTC35309 | (AGA)9    | 658  | 684  | Ca(ICC4958)TpSSR01323 | TC08159 | (AGA)8    | 661  | 684  | 1  | --        | Bromodomain |
| CakTpSSR03312 | CakTC36126 | (AG)9     | 16   | 33   | Ca(ICC4958)TpSSR00762 | TC04777 | (AG)12    | 8    | 31   | 3  | --        | ARF         |
| CakTpSSR03317 | CakTC36179 | (GA)19    | 2716 | 2753 | Ca(ICC4958)TpSSR01327 | TC08178 | (GA)24    | 2679 | 2726 | 5  | --        | --          |
| CakTpSSR03345 | CakTC36401 | (AG)6     | 3140 | 3151 | Ca(ICC4958)TpSSR00951 | TC05805 | (AG)7     | 281  | 294  | 1  | --        | HB          |
| CakTpSSR03422 | CakTC37047 | (TG)10    | 2692 | 2711 | Ca(ICC4958)TpSSR01664 | TC10149 | (TG)9     | 2649 | 2666 | 1  | --        | --          |
| CakTpSSR03480 | CakTC37363 | (ATC)8    | 526  | 549  | Ca(ICC4958)TpSSR01799 | TC11053 | (ATC)10   | 423  | 452  | 2  | --        | --          |
| CakTpSSR03485 | CakTC37408 | (AAG)13   | 1112 | 1150 | Ca(ICC4958)TpSSR02832 | TC18327 | (AAG)5    | 1112 | 1126 | 8  | --        | --          |
| CakTpSSR03486 | CakTC37409 | (CT)17    | 4    | 37   | Ca(ICC4958)TpSSR03358 | TC29761 | (CT)12    | 31   | 54   | 5  | Young_pod | --          |
| CakTpSSR03521 | CakTC37545 | (GA)17    | 1609 | 1642 | Ca(ICC4958)TpSSR02586 | TC16423 | (GA)22    | 1608 | 1651 | 5  | --        | --          |

|               |            |         |      |      |                       |         |         |      |      |    |            |         |
|---------------|------------|---------|------|------|-----------------------|---------|---------|------|------|----|------------|---------|
| CakTpSSR03532 | CakTC37598 | (TTG)6  | 1177 | 1194 | Ca(ICC4958)TpSSR01794 | TC11038 | (TTG)5  | 1131 | 1145 | 1  | --         | --      |
| CakTpSSR03556 | CakTC37742 | (GA)10  | 169  | 188  | Ca(ICC4958)TpSSR00458 | TC03027 | (GA)8   | 2428 | 2443 | 2  | Flower bud | --      |
| CakTpSSR03565 | CakTC37776 | (CTT)7  | 60   | 80   | Ca(ICC4958)TpSSR02783 | TC17959 | (CTT)8  | 100  | 123  | 1  | --         | --      |
| CakTpSSR03588 | CakTC37889 | (GA)10  | 1668 | 1687 | Ca(ICC4958)TpSSR01776 | TC10907 | (GA)11  | 1648 | 1669 | 1  | --         | --      |
| CakTpSSR03637 | CakTC38143 | (TTC)12 | 1028 | 1063 | Ca(ICC4958)TpSSR02320 | TC15067 | (TTC)8  | 1079 | 1102 | 4  | --         | --      |
| CakTpSSR03639 | CakTC38187 | (GA)14  | 1760 | 1787 | Ca(ICC4958)TpSSR02595 | TC16474 | (GA)11  | 1689 | 1710 | 3  | --         | --      |
| CakTpSSR03662 | CakTC38353 | (CT)15  | 18   | 47   | Ca(ICC4958)TpSSR01269 | TC07866 | (CT)14  | 1    | 28   | 1  | --         | --      |
| CakTpSSR03667 | CakTC38412 | (GA)15  | 1686 | 1715 | Ca(ICC4958)TpSSR01421 | TC08653 | (GA)16  | 1770 | 1801 | 1  | --         | --      |
| CakTpSSR03684 | CakTC38539 | (TC)7   | 1631 | 1644 | Ca(ICC4958)TpSSR02536 | TC16204 | (TC)8   | 1614 | 1629 | 1  | --         | --      |
| CakTpSSR03721 | CakTC38734 | (GA)15  | 1476 | 1505 | Ca(ICC4958)TpSSR02226 | TC14544 | (GA)6   | 1408 | 1419 | 9  | --         | --      |
| CakTpSSR03756 | CakTC38907 | (TA)10  | 1265 | 1284 | Ca(ICC4958)TpSSR02343 | TC15225 | (TA)6   | 1267 | 1278 | 4  | --         | --      |
| CakTpSSR03776 | CakTC38997 | (TC)10  | 1435 | 1454 | Ca(ICC4958)TpSSR01838 | TC11273 | (TC)9   | 1445 | 1462 | 1  | --         | SWI/SNF |
| CakTpSSR03786 | CakTC39038 | (TTC)20 | 35   | 94   | Ca(ICC4958)TpSSR02216 | TC14490 | (TTC)18 | 26   | 79   | 2  | --         | --      |
| CakTpSSR03806 | CakTC39158 | (TC)9   | 1574 | 1591 | Ca(ICC4958)TpSSR02014 | TC12350 | (TC)7   | 2082 | 2095 | 2  | --         | SBP     |
| CakTpSSR03815 | CakTC39206 | (CT)7   | 115  | 128  | Ca(ICC4958)TpSSR01626 | TC09898 | (CT)6   | 132  | 143  | 1  | --         | AUX/IAA |
| CakTpSSR03820 | CakTC39223 | (ATA)6  | 1535 | 1552 | Ca(ICC4958)TpSSR00204 | TC01434 | (ATA)7  | 1536 | 1556 | 1  | --         | C2H2    |
| CakTpSSR03821 | CakTC39225 | (TC)11  | 149  | 170  | Ca(ICC4958)TpSSR01817 | TC11158 | (TC)10  | 88   | 107  | 1  | --         | --      |
| CakTpSSR03822 | CakTC39230 | (TC)26  | 1    | 52   | Ca(ICC4958)TpSSR02329 | TC15147 | (TC)36  | 1    | 72   | 10 | --         | --      |
| CakTpSSR03826 | CakTC39247 | (AG)12  | 1566 | 1589 | Ca(ICC4958)TpSSR00969 | TC05928 | (AG)11  | 1571 | 1592 | 1  | --         | --      |
| CakTpSSR03829 | CakTC39262 | (AG)20  | 1520 | 1559 | Ca(ICC4958)TpSSR02047 | TC12532 | (AG)12  | 1492 | 1515 | 8  | --         | --      |
| CakTpSSR03853 | CakTC39411 | (AG)7   | 15   | 28   | Ca(ICC4958)TpSSR00845 | TC05231 | (AG)8   | 13   | 28   | 1  | --         | --      |
| CakTpSSR03891 | CakTC39656 | (TTC)17 | 45   | 95   | Ca(ICC4958)TpSSR02917 | TC19015 | (TTC)21 | 64   | 126  | 4  | --         | --      |
| CakTpSSR03899 | CakTC39710 | (ATA)10 | 1334 | 1363 | Ca(ICC4958)TpSSR02322 | TC15070 | (ATA)7  | 1291 | 1311 | 3  | --         | --      |
| CakTpSSR03923 | CakTC39799 | (GAA)19 | 1300 | 1356 | Ca(ICC4958)TpSSR01692 | TC10313 | (GAA)18 | 1097 | 1150 | 1  | --         | bZIP    |
| CakTpSSR03960 | CakTC40044 | (CTT)6  | 706  | 723  | Ca(ICC4958)TpSSR01049 | TC06514 | (CTT)5  | 706  | 720  | 1  | --         | --      |
| CakTpSSR03970 | CakTC40146 | (TGA)9  | 1298 | 1324 | Ca(ICC4958)TpSSR01825 | TC11208 | (TGA)12 | 1283 | 1318 | 3  | --         | --      |
| CakTpSSR04045 | CakTC40557 | (TC)12  | 641  | 664  | Ca(ICC4958)TpSSR02685 | TC17104 | (TC)11  | 647  | 668  | 1  | --         | --      |
| CakTpSSR04058 | CakTC40637 | (GA)20  | 2026 | 2065 | Ca(ICC4958)TpSSR02422 | TC15677 | (GA)18  | 2026 | 2061 | 2  | --         | WRKY    |
| CakTpSSR04076 | CakTC40711 | (CCA)5  | 950  | 964  | Ca(ICC4958)TpSSR00090 | TC00618 | (CCA)6  | 946  | 963  | 1  | --         | --      |
| CakTpSSR04141 | CakTC41199 | (TC)12  | 178  | 201  | Ca(ICC4958)TpSSR02445 | TC15793 | (TC)14  | 177  | 204  | 2  | --         | --      |

|               |            |         |      |      |                       |         |         |      |      |   |           |          |
|---------------|------------|---------|------|------|-----------------------|---------|---------|------|------|---|-----------|----------|
| CakTpSSR04176 | CakTC41338 | (TTC)9  | 418  | 444  | Ca(ICC4958)TpSSR00663 | TC04203 | (TTC)5  | 418  | 432  | 4 | --        | --       |
| CakTpSSR04185 | CakTC41423 | (TC)8   | 20   | 35   | Ca(ICC4958)TpSSR00577 | TC03730 | (TC)7   | 55   | 68   | 1 | --        | --       |
| CakTpSSR04189 | CakTC41441 | (AG)18  | 2    | 37   | Ca(ICC4958)TpSSR02454 | TC15839 | (AG)10  | 14   | 33   | 8 | --        | --       |
| CakTpSSR04240 | CakTC41792 | (GA)12  | 2265 | 2288 | Ca(ICC4958)TpSSR01646 | TC10031 | (GA)13  | 2357 | 2382 | 1 | --        | --       |
| CakTpSSR04265 | CakTC41944 | (TAA)17 | 627  | 677  | Ca(ICC4958)TpSSR01075 | TC06664 | (TAA)14 | 594  | 635  | 3 | --        | C2C2-Dof |
| CakTpSSR04290 | CakTC42107 | (TTA)8  | 893  | 916  | Ca(ICC4958)TpSSR02959 | TC19502 | (TTA)7  | 894  | 914  | 1 | --        | --       |
| CakTpSSR04307 | CakTC42202 | (CT)7   | 874  | 887  | Ca(ICC4958)TpSSR01443 | TC08808 | (CT)8   | 1033 | 1048 | 1 | --        | --       |
| CakTpSSR04360 | CakTC42489 | (GA)15  | 1    | 30   | Ca(ICC4958)TpSSR00334 | TC02328 | (GA)14  | 4    | 31   | 1 | Shoot     | --       |
| CakTpSSR04389 | CakTC42648 | (AG)6   | 113  | 124  | Ca(ICC4958)TpSSR02552 | TC16250 | (AG)7   | 113  | 126  | 1 | --        | --       |
| CakTpSSR04404 | CakTC42701 | (TCT)7  | 856  | 876  | Ca(ICC4958)TpSSR02791 | TC18026 | (TCT)8  | 924  | 947  | 1 | --        | --       |
| CakTpSSR04421 | CakTC42806 | (AG)16  | 1917 | 1948 | Ca(ICC4958)TpSSR01802 | TC11083 | (AG)17  | 1894 | 1927 | 1 | --        | --       |
| CakTpSSR04457 | CakTC43019 | (AG)9   | 15   | 32   | Ca(ICC4958)TpSSR00305 | TC02135 | (AG)8   | 15   | 30   | 1 | Young_pod | --       |
| CakTpSSR04464 | CakTC43053 | (TC)8   | 1908 | 1923 | Ca(ICC4958)TpSSR00955 | TC05850 | (TC)7   | 1917 | 1930 | 1 | --        | --       |
| CakTpSSR04488 | CakTC43146 | (TCT)6  | 128  | 145  | Ca(ICC4958)TpSSR03203 | TC23463 | (TCT)5  | 154  | 168  | 1 | --        | --       |
