# Supplementary material
Source: publisher figshare collection journal article supplement (https://plos.figshare.com/articles/dataset/_/115291)
Supplement: Supplementary file 1 [file 1 › Table_S9.pdf]

**Table S9. List of polymorphic SSRs identified between kabuli and wild chickpea.**

| Kabuli SSR ID | Kabuli TC ID | SSR      | Start | End  | Wild SSR ID  | Wild TC ID | SSR      | Start | End  | Repeat unit size difference | Tissue specificity | TF family |
|---------------|--------------|----------|-------|------|--------------|------------|----------|-------|------|-----------------------------|--------------------|-----------|
| CakTpSSR00050 | CakTC01101   | (ATT)6   | 367   | 384  | CrTpSSR01148 | CrTC11127  | (ATT)5   | 368   | 382  | 1                           | --                 | Trihelix  |
| CakTpSSR00051 | CakTC01101   | (TCA)6   | 1079  | 1096 | CrTpSSR01150 | CrTC11127  | (TCA)8   | 1078  | 1101 | 2                           | --                 | Trihelix  |
| CakTpSSR00063 | CakTC01357   | (TC)7    | 79    | 92   | CrTpSSR02001 | CrTC21086  | (TC)6    | 74    | 85   | 1                           | --                 | --        |
| CakTpSSR00076 | CakTC01782   | (TCCT)8  | 162   | 193  | CrTpSSR00144 | CrTC01670  | (TCCT)9  | 205   | 240  | 1                           | --                 | --        |
| CakTpSSR00086 | CakTC02070   | (TG)10   | 617   | 636  | CrTpSSR01375 | CrTC13599  | (TG)7    | 1748  | 1761 | 3                           | --                 | --        |
| CakTpSSR00111 | CakTC02781   | (AG)10   | 580   | 599  | CrTpSSR00455 | CrTC04402  | (AG)8    | 3     | 18   | 2                           | --                 | --        |
| CakTpSSR00118 | CakTC03007   | (AGA)7   | 132   | 152  | CrTpSSR00404 | CrTC03926  | (AGA)8   | 132   | 155  | 1                           | --                 | --        |
| CakTpSSR00125 | CakTC03355   | (CT)19   | 188   | 225  | CrTpSSR01386 | CrTC13673  | (CT)11   | 197   | 218  | 8                           | --                 | --        |
| CakTpSSR00131 | CakTC03451   | (AAC)6   | 323   | 340  | CrTpSSR01478 | CrTC14630  | (AAC)5   | 350   | 364  | 1                           | --                 | --        |
| CakTpSSR00149 | CakTC03814   | (CTA)6   | 799   | 816  | CrTpSSR01450 | CrTC14353  | (CTA)5   | 737   | 751  | 1                           | --                 | --        |
| CakTpSSR00154 | CakTC03853   | (TA)7    | 57    | 70   | CrTpSSR03362 | CrTC35806  | (TA)8    | 890   | 905  | 1                           | --                 | --        |
| CakTpSSR00157 | CakTC03971   | (GTT)7   | 1185  | 1205 | CrTpSSR01823 | CrTC18519  | (GTT)5   | 1130  | 1144 | 2                           | --                 | bHLH      |
| CakTpSSR00171 | CakTC04226   | (CT)9    | 149   | 166  | CrTpSSR01271 | CrTC12446  | (CT)8    | 250   | 265  | 1                           | --                 | --        |
| CakTpSSR00178 | CakTC04397   | (ACA)5   | 307   | 321  | CrTpSSR02421 | CrTC27371  | (ACA)6   | 108   | 125  | 1                           | --                 | --        |
| CakTpSSR00184 | CakTC04586   | (TGA)6   | 376   | 393  | CrTpSSR02288 | CrTC25118  | (TGA)5   | 252   | 266  | 1                           | --                 | --        |
| CakTpSSR00192 | CakTC04741   | (CTT)8   | 92    | 115  | CrTpSSR01479 | CrTC14649  | (CTT)7   | 86    | 106  | 1                           | --                 | --        |
| CakTpSSR00219 | CakTC05322   | (CAT)5   | 1130  | 1144 | CrTpSSR01309 | CrTC12894  | (CAT)7   | 1178  | 1198 | 2                           | --                 | --        |
| CakTpSSR00255 | CakTC06423   | (AAT)17  | 9     | 59   | CrTpSSR01443 | CrTC14298  | (AAT)11  | 39    | 71   | 6                           | --                 | TPR       |
| CakTpSSR00278 | CakTC07091   | (TGT)7   | 526   | 546  | CrTpSSR01351 | CrTC13301  | (TGT)6   | 431   | 448  | 1                           | --                 | --        |
| CakTpSSR00290 | CakTC07556   | (GAA)7   | 2559  | 2579 | CrTpSSR00728 | CrTC07188  | (GAA)6   | 1466  | 1483 | 1                           | --                 | --        |
| CakTpSSR00291 | CakTC07557   | (GAA)8   | 30    | 53   | CrTpSSR00734 | CrTC07211  | (GAA)5   | 440   | 454  | 3                           | --                 | --        |
| CakTpSSR00339 | CakTC08339   | (TC)10   | 3762  | 3781 | CrTpSSR02247 | CrTC24437  | (TC)9    | 245   | 262  | 1                           | --                 | --        |
| CakTpSSR00340 | CakTC08400   | (ACT)6   | 947   | 964  | CrTpSSR01297 | CrTC12754  | (ACT)7   | 480   | 500  | 1                           | Flower bud         | --        |
| CakTpSSR00344 | CakTC08487   | (CAG)6   | 1221  | 1238 | CrTpSSR02427 | CrTC27424  | (CAG)5   | 643   | 657  | 1                           | --                 | NAC       |
| CakTpSSR00356 | CakTC08597   | (TA)8    | 22    | 37   | CrTpSSR02608 | CrTC29383  | (TA)7    | 3     | 16   | 1                           | --                 | --        |
| CakTpSSR00375 | CakTC08847   | (TTA)6   | 359   | 376  | CrTpSSR00406 | CrTC03962  | (TTA)5   | 434   | 448  | 1                           | --                 | --        |
| CakTpSSR00380 | CakTC08897   | (AT)7    | 29    | 42   | CrTpSSR00894 | CrTC08657  | (AT)9    | 1577  | 1594 | 2                           | Mature Leaf        | --        |
| CakTpSSR00388 | CakTC09051   | (AG)7    | 2012  | 2025 | CrTpSSR01463 | CrTC14473  | (AG)8    | 2033  | 2048 | 1                           | --                 | --        |
| CakTpSSR00392 | CakTC09122   | (TC)11   | 67    | 88   | CrTpSSR00934 | CrTC09162  | (TC)8    | 20    | 35   | 3                           | --                 | --        |
| CakTpSSR00393 | CakTC09132   | (GT)6    | 583   | 594  | CrTpSSR01501 | CrTC14909  | (GT)7    | 257   | 270  | 1                           | --                 | --        |
| CakTpSSR00398 | CakTC09209   | (TA)6    | 1287  | 1298 | CrTpSSR00912 | CrTC08943  | (TA)7    | 5     | 18   | 1                           | --                 | --        |
| CakTpSSR00428 | CakTC09678   | (TCAC)9  | 1204  | 1239 | CrTpSSR00281 | CrTC02617  | (TCAC)6  | 59    | 82   | 3                           | --                 | --        |
| CakTpSSR00430 | CakTC09700   | (CA)6    | 1308  | 1319 | CrTpSSR01610 | CrTC16213  | (CA)7    | 1401  | 1414 | 1                           | --                 | --        |
| CakTpSSR00447 | CakTC09856   | (GAAGA)6 | 7     | 36   | CrTpSSR02404 | CrTC27128  | (GAAGA)5 | 7     | 31   | 1                           | --                 | --        |
| CakTpSSR00449 | CakTC09870   | (TAT)7   | 1647  | 1667 | CrTpSSR02407 | CrTC27186  | (TAT)6   | 1557  | 1574 | 1                           | --                 | --        |

|               |            |        |      |      |              |           |         |      |      |    |            |            |
|---------------|------------|--------|------|------|--------------|-----------|---------|------|------|----|------------|------------|
| CakTpSSR00453 | CakTC09877 | (CT)9  | 1062 | 1079 | CrTpSSR00342 | CrTC03192 | (CT)8   | 1064 | 1079 | 1  | --         | --         |
| CakTpSSR00456 | CakTC09899 | (TA)8  | 119  | 134  | CrTpSSR02418 | CrTC27305 | (TA)7   | 230  | 243  | 1  | --         | --         |
| CakTpSSR00508 | CakTC10199 | (TAA)6 | 973  | 990  | CrTpSSR02501 | CrTC28417 | (TAA)7  | 928  | 948  | 1  | --         | TCP        |
| CakTpSSR00511 | CakTC10232 | (TCT)6 | 226  | 243  | CrTpSSR00507 | CrTC04893 | (TCT)8  | 77   | 100  | 2  | --         | --         |
| CakTpSSR00548 | CakTC10459 | (AG)11 | 3566 | 3587 | CrTpSSR02624 | CrTC29612 | (AG)10  | 1114 | 1133 | 1  | --         | --         |
| CakTpSSR00565 | CakTC10651 | (CTG)6 | 90   | 107  | CrTpSSR01277 | CrTC12581 | (CTG)7  | 1215 | 1235 | 1  | --         | --         |
| CakTpSSR00573 | CakTC10685 | (TC)17 | 272  | 305  | CrTpSSR02749 | CrTC30699 | (TC)12  | 274  | 297  | 5  | --         | --         |
| CakTpSSR00575 | CakTC10700 | (TG)10 | 263  | 282  | CrTpSSR02758 | CrTC30775 | (TG)7   | 203  | 216  | 3  | --         | --         |
| CakTpSSR00583 | CakTC10754 | (AAT)5 | 265  | 279  | CrTpSSR00218 | CrTC02283 | (AAT)6  | 166  | 183  | 1  | --         | --         |
| CakTpSSR00586 | CakTC10765 | (AG)9  | 1786 | 1803 | CrTpSSR01389 | CrTC13702 | (AG)49  | 1768 | 1865 | 40 | --         | --         |
| CakTpSSR00595 | CakTC10832 | (ATC)6 | 119  | 136  | CrTpSSR02872 | CrTC31611 | (ATC)5  | 116  | 130  | 1  | --         | C2C2-YABBY |
| CakTpSSR00597 | CakTC10898 | (ACA)6 | 105  | 122  | CrTpSSR02301 | CrTC25451 | (ACA)5  | 165  | 179  | 1  | Flower bud | --         |
| CakTpSSR00600 | CakTC10938 | (AG)12 | 936  | 959  | CrTpSSR02925 | CrTC32160 | (AG)10  | 940  | 959  | 2  | --         | --         |
| CakTpSSR00608 | CakTC10982 | (AAG)8 | 117  | 140  | CrTpSSR01477 | CrTC14629 | (AAG)5  | 130  | 144  | 3  | --         | --         |
| CakTpSSR00612 | CakTC11019 | (GAA)5 | 436  | 450  | CrTpSSR02980 | CrTC32653 | (GAA)6  | 362  | 379  | 1  | --         | --         |
| CakTpSSR00619 | CakTC11066 | (AG)27 | 2928 | 2981 | CrTpSSR03025 | CrTC33015 | (AG)15  | 2900 | 2929 | 12 | --         | --         |
| CakTpSSR00621 | CakTC11084 | (CT)15 | 13   | 42   | CrTpSSR00630 | CrTC06171 | (CT)10  | 67   | 86   | 5  | --         | --         |
| CakTpSSR00630 | CakTC11163 | (TC)6  | 92   | 103  | CrTpSSR03065 | CrTC33449 | (TC)7   | 198  | 211  | 1  | Young_pod  | --         |
| CakTpSSR00632 | CakTC11206 | (GA)10 | 801  | 820  | CrTpSSR00291 | CrTC02728 | (GA)7   | 797  | 810  | 3  | --         | --         |
| CakTpSSR00641 | CakTC11367 | (CT)10 | 116  | 135  | CrTpSSR02245 | CrTC24418 | (CT)7   | 113  | 126  | 3  | --         | --         |
| CakTpSSR00654 | CakTC11421 | (TCT)6 | 102  | 119  | CrTpSSR03178 | CrTC34299 | (TCT)7  | 104  | 124  | 1  | --         | --         |
| CakTpSSR00676 | CakTC11623 | (TGA)5 | 141  | 155  | CrTpSSR03397 | CrTC36149 | (TGA)7  | 201  | 221  | 2  | --         | --         |
| CakTpSSR00701 | CakTC11960 | (CAT)5 | 79   | 93   | CrTpSSR03430 | CrTC36624 | (CAT)6  | 168  | 185  | 1  | Young_pod  | --         |
| CakTpSSR00732 | CakTC12506 | (GA)7  | 1922 | 1935 | CrTpSSR00330 | CrTC03075 | (GA)10  | 1352 | 1371 | 3  | Young_pod  | --         |
| CakTpSSR00739 | CakTC12740 | (CTT)5 | 197  | 211  | CrTpSSR02000 | CrTC21081 | (CTT)6  | 110  | 127  | 1  | --         | --         |
| CakTpSSR00763 | CakTC13377 | (GTT)8 | 575  | 598  | CrTpSSR00515 | CrTC04996 | (GTT)7  | 802  | 822  | 1  | --         | --         |
| CakTpSSR00781 | CakTC13669 | (AT)7  | 1112 | 1125 | CrTpSSR02038 | CrTC21453 | (AT)6   | 223  | 234  | 1  | --         | --         |
| CakTpSSR00794 | CakTC13915 | (AT)6  | 230  | 241  | CrTpSSR00002 | CrTC00024 | (AT)8   | 270  | 285  | 2  | --         | --         |
| CakTpSSR00827 | CakTC14515 | (TAC)7 | 119  | 139  | CrTpSSR02959 | CrTC32513 | (TAC)5  | 110  | 124  | 2  | --         | --         |
| CakTpSSR00848 | CakTC14908 | (TGG)5 | 187  | 201  | CrTpSSR00811 | CrTC07915 | (TGG)6  | 743  | 760  | 1  | --         | --         |
| CakTpSSR00867 | CakTC15258 | (GA)14 | 3523 | 3550 | CrTpSSR02975 | CrTC32618 | (GA)16  | 3520 | 3551 | 2  | --         | CAMTA      |
| CakTpSSR00970 | CakTC16863 | (ATA)7 | 430  | 450  | CrTpSSR01011 | CrTC09887 | (ATA)10 | 736  | 765  | 3  | --         | --         |
| CakTpSSR00997 | CakTC17443 | (TAT)6 | 367  | 384  | CrTpSSR00162 | CrTC01914 | (TAT)5  | 149  | 163  | 1  | --         | --         |
| CakTpSSR01019 | CakTC17859 | (GAA)5 | 471  | 485  | CrTpSSR01139 | CrTC11042 | (GAA)6  | 413  | 430  | 1  | --         | --         |
| CakTpSSR01087 | CakTC19704 | (AGA)6 | 8    | 25   | CrTpSSR02162 | CrTC23178 | (AGA)5  | 31   | 45   | 1  | --         | --         |
| CakTpSSR01096 | CakTC20168 | (GAA)6 | 1582 | 1599 | CrTpSSR00473 | CrTC04572 | (GAA)5  | 1466 | 1480 | 1  | --         | --         |
| CakTpSSR01126 | CakTC21175 | (AT)9  | 158  | 175  | CrTpSSR02018 | CrTC21190 | (AT)8   | 203  | 218  | 1  | --         | --         |
| CakTpSSR01146 | CakTC21556 | (GA)11 | 1055 | 1076 | CrTpSSR03449 | CrTC36970 | (GA)10  | 1037 | 1056 | 1  | --         | --         |
| CakTpSSR01178 | CakTC22251 | (ATT)5 | 2077 | 2091 | CrTpSSR00565 | CrTC05532 | (ATT)8  | 1997 | 2020 | 3  | --         | --         |
| CakTpSSR01214 | CakTC22634 | (TA)11 | 1274 | 1295 | CrTpSSR02731 | CrTC30514 | (TA)8   | 1265 | 1280 | 3  | --         | --         |

|               |            |         |      |      |              |           |         |      |      |   |            |      |
|---------------|------------|---------|------|------|--------------|-----------|---------|------|------|---|------------|------|
| CakTpSSR01218 | CakTC22646 | (CAT)6  | 64   | 81   | CrTpSSR02526 | CrTC28626 | (CAT)5  | 52   | 66   | 1 | --         | --   |
| CakTpSSR01255 | CakTC23047 | (TA)7   | 121  | 134  | CrTpSSR00202 | CrTC02222 | (TA)8   | 113  | 128  | 1 | --         | --   |
| CakTpSSR01299 | CakTC23351 | (TC)11  | 1539 | 1560 | CrTpSSR00530 | CrTC05075 | (TC)9   | 1537 | 1554 | 2 | --         | --   |
| CakTpSSR01324 | CakTC23480 | (GA)13  | 2684 | 2709 | CrTpSSR00924 | CrTC09059 | (GA)19  | 2593 | 2630 | 6 | --         | --   |
| CakTpSSR01326 | CakTC23493 | (AG)11  | 916  | 937  | CrTpSSR00260 | CrTC02497 | (AG)9   | 932  | 949  | 2 | --         | --   |
| CakTpSSR01352 | CakTC23616 | (CT)9   | 1068 | 1085 | CrTpSSR00028 | CrTC00391 | (CT)6   | 1037 | 1048 | 3 | --         | --   |
| CakTpSSR01373 | CakTC23713 | (AT)7   | 1499 | 1512 | CrTpSSR02355 | CrTC26291 | (AT)6   | 67   | 78   | 1 | --         | --   |
| CakTpSSR01380 | CakTC23736 | (GA)12  | 1372 | 1395 | CrTpSSR02737 | CrTC30573 | (GA)10  | 822  | 841  | 2 | --         | --   |
| CakTpSSR01394 | CakTC23803 | (TGA)15 | 3735 | 3779 | CrTpSSR00549 | CrTC05319 | (TGA)6  | 759  | 776  | 9 | --         | --   |
| CakTpSSR01416 | CakTC23917 | (AT)6   | 924  | 935  | CrTpSSR03092 | CrTC33778 | (AT)8   | 822  | 837  | 2 | --         | --   |
| CakTpSSR01420 | CakTC23970 | (AT)7   | 561  | 574  | CrTpSSR03314 | CrTC35241 | (AT)8   | 725  | 740  | 1 | --         | --   |
| CakTpSSR01438 | CakTC24159 | (CT)6   | 170  | 181  | CrTpSSR00795 | CrTC07777 | (CT)7   | 184  | 197  | 1 | Shoot      | --   |
| CakTpSSR01442 | CakTC24186 | (TC)7   | 1119 | 1132 | CrTpSSR01095 | CrTC10632 | (TC)9   | 1097 | 1114 | 2 | --         | --   |
| CakTpSSR01445 | CakTC24242 | (CAT)6  | 330  | 347  | CrTpSSR01786 | CrTC18076 | (CAT)5  | 301  | 315  | 1 | --         | --   |
| CakTpSSR01459 | CakTC24330 | (TAT)7  | 202  | 222  | CrTpSSR01673 | CrTC16817 | (TAT)5  | 338  | 352  | 2 | --         | --   |
| CakTpSSR01464 | CakTC24351 | (TC)15  | 93   | 122  | CrTpSSR01382 | CrTC13636 | (TC)7   | 83   | 96   | 8 | Young_pod  | --   |
| CakTpSSR01466 | CakTC24360 | (TC)9   | 807  | 824  | CrTpSSR01562 | CrTC15709 | (TC)12  | 158  | 181  | 3 | --         | --   |
| CakTpSSR01476 | CakTC24450 | (CT)6   | 60   | 71   | CrTpSSR00888 | CrTC08610 | (CT)7   | 14   | 27   | 1 | --         | --   |
| CakTpSSR01484 | CakTC24510 | (CT)11  | 97   | 118  | CrTpSSR00332 | CrTC03110 | (CT)14  | 93   | 120  | 3 | --         | --   |
| CakTpSSR01486 | CakTC24535 | (TGGA)8 | 862  | 893  | CrTpSSR03038 | CrTC33176 | (TGGA)6 | 739  | 762  | 2 | --         | --   |
| CakTpSSR01513 | CakTC24719 | (AG)8   | 1062 | 1077 | CrTpSSR00230 | CrTC02353 | (AG)7   | 1056 | 1069 | 1 | --         | bZIP |
| CakTpSSR01517 | CakTC24768 | (CTT)6  | 1055 | 1072 | CrTpSSR00285 | CrTC02666 | (CTT)5  | 366  | 380  | 1 | --         | --   |
| CakTpSSR01528 | CakTC24819 | (TA)8   | 432  | 447  | CrTpSSR02242 | CrTC24354 | (TA)6   | 431  | 442  | 2 | Flower bud | --   |
| CakTpSSR01529 | CakTC24824 | (TA)8   | 3424 | 3439 | CrTpSSR02569 | CrTC29014 | (TA)6   | 3293 | 3304 | 2 | --         | MYB  |
| CakTpSSR01543 | CakTC24908 | (GAA)6  | 1431 | 1448 | CrTpSSR02527 | CrTC28629 | (GAA)7  | 457  | 477  | 1 | --         | --   |
| CakTpSSR01558 | CakTC25026 | (ATA)6  | 2550 | 2567 | CrTpSSR00300 | CrTC02769 | (ATA)5  | 719  | 733  | 1 | --         | --   |
| CakTpSSR01566 | CakTC25052 | (TC)8   | 15   | 30   | CrTpSSR02587 | CrTC29215 | (TC)9   | 1    | 18   | 1 | --         | LUG  |
| CakTpSSR01584 | CakTC25189 | (TA)10  | 121  | 140  | CrTpSSR00607 | CrTC06025 | (TA)6   | 43   | 54   | 4 | --         | MYB  |
| CakTpSSR01585 | CakTC25190 | (TC)6   | 497  | 508  | CrTpSSR00707 | CrTC06924 | (TC)8   | 517  | 532  | 2 | --         | --   |
| CakTpSSR01596 | CakTC25236 | (AAT)11 | 295  | 327  | CrTpSSR01098 | CrTC10664 | (AAT)5  | 166  | 180  | 6 | --         | bZIP |
| CakTpSSR01599 | CakTC25253 | (GAA)6  | 2817 | 2834 | CrTpSSR00053 | CrTC00648 | (GAA)5  | 710  | 724  | 1 | Flower bud | --   |
| CakTpSSR01610 | CakTC25336 | (GCT)6  | 1647 | 1664 | CrTpSSR02539 | CrTC28750 | (GCT)7  | 1600 | 1620 | 1 | --         | --   |
| CakTpSSR01617 | CakTC25381 | (AG)7   | 898  | 911  | CrTpSSR01715 | CrTC17326 | (AG)9   | 1048 | 1065 | 2 | --         | --   |
| CakTpSSR01621 | CakTC25414 | (TCT)9  | 20   | 46   | CrTpSSR03428 | CrTC36527 | (TCT)6  | 10   | 27   | 3 | --         | --   |
| CakTpSSR01623 | CakTC25440 | (CTT)6  | 2020 | 2037 | CrTpSSR02927 | CrTC32187 | (CTT)5  | 1972 | 1986 | 1 | --         | --   |
| CakTpSSR01634 | CakTC25472 | (CTT)6  | 1139 | 1156 | CrTpSSR00541 | CrTC05156 | (CTT)5  | 1216 | 1230 | 1 | --         | --   |
| CakTpSSR01638 | CakTC25493 | (TC)8   | 221  | 236  | CrTpSSR00819 | CrTC07974 | (TC)12  | 152  | 175  | 4 | --         | --   |
| CakTpSSR01645 | CakTC25520 | (GGT)7  | 1324 | 1344 | CrTpSSR00026 | CrTC00377 | (GGT)5  | 1276 | 1290 | 2 | --         | --   |
| CakTpSSR01646 | CakTC25526 | (AG)10  | 1435 | 1454 | CrTpSSR02692 | CrTC30220 | (AG)7   | 1082 | 1095 | 3 | --         | --   |
| CakTpSSR01652 | CakTC25542 | (ATTC)5 | 278  | 297  | CrTpSSR02796 | CrTC31047 | (ATTC)6 | 98   | 121  | 1 | --         | --   |

|               |            |         |      |      |              |           |         |      |      |    |            |             |
|---------------|------------|---------|------|------|--------------|-----------|---------|------|------|----|------------|-------------|
| CakTpSSR01653 | CakTC25543 | (TTA)8  | 612  | 635  | CrTpSSR00773 | CrTC07601 | (TTA)11 | 609  | 641  | 3  | --         | HB          |
| CakTpSSR01658 | CakTC25580 | (CA)6   | 2260 | 2271 | CrTpSSR00973 | CrTC09486 | (CA)7   | 2065 | 2078 | 1  | --         | --          |
| CakTpSSR01687 | CakTC25676 | (TA)9   | 1738 | 1755 | CrTpSSR02483 | CrTC28122 | (TA)6   | 62   | 73   | 3  | --         | --          |
| CakTpSSR01697 | CakTC25721 | (TCA)7  | 1571 | 1591 | CrTpSSR01655 | CrTC16621 | (TCA)6  | 1727 | 1744 | 1  | --         | --          |
| CakTpSSR01720 | CakTC25855 | (TAA)11 | 46   | 78   | CrTpSSR00725 | CrTC07153 | (TAA)8  | 481  | 504  | 3  | --         | --          |
| CakTpSSR01724 | CakTC25887 | (AG)7   | 1024 | 1037 | CrTpSSR03384 | CrTC36025 | (AG)6   | 1005 | 1016 | 1  | --         | --          |
| CakTpSSR01731 | CakTC25914 | (TTC)6  | 181  | 198  | CrTpSSR03180 | CrTC34343 | (TTC)7  | 144  | 164  | 1  | --         | --          |
| CakTpSSR01735 | CakTC25926 | (GAA)5  | 935  | 949  | CrTpSSR01751 | CrTC17790 | (GAA)8  | 857  | 880  | 3  | --         | --          |
| CakTpSSR01741 | CakTC25970 | (TTA)5  | 813  | 827  | CrTpSSR00130 | CrTC01443 | (TTA)6  | 2243 | 2260 | 1  | --         | --          |
| CakTpSSR01760 | CakTC26053 | (TGA)6  | 2692 | 2709 | CrTpSSR00920 | CrTC09014 | (TGA)7  | 1153 | 1173 | 1  | --         | --          |
| CakTpSSR01763 | CakTC26074 | (CA)10  | 125  | 144  | CrTpSSR00124 | CrTC01403 | (CA)7   | 65   | 78   | 3  | --         | --          |
| CakTpSSR01768 | CakTC26103 | (AT)7   | 3585 | 3598 | CrTpSSR03230 | CrTC34681 | (AT)8   | 3583 | 3598 | 1  | --         | --          |
| CakTpSSR01791 | CakTC26263 | (TGG)8  | 276  | 299  | CrTpSSR03335 | CrTC35472 | (TGG)7  | 272  | 292  | 1  | --         | --          |
| CakTpSSR01796 | CakTC26298 | (GA)6   | 29   | 40   | CrTpSSR00568 | CrTC05565 | (GA)9   | 2822 | 2839 | 3  | --         | --          |
| CakTpSSR01806 | CakTC26354 | (AT)9   | 36   | 53   | CrTpSSR01625 | CrTC16336 | (AT)6   | 96   | 107  | 3  | --         | --          |
| CakTpSSR01807 | CakTC26361 | (GA)11  | 1518 | 1539 | CrTpSSR00212 | CrTC02249 | (GA)9   | 1473 | 1490 | 2  | --         | --          |
| CakTpSSR01810 | CakTC26397 | (TC)8   | 46   | 61   | CrTpSSR03011 | CrTC32869 | (TC)7   | 12   | 25   | 1  | --         | --          |
| CakTpSSR01815 | CakTC26433 | (AG)6   | 3117 | 3128 | CrTpSSR01099 | CrTC10666 | (AG)8   | 472  | 487  | 2  | --         | --          |
| CakTpSSR01820 | CakTC26448 | (GAT)8  | 3428 | 3451 | CrTpSSR01135 | CrTC10945 | (GAT)6  | 3459 | 3476 | 2  | --         | --          |
| CakTpSSR01835 | CakTC26513 | (CTT)9  | 186  | 212  | CrTpSSR02940 | CrTC32348 | (CTT)8  | 79   | 102  | 1  | --         | G2-like     |
| CakTpSSR01839 | CakTC26519 | (AT)14  | 1932 | 1959 | CrTpSSR02802 | CrTC31091 | (AT)13  | 1852 | 1877 | 1  | --         | --          |
| CakTpSSR01850 | CakTC26583 | (AAG)7  | 2064 | 2084 | CrTpSSR02564 | CrTC28994 | (AAG)8  | 2064 | 2087 | 1  | --         | --          |
| CakTpSSR01851 | CakTC26595 | (GAA)9  | 2021 | 2047 | CrTpSSR02884 | CrTC31756 | (GAA)6  | 556  | 573  | 3  | --         | --          |
| CakTpSSR01852 | CakTC26596 | (GAA)9  | 1074 | 1100 | CrTpSSR03313 | CrTC35239 | (GAA)6  | 1075 | 1092 | 3  | --         | --          |
| CakTpSSR01866 | CakTC26719 | (TC)9   | 210  | 227  | CrTpSSR01287 | CrTC12711 | (TC)6   | 191  | 202  | 3  | --         | --          |
| CakTpSSR01878 | CakTC26856 | (AT)6   | 47   | 58   | CrTpSSR01327 | CrTC13124 | (AT)7   | 830  | 843  | 1  | Flower bud | WRKY        |
| CakTpSSR01891 | CakTC26937 | (TAT)6  | 658  | 675  | CrTpSSR02588 | CrTC29217 | (TAT)8  | 176  | 199  | 2  | --         | --          |
| CakTpSSR01892 | CakTC26942 | (AAG)6  | 3080 | 3097 | CrTpSSR00267 | CrTC02580 | (AAG)5  | 316  | 330  | 1  | --         | MYB-related |
| CakTpSSR01919 | CakTC27102 | (AT)6   | 172  | 183  | CrTpSSR03005 | CrTC32850 | (AT)7   | 95   | 108  | 1  | --         | --          |
| CakTpSSR01928 | CakTC27222 | (CT)13  | 1776 | 1801 | CrTpSSR03304 | CrTC35185 | (CT)12  | 1730 | 1753 | 1  | --         | --          |
| CakTpSSR01939 | CakTC27260 | (AT)6   | 411  | 422  | CrTpSSR02913 | CrTC32093 | (AT)8   | 2    | 17   | 2  | --         | --          |
| CakTpSSR01947 | CakTC27286 | (TC)22  | 215  | 258  | CrTpSSR02131 | CrTC22805 | (TC)6   | 120  | 131  | 16 | --         | --          |
| CakTpSSR01953 | CakTC27334 | (CAG)7  | 2209 | 2229 | CrTpSSR00125 | CrTC01406 | (CAG)6  | 2385 | 2402 | 1  | --         | C3H         |
| CakTpSSR01954 | CakTC27335 | (TC)12  | 81   | 104  | CrTpSSR00747 | CrTC07366 | (TC)7   | 46   | 59   | 5  | --         | bZIP        |
| CakTpSSR01955 | CakTC27335 | (CAG)5  | 1372 | 1386 | CrTpSSR00748 | CrTC07366 | (CAG)6  | 1324 | 1341 | 1  | --         | bZIP        |
| CakTpSSR01961 | CakTC27355 | (AG)12  | 30   | 53   | CrTpSSR02497 | CrTC28341 | (AG)9   | 2    | 19   | 3  | --         | --          |
| CakTpSSR01996 | CakTC27620 | (CT)17  | 157  | 190  | CrTpSSR02847 | CrTC31430 | (CT)8   | 164  | 179  | 9  | --         | --          |
| CakTpSSR02007 | CakTC27686 | (GAA)6  | 1157 | 1174 | CrTpSSR00591 | CrTC05790 | (GAA)5  | 1136 | 1150 | 1  | --         | --          |
| CakTpSSR02010 | CakTC27697 | (TAA)6  | 231  | 248  | CrTpSSR01572 | CrTC15813 | (TAA)8  | 22   | 45   | 2  | --         | --          |
| CakTpSSR02013 | CakTC27717 | (TG)7   | 1016 | 1029 | CrTpSSR03198 | CrTC34482 | (TG)6   | 1085 | 1096 | 1  | --         | --          |

|               |            |         |      |      |              |           |         |      |      |    |            |      |
|---------------|------------|---------|------|------|--------------|-----------|---------|------|------|----|------------|------|
| CakTpSSR02017 | CakTC27750 | (ACA)8  | 140  | 163  | CrTpSSR02511 | CrTC28514 | (ACA)5  | 98   | 112  | 3  | --         | --   |
| CakTpSSR02032 | CakTC27891 | (CT)6   | 25   | 36   | CrTpSSR01637 | CrTC16501 | (CT)7   | 25   | 38   | 1  | --         | --   |
| CakTpSSR02033 | CakTC27891 | (TCC)7  | 2000 | 2020 | CrTpSSR01638 | CrTC16501 | (TCC)5  | 1949 | 1963 | 2  | --         | --   |
| CakTpSSR02055 | CakTC27985 | (AT)6   | 2922 | 2933 | CrTpSSR02766 | CrTC30838 | (AT)7   | 83   | 96   | 1  | --         | --   |
| CakTpSSR02063 | CakTC28067 | (AG)16  | 1304 | 1335 | CrTpSSR02761 | CrTC30819 | (AG)7   | 1227 | 1240 | 9  | --         | --   |
| CakTpSSR02074 | CakTC28116 | (GTG)8  | 1614 | 1637 | CrTpSSR02852 | CrTC31458 | (GTG)5  | 1614 | 1628 | 3  | --         | --   |
| CakTpSSR02089 | CakTC28242 | (TCCT)8 | 2595 | 2626 | CrTpSSR00175 | CrTC02011 | (TCCT)9 | 1416 | 1451 | 1  | --         | --   |
| CakTpSSR02093 | CakTC28270 | (AGA)7  | 334  | 354  | CrTpSSR02495 | CrTC28282 | (AGA)8  | 252  | 275  | 1  | --         | WRKY |
| CakTpSSR02109 | CakTC28354 | (AG)10  | 3710 | 3729 | CrTpSSR02308 | CrTC25571 | (AG)6   | 419  | 430  | 4  | --         | --   |
| CakTpSSR02110 | CakTC28366 | (CT)8   | 67   | 82   | CrTpSSR01061 | CrTC10376 | (CT)10  | 39   | 58   | 2  | --         | --   |
| CakTpSSR02137 | CakTC28459 | (GAA)11 | 1152 | 1184 | CrTpSSR02644 | CrTC29725 | (GAA)7  | 1077 | 1097 | 4  | --         | --   |
| CakTpSSR02143 | CakTC28476 | (GAA)6  | 1470 | 1487 | CrTpSSR01110 | CrTC10786 | (GAA)8  | 1189 | 1212 | 2  | --         | --   |
| CakTpSSR02149 | CakTC28528 | (AG)16  | 760  | 791  | CrTpSSR02590 | CrTC29239 | (AG)15  | 565  | 594  | 1  | --         | --   |
| CakTpSSR02154 | CakTC28584 | (TAT)6  | 168  | 185  | CrTpSSR02309 | CrTC25581 | (TAT)7  | 71   | 91   | 1  | --         | --   |
| CakTpSSR02184 | CakTC28798 | (CCA)7  | 370  | 390  | CrTpSSR02837 | CrTC31369 | (CCA)6  | 254  | 271  | 1  | --         | C3H  |
| CakTpSSR02186 | CakTC28800 | (TTC)7  | 604  | 624  | CrTpSSR00534 | CrTC05084 | (TTC)5  | 722  | 736  | 2  | Flower bud | --   |
| CakTpSSR02191 | CakTC28822 | (TGT)7  | 885  | 905  | CrTpSSR03354 | CrTC35736 | (TGT)5  | 897  | 911  | 2  | --         | --   |
| CakTpSSR02194 | CakTC28834 | (AAG)6  | 523  | 540  | CrTpSSR00574 | CrTC05629 | (AAG)7  | 137  | 157  | 1  | --         | --   |
| CakTpSSR02205 | CakTC28918 | (AG)6   | 2    | 13   | CrTpSSR01062 | CrTC10383 | (AG)7   | 275  | 288  | 1  | --         | --   |
| CakTpSSR02212 | CakTC28936 | (TC)8   | 44   | 59   | CrTpSSR03298 | CrTC35145 | (TC)7   | 69   | 82   | 1  | --         | --   |
| CakTpSSR02222 | CakTC29000 | (TTC)10 | 171  | 200  | CrTpSSR02479 | CrTC28082 | (TTC)5  | 53   | 67   | 5  | --         | --   |
| CakTpSSR02229 | CakTC29036 | (CT)9   | 1    | 18   | CrTpSSR03211 | CrTC34563 | (CT)8   | 1    | 16   | 1  | --         | --   |
| CakTpSSR02234 | CakTC29049 | (AG)10  | 2115 | 2134 | CrTpSSR00788 | CrTC07718 | (AG)9   | 2012 | 2029 | 1  | --         | TCP  |
| CakTpSSR02247 | CakTC29149 | (GA)8   | 1148 | 1163 | CrTpSSR02048 | CrTC21586 | (GA)6   | 1214 | 1225 | 2  | --         | --   |
| CakTpSSR02254 | CakTC29183 | (GAA)6  | 48   | 65   | CrTpSSR01618 | CrTC16298 | (GAA)7  | 2    | 22   | 1  | --         | --   |
| CakTpSSR02270 | CakTC29328 | (AG)6   | 14   | 25   | CrTpSSR00939 | CrTC09178 | (AG)11  | 194  | 215  | 5  | --         | --   |
| CakTpSSR02281 | CakTC29415 | (GCA)5  | 1512 | 1526 | CrTpSSR02919 | CrTC32120 | (GCA)6  | 533  | 550  | 1  | Shoot      | --   |
| CakTpSSR02328 | CakTC29615 | (AG)10  | 2269 | 2288 | CrTpSSR02068 | CrTC21914 | (AG)8   | 76   | 91   | 2  | --         | --   |
| CakTpSSR02350 | CakTC29831 | (AG)8   | 105  | 120  | CrTpSSR02642 | CrTC29717 | (AG)9   | 61   | 78   | 1  | --         | --   |
| CakTpSSR02356 | CakTC29856 | (TCA)5  | 2384 | 2398 | CrTpSSR00673 | CrTC06623 | (TCA)6  | 2381 | 2398 | 1  | --         | --   |
| CakTpSSR02363 | CakTC29895 | (TCT)7  | 113  | 133  | CrTpSSR03234 | CrTC34697 | (TCT)5  | 106  | 120  | 2  | --         | --   |
| CakTpSSR02381 | CakTC29965 | (TC)20  | 22   | 61   | CrTpSSR00976 | CrTC09549 | (TC)10  | 41   | 60   | 10 | --         | HB   |
| CakTpSSR02387 | CakTC29981 | (AGA)8  | 2245 | 2268 | CrTpSSR02795 | CrTC31035 | (AGA)7  | 2235 | 2255 | 1  | --         | --   |
| CakTpSSR02393 | CakTC30018 | (TA)6   | 2019 | 2030 | CrTpSSR03300 | CrTC35166 | (TA)9   | 1799 | 1816 | 3  | --         | --   |
| CakTpSSR02396 | CakTC30029 | (TA)10  | 55   | 74   | CrTpSSR00691 | CrTC06808 | (TA)6   | 41   | 52   | 4  | Root       | --   |
| CakTpSSR02399 | CakTC30033 | (AG)10  | 1096 | 1115 | CrTpSSR02893 | CrTC31867 | (AG)6   | 554  | 565  | 4  | --         | --   |
| CakTpSSR02406 | CakTC30071 | (AAG)5  | 70   | 84   | CrTpSSR01047 | CrTC10269 | (AAG)6  | 71   | 88   | 1  | --         | --   |
| CakTpSSR02409 | CakTC30080 | (CT)12  | 124  | 147  | CrTpSSR00741 | CrTC07300 | (CT)6   | 129  | 140  | 6  | --         | --   |
| CakTpSSR02438 | CakTC30280 | (AT)12  | 762  | 785  | CrTpSSR02572 | CrTC29031 | (AT)9   | 658  | 675  | 3  | --         | --   |
| CakTpSSR02450 | CakTC30327 | (GTT)7  | 1574 | 1594 | CrTpSSR01674 | CrTC16840 | (GTT)8  | 1590 | 1613 | 1  | --         | --   |

|               |            |         |      |      |              |           |         |      |      |    |            |             |
|---------------|------------|---------|------|------|--------------|-----------|---------|------|------|----|------------|-------------|
| CakTpSSR02457 | CakTC30360 | (AAT)6  | 5    | 22   | CrTpSSR00985 | CrTC09662 | (AAT)7  | 22   | 42   | 1  | --         | --          |
| CakTpSSR02460 | CakTC30386 | (CAA)8  | 326  | 349  | CrTpSSR00392 | CrTC03684 | (CAA)10 | 352  | 381  | 2  | Young_pod  | --          |
| CakTpSSR02481 | CakTC30527 | (CT)6   | 77   | 88   | CrTpSSR02502 | CrTC28419 | (CT)9   | 78   | 95   | 3  | --         | --          |
| CakTpSSR02484 | CakTC30570 | (AAG)6  | 45   | 62   | CrTpSSR02964 | CrTC32557 | (AAG)7  | 26   | 46   | 1  | --         | bZIP        |
| CakTpSSR02487 | CakTC30587 | (AT)16  | 271  | 302  | CrTpSSR02228 | CrTC24094 | (AT)15  | 266  | 295  | 1  | --         | --          |
| CakTpSSR02497 | CakTC30675 | (AT)7   | 183  | 196  | CrTpSSR00127 | CrTC01426 | (AT)6   | 556  | 567  | 1  | --         | --          |
| CakTpSSR02500 | CakTC30701 | (TA)13  | 109  | 134  | CrTpSSR01743 | CrTC17664 | (TA)15  | 230  | 259  | 2  | --         | --          |
| CakTpSSR02504 | CakTC30713 | (ATA)5  | 794  | 808  | CrTpSSR02215 | CrTC23939 | (ATA)6  | 802  | 819  | 1  | --         | SRS         |
| CakTpSSR02507 | CakTC30740 | (AAT)6  | 1744 | 1761 | CrTpSSR00655 | CrTC06481 | (AAT)5  | 1060 | 1074 | 1  | --         | --          |
| CakTpSSR02508 | CakTC30741 | (GAA)5  | 1684 | 1698 | CrTpSSR01849 | CrTC18900 | (GAA)6  | 1522 | 1539 | 1  | --         | --          |
| CakTpSSR02515 | CakTC30781 | (CAA)5  | 184  | 198  | CrTpSSR00698 | CrTC06853 | (CAA)6  | 222  | 239  | 1  | --         | --          |
| CakTpSSR02517 | CakTC30793 | (GGC)5  | 134  | 148  | CrTpSSR02524 | CrTC28607 | (GGC)7  | 90   | 110  | 2  | --         | --          |
| CakTpSSR02531 | CakTC30883 | (TC)9   | 227  | 244  | CrTpSSR01634 | CrTC16487 | (TC)10  | 220  | 239  | 1  | --         | --          |
| CakTpSSR02535 | CakTC30906 | (AAC)8  | 1235 | 1258 | CrTpSSR00799 | CrTC07810 | (AAC)7  | 1041 | 1061 | 1  | --         | GRAS        |
| CakTpSSR02539 | CakTC30929 | (GAA)8  | 227  | 250  | CrTpSSR03090 | CrTC33767 | (GAA)7  | 193  | 213  | 1  | --         | G2-like     |
| CakTpSSR02542 | CakTC30945 | (TG)9   | 514  | 531  | CrTpSSR01475 | CrTC14581 | (TG)8   | 513  | 528  | 1  | --         | --          |
| CakTpSSR02551 | CakTC30998 | (TA)8   | 1084 | 1099 | CrTpSSR00458 | CrTC04417 | (TA)9   | 1095 | 1112 | 1  | --         | MYB-related |
| CakTpSSR02560 | CakTC31034 | (AAC)7  | 626  | 646  | CrTpSSR02374 | CrTC26729 | (AAC)6  | 552  | 569  | 1  | --         | --          |
| CakTpSSR02576 | CakTC31109 | (GT)12  | 2140 | 2163 | CrTpSSR01940 | CrTC20330 | (GT)6   | 29   | 40   | 6  | --         | --          |
| CakTpSSR02598 | CakTC31216 | (GAA)7  | 2425 | 2445 | CrTpSSR02866 | CrTC31572 | (GAA)5  | 2439 | 2453 | 2  | --         | HB          |
| CakTpSSR02602 | CakTC31260 | (TC)9   | 3681 | 3698 | CrTpSSR02361 | CrTC26419 | (TC)8   | 687  | 702  | 1  | --         | --          |
| CakTpSSR02606 | CakTC31295 | (GA)8   | 15   | 30   | CrTpSSR01919 | CrTC19924 | (GA)6   | 6    | 17   | 2  | --         | --          |
| CakTpSSR02609 | CakTC31305 | (TCT)7  | 64   | 84   | CrTpSSR01303 | CrTC12815 | (TCT)10 | 202  | 231  | 3  | --         | --          |
| CakTpSSR02622 | CakTC31433 | (GT)12  | 3927 | 3950 | CrTpSSR02085 | CrTC22238 | (GT)9   | 2032 | 2049 | 3  | --         | --          |
| CakTpSSR02637 | CakTC31492 | (GATA)7 | 1607 | 1634 | CrTpSSR02841 | CrTC31392 | (GATA)8 | 649  | 680  | 1  | --         | --          |
| CakTpSSR02655 | CakTC31576 | (AAG)6  | 1455 | 1472 | CrTpSSR01911 | CrTC19808 | (AAG)7  | 572  | 592  | 1  | --         | --          |
| CakTpSSR02658 | CakTC31612 | (GA)20  | 2035 | 2074 | CrTpSSR01482 | CrTC14686 | (GA)29  | 2065 | 2122 | 9  | --         | --          |
| CakTpSSR02667 | CakTC31656 | (CTT)5  | 64   | 78   | CrTpSSR00050 | CrTC00615 | (CTT)6  | 457  | 474  | 1  | --         | --          |
| CakTpSSR02670 | CakTC31682 | (TTA)6  | 165  | 182  | CrTpSSR01557 | CrTC15635 | (TTA)8  | 60   | 83   | 2  | --         | ARR-B       |
| CakTpSSR02673 | CakTC31693 | (AC)13  | 1328 | 1353 | CrTpSSR00617 | CrTC06095 | (AC)12  | 1371 | 1394 | 1  | --         | --          |
| CakTpSSR02687 | CakTC31756 | (AAT)5  | 305  | 319  | CrTpSSR00688 | CrTC06781 | (AAT)6  | 41   | 58   | 1  | Flower bud | bZIP        |
| CakTpSSR02696 | CakTC31803 | (TGA)6  | 666  | 683  | CrTpSSR02281 | CrTC25030 | (TGA)5  | 767  | 781  | 1  | --         | Trihelix    |
| CakTpSSR02706 | CakTC31866 | (AG)18  | 2317 | 2352 | CrTpSSR00303 | CrTC02808 | (AG)8   | 2456 | 2471 | 10 | --         | --          |
| CakTpSSR02717 | CakTC32005 | (TA)6   | 48   | 59   | CrTpSSR01889 | CrTC19446 | (TA)11  | 1189 | 1210 | 5  | --         | --          |
| CakTpSSR02719 | CakTC32010 | (CAG)5  | 1224 | 1238 | CrTpSSR02388 | CrTC26958 | (CAG)6  | 1023 | 1040 | 1  | --         | --          |
| CakTpSSR02722 | CakTC32021 | (TC)12  | 15   | 38   | CrTpSSR01932 | CrTC20146 | (TC)10  | 56   | 75   | 2  | --         | --          |
| CakTpSSR02728 | CakTC32074 | (AT)6   | 2232 | 2243 | CrTpSSR02120 | CrTC22719 | (AT)8   | 1122 | 1137 | 2  | --         | --          |
| CakTpSSR02735 | CakTC32111 | (AG)7   | 323  | 336  | CrTpSSR01170 | CrTC11275 | (AG)6   | 323  | 334  | 1  | --         | --          |
| CakTpSSR02738 | CakTC32132 | (AG)6   | 401  | 412  | CrTpSSR00412 | CrTC03983 | (AG)7   | 400  | 413  | 1  | Root       | --          |
| CakTpSSR02747 | CakTC32148 | (TAT)5  | 614  | 628  | CrTpSSR02021 | CrTC21218 | (TAT)12 | 99   | 134  | 7  | --         | MYB         |

|               |            |           |      |      |              |           |           |      |      |   |             |     |
|---------------|------------|-----------|------|------|--------------|-----------|-----------|------|------|---|-------------|-----|
| CakTpSSR02755 | CakTC32189 | (AT)6     | 130  | 141  | CrTpSSR02416 | CrTC27250 | (AT)7     | 132  | 145  | 1 | --          | --  |
| CakTpSSR02759 | CakTC32218 | (CT)8     | 261  | 276  | CrTpSSR01282 | CrTC12620 | (CT)6     | 282  | 293  | 2 | --          | --  |
| CakTpSSR02780 | CakTC32284 | (AAC)5    | 127  | 141  | CrTpSSR03184 | CrTC34367 | (AAC)7    | 103  | 123  | 2 | --          | --  |
| CakTpSSR02785 | CakTC32314 | (TCT)10   | 46   | 75   | CrTpSSR03111 | CrTC33865 | (TCT)9    | 46   | 72   | 1 | --          | --  |
| CakTpSSR02795 | CakTC32348 | (CCA)6    | 3717 | 3734 | CrTpSSR01999 | CrTC21060 | (CCA)7    | 1224 | 1244 | 1 | --          | --  |
| CakTpSSR02798 | CakTC32366 | (GT)12    | 4192 | 4215 | CrTpSSR00852 | CrTC08282 | (GT)8     | 4153 | 4168 | 4 | --          | --  |
| CakTpSSR02801 | CakTC32389 | (CTT)8    | 51   | 74   | CrTpSSR03301 | CrTC35168 | (CTT)7    | 52   | 72   | 1 | --          | --  |
| CakTpSSR02807 | CakTC32456 | (TGA)7    | 1945 | 1965 | CrTpSSR00061 | CrTC00729 | (TGA)8    | 509  | 532  | 1 | --          | --  |
| CakTpSSR02813 | CakTC32488 | (CTT)8    | 1662 | 1685 | CrTpSSR00532 | CrTC05076 | (CTT)7    | 1618 | 1638 | 1 | --          | TCP |
| CakTpSSR02816 | CakTC32496 | (TTC)6    | 603  | 620  | CrTpSSR00827 | CrTC08019 | (TTC)7    | 622  | 642  | 1 | --          | LOB |
| CakTpSSR02827 | CakTC32595 | (ATT)15   | 1821 | 1865 | CrTpSSR02790 | CrTC31018 | (ATT)9    | 1809 | 1835 | 6 | --          | --  |
| CakTpSSR02831 | CakTC32630 | (GA)9     | 541  | 558  | CrTpSSR03341 | CrTC35571 | (GA)11    | 456  | 477  | 2 | --          | --  |
| CakTpSSR02847 | CakTC32729 | (AAT)9    | 2045 | 2071 | CrTpSSR03212 | CrTC34574 | (AAT)6    | 2105 | 2122 | 3 | --          | --  |
| CakTpSSR02863 | CakTC32818 | (AG)8     | 472  | 487  | CrTpSSR03097 | CrTC33785 | (AG)10    | 454  | 473  | 2 | --          | --  |
| CakTpSSR02868 | CakTC32878 | (TTCTG)6  | 565  | 594  | CrTpSSR02311 | CrTC25684 | (TTCTG)5  | 517  | 541  | 1 | --          | --  |
| CakTpSSR02869 | CakTC32879 | (TA)10    | 411  | 430  | CrTpSSR01597 | CrTC16066 | (TA)6     | 20   | 31   | 4 | --          | --  |
| CakTpSSR02880 | CakTC32991 | (CTA)5    | 153  | 167  | CrTpSSR03085 | CrTC33698 | (CTA)8    | 221  | 244  | 3 | --          | --  |
| CakTpSSR02891 | CakTC33039 | (TCT)11   | 266  | 298  | CrTpSSR00969 | CrTC09454 | (TCT)9    | 262  | 288  | 2 | --          | --  |
| CakTpSSR02902 | CakTC33129 | (GT)7     | 2330 | 2343 | CrTpSSR00007 | CrTC00075 | (GT)8     | 796  | 811  | 1 | Mature Leaf | --  |
| CakTpSSR02905 | CakTC33153 | (TTC)6    | 17   | 34   | CrTpSSR01635 | CrTC16489 | (TTC)5    | 53   | 67   | 1 | --          | --  |
| CakTpSSR02920 | CakTC33240 | (AG)10    | 1956 | 1975 | CrTpSSR03210 | CrTC34561 | (AG)8     | 1958 | 1973 | 2 | --          | --  |
| CakTpSSR02926 | CakTC33266 | (GTG)6    | 2186 | 2203 | CrTpSSR02928 | CrTC32192 | (GTG)5    | 2188 | 2202 | 1 | --          | --  |
| CakTpSSR02934 | CakTC33310 | (AT)7     | 2236 | 2249 | CrTpSSR00604 | CrTC05969 | (AT)6     | 2247 | 2258 | 1 | --          | --  |
| CakTpSSR02936 | CakTC33339 | (CTT)5    | 1933 | 1947 | CrTpSSR02286 | CrTC25081 | (CTT)6    | 221  | 238  | 1 | --          | --  |
| CakTpSSR02939 | CakTC33354 | (AAT)5    | 656  | 670  | CrTpSSR02278 | CrTC24980 | (AAT)8    | 645  | 668  | 3 | --          | --  |
| CakTpSSR02953 | CakTC33459 | (AC)6     | 295  | 306  | CrTpSSR03026 | CrTC33054 | (AC)7     | 294  | 307  | 1 | --          | --  |
| CakTpSSR02957 | CakTC33510 | (GGC)6    | 639  | 656  | CrTpSSR00718 | CrTC07045 | (GGC)5    | 92   | 106  | 1 | --          | --  |
| CakTpSSR02974 | CakTC33656 | (CT)7     | 108  | 121  | CrTpSSR00381 | CrTC03602 | (CT)6     | 106  | 117  | 1 | --          | --  |
| CakTpSSR02982 | CakTC33720 | (GA)10    | 6926 | 6945 | CrTpSSR02149 | CrTC23039 | (GA)8     | 1320 | 1335 | 2 | --          | --  |
| CakTpSSR02984 | CakTC33731 | (TC)9     | 61   | 78   | CrTpSSR03252 | CrTC34816 | (TC)6     | 1    | 12   | 3 | --          | --  |
| CakTpSSR02987 | CakTC33747 | (CT)8     | 652  | 667  | CrTpSSR00872 | CrTC08423 | (CT)6     | 820  | 831  | 2 | --          | --  |
| CakTpSSR02992 | CakTC33793 | (AG)25    | 2395 | 2444 | CrTpSSR03224 | CrTC34657 | (AG)18    | 2341 | 2376 | 7 | --          | --  |
| CakTpSSR02993 | CakTC33799 | (TTC)6    | 190  | 207  | CrTpSSR00962 | CrTC09412 | (TTC)11   | 187  | 219  | 5 | --          | --  |
| CakTpSSR03003 | CakTC33861 | (TC)6     | 2447 | 2458 | CrTpSSR00422 | CrTC04070 | (TC)7     | 2434 | 2447 | 1 | --          | --  |
| CakTpSSR03019 | CakTC34004 | (ATC)8    | 480  | 503  | CrTpSSR02743 | CrTC30664 | (ATC)7    | 471  | 491  | 1 | --          | --  |
| CakTpSSR03039 | CakTC34158 | (ATG)6    | 230  | 247  | CrTpSSR02934 | CrTC32281 | (ATG)5    | 346  | 360  | 1 | --          | --  |
| CakTpSSR03048 | CakTC34258 | (GCA)5    | 479  | 493  | CrTpSSR01064 | CrTC10400 | (GCA)6    | 534  | 551  | 1 | --          | TPR |
| CakTpSSR03063 | CakTC34364 | (CT)11    | 2202 | 2223 | CrTpSSR01102 | CrTC10702 | (CT)6     | 1940 | 1951 | 5 | --          | --  |
| CakTpSSR03065 | CakTC34377 | (TTCATT)6 | 1713 | 1748 | CrTpSSR01067 | CrTC10423 | (TTCATT)7 | 1388 | 1429 | 1 | --          | --  |
| CakTpSSR03069 | CakTC34394 | (CTT)7    | 618  | 638  | CrTpSSR01949 | CrTC20409 | (CTT)5    | 184  | 198  | 2 | Flower bud  | --  |

|               |            |         |      |      |              |           |         |      |      |    |                |     |
|---------------|------------|---------|------|------|--------------|-----------|---------|------|------|----|----------------|-----|
| CakTpSSR03093 | CakTC34569 | (ATG)6  | 1904 | 1921 | CrTpSSR02135 | CrTC22877 | (ATG)8  | 1915 | 1938 | 2  | --             | --  |
| CakTpSSR03094 | CakTC34582 | (GA)10  | 48   | 67   | CrTpSSR01516 | CrTC15089 | (GA)9   | 35   | 52   | 1  | --             | --  |
| CakTpSSR03099 | CakTC34624 | (AG)10  | 579  | 598  | CrTpSSR01840 | CrTC18757 | (AG)11  | 572  | 593  | 1  | --             | --  |
| CakTpSSR03105 | CakTC34659 | (AAT)8  | 6657 | 6680 | CrTpSSR02560 | CrTC28939 | (AAT)9  | 330  | 356  | 1  | --             | --  |
| CakTpSSR03116 | CakTC34729 | (CTT)10 | 127  | 156  | CrTpSSR01966 | CrTC20578 | (CTT)6  | 168  | 185  | 4  | --             | --  |
| CakTpSSR03117 | CakTC34751 | (AT)10  | 192  | 211  | CrTpSSR02549 | CrTC28823 | (AT)7   | 3437 | 3450 | 3  | --             | --  |
| CakTpSSR03118 | CakTC34754 | (AG)12  | 3280 | 3303 | CrTpSSR03229 | CrTC34679 | (AG)11  | 3305 | 3326 | 1  | --             | --  |
| CakTpSSR03136 | CakTC34866 | (TC)10  | 99   | 118  | CrTpSSR01410 | CrTC13919 | (TC)11  | 95   | 116  | 1  | --             | --  |
| CakTpSSR03162 | CakTC35097 | (ATG)8  | 1316 | 1339 | CrTpSSR01160 | CrTC11205 | (ATG)10 | 1316 | 1345 | 2  | --             | --  |
| CakTpSSR03180 | CakTC35202 | (CT)8   | 21   | 36   | CrTpSSR02153 | CrTC23066 | (CT)7   | 177  | 190  | 1  | --             | --  |
| CakTpSSR03187 | CakTC35240 | (TAT)6  | 3239 | 3256 | CrTpSSR01602 | CrTC16098 | (TAT)5  | 3200 | 3214 | 1  | --             | --  |
| CakTpSSR03196 | CakTC35334 | (AG)7   | 47   | 60   | CrTpSSR00803 | CrTC07826 | (AG)8   | 26   | 41   | 1  | --             | --  |
| CakTpSSR03203 | CakTC35400 | (TCT)7  | 139  | 159  | CrTpSSR03453 | CrTC37082 | (TCT)8  | 188  | 211  | 1  | --             | --  |
| CakTpSSR03213 | CakTC35436 | (TTC)13 | 211  | 249  | CrTpSSR02489 | CrTC28225 | (TTC)5  | 211  | 225  | 8  | --             | --  |
| CakTpSSR03217 | CakTC35460 | (AG)8   | 4080 | 4095 | CrTpSSR03241 | CrTC34743 | (AG)13  | 3982 | 4007 | 5  | --             | --  |
| CakTpSSR03238 | CakTC35635 | (AT)9   | 239  | 256  | CrTpSSR00881 | CrTC08543 | (AT)8   | 2933 | 2948 | 1  | --             | --  |
| CakTpSSR03246 | CakTC35676 | (TCT)6  | 341  | 358  | CrTpSSR01688 | CrTC17059 | (TCT)9  | 330  | 356  | 3  | --             | --  |
| CakTpSSR03248 | CakTC35684 | (CAC)8  | 435  | 458  | CrTpSSR02782 | CrTC30968 | (CAC)6  | 307  | 324  | 2  | --             | SBP |
| CakTpSSR03253 | CakTC35722 | (AGA)6  | 4169 | 4186 | CrTpSSR00498 | CrTC04839 | (AGA)5  | 2188 | 2202 | 1  | Mature<br>Leaf | --  |
| CakTpSSR03257 | CakTC35749 | (TCA)7  | 3068 | 3088 | CrTpSSR00875 | CrTC08452 | (TCA)5  | 3068 | 3082 | 2  | --             | --  |
| CakTpSSR03258 | CakTC35752 | (ATG)6  | 144  | 161  | CrTpSSR02369 | CrTC26688 | (ATG)5  | 108  | 122  | 1  | --             | --  |
| CakTpSSR03266 | CakTC35803 | (ACC)10 | 260  | 289  | CrTpSSR00705 | CrTC06908 | (ACC)9  | 223  | 249  | 1  | --             | --  |
| CakTpSSR03276 | CakTC35891 | (TCT)5  | 382  | 396  | CrTpSSR00917 | CrTC08978 | (TCT)6  | 437  | 454  | 1  | --             | --  |
| CakTpSSR03285 | CakTC35958 | (TAA)7  | 369  | 389  | CrTpSSR01837 | CrTC18712 | (TAA)5  | 321  | 335  | 2  | --             | --  |
| CakTpSSR03294 | CakTC36006 | (GAA)10 | 3113 | 3142 | CrTpSSR03236 | CrTC34708 | (GAA)5  | 3075 | 3089 | 5  | --             | --  |
| CakTpSSR03298 | CakTC36016 | (TCT)7  | 2903 | 2923 | CrTpSSR01855 | CrTC19010 | (TCT)8  | 2840 | 2863 | 1  | --             | --  |
| CakTpSSR03305 | CakTC36060 | (GAA)11 | 141  | 173  | CrTpSSR03032 | CrTC33095 | (GAA)9  | 41   | 67   | 2  | Flower bud     | --  |
| CakTpSSR03308 | CakTC36073 | (GTT)6  | 408  | 425  | CrTpSSR01558 | CrTC15647 | (GTT)5  | 446  | 460  | 1  | --             | --  |
| CakTpSSR03321 | CakTC36201 | (TC)8   | 134  | 149  | CrTpSSR01869 | CrTC19166 | (TC)9   | 124  | 141  | 1  | --             | --  |
| CakTpSSR03332 | CakTC36282 | (TCA)6  | 251  | 268  | CrTpSSR01251 | CrTC12227 | (TCA)9  | 222  | 248  | 3  | --             | --  |
| CakTpSSR03334 | CakTC36288 | (TG)10  | 4675 | 4694 | CrTpSSR02270 | CrTC24793 | (TG)7   | 482  | 495  | 3  | --             | --  |
| CakTpSSR03335 | CakTC36289 | (TCT)6  | 74   | 91   | CrTpSSR03247 | CrTC34769 | (TCT)5  | 48   | 62   | 1  | --             | C3H |
| CakTpSSR03338 | CakTC36306 | (TC)9   | 3047 | 3064 | CrTpSSR03049 | CrTC33238 | (TC)7   | 2944 | 2957 | 2  | --             | --  |
| CakTpSSR03340 | CakTC36329 | (TC)6   | 15   | 26   | CrTpSSR03239 | CrTC34739 | (TC)7   | 1    | 14   | 1  | --             | --  |
| CakTpSSR03355 | CakTC36473 | (CA)9   | 67   | 84   | CrTpSSR00664 | CrTC06571 | (CA)8   | 150  | 165  | 1  | --             | --  |
| CakTpSSR03359 | CakTC36512 | (TA)7   | 435  | 448  | CrTpSSR01084 | CrTC10556 | (TA)21  | 534  | 575  | 14 | --             | --  |
| CakTpSSR03360 | CakTC36519 | (CAT)9  | 358  | 384  | CrTpSSR02394 | CrTC26991 | (CAT)6  | 348  | 365  | 3  | Young_pod      | --  |
| CakTpSSR03365 | CakTC36561 | (AG)6   | 2768 | 2779 | CrTpSSR03256 | CrTC34827 | (AG)8   | 720  | 735  | 2  | --             | --  |
| CakTpSSR03375 | CakTC36662 | (GAT)5  | 265  | 279  | CrTpSSR01656 | CrTC16627 | (GAT)6  | 242  | 259  | 1  | --             | --  |
| CakTpSSR03377 | CakTC36676 | (TC)7   | 418  | 431  | CrTpSSR00790 | CrTC07731 | (TC)8   | 125  | 140  | 1  | --             | --  |

|               |            |         |      |      |              |           |         |      |      |    |            |      |
|---------------|------------|---------|------|------|--------------|-----------|---------|------|------|----|------------|------|
| CakTpSSR03379 | CakTC36721 | (GA)11  | 1    | 22   | CrTpSSR00597 | CrTC05862 | (GA)9   | 44   | 61   | 2  | Young_pod  | --   |
| CakTpSSR03394 | CakTC36828 | (TC)6   | 17   | 28   | CrTpSSR03235 | CrTC34700 | (TC)7   | 1    | 14   | 1  | --         | --   |
| CakTpSSR03395 | CakTC36839 | (GA)7   | 2728 | 2741 | CrTpSSR01963 | CrTC20557 | (GA)9   | 2894 | 2911 | 2  | --         | --   |
| CakTpSSR03396 | CakTC36848 | (TC)7   | 69   | 82   | CrTpSSR03019 | CrTC32952 | (TC)8   | 31   | 46   | 1  | --         | --   |
| CakTpSSR03397 | CakTC36851 | (TC)7   | 489  | 502  | CrTpSSR00615 | CrTC06078 | (TC)6   | 996  | 1007 | 1  | --         | --   |
| CakTpSSR03405 | CakTC36913 | (AG)21  | 2658 | 2699 | CrTpSSR02060 | CrTC21778 | (AG)16  | 2470 | 2501 | 5  | --         | --   |
| CakTpSSR03412 | CakTC36953 | (CAA)7  | 585  | 605  | CrTpSSR02982 | CrTC32679 | (CAA)5  | 580  | 594  | 2  | --         | --   |
| CakTpSSR03414 | CakTC36953 | (AAT)7  | 1669 | 1689 | CrTpSSR02984 | CrTC32679 | (AAT)9  | 1655 | 1681 | 2  | --         | --   |
| CakTpSSR03430 | CakTC37100 | (AT)7   | 5    | 18   | CrTpSSR03068 | CrTC33469 | (AT)6   | 418  | 429  | 1  | Shoot      | --   |
| CakTpSSR03432 | CakTC37103 | (TC)6   | 181  | 192  | CrTpSSR00301 | CrTC02791 | (TC)9   | 218  | 235  | 3  | --         | --   |
| CakTpSSR03433 | CakTC37120 | (AAG)10 | 1480 | 1509 | CrTpSSR02484 | CrTC28142 | (AAG)5  | 1477 | 1491 | 5  | --         | --   |
| CakTpSSR03442 | CakTC37158 | (TCT)10 | 415  | 444  | CrTpSSR03164 | CrTC34220 | (TCT)8  | 257  | 280  | 2  | --         | --   |
| CakTpSSR03443 | CakTC37160 | (CAC)7  | 1084 | 1104 | CrTpSSR02284 | CrTC25069 | (CAC)9  | 1142 | 1168 | 2  | --         | --   |
| CakTpSSR03460 | CakTC37238 | (TC)7   | 23   | 36   | CrTpSSR03189 | CrTC34404 | (TC)6   | 22   | 33   | 1  | --         | --   |
| CakTpSSR03463 | CakTC37251 | (AAT)6  | 1791 | 1808 | CrTpSSR02121 | CrTC22721 | (AAT)7  | 1348 | 1368 | 1  | --         | MYB  |
| CakTpSSR03467 | CakTC37266 | (AG)9   | 1153 | 1170 | CrTpSSR03007 | CrTC32857 | (AG)12  | 1119 | 1142 | 3  | --         | bHLH |
| CakTpSSR03471 | CakTC37313 | (TTC)9  | 16   | 42   | CrTpSSR02690 | CrTC30183 | (TTC)6  | 8    | 25   | 3  | --         | --   |
| CakTpSSR03485 | CakTC37408 | (AAG)13 | 1112 | 1150 | CrTpSSR03383 | CrTC36024 | (AAG)5  | 993  | 1007 | 8  | --         | --   |
| CakTpSSR03489 | CakTC37420 | (TC)12  | 103  | 126  | CrTpSSR01591 | CrTC15997 | (TC)10  | 123  | 142  | 2  | --         | --   |
| CakTpSSR03500 | CakTC37469 | (GA)8   | 10   | 25   | CrTpSSR02720 | CrTC30449 | (GA)6   | 15   | 26   | 2  | --         | bZIP |
| CakTpSSR03505 | CakTC37481 | (TTC)6  | 60   | 77   | CrTpSSR02453 | CrTC27761 | (TTC)5  | 68   | 82   | 1  | --         | --   |
| CakTpSSR03508 | CakTC37490 | (GA)7   | 1179 | 1192 | CrTpSSR02979 | CrTC32649 | (GA)10  | 1076 | 1095 | 3  | --         | --   |
| CakTpSSR03510 | CakTC37496 | (CAA)5  | 209  | 223  | CrTpSSR02272 | CrTC24823 | (CAA)7  | 228  | 248  | 2  | --         | bHLH |
| CakTpSSR03511 | CakTC37498 | (GAT)9  | 555  | 581  | CrTpSSR02596 | CrTC29283 | (GAT)11 | 509  | 541  | 2  | --         | --   |
| CakTpSSR03512 | CakTC37499 | (AG)14  | 1721 | 1748 | CrTpSSR02476 | CrTC28018 | (AG)13  | 825  | 850  | 1  | --         | --   |
| CakTpSSR03519 | CakTC37539 | (AT)9   | 1150 | 1167 | CrTpSSR01881 | CrTC19366 | (AT)15  | 3    | 32   | 6  | --         | --   |
| CakTpSSR03521 | CakTC37545 | (GA)17  | 1609 | 1642 | CrTpSSR01333 | CrTC13180 | (GA)10  | 1605 | 1624 | 7  | --         | --   |
| CakTpSSR03527 | CakTC37578 | (GA)8   | 1214 | 1229 | CrTpSSR03188 | CrTC34391 | (GA)9   | 1121 | 1138 | 1  | --         | --   |
| CakTpSSR03530 | CakTC37590 | (TCC)6  | 795  | 812  | CrTpSSR00755 | CrTC07393 | (TCC)5  | 804  | 818  | 1  | --         | WRKY |
| CakTpSSR03532 | CakTC37598 | (TTG)6  | 1177 | 1194 | CrTpSSR01368 | CrTC13498 | (TTG)7  | 871  | 891  | 1  | --         | --   |
| CakTpSSR03533 | CakTC37605 | (TTC)7  | 67   | 87   | CrTpSSR02685 | CrTC30129 | (TTC)8  | 82   | 105  | 1  | --         | --   |
| CakTpSSR03546 | CakTC37680 | (GAG)9  | 1415 | 1441 | CrTpSSR01079 | CrTC10550 | (GAG)8  | 1471 | 1494 | 1  | --         | --   |
| CakTpSSR03551 | CakTC37708 | (ATA)5  | 237  | 251  | CrTpSSR02653 | CrTC29818 | (ATA)11 | 222  | 254  | 6  | --         | --   |
| CakTpSSR03556 | CakTC37742 | (GA)10  | 169  | 188  | CrTpSSR00414 | CrTC03984 | (GA)25  | 1    | 50   | 15 | Flower bud | --   |
| CakTpSSR03560 | CakTC37765 | (TTC)6  | 42   | 59   | CrTpSSR03366 | CrTC35879 | (TTC)7  | 22   | 42   | 1  | --         | --   |
| CakTpSSR03562 | CakTC37771 | (AAC)5  | 266  | 280  | CrTpSSR03071 | CrTC33518 | (AAC)6  | 257  | 274  | 1  | Shoot      | --   |
| CakTpSSR03568 | CakTC37779 | (GGT)6  | 677  | 694  | CrTpSSR02605 | CrTC29367 | (GGT)5  | 637  | 651  | 1  | --         | --   |
| CakTpSSR03590 | CakTC37894 | (CCT)6  | 910  | 927  | CrTpSSR01379 | CrTC13628 | (CCT)5  | 905  | 919  | 1  | --         | --   |
| CakTpSSR03593 | CakTC37899 | (CT)7   | 90   | 103  | CrTpSSR03194 | CrTC34465 | (CT)9   | 96   | 113  | 2  | --         | --   |
| CakTpSSR03595 | CakTC37925 | (TC)7   | 952  | 965  | CrTpSSR03197 | CrTC34475 | (TC)8   | 936  | 951  | 1  | --         | --   |

|               |            |         |      |      |              |           |         |      |      |    |    |         |
|---------------|------------|---------|------|------|--------------|-----------|---------|------|------|----|----|---------|
| CakTpSSR03599 | CakTC37942 | (AT)9   | 48   | 65   | CrTpSSR02997 | CrTC32801 | (AT)8   | 49   | 64   | 1  | -- | FAR1    |
| CakTpSSR03602 | CakTC37970 | (AC)8   | 1    | 16   | CrTpSSR01438 | CrTC14251 | (AC)7   | 112  | 125  | 1  | -- | --      |
| CakTpSSR03603 | CakTC37970 | (GGA)9  | 944  | 970  | CrTpSSR01439 | CrTC14251 | (GGA)13 | 1055 | 1093 | 4  | -- | --      |
| CakTpSSR03605 | CakTC37980 | (TTA)5  | 956  | 970  | CrTpSSR03375 | CrTC35944 | (TTA)7  | 956  | 976  | 2  | -- | --      |
| CakTpSSR03606 | CakTC37983 | (AG)6   | 170  | 181  | CrTpSSR02534 | CrTC28690 | (AG)7   | 24   | 37   | 1  | -- | SRS     |
| CakTpSSR03609 | CakTC37988 | (CT)11  | 13   | 34   | CrTpSSR03193 | CrTC34447 | (CT)7   | 4    | 17   | 4  | -- | --      |
| CakTpSSR03615 | CakTC38022 | (AT)19  | 1087 | 1124 | CrTpSSR01632 | CrTC16434 | (AT)24  | 1077 | 1124 | 5  | -- | --      |
| CakTpSSR03627 | CakTC38115 | (AGG)5  | 1186 | 1200 | CrTpSSR00674 | CrTC06633 | (AGG)6  | 1192 | 1209 | 1  | -- | --      |
| CakTpSSR03629 | CakTC38119 | (GA)12  | 1053 | 1076 | CrTpSSR01862 | CrTC19103 | (GA)10  | 1074 | 1093 | 2  | -- | --      |
| CakTpSSR03630 | CakTC38121 | (TC)7   | 23   | 36   | CrTpSSR01066 | CrTC10422 | (TC)6   | 46   | 57   | 1  | -- | --      |
| CakTpSSR03633 | CakTC38135 | (TA)9   | 995  | 1012 | CrTpSSR02169 | CrTC23282 | (TA)7   | 1157 | 1170 | 2  | -- | --      |
| CakTpSSR03637 | CakTC38143 | (TTC)12 | 1028 | 1063 | CrTpSSR03155 | CrTC34147 | (TTC)9  | 906  | 932  | 3  | -- | --      |
| CakTpSSR03639 | CakTC38187 | (GA)14  | 1760 | 1787 | CrTpSSR03288 | CrTC35030 | (GA)10  | 1682 | 1701 | 4  | -- | --      |
| CakTpSSR03642 | CakTC38244 | (CTA)6  | 91   | 108  | CrTpSSR01454 | CrTC14393 | (CTA)7  | 97   | 117  | 1  | -- | C2H2    |
| CakTpSSR03650 | CakTC38300 | (CT)18  | 11   | 46   | CrTpSSR00885 | CrTC08573 | (CT)8   | 96   | 111  | 10 | -- | --      |
| CakTpSSR03658 | CakTC38340 | (AG)7   | 64   | 77   | CrTpSSR03047 | CrTC33235 | (AG)8   | 56   | 71   | 1  | -- | TPR     |
| CakTpSSR03679 | CakTC38524 | (TTC)6  | 83   | 100  | CrTpSSR02142 | CrTC22906 | (TTC)5  | 75   | 89   | 1  | -- | --      |
| CakTpSSR03685 | CakTC38545 | (ACA)5  | 197  | 211  | CrTpSSR03403 | CrTC36259 | (ACA)6  | 48   | 65   | 1  | -- | --      |
| CakTpSSR03697 | CakTC38616 | (ATA)5  | 30   | 44   | CrTpSSR02357 | CrTC26339 | (ATA)6  | 21   | 38   | 1  | -- | --      |
| CakTpSSR03705 | CakTC38658 | (TC)7   | 1023 | 1036 | CrTpSSR00378 | CrTC03577 | (TC)8   | 1007 | 1022 | 1  | -- | --      |
| CakTpSSR03709 | CakTC38673 | (CT)9   | 1    | 18   | CrTpSSR00944 | CrTC09205 | (CT)7   | 711  | 724  | 2  | -- | --      |
| CakTpSSR03714 | CakTC38696 | (TTC)8  | 148  | 171  | CrTpSSR03104 | CrTC33843 | (TTC)11 | 119  | 151  | 3  | -- | --      |
| CakTpSSR03721 | CakTC38734 | (GA)15  | 1476 | 1505 | CrTpSSR01049 | CrTC10302 | (GA)11  | 1253 | 1274 | 4  | -- | --      |
| CakTpSSR03726 | CakTC38753 | (AG)11  | 391  | 412  | CrTpSSR02878 | CrTC31687 | (AG)10  | 385  | 404  | 1  | -- | HB      |
| CakTpSSR03729 | CakTC38763 | (GTG)6  | 1150 | 1167 | CrTpSSR02056 | CrTC21718 | (GTG)8  | 1419 | 1442 | 2  | -- | --      |
| CakTpSSR03751 | CakTC38879 | (AG)6   | 3    | 14   | CrTpSSR01589 | CrTC15955 | (AG)7   | 2    | 15   | 1  | -- | --      |
| CakTpSSR03755 | CakTC38904 | (AAT)6  | 271  | 288  | CrTpSSR00225 | CrTC02320 | (AAT)5  | 291  | 305  | 1  | -- | --      |
| CakTpSSR03757 | CakTC38915 | (TC)9   | 1289 | 1306 | CrTpSSR01016 | CrTC09950 | (TC)6   | 1357 | 1368 | 3  | -- | --      |
| CakTpSSR03765 | CakTC38936 | (AT)8   | 1464 | 1479 | CrTpSSR00645 | CrTC06397 | (AT)6   | 1405 | 1416 | 2  | -- | --      |
| CakTpSSR03798 | CakTC39122 | (TTA)7  | 488  | 508  | CrTpSSR01825 | CrTC18537 | (TTA)5  | 460  | 474  | 2  | -- | --      |
| CakTpSSR03802 | CakTC39146 | (GTA)5  | 1243 | 1257 | CrTpSSR01354 | CrTC13337 | (GTA)6  | 1310 | 1327 | 1  | -- | --      |
| CakTpSSR03813 | CakTC39200 | (AG)10  | 1532 | 1551 | CrTpSSR01799 | CrTC18165 | (AG)8   | 1521 | 1536 | 2  | -- | --      |
| CakTpSSR03815 | CakTC39206 | (CT)7   | 115  | 128  | CrTpSSR01727 | CrTC17408 | (CT)6   | 204  | 215  | 1  | -- | AUX/IAA |
| CakTpSSR03821 | CakTC39225 | (TC)11  | 149  | 170  | CrTpSSR01497 | CrTC14855 | (TC)9   | 148  | 165  | 2  | -- | --      |
| CakTpSSR03822 | CakTC39230 | (TC)26  | 1    | 52   | CrTpSSR03162 | CrTC34194 | (TC)18  | 1    | 36   | 8  | -- | --      |
| CakTpSSR03824 | CakTC39237 | (TCT)12 | 174  | 209  | CrTpSSR01197 | CrTC11584 | (TCT)9  | 64   | 90   | 3  | -- | --      |
| CakTpSSR03840 | CakTC39318 | (GA)12  | 1563 | 1586 | CrTpSSR01429 | CrTC14108 | (GA)10  | 1637 | 1656 | 2  | -- | --      |
| CakTpSSR03853 | CakTC39411 | (AG)7   | 15   | 28   | CrTpSSR02593 | CrTC29252 | (AG)8   | 10   | 25   | 1  | -- | --      |
| CakTpSSR03854 | CakTC39421 | (GA)8   | 1365 | 1380 | CrTpSSR03153 | CrTC34135 | (GA)9   | 1367 | 1384 | 1  | -- | --      |
| CakTpSSR03860 | CakTC39446 | (TTG)5  | 1644 | 1658 | CrTpSSR02253 | CrTC24498 | (TTG)6  | 567  | 584  | 1  | -- | --      |

|               |            |         |      |      |              |           |         |      |      |    |            |          |
|---------------|------------|---------|------|------|--------------|-----------|---------|------|------|----|------------|----------|
| CakTpSSR03864 | CakTC39476 | (AG)6   | 1219 | 1230 | CrTpSSR02581 | CrTC29174 | (AG)8   | 1105 | 1120 | 2  | --         | --       |
| CakTpSSR03868 | CakTC39489 | (TTC)6  | 1230 | 1247 | CrTpSSR00745 | CrTC07360 | (TTC)5  | 1234 | 1248 | 1  | --         | --       |
| CakTpSSR03876 | CakTC39534 | (TAT)8  | 188  | 211  | CrTpSSR00423 | CrTC04088 | (TAT)7  | 153  | 173  | 1  | --         | --       |
| CakTpSSR03890 | CakTC39655 | (TTC)7  | 1795 | 1815 | CrTpSSR00642 | CrTC06319 | (TTC)6  | 1814 | 1831 | 1  | --         | --       |
| CakTpSSR03891 | CakTC39656 | (TTC)17 | 45   | 95   | CrTpSSR00545 | CrTC05258 | (TTC)7  | 25   | 45   | 10 | --         | --       |
| CakTpSSR03893 | CakTC39660 | (CCA)7  | 241  | 261  | CrTpSSR00540 | CrTC05136 | (CCA)6  | 987  | 1004 | 1  | --         | --       |
| CakTpSSR03904 | CakTC39738 | (AG)9   | 1254 | 1271 | CrTpSSR00234 | CrTC02361 | (AG)7   | 1276 | 1289 | 2  | --         | --       |
| CakTpSSR03907 | CakTC39752 | (CTT)15 | 123  | 167  | CrTpSSR00677 | CrTC06651 | (CTT)5  | 159  | 173  | 10 | --         | --       |
| CakTpSSR03912 | CakTC39768 | (CCA)8  | 453  | 476  | CrTpSSR02676 | CrTC30045 | (CCA)11 | 455  | 487  | 3  | --         | --       |
| CakTpSSR03923 | CakTC39799 | (GAA)19 | 1300 | 1356 | CrTpSSR02910 | CrTC32063 | (GAA)15 | 1080 | 1124 | 4  | --         | bZIP     |
| CakTpSSR03927 | CakTC39846 | (CTT)6  | 130  | 147  | CrTpSSR02867 | CrTC31577 | (CTT)7  | 117  | 137  | 1  | --         | --       |
| CakTpSSR03929 | CakTC39858 | (TTG)6  | 545  | 562  | CrTpSSR00877 | CrTC08470 | (TTG)5  | 885  | 899  | 1  | --         | --       |
| CakTpSSR03937 | CakTC39897 | (ATT)6  | 688  | 705  | CrTpSSR02509 | CrTC28495 | (ATT)10 | 420  | 449  | 4  | --         | C2C2-Dof |
| CakTpSSR03940 | CakTC39902 | (AGA)5  | 1104 | 1118 | CrTpSSR02807 | CrTC31139 | (AGA)6  | 1067 | 1084 | 1  | --         | --       |
| CakTpSSR03950 | CakTC39992 | (CTT)7  | 124  | 144  | CrTpSSR03307 | CrTC35204 | (CTT)6  | 110  | 127  | 1  | --         | --       |
| CakTpSSR03951 | CakTC40000 | (GA)13  | 1162 | 1187 | CrTpSSR01536 | CrTC15428 | (GA)9   | 1144 | 1161 | 4  | --         | LOB      |
| CakTpSSR03956 | CakTC40031 | (TC)12  | 1    | 24   | CrTpSSR00598 | CrTC05863 | (TC)9   | 359  | 376  | 3  | --         | --       |
| CakTpSSR03975 | CakTC40177 | (GAA)5  | 605  | 619  | CrTpSSR02632 | CrTC29663 | (GAA)6  | 585  | 602  | 1  | --         | --       |
| CakTpSSR04018 | CakTC40380 | (GTT)7  | 671  | 691  | CrTpSSR00678 | CrTC06666 | (GTT)6  | 673  | 690  | 1  | Flower bud | --       |
| CakTpSSR04023 | CakTC40408 | (TTC)5  | 96   | 110  | CrTpSSR03416 | CrTC36377 | (TTC)6  | 103  | 120  | 1  | --         | --       |
| CakTpSSR04031 | CakTC40450 | (TTC)6  | 1973 | 1990 | CrTpSSR02836 | CrTC31360 | (TTC)5  | 308  | 322  | 1  | --         | --       |
| CakTpSSR04040 | CakTC40534 | (TCT)7  | 132  | 152  | CrTpSSR02932 | CrTC32270 | (TCT)6  | 98   | 115  | 1  | --         | --       |
| CakTpSSR04045 | CakTC40557 | (TC)12  | 641  | 664  | CrTpSSR03332 | CrTC35424 | (TC)7   | 646  | 659  | 5  | --         | --       |
| CakTpSSR04047 | CakTC40562 | (TAT)6  | 171  | 188  | CrTpSSR03338 | CrTC35519 | (TAT)5  | 132  | 146  | 1  | --         | --       |
| CakTpSSR04052 | CakTC40587 | (ATTC)6 | 86   | 109  | CrTpSSR03333 | CrTC35446 | (ATTC)5 | 50   | 69   | 1  | --         | --       |
| CakTpSSR04058 | CakTC40637 | (GA)20  | 2026 | 2065 | CrTpSSR03204 | CrTC34515 | (GA)14  | 434  | 461  | 6  | --         | WRKY     |
| CakTpSSR04062 | CakTC40666 | (TGG)6  | 776  | 793  | CrTpSSR03014 | CrTC32894 | (TGG)5  | 399  | 413  | 1  | --         | OFD      |
| CakTpSSR04072 | CakTC40695 | (TA)9   | 56   | 73   | CrTpSSR02553 | CrTC28869 | (TA)6   | 2022 | 2033 | 3  | --         | --       |
| CakTpSSR04075 | CakTC40704 | (ATT)7  | 194  | 214  | CrTpSSR03018 | CrTC32941 | (ATT)9  | 167  | 193  | 2  | --         | --       |
| CakTpSSR04076 | CakTC40711 | (CCA)5  | 950  | 964  | CrTpSSR02356 | CrTC26301 | (CCA)6  | 908  | 925  | 1  | --         | --       |
| CakTpSSR04080 | CakTC40771 | (CT)6   | 1    | 12   | CrTpSSR01455 | CrTC14396 | (CT)9   | 69   | 86   | 3  | --         | --       |
| CakTpSSR04090 | CakTC40857 | (TC)6   | 49   | 60   | CrTpSSR01207 | CrTC11698 | (TC)11  | 45   | 66   | 5  | --         | --       |
| CakTpSSR04098 | CakTC40890 | (CAA)5  | 1626 | 1640 | CrTpSSR01097 | CrTC10658 | (CAA)7  | 2106 | 2126 | 2  | --         | TPR      |
| CakTpSSR04119 | CakTC41015 | (AG)13  | 576  | 601  | CrTpSSR02883 | CrTC31749 | (AG)15  | 566  | 595  | 2  | --         | --       |
| CakTpSSR04134 | CakTC41162 | (TTA)7  | 656  | 676  | CrTpSSR02306 | CrTC25563 | (TTA)5  | 650  | 664  | 2  | --         | --       |
| CakTpSSR04135 | CakTC41164 | (AG)26  | 650  | 701  | CrTpSSR00243 | CrTC02392 | (AG)10  | 638  | 657  | 16 | --         | --       |
| CakTpSSR04136 | CakTC41169 | (AAG)8  | 2065 | 2088 | CrTpSSR01960 | CrTC20528 | (AAG)10 | 1996 | 2025 | 2  | --         | --       |
| CakTpSSR04141 | CakTC41199 | (TC)12  | 178  | 201  | CrTpSSR03216 | CrTC34598 | (TC)14  | 19   | 46   | 2  | --         | --       |
| CakTpSSR04171 | CakTC41304 | (TAG)7  | 899  | 919  | CrTpSSR01307 | CrTC12864 | (TAG)6  | 177  | 194  | 1  | --         | GRAS     |
| CakTpSSR04172 | CakTC41313 | (CAT)5  | 330  | 344  | CrTpSSR00327 | CrTC03053 | (CAT)7  | 298  | 318  | 2  | --         | --       |

|               |            |         |      |      |              |           |         |      |      |    |            |           |
|---------------|------------|---------|------|------|--------------|-----------|---------|------|------|----|------------|-----------|
| CakTpSSR04189 | CakTC41441 | (AG)18  | 2    | 37   | CrTpSSR03221 | CrTC34629 | (AG)7   | 1    | 14   | 11 | --         | --        |
| CakTpSSR04191 | CakTC41446 | (GA)6   | 703  | 714  | CrTpSSR03320 | CrTC35271 | (GA)7   | 686  | 699  | 1  | --         | --        |
| CakTpSSR04205 | CakTC41518 | (TCT)9  | 306  | 332  | CrTpSSR00833 | CrTC08057 | (TCT)10 | 297  | 326  | 1  | --         | --        |
| CakTpSSR04210 | CakTC41565 | (GAT)6  | 676  | 693  | CrTpSSR03411 | CrTC36320 | (GAT)5  | 673  | 687  | 1  | --         | --        |
| CakTpSSR04211 | CakTC41577 | (CAA)5  | 159  | 173  | CrTpSSR02491 | CrTC28238 | (CAA)7  | 137  | 157  | 2  | --         | SNF2      |
| CakTpSSR04214 | CakTC41608 | (GAA)5  | 600  | 614  | CrTpSSR01813 | CrTC18384 | (GAA)7  | 404  | 424  | 2  | --         | --        |
| CakTpSSR04217 | CakTC41626 | (ACA)8  | 31   | 54   | CrTpSSR02088 | CrTC22292 | (ACA)6  | 118  | 135  | 2  | --         | --        |
| CakTpSSR04220 | CakTC41634 | (AC)11  | 115  | 136  | CrTpSSR03329 | CrTC35362 | (AC)9   | 80   | 97   | 2  | --         | --        |
| CakTpSSR04236 | CakTC41773 | (CT)8   | 11   | 26   | CrTpSSR01943 | CrTC20367 | (CT)13  | 26   | 51   | 5  | --         | bHLH      |
| CakTpSSR04238 | CakTC41785 | (AG)6   | 27   | 38   | CrTpSSR02619 | CrTC29531 | (AG)8   | 20   | 35   | 2  | --         | --        |
| CakTpSSR04242 | CakTC41797 | (TC)10  | 2294 | 2313 | CrTpSSR01645 | CrTC16549 | (TC)12  | 2275 | 2298 | 2  | --         | --        |
| CakTpSSR04243 | CakTC41808 | (AG)12  | 46   | 69   | CrTpSSR03219 | CrTC34615 | (AG)13  | 43   | 68   | 1  | --         | GRAS      |
| CakTpSSR04255 | CakTC41904 | (TTC)8  | 42   | 65   | CrTpSSR02808 | CrTC31140 | (TTC)9  | 48   | 74   | 1  | --         | --        |
| CakTpSSR04262 | CakTC41929 | (AAC)5  | 148  | 162  | CrTpSSR00794 | CrTC07760 | (AAC)7  | 276  | 296  | 2  | --         | --        |
| CakTpSSR04273 | CakTC41998 | (AG)6   | 187  | 198  | CrTpSSR00245 | CrTC02403 | (AG)8   | 187  | 202  | 2  | --         | MADS      |
| CakTpSSR04276 | CakTC42021 | (TA)7   | 275  | 288  | CrTpSSR02820 | CrTC31223 | (TA)8   | 214  | 229  | 1  | --         | --        |
| CakTpSSR04286 | CakTC42090 | (TTG)5  | 846  | 860  | CrTpSSR00954 | CrTC09292 | (TTG)6  | 1307 | 1324 | 1  | --         | --        |
| CakTpSSR04288 | CakTC42101 | (GAA)6  | 101  | 118  | CrTpSSR02684 | CrTC30128 | (GAA)8  | 44   | 67   | 2  | --         | --        |
| CakTpSSR04290 | CakTC42107 | (TTA)8  | 893  | 916  | CrTpSSR03425 | CrTC36486 | (TTA)7  | 404  | 424  | 1  | --         | --        |
| CakTpSSR04292 | CakTC42118 | (AG)13  | 966  | 991  | CrTpSSR01415 | CrTC13973 | (AG)26  | 914  | 965  | 13 | --         | --        |
| CakTpSSR04294 | CakTC42129 | (AT)9   | 24   | 41   | CrTpSSR01693 | CrTC17131 | (AT)12  | 12   | 35   | 3  | --         | --        |
| CakTpSSR04298 | CakTC42155 | (TC)10  | 121  | 140  | CrTpSSR03419 | CrTC36384 | (TC)9   | 179  | 196  | 1  | --         | --        |
| CakTpSSR04300 | CakTC42170 | (CT)10  | 1808 | 1827 | CrTpSSR01213 | CrTC11768 | (CT)11  | 1775 | 1796 | 1  | --         | --        |
| CakTpSSR04329 | CakTC42321 | (AAG)7  | 846  | 866  | CrTpSSR03352 | CrTC35721 | (AAG)5  | 801  | 815  | 2  | Root       | --        |
| CakTpSSR04331 | CakTC42322 | (TGG)7  | 804  | 824  | CrTpSSR02471 | CrTC27991 | (TGG)6  | 73   | 90   | 1  | --         | --        |
| CakTpSSR04335 | CakTC42346 | (TAA)7  | 455  | 475  | CrTpSSR00983 | CrTC09647 | (TAA)8  | 449  | 472  | 1  | --         | bHLH      |
| CakTpSSR04339 | CakTC42362 | (CT)8   | 1682 | 1697 | CrTpSSR02512 | CrTC28518 | (CT)10  | 1620 | 1639 | 2  | --         | --        |
| CakTpSSR04340 | CakTC42363 | (AG)10  | 80   | 99   | CrTpSSR03272 | CrTC34919 | (AG)8   | 44   | 59   | 2  | --         | bZIP      |
| CakTpSSR04346 | CakTC42424 | (GAT)5  | 743  | 757  | CrTpSSR02482 | CrTC28117 | (GAT)6  | 593  | 610  | 1  | --         | --        |
| CakTpSSR04350 | CakTC42461 | (CAA)6  | 437  | 454  | CrTpSSR01850 | CrTC18923 | (CAA)5  | 443  | 457  | 1  | --         | --        |
| CakTpSSR04351 | CakTC42462 | (AAAC)6 | 76   | 99   | CrTpSSR03196 | CrTC34469 | (AAAC)7 | 42   | 69   | 1  | --         | --        |
| CakTpSSR04359 | CakTC42484 | (TC)12  | 4    | 27   | CrTpSSR02155 | CrTC23117 | (TC)8   | 18   | 33   | 4  | --         | --        |
| CakTpSSR04368 | CakTC42521 | (TC)6   | 33   | 44   | CrTpSSR00812 | CrTC07928 | (TC)7   | 20   | 33   | 1  | --         | MYB       |
| CakTpSSR04383 | CakTC42613 | (CAG)7  | 127  | 147  | CrTpSSR02658 | CrTC29854 | (CAG)6  | 115  | 132  | 1  | --         | --        |
| CakTpSSR04389 | CakTC42648 | (AG)6   | 113  | 124  | CrTpSSR03267 | CrTC34891 | (AG)8   | 88   | 103  | 2  | --         | --        |
| CakTpSSR04391 | CakTC42656 | (TGA)6  | 794  | 811  | CrTpSSR02674 | CrTC30034 | (TGA)7  | 173  | 193  | 1  | --         | --        |
| CakTpSSR04398 | CakTC42680 | (TAT)9  | 347  | 373  | CrTpSSR01633 | CrTC16471 | (TAT)6  | 98   | 115  | 3  | Flower bud | AP2-EREBP |
| CakTpSSR04404 | CakTC42701 | (TCT)7  | 856  | 876  | CrTpSSR03364 | CrTC35844 | (TCT)8  | 878  | 901  | 1  | --         | --        |
| CakTpSSR04405 | CakTC42710 | (CT)11  | 6    | 27   | CrTpSSR00001 | CrTC00010 | (CT)13  | 138  | 163  | 2  | --         | --        |
| CakTpSSR04406 | CakTC42718 | (GAT)6  | 197  | 214  | CrTpSSR03415 | CrTC36365 | (GAT)7  | 156  | 176  | 1  | --         | --        |

|               |            |         |      |      |              |           |         |      |      |   |             |      |
|---------------|------------|---------|------|------|--------------|-----------|---------|------|------|---|-------------|------|
| CakTpSSR04407 | CakTC42722 | (AG)6   | 14   | 25   | CrTpSSR03063 | CrTC33426 | (AG)8   | 1    | 16   | 2 | --          | --   |
| CakTpSSR04412 | CakTC42754 | (TC)7   | 876  | 889  | CrTpSSR03355 | CrTC35742 | (TC)6   | 761  | 772  | 1 | --          | --   |
| CakTpSSR04416 | CakTC42766 | (AG)8   | 798  | 813  | CrTpSSR01697 | CrTC17183 | (AG)9   | 658  | 675  | 1 | --          | --   |
| CakTpSSR04432 | CakTC42853 | (TTTC)7 | 1913 | 1940 | CrTpSSR00636 | CrTC06210 | (TTTC)5 | 1994 | 2013 | 2 | --          | --   |
| CakTpSSR04435 | CakTC42865 | (ATG)6  | 637  | 654  | CrTpSSR03389 | CrTC36085 | (ATG)5  | 615  | 629  | 1 | --          | --   |
| CakTpSSR04441 | CakTC42922 | (AAC)5  | 159  | 173  | CrTpSSR01004 | CrTC09816 | (AAC)6  | 141  | 158  | 1 | Flower bud  | --   |
| CakTpSSR04443 | CakTC42941 | (TAA)7  | 187  | 207  | CrTpSSR03016 | CrTC32909 | (TAA)12 | 199  | 234  | 5 | --          | --   |
| CakTpSSR04445 | CakTC42950 | (TAA)5  | 1596 | 1610 | CrTpSSR00242 | CrTC02386 | (TAA)8  | 1361 | 1384 | 3 | --          | C2H2 |
| CakTpSSR04449 | CakTC42985 | (TGA)11 | 1878 | 1910 | CrTpSSR01811 | CrTC18369 | (TGA)5  | 1877 | 1891 | 6 | --          | --   |
| CakTpSSR04453 | CakTC42999 | (ATG)7  | 1716 | 1736 | CrTpSSR02257 | CrTC24552 | (ATG)6  | 1910 | 1927 | 1 | --          | TUB  |
| CakTpSSR04454 | CakTC43001 | (AG)10  | 833  | 852  | CrTpSSR03414 | CrTC36356 | (AG)12  | 813  | 836  | 2 | --          | --   |
| CakTpSSR04464 | CakTC43053 | (TC)8   | 1908 | 1923 | CrTpSSR02627 | CrTC29628 | (TC)7   | 1906 | 1919 | 1 | --          | --   |
| CakTpSSR04470 | CakTC43078 | (TGG)8  | 720  | 743  | CrTpSSR00112 | CrTC01308 | (TGG)6  | 902  | 919  | 2 | --          | --   |
| CakTpSSR04478 | CakTC43112 | (CAA)7  | 566  | 586  | CrTpSSR01734 | CrTC17518 | (CAA)8  | 509  | 532  | 1 | Mature Leaf | bHLH |
| CakTpSSR04488 | CakTC43146 | (TCT)6  | 128  | 145  | CrTpSSR03448 | CrTC36959 | (TCT)5  | 85   | 99   | 1 | --          | --   |
| CakTpSSR04491 | CakTC43179 | (AG)10  | 1000 | 1019 | CrTpSSR01969 | CrTC20608 | (AG)11  | 894  | 915  | 1 | --          | --   |
| CakTpSSR04502 | CakTC43250 | (TC)15  | 799  | 828  | CrTpSSR03417 | CrTC36379 | (TC)11  | 787  | 808  | 4 | --          | --   |
| CakTpSSR04510 | CakTC43305 | (AG)7   | 872  | 885  | CrTpSSR02849 | CrTC31446 | (AG)9   | 778  | 795  | 2 | --          | --   |
