# Supplementary material
Source: publisher figshare collection journal article supplement (https://plos.figshare.com/articles/dataset/_/115291)
Supplement: Supplementary file 1 [file 1 › Table_S10.pdf]

**Table S10.** List of SNPs identified between kabuli and desi chickpea.

| Kabuli transcript ID | SNP_ID                    | SNP position (kabuli) | Kabuli allele | Desi allele | Read depth kabuli | Read depth desi | Tissue specificity | TF family |
|----------------------|---------------------------|-----------------------|---------------|-------------|-------------------|-----------------|--------------------|-----------|
| CakTC28377           | Ca(ICC2/ICC4958)SNP_00001 | 272                   | C             | T           | 3                 | 3               | --                 | --        |
|                      | Ca(ICC2/ICC4958)SNP_00002 | 370                   | C             | T           | 3                 | 5               | --                 | --        |
|                      | Ca(ICC2/ICC4958)SNP_00003 | 948                   | G             | A           | 3                 | 3               | --                 | --        |
|                      | Ca(ICC2/ICC4958)SNP_00004 | 971                   | C             | A           | 3                 | 5               | --                 | --        |
|                      | Ca(ICC2/ICC4958)SNP_00005 | 973                   | A             | T           | 3                 | 5               | --                 | --        |
|                      | Ca(ICC2/ICC4958)SNP_00006 | 1223                  | C             | A           | 3                 | 3               | --                 | --        |
|                      | Ca(ICC2/ICC4958)SNP_00007 | 1289                  | G             | A           | 3                 | 3               | --                 | --        |
| CakTC34874           | Ca(ICC2/ICC4958)SNP_00008 | 611                   | C             | G           | 8                 | 4               | --                 | --        |
| CakTC38944           | Ca(ICC2/ICC4958)SNP_00009 | 715                   | T             | G           | 7                 | 5               | --                 | --        |
|                      | Ca(ICC2/ICC4958)SNP_00010 | 754                   | T             | G           | 10                | 6               | --                 | --        |
|                      | Ca(ICC2/ICC4958)SNP_00011 | 1117                  | T             | A           | 19                | 12              | --                 | --        |
|                      | Ca(ICC2/ICC4958)SNP_00012 | 1144                  | C             | T           | 18                | 11              | --                 | --        |
|                      | Ca(ICC2/ICC4958)SNP_00013 | 1264                  | G             | A           | 15                | 13              | --                 | --        |
|                      | Ca(ICC2/ICC4958)SNP_00014 | 1466                  | A             | G           | 9                 | 4               | --                 | --        |
|                      | Ca(ICC2/ICC4958)SNP_00015 | 1489                  | A             | G           | 9                 | 4               | --                 | --        |
|                      | Ca(ICC2/ICC4958)SNP_00016 | 1542                  | G             | T           | 5                 | 4               | --                 | --        |
| CakTC09809           | Ca(ICC2/ICC4958)SNP_00017 | 1445                  | T             | G           | 3                 | 3               | --                 | --        |
| CakTC13136           | Ca(ICC2/ICC4958)SNP_00018 | 291                   | T             | C           | 4                 | 4               | --                 | --        |
|                      | Ca(ICC2/ICC4958)SNP_00019 | 299                   | G             | C           | 4                 | 4               | --                 | --        |
|                      | Ca(ICC2/ICC4958)SNP_00020 | 334                   | G             | A           | 5                 | 7               | --                 | --        |
| CakTC25292           | Ca(ICC2/ICC4958)SNP_00021 | 610                   | C             | T           | 11                | 10              | --                 | --        |
|                      | Ca(ICC2/ICC4958)SNP_00022 | 1226                  | G             | T           | 12                | 10              | --                 | --        |
| CakTC34422           | Ca(ICC2/ICC4958)SNP_00023 | 55                    | C             | A           | 7                 | 5               | --                 | GRAS      |
|                      | Ca(ICC2/ICC4958)SNP_00024 | 622                   | T             | G           | 21                | 10              | --                 | GRAS      |
| CakTC40414           | Ca(ICC2/ICC4958)SNP_00025 | 1913                  | A             | T           | 6                 | 3               | Flower bud         | --        |
| CakTC31444           | Ca(ICC2/ICC4958)SNP_00026 | 185                   | C             | T           | 5                 | 3               | --                 | --        |
|                      | Ca(ICC2/ICC4958)SNP_00027 | 272                   | C             | T           | 7                 | 9               | --                 | --        |
|                      | Ca(ICC2/ICC4958)SNP_00028 | 302                   | C             | A           | 8                 | 11              | --                 | --        |
|                      | Ca(ICC2/ICC4958)SNP_00029 | 395                   | C             | T           | 8                 | 10              | --                 | --        |
|                      | Ca(ICC2/ICC4958)SNP_00030 | 398                   | C             | T           | 5                 | 9               | --                 | --        |
|                      | Ca(ICC2/ICC4958)SNP_00031 | 482                   | T             | C           | 5                 | 8               | --                 | --        |
|                      | Ca(ICC2/ICC4958)SNP_00032 | 515                   | T             | C           | 5                 | 5               | --                 | --        |
|                      | Ca(ICC2/ICC4958)SNP_00033 | 548                   | T             | C           | 4                 | 5               | --                 | --        |
|                      | Ca(ICC2/ICC4958)SNP_00034 | 578                   | C             | A           | 5                 | 5               | --                 | --        |
|                      | Ca(ICC2/ICC4958)SNP_00035 | 728                   | T             | C           | 6                 | 4               | --                 | --        |
|                      | Ca(ICC2/ICC4958)SNP_00036 | 801                   | A             | G           | 6                 | 4               | --                 | --        |
|                      | Ca(ICC2/ICC4958)SNP_00037 | 803                   | T             | C           | 6                 | 5               | --                 | --        |
|                      | Ca(ICC2/ICC4958)SNP_00038 | 833                   | C             | T           | 6                 | 5               | --                 | --        |
|                      | Ca(ICC2/ICC4958)SNP_00039 | 1359                  | G             | A           | 8                 | 10              | --                 | --        |
|                      | Ca(ICC2/ICC4958)SNP_00040 | 1400                  | C             | T           | 8                 | 10              | --                 | --        |
|                      | Ca(ICC2/ICC4958)SNP_00041 | 1437                  | C             | A           | 9                 | 11              | --                 | --        |
|                      | Ca(ICC2/ICC4958)SNP_00042 | 1490                  | A             | T           | 7                 | 11              | --                 | --        |
|                      | Ca(ICC2/ICC4958)SNP_00043 | 1607                  | G             | A           | 8                 | 8               | --                 | --        |
| CakTC10834           | Ca(ICC2/ICC4958)SNP_00044 | 578                   | C             | A           | 11                | 9               | --                 | AUX/IAA   |
| CakTC12266           | Ca(ICC2/ICC4958)SNP_00045 | 237                   | G             | A           | 7                 | 9               | --                 | --        |
| CakTC13722           | Ca(ICC2/ICC4958)SNP_00046 | 1752                  | G             | A           | 35                | 9               | --                 | --        |
| CakTC11127           | Ca(ICC2/ICC4958)SNP_00047 | 258                   | C             | G           | 13                | 13              | --                 | CCHC      |
|                      | Ca(ICC2/ICC4958)SNP_00048 | 269                   | G             | A           | 11                | 13              | --                 | CCHC      |
|                      | Ca(ICC2/ICC4958)SNP_00049 | 318                   | T             | C           | 16                | 12              | --                 | CCHC      |
|                      | Ca(ICC2/ICC4958)SNP_00050 | 1254                  | G             | A           | 7                 | 13              | --                 | CCHC      |
|                      | Ca(ICC2/ICC4958)SNP_00051 | 1606                  | A             | G           | 10                | 13              | --                 | CCHC      |
|                      | Ca(ICC2/ICC4958)SNP_00052 | 2091                  | T             | G           | 9                 | 12              | --                 | CCHC      |
|                      | Ca(ICC2/ICC4958)SNP_00053 | 2280                  | A             | G           | 8                 | 11              | --                 | CCHC      |
|                      | Ca(ICC2/ICC4958)SNP_00054 | 2331                  | G             | A           | 11                | 11              | --                 | CCHC      |
|                      | Ca(ICC2/ICC4958)SNP_00055 | 2349                  | C             | T           | 14                | 11              | --                 | CCHC      |
|                      | Ca(ICC2/ICC4958)SNP_00056 | 3065                  | T             | C           | 10                | 32              | --                 | CCHC      |
|                      | Ca(ICC2/ICC4958)SNP_00057 | 3111                  | A             | C           | 14                | 35              | --                 | CCHC      |
| CakTC14353           | Ca(ICC2/ICC4958)SNP_00058 | 189                   | G             | A           | 3                 | 5               | Young pod          | --        |
| CakTC39323           | Ca(ICC2/ICC4958)SNP_00059 | 1319                  | A             | G           | 3                 | 8               | --                 | --        |
| CakTC30832           | Ca(ICC2/ICC4958)SNP_00060 | 1610                  | G             | T           | 7                 | 4               | --                 | ABI3VP1   |
| CakTC34113           | Ca(ICC2/ICC4958)SNP_00061 | 569                   | G             | A           | 28                | 10              | --                 | bZIP      |
|                      | Ca(ICC2/ICC4958)SNP_00062 | 867                   | A             | G           | 30                | 13              | --                 | bZIP      |
|                      | Ca(ICC2/ICC4958)SNP_00063 | 1127                  | T             | C           | 27                | 13              | --                 | bZIP      |
|                      | Ca(ICC2/ICC4958)SNP_00064 | 1352                  | C             | T           | 10                | 14              | --                 | bZIP      |
| CakTC26979           | Ca(ICC2/ICC4958)SNP_00065 | 1118                  | G             | C           | 13                | 11              | --                 | bZIP      |
|                      | Ca(ICC2/ICC4958)SNP_00066 | 1127                  | A             | G           | 12                | 11              | --                 | bZIP      |
|                      | Ca(ICC2/ICC4958)SNP_00067 | 1133                  | A             | G           | 13                | 11              | --                 | bZIP      |
| CakTC32079           | Ca(ICC2/ICC4958)SNP_00068 | 788                   | T             | C           | 3                 | 3               | --                 | --        |

|            |                           |      |   |   |    |    |       |          |
|------------|---------------------------|------|---|---|----|----|-------|----------|
| CakTC23460 | Ca(ICC2/ICC4958)SNP_00069 | 223  | G | A | 6  | 3  | --    | --       |
| CakTC27374 | Ca(ICC2/ICC4958)SNP_00070 | 748  | G | T | 6  | 7  | --    | --       |
|            | Ca(ICC2/ICC4958)SNP_00071 | 1301 | C | T | 4  | 8  | --    | --       |
| CakTC09698 | Ca(ICC2/ICC4958)SNP_00072 | 2963 | A | T | 3  | 10 | --    | --       |
| CakTC23234 | Ca(ICC2/ICC4958)SNP_00073 | 173  | A | G | 4  | 5  | --    | --       |
| CakTC32696 | Ca(ICC2/ICC4958)SNP_00074 | 1621 | G | A | 5  | 15 | --    | CCHC     |
| CakTC31023 | Ca(ICC2/ICC4958)SNP_00075 | 1748 | C | T | 4  | 4  | --    | --       |
|            | Ca(ICC2/ICC4958)SNP_00076 | 1876 | G | C | 4  | 6  | --    | --       |
|            | Ca(ICC2/ICC4958)SNP_00077 | 1879 | A | G | 4  | 6  | --    | --       |
|            | Ca(ICC2/ICC4958)SNP_00078 | 2092 | C | T | 3  | 3  | --    | --       |
| CakTC41609 | Ca(ICC2/ICC4958)SNP_00079 | 625  | A | G | 5  | 7  | --    | --       |
| CakTC23206 | Ca(ICC2/ICC4958)SNP_00080 | 785  | G | A | 14 | 3  | --    | --       |
|            | Ca(ICC2/ICC4958)SNP_00081 | 914  | C | A | 9  | 3  | --    | --       |
|            | Ca(ICC2/ICC4958)SNP_00082 | 1002 | T | G | 9  | 3  | --    | --       |
| CakTC37297 | Ca(ICC2/ICC4958)SNP_00083 | 182  | T | C | 5  | 11 | --    | --       |
|            | Ca(ICC2/ICC4958)SNP_00084 | 313  | G | A | 8  | 14 | --    | --       |
| CakTC28758 | Ca(ICC2/ICC4958)SNP_00085 | 88   | G | A | 13 | 10 | --    | --       |
|            | Ca(ICC2/ICC4958)SNP_00086 | 171  | T | A | 19 | 18 | --    | --       |
|            | Ca(ICC2/ICC4958)SNP_00087 | 432  | A | T | 61 | 54 | --    | --       |
|            | Ca(ICC2/ICC4958)SNP_00088 | 623  | G | A | 79 | 57 | --    | --       |
|            | Ca(ICC2/ICC4958)SNP_00089 | 1122 | A | G | 39 | 26 | --    | --       |
| CakTC11944 | Ca(ICC2/ICC4958)SNP_00090 | 75   | G | A | 4  | 7  | --    | --       |
|            | Ca(ICC2/ICC4958)SNP_00091 | 390  | C | A | 6  | 12 | --    | --       |
|            | Ca(ICC2/ICC4958)SNP_00092 | 654  | A | G | 3  | 9  | --    | --       |
|            | Ca(ICC2/ICC4958)SNP_00093 | 816  | C | G | 4  | 4  | --    | --       |
|            | Ca(ICC2/ICC4958)SNP_00094 | 856  | T | C | 4  | 4  | --    | --       |
|            | Ca(ICC2/ICC4958)SNP_00095 | 950  | A | T | 4  | 3  | --    | --       |
| CakTC41163 | Ca(ICC2/ICC4958)SNP_00096 | 549  | T | G | 5  | 3  | --    | --       |
| CakTC42187 | Ca(ICC2/ICC4958)SNP_00097 | 546  | C | G | 38 | 43 | --    | --       |
|            | Ca(ICC2/ICC4958)SNP_00098 | 702  | C | T | 26 | 26 | --    | --       |
| CakTC16891 | Ca(ICC2/ICC4958)SNP_00099 | 1154 | A | G | 3  | 3  | --    | --       |
|            | Ca(ICC2/ICC4958)SNP_00100 | 1161 | A | G | 3  | 4  | --    | --       |
| CakTC22734 | Ca(ICC2/ICC4958)SNP_00101 | 1005 | G | A | 22 | 23 | --    | --       |
| CakTC27562 | Ca(ICC2/ICC4958)SNP_00102 | 1005 | A | G | 28 | 12 | --    | bZIP     |
| CakTC12298 | Ca(ICC2/ICC4958)SNP_00103 | 33   | G | A | 3  | 3  | --    | --       |
| CakTC41053 | Ca(ICC2/ICC4958)SNP_00104 | 2374 | G | T | 5  | 13 | Shoot | --       |
|            | Ca(ICC2/ICC4958)SNP_00105 | 2377 | A | G | 5  | 14 | Shoot | --       |
| CakTC30491 | Ca(ICC2/ICC4958)SNP_00106 | 914  | C | T | 14 | 7  | --    | --       |
| CakTC38380 | Ca(ICC2/ICC4958)SNP_00107 | 1009 | C | T | 4  | 14 | --    | C2C2-Dof |
| CakTC39677 | Ca(ICC2/ICC4958)SNP_00108 | 782  | C | G | 9  | 9  | --    | --       |
|            | Ca(ICC2/ICC4958)SNP_00109 | 956  | G | T | 7  | 13 | --    | --       |
|            | Ca(ICC2/ICC4958)SNP_00110 | 1107 | A | G | 5  | 6  | --    | --       |
| CakTC40798 | Ca(ICC2/ICC4958)SNP_00111 | 1030 | T | C | 6  | 4  | --    | --       |
| CakTC14765 | Ca(ICC2/ICC4958)SNP_00112 | 666  | G | T | 4  | 3  | --    | --       |
|            | Ca(ICC2/ICC4958)SNP_00113 | 667  | C | T | 4  | 3  | --    | --       |
|            | Ca(ICC2/ICC4958)SNP_00114 | 818  | A | G | 3  | 3  | --    | --       |
| CakTC23091 | Ca(ICC2/ICC4958)SNP_00115 | 955  | T | G | 3  | 4  | --    | --       |
|            | Ca(ICC2/ICC4958)SNP_00116 | 1117 | T | G | 3  | 3  | --    | --       |
| CakTC26525 | Ca(ICC2/ICC4958)SNP_00117 | 234  | G | C | 51 | 29 | --    | --       |
|            | Ca(ICC2/ICC4958)SNP_00118 | 541  | T | A | 66 | 52 | --    | --       |
|            | Ca(ICC2/ICC4958)SNP_00119 | 1267 | T | C | 35 | 25 | --    | --       |
|            | Ca(ICC2/ICC4958)SNP_00120 | 1497 | A | T | 4  | 10 | --    | --       |
| CakTC40385 | Ca(ICC2/ICC4958)SNP_00121 | 1480 | A | G | 15 | 5  | --    | --       |
| CakTC22389 | Ca(ICC2/ICC4958)SNP_00122 | 240  | C | A | 3  | 3  | --    | --       |
|            | Ca(ICC2/ICC4958)SNP_00123 | 448  | G | T | 4  | 4  | --    | --       |
|            | Ca(ICC2/ICC4958)SNP_00124 | 497  | C | A | 4  | 5  | --    | --       |
|            | Ca(ICC2/ICC4958)SNP_00125 | 559  | C | T | 9  | 6  | --    | --       |
|            | Ca(ICC2/ICC4958)SNP_00126 | 681  | A | G | 14 | 7  | --    | --       |
|            | Ca(ICC2/ICC4958)SNP_00127 | 785  | A | T | 14 | 5  | --    | --       |
|            | Ca(ICC2/ICC4958)SNP_00128 | 914  | A | T | 26 | 13 | --    | --       |
|            | Ca(ICC2/ICC4958)SNP_00129 | 1193 | C | T | 60 | 16 | --    | --       |
|            | Ca(ICC2/ICC4958)SNP_00130 | 1292 | T | C | 58 | 17 | --    | --       |
|            | Ca(ICC2/ICC4958)SNP_00131 | 1341 | T | C | 69 | 25 | --    | --       |
|            | Ca(ICC2/ICC4958)SNP_00132 | 1355 | C | T | 70 | 24 | --    | --       |
|            | Ca(ICC2/ICC4958)SNP_00133 | 1358 | T | C | 69 | 23 | --    | --       |
|            | Ca(ICC2/ICC4958)SNP_00134 | 1373 | G | T | 67 | 23 | --    | --       |
|            | Ca(ICC2/ICC4958)SNP_00135 | 1454 | C | T | 62 | 25 | --    | --       |
|            | Ca(ICC2/ICC4958)SNP_00136 | 1466 | T | C | 49 | 24 | --    | --       |
|            | Ca(ICC2/ICC4958)SNP_00137 | 1493 | T | G | 48 | 24 | --    | --       |
|            | Ca(ICC2/ICC4958)SNP_00138 | 1673 | G | T | 51 | 16 | --    | --       |
|            | Ca(ICC2/ICC4958)SNP_00139 | 1760 | G | A | 51 | 18 | --    | --       |
|            | Ca(ICC2/ICC4958)SNP_00140 | 1778 | C | T | 51 | 23 | --    | --       |
|            | Ca(ICC2/ICC4958)SNP_00141 | 1995 | A | G | 19 | 15 | --    | --       |
| CakTC40015 | Ca(ICC2/ICC4958)SNP_00142 | 312  | T | C | 8  | 15 | --    | --       |

|            |                           |      |   |   |     |     |           |       |
|------------|---------------------------|------|---|---|-----|-----|-----------|-------|
| CakTC25051 | Ca(ICC2/ICC4958)SNP_00143 | 152  | T | G | 6   | 7   | --        | --    |
| CakTC17917 | Ca(ICC2/ICC4958)SNP_00144 | 1199 | A | T | 6   | 3   | --        | mTERF |
|            | Ca(ICC2/ICC4958)SNP_00145 | 1222 | G | A | 4   | 4   | --        | mTERF |
| CakTC10294 | Ca(ICC2/ICC4958)SNP_00146 | 416  | T | C | 3   | 3   | --        | --    |
| CakTC35898 | Ca(ICC2/ICC4958)SNP_00147 | 3702 | C | T | 13  | 18  | --        | --    |
| CakTC36730 | Ca(ICC2/ICC4958)SNP_00148 | 2257 | C | T | 8   | 8   | --        | --    |
| CakTC08793 | Ca(ICC2/ICC4958)SNP_00149 | 448  | T | C | 4   | 3   | --        | --    |
|            | Ca(ICC2/ICC4958)SNP_00150 | 967  | C | T | 15  | 8   | --        | --    |
|            | Ca(ICC2/ICC4958)SNP_00151 | 1726 | C | G | 5   | 3   | --        | --    |
|            | Ca(ICC2/ICC4958)SNP_00152 | 1774 | A | T | 5   | 3   | --        | --    |
|            | Ca(ICC2/ICC4958)SNP_00153 | 2707 | C | T | 3   | 4   | --        | --    |
|            | Ca(ICC2/ICC4958)SNP_00154 | 2959 | C | T | 7   | 6   | --        | --    |
| CakTC20005 | Ca(ICC2/ICC4958)SNP_00155 | 180  | C | T | 3   | 3   | --        | --    |
|            | Ca(ICC2/ICC4958)SNP_00156 | 309  | G | A | 3   | 3   | --        | --    |
| CakTC29229 | Ca(ICC2/ICC4958)SNP_00157 | 894  | A | C | 64  | 60  | --        | --    |
| CakTC26561 | Ca(ICC2/ICC4958)SNP_00158 | 260  | C | T | 3   | 4   | --        | --    |
| CakTC41423 | Ca(ICC2/ICC4958)SNP_00159 | 902  | C | T | 11  | 10  | --        | --    |
|            | Ca(ICC2/ICC4958)SNP_00160 | 1564 | G | A | 6   | 6   | --        | --    |
|            | Ca(ICC2/ICC4958)SNP_00161 | 1571 | T | C | 7   | 5   | --        | --    |
| CakTC38895 | Ca(ICC2/ICC4958)SNP_00162 | 545  | C | T | 38  | 15  | --        | --    |
|            | Ca(ICC2/ICC4958)SNP_00163 | 584  | C | A | 41  | 17  | --        | --    |
|            | Ca(ICC2/ICC4958)SNP_00164 | 590  | T | C | 43  | 16  | --        | --    |
| CakTC37634 | Ca(ICC2/ICC4958)SNP_00165 | 68   | G | A | 4   | 4   | --        | --    |
|            | Ca(ICC2/ICC4958)SNP_00166 | 383  | C | A | 11  | 11  | --        | --    |
|            | Ca(ICC2/ICC4958)SNP_00167 | 595  | C | T | 8   | 13  | --        | --    |
|            | Ca(ICC2/ICC4958)SNP_00168 | 611  | A | G | 6   | 11  | --        | --    |
|            | Ca(ICC2/ICC4958)SNP_00169 | 647  | A | G | 13  | 12  | --        | --    |
| CakTC31897 | Ca(ICC2/ICC4958)SNP_00170 | 3625 | G | A | 9   | 12  | --        | --    |
| CakTC37319 | Ca(ICC2/ICC4958)SNP_00171 | 47   | C | G | 4   | 9   | --        | --    |
|            | Ca(ICC2/ICC4958)SNP_00172 | 242  | G | A | 10  | 20  | --        | --    |
|            | Ca(ICC2/ICC4958)SNP_00173 | 360  | T | C | 10  | 25  | --        | --    |
|            | Ca(ICC2/ICC4958)SNP_00174 | 1108 | G | A | 19  | 26  | --        | --    |
| CakTC32023 | Ca(ICC2/ICC4958)SNP_00175 | 415  | C | G | 4   | 3   | --        | --    |
|            | Ca(ICC2/ICC4958)SNP_00176 | 533  | T | C | 3   | 3   | --        | --    |
| CakTC39596 | Ca(ICC2/ICC4958)SNP_00177 | 180  | T | A | 20  | 16  | --        | --    |
|            | Ca(ICC2/ICC4958)SNP_00178 | 276  | C | T | 19  | 18  | --        | --    |
|            | Ca(ICC2/ICC4958)SNP_00179 | 806  | G | A | 9   | 14  | --        | --    |
|            | Ca(ICC2/ICC4958)SNP_00180 | 952  | C | G | 16  | 16  | --        | --    |
| CakTC23119 | Ca(ICC2/ICC4958)SNP_00181 | 1022 | T | G | 18  | 9   | --        | --    |
|            | Ca(ICC2/ICC4958)SNP_00182 | 1029 | A | T | 18  | 9   | --        | --    |
|            | Ca(ICC2/ICC4958)SNP_00183 | 1041 | C | G | 16  | 9   | --        | --    |
| CakTC23892 | Ca(ICC2/ICC4958)SNP_00184 | 200  | T | A | 296 | 298 | --        | --    |
|            | Ca(ICC2/ICC4958)SNP_00185 | 266  | C | T | 377 | 339 | --        | --    |
|            | Ca(ICC2/ICC4958)SNP_00186 | 398  | C | T | 368 | 360 | --        | --    |
|            | Ca(ICC2/ICC4958)SNP_00187 | 413  | G | C | 373 | 368 | --        | --    |
|            | Ca(ICC2/ICC4958)SNP_00188 | 678  | T | C | 461 | 357 | --        | --    |
|            | Ca(ICC2/ICC4958)SNP_00189 | 777  | A | G | 528 | 424 | --        | --    |
|            | Ca(ICC2/ICC4958)SNP_00190 | 978  | G | T | 579 | 452 | --        | --    |
|            | Ca(ICC2/ICC4958)SNP_00191 | 1344 | G | T | 531 | 465 | --        | --    |
|            | Ca(ICC2/ICC4958)SNP_00192 | 1699 | A | T | 314 | 375 | --        | --    |
| CakTC41505 | Ca(ICC2/ICC4958)SNP_00193 | 628  | A | T | 44  | 27  | --        | --    |
|            | Ca(ICC2/ICC4958)SNP_00194 | 691  | A | G | 27  | 14  | --        | --    |
| CakTC28528 | Ca(ICC2/ICC4958)SNP_00195 | 301  | G | A | 22  | 23  | --        | --    |
| CakTC24442 | Ca(ICC2/ICC4958)SNP_00196 | 1578 | C | G | 28  | 31  | --        | --    |
| CakTC16500 | Ca(ICC2/ICC4958)SNP_00197 | 2064 | G | A | 3   | 3   | --        | --    |
| CakTC29895 | Ca(ICC2/ICC4958)SNP_00198 | 1069 | T | C | 16  | 13  | --        | --    |
| CakTC38663 | Ca(ICC2/ICC4958)SNP_00199 | 1395 | G | A | 5   | 9   | --        | --    |
| CakTC27233 | Ca(ICC2/ICC4958)SNP_00200 | 2698 | C | A | 36  | 23  | --        | --    |
| CakTC35429 | Ca(ICC2/ICC4958)SNP_00201 | 1379 | C | T | 15  | 19  | --        | --    |
| CakTC29297 | Ca(ICC2/ICC4958)SNP_00202 | 198  | A | T | 3   | 4   | --        | HRT   |
|            | Ca(ICC2/ICC4958)SNP_00203 | 200  | G | C | 3   | 4   | --        | HRT   |
| CakTC31950 | Ca(ICC2/ICC4958)SNP_00204 | 358  | G | A | 3   | 14  | Root      | --    |
|            | Ca(ICC2/ICC4958)SNP_00205 | 506  | C | A | 3   | 6   | Root      | --    |
| CakTC08592 | Ca(ICC2/ICC4958)SNP_00206 | 374  | G | A | 8   | 11  | --        | --    |
|            | Ca(ICC2/ICC4958)SNP_00207 | 427  | T | A | 11  | 12  | --        | --    |
|            | Ca(ICC2/ICC4958)SNP_00208 | 451  | T | A | 11  | 12  | --        | --    |
|            | Ca(ICC2/ICC4958)SNP_00209 | 479  | A | T | 11  | 12  | --        | --    |
|            | Ca(ICC2/ICC4958)SNP_00210 | 489  | C | A | 10  | 11  | --        | --    |
|            | Ca(ICC2/ICC4958)SNP_00211 | 550  | G | C | 10  | 9   | --        | --    |
| CakTC22605 | Ca(ICC2/ICC4958)SNP_00212 | 2848 | A | G | 4   | 11  | --        | --    |
| CakTC24361 | Ca(ICC2/ICC4958)SNP_00213 | 1060 | C | T | 3   | 6   | Young_pod | --    |
|            | Ca(ICC2/ICC4958)SNP_00214 | 1096 | C | T | 3   | 9   | Young_pod | --    |
|            | Ca(ICC2/ICC4958)SNP_00215 | 1178 | C | T | 3   | 8   | Young_pod | --    |
| CakTC39411 | Ca(ICC2/ICC4958)SNP_00216 | 1109 | A | C | 4   | 11  | --        | --    |

|            |                            |      |   |   |    |     |             |    |
|------------|----------------------------|------|---|---|----|-----|-------------|----|
| CakTC24695 | Ca(ICCv2/ICC4958)SNP_00217 | 1012 | G | A | 15 | 7   | Mature Leaf | -- |
| CakTC29219 | Ca(ICCv2/ICC4958)SNP_00218 | 32   | A | C | 13 | 10  | --          | -- |
|            | Ca(ICCv2/ICC4958)SNP_00219 | 498  | A | G | 10 | 13  | --          | -- |
|            | Ca(ICCv2/ICC4958)SNP_00220 | 594  | C | T | 11 | 10  | --          | -- |
|            | Ca(ICCv2/ICC4958)SNP_00221 | 657  | T | C | 9  | 9   | --          | -- |
|            | Ca(ICCv2/ICC4958)SNP_00222 | 721  | T | G | 8  | 9   | --          | -- |
| CakTC41707 | Ca(ICCv2/ICC4958)SNP_00223 | 2586 | G | A | 6  | 9   | --          | -- |
| CakTC43139 | Ca(ICCv2/ICC4958)SNP_00224 | 366  | C | T | 27 | 30  | --          | -- |
|            | Ca(ICCv2/ICC4958)SNP_00225 | 427  | T | A | 19 | 26  | --          | -- |
| CakTC20209 | Ca(ICCv2/ICC4958)SNP_00226 | 137  | G | A | 3  | 7   | Young_pod   | -- |
| CakTC34774 | Ca(ICCv2/ICC4958)SNP_00227 | 672  | C | T | 7  | 9   | --          | -- |
| CakTC17161 | Ca(ICCv2/ICC4958)SNP_00228 | 159  | C | A | 3  | 4   | --          | -- |
|            | Ca(ICCv2/ICC4958)SNP_00229 | 163  | G | A | 3  | 4   | --          | -- |
| CakTC30407 | Ca(ICCv2/ICC4958)SNP_00230 | 1579 | A | G | 3  | 6   | --          | -- |
| CakTC29741 | Ca(ICCv2/ICC4958)SNP_00231 | 1415 | C | T | 6  | 10  | --          | -- |
|            | Ca(ICCv2/ICC4958)SNP_00232 | 1588 | G | C | 4  | 8   | --          | -- |
| CakTC33866 | Ca(ICCv2/ICC4958)SNP_00233 | 986  | A | T | 6  | 5   | --          | -- |
| CakTC37968 | Ca(ICCv2/ICC4958)SNP_00234 | 194  | C | T | 5  | 7   | --          | -- |
| CakTC16394 | Ca(ICCv2/ICC4958)SNP_00235 | 70   | G | C | 3  | 3   | --          | -- |
|            | Ca(ICCv2/ICC4958)SNP_00236 | 91   | C | T | 3  | 3   | --          | -- |
| CakTC38349 | Ca(ICCv2/ICC4958)SNP_00237 | 555  | C | T | 5  | 33  | --          | -- |
|            | Ca(ICCv2/ICC4958)SNP_00238 | 765  | A | G | 16 | 62  | --          | -- |
|            | Ca(ICCv2/ICC4958)SNP_00239 | 1147 | G | A | 4  | 3   | --          | -- |
|            | Ca(ICCv2/ICC4958)SNP_00240 | 1175 | C | T | 4  | 4   | --          | -- |
| CakTC13613 | Ca(ICCv2/ICC4958)SNP_00241 | 333  | C | T | 8  | 3   | --          | -- |
|            | Ca(ICCv2/ICC4958)SNP_00242 | 339  | C | A | 8  | 3   | --          | -- |
| CakTC32730 | Ca(ICCv2/ICC4958)SNP_00243 | 642  | T | C | 7  | 3   | --          | -- |
|            | Ca(ICCv2/ICC4958)SNP_00244 | 955  | G | C | 5  | 5   | --          | -- |
|            | Ca(ICCv2/ICC4958)SNP_00245 | 1399 | A | G | 10 | 3   | --          | -- |
|            | Ca(ICCv2/ICC4958)SNP_00246 | 2103 | A | G | 9  | 5   | --          | -- |
| CakTC40607 | Ca(ICCv2/ICC4958)SNP_00247 | 845  | A | G | 8  | 19  | --          | -- |
| CakTC41933 | Ca(ICCv2/ICC4958)SNP_00248 | 713  | T | C | 14 | 5   | --          | -- |
| CakTC42064 | Ca(ICCv2/ICC4958)SNP_00249 | 445  | C | G | 27 | 7   | --          | -- |
| CakTC35408 | Ca(ICCv2/ICC4958)SNP_00250 | 1415 | G | C | 8  | 6   | --          | -- |
| CakTC42116 | Ca(ICCv2/ICC4958)SNP_00251 | 396  | T | C | 4  | 4   | Flower bud  | -- |
|            | Ca(ICCv2/ICC4958)SNP_00252 | 429  | C | T | 4  | 4   | Flower bud  | -- |
|            | Ca(ICCv2/ICC4958)SNP_00253 | 733  | A | G | 4  | 17  | Flower bud  | -- |
| CakTC25884 | Ca(ICCv2/ICC4958)SNP_00254 | 528  | C | T | 13 | 7   | Young_pod   | -- |
|            | Ca(ICCv2/ICC4958)SNP_00255 | 636  | A | G | 15 | 7   | Young_pod   | -- |
|            | Ca(ICCv2/ICC4958)SNP_00256 | 734  | C | T | 9  | 6   | Young_pod   | -- |
| CakTC10574 | Ca(ICCv2/ICC4958)SNP_00257 | 86   | C | A | 5  | 7   | --          | -- |
|            | Ca(ICCv2/ICC4958)SNP_00258 | 150  | C | G | 5  | 7   | --          | -- |
| CakTC26020 | Ca(ICCv2/ICC4958)SNP_00259 | 350  | T | C | 50 | 142 | --          | -- |
| CakTC38231 | Ca(ICCv2/ICC4958)SNP_00260 | 1118 | A | G | 4  | 4   | --          | -- |
| CakTC40053 | Ca(ICCv2/ICC4958)SNP_00261 | 978  | A | G | 52 | 29  | --          | -- |
| CakTC25919 | Ca(ICCv2/ICC4958)SNP_00262 | 571  | T | C | 5  | 15  | --          | -- |
| CakTC11774 | Ca(ICCv2/ICC4958)SNP_00263 | 660  | A | G | 8  | 4   | --          | -- |
|            | Ca(ICCv2/ICC4958)SNP_00264 | 696  | G | A | 11 | 4   | --          | -- |
|            | Ca(ICCv2/ICC4958)SNP_00265 | 1311 | A | C | 7  | 11  | --          | -- |
| CakTC34840 | Ca(ICCv2/ICC4958)SNP_00266 | 809  | A | G | 7  | 8   | --          | -- |
|            | Ca(ICCv2/ICC4958)SNP_00267 | 824  | A | G | 12 | 11  | --          | -- |
|            | Ca(ICCv2/ICC4958)SNP_00268 | 875  | C | T | 10 | 12  | --          | -- |
|            | Ca(ICCv2/ICC4958)SNP_00269 | 1107 | G | A | 12 | 11  | --          | -- |
|            | Ca(ICCv2/ICC4958)SNP_00270 | 1247 | C | T | 13 | 17  | --          | -- |
|            | Ca(ICCv2/ICC4958)SNP_00271 | 1599 | A | T | 4  | 13  | --          | -- |
|            | Ca(ICCv2/ICC4958)SNP_00272 | 1730 | A | G | 9  | 6   | --          | -- |
|            | Ca(ICCv2/ICC4958)SNP_00273 | 2203 | C | T | 9  | 5   | --          | -- |
|            | Ca(ICCv2/ICC4958)SNP_00274 | 2488 | C | T | 4  | 11  | --          | -- |
|            | Ca(ICCv2/ICC4958)SNP_00275 | 2494 | A | G | 3  | 11  | --          | -- |
|            | Ca(ICCv2/ICC4958)SNP_00276 | 2595 | A | G | 3  | 9   | --          | -- |
|            | Ca(ICCv2/ICC4958)SNP_00277 | 2633 | G | A | 6  | 8   | --          | -- |
|            | Ca(ICCv2/ICC4958)SNP_00278 | 2766 | A | G | 7  | 11  | --          | -- |
|            | Ca(ICCv2/ICC4958)SNP_00279 | 2852 | T | C | 10 | 11  | --          | -- |
|            | Ca(ICCv2/ICC4958)SNP_00280 | 2870 | C | T | 11 | 9   | --          | -- |
|            | Ca(ICCv2/ICC4958)SNP_00281 | 3082 | G | A | 10 | 17  | --          | -- |
|            | Ca(ICCv2/ICC4958)SNP_00282 | 3169 | G | C | 12 | 18  | --          | -- |
|            | Ca(ICCv2/ICC4958)SNP_00283 | 3535 | T | C | 10 | 22  | --          | -- |
|            | Ca(ICCv2/ICC4958)SNP_00284 | 3645 | A | G | 7  | 12  | --          | -- |
|            | Ca(ICCv2/ICC4958)SNP_00285 | 3863 | G | T | 4  | 5   | --          | -- |
| CakTC33548 | Ca(ICCv2/ICC4958)SNP_00286 | 418  | G | A | 8  | 12  | --          | -- |
| CakTC22807 | Ca(ICCv2/ICC4958)SNP_00287 | 4584 | G | A | 4  | 7   | --          | -- |
| CakTC36305 | Ca(ICCv2/ICC4958)SNP_00288 | 971  | G | T | 13 | 6   | --          | -- |
| CakTC13792 | Ca(ICCv2/ICC4958)SNP_00289 | 282  | C | T | 10 | 3   | --          | -- |
| CakTC30590 | Ca(ICCv2/ICC4958)SNP_00290 | 1368 | C | G | 3  | 3   | Flower bud  | -- |

|            |                           |      |   |   |    |    |            |      |
|------------|---------------------------|------|---|---|----|----|------------|------|
| CakTC42575 | Ca(ICC2/ICC4958)SNP_00291 | 854  | G | A | 5  | 8  | --         | --   |
|            | Ca(ICC2/ICC4958)SNP_00292 | 974  | C | T | 6  | 6  | --         | --   |
| CakTC27209 | Ca(ICC2/ICC4958)SNP_00293 | 145  | C | T | 10 | 11 | --         | --   |
|            | Ca(ICC2/ICC4958)SNP_00294 | 181  | A | G | 13 | 14 | --         | --   |
|            | Ca(ICC2/ICC4958)SNP_00295 | 385  | G | C | 17 | 54 | --         | --   |
|            | Ca(ICC2/ICC4958)SNP_00296 | 642  | C | T | 47 | 77 | --         | --   |
|            | Ca(ICC2/ICC4958)SNP_00297 | 986  | G | A | 59 | 47 | --         | --   |
| CakTC29587 | Ca(ICC2/ICC4958)SNP_00298 | 1157 | A | G | 4  | 3  | Shoot      | --   |
| CakTC39399 | Ca(ICC2/ICC4958)SNP_00299 | 992  | A | C | 11 | 17 | --         | --   |
| CakTC38341 | Ca(ICC2/ICC4958)SNP_00300 | 2930 | C | T | 3  | 5  | --         | --   |
| CakTC26917 | Ca(ICC2/ICC4958)SNP_00301 | 403  | A | T | 7  | 13 | --         | --   |
|            | Ca(ICC2/ICC4958)SNP_00302 | 588  | C | T | 4  | 17 | --         | --   |
|            | Ca(ICC2/ICC4958)SNP_00303 | 762  | T | C | 5  | 9  | --         | --   |
| CakTC18498 | Ca(ICC2/ICC4958)SNP_00304 | 900  | C | T | 3  | 5  | --         | C2H2 |
| CakTC18903 | Ca(ICC2/ICC4958)SNP_00305 | 3497 | C | G | 5  | 3  | --         | --   |
| CakTC29853 | Ca(ICC2/ICC4958)SNP_00306 | 578  | A | G | 4  | 3  | --         | --   |
|            | Ca(ICC2/ICC4958)SNP_00307 | 613  | A | C | 4  | 3  | --         | --   |
|            | Ca(ICC2/ICC4958)SNP_00308 | 622  | T | C | 3  | 3  | --         | --   |
|            | Ca(ICC2/ICC4958)SNP_00309 | 723  | C | G | 4  | 3  | --         | --   |
|            | Ca(ICC2/ICC4958)SNP_00310 | 743  | G | A | 4  | 3  | --         | --   |
|            | Ca(ICC2/ICC4958)SNP_00311 | 746  | A | T | 4  | 3  | --         | --   |
| CakTC23055 | Ca(ICC2/ICC4958)SNP_00312 | 94   | C | T | 3  | 7  | --         | --   |
|            | Ca(ICC2/ICC4958)SNP_00313 | 97   | T | C | 3  | 7  | --         | --   |
|            | Ca(ICC2/ICC4958)SNP_00314 | 126  | T | C | 3  | 7  | --         | --   |
| CakTC30888 | Ca(ICC2/ICC4958)SNP_00315 | 517  | G | A | 5  | 3  | --         | bHLH |
|            | Ca(ICC2/ICC4958)SNP_00316 | 1470 | T | C | 11 | 13 | --         | bHLH |
| CakTC26987 | Ca(ICC2/ICC4958)SNP_00317 | 622  | T | C | 16 | 7  | --         | --   |
|            | Ca(ICC2/ICC4958)SNP_00318 | 640  | G | A | 16 | 6  | --         | --   |
|            | Ca(ICC2/ICC4958)SNP_00319 | 1189 | A | G | 13 | 3  | --         | --   |
|            | Ca(ICC2/ICC4958)SNP_00320 | 1892 | T | G | 5  | 7  | --         | --   |
| CakTC38056 | Ca(ICC2/ICC4958)SNP_00321 | 962  | A | G | 3  | 8  | --         | --   |
| CakTC42472 | Ca(ICC2/ICC4958)SNP_00322 | 817  | C | T | 5  | 8  | --         | --   |
|            | Ca(ICC2/ICC4958)SNP_00323 | 885  | G | A | 4  | 7  | --         | --   |
| CakTC31791 | Ca(ICC2/ICC4958)SNP_00324 | 1207 | T | C | 10 | 10 | --         | --   |
| CakTC09751 | Ca(ICC2/ICC4958)SNP_00325 | 3972 | G | T | 4  | 5  | --         | --   |
| CakTC31351 | Ca(ICC2/ICC4958)SNP_00326 | 889  | A | G | 5  | 4  | Flower bud | MYB  |
| CakTC42877 | Ca(ICC2/ICC4958)SNP_00327 | 52   | G | A | 10 | 3  | --         | --   |
|            | Ca(ICC2/ICC4958)SNP_00328 | 173  | A | T | 21 | 7  | --         | --   |
|            | Ca(ICC2/ICC4958)SNP_00329 | 585  | A | G | 44 | 46 | --         | --   |
| CakTC38412 | Ca(ICC2/ICC4958)SNP_00330 | 430  | T | C | 14 | 27 | --         | --   |
| CakTC25453 | Ca(ICC2/ICC4958)SNP_00331 | 191  | C | T | 3  | 9  | --         | --   |
| CakTC38074 | Ca(ICC2/ICC4958)SNP_00332 | 353  | G | T | 5  | 5  | --         | --   |
|            | Ca(ICC2/ICC4958)SNP_00333 | 908  | C | A | 4  | 8  | --         | --   |
| CakTC29185 | Ca(ICC2/ICC4958)SNP_00334 | 518  | C | G | 8  | 3  | --         | --   |
|            | Ca(ICC2/ICC4958)SNP_00335 | 529  | G | A | 8  | 5  | --         | --   |
|            | Ca(ICC2/ICC4958)SNP_00336 | 620  | C | G | 3  | 4  | --         | --   |
| CakTC33952 | Ca(ICC2/ICC4958)SNP_00337 | 771  | T | A | 14 | 5  | Shoot      | MYB  |
| CakTC39762 | Ca(ICC2/ICC4958)SNP_00338 | 36   | C | A | 6  | 8  | --         | --   |
| CakTC33125 | Ca(ICC2/ICC4958)SNP_00339 | 124  | G | A | 18 | 21 | --         | --   |
|            | Ca(ICC2/ICC4958)SNP_00340 | 239  | G | A | 47 | 30 | --         | --   |
|            | Ca(ICC2/ICC4958)SNP_00341 | 437  | A | T | 50 | 41 | --         | --   |
|            | Ca(ICC2/ICC4958)SNP_00342 | 1028 | A | C | 55 | 42 | --         | --   |
|            | Ca(ICC2/ICC4958)SNP_00343 | 1078 | A | G | 52 | 47 | --         | --   |
|            | Ca(ICC2/ICC4958)SNP_00344 | 1637 | A | G | 34 | 33 | --         | --   |
|            | Ca(ICC2/ICC4958)SNP_00345 | 1672 | G | C | 37 | 36 | --         | --   |
|            | Ca(ICC2/ICC4958)SNP_00346 | 1673 | G | A | 36 | 36 | --         | --   |
| CakTC35076 | Ca(ICC2/ICC4958)SNP_00347 | 1121 | C | A | 14 | 9  | --         | --   |
| CakTC28555 | Ca(ICC2/ICC4958)SNP_00348 | 1382 | G | C | 17 | 8  | --         | --   |
| CakTC27339 | Ca(ICC2/ICC4958)SNP_00349 | 1546 | G | A | 19 | 24 | --         | --   |
| CakTC39061 | Ca(ICC2/ICC4958)SNP_00350 | 285  | C | A | 11 | 5  | --         | --   |
|            | Ca(ICC2/ICC4958)SNP_00351 | 350  | T | C | 11 | 10 | --         | --   |
|            | Ca(ICC2/ICC4958)SNP_00352 | 627  | A | G | 8  | 11 | --         | --   |
|            | Ca(ICC2/ICC4958)SNP_00353 | 794  | C | T | 10 | 11 | --         | --   |
|            | Ca(ICC2/ICC4958)SNP_00354 | 1177 | C | T | 20 | 7  | --         | --   |
|            | Ca(ICC2/ICC4958)SNP_00355 | 1198 | G | A | 19 | 8  | --         | --   |
|            | Ca(ICC2/ICC4958)SNP_00356 | 1338 | A | T | 20 | 10 | --         | --   |
|            | Ca(ICC2/ICC4958)SNP_00357 | 1430 | T | C | 22 | 11 | --         | --   |
|            | Ca(ICC2/ICC4958)SNP_00358 | 1441 | C | G | 21 | 11 | --         | --   |
|            | Ca(ICC2/ICC4958)SNP_00359 | 1446 | T | C | 21 | 11 | --         | --   |
|            | Ca(ICC2/ICC4958)SNP_00360 | 1480 | G | A | 21 | 9  | --         | --   |
|            | Ca(ICC2/ICC4958)SNP_00361 | 1487 | C | T | 19 | 9  | --         | --   |
| CakTC40639 | Ca(ICC2/ICC4958)SNP_00362 | 153  | G | C | 9  | 11 | --         | --   |
| CakTC23851 | Ca(ICC2/ICC4958)SNP_00363 | 659  | T | A | 7  | 9  | --         | --   |
|            | Ca(ICC2/ICC4958)SNP_00364 | 1511 | G | A | 8  | 11 | --         | --   |

|            |                           |      |   |   |    |    |    |         |
|------------|---------------------------|------|---|---|----|----|----|---------|
|            | Ca(ICC2/ICC4958)SNP_00365 | 2056 | A | G | 4  | 6  | -- | --      |
|            | Ca(ICC2/ICC4958)SNP_00366 | 2123 | C | A | 3  | 4  | -- | --      |
| CakTC30394 | Ca(ICC2/ICC4958)SNP_00367 | 1495 | A | G | 26 | 29 | -- | --      |
| CakTC35229 | Ca(ICC2/ICC4958)SNP_00368 | 225  | T | C | 5  | 3  | -- | --      |
|            | Ca(ICC2/ICC4958)SNP_00369 | 1956 | A | G | 8  | 5  | -- | --      |
|            | Ca(ICC2/ICC4958)SNP_00370 | 2731 | T | C | 3  | 3  | -- | --      |
| CakTC23861 | Ca(ICC2/ICC4958)SNP_00371 | 376  | C | A | 4  | 8  | -- | AUX/IAA |
| CakTC28536 | Ca(ICC2/ICC4958)SNP_00372 | 928  | T | G | 22 | 12 | -- | NAC     |
| CakTC29356 | Ca(ICC2/ICC4958)SNP_00373 | 247  | C | T | 3  | 4  | -- | NAC     |
|            | Ca(ICC2/ICC4958)SNP_00374 | 287  | C | T | 14 | 4  | -- | NAC     |
|            | Ca(ICC2/ICC4958)SNP_00375 | 330  | A | G | 15 | 4  | -- | NAC     |
|            | Ca(ICC2/ICC4958)SNP_00376 | 389  | A | G | 13 | 4  | -- | NAC     |
|            | Ca(ICC2/ICC4958)SNP_00377 | 392  | A | G | 12 | 4  | -- | NAC     |
| CakTC26949 | Ca(ICC2/ICC4958)SNP_00378 | 1636 | G | A | 4  | 9  | -- | --      |
|            | Ca(ICC2/ICC4958)SNP_00379 | 2500 | A | G | 29 | 14 | -- | --      |
| CakTC33153 | Ca(ICC2/ICC4958)SNP_00380 | 3078 | T | A | 22 | 26 | -- | --      |
| CakTC34278 | Ca(ICC2/ICC4958)SNP_00381 | 16   | T | A | 3  | 4  | -- | --      |
| CakTC37569 | Ca(ICC2/ICC4958)SNP_00382 | 142  | A | G | 9  | 10 | -- | --      |
|            | Ca(ICC2/ICC4958)SNP_00383 | 172  | T | C | 9  | 10 | -- | --      |
|            | Ca(ICC2/ICC4958)SNP_00384 | 804  | A | G | 5  | 13 | -- | --      |
| CakTC07323 | Ca(ICC2/ICC4958)SNP_00385 | 1189 | G | A | 4  | 3  | -- | --      |
| CakTC30647 | Ca(ICC2/ICC4958)SNP_00386 | 600  | A | C | 9  | 5  | -- | --      |
| CakTC32345 | Ca(ICC2/ICC4958)SNP_00387 | 1244 | T | C | 10 | 5  | -- | --      |
| CakTC10541 | Ca(ICC2/ICC4958)SNP_00388 | 188  | G | A | 3  | 3  | -- | --      |
| CakTC36198 | Ca(ICC2/ICC4958)SNP_00389 | 875  | G | A | 15 | 6  | -- | --      |
|            | Ca(ICC2/ICC4958)SNP_00390 | 1596 | G | A | 6  | 7  | -- | --      |
| CakTC30780 | Ca(ICC2/ICC4958)SNP_00391 | 1696 | A | C | 3  | 5  | -- | --      |
| CakTC41150 | Ca(ICC2/ICC4958)SNP_00392 | 907  | G | T | 4  | 6  | -- | --      |
| CakTC42271 | Ca(ICC2/ICC4958)SNP_00393 | 928  | C | T | 6  | 4  | -- | --      |
| CakTC22913 | Ca(ICC2/ICC4958)SNP_00394 | 1038 | G | A | 3  | 3  | -- | --      |
| CakTC30128 | Ca(ICC2/ICC4958)SNP_00395 | 461  | G | C | 4  | 3  | -- | --      |
| CakTC39434 | Ca(ICC2/ICC4958)SNP_00396 | 474  | A | G | 16 | 23 | -- | --      |
| CakTC42035 | Ca(ICC2/ICC4958)SNP_00397 | 29   | G | C | 7  | 6  | -- | --      |
|            | Ca(ICC2/ICC4958)SNP_00398 | 73   | T | C | 8  | 7  | -- | --      |
|            | Ca(ICC2/ICC4958)SNP_00399 | 203  | C | T | 9  | 9  | -- | --      |
| CakTC12283 | Ca(ICC2/ICC4958)SNP_00400 | 131  | A | G | 3  | 4  | -- | --      |
| CakTC28092 | Ca(ICC2/ICC4958)SNP_00401 | 311  | C | T | 8  | 9  | -- | --      |
| CakTC29337 | Ca(ICC2/ICC4958)SNP_00402 | 231  | G | C | 3  | 4  | -- | --      |
|            | Ca(ICC2/ICC4958)SNP_00403 | 303  | G | A | 3  | 5  | -- | --      |
| CakTC18325 | Ca(ICC2/ICC4958)SNP_00404 | 1122 | T | G | 8  | 5  | -- | --      |
| CakTC31095 | Ca(ICC2/ICC4958)SNP_00405 | 169  | A | T | 3  | 4  | -- | --      |
|            | Ca(ICC2/ICC4958)SNP_00406 | 211  | A | T | 6  | 5  | -- | --      |
|            | Ca(ICC2/ICC4958)SNP_00407 | 304  | C | T | 6  | 6  | -- | --      |
|            | Ca(ICC2/ICC4958)SNP_00408 | 460  | G | A | 7  | 5  | -- | --      |
|            | Ca(ICC2/ICC4958)SNP_00409 | 898  | C | A | 3  | 4  | -- | --      |
|            | Ca(ICC2/ICC4958)SNP_00410 | 974  | G | A | 3  | 4  | -- | --      |
|            | Ca(ICC2/ICC4958)SNP_00411 | 985  | G | T | 3  | 4  | -- | --      |
|            | Ca(ICC2/ICC4958)SNP_00412 | 1052 | C | A | 3  | 4  | -- | --      |
| CakTC35131 | Ca(ICC2/ICC4958)SNP_00413 | 378  | C | T | 8  | 8  | -- | --      |
|            | Ca(ICC2/ICC4958)SNP_00414 | 1973 | G | C | 6  | 4  | -- | --      |
|            | Ca(ICC2/ICC4958)SNP_00415 | 1997 | T | G | 5  | 5  | -- | --      |
| CakTC10326 | Ca(ICC2/ICC4958)SNP_00416 | 388  | C | T | 13 | 11 | -- | --      |
|            | Ca(ICC2/ICC4958)SNP_00417 | 611  | T | C | 9  | 7  | -- | --      |
|            | Ca(ICC2/ICC4958)SNP_00418 | 1278 | T | G | 18 | 17 | -- | --      |
| CakTC29071 | Ca(ICC2/ICC4958)SNP_00419 | 941  | T | A | 5  | 4  | -- | --      |
| CakTC37106 | Ca(ICC2/ICC4958)SNP_00420 | 1751 | T | C | 3  | 9  | -- | --      |
| CakTC41190 | Ca(ICC2/ICC4958)SNP_00421 | 280  | G | C | 13 | 27 | -- | --      |
| CakTC41753 | Ca(ICC2/ICC4958)SNP_00422 | 660  | C | T | 14 | 20 | -- | --      |
| CakTC27106 | Ca(ICC2/ICC4958)SNP_00423 | 1317 | T | C | 9  | 10 | -- | --      |
| CakTC23673 | Ca(ICC2/ICC4958)SNP_00424 | 729  | A | C | 3  | 3  | -- | --      |
|            | Ca(ICC2/ICC4958)SNP_00425 | 735  | T | C | 4  | 4  | -- | --      |
| CakTC31227 | Ca(ICC2/ICC4958)SNP_00426 | 765  | T | C | 6  | 7  | -- | --      |
| CakTC33643 | Ca(ICC2/ICC4958)SNP_00427 | 2995 | T | C | 5  | 7  | -- | SET     |
|            | Ca(ICC2/ICC4958)SNP_00428 | 2996 | G | T | 5  | 7  | -- | SET     |
| CakTC38945 | Ca(ICC2/ICC4958)SNP_00429 | 575  | T | C | 8  | 3  | -- | --      |
|            | Ca(ICC2/ICC4958)SNP_00430 | 1117 | C | T | 10 | 10 | -- | --      |
|            | Ca(ICC2/ICC4958)SNP_00431 | 1256 | T | A | 8  | 10 | -- | --      |
| CakTC26213 | Ca(ICC2/ICC4958)SNP_00432 | 250  | C | T | 23 | 21 | -- | --      |
| CakTC33899 | Ca(ICC2/ICC4958)SNP_00433 | 568  | T | C | 6  | 12 | -- | --      |
|            | Ca(ICC2/ICC4958)SNP_00434 | 694  | A | G | 7  | 12 | -- | --      |
|            | Ca(ICC2/ICC4958)SNP_00435 | 913  | C | A | 8  | 11 | -- | --      |
|            | Ca(ICC2/ICC4958)SNP_00436 | 1309 | G | A | 8  | 11 | -- | --      |
|            | Ca(ICC2/ICC4958)SNP_00437 | 1384 | A | G | 11 | 11 | -- | --      |
|            | Ca(ICC2/ICC4958)SNP_00438 | 1590 | G | A | 12 | 12 | -- | --      |

|            |                           |      |   |   |    |     |            |      |
|------------|---------------------------|------|---|---|----|-----|------------|------|
| CakTC27626 | Ca(ICC2/ICC4958)SNP_00439 | 839  | G | A | 4  | 9   | --         | --   |
| CakTC31122 | Ca(ICC2/ICC4958)SNP_00440 | 1402 | A | C | 4  | 3   | --         | --   |
|            | Ca(ICC2/ICC4958)SNP_00441 | 2580 | C | G | 6  | 6   | --         | --   |
| CakTC37772 | Ca(ICC2/ICC4958)SNP_00442 | 879  | T | C | 5  | 6   | --         | --   |
|            | Ca(ICC2/ICC4958)SNP_00443 | 1278 | T | C | 3  | 3   | --         | --   |
| CakTC30378 | Ca(ICC2/ICC4958)SNP_00444 | 269  | T | A | 5  | 7   | Shoot      | --   |
|            | Ca(ICC2/ICC4958)SNP_00445 | 270  | T | C | 5  | 6   | Shoot      | --   |
|            | Ca(ICC2/ICC4958)SNP_00446 | 305  | G | A | 9  | 7   | Shoot      | --   |
|            | Ca(ICC2/ICC4958)SNP_00447 | 355  | T | A | 12 | 7   | Shoot      | --   |
|            | Ca(ICC2/ICC4958)SNP_00448 | 359  | T | C | 12 | 5   | Shoot      | --   |
| CakTC39649 | Ca(ICC2/ICC4958)SNP_00449 | 1138 | A | G | 3  | 11  | --         | --   |
| CakTC40942 | Ca(ICC2/ICC4958)SNP_00450 | 732  | G | A | 5  | 8   | --         | --   |
| CakTC39423 | Ca(ICC2/ICC4958)SNP_00451 | 548  | A | G | 4  | 7   | --         | --   |
| CakTC41722 | Ca(ICC2/ICC4958)SNP_00452 | 514  | T | G | 3  | 7   | --         | bZIP |
| CakTC35438 | Ca(ICC2/ICC4958)SNP_00453 | 3097 | C | T | 5  | 10  | --         | C3H  |
| CakTC09306 | Ca(ICC2/ICC4958)SNP_00454 | 564  | T | G | 23 | 15  | --         | CCHC |
|            | Ca(ICC2/ICC4958)SNP_00455 | 610  | A | G | 25 | 10  | --         | CCHC |
|            | Ca(ICC2/ICC4958)SNP_00456 | 1339 | G | A | 12 | 12  | --         | CCHC |
|            | Ca(ICC2/ICC4958)SNP_00457 | 1357 | C | T | 12 | 8   | --         | CCHC |
|            | Ca(ICC2/ICC4958)SNP_00458 | 2082 | T | C | 16 | 8   | --         | CCHC |
|            | Ca(ICC2/ICC4958)SNP_00459 | 3370 | A | G | 6  | 8   | --         | CCHC |
|            | Ca(ICC2/ICC4958)SNP_00460 | 3419 | C | T | 6  | 6   | --         | CCHC |
| CakTC34318 | Ca(ICC2/ICC4958)SNP_00461 | 1691 | C | T | 12 | 25  | --         | --   |
|            | Ca(ICC2/ICC4958)SNP_00462 | 1983 | C | T | 8  | 7   | --         | --   |
|            | Ca(ICC2/ICC4958)SNP_00463 | 2010 | G | C | 8  | 6   | --         | --   |
| CakTC09312 | Ca(ICC2/ICC4958)SNP_00464 | 474  | G | T | 3  | 3   | --         | --   |
| CakTC32617 | Ca(ICC2/ICC4958)SNP_00465 | 529  | A | T | 6  | 15  | --         | --   |
| CakTC34395 | Ca(ICC2/ICC4958)SNP_00466 | 61   | T | C | 9  | 12  | --         | --   |
| CakTC30093 | Ca(ICC2/ICC4958)SNP_00467 | 1150 | C | T | 8  | 9   | Root       | --   |
|            | Ca(ICC2/ICC4958)SNP_00468 | 1174 | G | A | 9  | 9   | Root       | --   |
|            | Ca(ICC2/ICC4958)SNP_00469 | 1264 | G | A | 10 | 12  | Root       | --   |
|            | Ca(ICC2/ICC4958)SNP_00470 | 1405 | T | C | 14 | 14  | Root       | --   |
|            | Ca(ICC2/ICC4958)SNP_00471 | 1641 | C | T | 10 | 6   | Root       | --   |
| CakTC08642 | Ca(ICC2/ICC4958)SNP_00472 | 135  | G | A | 4  | 3   | --         | --   |
|            | Ca(ICC2/ICC4958)SNP_00473 | 141  | T | G | 4  | 3   | --         | --   |
|            | Ca(ICC2/ICC4958)SNP_00474 | 181  | T | A | 5  | 5   | --         | --   |
|            | Ca(ICC2/ICC4958)SNP_00475 | 930  | T | C | 3  | 11  | --         | --   |
|            | Ca(ICC2/ICC4958)SNP_00476 | 1019 | C | T | 3  | 9   | --         | --   |
|            | Ca(ICC2/ICC4958)SNP_00477 | 2063 | G | A | 8  | 12  | --         | --   |
|            | Ca(ICC2/ICC4958)SNP_00478 | 2067 | T | C | 8  | 12  | --         | --   |
| CakTC09968 | Ca(ICC2/ICC4958)SNP_00479 | 1765 | G | A | 10 | 5   | --         | --   |
| CakTC31771 | Ca(ICC2/ICC4958)SNP_00480 | 360  | A | G | 6  | 8   | --         | --   |
| CakTC28369 | Ca(ICC2/ICC4958)SNP_00481 | 1749 | G | A | 5  | 8   | --         | --   |
|            | Ca(ICC2/ICC4958)SNP_00482 | 1755 | G | A | 5  | 8   | --         | --   |
| CakTC31885 | Ca(ICC2/ICC4958)SNP_00483 | 5461 | A | G | 12 | 34  | --         | --   |
|            | Ca(ICC2/ICC4958)SNP_00484 | 8362 | T | C | 19 | 20  | --         | --   |
| CakTC11371 | Ca(ICC2/ICC4958)SNP_00485 | 199  | G | T | 3  | 4   | --         | --   |
|            | Ca(ICC2/ICC4958)SNP_00486 | 1260 | T | C | 5  | 4   | --         | --   |
| CakTC33923 | Ca(ICC2/ICC4958)SNP_00487 | 77   | T | C | 11 | 10  | --         | --   |
| CakTC38639 | Ca(ICC2/ICC4958)SNP_00488 | 1308 | A | G | 14 | 35  | --         | --   |
| CakTC12500 | Ca(ICC2/ICC4958)SNP_00489 | 355  | T | C | 3  | 256 | --         | --   |
|            | Ca(ICC2/ICC4958)SNP_00490 | 370  | T | C | 3  | 243 | --         | --   |
|            | Ca(ICC2/ICC4958)SNP_00491 | 374  | C | A | 3  | 193 | --         | --   |
|            | Ca(ICC2/ICC4958)SNP_00492 | 507  | T | C | 4  | 72  | --         | --   |
|            | Ca(ICC2/ICC4958)SNP_00493 | 519  | C | T | 4  | 67  | --         | --   |
|            | Ca(ICC2/ICC4958)SNP_00494 | 646  | A | G | 4  | 9   | --         | --   |
| CakTC24620 | Ca(ICC2/ICC4958)SNP_00495 | 1830 | T | C | 7  | 13  | --         | --   |
|            | Ca(ICC2/ICC4958)SNP_00496 | 2520 | C | T | 9  | 13  | --         | --   |
|            | Ca(ICC2/ICC4958)SNP_00497 | 3205 | T | A | 4  | 6   | --         | --   |
| CakTC29046 | Ca(ICC2/ICC4958)SNP_00498 | 451  | A | T | 4  | 3   | Root       | --   |
|            | Ca(ICC2/ICC4958)SNP_00499 | 454  | C | T | 4  | 3   | Root       | --   |
|            | Ca(ICC2/ICC4958)SNP_00500 | 463  | C | G | 4  | 3   | Root       | --   |
|            | Ca(ICC2/ICC4958)SNP_00501 | 470  | G | A | 4  | 3   | Root       | --   |
|            | Ca(ICC2/ICC4958)SNP_00502 | 482  | G | A | 4  | 4   | Root       | --   |
|            | Ca(ICC2/ICC4958)SNP_00503 | 506  | C | T | 4  | 4   | Root       | --   |
| CakTC27177 | Ca(ICC2/ICC4958)SNP_00504 | 828  | G | A | 7  | 11  | Young_pod  | --   |
|            | Ca(ICC2/ICC4958)SNP_00505 | 1830 | A | G | 7  | 5   | Young_pod  | --   |
|            | Ca(ICC2/ICC4958)SNP_00506 | 3014 | T | C | 4  | 3   | Young_pod  | --   |
|            | Ca(ICC2/ICC4958)SNP_00507 | 3122 | A | G | 4  | 3   | Young_pod  | --   |
|            | Ca(ICC2/ICC4958)SNP_00508 | 3295 | A | G | 3  | 3   | Young_pod  | --   |
|            | Ca(ICC2/ICC4958)SNP_00509 | 3323 | G | T | 3  | 3   | Young_pod  | --   |
| CakTC37669 | Ca(ICC2/ICC4958)SNP_00510 | 380  | G | A | 5  | 3   | --         | --   |
| CakTC28361 | Ca(ICC2/ICC4958)SNP_00511 | 2658 | G | A | 5  | 9   | Flower bud | --   |
| CakTC10633 | Ca(ICC2/ICC4958)SNP_00512 | 171  | T | C | 3  | 3   | --         | --   |

|            |                           |      |   |   |     |     |      |    |
|------------|---------------------------|------|---|---|-----|-----|------|----|
|            | Ca(ICC2/ICC4958)SNP_00513 | 217  | T | G | 3   | 3   | --   | -- |
|            | Ca(ICC2/ICC4958)SNP_00514 | 711  | G | A | 5   | 3   | --   | -- |
| CakTC35496 | Ca(ICC2/ICC4958)SNP_00515 | 3713 | G | C | 8   | 24  | --   | -- |
| CakTC31819 | Ca(ICC2/ICC4958)SNP_00516 | 645  | C | T | 3   | 3   | --   | -- |
|            | Ca(ICC2/ICC4958)SNP_00517 | 1069 | A | G | 3   | 3   | --   | -- |
| CakTC32644 | Ca(ICC2/ICC4958)SNP_00518 | 521  | T | C | 3   | 3   | --   | -- |
| CakTC29808 | Ca(ICC2/ICC4958)SNP_00519 | 1649 | G | T | 4   | 3   | --   | -- |
|            | Ca(ICC2/ICC4958)SNP_00520 | 1658 | G | A | 5   | 3   | --   | -- |
|            | Ca(ICC2/ICC4958)SNP_00521 | 1704 | C | G | 5   | 3   | --   | -- |
|            | Ca(ICC2/ICC4958)SNP_00522 | 1745 | C | T | 4   | 3   | --   | -- |
|            | Ca(ICC2/ICC4958)SNP_00523 | 1752 | C | T | 3   | 3   | --   | -- |
|            | Ca(ICC2/ICC4958)SNP_00524 | 1785 | T | C | 3   | 3   | --   | -- |
| CakTC32821 | Ca(ICC2/ICC4958)SNP_00525 | 2332 | C | T | 5   | 8   | --   | -- |
| CakTC20145 | Ca(ICC2/ICC4958)SNP_00526 | 390  | A | G | 3   | 3   | --   | -- |
| CakTC29435 | Ca(ICC2/ICC4958)SNP_00527 | 163  | T | C | 18  | 36  | --   | -- |
|            | Ca(ICC2/ICC4958)SNP_00528 | 223  | A | G | 34  | 54  | --   | -- |
|            | Ca(ICC2/ICC4958)SNP_00529 | 307  | A | G | 129 | 156 | --   | -- |
|            | Ca(ICC2/ICC4958)SNP_00530 | 400  | T | G | 188 | 219 | --   | -- |
|            | Ca(ICC2/ICC4958)SNP_00531 | 471  | C | T | 225 | 289 | --   | -- |
|            | Ca(ICC2/ICC4958)SNP_00532 | 631  | C | G | 217 | 369 | --   | -- |
| CakTC33469 | Ca(ICC2/ICC4958)SNP_00533 | 200  | G | A | 12  | 8   | --   | -- |
|            | Ca(ICC2/ICC4958)SNP_00534 | 338  | C | T | 15  | 12  | --   | -- |
|            | Ca(ICC2/ICC4958)SNP_00535 | 464  | C | T | 15  | 6   | --   | -- |
| CakTC11238 | Ca(ICC2/ICC4958)SNP_00536 | 105  | A | T | 14  | 11  | --   | -- |
| CakTC31451 | Ca(ICC2/ICC4958)SNP_00537 | 1053 | G | C | 12  | 4   | --   | -- |
| CakTC24891 | Ca(ICC2/ICC4958)SNP_00538 | 242  | A | G | 11  | 7   | --   | -- |
| CakTC32017 | Ca(ICC2/ICC4958)SNP_00539 | 97   | A | G | 5   | 7   | --   | -- |
|            | Ca(ICC2/ICC4958)SNP_00540 | 951  | G | A | 6   | 4   | --   | -- |
|            | Ca(ICC2/ICC4958)SNP_00541 | 991  | T | C | 6   | 3   | --   | -- |
|            | Ca(ICC2/ICC4958)SNP_00542 | 1501 | G | A | 8   | 6   | --   | -- |
|            | Ca(ICC2/ICC4958)SNP_00543 | 2192 | T | A | 6   | 10  | --   | -- |
|            | Ca(ICC2/ICC4958)SNP_00544 | 2320 | C | T | 3   | 3   | --   | -- |
|            | Ca(ICC2/ICC4958)SNP_00545 | 2334 | A | G | 4   | 3   | --   | -- |
| CakTC40447 | Ca(ICC2/ICC4958)SNP_00546 | 374  | G | A | 25  | 8   | --   | -- |
|            | Ca(ICC2/ICC4958)SNP_00547 | 407  | C | T | 26  | 9   | --   | -- |
|            | Ca(ICC2/ICC4958)SNP_00548 | 422  | G | A | 29  | 8   | --   | -- |
|            | Ca(ICC2/ICC4958)SNP_00549 | 437  | A | G | 24  | 8   | --   | -- |
|            | Ca(ICC2/ICC4958)SNP_00550 | 576  | G | A | 31  | 8   | --   | -- |
|            | Ca(ICC2/ICC4958)SNP_00551 | 584  | A | G | 33  | 8   | --   | -- |
|            | Ca(ICC2/ICC4958)SNP_00552 | 681  | T | C | 29  | 6   | --   | -- |
|            | Ca(ICC2/ICC4958)SNP_00553 | 689  | C | A | 26  | 4   | --   | -- |
|            | Ca(ICC2/ICC4958)SNP_00554 | 719  | T | G | 22  | 5   | --   | -- |
|            | Ca(ICC2/ICC4958)SNP_00555 | 751  | A | G | 20  | 4   | --   | -- |
|            | Ca(ICC2/ICC4958)SNP_00556 | 875  | C | T | 13  | 3   | --   | -- |
|            | Ca(ICC2/ICC4958)SNP_00557 | 897  | C | A | 14  | 3   | --   | -- |
| CakTC28337 | Ca(ICC2/ICC4958)SNP_00558 | 409  | G | A | 3   | 3   | Root | -- |
|            | Ca(ICC2/ICC4958)SNP_00559 | 580  | T | C | 3   | 4   | Root | -- |
|            | Ca(ICC2/ICC4958)SNP_00560 | 2028 | G | C | 14  | 7   | Root | -- |
|            | Ca(ICC2/ICC4958)SNP_00561 | 2085 | C | T | 17  | 9   | Root | -- |
|            | Ca(ICC2/ICC4958)SNP_00562 | 2398 | A | C | 14  | 3   | Root | -- |
|            | Ca(ICC2/ICC4958)SNP_00563 | 2439 | A | C | 14  | 4   | Root | -- |
|            | Ca(ICC2/ICC4958)SNP_00564 | 2693 | T | C | 16  | 5   | Root | -- |
|            | Ca(ICC2/ICC4958)SNP_00565 | 2706 | A | T | 9   | 5   | Root | -- |
|            | Ca(ICC2/ICC4958)SNP_00566 | 2724 | T | C | 16  | 6   | Root | -- |
|            | Ca(ICC2/ICC4958)SNP_00567 | 3140 | G | A | 4   | 4   | Root | -- |
| CakTC00750 | Ca(ICC2/ICC4958)SNP_00568 | 297  | T | A | 3   | 4   | --   | -- |
| CakTC09869 | Ca(ICC2/ICC4958)SNP_00569 | 2219 | C | T | 4   | 6   | --   | -- |
| CakTC43213 | Ca(ICC2/ICC4958)SNP_00570 | 163  | G | A | 4   | 5   | --   | -- |
| CakTC38024 | Ca(ICC2/ICC4958)SNP_00571 | 38   | G | C | 23  | 31  | --   | -- |
|            | Ca(ICC2/ICC4958)SNP_00572 | 487  | C | T | 41  | 39  | --   | -- |
|            | Ca(ICC2/ICC4958)SNP_00573 | 676  | T | A | 46  | 34  | --   | -- |
|            | Ca(ICC2/ICC4958)SNP_00574 | 1123 | C | T | 34  | 63  | --   | -- |
|            | Ca(ICC2/ICC4958)SNP_00575 | 1432 | T | A | 19  | 25  | --   | -- |
| CakTC11410 | Ca(ICC2/ICC4958)SNP_00576 | 241  | G | C | 7   | 17  | --   | -- |
|            | Ca(ICC2/ICC4958)SNP_00577 | 576  | G | A | 13  | 10  | --   | -- |
| CakTC10476 | Ca(ICC2/ICC4958)SNP_00578 | 380  | G | A | 3   | 3   | --   | -- |
|            | Ca(ICC2/ICC4958)SNP_00579 | 404  | A | G | 3   | 3   | --   | -- |
| CakTC42946 | Ca(ICC2/ICC4958)SNP_00580 | 580  | A | G | 3   | 5   | --   | -- |
|            | Ca(ICC2/ICC4958)SNP_00581 | 786  | T | C | 3   | 7   | --   | -- |
|            | Ca(ICC2/ICC4958)SNP_00582 | 880  | A | G | 5   | 11  | --   | -- |
| CakTC40437 | Ca(ICC2/ICC4958)SNP_00583 | 1963 | C | T | 4   | 3   | --   | -- |
| CakTC35659 | Ca(ICC2/ICC4958)SNP_00584 | 80   | C | G | 12  | 10  | --   | -- |
| CakTC34994 | Ca(ICC2/ICC4958)SNP_00585 | 4215 | G | A | 4   | 4   | --   | -- |
| CakTC28206 | Ca(ICC2/ICC4958)SNP_00586 | 460  | A | T | 16  | 19  | --   | -- |

|            |                           |      |   |   |    |    |       |      |
|------------|---------------------------|------|---|---|----|----|-------|------|
|            | Ca(ICC2/ICC4958)SNP_00587 | 1216 | C | T | 28 | 12 | --    | --   |
|            | Ca(ICC2/ICC4958)SNP_00588 | 1252 | T | C | 20 | 9  | --    | --   |
|            | Ca(ICC2/ICC4958)SNP_00589 | 1694 | T | C | 12 | 16 | --    | --   |
| CakTC25149 | Ca(ICC2/ICC4958)SNP_00590 | 781  | C | T | 54 | 43 | --    | --   |
| CakTC40643 | Ca(ICC2/ICC4958)SNP_00591 | 633  | G | A | 9  | 19 | --    | --   |
| CakTC08979 | Ca(ICC2/ICC4958)SNP_00592 | 1712 | T | A | 4  | 3  | --    | --   |
|            | Ca(ICC2/ICC4958)SNP_00593 | 1984 | T | C | 3  | 5  | --    | --   |
|            | Ca(ICC2/ICC4958)SNP_00594 | 1988 | C | T | 3  | 4  | --    | --   |
| CakTC23920 | Ca(ICC2/ICC4958)SNP_00595 | 2775 | G | A | 4  | 11 | --    | --   |
| CakTC25449 | Ca(ICC2/ICC4958)SNP_00596 | 735  | T | C | 18 | 8  | --    | ARF  |
| CakTC32689 | Ca(ICC2/ICC4958)SNP_00597 | 578  | A | G | 5  | 12 | --    | --   |
| CakTC33458 | Ca(ICC2/ICC4958)SNP_00598 | 34   | T | C | 4  | 6  | --    | --   |
|            | Ca(ICC2/ICC4958)SNP_00599 | 539  | C | T | 25 | 25 | --    | --   |
|            | Ca(ICC2/ICC4958)SNP_00600 | 588  | G | C | 24 | 32 | --    | --   |
|            | Ca(ICC2/ICC4958)SNP_00601 | 651  | T | C | 27 | 33 | --    | --   |
| CakTC32025 | Ca(ICC2/ICC4958)SNP_00602 | 409  | C | T | 3  | 5  | --    | GeBP |
| CakTC09183 | Ca(ICC2/ICC4958)SNP_00603 | 2826 | A | G | 3  | 4  | --    | --   |
| CakTC10569 | Ca(ICC2/ICC4958)SNP_00604 | 281  | A | G | 4  | 5  | Root  | --   |
| CakTC38093 | Ca(ICC2/ICC4958)SNP_00605 | 365  | G | T | 7  | 8  | --    | --   |
| CakTC32334 | Ca(ICC2/ICC4958)SNP_00606 | 1344 | T | G | 7  | 13 | --    | --   |
| CakTC12042 | Ca(ICC2/ICC4958)SNP_00607 | 153  | T | C | 3  | 7  | --    | --   |
| CakTC39733 | Ca(ICC2/ICC4958)SNP_00608 | 53   | A | G | 6  | 3  | --    | --   |
|            | Ca(ICC2/ICC4958)SNP_00609 | 341  | C | T | 5  | 6  | --    | --   |
|            | Ca(ICC2/ICC4958)SNP_00610 | 998  | A | T | 6  | 3  | --    | --   |
| CakTC24619 | Ca(ICC2/ICC4958)SNP_00611 | 1187 | A | T | 6  | 4  | --    | --   |
|            | Ca(ICC2/ICC4958)SNP_00612 | 1872 | G | A | 7  | 6  | --    | --   |
|            | Ca(ICC2/ICC4958)SNP_00613 | 2328 | C | G | 8  | 8  | --    | --   |
|            | Ca(ICC2/ICC4958)SNP_00614 | 2562 | A | G | 13 | 12 | --    | --   |
|            | Ca(ICC2/ICC4958)SNP_00615 | 3012 | T | C | 8  | 11 | --    | --   |
|            | Ca(ICC2/ICC4958)SNP_00616 | 4024 | C | T | 8  | 4  | --    | --   |
|            | Ca(ICC2/ICC4958)SNP_00617 | 4089 | A | G | 11 | 7  | --    | --   |
| CakTC14889 | Ca(ICC2/ICC4958)SNP_00618 | 1931 | A | G | 3  | 3  | --    | --   |
| CakTC02884 | Ca(ICC2/ICC4958)SNP_00619 | 483  | C | T | 5  | 3  | --    | --   |
|            | Ca(ICC2/ICC4958)SNP_00620 | 538  | T | C | 4  | 3  | --    | --   |
|            | Ca(ICC2/ICC4958)SNP_00621 | 565  | C | T | 3  | 3  | --    | --   |
|            | Ca(ICC2/ICC4958)SNP_00622 | 1898 | T | C | 3  | 4  | --    | --   |
| CakTC39127 | Ca(ICC2/ICC4958)SNP_00623 | 274  | G | A | 21 | 8  | --    | bZIP |
|            | Ca(ICC2/ICC4958)SNP_00624 | 1171 | T | G | 24 | 41 | --    | bZIP |
| CakTC09083 | Ca(ICC2/ICC4958)SNP_00625 | 1411 | T | G | 8  | 3  | --    | --   |
| CakTC25879 | Ca(ICC2/ICC4958)SNP_00626 | 107  | C | T | 15 | 37 | --    | --   |
|            | Ca(ICC2/ICC4958)SNP_00627 | 140  | C | A | 15 | 37 | --    | --   |
|            | Ca(ICC2/ICC4958)SNP_00628 | 182  | T | C | 14 | 40 | --    | --   |
|            | Ca(ICC2/ICC4958)SNP_00629 | 224  | C | A | 13 | 40 | --    | --   |
|            | Ca(ICC2/ICC4958)SNP_00630 | 308  | A | C | 10 | 28 | --    | --   |
| CakTC38766 | Ca(ICC2/ICC4958)SNP_00631 | 56   | G | C | 14 | 14 | --    | --   |
|            | Ca(ICC2/ICC4958)SNP_00632 | 1105 | A | G | 18 | 27 | --    | --   |
|            | Ca(ICC2/ICC4958)SNP_00633 | 1200 | G | A | 10 | 13 | --    | --   |
| CakTC43107 | Ca(ICC2/ICC4958)SNP_00634 | 837  | C | T | 12 | 11 | --    | HB   |
|            | Ca(ICC2/ICC4958)SNP_00635 | 965  | C | T | 11 | 8  | --    | HB   |
|            | Ca(ICC2/ICC4958)SNP_00636 | 1265 | G | A | 9  | 10 | --    | HB   |
|            | Ca(ICC2/ICC4958)SNP_00637 | 1386 | G | A | 13 | 10 | --    | HB   |
|            | Ca(ICC2/ICC4958)SNP_00638 | 1745 | C | G | 4  | 6  | --    | HB   |
|            | Ca(ICC2/ICC4958)SNP_00639 | 1755 | A | G | 4  | 6  | --    | HB   |
|            | Ca(ICC2/ICC4958)SNP_00640 | 1757 | A | G | 3  | 4  | --    | HB   |
| CakTC11680 | Ca(ICC2/ICC4958)SNP_00641 | 1710 | T | C | 3  | 5  | --    | --   |
|            | Ca(ICC2/ICC4958)SNP_00642 | 1818 | G | A | 3  | 3  | --    | --   |
| CakTC28715 | Ca(ICC2/ICC4958)SNP_00643 | 390  | T | C | 11 | 7  | --    | --   |
| CakTC38910 | Ca(ICC2/ICC4958)SNP_00644 | 933  | C | T | 6  | 3  | Shoot | --   |
|            | Ca(ICC2/ICC4958)SNP_00645 | 1225 | T | A | 4  | 8  | Shoot | --   |
|            | Ca(ICC2/ICC4958)SNP_00646 | 1289 | A | G | 3  | 7  | Shoot | --   |
| CakTC10926 | Ca(ICC2/ICC4958)SNP_00647 | 325  | A | G | 16 | 8  | --    | GRAS |
|            | Ca(ICC2/ICC4958)SNP_00648 | 502  | G | A | 10 | 5  | --    | GRAS |
|            | Ca(ICC2/ICC4958)SNP_00649 | 883  | A | G | 9  | 6  | --    | GRAS |
|            | Ca(ICC2/ICC4958)SNP_00650 | 907  | T | C | 7  | 5  | --    | GRAS |
|            | Ca(ICC2/ICC4958)SNP_00651 | 1161 | C | T | 5  | 3  | --    | GRAS |
|            | Ca(ICC2/ICC4958)SNP_00652 | 1260 | A | G | 7  | 4  | --    | GRAS |
|            | Ca(ICC2/ICC4958)SNP_00653 | 1315 | C | T | 5  | 3  | --    | GRAS |
|            | Ca(ICC2/ICC4958)SNP_00654 | 1426 | A | G | 3  | 3  | --    | GRAS |
|            | Ca(ICC2/ICC4958)SNP_00655 | 1473 | C | T | 5  | 3  | --    | GRAS |
|            | Ca(ICC2/ICC4958)SNP_00656 | 1694 | A | C | 10 | 3  | --    | GRAS |
|            | Ca(ICC2/ICC4958)SNP_00657 | 1758 | G | A | 10 | 3  | --    | GRAS |
|            | Ca(ICC2/ICC4958)SNP_00658 | 2471 | T | A | 10 | 6  | --    | GRAS |
| CakTC32144 | Ca(ICC2/ICC4958)SNP_00659 | 428  | G | T | 8  | 7  | --    | --   |
|            | Ca(ICC2/ICC4958)SNP_00660 | 696  | A | G | 8  | 8  | --    | --   |

|            |                           |      |   |   |    |    |             |      |
|------------|---------------------------|------|---|---|----|----|-------------|------|
| CakTC39397 | Ca(ICC2/ICC4958)SNP_00661 | 864  | G | A | 35 | 20 | --          | --   |
|            | Ca(ICC2/ICC4958)SNP_00662 | 938  | G | A | 34 | 20 | --          | --   |
|            | Ca(ICC2/ICC4958)SNP_00663 | 1025 | T | A | 28 | 17 | --          | --   |
|            | Ca(ICC2/ICC4958)SNP_00664 | 1033 | T | C | 27 | 21 | --          | --   |
|            | Ca(ICC2/ICC4958)SNP_00665 | 1232 | C | T | 9  | 17 | --          | --   |
|            | Ca(ICC2/ICC4958)SNP_00666 | 1265 | A | G | 8  | 11 | --          | --   |
|            | Ca(ICC2/ICC4958)SNP_00667 | 1280 | G | C | 8  | 11 | --          | --   |
|            | Ca(ICC2/ICC4958)SNP_00668 | 1433 | T | G | 5  | 9  | --          | --   |
|            | Ca(ICC2/ICC4958)SNP_00669 | 1467 | C | T | 5  | 9  | --          | --   |
| CakTC38702 | Ca(ICC2/ICC4958)SNP_00670 | 8    | G | A | 3  | 4  | --          | --   |
| CakTC34664 | Ca(ICC2/ICC4958)SNP_00671 | 738  | C | A | 4  | 6  | --          | --   |
| CakTC08061 | Ca(ICC2/ICC4958)SNP_00672 | 2687 | G | A | 7  | 7  | --          | --   |
|            | Ca(ICC2/ICC4958)SNP_00673 | 2696 | C | T | 7  | 6  | --          | --   |
| CakTC41687 | Ca(ICC2/ICC4958)SNP_00674 | 1593 | G | T | 3  | 5  | --          | --   |
| CakTC09432 | Ca(ICC2/ICC4958)SNP_00675 | 1538 | G | A | 3  | 7  | --          | --   |
| CakTC29743 | Ca(ICC2/ICC4958)SNP_00676 | 275  | A | C | 5  | 8  | --          | --   |
|            | Ca(ICC2/ICC4958)SNP_00677 | 292  | A | G | 6  | 9  | --          | --   |
|            | Ca(ICC2/ICC4958)SNP_00678 | 418  | G | A | 7  | 8  | --          | --   |
|            | Ca(ICC2/ICC4958)SNP_00679 | 493  | G | A | 6  | 8  | --          | --   |
| CakTC08324 | Ca(ICC2/ICC4958)SNP_00680 | 239  | C | T | 36 | 68 | --          | --   |
|            | Ca(ICC2/ICC4958)SNP_00681 | 347  | A | G | 39 | 83 | --          | --   |
| CakTC22251 | Ca(ICC2/ICC4958)SNP_00682 | 340  | G | A | 3  | 3  | --          | --   |
| CakTC30913 | Ca(ICC2/ICC4958)SNP_00683 | 503  | T | G | 7  | 3  | --          | --   |
| CakTC14942 | Ca(ICC2/ICC4958)SNP_00684 | 205  | T | C | 4  | 4  | --          | --   |
| CakTC26361 | Ca(ICC2/ICC4958)SNP_00685 | 181  | T | C | 3  | 3  | --          | --   |
| CakTC39381 | Ca(ICC2/ICC4958)SNP_00686 | 466  | C | T | 23 | 28 | --          | --   |
|            | Ca(ICC2/ICC4958)SNP_00687 | 684  | T | C | 29 | 18 | --          | --   |
|            | Ca(ICC2/ICC4958)SNP_00688 | 865  | A | G | 25 | 19 | --          | --   |
|            | Ca(ICC2/ICC4958)SNP_00689 | 874  | C | T | 28 | 20 | --          | --   |
| CakTC25721 | Ca(ICC2/ICC4958)SNP_00690 | 2926 | T | C | 17 | 25 | --          | --   |
| CakTC26607 | Ca(ICC2/ICC4958)SNP_00691 | 3006 | T | C | 3  | 4  | --          | --   |
| CakTC41157 | Ca(ICC2/ICC4958)SNP_00692 | 327  | A | G | 3  | 6  | Root        | --   |
| CakTC33787 | Ca(ICC2/ICC4958)SNP_00693 | 377  | A | C | 4  | 10 | --          | --   |
| CakTC35633 | Ca(ICC2/ICC4958)SNP_00694 | 1195 | T | C | 3  | 7  | --          | --   |
| CakTC05322 | Ca(ICC2/ICC4958)SNP_00695 | 334  | T | G | 6  | 7  | --          | --   |
|            | Ca(ICC2/ICC4958)SNP_00696 | 1958 | A | T | 3  | 7  | --          | --   |
| CakTC36992 | Ca(ICC2/ICC4958)SNP_00697 | 1428 | G | T | 9  | 9  | --          | --   |
|            | Ca(ICC2/ICC4958)SNP_00698 | 1691 | G | A | 4  | 4  | --          | --   |
|            | Ca(ICC2/ICC4958)SNP_00699 | 1736 | T | C | 5  | 5  | --          | --   |
| CakTC37983 | Ca(ICC2/ICC4958)SNP_00700 | 283  | C | T | 10 | 7  | --          | SRS  |
| CakTC12085 | Ca(ICC2/ICC4958)SNP_00701 | 330  | T | C | 17 | 37 | --          | --   |
| CakTC33129 | Ca(ICC2/ICC4958)SNP_00702 | 1929 | C | G | 11 | 5  | Mature Leaf | --   |
|            | Ca(ICC2/ICC4958)SNP_00703 | 2193 | G | A | 15 | 7  | Mature Leaf | --   |
|            | Ca(ICC2/ICC4958)SNP_00704 | 2233 | G | C | 13 | 4  | Mature Leaf | --   |
| CakTC40198 | Ca(ICC2/ICC4958)SNP_00705 | 122  | T | C | 7  | 11 | --          | --   |
|            | Ca(ICC2/ICC4958)SNP_00706 | 132  | C | T | 9  | 12 | --          | --   |
| CakTC42092 | Ca(ICC2/ICC4958)SNP_00707 | 540  | T | C | 30 | 25 | Flower bud  | MADS |
|            | Ca(ICC2/ICC4958)SNP_00708 | 615  | G | A | 29 | 26 | Flower bud  | MADS |
|            | Ca(ICC2/ICC4958)SNP_00709 | 684  | C | G | 28 | 26 | Flower bud  | MADS |
| CakTC40367 | Ca(ICC2/ICC4958)SNP_00710 | 639  | G | A | 26 | 7  | --          | --   |
| CakTC28059 | Ca(ICC2/ICC4958)SNP_00711 | 1751 | G | A | 13 | 6  | --          | --   |
| CakTC30893 | Ca(ICC2/ICC4958)SNP_00712 | 465  | C | T | 3  | 3  | Flower bud  | --   |
|            | Ca(ICC2/ICC4958)SNP_00713 | 501  | T | C | 3  | 3  | Flower bud  | --   |
|            | Ca(ICC2/ICC4958)SNP_00714 | 521  | C | T | 3  | 3  | Flower bud  | --   |
| CakTC39180 | Ca(ICC2/ICC4958)SNP_00715 | 533  | G | A | 55 | 28 | --          | Tify |
| CakTC39941 | Ca(ICC2/ICC4958)SNP_00716 | 931  | G | A | 3  | 5  | --          | --   |
| CakTC41294 | Ca(ICC2/ICC4958)SNP_00717 | 794  | C | A | 4  | 3  | --          | --   |
| CakTC37356 | Ca(ICC2/ICC4958)SNP_00718 | 228  | T | C | 5  | 6  | --          | --   |
| CakTC29365 | Ca(ICC2/ICC4958)SNP_00719 | 1115 | T | C | 3  | 3  | --          | --   |
|            | Ca(ICC2/ICC4958)SNP_00720 | 1150 | C | T | 3  | 3  | --          | --   |
|            | Ca(ICC2/ICC4958)SNP_00721 | 1408 | T | C | 5  | 3  | --          | --   |
|            | Ca(ICC2/ICC4958)SNP_00722 | 1417 | C | T | 5  | 3  | --          | --   |
|            | Ca(ICC2/ICC4958)SNP_00723 | 1512 | C | A | 4  | 3  | --          | --   |
|            | Ca(ICC2/ICC4958)SNP_00724 | 1540 | A | C | 4  | 3  | --          | --   |
| CakTC23372 | Ca(ICC2/ICC4958)SNP_00725 | 93   | T | C | 3  | 3  | --          | --   |
| CakTC24621 | Ca(ICC2/ICC4958)SNP_00726 | 449  | C | T | 8  | 3  | --          | --   |
|            | Ca(ICC2/ICC4958)SNP_00727 | 561  | C | T | 4  | 3  | --          | --   |
| CakTC10720 | Ca(ICC2/ICC4958)SNP_00728 | 2552 | G | A | 8  | 3  | --          | --   |
| CakTC27796 | Ca(ICC2/ICC4958)SNP_00729 | 373  | T | C | 15 | 20 | --          | --   |
|            | Ca(ICC2/ICC4958)SNP_00730 | 2790 | G | T | 10 | 5  | --          | --   |
| CakTC18104 | Ca(ICC2/ICC4958)SNP_00731 | 1466 | G | T | 3  | 8  | --          | --   |
| CakTC13914 | Ca(ICC2/ICC4958)SNP_00732 | 792  | A | G | 3  | 5  | --          | --   |
| CakTC41340 | Ca(ICC2/ICC4958)SNP_00733 | 647  | G | A | 10 | 3  | --          | --   |
|            | Ca(ICC2/ICC4958)SNP_00734 | 699  | A | G | 10 | 6  | --          | --   |

|            |                           |      |   |   |    |    |            |     |
|------------|---------------------------|------|---|---|----|----|------------|-----|
|            | Ca(ICC2/ICC4958)SNP_00735 | 873  | G | A | 3  | 6  | --         | --  |
| CakTC18835 | Ca(ICC2/ICC4958)SNP_00736 | 465  | A | T | 3  | 9  | Young_pod  | --  |
| CakTC36968 | Ca(ICC2/ICC4958)SNP_00737 | 32   | G | A | 4  | 22 | --         | --  |
|            | Ca(ICC2/ICC4958)SNP_00738 | 101  | C | A | 4  | 44 | --         | --  |
|            | Ca(ICC2/ICC4958)SNP_00739 | 342  | G | A | 3  | 49 | --         | --  |
| CakTC11336 | Ca(ICC2/ICC4958)SNP_00740 | 240  | T | C | 3  | 9  | Shoot      | --  |
|            | Ca(ICC2/ICC4958)SNP_00741 | 363  | C | T | 4  | 5  | Shoot      | --  |
|            | Ca(ICC2/ICC4958)SNP_00742 | 422  | T | A | 3  | 4  | Shoot      | --  |
| CakTC09754 | Ca(ICC2/ICC4958)SNP_00743 | 795  | A | G | 8  | 12 | --         | --  |
|            | Ca(ICC2/ICC4958)SNP_00744 | 824  | A | G | 9  | 10 | --         | --  |
|            | Ca(ICC2/ICC4958)SNP_00745 | 827  | G | A | 9  | 10 | --         | --  |
| CakTC39135 | Ca(ICC2/ICC4958)SNP_00746 | 934  | A | G | 23 | 11 | --         | --  |
| CakTC12538 | Ca(ICC2/ICC4958)SNP_00747 | 461  | A | C | 8  | 3  | --         | --  |
|            | Ca(ICC2/ICC4958)SNP_00748 | 756  | G | A | 16 | 8  | --         | --  |
|            | Ca(ICC2/ICC4958)SNP_00749 | 923  | T | C | 14 | 10 | --         | --  |
|            | Ca(ICC2/ICC4958)SNP_00750 | 1200 | A | G | 3  | 6  | --         | --  |
| CakTC27317 | Ca(ICC2/ICC4958)SNP_00751 | 2662 | A | G | 5  | 3  | --         | --  |
| CakTC31925 | Ca(ICC2/ICC4958)SNP_00752 | 862  | C | T | 4  | 7  | --         | --  |
| CakTC27755 | Ca(ICC2/ICC4958)SNP_00753 | 611  | T | G | 4  | 3  | --         | --  |
|            | Ca(ICC2/ICC4958)SNP_00754 | 624  | G | C | 4  | 3  | --         | --  |
|            | Ca(ICC2/ICC4958)SNP_00755 | 670  | G | C | 8  | 3  | --         | --  |
|            | Ca(ICC2/ICC4958)SNP_00756 | 1502 | C | T | 6  | 7  | --         | --  |
| CakTC24364 | Ca(ICC2/ICC4958)SNP_00757 | 1607 | T | G | 10 | 15 | --         | --  |
|            | Ca(ICC2/ICC4958)SNP_00758 | 1660 | G | C | 7  | 14 | --         | --  |
|            | Ca(ICC2/ICC4958)SNP_00759 | 1710 | C | T | 8  | 10 | --         | --  |
| CakTC27950 | Ca(ICC2/ICC4958)SNP_00760 | 449  | T | C | 8  | 21 | --         | --  |
| CakTC32891 | Ca(ICC2/ICC4958)SNP_00761 | 280  | A | G | 5  | 7  | --         | --  |
| CakTC32108 | Ca(ICC2/ICC4958)SNP_00762 | 59   | A | G | 9  | 15 | --         | --  |
|            | Ca(ICC2/ICC4958)SNP_00763 | 64   | G | C | 9  | 15 | --         | --  |
|            | Ca(ICC2/ICC4958)SNP_00764 | 253  | A | T | 14 | 18 | --         | --  |
|            | Ca(ICC2/ICC4958)SNP_00765 | 286  | C | A | 13 | 15 | --         | --  |
|            | Ca(ICC2/ICC4958)SNP_00766 | 484  | C | G | 7  | 11 | --         | --  |
|            | Ca(ICC2/ICC4958)SNP_00767 | 1861 | A | T | 4  | 15 | --         | --  |
|            | Ca(ICC2/ICC4958)SNP_00768 | 2031 | A | G | 5  | 16 | --         | --  |
|            | Ca(ICC2/ICC4958)SNP_00769 | 2118 | A | G | 6  | 11 | --         | --  |
|            | Ca(ICC2/ICC4958)SNP_00770 | 2292 | G | A | 6  | 6  | --         | --  |
| CakTC34810 | Ca(ICC2/ICC4958)SNP_00771 | 940  | T | C | 10 | 12 | --         | --  |
| CakTC33518 | Ca(ICC2/ICC4958)SNP_00772 | 312  | C | G | 17 | 4  | --         | --  |
| CakTC25687 | Ca(ICC2/ICC4958)SNP_00773 | 473  | C | A | 4  | 3  | Flower bud | --  |
|            | Ca(ICC2/ICC4958)SNP_00774 | 521  | C | A | 4  | 3  | Flower bud | --  |
|            | Ca(ICC2/ICC4958)SNP_00775 | 530  | A | C | 4  | 3  | Flower bud | --  |
|            | Ca(ICC2/ICC4958)SNP_00776 | 540  | A | C | 4  | 3  | Flower bud | --  |
|            | Ca(ICC2/ICC4958)SNP_00777 | 543  | T | G | 4  | 3  | Flower bud | --  |
| CakTC14670 | Ca(ICC2/ICC4958)SNP_00778 | 732  | T | C | 9  | 4  | --         | --  |
|            | Ca(ICC2/ICC4958)SNP_00779 | 1251 | C | T | 9  | 13 | --         | --  |
|            | Ca(ICC2/ICC4958)SNP_00780 | 1836 | C | T | 7  | 10 | --         | --  |
|            | Ca(ICC2/ICC4958)SNP_00781 | 2010 | C | G | 13 | 9  | --         | --  |
|            | Ca(ICC2/ICC4958)SNP_00782 | 2109 | G | T | 13 | 7  | --         | --  |
|            | Ca(ICC2/ICC4958)SNP_00783 | 2190 | G | A | 15 | 19 | --         | --  |
|            | Ca(ICC2/ICC4958)SNP_00784 | 2988 | C | T | 7  | 8  | --         | --  |
|            | Ca(ICC2/ICC4958)SNP_00785 | 3240 | C | T | 10 | 6  | --         | --  |
| CakTC12116 | Ca(ICC2/ICC4958)SNP_00786 | 374  | T | A | 4  | 3  | --         | --  |
|            | Ca(ICC2/ICC4958)SNP_00787 | 437  | A | G | 4  | 3  | --         | --  |
| CakTC36457 | Ca(ICC2/ICC4958)SNP_00788 | 2635 | A | G | 30 | 59 | --         | --  |
| CakTC37419 | Ca(ICC2/ICC4958)SNP_00789 | 414  | C | T | 4  | 4  | --         | --  |
|            | Ca(ICC2/ICC4958)SNP_00790 | 703  | T | A | 4  | 8  | --         | --  |
| CakTC35897 | Ca(ICC2/ICC4958)SNP_00791 | 417  | G | A | 5  | 13 | --         | --  |
| CakTC09773 | Ca(ICC2/ICC4958)SNP_00792 | 677  | C | A | 4  | 3  | --         | --  |
| CakTC00293 | Ca(ICC2/ICC4958)SNP_00793 | 1041 | C | T | 7  | 5  | --         | --  |
| CakTC35224 | Ca(ICC2/ICC4958)SNP_00794 | 906  | C | T | 13 | 9  | --         | SET |
| CakTC40768 | Ca(ICC2/ICC4958)SNP_00795 | 960  | T | G | 7  | 9  | --         | --  |
| CakTC22469 | Ca(ICC2/ICC4958)SNP_00796 | 686  | T | G | 3  | 3  | --         | --  |
| CakTC42236 | Ca(ICC2/ICC4958)SNP_00797 | 1471 | T | C | 13 | 14 | --         | --  |
| CakTC25003 | Ca(ICC2/ICC4958)SNP_00798 | 548  | C | T | 6  | 4  | --         | --  |
| CakTC28500 | Ca(ICC2/ICC4958)SNP_00799 | 788  | A | G | 18 | 13 | --         | --  |
| CakTC37966 | Ca(ICC2/ICC4958)SNP_00800 | 394  | G | A | 10 | 10 | --         | --  |
| CakTC39662 | Ca(ICC2/ICC4958)SNP_00801 | 220  | A | T | 6  | 7  | --         | --  |
|            | Ca(ICC2/ICC4958)SNP_00802 | 316  | A | G | 6  | 10 | --         | --  |
|            | Ca(ICC2/ICC4958)SNP_00803 | 755  | T | C | 4  | 12 | --         | --  |
|            | Ca(ICC2/ICC4958)SNP_00804 | 773  | T | C | 3  | 12 | --         | --  |
|            | Ca(ICC2/ICC4958)SNP_00805 | 968  | A | C | 7  | 13 | --         | --  |
|            | Ca(ICC2/ICC4958)SNP_00806 | 1181 | T | G | 8  | 15 | --         | --  |
|            | Ca(ICC2/ICC4958)SNP_00807 | 1250 | A | G | 6  | 17 | --         | --  |
|            | Ca(ICC2/ICC4958)SNP_00808 | 1472 | A | G | 4  | 15 | --         | --  |

|            |                           |      |   |   |     |    |      |             |
|------------|---------------------------|------|---|---|-----|----|------|-------------|
|            | Ca(ICC2/ICC4958)SNP_00809 | 1478 | A | G | 4   | 16 | --   | --          |
| CakTC40388 | Ca(ICC2/ICC4958)SNP_00810 | 757  | C | T | 3   | 6  | --   | --          |
| CakTC33086 | Ca(ICC2/ICC4958)SNP_00811 | 1532 | A | C | 14  | 13 | --   | --          |
| CakTC41022 | Ca(ICC2/ICC4958)SNP_00812 | 156  | G | T | 4   | 4  | --   | --          |
| CakTC14068 | Ca(ICC2/ICC4958)SNP_00813 | 363  | G | A | 6   | 3  | --   | --          |
| CakTC32264 | Ca(ICC2/ICC4958)SNP_00814 | 1388 | C | G | 5   | 4  | --   | --          |
| CakTC27189 | Ca(ICC2/ICC4958)SNP_00815 | 473  | A | G | 4   | 3  | Root | --          |
| CakTC10820 | Ca(ICC2/ICC4958)SNP_00816 | 1331 | T | C | 3   | 5  | --   | --          |
| CakTC12698 | Ca(ICC2/ICC4958)SNP_00817 | 612  | T | C | 11  | 9  | --   | --          |
|            | Ca(ICC2/ICC4958)SNP_00818 | 2339 | T | C | 5   | 4  | --   | --          |
| CakTC31898 | Ca(ICC2/ICC4958)SNP_00819 | 1218 | C | T | 7   | 3  | --   | --          |
|            | Ca(ICC2/ICC4958)SNP_00820 | 1261 | C | T | 4   | 3  | --   | --          |
|            | Ca(ICC2/ICC4958)SNP_00821 | 1263 | C | G | 4   | 3  | --   | --          |
|            | Ca(ICC2/ICC4958)SNP_00822 | 1283 | C | T | 4   | 3  | --   | --          |
| CakTC38830 | Ca(ICC2/ICC4958)SNP_00823 | 1005 | C | T | 13  | 27 | --   | MYB         |
|            | Ca(ICC2/ICC4958)SNP_00824 | 1362 | C | T | 5   | 5  | --   | MYB         |
| CakTC33767 | Ca(ICC2/ICC4958)SNP_00825 | 145  | A | G | 5   | 15 | --   | --          |
| CakTC10369 | Ca(ICC2/ICC4958)SNP_00826 | 946  | T | C | 12  | 11 | --   | --          |
| CakTC31181 | Ca(ICC2/ICC4958)SNP_00827 | 814  | C | T | 3   | 4  | --   | --          |
|            | Ca(ICC2/ICC4958)SNP_00828 | 901  | A | G | 4   | 4  | --   | --          |
| CakTC28772 | Ca(ICC2/ICC4958)SNP_00829 | 1057 | C | T | 6   | 4  | --   | --          |
| CakTC36652 | Ca(ICC2/ICC4958)SNP_00830 | 2548 | G | A | 50  | 49 | --   | ARF         |
| CakTC32172 | Ca(ICC2/ICC4958)SNP_00831 | 1173 | T | A | 7   | 10 | --   | MYB-related |
| CakTC33315 | Ca(ICC2/ICC4958)SNP_00832 | 286  | A | G | 5   | 10 | --   | --          |
|            | Ca(ICC2/ICC4958)SNP_00833 | 293  | A | C | 6   | 13 | --   | --          |
|            | Ca(ICC2/ICC4958)SNP_00834 | 386  | C | G | 10  | 17 | --   | --          |
|            | Ca(ICC2/ICC4958)SNP_00835 | 396  | C | T | 10  | 18 | --   | --          |
|            | Ca(ICC2/ICC4958)SNP_00836 | 488  | C | G | 9   | 17 | --   | --          |
|            | Ca(ICC2/ICC4958)SNP_00837 | 501  | A | G | 9   | 17 | --   | --          |
|            | Ca(ICC2/ICC4958)SNP_00838 | 624  | C | T | 4   | 17 | --   | --          |
| CakTC41436 | Ca(ICC2/ICC4958)SNP_00839 | 1409 | A | G | 8   | 7  | --   | --          |
| CakTC25653 | Ca(ICC2/ICC4958)SNP_00840 | 1739 | C | A | 117 | 34 | --   | --          |
| CakTC36960 | Ca(ICC2/ICC4958)SNP_00841 | 396  | T | A | 5   | 5  | --   | --          |
| CakTC32088 | Ca(ICC2/ICC4958)SNP_00842 | 1455 | C | T | 4   | 9  | --   | --          |
|            | Ca(ICC2/ICC4958)SNP_00843 | 1683 | C | T | 4   | 13 | --   | --          |
| CakTC42296 | Ca(ICC2/ICC4958)SNP_00844 | 1134 | T | C | 12  | 9  | --   | --          |
| CakTC14534 | Ca(ICC2/ICC4958)SNP_00845 | 914  | A | G | 3   | 5  | --   | --          |
| CakTC43032 | Ca(ICC2/ICC4958)SNP_00846 | 277  | A | G | 4   | 7  | --   | --          |
|            | Ca(ICC2/ICC4958)SNP_00847 | 1515 | G | T | 12  | 18 | --   | --          |
| CakTC35723 | Ca(ICC2/ICC4958)SNP_00848 | 454  | T | C | 7   | 8  | --   | --          |
| CakTC25254 | Ca(ICC2/ICC4958)SNP_00849 | 1061 | A | G | 3   | 4  | --   | --          |
|            | Ca(ICC2/ICC4958)SNP_00850 | 1076 | T | C | 3   | 5  | --   | --          |
|            | Ca(ICC2/ICC4958)SNP_00851 | 1371 | G | A | 5   | 3  | --   | --          |
| CakTC28858 | Ca(ICC2/ICC4958)SNP_00852 | 451  | T | C | 4   | 3  | --   | --          |
|            | Ca(ICC2/ICC4958)SNP_00853 | 454  | T | C | 4   | 3  | --   | --          |
|            | Ca(ICC2/ICC4958)SNP_00854 | 466  | T | C | 4   | 3  | --   | --          |
|            | Ca(ICC2/ICC4958)SNP_00855 | 494  | T | C | 4   | 3  | --   | --          |
|            | Ca(ICC2/ICC4958)SNP_00856 | 523  | A | G | 3   | 4  | --   | --          |
| CakTC29897 | Ca(ICC2/ICC4958)SNP_00857 | 648  | A | G | 6   | 12 | --   | --          |
| CakTC35762 | Ca(ICC2/ICC4958)SNP_00858 | 2970 | A | C | 10  | 12 | --   | --          |
|            | Ca(ICC2/ICC4958)SNP_00859 | 3003 | T | C | 10  | 6  | --   | --          |
|            | Ca(ICC2/ICC4958)SNP_00860 | 3045 | C | T | 8   | 7  | --   | --          |
| CakTC27107 | Ca(ICC2/ICC4958)SNP_00861 | 2034 | T | C | 7   | 7  | --   | --          |
| CakTC23000 | Ca(ICC2/ICC4958)SNP_00862 | 285  | G | C | 6   | 3  | --   | --          |
| CakTC40093 | Ca(ICC2/ICC4958)SNP_00863 | 596  | G | A | 14  | 9  | --   | BBR/BPC     |
| CakTC42070 | Ca(ICC2/ICC4958)SNP_00864 | 182  | C | A | 7   | 4  | --   | --          |
|            | Ca(ICC2/ICC4958)SNP_00865 | 260  | C | T | 6   | 4  | --   | --          |
|            | Ca(ICC2/ICC4958)SNP_00866 | 340  | C | G | 11  | 3  | --   | --          |
|            | Ca(ICC2/ICC4958)SNP_00867 | 559  | G | T | 14  | 4  | --   | --          |
|            | Ca(ICC2/ICC4958)SNP_00868 | 652  | C | T | 11  | 5  | --   | --          |
|            | Ca(ICC2/ICC4958)SNP_00869 | 700  | G | T | 11  | 6  | --   | --          |
|            | Ca(ICC2/ICC4958)SNP_00870 | 738  | G | C | 11  | 6  | --   | --          |
|            | Ca(ICC2/ICC4958)SNP_00871 | 838  | G | C | 7   | 7  | --   | --          |
|            | Ca(ICC2/ICC4958)SNP_00872 | 1530 | G | T | 7   | 3  | --   | --          |
|            | Ca(ICC2/ICC4958)SNP_00873 | 1540 | A | C | 8   | 3  | --   | --          |
| CakTC35321 | Ca(ICC2/ICC4958)SNP_00874 | 282  | A | G | 4   | 20 | --   | --          |
|            | Ca(ICC2/ICC4958)SNP_00875 | 1172 | G | T | 8   | 16 | --   | --          |
|            | Ca(ICC2/ICC4958)SNP_00876 | 2661 | A | G | 3   | 8  | --   | --          |
|            | Ca(ICC2/ICC4958)SNP_00877 | 2686 | A | G | 3   | 5  | --   | --          |
|            | Ca(ICC2/ICC4958)SNP_00878 | 2961 | A | G | 4   | 10 | --   | --          |
| CakTC23148 | Ca(ICC2/ICC4958)SNP_00879 | 25   | A | T | 3   | 4  | --   | --          |
|            | Ca(ICC2/ICC4958)SNP_00880 | 38   | T | C | 3   | 4  | --   | --          |
|            | Ca(ICC2/ICC4958)SNP_00881 | 73   | A | C | 4   | 4  | --   | --          |
| CakTC22587 | Ca(ICC2/ICC4958)SNP_00882 | 1126 | G | A | 3   | 3  | --   | --          |

|            |                           |      |   |   |     |     |            |           |
|------------|---------------------------|------|---|---|-----|-----|------------|-----------|
|            | Ca(ICC2/ICC4958)SNP_00883 | 1128 | T | A | 3   | 5   | --         | --        |
|            | Ca(ICC2/ICC4958)SNP_00884 | 1144 | A | G | 3   | 4   | --         | --        |
|            | Ca(ICC2/ICC4958)SNP_00885 | 1145 | A | G | 3   | 4   | --         | --        |
| CakTC12400 | Ca(ICC2/ICC4958)SNP_00886 | 384  | A | C | 3   | 3   | --         | --        |
|            | Ca(ICC2/ICC4958)SNP_00887 | 393  | C | T | 4   | 3   | --         | --        |
| CakTC37311 | Ca(ICC2/ICC4958)SNP_00888 | 1659 | C | T | 5   | 4   | --         | --        |
| CakTC39931 | Ca(ICC2/ICC4958)SNP_00889 | 815  | C | T | 3   | 3   | --         | --        |
|            | Ca(ICC2/ICC4958)SNP_00890 | 843  | G | A | 3   | 3   | --         | --        |
|            | Ca(ICC2/ICC4958)SNP_00891 | 879  | T | C | 3   | 6   | --         | --        |
| CakTC34289 | Ca(ICC2/ICC4958)SNP_00892 | 321  | G | C | 14  | 7   | --         | --        |
|            | Ca(ICC2/ICC4958)SNP_00893 | 1007 | T | G | 8   | 23  | --         | --        |
|            | Ca(ICC2/ICC4958)SNP_00894 | 1571 | C | G | 8   | 15  | --         | --        |
|            | Ca(ICC2/ICC4958)SNP_00895 | 1740 | A | G | 6   | 10  | --         | --        |
| CakTC10646 | Ca(ICC2/ICC4958)SNP_00896 | 82   | A | T | 3   | 3   | --         | --        |
|            | Ca(ICC2/ICC4958)SNP_00897 | 131  | A | T | 3   | 5   | --         | --        |
|            | Ca(ICC2/ICC4958)SNP_00898 | 277  | G | A | 6   | 6   | --         | --        |
| CakTC25878 | Ca(ICC2/ICC4958)SNP_00899 | 138  | C | T | 188 | 286 | --         | --        |
|            | Ca(ICC2/ICC4958)SNP_00900 | 171  | C | A | 189 | 266 | --         | --        |
|            | Ca(ICC2/ICC4958)SNP_00901 | 213  | T | C | 187 | 305 | --         | --        |
|            | Ca(ICC2/ICC4958)SNP_00902 | 255  | C | A | 195 | 309 | --         | --        |
|            | Ca(ICC2/ICC4958)SNP_00903 | 339  | A | C | 210 | 308 | --         | --        |
|            | Ca(ICC2/ICC4958)SNP_00904 | 423  | T | A | 155 | 236 | --         | --        |
|            | Ca(ICC2/ICC4958)SNP_00905 | 435  | C | T | 115 | 219 | --         | --        |
|            | Ca(ICC2/ICC4958)SNP_00906 | 473  | G | A | 22  | 101 | --         | --        |
|            | Ca(ICC2/ICC4958)SNP_00907 | 563  | G | A | 12  | 53  | --         | --        |
| CakTC29842 | Ca(ICC2/ICC4958)SNP_00908 | 1660 | G | A | 4   | 3   | --         | --        |
|            | Ca(ICC2/ICC4958)SNP_00909 | 2427 | G | T | 4   | 3   | --         | --        |
| CakTC12180 | Ca(ICC2/ICC4958)SNP_00910 | 87   | A | C | 3   | 3   | --         | --        |
|            | Ca(ICC2/ICC4958)SNP_00911 | 122  | C | T | 3   | 3   | --         | --        |
|            | Ca(ICC2/ICC4958)SNP_00912 | 132  | A | C | 3   | 3   | --         | --        |
|            | Ca(ICC2/ICC4958)SNP_00913 | 149  | C | T | 3   | 3   | --         | --        |
|            | Ca(ICC2/ICC4958)SNP_00914 | 174  | T | C | 3   | 3   | --         | --        |
|            | Ca(ICC2/ICC4958)SNP_00915 | 226  | A | G | 3   | 3   | --         | --        |
|            | Ca(ICC2/ICC4958)SNP_00916 | 240  | A | T | 3   | 3   | --         | --        |
|            | Ca(ICC2/ICC4958)SNP_00917 | 346  | T | A | 3   | 3   | --         | --        |
|            | Ca(ICC2/ICC4958)SNP_00918 | 347  | T | A | 3   | 3   | --         | --        |
| CakTC11091 | Ca(ICC2/ICC4958)SNP_00919 | 346  | C | T | 6   | 3   | --         | --        |
| CakTC40725 | Ca(ICC2/ICC4958)SNP_00920 | 435  | G | A | 12  | 13  | --         | --        |
|            | Ca(ICC2/ICC4958)SNP_00921 | 495  | G | A | 8   | 9   | --         | --        |
| CakTC10545 | Ca(ICC2/ICC4958)SNP_00922 | 497  | T | G | 3   | 6   | --         | --        |
| CakTC37918 | Ca(ICC2/ICC4958)SNP_00923 | 747  | G | A | 12  | 9   | --         | HSF       |
| CakTC38636 | Ca(ICC2/ICC4958)SNP_00924 | 497  | C | G | 9   | 10  | --         | --        |
| CakTC22357 | Ca(ICC2/ICC4958)SNP_00925 | 3204 | G | T | 5   | 5   | --         | --        |
|            | Ca(ICC2/ICC4958)SNP_00926 | 3219 | C | A | 5   | 5   | --         | --        |
|            | Ca(ICC2/ICC4958)SNP_00927 | 3224 | C | A | 4   | 5   | --         | --        |
|            | Ca(ICC2/ICC4958)SNP_00928 | 3243 | C | T | 5   | 5   | --         | --        |
|            | Ca(ICC2/ICC4958)SNP_00929 | 3278 | C | A | 5   | 5   | --         | --        |
|            | Ca(ICC2/ICC4958)SNP_00930 | 3290 | A | T | 4   | 5   | --         | --        |
|            | Ca(ICC2/ICC4958)SNP_00931 | 3312 | G | T | 4   | 5   | --         | --        |
|            | Ca(ICC2/ICC4958)SNP_00932 | 3338 | G | A | 5   | 5   | --         | --        |
|            | Ca(ICC2/ICC4958)SNP_00933 | 3343 | G | A | 3   | 5   | --         | --        |
| CakTC42044 | Ca(ICC2/ICC4958)SNP_00934 | 1494 | G | A | 12  | 5   | --         | --        |
|            | Ca(ICC2/ICC4958)SNP_00935 | 1884 | A | G | 6   | 7   | --         | --        |
| CakTC10919 | Ca(ICC2/ICC4958)SNP_00936 | 149  | G | C | 7   | 13  | --         | AP2-EREBP |
| CakTC29382 | Ca(ICC2/ICC4958)SNP_00937 | 899  | C | G | 3   | 3   | --         | --        |
| CakTC09975 | Ca(ICC2/ICC4958)SNP_00938 | 414  | G | T | 4   | 7   | --         | --        |
|            | Ca(ICC2/ICC4958)SNP_00939 | 420  | G | A | 6   | 6   | --         | --        |
|            | Ca(ICC2/ICC4958)SNP_00940 | 480  | T | C | 11  | 3   | --         | --        |
|            | Ca(ICC2/ICC4958)SNP_00941 | 608  | T | C | 11  | 4   | --         | --        |
|            | Ca(ICC2/ICC4958)SNP_00942 | 612  | T | C | 12  | 6   | --         | --        |
|            | Ca(ICC2/ICC4958)SNP_00943 | 1713 | G | A | 6   | 12  | --         | --        |
|            | Ca(ICC2/ICC4958)SNP_00944 | 1968 | A | G | 6   | 9   | --         | --        |
| CakTC28564 | Ca(ICC2/ICC4958)SNP_00945 | 821  | A | G | 6   | 7   | --         | --        |
| CakTC30819 | Ca(ICC2/ICC4958)SNP_00946 | 160  | A | T | 9   | 3   | --         | HB        |
|            | Ca(ICC2/ICC4958)SNP_00947 | 178  | T | G | 8   | 3   | --         | HB        |
|            | Ca(ICC2/ICC4958)SNP_00948 | 184  | C | T | 7   | 3   | --         | HB        |
|            | Ca(ICC2/ICC4958)SNP_00949 | 343  | T | C | 8   | 3   | --         | HB        |
| CakTC09763 | Ca(ICC2/ICC4958)SNP_00950 | 4476 | A | C | 4   | 4   | --         | --        |
| CakTC27705 | Ca(ICC2/ICC4958)SNP_00951 | 391  | A | T | 10  | 3   | Flower bud | --        |
|            | Ca(ICC2/ICC4958)SNP_00952 | 1000 | G | A | 9   | 6   | Flower bud | --        |
|            | Ca(ICC2/ICC4958)SNP_00953 | 2817 | T | G | 9   | 4   | Flower bud | --        |
| CakTC12086 | Ca(ICC2/ICC4958)SNP_00954 | 646  | G | A | 3   | 6   | --         | --        |
|            | Ca(ICC2/ICC4958)SNP_00955 | 667  | C | T | 3   | 4   | --         | --        |
|            | Ca(ICC2/ICC4958)SNP_00956 | 718  | T | C | 3   | 3   | --         | --        |

|            |                           |      |   |   |    |     |             |              |
|------------|---------------------------|------|---|---|----|-----|-------------|--------------|
|            | Ca(ICC2/ICC4958)SNP_00957 | 756  | C | A | 4  | 4   | --          | --           |
|            | Ca(ICC2/ICC4958)SNP_00958 | 774  | A | G | 4  | 4   | --          | --           |
|            | Ca(ICC2/ICC4958)SNP_00959 | 790  | A | G | 4  | 3   | --          | --           |
|            | Ca(ICC2/ICC4958)SNP_00960 | 827  | A | G | 4  | 3   | --          | --           |
|            | Ca(ICC2/ICC4958)SNP_00961 | 876  | G | T | 3  | 3   | --          | --           |
| CakTC41855 | Ca(ICC2/ICC4958)SNP_00962 | 290  | G | C | 6  | 8   | --          | --           |
| CakTC42635 | Ca(ICC2/ICC4958)SNP_00963 | 197  | C | T | 4  | 12  | --          | --           |
|            | Ca(ICC2/ICC4958)SNP_00964 | 231  | T | C | 3  | 15  | --          | --           |
|            | Ca(ICC2/ICC4958)SNP_00965 | 887  | A | G | 5  | 18  | --          | --           |
|            | Ca(ICC2/ICC4958)SNP_00966 | 899  | G | A | 4  | 18  | --          | --           |
|            | Ca(ICC2/ICC4958)SNP_00967 | 973  | G | C | 6  | 21  | --          | --           |
|            | Ca(ICC2/ICC4958)SNP_00968 | 1184 | A | G | 17 | 18  | --          | --           |
|            | Ca(ICC2/ICC4958)SNP_00969 | 1679 | A | G | 6  | 11  | --          | --           |
|            | Ca(ICC2/ICC4958)SNP_00970 | 1694 | C | T | 6  | 11  | --          | --           |
|            | Ca(ICC2/ICC4958)SNP_00971 | 1701 | A | G | 6  | 11  | --          | --           |
| CakTC41649 | Ca(ICC2/ICC4958)SNP_00972 | 471  | T | C | 3  | 10  | Shoot       | --           |
|            | Ca(ICC2/ICC4958)SNP_00973 | 595  | T | G | 8  | 12  | Shoot       | --           |
|            | Ca(ICC2/ICC4958)SNP_00974 | 1039 | T | C | 9  | 19  | Shoot       | --           |
|            | Ca(ICC2/ICC4958)SNP_00975 | 1497 | G | A | 10 | 24  | Shoot       | --           |
|            | Ca(ICC2/ICC4958)SNP_00976 | 1502 | A | G | 13 | 26  | Shoot       | --           |
|            | Ca(ICC2/ICC4958)SNP_00977 | 1962 | T | A | 14 | 29  | Shoot       | --           |
|            | Ca(ICC2/ICC4958)SNP_00978 | 2187 | G | A | 8  | 5   | Shoot       | --           |
| CakTC23770 | Ca(ICC2/ICC4958)SNP_00979 | 3063 | G | T | 22 | 16  | --          | --           |
| CakTC40548 | Ca(ICC2/ICC4958)SNP_00980 | 204  | T | A | 8  | 9   | --          | --           |
| CakTC34146 | Ca(ICC2/ICC4958)SNP_00981 | 1143 | C | A | 7  | 12  | --          | C3H          |
| CakTC34446 | Ca(ICC2/ICC4958)SNP_00982 | 1345 | A | G | 11 | 13  | --          | --           |
| CakTC24545 | Ca(ICC2/ICC4958)SNP_00983 | 47   | C | T | 11 | 4   | --          | --           |
|            | Ca(ICC2/ICC4958)SNP_00984 | 258  | T | C | 32 | 14  | --          | --           |
|            | Ca(ICC2/ICC4958)SNP_00985 | 420  | C | T | 33 | 19  | --          | --           |
|            | Ca(ICC2/ICC4958)SNP_00986 | 2862 | G | A | 11 | 39  | --          | --           |
|            | Ca(ICC2/ICC4958)SNP_00987 | 3151 | A | T | 38 | 46  | --          | --           |
| CakTC27015 | Ca(ICC2/ICC4958)SNP_00988 | 2549 | G | A | 54 | 157 | --          | --           |
|            | Ca(ICC2/ICC4958)SNP_00989 | 2735 | A | G | 61 | 135 | --          | --           |
| CakTC29740 | Ca(ICC2/ICC4958)SNP_00990 | 715  | T | G | 6  | 7   | --          | SWI/SNF-SWI3 |
|            | Ca(ICC2/ICC4958)SNP_00991 | 925  | C | T | 7  | 6   | --          | SWI/SNF-SWI3 |
|            | Ca(ICC2/ICC4958)SNP_00992 | 978  | A | T | 9  | 7   | --          | SWI/SNF-SWI3 |
|            | Ca(ICC2/ICC4958)SNP_00993 | 990  | T | C | 9  | 7   | --          | SWI/SNF-SWI3 |
|            | Ca(ICC2/ICC4958)SNP_00994 | 1120 | C | T | 6  | 7   | --          | SWI/SNF-SWI3 |
|            | Ca(ICC2/ICC4958)SNP_00995 | 1154 | G | A | 11 | 8   | --          | SWI/SNF-SWI3 |
|            | Ca(ICC2/ICC4958)SNP_00996 | 2572 | T | A | 3  | 6   | --          | SWI/SNF-SWI3 |
|            | Ca(ICC2/ICC4958)SNP_00997 | 3622 | T | C | 9  | 5   | --          | SWI/SNF-SWI3 |
|            | Ca(ICC2/ICC4958)SNP_00998 | 4676 | C | A | 6  | 9   | --          | SWI/SNF-SWI3 |
|            | Ca(ICC2/ICC4958)SNP_00999 | 4856 | C | T | 7  | 7   | --          | SWI/SNF-SWI3 |
|            | Ca(ICC2/ICC4958)SNP_01000 | 5558 | G | A | 9  | 13  | --          | SWI/SNF-SWI3 |
|            | Ca(ICC2/ICC4958)SNP_01001 | 5648 | T | A | 10 | 9   | --          | SWI/SNF-SWI3 |
|            | Ca(ICC2/ICC4958)SNP_01002 | 6145 | T | C | 13 | 5   | --          | SWI/SNF-SWI3 |
|            | Ca(ICC2/ICC4958)SNP_01003 | 6397 | C | T | 8  | 6   | --          | SWI/SNF-SWI3 |
| CakTC25045 | Ca(ICC2/ICC4958)SNP_01004 | 510  | A | G | 5  | 8   | --          | --           |
| CakTC27295 | Ca(ICC2/ICC4958)SNP_01005 | 440  | T | C | 3  | 3   | --          | --           |
| CakTC37097 | Ca(ICC2/ICC4958)SNP_01006 | 2480 | G | C | 17 | 47  | --          | --           |
| CakTC43389 | Ca(ICC2/ICC4958)SNP_01007 | 116  | T | A | 10 | 7   | --          | --           |
|            | Ca(ICC2/ICC4958)SNP_01008 | 637  | G | A | 21 | 5   | --          | --           |
|            | Ca(ICC2/ICC4958)SNP_01009 | 779  | G | C | 21 | 5   | --          | --           |
|            | Ca(ICC2/ICC4958)SNP_01010 | 881  | G | A | 15 | 5   | --          | --           |
| CakTC40847 | Ca(ICC2/ICC4958)SNP_01011 | 223  | A | G | 66 | 175 | --          | --           |
| CakTC22404 | Ca(ICC2/ICC4958)SNP_01012 | 7233 | G | A | 3  | 4   | --          | --           |
| CakTC27398 | Ca(ICC2/ICC4958)SNP_01013 | 6253 | C | T | 7  | 4   | Flower bud  | --           |
| CakTC40707 | Ca(ICC2/ICC4958)SNP_01014 | 437  | A | G | 6  | 9   | --          | --           |
| CakTC38863 | Ca(ICC2/ICC4958)SNP_01015 | 190  | A | G | 8  | 14  | Flower bud  | --           |
|            | Ca(ICC2/ICC4958)SNP_01016 | 414  | T | C | 31 | 24  | Flower bud  | --           |
|            | Ca(ICC2/ICC4958)SNP_01017 | 576  | C | T | 61 | 46  | Flower bud  | --           |
|            | Ca(ICC2/ICC4958)SNP_01018 | 1356 | C | A | 37 | 19  | Flower bud  | --           |
| CakTC32215 | Ca(ICC2/ICC4958)SNP_01019 | 282  | C | T | 4  | 5   | --          | --           |
|            | Ca(ICC2/ICC4958)SNP_01020 | 321  | A | G | 4  | 5   | --          | --           |
| CakTC32117 | Ca(ICC2/ICC4958)SNP_01021 | 1702 | A | T | 5  | 4   | Shoot       | SET          |
| CakTC41046 | Ca(ICC2/ICC4958)SNP_01022 | 308  | T | G | 12 | 20  | --          | --           |
|            | Ca(ICC2/ICC4958)SNP_01023 | 310  | A | T | 12 | 19  | --          | --           |
|            | Ca(ICC2/ICC4958)SNP_01024 | 472  | A | T | 22 | 20  | --          | --           |
| CakTC29410 | Ca(ICC2/ICC4958)SNP_01025 | 403  | A | G | 5  | 6   | Mature Leaf | --           |
|            | Ca(ICC2/ICC4958)SNP_01026 | 766  | C | T | 4  | 3   | Mature Leaf | --           |
| CakTC11585 | Ca(ICC2/ICC4958)SNP_01027 | 167  | G | A | 6  | 8   | --          | --           |
|            | Ca(ICC2/ICC4958)SNP_01028 | 613  | C | T | 8  | 8   | --          | --           |
|            | Ca(ICC2/ICC4958)SNP_01029 | 787  | T | C | 11 | 11  | --          | --           |
|            | Ca(ICC2/ICC4958)SNP_01030 | 913  | C | T | 6  | 7   | --          | --           |

|            |                           |      |   |   |     |     |            |         |
|------------|---------------------------|------|---|---|-----|-----|------------|---------|
| CakTC11747 | Ca(ICC2/ICC4958)SNP_01031 | 2312 | A | T | 5   | 5   | --         | --      |
|            | Ca(ICC2/ICC4958)SNP_01032 | 2324 | T | A | 4   | 5   | --         | --      |
| CakTC29401 | Ca(ICC2/ICC4958)SNP_01033 | 154  | G | A | 33  | 11  | --         | --      |
| CakTC40335 | Ca(ICC2/ICC4958)SNP_01034 | 641  | G | C | 12  | 18  | --         | TPR     |
|            | Ca(ICC2/ICC4958)SNP_01035 | 672  | C | G | 12  | 17  | --         | TPR     |
|            | Ca(ICC2/ICC4958)SNP_01036 | 682  | C | G | 12  | 16  | --         | TPR     |
| CakTC09582 | Ca(ICC2/ICC4958)SNP_01037 | 865  | C | T | 7   | 4   | --         | --      |
| CakTC30335 | Ca(ICC2/ICC4958)SNP_01038 | 563  | C | A | 7   | 5   | Shoot      | --      |
| CakTC36486 | Ca(ICC2/ICC4958)SNP_01039 | 336  | T | C | 4   | 6   | Young_pod  | --      |
|            | Ca(ICC2/ICC4958)SNP_01040 | 341  | A | C | 4   | 6   | Young_pod  | --      |
|            | Ca(ICC2/ICC4958)SNP_01041 | 348  | C | T | 4   | 5   | Young_pod  | --      |
| CakTC24397 | Ca(ICC2/ICC4958)SNP_01042 | 768  | G | A | 16  | 18  | --         | G2-like |
| CakTC08782 | Ca(ICC2/ICC4958)SNP_01043 | 360  | C | T | 6   | 5   | --         | --      |
|            | Ca(ICC2/ICC4958)SNP_01044 | 633  | C | T | 3   | 6   | --         | --      |
|            | Ca(ICC2/ICC4958)SNP_01045 | 945  | T | C | 7   | 4   | --         | --      |
| CakTC29824 | Ca(ICC2/ICC4958)SNP_01046 | 251  | A | T | 82  | 214 | --         | --      |
|            | Ca(ICC2/ICC4958)SNP_01047 | 721  | A | T | 239 | 381 | --         | --      |
| CakTC14579 | Ca(ICC2/ICC4958)SNP_01048 | 522  | A | G | 3   | 3   | --         | --      |
|            | Ca(ICC2/ICC4958)SNP_01049 | 536  | C | G | 3   | 3   | --         | --      |
| CakTC28122 | Ca(ICC2/ICC4958)SNP_01050 | 637  | T | C | 3   | 5   | --         | --      |
|            | Ca(ICC2/ICC4958)SNP_01051 | 939  | A | C | 4   | 4   | --         | --      |
| CakTC37176 | Ca(ICC2/ICC4958)SNP_01052 | 1556 | C | T | 6   | 5   | --         | --      |
| CakTC04539 | Ca(ICC2/ICC4958)SNP_01053 | 943  | G | C | 6   | 6   | --         | --      |
|            | Ca(ICC2/ICC4958)SNP_01054 | 1029 | A | G | 4   | 6   | --         | --      |
|            | Ca(ICC2/ICC4958)SNP_01055 | 1094 | C | A | 3   | 5   | --         | --      |
| CakTC29030 | Ca(ICC2/ICC4958)SNP_01056 | 34   | A | G | 5   | 6   | --         | --      |
| CakTC35907 | Ca(ICC2/ICC4958)SNP_01057 | 230  | C | T | 3   | 8   | --         | --      |
| CakTC11512 | Ca(ICC2/ICC4958)SNP_01058 | 150  | C | T | 29  | 57  | --         | --      |
| CakTC26598 | Ca(ICC2/ICC4958)SNP_01059 | 372  | C | T | 13  | 13  | --         | --      |
|            | Ca(ICC2/ICC4958)SNP_01060 | 622  | C | T | 5   | 5   | --         | --      |
|            | Ca(ICC2/ICC4958)SNP_01061 | 1219 | A | G | 10  | 11  | --         | --      |
| CakTC17425 | Ca(ICC2/ICC4958)SNP_01062 | 298  | G | C | 3   | 6   | --         | --      |
| CakTC26859 | Ca(ICC2/ICC4958)SNP_01063 | 2738 | C | T | 6   | 6   | --         | --      |
| CakTC11450 | Ca(ICC2/ICC4958)SNP_01064 | 338  | C | T | 5   | 7   | --         | --      |
| CakTC09728 | Ca(ICC2/ICC4958)SNP_01065 | 935  | A | G | 24  | 20  | --         | TPR     |
| CakTC08925 | Ca(ICC2/ICC4958)SNP_01066 | 411  | A | G | 3   | 4   | --         | --      |
|            | Ca(ICC2/ICC4958)SNP_01067 | 523  | T | C | 3   | 6   | --         | --      |
| CakTC10668 | Ca(ICC2/ICC4958)SNP_01068 | 209  | T | C | 27  | 23  | --         | --      |
|            | Ca(ICC2/ICC4958)SNP_01069 | 228  | A | C | 25  | 24  | --         | --      |
| CakTC37679 | Ca(ICC2/ICC4958)SNP_01070 | 1375 | G | A | 4   | 9   | --         | --      |
| CakTC40886 | Ca(ICC2/ICC4958)SNP_01071 | 367  | T | A | 24  | 27  | --         | --      |
|            | Ca(ICC2/ICC4958)SNP_01072 | 687  | T | C | 22  | 31  | --         | --      |
| CakTC13258 | Ca(ICC2/ICC4958)SNP_01073 | 220  | C | T | 8   | 3   | --         | --      |
|            | Ca(ICC2/ICC4958)SNP_01074 | 286  | C | G | 7   | 3   | --         | --      |
| CakTC42665 | Ca(ICC2/ICC4958)SNP_01075 | 282  | C | T | 22  | 7   | --         | --      |
| CakTC41834 | Ca(ICC2/ICC4958)SNP_01076 | 283  | G | T | 6   | 11  | --         | --      |
| CakTC39043 | Ca(ICC2/ICC4958)SNP_01077 | 231  | A | G | 4   | 5   | --         | --      |
|            | Ca(ICC2/ICC4958)SNP_01078 | 415  | C | G | 3   | 4   | --         | --      |
| CakTC27433 | Ca(ICC2/ICC4958)SNP_01079 | 127  | C | T | 10  | 7   | --         | --      |
| CakTC31788 | Ca(ICC2/ICC4958)SNP_01080 | 1442 | C | T | 4   | 6   | --         | --      |
| CakTC40918 | Ca(ICC2/ICC4958)SNP_01081 | 55   | C | T | 22  | 38  | --         | --      |
|            | Ca(ICC2/ICC4958)SNP_01082 | 221  | A | T | 31  | 56  | --         | --      |
|            | Ca(ICC2/ICC4958)SNP_01083 | 617  | C | T | 6   | 20  | --         | --      |
| CakTC24866 | Ca(ICC2/ICC4958)SNP_01084 | 3196 | C | A | 20  | 3   | --         | ARF     |
| CakTC29878 | Ca(ICC2/ICC4958)SNP_01085 | 1775 | A | C | 17  | 5   | Shoot      | --      |
|            | Ca(ICC2/ICC4958)SNP_01086 | 2128 | G | A | 14  | 6   | Shoot      | --      |
| CakTC09260 | Ca(ICC2/ICC4958)SNP_01087 | 1816 | G | A | 3   | 3   | --         | --      |
| CakTC38529 | Ca(ICC2/ICC4958)SNP_01088 | 618  | C | T | 8   | 11  | --         | --      |
| CakTC31757 | Ca(ICC2/ICC4958)SNP_01089 | 90   | G | T | 3   | 3   | --         | --      |
| CakTC33350 | Ca(ICC2/ICC4958)SNP_01090 | 169  | C | A | 6   | 5   | --         | --      |
| CakTC34923 | Ca(ICC2/ICC4958)SNP_01091 | 255  | A | G | 3   | 3   | --         | --      |
| CakTC24647 | Ca(ICC2/ICC4958)SNP_01092 | 242  | A | G | 6   | 3   | --         | --      |
| CakTC24653 | Ca(ICC2/ICC4958)SNP_01093 | 48   | C | A | 4   | 6   | Young_pod  | --      |
|            | Ca(ICC2/ICC4958)SNP_01094 | 753  | C | T | 11  | 7   | Young_pod  | --      |
|            | Ca(ICC2/ICC4958)SNP_01095 | 950  | G | T | 12  | 10  | Young_pod  | --      |
|            | Ca(ICC2/ICC4958)SNP_01096 | 1583 | C | T | 4   | 3   | Young_pod  | --      |
| CakTC27565 | Ca(ICC2/ICC4958)SNP_01097 | 484  | C | A | 7   | 9   | --         | --      |
| CakTC18438 | Ca(ICC2/ICC4958)SNP_01098 | 209  | A | G | 3   | 3   | --         | --      |
| CakTC20149 | Ca(ICC2/ICC4958)SNP_01099 | 2171 | C | T | 7   | 5   | Flower bud | --      |
| CakTC11836 | Ca(ICC2/ICC4958)SNP_01100 | 111  | A | T | 6   | 4   | Young_pod  | --      |
| CakTC29986 | Ca(ICC2/ICC4958)SNP_01101 | 3769 | G | C | 4   | 17  | --         | --      |
| CakTC31319 | Ca(ICC2/ICC4958)SNP_01102 | 91   | G | A | 9   | 10  | --         | --      |
|            | Ca(ICC2/ICC4958)SNP_01103 | 93   | A | G | 9   | 11  | --         | --      |
| CakTC35416 | Ca(ICC2/ICC4958)SNP_01104 | 483  | G | A | 15  | 9   | --         | --      |

|            |                           |      |   |   |    |    |            |    |
|------------|---------------------------|------|---|---|----|----|------------|----|
|            | Ca(ICC2/ICC4958)SNP_01105 | 670  | T | C | 3  | 6  | --         | -- |
|            | Ca(ICC2/ICC4958)SNP_01106 | 779  | A | C | 13 | 17 | --         | -- |
|            | Ca(ICC2/ICC4958)SNP_01107 | 1250 | T | G | 16 | 10 | --         | -- |
|            | Ca(ICC2/ICC4958)SNP_01108 | 1351 | T | A | 11 | 9  | --         | -- |
|            | Ca(ICC2/ICC4958)SNP_01109 | 1952 | T | A | 14 | 9  | --         | -- |
|            | Ca(ICC2/ICC4958)SNP_01110 | 2912 | A | G | 8  | 9  | --         | -- |
| CakTC42465 | Ca(ICC2/ICC4958)SNP_01111 | 437  | G | A | 3  | 6  | --         | -- |
|            | Ca(ICC2/ICC4958)SNP_01112 | 438  | C | G | 3  | 6  | --         | -- |
| CakTC41859 | Ca(ICC2/ICC4958)SNP_01113 | 33   | C | A | 4  | 4  | --         | -- |
|            | Ca(ICC2/ICC4958)SNP_01114 | 153  | A | T | 12 | 9  | --         | -- |
|            | Ca(ICC2/ICC4958)SNP_01115 | 225  | A | G | 16 | 11 | --         | -- |
|            | Ca(ICC2/ICC4958)SNP_01116 | 256  | G | A | 56 | 11 | --         | -- |
| CakTC35508 | Ca(ICC2/ICC4958)SNP_01117 | 308  | T | C | 12 | 10 | --         | -- |
| CakTC26081 | Ca(ICC2/ICC4958)SNP_01118 | 2226 | G | A | 45 | 47 | --         | -- |
| CakTC25170 | Ca(ICC2/ICC4958)SNP_01119 | 275  | G | A | 10 | 13 | --         | -- |
|            | Ca(ICC2/ICC4958)SNP_01120 | 1182 | G | T | 10 | 9  | --         | -- |
|            | Ca(ICC2/ICC4958)SNP_01121 | 1192 | C | A | 11 | 9  | --         | -- |
|            | Ca(ICC2/ICC4958)SNP_01122 | 1236 | C | A | 10 | 8  | --         | -- |
| CakTC25457 | Ca(ICC2/ICC4958)SNP_01123 | 484  | T | C | 5  | 3  | --         | -- |
| CakTC32283 | Ca(ICC2/ICC4958)SNP_01124 | 1711 | C | T | 16 | 6  | Flower bud | -- |
| CakTC33135 | Ca(ICC2/ICC4958)SNP_01125 | 2061 | G | A | 27 | 10 | --         | -- |
| CakTC29816 | Ca(ICC2/ICC4958)SNP_01126 | 1068 | T | C | 3  | 11 | --         | -- |
|            | Ca(ICC2/ICC4958)SNP_01127 | 1320 | A | G | 3  | 6  | --         | -- |
|            | Ca(ICC2/ICC4958)SNP_01128 | 1428 | C | T | 3  | 6  | --         | -- |
| CakTC38046 | Ca(ICC2/ICC4958)SNP_01129 | 808  | T | C | 7  | 12 | --         | -- |
|            | Ca(ICC2/ICC4958)SNP_01130 | 813  | G | A | 7  | 12 | --         | -- |
|            | Ca(ICC2/ICC4958)SNP_01131 | 832  | G | A | 7  | 12 | --         | -- |
|            | Ca(ICC2/ICC4958)SNP_01132 | 1110 | C | G | 3  | 6  | --         | -- |
|            | Ca(ICC2/ICC4958)SNP_01133 | 1115 | T | C | 3  | 8  | --         | -- |
| CakTC28006 | Ca(ICC2/ICC4958)SNP_01134 | 945  | G | A | 11 | 14 | --         | -- |
| CakTC38940 | Ca(ICC2/ICC4958)SNP_01135 | 137  | A | T | 19 | 5  | --         | -- |
| CakTC31134 | Ca(ICC2/ICC4958)SNP_01136 | 375  | A | T | 11 | 3  | Shoot      | -- |
| CakTC38268 | Ca(ICC2/ICC4958)SNP_01137 | 751  | A | G | 10 | 25 | --         | -- |
| CakTC40441 | Ca(ICC2/ICC4958)SNP_01138 | 880  | C | G | 3  | 4  | --         | -- |
| CakTC13362 | Ca(ICC2/ICC4958)SNP_01139 | 1176 | T | C | 3  | 3  | --         | -- |
| CakTC40836 | Ca(ICC2/ICC4958)SNP_01140 | 212  | G | A | 5  | 4  | --         | -- |
|            | Ca(ICC2/ICC4958)SNP_01141 | 216  | T | G | 6  | 4  | --         | -- |
|            | Ca(ICC2/ICC4958)SNP_01142 | 291  | C | G | 6  | 3  | --         | -- |
|            | Ca(ICC2/ICC4958)SNP_01143 | 299  | C | T | 6  | 4  | --         | -- |
|            | Ca(ICC2/ICC4958)SNP_01144 | 513  | T | C | 5  | 7  | --         | -- |
|            | Ca(ICC2/ICC4958)SNP_01145 | 561  | G | T | 6  | 7  | --         | -- |
|            | Ca(ICC2/ICC4958)SNP_01146 | 873  | C | T | 9  | 6  | --         | -- |
|            | Ca(ICC2/ICC4958)SNP_01147 | 945  | G | A | 9  | 4  | --         | -- |
|            | Ca(ICC2/ICC4958)SNP_01148 | 1047 | C | A | 6  | 3  | --         | -- |
|            | Ca(ICC2/ICC4958)SNP_01149 | 1749 | T | A | 7  | 16 | --         | -- |
|            | Ca(ICC2/ICC4958)SNP_01150 | 1821 | A | G | 7  | 15 | --         | -- |
|            | Ca(ICC2/ICC4958)SNP_01151 | 1935 | G | T | 6  | 12 | --         | -- |
| CakTC40211 | Ca(ICC2/ICC4958)SNP_01152 | 1234 | C | T | 4  | 6  | --         | -- |
| CakTC40515 | Ca(ICC2/ICC4958)SNP_01153 | 38   | T | C | 4  | 3  | --         | -- |
| CakTC10689 | Ca(ICC2/ICC4958)SNP_01154 | 738  | T | A | 10 | 3  | --         | -- |
| CakTC41792 | Ca(ICC2/ICC4958)SNP_01155 | 2101 | A | G | 24 | 35 | --         | -- |
| CakTC32641 | Ca(ICC2/ICC4958)SNP_01156 | 1099 | C | T | 14 | 14 | --         | -- |
| CakTC22474 | Ca(ICC2/ICC4958)SNP_01157 | 244  | G | T | 4  | 3  | --         | -- |
| CakTC37404 | Ca(ICC2/ICC4958)SNP_01158 | 653  | C | G | 3  | 7  | Young pod  | -- |
| CakTC28478 | Ca(ICC2/ICC4958)SNP_01159 | 908  | C | T | 4  | 3  | --         | -- |
| CakTC36414 | Ca(ICC2/ICC4958)SNP_01160 | 302  | A | G | 3  | 3  | --         | -- |
| CakTC09680 | Ca(ICC2/ICC4958)SNP_01161 | 1081 | G | A | 8  | 4  | --         | -- |
| CakTC30076 | Ca(ICC2/ICC4958)SNP_01162 | 547  | G | T | 7  | 3  | --         | -- |
|            | Ca(ICC2/ICC4958)SNP_01163 | 556  | G | A | 8  | 3  | --         | -- |
| CakTC24546 | Ca(ICC2/ICC4958)SNP_01164 | 379  | T | A | 64 | 27 | --         | -- |
|            | Ca(ICC2/ICC4958)SNP_01165 | 668  | C | T | 84 | 4  | --         | -- |
| CakTC24713 | Ca(ICC2/ICC4958)SNP_01166 | 1760 | T | C | 6  | 6  | Shoot      | -- |
| CakTC22501 | Ca(ICC2/ICC4958)SNP_01167 | 873  | T | A | 5  | 4  | Flower bud | -- |
| CakTC25152 | Ca(ICC2/ICC4958)SNP_01168 | 4136 | A | G | 3  | 3  | --         | -- |
|            | Ca(ICC2/ICC4958)SNP_01169 | 4195 | C | T | 3  | 4  | --         | -- |
|            | Ca(ICC2/ICC4958)SNP_01170 | 4214 | A | G | 3  | 6  | --         | -- |
|            | Ca(ICC2/ICC4958)SNP_01171 | 4242 | G | A | 3  | 8  | --         | -- |
|            | Ca(ICC2/ICC4958)SNP_01172 | 4255 | C | A | 3  | 8  | --         | -- |
|            | Ca(ICC2/ICC4958)SNP_01173 | 4314 | G | A | 3  | 10 | --         | -- |
|            | Ca(ICC2/ICC4958)SNP_01174 | 4552 | T | G | 3  | 5  | --         | -- |
|            | Ca(ICC2/ICC4958)SNP_01175 | 4860 | T | C | 3  | 5  | --         | -- |
|            | Ca(ICC2/ICC4958)SNP_01176 | 5080 | G | T | 3  | 3  | --         | -- |
| CakTC14736 | Ca(ICC2/ICC4958)SNP_01177 | 1872 | G | A | 14 | 7  | --         | -- |
| CakTC10709 | Ca(ICC2/ICC4958)SNP_01178 | 853  | T | C | 3  | 3  | --         | -- |

|            |                           |      |   |   |    |     |            |     |
|------------|---------------------------|------|---|---|----|-----|------------|-----|
|            | Ca(ICC2/ICC4958)SNP_01179 | 905  | A | G | 3  | 3   | --         | --  |
|            | Ca(ICC2/ICC4958)SNP_01180 | 913  | T | C | 3  | 5   | --         | --  |
|            | Ca(ICC2/ICC4958)SNP_01181 | 926  | T | C | 3  | 4   | --         | --  |
|            | Ca(ICC2/ICC4958)SNP_01182 | 965  | T | C | 3  | 6   | --         | --  |
| CakTC42165 | Ca(ICC2/ICC4958)SNP_01183 | 6    | G | C | 3  | 4   | --         | --  |
|            | Ca(ICC2/ICC4958)SNP_01184 | 107  | C | A | 11 | 22  | --         | --  |
|            | Ca(ICC2/ICC4958)SNP_01185 | 1169 | T | C | 18 | 16  | --         | --  |
|            | Ca(ICC2/ICC4958)SNP_01186 | 1503 | C | G | 7  | 19  | --         | --  |
|            | Ca(ICC2/ICC4958)SNP_01187 | 1525 | G | T | 6  | 16  | --         | --  |
| CakTC33640 | Ca(ICC2/ICC4958)SNP_01188 | 1158 | G | A | 12 | 6   | --         | TPR |
| CakTC29618 | Ca(ICC2/ICC4958)SNP_01189 | 350  | A | C | 15 | 15  | --         | --  |
| CakTC33541 | Ca(ICC2/ICC4958)SNP_01190 | 623  | A | G | 4  | 8   | --         | --  |
| CakTC04485 | Ca(ICC2/ICC4958)SNP_01191 | 90   | G | A | 4  | 9   | --         | --  |
| CakTC24299 | Ca(ICC2/ICC4958)SNP_01192 | 948  | C | G | 13 | 12  | --         | --  |
| CakTC41663 | Ca(ICC2/ICC4958)SNP_01193 | 417  | A | G | 14 | 22  | --         | --  |
| CakTC40209 | Ca(ICC2/ICC4958)SNP_01194 | 793  | T | C | 56 | 93  | --         | --  |
| CakTC29105 | Ca(ICC2/ICC4958)SNP_01195 | 985  | G | T | 5  | 4   | --         | --  |
| CakTC36042 | Ca(ICC2/ICC4958)SNP_01196 | 93   | A | G | 9  | 7   | --         | --  |
|            | Ca(ICC2/ICC4958)SNP_01197 | 347  | A | G | 5  | 12  | --         | --  |
|            | Ca(ICC2/ICC4958)SNP_01198 | 494  | T | A | 7  | 13  | --         | --  |
|            | Ca(ICC2/ICC4958)SNP_01199 | 1118 | G | A | 12 | 22  | --         | --  |
|            | Ca(ICC2/ICC4958)SNP_01200 | 1754 | G | A | 10 | 13  | --         | --  |
|            | Ca(ICC2/ICC4958)SNP_01201 | 2105 | T | A | 4  | 9   | --         | --  |
|            | Ca(ICC2/ICC4958)SNP_01202 | 2310 | G | A | 9  | 14  | --         | --  |
| CakTC36103 | Ca(ICC2/ICC4958)SNP_01203 | 2092 | A | T | 7  | 4   | Root       | --  |
| CakTC40523 | Ca(ICC2/ICC4958)SNP_01204 | 482  | C | T | 25 | 11  | --         | --  |
|            | Ca(ICC2/ICC4958)SNP_01205 | 535  | C | T | 23 | 11  | --         | --  |
|            | Ca(ICC2/ICC4958)SNP_01206 | 552  | T | G | 20 | 10  | --         | --  |
|            | Ca(ICC2/ICC4958)SNP_01207 | 558  | A | G | 20 | 7   | --         | --  |
| CakTC31258 | Ca(ICC2/ICC4958)SNP_01208 | 783  | A | G | 9  | 24  | --         | --  |
|            | Ca(ICC2/ICC4958)SNP_01209 | 819  | G | A | 9  | 25  | --         | --  |
|            | Ca(ICC2/ICC4958)SNP_01210 | 852  | C | T | 12 | 23  | --         | --  |
|            | Ca(ICC2/ICC4958)SNP_01211 | 1566 | G | A | 16 | 25  | --         | --  |
|            | Ca(ICC2/ICC4958)SNP_01212 | 1671 | A | G | 15 | 22  | --         | --  |
| CakTC27485 | Ca(ICC2/ICC4958)SNP_01213 | 2939 | G | C | 10 | 5   | --         | --  |
| CakTC27566 | Ca(ICC2/ICC4958)SNP_01214 | 900  | C | A | 6  | 3   | Shoot      | --  |
| CakTC30512 | Ca(ICC2/ICC4958)SNP_01215 | 1370 | G | A | 3  | 15  | --         | --  |
| CakTC11234 | Ca(ICC2/ICC4958)SNP_01216 | 1010 | G | A | 13 | 13  | --         | --  |
|            | Ca(ICC2/ICC4958)SNP_01217 | 2020 | C | T | 8  | 15  | --         | --  |
| CakTC31291 | Ca(ICC2/ICC4958)SNP_01218 | 2175 | A | C | 13 | 28  | --         | --  |
| CakTC43053 | Ca(ICC2/ICC4958)SNP_01219 | 268  | G | T | 8  | 5   | --         | --  |
|            | Ca(ICC2/ICC4958)SNP_01220 | 634  | T | G | 5  | 3   | --         | --  |
|            | Ca(ICC2/ICC4958)SNP_01221 | 895  | T | C | 8  | 6   | --         | --  |
|            | Ca(ICC2/ICC4958)SNP_01222 | 1021 | C | T | 10 | 9   | --         | --  |
|            | Ca(ICC2/ICC4958)SNP_01223 | 1051 | A | C | 8  | 10  | --         | --  |
|            | Ca(ICC2/ICC4958)SNP_01224 | 1288 | A | G | 6  | 9   | --         | --  |
|            | Ca(ICC2/ICC4958)SNP_01225 | 1462 | G | A | 5  | 4   | --         | --  |
| CakTC32667 | Ca(ICC2/ICC4958)SNP_01226 | 504  | C | T | 3  | 3   | --         | --  |
| CakTC37717 | Ca(ICC2/ICC4958)SNP_01227 | 331  | G | T | 13 | 8   | --         | --  |
| CakTC39014 | Ca(ICC2/ICC4958)SNP_01228 | 364  | G | A | 3  | 5   | --         | --  |
| CakTC31748 | Ca(ICC2/ICC4958)SNP_01229 | 279  | G | A | 4  | 6   | Root       | --  |
|            | Ca(ICC2/ICC4958)SNP_01230 | 289  | A | G | 4  | 6   | Root       | --  |
|            | Ca(ICC2/ICC4958)SNP_01231 | 716  | C | T | 4  | 5   | Root       | --  |
| CakTC30393 | Ca(ICC2/ICC4958)SNP_01232 | 291  | C | T | 58 | 27  | --         | --  |
|            | Ca(ICC2/ICC4958)SNP_01233 | 1767 | G | C | 18 | 7   | --         | --  |
| CakTC41935 | Ca(ICC2/ICC4958)SNP_01234 | 563  | A | G | 4  | 3   | --         | --  |
| CakTC09568 | Ca(ICC2/ICC4958)SNP_01235 | 1008 | C | T | 3  | 3   | --         | --  |
|            | Ca(ICC2/ICC4958)SNP_01236 | 1018 | T | C | 3  | 3   | --         | --  |
|            | Ca(ICC2/ICC4958)SNP_01237 | 1028 | A | C | 3  | 3   | --         | --  |
|            | Ca(ICC2/ICC4958)SNP_01238 | 1047 | A | G | 3  | 3   | --         | --  |
|            | Ca(ICC2/ICC4958)SNP_01239 | 1071 | T | C | 3  | 3   | --         | --  |
|            | Ca(ICC2/ICC4958)SNP_01240 | 1091 | A | G | 3  | 3   | --         | --  |
| CakTC29809 | Ca(ICC2/ICC4958)SNP_01241 | 1132 | T | C | 19 | 8   | --         | --  |
|            | Ca(ICC2/ICC4958)SNP_01242 | 1196 | T | C | 17 | 7   | --         | --  |
|            | Ca(ICC2/ICC4958)SNP_01243 | 1210 | C | T | 18 | 7   | --         | --  |
|            | Ca(ICC2/ICC4958)SNP_01244 | 1244 | T | G | 17 | 7   | --         | --  |
| CakTC28031 | Ca(ICC2/ICC4958)SNP_01245 | 534  | T | C | 12 | 10  | --         | --  |
| CakTC43285 | Ca(ICC2/ICC4958)SNP_01246 | 1253 | C | T | 5  | 4   | --         | --  |
| CakTC39655 | Ca(ICC2/ICC4958)SNP_01247 | 406  | T | A | 4  | 9   | --         | --  |
| CakTC28839 | Ca(ICC2/ICC4958)SNP_01248 | 609  | C | T | 5  | 16  | --         | --  |
| CakTC28696 | Ca(ICC2/ICC4958)SNP_01249 | 1495 | G | A | 3  | 3   | Flower bud | --  |
| CakTC29249 | Ca(ICC2/ICC4958)SNP_01250 | 2416 | G | C | 3  | 5   | --         | --  |
| CakTC04081 | Ca(ICC2/ICC4958)SNP_01251 | 257  | T | C | 78 | 106 | --         | --  |
| CakTC32947 | Ca(ICC2/ICC4958)SNP_01252 | 1677 | T | C | 7  | 7   | --         | --  |

|            |                           |      |   |   |    |    |           |     |
|------------|---------------------------|------|---|---|----|----|-----------|-----|
| CakTC33824 | Ca(ICC2/ICC4958)SNP_01253 | 3189 | A | C | 3  | 6  | --        | --  |
| CakTC30712 | Ca(ICC2/ICC4958)SNP_01254 | 644  | G | A | 6  | 3  | --        | --  |
|            | Ca(ICC2/ICC4958)SNP_01255 | 653  | C | T | 6  | 3  | --        | --  |
|            | Ca(ICC2/ICC4958)SNP_01256 | 683  | C | A | 5  | 3  | --        | --  |
|            | Ca(ICC2/ICC4958)SNP_01257 | 701  | G | A | 6  | 3  | --        | --  |
| CakTC23401 | Ca(ICC2/ICC4958)SNP_01258 | 160  | G | A | 24 | 5  | --        | --  |
|            | Ca(ICC2/ICC4958)SNP_01259 | 172  | A | G | 25 | 5  | --        | --  |
| CakTC35642 | Ca(ICC2/ICC4958)SNP_01260 | 1779 | T | C | 12 | 6  | --        | --  |
|            | Ca(ICC2/ICC4958)SNP_01261 | 2473 | G | C | 7  | 17 | --        | --  |
| CakTC26597 | Ca(ICC2/ICC4958)SNP_01262 | 273  | G | T | 7  | 11 | --        | --  |
|            | Ca(ICC2/ICC4958)SNP_01263 | 459  | C | G | 6  | 12 | --        | --  |
|            | Ca(ICC2/ICC4958)SNP_01264 | 952  | A | T | 21 | 8  | --        | --  |
|            | Ca(ICC2/ICC4958)SNP_01265 | 2280 | C | T | 4  | 4  | --        | --  |
| CakTC24637 | Ca(ICC2/ICC4958)SNP_01266 | 1071 | T | C | 28 | 18 | --        | --  |
| CakTC31300 | Ca(ICC2/ICC4958)SNP_01267 | 1571 | C | A | 3  | 19 | Young_pod | --  |
| CakTC24759 | Ca(ICC2/ICC4958)SNP_01268 | 742  | C | T | 3  | 3  | --        | --  |
| CakTC30438 | Ca(ICC2/ICC4958)SNP_01269 | 207  | A | T | 5  | 3  | --        | --  |
|            | Ca(ICC2/ICC4958)SNP_01270 | 244  | A | T | 4  | 3  | --        | --  |
| CakTC10128 | Ca(ICC2/ICC4958)SNP_01271 | 1883 | A | G | 4  | 6  | --        | --  |
| CakTC11704 | Ca(ICC2/ICC4958)SNP_01272 | 123  | G | A | 4  | 5  | --        | --  |
|            | Ca(ICC2/ICC4958)SNP_01273 | 161  | A | T | 4  | 5  | --        | --  |
|            | Ca(ICC2/ICC4958)SNP_01274 | 163  | C | A | 4  | 5  | --        | --  |
|            | Ca(ICC2/ICC4958)SNP_01275 | 178  | T | G | 4  | 5  | --        | --  |
|            | Ca(ICC2/ICC4958)SNP_01276 | 207  | G | A | 4  | 5  | --        | --  |
|            | Ca(ICC2/ICC4958)SNP_01277 | 208  | C | T | 4  | 5  | --        | --  |
|            | Ca(ICC2/ICC4958)SNP_01278 | 249  | A | G | 4  | 4  | --        | --  |
|            | Ca(ICC2/ICC4958)SNP_01279 | 255  | C | G | 3  | 4  | --        | --  |
|            | Ca(ICC2/ICC4958)SNP_01280 | 275  | A | G | 4  | 4  | --        | --  |
|            | Ca(ICC2/ICC4958)SNP_01281 | 276  | G | A | 4  | 3  | --        | --  |
|            | Ca(ICC2/ICC4958)SNP_01282 | 304  | C | T | 4  | 4  | --        | --  |
| CakTC24444 | Ca(ICC2/ICC4958)SNP_01283 | 994  | C | T | 4  | 3  | --        | --  |
| CakTC31697 | Ca(ICC2/ICC4958)SNP_01284 | 303  | A | T | 6  | 25 | Young_pod | --  |
|            | Ca(ICC2/ICC4958)SNP_01285 | 305  | G | A | 6  | 25 | Young_pod | --  |
|            | Ca(ICC2/ICC4958)SNP_01286 | 328  | T | A | 6  | 26 | Young_pod | --  |
|            | Ca(ICC2/ICC4958)SNP_01287 | 332  | G | A | 5  | 26 | Young_pod | --  |
| CakTC29322 | Ca(ICC2/ICC4958)SNP_01288 | 388  | C | T | 4  | 3  | Young_pod | --  |
|            | Ca(ICC2/ICC4958)SNP_01289 | 568  | A | G | 4  | 3  | Young_pod | --  |
| CakTC40460 | Ca(ICC2/ICC4958)SNP_01290 | 140  | C | G | 7  | 5  | --        | PHD |
|            | Ca(ICC2/ICC4958)SNP_01291 | 2458 | T | G | 17 | 11 | --        | PHD |
| CakTC17397 | Ca(ICC2/ICC4958)SNP_01292 | 170  | C | T | 3  | 3  | --        | --  |
| CakTC32060 | Ca(ICC2/ICC4958)SNP_01293 | 625  | A | C | 4  | 7  | --        | --  |
|            | Ca(ICC2/ICC4958)SNP_01294 | 646  | A | G | 5  | 7  | --        | --  |
|            | Ca(ICC2/ICC4958)SNP_01295 | 822  | C | T | 9  | 4  | --        | --  |
|            | Ca(ICC2/ICC4958)SNP_01296 | 916  | C | G | 13 | 6  | --        | --  |
|            | Ca(ICC2/ICC4958)SNP_01297 | 1053 | G | A | 11 | 4  | --        | --  |
|            | Ca(ICC2/ICC4958)SNP_01298 | 1130 | A | G | 12 | 4  | --        | --  |
| CakTC38992 | Ca(ICC2/ICC4958)SNP_01299 | 37   | C | T | 22 | 12 | --        | --  |
|            | Ca(ICC2/ICC4958)SNP_01300 | 83   | T | C | 33 | 13 | --        | --  |
|            | Ca(ICC2/ICC4958)SNP_01301 | 91   | G | A | 34 | 15 | --        | --  |
|            | Ca(ICC2/ICC4958)SNP_01302 | 868  | G | A | 41 | 27 | --        | --  |
| CakTC39104 | Ca(ICC2/ICC4958)SNP_01303 | 461  | A | G | 19 | 17 | --        | --  |
|            | Ca(ICC2/ICC4958)SNP_01304 | 560  | C | G | 17 | 10 | --        | --  |
|            | Ca(ICC2/ICC4958)SNP_01305 | 875  | T | C | 14 | 12 | --        | --  |
|            | Ca(ICC2/ICC4958)SNP_01306 | 1031 | T | C | 13 | 16 | --        | --  |
|            | Ca(ICC2/ICC4958)SNP_01307 | 1037 | T | G | 13 | 16 | --        | --  |
| CakTC29978 | Ca(ICC2/ICC4958)SNP_01308 | 4518 | A | C | 3  | 5  | --        | --  |
| CakTC23813 | Ca(ICC2/ICC4958)SNP_01309 | 633  | T | A | 12 | 3  | --        | --  |
|            | Ca(ICC2/ICC4958)SNP_01310 | 866  | A | G | 7  | 3  | --        | --  |
|            | Ca(ICC2/ICC4958)SNP_01311 | 1117 | T | A | 5  | 5  | --        | --  |
|            | Ca(ICC2/ICC4958)SNP_01312 | 1126 | C | T | 5  | 5  | --        | --  |
| CakTC42593 | Ca(ICC2/ICC4958)SNP_01313 | 1486 | A | G | 19 | 17 | --        | --  |
| CakTC24197 | Ca(ICC2/ICC4958)SNP_01314 | 622  | C | T | 32 | 14 | --        | --  |
|            | Ca(ICC2/ICC4958)SNP_01315 | 830  | T | C | 63 | 18 | --        | --  |
|            | Ca(ICC2/ICC4958)SNP_01316 | 867  | A | G | 55 | 22 | --        | --  |
| CakTC39862 | Ca(ICC2/ICC4958)SNP_01317 | 885  | T | C | 7  | 15 | --        | --  |
| CakTC31469 | Ca(ICC2/ICC4958)SNP_01318 | 336  | G | A | 5  | 3  | --        | --  |
|            | Ca(ICC2/ICC4958)SNP_01319 | 405  | A | G | 5  | 6  | --        | --  |
| CakTC41155 | Ca(ICC2/ICC4958)SNP_01320 | 2398 | A | T | 7  | 8  | --        | --  |
| CakTC30048 | Ca(ICC2/ICC4958)SNP_01321 | 519  | T | C | 9  | 7  | --        | --  |
|            | Ca(ICC2/ICC4958)SNP_01322 | 993  | A | G | 19 | 10 | --        | --  |
|            | Ca(ICC2/ICC4958)SNP_01323 | 1647 | A | T | 12 | 11 | --        | --  |
| CakTC30279 | Ca(ICC2/ICC4958)SNP_01324 | 213  | C | T | 5  | 6  | --        | --  |
|            | Ca(ICC2/ICC4958)SNP_01325 | 327  | T | G | 6  | 12 | --        | --  |
|            | Ca(ICC2/ICC4958)SNP_01326 | 1253 | A | G | 9  | 10 | --        | --  |

|            |                           |      |   |   |     |     |            |      |
|------------|---------------------------|------|---|---|-----|-----|------------|------|
| CakTC12043 | Ca(ICC2/ICC4958)SNP_01327 | 50   | C | G | 3   | 8   | Flower bud | --   |
|            | Ca(ICC2/ICC4958)SNP_01328 | 56   | A | G | 3   | 8   | Flower bud | --   |
|            | Ca(ICC2/ICC4958)SNP_01329 | 86   | G | T | 3   | 8   | Flower bud | --   |
|            | Ca(ICC2/ICC4958)SNP_01330 | 96   | A | T | 3   | 8   | Flower bud | --   |
|            | Ca(ICC2/ICC4958)SNP_01331 | 174  | C | T | 4   | 8   | Flower bud | --   |
|            | Ca(ICC2/ICC4958)SNP_01332 | 192  | C | T | 4   | 8   | Flower bud | --   |
|            | Ca(ICC2/ICC4958)SNP_01333 | 193  | T | C | 3   | 8   | Flower bud | --   |
|            | Ca(ICC2/ICC4958)SNP_01334 | 229  | A | G | 4   | 7   | Flower bud | --   |
|            | Ca(ICC2/ICC4958)SNP_01335 | 235  | G | A | 4   | 8   | Flower bud | --   |
|            | Ca(ICC2/ICC4958)SNP_01336 | 264  | T | G | 5   | 7   | Flower bud | --   |
|            | Ca(ICC2/ICC4958)SNP_01337 | 265  | G | A | 5   | 6   | Flower bud | --   |
|            | Ca(ICC2/ICC4958)SNP_01338 | 278  | T | G | 5   | 8   | Flower bud | --   |
|            | Ca(ICC2/ICC4958)SNP_01339 | 346  | C | T | 3   | 5   | Flower bud | --   |
| CakTC39821 | Ca(ICC2/ICC4958)SNP_01340 | 1167 | G | A | 4   | 11  | --         | --   |
| CakTC38978 | Ca(ICC2/ICC4958)SNP_01341 | 937  | A | G | 34  | 55  | --         | --   |
| CakTC29545 | Ca(ICC2/ICC4958)SNP_01342 | 2163 | T | A | 3   | 4   | --         | --   |
| CakTC26854 | Ca(ICC2/ICC4958)SNP_01343 | 312  | A | G | 17  | 14  | --         | --   |
|            | Ca(ICC2/ICC4958)SNP_01344 | 372  | A | G | 25  | 16  | --         | --   |
|            | Ca(ICC2/ICC4958)SNP_01345 | 399  | A | G | 23  | 16  | --         | --   |
|            | Ca(ICC2/ICC4958)SNP_01346 | 429  | T | C | 24  | 14  | --         | --   |
|            | Ca(ICC2/ICC4958)SNP_01347 | 612  | G | A | 15  | 15  | --         | --   |
|            | Ca(ICC2/ICC4958)SNP_01348 | 717  | A | G | 18  | 7   | --         | --   |
|            | Ca(ICC2/ICC4958)SNP_01349 | 872  | C | G | 15  | 6   | --         | --   |
|            | Ca(ICC2/ICC4958)SNP_01350 | 953  | C | T | 24  | 7   | --         | --   |
|            | Ca(ICC2/ICC4958)SNP_01351 | 1065 | C | T | 25  | 11  | --         | --   |
|            | Ca(ICC2/ICC4958)SNP_01352 | 1113 | G | A | 27  | 13  | --         | --   |
|            | Ca(ICC2/ICC4958)SNP_01353 | 1272 | T | A | 19  | 9   | --         | --   |
|            | Ca(ICC2/ICC4958)SNP_01354 | 1283 | C | T | 22  | 10  | --         | --   |
|            | Ca(ICC2/ICC4958)SNP_01355 | 1532 | A | C | 19  | 8   | --         | --   |
|            | Ca(ICC2/ICC4958)SNP_01356 | 1650 | G | C | 17  | 11  | --         | --   |
|            | Ca(ICC2/ICC4958)SNP_01357 | 2136 | T | C | 11  | 16  | --         | --   |
|            | Ca(ICC2/ICC4958)SNP_01358 | 2742 | G | A | 20  | 8   | --         | --   |
|            | Ca(ICC2/ICC4958)SNP_01359 | 2797 | T | G | 18  | 6   | --         | --   |
|            | Ca(ICC2/ICC4958)SNP_01360 | 2816 | A | T | 19  | 6   | --         | --   |
| CakTC24618 | Ca(ICC2/ICC4958)SNP_01361 | 1725 | G | A | 16  | 6   | --         | --   |
|            | Ca(ICC2/ICC4958)SNP_01362 | 2413 | A | G | 7   | 9   | --         | --   |
|            | Ca(ICC2/ICC4958)SNP_01363 | 3874 | C | T | 5   | 8   | --         | --   |
|            | Ca(ICC2/ICC4958)SNP_01364 | 3939 | A | G | 6   | 9   | --         | --   |
| CakTC28203 | Ca(ICC2/ICC4958)SNP_01365 | 380  | G | A | 4   | 3   | --         | --   |
|            | Ca(ICC2/ICC4958)SNP_01366 | 616  | A | G | 31  | 3   | --         | --   |
|            | Ca(ICC2/ICC4958)SNP_01367 | 659  | T | G | 29  | 3   | --         | --   |
|            | Ca(ICC2/ICC4958)SNP_01368 | 897  | A | G | 29  | 3   | --         | --   |
|            | Ca(ICC2/ICC4958)SNP_01369 | 989  | A | C | 3   | 4   | --         | --   |
|            | Ca(ICC2/ICC4958)SNP_01370 | 1181 | C | T | 5   | 7   | --         | --   |
|            | Ca(ICC2/ICC4958)SNP_01371 | 1450 | T | C | 7   | 12  | --         | --   |
|            | Ca(ICC2/ICC4958)SNP_01372 | 1506 | A | G | 6   | 12  | --         | --   |
|            | Ca(ICC2/ICC4958)SNP_01373 | 1515 | A | G | 7   | 11  | --         | --   |
|            | Ca(ICC2/ICC4958)SNP_01374 | 1520 | G | C | 8   | 11  | --         | --   |
|            | Ca(ICC2/ICC4958)SNP_01375 | 1525 | T | C | 7   | 11  | --         | --   |
| CakTC27528 | Ca(ICC2/ICC4958)SNP_01376 | 1343 | C | T | 13  | 5   | --         | TUB  |
| CakTC29484 | Ca(ICC2/ICC4958)SNP_01377 | 677  | G | T | 8   | 4   | --         | --   |
| CakTC37642 | Ca(ICC2/ICC4958)SNP_01378 | 394  | C | A | 6   | 4   | --         | --   |
| CakTC40874 | Ca(ICC2/ICC4958)SNP_01379 | 447  | T | C | 7   | 5   | --         | WRKY |
| CakTC13752 | Ca(ICC2/ICC4958)SNP_01380 | 3298 | G | A | 6   | 3   | --         | --   |
| CakTC24946 | Ca(ICC2/ICC4958)SNP_01381 | 682  | T | C | 13  | 11  | --         | --   |
| CakTC31945 | Ca(ICC2/ICC4958)SNP_01382 | 1596 | C | T | 13  | 12  | --         | C3H  |
| CakTC25228 | Ca(ICC2/ICC4958)SNP_01383 | 212  | C | T | 58  | 23  | --         | --   |
|            | Ca(ICC2/ICC4958)SNP_01384 | 241  | A | T | 82  | 69  | --         | --   |
|            | Ca(ICC2/ICC4958)SNP_01385 | 357  | T | C | 124 | 100 | --         | --   |
|            | Ca(ICC2/ICC4958)SNP_01386 | 520  | C | T | 151 | 112 | --         | --   |
|            | Ca(ICC2/ICC4958)SNP_01387 | 574  | C | A | 166 | 121 | --         | --   |
|            | Ca(ICC2/ICC4958)SNP_01388 | 580  | C | T | 161 | 122 | --         | --   |
|            | Ca(ICC2/ICC4958)SNP_01389 | 655  | A | C | 122 | 77  | --         | --   |
|            | Ca(ICC2/ICC4958)SNP_01390 | 676  | C | G | 105 | 80  | --         | --   |
|            | Ca(ICC2/ICC4958)SNP_01391 | 730  | A | C | 98  | 70  | --         | --   |
| CakTC12141 | Ca(ICC2/ICC4958)SNP_01392 | 312  | C | T | 3   | 3   | --         | --   |
| CakTC23831 | Ca(ICC2/ICC4958)SNP_01393 | 1387 | T | C | 3   | 6   | --         | --   |
|            | Ca(ICC2/ICC4958)SNP_01394 | 1390 | T | C | 3   | 6   | --         | --   |
| CakTC09957 | Ca(ICC2/ICC4958)SNP_01395 | 1045 | C | G | 3   | 6   | --         | --   |
|            | Ca(ICC2/ICC4958)SNP_01396 | 1259 | C | T | 4   | 4   | --         | --   |
| CakTC27308 | Ca(ICC2/ICC4958)SNP_01397 | 736  | A | T | 3   | 7   | --         | --   |
| CakTC30300 | Ca(ICC2/ICC4958)SNP_01398 | 374  | T | C | 12  | 10  | --         | --   |
| CakTC36220 | Ca(ICC2/ICC4958)SNP_01399 | 1196 | T | C | 20  | 3   | --         | --   |
| CakTC26491 | Ca(ICC2/ICC4958)SNP_01400 | 227  | T | C | 7   | 11  | --         | --   |

|            |                           |      |   |   |    |    |       |            |
|------------|---------------------------|------|---|---|----|----|-------|------------|
| CakTC26175 | Ca(ICC2/ICC4958)SNP_01401 | 689  | G | T | 6  | 8  | --    | --         |
|            | Ca(ICC2/ICC4958)SNP_01402 | 701  | C | T | 6  | 7  | --    | --         |
|            | Ca(ICC2/ICC4958)SNP_01403 | 734  | A | G | 6  | 6  | --    | --         |
|            | Ca(ICC2/ICC4958)SNP_01404 | 782  | T | C | 6  | 10 | --    | --         |
|            | Ca(ICC2/ICC4958)SNP_01405 | 1170 | A | G | 4  | 6  | --    | --         |
|            | Ca(ICC2/ICC4958)SNP_01406 | 1172 | G | C | 4  | 6  | --    | --         |
| CakTC41501 | Ca(ICC2/ICC4958)SNP_01407 | 155  | A | G | 4  | 5  | --    | --         |
|            | Ca(ICC2/ICC4958)SNP_01408 | 491  | C | G | 7  | 4  | --    | --         |
| CakTC10038 | Ca(ICC2/ICC4958)SNP_01409 | 915  | T | C | 3  | 6  | --    | --         |
|            | Ca(ICC2/ICC4958)SNP_01410 | 1004 | C | T | 4  | 7  | --    | --         |
|            | Ca(ICC2/ICC4958)SNP_01411 | 1285 | T | G | 4  | 3  | --    | --         |
| CakTC36304 | Ca(ICC2/ICC4958)SNP_01412 | 8    | C | T | 3  | 4  | --    | --         |
|            | Ca(ICC2/ICC4958)SNP_01413 | 1577 | C | T | 12 | 23 | --    | --         |
|            | Ca(ICC2/ICC4958)SNP_01414 | 1715 | G | A | 9  | 27 | --    | --         |
|            | Ca(ICC2/ICC4958)SNP_01415 | 2165 | T | C | 13 | 13 | --    | --         |
|            | Ca(ICC2/ICC4958)SNP_01416 | 2273 | G | A | 10 | 14 | --    | --         |
| CakTC22348 | Ca(ICC2/ICC4958)SNP_01417 | 2503 | G | C | 11 | 7  | --    | FHA        |
| CakTC36433 | Ca(ICC2/ICC4958)SNP_01418 | 1052 | T | C | 3  | 14 | --    | --         |
|            | Ca(ICC2/ICC4958)SNP_01419 | 2347 | A | G | 10 | 7  | --    | --         |
|            | Ca(ICC2/ICC4958)SNP_01420 | 2440 | T | C | 11 | 8  | --    | --         |
|            | Ca(ICC2/ICC4958)SNP_01421 | 2512 | A | G | 11 | 6  | --    | --         |
|            | Ca(ICC2/ICC4958)SNP_01422 | 2617 | C | T | 9  | 7  | --    | --         |
|            | Ca(ICC2/ICC4958)SNP_01423 | 2621 | C | A | 8  | 7  | --    | --         |
|            | Ca(ICC2/ICC4958)SNP_01424 | 2824 | C | T | 7  | 7  | --    | --         |
| CakTC39912 | Ca(ICC2/ICC4958)SNP_01425 | 762  | C | T | 6  | 9  | --    | --         |
| CakTC41296 | Ca(ICC2/ICC4958)SNP_01426 | 905  | C | T | 4  | 7  | --    | --         |
| CakTC31552 | Ca(ICC2/ICC4958)SNP_01427 | 754  | T | C | 4  | 5  | --    | Alfin-like |
| CakTC25885 | Ca(ICC2/ICC4958)SNP_01428 | 212  | A | G | 3  | 6  | --    | --         |
| CakTC39832 | Ca(ICC2/ICC4958)SNP_01429 | 288  | T | C | 5  | 22 | --    | --         |
|            | Ca(ICC2/ICC4958)SNP_01430 | 657  | T | C | 5  | 7  | --    | --         |
|            | Ca(ICC2/ICC4958)SNP_01431 | 1302 | C | T | 9  | 15 | --    | --         |
| CakTC10459 | Ca(ICC2/ICC4958)SNP_01432 | 454  | C | T | 4  | 4  | --    | --         |
| CakTC34249 | Ca(ICC2/ICC4958)SNP_01433 | 74   | T | C | 4  | 7  | --    | --         |
| CakTC36164 | Ca(ICC2/ICC4958)SNP_01434 | 197  | A | G | 3  | 48 | --    | --         |
| CakTC42021 | Ca(ICC2/ICC4958)SNP_01435 | 339  | A | T | 14 | 8  | --    | --         |
| CakTC09156 | Ca(ICC2/ICC4958)SNP_01436 | 550  | A | T | 3  | 5  | --    | --         |
|            | Ca(ICC2/ICC4958)SNP_01437 | 553  | C | T | 3  | 5  | --    | --         |
|            | Ca(ICC2/ICC4958)SNP_01438 | 562  | A | G | 3  | 5  | --    | --         |
|            | Ca(ICC2/ICC4958)SNP_01439 | 616  | A | T | 4  | 5  | --    | --         |
|            | Ca(ICC2/ICC4958)SNP_01440 | 625  | A | C | 4  | 5  | --    | --         |
|            | Ca(ICC2/ICC4958)SNP_01441 | 664  | A | G | 4  | 5  | --    | --         |
|            | Ca(ICC2/ICC4958)SNP_01442 | 667  | G | A | 3  | 5  | --    | --         |
|            | Ca(ICC2/ICC4958)SNP_01443 | 675  | G | T | 4  | 5  | --    | --         |
|            | Ca(ICC2/ICC4958)SNP_01444 | 679  | A | T | 4  | 5  | --    | --         |
|            | Ca(ICC2/ICC4958)SNP_01445 | 690  | G | C | 4  | 5  | --    | --         |
|            | Ca(ICC2/ICC4958)SNP_01446 | 696  | G | A | 4  | 5  | --    | --         |
| CakTC30708 | Ca(ICC2/ICC4958)SNP_01447 | 1635 | G | A | 4  | 12 | --    | --         |
| CakTC22597 | Ca(ICC2/ICC4958)SNP_01448 | 1941 | T | G | 7  | 3  | --    | --         |
| CakTC28703 | Ca(ICC2/ICC4958)SNP_01449 | 1014 | A | T | 5  | 6  | Shoot | --         |
|            | Ca(ICC2/ICC4958)SNP_01450 | 1026 | G | A | 6  | 6  | Shoot | --         |
| CakTC07671 | Ca(ICC2/ICC4958)SNP_01451 | 336  | A | G | 5  | 3  | --    | --         |
| CakTC31893 | Ca(ICC2/ICC4958)SNP_01452 | 281  | C | T | 24 | 49 | --    | --         |
|            | Ca(ICC2/ICC4958)SNP_01453 | 289  | C | T | 24 | 49 | --    | --         |
|            | Ca(ICC2/ICC4958)SNP_01454 | 418  | C | A | 25 | 45 | --    | --         |
|            | Ca(ICC2/ICC4958)SNP_01455 | 470  | T | G | 26 | 47 | --    | --         |
|            | Ca(ICC2/ICC4958)SNP_01456 | 522  | G | T | 27 | 46 | --    | --         |
|            | Ca(ICC2/ICC4958)SNP_01457 | 1113 | T | C | 15 | 27 | --    | --         |
|            | Ca(ICC2/ICC4958)SNP_01458 | 1167 | C | T | 14 | 20 | --    | --         |
|            | Ca(ICC2/ICC4958)SNP_01459 | 1367 | A | T | 9  | 6  | --    | --         |
|            | Ca(ICC2/ICC4958)SNP_01460 | 1372 | C | T | 9  | 6  | --    | --         |
| CakTC37883 | Ca(ICC2/ICC4958)SNP_01461 | 245  | A | C | 6  | 4  | --    | --         |
| CakTC42690 | Ca(ICC2/ICC4958)SNP_01462 | 761  | C | T | 29 | 22 | --    | --         |
|            | Ca(ICC2/ICC4958)SNP_01463 | 822  | C | T | 10 | 10 | --    | --         |
|            | Ca(ICC2/ICC4958)SNP_01464 | 854  | G | C | 6  | 3  | --    | --         |
| CakTC23525 | Ca(ICC2/ICC4958)SNP_01465 | 535  | T | A | 16 | 4  | --    | --         |
| CakTC39376 | Ca(ICC2/ICC4958)SNP_01466 | 541  | T | G | 3  | 13 | --    | --         |
| CakTC33087 | Ca(ICC2/ICC4958)SNP_01467 | 171  | T | C | 9  | 8  | --    | --         |
|            | Ca(ICC2/ICC4958)SNP_01468 | 288  | G | A | 10 | 8  | --    | --         |
|            | Ca(ICC2/ICC4958)SNP_01469 | 306  | C | T | 10 | 8  | --    | --         |
|            | Ca(ICC2/ICC4958)SNP_01470 | 445  | C | G | 8  | 13 | --    | --         |
|            | Ca(ICC2/ICC4958)SNP_01471 | 1033 | T | C | 6  | 20 | --    | --         |
|            | Ca(ICC2/ICC4958)SNP_01472 | 1163 | C | A | 13 | 22 | --    | --         |
|            | Ca(ICC2/ICC4958)SNP_01473 | 2214 | A | G | 13 | 17 | --    | --         |
| CakTC37769 | Ca(ICC2/ICC4958)SNP_01474 | 45   | C | G | 7  | 7  | --    | --         |

|            |                           |      |   |   |    |     |           |          |
|------------|---------------------------|------|---|---|----|-----|-----------|----------|
|            | Ca(ICC2/ICC4958)SNP_01475 | 100  | C | T | 25 | 36  | --        | --       |
| CakTC40851 | Ca(ICC2/ICC4958)SNP_01476 | 678  | T | A | 20 | 38  | --        | --       |
|            | Ca(ICC2/ICC4958)SNP_01477 | 772  | G | C | 7  | 24  | --        | --       |
| CakTC32010 | Ca(ICC2/ICC4958)SNP_01478 | 1019 | A | T | 27 | 21  | --        | --       |
|            | Ca(ICC2/ICC4958)SNP_01479 | 2360 | C | T | 22 | 21  | --        | --       |
|            | Ca(ICC2/ICC4958)SNP_01480 | 2405 | T | C | 22 | 25  | --        | --       |
|            | Ca(ICC2/ICC4958)SNP_01481 | 2483 | T | A | 30 | 29  | --        | --       |
|            | Ca(ICC2/ICC4958)SNP_01482 | 3266 | T | A | 10 | 34  | --        | --       |
| CakTC26058 | Ca(ICC2/ICC4958)SNP_01483 | 32   | A | G | 11 | 5   | --        | --       |
|            | Ca(ICC2/ICC4958)SNP_01484 | 323  | T | C | 18 | 9   | --        | --       |
|            | Ca(ICC2/ICC4958)SNP_01485 | 351  | A | G | 19 | 11  | --        | --       |
|            | Ca(ICC2/ICC4958)SNP_01486 | 354  | C | T | 20 | 11  | --        | --       |
| CakTC25927 | Ca(ICC2/ICC4958)SNP_01487 | 744  | C | T | 16 | 17  | --        | --       |
|            | Ca(ICC2/ICC4958)SNP_01488 | 747  | C | T | 15 | 17  | --        | --       |
|            | Ca(ICC2/ICC4958)SNP_01489 | 780  | C | T | 19 | 18  | --        | --       |
|            | Ca(ICC2/ICC4958)SNP_01490 | 939  | C | T | 27 | 13  | --        | --       |
|            | Ca(ICC2/ICC4958)SNP_01491 | 1457 | T | C | 41 | 23  | --        | --       |
| CakTC32784 | Ca(ICC2/ICC4958)SNP_01492 | 1629 | G | C | 7  | 16  | --        | ARF      |
|            | Ca(ICC2/ICC4958)SNP_01493 | 1710 | G | A | 8  | 20  | --        | ARF      |
| CakTC13631 | Ca(ICC2/ICC4958)SNP_01494 | 712  | A | G | 5  | 7   | --        | --       |
|            | Ca(ICC2/ICC4958)SNP_01495 | 1424 | G | C | 10 | 21  | --        | --       |
| CakTC26836 | Ca(ICC2/ICC4958)SNP_01496 | 1486 | G | A | 29 | 16  | --        | --       |
|            | Ca(ICC2/ICC4958)SNP_01497 | 1747 | C | T | 7  | 3   | --        | --       |
| CakTC09908 | Ca(ICC2/ICC4958)SNP_01498 | 85   | T | C | 3  | 3   | --        | --       |
|            | Ca(ICC2/ICC4958)SNP_01499 | 171  | C | G | 6  | 6   | --        | --       |
| CakTC38843 | Ca(ICC2/ICC4958)SNP_01500 | 285  | C | T | 8  | 5   | --        | C3H      |
| CakTC42270 | Ca(ICC2/ICC4958)SNP_01501 | 24   | A | C | 5  | 4   | --        | --       |
|            | Ca(ICC2/ICC4958)SNP_01502 | 50   | G | T | 7  | 9   | --        | --       |
|            | Ca(ICC2/ICC4958)SNP_01503 | 71   | C | T | 8  | 15  | --        | --       |
|            | Ca(ICC2/ICC4958)SNP_01504 | 111  | T | G | 8  | 17  | --        | --       |
| CakTC10681 | Ca(ICC2/ICC4958)SNP_01505 | 880  | C | T | 10 | 8   | --        | BBR/BPC  |
| CakTC27526 | Ca(ICC2/ICC4958)SNP_01506 | 2435 | T | G | 13 | 13  | Young_pod | PHD      |
| CakTC34844 | Ca(ICC2/ICC4958)SNP_01507 | 2765 | T | C | 8  | 6   | --        | --       |
|            | Ca(ICC2/ICC4958)SNP_01508 | 3096 | A | G | 14 | 11  | --        | --       |
| CakTC24550 | Ca(ICC2/ICC4958)SNP_01509 | 318  | C | T | 9  | 4   | --        | --       |
|            | Ca(ICC2/ICC4958)SNP_01510 | 1877 | A | G | 13 | 3   | --        | --       |
| CakTC32002 | Ca(ICC2/ICC4958)SNP_01511 | 193  | T | G | 3  | 5   | --        | SNF2     |
| CakTC30255 | Ca(ICC2/ICC4958)SNP_01512 | 1402 | G | A | 11 | 4   | --        | --       |
| CakTC02614 | Ca(ICC2/ICC4958)SNP_01513 | 2252 | A | G | 3  | 5   | --        | --       |
| CakTC36366 | Ca(ICC2/ICC4958)SNP_01514 | 209  | C | A | 6  | 4   | --        | --       |
|            | Ca(ICC2/ICC4958)SNP_01515 | 251  | G | A | 7  | 4   | --        | --       |
|            | Ca(ICC2/ICC4958)SNP_01516 | 521  | T | G | 3  | 3   | --        | --       |
| CakTC31459 | Ca(ICC2/ICC4958)SNP_01517 | 105  | A | G | 5  | 6   | Root      | --       |
|            | Ca(ICC2/ICC4958)SNP_01518 | 174  | C | G | 7  | 5   | Root      | --       |
|            | Ca(ICC2/ICC4958)SNP_01519 | 203  | C | T | 7  | 5   | Root      | --       |
|            | Ca(ICC2/ICC4958)SNP_01520 | 270  | G | A | 6  | 5   | Root      | --       |
|            | Ca(ICC2/ICC4958)SNP_01521 | 278  | G | A | 6  | 5   | Root      | --       |
|            | Ca(ICC2/ICC4958)SNP_01522 | 289  | A | G | 7  | 5   | Root      | --       |
|            | Ca(ICC2/ICC4958)SNP_01523 | 311  | G | A | 7  | 5   | Root      | --       |
|            | Ca(ICC2/ICC4958)SNP_01524 | 315  | A | G | 7  | 5   | Root      | --       |
| CakTC25334 | Ca(ICC2/ICC4958)SNP_01525 | 509  | T | C | 69 | 105 | --        | --       |
| CakTC34659 | Ca(ICC2/ICC4958)SNP_01526 | 2716 | A | G | 12 | 10  | --        | --       |
|            | Ca(ICC2/ICC4958)SNP_01527 | 3097 | T | C | 10 | 11  | --        | --       |
|            | Ca(ICC2/ICC4958)SNP_01528 | 3469 | C | T | 14 | 9   | --        | --       |
|            | Ca(ICC2/ICC4958)SNP_01529 | 6116 | A | C | 6  | 14  | --        | --       |
| CakTC26143 | Ca(ICC2/ICC4958)SNP_01530 | 2645 | A | G | 33 | 34  | --        | --       |
|            | Ca(ICC2/ICC4958)SNP_01531 | 3072 | C | T | 39 | 17  | --        | --       |
|            | Ca(ICC2/ICC4958)SNP_01532 | 6096 | A | G | 5  | 3   | --        | --       |
|            | Ca(ICC2/ICC4958)SNP_01533 | 6181 | G | A | 3  | 3   | --        | --       |
| CakTC38869 | Ca(ICC2/ICC4958)SNP_01534 | 95   | A | G | 12 | 7   | --        | Trihelix |
| CakTC40174 | Ca(ICC2/ICC4958)SNP_01535 | 45   | T | A | 5  | 3   | --        | --       |
|            | Ca(ICC2/ICC4958)SNP_01536 | 66   | T | G | 5  | 4   | --        | --       |
|            | Ca(ICC2/ICC4958)SNP_01537 | 71   | G | C | 6  | 5   | --        | --       |
|            | Ca(ICC2/ICC4958)SNP_01538 | 101  | C | A | 6  | 5   | --        | --       |
|            | Ca(ICC2/ICC4958)SNP_01539 | 111  | A | G | 6  | 5   | --        | --       |
|            | Ca(ICC2/ICC4958)SNP_01540 | 114  | G | C | 5  | 5   | --        | --       |
|            | Ca(ICC2/ICC4958)SNP_01541 | 311  | C | T | 7  | 9   | --        | --       |
|            | Ca(ICC2/ICC4958)SNP_01542 | 983  | C | T | 12 | 12  | --        | --       |
| CakTC38413 | Ca(ICC2/ICC4958)SNP_01543 | 1161 | T | A | 4  | 4   | --        | --       |
| CakTC40923 | Ca(ICC2/ICC4958)SNP_01544 | 513  | C | A | 6  | 7   | --        | --       |
| CakTC30152 | Ca(ICC2/ICC4958)SNP_01545 | 443  | A | G | 11 | 13  | --        | --       |
| CakTC07013 | Ca(ICC2/ICC4958)SNP_01546 | 185  | C | G | 4  | 6   | --        | --       |
| CakTC36706 | Ca(ICC2/ICC4958)SNP_01547 | 231  | A | T | 3  | 3   | --        | --       |
| CakTC34493 | Ca(ICC2/ICC4958)SNP_01548 | 1020 | G | A | 5  | 3   | --        | --       |

|            |                           |      |   |   |     |     |            |      |
|------------|---------------------------|------|---|---|-----|-----|------------|------|
|            | Ca(ICC2/ICC4958)SNP_01549 | 1022 | C | T | 5   | 3   | --         | --   |
| CakTC10405 | Ca(ICC2/ICC4958)SNP_01550 | 3654 | T | G | 10  | 3   | --         | --   |
| CakTC23915 | Ca(ICC2/ICC4958)SNP_01551 | 4781 | C | T | 3   | 4   | --         | --   |
|            | Ca(ICC2/ICC4958)SNP_01552 | 7702 | C | G | 19  | 11  | --         | --   |
| CakTC08608 | Ca(ICC2/ICC4958)SNP_01553 | 649  | A | G | 3   | 6   | --         | --   |
| CakTC10739 | Ca(ICC2/ICC4958)SNP_01554 | 822  | C | G | 3   | 4   | --         | --   |
| CakTC35465 | Ca(ICC2/ICC4958)SNP_01555 | 288  | A | C | 18  | 13  | --         | --   |
|            | Ca(ICC2/ICC4958)SNP_01556 | 454  | G | C | 28  | 21  | --         | --   |
|            | Ca(ICC2/ICC4958)SNP_01557 | 705  | C | T | 20  | 31  | --         | --   |
|            | Ca(ICC2/ICC4958)SNP_01558 | 1016 | A | G | 16  | 24  | --         | --   |
|            | Ca(ICC2/ICC4958)SNP_01559 | 1845 | G | T | 39  | 24  | --         | --   |
|            | Ca(ICC2/ICC4958)SNP_01560 | 2388 | A | C | 17  | 24  | --         | --   |
|            | Ca(ICC2/ICC4958)SNP_01561 | 2565 | C | T | 22  | 24  | --         | --   |
|            | Ca(ICC2/ICC4958)SNP_01562 | 2703 | A | G | 21  | 27  | --         | --   |
|            | Ca(ICC2/ICC4958)SNP_01563 | 2736 | C | T | 23  | 24  | --         | --   |
|            | Ca(ICC2/ICC4958)SNP_01564 | 4116 | G | A | 19  | 10  | --         | --   |
|            | Ca(ICC2/ICC4958)SNP_01565 | 4182 | A | G | 17  | 8   | --         | --   |
| CakTC24654 | Ca(ICC2/ICC4958)SNP_01566 | 899  | G | A | 3   | 5   | Flower bud | --   |
| CakTC30460 | Ca(ICC2/ICC4958)SNP_01567 | 71   | G | A | 3   | 5   | --         | --   |
|            | Ca(ICC2/ICC4958)SNP_01568 | 389  | A | G | 219 | 568 | --         | --   |
|            | Ca(ICC2/ICC4958)SNP_01569 | 662  | A | G | 253 | 489 | --         | --   |
|            | Ca(ICC2/ICC4958)SNP_01570 | 866  | C | T | 208 | 269 | --         | --   |
|            | Ca(ICC2/ICC4958)SNP_01571 | 1178 | C | T | 215 | 442 | --         | --   |
|            | Ca(ICC2/ICC4958)SNP_01572 | 1535 | T | G | 212 | 409 | --         | --   |
|            | Ca(ICC2/ICC4958)SNP_01573 | 1730 | G | A | 248 | 455 | --         | --   |
|            | Ca(ICC2/ICC4958)SNP_01574 | 1733 | T | C | 252 | 447 | --         | --   |
|            | Ca(ICC2/ICC4958)SNP_01575 | 1838 | C | T | 214 | 416 | --         | --   |
|            | Ca(ICC2/ICC4958)SNP_01576 | 1889 | T | C | 188 | 341 | --         | --   |
|            | Ca(ICC2/ICC4958)SNP_01577 | 1910 | A | G | 176 | 374 | --         | --   |
| CakTC13591 | Ca(ICC2/ICC4958)SNP_01578 | 184  | T | A | 3   | 3   | --         | --   |
| CakTC08179 | Ca(ICC2/ICC4958)SNP_01579 | 645  | C | T | 3   | 6   | --         | --   |
| CakTC25367 | Ca(ICC2/ICC4958)SNP_01580 | 563  | T | C | 38  | 39  | --         | --   |
|            | Ca(ICC2/ICC4958)SNP_01581 | 680  | C | T | 29  | 26  | --         | --   |
|            | Ca(ICC2/ICC4958)SNP_01582 | 917  | C | T | 39  | 38  | --         | --   |
|            | Ca(ICC2/ICC4958)SNP_01583 | 1151 | A | G | 46  | 31  | --         | --   |
|            | Ca(ICC2/ICC4958)SNP_01584 | 1304 | C | T | 51  | 39  | --         | --   |
|            | Ca(ICC2/ICC4958)SNP_01585 | 1604 | T | C | 30  | 34  | --         | --   |
|            | Ca(ICC2/ICC4958)SNP_01586 | 1775 | C | T | 50  | 35  | --         | --   |
|            | Ca(ICC2/ICC4958)SNP_01587 | 2228 | C | T | 52  | 38  | --         | --   |
|            | Ca(ICC2/ICC4958)SNP_01588 | 2804 | T | C | 62  | 74  | --         | --   |
|            | Ca(ICC2/ICC4958)SNP_01589 | 3590 | G | A | 83  | 59  | --         | --   |
| CakTC07160 | Ca(ICC2/ICC4958)SNP_01590 | 572  | T | C | 4   | 3   | --         | --   |
| CakTC37700 | Ca(ICC2/ICC4958)SNP_01591 | 217  | T | G | 16  | 9   | --         | --   |
|            | Ca(ICC2/ICC4958)SNP_01592 | 385  | T | C | 15  | 6   | --         | --   |
|            | Ca(ICC2/ICC4958)SNP_01593 | 517  | A | G | 7   | 5   | --         | --   |
| CakTC38174 | Ca(ICC2/ICC4958)SNP_01594 | 375  | C | G | 8   | 13  | --         | --   |
|            | Ca(ICC2/ICC4958)SNP_01595 | 445  | G | T | 10  | 15  | --         | --   |
|            | Ca(ICC2/ICC4958)SNP_01596 | 645  | A | G | 12  | 13  | --         | --   |
|            | Ca(ICC2/ICC4958)SNP_01597 | 670  | C | T | 14  | 13  | --         | --   |
|            | Ca(ICC2/ICC4958)SNP_01598 | 786  | A | T | 17  | 18  | --         | --   |
|            | Ca(ICC2/ICC4958)SNP_01599 | 787  | T | G | 17  | 17  | --         | --   |
|            | Ca(ICC2/ICC4958)SNP_01600 | 1448 | C | G | 10  | 15  | --         | --   |
|            | Ca(ICC2/ICC4958)SNP_01601 | 1505 | T | C | 7   | 10  | --         | --   |
| CakTC13412 | Ca(ICC2/ICC4958)SNP_01602 | 844  | T | C | 11  | 4   | --         | --   |
| CakTC34716 | Ca(ICC2/ICC4958)SNP_01603 | 335  | G | A | 13  | 24  | --         | --   |
|            | Ca(ICC2/ICC4958)SNP_01604 | 1651 | A | C | 22  | 13  | --         | --   |
|            | Ca(ICC2/ICC4958)SNP_01605 | 1961 | G | T | 20  | 14  | --         | --   |
|            | Ca(ICC2/ICC4958)SNP_01606 | 1967 | C | T | 20  | 12  | --         | --   |
|            | Ca(ICC2/ICC4958)SNP_01607 | 2972 | G | A | 14  | 10  | --         | --   |
|            | Ca(ICC2/ICC4958)SNP_01608 | 3290 | T | A | 8   | 15  | --         | --   |
| CakTC39940 | Ca(ICC2/ICC4958)SNP_01609 | 90   | G | C | 10  | 11  | --         | --   |
|            | Ca(ICC2/ICC4958)SNP_01610 | 130  | T | C | 10  | 8   | --         | --   |
|            | Ca(ICC2/ICC4958)SNP_01611 | 440  | T | A | 23  | 8   | --         | --   |
| CakTC42973 | Ca(ICC2/ICC4958)SNP_01612 | 1381 | C | G | 5   | 4   | --         | --   |
| CakTC26334 | Ca(ICC2/ICC4958)SNP_01613 | 221  | G | A | 3   | 6   | --         | --   |
|            | Ca(ICC2/ICC4958)SNP_01614 | 308  | G | A | 3   | 6   | --         | --   |
|            | Ca(ICC2/ICC4958)SNP_01615 | 355  | C | T | 7   | 8   | --         | --   |
|            | Ca(ICC2/ICC4958)SNP_01616 | 760  | G | A | 14  | 15  | --         | --   |
| CakTC25536 | Ca(ICC2/ICC4958)SNP_01617 | 1277 | A | G | 3   | 3   | --         | C2H2 |
| CakTC02493 | Ca(ICC2/ICC4958)SNP_01618 | 388  | G | T | 7   | 10  | --         | --   |
|            | Ca(ICC2/ICC4958)SNP_01619 | 394  | G | A | 13  | 10  | --         | --   |
|            | Ca(ICC2/ICC4958)SNP_01620 | 442  | C | T | 17  | 6   | --         | --   |
|            | Ca(ICC2/ICC4958)SNP_01621 | 454  | T | C | 22  | 7   | --         | --   |
|            | Ca(ICC2/ICC4958)SNP_01622 | 582  | T | C | 20  | 5   | --         | --   |

|            |                           |      |   |   |     |    |           |     |
|------------|---------------------------|------|---|---|-----|----|-----------|-----|
|            | Ca(ICC2/ICC4958)SNP_01623 | 586  | T | C | 19  | 7  | --        | --  |
|            | Ca(ICC2/ICC4958)SNP_01624 | 954  | A | G | 11  | 5  | --        | --  |
|            | Ca(ICC2/ICC4958)SNP_01625 | 1687 | G | A | 11  | 3  | --        | --  |
|            | Ca(ICC2/ICC4958)SNP_01626 | 1942 | A | G | 11  | 5  | --        | --  |
| CakTC04962 | Ca(ICC2/ICC4958)SNP_01627 | 130  | C | T | 3   | 3  | --        | --  |
|            | Ca(ICC2/ICC4958)SNP_01628 | 224  | A | G | 3   | 3  | --        | --  |
| CakTC13472 | Ca(ICC2/ICC4958)SNP_01629 | 167  | G | C | 3   | 3  | --        | --  |
| CakTC34378 | Ca(ICC2/ICC4958)SNP_01630 | 400  | C | T | 9   | 7  | --        | --  |
| CakTC14939 | Ca(ICC2/ICC4958)SNP_01631 | 263  | T | C | 3   | 3  | --        | --  |
|            | Ca(ICC2/ICC4958)SNP_01632 | 268  | A | T | 3   | 3  | --        | --  |
|            | Ca(ICC2/ICC4958)SNP_01633 | 293  | T | C | 3   | 3  | --        | --  |
| CakTC12359 | Ca(ICC2/ICC4958)SNP_01634 | 164  | G | A | 3   | 5  | --        | --  |
| CakTC40299 | Ca(ICC2/ICC4958)SNP_01635 | 221  | G | A | 4   | 5  | --        | --  |
| CakTC23204 | Ca(ICC2/ICC4958)SNP_01636 | 200  | A | G | 242 | 64 | --        | --  |
|            | Ca(ICC2/ICC4958)SNP_01637 | 641  | C | T | 425 | 63 | --        | --  |
|            | Ca(ICC2/ICC4958)SNP_01638 | 692  | T | C | 432 | 75 | --        | --  |
| CakTC34460 | Ca(ICC2/ICC4958)SNP_01639 | 917  | A | G | 4   | 4  | Young_pod | --  |
| CakTC26962 | Ca(ICC2/ICC4958)SNP_01640 | 253  | T | G | 16  | 11 | --        | --  |
| CakTC39977 | Ca(ICC2/ICC4958)SNP_01641 | 563  | A | G | 13  | 7  | --        | --  |
|            | Ca(ICC2/ICC4958)SNP_01642 | 587  | G | T | 12  | 8  | --        | --  |
|            | Ca(ICC2/ICC4958)SNP_01643 | 964  | C | A | 9   | 6  | --        | --  |
|            | Ca(ICC2/ICC4958)SNP_01644 | 1319 | A | G | 8   | 13 | --        | --  |
|            | Ca(ICC2/ICC4958)SNP_01645 | 1466 | A | T | 6   | 9  | --        | --  |
|            | Ca(ICC2/ICC4958)SNP_01646 | 1477 | A | G | 6   | 10 | --        | --  |
|            | Ca(ICC2/ICC4958)SNP_01647 | 1482 | G | A | 7   | 9  | --        | --  |
| CakTC31990 | Ca(ICC2/ICC4958)SNP_01648 | 260  | G | C | 6   | 5  | --        | --  |
|            | Ca(ICC2/ICC4958)SNP_01649 | 1343 | A | C | 3   | 6  | --        | --  |
|            | Ca(ICC2/ICC4958)SNP_01650 | 1373 | C | T | 3   | 6  | --        | --  |
| CakTC40412 | Ca(ICC2/ICC4958)SNP_01651 | 69   | T | C | 4   | 8  | --        | --  |
| CakTC27723 | Ca(ICC2/ICC4958)SNP_01652 | 1065 | A | C | 19  | 4  | --        | --  |
| CakTC26349 | Ca(ICC2/ICC4958)SNP_01653 | 372  | C | G | 25  | 39 | --        | --  |
| CakTC38794 | Ca(ICC2/ICC4958)SNP_01654 | 175  | T | C | 6   | 9  | --        | --  |
| CakTC39793 | Ca(ICC2/ICC4958)SNP_01655 | 275  | G | A | 5   | 5  | --        | --  |
|            | Ca(ICC2/ICC4958)SNP_01656 | 284  | T | C | 5   | 5  | --        | --  |
|            | Ca(ICC2/ICC4958)SNP_01657 | 340  | T | C | 6   | 5  | --        | --  |
|            | Ca(ICC2/ICC4958)SNP_01658 | 515  | A | G | 5   | 5  | --        | --  |
|            | Ca(ICC2/ICC4958)SNP_01659 | 563  | C | G | 3   | 5  | --        | --  |
| CakTC36542 | Ca(ICC2/ICC4958)SNP_01660 | 1544 | T | C | 52  | 39 | --        | --  |
| CakTC40013 | Ca(ICC2/ICC4958)SNP_01661 | 212  | G | C | 7   | 7  | --        | --  |
| CakTC11911 | Ca(ICC2/ICC4958)SNP_01662 | 1379 | C | T | 4   | 5  | --        | --  |
| CakTC27901 | Ca(ICC2/ICC4958)SNP_01663 | 201  | G | C | 4   | 5  | Young_pod | --  |
| CakTC09859 | Ca(ICC2/ICC4958)SNP_01664 | 4172 | G | A | 7   | 3  | --        | SET |
| CakTC38314 | Ca(ICC2/ICC4958)SNP_01665 | 648  | A | G | 9   | 5  | --        | --  |
| CakTC14073 | Ca(ICC2/ICC4958)SNP_01666 | 155  | T | C | 3   | 3  | --        | --  |
|            | Ca(ICC2/ICC4958)SNP_01667 | 173  | G | A | 3   | 3  | --        | --  |
|            | Ca(ICC2/ICC4958)SNP_01668 | 203  | T | A | 3   | 3  | --        | --  |
|            | Ca(ICC2/ICC4958)SNP_01669 | 212  | A | T | 3   | 3  | --        | --  |
| CakTC36522 | Ca(ICC2/ICC4958)SNP_01670 | 296  | T | C | 16  | 20 | --        | --  |
| CakTC29414 | Ca(ICC2/ICC4958)SNP_01671 | 1040 | A | G | 7   | 3  | --        | --  |
|            | Ca(ICC2/ICC4958)SNP_01672 | 1363 | G | A | 5   | 3  | --        | --  |
|            | Ca(ICC2/ICC4958)SNP_01673 | 2818 | C | T | 3   | 3  | --        | --  |
| CakTC25427 | Ca(ICC2/ICC4958)SNP_01674 | 42   | T | C | 15  | 28 | Root      | --  |
| CakTC39161 | Ca(ICC2/ICC4958)SNP_01675 | 392  | G | T | 16  | 10 | --        | --  |
| CakTC38007 | Ca(ICC2/ICC4958)SNP_01676 | 380  | G | A | 5   | 6  | --        | --  |
|            | Ca(ICC2/ICC4958)SNP_01677 | 569  | C | T | 12  | 10 | --        | --  |
|            | Ca(ICC2/ICC4958)SNP_01678 | 571  | C | A | 12  | 10 | --        | --  |
|            | Ca(ICC2/ICC4958)SNP_01679 | 581  | G | A | 13  | 9  | --        | --  |
| CakTC38014 | Ca(ICC2/ICC4958)SNP_01680 | 4    | G | A | 4   | 4  | --        | --  |
| CakTC11743 | Ca(ICC2/ICC4958)SNP_01681 | 823  | A | T | 3   | 4  | --        | --  |
| CakTC20931 | Ca(ICC2/ICC4958)SNP_01682 | 187  | G | A | 5   | 3  | --        | --  |
| CakTC09772 | Ca(ICC2/ICC4958)SNP_01683 | 326  | G | A | 4   | 4  | --        | --  |
|            | Ca(ICC2/ICC4958)SNP_01684 | 378  | C | T | 5   | 5  | --        | --  |
| CakTC26866 | Ca(ICC2/ICC4958)SNP_01685 | 275  | T | A | 24  | 43 | --        | --  |
| CakTC24824 | Ca(ICC2/ICC4958)SNP_01686 | 1098 | G | A | 6   | 11 | --        | MYB |
| CakTC39497 | Ca(ICC2/ICC4958)SNP_01687 | 292  | C | G | 5   | 4  | Shoot     | --  |
| CakTC30759 | Ca(ICC2/ICC4958)SNP_01688 | 868  | T | C | 11  | 9  | --        | --  |
|            | Ca(ICC2/ICC4958)SNP_01689 | 2484 | A | G | 4   | 4  | --        | --  |
| CakTC29294 | Ca(ICC2/ICC4958)SNP_01690 | 1611 | A | G | 4   | 3  | --        | NAC |
|            | Ca(ICC2/ICC4958)SNP_01691 | 1637 | A | T | 4   | 3  | --        | NAC |
| CakTC37604 | Ca(ICC2/ICC4958)SNP_01692 | 490  | A | G | 39  | 40 | --        | --  |
|            | Ca(ICC2/ICC4958)SNP_01693 | 1152 | A | G | 23  | 13 | --        | --  |
| CakTC41279 | Ca(ICC2/ICC4958)SNP_01694 | 1467 | G | A | 6   | 15 | --        | --  |
| CakTC25707 | Ca(ICC2/ICC4958)SNP_01695 | 1489 | G | A | 209 | 99 | --        | --  |
| CakTC10457 | Ca(ICC2/ICC4958)SNP_01696 | 168  | G | A | 6   | 5  | --        | --  |

|            |                           |      |   |   |    |     |    |      |
|------------|---------------------------|------|---|---|----|-----|----|------|
|            | Ca(ICC2/ICC4958)SNP_01697 | 340  | G | A | 6  | 6   | -- | --   |
| CakTC21542 | Ca(ICC2/ICC4958)SNP_01698 | 448  | A | G | 19 | 8   | -- | --   |
| CakTC37570 | Ca(ICC2/ICC4958)SNP_01699 | 987  | G | C | 35 | 32  | -- | --   |
| CakTC25154 | Ca(ICC2/ICC4958)SNP_01700 | 116  | G | C | 4  | 5   | -- | --   |
|            | Ca(ICC2/ICC4958)SNP_01701 | 1427 | C | T | 15 | 7   | -- | --   |
| CakTC06975 | Ca(ICC2/ICC4958)SNP_01702 | 327  | C | T | 4  | 3   | -- | --   |
| CakTC41659 | Ca(ICC2/ICC4958)SNP_01703 | 121  | A | C | 3  | 11  | -- | --   |
| CakTC24345 | Ca(ICC2/ICC4958)SNP_01704 | 1263 | T | A | 3  | 6   | -- | --   |
|            | Ca(ICC2/ICC4958)SNP_01705 | 1448 | G | A | 4  | 7   | -- | --   |
| CakTC10443 | Ca(ICC2/ICC4958)SNP_01706 | 843  | A | G | 11 | 4   | -- | --   |
| CakTC27400 | Ca(ICC2/ICC4958)SNP_01707 | 1028 | C | T | 6  | 9   | -- | --   |
| CakTC25937 | Ca(ICC2/ICC4958)SNP_01708 | 1390 | C | T | 19 | 19  | -- | --   |
| CakTC25176 | Ca(ICC2/ICC4958)SNP_01709 | 2435 | T | C | 13 | 11  | -- | --   |
| CakTC31139 | Ca(ICC2/ICC4958)SNP_01710 | 335  | A | G | 5  | 5   | -- | SRS  |
| CakTC43202 | Ca(ICC2/ICC4958)SNP_01711 | 74   | T | G | 14 | 13  | -- | --   |
| CakTC35140 | Ca(ICC2/ICC4958)SNP_01712 | 2058 | A | T | 9  | 21  | -- | --   |
| CakTC23314 | Ca(ICC2/ICC4958)SNP_01713 | 61   | C | T | 4  | 3   | -- | CCHC |
| CakTC08541 | Ca(ICC2/ICC4958)SNP_01714 | 431  | T | C | 3  | 5   | -- | --   |
| CakTC32575 | Ca(ICC2/ICC4958)SNP_01715 | 916  | C | G | 16 | 17  | -- | --   |
| CakTC22560 | Ca(ICC2/ICC4958)SNP_01716 | 666  | A | T | 6  | 8   | -- | --   |
| CakTC25060 | Ca(ICC2/ICC4958)SNP_01717 | 1299 | T | A | 3  | 4   | -- | --   |
|            | Ca(ICC2/ICC4958)SNP_01718 | 1602 | T | G | 3  | 3   | -- | --   |
| CakTC26651 | Ca(ICC2/ICC4958)SNP_01719 | 651  | C | A | 5  | 21  | -- | --   |
| CakTC36371 | Ca(ICC2/ICC4958)SNP_01720 | 546  | A | C | 5  | 3   | -- | --   |
| CakTC37460 | Ca(ICC2/ICC4958)SNP_01721 | 145  | T | C | 18 | 16  | -- | --   |
| CakTC29482 | Ca(ICC2/ICC4958)SNP_01722 | 1599 | G | T | 8  | 7   | -- | --   |
| CakTC09778 | Ca(ICC2/ICC4958)SNP_01723 | 196  | T | G | 4  | 11  | -- | --   |
|            | Ca(ICC2/ICC4958)SNP_01724 | 266  | G | A | 7  | 10  | -- | --   |
| CakTC23051 | Ca(ICC2/ICC4958)SNP_01725 | 93   | T | C | 12 | 3   | -- | --   |
| CakTC23814 | Ca(ICC2/ICC4958)SNP_01726 | 641  | C | G | 8  | 5   | -- | --   |
| CakTC33900 | Ca(ICC2/ICC4958)SNP_01727 | 333  | C | T | 4  | 21  | -- | --   |
| CakTC37581 | Ca(ICC2/ICC4958)SNP_01728 | 520  | C | T | 13 | 137 | -- | --   |
| CakTC39741 | Ca(ICC2/ICC4958)SNP_01729 | 457  | G | A | 8  | 3   | -- | SBP  |
| CakTC26909 | Ca(ICC2/ICC4958)SNP_01730 | 950  | C | T | 20 | 19  | -- | --   |
|            | Ca(ICC2/ICC4958)SNP_01731 | 1166 | C | T | 21 | 19  | -- | --   |
| CakTC08847 | Ca(ICC2/ICC4958)SNP_01732 | 1177 | T | A | 16 | 5   | -- | --   |
|            | Ca(ICC2/ICC4958)SNP_01733 | 1183 | C | T | 14 | 5   | -- | --   |
|            | Ca(ICC2/ICC4958)SNP_01734 | 1371 | G | A | 7  | 10  | -- | --   |
| CakTC34598 | Ca(ICC2/ICC4958)SNP_01735 | 1453 | C | T | 23 | 17  | -- | --   |
| CakTC33325 | Ca(ICC2/ICC4958)SNP_01736 | 394  | T | C | 13 | 9   | -- | --   |
|            | Ca(ICC2/ICC4958)SNP_01737 | 1567 | G | A | 18 | 15  | -- | --   |
|            | Ca(ICC2/ICC4958)SNP_01738 | 1605 | A | G | 22 | 12  | -- | --   |
|            | Ca(ICC2/ICC4958)SNP_01739 | 1755 | T | A | 11 | 8   | -- | --   |
|            | Ca(ICC2/ICC4958)SNP_01740 | 1855 | A | T | 12 | 3   | -- | --   |
|            | Ca(ICC2/ICC4958)SNP_01741 | 2060 | A | T | 11 | 5   | -- | --   |
|            | Ca(ICC2/ICC4958)SNP_01742 | 2071 | T | G | 12 | 5   | -- | --   |
| CakTC29746 | Ca(ICC2/ICC4958)SNP_01743 | 860  | G | C | 5  | 6   | -- | --   |
| CakTC21124 | Ca(ICC2/ICC4958)SNP_01744 | 143  | T | C | 4  | 8   | -- | --   |
|            | Ca(ICC2/ICC4958)SNP_01745 | 240  | G | T | 3  | 8   | -- | --   |
|            | Ca(ICC2/ICC4958)SNP_01746 | 241  | A | C | 4  | 8   | -- | --   |
| CakTC34127 | Ca(ICC2/ICC4958)SNP_01747 | 260  | G | A | 8  | 8   | -- | --   |
|            | Ca(ICC2/ICC4958)SNP_01748 | 346  | T | C | 10 | 9   | -- | --   |
| CakTC10785 | Ca(ICC2/ICC4958)SNP_01749 | 124  | A | G | 3  | 10  | -- | --   |
|            | Ca(ICC2/ICC4958)SNP_01750 | 241  | T | C | 6  | 11  | -- | --   |
|            | Ca(ICC2/ICC4958)SNP_01751 | 415  | T | G | 14 | 11  | -- | --   |
|            | Ca(ICC2/ICC4958)SNP_01752 | 421  | T | C | 14 | 12  | -- | --   |
|            | Ca(ICC2/ICC4958)SNP_01753 | 442  | C | T | 15 | 11  | -- | --   |
|            | Ca(ICC2/ICC4958)SNP_01754 | 709  | T | A | 13 | 12  | -- | --   |
|            | Ca(ICC2/ICC4958)SNP_01755 | 815  | A | G | 15 | 18  | -- | --   |
|            | Ca(ICC2/ICC4958)SNP_01756 | 1030 | A | G | 9  | 14  | -- | --   |
|            | Ca(ICC2/ICC4958)SNP_01757 | 1381 | A | G | 10 | 6   | -- | --   |
|            | Ca(ICC2/ICC4958)SNP_01758 | 1539 | T | C | 4  | 4   | -- | --   |
| CakTC32008 | Ca(ICC2/ICC4958)SNP_01759 | 216  | C | A | 3  | 4   | -- | --   |
| CakTC40602 | Ca(ICC2/ICC4958)SNP_01760 | 659  | A | G | 44 | 119 | -- | --   |
| CakTC42182 | Ca(ICC2/ICC4958)SNP_01761 | 618  | C | T | 3  | 5   | -- | --   |
| CakTC10990 | Ca(ICC2/ICC4958)SNP_01762 | 377  | A | G | 4  | 4   | -- | --   |
| CakTC37181 | Ca(ICC2/ICC4958)SNP_01763 | 690  | C | G | 5  | 8   | -- | --   |
| CakTC23040 | Ca(ICC2/ICC4958)SNP_01764 | 614  | G | T | 29 | 6   | -- | --   |
| CakTC38563 | Ca(ICC2/ICC4958)SNP_01765 | 769  | T | G | 20 | 10  | -- | --   |
| CakTC29573 | Ca(ICC2/ICC4958)SNP_01766 | 301  | C | T | 9  | 3   | -- | --   |
| CakTC38182 | Ca(ICC2/ICC4958)SNP_01767 | 103  | C | G | 5  | 8   | -- | --   |
|            | Ca(ICC2/ICC4958)SNP_01768 | 112  | C | G | 5  | 8   | -- | --   |
|            | Ca(ICC2/ICC4958)SNP_01769 | 303  | C | G | 6  | 5   | -- | --   |
|            | Ca(ICC2/ICC4958)SNP_01770 | 346  | G | A | 5  | 6   | -- | --   |

|            |                            |      |   |   |    |    |    |       |
|------------|----------------------------|------|---|---|----|----|----|-------|
| CakTC30706 | Ca(ICCv2/ICC4958)SNP_01771 | 687  | G | C | 7  | 5  | -- | --    |
|            | Ca(ICCv2/ICC4958)SNP_01772 | 771  | A | G | 7  | 8  | -- | --    |
| CakTC41841 | Ca(ICCv2/ICC4958)SNP_01773 | 49   | T | G | 29 | 18 | -- | CCAAT |
|            | Ca(ICCv2/ICC4958)SNP_01774 | 324  | A | G | 38 | 22 | -- | CCAAT |
|            | Ca(ICCv2/ICC4958)SNP_01775 | 360  | C | T | 47 | 23 | -- | CCAAT |
|            | Ca(ICCv2/ICC4958)SNP_01776 | 570  | G | C | 25 | 22 | -- | CCAAT |
|            | Ca(ICCv2/ICC4958)SNP_01777 | 588  | T | C | 24 | 22 | -- | CCAAT |
|            | Ca(ICCv2/ICC4958)SNP_01778 | 724  | C | G | 15 | 19 | -- | CCAAT |
| CakTC39027 | Ca(ICCv2/ICC4958)SNP_01779 | 551  | A | G | 4  | 11 | -- | --    |
|            | Ca(ICCv2/ICC4958)SNP_01780 | 749  | C | T | 4  | 6  | -- | --    |
| CakTC24425 | Ca(ICCv2/ICC4958)SNP_01781 | 103  | C | A | 5  | 3  | -- | --    |
| CakTC40475 | Ca(ICCv2/ICC4958)SNP_01782 | 59   | G | A | 7  | 11 | -- | --    |
|            | Ca(ICCv2/ICC4958)SNP_01783 | 142  | A | T | 7  | 18 | -- | --    |
|            | Ca(ICCv2/ICC4958)SNP_01784 | 304  | C | T | 7  | 22 | -- | --    |
|            | Ca(ICCv2/ICC4958)SNP_01785 | 2102 | G | A | 11 | 29 | -- | --    |
| CakTC33491 | Ca(ICCv2/ICC4958)SNP_01786 | 1234 | T | C | 16 | 10 | -- | --    |
|            | Ca(ICCv2/ICC4958)SNP_01787 | 1396 | C | A | 14 | 11 | -- | --    |
| CakTC34201 | Ca(ICCv2/ICC4958)SNP_01788 | 3724 | C | A | 7  | 11 | -- | --    |
| CakTC36196 | Ca(ICCv2/ICC4958)SNP_01789 | 649  | T | C | 3  | 8  | -- | --    |
| CakTC29183 | Ca(ICCv2/ICC4958)SNP_01790 | 896  | G | A | 16 | 11 | -- | --    |
| CakTC42484 | Ca(ICCv2/ICC4958)SNP_01791 | 193  | C | T | 8  | 8  | -- | --    |
| CakTC36203 | Ca(ICCv2/ICC4958)SNP_01792 | 2240 | T | C | 15 | 12 | -- | --    |
| CakTC38725 | Ca(ICCv2/ICC4958)SNP_01793 | 2829 | A | G | 5  | 5  | -- | --    |
| CakTC26978 | Ca(ICCv2/ICC4958)SNP_01794 | 169  | G | C | 4  | 4  | -- | --    |
|            | Ca(ICCv2/ICC4958)SNP_01795 | 178  | A | G | 4  | 4  | -- | --    |
|            | Ca(ICCv2/ICC4958)SNP_01796 | 184  | A | G | 4  | 4  | -- | --    |
| CakTC41706 | Ca(ICCv2/ICC4958)SNP_01797 | 28   | T | C | 3  | 3  | -- | --    |
| CakTC39980 | Ca(ICCv2/ICC4958)SNP_01798 | 1487 | G | A | 3  | 3  | -- | --    |
| CakTC27037 | Ca(ICCv2/ICC4958)SNP_01799 | 1407 | C | G | 12 | 8  | -- | --    |
| CakTC27502 | Ca(ICCv2/ICC4958)SNP_01800 | 1177 | T | G | 5  | 3  | -- | --    |
| CakTC24781 | Ca(ICCv2/ICC4958)SNP_01801 | 574  | T | C | 28 | 26 | -- | --    |
|            | Ca(ICCv2/ICC4958)SNP_01802 | 706  | A | G | 33 | 25 | -- | --    |
|            | Ca(ICCv2/ICC4958)SNP_01803 | 1682 | G | A | 13 | 7  | -- | --    |
|            | Ca(ICCv2/ICC4958)SNP_01804 | 1843 | A | G | 14 | 14 | -- | --    |
|            | Ca(ICCv2/ICC4958)SNP_01805 | 2172 | G | T | 8  | 12 | -- | --    |
|            | Ca(ICCv2/ICC4958)SNP_01806 | 2173 | A | T | 8  | 12 | -- | --    |
|            | Ca(ICCv2/ICC4958)SNP_01807 | 2575 | G | T | 13 | 15 | -- | --    |
| CakTC26560 | Ca(ICCv2/ICC4958)SNP_01808 | 1504 | A | G | 8  | 3  | -- | --    |
| CakTC28037 | Ca(ICCv2/ICC4958)SNP_01809 | 673  | G | A | 8  | 8  | -- | --    |
|            | Ca(ICCv2/ICC4958)SNP_01810 | 1153 | A | C | 4  | 3  | -- | --    |
|            | Ca(ICCv2/ICC4958)SNP_01811 | 1175 | G | C | 4  | 3  | -- | --    |
| CakTC11642 | Ca(ICCv2/ICC4958)SNP_01812 | 287  | T | C | 5  | 7  | -- | --    |
|            | Ca(ICCv2/ICC4958)SNP_01813 | 396  | G | A | 4  | 6  | -- | --    |
| CakTC06109 | Ca(ICCv2/ICC4958)SNP_01814 | 186  | A | C | 7  | 7  | -- | --    |
|            | Ca(ICCv2/ICC4958)SNP_01815 | 853  | A | G | 14 | 4  | -- | --    |
|            | Ca(ICCv2/ICC4958)SNP_01816 | 1077 | G | A | 18 | 6  | -- | --    |
| CakTC12115 | Ca(ICCv2/ICC4958)SNP_01817 | 95   | C | G | 11 | 3  | -- | --    |
|            | Ca(ICCv2/ICC4958)SNP_01818 | 135  | C | T | 11 | 4  | -- | --    |
| CakTC23247 | Ca(ICCv2/ICC4958)SNP_01819 | 275  | G | A | 44 | 55 | -- | --    |
| CakTC38102 | Ca(ICCv2/ICC4958)SNP_01820 | 398  | T | C | 5  | 4  | -- | --    |
| CakTC39355 | Ca(ICCv2/ICC4958)SNP_01821 | 1334 | A | G | 8  | 7  | -- | --    |
| CakTC02396 | Ca(ICCv2/ICC4958)SNP_01822 | 197  | A | G | 5  | 3  | -- | --    |
|            | Ca(ICCv2/ICC4958)SNP_01823 | 355  | T | C | 9  | 5  | -- | --    |
|            | Ca(ICCv2/ICC4958)SNP_01824 | 706  | T | C | 8  | 18 | -- | --    |
|            | Ca(ICCv2/ICC4958)SNP_01825 | 921  | T | C | 16 | 23 | -- | --    |
|            | Ca(ICCv2/ICC4958)SNP_01826 | 1294 | G | A | 12 | 11 | -- | --    |
|            | Ca(ICCv2/ICC4958)SNP_01827 | 1321 | A | C | 13 | 9  | -- | --    |
|            | Ca(ICCv2/ICC4958)SNP_01828 | 1432 | A | G | 8  | 6  | -- | --    |
|            | Ca(ICCv2/ICC4958)SNP_01829 | 1495 | A | G | 7  | 7  | -- | --    |
|            | Ca(ICCv2/ICC4958)SNP_01830 | 1612 | T | C | 6  | 4  | -- | --    |
| CakTC39748 | Ca(ICCv2/ICC4958)SNP_01831 | 1113 | T | C | 35 | 93 | -- | zf-HD |
|            | Ca(ICCv2/ICC4958)SNP_01832 | 1221 | G | A | 31 | 71 | -- | zf-HD |
| CakTC39377 | Ca(ICCv2/ICC4958)SNP_01833 | 1120 | T | C | 4  | 11 | -- | --    |
| CakTC10454 | Ca(ICCv2/ICC4958)SNP_01834 | 1636 | T | A | 3  | 5  | -- | --    |
|            | Ca(ICCv2/ICC4958)SNP_01835 | 2116 | T | C | 6  | 3  | -- | --    |
| CakTC05656 | Ca(ICCv2/ICC4958)SNP_01836 | 1611 | T | C | 3  | 3  | -- | --    |
| CakTC42926 | Ca(ICCv2/ICC4958)SNP_01837 | 852  | A | G | 8  | 27 | -- | MBFI  |
| CakTC30521 | Ca(ICCv2/ICC4958)SNP_01838 | 213  | T | A | 5  | 7  | -- | --    |
|            | Ca(ICCv2/ICC4958)SNP_01839 | 1011 | T | C | 4  | 4  | -- | --    |
|            | Ca(ICCv2/ICC4958)SNP_01840 | 1308 | A | G | 4  | 4  | -- | --    |
|            | Ca(ICCv2/ICC4958)SNP_01841 | 1323 | C | A | 4  | 7  | -- | --    |
| CakTC35851 | Ca(ICCv2/ICC4958)SNP_01842 | 2300 | T | C | 12 | 7  | -- | --    |
| CakTC37004 | Ca(ICCv2/ICC4958)SNP_01843 | 208  | T | C | 18 | 14 | -- | --    |
|            | Ca(ICCv2/ICC4958)SNP_01844 | 237  | C | A | 17 | 15 | -- | --    |

|            |                           |      |   |   |    |     |      |             |
|------------|---------------------------|------|---|---|----|-----|------|-------------|
|            | Ca(ICC2/ICC4958)SNP_01845 | 305  | T | C | 20 | 21  | --   | --          |
|            | Ca(ICC2/ICC4958)SNP_01846 | 1091 | G | A | 16 | 11  | --   | --          |
|            | Ca(ICC2/ICC4958)SNP_01847 | 1115 | T | C | 14 | 11  | --   | --          |
|            | Ca(ICC2/ICC4958)SNP_01848 | 1202 | C | G | 13 | 13  | --   | --          |
|            | Ca(ICC2/ICC4958)SNP_01849 | 1727 | A | G | 18 | 18  | --   | --          |
| CakTC10429 | Ca(ICC2/ICC4958)SNP_01850 | 446  | T | C | 3  | 3   | --   | --          |
| CakTC35601 | Ca(ICC2/ICC4958)SNP_01851 | 364  | A | T | 4  | 3   | --   | --          |
|            | Ca(ICC2/ICC4958)SNP_01852 | 398  | A | T | 4  | 3   | --   | --          |
| CakTC26761 | Ca(ICC2/ICC4958)SNP_01853 | 142  | T | C | 5  | 3   | --   | --          |
| CakTC33992 | Ca(ICC2/ICC4958)SNP_01854 | 5158 | A | G | 10 | 10  | --   | --          |
| CakTC24853 | Ca(ICC2/ICC4958)SNP_01855 | 978  | C | A | 18 | 10  | --   | --          |
|            | Ca(ICC2/ICC4958)SNP_01856 | 1110 | C | G | 8  | 7   | --   | --          |
| CakTC39880 | Ca(ICC2/ICC4958)SNP_01857 | 212  | T | C | 11 | 48  | --   | --          |
| CakTC30674 | Ca(ICC2/ICC4958)SNP_01858 | 1359 | T | G | 3  | 55  | --   | --          |
|            | Ca(ICC2/ICC4958)SNP_01859 | 1365 | A | G | 3  | 54  | --   | --          |
|            | Ca(ICC2/ICC4958)SNP_01860 | 1416 | G | A | 3  | 46  | --   | --          |
| CakTC39260 | Ca(ICC2/ICC4958)SNP_01861 | 1010 | T | A | 7  | 3   | --   | MYB-related |
| CakTC29906 | Ca(ICC2/ICC4958)SNP_01862 | 2574 | G | T | 25 | 19  | --   | --          |
|            | Ca(ICC2/ICC4958)SNP_01863 | 3693 | G | A | 26 | 17  | --   | --          |
| CakTC32982 | Ca(ICC2/ICC4958)SNP_01864 | 505  | A | T | 15 | 3   | --   | --          |
|            | Ca(ICC2/ICC4958)SNP_01865 | 2643 | C | G | 5  | 6   | --   | --          |
| CakTC26144 | Ca(ICC2/ICC4958)SNP_01866 | 248  | T | C | 23 | 19  | --   | --          |
|            | Ca(ICC2/ICC4958)SNP_01867 | 267  | A | C | 23 | 20  | --   | --          |
| CakTC17123 | Ca(ICC2/ICC4958)SNP_01868 | 538  | C | G | 4  | 3   | --   | --          |
| CakTC32675 | Ca(ICC2/ICC4958)SNP_01869 | 248  | T | C | 30 | 70  | --   | --          |
|            | Ca(ICC2/ICC4958)SNP_01870 | 257  | A | G | 34 | 71  | --   | --          |
|            | Ca(ICC2/ICC4958)SNP_01871 | 311  | A | G | 34 | 64  | --   | --          |
|            | Ca(ICC2/ICC4958)SNP_01872 | 518  | C | T | 46 | 101 | --   | --          |
|            | Ca(ICC2/ICC4958)SNP_01873 | 578  | G | T | 47 | 74  | --   | --          |
| CakTC34197 | Ca(ICC2/ICC4958)SNP_01874 | 217  | G | C | 18 | 59  | --   | TPR         |
|            | Ca(ICC2/ICC4958)SNP_01875 | 232  | T | C | 17 | 58  | --   | TPR         |
|            | Ca(ICC2/ICC4958)SNP_01876 | 863  | G | A | 26 | 64  | --   | TPR         |
|            | Ca(ICC2/ICC4958)SNP_01877 | 1520 | G | T | 42 | 63  | --   | TPR         |
|            | Ca(ICC2/ICC4958)SNP_01878 | 1787 | G | A | 31 | 49  | --   | TPR         |
|            | Ca(ICC2/ICC4958)SNP_01879 | 2052 | C | T | 9  | 12  | --   | TPR         |
| CakTC39160 | Ca(ICC2/ICC4958)SNP_01880 | 159  | T | C | 4  | 9   | --   | --          |
| CakTC29299 | Ca(ICC2/ICC4958)SNP_01881 | 1657 | A | G | 4  | 3   | --   | --          |
|            | Ca(ICC2/ICC4958)SNP_01882 | 2071 | C | A | 3  | 3   | --   | --          |
|            | Ca(ICC2/ICC4958)SNP_01883 | 2272 | T | A | 4  | 3   | --   | --          |
| CakTC10242 | Ca(ICC2/ICC4958)SNP_01884 | 1379 | C | T | 3  | 4   | --   | --          |
| CakTC25708 | Ca(ICC2/ICC4958)SNP_01885 | 754  | T | C | 3  | 4   | --   | --          |
|            | Ca(ICC2/ICC4958)SNP_01886 | 1461 | C | T | 4  | 12  | --   | --          |
|            | Ca(ICC2/ICC4958)SNP_01887 | 1912 | A | G | 6  | 4   | --   | --          |
|            | Ca(ICC2/ICC4958)SNP_01888 | 2158 | G | A | 7  | 11  | --   | --          |
|            | Ca(ICC2/ICC4958)SNP_01889 | 3012 | C | A | 5  | 3   | --   | --          |
| CakTC25702 | Ca(ICC2/ICC4958)SNP_01890 | 1876 | G | A | 7  | 10  | --   | --          |
|            | Ca(ICC2/ICC4958)SNP_01891 | 1897 | C | T | 7  | 9   | --   | --          |
|            | Ca(ICC2/ICC4958)SNP_01892 | 2016 | C | A | 5  | 5   | --   | --          |
|            | Ca(ICC2/ICC4958)SNP_01893 | 2030 | G | A | 3  | 5   | --   | --          |
|            | Ca(ICC2/ICC4958)SNP_01894 | 2033 | G | A | 3  | 5   | --   | --          |
| CakTC42785 | Ca(ICC2/ICC4958)SNP_01895 | 217  | A | G | 11 | 3   | --   | --          |
|            | Ca(ICC2/ICC4958)SNP_01896 | 239  | T | A | 11 | 3   | --   | --          |
|            | Ca(ICC2/ICC4958)SNP_01897 | 418  | T | C | 3  | 3   | --   | --          |
|            | Ca(ICC2/ICC4958)SNP_01898 | 537  | C | A | 3  | 3   | --   | --          |
| CakTC37403 | Ca(ICC2/ICC4958)SNP_01899 | 198  | T | C | 38 | 49  | --   | --          |
| CakTC10282 | Ca(ICC2/ICC4958)SNP_01900 | 980  | T | C | 6  | 3   | --   | ABI3VP1     |
| CakTC34533 | Ca(ICC2/ICC4958)SNP_01901 | 3622 | C | G | 8  | 10  | --   | SET         |
| CakTC35711 | Ca(ICC2/ICC4958)SNP_01902 | 3151 | G | A | 39 | 69  | --   | --          |
| CakTC19644 | Ca(ICC2/ICC4958)SNP_01903 | 751  | T | C | 4  | 3   | --   | --          |
| CakTC39777 | Ca(ICC2/ICC4958)SNP_01904 | 746  | G | C | 10 | 21  | --   | --          |
| CakTC28475 | Ca(ICC2/ICC4958)SNP_01905 | 260  | T | A | 5  | 4   | --   | --          |
|            | Ca(ICC2/ICC4958)SNP_01906 | 411  | C | T | 5  | 3   | --   | --          |
|            | Ca(ICC2/ICC4958)SNP_01907 | 2729 | G | A | 8  | 16  | --   | --          |
| CakTC11757 | Ca(ICC2/ICC4958)SNP_01908 | 693  | A | G | 4  | 3   | Root | --          |
| CakTC10219 | Ca(ICC2/ICC4958)SNP_01909 | 471  | T | G | 5  | 5   | --   | --          |
| CakTC21942 | Ca(ICC2/ICC4958)SNP_01910 | 320  | A | G | 8  | 4   | --   | --          |
| CakTC37315 | Ca(ICC2/ICC4958)SNP_01911 | 833  | A | G | 46 | 27  | --   | --          |
| CakTC32764 | Ca(ICC2/ICC4958)SNP_01912 | 577  | G | A | 5  | 4   | --   | --          |
|            | Ca(ICC2/ICC4958)SNP_01913 | 2068 | A | T | 7  | 3   | --   | --          |
|            | Ca(ICC2/ICC4958)SNP_01914 | 2179 | G | A | 5  | 4   | --   | --          |
| CakTC03897 | Ca(ICC2/ICC4958)SNP_01915 | 427  | A | G | 8  | 4   | --   | GRAS        |
|            | Ca(ICC2/ICC4958)SNP_01916 | 604  | G | A | 7  | 7   | --   | GRAS        |
|            | Ca(ICC2/ICC4958)SNP_01917 | 985  | A | G | 11 | 8   | --   | GRAS        |
|            | Ca(ICC2/ICC4958)SNP_01918 | 1009 | T | C | 9  | 7   | --   | GRAS        |

|            |                           |      |   |   |     |     |            |           |
|------------|---------------------------|------|---|---|-----|-----|------------|-----------|
|            | Ca(ICC2/ICC4958)SNP_01919 | 1263 | C | T | 10  | 4   | --         | GRAS      |
|            | Ca(ICC2/ICC4958)SNP_01920 | 1362 | A | G | 10  | 6   | --         | GRAS      |
|            | Ca(ICC2/ICC4958)SNP_01921 | 1417 | C | T | 7   | 5   | --         | GRAS      |
|            | Ca(ICC2/ICC4958)SNP_01922 | 1528 | A | G | 7   | 3   | --         | GRAS      |
|            | Ca(ICC2/ICC4958)SNP_01923 | 1592 | C | G | 9   | 4   | --         | GRAS      |
|            | Ca(ICC2/ICC4958)SNP_01924 | 1624 | T | C | 9   | 4   | --         | GRAS      |
|            | Ca(ICC2/ICC4958)SNP_01925 | 1625 | G | A | 9   | 4   | --         | GRAS      |
|            | Ca(ICC2/ICC4958)SNP_01926 | 1796 | A | C | 8   | 4   | --         | GRAS      |
|            | Ca(ICC2/ICC4958)SNP_01927 | 2623 | T | A | 3   | 3   | --         | GRAS      |
| CakTC10854 | Ca(ICC2/ICC4958)SNP_01928 | 297  | T | C | 3   | 3   | --         | --        |
| CakTC36380 | Ca(ICC2/ICC4958)SNP_01929 | 110  | A | G | 18  | 3   | --         | --        |
| CakTC26857 | Ca(ICC2/ICC4958)SNP_01930 | 1577 | G | A | 13  | 12  | --         | --        |
|            | Ca(ICC2/ICC4958)SNP_01931 | 2882 | T | C | 8   | 8   | --         | --        |
|            | Ca(ICC2/ICC4958)SNP_01932 | 2972 | G | A | 9   | 8   | --         | --        |
| CakTC38606 | Ca(ICC2/ICC4958)SNP_01933 | 267  | A | G | 4   | 7   | --         | C2C2-GATA |
|            | Ca(ICC2/ICC4958)SNP_01934 | 279  | T | A | 5   | 7   | --         | C2C2-GATA |
|            | Ca(ICC2/ICC4958)SNP_01935 | 490  | G | C | 11  | 4   | --         | C2C2-GATA |
|            | Ca(ICC2/ICC4958)SNP_01936 | 661  | C | T | 15  | 5   | --         | C2C2-GATA |
|            | Ca(ICC2/ICC4958)SNP_01937 | 820  | G | A | 17  | 7   | --         | C2C2-GATA |
| CakTC39282 | Ca(ICC2/ICC4958)SNP_01938 | 849  | T | C | 5   | 8   | --         | --        |
| CakTC40336 | Ca(ICC2/ICC4958)SNP_01939 | 121  | C | A | 6   | 11  | --         | --        |
| CakTC04658 | Ca(ICC2/ICC4958)SNP_01940 | 600  | T | C | 6   | 11  | --         | --        |
| CakTC42568 | Ca(ICC2/ICC4958)SNP_01941 | 1061 | A | C | 7   | 11  | --         | --        |
| CakTC27441 | Ca(ICC2/ICC4958)SNP_01942 | 26   | C | T | 15  | 14  | --         | --        |
|            | Ca(ICC2/ICC4958)SNP_01943 | 68   | G | C | 18  | 17  | --         | --        |
|            | Ca(ICC2/ICC4958)SNP_01944 | 355  | T | A | 43  | 24  | --         | --        |
|            | Ca(ICC2/ICC4958)SNP_01945 | 1001 | A | G | 47  | 31  | --         | --        |
|            | Ca(ICC2/ICC4958)SNP_01946 | 1030 | C | T | 45  | 32  | --         | --        |
|            | Ca(ICC2/ICC4958)SNP_01947 | 1099 | G | A | 31  | 26  | --         | --        |
|            | Ca(ICC2/ICC4958)SNP_01948 | 1101 | T | C | 34  | 26  | --         | --        |
| CakTC35770 | Ca(ICC2/ICC4958)SNP_01949 | 2881 | T | C | 6   | 3   | --         | --        |
| CakTC27681 | Ca(ICC2/ICC4958)SNP_01950 | 975  | G | A | 4   | 3   | --         | --        |
| CakTC23916 | Ca(ICC2/ICC4958)SNP_01951 | 1073 | T | G | 7   | 5   | --         | --        |
|            | Ca(ICC2/ICC4958)SNP_01952 | 1684 | G | A | 5   | 7   | --         | --        |
|            | Ca(ICC2/ICC4958)SNP_01953 | 1760 | T | C | 4   | 4   | --         | --        |
|            | Ca(ICC2/ICC4958)SNP_01954 | 2861 | T | C | 4   | 5   | --         | --        |
|            | Ca(ICC2/ICC4958)SNP_01955 | 2960 | C | G | 4   | 4   | --         | --        |
| CakTC42135 | Ca(ICC2/ICC4958)SNP_01956 | 325  | T | C | 15  | 15  | --         | AP2-EREBP |
| CakTC22939 | Ca(ICC2/ICC4958)SNP_01957 | 2896 | C | T | 228 | 229 | --         | --        |
| CakTC31747 | Ca(ICC2/ICC4958)SNP_01958 | 2159 | C | G | 4   | 3   | --         | --        |
| CakTC26955 | Ca(ICC2/ICC4958)SNP_01959 | 2414 | A | G | 4   | 5   | --         | --        |
| CakTC40688 | Ca(ICC2/ICC4958)SNP_01960 | 202  | G | T | 5   | 9   | --         | --        |
| CakTC39393 | Ca(ICC2/ICC4958)SNP_01961 | 603  | C | A | 31  | 39  | --         | --        |
|            | Ca(ICC2/ICC4958)SNP_01962 | 714  | G | C | 45  | 43  | --         | --        |
|            | Ca(ICC2/ICC4958)SNP_01963 | 1026 | T | A | 26  | 52  | --         | --        |
|            | Ca(ICC2/ICC4958)SNP_01964 | 1331 | G | T | 20  | 41  | --         | --        |
| CakTC42868 | Ca(ICC2/ICC4958)SNP_01965 | 568  | A | G | 6   | 3   | --         | --        |
| CakTC13274 | Ca(ICC2/ICC4958)SNP_01966 | 234  | A | T | 5   | 3   | Flower bud | --        |
|            | Ca(ICC2/ICC4958)SNP_01967 | 235  | T | G | 4   | 3   | Flower bud | --        |
|            | Ca(ICC2/ICC4958)SNP_01968 | 248  | T | A | 4   | 3   | Flower bud | --        |
|            | Ca(ICC2/ICC4958)SNP_01969 | 251  | A | G | 3   | 3   | Flower bud | --        |
|            | Ca(ICC2/ICC4958)SNP_01970 | 273  | A | C | 4   | 3   | Flower bud | --        |
|            | Ca(ICC2/ICC4958)SNP_01971 | 343  | A | G | 8   | 3   | Flower bud | --        |
| CakTC33936 | Ca(ICC2/ICC4958)SNP_01972 | 353  | T | C | 5   | 8   | --         | --        |
| CakTC40247 | Ca(ICC2/ICC4958)SNP_01973 | 787  | T | C | 4   | 10  | --         | --        |
|            | Ca(ICC2/ICC4958)SNP_01974 | 986  | A | G | 5   | 8   | --         | --        |
| CakTC38762 | Ca(ICC2/ICC4958)SNP_01975 | 1142 | C | G | 11  | 13  | --         | --        |
| CakTC13926 | Ca(ICC2/ICC4958)SNP_01976 | 1289 | A | G | 4   | 3   | --         | --        |
| CakTC33875 | Ca(ICC2/ICC4958)SNP_01977 | 1986 | C | T | 7   | 13  | --         | --        |
|            | Ca(ICC2/ICC4958)SNP_01978 | 2160 | G | A | 4   | 11  | --         | --        |
| CakTC09935 | Ca(ICC2/ICC4958)SNP_01979 | 225  | T | C | 6   | 6   | Flower bud | --        |
| CakTC29977 | Ca(ICC2/ICC4958)SNP_01980 | 531  | C | T | 33  | 38  | --         | --        |
| CakTC32000 | Ca(ICC2/ICC4958)SNP_01981 | 1602 | T | G | 6   | 10  | --         | --        |
| CakTC10543 | Ca(ICC2/ICC4958)SNP_01982 | 167  | T | G | 4   | 3   | --         | --        |
|            | Ca(ICC2/ICC4958)SNP_01983 | 171  | T | G | 4   | 3   | --         | --        |
|            | Ca(ICC2/ICC4958)SNP_01984 | 186  | C | A | 5   | 4   | --         | --        |
|            | Ca(ICC2/ICC4958)SNP_01985 | 206  | T | A | 5   | 4   | --         | --        |
| CakTC05357 | Ca(ICC2/ICC4958)SNP_01986 | 290  | G | A | 16  | 11  | --         | --        |
