# Supplementary material
Source: publisher figshare collection journal article supplement (https://plos.figshare.com/articles/dataset/_/115291)
Supplement: Supplementary file 1 [file 1 › Table_S11.pdf]

**Table S11.** List of SNPs identified between kabuli and wild chickpea.

| Kabuli transcript ID | SNP_IDS                    | SNP position (kabuli) | Kabuli allele | Wild allele | Read depth kabuli | Read depth wild | Tissue specificity | TF family |
|----------------------|----------------------------|-----------------------|---------------|-------------|-------------------|-----------------|--------------------|-----------|
| CakTC31493           | Ca(ICC2/P1489777)SNP_00001 | 977                   | G             | A           | 8                 | 3               | --                 | --        |
| CakTC42908           | Ca(ICC2/P1489777)SNP_00002 | 296                   | C             | T           | 7                 | 14              | --                 | --        |
|                      | Ca(ICC2/P1489777)SNP_00003 | 997                   | A             | G           | 36                | 10              | --                 | --        |
|                      | Ca(ICC2/P1489777)SNP_00004 | 1673                  | A             | C           | 12                | 3               | --                 | --        |
|                      | Ca(ICC2/P1489777)SNP_00005 | 1768                  | G             | C           | 10                | 5               | --                 | --        |
|                      | Ca(ICC2/P1489777)SNP_00006 | 1847                  | C             | G           | 9                 | 7               | --                 | --        |
| CakTC38477           | Ca(ICC2/P1489777)SNP_00007 | 69                    | G             | T           | 23                | 11              | --                 | --        |
|                      | Ca(ICC2/P1489777)SNP_00008 | 83                    | T             | C           | 27                | 13              | --                 | --        |
|                      | Ca(ICC2/P1489777)SNP_00009 | 252                   | T             | C           | 34                | 14              | --                 | --        |
| CakTC22840           | Ca(ICC2/P1489777)SNP_00010 | 1444                  | A             | T           | 6                 | 8               | --                 | --        |
|                      | Ca(ICC2/P1489777)SNP_00011 | 1471                  | C             | A           | 6                 | 6               | --                 | --        |
|                      | Ca(ICC2/P1489777)SNP_00012 | 1478                  | A             | C           | 6                 | 7               | --                 | --        |
|                      | Ca(ICC2/P1489777)SNP_00013 | 1510                  | T             | A           | 7                 | 8               | --                 | --        |
|                      | Ca(ICC2/P1489777)SNP_00014 | 1512                  | C             | T           | 7                 | 8               | --                 | --        |
|                      | Ca(ICC2/P1489777)SNP_00015 | 1579                  | G             | A           | 5                 | 4               | --                 | --        |
|                      | Ca(ICC2/P1489777)SNP_00016 | 1602                  | A             | G           | 8                 | 8               | --                 | --        |
|                      | Ca(ICC2/P1489777)SNP_00017 | 1604                  | A             | C           | 8                 | 8               | --                 | --        |
|                      | Ca(ICC2/P1489777)SNP_00018 | 1613                  | T             | C           | 6                 | 7               | --                 | --        |
|                      | Ca(ICC2/P1489777)SNP_00019 | 1642                  | C             | T           | 6                 | 8               | --                 | --        |
|                      | Ca(ICC2/P1489777)SNP_00020 | 1643                  | T             | C           | 7                 | 7               | --                 | --        |
|                      | Ca(ICC2/P1489777)SNP_00021 | 1678                  | G             | T           | 8                 | 7               | --                 | --        |
|                      | Ca(ICC2/P1489777)SNP_00022 | 1736                  | A             | G           | 9                 | 7               | --                 | --        |
|                      | Ca(ICC2/P1489777)SNP_00023 | 1743                  | C             | A           | 9                 | 7               | --                 | --        |
| CakTC28571           | Ca(ICC2/P1489777)SNP_00024 | 1688                  | C             | T           | 24                | 18              | --                 | CCHC      |
|                      | Ca(ICC2/P1489777)SNP_00025 | 1961                  | A             | G           | 33                | 11              | --                 | CCHC      |
|                      | Ca(ICC2/P1489777)SNP_00026 | 1964                  | G             | T           | 32                | 11              | --                 | CCHC      |
|                      | Ca(ICC2/P1489777)SNP_00027 | 2192                  | A             | T           | 36                | 7               | --                 | CCHC      |
| CakTC40343           | Ca(ICC2/P1489777)SNP_00028 | 353                   | G             | A           | 13                | 9               | --                 | CCHC      |
|                      | Ca(ICC2/P1489777)SNP_00029 | 623                   | A             | G           | 5                 | 5               | --                 | CCHC      |
|                      | Ca(ICC2/P1489777)SNP_00030 | 632                   | T             | C           | 5                 | 5               | --                 | CCHC      |
|                      | Ca(ICC2/P1489777)SNP_00031 | 654                   | G             | A           | 6                 | 6               | --                 | CCHC      |
|                      | Ca(ICC2/P1489777)SNP_00032 | 791                   | A             | G           | 12                | 9               | --                 | CCHC      |
|                      | Ca(ICC2/P1489777)SNP_00033 | 1115                  | T             | C           | 8                 | 8               | --                 | CCHC      |
|                      | Ca(ICC2/P1489777)SNP_00034 | 1715                  | C             | T           | 16                | 4               | --                 | CCHC      |
|                      | Ca(ICC2/P1489777)SNP_00035 | 1782                  | A             | G           | 14                | 5               | --                 | CCHC      |
|                      | Ca(ICC2/P1489777)SNP_00036 | 1926                  | G             | A           | 5                 | 3               | --                 | CCHC      |
| CakTC22593           | Ca(ICC2/P1489777)SNP_00037 | 579                   | A             | T           | 13                | 3               | Young_pod          | --        |
|                      | Ca(ICC2/P1489777)SNP_00038 | 1620                  | C             | T           | 5                 | 6               | Young_pod          | --        |
|                      | Ca(ICC2/P1489777)SNP_00039 | 1861                  | T             | G           | 7                 | 8               | Young_pod          | --        |
| CakTC23721           | Ca(ICC2/P1489777)SNP_00040 | 488                   | C             | G           | 9                 | 9               | --                 | --        |
| CakTC38575           | Ca(ICC2/P1489777)SNP_00041 | 167                   | G             | A           | 13                | 8               | --                 | --        |
|                      | Ca(ICC2/P1489777)SNP_00042 | 533                   | T             | C           | 14                | 5               | --                 | --        |
|                      | Ca(ICC2/P1489777)SNP_00043 | 735                   | A             | G           | 9                 | 7               | --                 | --        |
| CakTC35170           | Ca(ICC2/P1489777)SNP_00044 | 704                   | C             | T           | 4                 | 5               | Shoot              | MYB       |
|                      | Ca(ICC2/P1489777)SNP_00045 | 717                   | C             | G           | 5                 | 6               | Shoot              | MYB       |
|                      | Ca(ICC2/P1489777)SNP_00046 | 2667                  | T             | C           | 8                 | 4               | Shoot              | MYB       |
|                      | Ca(ICC2/P1489777)SNP_00047 | 3033                  | C             | T           | 5                 | 5               | Shoot              | MYB       |
| CakTC43109           | Ca(ICC2/P1489777)SNP_00048 | 503                   | T             | C           | 7                 | 8               | --                 | --        |
|                      | Ca(ICC2/P1489777)SNP_00049 | 602                   | A             | G           | 6                 | 4               | --                 | --        |
| CakTC42297           | Ca(ICC2/P1489777)SNP_00050 | 70                    | G             | C           | 8                 | 6               | --                 | bZIP      |
|                      | Ca(ICC2/P1489777)SNP_00051 | 111                   | G             | C           | 9                 | 8               | --                 | bZIP      |
|                      | Ca(ICC2/P1489777)SNP_00052 | 208                   | C             | G           | 10                | 8               | --                 | bZIP      |
|                      | Ca(ICC2/P1489777)SNP_00053 | 422                   | T             | A           | 12                | 10              | --                 | bZIP      |
| CakTC35177           | Ca(ICC2/P1489777)SNP_00054 | 204                   | C             | T           | 6                 | 5               | --                 | --        |
|                      | Ca(ICC2/P1489777)SNP_00055 | 322                   | A             | T           | 3                 | 5               | --                 | --        |
|                      | Ca(ICC2/P1489777)SNP_00056 | 1117                  | T             | A           | 7                 | 10              | --                 | --        |
|                      | Ca(ICC2/P1489777)SNP_00057 | 1276                  | C             | T           | 7                 | 5               | --                 | --        |
|                      | Ca(ICC2/P1489777)SNP_00058 | 1351                  | T             | C           | 5                 | 4               | --                 | --        |
|                      | Ca(ICC2/P1489777)SNP_00059 | 1910                  | T             | C           | 5                 | 5               | --                 | --        |
|                      | Ca(ICC2/P1489777)SNP_00060 | 2112                  | G             | A           | 8                 | 3               | --                 | --        |
| CakTC26261           | Ca(ICC2/P1489777)SNP_00061 | 304                   | A             | G           | 13                | 17              | --                 | --        |
|                      | Ca(ICC2/P1489777)SNP_00062 | 385                   | G             | C           | 10                | 10              | --                 | --        |
|                      | Ca(ICC2/P1489777)SNP_00063 | 744                   | T             | A           | 9                 | 10              | --                 | --        |
|                      | Ca(ICC2/P1489777)SNP_00064 | 757                   | C             | T           | 8                 | 10              | --                 | --        |
|                      | Ca(ICC2/P1489777)SNP_00065 | 911                   | T             | C           | 5                 | 9               | --                 | --        |
| CakTC23948           | Ca(ICC2/P1489777)SNP_00066 | 1235                  | C             | G           | 173               | 81              | --                 | --        |
| CakTC39219           | Ca(ICC2/P1489777)SNP_00067 | 104                   | C             | A           | 13                | 7               | --                 | --        |
|                      | Ca(ICC2/P1489777)SNP_00068 | 591                   | A             | T           | 13                | 13              | --                 | --        |
|                      | Ca(ICC2/P1489777)SNP_00069 | 954                   | C             | T           | 14                | 12              | --                 | --        |

|            |                            |      |   |   |     |    |           |          |
|------------|----------------------------|------|---|---|-----|----|-----------|----------|
|            | Ca(ICC2/PI489777)SNP_00070 | 979  | A | G | 13  | 17 | --        | --       |
|            | Ca(ICC2/PI489777)SNP_00071 | 1056 | G | A | 10  | 17 | --        | --       |
|            | Ca(ICC2/PI489777)SNP_00072 | 1331 | C | T | 18  | 11 | --        | --       |
|            | Ca(ICC2/PI489777)SNP_00073 | 1385 | T | C | 10  | 9  | --        | --       |
|            | Ca(ICC2/PI489777)SNP_00074 | 1390 | G | A | 13  | 9  | --        | --       |
|            | Ca(ICC2/PI489777)SNP_00075 | 1472 | T | G | 10  | 8  | --        | --       |
| CakTC06071 | Ca(ICC2/PI489777)SNP_00076 | 4262 | C | T | 9   | 5  | --        | --       |
|            | Ca(ICC2/PI489777)SNP_00077 | 4285 | G | A | 9   | 6  | --        | --       |
| CakTC22879 | Ca(ICC2/PI489777)SNP_00078 | 594  | C | T | 13  | 12 | --        | --       |
|            | Ca(ICC2/PI489777)SNP_00079 | 975  | G | A | 16  | 10 | --        | --       |
|            | Ca(ICC2/PI489777)SNP_00080 | 1180 | C | A | 8   | 7  | --        | --       |
| CakTC32038 | Ca(ICC2/PI489777)SNP_00081 | 75   | G | C | 10  | 7  | --        | --       |
|            | Ca(ICC2/PI489777)SNP_00082 | 108  | T | C | 9   | 7  | --        | --       |
|            | Ca(ICC2/PI489777)SNP_00083 | 617  | A | G | 9   | 5  | --        | --       |
|            | Ca(ICC2/PI489777)SNP_00084 | 1022 | T | C | 6   | 4  | --        | --       |
|            | Ca(ICC2/PI489777)SNP_00085 | 1688 | C | A | 10  | 8  | --        | --       |
|            | Ca(ICC2/PI489777)SNP_00086 | 1710 | G | A | 8   | 8  | --        | --       |
|            | Ca(ICC2/PI489777)SNP_00087 | 1834 | A | G | 10  | 5  | --        | --       |
|            | Ca(ICC2/PI489777)SNP_00088 | 2835 | G | A | 3   | 3  | --        | --       |
|            | Ca(ICC2/PI489777)SNP_00089 | 2836 | C | G | 3   | 3  | --        | --       |
|            | Ca(ICC2/PI489777)SNP_00090 | 3531 | G | A | 7   | 4  | --        | --       |
|            | Ca(ICC2/PI489777)SNP_00091 | 4119 | A | C | 15  | 3  | --        | --       |
|            | Ca(ICC2/PI489777)SNP_00092 | 4383 | A | G | 19  | 4  | --        | --       |
|            | Ca(ICC2/PI489777)SNP_00093 | 4464 | G | C | 15  | 9  | --        | --       |
|            | Ca(ICC2/PI489777)SNP_00094 | 4793 | G | A | 16  | 10 | --        | --       |
| CakTC31333 | Ca(ICC2/PI489777)SNP_00095 | 1162 | G | C | 7   | 5  | Young_pod | --       |
| CakTC43001 | Ca(ICC2/PI489777)SNP_00096 | 172  | G | A | 32  | 24 | --        | --       |
| CakTC29187 | Ca(ICC2/PI489777)SNP_00097 | 1229 | A | G | 29  | 5  | --        | CCHC     |
|            | Ca(ICC2/PI489777)SNP_00098 | 1238 | A | G | 30  | 5  | --        | CCHC     |
|            | Ca(ICC2/PI489777)SNP_00099 | 1280 | A | G | 31  | 5  | --        | CCHC     |
|            | Ca(ICC2/PI489777)SNP_00100 | 1340 | G | T | 27  | 6  | --        | CCHC     |
|            | Ca(ICC2/PI489777)SNP_00101 | 1350 | A | C | 26  | 5  | --        | CCHC     |
|            | Ca(ICC2/PI489777)SNP_00102 | 1412 | G | C | 23  | 6  | --        | CCHC     |
|            | Ca(ICC2/PI489777)SNP_00103 | 1421 | C | T | 22  | 6  | --        | CCHC     |
|            | Ca(ICC2/PI489777)SNP_00104 | 1442 | G | T | 18  | 5  | --        | CCHC     |
| CakTC39975 | Ca(ICC2/PI489777)SNP_00105 | 982  | A | C | 17  | 11 | --        | --       |
| CakTC39048 | Ca(ICC2/PI489777)SNP_00106 | 933  | G | T | 6   | 8  | --        | --       |
|            | Ca(ICC2/PI489777)SNP_00107 | 1029 | G | A | 6   | 14 | --        | --       |
| CakTC10736 | Ca(ICC2/PI489777)SNP_00108 | 313  | C | T | 13  | 17 | --        | --       |
|            | Ca(ICC2/PI489777)SNP_00109 | 662  | G | C | 13  | 9  | --        | --       |
|            | Ca(ICC2/PI489777)SNP_00110 | 1265 | A | C | 5   | 5  | --        | --       |
| CakTC39125 | Ca(ICC2/PI489777)SNP_00111 | 1341 | A | C | 8   | 9  | --        | bZIP     |
| CakTC24040 | Ca(ICC2/PI489777)SNP_00112 | 599  | A | G | 14  | 8  | --        | --       |
|            | Ca(ICC2/PI489777)SNP_00113 | 866  | G | A | 17  | 22 | --        | --       |
|            | Ca(ICC2/PI489777)SNP_00114 | 1891 | T | C | 23  | 6  | --        | --       |
| CakTC38380 | Ca(ICC2/PI489777)SNP_00115 | 429  | A | G | 4   | 5  | --        | C2C2-Dof |
|            | Ca(ICC2/PI489777)SNP_00116 | 498  | T | C | 5   | 4  | --        | C2C2-Dof |
|            | Ca(ICC2/PI489777)SNP_00117 | 980  | T | C | 4   | 5  | --        | C2C2-Dof |
|            | Ca(ICC2/PI489777)SNP_00118 | 1027 | T | C | 4   | 5  | --        | C2C2-Dof |
| CakTC24318 | Ca(ICC2/PI489777)SNP_00119 | 1007 | T | C | 3   | 3  | Root      | --       |
| CakTC23605 | Ca(ICC2/PI489777)SNP_00120 | 70   | C | T | 11  | 5  | --        | PLATZ    |
|            | Ca(ICC2/PI489777)SNP_00121 | 374  | T | C | 77  | 28 | --        | PLATZ    |
|            | Ca(ICC2/PI489777)SNP_00122 | 901  | A | G | 126 | 53 | --        | PLATZ    |
|            | Ca(ICC2/PI489777)SNP_00123 | 1000 | G | A | 163 | 53 | --        | PLATZ    |
| CakTC42392 | Ca(ICC2/PI489777)SNP_00124 | 256  | C | G | 13  | 3  | --        | --       |
| CakTC39988 | Ca(ICC2/PI489777)SNP_00125 | 395  | T | C | 14  | 9  | --        | --       |
|            | Ca(ICC2/PI489777)SNP_00126 | 425  | A | G | 10  | 8  | --        | --       |
|            | Ca(ICC2/PI489777)SNP_00127 | 961  | G | C | 20  | 9  | --        | --       |
|            | Ca(ICC2/PI489777)SNP_00128 | 971  | T | C | 18  | 9  | --        | --       |
|            | Ca(ICC2/PI489777)SNP_00129 | 973  | G | C | 17  | 8  | --        | --       |
|            | Ca(ICC2/PI489777)SNP_00130 | 1008 | T | C | 17  | 9  | --        | --       |
|            | Ca(ICC2/PI489777)SNP_00131 | 1087 | A | T | 16  | 7  | --        | --       |
| CakTC07561 | Ca(ICC2/PI489777)SNP_00132 | 539  | A | C | 7   | 3  | --        | --       |
|            | Ca(ICC2/PI489777)SNP_00133 | 623  | G | C | 7   | 5  | --        | --       |
| CakTC03573 | Ca(ICC2/PI489777)SNP_00134 | 770  | A | T | 4   | 3  | --        | --       |
| CakTC41142 | Ca(ICC2/PI489777)SNP_00135 | 532  | A | T | 14  | 11 | --        | --       |
|            | Ca(ICC2/PI489777)SNP_00136 | 540  | T | A | 9   | 12 | --        | --       |
| CakTC43065 | Ca(ICC2/PI489777)SNP_00137 | 874  | T | A | 3   | 4  | --        | --       |
| CakTC32837 | Ca(ICC2/PI489777)SNP_00138 | 171  | C | A | 14  | 7  | --        | --       |
|            | Ca(ICC2/PI489777)SNP_00139 | 368  | G | T | 18  | 14 | --        | --       |
|            | Ca(ICC2/PI489777)SNP_00140 | 1924 | T | C | 9   | 14 | --        | --       |
|            | Ca(ICC2/PI489777)SNP_00141 | 2771 | G | A | 9   | 7  | --        | --       |
| CakTC39358 | Ca(ICC2/PI489777)SNP_00142 | 389  | A | G | 9   | 4  | --        | --       |
|            | Ca(ICC2/PI489777)SNP_00143 | 744  | A | G | 13  | 6  | --        | --       |

|            |                             |      |   |   |    |    |    |       |
|------------|-----------------------------|------|---|---|----|----|----|-------|
|            | Ca(ICCV2/PI489777)SNP_00144 | 1122 | A | G | 13 | 4  | -- | --    |
| CakTC38756 | Ca(ICCV2/PI489777)SNP_00145 | 464  | G | A | 59 | 16 | -- | --    |
|            | Ca(ICCV2/PI489777)SNP_00146 | 1069 | C | T | 38 | 13 | -- | --    |
|            | Ca(ICCV2/PI489777)SNP_00147 | 1262 | C | T | 25 | 11 | -- | --    |
| CakTC38895 | Ca(ICCV2/PI489777)SNP_00148 | 512  | A | C | 34 | 11 | -- | --    |
|            | Ca(ICCV2/PI489777)SNP_00149 | 590  | T | C | 43 | 31 | -- | --    |
|            | Ca(ICCV2/PI489777)SNP_00150 | 818  | T | G | 64 | 47 | -- | --    |
| CakTC29974 | Ca(ICCV2/PI489777)SNP_00151 | 1028 | A | G | 8  | 8  | -- | --    |
|            | Ca(ICCV2/PI489777)SNP_00152 | 1512 | A | G | 14 | 12 | -- | --    |
|            | Ca(ICCV2/PI489777)SNP_00153 | 1779 | T | C | 20 | 16 | -- | --    |
|            | Ca(ICCV2/PI489777)SNP_00154 | 1859 | C | T | 16 | 10 | -- | --    |
|            | Ca(ICCV2/PI489777)SNP_00155 | 2115 | C | T | 20 | 19 | -- | --    |
|            | Ca(ICCV2/PI489777)SNP_00156 | 3843 | C | G | 17 | 13 | -- | --    |
|            | Ca(ICCV2/PI489777)SNP_00157 | 4012 | A | G | 25 | 9  | -- | --    |
|            | Ca(ICCV2/PI489777)SNP_00158 | 4442 | C | T | 21 | 13 | -- | --    |
|            | Ca(ICCV2/PI489777)SNP_00159 | 4815 | A | G | 10 | 9  | -- | --    |
|            | Ca(ICCV2/PI489777)SNP_00160 | 4936 | T | G | 3  | 8  | -- | --    |
|            | Ca(ICCV2/PI489777)SNP_00161 | 5008 | A | T | 4  | 4  | -- | --    |
| CakTC42521 | Ca(ICCV2/PI489777)SNP_00162 | 703  | C | A | 14 | 9  | -- | MYB   |
|            | Ca(ICCV2/PI489777)SNP_00163 | 715  | A | C | 12 | 9  | -- | MYB   |
| CakTC37634 | Ca(ICCV2/PI489777)SNP_00164 | 464  | G | T | 8  | 3  | -- | --    |
|            | Ca(ICCV2/PI489777)SNP_00165 | 815  | G | A | 13 | 11 | -- | --    |
| CakTC09982 | Ca(ICCV2/PI489777)SNP_00166 | 294  | T | C | 7  | 10 | -- | ARR-B |
|            | Ca(ICCV2/PI489777)SNP_00167 | 1004 | T | C | 18 | 8  | -- | ARR-B |
| CakTC26868 | Ca(ICCV2/PI489777)SNP_00168 | 81   | G | T | 5  | 3  | -- | --    |
|            | Ca(ICCV2/PI489777)SNP_00169 | 649  | G | C | 3  | 3  | -- | --    |
|            | Ca(ICCV2/PI489777)SNP_00170 | 682  | C | T | 4  | 5  | -- | --    |
|            | Ca(ICCV2/PI489777)SNP_00171 | 934  | A | G | 6  | 4  | -- | --    |
| CakTC05101 | Ca(ICCV2/PI489777)SNP_00172 | 1431 | T | C | 4  | 8  | -- | --    |
| CakTC29462 | Ca(ICCV2/PI489777)SNP_00173 | 190  | T | G | 23 | 12 | -- | --    |
|            | Ca(ICCV2/PI489777)SNP_00174 | 742  | A | G | 18 | 7  | -- | --    |
|            | Ca(ICCV2/PI489777)SNP_00175 | 760  | G | A | 16 | 7  | -- | --    |
|            | Ca(ICCV2/PI489777)SNP_00176 | 799  | A | T | 24 | 7  | -- | --    |
|            | Ca(ICCV2/PI489777)SNP_00177 | 1060 | A | G | 13 | 5  | -- | --    |
|            | Ca(ICCV2/PI489777)SNP_00178 | 1068 | G | T | 13 | 5  | -- | --    |
| CakTC31984 | Ca(ICCV2/PI489777)SNP_00179 | 1863 | T | C | 16 | 4  | -- | SBP   |
| CakTC28147 | Ca(ICCV2/PI489777)SNP_00180 | 431  | A | T | 6  | 3  | -- | --    |
|            | Ca(ICCV2/PI489777)SNP_00181 | 1325 | C | T | 19 | 5  | -- | --    |
|            | Ca(ICCV2/PI489777)SNP_00182 | 1354 | A | T | 19 | 5  | -- | --    |
|            | Ca(ICCV2/PI489777)SNP_00183 | 1508 | G | A | 7  | 5  | -- | --    |
|            | Ca(ICCV2/PI489777)SNP_00184 | 2208 | A | G | 10 | 6  | -- | --    |
|            | Ca(ICCV2/PI489777)SNP_00185 | 2328 | A | G | 8  | 4  | -- | --    |
| CakTC28495 | Ca(ICCV2/PI489777)SNP_00186 | 180  | C | A | 16 | 7  | -- | --    |
|            | Ca(ICCV2/PI489777)SNP_00187 | 1819 | G | C | 32 | 9  | -- | --    |
|            | Ca(ICCV2/PI489777)SNP_00188 | 2828 | C | T | 25 | 6  | -- | --    |
| CakTC39166 | Ca(ICCV2/PI489777)SNP_00189 | 1377 | A | G | 10 | 3  | -- | --    |
|            | Ca(ICCV2/PI489777)SNP_00190 | 1505 | T | C | 8  | 3  | -- | --    |
| CakTC36184 | Ca(ICCV2/PI489777)SNP_00191 | 3668 | A | T | 11 | 6  | -- | --    |
|            | Ca(ICCV2/PI489777)SNP_00192 | 4364 | G | T | 9  | 4  | -- | --    |
|            | Ca(ICCV2/PI489777)SNP_00193 | 4554 | A | G | 8  | 14 | -- | --    |
|            | Ca(ICCV2/PI489777)SNP_00194 | 4698 | A | T | 17 | 13 | -- | --    |
| CakTC43237 | Ca(ICCV2/PI489777)SNP_00195 | 179  | C | T | 20 | 3  | -- | --    |
|            | Ca(ICCV2/PI489777)SNP_00196 | 182  | T | G | 19 | 4  | -- | --    |
| CakTC29251 | Ca(ICCV2/PI489777)SNP_00197 | 452  | T | G | 12 | 11 | -- | --    |
| CakTC40473 | Ca(ICCV2/PI489777)SNP_00198 | 67   | C | A | 3  | 3  | -- | --    |
|            | Ca(ICCV2/PI489777)SNP_00199 | 193  | T | A | 6  | 3  | -- | --    |
|            | Ca(ICCV2/PI489777)SNP_00200 | 201  | G | C | 7  | 3  | -- | --    |
|            | Ca(ICCV2/PI489777)SNP_00201 | 319  | C | A | 9  | 5  | -- | --    |
|            | Ca(ICCV2/PI489777)SNP_00202 | 1471 | A | G | 7  | 6  | -- | --    |
|            | Ca(ICCV2/PI489777)SNP_00203 | 1759 | C | T | 8  | 9  | -- | --    |
|            | Ca(ICCV2/PI489777)SNP_00204 | 1930 | T | C | 9  | 12 | -- | --    |
| CakTC22816 | Ca(ICCV2/PI489777)SNP_00205 | 51   | T | A | 3  | 8  | -- | --    |
| CakTC23848 | Ca(ICCV2/PI489777)SNP_00206 | 441  | G | T | 4  | 3  | -- | --    |
| CakTC42134 | Ca(ICCV2/PI489777)SNP_00207 | 334  | A | C | 7  | 9  | -- | --    |
|            | Ca(ICCV2/PI489777)SNP_00208 | 642  | T | C | 9  | 7  | -- | --    |
|            | Ca(ICCV2/PI489777)SNP_00209 | 674  | C | T | 9  | 6  | -- | --    |
|            | Ca(ICCV2/PI489777)SNP_00210 | 1475 | G | A | 5  | 9  | -- | --    |
| CakTC27274 | Ca(ICCV2/PI489777)SNP_00211 | 1371 | C | T | 5  | 3  | -- | --    |
| CakTC09500 | Ca(ICCV2/PI489777)SNP_00212 | 84   | C | A | 22 | 14 | -- | --    |
|            | Ca(ICCV2/PI489777)SNP_00213 | 990  | A | T | 20 | 22 | -- | --    |
| CakTC25597 | Ca(ICCV2/PI489777)SNP_00214 | 549  | T | C | 9  | 4  | -- | --    |
|            | Ca(ICCV2/PI489777)SNP_00215 | 614  | G | C | 7  | 3  | -- | --    |
|            | Ca(ICCV2/PI489777)SNP_00216 | 618  | T | A | 7  | 3  | -- | --    |
| CakTC01341 | Ca(ICCV2/PI489777)SNP_00217 | 189  | T | A | 3  | 3  | -- | --    |

|            |                             |      |   |   |     |     |    |           |
|------------|-----------------------------|------|---|---|-----|-----|----|-----------|
| CakTC25988 | Ca(ICCV2/PI489777)SNP_00218 | 215  | T | C | 5   | 4   | -- | --        |
|            | Ca(ICCV2/PI489777)SNP_00219 | 396  | G | C | 5   | 5   | -- | --        |
|            | Ca(ICCV2/PI489777)SNP_00220 | 428  | A | G | 4   | 5   | -- | --        |
|            | Ca(ICCV2/PI489777)SNP_00221 | 470  | C | T | 6   | 5   | -- | --        |
|            | Ca(ICCV2/PI489777)SNP_00222 | 603  | G | A | 7   | 4   | -- | --        |
| CakTC26229 | Ca(ICCV2/PI489777)SNP_00223 | 799  | A | G | 3   | 4   | -- | AB13VP1   |
|            | Ca(ICCV2/PI489777)SNP_00224 | 2171 | C | T | 15  | 3   | -- | AB13VP1   |
|            | Ca(ICCV2/PI489777)SNP_00225 | 2578 | G | C | 8   | 3   | -- | AB13VP1   |
| CakTC37050 | Ca(ICCV2/PI489777)SNP_00226 | 263  | A | G | 5   | 4   | -- | --        |
|            | Ca(ICCV2/PI489777)SNP_00227 | 659  | C | T | 7   | 3   | -- | --        |
|            | Ca(ICCV2/PI489777)SNP_00228 | 1034 | G | A | 7   | 4   | -- | --        |
| CakTC40607 | Ca(ICCV2/PI489777)SNP_00229 | 182  | A | C | 9   | 7   | -- | --        |
|            | Ca(ICCV2/PI489777)SNP_00230 | 205  | C | A | 9   | 5   | -- | --        |
|            | Ca(ICCV2/PI489777)SNP_00231 | 281  | G | T | 12  | 7   | -- | --        |
|            | Ca(ICCV2/PI489777)SNP_00232 | 303  | A | T | 11  | 6   | -- | --        |
|            | Ca(ICCV2/PI489777)SNP_00233 | 798  | A | G | 7   | 4   | -- | --        |
|            | Ca(ICCV2/PI489777)SNP_00234 | 1215 | T | C | 12  | 15  | -- | --        |
|            | Ca(ICCV2/PI489777)SNP_00235 | 1245 | G | A | 10  | 13  | -- | --        |
|            | Ca(ICCV2/PI489777)SNP_00236 | 1380 | A | G | 7   | 13  | -- | --        |
|            | Ca(ICCV2/PI489777)SNP_00237 | 1473 | T | C | 7   | 14  | -- | --        |
| CakTC29020 | Ca(ICCV2/PI489777)SNP_00238 | 142  | C | G | 95  | 61  | -- | AP2-EREBP |
|            | Ca(ICCV2/PI489777)SNP_00239 | 386  | G | A | 109 | 49  | -- | AP2-EREBP |
|            | Ca(ICCV2/PI489777)SNP_00240 | 672  | C | T | 147 | 45  | -- | AP2-EREBP |
|            | Ca(ICCV2/PI489777)SNP_00241 | 726  | A | T | 166 | 64  | -- | AP2-EREBP |
|            | Ca(ICCV2/PI489777)SNP_00242 | 1170 | G | C | 253 | 117 | -- | AP2-EREBP |
|            | Ca(ICCV2/PI489777)SNP_00243 | 1389 | G | C | 88  | 56  | -- | AP2-EREBP |
|            | Ca(ICCV2/PI489777)SNP_00244 | 1520 | T | A | 51  | 49  | -- | AP2-EREBP |
|            | Ca(ICCV2/PI489777)SNP_00245 | 1557 | C | T | 42  | 39  | -- | AP2-EREBP |
|            | Ca(ICCV2/PI489777)SNP_00246 | 1671 | T | G | 23  | 23  | -- | AP2-EREBP |
| CakTC41239 | Ca(ICCV2/PI489777)SNP_00247 | 134  | G | A | 8   | 4   | -- | --        |
|            | Ca(ICCV2/PI489777)SNP_00248 | 265  | C | T | 8   | 7   | -- | --        |
|            | Ca(ICCV2/PI489777)SNP_00249 | 298  | A | T | 9   | 8   | -- | --        |
|            | Ca(ICCV2/PI489777)SNP_00250 | 364  | C | T | 10  | 8   | -- | --        |
|            | Ca(ICCV2/PI489777)SNP_00251 | 712  | G | C | 10  | 12  | -- | --        |
|            | Ca(ICCV2/PI489777)SNP_00252 | 799  | G | A | 10  | 14  | -- | --        |
|            | Ca(ICCV2/PI489777)SNP_00253 | 898  | T | C | 13  | 14  | -- | --        |
|            | Ca(ICCV2/PI489777)SNP_00254 | 1216 | G | A | 19  | 20  | -- | --        |
|            | Ca(ICCV2/PI489777)SNP_00255 | 1843 | C | T | 6   | 4   | -- | --        |
|            | Ca(ICCV2/PI489777)SNP_00256 | 1945 | T | C | 4   | 7   | -- | --        |
|            | Ca(ICCV2/PI489777)SNP_00257 | 2012 | A | C | 7   | 6   | -- | --        |
|            | Ca(ICCV2/PI489777)SNP_00258 | 2377 | T | C | 13  | 8   | -- | --        |
|            | Ca(ICCV2/PI489777)SNP_00259 | 2428 | T | A | 8   | 5   | -- | --        |
|            | Ca(ICCV2/PI489777)SNP_00260 | 2472 | G | A | 9   | 3   | -- | --        |
| CakTC08612 | Ca(ICCV2/PI489777)SNP_00261 | 2843 | T | C | 4   | 5   | -- | --        |
| CakTC38885 | Ca(ICCV2/PI489777)SNP_00262 | 227  | T | C | 3   | 4   | -- | --        |
|            | Ca(ICCV2/PI489777)SNP_00263 | 800  | T | C | 6   | 9   | -- | --        |
|            | Ca(ICCV2/PI489777)SNP_00264 | 804  | G | C | 6   | 9   | -- | --        |
| CakTC35774 | Ca(ICCV2/PI489777)SNP_00265 | 388  | C | T | 4   | 19  | -- | --        |
|            | Ca(ICCV2/PI489777)SNP_00266 | 794  | A | T | 4   | 10  | -- | --        |
| CakTC39521 | Ca(ICCV2/PI489777)SNP_00267 | 35   | A | T | 4   | 5   | -- | --        |
| CakTC39885 | Ca(ICCV2/PI489777)SNP_00268 | 252  | G | T | 49  | 32  | -- | --        |
|            | Ca(ICCV2/PI489777)SNP_00269 | 316  | A | G | 57  | 48  | -- | --        |
| CakTC40943 | Ca(ICCV2/PI489777)SNP_00270 | 851  | G | T | 9   | 4   | -- | --        |
| CakTC38215 | Ca(ICCV2/PI489777)SNP_00271 | 44   | A | C | 3   | 5   | -- | --        |
|            | Ca(ICCV2/PI489777)SNP_00272 | 245  | G | T | 6   | 7   | -- | --        |
|            | Ca(ICCV2/PI489777)SNP_00273 | 479  | G | A | 7   | 3   | -- | --        |
|            | Ca(ICCV2/PI489777)SNP_00274 | 596  | C | T | 6   | 5   | -- | --        |
| CakTC33094 | Ca(ICCV2/PI489777)SNP_00275 | 691  | C | A | 13  | 14  | -- | --        |
| CakTC36872 | Ca(ICCV2/PI489777)SNP_00276 | 157  | C | G | 25  | 6   | -- | --        |
|            | Ca(ICCV2/PI489777)SNP_00277 | 159  | T | A | 20  | 6   | -- | --        |
| CakTC33548 | Ca(ICCV2/PI489777)SNP_00278 | 418  | G | A | 8   | 12  | -- | --        |
|            | Ca(ICCV2/PI489777)SNP_00279 | 1091 | A | C | 10  | 7   | -- | --        |
| CakTC41073 | Ca(ICCV2/PI489777)SNP_00280 | 61   | T | G | 3   | 4   | -- | --        |
|            | Ca(ICCV2/PI489777)SNP_00281 | 470  | A | C | 12  | 9   | -- | --        |
|            | Ca(ICCV2/PI489777)SNP_00282 | 2060 | G | A | 27  | 14  | -- | --        |
|            | Ca(ICCV2/PI489777)SNP_00283 | 2299 | G | A | 15  | 7   | -- | --        |
| CakTC42228 | Ca(ICCV2/PI489777)SNP_00284 | 257  | T | C | 21  | 19  | -- | LIM       |
|            | Ca(ICCV2/PI489777)SNP_00285 | 295  | C | A | 27  | 22  | -- | LIM       |
| CakTC41813 | Ca(ICCV2/PI489777)SNP_00286 | 509  | C | A | 9   | 4   | -- | bHLH      |
| CakTC38274 | Ca(ICCV2/PI489777)SNP_00287 | 1918 | T | C | 3   | 4   | -- | --        |
|            | Ca(ICCV2/PI489777)SNP_00288 | 3964 | A | G | 6   | 5   | -- | --        |
| CakTC22327 | Ca(ICCV2/PI489777)SNP_00289 | 333  | G | A | 296 | 107 | -- | --        |
| CakTC26901 | Ca(ICCV2/PI489777)SNP_00290 | 292  | G | T | 23  | 4   | -- | --        |
|            | Ca(ICCV2/PI489777)SNP_00291 | 373  | G | C | 32  | 6   | -- | --        |

|            |                            |      |   |   |     |    |        |      |
|------------|----------------------------|------|---|---|-----|----|--------|------|
|            | Ca(ICC2/PI489777)SNP_00292 | 850  | C | T | 34  | 5  | --     | --   |
|            | Ca(ICC2/PI489777)SNP_00293 | 1096 | G | T | 23  | 5  | --     | --   |
| CakTC37697 | Ca(ICC2/PI489777)SNP_00294 | 315  | C | G | 10  | 5  | --     | --   |
| CakTC35927 | Ca(ICC2/PI489777)SNP_00295 | 403  | G | T | 5   | 5  | --     | --   |
| CakTC34611 | Ca(ICC2/PI489777)SNP_00296 | 1365 | T | A | 3   | 7  | --     | --   |
| CakTC40777 | Ca(ICC2/PI489777)SNP_00297 | 274  | C | A | 4   | 3  | --     | --   |
|            | Ca(ICC2/PI489777)SNP_00298 | 624  | C | A | 3   | 3  | --     | --   |
| CakTC25952 | Ca(ICC2/PI489777)SNP_00299 | 661  | C | G | 4   | 3  | --     | --   |
|            | Ca(ICC2/PI489777)SNP_00300 | 1150 | A | C | 4   | 7  | --     | --   |
|            | Ca(ICC2/PI489777)SNP_00301 | 1362 | C | T | 3   | 4  | --     | --   |
| CakTC43249 | Ca(ICC2/PI489777)SNP_00302 | 267  | C | T | 9   | 6  | --     | --   |
|            | Ca(ICC2/PI489777)SNP_00303 | 497  | G | A | 12  | 9  | --     | --   |
| CakTC36244 | Ca(ICC2/PI489777)SNP_00304 | 2907 | C | A | 19  | 11 | --     | --   |
| CakTC42986 | Ca(ICC2/PI489777)SNP_00305 | 144  | T | C | 3   | 9  | --     | --   |
| CakTC42727 | Ca(ICC2/PI489777)SNP_00306 | 252  | C | T | 11  | 6  | --     | --   |
|            | Ca(ICC2/PI489777)SNP_00307 | 332  | A | G | 14  | 9  | --     | --   |
|            | Ca(ICC2/PI489777)SNP_00308 | 334  | T | C | 14  | 9  | --     | --   |
|            | Ca(ICC2/PI489777)SNP_00309 | 976  | C | G | 10  | 9  | --     | --   |
|            | Ca(ICC2/PI489777)SNP_00310 | 1181 | A | G | 5   | 6  | --     | --   |
|            | Ca(ICC2/PI489777)SNP_00311 | 1372 | G | T | 8   | 12 | --     | --   |
|            | Ca(ICC2/PI489777)SNP_00312 | 1564 | G | A | 6   | 11 | --     | --   |
|            | Ca(ICC2/PI489777)SNP_00313 | 1574 | C | T | 6   | 11 | --     | --   |
| CakTC33354 | Ca(ICC2/PI489777)SNP_00314 | 238  | G | A | 38  | 15 | --     | --   |
|            | Ca(ICC2/PI489777)SNP_00315 | 673  | C | T | 56  | 20 | --     | --   |
|            | Ca(ICC2/PI489777)SNP_00316 | 873  | C | T | 37  | 11 | --     | --   |
|            | Ca(ICC2/PI489777)SNP_00317 | 1648 | G | A | 73  | 23 | --     | --   |
|            | Ca(ICC2/PI489777)SNP_00318 | 1867 | C | T | 70  | 28 | --     | --   |
|            | Ca(ICC2/PI489777)SNP_00319 | 1870 | T | G | 61  | 29 | --     | --   |
| CakTC27620 | Ca(ICC2/PI489777)SNP_00320 | 390  | G | T | 10  | 3  | --     | --   |
|            | Ca(ICC2/PI489777)SNP_00321 | 402  | G | C | 11  | 4  | --     | --   |
|            | Ca(ICC2/PI489777)SNP_00322 | 576  | C | A | 15  | 5  | --     | --   |
|            | Ca(ICC2/PI489777)SNP_00323 | 644  | G | A | 11  | 4  | --     | --   |
|            | Ca(ICC2/PI489777)SNP_00324 | 747  | A | G | 19  | 3  | --     | --   |
|            | Ca(ICC2/PI489777)SNP_00325 | 912  | A | G | 21  | 3  | --     | --   |
|            | Ca(ICC2/PI489777)SNP_00326 | 1179 | C | T | 26  | 5  | --     | --   |
|            | Ca(ICC2/PI489777)SNP_00327 | 2164 | G | A | 8   | 6  | --     | --   |
| CakTC40501 | Ca(ICC2/PI489777)SNP_00328 | 361  | C | G | 18  | 12 | --     | --   |
|            | Ca(ICC2/PI489777)SNP_00329 | 534  | T | C | 13  | 10 | --     | --   |
|            | Ca(ICC2/PI489777)SNP_00330 | 547  | C | A | 13  | 11 | --     | --   |
|            | Ca(ICC2/PI489777)SNP_00331 | 591  | G | A | 17  | 17 | --     | --   |
|            | Ca(ICC2/PI489777)SNP_00332 | 747  | G | A | 12  | 10 | --     | --   |
|            | Ca(ICC2/PI489777)SNP_00333 | 816  | C | A | 13  | 7  | --     | --   |
|            | Ca(ICC2/PI489777)SNP_00334 | 1218 | A | G | 11  | 6  | --     | --   |
|            | Ca(ICC2/PI489777)SNP_00335 | 1810 | C | T | 9   | 7  | --     | --   |
| CakTC38684 | Ca(ICC2/PI489777)SNP_00336 | 238  | T | C | 17  | 13 | --     | --   |
| CakTC26792 | Ca(ICC2/PI489777)SNP_00337 | 537  | T | C | 129 | 57 | --     | --   |
|            | Ca(ICC2/PI489777)SNP_00338 | 741  | G | C | 95  | 56 | --     | --   |
|            | Ca(ICC2/PI489777)SNP_00339 | 804  | A | G | 94  | 44 | --     | --   |
| CakTC30350 | Ca(ICC2/PI489777)SNP_00340 | 95   | A | T | 4   | 5  | Flower | bud  |
|            | Ca(ICC2/PI489777)SNP_00341 | 107  | T | C | 5   | 5  | Flower | bud  |
| CakTC39287 | Ca(ICC2/PI489777)SNP_00342 | 389  | C | T | 11  | 4  | --     | --   |
|            | Ca(ICC2/PI489777)SNP_00343 | 876  | T | A | 26  | 8  | --     | --   |
| CakTC30035 | Ca(ICC2/PI489777)SNP_00344 | 324  | C | T | 11  | 8  | --     | --   |
|            | Ca(ICC2/PI489777)SNP_00345 | 918  | C | A | 10  | 3  | --     | --   |
|            | Ca(ICC2/PI489777)SNP_00346 | 1151 | G | T | 9   | 11 | --     | --   |
| CakTC27443 | Ca(ICC2/PI489777)SNP_00347 | 330  | T | C | 9   | 4  | --     | --   |
| CakTC35067 | Ca(ICC2/PI489777)SNP_00348 | 120  | G | A | 3   | 3  | --     | --   |
| CakTC27942 | Ca(ICC2/PI489777)SNP_00349 | 1087 | A | G | 8   | 4  | --     | WRKY |
| CakTC11673 | Ca(ICC2/PI489777)SNP_00350 | 2499 | C | T | 4   | 4  | --     | --   |
|            | Ca(ICC2/PI489777)SNP_00351 | 2885 | G | A | 5   | 5  | --     | --   |
| CakTC33125 | Ca(ICC2/PI489777)SNP_00352 | 105  | A | T | 15  | 10 | --     | --   |
|            | Ca(ICC2/PI489777)SNP_00353 | 124  | G | A | 18  | 10 | --     | --   |
|            | Ca(ICC2/PI489777)SNP_00354 | 437  | A | T | 50  | 18 | --     | --   |
|            | Ca(ICC2/PI489777)SNP_00355 | 914  | C | T | 42  | 14 | --     | --   |
|            | Ca(ICC2/PI489777)SNP_00356 | 1028 | A | C | 55  | 12 | --     | --   |
|            | Ca(ICC2/PI489777)SNP_00357 | 1154 | C | T | 40  | 12 | --     | --   |
|            | Ca(ICC2/PI489777)SNP_00358 | 1544 | T | G | 39  | 23 | --     | --   |
|            | Ca(ICC2/PI489777)SNP_00359 | 1672 | G | C | 37  | 22 | --     | --   |
|            | Ca(ICC2/PI489777)SNP_00360 | 1899 | T | A | 9   | 6  | --     | --   |
|            | Ca(ICC2/PI489777)SNP_00361 | 1949 | T | C | 5   | 4  | --     | --   |
| CakTC30077 | Ca(ICC2/PI489777)SNP_00362 | 369  | G | A | 11  | 5  | --     | --   |
|            | Ca(ICC2/PI489777)SNP_00363 | 501  | A | G | 11  | 5  | --     | --   |
|            | Ca(ICC2/PI489777)SNP_00364 | 2614 | A | G | 5   | 3  | --     | --   |
|            | Ca(ICC2/PI489777)SNP_00365 | 2620 | A | G | 5   | 3  | --     | --   |

|            |                            |      |   |   |     |    |        |     |
|------------|----------------------------|------|---|---|-----|----|--------|-----|
|            | Ca(ICC2/PI489777)SNP_00366 | 3074 | T | G | 6   | 5  | --     | --  |
|            | Ca(ICC2/PI489777)SNP_00367 | 3152 | C | G | 5   | 4  | --     | --  |
|            | Ca(ICC2/PI489777)SNP_00368 | 3162 | A | C | 3   | 4  | --     | --  |
| CakTC04000 | Ca(ICC2/PI489777)SNP_00369 | 510  | C | T | 100 | 73 | --     | --  |
| CakTC26626 | Ca(ICC2/PI489777)SNP_00370 | 517  | A | G | 11  | 3  | --     | --  |
| CakTC33435 | Ca(ICC2/PI489777)SNP_00371 | 304  | C | T | 33  | 4  | --     | --  |
|            | Ca(ICC2/PI489777)SNP_00372 | 322  | A | G | 35  | 5  | --     | --  |
| CakTC35120 | Ca(ICC2/PI489777)SNP_00373 | 351  | A | T | 3   | 3  | Flower | bud |
| CakTC10206 | Ca(ICC2/PI489777)SNP_00374 | 282  | T | A | 7   | 3  | --     | --  |
| CakTC37718 | Ca(ICC2/PI489777)SNP_00375 | 198  | T | C | 5   | 6  | --     | --  |
|            | Ca(ICC2/PI489777)SNP_00376 | 318  | G | A | 4   | 6  | --     | --  |
|            | Ca(ICC2/PI489777)SNP_00377 | 350  | C | T | 6   | 6  | --     | --  |
|            | Ca(ICC2/PI489777)SNP_00378 | 374  | C | T | 6   | 8  | --     | --  |
|            | Ca(ICC2/PI489777)SNP_00379 | 434  | C | T | 5   | 8  | --     | --  |
|            | Ca(ICC2/PI489777)SNP_00380 | 506  | A | G | 6   | 5  | --     | --  |
|            | Ca(ICC2/PI489777)SNP_00381 | 521  | T | C | 6   | 5  | --     | --  |
|            | Ca(ICC2/PI489777)SNP_00382 | 1313 | T | G | 5   | 5  | --     | --  |
| CakTC26404 | Ca(ICC2/PI489777)SNP_00383 | 1230 | G | T | 4   | 3  | --     | --  |
| CakTC10811 | Ca(ICC2/PI489777)SNP_00384 | 480  | T | C | 19  | 16 | --     | --  |
|            | Ca(ICC2/PI489777)SNP_00385 | 513  | A | G | 17  | 15 | --     | --  |
| CakTC40265 | Ca(ICC2/PI489777)SNP_00386 | 1250 | G | A | 5   | 3  | --     | --  |
|            | Ca(ICC2/PI489777)SNP_00387 | 1329 | T | C | 6   | 3  | --     | --  |
|            | Ca(ICC2/PI489777)SNP_00388 | 1694 | A | G | 7   | 3  | --     | --  |
|            | Ca(ICC2/PI489777)SNP_00389 | 1879 | T | G | 10  | 3  | --     | --  |
|            | Ca(ICC2/PI489777)SNP_00390 | 1949 | A | G | 11  | 3  | --     | --  |
|            | Ca(ICC2/PI489777)SNP_00391 | 1953 | T | C | 11  | 3  | --     | --  |
| CakTC34762 | Ca(ICC2/PI489777)SNP_00392 | 354  | A | G | 7   | 6  | --     | --  |
|            | Ca(ICC2/PI489777)SNP_00393 | 532  | G | A | 6   | 7  | --     | --  |
|            | Ca(ICC2/PI489777)SNP_00394 | 2726 | T | C | 11  | 7  | --     | --  |
|            | Ca(ICC2/PI489777)SNP_00395 | 3468 | G | A | 4   | 4  | --     | --  |
|            | Ca(ICC2/PI489777)SNP_00396 | 3492 | T | C | 4   | 4  | --     | --  |
| CakTC41912 | Ca(ICC2/PI489777)SNP_00397 | 240  | A | T | 10  | 5  | --     | --  |
|            | Ca(ICC2/PI489777)SNP_00398 | 241  | A | T | 10  | 5  | --     | --  |
|            | Ca(ICC2/PI489777)SNP_00399 | 263  | T | G | 12  | 8  | --     | --  |
|            | Ca(ICC2/PI489777)SNP_00400 | 615  | A | G | 47  | 41 | --     | --  |
|            | Ca(ICC2/PI489777)SNP_00401 | 678  | A | C | 52  | 44 | --     | --  |
|            | Ca(ICC2/PI489777)SNP_00402 | 708  | G | A | 59  | 52 | --     | --  |
|            | Ca(ICC2/PI489777)SNP_00403 | 1494 | C | T | 54  | 37 | --     | --  |
|            | Ca(ICC2/PI489777)SNP_00404 | 1797 | G | A | 18  | 11 | --     | --  |
| CakTC43305 | Ca(ICC2/PI489777)SNP_00405 | 628  | A | G | 11  | 4  | --     | --  |
| CakTC39982 | Ca(ICC2/PI489777)SNP_00406 | 766  | A | G | 5   | 3  | --     | --  |
| CakTC37199 | Ca(ICC2/PI489777)SNP_00407 | 195  | A | T | 4   | 4  | --     | --  |
|            | Ca(ICC2/PI489777)SNP_00408 | 380  | C | T | 12  | 7  | --     | --  |
|            | Ca(ICC2/PI489777)SNP_00409 | 384  | G | T | 14  | 7  | --     | --  |
|            | Ca(ICC2/PI489777)SNP_00410 | 759  | C | T | 32  | 18 | --     | --  |
|            | Ca(ICC2/PI489777)SNP_00411 | 828  | A | T | 30  | 16 | --     | --  |
|            | Ca(ICC2/PI489777)SNP_00412 | 933  | T | C | 23  | 15 | --     | --  |
| CakTC29903 | Ca(ICC2/PI489777)SNP_00413 | 340  | T | C | 5   | 5  | --     | --  |
|            | Ca(ICC2/PI489777)SNP_00414 | 701  | A | T | 17  | 6  | --     | --  |
|            | Ca(ICC2/PI489777)SNP_00415 | 709  | C | G | 19  | 6  | --     | --  |
| CakTC35877 | Ca(ICC2/PI489777)SNP_00416 | 1280 | C | T | 12  | 6  | --     | --  |
| CakTC35083 | Ca(ICC2/PI489777)SNP_00417 | 1097 | C | G | 30  | 17 | --     | TPR |
|            | Ca(ICC2/PI489777)SNP_00418 | 1124 | C | A | 31  | 20 | --     | TPR |
|            | Ca(ICC2/PI489777)SNP_00419 | 2817 | C | A | 19  | 6  | --     | TPR |
| CakTC32345 | Ca(ICC2/PI489777)SNP_00420 | 1244 | T | C | 10  | 12 | --     | --  |
| CakTC38929 | Ca(ICC2/PI489777)SNP_00421 | 315  | A | G | 4   | 12 | --     | --  |
|            | Ca(ICC2/PI489777)SNP_00422 | 464  | C | G | 6   | 13 | --     | --  |
|            | Ca(ICC2/PI489777)SNP_00423 | 489  | T | C | 6   | 12 | --     | --  |
|            | Ca(ICC2/PI489777)SNP_00424 | 666  | T | A | 9   | 22 | --     | --  |
|            | Ca(ICC2/PI489777)SNP_00425 | 1001 | A | C | 5   | 8  | --     | --  |
| CakTC35701 | Ca(ICC2/PI489777)SNP_00426 | 103  | G | T | 8   | 8  | --     | --  |
|            | Ca(ICC2/PI489777)SNP_00427 | 153  | T | C | 8   | 6  | --     | --  |
|            | Ca(ICC2/PI489777)SNP_00428 | 1323 | C | A | 10  | 9  | --     | --  |
|            | Ca(ICC2/PI489777)SNP_00429 | 1726 | C | A | 11  | 7  | --     | --  |
|            | Ca(ICC2/PI489777)SNP_00430 | 2820 | T | C | 16  | 12 | --     | --  |
|            | Ca(ICC2/PI489777)SNP_00431 | 3096 | G | A | 25  | 14 | --     | --  |
|            | Ca(ICC2/PI489777)SNP_00432 | 3221 | G | C | 22  | 12 | --     | --  |
|            | Ca(ICC2/PI489777)SNP_00433 | 3247 | T | A | 22  | 14 | --     | --  |
|            | Ca(ICC2/PI489777)SNP_00434 | 3429 | C | A | 8   | 10 | --     | --  |
|            | Ca(ICC2/PI489777)SNP_00435 | 3471 | A | T | 8   | 8  | --     | --  |
|            | Ca(ICC2/PI489777)SNP_00436 | 3476 | G | A | 7   | 9  | --     | --  |
|            | Ca(ICC2/PI489777)SNP_00437 | 3517 | A | T | 6   | 6  | --     | --  |
|            | Ca(ICC2/PI489777)SNP_00438 | 3683 | C | T | 4   | 11 | --     | --  |
|            | Ca(ICC2/PI489777)SNP_00439 | 3684 | T | A | 4   | 11 | --     | --  |

|            |                            |      |   |   |     |    |       |    |
|------------|----------------------------|------|---|---|-----|----|-------|----|
| CakTC26269 | Ca(ICC2/PI489777)SNP_00440 | 1806 | A | G | 7   | 11 | --    | -- |
| CakTC24500 | Ca(ICC2/PI489777)SNP_00441 | 1264 | T | A | 3   | 4  | --    | -- |
| CakTC35131 | Ca(ICC2/PI489777)SNP_00442 | 378  | C | T | 8   | 4  | --    | -- |
|            | Ca(ICC2/PI489777)SNP_00443 | 1299 | A | G | 3   | 6  | --    | -- |
|            | Ca(ICC2/PI489777)SNP_00444 | 1688 | T | C | 5   | 4  | --    | -- |
|            | Ca(ICC2/PI489777)SNP_00445 | 1784 | T | C | 5   | 7  | --    | -- |
|            | Ca(ICC2/PI489777)SNP_00446 | 1973 | G | C | 6   | 7  | --    | -- |
|            | Ca(ICC2/PI489777)SNP_00447 | 1997 | T | G | 5   | 7  | --    | -- |
|            | Ca(ICC2/PI489777)SNP_00448 | 2491 | G | A | 8   | 5  | --    | -- |
|            | Ca(ICC2/PI489777)SNP_00449 | 3104 | G | A | 10  | 16 | --    | -- |
| CakTC02106 | Ca(ICC2/PI489777)SNP_00450 | 363  | T | C | 4   | 3  | --    | -- |
|            | Ca(ICC2/PI489777)SNP_00451 | 930  | T | C | 3   | 3  | --    | -- |
| CakTC43294 | Ca(ICC2/PI489777)SNP_00452 | 683  | G | A | 3   | 3  | --    | -- |
|            | Ca(ICC2/PI489777)SNP_00453 | 1448 | T | C | 8   | 3  | --    | -- |
|            | Ca(ICC2/PI489777)SNP_00454 | 1450 | G | A | 8   | 3  | --    | -- |
| CakTC11417 | Ca(ICC2/PI489777)SNP_00455 | 1033 | A | T | 30  | 23 | --    | -- |
| CakTC37491 | Ca(ICC2/PI489777)SNP_00456 | 801  | T | G | 14  | 6  | --    | -- |
|            | Ca(ICC2/PI489777)SNP_00457 | 852  | C | T | 17  | 7  | --    | -- |
|            | Ca(ICC2/PI489777)SNP_00458 | 867  | C | T | 16  | 7  | --    | -- |
|            | Ca(ICC2/PI489777)SNP_00459 | 1000 | A | G | 15  | 6  | --    | -- |
| CakTC43267 | Ca(ICC2/PI489777)SNP_00460 | 775  | G | A | 15  | 11 | --    | -- |
|            | Ca(ICC2/PI489777)SNP_00461 | 860  | T | A | 11  | 3  | --    | -- |
|            | Ca(ICC2/PI489777)SNP_00462 | 887  | A | T | 14  | 3  | --    | -- |
| CakTC39952 | Ca(ICC2/PI489777)SNP_00463 | 172  | C | T | 77  | 32 | --    | -- |
|            | Ca(ICC2/PI489777)SNP_00464 | 186  | T | C | 92  | 34 | --    | -- |
|            | Ca(ICC2/PI489777)SNP_00465 | 252  | G | T | 104 | 35 | --    | -- |
|            | Ca(ICC2/PI489777)SNP_00466 | 256  | A | G | 103 | 34 | --    | -- |
|            | Ca(ICC2/PI489777)SNP_00467 | 408  | G | A | 108 | 26 | --    | -- |
|            | Ca(ICC2/PI489777)SNP_00468 | 686  | T | C | 85  | 37 | --    | -- |
|            | Ca(ICC2/PI489777)SNP_00469 | 1078 | A | G | 144 | 52 | --    | -- |
|            | Ca(ICC2/PI489777)SNP_00470 | 1210 | T | C | 81  | 28 | --    | -- |
| CakTC42704 | Ca(ICC2/PI489777)SNP_00471 | 489  | C | T | 23  | 8  | --    | -- |
|            | Ca(ICC2/PI489777)SNP_00472 | 663  | A | G | 27  | 7  | --    | -- |
|            | Ca(ICC2/PI489777)SNP_00473 | 1305 | A | C | 16  | 5  | --    | -- |
|            | Ca(ICC2/PI489777)SNP_00474 | 1416 | T | A | 15  | 9  | --    | -- |
|            | Ca(ICC2/PI489777)SNP_00475 | 1525 | A | G | 13  | 8  | --    | -- |
|            | Ca(ICC2/PI489777)SNP_00476 | 1539 | C | T | 10  | 5  | --    | -- |
| CakTC27054 | Ca(ICC2/PI489777)SNP_00477 | 617  | T | C | 37  | 18 | --    | -- |
| CakTC23799 | Ca(ICC2/PI489777)SNP_00478 | 898  | C | T | 12  | 13 | --    | -- |
| CakTC37682 | Ca(ICC2/PI489777)SNP_00479 | 270  | C | A | 4   | 6  | --    | -- |
|            | Ca(ICC2/PI489777)SNP_00480 | 365  | T | C | 3   | 8  | --    | -- |
|            | Ca(ICC2/PI489777)SNP_00481 | 592  | T | G | 9   | 10 | --    | -- |
|            | Ca(ICC2/PI489777)SNP_00482 | 893  | A | G | 14  | 7  | --    | -- |
|            | Ca(ICC2/PI489777)SNP_00483 | 905  | G | A | 11  | 7  | --    | -- |
|            | Ca(ICC2/PI489777)SNP_00484 | 1155 | T | C | 10  | 15 | --    | -- |
|            | Ca(ICC2/PI489777)SNP_00485 | 1337 | T | G | 13  | 21 | --    | -- |
|            | Ca(ICC2/PI489777)SNP_00486 | 1366 | C | T | 14  | 25 | --    | -- |
|            | Ca(ICC2/PI489777)SNP_00487 | 1394 | T | A | 8   | 23 | --    | -- |
|            | Ca(ICC2/PI489777)SNP_00488 | 1507 | T | C | 11  | 27 | --    | -- |
| CakTC38208 | Ca(ICC2/PI489777)SNP_00489 | 20   | T | C | 10  | 4  | --    | -- |
|            | Ca(ICC2/PI489777)SNP_00490 | 31   | A | T | 22  | 7  | --    | -- |
|            | Ca(ICC2/PI489777)SNP_00491 | 867  | A | C | 10  | 21 | --    | -- |
|            | Ca(ICC2/PI489777)SNP_00492 | 944  | G | T | 7   | 15 | --    | -- |
| CakTC33775 | Ca(ICC2/PI489777)SNP_00493 | 1095 | G | A | 7   | 7  | --    | -- |
| CakTC31729 | Ca(ICC2/PI489777)SNP_00494 | 1268 | C | T | 9   | 6  | --    | -- |
|            | Ca(ICC2/PI489777)SNP_00495 | 1424 | A | C | 9   | 4  | --    | -- |
|            | Ca(ICC2/PI489777)SNP_00496 | 1770 | G | A | 7   | 9  | --    | -- |
| CakTC33818 | Ca(ICC2/PI489777)SNP_00497 | 63   | A | G | 12  | 4  | Shoot | -- |
|            | Ca(ICC2/PI489777)SNP_00498 | 81   | G | T | 12  | 8  | Shoot | -- |
| CakTC25970 | Ca(ICC2/PI489777)SNP_00499 | 149  | A | G | 17  | 17 | --    | -- |
|            | Ca(ICC2/PI489777)SNP_00500 | 209  | A | G | 16  | 20 | --    | -- |
|            | Ca(ICC2/PI489777)SNP_00501 | 248  | C | T | 25  | 27 | --    | -- |
|            | Ca(ICC2/PI489777)SNP_00502 | 278  | G | A | 26  | 33 | --    | -- |
|            | Ca(ICC2/PI489777)SNP_00503 | 791  | A | G | 94  | 35 | --    | -- |
|            | Ca(ICC2/PI489777)SNP_00504 | 929  | A | T | 86  | 63 | --    | -- |
|            | Ca(ICC2/PI489777)SNP_00505 | 953  | T | A | 88  | 61 | --    | -- |
|            | Ca(ICC2/PI489777)SNP_00506 | 959  | G | A | 88  | 62 | --    | -- |
|            | Ca(ICC2/PI489777)SNP_00507 | 981  | T | C | 78  | 59 | --    | -- |
|            | Ca(ICC2/PI489777)SNP_00508 | 1028 | G | C | 70  | 53 | --    | -- |
|            | Ca(ICC2/PI489777)SNP_00509 | 1040 | G | A | 80  | 53 | --    | -- |
|            | Ca(ICC2/PI489777)SNP_00510 | 1774 | T | G | 9   | 4  | --    | -- |
| CakTC40043 | Ca(ICC2/PI489777)SNP_00511 | 112  | A | G | 15  | 5  | --    | -- |
|            | Ca(ICC2/PI489777)SNP_00512 | 513  | A | G | 16  | 13 | --    | -- |
|            | Ca(ICC2/PI489777)SNP_00513 | 761  | T | G | 9   | 5  | --    | -- |

|            |                            |       |   |   |     |     |           |         |
|------------|----------------------------|-------|---|---|-----|-----|-----------|---------|
|            | Ca(ICC2/PI489777)SNP_00514 | 1018  | C | G | 7   | 3   | --        | --      |
| CakTC41708 | Ca(ICC2/PI489777)SNP_00515 | 466   | T | A | 101 | 168 | --        | --      |
|            | Ca(ICC2/PI489777)SNP_00516 | 693   | G | A | 7   | 15  | --        | --      |
| CakTC31296 | Ca(ICC2/PI489777)SNP_00517 | 559   | A | G | 17  | 9   | --        | --      |
|            | Ca(ICC2/PI489777)SNP_00518 | 1525  | G | A | 43  | 10  | --        | --      |
| CakTC34005 | Ca(ICC2/PI489777)SNP_00519 | 2225  | A | G | 4   | 4   | --        | --      |
|            | Ca(ICC2/PI489777)SNP_00520 | 8516  | T | C | 6   | 5   | --        | --      |
|            | Ca(ICC2/PI489777)SNP_00521 | 8792  | C | T | 6   | 4   | --        | --      |
|            | Ca(ICC2/PI489777)SNP_00522 | 10603 | A | G | 7   | 7   | --        | --      |
|            | Ca(ICC2/PI489777)SNP_00523 | 11522 | G | A | 10  | 9   | --        | --      |
|            | Ca(ICC2/PI489777)SNP_00524 | 11665 | C | T | 7   | 6   | --        | --      |
| CakTC27203 | Ca(ICC2/PI489777)SNP_00525 | 1740  | C | A | 3   | 3   | --        | --      |
| CakTC31698 | Ca(ICC2/PI489777)SNP_00526 | 55    | G | A | 3   | 3   | Flower    | bud     |
|            | Ca(ICC2/PI489777)SNP_00527 | 103   | C | G | 4   | 4   | Flower    | bud     |
| CakTC09306 | Ca(ICC2/PI489777)SNP_00528 | 539   | G | A | 21  | 7   | --        | CCHC    |
|            | Ca(ICC2/PI489777)SNP_00529 | 564   | T | G | 24  | 4   | --        | CCHC    |
|            | Ca(ICC2/PI489777)SNP_00530 | 2867  | A | C | 9   | 6   | --        | CCHC    |
|            | Ca(ICC2/PI489777)SNP_00531 | 2872  | A | G | 10  | 6   | --        | CCHC    |
|            | Ca(ICC2/PI489777)SNP_00532 | 3370  | A | G | 6   | 3   | --        | CCHC    |
|            | Ca(ICC2/PI489777)SNP_00533 | 3419  | C | T | 6   | 3   | --        | CCHC    |
| CakTC29135 | Ca(ICC2/PI489777)SNP_00534 | 618   | C | A | 8   | 3   | --        | --      |
|            | Ca(ICC2/PI489777)SNP_00535 | 1437  | C | T | 7   | 4   | --        | --      |
|            | Ca(ICC2/PI489777)SNP_00536 | 1776  | C | T | 3   | 8   | --        | --      |
|            | Ca(ICC2/PI489777)SNP_00537 | 2275  | A | G | 3   | 4   | --        | --      |
| CakTC38335 | Ca(ICC2/PI489777)SNP_00538 | 444   | T | C | 5   | 15  | --        | --      |
|            | Ca(ICC2/PI489777)SNP_00539 | 605   | G | A | 7   | 7   | --        | --      |
|            | Ca(ICC2/PI489777)SNP_00540 | 619   | G | A | 9   | 6   | --        | --      |
|            | Ca(ICC2/PI489777)SNP_00541 | 759   | G | A | 12  | 5   | --        | --      |
|            | Ca(ICC2/PI489777)SNP_00542 | 1104  | T | G | 19  | 5   | --        | --      |
|            | Ca(ICC2/PI489777)SNP_00543 | 1179  | A | G | 15  | 5   | --        | --      |
|            | Ca(ICC2/PI489777)SNP_00544 | 1285  | G | T | 17  | 5   | --        | --      |
|            | Ca(ICC2/PI489777)SNP_00545 | 1323  | A | G | 10  | 4   | --        | --      |
|            | Ca(ICC2/PI489777)SNP_00546 | 1326  | A | C | 10  | 4   | --        | --      |
|            | Ca(ICC2/PI489777)SNP_00547 | 1369  | A | T | 10  | 3   | --        | --      |
|            | Ca(ICC2/PI489777)SNP_00548 | 1445  | G | T | 9   | 4   | --        | --      |
|            | Ca(ICC2/PI489777)SNP_00549 | 1628  | G | A | 7   | 3   | --        | --      |
|            | Ca(ICC2/PI489777)SNP_00550 | 1642  | G | T | 3   | 3   | --        | --      |
|            | Ca(ICC2/PI489777)SNP_00551 | 1643  | T | G | 3   | 3   | --        | --      |
| CakTC25577 | Ca(ICC2/PI489777)SNP_00552 | 956   | A | C | 25  | 26  | Young_pod | --      |
|            | Ca(ICC2/PI489777)SNP_00553 | 976   | G | T | 22  | 26  | Young_pod | --      |
|            | Ca(ICC2/PI489777)SNP_00554 | 1004  | T | C | 22  | 37  | Young_pod | --      |
| CakTC43302 | Ca(ICC2/PI489777)SNP_00555 | 1558  | T | A | 22  | 9   | --        | --      |
|            | Ca(ICC2/PI489777)SNP_00556 | 1600  | T | G | 24  | 15  | --        | --      |
|            | Ca(ICC2/PI489777)SNP_00557 | 1645  | A | G | 23  | 13  | --        | --      |
|            | Ca(ICC2/PI489777)SNP_00558 | 1720  | T | G | 23  | 10  | --        | --      |
|            | Ca(ICC2/PI489777)SNP_00559 | 1721  | T | G | 23  | 13  | --        | --      |
| CakTC23592 | Ca(ICC2/PI489777)SNP_00560 | 181   | T | A | 16  | 4   | Root      | --      |
|            | Ca(ICC2/PI489777)SNP_00561 | 259   | C | T | 16  | 6   | Root      | --      |
|            | Ca(ICC2/PI489777)SNP_00562 | 265   | C | T | 16  | 6   | Root      | --      |
|            | Ca(ICC2/PI489777)SNP_00563 | 294   | C | T | 17  | 7   | Root      | --      |
|            | Ca(ICC2/PI489777)SNP_00564 | 297   | G | A | 17  | 6   | Root      | --      |
|            | Ca(ICC2/PI489777)SNP_00565 | 328   | C | T | 13  | 4   | Root      | --      |
| CakTC28488 | Ca(ICC2/PI489777)SNP_00566 | 1164  | G | T | 7   | 3   | --        | --      |
|            | Ca(ICC2/PI489777)SNP_00567 | 1365  | T | A | 4   | 4   | --        | --      |
|            | Ca(ICC2/PI489777)SNP_00568 | 1416  | T | G | 7   | 4   | --        | --      |
| CakTC38934 | Ca(ICC2/PI489777)SNP_00569 | 730   | G | T | 21  | 9   | --        | G2-like |
| CakTC11093 | Ca(ICC2/PI489777)SNP_00570 | 1163  | G | A | 14  | 6   | --        | --      |
|            | Ca(ICC2/PI489777)SNP_00571 | 1322  | C | T | 9   | 7   | --        | --      |
|            | Ca(ICC2/PI489777)SNP_00572 | 1408  | C | G | 5   | 10  | --        | --      |
|            | Ca(ICC2/PI489777)SNP_00573 | 1682  | T | G | 8   | 11  | --        | --      |
|            | Ca(ICC2/PI489777)SNP_00574 | 1803  | G | T | 14  | 8   | --        | --      |
|            | Ca(ICC2/PI489777)SNP_00575 | 1806  | T | A | 15  | 8   | --        | --      |
|            | Ca(ICC2/PI489777)SNP_00576 | 1820  | G | T | 15  | 7   | --        | --      |
| CakTC42620 | Ca(ICC2/PI489777)SNP_00577 | 491   | T | C | 7   | 4   | --        | --      |
|            | Ca(ICC2/PI489777)SNP_00578 | 570   | T | C | 6   | 3   | --        | --      |
|            | Ca(ICC2/PI489777)SNP_00579 | 711   | C | G | 4   | 3   | --        | --      |
|            | Ca(ICC2/PI489777)SNP_00580 | 886   | A | G | 4   | 3   | --        | --      |
|            | Ca(ICC2/PI489777)SNP_00581 | 897   | C | A | 3   | 3   | --        | --      |
| CakTC38639 | Ca(ICC2/PI489777)SNP_00582 | 822   | T | G | 10  | 21  | --        | --      |
|            | Ca(ICC2/PI489777)SNP_00583 | 861   | A | T | 12  | 20  | --        | --      |
|            | Ca(ICC2/PI489777)SNP_00584 | 1308  | A | G | 14  | 14  | --        | --      |
| CakTC42966 | Ca(ICC2/PI489777)SNP_00585 | 167   | G | T | 14  | 5   | --        | --      |
|            | Ca(ICC2/PI489777)SNP_00586 | 176   | T | G | 14  | 8   | --        | --      |
|            | Ca(ICC2/PI489777)SNP_00587 | 437   | C | T | 13  | 4   | --        | --      |



|            |                            |      |   |   |    |    |           |                |
|------------|----------------------------|------|---|---|----|----|-----------|----------------|
|            | Ca(ICC2/P1489777)SNP_00588 | 585  | G | T | 6  | 5  | --        | --             |
|            | Ca(ICC2/P1489777)SNP_00589 | 599  | A | G | 5  | 6  | --        | --             |
| CakTC28021 | Ca(ICC2/P1489777)SNP_00590 | 625  | G | A | 11 | 7  | --        | --             |
|            | Ca(ICC2/P1489777)SNP_00591 | 799  | T | C | 15 | 6  | --        | --             |
|            | Ca(ICC2/P1489777)SNP_00592 | 817  | T | C | 15 | 6  | --        | --             |
|            | Ca(ICC2/P1489777)SNP_00593 | 907  | A | G | 13 | 5  | --        | --             |
|            | Ca(ICC2/P1489777)SNP_00594 | 970  | T | C | 10 | 5  | --        | --             |
|            | Ca(ICC2/P1489777)SNP_00595 | 976  | C | T | 11 | 5  | --        | --             |
|            | Ca(ICC2/P1489777)SNP_00596 | 1027 | C | T | 8  | 5  | --        | --             |
| CakTC10157 | Ca(ICC2/P1489777)SNP_00597 | 762  | T | C | 3  | 3  | --        | Coactivatorp15 |
| CakTC11773 | Ca(ICC2/P1489777)SNP_00598 | 1247 | C | G | 5  | 3  | --        | --             |
| CakTC40245 | Ca(ICC2/P1489777)SNP_00599 | 932  | T | G | 31 | 7  | --        | OFP            |
| CakTC37693 | Ca(ICC2/P1489777)SNP_00600 | 1050 | T | C | 5  | 6  | --        | --             |
| CakTC31819 | Ca(ICC2/P1489777)SNP_00601 | 645  | C | T | 3  | 8  | --        | --             |
| CakTC35751 | Ca(ICC2/P1489777)SNP_00602 | 408  | C | G | 7  | 5  | --        | --             |
|            | Ca(ICC2/P1489777)SNP_00603 | 465  | T | A | 7  | 8  | --        | --             |
|            | Ca(ICC2/P1489777)SNP_00604 | 917  | T | C | 4  | 13 | --        | --             |
|            | Ca(ICC2/P1489777)SNP_00605 | 1019 | A | G | 6  | 11 | --        | --             |
|            | Ca(ICC2/P1489777)SNP_00606 | 1255 | G | T | 9  | 13 | --        | --             |
|            | Ca(ICC2/P1489777)SNP_00607 | 2266 | T | C | 12 | 3  | --        | --             |
|            | Ca(ICC2/P1489777)SNP_00608 | 2566 | G | A | 5  | 3  | --        | --             |
|            | Ca(ICC2/P1489777)SNP_00609 | 2622 | C | T | 6  | 3  | --        | --             |
| CakTC39395 | Ca(ICC2/P1489777)SNP_00610 | 49   | A | C | 8  | 5  | --        | --             |
|            | Ca(ICC2/P1489777)SNP_00611 | 595  | A | T | 18 | 9  | --        | --             |
|            | Ca(ICC2/P1489777)SNP_00612 | 742  | T | C | 9  | 13 | --        | --             |
|            | Ca(ICC2/P1489777)SNP_00613 | 985  | C | T | 8  | 12 | --        | --             |
|            | Ca(ICC2/P1489777)SNP_00614 | 989  | T | C | 7  | 13 | --        | --             |
| CakTC22745 | Ca(ICC2/P1489777)SNP_00615 | 540  | T | C | 27 | 39 | --        | --             |
| CakTC39188 | Ca(ICC2/P1489777)SNP_00616 | 285  | C | T | 4  | 6  | --        | NAC            |
| CakTC35920 | Ca(ICC2/P1489777)SNP_00617 | 775  | A | G | 26 | 15 | --        | --             |
|            | Ca(ICC2/P1489777)SNP_00618 | 778  | T | G | 25 | 15 | --        | --             |
|            | Ca(ICC2/P1489777)SNP_00619 | 1836 | A | G | 24 | 15 | --        | --             |
|            | Ca(ICC2/P1489777)SNP_00620 | 2355 | A | T | 52 | 23 | --        | --             |
|            | Ca(ICC2/P1489777)SNP_00621 | 2571 | C | T | 54 | 16 | --        | --             |
| CakTC28036 | Ca(ICC2/P1489777)SNP_00622 | 13   | A | C | 3  | 3  | --        | --             |
|            | Ca(ICC2/P1489777)SNP_00623 | 717  | A | G | 28 | 14 | --        | --             |
| CakTC26089 | Ca(ICC2/P1489777)SNP_00624 | 525  | T | G | 12 | 5  | --        | --             |
|            | Ca(ICC2/P1489777)SNP_00625 | 685  | G | A | 14 | 12 | --        | --             |
| CakTC37770 | Ca(ICC2/P1489777)SNP_00626 | 1642 | T | G | 3  | 4  | Young_pod | --             |
|            | Ca(ICC2/P1489777)SNP_00627 | 1971 | T | C | 4  | 4  | Young_pod | --             |
| CakTC26527 | Ca(ICC2/P1489777)SNP_00628 | 1643 | T | C | 5  | 4  | --        | SAP            |
| CakTC38653 | Ca(ICC2/P1489777)SNP_00629 | 820  | T | G | 9  | 3  | --        | GNAT           |
|            | Ca(ICC2/P1489777)SNP_00630 | 942  | A | T | 6  | 4  | --        | GNAT           |
|            | Ca(ICC2/P1489777)SNP_00631 | 977  | A | C | 8  | 5  | --        | GNAT           |
|            | Ca(ICC2/P1489777)SNP_00632 | 987  | T | C | 7  | 5  | --        | GNAT           |
| CakTC24676 | Ca(ICC2/P1489777)SNP_00633 | 616  | A | G | 20 | 10 | --        | Bromodomain    |
|            | Ca(ICC2/P1489777)SNP_00634 | 652  | A | G | 22 | 9  | --        | Bromodomain    |
|            | Ca(ICC2/P1489777)SNP_00635 | 724  | T | A | 25 | 6  | --        | Bromodomain    |
|            | Ca(ICC2/P1489777)SNP_00636 | 1880 | G | T | 66 | 38 | --        | Bromodomain    |
|            | Ca(ICC2/P1489777)SNP_00637 | 2000 | A | T | 71 | 54 | --        | Bromodomain    |
|            | Ca(ICC2/P1489777)SNP_00638 | 2060 | G | A | 79 | 53 | --        | Bromodomain    |
|            | Ca(ICC2/P1489777)SNP_00639 | 2678 | G | A | 51 | 32 | --        | Bromodomain    |
| CakTC43042 | Ca(ICC2/P1489777)SNP_00640 | 2019 | A | G | 6  | 7  | Young_pod | --             |
|            | Ca(ICC2/P1489777)SNP_00641 | 2115 | T | C | 7  | 7  | Young_pod | --             |
|            | Ca(ICC2/P1489777)SNP_00642 | 2309 | A | G | 4  | 8  | Young_pod | --             |
|            | Ca(ICC2/P1489777)SNP_00643 | 2475 | G | A | 6  | 4  | Young_pod | --             |
| CakTC38543 | Ca(ICC2/P1489777)SNP_00644 | 107  | C | G | 9  | 5  | --        | --             |
|            | Ca(ICC2/P1489777)SNP_00645 | 143  | A | C | 9  | 5  | --        | --             |
|            | Ca(ICC2/P1489777)SNP_00646 | 153  | G | C | 9  | 5  | --        | --             |
|            | Ca(ICC2/P1489777)SNP_00647 | 887  | G | C | 7  | 3  | --        | --             |
|            | Ca(ICC2/P1489777)SNP_00648 | 888  | G | A | 7  | 3  | --        | --             |
| CakTC39535 | Ca(ICC2/P1489777)SNP_00649 | 166  | T | C | 8  | 10 | --        | --             |
|            | Ca(ICC2/P1489777)SNP_00650 | 1299 | T | C | 13 | 7  | --        | --             |
| CakTC40092 | Ca(ICC2/P1489777)SNP_00651 | 567  | A | G | 46 | 36 | --        | --             |
|            | Ca(ICC2/P1489777)SNP_00652 | 964  | T | G | 34 | 23 | --        | --             |
| CakTC09845 | Ca(ICC2/P1489777)SNP_00653 | 261  | A | T | 7  | 3  | --        | --             |
| CakTC37452 | Ca(ICC2/P1489777)SNP_00654 | 113  | C | T | 28 | 5  | --        | --             |
|            | Ca(ICC2/P1489777)SNP_00655 | 279  | G | C | 33 | 10 | --        | --             |
|            | Ca(ICC2/P1489777)SNP_00656 | 317  | A | T | 29 | 10 | --        | --             |
|            | Ca(ICC2/P1489777)SNP_00657 | 351  | A | T | 34 | 11 | --        | --             |
|            | Ca(ICC2/P1489777)SNP_00658 | 671  | T | C | 18 | 6  | --        | --             |
|            | Ca(ICC2/P1489777)SNP_00659 | 760  | G | A | 20 | 3  | --        | --             |
| CakTC28309 | Ca(ICC2/P1489777)SNP_00660 | 1310 | T | A | 4  | 3  | Shoot     | --             |
|            | Ca(ICC2/P1489777)SNP_00661 | 1481 | C | T | 4  | 3  | Shoot     | --             |

|            |                            |      |   |   |    |    |           |      |
|------------|----------------------------|------|---|---|----|----|-----------|------|
|            | Ca(ICC2/PI489777)SNP_00662 | 1547 | A | T | 4  | 3  | Shoot     | --   |
| CakTC41784 | Ca(ICC2/PI489777)SNP_00663 | 1437 | G | A | 3  | 3  | --        | --   |
|            | Ca(ICC2/PI489777)SNP_00664 | 2271 | T | C | 4  | 5  | --        | --   |
| CakTC40437 | Ca(ICC2/PI489777)SNP_00665 | 486  | T | C | 16 | 8  | --        | --   |
|            | Ca(ICC2/PI489777)SNP_00666 | 1051 | A | G | 25 | 7  | --        | --   |
|            | Ca(ICC2/PI489777)SNP_00667 | 1794 | G | A | 9  | 4  | --        | --   |
|            | Ca(ICC2/PI489777)SNP_00668 | 1806 | A | G | 10 | 4  | --        | --   |
| CakTC37980 | Ca(ICC2/PI489777)SNP_00669 | 377  | T | C | 22 | 21 | --        | --   |
|            | Ca(ICC2/PI489777)SNP_00670 | 660  | A | T | 5  | 9  | --        | --   |
|            | Ca(ICC2/PI489777)SNP_00671 | 930  | T | C | 3  | 5  | --        | --   |
| CakTC32872 | Ca(ICC2/PI489777)SNP_00672 | 683  | A | G | 10 | 3  | --        | --   |
|            | Ca(ICC2/PI489777)SNP_00673 | 2759 | G | A | 5  | 3  | --        | --   |
|            | Ca(ICC2/PI489777)SNP_00674 | 2906 | C | G | 6  | 3  | --        | --   |
| CakTC43219 | Ca(ICC2/PI489777)SNP_00675 | 538  | A | G | 8  | 8  | --        | --   |
|            | Ca(ICC2/PI489777)SNP_00676 | 811  | T | C | 13 | 7  | --        | --   |
|            | Ca(ICC2/PI489777)SNP_00677 | 859  | T | G | 11 | 8  | --        | --   |
| CakTC27429 | Ca(ICC2/PI489777)SNP_00678 | 217  | A | C | 4  | 6  | --        | --   |
|            | Ca(ICC2/PI489777)SNP_00679 | 281  | A | G | 4  | 6  | --        | --   |
|            | Ca(ICC2/PI489777)SNP_00680 | 442  | A | C | 5  | 5  | --        | --   |
| CakTC10809 | Ca(ICC2/PI489777)SNP_00681 | 547  | G | T | 30 | 10 | --        | --   |
|            | Ca(ICC2/PI489777)SNP_00682 | 574  | T | C | 24 | 7  | --        | --   |
|            | Ca(ICC2/PI489777)SNP_00683 | 678  | A | T | 15 | 5  | --        | --   |
| CakTC40787 | Ca(ICC2/PI489777)SNP_00684 | 701  | C | T | 4  | 6  | --        | --   |
| CakTC32689 | Ca(ICC2/PI489777)SNP_00685 | 1805 | C | T | 6  | 6  | --        | --   |
|            | Ca(ICC2/PI489777)SNP_00686 | 1973 | G | A | 4  | 5  | --        | --   |
| CakTC37743 | Ca(ICC2/PI489777)SNP_00687 | 71   | T | A | 5  | 3  | --        | Tify |
|            | Ca(ICC2/PI489777)SNP_00688 | 95   | C | G | 9  | 3  | --        | Tify |
|            | Ca(ICC2/PI489777)SNP_00689 | 620  | A | G | 27 | 26 | --        | Tify |
|            | Ca(ICC2/PI489777)SNP_00690 | 632  | C | T | 27 | 25 | --        | Tify |
| CakTC30803 | Ca(ICC2/PI489777)SNP_00691 | 827  | C | G | 7  | 3  | Root      | --   |
| CakTC39110 | Ca(ICC2/PI489777)SNP_00692 | 324  | G | A | 48 | 45 | --        | TPR  |
|            | Ca(ICC2/PI489777)SNP_00693 | 623  | A | T | 46 | 18 | --        | TPR  |
|            | Ca(ICC2/PI489777)SNP_00694 | 944  | A | G | 54 | 21 | --        | TPR  |
|            | Ca(ICC2/PI489777)SNP_00695 | 1199 | A | C | 39 | 37 | --        | TPR  |
| CakTC38307 | Ca(ICC2/PI489777)SNP_00696 | 658  | T | C | 4  | 4  | --        | --   |
|            | Ca(ICC2/PI489777)SNP_00697 | 1000 | T | A | 4  | 4  | --        | --   |
| CakTC38093 | Ca(ICC2/PI489777)SNP_00698 | 365  | G | T | 7  | 9  | --        | --   |
|            | Ca(ICC2/PI489777)SNP_00699 | 471  | C | G | 4  | 6  | --        | --   |
| CakTC13170 | Ca(ICC2/PI489777)SNP_00700 | 500  | T | C | 8  | 3  | --        | --   |
|            | Ca(ICC2/PI489777)SNP_00701 | 727  | A | T | 20 | 5  | --        | --   |
|            | Ca(ICC2/PI489777)SNP_00702 | 795  | C | T | 22 | 5  | --        | --   |
|            | Ca(ICC2/PI489777)SNP_00703 | 811  | G | C | 19 | 5  | --        | --   |
|            | Ca(ICC2/PI489777)SNP_00704 | 824  | G | T | 22 | 5  | --        | --   |
|            | Ca(ICC2/PI489777)SNP_00705 | 865  | T | A | 21 | 5  | --        | --   |
|            | Ca(ICC2/PI489777)SNP_00706 | 972  | C | T | 19 | 3  | --        | --   |
| CakTC39209 | Ca(ICC2/PI489777)SNP_00707 | 762  | T | C | 9  | 4  | --        | --   |
| CakTC26568 | Ca(ICC2/PI489777)SNP_00708 | 239  | G | A | 65 | 68 | --        | --   |
| CakTC40632 | Ca(ICC2/PI489777)SNP_00709 | 343  | C | T | 5  | 11 | --        | --   |
|            | Ca(ICC2/PI489777)SNP_00710 | 1945 | G | A | 5  | 3  | --        | --   |
| CakTC29562 | Ca(ICC2/PI489777)SNP_00711 | 842  | T | C | 3  | 4  | --        | --   |
| CakTC24061 | Ca(ICC2/PI489777)SNP_00712 | 3204 | G | T | 4  | 3  | --        | --   |
| CakTC30522 | Ca(ICC2/PI489777)SNP_00713 | 1474 | C | T | 5  | 3  | --        | --   |
| CakTC23769 | Ca(ICC2/PI489777)SNP_00714 | 2039 | G | A | 8  | 7  | --        | --   |
|            | Ca(ICC2/PI489777)SNP_00715 | 2907 | G | A | 3  | 4  | --        | --   |
|            | Ca(ICC2/PI489777)SNP_00716 | 2937 | G | A | 4  | 4  | --        | --   |
|            | Ca(ICC2/PI489777)SNP_00717 | 2952 | G | A | 4  | 4  | --        | --   |
|            | Ca(ICC2/PI489777)SNP_00718 | 2956 | G | A | 4  | 4  | --        | --   |
|            | Ca(ICC2/PI489777)SNP_00719 | 2962 | G | C | 4  | 4  | --        | --   |
|            | Ca(ICC2/PI489777)SNP_00720 | 2996 | C | T | 4  | 4  | --        | --   |
|            | Ca(ICC2/PI489777)SNP_00721 | 3013 | A | G | 5  | 4  | --        | --   |
| CakTC29152 | Ca(ICC2/PI489777)SNP_00722 | 339  | G | A | 4  | 5  | Young_pod | --   |
|            | Ca(ICC2/PI489777)SNP_00723 | 478  | T | C | 6  | 4  | Young_pod | --   |
| CakTC31419 | Ca(ICC2/PI489777)SNP_00724 | 979  | T | C | 6  | 3  | --        | --   |
|            | Ca(ICC2/PI489777)SNP_00725 | 2543 | A | G | 6  | 6  | --        | --   |
|            | Ca(ICC2/PI489777)SNP_00726 | 2576 | C | T | 6  | 8  | --        | --   |
|            | Ca(ICC2/PI489777)SNP_00727 | 2789 | T | A | 5  | 9  | --        | --   |
| CakTC11605 | Ca(ICC2/PI489777)SNP_00728 | 32   | G | T | 23 | 12 | --        | --   |
|            | Ca(ICC2/PI489777)SNP_00729 | 51   | T | G | 28 | 21 | --        | --   |
|            | Ca(ICC2/PI489777)SNP_00730 | 223  | T | A | 48 | 30 | --        | --   |
|            | Ca(ICC2/PI489777)SNP_00731 | 244  | A | G | 50 | 31 | --        | --   |
|            | Ca(ICC2/PI489777)SNP_00732 | 394  | G | C | 48 | 26 | --        | --   |
|            | Ca(ICC2/PI489777)SNP_00733 | 433  | A | T | 46 | 36 | --        | --   |
| CakTC09596 | Ca(ICC2/PI489777)SNP_00734 | 50   | C | T | 61 | 42 | --        | --   |
|            | Ca(ICC2/PI489777)SNP_00735 | 59   | C | T | 61 | 44 | --        | --   |

|            |                            |      |   |   |    |    |        |           |
|------------|----------------------------|------|---|---|----|----|--------|-----------|
| CakTC40651 | Ca(ICC2/P1489777)SNP_00736 | 175  | T | C | 22 | 27 | --     | --        |
|            | Ca(ICC2/P1489777)SNP_00737 | 627  | T | C | 96 | 84 | --     | --        |
|            | Ca(ICC2/P1489777)SNP_00738 | 1089 | A | C | 50 | 30 | --     | --        |
|            | Ca(ICC2/P1489777)SNP_00739 | 1458 | A | G | 35 | 26 | --     | --        |
| CakTC39319 | Ca(ICC2/P1489777)SNP_00740 | 335  | C | G | 6  | 4  | --     | --        |
|            | Ca(ICC2/P1489777)SNP_00741 | 357  | G | T | 7  | 4  | --     | --        |
|            | Ca(ICC2/P1489777)SNP_00742 | 501  | G | A | 5  | 3  | --     | --        |
|            | Ca(ICC2/P1489777)SNP_00743 | 1136 | G | T | 5  | 9  | --     | --        |
|            | Ca(ICC2/P1489777)SNP_00744 | 1227 | C | T | 4  | 9  | --     | --        |
|            | Ca(ICC2/P1489777)SNP_00745 | 1395 | C | T | 3  | 5  | --     | --        |
| CakTC30002 | Ca(ICC2/P1489777)SNP_00746 | 2218 | G | C | 5  | 5  | --     | --        |
|            | Ca(ICC2/P1489777)SNP_00747 | 2338 | C | A | 4  | 4  | --     | --        |
|            | Ca(ICC2/P1489777)SNP_00748 | 2560 | T | C | 4  | 20 | --     | --        |
|            | Ca(ICC2/P1489777)SNP_00749 | 2722 | T | C | 4  | 22 | --     | --        |
| CakTC18097 | Ca(ICC2/P1489777)SNP_00750 | 2306 | G | T | 12 | 16 | --     | --        |
|            | Ca(ICC2/P1489777)SNP_00751 | 2349 | G | A | 10 | 15 | --     | --        |
| CakTC01693 | Ca(ICC2/P1489777)SNP_00752 | 296  | A | G | 7  | 4  | --     | AP2-EREBP |
|            | Ca(ICC2/P1489777)SNP_00753 | 603  | C | A | 8  | 6  | --     | AP2-EREBP |
|            | Ca(ICC2/P1489777)SNP_00754 | 636  | A | C | 9  | 7  | --     | AP2-EREBP |
|            | Ca(ICC2/P1489777)SNP_00755 | 737  | G | C | 8  | 4  | --     | AP2-EREBP |
| CakTC29180 | Ca(ICC2/P1489777)SNP_00756 | 664  | G | A | 7  | 3  | --     | --        |
| CakTC41487 | Ca(ICC2/P1489777)SNP_00757 | 1046 | T | A | 7  | 4  | --     | --        |
|            | Ca(ICC2/P1489777)SNP_00758 | 2338 | G | A | 4  | 5  | --     | --        |
| CakTC39684 | Ca(ICC2/P1489777)SNP_00759 | 39   | A | T | 5  | 3  | --     | --        |
|            | Ca(ICC2/P1489777)SNP_00760 | 42   | T | C | 5  | 3  | --     | --        |
|            | Ca(ICC2/P1489777)SNP_00761 | 58   | G | A | 9  | 6  | --     | --        |
|            | Ca(ICC2/P1489777)SNP_00762 | 1048 | G | A | 8  | 3  | --     | --        |
| CakTC27977 | Ca(ICC2/P1489777)SNP_00763 | 2625 | A | G | 6  | 4  | --     | --        |
|            | Ca(ICC2/P1489777)SNP_00764 | 2799 | T | C | 8  | 4  | --     | --        |
|            | Ca(ICC2/P1489777)SNP_00765 | 2886 | T | G | 9  | 3  | --     | --        |
| CakTC34401 | Ca(ICC2/P1489777)SNP_00766 | 346  | T | A | 9  | 6  | --     | --        |
|            | Ca(ICC2/P1489777)SNP_00767 | 404  | C | T | 10 | 6  | --     | --        |
|            | Ca(ICC2/P1489777)SNP_00768 | 493  | A | G | 10 | 8  | --     | --        |
|            | Ca(ICC2/P1489777)SNP_00769 | 707  | G | T | 7  | 7  | --     | --        |
|            | Ca(ICC2/P1489777)SNP_00770 | 2053 | G | A | 5  | 10 | --     | --        |
| CakTC34664 | Ca(ICC2/P1489777)SNP_00771 | 738  | C | A | 4  | 4  | --     | --        |
|            | Ca(ICC2/P1489777)SNP_00772 | 748  | A | G | 4  | 4  | --     | --        |
| CakTC39433 | Ca(ICC2/P1489777)SNP_00773 | 927  | T | C | 12 | 14 | --     | --        |
| CakTC31316 | Ca(ICC2/P1489777)SNP_00774 | 917  | G | A | 17 | 3  | --     | --        |
|            | Ca(ICC2/P1489777)SNP_00775 | 1036 | A | G | 14 | 6  | --     | --        |
|            | Ca(ICC2/P1489777)SNP_00776 | 1278 | T | C | 14 | 7  | --     | --        |
|            | Ca(ICC2/P1489777)SNP_00777 | 1454 | G | A | 30 | 7  | --     | --        |
|            | Ca(ICC2/P1489777)SNP_00778 | 1628 | T | C | 12 | 7  | --     | --        |
|            | Ca(ICC2/P1489777)SNP_00779 | 1709 | A | T | 11 | 5  | --     | --        |
|            | Ca(ICC2/P1489777)SNP_00780 | 1992 | G | A | 9  | 8  | --     | --        |
|            | Ca(ICC2/P1489777)SNP_00781 | 2006 | A | C | 7  | 9  | --     | --        |
| CakTC25406 | Ca(ICC2/P1489777)SNP_00782 | 3816 | C | T | 5  | 3  | --     | --        |
|            | Ca(ICC2/P1489777)SNP_00783 | 3817 | A | G | 5  | 3  | --     | --        |
| CakTC42686 | Ca(ICC2/P1489777)SNP_00784 | 33   | C | T | 36 | 4  | --     | --        |
|            | Ca(ICC2/P1489777)SNP_00785 | 529  | T | C | 13 | 7  | --     | --        |
|            | Ca(ICC2/P1489777)SNP_00786 | 556  | C | T | 13 | 6  | --     | --        |
|            | Ca(ICC2/P1489777)SNP_00787 | 627  | A | G | 7  | 3  | --     | --        |
|            | Ca(ICC2/P1489777)SNP_00788 | 637  | G | A | 7  | 3  | --     | --        |
|            | Ca(ICC2/P1489777)SNP_00789 | 639  | C | T | 7  | 3  | --     | --        |
| CakTC39192 | Ca(ICC2/P1489777)SNP_00790 | 807  | C | T | 11 | 6  | --     | --        |
|            | Ca(ICC2/P1489777)SNP_00791 | 942  | G | C | 18 | 8  | --     | --        |
|            | Ca(ICC2/P1489777)SNP_00792 | 954  | C | T | 16 | 9  | --     | --        |
|            | Ca(ICC2/P1489777)SNP_00793 | 1128 | C | T | 17 | 12 | --     | --        |
|            | Ca(ICC2/P1489777)SNP_00794 | 1391 | T | C | 7  | 8  | --     | --        |
| CakTC30913 | Ca(ICC2/P1489777)SNP_00795 | 503  | T | G | 7  | 7  | --     | --        |
|            | Ca(ICC2/P1489777)SNP_00796 | 1531 | C | G | 3  | 3  | --     | --        |
| CakTC12693 | Ca(ICC2/P1489777)SNP_00797 | 228  | C | A | 59 | 18 | --     | --        |
|            | Ca(ICC2/P1489777)SNP_00798 | 361  | G | T | 68 | 17 | --     | --        |
|            | Ca(ICC2/P1489777)SNP_00799 | 436  | G | A | 59 | 16 | --     | --        |
| CakTC07705 | Ca(ICC2/P1489777)SNP_00800 | 92   | C | T | 17 | 6  | Flower | bud       |
|            | Ca(ICC2/P1489777)SNP_00801 | 110  | A | G | 17 | 4  | Flower | bud       |
|            | Ca(ICC2/P1489777)SNP_00802 | 278  | C | A | 25 | 6  | Flower | bud       |
| CakTC33946 | Ca(ICC2/P1489777)SNP_00803 | 301  | G | A | 53 | 33 | --     | --        |
|            | Ca(ICC2/P1489777)SNP_00804 | 750  | G | C | 58 | 54 | --     | --        |
|            | Ca(ICC2/P1489777)SNP_00805 | 1664 | A | G | 32 | 28 | --     | --        |
| CakTC26974 | Ca(ICC2/P1489777)SNP_00806 | 1836 | C | G | 14 | 6  | --     | --        |
|            | Ca(ICC2/P1489777)SNP_00807 | 2384 | G | A | 8  | 7  | --     | --        |
| CakTC36339 | Ca(ICC2/P1489777)SNP_00808 | 45   | C | G | 34 | 3  | --     | --        |
|            | Ca(ICC2/P1489777)SNP_00809 | 82   | A | T | 49 | 4  | --     | --        |

|            |                            |      |   |   |     |    |        |             |
|------------|----------------------------|------|---|---|-----|----|--------|-------------|
|            | Ca(ICC2/PI489777)SNP_00810 | 94   | C | T | 54  | 7  | --     | --          |
|            | Ca(ICC2/PI489777)SNP_00811 | 193  | G | A | 129 | 9  | --     | --          |
|            | Ca(ICC2/PI489777)SNP_00812 | 436  | T | G | 80  | 14 | --     | --          |
|            | Ca(ICC2/PI489777)SNP_00813 | 444  | A | G | 108 | 15 | --     | --          |
| CakTC34634 | Ca(ICC2/PI489777)SNP_00814 | 225  | G | A | 4   | 4  | --     | --          |
|            | Ca(ICC2/PI489777)SNP_00815 | 419  | C | T | 5   | 4  | --     | --          |
|            | Ca(ICC2/PI489777)SNP_00816 | 496  | C | T | 5   | 4  | --     | --          |
| CakTC39258 | Ca(ICC2/PI489777)SNP_00817 | 517  | A | G | 4   | 3  | --     | --          |
|            | Ca(ICC2/PI489777)SNP_00818 | 1506 | T | G | 4   | 7  | --     | --          |
| CakTC33896 | Ca(ICC2/PI489777)SNP_00819 | 372  | A | G | 17  | 4  | --     | --          |
| CakTC36599 | Ca(ICC2/PI489777)SNP_00820 | 680  | T | C | 15  | 9  | --     | --          |
|            | Ca(ICC2/PI489777)SNP_00821 | 707  | G | A | 17  | 9  | --     | --          |
|            | Ca(ICC2/PI489777)SNP_00822 | 890  | T | C | 13  | 8  | --     | --          |
|            | Ca(ICC2/PI489777)SNP_00823 | 1073 | A | T | 8   | 10 | --     | --          |
|            | Ca(ICC2/PI489777)SNP_00824 | 1259 | C | G | 13  | 7  | --     | --          |
|            | Ca(ICC2/PI489777)SNP_00825 | 1340 | A | G | 13  | 4  | --     | --          |
|            | Ca(ICC2/PI489777)SNP_00826 | 1526 | C | T | 13  | 4  | --     | --          |
|            | Ca(ICC2/PI489777)SNP_00827 | 1574 | A | G | 10  | 4  | --     | --          |
|            | Ca(ICC2/PI489777)SNP_00828 | 1694 | C | T | 9   | 5  | --     | --          |
|            | Ca(ICC2/PI489777)SNP_00829 | 1718 | A | G | 10  | 4  | --     | --          |
|            | Ca(ICC2/PI489777)SNP_00830 | 1829 | G | A | 14  | 7  | --     | --          |
|            | Ca(ICC2/PI489777)SNP_00831 | 2651 | G | A | 8   | 3  | --     | --          |
| CakTC35749 | Ca(ICC2/PI489777)SNP_00832 | 316  | A | G | 8   | 20 | --     | --          |
|            | Ca(ICC2/PI489777)SNP_00833 | 1044 | C | T | 15  | 14 | --     | --          |
|            | Ca(ICC2/PI489777)SNP_00834 | 1144 | C | T | 12  | 15 | --     | --          |
|            | Ca(ICC2/PI489777)SNP_00835 | 2626 | A | G | 11  | 4  | --     | --          |
|            | Ca(ICC2/PI489777)SNP_00836 | 3271 | A | G | 3   | 6  | --     | --          |
| CakTC35309 | Ca(ICC2/PI489777)SNP_00837 | 231  | T | G | 7   | 5  | --     | Bromodomain |
|            | Ca(ICC2/PI489777)SNP_00838 | 427  | G | A | 17  | 6  | --     | Bromodomain |
|            | Ca(ICC2/PI489777)SNP_00839 | 610  | T | C | 23  | 9  | --     | Bromodomain |
|            | Ca(ICC2/PI489777)SNP_00840 | 1030 | T | G | 14  | 8  | --     | Bromodomain |
|            | Ca(ICC2/PI489777)SNP_00841 | 1197 | C | T | 11  | 7  | --     | Bromodomain |
|            | Ca(ICC2/PI489777)SNP_00842 | 1198 | G | A | 11  | 7  | --     | Bromodomain |
|            | Ca(ICC2/PI489777)SNP_00843 | 1706 | C | A | 11  | 8  | --     | Bromodomain |
|            | Ca(ICC2/PI489777)SNP_00844 | 2098 | T | C | 10  | 9  | --     | Bromodomain |
|            | Ca(ICC2/PI489777)SNP_00845 | 2110 | G | A | 10  | 9  | --     | Bromodomain |
|            | Ca(ICC2/PI489777)SNP_00846 | 2284 | T | A | 17  | 10 | --     | Bromodomain |
|            | Ca(ICC2/PI489777)SNP_00847 | 2345 | C | T | 21  | 9  | --     | Bromodomain |
|            | Ca(ICC2/PI489777)SNP_00848 | 3058 | A | G | 6   | 9  | --     | Bromodomain |
|            | Ca(ICC2/PI489777)SNP_00849 | 3296 | G | A | 3   | 3  | --     | Bromodomain |
| CakTC26388 | Ca(ICC2/PI489777)SNP_00850 | 192  | A | T | 11  | 6  | --     | LIM         |
|            | Ca(ICC2/PI489777)SNP_00851 | 858  | T | C | 17  | 12 | --     | LIM         |
| CakTC09265 | Ca(ICC2/PI489777)SNP_00852 | 1299 | G | A | 9   | 4  | Flower | bud         |
| CakTC29525 | Ca(ICC2/PI489777)SNP_00853 | 1514 | C | T | 3   | 3  | Flower | bud         |
|            | Ca(ICC2/PI489777)SNP_00854 | 1701 | A | G | 5   | 3  | Flower | bud         |
|            | Ca(ICC2/PI489777)SNP_00855 | 1948 | T | C | 4   | 5  | Flower | bud         |
|            | Ca(ICC2/PI489777)SNP_00856 | 1959 | G | T | 7   | 3  | Flower | bud         |
|            | Ca(ICC2/PI489777)SNP_00857 | 1984 | C | G | 6   | 5  | Flower | bud         |
|            | Ca(ICC2/PI489777)SNP_00858 | 2555 | T | C | 3   | 8  | Flower | bud         |
| CakTC01807 | Ca(ICC2/PI489777)SNP_00859 | 163  | T | C | 4   | 4  | --     | --          |
| CakTC43335 | Ca(ICC2/PI489777)SNP_00860 | 441  | A | G | 9   | 3  | --     | HSF         |
|            | Ca(ICC2/PI489777)SNP_00861 | 1213 | A | G | 5   | 3  | --     | HSF         |
|            | Ca(ICC2/PI489777)SNP_00862 | 1244 | T | C | 5   | 4  | --     | HSF         |
|            | Ca(ICC2/PI489777)SNP_00863 | 1257 | C | T | 4   | 4  | --     | HSF         |
|            | Ca(ICC2/PI489777)SNP_00864 | 1259 | A | G | 4   | 4  | --     | HSF         |
|            | Ca(ICC2/PI489777)SNP_00865 | 1467 | C | G | 3   | 3  | --     | HSF         |
|            | Ca(ICC2/PI489777)SNP_00866 | 1530 | T | C | 5   | 3  | --     | HSF         |
| CakTC11120 | Ca(ICC2/PI489777)SNP_00867 | 204  | G | A | 8   | 4  | --     | --          |
|            | Ca(ICC2/PI489777)SNP_00868 | 209  | T | C | 9   | 4  | --     | --          |
|            | Ca(ICC2/PI489777)SNP_00869 | 345  | G | A | 9   | 6  | --     | --          |
|            | Ca(ICC2/PI489777)SNP_00870 | 802  | T | G | 11  | 9  | --     | --          |
|            | Ca(ICC2/PI489777)SNP_00871 | 803  | T | A | 11  | 9  | --     | --          |
|            | Ca(ICC2/PI489777)SNP_00872 | 813  | A | G | 13  | 7  | --     | --          |
| CakTC32929 | Ca(ICC2/PI489777)SNP_00873 | 384  | G | A | 6   | 3  | --     | --          |
|            | Ca(ICC2/PI489777)SNP_00874 | 639  | G | A | 6   | 4  | --     | --          |
| CakTC37747 | Ca(ICC2/PI489777)SNP_00875 | 591  | A | G | 3   | 4  | --     | --          |
|            | Ca(ICC2/PI489777)SNP_00876 | 894  | G | A | 4   | 3  | --     | --          |
|            | Ca(ICC2/PI489777)SNP_00877 | 915  | T | A | 3   | 3  | --     | --          |
| CakTC37525 | Ca(ICC2/PI489777)SNP_00878 | 47   | A | G | 16  | 8  | --     | --          |
|            | Ca(ICC2/PI489777)SNP_00879 | 53   | C | G | 16  | 10 | --     | --          |
|            | Ca(ICC2/PI489777)SNP_00880 | 770  | A | G | 6   | 3  | --     | --          |
|            | Ca(ICC2/PI489777)SNP_00881 | 878  | C | T | 9   | 7  | --     | --          |
|            | Ca(ICC2/PI489777)SNP_00882 | 912  | G | A | 10  | 7  | --     | --          |
|            | Ca(ICC2/PI489777)SNP_00883 | 1052 | C | A | 12  | 7  | --     | --          |

|            |                            |      |   |   |    |    |    |    |
|------------|----------------------------|------|---|---|----|----|----|----|
|            | Ca(ICC2/PI489777)SNP_00884 | 1172 | G | A | 12 | 8  | -- | -- |
|            | Ca(ICC2/PI489777)SNP_00885 | 1184 | G | A | 12 | 9  | -- | -- |
|            | Ca(ICC2/PI489777)SNP_00886 | 1295 | A | G | 4  | 7  | -- | -- |
| CakTC24423 | Ca(ICC2/PI489777)SNP_00887 | 342  | A | G | 7  | 3  | -- | -- |
|            | Ca(ICC2/PI489777)SNP_00888 | 795  | A | G | 4  | 14 | -- | -- |
|            | Ca(ICC2/PI489777)SNP_00889 | 864  | G | A | 10 | 12 | -- | -- |
|            | Ca(ICC2/PI489777)SNP_00890 | 1178 | T | A | 15 | 6  | -- | -- |
|            | Ca(ICC2/PI489777)SNP_00891 | 1397 | C | T | 16 | 6  | -- | -- |
| CakTC40428 | Ca(ICC2/PI489777)SNP_00892 | 158  | C | T | 8  | 11 | -- | -- |
|            | Ca(ICC2/PI489777)SNP_00893 | 161  | A | T | 8  | 12 | -- | -- |
|            | Ca(ICC2/PI489777)SNP_00894 | 191  | G | C | 10 | 12 | -- | -- |
|            | Ca(ICC2/PI489777)SNP_00895 | 458  | A | G | 14 | 7  | -- | -- |
|            | Ca(ICC2/PI489777)SNP_00896 | 482  | G | A | 13 | 4  | -- | -- |
|            | Ca(ICC2/PI489777)SNP_00897 | 1430 | G | C | 9  | 5  | -- | -- |
| CakTC38557 | Ca(ICC2/PI489777)SNP_00898 | 353  | T | C | 15 | 24 | -- | -- |
|            | Ca(ICC2/PI489777)SNP_00899 | 419  | A | C | 15 | 25 | -- | -- |
|            | Ca(ICC2/PI489777)SNP_00900 | 481  | T | C | 19 | 35 | -- | -- |
|            | Ca(ICC2/PI489777)SNP_00901 | 590  | A | G | 26 | 43 | -- | -- |
|            | Ca(ICC2/PI489777)SNP_00902 | 614  | C | T | 26 | 48 | -- | -- |
|            | Ca(ICC2/PI489777)SNP_00903 | 671  | T | C | 22 | 47 | -- | -- |
|            | Ca(ICC2/PI489777)SNP_00904 | 683  | G | A | 22 | 41 | -- | -- |
|            | Ca(ICC2/PI489777)SNP_00905 | 714  | G | T | 19 | 49 | -- | -- |
|            | Ca(ICC2/PI489777)SNP_00906 | 727  | C | G | 21 | 46 | -- | -- |
|            | Ca(ICC2/PI489777)SNP_00907 | 803  | A | G | 15 | 41 | -- | -- |
|            | Ca(ICC2/PI489777)SNP_00908 | 852  | G | A | 19 | 39 | -- | -- |
|            | Ca(ICC2/PI489777)SNP_00909 | 948  | G | A | 3  | 18 | -- | -- |
| CakTC37200 | Ca(ICC2/PI489777)SNP_00910 | 86   | T | C | 6  | 3  | -- | -- |
|            | Ca(ICC2/PI489777)SNP_00911 | 109  | C | G | 9  | 4  | -- | -- |
|            | Ca(ICC2/PI489777)SNP_00912 | 295  | A | T | 23 | 6  | -- | -- |
|            | Ca(ICC2/PI489777)SNP_00913 | 733  | G | A | 11 | 12 | -- | -- |
|            | Ca(ICC2/PI489777)SNP_00914 | 1258 | G | A | 5  | 4  | -- | -- |
| CakTC35984 | Ca(ICC2/PI489777)SNP_00915 | 746  | G | A | 6  | 3  | -- | -- |
| CakTC25140 | Ca(ICC2/PI489777)SNP_00916 | 522  | C | T | 8  | 8  | -- | -- |
| CakTC33479 | Ca(ICC2/PI489777)SNP_00917 | 255  | G | A | 7  | 3  | -- | -- |
|            | Ca(ICC2/PI489777)SNP_00918 | 263  | T | A | 7  | 3  | -- | -- |
|            | Ca(ICC2/PI489777)SNP_00919 | 279  | A | G | 6  | 3  | -- | -- |
|            | Ca(ICC2/PI489777)SNP_00920 | 371  | T | A | 5  | 3  | -- | -- |
|            | Ca(ICC2/PI489777)SNP_00921 | 372  | A | C | 5  | 3  | -- | -- |
|            | Ca(ICC2/PI489777)SNP_00922 | 392  | T | C | 3  | 3  | -- | -- |
| CakTC34810 | Ca(ICC2/PI489777)SNP_00923 | 733  | G | A | 7  | 7  | -- | -- |
|            | Ca(ICC2/PI489777)SNP_00924 | 1531 | T | G | 10 | 9  | -- | -- |
|            | Ca(ICC2/PI489777)SNP_00925 | 1939 | T | C | 3  | 6  | -- | -- |
|            | Ca(ICC2/PI489777)SNP_00926 | 3028 | C | T | 10 | 6  | -- | -- |
| CakTC10524 | Ca(ICC2/PI489777)SNP_00927 | 384  | T | A | 10 | 3  | -- | -- |
| CakTC43195 | Ca(ICC2/PI489777)SNP_00928 | 1033 | A | G | 5  | 6  | -- | -- |
|            | Ca(ICC2/PI489777)SNP_00929 | 1126 | A | T | 6  | 4  | -- | -- |
|            | Ca(ICC2/PI489777)SNP_00930 | 1167 | C | T | 6  | 4  | -- | -- |
|            | Ca(ICC2/PI489777)SNP_00931 | 1183 | A | G | 6  | 3  | -- | -- |
|            | Ca(ICC2/PI489777)SNP_00932 | 1300 | T | C | 6  | 4  | -- | -- |
|            | Ca(ICC2/PI489777)SNP_00933 | 1637 | G | A | 15 | 3  | -- | -- |
|            | Ca(ICC2/PI489777)SNP_00934 | 1648 | A | T | 15 | 3  | -- | -- |
|            | Ca(ICC2/PI489777)SNP_00935 | 1667 | G | A | 14 | 3  | -- | -- |
| CakTC09942 | Ca(ICC2/PI489777)SNP_00936 | 678  | T | C | 8  | 3  | -- | -- |
|            | Ca(ICC2/PI489777)SNP_00937 | 885  | T | A | 14 | 5  | -- | -- |
|            | Ca(ICC2/PI489777)SNP_00938 | 1363 | T | G | 6  | 3  | -- | -- |
| CakTC30887 | Ca(ICC2/PI489777)SNP_00939 | 115  | G | A | 10 | 12 | -- | -- |
|            | Ca(ICC2/PI489777)SNP_00940 | 226  | A | G | 12 | 13 | -- | -- |
|            | Ca(ICC2/PI489777)SNP_00941 | 312  | G | T | 13 | 14 | -- | -- |
|            | Ca(ICC2/PI489777)SNP_00942 | 757  | G | A | 13 | 5  | -- | -- |
|            | Ca(ICC2/PI489777)SNP_00943 | 1036 | C | T | 18 | 6  | -- | -- |
|            | Ca(ICC2/PI489777)SNP_00944 | 1582 | G | A | 10 | 7  | -- | -- |
|            | Ca(ICC2/PI489777)SNP_00945 | 1632 | T | G | 13 | 6  | -- | -- |
|            | Ca(ICC2/PI489777)SNP_00946 | 1678 | T | C | 16 | 6  | -- | -- |
|            | Ca(ICC2/PI489777)SNP_00947 | 1891 | G | A | 23 | 7  | -- | -- |
|            | Ca(ICC2/PI489777)SNP_00948 | 2038 | T | C | 11 | 5  | -- | -- |
|            | Ca(ICC2/PI489777)SNP_00949 | 2044 | A | T | 12 | 3  | -- | -- |
|            | Ca(ICC2/PI489777)SNP_00950 | 2449 | G | A | 8  | 4  | -- | -- |
|            | Ca(ICC2/PI489777)SNP_00951 | 2458 | G | A | 6  | 4  | -- | -- |
| CakTC33083 | Ca(ICC2/PI489777)SNP_00952 | 168  | C | G | 9  | 4  | -- | -- |
|            | Ca(ICC2/PI489777)SNP_00953 | 390  | C | G | 16 | 4  | -- | -- |
|            | Ca(ICC2/PI489777)SNP_00954 | 488  | A | T | 16 | 3  | -- | -- |
| CakTC26481 | Ca(ICC2/PI489777)SNP_00955 | 110  | C | T | 12 | 3  | -- | -- |
|            | Ca(ICC2/PI489777)SNP_00956 | 271  | A | G | 19 | 6  | -- | -- |
|            | Ca(ICC2/PI489777)SNP_00957 | 1562 | T | G | 16 | 8  | -- | -- |

|            |                            |      |   |   |     |    |    |    |
|------------|----------------------------|------|---|---|-----|----|----|----|
|            | Ca(ICC2/PI489777)SNP_00958 | 1598 | T | A | 16  | 8  | -- | -- |
|            | Ca(ICC2/PI489777)SNP_00959 | 1975 | G | C | 7   | 12 | -- | -- |
|            | Ca(ICC2/PI489777)SNP_00960 | 2057 | C | T | 4   | 14 | -- | -- |
|            | Ca(ICC2/PI489777)SNP_00961 | 2192 | T | C | 9   | 16 | -- | -- |
|            | Ca(ICC2/PI489777)SNP_00962 | 2269 | T | C | 12  | 5  | -- | -- |
| CakTC41009 | Ca(ICC2/PI489777)SNP_00963 | 1048 | G | A | 168 | 71 | -- | -- |
|            | Ca(ICC2/PI489777)SNP_00964 | 1231 | C | T | 176 | 89 | -- | -- |
|            | Ca(ICC2/PI489777)SNP_00965 | 1850 | G | A | 48  | 46 | -- | -- |
|            | Ca(ICC2/PI489777)SNP_00966 | 1878 | G | C | 40  | 24 | -- | -- |
|            | Ca(ICC2/PI489777)SNP_00967 | 1895 | T | G | 37  | 25 | -- | -- |
| CakTC10985 | Ca(ICC2/PI489777)SNP_00968 | 66   | T | C | 3   | 4  | -- | -- |
|            | Ca(ICC2/PI489777)SNP_00969 | 532  | A | G | 25  | 32 | -- | -- |
| CakTC28500 | Ca(ICC2/PI489777)SNP_00970 | 168  | T | A | 15  | 9  | -- | -- |
|            | Ca(ICC2/PI489777)SNP_00971 | 247  | A | G | 19  | 8  | -- | -- |
|            | Ca(ICC2/PI489777)SNP_00972 | 788  | A | G | 18  | 13 | -- | -- |
|            | Ca(ICC2/PI489777)SNP_00973 | 849  | T | C | 16  | 14 | -- | -- |
|            | Ca(ICC2/PI489777)SNP_00974 | 1407 | C | G | 10  | 5  | -- | -- |
| CakTC31722 | Ca(ICC2/PI489777)SNP_00975 | 741  | T | C | 7   | 11 | -- | -- |
| CakTC43288 | Ca(ICC2/PI489777)SNP_00976 | 209  | A | G | 18  | 3  | -- | -- |
|            | Ca(ICC2/PI489777)SNP_00977 | 215  | C | T | 18  | 4  | -- | -- |
|            | Ca(ICC2/PI489777)SNP_00978 | 373  | T | C | 18  | 8  | -- | -- |
|            | Ca(ICC2/PI489777)SNP_00979 | 374  | C | G | 18  | 8  | -- | -- |
| CakTC40019 | Ca(ICC2/PI489777)SNP_00980 | 378  | C | T | 6   | 7  | -- | -- |
|            | Ca(ICC2/PI489777)SNP_00981 | 426  | G | A | 6   | 6  | -- | -- |
|            | Ca(ICC2/PI489777)SNP_00982 | 534  | G | A | 5   | 6  | -- | -- |
|            | Ca(ICC2/PI489777)SNP_00983 | 627  | A | G | 7   | 8  | -- | -- |
| CakTC40081 | Ca(ICC2/PI489777)SNP_00984 | 58   | T | C | 6   | 7  | -- | -- |
|            | Ca(ICC2/PI489777)SNP_00985 | 256  | A | T | 29  | 32 | -- | -- |
|            | Ca(ICC2/PI489777)SNP_00986 | 415  | C | T | 32  | 42 | -- | -- |
|            | Ca(ICC2/PI489777)SNP_00987 | 532  | C | T | 26  | 44 | -- | -- |
|            | Ca(ICC2/PI489777)SNP_00988 | 564  | A | G | 28  | 44 | -- | -- |
|            | Ca(ICC2/PI489777)SNP_00989 | 886  | G | A | 22  | 37 | -- | -- |
|            | Ca(ICC2/PI489777)SNP_00990 | 943  | T | A | 22  | 28 | -- | -- |
|            | Ca(ICC2/PI489777)SNP_00991 | 1148 | G | A | 8   | 13 | -- | -- |
|            | Ca(ICC2/PI489777)SNP_00992 | 1181 | G | T | 6   | 9  | -- | -- |
|            | Ca(ICC2/PI489777)SNP_00993 | 1236 | T | G | 5   | 7  | -- | -- |
|            | Ca(ICC2/PI489777)SNP_00994 | 1311 | T | A | 4   | 3  | -- | -- |
| CakTC29867 | Ca(ICC2/PI489777)SNP_00995 | 917  | C | T | 6   | 4  | -- | -- |
|            | Ca(ICC2/PI489777)SNP_00996 | 1043 | T | C | 7   | 3  | -- | -- |
|            | Ca(ICC2/PI489777)SNP_00997 | 1213 | T | C | 13  | 4  | -- | -- |
|            | Ca(ICC2/PI489777)SNP_00998 | 1421 | T | C | 8   | 4  | -- | -- |
| CakTC34335 | Ca(ICC2/PI489777)SNP_00999 | 319  | C | T | 3   | 7  | -- | -- |
|            | Ca(ICC2/PI489777)SNP_01000 | 344  | T | C | 3   | 7  | -- | -- |
| CakTC38355 | Ca(ICC2/PI489777)SNP_01001 | 57   | T | G | 14  | 7  | -- | -- |
|            | Ca(ICC2/PI489777)SNP_01002 | 431  | C | T | 19  | 14 | -- | -- |
|            | Ca(ICC2/PI489777)SNP_01003 | 626  | C | T | 24  | 9  | -- | -- |
| CakTC40278 | Ca(ICC2/PI489777)SNP_01004 | 632  | G | C | 13  | 8  | -- | -- |
| CakTC33551 | Ca(ICC2/PI489777)SNP_01005 | 4707 | A | C | 8   | 4  | -- | -- |
|            | Ca(ICC2/PI489777)SNP_01006 | 4858 | A | G | 6   | 7  | -- | -- |
|            | Ca(ICC2/PI489777)SNP_01007 | 4948 | T | C | 7   | 6  | -- | -- |
|            | Ca(ICC2/PI489777)SNP_01008 | 5118 | T | A | 7   | 7  | -- | -- |
|            | Ca(ICC2/PI489777)SNP_01009 | 5341 | T | C | 9   | 6  | -- | -- |
|            | Ca(ICC2/PI489777)SNP_01010 | 5656 | G | A | 4   | 5  | -- | -- |
|            | Ca(ICC2/PI489777)SNP_01011 | 6647 | C | T | 3   | 4  | -- | -- |
|            | Ca(ICC2/PI489777)SNP_01012 | 6663 | A | T | 4   | 4  | -- | -- |
|            | Ca(ICC2/PI489777)SNP_01013 | 7002 | C | T | 9   | 4  | -- | -- |
|            | Ca(ICC2/PI489777)SNP_01014 | 7476 | A | G | 7   | 3  | -- | -- |
|            | Ca(ICC2/PI489777)SNP_01015 | 7989 | G | A | 5   | 5  | -- | -- |
| CakTC26102 | Ca(ICC2/PI489777)SNP_01016 | 860  | A | T | 22  | 10 | -- | -- |
| CakTC29069 | Ca(ICC2/PI489777)SNP_01017 | 939  | T | C | 5   | 8  | -- | -- |
| CakTC41637 | Ca(ICC2/PI489777)SNP_01018 | 1308 | G | T | 13  | 3  | -- | -- |
|            | Ca(ICC2/PI489777)SNP_01019 | 1385 | T | C | 10  | 3  | -- | -- |
|            | Ca(ICC2/PI489777)SNP_01020 | 1559 | G | A | 16  | 9  | -- | -- |
| CakTC16164 | Ca(ICC2/PI489777)SNP_01021 | 405  | G | T | 3   | 3  | -- | -- |
| CakTC27560 | Ca(ICC2/PI489777)SNP_01022 | 298  | A | G | 8   | 5  | -- | -- |
|            | Ca(ICC2/PI489777)SNP_01023 | 1153 | A | T | 11  | 4  | -- | -- |
|            | Ca(ICC2/PI489777)SNP_01024 | 1159 | G | A | 12  | 3  | -- | -- |
| CakTC39338 | Ca(ICC2/PI489777)SNP_01025 | 616  | T | C | 10  | 10 | -- | -- |
|            | Ca(ICC2/PI489777)SNP_01026 | 1479 | G | A | 6   | 5  | -- | -- |
|            | Ca(ICC2/PI489777)SNP_01027 | 1508 | G | A | 6   | 4  | -- | -- |
| CakTC31277 | Ca(ICC2/PI489777)SNP_01028 | 3755 | G | A | 11  | 3  | -- | -- |
| CakTC40983 | Ca(ICC2/PI489777)SNP_01029 | 318  | T | A | 5   | 5  | -- | -- |
| CakTC02060 | Ca(ICC2/PI489777)SNP_01030 | 229  | G | A | 72  | 51 | -- | -- |
|            | Ca(ICC2/PI489777)SNP_01031 | 230  | T | C | 73  | 51 | -- | -- |

|            |                            |      |   |   |     |    |    |          |
|------------|----------------------------|------|---|---|-----|----|----|----------|
|            | Ca(ICC2/PI489777)SNP_01032 | 326  | G | A | 101 | 57 | -- | --       |
| CakTC42605 | Ca(ICC2/PI489777)SNP_01033 | 493  | C | T | 80  | 33 | -- | --       |
|            | Ca(ICC2/PI489777)SNP_01034 | 725  | G | A | 57  | 16 | -- | --       |
|            | Ca(ICC2/PI489777)SNP_01035 | 734  | T | C | 57  | 16 | -- | --       |
|            | Ca(ICC2/PI489777)SNP_01036 | 864  | A | G | 18  | 3  | -- | --       |
|            | Ca(ICC2/PI489777)SNP_01037 | 910  | C | T | 8   | 4  | -- | --       |
| CakTC34196 | Ca(ICC2/PI489777)SNP_01038 | 345  | C | T | 26  | 10 | -- | --       |
|            | Ca(ICC2/PI489777)SNP_01039 | 367  | G | T | 19  | 9  | -- | --       |
| CakTC43032 | Ca(ICC2/PI489777)SNP_01040 | 277  | A | G | 4   | 5  | -- | --       |
|            | Ca(ICC2/PI489777)SNP_01041 | 1515 | G | T | 12  | 17 | -- | --       |
| CakTC34095 | Ca(ICC2/PI489777)SNP_01042 | 35   | C | T | 4   | 10 | -- | --       |
|            | Ca(ICC2/PI489777)SNP_01043 | 43   | C | T | 4   | 11 | -- | --       |
|            | Ca(ICC2/PI489777)SNP_01044 | 61   | C | T | 6   | 14 | -- | --       |
|            | Ca(ICC2/PI489777)SNP_01045 | 140  | G | A | 6   | 14 | -- | --       |
|            | Ca(ICC2/PI489777)SNP_01046 | 142  | G | A | 7   | 16 | -- | --       |
|            | Ca(ICC2/PI489777)SNP_01047 | 177  | G | A | 8   | 17 | -- | --       |
|            | Ca(ICC2/PI489777)SNP_01048 | 182  | C | T | 9   | 14 | -- | --       |
|            | Ca(ICC2/PI489777)SNP_01049 | 260  | T | C | 9   | 14 | -- | --       |
|            | Ca(ICC2/PI489777)SNP_01050 | 1916 | T | C | 4   | 3  | -- | --       |
| CakTC28858 | Ca(ICC2/PI489777)SNP_01051 | 1120 | G | T | 3   | 5  | -- | --       |
|            | Ca(ICC2/PI489777)SNP_01052 | 1126 | G | A | 3   | 6  | -- | --       |
| CakTC31544 | Ca(ICC2/PI489777)SNP_01053 | 366  | G | C | 3   | 3  | -- | --       |
| CakTC42697 | Ca(ICC2/PI489777)SNP_01054 | 82   | G | A | 5   | 9  | -- | --       |
| CakTC10496 | Ca(ICC2/PI489777)SNP_01055 | 573  | C | T | 6   | 12 | -- | --       |
|            | Ca(ICC2/PI489777)SNP_01056 | 582  | A | G | 7   | 12 | -- | --       |
|            | Ca(ICC2/PI489777)SNP_01057 | 654  | A | G | 5   | 13 | -- | --       |
|            | Ca(ICC2/PI489777)SNP_01058 | 875  | G | A | 3   | 8  | -- | --       |
|            | Ca(ICC2/PI489777)SNP_01059 | 1179 | C | T | 9   | 3  | -- | --       |
| CakTC43095 | Ca(ICC2/PI489777)SNP_01060 | 283  | A | G | 30  | 18 | -- | --       |
|            | Ca(ICC2/PI489777)SNP_01061 | 367  | G | A | 33  | 28 | -- | --       |
|            | Ca(ICC2/PI489777)SNP_01062 | 982  | T | C | 53  | 31 | -- | --       |
|            | Ca(ICC2/PI489777)SNP_01063 | 1666 | A | G | 11  | 13 | -- | --       |
|            | Ca(ICC2/PI489777)SNP_01064 | 1723 | G | C | 8   | 6  | -- | --       |
| CakTC07919 | Ca(ICC2/PI489777)SNP_01065 | 585  | T | C | 3   | 5  | -- | --       |
| CakTC25439 | Ca(ICC2/PI489777)SNP_01066 | 1881 | A | T | 3   | 3  | -- | Jumonji  |
| CakTC15179 | Ca(ICC2/PI489777)SNP_01067 | 543  | C | T | 48  | 17 | -- | --       |
|            | Ca(ICC2/PI489777)SNP_01068 | 845  | A | G | 18  | 3  | -- | --       |
| CakTC39962 | Ca(ICC2/PI489777)SNP_01069 | 918  | T | C | 4   | 3  | -- | --       |
| CakTC28019 | Ca(ICC2/PI489777)SNP_01070 | 720  | G | C | 5   | 3  | -- | C2C2-Dof |
| CakTC29754 | Ca(ICC2/PI489777)SNP_01071 | 955  | G | A | 9   | 9  | -- | --       |
|            | Ca(ICC2/PI489777)SNP_01072 | 1483 | G | A | 5   | 5  | -- | --       |
|            | Ca(ICC2/PI489777)SNP_01073 | 1611 | G | T | 3   | 3  | -- | --       |
|            | Ca(ICC2/PI489777)SNP_01074 | 1636 | T | G | 3   | 4  | -- | --       |
|            | Ca(ICC2/PI489777)SNP_01075 | 1676 | A | G | 4   | 4  | -- | --       |
| CakTC39224 | Ca(ICC2/PI489777)SNP_01076 | 170  | T | C | 5   | 4  | -- | --       |
|            | Ca(ICC2/PI489777)SNP_01077 | 285  | C | G | 7   | 3  | -- | --       |
|            | Ca(ICC2/PI489777)SNP_01078 | 539  | G | A | 22  | 14 | -- | --       |
|            | Ca(ICC2/PI489777)SNP_01079 | 548  | C | G | 16  | 13 | -- | --       |
|            | Ca(ICC2/PI489777)SNP_01080 | 1064 | A | G | 27  | 9  | -- | --       |
|            | Ca(ICC2/PI489777)SNP_01081 | 1148 | C | T | 26  | 12 | -- | --       |
|            | Ca(ICC2/PI489777)SNP_01082 | 1157 | A | C | 27  | 14 | -- | --       |
|            | Ca(ICC2/PI489777)SNP_01083 | 1177 | A | T | 27  | 13 | -- | --       |
|            | Ca(ICC2/PI489777)SNP_01084 | 1250 | T | C | 24  | 10 | -- | --       |
|            | Ca(ICC2/PI489777)SNP_01085 | 1358 | T | G | 25  | 11 | -- | --       |
| CakTC35569 | Ca(ICC2/PI489777)SNP_01086 | 858  | G | A | 39  | 12 | -- | --       |
|            | Ca(ICC2/PI489777)SNP_01087 | 959  | A | G | 25  | 10 | -- | --       |
|            | Ca(ICC2/PI489777)SNP_01088 | 971  | C | G | 23  | 12 | -- | --       |
|            | Ca(ICC2/PI489777)SNP_01089 | 3193 | C | G | 9   | 7  | -- | --       |
| CakTC32952 | Ca(ICC2/PI489777)SNP_01090 | 486  | C | T | 4   | 7  | -- | ARF      |
|            | Ca(ICC2/PI489777)SNP_01091 | 753  | C | T | 6   | 4  | -- | ARF      |
|            | Ca(ICC2/PI489777)SNP_01092 | 856  | C | T | 4   | 6  | -- | ARF      |
|            | Ca(ICC2/PI489777)SNP_01093 | 896  | A | G | 4   | 6  | -- | ARF      |
|            | Ca(ICC2/PI489777)SNP_01094 | 1325 | C | T | 5   | 5  | -- | ARF      |
|            | Ca(ICC2/PI489777)SNP_01095 | 1535 | A | G | 3   | 3  | -- | ARF      |
| CakTC38064 | Ca(ICC2/PI489777)SNP_01096 | 839  | T | C | 4   | 7  | -- | --       |
| CakTC29062 | Ca(ICC2/PI489777)SNP_01097 | 82   | C | A | 7   | 4  | -- | --       |
| CakTC39421 | Ca(ICC2/PI489777)SNP_01098 | 286  | T | C | 10  | 8  | -- | --       |
|            | Ca(ICC2/PI489777)SNP_01099 | 1118 | T | C | 4   | 5  | -- | --       |
| CakTC37879 | Ca(ICC2/PI489777)SNP_01100 | 623  | C | A | 19  | 17 | -- | --       |
|            | Ca(ICC2/PI489777)SNP_01101 | 642  | A | C | 19  | 16 | -- | --       |
|            | Ca(ICC2/PI489777)SNP_01102 | 799  | A | G | 9   | 13 | -- | --       |
| CakTC24103 | Ca(ICC2/PI489777)SNP_01103 | 255  | C | T | 21  | 4  | -- | --       |
|            | Ca(ICC2/PI489777)SNP_01104 | 380  | G | T | 19  | 6  | -- | --       |
|            | Ca(ICC2/PI489777)SNP_01105 | 497  | A | C | 21  | 6  | -- | --       |

|            |                            |      |   |   |    |    |           |         |
|------------|----------------------------|------|---|---|----|----|-----------|---------|
|            | Ca(ICC2/P1489777)SNP_01106 | 632  | G | A | 19 | 5  | --        | --      |
|            | Ca(ICC2/P1489777)SNP_01107 | 917  | T | C | 36 | 9  | --        | --      |
|            | Ca(ICC2/P1489777)SNP_01108 | 1024 | G | A | 36 | 9  | --        | --      |
|            | Ca(ICC2/P1489777)SNP_01109 | 1154 | G | A | 37 | 10 | --        | --      |
|            | Ca(ICC2/P1489777)SNP_01110 | 1427 | T | C | 64 | 13 | --        | --      |
|            | Ca(ICC2/P1489777)SNP_01111 | 1466 | C | T | 70 | 9  | --        | --      |
|            | Ca(ICC2/P1489777)SNP_01112 | 1752 | G | A | 73 | 20 | --        | --      |
|            | Ca(ICC2/P1489777)SNP_01113 | 2069 | G | A | 18 | 11 | --        | --      |
|            | Ca(ICC2/P1489777)SNP_01114 | 2179 | A | G | 31 | 8  | --        | --      |
| CakTC39894 | Ca(ICC2/P1489777)SNP_01115 | 1076 | G | A | 8  | 5  | --        | --      |
|            | Ca(ICC2/P1489777)SNP_01116 | 1080 | T | C | 7  | 5  | --        | --      |
| CakTC31026 | Ca(ICC2/P1489777)SNP_01117 | 875  | T | G | 4  | 5  | --        | ABI3VP1 |
|            | Ca(ICC2/P1489777)SNP_01118 | 954  | C | G | 4  | 6  | --        | ABI3VP1 |
|            | Ca(ICC2/P1489777)SNP_01119 | 1114 | T | A | 3  | 4  | --        | ABI3VP1 |
|            | Ca(ICC2/P1489777)SNP_01120 | 1191 | C | T | 3  | 4  | --        | ABI3VP1 |
| CakTC34888 | Ca(ICC2/P1489777)SNP_01121 | 267  | A | G | 9  | 3  | --        | CAMTA   |
|            | Ca(ICC2/P1489777)SNP_01122 | 1180 | C | T | 11 | 4  | --        | CAMTA   |
|            | Ca(ICC2/P1489777)SNP_01123 | 1458 | A | G | 12 | 4  | --        | CAMTA   |
|            | Ca(ICC2/P1489777)SNP_01124 | 2497 | G | T | 25 | 11 | --        | CAMTA   |
|            | Ca(ICC2/P1489777)SNP_01125 | 2621 | A | G | 31 | 14 | --        | CAMTA   |
| CakTC12315 | Ca(ICC2/P1489777)SNP_01126 | 368  | G | C | 4  | 4  | --        | --      |
| CakTC30614 | Ca(ICC2/P1489777)SNP_01127 | 552  | C | T | 12 | 5  | --        | --      |
| CakTC42321 | Ca(ICC2/P1489777)SNP_01128 | 93   | G | T | 5  | 3  | Root      | --      |
|            | Ca(ICC2/P1489777)SNP_01129 | 391  | C | G | 6  | 19 | Root      | --      |
|            | Ca(ICC2/P1489777)SNP_01130 | 443  | G | A | 11 | 18 | Root      | --      |
|            | Ca(ICC2/P1489777)SNP_01131 | 561  | T | C | 4  | 17 | Root      | --      |
| CakTC26989 | Ca(ICC2/P1489777)SNP_01132 | 285  | G | C | 11 | 10 | --        | --      |
|            | Ca(ICC2/P1489777)SNP_01133 | 530  | G | T | 19 | 13 | --        | --      |
|            | Ca(ICC2/P1489777)SNP_01134 | 593  | A | G | 19 | 15 | --        | --      |
|            | Ca(ICC2/P1489777)SNP_01135 | 647  | T | C | 18 | 14 | --        | --      |
|            | Ca(ICC2/P1489777)SNP_01136 | 1331 | G | A | 26 | 19 | --        | --      |
|            | Ca(ICC2/P1489777)SNP_01137 | 1413 | C | A | 22 | 15 | --        | --      |
|            | Ca(ICC2/P1489777)SNP_01138 | 1428 | A | T | 18 | 16 | --        | --      |
|            | Ca(ICC2/P1489777)SNP_01139 | 2711 | C | T | 27 | 9  | --        | --      |
|            | Ca(ICC2/P1489777)SNP_01140 | 2780 | A | C | 27 | 9  | --        | --      |
|            | Ca(ICC2/P1489777)SNP_01141 | 2789 | A | C | 29 | 10 | --        | --      |
| CakTC32300 | Ca(ICC2/P1489777)SNP_01142 | 326  | G | A | 3  | 3  | --        | --      |
| CakTC42751 | Ca(ICC2/P1489777)SNP_01143 | 852  | A | C | 6  | 5  | --        | --      |
| CakTC32122 | Ca(ICC2/P1489777)SNP_01144 | 471  | A | G | 5  | 4  | --        | WRKY    |
|            | Ca(ICC2/P1489777)SNP_01145 | 552  | A | T | 4  | 4  | --        | WRKY    |
|            | Ca(ICC2/P1489777)SNP_01146 | 1204 | G | A | 5  | 4  | --        | WRKY    |
| CakTC23770 | Ca(ICC2/P1489777)SNP_01147 | 271  | G | A | 11 | 6  | --        | --      |
|            | Ca(ICC2/P1489777)SNP_01148 | 461  | G | C | 17 | 8  | --        | --      |
|            | Ca(ICC2/P1489777)SNP_01149 | 2403 | C | A | 13 | 3  | --        | --      |
|            | Ca(ICC2/P1489777)SNP_01150 | 2445 | C | T | 15 | 5  | --        | --      |
|            | Ca(ICC2/P1489777)SNP_01151 | 2453 | A | G | 14 | 5  | --        | --      |
| CakTC02306 | Ca(ICC2/P1489777)SNP_01152 | 1198 | T | G | 3  | 5  | --        | --      |
| CakTC03418 | Ca(ICC2/P1489777)SNP_01153 | 372  | T | C | 11 | 4  | --        | --      |
| CakTC09734 | Ca(ICC2/P1489777)SNP_01154 | 2160 | A | G | 3  | 4  | --        | --      |
| CakTC09507 | Ca(ICC2/P1489777)SNP_01155 | 3641 | G | T | 6  | 4  | Young_pod | --      |
|            | Ca(ICC2/P1489777)SNP_01156 | 3654 | T | C | 6  | 4  | Young_pod | --      |
| CakTC40516 | Ca(ICC2/P1489777)SNP_01157 | 390  | A | T | 8  | 6  | --        | --      |
|            | Ca(ICC2/P1489777)SNP_01158 | 401  | G | C | 7  | 5  | --        | --      |
|            | Ca(ICC2/P1489777)SNP_01159 | 604  | A | G | 5  | 4  | --        | --      |
|            | Ca(ICC2/P1489777)SNP_01160 | 608  | G | A | 5  | 4  | --        | --      |
|            | Ca(ICC2/P1489777)SNP_01161 | 633  | C | T | 3  | 3  | --        | --      |
| CakTC35510 | Ca(ICC2/P1489777)SNP_01162 | 2275 | A | G | 14 | 14 | --        | --      |
| CakTC22858 | Ca(ICC2/P1489777)SNP_01163 | 171  | A | G | 3  | 3  | --        | --      |
| CakTC37312 | Ca(ICC2/P1489777)SNP_01164 | 28   | G | A | 4  | 3  | --        | --      |
|            | Ca(ICC2/P1489777)SNP_01165 | 217  | A | G | 8  | 4  | --        | --      |
|            | Ca(ICC2/P1489777)SNP_01166 | 361  | T | A | 12 | 8  | --        | --      |
|            | Ca(ICC2/P1489777)SNP_01167 | 971  | A | G | 33 | 15 | --        | --      |
|            | Ca(ICC2/P1489777)SNP_01168 | 1414 | T | G | 15 | 17 | --        | --      |
|            | Ca(ICC2/P1489777)SNP_01169 | 1525 | A | G | 11 | 17 | --        | --      |
|            | Ca(ICC2/P1489777)SNP_01170 | 1729 | C | T | 5  | 4  | --        | --      |
|            | Ca(ICC2/P1489777)SNP_01171 | 1779 | T | A | 3  | 4  | --        | --      |
| CakTC31560 | Ca(ICC2/P1489777)SNP_01172 | 911  | G | C | 15 | 3  | --        | MYB     |
| CakTC34304 | Ca(ICC2/P1489777)SNP_01173 | 631  | C | T | 7  | 7  | --        | --      |
|            | Ca(ICC2/P1489777)SNP_01174 | 1429 | C | A | 13 | 9  | --        | --      |
|            | Ca(ICC2/P1489777)SNP_01175 | 1430 | G | T | 13 | 9  | --        | --      |
|            | Ca(ICC2/P1489777)SNP_01176 | 1516 | C | T | 14 | 12 | --        | --      |
|            | Ca(ICC2/P1489777)SNP_01177 | 2003 | G | C | 6  | 5  | --        | --      |
| CakTC33075 | Ca(ICC2/P1489777)SNP_01178 | 421  | A | C | 6  | 8  | --        | --      |
| CakTC38185 | Ca(ICC2/P1489777)SNP_01179 | 159  | T | A | 20 | 6  | --        | --      |



|            |                            |      |   |   |     |    |    |      |
|------------|----------------------------|------|---|---|-----|----|----|------|
|            | Ca(ICC2/PI489777)SNP_01180 | 280  | T | A | 33  | 8  | -- | --   |
|            | Ca(ICC2/PI489777)SNP_01181 | 416  | G | A | 45  | 7  | -- | --   |
|            | Ca(ICC2/PI489777)SNP_01182 | 770  | A | G | 27  | 8  | -- | --   |
|            | Ca(ICC2/PI489777)SNP_01183 | 1187 | G | C | 45  | 6  | -- | --   |
|            | Ca(ICC2/PI489777)SNP_01184 | 1274 | T | C | 41  | 5  | -- | --   |
| CakTC27864 | Ca(ICC2/PI489777)SNP_01185 | 177  | T | C | 3   | 3  | -- | --   |
| CakTC02200 | Ca(ICC2/PI489777)SNP_01186 | 405  | C | T | 3   | 5  | -- | --   |
| CakTC02389 | Ca(ICC2/PI489777)SNP_01187 | 118  | G | A | 7   | 4  | -- | --   |
| CakTC40581 | Ca(ICC2/PI489777)SNP_01188 | 360  | G | A | 4   | 4  | -- | --   |
|            | Ca(ICC2/PI489777)SNP_01189 | 398  | G | A | 4   | 4  | -- | --   |
| CakTC41970 | Ca(ICC2/PI489777)SNP_01190 | 453  | T | C | 5   | 12 | -- | --   |
|            | Ca(ICC2/PI489777)SNP_01191 | 635  | T | G | 7   | 5  | -- | --   |
| CakTC28322 | Ca(ICC2/PI489777)SNP_01192 | 269  | A | G | 29  | 9  | -- | --   |
|            | Ca(ICC2/PI489777)SNP_01193 | 347  | G | A | 33  | 17 | -- | --   |
|            | Ca(ICC2/PI489777)SNP_01194 | 1154 | A | T | 56  | 44 | -- | --   |
|            | Ca(ICC2/PI489777)SNP_01195 | 1532 | C | G | 13  | 4  | -- | --   |
| CakTC26214 | Ca(ICC2/PI489777)SNP_01196 | 321  | G | T | 95  | 48 | -- | --   |
|            | Ca(ICC2/PI489777)SNP_01197 | 439  | A | T | 112 | 49 | -- | --   |
|            | Ca(ICC2/PI489777)SNP_01198 | 442  | A | T | 113 | 48 | -- | --   |
|            | Ca(ICC2/PI489777)SNP_01199 | 588  | T | A | 88  | 33 | -- | --   |
| CakTC25365 | Ca(ICC2/PI489777)SNP_01200 | 807  | G | A | 15  | 4  | -- | --   |
| CakTC31642 | Ca(ICC2/PI489777)SNP_01201 | 385  | C | A | 13  | 3  | -- | --   |
|            | Ca(ICC2/PI489777)SNP_01202 | 527  | A | G | 13  | 4  | -- | --   |
|            | Ca(ICC2/PI489777)SNP_01203 | 584  | A | G | 13  | 3  | -- | --   |
|            | Ca(ICC2/PI489777)SNP_01204 | 601  | T | C | 16  | 3  | -- | --   |
| CakTC37906 | Ca(ICC2/PI489777)SNP_01205 | 282  | A | G | 15  | 13 | -- | --   |
|            | Ca(ICC2/PI489777)SNP_01206 | 437  | T | C | 16  | 12 | -- | --   |
|            | Ca(ICC2/PI489777)SNP_01207 | 936  | G | A | 14  | 19 | -- | --   |
|            | Ca(ICC2/PI489777)SNP_01208 | 951  | C | T | 15  | 18 | -- | --   |
|            | Ca(ICC2/PI489777)SNP_01209 | 978  | A | T | 16  | 17 | -- | --   |
|            | Ca(ICC2/PI489777)SNP_01210 | 1077 | G | A | 8   | 18 | -- | --   |
|            | Ca(ICC2/PI489777)SNP_01211 | 1080 | A | G | 9   | 19 | -- | --   |
| CakTC38600 | Ca(ICC2/PI489777)SNP_01212 | 464  | T | C | 46  | 34 | -- | БНЛН |
| CakTC10066 | Ca(ICC2/PI489777)SNP_01213 | 2356 | T | C | 12  | 3  | -- | --   |
|            | Ca(ICC2/PI489777)SNP_01214 | 2700 | G | T | 5   | 5  | -- | --   |
| CakTC10179 | Ca(ICC2/PI489777)SNP_01215 | 202  | G | C | 9   | 5  | -- | --   |
| CakTC41206 | Ca(ICC2/PI489777)SNP_01216 | 99   | T | C | 4   | 7  | -- | --   |
|            | Ca(ICC2/PI489777)SNP_01217 | 312  | G | A | 7   | 8  | -- | --   |
|            | Ca(ICC2/PI489777)SNP_01218 | 606  | G | T | 7   | 5  | -- | --   |
|            | Ca(ICC2/PI489777)SNP_01219 | 839  | A | G | 7   | 6  | -- | --   |
|            | Ca(ICC2/PI489777)SNP_01220 | 893  | T | C | 10  | 8  | -- | --   |
|            | Ca(ICC2/PI489777)SNP_01221 | 1662 | T | G | 9   | 17 | -- | --   |
|            | Ca(ICC2/PI489777)SNP_01222 | 2087 | A | C | 9   | 9  | -- | --   |
| CakTC35882 | Ca(ICC2/PI489777)SNP_01223 | 549  | G | A | 18  | 40 | -- | --   |
|            | Ca(ICC2/PI489777)SNP_01224 | 1711 | T | C | 15  | 19 | -- | --   |
|            | Ca(ICC2/PI489777)SNP_01225 | 2205 | G | A | 16  | 22 | -- | --   |
|            | Ca(ICC2/PI489777)SNP_01226 | 2352 | A | G | 13  | 11 | -- | --   |
|            | Ca(ICC2/PI489777)SNP_01227 | 2515 | T | G | 10  | 13 | -- | --   |
|            | Ca(ICC2/PI489777)SNP_01228 | 2635 | A | T | 14  | 16 | -- | --   |
|            | Ca(ICC2/PI489777)SNP_01229 | 2741 | C | T | 14  | 17 | -- | --   |
|            | Ca(ICC2/PI489777)SNP_01230 | 3171 | G | T | 10  | 17 | -- | --   |
| CakTC10139 | Ca(ICC2/PI489777)SNP_01231 | 343  | G | A | 20  | 17 | -- | --   |
|            | Ca(ICC2/PI489777)SNP_01232 | 1365 | C | T | 8   | 3  | -- | --   |
|            | Ca(ICC2/PI489777)SNP_01233 | 2157 | T | C | 28  | 3  | -- | --   |
| CakTC25281 | Ca(ICC2/PI489777)SNP_01234 | 731  | C | T | 3   | 5  | -- | --   |
|            | Ca(ICC2/PI489777)SNP_01235 | 822  | C | A | 3   | 6  | -- | --   |
|            | Ca(ICC2/PI489777)SNP_01236 | 1691 | T | A | 50  | 19 | -- | --   |
| CakTC39310 | Ca(ICC2/PI489777)SNP_01237 | 363  | C | G | 27  | 20 | -- | --   |
|            | Ca(ICC2/PI489777)SNP_01238 | 388  | C | G | 26  | 20 | -- | --   |
| CakTC13052 | Ca(ICC2/PI489777)SNP_01239 | 34   | C | G | 40  | 25 | -- | --   |
|            | Ca(ICC2/PI489777)SNP_01240 | 338  | T | C | 65  | 58 | -- | --   |
|            | Ca(ICC2/PI489777)SNP_01241 | 497  | C | T | 52  | 55 | -- | --   |
|            | Ca(ICC2/PI489777)SNP_01242 | 769  | T | C | 82  | 44 | -- | --   |
|            | Ca(ICC2/PI489777)SNP_01243 | 782  | C | T | 74  | 42 | -- | --   |
| CakTC24533 | Ca(ICC2/PI489777)SNP_01244 | 1187 | C | T | 4   | 5  | -- | --   |
|            | Ca(ICC2/PI489777)SNP_01245 | 1933 | C | T | 9   | 5  | -- | --   |
| CakTC25373 | Ca(ICC2/PI489777)SNP_01246 | 622  | G | A | 4   | 3  | -- | --   |
|            | Ca(ICC2/PI489777)SNP_01247 | 625  | C | T | 4   | 3  | -- | --   |
| CakTC40918 | Ca(ICC2/PI489777)SNP_01248 | 55   | C | T | 22  | 17 | -- | --   |
|            | Ca(ICC2/PI489777)SNP_01249 | 617  | C | T | 6   | 13 | -- | --   |
| CakTC39751 | Ca(ICC2/PI489777)SNP_01250 | 1305 | A | G | 11  | 5  | -- | --   |
| CakTC13113 | Ca(ICC2/PI489777)SNP_01251 | 809  | C | G | 15  | 14 | -- | --   |
|            | Ca(ICC2/PI489777)SNP_01252 | 1335 | A | C | 52  | 32 | -- | --   |
|            | Ca(ICC2/PI489777)SNP_01253 | 1370 | T | C | 44  | 43 | -- | --   |

|            |                             |      |   |   |    |    |        |      |
|------------|-----------------------------|------|---|---|----|----|--------|------|
|            | Ca(ICCV2/PI489777)SNP_01254 | 1470 | T | C | 33 | 26 | --     | --   |
|            | Ca(ICCV2/PI489777)SNP_01255 | 1658 | G | A | 4  | 3  | --     | --   |
| CakTC09238 | Ca(ICCV2/PI489777)SNP_01256 | 390  | A | T | 4  | 9  | --     | --   |
| CakTC38840 | Ca(ICCV2/PI489777)SNP_01257 | 1260 | G | T | 6  | 3  | --     | --   |
|            | Ca(ICCV2/PI489777)SNP_01258 | 1648 | G | A | 3  | 3  | --     | --   |
| CakTC34151 | Ca(ICCV2/PI489777)SNP_01259 | 119  | A | G | 3  | 5  | --     | --   |
|            | Ca(ICCV2/PI489777)SNP_01260 | 131  | T | C | 3  | 8  | --     | --   |
|            | Ca(ICCV2/PI489777)SNP_01261 | 241  | C | A | 5  | 7  | --     | --   |
|            | Ca(ICCV2/PI489777)SNP_01262 | 457  | G | C | 5  | 5  | --     | --   |
|            | Ca(ICCV2/PI489777)SNP_01263 | 467  | A | G | 5  | 5  | --     | --   |
|            | Ca(ICCV2/PI489777)SNP_01264 | 500  | G | A | 5  | 4  | --     | --   |
| CakTC31810 | Ca(ICCV2/PI489777)SNP_01265 | 432  | G | A | 7  | 6  | --     | --   |
| CakTC01044 | Ca(ICCV2/PI489777)SNP_01266 | 159  | G | A | 4  | 4  | --     | --   |
| CakTC22950 | Ca(ICCV2/PI489777)SNP_01267 | 27   | A | C | 39 | 13 | --     | --   |
| CakTC22257 | Ca(ICCV2/PI489777)SNP_01268 | 1639 | T | A | 5  | 3  | --     | --   |
| CakTC10193 | Ca(ICCV2/PI489777)SNP_01269 | 575  | G | A | 14 | 6  | --     | --   |
| CakTC17238 | Ca(ICCV2/PI489777)SNP_01270 | 1761 | A | G | 7  | 4  | --     | --   |
| CakTC28413 | Ca(ICCV2/PI489777)SNP_01271 | 193  | C | T | 8  | 3  | --     | --   |
|            | Ca(ICCV2/PI489777)SNP_01272 | 378  | T | C | 19 | 7  | --     | --   |
| CakTC29354 | Ca(ICCV2/PI489777)SNP_01273 | 235  | C | T | 15 | 10 | --     | --   |
|            | Ca(ICCV2/PI489777)SNP_01274 | 442  | T | G | 17 | 24 | --     | --   |
|            | Ca(ICCV2/PI489777)SNP_01275 | 444  | A | G | 17 | 24 | --     | --   |
|            | Ca(ICCV2/PI489777)SNP_01276 | 1644 | G | C | 4  | 4  | --     | --   |
| CakTC27110 | Ca(ICCV2/PI489777)SNP_01277 | 1041 | C | A | 5  | 5  | --     | --   |
|            | Ca(ICCV2/PI489777)SNP_01278 | 3890 | C | T | 4  | 6  | --     | --   |
|            | Ca(ICCV2/PI489777)SNP_01279 | 3984 | A | G | 4  | 6  | --     | --   |
| CakTC40962 | Ca(ICCV2/PI489777)SNP_01280 | 73   | C | T | 40 | 5  | --     | --   |
|            | Ca(ICCV2/PI489777)SNP_01281 | 234  | A | G | 52 | 11 | --     | --   |
|            | Ca(ICCV2/PI489777)SNP_01282 | 388  | T | C | 41 | 15 | --     | --   |
|            | Ca(ICCV2/PI489777)SNP_01283 | 406  | T | A | 14 | 14 | --     | --   |
|            | Ca(ICCV2/PI489777)SNP_01284 | 451  | C | T | 8  | 13 | --     | --   |
|            | Ca(ICCV2/PI489777)SNP_01285 | 523  | C | T | 7  | 11 | --     | --   |
| CakTC41534 | Ca(ICCV2/PI489777)SNP_01286 | 649  | G | A | 3  | 3  | --     | --   |
| CakTC26247 | Ca(ICCV2/PI489777)SNP_01287 | 487  | G | C | 4  | 3  | Root   | --   |
| CakTC39625 | Ca(ICCV2/PI489777)SNP_01288 | 336  | G | C | 17 | 5  | --     | --   |
|            | Ca(ICCV2/PI489777)SNP_01289 | 410  | T | C | 21 | 5  | --     | --   |
|            | Ca(ICCV2/PI489777)SNP_01290 | 588  | C | T | 24 | 5  | --     | --   |
|            | Ca(ICCV2/PI489777)SNP_01291 | 656  | G | C | 29 | 5  | --     | --   |
| CakTC39195 | Ca(ICCV2/PI489777)SNP_01292 | 497  | A | G | 5  | 4  | --     | --   |
| CakTC28724 | Ca(ICCV2/PI489777)SNP_01293 | 76   | T | C | 8  | 3  | --     | --   |
|            | Ca(ICCV2/PI489777)SNP_01294 | 310  | C | T | 14 | 10 | --     | --   |
| CakTC34330 | Ca(ICCV2/PI489777)SNP_01295 | 115  | T | A | 5  | 6  | Flower | bud  |
|            | Ca(ICCV2/PI489777)SNP_01296 | 127  | T | C | 7  | 6  | Flower | bud  |
| CakTC11406 | Ca(ICCV2/PI489777)SNP_01297 | 853  | A | G | 10 | 7  | --     | --   |
|            | Ca(ICCV2/PI489777)SNP_01298 | 975  | G | A | 10 | 7  | --     | --   |
| CakTC10222 | Ca(ICCV2/PI489777)SNP_01299 | 809  | A | G | 10 | 5  | --     | bHLH |
|            | Ca(ICCV2/PI489777)SNP_01300 | 938  | G | A | 10 | 6  | --     | bHLH |
| CakTC27984 | Ca(ICCV2/PI489777)SNP_01301 | 320  | G | T | 8  | 3  | --     | --   |
|            | Ca(ICCV2/PI489777)SNP_01302 | 1950 | G | A | 28 | 9  | --     | --   |
|            | Ca(ICCV2/PI489777)SNP_01303 | 1989 | T | C | 19 | 4  | --     | --   |
|            | Ca(ICCV2/PI489777)SNP_01304 | 2172 | T | C | 29 | 4  | --     | --   |
|            | Ca(ICCV2/PI489777)SNP_01305 | 2203 | G | A | 25 | 4  | --     | --   |
|            | Ca(ICCV2/PI489777)SNP_01306 | 2241 | C | T | 29 | 7  | --     | --   |
|            | Ca(ICCV2/PI489777)SNP_01307 | 2248 | C | T | 32 | 8  | --     | --   |
|            | Ca(ICCV2/PI489777)SNP_01308 | 2275 | G | T | 30 | 6  | --     | --   |
|            | Ca(ICCV2/PI489777)SNP_01309 | 2292 | G | A | 25 | 4  | --     | --   |
|            | Ca(ICCV2/PI489777)SNP_01310 | 2975 | A | G | 5  | 3  | --     | --   |
| CakTC34023 | Ca(ICCV2/PI489777)SNP_01311 | 616  | T | C | 5  | 3  | --     | --   |
| CakTC11446 | Ca(ICCV2/PI489777)SNP_01312 | 392  | T | C | 9  | 7  | --     | --   |
| CakTC30185 | Ca(ICCV2/PI489777)SNP_01313 | 854  | G | C | 11 | 3  | --     | --   |
|            | Ca(ICCV2/PI489777)SNP_01314 | 1098 | A | G | 14 | 8  | --     | --   |
|            | Ca(ICCV2/PI489777)SNP_01315 | 1132 | A | G | 14 | 8  | --     | --   |
|            | Ca(ICCV2/PI489777)SNP_01316 | 1156 | A | G | 13 | 6  | --     | --   |
|            | Ca(ICCV2/PI489777)SNP_01317 | 1296 | G | A | 6  | 5  | --     | --   |
|            | Ca(ICCV2/PI489777)SNP_01318 | 1309 | C | A | 6  | 5  | --     | --   |
| CakTC20170 | Ca(ICCV2/PI489777)SNP_01319 | 325  | C | T | 4  | 3  | --     | --   |
|            | Ca(ICCV2/PI489777)SNP_01320 | 340  | T | C | 4  | 3  | --     | --   |
| CakTC25460 | Ca(ICCV2/PI489777)SNP_01321 | 1980 | T | C | 8  | 3  | --     | --   |
| CakTC23209 | Ca(ICCV2/PI489777)SNP_01322 | 1159 | T | C | 5  | 5  | --     | --   |
| CakTC36550 | Ca(ICCV2/PI489777)SNP_01323 | 1431 | G | A | 3  | 4  | --     | --   |
|            | Ca(ICCV2/PI489777)SNP_01324 | 1697 | G | T | 4  | 3  | --     | --   |
|            | Ca(ICCV2/PI489777)SNP_01325 | 2352 | T | A | 3  | 5  | --     | --   |
|            | Ca(ICCV2/PI489777)SNP_01326 | 2445 | T | A | 3  | 7  | --     | --   |
| CakTC32536 | Ca(ICCV2/PI489777)SNP_01327 | 187  | T | G | 9  | 4  | --     | --   |

|            |                            |      |   |   |    |    |       |           |
|------------|----------------------------|------|---|---|----|----|-------|-----------|
|            | Ca(ICC2/PI489777)SNP_01328 | 214  | T | C | 9  | 4  | --    | --        |
|            | Ca(ICC2/PI489777)SNP_01329 | 264  | C | G | 7  | 4  | --    | --        |
| CakTC38998 | Ca(ICC2/PI489777)SNP_01330 | 1396 | A | G | 19 | 5  | --    | --        |
|            | Ca(ICC2/PI489777)SNP_01331 | 1460 | C | A | 13 | 4  | --    | --        |
|            | Ca(ICC2/PI489777)SNP_01332 | 2002 | G | A | 19 | 10 | --    | --        |
|            | Ca(ICC2/PI489777)SNP_01333 | 2014 | T | A | 19 | 11 | --    | --        |
|            | Ca(ICC2/PI489777)SNP_01334 | 2044 | G | A | 18 | 10 | --    | --        |
|            | Ca(ICC2/PI489777)SNP_01335 | 2048 | C | A | 18 | 12 | --    | --        |
|            | Ca(ICC2/PI489777)SNP_01336 | 2059 | A | G | 18 | 12 | --    | --        |
|            | Ca(ICC2/PI489777)SNP_01337 | 2098 | T | G | 16 | 9  | --    | --        |
|            | Ca(ICC2/PI489777)SNP_01338 | 2230 | T | A | 3  | 11 | --    | --        |
|            | Ca(ICC2/PI489777)SNP_01339 | 2271 | A | C | 4  | 9  | --    | --        |
|            | Ca(ICC2/PI489777)SNP_01340 | 2374 | T | G | 4  | 9  | --    | --        |
|            | Ca(ICC2/PI489777)SNP_01341 | 2398 | C | G | 3  | 9  | --    | --        |
| CakTC29687 | Ca(ICC2/PI489777)SNP_01342 | 1373 | T | G | 6  | 6  | --    | --        |
| CakTC26820 | Ca(ICC2/PI489777)SNP_01343 | 177  | C | T | 4  | 4  | --    | --        |
|            | Ca(ICC2/PI489777)SNP_01344 | 363  | C | G | 10 | 8  | --    | --        |
|            | Ca(ICC2/PI489777)SNP_01345 | 420  | A | G | 11 | 7  | --    | --        |
| CakTC37946 | Ca(ICC2/PI489777)SNP_01346 | 808  | A | G | 17 | 8  | --    | --        |
| CakTC26749 | Ca(ICC2/PI489777)SNP_01347 | 740  | C | G | 11 | 5  | --    | --        |
|            | Ca(ICC2/PI489777)SNP_01348 | 781  | C | A | 10 | 3  | --    | --        |
|            | Ca(ICC2/PI489777)SNP_01349 | 929  | T | C | 8  | 3  | --    | --        |
| CakTC14664 | Ca(ICC2/PI489777)SNP_01350 | 670  | G | A | 6  | 3  | --    | --        |
| CakTC28538 | Ca(ICC2/PI489777)SNP_01351 | 2401 | C | G | 8  | 5  | Shoot | --        |
| CakTC42379 | Ca(ICC2/PI489777)SNP_01352 | 261  | T | C | 6  | 4  | --    | --        |
| CakTC25152 | Ca(ICC2/PI489777)SNP_01353 | 2142 | C | T | 22 | 13 | --    | --        |
| CakTC41285 | Ca(ICC2/PI489777)SNP_01354 | 153  | C | T | 4  | 5  | --    | --        |
| CakTC37711 | Ca(ICC2/PI489777)SNP_01355 | 146  | A | G | 8  | 9  | --    | --        |
|            | Ca(ICC2/PI489777)SNP_01356 | 234  | T | C | 14 | 12 | --    | --        |
|            | Ca(ICC2/PI489777)SNP_01357 | 248  | T | C | 10 | 13 | --    | --        |
|            | Ca(ICC2/PI489777)SNP_01358 | 300  | G | A | 13 | 13 | --    | --        |
|            | Ca(ICC2/PI489777)SNP_01359 | 435  | C | T | 14 | 13 | --    | --        |
|            | Ca(ICC2/PI489777)SNP_01360 | 525  | A | C | 14 | 10 | --    | --        |
|            | Ca(ICC2/PI489777)SNP_01361 | 681  | A | C | 17 | 3  | --    | --        |
|            | Ca(ICC2/PI489777)SNP_01362 | 855  | A | T | 14 | 5  | --    | --        |
|            | Ca(ICC2/PI489777)SNP_01363 | 866  | C | T | 17 | 6  | --    | --        |
|            | Ca(ICC2/PI489777)SNP_01364 | 1209 | C | T | 16 | 10 | --    | --        |
|            | Ca(ICC2/PI489777)SNP_01365 | 1425 | T | C | 13 | 7  | --    | --        |
|            | Ca(ICC2/PI489777)SNP_01366 | 1544 | C | G | 13 | 3  | --    | --        |
| CakTC32238 | Ca(ICC2/PI489777)SNP_01367 | 932  | T | C | 4  | 3  | Root  | --        |
|            | Ca(ICC2/PI489777)SNP_01368 | 934  | G | C | 6  | 4  | Root  | --        |
|            | Ca(ICC2/PI489777)SNP_01369 | 1135 | C | T | 7  | 5  | Root  | --        |
| CakTC36895 | Ca(ICC2/PI489777)SNP_01370 | 628  | G | A | 12 | 5  | --    | --        |
|            | Ca(ICC2/PI489777)SNP_01371 | 1264 | G | A | 3  | 8  | --    | --        |
|            | Ca(ICC2/PI489777)SNP_01372 | 1292 | A | G | 4  | 8  | --    | --        |
|            | Ca(ICC2/PI489777)SNP_01373 | 1411 | G | A | 4  | 3  | --    | --        |
| CakTC23347 | Ca(ICC2/PI489777)SNP_01374 | 999  | C | G | 5  | 13 | --    | --        |
|            | Ca(ICC2/PI489777)SNP_01375 | 1002 | T | G | 3  | 13 | --    | --        |
| CakTC36676 | Ca(ICC2/PI489777)SNP_01376 | 308  | A | G | 3  | 5  | --    | --        |
| CakTC11615 | Ca(ICC2/PI489777)SNP_01377 | 98   | C | T | 3  | 4  | --    | --        |
|            | Ca(ICC2/PI489777)SNP_01378 | 102  | G | A | 3  | 4  | --    | --        |
|            | Ca(ICC2/PI489777)SNP_01379 | 109  | A | T | 3  | 5  | --    | --        |
|            | Ca(ICC2/PI489777)SNP_01380 | 208  | G | A | 9  | 6  | --    | --        |
|            | Ca(ICC2/PI489777)SNP_01381 | 326  | A | C | 9  | 6  | --    | --        |
|            | Ca(ICC2/PI489777)SNP_01382 | 460  | T | C | 12 | 6  | --    | --        |
|            | Ca(ICC2/PI489777)SNP_01383 | 609  | C | G | 12 | 10 | --    | --        |
|            | Ca(ICC2/PI489777)SNP_01384 | 659  | T | C | 14 | 7  | --    | --        |
| CakTC24822 | Ca(ICC2/PI489777)SNP_01385 | 67   | G | A | 4  | 4  | --    | --        |
| CakTC32202 | Ca(ICC2/PI489777)SNP_01386 | 231  | T | C | 7  | 3  | --    | --        |
|            | Ca(ICC2/PI489777)SNP_01387 | 379  | A | G | 9  | 7  | --    | --        |
|            | Ca(ICC2/PI489777)SNP_01388 | 488  | G | C | 12 | 8  | --    | --        |
|            | Ca(ICC2/PI489777)SNP_01389 | 679  | T | A | 14 | 6  | --    | --        |
|            | Ca(ICC2/PI489777)SNP_01390 | 682  | T | G | 13 | 6  | --    | --        |
|            | Ca(ICC2/PI489777)SNP_01391 | 1131 | G | C | 19 | 5  | --    | --        |
| CakTC28456 | Ca(ICC2/PI489777)SNP_01392 | 471  | G | T | 3  | 3  | --    | AP2-EREBP |
| CakTC10127 | Ca(ICC2/PI489777)SNP_01393 | 327  | A | G | 9  | 6  | --    | --        |
|            | Ca(ICC2/PI489777)SNP_01394 | 690  | A | G | 3  | 3  | --    | --        |
| CakTC41663 | Ca(ICC2/PI489777)SNP_01395 | 417  | A | G | 14 | 13 | --    | --        |
|            | Ca(ICC2/PI489777)SNP_01396 | 2270 | C | G | 8  | 5  | --    | --        |
| CakTC24531 | Ca(ICC2/PI489777)SNP_01397 | 693  | A | G | 32 | 10 | Shoot | --        |
| CakTC29858 | Ca(ICC2/PI489777)SNP_01398 | 707  | G | T | 10 | 5  | --    | --        |
|            | Ca(ICC2/PI489777)SNP_01399 | 778  | T | A | 7  | 4  | --    | --        |
|            | Ca(ICC2/PI489777)SNP_01400 | 927  | G | A | 9  | 6  | --    | --        |
|            | Ca(ICC2/PI489777)SNP_01401 | 949  | T | C | 10 | 6  | --    | --        |

|            |                             |      |   |   |     |     |    |     |
|------------|-----------------------------|------|---|---|-----|-----|----|-----|
|            | Ca(ICCV2/PI489777)SNP_01402 | 966  | G | A | 9   | 5   | -- | --  |
|            | Ca(ICCV2/PI489777)SNP_01403 | 2189 | T | C | 17  | 19  | -- | --  |
|            | Ca(ICCV2/PI489777)SNP_01404 | 2515 | T | A | 13  | 9   | -- | --  |
|            | Ca(ICCV2/PI489777)SNP_01405 | 2851 | G | T | 6   | 8   | -- | --  |
| CakTC24186 | Ca(ICCV2/PI489777)SNP_01406 | 374  | A | T | 63  | 35  | -- | --  |
|            | Ca(ICCV2/PI489777)SNP_01407 | 1390 | A | C | 10  | 8   | -- | --  |
|            | Ca(ICCV2/PI489777)SNP_01408 | 1804 | G | C | 16  | 10  | -- | --  |
|            | Ca(ICCV2/PI489777)SNP_01409 | 1853 | C | T | 16  | 13  | -- | --  |
|            | Ca(ICCV2/PI489777)SNP_01410 | 2075 | A | G | 17  | 19  | -- | --  |
|            | Ca(ICCV2/PI489777)SNP_01411 | 2143 | A | G | 16  | 19  | -- | --  |
|            | Ca(ICCV2/PI489777)SNP_01412 | 2977 | G | C | 26  | 11  | -- | --  |
|            | Ca(ICCV2/PI489777)SNP_01413 | 3148 | G | A | 34  | 11  | -- | --  |
|            | Ca(ICCV2/PI489777)SNP_01414 | 3701 | T | A | 26  | 21  | -- | --  |
|            | Ca(ICCV2/PI489777)SNP_01415 | 4127 | A | G | 31  | 7   | -- | --  |
|            | Ca(ICCV2/PI489777)SNP_01416 | 4339 | C | T | 24  | 12  | -- | --  |
|            | Ca(ICCV2/PI489777)SNP_01417 | 4720 | A | G | 36  | 24  | -- | --  |
|            | Ca(ICCV2/PI489777)SNP_01418 | 6241 | T | C | 43  | 30  | -- | --  |
|            | Ca(ICCV2/PI489777)SNP_01419 | 6660 | G | A | 44  | 16  | -- | --  |
|            | Ca(ICCV2/PI489777)SNP_01420 | 7222 | G | A | 55  | 18  | -- | --  |
|            | Ca(ICCV2/PI489777)SNP_01421 | 8179 | G | A | 40  | 12  | -- | --  |
| CakTC43153 | Ca(ICCV2/PI489777)SNP_01422 | 1374 | G | A | 34  | 15  | -- | --  |
|            | Ca(ICCV2/PI489777)SNP_01423 | 1482 | T | A | 34  | 11  | -- | --  |
|            | Ca(ICCV2/PI489777)SNP_01424 | 1718 | G | C | 25  | 5   | -- | --  |
|            | Ca(ICCV2/PI489777)SNP_01425 | 1741 | A | T | 21  | 5   | -- | --  |
|            | Ca(ICCV2/PI489777)SNP_01426 | 1757 | T | C | 20  | 5   | -- | --  |
| CakTC40164 | Ca(ICCV2/PI489777)SNP_01427 | 172  | A | G | 74  | 138 | -- | --  |
|            | Ca(ICCV2/PI489777)SNP_01428 | 187  | A | T | 74  | 140 | -- | --  |
| CakTC27334 | Ca(ICCV2/PI489777)SNP_01429 | 963  | T | A | 100 | 39  | -- | C3H |
|            | Ca(ICCV2/PI489777)SNP_01430 | 975  | A | T | 146 | 41  | -- | C3H |
|            | Ca(ICCV2/PI489777)SNP_01431 | 1116 | C | A | 157 | 57  | -- | C3H |
|            | Ca(ICCV2/PI489777)SNP_01432 | 1122 | T | C | 170 | 55  | -- | C3H |
|            | Ca(ICCV2/PI489777)SNP_01433 | 1629 | C | T | 99  | 35  | -- | C3H |
|            | Ca(ICCV2/PI489777)SNP_01434 | 1743 | G | A | 112 | 21  | -- | C3H |
| CakTC36513 | Ca(ICCV2/PI489777)SNP_01435 | 5    | G | C | 3   | 14  | -- | --  |
|            | Ca(ICCV2/PI489777)SNP_01436 | 154  | T | G | 6   | 16  | -- | --  |
|            | Ca(ICCV2/PI489777)SNP_01437 | 319  | T | G | 5   | 15  | -- | --  |
|            | Ca(ICCV2/PI489777)SNP_01438 | 1242 | T | G | 7   | 10  | -- | --  |
| CakTC34908 | Ca(ICCV2/PI489777)SNP_01439 | 621  | G | T | 13  | 24  | -- | --  |
|            | Ca(ICCV2/PI489777)SNP_01440 | 649  | T | A | 13  | 30  | -- | --  |
|            | Ca(ICCV2/PI489777)SNP_01441 | 691  | T | C | 16  | 29  | -- | --  |
|            | Ca(ICCV2/PI489777)SNP_01442 | 1606 | C | T | 26  | 6   | -- | --  |
|            | Ca(ICCV2/PI489777)SNP_01443 | 2230 | T | C | 11  | 11  | -- | --  |
|            | Ca(ICCV2/PI489777)SNP_01444 | 3298 | G | A | 6   | 8   | -- | --  |
|            | Ca(ICCV2/PI489777)SNP_01445 | 3370 | A | G | 6   | 7   | -- | --  |
|            | Ca(ICCV2/PI489777)SNP_01446 | 3386 | T | C | 6   | 6   | -- | --  |
|            | Ca(ICCV2/PI489777)SNP_01447 | 3397 | G | A | 6   | 6   | -- | --  |
|            | Ca(ICCV2/PI489777)SNP_01448 | 3514 | G | A | 7   | 3   | -- | --  |
| CakTC13632 | Ca(ICCV2/PI489777)SNP_01449 | 640  | A | C | 29  | 12  | -- | --  |
| CakTC40661 | Ca(ICCV2/PI489777)SNP_01450 | 125  | C | T | 87  | 41  | -- | --  |
| CakTC36263 | Ca(ICCV2/PI489777)SNP_01451 | 1089 | C | T | 36  | 9   | -- | --  |
|            | Ca(ICCV2/PI489777)SNP_01452 | 1116 | T | C | 34  | 8   | -- | --  |
| CakTC32959 | Ca(ICCV2/PI489777)SNP_01453 | 1291 | T | A | 5   | 14  | -- | --  |
| CakTC34089 | Ca(ICCV2/PI489777)SNP_01454 | 291  | A | G | 7   | 4   | -- | --  |
|            | Ca(ICCV2/PI489777)SNP_01455 | 426  | A | G | 9   | 6   | -- | --  |
|            | Ca(ICCV2/PI489777)SNP_01456 | 732  | C | T | 9   | 9   | -- | --  |
|            | Ca(ICCV2/PI489777)SNP_01457 | 769  | T | C | 7   | 7   | -- | --  |
|            | Ca(ICCV2/PI489777)SNP_01458 | 777  | A | G | 9   | 8   | -- | --  |
|            | Ca(ICCV2/PI489777)SNP_01459 | 816  | G | A | 7   | 11  | -- | --  |
|            | Ca(ICCV2/PI489777)SNP_01460 | 828  | G | T | 8   | 12  | -- | --  |
|            | Ca(ICCV2/PI489777)SNP_01461 | 1527 | A | G | 7   | 7   | -- | --  |
|            | Ca(ICCV2/PI489777)SNP_01462 | 1562 | T | G | 5   | 8   | -- | --  |
| CakTC33746 | Ca(ICCV2/PI489777)SNP_01463 | 940  | A | T | 26  | 5   | -- | --  |
|            | Ca(ICCV2/PI489777)SNP_01464 | 960  | G | A | 26  | 4   | -- | --  |
|            | Ca(ICCV2/PI489777)SNP_01465 | 1415 | G | A | 16  | 3   | -- | --  |
|            | Ca(ICCV2/PI489777)SNP_01466 | 1808 | C | T | 17  | 10  | -- | --  |
| CakTC38130 | Ca(ICCV2/PI489777)SNP_01467 | 1024 | C | G | 5   | 3   | -- | --  |
| CakTC42896 | Ca(ICCV2/PI489777)SNP_01468 | 214  | C | T | 3   | 3   | -- | --  |
|            | Ca(ICCV2/PI489777)SNP_01469 | 400  | A | C | 8   | 6   | -- | --  |
|            | Ca(ICCV2/PI489777)SNP_01470 | 827  | C | T | 7   | 6   | -- | --  |
|            | Ca(ICCV2/PI489777)SNP_01471 | 845  | G | A | 6   | 6   | -- | --  |
|            | Ca(ICCV2/PI489777)SNP_01472 | 861  | A | G | 6   | 5   | -- | --  |
| CakTC33527 | Ca(ICCV2/PI489777)SNP_01473 | 118  | T | C | 3   | 5   | -- | --  |
|            | Ca(ICCV2/PI489777)SNP_01474 | 167  | G | A | 3   | 5   | -- | --  |
|            | Ca(ICCV2/PI489777)SNP_01475 | 1228 | A | G | 5   | 3   | -- | --  |

|            |                            |      |   |   |    |    |           |     |
|------------|----------------------------|------|---|---|----|----|-----------|-----|
|            | Ca(ICC2/PI489777)SNP_01476 | 1695 | A | G | 4  | 6  | --        | --  |
|            | Ca(ICC2/PI489777)SNP_01477 | 1719 | G | A | 4  | 6  | --        | --  |
|            | Ca(ICC2/PI489777)SNP_01478 | 1905 | A | G | 3  | 4  | --        | --  |
| CakTC38084 | Ca(ICC2/PI489777)SNP_01479 | 260  | T | C | 24 | 65 | Young_pod | --  |
|            | Ca(ICC2/PI489777)SNP_01480 | 290  | C | T | 60 | 66 | Young_pod | --  |
|            | Ca(ICC2/PI489777)SNP_01481 | 408  | A | G | 64 | 70 | Young_pod | --  |
|            | Ca(ICC2/PI489777)SNP_01482 | 587  | A | G | 49 | 34 | Young_pod | --  |
|            | Ca(ICC2/PI489777)SNP_01483 | 590  | C | A | 44 | 33 | Young_pod | --  |
|            | Ca(ICC2/PI489777)SNP_01484 | 662  | A | G | 64 | 27 | Young_pod | --  |
|            | Ca(ICC2/PI489777)SNP_01485 | 689  | A | G | 70 | 23 | Young_pod | --  |
|            | Ca(ICC2/PI489777)SNP_01486 | 725  | T | C | 70 | 21 | Young_pod | --  |
|            | Ca(ICC2/PI489777)SNP_01487 | 1014 | T | G | 35 | 20 | Young_pod | --  |
| CakTC28268 | Ca(ICC2/PI489777)SNP_01488 | 1484 | G | C | 15 | 12 | --        | --  |
|            | Ca(ICC2/PI489777)SNP_01489 | 1638 | G | C | 14 | 4  | --        | --  |
| CakTC41446 | Ca(ICC2/PI489777)SNP_01490 | 145  | A | G | 4  | 4  | --        | --  |
|            | Ca(ICC2/PI489777)SNP_01491 | 214  | G | A | 14 | 9  | --        | --  |
|            | Ca(ICC2/PI489777)SNP_01492 | 274  | C | T | 12 | 16 | --        | --  |
|            | Ca(ICC2/PI489777)SNP_01493 | 609  | A | T | 12 | 14 | --        | --  |
|            | Ca(ICC2/PI489777)SNP_01494 | 638  | T | G | 10 | 13 | --        | --  |
| CakTC26737 | Ca(ICC2/PI489777)SNP_01495 | 679  | A | G | 7  | 7  | --        | --  |
|            | Ca(ICC2/PI489777)SNP_01496 | 1072 | A | C | 9  | 11 | --        | --  |
|            | Ca(ICC2/PI489777)SNP_01497 | 1223 | T | A | 9  | 4  | --        | --  |
| CakTC37859 | Ca(ICC2/PI489777)SNP_01498 | 954  | A | G | 12 | 4  | --        | --  |
|            | Ca(ICC2/PI489777)SNP_01499 | 1065 | A | G | 17 | 4  | --        | --  |
| CakTC40303 | Ca(ICC2/PI489777)SNP_01500 | 262  | C | T | 15 | 11 | --        | LIM |
|            | Ca(ICC2/PI489777)SNP_01501 | 335  | A | G | 13 | 11 | --        | LIM |
|            | Ca(ICC2/PI489777)SNP_01502 | 780  | T | C | 21 | 6  | --        | LIM |
|            | Ca(ICC2/PI489777)SNP_01503 | 864  | C | T | 22 | 3  | --        | LIM |
|            | Ca(ICC2/PI489777)SNP_01504 | 1536 | A | G | 23 | 6  | --        | LIM |
| CakTC33242 | Ca(ICC2/PI489777)SNP_01505 | 317  | T | C | 8  | 4  | --        | --  |
| CakTC34750 | Ca(ICC2/PI489777)SNP_01506 | 1037 | T | G | 11 | 11 | --        | --  |
|            | Ca(ICC2/PI489777)SNP_01507 | 2457 | T | C | 40 | 12 | --        | --  |
|            | Ca(ICC2/PI489777)SNP_01508 | 2933 | T | C | 23 | 14 | --        | --  |
| CakTC29592 | Ca(ICC2/PI489777)SNP_01509 | 1755 | G | A | 5  | 4  | Shoot     | --  |
|            | Ca(ICC2/PI489777)SNP_01510 | 1964 | A | G | 4  | 3  | Shoot     | --  |
| CakTC08960 | Ca(ICC2/PI489777)SNP_01511 | 313  | T | A | 3  | 5  | --        | --  |
| CakTC30747 | Ca(ICC2/PI489777)SNP_01512 | 462  | T | C | 6  | 6  | --        | --  |
|            | Ca(ICC2/PI489777)SNP_01513 | 501  | C | G | 5  | 6  | --        | --  |
|            | Ca(ICC2/PI489777)SNP_01514 | 1234 | C | T | 13 | 14 | --        | --  |
|            | Ca(ICC2/PI489777)SNP_01515 | 1333 | A | C | 14 | 13 | --        | --  |
|            | Ca(ICC2/PI489777)SNP_01516 | 1398 | T | G | 18 | 11 | --        | --  |
|            | Ca(ICC2/PI489777)SNP_01517 | 1686 | G | A | 14 | 12 | --        | --  |
|            | Ca(ICC2/PI489777)SNP_01518 | 1800 | A | G | 9  | 15 | --        | --  |
| CakTC07472 | Ca(ICC2/PI489777)SNP_01519 | 285  | T | C | 3  | 14 | Flower    | bud |
|            | Ca(ICC2/PI489777)SNP_01520 | 294  | T | C | 3  | 14 | Flower    | bud |
|            | Ca(ICC2/PI489777)SNP_01521 | 454  | T | A | 3  | 11 | Flower    | bud |
|            | Ca(ICC2/PI489777)SNP_01522 | 489  | T | C | 3  | 11 | Flower    | bud |
|            | Ca(ICC2/PI489777)SNP_01523 | 513  | C | A | 3  | 8  | Flower    | bud |
|            | Ca(ICC2/PI489777)SNP_01524 | 540  | C | A | 3  | 9  | Flower    | bud |
| CakTC25288 | Ca(ICC2/PI489777)SNP_01525 | 205  | A | C | 5  | 4  | --        | --  |
| CakTC27348 | Ca(ICC2/PI489777)SNP_01526 | 319  | C | T | 3  | 4  | Flower    | bud |
|            | Ca(ICC2/PI489777)SNP_01527 | 754  | T | C | 8  | 3  | Flower    | bud |
| CakTC41729 | Ca(ICC2/PI489777)SNP_01528 | 1611 | G | T | 24 | 20 | --        | --  |
| CakTC41252 | Ca(ICC2/PI489777)SNP_01529 | 79   | T | G | 5  | 4  | --        | --  |
| CakTC37820 | Ca(ICC2/PI489777)SNP_01530 | 677  | T | C | 4  | 21 | --        | --  |
|            | Ca(ICC2/PI489777)SNP_01531 | 740  | A | T | 8  | 17 | --        | --  |
| CakTC28905 | Ca(ICC2/PI489777)SNP_01532 | 486  | C | G | 6  | 12 | --        | --  |
|            | Ca(ICC2/PI489777)SNP_01533 | 1174 | T | C | 16 | 21 | --        | --  |
|            | Ca(ICC2/PI489777)SNP_01534 | 1607 | T | C | 24 | 18 | --        | --  |
|            | Ca(ICC2/PI489777)SNP_01535 | 2009 | C | T | 18 | 16 | --        | --  |
|            | Ca(ICC2/PI489777)SNP_01536 | 2405 | C | T | 15 | 32 | --        | --  |
|            | Ca(ICC2/PI489777)SNP_01537 | 2590 | A | G | 16 | 40 | --        | --  |
|            | Ca(ICC2/PI489777)SNP_01538 | 2717 | T | A | 15 | 37 | --        | --  |
|            | Ca(ICC2/PI489777)SNP_01539 | 2917 | G | T | 10 | 14 | --        | --  |
|            | Ca(ICC2/PI489777)SNP_01540 | 2977 | T | C | 7  | 7  | --        | --  |
| CakTC43078 | Ca(ICC2/PI489777)SNP_01541 | 666  | G | T | 6  | 5  | --        | --  |
|            | Ca(ICC2/PI489777)SNP_01542 | 746  | C | T | 8  | 5  | --        | --  |
|            | Ca(ICC2/PI489777)SNP_01543 | 791  | A | G | 13 | 9  | --        | --  |
|            | Ca(ICC2/PI489777)SNP_01544 | 1028 | G | A | 9  | 11 | --        | --  |
|            | Ca(ICC2/PI489777)SNP_01545 | 1360 | A | T | 3  | 8  | --        | --  |
|            | Ca(ICC2/PI489777)SNP_01546 | 1439 | G | A | 6  | 9  | --        | --  |
| CakTC32145 | Ca(ICC2/PI489777)SNP_01547 | 105  | G | A | 4  | 10 | --        | --  |
|            | Ca(ICC2/PI489777)SNP_01548 | 167  | C | G | 5  | 9  | --        | --  |
|            | Ca(ICC2/PI489777)SNP_01549 | 242  | T | C | 9  | 13 | --        | --  |

|            |                            |      |   |   |    |    |    |      |
|------------|----------------------------|------|---|---|----|----|----|------|
|            | Ca(ICC2/PI489777)SNP_01550 | 1088 | T | C | 24 | 11 | -- | --   |
|            | Ca(ICC2/PI489777)SNP_01551 | 1335 | A | G | 14 | 30 | -- | --   |
|            | Ca(ICC2/PI489777)SNP_01552 | 1979 | T | C | 18 | 17 | -- | --   |
|            | Ca(ICC2/PI489777)SNP_01553 | 2902 | T | C | 27 | 11 | -- | --   |
|            | Ca(ICC2/PI489777)SNP_01554 | 4830 | A | G | 15 | 10 | -- | --   |
| CakTC39419 | Ca(ICC2/PI489777)SNP_01555 | 602  | A | G | 18 | 8  | -- | --   |
|            | Ca(ICC2/PI489777)SNP_01556 | 821  | C | T | 14 | 13 | -- | --   |
|            | Ca(ICC2/PI489777)SNP_01557 | 1317 | T | A | 22 | 11 | -- | --   |
| CakTC33045 | Ca(ICC2/PI489777)SNP_01558 | 103  | G | T | 10 | 3  | -- | --   |
| CakTC23394 | Ca(ICC2/PI489777)SNP_01559 | 747  | C | A | 7  | 15 | -- | --   |
|            | Ca(ICC2/PI489777)SNP_01560 | 1633 | G | T | 13 | 14 | -- | --   |
|            | Ca(ICC2/PI489777)SNP_01561 | 1767 | C | A | 8  | 13 | -- | --   |
| CakTC40048 | Ca(ICC2/PI489777)SNP_01562 | 422  | T | C | 7  | 8  | -- | --   |
|            | Ca(ICC2/PI489777)SNP_01563 | 440  | G | A | 10 | 8  | -- | --   |
|            | Ca(ICC2/PI489777)SNP_01564 | 591  | C | T | 9  | 4  | -- | --   |
|            | Ca(ICC2/PI489777)SNP_01565 | 881  | A | G | 14 | 8  | -- | --   |
|            | Ca(ICC2/PI489777)SNP_01566 | 974  | T | A | 9  | 7  | -- | --   |
|            | Ca(ICC2/PI489777)SNP_01567 | 1476 | A | G | 3  | 3  | -- | --   |
| CakTC26516 | Ca(ICC2/PI489777)SNP_01568 | 1772 | C | T | 10 | 9  | -- | --   |
|            | Ca(ICC2/PI489777)SNP_01569 | 1832 | C | T | 13 | 12 | -- | --   |
|            | Ca(ICC2/PI489777)SNP_01570 | 1835 | A | G | 12 | 12 | -- | --   |
|            | Ca(ICC2/PI489777)SNP_01571 | 1896 | G | A | 8  | 10 | -- | --   |
|            | Ca(ICC2/PI489777)SNP_01572 | 1898 | C | A | 10 | 11 | -- | --   |
|            | Ca(ICC2/PI489777)SNP_01573 | 2061 | G | A | 6  | 7  | -- | --   |
| CakTC41167 | Ca(ICC2/PI489777)SNP_01574 | 541  | C | T | 18 | 7  | -- | --   |
| CakTC12700 | Ca(ICC2/PI489777)SNP_01575 | 1269 | A | C | 31 | 23 | -- | --   |
|            | Ca(ICC2/PI489777)SNP_01576 | 1326 | A | G | 29 | 42 | -- | --   |
|            | Ca(ICC2/PI489777)SNP_01577 | 1432 | C | T | 30 | 35 | -- | --   |
|            | Ca(ICC2/PI489777)SNP_01578 | 1496 | T | C | 19 | 21 | -- | --   |
|            | Ca(ICC2/PI489777)SNP_01579 | 1553 | C | T | 17 | 18 | -- | --   |
| CakTC25137 | Ca(ICC2/PI489777)SNP_01580 | 605  | T | C | 3  | 4  | -- | --   |
| CakTC43197 | Ca(ICC2/PI489777)SNP_01581 | 174  | T | C | 19 | 10 | -- | --   |
|            | Ca(ICC2/PI489777)SNP_01582 | 425  | C | T | 22 | 33 | -- | --   |
|            | Ca(ICC2/PI489777)SNP_01583 | 741  | G | T | 5  | 6  | -- | --   |
|            | Ca(ICC2/PI489777)SNP_01584 | 826  | G | A | 4  | 3  | -- | --   |
| CakTC38660 | Ca(ICC2/PI489777)SNP_01585 | 351  | C | T | 4  | 4  | -- | --   |
|            | Ca(ICC2/PI489777)SNP_01586 | 840  | G | A | 5  | 4  | -- | --   |
| CakTC39104 | Ca(ICC2/PI489777)SNP_01587 | 461  | A | G | 19 | 11 | -- | --   |
|            | Ca(ICC2/PI489777)SNP_01588 | 560  | C | G | 17 | 10 | -- | --   |
|            | Ca(ICC2/PI489777)SNP_01589 | 875  | T | C | 14 | 11 | -- | --   |
|            | Ca(ICC2/PI489777)SNP_01590 | 1031 | T | C | 13 | 15 | -- | --   |
|            | Ca(ICC2/PI489777)SNP_01591 | 1037 | T | G | 13 | 15 | -- | --   |
|            | Ca(ICC2/PI489777)SNP_01592 | 1061 | C | T | 14 | 12 | -- | --   |
| CakTC38992 | Ca(ICC2/PI489777)SNP_01593 | 37   | C | T | 22 | 21 | -- | --   |
|            | Ca(ICC2/PI489777)SNP_01594 | 51   | G | A | 23 | 22 | -- | --   |
|            | Ca(ICC2/PI489777)SNP_01595 | 83   | T | C | 33 | 25 | -- | --   |
|            | Ca(ICC2/PI489777)SNP_01596 | 256  | T | C | 52 | 41 | -- | --   |
| CakTC32682 | Ca(ICC2/PI489777)SNP_01597 | 376  | T | A | 41 | 4  | -- | TRAF |
|            | Ca(ICC2/PI489777)SNP_01598 | 407  | A | G | 41 | 7  | -- | TRAF |
|            | Ca(ICC2/PI489777)SNP_01599 | 544  | A | G | 8  | 7  | -- | TRAF |
|            | Ca(ICC2/PI489777)SNP_01600 | 688  | C | T | 7  | 5  | -- | TRAF |
|            | Ca(ICC2/PI489777)SNP_01601 | 1303 | G | A | 3  | 8  | -- | TRAF |
|            | Ca(ICC2/PI489777)SNP_01602 | 1318 | G | A | 3  | 7  | -- | TRAF |
|            | Ca(ICC2/PI489777)SNP_01603 | 1909 | A | G | 8  | 8  | -- | TRAF |
|            | Ca(ICC2/PI489777)SNP_01604 | 1930 | C | T | 8  | 7  | -- | TRAF |
|            | Ca(ICC2/PI489777)SNP_01605 | 2062 | A | G | 8  | 5  | -- | TRAF |
| CakTC32060 | Ca(ICC2/PI489777)SNP_01606 | 625  | A | C | 4  | 3  | -- | --   |
|            | Ca(ICC2/PI489777)SNP_01607 | 646  | A | G | 5  | 3  | -- | --   |
|            | Ca(ICC2/PI489777)SNP_01608 | 822  | C | T | 9  | 8  | -- | --   |
|            | Ca(ICC2/PI489777)SNP_01609 | 916  | C | G | 13 | 11 | -- | --   |
|            | Ca(ICC2/PI489777)SNP_01610 | 1053 | G | A | 11 | 8  | -- | --   |
|            | Ca(ICC2/PI489777)SNP_01611 | 1130 | A | G | 12 | 6  | -- | --   |
|            | Ca(ICC2/PI489777)SNP_01612 | 1320 | C | A | 8  | 3  | -- | --   |
| CakTC42048 | Ca(ICC2/PI489777)SNP_01613 | 486  | C | A | 12 | 8  | -- | --   |
| CakTC40220 | Ca(ICC2/PI489777)SNP_01614 | 413  | G | A | 10 | 6  | -- | --   |
|            | Ca(ICC2/PI489777)SNP_01615 | 419  | C | T | 13 | 6  | -- | --   |
|            | Ca(ICC2/PI489777)SNP_01616 | 428  | C | G | 14 | 7  | -- | --   |
|            | Ca(ICC2/PI489777)SNP_01617 | 460  | G | C | 12 | 10 | -- | --   |
|            | Ca(ICC2/PI489777)SNP_01618 | 484  | G | C | 15 | 10 | -- | --   |
|            | Ca(ICC2/PI489777)SNP_01619 | 530  | T | C | 16 | 10 | -- | --   |
|            | Ca(ICC2/PI489777)SNP_01620 | 674  | T | C | 15 | 10 | -- | --   |
|            | Ca(ICC2/PI489777)SNP_01621 | 1322 | A | G | 15 | 9  | -- | --   |
| CakTC11594 | Ca(ICC2/PI489777)SNP_01622 | 758  | T | C | 7  | 7  | -- | --   |
|            | Ca(ICC2/PI489777)SNP_01623 | 799  | G | A | 5  | 6  | -- | --   |

|            |                            |      |   |   |    |    |    |     |
|------------|----------------------------|------|---|---|----|----|----|-----|
| CakTC40147 | Ca(ICC2/PI489777)SNP_01624 | 973  | A | G | 5  | 3  | -- | --  |
|            | Ca(ICC2/PI489777)SNP_01625 | 1126 | C | G | 5  | 4  | -- | --  |
|            | Ca(ICC2/PI489777)SNP_01626 | 1147 | C | A | 4  | 4  | -- | --  |
|            | Ca(ICC2/PI489777)SNP_01627 | 1156 | G | T | 3  | 4  | -- | --  |
| CakTC37063 | Ca(ICC2/PI489777)SNP_01628 | 403  | C | T | 8  | 7  | -- | --  |
|            | Ca(ICC2/PI489777)SNP_01629 | 523  | A | T | 8  | 6  | -- | --  |
| CakTC42853 | Ca(ICC2/PI489777)SNP_01630 | 1893 | G | A | 8  | 3  | -- | --  |
| CakTC23286 | Ca(ICC2/PI489777)SNP_01631 | 137  | C | A | 4  | 5  | -- | --  |
|            | Ca(ICC2/PI489777)SNP_01632 | 162  | C | T | 4  | 6  | -- | --  |
|            | Ca(ICC2/PI489777)SNP_01633 | 345  | A | G | 12 | 12 | -- | --  |
|            | Ca(ICC2/PI489777)SNP_01634 | 990  | T | C | 6  | 9  | -- | --  |
|            | Ca(ICC2/PI489777)SNP_01635 | 2220 | T | G | 5  | 7  | -- | --  |
|            | Ca(ICC2/PI489777)SNP_01636 | 2268 | A | G | 5  | 9  | -- | --  |
| CakTC33522 | Ca(ICC2/PI489777)SNP_01637 | 115  | T | C | 27 | 7  | -- | --  |
|            | Ca(ICC2/PI489777)SNP_01638 | 157  | C | T | 44 | 3  | -- | --  |
| CakTC25725 | Ca(ICC2/PI489777)SNP_01639 | 611  | A | G | 34 | 26 | -- | --  |
|            | Ca(ICC2/PI489777)SNP_01640 | 1019 | T | G | 19 | 16 | -- | --  |
| CakTC27515 | Ca(ICC2/PI489777)SNP_01641 | 262  | T | G | 9  | 7  | -- | --  |
| CakTC29919 | Ca(ICC2/PI489777)SNP_01642 | 1445 | G | A | 8  | 3  | -- | --  |
|            | Ca(ICC2/PI489777)SNP_01643 | 2065 | C | T | 7  | 3  | -- | --  |
| CakTC42273 | Ca(ICC2/PI489777)SNP_01644 | 1604 | C | A | 3  | 4  | -- | --  |
|            | Ca(ICC2/PI489777)SNP_01645 | 1726 | T | C | 3  | 5  | -- | --  |
|            | Ca(ICC2/PI489777)SNP_01646 | 1804 | T | C | 5  | 10 | -- | --  |
|            | Ca(ICC2/PI489777)SNP_01647 | 1855 | T | C | 3  | 15 | -- | --  |
|            | Ca(ICC2/PI489777)SNP_01648 | 1876 | C | T | 6  | 8  | -- | --  |
|            | Ca(ICC2/PI489777)SNP_01649 | 2170 | T | C | 4  | 20 | -- | --  |
|            | Ca(ICC2/PI489777)SNP_01650 | 2582 | C | T | 3  | 3  | -- | --  |
| CakTC38296 | Ca(ICC2/PI489777)SNP_01651 | 992  | T | C | 18 | 8  | -- | --  |
| CakTC40483 | Ca(ICC2/PI489777)SNP_01652 | 370  | G | C | 6  | 12 | -- | --  |
|            | Ca(ICC2/PI489777)SNP_01653 | 744  | T | C | 5  | 4  | -- | --  |
| CakTC37616 | Ca(ICC2/PI489777)SNP_01654 | 439  | C | T | 17 | 5  | -- | HSF |
|            | Ca(ICC2/PI489777)SNP_01655 | 485  | A | C | 20 | 4  | -- | HSF |
| CakTC25429 | Ca(ICC2/PI489777)SNP_01656 | 524  | A | G | 13 | 9  | -- | --  |
|            | Ca(ICC2/PI489777)SNP_01657 | 1205 | T | C | 10 | 10 | -- | --  |
| CakTC38326 | Ca(ICC2/PI489777)SNP_01658 | 725  | A | G | 5  | 10 | -- | --  |
|            | Ca(ICC2/PI489777)SNP_01659 | 1149 | C | T | 5  | 4  | -- | --  |
|            | Ca(ICC2/PI489777)SNP_01660 | 1379 | A | G | 6  | 3  | -- | --  |
| CakTC34736 | Ca(ICC2/PI489777)SNP_01661 | 922  | C | T | 25 | 7  | -- | ARF |
|            | Ca(ICC2/PI489777)SNP_01662 | 1483 | G | T | 20 | 19 | -- | ARF |
|            | Ca(ICC2/PI489777)SNP_01663 | 2104 | A | G | 45 | 17 | -- | ARF |
|            | Ca(ICC2/PI489777)SNP_01664 | 2842 | C | T | 36 | 6  | -- | ARF |
|            | Ca(ICC2/PI489777)SNP_01665 | 3447 | A | G | 25 | 8  | -- | ARF |
|            | Ca(ICC2/PI489777)SNP_01666 | 3476 | C | T | 25 | 7  | -- | ARF |
| CakTC40878 | Ca(ICC2/PI489777)SNP_01667 | 2896 | A | C | 3  | 4  | -- | --  |
| CakTC31527 | Ca(ICC2/PI489777)SNP_01668 | 1473 | T | G | 3  | 5  | -- | --  |
| CakTC23979 | Ca(ICC2/PI489777)SNP_01669 | 27   | G | A | 8  | 4  | -- | --  |
|            | Ca(ICC2/PI489777)SNP_01670 | 52   | A | C | 11 | 7  | -- | --  |
|            | Ca(ICC2/PI489777)SNP_01671 | 185  | A | C | 33 | 14 | -- | --  |
|            | Ca(ICC2/PI489777)SNP_01672 | 361  | C | T | 39 | 15 | -- | --  |
|            | Ca(ICC2/PI489777)SNP_01673 | 2210 | A | G | 25 | 11 | -- | --  |
|            | Ca(ICC2/PI489777)SNP_01674 | 3297 | A | G | 11 | 8  | -- | --  |
| CakTC42348 | Ca(ICC2/PI489777)SNP_01675 | 449  | G | A | 69 | 43 | -- | --  |
|            | Ca(ICC2/PI489777)SNP_01676 | 623  | T | C | 85 | 41 | -- | --  |
|            | Ca(ICC2/PI489777)SNP_01677 | 688  | T | C | 72 | 42 | -- | --  |
| CakTC39972 | Ca(ICC2/PI489777)SNP_01678 | 17   | G | T | 37 | 14 | -- | --  |
| CakTC37672 | Ca(ICC2/PI489777)SNP_01679 | 90   | C | T | 4  | 9  | -- | --  |
|            | Ca(ICC2/PI489777)SNP_01680 | 553  | C | T | 7  | 10 | -- | --  |
|            | Ca(ICC2/PI489777)SNP_01681 | 622  | T | C | 8  | 12 | -- | --  |
| CakTC26234 | Ca(ICC2/PI489777)SNP_01682 | 383  | A | G | 11 | 11 | -- | --  |
|            | Ca(ICC2/PI489777)SNP_01683 | 551  | T | C | 7  | 9  | -- | --  |
|            | Ca(ICC2/PI489777)SNP_01684 | 711  | C | T | 6  | 7  | -- | --  |
|            | Ca(ICC2/PI489777)SNP_01685 | 1439 | C | T | 4  | 4  | -- | --  |
|            | Ca(ICC2/PI489777)SNP_01686 | 3064 | T | C | 27 | 6  | -- | --  |
|            | Ca(ICC2/PI489777)SNP_01687 | 3243 | C | T | 57 | 25 | -- | --  |
|            | Ca(ICC2/PI489777)SNP_01688 | 3303 | A | G | 54 | 25 | -- | --  |
|            | Ca(ICC2/PI489777)SNP_01689 | 3407 | A | C | 40 | 24 | -- | --  |
| CakTC33059 | Ca(ICC2/PI489777)SNP_01690 | 213  | A | C | 5  | 7  | -- | --  |
| CakTC28549 | Ca(ICC2/PI489777)SNP_01691 | 528  | T | G | 7  | 5  | -- | --  |
|            | Ca(ICC2/PI489777)SNP_01692 | 597  | C | G | 8  | 4  | -- | --  |
|            | Ca(ICC2/PI489777)SNP_01693 | 703  | T | C | 9  | 4  | -- | --  |
|            | Ca(ICC2/PI489777)SNP_01694 | 711  | C | T | 9  | 5  | -- | --  |
|            | Ca(ICC2/PI489777)SNP_01695 | 843  | A | G | 4  | 3  | -- | --  |
| CakTC33054 | Ca(ICC2/PI489777)SNP_01696 | 324  | T | C | 4  | 6  | -- | --  |
|            | Ca(ICC2/PI489777)SNP_01697 | 474  | T | C | 3  | 7  | -- | --  |

|            |                            |      |   |   |     |     |        |     |
|------------|----------------------------|------|---|---|-----|-----|--------|-----|
| CakTC28083 | Ca(ICC2/P1489777)SNP_01698 | 197  | A | G | 7   | 3   | Flower | bud |
|            | Ca(ICC2/P1489777)SNP_01699 | 334  | T | C | 7   | 3   | Flower | bud |
| CakTC27898 | Ca(ICC2/P1489777)SNP_01700 | 1147 | T | C | 4   | 5   | Shoot  | --  |
| CakTC32855 | Ca(ICC2/P1489777)SNP_01701 | 1169 | T | C | 14  | 6   | --     | --  |
|            | Ca(ICC2/P1489777)SNP_01702 | 1643 | T | C | 14  | 4   | --     | --  |
|            | Ca(ICC2/P1489777)SNP_01703 | 1689 | A | G | 15  | 3   | --     | --  |
|            | Ca(ICC2/P1489777)SNP_01704 | 1697 | C | T | 15  | 3   | --     | --  |
|            | Ca(ICC2/P1489777)SNP_01705 | 1988 | T | C | 9   | 3   | --     | --  |
|            | Ca(ICC2/P1489777)SNP_01706 | 2167 | G | C | 8   | 5   | --     | --  |
|            | Ca(ICC2/P1489777)SNP_01707 | 2173 | G | T | 8   | 5   | --     | --  |
| CakTC41049 | Ca(ICC2/P1489777)SNP_01708 | 448  | C | T | 45  | 58  | --     | --  |
| CakTC32824 | Ca(ICC2/P1489777)SNP_01709 | 363  | C | A | 8   | 3   | --     | --  |
|            | Ca(ICC2/P1489777)SNP_01710 | 414  | G | A | 9   | 4   | --     | --  |
|            | Ca(ICC2/P1489777)SNP_01711 | 1141 | T | C | 5   | 5   | --     | --  |
|            | Ca(ICC2/P1489777)SNP_01712 | 1465 | A | C | 3   | 4   | --     | --  |
|            | Ca(ICC2/P1489777)SNP_01713 | 2341 | C | T | 6   | 4   | --     | --  |
|            | Ca(ICC2/P1489777)SNP_01714 | 2393 | C | G | 7   | 4   | --     | --  |
|            | Ca(ICC2/P1489777)SNP_01715 | 2440 | T | C | 9   | 4   | --     | --  |
|            | Ca(ICC2/P1489777)SNP_01716 | 2443 | C | T | 9   | 4   | --     | --  |
|            | Ca(ICC2/P1489777)SNP_01717 | 2525 | G | A | 10  | 4   | --     | --  |
|            | Ca(ICC2/P1489777)SNP_01718 | 2573 | C | G | 9   | 4   | --     | --  |
| CakTC39917 | Ca(ICC2/P1489777)SNP_01719 | 555  | C | G | 9   | 6   | --     | --  |
|            | Ca(ICC2/P1489777)SNP_01720 | 1284 | G | A | 12  | 10  | --     | --  |
|            | Ca(ICC2/P1489777)SNP_01721 | 1346 | A | C | 10  | 5   | --     | --  |
| CakTC22886 | Ca(ICC2/P1489777)SNP_01722 | 651  | A | G | 662 | 120 | --     | --  |
|            | Ca(ICC2/P1489777)SNP_01723 | 672  | A | G | 629 | 120 | --     | --  |
|            | Ca(ICC2/P1489777)SNP_01724 | 894  | G | A | 325 | 67  | --     | --  |
|            | Ca(ICC2/P1489777)SNP_01725 | 1656 | A | G | 242 | 35  | --     | --  |
| CakTC27122 | Ca(ICC2/P1489777)SNP_01726 | 375  | T | C | 17  | 7   | --     | --  |
| CakTC23508 | Ca(ICC2/P1489777)SNP_01727 | 276  | A | C | 7   | 3   | --     | --  |
|            | Ca(ICC2/P1489777)SNP_01728 | 288  | G | T | 7   | 3   | --     | --  |
| CakTC28844 | Ca(ICC2/P1489777)SNP_01729 | 772  | G | A | 20  | 4   | --     | --  |
|            | Ca(ICC2/P1489777)SNP_01730 | 1240 | C | T | 16  | 9   | --     | --  |
| CakTC40755 | Ca(ICC2/P1489777)SNP_01731 | 1231 | T | C | 10  | 3   | --     | --  |
|            | Ca(ICC2/P1489777)SNP_01732 | 1461 | T | C | 13  | 4   | --     | --  |
|            | Ca(ICC2/P1489777)SNP_01733 | 1638 | C | T | 13  | 6   | --     | --  |
|            | Ca(ICC2/P1489777)SNP_01734 | 1644 | A | C | 14  | 6   | --     | --  |
|            | Ca(ICC2/P1489777)SNP_01735 | 1734 | A | G | 13  | 4   | --     | --  |
|            | Ca(ICC2/P1489777)SNP_01736 | 1740 | C | T | 13  | 5   | --     | --  |
| CakTC38811 | Ca(ICC2/P1489777)SNP_01737 | 881  | T | C | 10  | 3   | --     | --  |
|            | Ca(ICC2/P1489777)SNP_01738 | 976  | A | G | 12  | 4   | --     | --  |
|            | Ca(ICC2/P1489777)SNP_01739 | 1220 | A | G | 10  | 7   | --     | --  |
|            | Ca(ICC2/P1489777)SNP_01740 | 1298 | A | G | 11  | 7   | --     | --  |
| CakTC40530 | Ca(ICC2/P1489777)SNP_01741 | 1337 | A | G | 13  | 8   | --     | --  |
|            | Ca(ICC2/P1489777)SNP_01742 | 1397 | A | G | 14  | 10  | --     | --  |
|            | Ca(ICC2/P1489777)SNP_01743 | 1559 | A | T | 15  | 7   | --     | --  |
|            | Ca(ICC2/P1489777)SNP_01744 | 2164 | G | C | 11  | 7   | --     | --  |
|            | Ca(ICC2/P1489777)SNP_01745 | 2221 | T | A | 10  | 7   | --     | --  |
|            | Ca(ICC2/P1489777)SNP_01746 | 2234 | A | G | 10  | 6   | --     | --  |
|            | Ca(ICC2/P1489777)SNP_01747 | 2335 | T | C | 9   | 3   | --     | --  |
|            | Ca(ICC2/P1489777)SNP_01748 | 2350 | T | C | 8   | 4   | --     | --  |
|            | Ca(ICC2/P1489777)SNP_01749 | 2363 | A | G | 8   | 3   | --     | --  |
|            | Ca(ICC2/P1489777)SNP_01750 | 2372 | G | A | 7   | 4   | --     | --  |
| CakTC35403 | Ca(ICC2/P1489777)SNP_01751 | 2614 | T | C | 12  | 10  | --     | --  |
|            | Ca(ICC2/P1489777)SNP_01752 | 3367 | G | A | 3   | 6   | --     | --  |
| CakTC38988 | Ca(ICC2/P1489777)SNP_01753 | 185  | C | G | 6   | 7   | --     | --  |
|            | Ca(ICC2/P1489777)SNP_01754 | 262  | A | G | 8   | 7   | --     | --  |
|            | Ca(ICC2/P1489777)SNP_01755 | 1253 | C | A | 19  | 25  | --     | --  |
| CakTC25420 | Ca(ICC2/P1489777)SNP_01756 | 228  | G | A | 38  | 8   | --     | --  |
|            | Ca(ICC2/P1489777)SNP_01757 | 270  | C | T | 36  | 8   | --     | --  |
|            | Ca(ICC2/P1489777)SNP_01758 | 839  | T | C | 29  | 7   | --     | --  |
|            | Ca(ICC2/P1489777)SNP_01759 | 887  | C | T | 27  | 6   | --     | --  |
|            | Ca(ICC2/P1489777)SNP_01760 | 1026 | C | T | 37  | 8   | --     | --  |
|            | Ca(ICC2/P1489777)SNP_01761 | 1037 | T | C | 35  | 10  | --     | --  |
|            | Ca(ICC2/P1489777)SNP_01762 | 1232 | G | A | 47  | 10  | --     | --  |
|            | Ca(ICC2/P1489777)SNP_01763 | 2052 | G | T | 35  | 10  | --     | --  |
|            | Ca(ICC2/P1489777)SNP_01764 | 2347 | G | A | 3   | 3   | --     | --  |
| CakTC27791 | Ca(ICC2/P1489777)SNP_01765 | 149  | G | A | 48  | 31  | --     | --  |
|            | Ca(ICC2/P1489777)SNP_01766 | 154  | T | C | 58  | 31  | --     | --  |
|            | Ca(ICC2/P1489777)SNP_01767 | 170  | A | G | 38  | 32  | --     | --  |
|            | Ca(ICC2/P1489777)SNP_01768 | 477  | A | G | 45  | 29  | --     | --  |
| CakTC41352 | Ca(ICC2/P1489777)SNP_01769 | 762  | G | C | 6   | 3   | --     | --  |
|            | Ca(ICC2/P1489777)SNP_01770 | 763  | G | A | 6   | 3   | --     | --  |
|            | Ca(ICC2/P1489777)SNP_01771 | 928  | G | A | 5   | 4   | --     | --  |



|            |                            |      |   |   |     |    |           |     |
|------------|----------------------------|------|---|---|-----|----|-----------|-----|
|            | Ca(ICC2/PI489777)SNP_01772 | 938  | G | C | 5   | 3  | --        | --  |
|            | Ca(ICC2/PI489777)SNP_01773 | 1566 | A | C | 3   | 3  | --        | --  |
| CakTC38298 | Ca(ICC2/PI489777)SNP_01774 | 418  | G | T | 6   | 3  | --        | --  |
| CakTC24681 | Ca(ICC2/PI489777)SNP_01775 | 1842 | C | G | 4   | 4  | --        | --  |
|            | Ca(ICC2/PI489777)SNP_01776 | 1892 | A | G | 4   | 4  | --        | --  |
| CakTC28209 | Ca(ICC2/PI489777)SNP_01777 | 390  | T | C | 7   | 7  | --        | --  |
|            | Ca(ICC2/PI489777)SNP_01778 | 453  | A | G | 7   | 6  | --        | --  |
|            | Ca(ICC2/PI489777)SNP_01779 | 1467 | A | T | 19  | 9  | --        | --  |
| CakTC43222 | Ca(ICC2/PI489777)SNP_01780 | 41   | A | T | 5   | 3  | Young_pod | --  |
|            | Ca(ICC2/PI489777)SNP_01781 | 81   | G | C | 7   | 4  | Young_pod | --  |
|            | Ca(ICC2/PI489777)SNP_01782 | 116  | T | C | 7   | 4  | Young_pod | --  |
|            | Ca(ICC2/PI489777)SNP_01783 | 133  | T | C | 7   | 5  | Young_pod | --  |
|            | Ca(ICC2/PI489777)SNP_01784 | 420  | C | A | 3   | 10 | Young_pod | --  |
|            | Ca(ICC2/PI489777)SNP_01785 | 792  | T | C | 4   | 4  | Young_pod | --  |
| CakTC31774 | Ca(ICC2/PI489777)SNP_01786 | 559  | T | C | 3   | 5  | Root      | --  |
| CakTC25545 | Ca(ICC2/PI489777)SNP_01787 | 1414 | G | A | 116 | 89 | Young_pod | --  |
|            | Ca(ICC2/PI489777)SNP_01788 | 1769 | A | G | 100 | 64 | Young_pod | --  |
| CakTC37274 | Ca(ICC2/PI489777)SNP_01789 | 245  | C | T | 8   | 3  | Flower    | bud |
| CakTC24066 | Ca(ICC2/PI489777)SNP_01790 | 738  | A | G | 8   | 3  | Flower    | bud |
|            | Ca(ICC2/PI489777)SNP_01791 | 1347 | G | A | 29  | 22 | Flower    | bud |
|            | Ca(ICC2/PI489777)SNP_01792 | 1534 | C | T | 28  | 14 | Flower    | bud |
|            | Ca(ICC2/PI489777)SNP_01793 | 1703 | C | T | 26  | 15 | Flower    | bud |
| CakTC29453 | Ca(ICC2/PI489777)SNP_01794 | 313  | A | G | 5   | 3  | --        | --  |
|            | Ca(ICC2/PI489777)SNP_01795 | 925  | G | A | 7   | 7  | --        | --  |
|            | Ca(ICC2/PI489777)SNP_01796 | 1063 | G | A | 6   | 10 | --        | --  |
|            | Ca(ICC2/PI489777)SNP_01797 | 1150 | T | C | 5   | 15 | --        | --  |
|            | Ca(ICC2/PI489777)SNP_01798 | 1255 | A | G | 4   | 14 | --        | --  |
| CakTC37354 | Ca(ICC2/PI489777)SNP_01799 | 32   | C | G | 13  | 6  | --        | --  |
|            | Ca(ICC2/PI489777)SNP_01800 | 242  | G | A | 18  | 10 | --        | --  |
|            | Ca(ICC2/PI489777)SNP_01801 | 434  | T | C | 14  | 8  | --        | --  |
| CakTC23615 | Ca(ICC2/PI489777)SNP_01802 | 478  | G | A | 31  | 5  | --        | --  |
|            | Ca(ICC2/PI489777)SNP_01803 | 605  | A | G | 21  | 8  | --        | --  |
|            | Ca(ICC2/PI489777)SNP_01804 | 1024 | A | G | 20  | 7  | --        | --  |
|            | Ca(ICC2/PI489777)SNP_01805 | 1436 | T | C | 26  | 6  | --        | --  |
|            | Ca(ICC2/PI489777)SNP_01806 | 1678 | T | C | 21  | 7  | --        | --  |
|            | Ca(ICC2/PI489777)SNP_01807 | 2443 | T | A | 17  | 8  | --        | --  |
|            | Ca(ICC2/PI489777)SNP_01808 | 2641 | G | A | 18  | 11 | --        | --  |
|            | Ca(ICC2/PI489777)SNP_01809 | 2707 | C | A | 22  | 10 | --        | --  |
|            | Ca(ICC2/PI489777)SNP_01810 | 3375 | G | A | 21  | 11 | --        | --  |
|            | Ca(ICC2/PI489777)SNP_01811 | 3384 | A | T | 21  | 10 | --        | --  |
|            | Ca(ICC2/PI489777)SNP_01812 | 3619 | C | T | 14  | 7  | --        | --  |
|            | Ca(ICC2/PI489777)SNP_01813 | 3877 | A | G | 16  | 4  | --        | --  |
|            | Ca(ICC2/PI489777)SNP_01814 | 4393 | T | G | 22  | 11 | --        | --  |
|            | Ca(ICC2/PI489777)SNP_01815 | 4549 | A | G | 25  | 8  | --        | --  |
|            | Ca(ICC2/PI489777)SNP_01816 | 4812 | A | T | 16  | 5  | --        | --  |
|            | Ca(ICC2/PI489777)SNP_01817 | 4947 | C | T | 13  | 5  | --        | --  |
|            | Ca(ICC2/PI489777)SNP_01818 | 5022 | T | C | 10  | 4  | --        | --  |
|            | Ca(ICC2/PI489777)SNP_01819 | 5136 | T | G | 7   | 5  | --        | --  |
|            | Ca(ICC2/PI489777)SNP_01820 | 5482 | C | A | 8   | 5  | --        | --  |
|            | Ca(ICC2/PI489777)SNP_01821 | 5896 | C | T | 26  | 26 | --        | --  |
|            | Ca(ICC2/PI489777)SNP_01822 | 6580 | T | A | 9   | 29 | --        | --  |
| CakTC30482 | Ca(ICC2/PI489777)SNP_01823 | 112  | A | G | 5   | 6  | Root      | --  |
|            | Ca(ICC2/PI489777)SNP_01824 | 207  | G | A | 5   | 9  | Root      | --  |
| CakTC38047 | Ca(ICC2/PI489777)SNP_01825 | 1370 | C | T | 5   | 4  | --        | --  |
|            | Ca(ICC2/PI489777)SNP_01826 | 1521 | T | C | 5   | 3  | --        | --  |
|            | Ca(ICC2/PI489777)SNP_01827 | 1542 | T | G | 5   | 3  | --        | --  |
| CakTC09454 | Ca(ICC2/PI489777)SNP_01828 | 1702 | A | T | 3   | 3  | --        | --  |
| CakTC39474 | Ca(ICC2/PI489777)SNP_01829 | 928  | G | T | 20  | 9  | --        | --  |
|            | Ca(ICC2/PI489777)SNP_01830 | 1110 | T | G | 16  | 8  | --        | --  |
|            | Ca(ICC2/PI489777)SNP_01831 | 1123 | T | A | 16  | 5  | --        | --  |
|            | Ca(ICC2/PI489777)SNP_01832 | 1249 | C | A | 4   | 3  | --        | --  |
|            | Ca(ICC2/PI489777)SNP_01833 | 1250 | T | A | 4   | 3  | --        | --  |
| CakTC27526 | Ca(ICC2/PI489777)SNP_01834 | 2521 | A | C | 15  | 3  | Young_pod | PHD |
|            | Ca(ICC2/PI489777)SNP_01835 | 2954 | C | G | 9   | 7  | Young_pod | PHD |
|            | Ca(ICC2/PI489777)SNP_01836 | 2960 | C | T | 9   | 7  | Young_pod | PHD |
|            | Ca(ICC2/PI489777)SNP_01837 | 3280 | T | A | 21  | 7  | Young_pod | PHD |
|            | Ca(ICC2/PI489777)SNP_01838 | 4096 | T | G | 6   | 10 | Young_pod | PHD |
|            | Ca(ICC2/PI489777)SNP_01839 | 4326 | T | C | 4   | 8  | Young_pod | PHD |
| CakTC28598 | Ca(ICC2/PI489777)SNP_01840 | 114  | A | C | 43  | 32 | --        | --  |
|            | Ca(ICC2/PI489777)SNP_01841 | 478  | G | A | 126 | 36 | --        | --  |
|            | Ca(ICC2/PI489777)SNP_01842 | 508  | C | G | 126 | 44 | --        | --  |
|            | Ca(ICC2/PI489777)SNP_01843 | 544  | C | T | 101 | 43 | --        | --  |
|            | Ca(ICC2/PI489777)SNP_01844 | 856  | G | T | 152 | 70 | --        | --  |
|            | Ca(ICC2/PI489777)SNP_01845 | 1096 | A | G | 53  | 27 | --        | --  |

|            |                            |      |   |   |    |    |        |        |
|------------|----------------------------|------|---|---|----|----|--------|--------|
| CakTC43051 | Ca(ICC2/PI489777)SNP_01846 | 86   | T | A | 5  | 5  | --     | --     |
|            | Ca(ICC2/PI489777)SNP_01847 | 107  | T | G | 7  | 4  | --     | --     |
|            | Ca(ICC2/PI489777)SNP_01848 | 657  | G | A | 27 | 23 | --     | --     |
| CakTC38040 | Ca(ICC2/PI489777)SNP_01849 | 334  | T | A | 79 | 59 | --     | --     |
| CakTC23972 | Ca(ICC2/PI489777)SNP_01850 | 679  | C | G | 19 | 22 | --     | --     |
| CakTC26763 | Ca(ICC2/PI489777)SNP_01851 | 192  | C | G | 7  | 8  | --     | RWP-RK |
|            | Ca(ICC2/PI489777)SNP_01852 | 542  | A | T | 5  | 4  | --     | RWP-RK |
|            | Ca(ICC2/PI489777)SNP_01853 | 2842 | G | C | 5  | 4  | --     | RWP-RK |
|            | Ca(ICC2/PI489777)SNP_01854 | 2915 | T | A | 5  | 4  | --     | RWP-RK |
| CakTC42067 | Ca(ICC2/PI489777)SNP_01855 | 574  | G | A | 3  | 9  | --     | --     |
|            | Ca(ICC2/PI489777)SNP_01856 | 591  | T | C | 4  | 10 | --     | --     |
|            | Ca(ICC2/PI489777)SNP_01857 | 761  | A | G | 6  | 11 | --     | --     |
| CakTC42401 | Ca(ICC2/PI489777)SNP_01858 | 598  | C | G | 9  | 10 | --     | --     |
| CakTC43058 | Ca(ICC2/PI489777)SNP_01859 | 440  | G | A | 11 | 7  | --     | --     |
|            | Ca(ICC2/PI489777)SNP_01860 | 662  | G | A | 8  | 10 | --     | --     |
|            | Ca(ICC2/PI489777)SNP_01861 | 671  | T | C | 8  | 10 | --     | --     |
| CakTC22241 | Ca(ICC2/PI489777)SNP_01862 | 384  | A | G | 12 | 23 | --     | --     |
| CakTC26489 | Ca(ICC2/PI489777)SNP_01863 | 498  | C | T | 17 | 3  | --     | --     |
|            | Ca(ICC2/PI489777)SNP_01864 | 1897 | G | A | 45 | 15 | --     | --     |
|            | Ca(ICC2/PI489777)SNP_01865 | 1967 | A | G | 30 | 11 | --     | --     |
|            | Ca(ICC2/PI489777)SNP_01866 | 2034 | C | G | 25 | 4  | --     | --     |
| CakTC32407 | Ca(ICC2/PI489777)SNP_01867 | 3276 | G | A | 11 | 11 | --     | --     |
|            | Ca(ICC2/PI489777)SNP_01868 | 3951 | T | C | 3  | 6  | --     | --     |
| CakTC26577 | Ca(ICC2/PI489777)SNP_01869 | 497  | T | C | 28 | 10 | Mature | Leaf   |
|            | Ca(ICC2/PI489777)SNP_01870 | 1310 | T | A | 35 | 12 | Mature | Leaf   |
|            | Ca(ICC2/PI489777)SNP_01871 | 1405 | A | G | 24 | 7  | Mature | Leaf   |
| CakTC39557 | Ca(ICC2/PI489777)SNP_01872 | 31   | G | A | 3  | 3  | --     | --     |
| CakTC33270 | Ca(ICC2/PI489777)SNP_01873 | 466  | C | T | 13 | 7  | --     | --     |
|            | Ca(ICC2/PI489777)SNP_01874 | 643  | C | G | 8  | 3  | --     | --     |
|            | Ca(ICC2/PI489777)SNP_01875 | 1342 | C | G | 15 | 14 | --     | --     |
| CakTC28164 | Ca(ICC2/PI489777)SNP_01876 | 476  | T | C | 40 | 16 | --     | --     |
| CakTC24057 | Ca(ICC2/PI489777)SNP_01877 | 280  | A | G | 4  | 4  | Shoot  | --     |
|            | Ca(ICC2/PI489777)SNP_01878 | 445  | G | C | 4  | 3  | Shoot  | --     |
|            | Ca(ICC2/PI489777)SNP_01879 | 3354 | C | T | 3  | 4  | Shoot  | --     |
| CakTC34380 | Ca(ICC2/PI489777)SNP_01880 | 246  | C | G | 10 | 5  | --     | --     |
|            | Ca(ICC2/PI489777)SNP_01881 | 1812 | T | C | 15 | 13 | --     | --     |
|            | Ca(ICC2/PI489777)SNP_01882 | 1869 | G | A | 29 | 15 | --     | --     |
|            | Ca(ICC2/PI489777)SNP_01883 | 1995 | T | A | 13 | 10 | --     | --     |
| CakTC42418 | Ca(ICC2/PI489777)SNP_01884 | 563  | T | C | 5  | 6  | --     | --     |
| CakTC38233 | Ca(ICC2/PI489777)SNP_01885 | 642  | T | C | 7  | 3  | --     | --     |
|            | Ca(ICC2/PI489777)SNP_01886 | 690  | G | T | 6  | 3  | --     | --     |
| CakTC37628 | Ca(ICC2/PI489777)SNP_01887 | 471  | T | C | 6  | 4  | --     | --     |
| CakTC31173 | Ca(ICC2/PI489777)SNP_01888 | 747  | T | C | 3  | 3  | Root   | --     |
| CakTC33162 | Ca(ICC2/PI489777)SNP_01889 | 924  | A | C | 4  | 8  | --     | --     |
|            | Ca(ICC2/PI489777)SNP_01890 | 978  | A | T | 4  | 8  | --     | --     |
| CakTC30507 | Ca(ICC2/PI489777)SNP_01891 | 274  | T | C | 5  | 4  | --     | --     |
|            | Ca(ICC2/PI489777)SNP_01892 | 375  | G | A | 5  | 6  | --     | --     |
|            | Ca(ICC2/PI489777)SNP_01893 | 388  | T | C | 5  | 6  | --     | --     |
|            | Ca(ICC2/PI489777)SNP_01894 | 390  | A | G | 5  | 6  | --     | --     |
|            | Ca(ICC2/PI489777)SNP_01895 | 608  | A | C | 6  | 7  | --     | --     |
|            | Ca(ICC2/PI489777)SNP_01896 | 1167 | G | A | 3  | 3  | --     | --     |
|            | Ca(ICC2/PI489777)SNP_01897 | 1245 | A | G | 8  | 6  | --     | --     |
| CakTC23376 | Ca(ICC2/PI489777)SNP_01898 | 351  | T | C | 4  | 4  | Flower | bud    |
|            | Ca(ICC2/PI489777)SNP_01899 | 501  | T | C | 3  | 4  | Flower | bud    |
|            | Ca(ICC2/PI489777)SNP_01900 | 625  | G | A | 4  | 4  | Flower | bud    |
| CakTC42285 | Ca(ICC2/PI489777)SNP_01901 | 480  | A | C | 6  | 6  | --     | --     |
| CakTC26091 | Ca(ICC2/PI489777)SNP_01902 | 274  | C | A | 27 | 7  | --     | --     |
|            | Ca(ICC2/PI489777)SNP_01903 | 1363 | A | G | 17 | 10 | --     | --     |
|            | Ca(ICC2/PI489777)SNP_01904 | 1867 | T | C | 11 | 8  | --     | --     |
|            | Ca(ICC2/PI489777)SNP_01905 | 2555 | C | G | 25 | 8  | --     | --     |
|            | Ca(ICC2/PI489777)SNP_01906 | 2675 | G | A | 25 | 15 | --     | --     |
|            | Ca(ICC2/PI489777)SNP_01907 | 2794 | G | A | 24 | 12 | --     | --     |
| CakTC37223 | Ca(ICC2/PI489777)SNP_01908 | 276  | T | C | 11 | 8  | --     | --     |
| CakTC41348 | Ca(ICC2/PI489777)SNP_01909 | 497  | T | C | 12 | 6  | --     | --     |
|            | Ca(ICC2/PI489777)SNP_01910 | 1796 | T | C | 22 | 7  | --     | --     |
| CakTC10880 | Ca(ICC2/PI489777)SNP_01911 | 530  | T | C | 3  | 6  | --     | --     |
| CakTC27604 | Ca(ICC2/PI489777)SNP_01912 | 516  | A | G | 65 | 42 | --     | --     |
|            | Ca(ICC2/PI489777)SNP_01913 | 1224 | C | T | 85 | 41 | --     | --     |
|            | Ca(ICC2/PI489777)SNP_01914 | 2151 | A | G | 80 | 19 | --     | --     |
|            | Ca(ICC2/PI489777)SNP_01915 | 2160 | A | G | 77 | 23 | --     | --     |
| CakTC29246 | Ca(ICC2/PI489777)SNP_01916 | 32   | T | C | 7  | 5  | Flower | bud    |
|            | Ca(ICC2/PI489777)SNP_01917 | 64   | T | A | 17 | 12 | Flower | bud    |
|            | Ca(ICC2/PI489777)SNP_01918 | 75   | T | G | 19 | 13 | Flower | bud    |
|            | Ca(ICC2/PI489777)SNP_01919 | 124  | T | G | 20 | 15 | Flower | bud    |

|            |                             |      |   |   |    |    |        |         |
|------------|-----------------------------|------|---|---|----|----|--------|---------|
|            | Ca(ICCV2/PI489777)SNP_01920 | 610  | T | C | 37 | 14 | Flower | bud     |
|            | Ca(ICCV2/PI489777)SNP_01921 | 652  | C | T | 46 | 14 | Flower | bud     |
|            | Ca(ICCV2/PI489777)SNP_01922 | 845  | C | A | 56 | 13 | Flower | bud     |
| CakTC39940 | Ca(ICCV2/PI489777)SNP_01923 | 90   | G | C | 10 | 10 | --     | --      |
|            | Ca(ICCV2/PI489777)SNP_01924 | 130  | T | C | 10 | 10 | --     | --      |
|            | Ca(ICCV2/PI489777)SNP_01925 | 898  | G | A | 7  | 7  | --     | --      |
| CakTC28261 | Ca(ICCV2/PI489777)SNP_01926 | 517  | A | G | 4  | 3  | --     | Jumonji |
|            | Ca(ICCV2/PI489777)SNP_01927 | 655  | T | C | 5  | 3  | --     | Jumonji |
|            | Ca(ICCV2/PI489777)SNP_01928 | 1813 | C | T | 3  | 6  | --     | Jumonji |
|            | Ca(ICCV2/PI489777)SNP_01929 | 2047 | C | T | 3  | 3  | --     | Jumonji |
| CakTC25536 | Ca(ICCV2/PI489777)SNP_01930 | 120  | G | A | 13 | 5  | --     | C2H2    |
|            | Ca(ICCV2/PI489777)SNP_01931 | 248  | T | C | 19 | 5  | --     | C2H2    |
|            | Ca(ICCV2/PI489777)SNP_01932 | 366  | T | G | 19 | 6  | --     | C2H2    |
|            | Ca(ICCV2/PI489777)SNP_01933 | 418  | A | G | 21 | 3  | --     | C2H2    |
|            | Ca(ICCV2/PI489777)SNP_01934 | 497  | A | G | 18 | 3  | --     | C2H2    |
|            | Ca(ICCV2/PI489777)SNP_01935 | 523  | T | C | 17 | 5  | --     | C2H2    |
|            | Ca(ICCV2/PI489777)SNP_01936 | 616  | A | G | 12 | 5  | --     | C2H2    |
|            | Ca(ICCV2/PI489777)SNP_01937 | 763  | T | C | 25 | 8  | --     | C2H2    |
|            | Ca(ICCV2/PI489777)SNP_01938 | 838  | C | T | 23 | 7  | --     | C2H2    |
|            | Ca(ICCV2/PI489777)SNP_01939 | 1006 | C | A | 23 | 4  | --     | C2H2    |
| CakTC00909 | Ca(ICCV2/PI489777)SNP_01940 | 461  | G | C | 12 | 5  | --     | --      |
| CakTC28526 | Ca(ICCV2/PI489777)SNP_01941 | 455  | A | C | 10 | 8  | --     | --      |
| CakTC29912 | Ca(ICCV2/PI489777)SNP_01942 | 1437 | C | T | 17 | 7  | --     | --      |
|            | Ca(ICCV2/PI489777)SNP_01943 | 1689 | G | A | 7  | 8  | --     | --      |
|            | Ca(ICCV2/PI489777)SNP_01944 | 2262 | T | C | 6  | 6  | --     | --      |
|            | Ca(ICCV2/PI489777)SNP_01945 | 2425 | C | T | 5  | 11 | --     | --      |
| CakTC34946 | Ca(ICCV2/PI489777)SNP_01946 | 94   | C | T | 4  | 7  | --     | --      |
|            | Ca(ICCV2/PI489777)SNP_01947 | 96   | C | T | 5  | 7  | --     | --      |
|            | Ca(ICCV2/PI489777)SNP_01948 | 323  | T | C | 7  | 11 | --     | --      |
|            | Ca(ICCV2/PI489777)SNP_01949 | 722  | G | A | 3  | 5  | --     | --      |
|            | Ca(ICCV2/PI489777)SNP_01950 | 974  | C | G | 6  | 9  | --     | --      |
|            | Ca(ICCV2/PI489777)SNP_01951 | 1640 | G | A | 10 | 3  | --     | --      |
|            | Ca(ICCV2/PI489777)SNP_01952 | 2753 | C | A | 12 | 6  | --     | --      |
|            | Ca(ICCV2/PI489777)SNP_01953 | 3342 | C | G | 12 | 6  | --     | --      |
| CakTC37924 | Ca(ICCV2/PI489777)SNP_01954 | 1323 | T | C | 12 | 6  | --     | --      |
|            | Ca(ICCV2/PI489777)SNP_01955 | 1584 | C | T | 8  | 3  | --     | --      |
| CakTC40466 | Ca(ICCV2/PI489777)SNP_01956 | 233  | C | G | 20 | 10 | --     | --      |
|            | Ca(ICCV2/PI489777)SNP_01957 | 455  | A | G | 18 | 13 | --     | --      |
|            | Ca(ICCV2/PI489777)SNP_01958 | 484  | G | A | 17 | 14 | --     | --      |
|            | Ca(ICCV2/PI489777)SNP_01959 | 907  | A | G | 31 | 20 | --     | --      |
|            | Ca(ICCV2/PI489777)SNP_01960 | 946  | T | C | 28 | 17 | --     | --      |
|            | Ca(ICCV2/PI489777)SNP_01961 | 1030 | C | T | 33 | 20 | --     | --      |
|            | Ca(ICCV2/PI489777)SNP_01962 | 1890 | T | A | 13 | 5  | --     | --      |
| CakTC26349 | Ca(ICCV2/PI489777)SNP_01963 | 366  | G | T | 25 | 12 | --     | --      |
|            | Ca(ICCV2/PI489777)SNP_01964 | 411  | C | T | 24 | 15 | --     | --      |
| CakTC42060 | Ca(ICCV2/PI489777)SNP_01965 | 56   | T | C | 18 | 16 | --     | --      |
|            | Ca(ICCV2/PI489777)SNP_01966 | 62   | T | C | 20 | 16 | --     | --      |
|            | Ca(ICCV2/PI489777)SNP_01967 | 190  | A | G | 26 | 27 | --     | --      |
|            | Ca(ICCV2/PI489777)SNP_01968 | 598  | T | G | 23 | 21 | --     | --      |
| CakTC09686 | Ca(ICCV2/PI489777)SNP_01969 | 1637 | C | T | 7  | 4  | --     | --      |
| CakTC28200 | Ca(ICCV2/PI489777)SNP_01970 | 304  | G | T | 19 | 13 | --     | --      |
| CakTC31850 | Ca(ICCV2/PI489777)SNP_01971 | 105  | A | T | 9  | 12 | --     | --      |
|            | Ca(ICCV2/PI489777)SNP_01972 | 188  | G | C | 10 | 12 | --     | --      |
|            | Ca(ICCV2/PI489777)SNP_01973 | 294  | G | A | 9  | 9  | --     | --      |
|            | Ca(ICCV2/PI489777)SNP_01974 | 398  | T | G | 10 | 11 | --     | --      |
|            | Ca(ICCV2/PI489777)SNP_01975 | 413  | G | A | 8  | 11 | --     | --      |
|            | Ca(ICCV2/PI489777)SNP_01976 | 937  | T | C | 17 | 17 | --     | --      |
|            | Ca(ICCV2/PI489777)SNP_01977 | 967  | T | C | 18 | 19 | --     | --      |
|            | Ca(ICCV2/PI489777)SNP_01978 | 1063 | G | T | 17 | 23 | --     | --      |
|            | Ca(ICCV2/PI489777)SNP_01979 | 1116 | A | G | 16 | 26 | --     | --      |
|            | Ca(ICCV2/PI489777)SNP_01980 | 1156 | T | A | 17 | 24 | --     | --      |
|            | Ca(ICCV2/PI489777)SNP_01981 | 1234 | C | T | 15 | 23 | --     | --      |
|            | Ca(ICCV2/PI489777)SNP_01982 | 1311 | C | T | 6  | 20 | --     | --      |
|            | Ca(ICCV2/PI489777)SNP_01983 | 1369 | C | A | 6  | 13 | --     | --      |
|            | Ca(ICCV2/PI489777)SNP_01984 | 1551 | G | T | 4  | 3  | --     | --      |
| CakTC37382 | Ca(ICCV2/PI489777)SNP_01985 | 517  | C | T | 12 | 3  | --     | --      |
|            | Ca(ICCV2/PI489777)SNP_01986 | 808  | C | T | 8  | 10 | --     | --      |
|            | Ca(ICCV2/PI489777)SNP_01987 | 844  | A | G | 8  | 10 | --     | --      |
| CakTC36020 | Ca(ICCV2/PI489777)SNP_01988 | 731  | G | T | 24 | 3  | --     | --      |
|            | Ca(ICCV2/PI489777)SNP_01989 | 780  | G | C | 21 | 4  | --     | --      |
| CakTC29517 | Ca(ICCV2/PI489777)SNP_01990 | 1234 | C | T | 5  | 8  | --     | --      |
| CakTC33102 | Ca(ICCV2/PI489777)SNP_01991 | 168  | G | C | 24 | 16 | --     | --      |
|            | Ca(ICCV2/PI489777)SNP_01992 | 169  | C | G | 24 | 16 | --     | --      |
| CakTC25622 | Ca(ICCV2/PI489777)SNP_01993 | 261  | T | C | 10 | 5  | --     | --      |

|            |                            |      |   |   |    |    |        |           |
|------------|----------------------------|------|---|---|----|----|--------|-----------|
|            | Ca(ICC2/PI489777)SNP_01994 | 338  | G | A | 10 | 4  | --     | --        |
|            | Ca(ICC2/PI489777)SNP_01995 | 416  | G | A | 13 | 3  | --     | --        |
|            | Ca(ICC2/PI489777)SNP_01996 | 790  | T | C | 14 | 6  | --     | --        |
|            | Ca(ICC2/PI489777)SNP_01997 | 1097 | C | A | 9  | 12 | --     | --        |
|            | Ca(ICC2/PI489777)SNP_01998 | 1135 | C | A | 4  | 9  | --     | --        |
| CakTC34293 | Ca(ICC2/PI489777)SNP_01999 | 1178 | A | G | 7  | 4  | --     | --        |
|            | Ca(ICC2/PI489777)SNP_02000 | 1286 | G | C | 5  | 6  | --     | --        |
| CakTC39367 | Ca(ICC2/PI489777)SNP_02001 | 660  | C | A | 15 | 17 | --     | --        |
|            | Ca(ICC2/PI489777)SNP_02002 | 1296 | C | T | 10 | 10 | --     | --        |
|            | Ca(ICC2/PI489777)SNP_02003 | 1365 | G | A | 3  | 4  | --     | --        |
| CakTC41205 | Ca(ICC2/PI489777)SNP_02004 | 157  | A | C | 8  | 3  | --     | --        |
|            | Ca(ICC2/PI489777)SNP_02005 | 1426 | A | G | 9  | 6  | --     | --        |
|            | Ca(ICC2/PI489777)SNP_02006 | 1427 | G | T | 8  | 6  | --     | --        |
|            | Ca(ICC2/PI489777)SNP_02007 | 1533 | G | A | 9  | 10 | --     | --        |
|            | Ca(ICC2/PI489777)SNP_02008 | 1650 | G | T | 12 | 15 | --     | --        |
|            | Ca(ICC2/PI489777)SNP_02009 | 2264 | G | A | 5  | 9  | --     | --        |
| CakTC42526 | Ca(ICC2/PI489777)SNP_02010 | 569  | G | A | 83 | 35 | --     | --        |
|            | Ca(ICC2/PI489777)SNP_02011 | 686  | A | G | 90 | 23 | --     | --        |
|            | Ca(ICC2/PI489777)SNP_02012 | 941  | G | A | 53 | 13 | --     | --        |
| CakTC29530 | Ca(ICC2/PI489777)SNP_02013 | 96   | T | C | 11 | 13 | --     | --        |
|            | Ca(ICC2/PI489777)SNP_02014 | 101  | A | G | 18 | 20 | --     | --        |
|            | Ca(ICC2/PI489777)SNP_02015 | 528  | A | G | 57 | 32 | --     | --        |
| CakTC38470 | Ca(ICC2/PI489777)SNP_02016 | 141  | T | C | 21 | 7  | Flower | bud       |
|            | Ca(ICC2/PI489777)SNP_02017 | 674  | A | G | 17 | 7  | Flower | bud       |
|            | Ca(ICC2/PI489777)SNP_02018 | 740  | T | C | 19 | 6  | Flower | bud       |
|            | Ca(ICC2/PI489777)SNP_02019 | 965  | G | A | 10 | 4  | Flower | bud       |
|            | Ca(ICC2/PI489777)SNP_02020 | 1047 | T | G | 9  | 4  | Flower | bud       |
|            | Ca(ICC2/PI489777)SNP_02021 | 1076 | G | C | 9  | 4  | Flower | bud       |
| CakTC42399 | Ca(ICC2/PI489777)SNP_02022 | 415  | G | A | 4  | 4  | --     | --        |
|            | Ca(ICC2/PI489777)SNP_02023 | 436  | C | T | 4  | 3  | --     | --        |
|            | Ca(ICC2/PI489777)SNP_02024 | 640  | C | A | 10 | 5  | --     | --        |
|            | Ca(ICC2/PI489777)SNP_02025 | 964  | C | T | 6  | 3  | --     | --        |
|            | Ca(ICC2/PI489777)SNP_02026 | 1118 | C | T | 6  | 4  | --     | --        |
|            | Ca(ICC2/PI489777)SNP_02027 | 1127 | T | G | 6  | 4  | --     | --        |
|            | Ca(ICC2/PI489777)SNP_02028 | 1160 | G | C | 5  | 3  | --     | --        |
|            | Ca(ICC2/PI489777)SNP_02029 | 1576 | T | A | 6  | 5  | --     | --        |
| CakTC27891 | Ca(ICC2/PI489777)SNP_02030 | 1073 | A | G | 9  | 7  | --     | --        |
|            | Ca(ICC2/PI489777)SNP_02031 | 1586 | T | C | 18 | 16 | --     | --        |
|            | Ca(ICC2/PI489777)SNP_02032 | 1635 | G | A | 17 | 14 | --     | --        |
|            | Ca(ICC2/PI489777)SNP_02033 | 1637 | T | G | 17 | 14 | --     | --        |
|            | Ca(ICC2/PI489777)SNP_02034 | 1721 | T | C | 14 | 11 | --     | --        |
| CakTC42351 | Ca(ICC2/PI489777)SNP_02035 | 151  | C | A | 13 | 3  | Shoot  | --        |
|            | Ca(ICC2/PI489777)SNP_02036 | 391  | C | T | 19 | 4  | Shoot  | --        |
|            | Ca(ICC2/PI489777)SNP_02037 | 427  | A | G | 17 | 5  | Shoot  | --        |
| CakTC10457 | Ca(ICC2/PI489777)SNP_02038 | 168  | G | A | 6  | 3  | --     | --        |
| CakTC28158 | Ca(ICC2/PI489777)SNP_02039 | 424  | T | C | 20 | 14 | --     | --        |
|            | Ca(ICC2/PI489777)SNP_02040 | 436  | C | T | 19 | 13 | --     | --        |
|            | Ca(ICC2/PI489777)SNP_02041 | 592  | G | T | 25 | 7  | --     | --        |
|            | Ca(ICC2/PI489777)SNP_02042 | 700  | C | G | 18 | 12 | --     | --        |
|            | Ca(ICC2/PI489777)SNP_02043 | 947  | A | G | 30 | 17 | --     | --        |
|            | Ca(ICC2/PI489777)SNP_02044 | 1057 | C | A | 27 | 11 | --     | --        |
|            | Ca(ICC2/PI489777)SNP_02045 | 1781 | C | T | 21 | 9  | --     | --        |
|            | Ca(ICC2/PI489777)SNP_02046 | 1808 | G | A | 20 | 9  | --     | --        |
|            | Ca(ICC2/PI489777)SNP_02047 | 1916 | G | A | 23 | 9  | --     | --        |
|            | Ca(ICC2/PI489777)SNP_02048 | 2056 | C | A | 36 | 10 | --     | --        |
|            | Ca(ICC2/PI489777)SNP_02049 | 2258 | C | T | 18 | 7  | --     | --        |
|            | Ca(ICC2/PI489777)SNP_02050 | 2347 | G | A | 15 | 7  | --     | --        |
| CakTC30308 | Ca(ICC2/PI489777)SNP_02051 | 24   | G | C | 4  | 3  | --     | --        |
|            | Ca(ICC2/PI489777)SNP_02052 | 45   | G | A | 4  | 3  | --     | --        |
|            | Ca(ICC2/PI489777)SNP_02053 | 94   | A | G | 4  | 3  | --     | --        |
|            | Ca(ICC2/PI489777)SNP_02054 | 103  | G | C | 4  | 3  | --     | --        |
|            | Ca(ICC2/PI489777)SNP_02055 | 108  | G | A | 4  | 3  | --     | --        |
|            | Ca(ICC2/PI489777)SNP_02056 | 133  | T | C | 4  | 3  | --     | --        |
|            | Ca(ICC2/PI489777)SNP_02057 | 190  | A | C | 4  | 4  | --     | --        |
|            | Ca(ICC2/PI489777)SNP_02058 | 312  | A | G | 5  | 4  | --     | --        |
| CakTC38398 | Ca(ICC2/PI489777)SNP_02059 | 477  | G | A | 5  | 6  | --     | --        |
|            | Ca(ICC2/PI489777)SNP_02060 | 511  | G | A | 5  | 5  | --     | --        |
|            | Ca(ICC2/PI489777)SNP_02061 | 741  | T | C | 3  | 4  | --     | --        |
| CakTC37844 | Ca(ICC2/PI489777)SNP_02062 | 212  | C | T | 12 | 3  | --     | --        |
|            | Ca(ICC2/PI489777)SNP_02063 | 418  | C | G | 24 | 20 | --     | --        |
|            | Ca(ICC2/PI489777)SNP_02064 | 878  | C | T | 16 | 15 | --     | --        |
| CakTC31172 | Ca(ICC2/PI489777)SNP_02065 | 1117 | G | T | 5  | 7  | --     | --        |
| CakTC38880 | Ca(ICC2/PI489777)SNP_02066 | 245  | A | G | 3  | 3  | --     | AP2-EREBP |
|            | Ca(ICC2/PI489777)SNP_02067 | 343  | G | A | 15 | 5  | --     | AP2-EREBP |

|            |                            |      |   |   |    |    |        |           |
|------------|----------------------------|------|---|---|----|----|--------|-----------|
|            | Ca(ICC2/PI489777)SNP_02068 | 361  | G | T | 16 | 5  | --     | AP2-EREBP |
|            | Ca(ICC2/PI489777)SNP_02069 | 364  | C | T | 15 | 5  | --     | AP2-EREBP |
|            | Ca(ICC2/PI489777)SNP_02070 | 379  | C | A | 16 | 5  | --     | AP2-EREBP |
|            | Ca(ICC2/PI489777)SNP_02071 | 826  | G | C | 20 | 4  | --     | AP2-EREBP |
|            | Ca(ICC2/PI489777)SNP_02072 | 1153 | A | G | 11 | 8  | --     | AP2-EREBP |
|            | Ca(ICC2/PI489777)SNP_02073 | 1385 | G | C | 18 | 3  | --     | AP2-EREBP |
|            | Ca(ICC2/PI489777)SNP_02074 | 1403 | G | A | 18 | 3  | --     | AP2-EREBP |
| CakTC40202 | Ca(ICC2/PI489777)SNP_02075 | 114  | A | C | 5  | 4  | --     | --        |
|            | Ca(ICC2/PI489777)SNP_02076 | 242  | T | G | 5  | 4  | --     | --        |
| CakTC41461 | Ca(ICC2/PI489777)SNP_02077 | 73   | T | C | 3  | 3  | --     | --        |
|            | Ca(ICC2/PI489777)SNP_02078 | 363  | A | T | 10 | 7  | --     | --        |
|            | Ca(ICC2/PI489777)SNP_02079 | 425  | T | C | 13 | 6  | --     | --        |
|            | Ca(ICC2/PI489777)SNP_02080 | 646  | T | C | 15 | 4  | --     | --        |
|            | Ca(ICC2/PI489777)SNP_02081 | 896  | A | G | 12 | 4  | --     | --        |
|            | Ca(ICC2/PI489777)SNP_02082 | 905  | A | G | 12 | 4  | --     | --        |
|            | Ca(ICC2/PI489777)SNP_02083 | 983  | A | G | 14 | 4  | --     | --        |
|            | Ca(ICC2/PI489777)SNP_02084 | 1225 | C | T | 11 | 3  | --     | --        |
|            | Ca(ICC2/PI489777)SNP_02085 | 1914 | C | G | 7  | 4  | --     | --        |
|            | Ca(ICC2/PI489777)SNP_02086 | 2039 | C | T | 10 | 4  | --     | --        |
|            | Ca(ICC2/PI489777)SNP_02087 | 2089 | C | A | 9  | 4  | --     | --        |
| CakTC39799 | Ca(ICC2/PI489777)SNP_02088 | 1206 | T | C | 26 | 10 | --     | bZIP      |
|            | Ca(ICC2/PI489777)SNP_02089 | 1262 | C | T | 26 | 9  | --     | bZIP      |
| CakTC31257 | Ca(ICC2/PI489777)SNP_02090 | 2485 | T | A | 14 | 5  | --     | --        |
| CakTC31139 | Ca(ICC2/PI489777)SNP_02091 | 691  | A | G | 5  | 3  | --     | SRS       |
|            | Ca(ICC2/PI489777)SNP_02092 | 781  | T | C | 5  | 5  | --     | SRS       |
|            | Ca(ICC2/PI489777)SNP_02093 | 949  | A | T | 9  | 6  | --     | SRS       |
|            | Ca(ICC2/PI489777)SNP_02094 | 985  | A | T | 10 | 6  | --     | SRS       |
| CakTC33266 | Ca(ICC2/PI489777)SNP_02095 | 200  | A | C | 7  | 5  | --     | --        |
|            | Ca(ICC2/PI489777)SNP_02096 | 640  | G | A | 17 | 9  | --     | --        |
|            | Ca(ICC2/PI489777)SNP_02097 | 2161 | G | T | 6  | 11 | --     | --        |
| CakTC28769 | Ca(ICC2/PI489777)SNP_02098 | 130  | C | T | 6  | 3  | --     | --        |
|            | Ca(ICC2/PI489777)SNP_02099 | 669  | A | T | 4  | 5  | --     | --        |
|            | Ca(ICC2/PI489777)SNP_02100 | 1908 | T | C | 7  | 5  | --     | --        |
| CakTC11489 | Ca(ICC2/PI489777)SNP_02101 | 49   | C | T | 3  | 9  | --     | --        |
|            | Ca(ICC2/PI489777)SNP_02102 | 121  | A | G | 3  | 11 | --     | --        |
|            | Ca(ICC2/PI489777)SNP_02103 | 200  | A | C | 3  | 12 | --     | --        |
|            | Ca(ICC2/PI489777)SNP_02104 | 223  | A | G | 5  | 12 | --     | --        |
|            | Ca(ICC2/PI489777)SNP_02105 | 241  | G | A | 5  | 12 | --     | --        |
|            | Ca(ICC2/PI489777)SNP_02106 | 460  | T | C | 7  | 6  | --     | --        |
|            | Ca(ICC2/PI489777)SNP_02107 | 1228 | C | G | 10 | 5  | --     | --        |
|            | Ca(ICC2/PI489777)SNP_02108 | 1294 | C | T | 6  | 6  | --     | --        |
| CakTC28585 | Ca(ICC2/PI489777)SNP_02109 | 794  | A | T | 34 | 24 | --     | --        |
|            | Ca(ICC2/PI489777)SNP_02110 | 838  | G | A | 32 | 22 | --     | --        |
|            | Ca(ICC2/PI489777)SNP_02111 | 863  | C | T | 26 | 24 | --     | --        |
| CakTC43142 | Ca(ICC2/PI489777)SNP_02112 | 412  | C | T | 58 | 30 | --     | --        |
|            | Ca(ICC2/PI489777)SNP_02113 | 619  | C | T | 39 | 38 | --     | --        |
|            | Ca(ICC2/PI489777)SNP_02114 | 910  | A | G | 43 | 10 | --     | --        |
|            | Ca(ICC2/PI489777)SNP_02115 | 974  | G | A | 39 | 10 | --     | --        |
|            | Ca(ICC2/PI489777)SNP_02116 | 1031 | T | C | 46 | 7  | --     | --        |
|            | Ca(ICC2/PI489777)SNP_02117 | 1032 | G | A | 51 | 8  | --     | --        |
|            | Ca(ICC2/PI489777)SNP_02118 | 1169 | T | C | 30 | 11 | --     | --        |
|            | Ca(ICC2/PI489777)SNP_02119 | 1448 | A | G | 21 | 20 | --     | --        |
|            | Ca(ICC2/PI489777)SNP_02120 | 1699 | G | A | 19 | 11 | --     | --        |
|            | Ca(ICC2/PI489777)SNP_02121 | 1763 | A | G | 15 | 9  | --     | --        |
|            | Ca(ICC2/PI489777)SNP_02122 | 3551 | C | T | 4  | 6  | --     | --        |
| CakTC33758 | Ca(ICC2/PI489777)SNP_02123 | 570  | T | C | 5  | 10 | --     | --        |
| CakTC42312 | Ca(ICC2/PI489777)SNP_02124 | 641  | A | G | 15 | 3  | Flower | bud       |
| CakTC39077 | Ca(ICC2/PI489777)SNP_02125 | 384  | G | A | 6  | 36 | --     | --        |
|            | Ca(ICC2/PI489777)SNP_02126 | 436  | C | G | 7  | 31 | --     | --        |
|            | Ca(ICC2/PI489777)SNP_02127 | 546  | G | C | 10 | 25 | --     | --        |
|            | Ca(ICC2/PI489777)SNP_02128 | 915  | G | A | 6  | 9  | --     | --        |
|            | Ca(ICC2/PI489777)SNP_02129 | 1011 | A | T | 7  | 10 | --     | --        |
|            | Ca(ICC2/PI489777)SNP_02130 | 1022 | C | T | 7  | 11 | --     | --        |
|            | Ca(ICC2/PI489777)SNP_02131 | 1170 | A | C | 4  | 11 | --     | --        |
|            | Ca(ICC2/PI489777)SNP_02132 | 1227 | A | G | 3  | 11 | --     | --        |
| CakTC31396 | Ca(ICC2/PI489777)SNP_02133 | 402  | C | T | 20 | 7  | --     | --        |
|            | Ca(ICC2/PI489777)SNP_02134 | 413  | A | C | 19 | 7  | --     | --        |
|            | Ca(ICC2/PI489777)SNP_02135 | 725  | C | T | 19 | 6  | --     | --        |
|            | Ca(ICC2/PI489777)SNP_02136 | 965  | A | G | 23 | 7  | --     | --        |
|            | Ca(ICC2/PI489777)SNP_02137 | 1118 | C | G | 21 | 5  | --     | --        |
|            | Ca(ICC2/PI489777)SNP_02138 | 1119 | G | T | 14 | 5  | --     | --        |
|            | Ca(ICC2/PI489777)SNP_02139 | 1298 | A | G | 21 | 7  | --     | --        |
|            | Ca(ICC2/PI489777)SNP_02140 | 1911 | C | T | 15 | 3  | --     | --        |
|            | Ca(ICC2/PI489777)SNP_02141 | 2207 | A | G | 9  | 5  | --     | --        |

|            |                            |      |   |   |    |    |        |      |
|------------|----------------------------|------|---|---|----|----|--------|------|
| CakTC33325 | Ca(ICC2/PI489777)SNP_02142 | 394  | T | C | 13 | 9  | --     | --   |
|            | Ca(ICC2/PI489777)SNP_02143 | 427  | G | C | 11 | 11 | --     | --   |
|            | Ca(ICC2/PI489777)SNP_02144 | 1228 | T | G | 20 | 11 | --     | --   |
|            | Ca(ICC2/PI489777)SNP_02145 | 1567 | G | A | 18 | 8  | --     | --   |
|            | Ca(ICC2/PI489777)SNP_02146 | 1605 | A | G | 22 | 7  | --     | --   |
|            | Ca(ICC2/PI489777)SNP_02147 | 1755 | T | A | 11 | 4  | --     | --   |
|            | Ca(ICC2/PI489777)SNP_02148 | 1855 | A | T | 12 | 6  | --     | --   |
|            | Ca(ICC2/PI489777)SNP_02149 | 2060 | A | T | 11 | 5  | --     | --   |
|            | Ca(ICC2/PI489777)SNP_02150 | 2071 | T | G | 12 | 5  | --     | --   |
| CakTC33494 | Ca(ICC2/PI489777)SNP_02151 | 364  | G | C | 10 | 5  | Mature | Leaf |
|            | Ca(ICC2/PI489777)SNP_02152 | 578  | C | T | 6  | 3  | Mature | Leaf |
|            | Ca(ICC2/PI489777)SNP_02153 | 5147 | T | G | 16 | 9  | Mature | Leaf |
|            | Ca(ICC2/PI489777)SNP_02154 | 6413 | G | A | 20 | 7  | Mature | Leaf |
| CakTC28614 | Ca(ICC2/PI489777)SNP_02155 | 492  | T | A | 5  | 5  | --     | --   |
|            | Ca(ICC2/PI489777)SNP_02156 | 504  | T | C | 4  | 4  | --     | --   |
|            | Ca(ICC2/PI489777)SNP_02157 | 1281 | G | A | 4  | 4  | --     | --   |
|            | Ca(ICC2/PI489777)SNP_02158 | 1290 | C | T | 4  | 4  | --     | --   |
|            | Ca(ICC2/PI489777)SNP_02159 | 2269 | C | A | 11 | 4  | --     | --   |
|            | Ca(ICC2/PI489777)SNP_02160 | 2351 | G | C | 6  | 3  | --     | --   |
| CakTC29746 | Ca(ICC2/PI489777)SNP_02161 | 860  | G | C | 5  | 3  | --     | --   |
| CakTC34127 | Ca(ICC2/PI489777)SNP_02162 | 260  | G | A | 7  | 4  | --     | --   |
|            | Ca(ICC2/PI489777)SNP_02163 | 346  | T | C | 10 | 4  | --     | --   |
|            | Ca(ICC2/PI489777)SNP_02164 | 736  | C | T | 11 | 4  | --     | --   |
|            | Ca(ICC2/PI489777)SNP_02165 | 940  | T | A | 9  | 6  | --     | --   |
|            | Ca(ICC2/PI489777)SNP_02166 | 1166 | A | G | 5  | 4  | --     | --   |
|            | Ca(ICC2/PI489777)SNP_02167 | 1175 | C | T | 5  | 3  | --     | --   |
|            | Ca(ICC2/PI489777)SNP_02168 | 1191 | A | G | 5  | 4  | --     | --   |
| CakTC10683 | Ca(ICC2/PI489777)SNP_02169 | 1055 | A | G | 7  | 4  | --     | --   |
| CakTC39401 | Ca(ICC2/PI489777)SNP_02170 | 185  | G | T | 3  | 10 | --     | --   |
|            | Ca(ICC2/PI489777)SNP_02171 | 257  | G | C | 4  | 11 | --     | --   |
|            | Ca(ICC2/PI489777)SNP_02172 | 524  | G | A | 16 | 16 | --     | --   |
|            | Ca(ICC2/PI489777)SNP_02173 | 573  | G | C | 16 | 17 | --     | --   |
|            | Ca(ICC2/PI489777)SNP_02174 | 725  | C | T | 21 | 14 | --     | --   |
|            | Ca(ICC2/PI489777)SNP_02175 | 1175 | C | T | 15 | 4  | --     | --   |
| CakTC10785 | Ca(ICC2/PI489777)SNP_02176 | 241  | T | C | 6  | 5  | --     | --   |
|            | Ca(ICC2/PI489777)SNP_02177 | 304  | T | C | 6  | 6  | --     | --   |
|            | Ca(ICC2/PI489777)SNP_02178 | 421  | T | C | 10 | 5  | --     | --   |
|            | Ca(ICC2/PI489777)SNP_02179 | 475  | G | A | 13 | 9  | --     | --   |
|            | Ca(ICC2/PI489777)SNP_02180 | 730  | T | C | 14 | 7  | --     | --   |
|            | Ca(ICC2/PI489777)SNP_02181 | 1381 | A | G | 5  | 10 | --     | --   |
| CakTC11480 | Ca(ICC2/PI489777)SNP_02182 | 544  | A | T | 9  | 7  | --     | --   |
|            | Ca(ICC2/PI489777)SNP_02183 | 688  | A | T | 10 | 12 | --     | --   |
|            | Ca(ICC2/PI489777)SNP_02184 | 1744 | T | G | 12 | 4  | --     | --   |
| CakTC30656 | Ca(ICC2/PI489777)SNP_02185 | 387  | T | C | 10 | 3  | --     | MYB  |
|            | Ca(ICC2/PI489777)SNP_02186 | 1083 | T | C | 3  | 5  | --     | MYB  |
|            | Ca(ICC2/PI489777)SNP_02187 | 1816 | T | C | 3  | 5  | --     | MYB  |
| CakTC25342 | Ca(ICC2/PI489777)SNP_02188 | 85   | T | C | 15 | 3  | --     | --   |
| CakTC29849 | Ca(ICC2/PI489777)SNP_02189 | 403  | A | G | 9  | 4  | --     | --   |
| CakTC31016 | Ca(ICC2/PI489777)SNP_02190 | 579  | G | A | 39 | 13 | Flower | bud  |
|            | Ca(ICC2/PI489777)SNP_02191 | 694  | T | C | 38 | 15 | Flower | bud  |
| CakTC42182 | Ca(ICC2/PI489777)SNP_02192 | 519  | A | C | 4  | 3  | --     | --   |
|            | Ca(ICC2/PI489777)SNP_02193 | 618  | C | T | 3  | 3  | --     | --   |
|            | Ca(ICC2/PI489777)SNP_02194 | 857  | A | G | 4  | 3  | --     | --   |
| CakTC10990 | Ca(ICC2/PI489777)SNP_02195 | 377  | A | G | 4  | 3  | --     | --   |
| CakTC40175 | Ca(ICC2/PI489777)SNP_02196 | 1540 | A | G | 26 | 14 | --     | --   |
| CakTC24323 | Ca(ICC2/PI489777)SNP_02197 | 168  | T | C | 6  | 3  | --     | --   |
|            | Ca(ICC2/PI489777)SNP_02198 | 185  | T | G | 6  | 3  | --     | --   |
|            | Ca(ICC2/PI489777)SNP_02199 | 207  | G | A | 6  | 3  | --     | --   |
|            | Ca(ICC2/PI489777)SNP_02200 | 232  | G | C | 6  | 3  | --     | --   |
| CakTC28558 | Ca(ICC2/PI489777)SNP_02201 | 326  | A | G | 24 | 15 | --     | --   |
|            | Ca(ICC2/PI489777)SNP_02202 | 564  | C | G | 21 | 17 | --     | --   |
|            | Ca(ICC2/PI489777)SNP_02203 | 1467 | T | C | 18 | 8  | --     | --   |
|            | Ca(ICC2/PI489777)SNP_02204 | 3172 | C | A | 25 | 24 | --     | --   |
|            | Ca(ICC2/PI489777)SNP_02205 | 3177 | A | T | 26 | 23 | --     | --   |
| CakTC38563 | Ca(ICC2/PI489777)SNP_02206 | 769  | T | G | 20 | 16 | --     | --   |
| CakTC37159 | Ca(ICC2/PI489777)SNP_02207 | 749  | G | A | 9  | 13 | --     | --   |
|            | Ca(ICC2/PI489777)SNP_02208 | 766  | G | A | 9  | 11 | --     | --   |
|            | Ca(ICC2/PI489777)SNP_02209 | 846  | T | A | 7  | 6  | --     | --   |
|            | Ca(ICC2/PI489777)SNP_02210 | 1160 | C | T | 4  | 5  | --     | --   |
| CakTC34377 | Ca(ICC2/PI489777)SNP_02211 | 1427 | C | T | 6  | 5  | --     | --   |
|            | Ca(ICC2/PI489777)SNP_02212 | 1470 | A | G | 7  | 5  | --     | --   |
|            | Ca(ICC2/PI489777)SNP_02213 | 1938 | A | T | 14 | 3  | --     | --   |
| CakTC42484 | Ca(ICC2/PI489777)SNP_02214 | 193  | C | T | 8  | 5  | --     | --   |
| CakTC43345 | Ca(ICC2/PI489777)SNP_02215 | 240  | G | A | 35 | 15 | --     | --   |

|            |                            |      |   |   |    |    |      |    |
|------------|----------------------------|------|---|---|----|----|------|----|
|            | Ca(ICC2/PI489777)SNP_02216 | 243  | T | C | 34 | 13 | --   | -- |
|            | Ca(ICC2/PI489777)SNP_02217 | 432  | G | A | 48 | 21 | --   | -- |
| CakTC09707 | Ca(ICC2/PI489777)SNP_02218 | 685  | T | C | 30 | 9  | --   | -- |
| CakTC22849 | Ca(ICC2/PI489777)SNP_02219 | 140  | C | A | 4  | 3  | --   | -- |
| CakTC37384 | Ca(ICC2/PI489777)SNP_02220 | 948  | A | G | 3  | 16 | Root | -- |
|            | Ca(ICC2/PI489777)SNP_02221 | 959  | C | T | 3  | 15 | Root | -- |
| CakTC38481 | Ca(ICC2/PI489777)SNP_02222 | 1130 | T | C | 31 | 21 | --   | -- |
|            | Ca(ICC2/PI489777)SNP_02223 | 1546 | T | C | 14 | 28 | --   | -- |
|            | Ca(ICC2/PI489777)SNP_02224 | 1624 | G | T | 8  | 4  | --   | -- |
| CakTC37619 | Ca(ICC2/PI489777)SNP_02225 | 59   | C | T | 33 | 7  | --   | -- |
|            | Ca(ICC2/PI489777)SNP_02226 | 975  | C | T | 41 | 15 | --   | -- |
|            | Ca(ICC2/PI489777)SNP_02227 | 1420 | T | G | 11 | 13 | --   | -- |
| CakTC25587 | Ca(ICC2/PI489777)SNP_02228 | 1059 | C | A | 20 | 10 | --   | -- |
|            | Ca(ICC2/PI489777)SNP_02229 | 1211 | T | C | 15 | 6  | --   | -- |
|            | Ca(ICC2/PI489777)SNP_02230 | 1336 | T | G | 7  | 3  | --   | -- |
| CakTC24716 | Ca(ICC2/PI489777)SNP_02231 | 1193 | G | A | 22 | 3  | --   | -- |
|            | Ca(ICC2/PI489777)SNP_02232 | 1219 | C | T | 22 | 5  | --   | -- |
|            | Ca(ICC2/PI489777)SNP_02233 | 1528 | T | A | 9  | 4  | --   | -- |
| CakTC39138 | Ca(ICC2/PI489777)SNP_02234 | 1570 | A | G | 5  | 4  | --   | -- |
| CakTC29328 | Ca(ICC2/PI489777)SNP_02235 | 75   | T | C | 3  | 6  | --   | -- |
|            | Ca(ICC2/PI489777)SNP_02236 | 234  | C | G | 3  | 5  | --   | -- |
|            | Ca(ICC2/PI489777)SNP_02237 | 470  | T | C | 6  | 5  | --   | -- |
|            | Ca(ICC2/PI489777)SNP_02238 | 620  | T | C | 7  | 5  | --   | -- |
|            | Ca(ICC2/PI489777)SNP_02239 | 842  | T | C | 9  | 4  | --   | -- |
|            | Ca(ICC2/PI489777)SNP_02240 | 910  | A | C | 10 | 5  | --   | -- |
|            | Ca(ICC2/PI489777)SNP_02241 | 1008 | A | C | 10 | 5  | --   | -- |
| CakTC30850 | Ca(ICC2/PI489777)SNP_02242 | 2271 | G | C | 3  | 7  | --   | -- |
| CakTC32274 | Ca(ICC2/PI489777)SNP_02243 | 319  | T | C | 4  | 3  | --   | -- |
|            | Ca(ICC2/PI489777)SNP_02244 | 818  | T | C | 4  | 4  | --   | -- |
| CakTC40296 | Ca(ICC2/PI489777)SNP_02245 | 125  | T | C | 4  | 5  | --   | -- |
| CakTC35138 | Ca(ICC2/PI489777)SNP_02246 | 704  | C | T | 8  | 6  | --   | -- |
|            | Ca(ICC2/PI489777)SNP_02247 | 943  | T | G | 12 | 11 | --   | -- |
|            | Ca(ICC2/PI489777)SNP_02248 | 945  | A | T | 13 | 11 | --   | -- |
|            | Ca(ICC2/PI489777)SNP_02249 | 1144 | T | G | 14 | 12 | --   | -- |
|            | Ca(ICC2/PI489777)SNP_02250 | 1923 | C | T | 13 | 9  | --   | -- |
|            | Ca(ICC2/PI489777)SNP_02251 | 2476 | G | A | 6  | 3  | --   | -- |
|            | Ca(ICC2/PI489777)SNP_02252 | 2828 | A | G | 16 | 6  | --   | -- |
|            | Ca(ICC2/PI489777)SNP_02253 | 3393 | G | A | 9  | 5  | --   | -- |
|            | Ca(ICC2/PI489777)SNP_02254 | 3397 | T | C | 8  | 5  | --   | -- |
|            | Ca(ICC2/PI489777)SNP_02255 | 3435 | G | T | 8  | 5  | --   | -- |
| CakTC29196 | Ca(ICC2/PI489777)SNP_02256 | 230  | T | C | 54 | 19 | --   | -- |
|            | Ca(ICC2/PI489777)SNP_02257 | 254  | C | T | 60 | 18 | --   | -- |
|            | Ca(ICC2/PI489777)SNP_02258 | 258  | A | G | 58 | 19 | --   | -- |
|            | Ca(ICC2/PI489777)SNP_02259 | 731  | A | C | 47 | 31 | --   | -- |
|            | Ca(ICC2/PI489777)SNP_02260 | 866  | G | A | 54 | 23 | --   | -- |
| CakTC38102 | Ca(ICC2/PI489777)SNP_02261 | 242  | A | G | 4  | 4  | --   | -- |
|            | Ca(ICC2/PI489777)SNP_02262 | 613  | A | G | 4  | 4  | --   | -- |
|            | Ca(ICC2/PI489777)SNP_02263 | 626  | G | C | 4  | 5  | --   | -- |
| CakTC39565 | Ca(ICC2/PI489777)SNP_02264 | 413  | C | T | 43 | 21 | --   | -- |
|            | Ca(ICC2/PI489777)SNP_02265 | 488  | T | C | 40 | 26 | --   | -- |
|            | Ca(ICC2/PI489777)SNP_02266 | 560  | G | T | 25 | 22 | --   | -- |
| CakTC07910 | Ca(ICC2/PI489777)SNP_02267 | 1394 | A | T | 6  | 7  | --   | -- |
|            | Ca(ICC2/PI489777)SNP_02268 | 2006 | T | C | 13 | 5  | --   | -- |
| CakTC22934 | Ca(ICC2/PI489777)SNP_02269 | 1158 | G | A | 26 | 3  | --   | -- |
|            | Ca(ICC2/PI489777)SNP_02270 | 1398 | G | A | 32 | 18 | --   | -- |
| CakTC25259 | Ca(ICC2/PI489777)SNP_02271 | 171  | G | C | 8  | 3  | --   | -- |
|            | Ca(ICC2/PI489777)SNP_02272 | 399  | C | T | 12 | 8  | --   | -- |
|            | Ca(ICC2/PI489777)SNP_02273 | 2436 | A | G | 9  | 3  | --   | -- |
| CakTC28097 | Ca(ICC2/PI489777)SNP_02274 | 1172 | T | G | 6  | 3  | --   | -- |
| CakTC25886 | Ca(ICC2/PI489777)SNP_02275 | 1021 | A | C | 11 | 11 | --   | -- |
| CakTC31673 | Ca(ICC2/PI489777)SNP_02276 | 472  | G | C | 11 | 9  | --   | -- |
|            | Ca(ICC2/PI489777)SNP_02277 | 528  | A | T | 12 | 7  | --   | -- |
|            | Ca(ICC2/PI489777)SNP_02278 | 739  | A | G | 12 | 6  | --   | -- |
| CakTC43126 | Ca(ICC2/PI489777)SNP_02279 | 640  | T | C | 25 | 10 | --   | -- |
|            | Ca(ICC2/PI489777)SNP_02280 | 775  | C | T | 32 | 20 | --   | -- |
| CakTC38401 | Ca(ICC2/PI489777)SNP_02281 | 999  | T | G | 6  | 20 | --   | -- |
| CakTC25785 | Ca(ICC2/PI489777)SNP_02282 | 1221 | T | C | 15 | 5  | --   | -- |
|            | Ca(ICC2/PI489777)SNP_02283 | 1580 | T | A | 6  | 5  | --   | -- |
|            | Ca(ICC2/PI489777)SNP_02284 | 1863 | G | C | 15 | 11 | --   | -- |
|            | Ca(ICC2/PI489777)SNP_02285 | 1866 | G | A | 15 | 10 | --   | -- |
|            | Ca(ICC2/PI489777)SNP_02286 | 1979 | G | C | 14 | 8  | --   | -- |
| CakTC26971 | Ca(ICC2/PI489777)SNP_02287 | 119  | A | G | 4  | 5  | --   | -- |
|            | Ca(ICC2/PI489777)SNP_02288 | 582  | C | T | 5  | 3  | --   | -- |
| CakTC29299 | Ca(ICC2/PI489777)SNP_02289 | 374  | T | G | 7  | 6  | --   | -- |

|            |                            |      |   |   |     |    |        |      |
|------------|----------------------------|------|---|---|-----|----|--------|------|
|            | Ca(ICC2/PI489777)SNP_02290 | 1657 | A | G | 4   | 4  | --     | --   |
| CakTC29074 | Ca(ICC2/PI489777)SNP_02291 | 900  | G | C | 16  | 19 | Flower | bud  |
| CakTC42306 | Ca(ICC2/PI489777)SNP_02292 | 984  | C | T | 9   | 8  | --     | --   |
|            | Ca(ICC2/PI489777)SNP_02293 | 1287 | C | T | 8   | 6  | --     | --   |
| CakTC22667 | Ca(ICC2/PI489777)SNP_02294 | 2963 | C | T | 10  | 3  | --     | --   |
|            | Ca(ICC2/PI489777)SNP_02295 | 2989 | A | G | 9   | 3  | --     | --   |
|            | Ca(ICC2/PI489777)SNP_02296 | 3141 | C | T | 15  | 3  | --     | --   |
|            | Ca(ICC2/PI489777)SNP_02297 | 3192 | T | C | 15  | 3  | --     | --   |
| CakTC29370 | Ca(ICC2/PI489777)SNP_02298 | 860  | G | A | 63  | 40 | --     | --   |
|            | Ca(ICC2/PI489777)SNP_02299 | 1880 | G | A | 45  | 13 | --     | --   |
|            | Ca(ICC2/PI489777)SNP_02300 | 1933 | C | T | 67  | 50 | --     | --   |
|            | Ca(ICC2/PI489777)SNP_02301 | 1936 | T | C | 63  | 47 | --     | --   |
|            | Ca(ICC2/PI489777)SNP_02302 | 1990 | T | C | 81  | 62 | --     | --   |
| CakTC34802 | Ca(ICC2/PI489777)SNP_02303 | 301  | C | T | 25  | 3  | --     | --   |
| CakTC39657 | Ca(ICC2/PI489777)SNP_02304 | 200  | C | A | 5   | 4  | --     | --   |
|            | Ca(ICC2/PI489777)SNP_02305 | 243  | A | C | 6   | 4  | --     | --   |
|            | Ca(ICC2/PI489777)SNP_02306 | 936  | C | T | 6   | 4  | --     | --   |
| CakTC38188 | Ca(ICC2/PI489777)SNP_02307 | 1659 | A | G | 4   | 9  | --     | --   |
| CakTC38704 | Ca(ICC2/PI489777)SNP_02308 | 301  | A | C | 6   | 6  | --     | --   |
|            | Ca(ICC2/PI489777)SNP_02309 | 364  | T | C | 6   | 6  | --     | --   |
|            | Ca(ICC2/PI489777)SNP_02310 | 403  | A | T | 4   | 5  | --     | --   |
|            | Ca(ICC2/PI489777)SNP_02311 | 414  | C | A | 4   | 5  | --     | --   |
| CakTC24710 | Ca(ICC2/PI489777)SNP_02312 | 1297 | T | C | 117 | 20 | --     | bZIP |
|            | Ca(ICC2/PI489777)SNP_02313 | 1356 | G | A | 116 | 19 | --     | bZIP |
|            | Ca(ICC2/PI489777)SNP_02314 | 1357 | C | T | 115 | 19 | --     | bZIP |
|            | Ca(ICC2/PI489777)SNP_02315 | 1427 | A | G | 88  | 18 | --     | bZIP |
|            | Ca(ICC2/PI489777)SNP_02316 | 1675 | C | G | 110 | 14 | --     | bZIP |
|            | Ca(ICC2/PI489777)SNP_02317 | 2020 | T | C | 73  | 12 | --     | bZIP |
| CakTC41101 | Ca(ICC2/PI489777)SNP_02318 | 1214 | C | T | 31  | 15 | --     | --   |
|            | Ca(ICC2/PI489777)SNP_02319 | 1443 | C | T | 23  | 21 | --     | --   |
| CakTC36409 | Ca(ICC2/PI489777)SNP_02320 | 235  | A | T | 15  | 18 | --     | --   |
|            | Ca(ICC2/PI489777)SNP_02321 | 760  | C | G | 12  | 13 | --     | --   |
|            | Ca(ICC2/PI489777)SNP_02322 | 1348 | A | T | 17  | 5  | --     | --   |
|            | Ca(ICC2/PI489777)SNP_02323 | 1366 | G | A | 17  | 3  | --     | --   |
|            | Ca(ICC2/PI489777)SNP_02324 | 1432 | A | G | 16  | 3  | --     | --   |
|            | Ca(ICC2/PI489777)SNP_02325 | 1465 | T | C | 17  | 6  | --     | --   |
|            | Ca(ICC2/PI489777)SNP_02326 | 1794 | T | A | 21  | 4  | --     | --   |
| CakTC08909 | Ca(ICC2/PI489777)SNP_02327 | 1718 | T | C | 9   | 3  | --     | --   |
|            | Ca(ICC2/PI489777)SNP_02328 | 1722 | C | T | 9   | 3  | --     | --   |
|            | Ca(ICC2/PI489777)SNP_02329 | 1926 | G | A | 9   | 5  | --     | --   |
|            | Ca(ICC2/PI489777)SNP_02330 | 2039 | A | G | 8   | 3  | --     | --   |
| CakTC28229 | Ca(ICC2/PI489777)SNP_02331 | 816  | A | G | 15  | 3  | --     | --   |
|            | Ca(ICC2/PI489777)SNP_02332 | 848  | C | G | 15  | 5  | --     | --   |
|            | Ca(ICC2/PI489777)SNP_02333 | 912  | C | T | 10  | 5  | --     | --   |
|            | Ca(ICC2/PI489777)SNP_02334 | 2030 | C | T | 8   | 10 | --     | --   |
|            | Ca(ICC2/PI489777)SNP_02335 | 2436 | C | T | 7   | 6  | --     | --   |
| CakTC40210 | Ca(ICC2/PI489777)SNP_02336 | 766  | A | T | 12  | 3  | --     | HSF  |
|            | Ca(ICC2/PI489777)SNP_02337 | 831  | A | G | 12  | 5  | --     | HSF  |
|            | Ca(ICC2/PI489777)SNP_02338 | 1147 | C | T | 14  | 8  | --     | HSF  |
|            | Ca(ICC2/PI489777)SNP_02339 | 1369 | A | C | 16  | 5  | --     | HSF  |
| CakTC41160 | Ca(ICC2/PI489777)SNP_02340 | 1640 | T | A | 5   | 3  | --     | --   |
| CakTC24052 | Ca(ICC2/PI489777)SNP_02341 | 474  | G | T | 15  | 5  | Flower | bud  |
|            | Ca(ICC2/PI489777)SNP_02342 | 622  | G | T | 28  | 5  | Flower | bud  |
|            | Ca(ICC2/PI489777)SNP_02343 | 744  | A | C | 20  | 3  | Flower | bud  |
| CakTC28439 | Ca(ICC2/PI489777)SNP_02344 | 703  | C | A | 61  | 47 | --     | LOB  |
|            | Ca(ICC2/PI489777)SNP_02345 | 754  | A | T | 49  | 52 | --     | LOB  |
|            | Ca(ICC2/PI489777)SNP_02346 | 1029 | T | A | 42  | 30 | --     | LOB  |
|            | Ca(ICC2/PI489777)SNP_02347 | 1072 | C | G | 29  | 23 | --     | LOB  |
| CakTC10751 | Ca(ICC2/PI489777)SNP_02348 | 1289 | A | C | 5   | 15 | --     | --   |
| CakTC30924 | Ca(ICC2/PI489777)SNP_02349 | 704  | A | G | 11  | 3  | --     | --   |
|            | Ca(ICC2/PI489777)SNP_02350 | 1113 | G | A | 8   | 5  | --     | --   |
|            | Ca(ICC2/PI489777)SNP_02351 | 1172 | A | G | 4   | 5  | --     | --   |
|            | Ca(ICC2/PI489777)SNP_02352 | 1183 | C | T | 5   | 6  | --     | --   |
|            | Ca(ICC2/PI489777)SNP_02353 | 1316 | G | A | 4   | 6  | --     | --   |
|            | Ca(ICC2/PI489777)SNP_02354 | 1816 | T | C | 3   | 3  | --     | --   |
|            | Ca(ICC2/PI489777)SNP_02355 | 1858 | C | A | 3   | 4  | --     | --   |
| CakTC26857 | Ca(ICC2/PI489777)SNP_02356 | 545  | C | G | 17  | 5  | --     | --   |
|            | Ca(ICC2/PI489777)SNP_02357 | 2043 | C | G | 10  | 3  | --     | --   |
|            | Ca(ICC2/PI489777)SNP_02358 | 2133 | C | T | 12  | 4  | --     | --   |
| CakTC35850 | Ca(ICC2/PI489777)SNP_02359 | 164  | T | G | 5   | 7  | --     | MYB  |
|            | Ca(ICC2/PI489777)SNP_02360 | 379  | T | C | 6   | 13 | --     | MYB  |
|            | Ca(ICC2/PI489777)SNP_02361 | 2768 | G | T | 12  | 14 | --     | MYB  |
|            | Ca(ICC2/PI489777)SNP_02362 | 3178 | G | C | 20  | 4  | --     | MYB  |
| CakTC39794 | Ca(ICC2/PI489777)SNP_02363 | 676  | A | G | 11  | 10 | --     | --   |



|            |                             |      |   |   |     |    |           |      |
|------------|-----------------------------|------|---|---|-----|----|-----------|------|
|            | Ca(ICCV2/PI489777)SNP_02364 | 853  | G | A | 7   | 14 | --        | --   |
|            | Ca(ICCV2/PI489777)SNP_02365 | 1107 | A | G | 10  | 10 | --        | --   |
| CakTC22753 | Ca(ICCV2/PI489777)SNP_02366 | 187  | T | A | 112 | 61 | --        | --   |
|            | Ca(ICCV2/PI489777)SNP_02367 | 214  | A | G | 197 | 90 | --        | --   |
|            | Ca(ICCV2/PI489777)SNP_02368 | 358  | G | T | 212 | 94 | --        | --   |
| CakTC35261 | Ca(ICCV2/PI489777)SNP_02369 | 24   | A | G | 6   | 3  | --        | --   |
|            | Ca(ICCV2/PI489777)SNP_02370 | 1451 | C | T | 11  | 5  | --        | --   |
|            | Ca(ICCV2/PI489777)SNP_02371 | 1973 | C | T | 7   | 4  | --        | --   |
| CakTC28507 | Ca(ICCV2/PI489777)SNP_02372 | 83   | T | G | 8   | 4  | --        | --   |
|            | Ca(ICCV2/PI489777)SNP_02373 | 1713 | A | G | 28  | 22 | --        | --   |
| CakTC40563 | Ca(ICCV2/PI489777)SNP_02374 | 419  | T | A | 4   | 8  | --        | --   |
| CakTC27001 | Ca(ICCV2/PI489777)SNP_02375 | 638  | T | G | 28  | 11 | Young_pod | --   |
|            | Ca(ICCV2/PI489777)SNP_02376 | 656  | G | A | 26  | 12 | Young_pod | --   |
| CakTC37470 | Ca(ICCV2/PI489777)SNP_02377 | 78   | G | T | 14  | 9  | --        | bZIP |
|            | Ca(ICCV2/PI489777)SNP_02378 | 354  | G | C | 27  | 38 | --        | bZIP |
|            | Ca(ICCV2/PI489777)SNP_02379 | 378  | C | A | 25  | 29 | --        | bZIP |
|            | Ca(ICCV2/PI489777)SNP_02380 | 459  | T | C | 30  | 35 | --        | bZIP |
|            | Ca(ICCV2/PI489777)SNP_02381 | 968  | C | A | 17  | 18 | --        | bZIP |
| CakTC36534 | Ca(ICCV2/PI489777)SNP_02382 | 581  | T | C | 22  | 10 | --        | --   |
|            | Ca(ICCV2/PI489777)SNP_02383 | 2406 | A | G | 34  | 23 | --        | --   |
|            | Ca(ICCV2/PI489777)SNP_02384 | 2488 | A | C | 33  | 20 | --        | --   |
| CakTC41512 | Ca(ICCV2/PI489777)SNP_02385 | 276  | A | G | 12  | 4  | --        | --   |
|            | Ca(ICCV2/PI489777)SNP_02386 | 749  | G | A | 18  | 4  | --        | --   |
|            | Ca(ICCV2/PI489777)SNP_02387 | 1883 | A | G | 20  | 21 | --        | --   |
| CakTC30068 | Ca(ICCV2/PI489777)SNP_02388 | 1268 | A | G | 8   | 6  | --        | --   |
| CakTC36130 | Ca(ICCV2/PI489777)SNP_02389 | 260  | C | G | 17  | 9  | --        | --   |
|            | Ca(ICCV2/PI489777)SNP_02390 | 1537 | A | G | 48  | 18 | --        | --   |
|            | Ca(ICCV2/PI489777)SNP_02391 | 1675 | A | C | 46  | 19 | --        | --   |
|            | Ca(ICCV2/PI489777)SNP_02392 | 1927 | C | T | 20  | 24 | --        | --   |
|            | Ca(ICCV2/PI489777)SNP_02393 | 3045 | A | C | 16  | 23 | --        | --   |
|            | Ca(ICCV2/PI489777)SNP_02394 | 3568 | A | G | 26  | 20 | --        | --   |
|            | Ca(ICCV2/PI489777)SNP_02395 | 4792 | G | A | 8   | 8  | --        | --   |
|            | Ca(ICCV2/PI489777)SNP_02396 | 5017 | A | G | 12  | 14 | --        | --   |
|            | Ca(ICCV2/PI489777)SNP_02397 | 5401 | C | A | 7   | 5  | --        | --   |
| CakTC38868 | Ca(ICCV2/PI489777)SNP_02398 | 230  | C | T | 8   | 7  | --        | bHLH |
|            | Ca(ICCV2/PI489777)SNP_02399 | 685  | T | A | 9   | 3  | --        | bHLH |
| CakTC11393 | Ca(ICCV2/PI489777)SNP_02400 | 1507 | C | A | 7   | 7  | --        | --   |
|            | Ca(ICCV2/PI489777)SNP_02401 | 1562 | T | C | 7   | 8  | --        | --   |
| CakTC26074 | Ca(ICCV2/PI489777)SNP_02402 | 243  | G | C | 63  | 44 | --        | --   |
|            | Ca(ICCV2/PI489777)SNP_02403 | 570  | G | C | 61  | 53 | --        | --   |
| CakTC40003 | Ca(ICCV2/PI489777)SNP_02404 | 627  | T | C | 18  | 10 | --        | --   |
|            | Ca(ICCV2/PI489777)SNP_02405 | 765  | A | G | 15  | 7  | --        | --   |
| CakTC41097 | Ca(ICCV2/PI489777)SNP_02406 | 2312 | G | A | 11  | 5  | --        | --   |
| CakTC05829 | Ca(ICCV2/PI489777)SNP_02407 | 891  | G | T | 3   | 6  | --        | TAZ  |
|            | Ca(ICCV2/PI489777)SNP_02408 | 909  | T | G | 3   | 6  | --        | TAZ  |
| CakTC39353 | Ca(ICCV2/PI489777)SNP_02409 | 516  | T | C | 7   | 5  | --        | --   |
| CakTC34422 | Ca(ICCV2/PI489777)SNP_02410 | 55   | C | A | 7   | 7  | --        | GRAS |
|            | Ca(ICCV2/PI489777)SNP_02411 | 622  | T | G | 21  | 12 | --        | GRAS |
|            | Ca(ICCV2/PI489777)SNP_02412 | 756  | A | G | 24  | 17 | --        | GRAS |
|            | Ca(ICCV2/PI489777)SNP_02413 | 1632 | G | A | 23  | 23 | --        | GRAS |
|            | Ca(ICCV2/PI489777)SNP_02414 | 1659 | A | G | 22  | 18 | --        | GRAS |
| CakTC01025 | Ca(ICCV2/PI489777)SNP_02415 | 585  | C | A | 3   | 3  | Root      | --   |
|            | Ca(ICCV2/PI489777)SNP_02416 | 801  | G | A | 4   | 3  | Root      | --   |
|            | Ca(ICCV2/PI489777)SNP_02417 | 1086 | A | G | 8   | 9  | Root      | --   |
|            | Ca(ICCV2/PI489777)SNP_02418 | 1284 | T | C | 4   | 6  | Root      | --   |
|            | Ca(ICCV2/PI489777)SNP_02419 | 1458 | A | T | 12  | 6  | Root      | --   |
|            | Ca(ICCV2/PI489777)SNP_02420 | 1526 | C | T | 11  | 4  | Root      | --   |
|            | Ca(ICCV2/PI489777)SNP_02421 | 1704 | G | A | 9   | 4  | Root      | --   |
|            | Ca(ICCV2/PI489777)SNP_02422 | 2015 | C | T | 10  | 3  | Root      | --   |
|            | Ca(ICCV2/PI489777)SNP_02423 | 2466 | C | T | 8   | 3  | Root      | --   |
|            | Ca(ICCV2/PI489777)SNP_02424 | 2520 | C | T | 8   | 4  | Root      | --   |
|            | Ca(ICCV2/PI489777)SNP_02425 | 2547 | C | A | 8   | 3  | Root      | --   |
|            | Ca(ICCV2/PI489777)SNP_02426 | 3844 | G | A | 4   | 3  | Root      | --   |
|            | Ca(ICCV2/PI489777)SNP_02427 | 3942 | A | G | 6   | 3  | Root      | --   |
|            | Ca(ICCV2/PI489777)SNP_02428 | 3981 | C | T | 6   | 3  | Root      | --   |
|            | Ca(ICCV2/PI489777)SNP_02429 | 4029 | C | T | 6   | 4  | Root      | --   |
|            | Ca(ICCV2/PI489777)SNP_02430 | 4729 | C | T | 3   | 4  | Root      | --   |
| CakTC11468 | Ca(ICCV2/PI489777)SNP_02431 | 982  | T | C | 5   | 3  | --        | --   |
|            | Ca(ICCV2/PI489777)SNP_02432 | 1019 | A | G | 6   | 3  | --        | --   |
| CakTC11568 | Ca(ICCV2/PI489777)SNP_02433 | 106  | A | T | 31  | 5  | --        | --   |
| CakTC37258 | Ca(ICCV2/PI489777)SNP_02434 | 315  | C | T | 4   | 10 | --        | --   |
|            | Ca(ICCV2/PI489777)SNP_02435 | 317  | C | T | 4   | 10 | --        | --   |
|            | Ca(ICCV2/PI489777)SNP_02436 | 496  | A | G | 14  | 13 | --        | --   |
|            | Ca(ICCV2/PI489777)SNP_02437 | 538  | T | C | 18  | 14 | --        | --   |

|            |                             |      |   |   |    |    |    |    |
|------------|-----------------------------|------|---|---|----|----|----|----|
|            | Ca(ICCV2/PI489777)SNP_02438 | 691  | C | G | 17 | 16 | -- | -- |
| CakTC34359 | Ca(ICCV2/PI489777)SNP_02439 | 1831 | C | A | 24 | 4  | -- | -- |
|            | Ca(ICCV2/PI489777)SNP_02440 | 1881 | G | A | 34 | 11 | -- | -- |
| CakTC29164 | Ca(ICCV2/PI489777)SNP_02441 | 934  | G | A | 8  | 7  | -- | -- |
|            | Ca(ICCV2/PI489777)SNP_02442 | 1190 | C | G | 16 | 3  | -- | -- |
| CakTC24732 | Ca(ICCV2/PI489777)SNP_02443 | 1259 | T | C | 41 | 10 | -- | -- |
|            | Ca(ICCV2/PI489777)SNP_02444 | 1325 | C | T | 41 | 8  | -- | -- |
| CakTC24141 | Ca(ICCV2/PI489777)SNP_02445 | 154  | G | A | 28 | 24 | -- | -- |
| CakTC22282 | Ca(ICCV2/PI489777)SNP_02446 | 3796 | G | A | 5  | 3  | -- | -- |
| CakTC27408 | Ca(ICCV2/PI489777)SNP_02447 | 372  | T | G | 5  | 6  | -- | -- |
|            | Ca(ICCV2/PI489777)SNP_02448 | 1549 | A | G | 12 | 4  | -- | -- |
|            | Ca(ICCV2/PI489777)SNP_02449 | 2004 | A | G | 32 | 10 | -- | -- |
|            | Ca(ICCV2/PI489777)SNP_02450 | 2142 | T | G | 28 | 10 | -- | -- |
| CakTC31738 | Ca(ICCV2/PI489777)SNP_02451 | 1253 | C | T | 4  | 8  | -- | -- |
|            | Ca(ICCV2/PI489777)SNP_02452 | 1331 | G | A | 9  | 8  | -- | -- |
|            | Ca(ICCV2/PI489777)SNP_02453 | 1394 | G | C | 8  | 8  | -- | -- |
|            | Ca(ICCV2/PI489777)SNP_02454 | 1513 | G | A | 9  | 5  | -- | -- |
|            | Ca(ICCV2/PI489777)SNP_02455 | 1608 | A | C | 5  | 5  | -- | -- |
|            | Ca(ICCV2/PI489777)SNP_02456 | 2420 | T | C | 10 | 3  | -- | -- |
|            | Ca(ICCV2/PI489777)SNP_02457 | 2625 | A | G | 6  | 5  | -- | -- |
|            | Ca(ICCV2/PI489777)SNP_02458 | 2714 | C | G | 4  | 6  | -- | -- |
|            | Ca(ICCV2/PI489777)SNP_02459 | 2771 | T | A | 3  | 5  | -- | -- |
| CakTC28851 | Ca(ICCV2/PI489777)SNP_02460 | 445  | A | T | 4  | 3  | -- | -- |
|            | Ca(ICCV2/PI489777)SNP_02461 | 893  | G | C | 3  | 4  | -- | -- |
| CakTC24741 | Ca(ICCV2/PI489777)SNP_02462 | 614  | A | G | 30 | 17 | -- | -- |
|            | Ca(ICCV2/PI489777)SNP_02463 | 759  | T | C | 39 | 21 | -- | -- |
|            | Ca(ICCV2/PI489777)SNP_02464 | 901  | A | G | 52 | 19 | -- | -- |
|            | Ca(ICCV2/PI489777)SNP_02465 | 914  | G | A | 43 | 24 | -- | -- |
|            | Ca(ICCV2/PI489777)SNP_02466 | 1136 | G | T | 31 | 27 | -- | -- |
|            | Ca(ICCV2/PI489777)SNP_02467 | 1175 | G | C | 30 | 26 | -- | -- |
| CakTC37967 | Ca(ICCV2/PI489777)SNP_02468 | 36   | T | C | 6  | 12 | -- | -- |
|            | Ca(ICCV2/PI489777)SNP_02469 | 697  | G | A | 12 | 25 | -- | -- |
|            | Ca(ICCV2/PI489777)SNP_02470 | 808  | A | T | 13 | 16 | -- | -- |
|            | Ca(ICCV2/PI489777)SNP_02471 | 952  | T | C | 36 | 34 | -- | -- |
|            | Ca(ICCV2/PI489777)SNP_02472 | 1052 | G | A | 37 | 31 | -- | -- |
|            | Ca(ICCV2/PI489777)SNP_02473 | 1297 | G | T | 36 | 23 | -- | -- |
|            | Ca(ICCV2/PI489777)SNP_02474 | 1462 | C | G | 7  | 3  | -- | -- |
| CakTC29823 | Ca(ICCV2/PI489777)SNP_02475 | 1535 | C | T | 4  | 3  | -- | -- |
| CakTC41383 | Ca(ICCV2/PI489777)SNP_02476 | 463  | T | C | 16 | 3  | -- | -- |
|            | Ca(ICCV2/PI489777)SNP_02477 | 1689 | C | T | 3  | 3  | -- | -- |
| CakTC33716 | Ca(ICCV2/PI489777)SNP_02478 | 160  | G | T | 6  | 4  | -- | -- |
| CakTC38805 | Ca(ICCV2/PI489777)SNP_02479 | 1108 | T | A | 12 | 7  | -- | -- |
| CakTC40807 | Ca(ICCV2/PI489777)SNP_02480 | 82   | A | G | 5  | 5  | -- | -- |
|            | Ca(ICCV2/PI489777)SNP_02481 | 83   | T | A | 5  | 5  | -- | -- |
|            | Ca(ICCV2/PI489777)SNP_02482 | 1900 | T | A | 5  | 4  | -- | -- |
| CakTC32223 | Ca(ICCV2/PI489777)SNP_02483 | 508  | A | G | 3  | 5  | -- | -- |
|            | Ca(ICCV2/PI489777)SNP_02484 | 784  | T | A | 7  | 5  | -- | -- |
| CakTC29110 | Ca(ICCV2/PI489777)SNP_02485 | 281  | C | T | 27 | 32 | -- | -- |
|            | Ca(ICCV2/PI489777)SNP_02486 | 560  | C | T | 22 | 21 | -- | -- |
|            | Ca(ICCV2/PI489777)SNP_02487 | 651  | A | G | 24 | 12 | -- | -- |
|            | Ca(ICCV2/PI489777)SNP_02488 | 704  | C | A | 13 | 9  | -- | -- |
|            | Ca(ICCV2/PI489777)SNP_02489 | 713  | C | A | 14 | 7  | -- | -- |
| CakTC27782 | Ca(ICCV2/PI489777)SNP_02490 | 202  | A | G | 3  | 4  | -- | -- |
|            | Ca(ICCV2/PI489777)SNP_02491 | 996  | A | G | 5  | 8  | -- | -- |
|            | Ca(ICCV2/PI489777)SNP_02492 | 2482 | T | C | 5  | 6  | -- | -- |
|            | Ca(ICCV2/PI489777)SNP_02493 | 2593 | G | A | 14 | 4  | -- | -- |
|            | Ca(ICCV2/PI489777)SNP_02494 | 2658 | C | T | 11 | 6  | -- | -- |
|            | Ca(ICCV2/PI489777)SNP_02495 | 2854 | G | A | 11 | 5  | -- | -- |
| CakTC37540 | Ca(ICCV2/PI489777)SNP_02496 | 45   | A | G | 3  | 5  | -- | -- |
|            | Ca(ICCV2/PI489777)SNP_02497 | 207  | T | C | 10 | 8  | -- | -- |
|            | Ca(ICCV2/PI489777)SNP_02498 | 625  | A | T | 12 | 8  | -- | -- |
|            | Ca(ICCV2/PI489777)SNP_02499 | 639  | C | T | 13 | 8  | -- | -- |
|            | Ca(ICCV2/PI489777)SNP_02500 | 642  | C | A | 13 | 8  | -- | -- |
|            | Ca(ICCV2/PI489777)SNP_02501 | 668  | G | C | 13 | 7  | -- | -- |
|            | Ca(ICCV2/PI489777)SNP_02502 | 708  | G | A | 14 | 7  | -- | -- |
| CakTC29934 | Ca(ICCV2/PI489777)SNP_02503 | 651  | A | T | 32 | 6  | -- | -- |
|            | Ca(ICCV2/PI489777)SNP_02504 | 720  | A | T | 35 | 5  | -- | -- |
|            | Ca(ICCV2/PI489777)SNP_02505 | 942  | A | G | 25 | 5  | -- | -- |
|            | Ca(ICCV2/PI489777)SNP_02506 | 1128 | A | T | 28 | 8  | -- | -- |
|            | Ca(ICCV2/PI489777)SNP_02507 | 1557 | G | A | 12 | 4  | -- | -- |
| CakTC26344 | Ca(ICCV2/PI489777)SNP_02508 | 328  | T | C | 35 | 20 | -- | -- |
|            | Ca(ICCV2/PI489777)SNP_02509 | 479  | T | C | 46 | 31 | -- | -- |
|            | Ca(ICCV2/PI489777)SNP_02510 | 1221 | A | G | 19 | 16 | -- | -- |
| CakTC42967 | Ca(ICCV2/PI489777)SNP_02511 | 1070 | G | A | 8  | 7  | -- | -- |

|            |                            |      |   |   |     |     |           |     |
|------------|----------------------------|------|---|---|-----|-----|-----------|-----|
| CakTC24123 | Ca(ICC2/PI489777)SNP_02512 | 635  | C | T | 6   | 5   | --        | --  |
|            | Ca(ICC2/PI489777)SNP_02513 | 676  | A | G | 6   | 5   | --        | --  |
|            | Ca(ICC2/PI489777)SNP_02514 | 749  | A | G | 6   | 7   | --        | --  |
| CakTC33696 | Ca(ICC2/PI489777)SNP_02515 | 493  | G | T | 31  | 19  | --        | --  |
|            | Ca(ICC2/PI489777)SNP_02516 | 690  | T | C | 27  | 24  | --        | --  |
|            | Ca(ICC2/PI489777)SNP_02517 | 735  | G | A | 19  | 18  | --        | --  |
|            | Ca(ICC2/PI489777)SNP_02518 | 852  | T | C | 24  | 15  | --        | --  |
|            | Ca(ICC2/PI489777)SNP_02519 | 864  | T | C | 26  | 14  | --        | --  |
|            | Ca(ICC2/PI489777)SNP_02520 | 1992 | G | T | 7   | 17  | --        | --  |
| CakTC40846 | Ca(ICC2/PI489777)SNP_02521 | 315  | T | A | 6   | 5   | --        | --  |
| CakTC26309 | Ca(ICC2/PI489777)SNP_02522 | 1027 | G | A | 22  | 8   | --        | --  |
|            | Ca(ICC2/PI489777)SNP_02523 | 1300 | T | C | 19  | 6   | --        | --  |
| CakTC09674 | Ca(ICC2/PI489777)SNP_02524 | 585  | T | C | 7   | 3   | --        | --  |
|            | Ca(ICC2/PI489777)SNP_02525 | 1784 | C | T | 10  | 4   | --        | --  |
|            | Ca(ICC2/PI489777)SNP_02526 | 2181 | G | A | 33  | 15  | --        | --  |
|            | Ca(ICC2/PI489777)SNP_02527 | 2283 | A | G | 24  | 12  | --        | --  |
|            | Ca(ICC2/PI489777)SNP_02528 | 2446 | T | C | 17  | 5   | --        | --  |
| CakTC39284 | Ca(ICC2/PI489777)SNP_02529 | 1000 | C | T | 17  | 12  | --        | --  |
|            | Ca(ICC2/PI489777)SNP_02530 | 1198 | C | A | 23  | 15  | --        | --  |
|            | Ca(ICC2/PI489777)SNP_02531 | 1330 | T | A | 17  | 11  | --        | --  |
|            | Ca(ICC2/PI489777)SNP_02532 | 1345 | A | G | 18  | 11  | --        | --  |
|            | Ca(ICC2/PI489777)SNP_02533 | 1598 | T | G | 28  | 6   | --        | --  |
|            | Ca(ICC2/PI489777)SNP_02534 | 1606 | A | T | 28  | 6   | --        | --  |
| CakTC41422 | Ca(ICC2/PI489777)SNP_02535 | 1389 | C | T | 10  | 14  | --        | --  |
|            | Ca(ICC2/PI489777)SNP_02536 | 1390 | C | G | 11  | 14  | --        | --  |
|            | Ca(ICC2/PI489777)SNP_02537 | 1701 | G | C | 15  | 13  | --        | --  |
| CakTC33720 | Ca(ICC2/PI489777)SNP_02538 | 1223 | T | C | 11  | 7   | --        | --  |
|            | Ca(ICC2/PI489777)SNP_02539 | 5214 | A | G | 16  | 6   | --        | --  |
|            | Ca(ICC2/PI489777)SNP_02540 | 5406 | A | G | 9   | 5   | --        | --  |
|            | Ca(ICC2/PI489777)SNP_02541 | 5456 | G | A | 9   | 5   | --        | --  |
|            | Ca(ICC2/PI489777)SNP_02542 | 6395 | G | A | 5   | 4   | --        | --  |
|            | Ca(ICC2/PI489777)SNP_02543 | 6524 | C | G | 5   | 3   | --        | --  |
| CakTC25271 | Ca(ICC2/PI489777)SNP_02544 | 412  | T | A | 8   | 5   | --        | BSD |
| CakTC23072 | Ca(ICC2/PI489777)SNP_02545 | 1349 | T | G | 117 | 111 | --        | --  |
|            | Ca(ICC2/PI489777)SNP_02546 | 1940 | G | T | 5   | 5   | --        | --  |
|            | Ca(ICC2/PI489777)SNP_02547 | 2729 | C | T | 3   | 9   | --        | --  |
|            | Ca(ICC2/PI489777)SNP_02548 | 2837 | T | A | 4   | 10  | --        | --  |
|            | Ca(ICC2/PI489777)SNP_02549 | 2960 | G | A | 6   | 7   | --        | --  |
|            | Ca(ICC2/PI489777)SNP_02550 | 2972 | C | G | 6   | 6   | --        | --  |
|            | Ca(ICC2/PI489777)SNP_02551 | 2983 | G | T | 6   | 6   | --        | --  |
|            | Ca(ICC2/PI489777)SNP_02552 | 3203 | A | T | 3   | 4   | --        | --  |
| CakTC37940 | Ca(ICC2/PI489777)SNP_02553 | 994  | A | T | 3   | 3   | --        | --  |
| CakTC35826 | Ca(ICC2/PI489777)SNP_02554 | 298  | T | G | 3   | 8   | --        | --  |
| CakTC24888 | Ca(ICC2/PI489777)SNP_02555 | 49   | A | G | 9   | 3   | Young_pod | --  |
| CakTC22381 | Ca(ICC2/PI489777)SNP_02556 | 286  | T | G | 3   | 14  | --        | --  |
| CakTC11455 | Ca(ICC2/PI489777)SNP_02557 | 747  | C | T | 15  | 7   | --        | --  |
|            | Ca(ICC2/PI489777)SNP_02558 | 906  | C | T | 18  | 10  | --        | --  |
|            | Ca(ICC2/PI489777)SNP_02559 | 1014 | A | G | 17  | 12  | --        | --  |
|            | Ca(ICC2/PI489777)SNP_02560 | 1116 | G | A | 19  | 12  | --        | --  |
|            | Ca(ICC2/PI489777)SNP_02561 | 1404 | G | C | 17  | 13  | --        | --  |
| CakTC23823 | Ca(ICC2/PI489777)SNP_02562 | 735  | C | A | 9   | 7   | --        | --  |
|            | Ca(ICC2/PI489777)SNP_02563 | 2604 | T | C | 19  | 6   | --        | --  |
|            | Ca(ICC2/PI489777)SNP_02564 | 2762 | A | C | 14  | 3   | --        | --  |
| CakTC22637 | Ca(ICC2/PI489777)SNP_02565 | 334  | T | A | 4   | 3   | --        | --  |
| CakTC00553 | Ca(ICC2/PI489777)SNP_02566 | 451  | A | G | 21  | 5   | --        | --  |
|            | Ca(ICC2/PI489777)SNP_02567 | 565  | G | A | 24  | 7   | --        | --  |
|            | Ca(ICC2/PI489777)SNP_02568 | 673  | A | G | 26  | 8   | --        | --  |
| CakTC42702 | Ca(ICC2/PI489777)SNP_02569 | 155  | G | C | 3   | 15  | --        | --  |
|            | Ca(ICC2/PI489777)SNP_02570 | 407  | C | T | 7   | 21  | --        | --  |
|            | Ca(ICC2/PI489777)SNP_02571 | 1667 | G | C | 9   | 11  | --        | --  |
| CakTC31897 | Ca(ICC2/PI489777)SNP_02572 | 2471 | A | T | 11  | 4   | --        | --  |
|            | Ca(ICC2/PI489777)SNP_02573 | 3727 | G | A | 8   | 7   | --        | --  |
|            | Ca(ICC2/PI489777)SNP_02574 | 3755 | C | G | 8   | 7   | --        | --  |
|            | Ca(ICC2/PI489777)SNP_02575 | 4154 | T | C | 6   | 6   | --        | --  |
|            | Ca(ICC2/PI489777)SNP_02576 | 5061 | G | A | 12  | 8   | --        | --  |
|            | Ca(ICC2/PI489777)SNP_02577 | 5088 | G | A | 14  | 8   | --        | --  |
|            | Ca(ICC2/PI489777)SNP_02578 | 5226 | G | A | 17  | 8   | --        | --  |
|            | Ca(ICC2/PI489777)SNP_02579 | 6646 | C | T | 7   | 5   | --        | --  |
|            | Ca(ICC2/PI489777)SNP_02580 | 6906 | T | A | 15  | 8   | --        | --  |
|            | Ca(ICC2/PI489777)SNP_02581 | 6966 | A | G | 17  | 11  | --        | --  |
|            | Ca(ICC2/PI489777)SNP_02582 | 7077 | C | A | 18  | 10  | --        | --  |
|            | Ca(ICC2/PI489777)SNP_02583 | 7086 | C | T | 18  | 12  | --        | --  |
|            | Ca(ICC2/PI489777)SNP_02584 | 7134 | A | G | 15  | 11  | --        | --  |
|            | Ca(ICC2/PI489777)SNP_02585 | 7143 | T | C | 15  | 10  | --        | --  |

|            |                            |      |   |   |     |    |        |     |
|------------|----------------------------|------|---|---|-----|----|--------|-----|
| CakTC10130 | Ca(ICC2/PI489777)SNP_02586 | 26   | T | C | 6   | 10 | --     | --  |
|            | Ca(ICC2/PI489777)SNP_02587 | 212  | G | A | 10  | 18 | --     | --  |
| CakTC32261 | Ca(ICC2/PI489777)SNP_02588 | 1100 | C | T | 6   | 4  | --     | --  |
|            | Ca(ICC2/PI489777)SNP_02589 | 1169 | G | A | 6   | 5  | --     | --  |
|            | Ca(ICC2/PI489777)SNP_02590 | 1289 | C | T | 6   | 5  | --     | --  |
| CakTC23080 | Ca(ICC2/PI489777)SNP_02591 | 105  | C | G | 10  | 4  | --     | --  |
|            | Ca(ICC2/PI489777)SNP_02592 | 107  | G | T | 9   | 4  | --     | --  |
| CakTC39064 | Ca(ICC2/PI489777)SNP_02593 | 1082 | C | T | 9   | 9  | --     | --  |
|            | Ca(ICC2/PI489777)SNP_02594 | 1121 | T | C | 10  | 7  | --     | --  |
|            | Ca(ICC2/PI489777)SNP_02595 | 1301 | T | A | 4   | 3  | --     | --  |
| CakTC38255 | Ca(ICC2/PI489777)SNP_02596 | 360  | G | C | 13  | 10 | --     | --  |
|            | Ca(ICC2/PI489777)SNP_02597 | 535  | T | C | 8   | 11 | --     | --  |
| CakTC27396 | Ca(ICC2/PI489777)SNP_02598 | 1113 | G | A | 8   | 5  | --     | --  |
| CakTC23467 | Ca(ICC2/PI489777)SNP_02599 | 1205 | C | T | 14  | 11 | --     | --  |
|            | Ca(ICC2/PI489777)SNP_02600 | 1601 | G | A | 34  | 11 | --     | --  |
| CakTC24784 | Ca(ICC2/PI489777)SNP_02601 | 282  | G | A | 4   | 4  | Flower | bud |
|            | Ca(ICC2/PI489777)SNP_02602 | 391  | A | G | 5   | 4  | Flower | bud |
|            | Ca(ICC2/PI489777)SNP_02603 | 468  | C | T | 4   | 3  | Flower | bud |
|            | Ca(ICC2/PI489777)SNP_02604 | 896  | G | A | 10  | 3  | Flower | bud |
|            | Ca(ICC2/PI489777)SNP_02605 | 908  | T | G | 10  | 3  | Flower | bud |
|            | Ca(ICC2/PI489777)SNP_02606 | 916  | C | T | 11  | 3  | Flower | bud |
| CakTC09768 | Ca(ICC2/PI489777)SNP_02607 | 104  | A | C | 12  | 14 | --     | --  |
|            | Ca(ICC2/PI489777)SNP_02608 | 305  | A | T | 24  | 14 | --     | --  |
| CakTC33291 | Ca(ICC2/PI489777)SNP_02609 | 363  | T | A | 11  | 4  | --     | --  |
|            | Ca(ICC2/PI489777)SNP_02610 | 1478 | T | C | 6   | 9  | --     | --  |
|            | Ca(ICC2/PI489777)SNP_02611 | 1722 | T | G | 6   | 4  | --     | --  |
|            | Ca(ICC2/PI489777)SNP_02612 | 1732 | G | A | 7   | 4  | --     | --  |
|            | Ca(ICC2/PI489777)SNP_02613 | 1737 | G | C | 7   | 4  | --     | --  |
|            | Ca(ICC2/PI489777)SNP_02614 | 2580 | T | C | 8   | 3  | --     | --  |
|            | Ca(ICC2/PI489777)SNP_02615 | 2594 | A | G | 7   | 3  | --     | --  |
|            | Ca(ICC2/PI489777)SNP_02616 | 2741 | A | G | 4   | 3  | --     | --  |
|            | Ca(ICC2/PI489777)SNP_02617 | 4620 | T | C | 3   | 3  | --     | --  |
| CakTC36016 | Ca(ICC2/PI489777)SNP_02618 | 139  | A | T | 30  | 18 | --     | --  |
|            | Ca(ICC2/PI489777)SNP_02619 | 923  | A | G | 51  | 43 | --     | --  |
|            | Ca(ICC2/PI489777)SNP_02620 | 941  | G | A | 49  | 41 | --     | --  |
|            | Ca(ICC2/PI489777)SNP_02621 | 1175 | C | T | 88  | 45 | --     | --  |
|            | Ca(ICC2/PI489777)SNP_02622 | 1400 | G | A | 76  | 34 | --     | --  |
|            | Ca(ICC2/PI489777)SNP_02623 | 1907 | T | C | 55  | 34 | --     | --  |
| CakTC42310 | Ca(ICC2/PI489777)SNP_02624 | 280  | C | T | 6   | 6  | --     | --  |
|            | Ca(ICC2/PI489777)SNP_02625 | 1265 | T | C | 14  | 5  | --     | --  |
| CakTC22590 | Ca(ICC2/PI489777)SNP_02626 | 5150 | T | C | 20  | 12 | --     | --  |
|            | Ca(ICC2/PI489777)SNP_02627 | 5286 | A | G | 13  | 9  | --     | --  |
| CakTC42293 | Ca(ICC2/PI489777)SNP_02628 | 544  | G | A | 12  | 4  | --     | --  |
|            | Ca(ICC2/PI489777)SNP_02629 | 545  | T | A | 13  | 4  | --     | --  |
|            | Ca(ICC2/PI489777)SNP_02630 | 610  | A | T | 15  | 5  | --     | --  |
|            | Ca(ICC2/PI489777)SNP_02631 | 697  | T | A | 13  | 5  | --     | --  |
|            | Ca(ICC2/PI489777)SNP_02632 | 714  | G | C | 18  | 5  | --     | --  |
|            | Ca(ICC2/PI489777)SNP_02633 | 726  | A | G | 13  | 5  | --     | --  |
| CakTC30085 | Ca(ICC2/PI489777)SNP_02634 | 529  | A | G | 10  | 3  | --     | --  |
| CakTC08106 | Ca(ICC2/PI489777)SNP_02635 | 816  | G | A | 57  | 44 | --     | --  |
| CakTC11228 | Ca(ICC2/PI489777)SNP_02636 | 241  | A | G | 20  | 4  | --     | --  |
|            | Ca(ICC2/PI489777)SNP_02637 | 734  | G | T | 16  | 7  | --     | --  |
| CakTC41341 | Ca(ICC2/PI489777)SNP_02638 | 563  | C | T | 5   | 3  | --     | --  |
|            | Ca(ICC2/PI489777)SNP_02639 | 566  | G | T | 5   | 3  | --     | --  |
|            | Ca(ICC2/PI489777)SNP_02640 | 575  | C | T | 5   | 3  | --     | --  |
|            | Ca(ICC2/PI489777)SNP_02641 | 1371 | A | G | 10  | 5  | --     | --  |
| CakTC31929 | Ca(ICC2/PI489777)SNP_02642 | 418  | C | A | 26  | 8  | --     | --  |
|            | Ca(ICC2/PI489777)SNP_02643 | 899  | A | G | 17  | 3  | --     | --  |
|            | Ca(ICC2/PI489777)SNP_02644 | 1024 | A | G | 18  | 4  | --     | --  |
| CakTC39411 | Ca(ICC2/PI489777)SNP_02645 | 189  | G | A | 8   | 3  | --     | --  |
|            | Ca(ICC2/PI489777)SNP_02646 | 255  | A | G | 8   | 3  | --     | --  |
| CakTC24834 | Ca(ICC2/PI489777)SNP_02647 | 513  | A | T | 9   | 9  | --     | --  |
|            | Ca(ICC2/PI489777)SNP_02648 | 524  | A | G | 8   | 7  | --     | --  |
|            | Ca(ICC2/PI489777)SNP_02649 | 568  | C | T | 12  | 10 | --     | --  |
|            | Ca(ICC2/PI489777)SNP_02650 | 1738 | T | A | 14  | 4  | --     | --  |
| CakTC27406 | Ca(ICC2/PI489777)SNP_02651 | 1137 | T | G | 27  | 7  | --     | --  |
|            | Ca(ICC2/PI489777)SNP_02652 | 1170 | G | A | 21  | 6  | --     | --  |
| CakTC42880 | Ca(ICC2/PI489777)SNP_02653 | 503  | C | T | 78  | 38 | --     | --  |
|            | Ca(ICC2/PI489777)SNP_02654 | 593  | G | T | 76  | 38 | --     | --  |
|            | Ca(ICC2/PI489777)SNP_02655 | 692  | A | C | 95  | 39 | --     | --  |
|            | Ca(ICC2/PI489777)SNP_02656 | 950  | G | A | 127 | 38 | --     | --  |
|            | Ca(ICC2/PI489777)SNP_02657 | 1115 | G | C | 113 | 47 | --     | --  |
|            | Ca(ICC2/PI489777)SNP_02658 | 1392 | C | T | 107 | 43 | --     | --  |
|            | Ca(ICC2/PI489777)SNP_02659 | 1743 | G | A | 39  | 11 | --     | --  |

|            |                            |      |   |   |    |    |           |            |
|------------|----------------------------|------|---|---|----|----|-----------|------------|
|            | Ca(ICC2/PI489777)SNP_02660 | 1757 | C | T | 40 | 8  | --        | --         |
| CakTC38100 | Ca(ICC2/PI489777)SNP_02661 | 855  | A | C | 9  | 5  | --        | Alfin-like |
| CakTC30740 | Ca(ICC2/PI489777)SNP_02662 | 1196 | G | A | 15 | 5  | --        | --         |
|            | Ca(ICC2/PI489777)SNP_02663 | 1349 | C | T | 16 | 6  | --        | --         |
|            | Ca(ICC2/PI489777)SNP_02664 | 1367 | A | C | 16 | 4  | --        | --         |
|            | Ca(ICC2/PI489777)SNP_02665 | 1370 | A | G | 19 | 4  | --        | --         |
| CakTC42482 | Ca(ICC2/PI489777)SNP_02666 | 584  | A | G | 9  | 4  | --        | --         |
| CakTC27850 | Ca(ICC2/PI489777)SNP_02667 | 1079 | T | C | 13 | 7  | --        | --         |
| CakTC42343 | Ca(ICC2/PI489777)SNP_02668 | 252  | A | T | 20 | 5  | --        | --         |
| CakTC33462 | Ca(ICC2/PI489777)SNP_02669 | 232  | A | G | 8  | 4  | --        | --         |
|            | Ca(ICC2/PI489777)SNP_02670 | 1674 | A | G | 10 | 14 | --        | --         |
| CakTC02543 | Ca(ICC2/PI489777)SNP_02671 | 976  | C | T | 3  | 8  | --        | --         |
| CakTC31389 | Ca(ICC2/PI489777)SNP_02672 | 703  | A | G | 3  | 3  | --        | --         |
| CakTC24584 | Ca(ICC2/PI489777)SNP_02673 | 177  | G | A | 26 | 19 | --        | NAC        |
|            | Ca(ICC2/PI489777)SNP_02674 | 208  | G | A | 23 | 17 | --        | NAC        |
|            | Ca(ICC2/PI489777)SNP_02675 | 228  | C | T | 25 | 20 | --        | NAC        |
|            | Ca(ICC2/PI489777)SNP_02676 | 327  | C | T | 26 | 26 | --        | NAC        |
|            | Ca(ICC2/PI489777)SNP_02677 | 525  | A | G | 51 | 28 | --        | NAC        |
| CakTC35952 | Ca(ICC2/PI489777)SNP_02678 | 286  | C | T | 13 | 5  | --        | --         |
|            | Ca(ICC2/PI489777)SNP_02679 | 471  | C | A | 21 | 16 | --        | --         |
|            | Ca(ICC2/PI489777)SNP_02680 | 636  | A | G | 25 | 15 | --        | --         |
| CakTC09370 | Ca(ICC2/PI489777)SNP_02681 | 337  | G | A | 3  | 3  | --        | --         |
| CakTC40053 | Ca(ICC2/PI489777)SNP_02682 | 817  | A | G | 68 | 13 | --        | --         |
|            | Ca(ICC2/PI489777)SNP_02683 | 978  | A | G | 52 | 4  | --        | --         |
| CakTC10384 | Ca(ICC2/PI489777)SNP_02684 | 1333 | G | T | 8  | 5  | --        | --         |
|            | Ca(ICC2/PI489777)SNP_02685 | 1431 | T | G | 11 | 14 | --        | --         |
|            | Ca(ICC2/PI489777)SNP_02686 | 1492 | A | C | 9  | 13 | --        | --         |
|            | Ca(ICC2/PI489777)SNP_02687 | 1549 | T | G | 7  | 13 | --        | --         |
|            | Ca(ICC2/PI489777)SNP_02688 | 1731 | C | G | 8  | 13 | --        | --         |
|            | Ca(ICC2/PI489777)SNP_02689 | 1753 | G | A | 8  | 13 | --        | --         |
|            | Ca(ICC2/PI489777)SNP_02690 | 1765 | G | A | 8  | 9  | --        | --         |
| CakTC35038 | Ca(ICC2/PI489777)SNP_02691 | 127  | A | C | 21 | 3  | Mature    | Leaf       |
|            | Ca(ICC2/PI489777)SNP_02692 | 151  | C | G | 18 | 3  | Mature    | Leaf       |
| CakTC24312 | Ca(ICC2/PI489777)SNP_02693 | 94   | C | T | 12 | 3  | Young_pod | --         |
|            | Ca(ICC2/PI489777)SNP_02694 | 365  | C | A | 27 | 9  | Young_pod | --         |
| CakTC32671 | Ca(ICC2/PI489777)SNP_02695 | 1867 | A | T | 18 | 12 | Root      | --         |
|            | Ca(ICC2/PI489777)SNP_02696 | 2011 | C | T | 18 | 9  | Root      | --         |
|            | Ca(ICC2/PI489777)SNP_02697 | 2110 | G | A | 9  | 3  | Root      | --         |
|            | Ca(ICC2/PI489777)SNP_02698 | 2592 | T | C | 20 | 10 | Root      | --         |
|            | Ca(ICC2/PI489777)SNP_02699 | 2664 | C | T | 23 | 13 | Root      | --         |
| CakTC37308 | Ca(ICC2/PI489777)SNP_02700 | 354  | A | C | 25 | 11 | --        | --         |
|            | Ca(ICC2/PI489777)SNP_02701 | 552  | C | T | 27 | 12 | --        | --         |
|            | Ca(ICC2/PI489777)SNP_02702 | 990  | A | G | 22 | 10 | --        | --         |
|            | Ca(ICC2/PI489777)SNP_02703 | 1138 | C | T | 16 | 13 | --        | --         |
| CakTC25047 | Ca(ICC2/PI489777)SNP_02704 | 742  | G | T | 30 | 16 | --        | --         |
| CakTC03955 | Ca(ICC2/PI489777)SNP_02705 | 2167 | G | A | 4  | 4  | --        | --         |
| CakTC38341 | Ca(ICC2/PI489777)SNP_02706 | 535  | C | T | 7  | 3  | --        | --         |
| CakTC41736 | Ca(ICC2/PI489777)SNP_02707 | 267  | A | T | 12 | 7  | --        | C2C2-YABBY |
|            | Ca(ICC2/PI489777)SNP_02708 | 534  | C | T | 6  | 3  | --        | C2C2-YABBY |
| CakTC41865 | Ca(ICC2/PI489777)SNP_02709 | 356  | T | C | 16 | 4  | --        | CCAAT      |
|            | Ca(ICC2/PI489777)SNP_02710 | 773  | C | G | 4  | 3  | --        | CCAAT      |
| CakTC28815 | Ca(ICC2/PI489777)SNP_02711 | 399  | T | G | 18 | 9  | --        | --         |
| CakTC27916 | Ca(ICC2/PI489777)SNP_02712 | 552  | A | C | 78 | 30 | --        | --         |
| CakTC26907 | Ca(ICC2/PI489777)SNP_02713 | 438  | C | T | 7  | 7  | --        | --         |
| CakTC29928 | Ca(ICC2/PI489777)SNP_02714 | 671  | A | C | 26 | 8  | --        | --         |
|            | Ca(ICC2/PI489777)SNP_02715 | 849  | C | T | 28 | 9  | --        | --         |
|            | Ca(ICC2/PI489777)SNP_02716 | 1407 | A | G | 10 | 12 | --        | --         |
| CakTC33340 | Ca(ICC2/PI489777)SNP_02717 | 320  | A | C | 50 | 55 | --        | --         |
| CakTC23141 | Ca(ICC2/PI489777)SNP_02718 | 1854 | T | G | 5  | 3  | --        | --         |
| CakTC37796 | Ca(ICC2/PI489777)SNP_02719 | 306  | A | T | 4  | 4  | --        | G2-like    |
|            | Ca(ICC2/PI489777)SNP_02720 | 567  | G | C | 7  | 4  | --        | G2-like    |
| CakTC42264 | Ca(ICC2/PI489777)SNP_02721 | 798  | C | G | 15 | 12 | --        | --         |
|            | Ca(ICC2/PI489777)SNP_02722 | 861  | A | G | 16 | 11 | --        | --         |
|            | Ca(ICC2/PI489777)SNP_02723 | 939  | A | G | 19 | 12 | --        | --         |
|            | Ca(ICC2/PI489777)SNP_02724 | 1020 | C | T | 22 | 12 | --        | --         |
|            | Ca(ICC2/PI489777)SNP_02725 | 1042 | A | G | 22 | 11 | --        | --         |
|            | Ca(ICC2/PI489777)SNP_02726 | 1697 | A | G | 6  | 7  | --        | --         |
| CakTC41824 | Ca(ICC2/PI489777)SNP_02727 | 920  | G | C | 31 | 7  | --        | --         |
| CakTC36771 | Ca(ICC2/PI489777)SNP_02728 | 592  | C | A | 17 | 3  | --        | --         |
|            | Ca(ICC2/PI489777)SNP_02729 | 838  | C | T | 19 | 6  | --        | --         |
|            | Ca(ICC2/PI489777)SNP_02730 | 1057 | G | A | 19 | 11 | --        | --         |
|            | Ca(ICC2/PI489777)SNP_02731 | 1513 | A | C | 17 | 6  | --        | --         |
|            | Ca(ICC2/PI489777)SNP_02732 | 1742 | G | T | 26 | 11 | --        | --         |
|            | Ca(ICC2/PI489777)SNP_02733 | 1865 | T | C | 22 | 7  | --        | --         |

|            |                            |      |   |   |    |     |    |    |
|------------|----------------------------|------|---|---|----|-----|----|----|
|            | Ca(ICC2/PI489777)SNP_02734 | 2637 | C | T | 37 | 5   | -- | -- |
|            | Ca(ICC2/PI489777)SNP_02735 | 2931 | G | A | 27 | 6   | -- | -- |
|            | Ca(ICC2/PI489777)SNP_02736 | 3247 | C | T | 16 | 3   | -- | -- |
|            | Ca(ICC2/PI489777)SNP_02737 | 3565 | A | G | 14 | 6   | -- | -- |
|            | Ca(ICC2/PI489777)SNP_02738 | 3938 | C | T | 4  | 3   | -- | -- |
| CakTC23575 | Ca(ICC2/PI489777)SNP_02739 | 84   | G | A | 7  | 8   | -- | -- |
|            | Ca(ICC2/PI489777)SNP_02740 | 1033 | A | G | 8  | 7   | -- | -- |
| CakTC40177 | Ca(ICC2/PI489777)SNP_02741 | 442  | T | C | 9  | 8   | -- | -- |
|            | Ca(ICC2/PI489777)SNP_02742 | 757  | C | T | 11 | 5   | -- | -- |
|            | Ca(ICC2/PI489777)SNP_02743 | 1006 | A | G | 18 | 3   | -- | -- |
| CakTC38378 | Ca(ICC2/PI489777)SNP_02744 | 373  | A | T | 4  | 5   | -- | -- |
|            | Ca(ICC2/PI489777)SNP_02745 | 472  | T | C | 5  | 5   | -- | -- |
|            | Ca(ICC2/PI489777)SNP_02746 | 665  | G | C | 10 | 4   | -- | -- |
|            | Ca(ICC2/PI489777)SNP_02747 | 846  | A | G | 9  | 4   | -- | -- |
|            | Ca(ICC2/PI489777)SNP_02748 | 984  | A | G | 4  | 3   | -- | -- |
| CakTC31430 | Ca(ICC2/PI489777)SNP_02749 | 564  | C | T | 3  | 3   | -- | -- |
|            | Ca(ICC2/PI489777)SNP_02750 | 597  | C | T | 4  | 4   | -- | -- |
| CakTC35076 | Ca(ICC2/PI489777)SNP_02751 | 465  | C | T | 9  | 7   | -- | -- |
|            | Ca(ICC2/PI489777)SNP_02752 | 510  | A | G | 11 | 7   | -- | -- |
|            | Ca(ICC2/PI489777)SNP_02753 | 1554 | C | T | 15 | 13  | -- | -- |
|            | Ca(ICC2/PI489777)SNP_02754 | 1756 | T | G | 19 | 9   | -- | -- |
| CakTC29565 | Ca(ICC2/PI489777)SNP_02755 | 751  | G | C | 19 | 11  | -- | -- |
|            | Ca(ICC2/PI489777)SNP_02756 | 790  | A | G | 18 | 9   | -- | -- |
| CakTC28331 | Ca(ICC2/PI489777)SNP_02757 | 180  | G | C | 7  | 5   | -- | -- |
|            | Ca(ICC2/PI489777)SNP_02758 | 642  | A | G | 11 | 4   | -- | -- |
|            | Ca(ICC2/PI489777)SNP_02759 | 707  | G | C | 9  | 5   | -- | -- |
|            | Ca(ICC2/PI489777)SNP_02760 | 3123 | G | A | 11 | 4   | -- | -- |
|            | Ca(ICC2/PI489777)SNP_02761 | 3211 | C | A | 6  | 3   | -- | -- |
| CakTC24007 | Ca(ICC2/PI489777)SNP_02762 | 1405 | G | T | 52 | 25  | -- | -- |
|            | Ca(ICC2/PI489777)SNP_02763 | 2265 | A | T | 38 | 17  | -- | -- |
|            | Ca(ICC2/PI489777)SNP_02764 | 2352 | T | C | 26 | 15  | -- | -- |
| CakTC08517 | Ca(ICC2/PI489777)SNP_02765 | 1699 | A | C | 3  | 4   | -- | -- |
|            | Ca(ICC2/PI489777)SNP_02766 | 1848 | T | G | 3  | 5   | -- | -- |
| CakTC41303 | Ca(ICC2/PI489777)SNP_02767 | 437  | T | C | 68 | 121 | -- | -- |
|            | Ca(ICC2/PI489777)SNP_02768 | 525  | G | C | 40 | 88  | -- | -- |
|            | Ca(ICC2/PI489777)SNP_02769 | 593  | A | T | 3  | 4   | -- | -- |
| CakTC34215 | Ca(ICC2/PI489777)SNP_02770 | 578  | G | A | 3  | 8   | -- | -- |
|            | Ca(ICC2/PI489777)SNP_02771 | 687  | T | C | 3  | 5   | -- | -- |
| CakTC27339 | Ca(ICC2/PI489777)SNP_02772 | 1345 | G | A | 16 | 10  | -- | -- |
|            | Ca(ICC2/PI489777)SNP_02773 | 1546 | G | A | 19 | 12  | -- | -- |
|            | Ca(ICC2/PI489777)SNP_02774 | 2198 | G | C | 33 | 15  | -- | -- |
| CakTC25167 | Ca(ICC2/PI489777)SNP_02775 | 195  | A | G | 5  | 3   | -- | -- |
|            | Ca(ICC2/PI489777)SNP_02776 | 550  | T | C | 9  | 8   | -- | -- |
|            | Ca(ICC2/PI489777)SNP_02777 | 1128 | G | A | 30 | 13  | -- | -- |
|            | Ca(ICC2/PI489777)SNP_02778 | 1488 | T | A | 30 | 6   | -- | -- |
|            | Ca(ICC2/PI489777)SNP_02779 | 1749 | T | A | 13 | 4   | -- | -- |
|            | Ca(ICC2/PI489777)SNP_02780 | 2028 | G | A | 9  | 3   | -- | -- |
|            | Ca(ICC2/PI489777)SNP_02781 | 2471 | T | C | 10 | 6   | -- | -- |
|            | Ca(ICC2/PI489777)SNP_02782 | 4572 | A | G | 10 | 5   | -- | -- |
|            | Ca(ICC2/PI489777)SNP_02783 | 5297 | T | A | 6  | 4   | -- | -- |
| CakTC10685 | Ca(ICC2/PI489777)SNP_02784 | 268  | T | C | 5  | 6   | -- | -- |
|            | Ca(ICC2/PI489777)SNP_02785 | 1535 | C | G | 14 | 4   | -- | -- |
| CakTC26815 | Ca(ICC2/PI489777)SNP_02786 | 1365 | A | C | 5  | 5   | -- | -- |
| CakTC40930 | Ca(ICC2/PI489777)SNP_02787 | 725  | A | G | 5  | 8   | -- | -- |
|            | Ca(ICC2/PI489777)SNP_02788 | 881  | T | C | 4  | 10  | -- | -- |
|            | Ca(ICC2/PI489777)SNP_02789 | 1577 | A | G | 11 | 15  | -- | -- |
|            | Ca(ICC2/PI489777)SNP_02790 | 1607 | T | C | 9  | 15  | -- | -- |
|            | Ca(ICC2/PI489777)SNP_02791 | 1748 | C | A | 5  | 4   | -- | -- |
| CakTC27451 | Ca(ICC2/PI489777)SNP_02792 | 1211 | G | A | 41 | 16  | -- | -- |
| CakTC27555 | Ca(ICC2/PI489777)SNP_02793 | 100  | T | C | 13 | 6   | -- | -- |
|            | Ca(ICC2/PI489777)SNP_02794 | 436  | C | T | 14 | 7   | -- | -- |
|            | Ca(ICC2/PI489777)SNP_02795 | 463  | C | T | 16 | 16  | -- | -- |
|            | Ca(ICC2/PI489777)SNP_02796 | 687  | G | A | 17 | 6   | -- | -- |
|            | Ca(ICC2/PI489777)SNP_02797 | 715  | C | T | 16 | 7   | -- | -- |
|            | Ca(ICC2/PI489777)SNP_02798 | 1374 | T | C | 9  | 8   | -- | -- |
| CakTC10396 | Ca(ICC2/PI489777)SNP_02799 | 167  | G | T | 4  | 6   | -- | -- |
|            | Ca(ICC2/PI489777)SNP_02800 | 702  | G | A | 4  | 3   | -- | -- |
|            | Ca(ICC2/PI489777)SNP_02801 | 775  | A | G | 7  | 5   | -- | -- |
|            | Ca(ICC2/PI489777)SNP_02802 | 798  | G | A | 7  | 5   | -- | -- |
|            | Ca(ICC2/PI489777)SNP_02803 | 862  | T | A | 7  | 3   | -- | -- |
|            | Ca(ICC2/PI489777)SNP_02804 | 884  | G | A | 6  | 3   | -- | -- |
|            | Ca(ICC2/PI489777)SNP_02805 | 974  | G | C | 6  | 3   | -- | -- |
|            | Ca(ICC2/PI489777)SNP_02806 | 977  | A | T | 6  | 3   | -- | -- |
| CakTC40828 | Ca(ICC2/PI489777)SNP_02807 | 507  | T | C | 4  | 6   | -- | -- |

|            |                             |      |   |   |     |     |       |              |
|------------|-----------------------------|------|---|---|-----|-----|-------|--------------|
| CakTC37009 | Ca(ICCV2/PI489777)SNP_02808 | 300  | T | A | 3   | 10  | --    | --           |
|            | Ca(ICCV2/PI489777)SNP_02809 | 330  | A | C | 3   | 10  | --    | --           |
|            | Ca(ICCV2/PI489777)SNP_02810 | 2109 | C | T | 15  | 12  | --    | --           |
|            | Ca(ICCV2/PI489777)SNP_02811 | 2594 | A | G | 4   | 6   | --    | --           |
| CakTC10857 | Ca(ICCV2/PI489777)SNP_02812 | 126  | C | T | 14  | 4   | --    | --           |
|            | Ca(ICCV2/PI489777)SNP_02813 | 139  | T | C | 14  | 4   | --    | --           |
|            | Ca(ICCV2/PI489777)SNP_02814 | 146  | A | C | 14  | 4   | --    | --           |
|            | Ca(ICCV2/PI489777)SNP_02815 | 154  | G | T | 14  | 4   | --    | --           |
|            | Ca(ICCV2/PI489777)SNP_02816 | 160  | T | G | 14  | 4   | --    | --           |
|            | Ca(ICCV2/PI489777)SNP_02817 | 273  | G | A | 13  | 6   | --    | --           |
| CakTC23024 | Ca(ICCV2/PI489777)SNP_02818 | 432  | T | C | 3   | 6   | --    | --           |
|            | Ca(ICCV2/PI489777)SNP_02819 | 674  | A | G | 7   | 6   | --    | --           |
| CakTC03896 | Ca(ICCV2/PI489777)SNP_02820 | 349  | T | C | 15  | 20  | --    | --           |
| CakTC25502 | Ca(ICCV2/PI489777)SNP_02821 | 422  | G | A | 10  | 9   | --    | --           |
|            | Ca(ICCV2/PI489777)SNP_02822 | 477  | T | C | 10  | 10  | --    | --           |
|            | Ca(ICCV2/PI489777)SNP_02823 | 560  | T | C | 12  | 11  | --    | --           |
|            | Ca(ICCV2/PI489777)SNP_02824 | 996  | G | A | 13  | 5   | --    | --           |
|            | Ca(ICCV2/PI489777)SNP_02825 | 1107 | G | C | 13  | 4   | --    | --           |
| CakTC22913 | Ca(ICCV2/PI489777)SNP_02826 | 327  | T | A | 3   | 3   | --    | --           |
| CakTC18325 | Ca(ICCV2/PI489777)SNP_02827 | 573  | A | G | 20  | 4   | --    | --           |
|            | Ca(ICCV2/PI489777)SNP_02828 | 654  | A | C | 19  | 4   | --    | --           |
|            | Ca(ICCV2/PI489777)SNP_02829 | 768  | C | A | 13  | 3   | --    | --           |
|            | Ca(ICCV2/PI489777)SNP_02830 | 783  | G | C | 12  | 3   | --    | --           |
|            | Ca(ICCV2/PI489777)SNP_02831 | 852  | T | C | 6   | 3   | --    | --           |
|            | Ca(ICCV2/PI489777)SNP_02832 | 1292 | C | T | 12  | 3   | --    | --           |
| CakTC27765 | Ca(ICCV2/PI489777)SNP_02833 | 429  | A | G | 21  | 13  | --    | --           |
|            | Ca(ICCV2/PI489777)SNP_02834 | 939  | T | C | 16  | 16  | --    | --           |
| CakTC38906 | Ca(ICCV2/PI489777)SNP_02835 | 344  | T | C | 13  | 12  | --    | --           |
| CakTC37475 | Ca(ICCV2/PI489777)SNP_02836 | 1276 | A | T | 68  | 25  | --    | --           |
|            | Ca(ICCV2/PI489777)SNP_02837 | 1438 | C | T | 91  | 16  | --    | --           |
|            | Ca(ICCV2/PI489777)SNP_02838 | 1454 | A | G | 80  | 16  | --    | --           |
|            | Ca(ICCV2/PI489777)SNP_02839 | 1488 | G | C | 89  | 18  | --    | --           |
|            | Ca(ICCV2/PI489777)SNP_02840 | 1551 | A | G | 90  | 19  | --    | --           |
| CakTC31437 | Ca(ICCV2/PI489777)SNP_02841 | 392  | A | G | 3   | 4   | Shoot | --           |
| CakTC43347 | Ca(ICCV2/PI489777)SNP_02842 | 301  | T | C | 7   | 3   | --    | --           |
|            | Ca(ICCV2/PI489777)SNP_02843 | 309  | G | T | 7   | 4   | --    | --           |
|            | Ca(ICCV2/PI489777)SNP_02844 | 320  | C | A | 8   | 3   | --    | --           |
|            | Ca(ICCV2/PI489777)SNP_02845 | 361  | G | T | 7   | 4   | --    | --           |
|            | Ca(ICCV2/PI489777)SNP_02846 | 410  | A | G | 9   | 4   | --    | --           |
|            | Ca(ICCV2/PI489777)SNP_02847 | 471  | A | G | 14  | 6   | --    | --           |
|            | Ca(ICCV2/PI489777)SNP_02848 | 573  | G | A | 16  | 11  | --    | --           |
|            | Ca(ICCV2/PI489777)SNP_02849 | 620  | C | A | 19  | 9   | --    | --           |
|            | Ca(ICCV2/PI489777)SNP_02850 | 810  | A | G | 9   | 10  | --    | --           |
|            | Ca(ICCV2/PI489777)SNP_02851 | 876  | A | T | 7   | 10  | --    | --           |
|            | Ca(ICCV2/PI489777)SNP_02852 | 903  | G | C | 7   | 9   | --    | --           |
| CakTC40126 | Ca(ICCV2/PI489777)SNP_02853 | 242  | C | T | 12  | 10  | --    | --           |
|            | Ca(ICCV2/PI489777)SNP_02854 | 1235 | G | A | 11  | 13  | --    | --           |
|            | Ca(ICCV2/PI489777)SNP_02855 | 1476 | G | A | 5   | 4   | --    | --           |
| CakTC40368 | Ca(ICCV2/PI489777)SNP_02856 | 712  | A | G | 19  | 28  | --    | --           |
| CakTC24634 | Ca(ICCV2/PI489777)SNP_02857 | 52   | G | T | 8   | 9   | --    | --           |
|            | Ca(ICCV2/PI489777)SNP_02858 | 137  | T | C | 23  | 18  | --    | --           |
|            | Ca(ICCV2/PI489777)SNP_02859 | 291  | T | C | 50  | 45  | --    | --           |
|            | Ca(ICCV2/PI489777)SNP_02860 | 633  | A | G | 197 | 134 | --    | --           |
|            | Ca(ICCV2/PI489777)SNP_02861 | 1104 | A | G | 232 | 128 | --    | --           |
|            | Ca(ICCV2/PI489777)SNP_02862 | 1288 | G | C | 184 | 139 | --    | --           |
| CakTC24018 | Ca(ICCV2/PI489777)SNP_02863 | 1076 | A | T | 13  | 3   | --    | --           |
|            | Ca(ICCV2/PI489777)SNP_02864 | 1131 | A | T | 11  | 3   | --    | --           |
| CakTC42688 | Ca(ICCV2/PI489777)SNP_02865 | 124  | A | C | 5   | 6   | --    | --           |
|            | Ca(ICCV2/PI489777)SNP_02866 | 906  | A | C | 6   | 3   | --    | --           |
|            | Ca(ICCV2/PI489777)SNP_02867 | 947  | T | C | 5   | 4   | --    | --           |
|            | Ca(ICCV2/PI489777)SNP_02868 | 1154 | T | C | 7   | 7   | --    | --           |
|            | Ca(ICCV2/PI489777)SNP_02869 | 1467 | G | T | 9   | 4   | --    | --           |
| CakTC28188 | Ca(ICCV2/PI489777)SNP_02870 | 378  | C | G | 73  | 6   | Shoot | C2C2-CO-like |
|            | Ca(ICCV2/PI489777)SNP_02871 | 499  | G | A | 41  | 5   | Shoot | C2C2-CO-like |
|            | Ca(ICCV2/PI489777)SNP_02872 | 701  | G | A | 24  | 4   | Shoot | C2C2-CO-like |
|            | Ca(ICCV2/PI489777)SNP_02873 | 1254 | C | T | 53  | 6   | Shoot | C2C2-CO-like |
|            | Ca(ICCV2/PI489777)SNP_02874 | 1288 | C | T | 49  | 7   | Shoot | C2C2-CO-like |
|            | Ca(ICCV2/PI489777)SNP_02875 | 1504 | A | G | 18  | 5   | Shoot | C2C2-CO-like |
|            | Ca(ICCV2/PI489777)SNP_02876 | 1509 | G | C | 29  | 5   | Shoot | C2C2-CO-like |
|            | Ca(ICCV2/PI489777)SNP_02877 | 1594 | C | T | 18  | 5   | Shoot | C2C2-CO-like |
| CakTC25895 | Ca(ICCV2/PI489777)SNP_02878 | 474  | T | C | 22  | 9   | --    | --           |
|            | Ca(ICCV2/PI489777)SNP_02879 | 480  | A | C | 20  | 10  | --    | --           |
|            | Ca(ICCV2/PI489777)SNP_02880 | 799  | G | C | 14  | 5   | --    | --           |
|            | Ca(ICCV2/PI489777)SNP_02881 | 1024 | G | A | 7   | 3   | --    | --           |

|            |                            |      |   |   |    |    |           |           |
|------------|----------------------------|------|---|---|----|----|-----------|-----------|
|            | Ca(ICC2/PI489777)SNP_02882 | 1215 | A | G | 15 | 8  | --        | --        |
|            | Ca(ICC2/PI489777)SNP_02883 | 1238 | C | T | 22 | 9  | --        | --        |
|            | Ca(ICC2/PI489777)SNP_02884 | 1789 | C | T | 42 | 12 | --        | --        |
| CakTC39597 | Ca(ICC2/PI489777)SNP_02885 | 42   | A | G | 4  | 6  | --        | --        |
|            | Ca(ICC2/PI489777)SNP_02886 | 524  | A | T | 11 | 10 | --        | --        |
|            | Ca(ICC2/PI489777)SNP_02887 | 987  | T | G | 22 | 8  | --        | --        |
| CakTC37530 | Ca(ICC2/PI489777)SNP_02888 | 81   | A | G | 59 | 14 | --        | --        |
|            | Ca(ICC2/PI489777)SNP_02889 | 179  | C | G | 80 | 23 | --        | --        |
|            | Ca(ICC2/PI489777)SNP_02890 | 1172 | G | T | 11 | 9  | --        | --        |
| CakTC40571 | Ca(ICC2/PI489777)SNP_02891 | 498  | G | A | 5  | 3  | --        | --        |
| CakTC32923 | Ca(ICC2/PI489777)SNP_02892 | 50   | C | T | 4  | 4  | --        | --        |
|            | Ca(ICC2/PI489777)SNP_02893 | 242  | C | G | 12 | 7  | --        | --        |
|            | Ca(ICC2/PI489777)SNP_02894 | 1119 | C | A | 11 | 15 | --        | --        |
|            | Ca(ICC2/PI489777)SNP_02895 | 1182 | T | C | 13 | 23 | --        | --        |
|            | Ca(ICC2/PI489777)SNP_02896 | 1677 | C | T | 24 | 18 | --        | --        |
| CakTC36504 | Ca(ICC2/PI489777)SNP_02897 | 848  | G | A | 5  | 3  | Young_pod | --        |
|            | Ca(ICC2/PI489777)SNP_02898 | 4126 | A | G | 3  | 3  | Young_pod | --        |
|            | Ca(ICC2/PI489777)SNP_02899 | 5025 | T | C | 12 | 17 | Young_pod | --        |
| CakTC22322 | Ca(ICC2/PI489777)SNP_02900 | 498  | G | A | 9  | 8  | --        | --        |
| CakTC26421 | Ca(ICC2/PI489777)SNP_02901 | 283  | A | T | 36 | 3  | --        | AP2-EREBP |
|            | Ca(ICC2/PI489777)SNP_02902 | 605  | T | C | 22 | 8  | --        | AP2-EREBP |
|            | Ca(ICC2/PI489777)SNP_02903 | 699  | T | A | 18 | 8  | --        | AP2-EREBP |
|            | Ca(ICC2/PI489777)SNP_02904 | 723  | A | C | 19 | 7  | --        | AP2-EREBP |
|            | Ca(ICC2/PI489777)SNP_02905 | 792  | T | C | 15 | 7  | --        | AP2-EREBP |
|            | Ca(ICC2/PI489777)SNP_02906 | 829  | T | G | 20 | 7  | --        | AP2-EREBP |
| CakTC39526 | Ca(ICC2/PI489777)SNP_02907 | 129  | T | G | 7  | 3  | --        | --        |
| CakTC29886 | Ca(ICC2/PI489777)SNP_02908 | 421  | T | C | 11 | 3  | --        | --        |
| CakTC37656 | Ca(ICC2/PI489777)SNP_02909 | 238  | T | C | 8  | 3  | --        | --        |
| CakTC39756 | Ca(ICC2/PI489777)SNP_02910 | 888  | A | G | 15 | 4  | --        | --        |
|            | Ca(ICC2/PI489777)SNP_02911 | 890  | A | G | 14 | 5  | --        | --        |
| CakTC26493 | Ca(ICC2/PI489777)SNP_02912 | 3074 | C | A | 3  | 5  | --        | --        |
| CakTC31951 | Ca(ICC2/PI489777)SNP_02913 | 1268 | T | C | 4  | 4  | --        | --        |
| CakTC33335 | Ca(ICC2/PI489777)SNP_02914 | 1738 | G | A | 15 | 7  | --        | --        |
|            | Ca(ICC2/PI489777)SNP_02915 | 1899 | C | T | 21 | 6  | --        | --        |
|            | Ca(ICC2/PI489777)SNP_02916 | 1925 | G | A | 18 | 8  | --        | --        |
|            | Ca(ICC2/PI489777)SNP_02917 | 2275 | C | G | 15 | 12 | --        | --        |
|            | Ca(ICC2/PI489777)SNP_02918 | 4669 | A | G | 6  | 5  | --        | --        |
| CakTC26437 | Ca(ICC2/PI489777)SNP_02919 | 116  | T | A | 8  | 5  | --        | --        |
|            | Ca(ICC2/PI489777)SNP_02920 | 125  | T | G | 9  | 5  | --        | --        |
|            | Ca(ICC2/PI489777)SNP_02921 | 605  | C | G | 8  | 3  | --        | --        |
| CakTC31717 | Ca(ICC2/PI489777)SNP_02922 | 411  | C | G | 7  | 8  | --        | --        |
|            | Ca(ICC2/PI489777)SNP_02923 | 1042 | A | G | 11 | 5  | --        | --        |
|            | Ca(ICC2/PI489777)SNP_02924 | 1443 | C | A | 3  | 6  | --        | --        |
| CakTC39244 | Ca(ICC2/PI489777)SNP_02925 | 457  | C | G | 10 | 11 | --        | --        |
|            | Ca(ICC2/PI489777)SNP_02926 | 687  | A | C | 3  | 12 | --        | --        |
|            | Ca(ICC2/PI489777)SNP_02927 | 1133 | G | A | 13 | 3  | --        | --        |
| CakTC34395 | Ca(ICC2/PI489777)SNP_02928 | 61   | T | C | 9  | 5  | --        | --        |
| CakTC28153 | Ca(ICC2/PI489777)SNP_02929 | 331  | A | G | 4  | 8  | --        | --        |
|            | Ca(ICC2/PI489777)SNP_02930 | 383  | C | T | 8  | 10 | --        | --        |
|            | Ca(ICC2/PI489777)SNP_02931 | 1159 | C | T | 21 | 10 | --        | --        |
|            | Ca(ICC2/PI489777)SNP_02932 | 1277 | T | C | 22 | 7  | --        | --        |
|            | Ca(ICC2/PI489777)SNP_02933 | 1430 | A | G | 20 | 10 | --        | --        |
|            | Ca(ICC2/PI489777)SNP_02934 | 1601 | C | T | 9  | 4  | --        | --        |
|            | Ca(ICC2/PI489777)SNP_02935 | 1610 | A | C | 8  | 4  | --        | --        |
|            | Ca(ICC2/PI489777)SNP_02936 | 1688 | C | T | 4  | 3  | --        | --        |
|            | Ca(ICC2/PI489777)SNP_02937 | 1752 | T | C | 7  | 3  | --        | --        |
|            | Ca(ICC2/PI489777)SNP_02938 | 1807 | G | A | 9  | 6  | --        | --        |
|            | Ca(ICC2/PI489777)SNP_02939 | 1826 | T | C | 14 | 6  | --        | --        |
|            | Ca(ICC2/PI489777)SNP_02940 | 1973 | T | C | 20 | 3  | --        | --        |
|            | Ca(ICC2/PI489777)SNP_02941 | 2465 | T | C | 12 | 11 | --        | --        |
|            | Ca(ICC2/PI489777)SNP_02942 | 2831 | A | G | 7  | 13 | --        | --        |
|            | Ca(ICC2/PI489777)SNP_02943 | 2939 | G | A | 3  | 11 | --        | --        |
|            | Ca(ICC2/PI489777)SNP_02944 | 3209 | A | C | 20 | 9  | --        | --        |
|            | Ca(ICC2/PI489777)SNP_02945 | 3253 | T | C | 18 | 11 | --        | --        |
|            | Ca(ICC2/PI489777)SNP_02946 | 3656 | G | A | 16 | 8  | --        | --        |
|            | Ca(ICC2/PI489777)SNP_02947 | 3879 | C | T | 13 | 4  | --        | --        |
| CakTC37997 | Ca(ICC2/PI489777)SNP_02948 | 298  | C | G | 11 | 3  | --        | TPR       |
|            | Ca(ICC2/PI489777)SNP_02949 | 337  | T | A | 11 | 4  | --        | TPR       |
|            | Ca(ICC2/PI489777)SNP_02950 | 764  | A | C | 4  | 3  | --        | TPR       |
|            | Ca(ICC2/PI489777)SNP_02951 | 1156 | G | T | 7  | 3  | --        | TPR       |
| CakTC41591 | Ca(ICC2/PI489777)SNP_02952 | 518  | T | C | 8  | 10 | --        | GNAT      |
| CakTC42332 | Ca(ICC2/PI489777)SNP_02953 | 1417 | A | G | 3  | 4  | --        | --        |
| CakTC38002 | Ca(ICC2/PI489777)SNP_02954 | 1158 | G | A | 4  | 5  | --        | --        |
|            | Ca(ICC2/PI489777)SNP_02955 | 1253 | C | T | 3  | 3  | --        | --        |



|            |                            |      |   |   |    |    |           |             |
|------------|----------------------------|------|---|---|----|----|-----------|-------------|
| CakTC03729 | Ca(ICC2/PI489777)SNP_02956 | 215  | C | G | 9  | 8  | --        | --          |
|            | Ca(ICC2/PI489777)SNP_02957 | 540  | G | A | 6  | 9  | --        | --          |
|            | Ca(ICC2/PI489777)SNP_02958 | 1159 | G | A | 4  | 6  | --        | --          |
|            | Ca(ICC2/PI489777)SNP_02959 | 1180 | G | A | 3  | 7  | --        | --          |
|            | Ca(ICC2/PI489777)SNP_02960 | 1253 | C | A | 4  | 7  | --        | --          |
| CakTC42249 | Ca(ICC2/PI489777)SNP_02961 | 172  | A | C | 11 | 10 | --        | --          |
|            | Ca(ICC2/PI489777)SNP_02962 | 792  | G | A | 21 | 11 | --        | --          |
| CakTC04358 | Ca(ICC2/PI489777)SNP_02963 | 1674 | C | A | 4  | 3  | --        | --          |
| CakTC22990 | Ca(ICC2/PI489777)SNP_02964 | 1232 | A | G | 5  | 3  | Young_pod | --          |
| CakTC10706 | Ca(ICC2/PI489777)SNP_02965 | 540  | C | T | 77 | 19 | --        | MYB-related |
|            | Ca(ICC2/PI489777)SNP_02966 | 720  | T | C | 64 | 20 | --        | MYB-related |
|            | Ca(ICC2/PI489777)SNP_02967 | 849  | C | T | 93 | 18 | --        | MYB-related |
|            | Ca(ICC2/PI489777)SNP_02968 | 1002 | A | C | 69 | 17 | --        | MYB-related |
| CakTC03637 | Ca(ICC2/PI489777)SNP_02969 | 182  | G | C | 31 | 65 | --        | --          |
| CakTC31961 | Ca(ICC2/PI489777)SNP_02970 | 1153 | A | T | 8  | 11 | --        | --          |
|            | Ca(ICC2/PI489777)SNP_02971 | 1318 | A | G | 9  | 12 | --        | --          |
|            | Ca(ICC2/PI489777)SNP_02972 | 1558 | A | G | 6  | 6  | --        | --          |
|            | Ca(ICC2/PI489777)SNP_02973 | 2161 | C | T | 6  | 3  | --        | --          |
|            | Ca(ICC2/PI489777)SNP_02974 | 2242 | G | A | 8  | 4  | --        | --          |
|            | Ca(ICC2/PI489777)SNP_02975 | 2320 | C | T | 5  | 6  | --        | --          |
|            | Ca(ICC2/PI489777)SNP_02976 | 2448 | C | T | 4  | 7  | --        | --          |
|            | Ca(ICC2/PI489777)SNP_02977 | 2464 | A | G | 3  | 7  | --        | --          |
| CakTC29464 | Ca(ICC2/PI489777)SNP_02978 | 166  | C | A | 8  | 3  | --        | --          |
|            | Ca(ICC2/PI489777)SNP_02979 | 198  | T | C | 8  | 3  | --        | --          |
|            | Ca(ICC2/PI489777)SNP_02980 | 731  | C | T | 8  | 4  | --        | --          |
|            | Ca(ICC2/PI489777)SNP_02981 | 1482 | A | G | 4  | 5  | --        | --          |
| CakTC38572 | Ca(ICC2/PI489777)SNP_02982 | 269  | G | A | 3  | 8  | Flower    | bud         |
|            | Ca(ICC2/PI489777)SNP_02983 | 295  | A | T | 4  | 8  | Flower    | bud         |
|            | Ca(ICC2/PI489777)SNP_02984 | 313  | A | G | 4  | 8  | Flower    | bud         |
|            | Ca(ICC2/PI489777)SNP_02985 | 361  | C | T | 4  | 5  | Flower    | bud         |
| CakTC29119 | Ca(ICC2/PI489777)SNP_02986 | 172  | A | C | 7  | 3  | --        | --          |
|            | Ca(ICC2/PI489777)SNP_02987 | 567  | G | C | 18 | 8  | --        | --          |
|            | Ca(ICC2/PI489777)SNP_02988 | 572  | G | C | 18 | 8  | --        | --          |
|            | Ca(ICC2/PI489777)SNP_02989 | 714  | C | A | 20 | 10 | --        | --          |
|            | Ca(ICC2/PI489777)SNP_02990 | 928  | A | G | 18 | 8  | --        | --          |
|            | Ca(ICC2/PI489777)SNP_02991 | 932  | C | G | 18 | 8  | --        | --          |
| CakTC07784 | Ca(ICC2/PI489777)SNP_02992 | 39   | A | G | 14 | 25 | --        | --          |
| CakTC41954 | Ca(ICC2/PI489777)SNP_02993 | 438  | G | A | 3  | 5  | Root      | --          |
|            | Ca(ICC2/PI489777)SNP_02994 | 784  | C | T | 6  | 3  | Root      | --          |
| CakTC22665 | Ca(ICC2/PI489777)SNP_02995 | 1207 | C | T | 11 | 4  | --        | --          |
| CakTC29116 | Ca(ICC2/PI489777)SNP_02996 | 96   | C | G | 4  | 3  | --        | --          |
| CakTC35713 | Ca(ICC2/PI489777)SNP_02997 | 182  | T | G | 6  | 6  | --        | --          |
|            | Ca(ICC2/PI489777)SNP_02998 | 827  | C | T | 10 | 5  | --        | --          |
|            | Ca(ICC2/PI489777)SNP_02999 | 855  | C | T | 10 | 6  | --        | --          |
|            | Ca(ICC2/PI489777)SNP_03000 | 996  | C | T | 9  | 7  | --        | --          |
| CakTC30349 | Ca(ICC2/PI489777)SNP_03001 | 340  | A | T | 3  | 24 | --        | --          |
|            | Ca(ICC2/PI489777)SNP_03002 | 352  | T | C | 3  | 23 | --        | --          |
|            | Ca(ICC2/PI489777)SNP_03003 | 1034 | A | G | 7  | 21 | --        | --          |
|            | Ca(ICC2/PI489777)SNP_03004 | 1259 | C | T | 7  | 24 | --        | --          |
|            | Ca(ICC2/PI489777)SNP_03005 | 1286 | G | A | 7  | 26 | --        | --          |
|            | Ca(ICC2/PI489777)SNP_03006 | 1364 | C | G | 6  | 24 | --        | --          |
|            | Ca(ICC2/PI489777)SNP_03007 | 1928 | T | C | 5  | 33 | --        | --          |
|            | Ca(ICC2/PI489777)SNP_03008 | 2018 | G | A | 7  | 20 | --        | --          |
|            | Ca(ICC2/PI489777)SNP_03009 | 2045 | T | C | 6  | 15 | --        | --          |
|            | Ca(ICC2/PI489777)SNP_03010 | 2089 | A | C | 6  | 15 | --        | --          |
| CakTC23686 | Ca(ICC2/PI489777)SNP_03011 | 540  | G | A | 17 | 9  | --        | --          |
|            | Ca(ICC2/PI489777)SNP_03012 | 588  | A | G | 18 | 10 | --        | --          |
|            | Ca(ICC2/PI489777)SNP_03013 | 656  | A | G | 19 | 11 | --        | --          |
| CakTC13103 | Ca(ICC2/PI489777)SNP_03014 | 1619 | C | T | 48 | 41 | --        | --          |
| CakTC39472 | Ca(ICC2/PI489777)SNP_03015 | 574  | G | T | 53 | 33 | --        | --          |
|            | Ca(ICC2/PI489777)SNP_03016 | 1468 | G | C | 27 | 27 | --        | --          |
| CakTC09016 | Ca(ICC2/PI489777)SNP_03017 | 551  | A | G | 6  | 7  | --        | --          |
| CakTC42086 | Ca(ICC2/PI489777)SNP_03018 | 306  | T | C | 8  | 5  | --        | --          |
|            | Ca(ICC2/PI489777)SNP_03019 | 528  | C | A | 4  | 5  | --        | --          |
| CakTC26452 | Ca(ICC2/PI489777)SNP_03020 | 10   | G | A | 4  | 4  | --        | --          |
|            | Ca(ICC2/PI489777)SNP_03021 | 226  | A | T | 9  | 15 | --        | --          |
|            | Ca(ICC2/PI489777)SNP_03022 | 227  | G | T | 9  | 15 | --        | --          |
|            | Ca(ICC2/PI489777)SNP_03023 | 243  | C | T | 11 | 16 | --        | --          |
|            | Ca(ICC2/PI489777)SNP_03024 | 546  | T | C | 29 | 30 | --        | --          |
|            | Ca(ICC2/PI489777)SNP_03025 | 763  | G | A | 23 | 34 | --        | --          |
|            | Ca(ICC2/PI489777)SNP_03026 | 1009 | A | G | 30 | 42 | --        | --          |
|            | Ca(ICC2/PI489777)SNP_03027 | 1031 | C | T | 31 | 38 | --        | --          |
|            | Ca(ICC2/PI489777)SNP_03028 | 1114 | T | C | 27 | 37 | --        | --          |
|            | Ca(ICC2/PI489777)SNP_03029 | 1122 | G | A | 30 | 35 | --        | --          |

|            |                            |      |   |   |    |    |           |      |
|------------|----------------------------|------|---|---|----|----|-----------|------|
| CakTC26205 | Ca(ICC2/PI489777)SNP_03030 | 547  | G | A | 46 | 12 | Young_pod | HB   |
|            | Ca(ICC2/PI489777)SNP_03031 | 589  | C | T | 46 | 11 | Young_pod | HB   |
|            | Ca(ICC2/PI489777)SNP_03032 | 943  | C | T | 47 | 3  | Young_pod | HB   |
|            | Ca(ICC2/PI489777)SNP_03033 | 2199 | A | G | 19 | 4  | Young_pod | HB   |
|            | Ca(ICC2/PI489777)SNP_03034 | 2217 | A | G | 21 | 4  | Young_pod | HB   |
| CakTC17912 | Ca(ICC2/PI489777)SNP_03035 | 612  | C | T | 3  | 3  | --        | --   |
|            | Ca(ICC2/PI489777)SNP_03036 | 804  | C | T | 3  | 3  | --        | --   |
| CakTC40559 | Ca(ICC2/PI489777)SNP_03037 | 175  | C | T | 5  | 4  | --        | --   |
| CakTC33469 | Ca(ICC2/PI489777)SNP_03038 | 200  | G | A | 12 | 21 | --        | --   |
|            | Ca(ICC2/PI489777)SNP_03039 | 338  | C | T | 15 | 26 | --        | --   |
|            | Ca(ICC2/PI489777)SNP_03040 | 464  | C | T | 15 | 16 | --        | --   |
| CakTC40809 | Ca(ICC2/PI489777)SNP_03041 | 292  | C | T | 3  | 3  | --        | --   |
| CakTC39389 | Ca(ICC2/PI489777)SNP_03042 | 102  | T | C | 6  | 3  | --        | --   |
|            | Ca(ICC2/PI489777)SNP_03043 | 238  | C | T | 11 | 6  | --        | --   |
|            | Ca(ICC2/PI489777)SNP_03044 | 327  | A | C | 13 | 8  | --        | --   |
|            | Ca(ICC2/PI489777)SNP_03045 | 1370 | T | C | 12 | 21 | --        | --   |
| CakTC34148 | Ca(ICC2/PI489777)SNP_03046 | 1389 | A | G | 3  | 4  | --        | --   |
|            | Ca(ICC2/PI489777)SNP_03047 | 1464 | G | A | 3  | 5  | --        | --   |
|            | Ca(ICC2/PI489777)SNP_03048 | 3007 | T | C | 8  | 4  | --        | --   |
|            | Ca(ICC2/PI489777)SNP_03049 | 3275 | A | G | 8  | 5  | --        | --   |
| CakTC36890 | Ca(ICC2/PI489777)SNP_03050 | 903  | T | C | 32 | 7  | --        | --   |
|            | Ca(ICC2/PI489777)SNP_03051 | 1245 | G | A | 21 | 13 | --        | --   |
|            | Ca(ICC2/PI489777)SNP_03052 | 1386 | T | C | 22 | 7  | --        | --   |
|            | Ca(ICC2/PI489777)SNP_03053 | 1518 | A | C | 31 | 5  | --        | --   |
|            | Ca(ICC2/PI489777)SNP_03054 | 1638 | T | G | 36 | 9  | --        | --   |
|            | Ca(ICC2/PI489777)SNP_03055 | 1734 | C | A | 38 | 9  | --        | --   |
|            | Ca(ICC2/PI489777)SNP_03056 | 2097 | C | T | 14 | 12 | --        | --   |
|            | Ca(ICC2/PI489777)SNP_03057 | 2343 | A | G | 12 | 7  | --        | --   |
|            | Ca(ICC2/PI489777)SNP_03058 | 2358 | A | G | 11 | 10 | --        | --   |
|            | Ca(ICC2/PI489777)SNP_03059 | 2386 | C | T | 11 | 8  | --        | --   |
|            | Ca(ICC2/PI489777)SNP_03060 | 2419 | C | T | 8  | 4  | --        | --   |
|            | Ca(ICC2/PI489777)SNP_03061 | 2445 | C | T | 7  | 3  | --        | --   |
|            | Ca(ICC2/PI489777)SNP_03062 | 2446 | C | A | 7  | 3  | --        | --   |
| CakTC00383 | Ca(ICC2/PI489777)SNP_03063 | 558  | T | C | 7  | 9  | --        | HSF  |
|            | Ca(ICC2/PI489777)SNP_03064 | 589  | G | A | 7  | 9  | --        | HSF  |
| CakTC41844 | Ca(ICC2/PI489777)SNP_03065 | 42   | T | A | 4  | 6  | --        | --   |
|            | Ca(ICC2/PI489777)SNP_03066 | 108  | T | C | 6  | 9  | --        | --   |
|            | Ca(ICC2/PI489777)SNP_03067 | 433  | T | C | 9  | 5  | --        | --   |
| CakTC42781 | Ca(ICC2/PI489777)SNP_03068 | 134  | C | T | 8  | 6  | --        | --   |
|            | Ca(ICC2/PI489777)SNP_03069 | 547  | C | G | 40 | 18 | --        | --   |
| CakTC38592 | Ca(ICC2/PI489777)SNP_03070 | 390  | T | C | 4  | 4  | --        | --   |
|            | Ca(ICC2/PI489777)SNP_03071 | 435  | C | T | 4  | 3  | --        | --   |
|            | Ca(ICC2/PI489777)SNP_03072 | 690  | A | T | 4  | 7  | --        | --   |
|            | Ca(ICC2/PI489777)SNP_03073 | 702  | T | C | 4  | 7  | --        | --   |
|            | Ca(ICC2/PI489777)SNP_03074 | 996  | C | A | 5  | 3  | --        | --   |
|            | Ca(ICC2/PI489777)SNP_03075 | 1224 | T | C | 4  | 4  | --        | --   |
|            | Ca(ICC2/PI489777)SNP_03076 | 1308 | T | A | 3  | 5  | --        | --   |
|            | Ca(ICC2/PI489777)SNP_03077 | 2093 | C | T | 6  | 5  | --        | --   |
|            | Ca(ICC2/PI489777)SNP_03078 | 2115 | A | G | 6  | 5  | --        | --   |
|            | Ca(ICC2/PI489777)SNP_03079 | 2234 | G | T | 5  | 3  | --        | --   |
|            | Ca(ICC2/PI489777)SNP_03080 | 2318 | G | C | 4  | 3  | --        | --   |
| CakTC27418 | Ca(ICC2/PI489777)SNP_03081 | 149  | G | A | 6  | 3  | --        | --   |
|            | Ca(ICC2/PI489777)SNP_03082 | 162  | A | G | 6  | 3  | --        | --   |
|            | Ca(ICC2/PI489777)SNP_03083 | 207  | T | A | 4  | 3  | --        | --   |
|            | Ca(ICC2/PI489777)SNP_03084 | 263  | A | G | 6  | 5  | --        | --   |
| CakTC39545 | Ca(ICC2/PI489777)SNP_03085 | 870  | A | G | 12 | 5  | --        | --   |
| CakTC32188 | Ca(ICC2/PI489777)SNP_03086 | 593  | C | T | 6  | 6  | --        | --   |
|            | Ca(ICC2/PI489777)SNP_03087 | 854  | C | T | 7  | 4  | --        | --   |
|            | Ca(ICC2/PI489777)SNP_03088 | 905  | G | A | 9  | 4  | --        | --   |
|            | Ca(ICC2/PI489777)SNP_03089 | 1232 | G | A | 7  | 4  | --        | --   |
|            | Ca(ICC2/PI489777)SNP_03090 | 1273 | C | A | 6  | 5  | --        | --   |
|            | Ca(ICC2/PI489777)SNP_03091 | 1333 | T | C | 4  | 5  | --        | --   |
| CakTC39747 | Ca(ICC2/PI489777)SNP_03092 | 227  | T | C | 4  | 6  | --        | --   |
| CakTC37150 | Ca(ICC2/PI489777)SNP_03093 | 261  | G | T | 13 | 16 | --        | --   |
|            | Ca(ICC2/PI489777)SNP_03094 | 354  | A | G | 20 | 21 | --        | --   |
|            | Ca(ICC2/PI489777)SNP_03095 | 928  | G | A | 61 | 17 | --        | --   |
|            | Ca(ICC2/PI489777)SNP_03096 | 1312 | C | T | 84 | 69 | --        | --   |
|            | Ca(ICC2/PI489777)SNP_03097 | 1423 | A | G | 68 | 64 | --        | --   |
|            | Ca(ICC2/PI489777)SNP_03098 | 1548 | A | G | 39 | 29 | --        | --   |
|            | Ca(ICC2/PI489777)SNP_03099 | 1612 | T | C | 4  | 14 | --        | --   |
|            | Ca(ICC2/PI489777)SNP_03100 | 1622 | C | A | 5  | 13 | --        | --   |
|            | Ca(ICC2/PI489777)SNP_03101 | 1647 | C | T | 5  | 11 | --        | --   |
| CakTC29485 | Ca(ICC2/PI489777)SNP_03102 | 668  | G | A | 6  | 3  | Mature    | Leaf |
| CakTC25386 | Ca(ICC2/PI489777)SNP_03103 | 417  | C | T | 64 | 16 | --        | --   |

|            |                            |      |   |   |    |    |        |     |
|------------|----------------------------|------|---|---|----|----|--------|-----|
| CakTC37169 | Ca(ICC2/PI489777)SNP_03104 | 1131 | C | T | 30 | 15 | --     | --  |
| CakTC37343 | Ca(ICC2/PI489777)SNP_03105 | 846  | T | G | 51 | 15 | --     | --  |
|            | Ca(ICC2/PI489777)SNP_03106 | 978  | G | A | 50 | 13 | --     | --  |
|            | Ca(ICC2/PI489777)SNP_03107 | 990  | A | G | 48 | 13 | --     | --  |
|            | Ca(ICC2/PI489777)SNP_03108 | 1047 | G | A | 45 | 12 | --     | --  |
| CakTC36276 | Ca(ICC2/PI489777)SNP_03109 | 2547 | C | T | 18 | 12 | --     | --  |
| CakTC31993 | Ca(ICC2/PI489777)SNP_03110 | 772  | C | T | 4  | 4  | --     | --  |
|            | Ca(ICC2/PI489777)SNP_03111 | 1212 | A | T | 6  | 3  | --     | --  |
|            | Ca(ICC2/PI489777)SNP_03112 | 1355 | A | G | 3  | 3  | --     | --  |
| CakTC26164 | Ca(ICC2/PI489777)SNP_03113 | 48   | A | C | 5  | 3  | --     | --  |
| CakTC32143 | Ca(ICC2/PI489777)SNP_03114 | 393  | A | G | 5  | 23 | Root   | --  |
|            | Ca(ICC2/PI489777)SNP_03115 | 401  | C | T | 5  | 21 | Root   | --  |
|            | Ca(ICC2/PI489777)SNP_03116 | 410  | A | C | 4  | 25 | Root   | --  |
|            | Ca(ICC2/PI489777)SNP_03117 | 813  | C | G | 3  | 33 | Root   | --  |
|            | Ca(ICC2/PI489777)SNP_03118 | 1218 | G | A | 4  | 25 | Root   | --  |
|            | Ca(ICC2/PI489777)SNP_03119 | 1271 | A | G | 5  | 21 | Root   | --  |
|            | Ca(ICC2/PI489777)SNP_03120 | 1529 | A | T | 7  | 38 | Root   | --  |
| CakTC28294 | Ca(ICC2/PI489777)SNP_03121 | 558  | G | T | 16 | 21 | Flower | bud |
| CakTC10060 | Ca(ICC2/PI489777)SNP_03122 | 1129 | T | C | 6  | 3  | --     | --  |
|            | Ca(ICC2/PI489777)SNP_03123 | 1460 | A | T | 13 | 4  | --     | --  |
|            | Ca(ICC2/PI489777)SNP_03124 | 1540 | G | A | 12 | 6  | --     | --  |
| CakTC40111 | Ca(ICC2/PI489777)SNP_03125 | 490  | T | C | 29 | 6  | --     | --  |
|            | Ca(ICC2/PI489777)SNP_03126 | 580  | A | G | 32 | 8  | --     | --  |
| CakTC27949 | Ca(ICC2/PI489777)SNP_03127 | 349  | C | G | 22 | 9  | --     | --  |
|            | Ca(ICC2/PI489777)SNP_03128 | 362  | T | C | 18 | 9  | --     | --  |
|            | Ca(ICC2/PI489777)SNP_03129 | 394  | C | A | 40 | 20 | --     | --  |
|            | Ca(ICC2/PI489777)SNP_03130 | 481  | T | C | 47 | 20 | --     | --  |
|            | Ca(ICC2/PI489777)SNP_03131 | 608  | A | G | 73 | 10 | --     | --  |
|            | Ca(ICC2/PI489777)SNP_03132 | 632  | G | T | 76 | 14 | --     | --  |
|            | Ca(ICC2/PI489777)SNP_03133 | 646  | T | G | 72 | 15 | --     | --  |
|            | Ca(ICC2/PI489777)SNP_03134 | 753  | C | T | 77 | 23 | --     | --  |
|            | Ca(ICC2/PI489777)SNP_03135 | 881  | G | A | 96 | 36 | --     | --  |
|            | Ca(ICC2/PI489777)SNP_03136 | 1105 | G | C | 82 | 21 | --     | --  |
|            | Ca(ICC2/PI489777)SNP_03137 | 1109 | G | A | 75 | 22 | --     | --  |
|            | Ca(ICC2/PI489777)SNP_03138 | 1181 | C | T | 53 | 16 | --     | --  |
|            | Ca(ICC2/PI489777)SNP_03139 | 1183 | A | G | 53 | 15 | --     | --  |
| CakTC42815 | Ca(ICC2/PI489777)SNP_03140 | 578  | G | A | 5  | 10 | --     | --  |
|            | Ca(ICC2/PI489777)SNP_03141 | 1283 | T | C | 7  | 3  | --     | --  |
|            | Ca(ICC2/PI489777)SNP_03142 | 1361 | C | T | 8  | 3  | --     | --  |
|            | Ca(ICC2/PI489777)SNP_03143 | 1730 | T | G | 7  | 5  | --     | --  |
|            | Ca(ICC2/PI489777)SNP_03144 | 1780 | C | T | 9  | 5  | --     | --  |
| CakTC11084 | Ca(ICC2/PI489777)SNP_03145 | 172  | T | C | 20 | 14 | --     | --  |
|            | Ca(ICC2/PI489777)SNP_03146 | 319  | C | T | 19 | 19 | --     | --  |
|            | Ca(ICC2/PI489777)SNP_03147 | 412  | C | T | 19 | 19 | --     | --  |
|            | Ca(ICC2/PI489777)SNP_03148 | 436  | T | C | 17 | 17 | --     | --  |
|            | Ca(ICC2/PI489777)SNP_03149 | 586  | A | G | 28 | 26 | --     | --  |
|            | Ca(ICC2/PI489777)SNP_03150 | 946  | C | T | 34 | 24 | --     | --  |
|            | Ca(ICC2/PI489777)SNP_03151 | 1015 | C | G | 29 | 19 | --     | --  |
|            | Ca(ICC2/PI489777)SNP_03152 | 1954 | A | G | 49 | 37 | --     | --  |
|            | Ca(ICC2/PI489777)SNP_03153 | 2041 | T | C | 44 | 37 | --     | --  |
| CakTC39647 | Ca(ICC2/PI489777)SNP_03154 | 357  | A | G | 13 | 9  | --     | --  |
|            | Ca(ICC2/PI489777)SNP_03155 | 395  | T | C | 15 | 10 | --     | --  |
|            | Ca(ICC2/PI489777)SNP_03156 | 945  | C | T | 25 | 13 | --     | --  |
|            | Ca(ICC2/PI489777)SNP_03157 | 1270 | T | G | 15 | 6  | --     | --  |
| CakTC40138 | Ca(ICC2/PI489777)SNP_03158 | 104  | A | T | 5  | 12 | --     | --  |
|            | Ca(ICC2/PI489777)SNP_03159 | 668  | A | G | 12 | 16 | --     | --  |
|            | Ca(ICC2/PI489777)SNP_03160 | 1115 | T | G | 11 | 9  | --     | --  |
| CakTC37951 | Ca(ICC2/PI489777)SNP_03161 | 337  | G | C | 50 | 62 | Flower | bud |
|            | Ca(ICC2/PI489777)SNP_03162 | 353  | T | C | 43 | 58 | Flower | bud |
|            | Ca(ICC2/PI489777)SNP_03163 | 406  | G | A | 29 | 56 | Flower | bud |
|            | Ca(ICC2/PI489777)SNP_03164 | 472  | T | A | 35 | 44 | Flower | bud |
|            | Ca(ICC2/PI489777)SNP_03165 | 878  | G | A | 10 | 5  | Flower | bud |
| CakTC34047 | Ca(ICC2/PI489777)SNP_03166 | 1696 | C | T | 6  | 6  | --     | --  |
|            | Ca(ICC2/PI489777)SNP_03167 | 1765 | G | A | 5  | 6  | --     | --  |
| CakTC33052 | Ca(ICC2/PI489777)SNP_03168 | 908  | C | T | 3  | 10 | --     | --  |
|            | Ca(ICC2/PI489777)SNP_03169 | 1173 | G | A | 3  | 5  | --     | --  |
| CakTC30711 | Ca(ICC2/PI489777)SNP_03170 | 354  | T | G | 4  | 10 | --     | --  |
|            | Ca(ICC2/PI489777)SNP_03171 | 723  | G | C | 3  | 4  | --     | --  |
|            | Ca(ICC2/PI489777)SNP_03172 | 1572 | C | T | 4  | 14 | --     | --  |
|            | Ca(ICC2/PI489777)SNP_03173 | 1677 | T | C | 3  | 10 | --     | --  |
| CakTC27820 | Ca(ICC2/PI489777)SNP_03174 | 90   | C | G | 3  | 3  | --     | --  |
| CakTC36322 | Ca(ICC2/PI489777)SNP_03175 | 763  | G | A | 12 | 11 | --     | --  |
|            | Ca(ICC2/PI489777)SNP_03176 | 1133 | A | T | 8  | 15 | --     | --  |
|            | Ca(ICC2/PI489777)SNP_03177 | 2182 | C | T | 9  | 7  | --     | --  |

|            |                             |      |   |   |    |    |           |    |
|------------|-----------------------------|------|---|---|----|----|-----------|----|
|            | Ca(ICCV2/PI489777)SNP_03178 | 3988 | A | T | 12 | 9  | --        | -- |
|            | Ca(ICCV2/PI489777)SNP_03179 | 4009 | G | A | 10 | 9  | --        | -- |
|            | Ca(ICCV2/PI489777)SNP_03180 | 4119 | A | G | 12 | 6  | --        | -- |
|            | Ca(ICCV2/PI489777)SNP_03181 | 4545 | A | C | 3  | 7  | --        | -- |
| CakTC17056 | Ca(ICCV2/PI489777)SNP_03182 | 179  | G | A | 24 | 7  | --        | -- |
|            | Ca(ICCV2/PI489777)SNP_03183 | 470  | T | C | 29 | 15 | --        | -- |
| CakTC07212 | Ca(ICCV2/PI489777)SNP_03184 | 301  | C | T | 12 | 9  | --        | -- |
|            | Ca(ICCV2/PI489777)SNP_03185 | 346  | G | T | 11 | 7  | --        | -- |
|            | Ca(ICCV2/PI489777)SNP_03186 | 472  | A | T | 3  | 4  | --        | -- |
|            | Ca(ICCV2/PI489777)SNP_03187 | 525  | G | A | 3  | 4  | --        | -- |
| CakTC09761 | Ca(ICCV2/PI489777)SNP_03188 | 1332 | A | G | 8  | 3  | --        | -- |
|            | Ca(ICCV2/PI489777)SNP_03189 | 1459 | G | T | 13 | 3  | --        | -- |
|            | Ca(ICCV2/PI489777)SNP_03190 | 1481 | A | G | 10 | 3  | --        | -- |
| CakTC41563 | Ca(ICCV2/PI489777)SNP_03191 | 622  | T | G | 11 | 3  | --        | -- |
| CakTC36854 | Ca(ICCV2/PI489777)SNP_03192 | 232  | T | C | 10 | 4  | Young_pod | -- |
| CakTC22822 | Ca(ICCV2/PI489777)SNP_03193 | 500  | T | A | 13 | 8  | --        | -- |
|            | Ca(ICCV2/PI489777)SNP_03194 | 795  | T | C | 34 | 18 | --        | -- |
|            | Ca(ICCV2/PI489777)SNP_03195 | 975  | G | A | 51 | 24 | --        | -- |
|            | Ca(ICCV2/PI489777)SNP_03196 | 1515 | C | T | 62 | 24 | --        | -- |
|            | Ca(ICCV2/PI489777)SNP_03197 | 1573 | C | T | 48 | 24 | --        | -- |
|            | Ca(ICCV2/PI489777)SNP_03198 | 1683 | A | G | 36 | 18 | --        | -- |
| CakTC36944 | Ca(ICCV2/PI489777)SNP_03199 | 557  | T | A | 6  | 4  | --        | -- |
| CakTC42742 | Ca(ICCV2/PI489777)SNP_03200 | 345  | T | C | 3  | 3  | --        | -- |
| CakTC37725 | Ca(ICCV2/PI489777)SNP_03201 | 14   | T | A | 6  | 5  | --        | -- |
|            | Ca(ICCV2/PI489777)SNP_03202 | 564  | G | A | 4  | 3  | --        | -- |
|            | Ca(ICCV2/PI489777)SNP_03203 | 704  | T | C | 5  | 6  | --        | -- |
|            | Ca(ICCV2/PI489777)SNP_03204 | 705  | G | A | 5  | 6  | --        | -- |
| CakTC41677 | Ca(ICCV2/PI489777)SNP_03205 | 399  | G | A | 8  | 4  | --        | -- |
|            | Ca(ICCV2/PI489777)SNP_03206 | 471  | C | T | 10 | 6  | --        | -- |
|            | Ca(ICCV2/PI489777)SNP_03207 | 1591 | T | C | 10 | 5  | --        | -- |
|            | Ca(ICCV2/PI489777)SNP_03208 | 1687 | A | G | 11 | 6  | --        | -- |
|            | Ca(ICCV2/PI489777)SNP_03209 | 1696 | T | A | 14 | 6  | --        | -- |
|            | Ca(ICCV2/PI489777)SNP_03210 | 1744 | A | G | 12 | 6  | --        | -- |
|            | Ca(ICCV2/PI489777)SNP_03211 | 1792 | A | T | 12 | 5  | --        | -- |
|            | Ca(ICCV2/PI489777)SNP_03212 | 1831 | T | A | 13 | 5  | --        | -- |
|            | Ca(ICCV2/PI489777)SNP_03213 | 1958 | A | C | 7  | 6  | --        | -- |
| CakTC35289 | Ca(ICCV2/PI489777)SNP_03214 | 688  | T | C | 24 | 15 | --        | -- |
|            | Ca(ICCV2/PI489777)SNP_03215 | 1186 | T | C | 14 | 11 | --        | -- |
|            | Ca(ICCV2/PI489777)SNP_03216 | 1453 | C | T | 14 | 11 | --        | -- |
|            | Ca(ICCV2/PI489777)SNP_03217 | 1499 | G | T | 15 | 9  | --        | -- |
|            | Ca(ICCV2/PI489777)SNP_03218 | 1807 | C | T | 13 | 7  | --        | -- |
|            | Ca(ICCV2/PI489777)SNP_03219 | 2329 | C | T | 22 | 13 | --        | -- |
|            | Ca(ICCV2/PI489777)SNP_03220 | 2371 | A | G | 20 | 13 | --        | -- |
|            | Ca(ICCV2/PI489777)SNP_03221 | 3031 | C | T | 31 | 12 | --        | -- |
|            | Ca(ICCV2/PI489777)SNP_03222 | 3034 | A | G | 29 | 12 | --        | -- |
|            | Ca(ICCV2/PI489777)SNP_03223 | 3223 | C | T | 39 | 17 | --        | -- |
|            | Ca(ICCV2/PI489777)SNP_03224 | 3394 | G | C | 36 | 18 | --        | -- |
|            | Ca(ICCV2/PI489777)SNP_03225 | 3718 | G | A | 28 | 14 | --        | -- |
|            | Ca(ICCV2/PI489777)SNP_03226 | 3910 | C | T | 15 | 16 | --        | -- |
|            | Ca(ICCV2/PI489777)SNP_03227 | 3916 | A | G | 13 | 17 | --        | -- |
|            | Ca(ICCV2/PI489777)SNP_03228 | 4195 | T | C | 3  | 10 | --        | -- |
| CakTC38242 | Ca(ICCV2/PI489777)SNP_03229 | 192  | T | A | 13 | 5  | --        | -- |
|            | Ca(ICCV2/PI489777)SNP_03230 | 242  | C | A | 14 | 5  | --        | -- |
|            | Ca(ICCV2/PI489777)SNP_03231 | 321  | A | T | 15 | 5  | --        | -- |
| CakTC38787 | Ca(ICCV2/PI489777)SNP_03232 | 69   | T | C | 16 | 5  | --        | -- |
|            | Ca(ICCV2/PI489777)SNP_03233 | 525  | T | C | 3  | 3  | --        | -- |
|            | Ca(ICCV2/PI489777)SNP_03234 | 999  | C | A | 9  | 12 | --        | -- |
|            | Ca(ICCV2/PI489777)SNP_03235 | 1071 | T | C | 9  | 12 | --        | -- |
|            | Ca(ICCV2/PI489777)SNP_03236 | 1090 | C | T | 8  | 11 | --        | -- |
|            | Ca(ICCV2/PI489777)SNP_03237 | 1265 | G | A | 4  | 4  | --        | -- |
| CakTC39381 | Ca(ICCV2/PI489777)SNP_03238 | 466  | C | T | 23 | 18 | --        | -- |
|            | Ca(ICCV2/PI489777)SNP_03239 | 684  | T | C | 29 | 24 | --        | -- |
|            | Ca(ICCV2/PI489777)SNP_03240 | 865  | A | G | 25 | 32 | --        | -- |
|            | Ca(ICCV2/PI489777)SNP_03241 | 1321 | C | T | 14 | 27 | --        | -- |
|            | Ca(ICCV2/PI489777)SNP_03242 | 1419 | C | T | 5  | 11 | --        | -- |
| CakTC30379 | Ca(ICCV2/PI489777)SNP_03243 | 101  | C | A | 18 | 6  | --        | -- |
|            | Ca(ICCV2/PI489777)SNP_03244 | 162  | C | T | 20 | 6  | --        | -- |
|            | Ca(ICCV2/PI489777)SNP_03245 | 167  | C | G | 20 | 6  | --        | -- |
|            | Ca(ICCV2/PI489777)SNP_03246 | 359  | G | C | 16 | 6  | --        | -- |
| CakTC37593 | Ca(ICCV2/PI489777)SNP_03247 | 1308 | C | G | 4  | 4  | --        | -- |
| CakTC26607 | Ca(ICCV2/PI489777)SNP_03248 | 1356 | A | G | 4  | 4  | --        | -- |
|            | Ca(ICCV2/PI489777)SNP_03249 | 1465 | A | G | 5  | 7  | --        | -- |
|            | Ca(ICCV2/PI489777)SNP_03250 | 1524 | C | T | 4  | 6  | --        | -- |
|            | Ca(ICCV2/PI489777)SNP_03251 | 1705 | C | A | 9  | 8  | --        | -- |

|            |                            |      |   |   |     |     |        |           |
|------------|----------------------------|------|---|---|-----|-----|--------|-----------|
|            | Ca(ICC2/PI489777)SNP_03252 | 1788 | C | A | 10  | 5   | --     | --        |
|            | Ca(ICC2/PI489777)SNP_03253 | 1927 | G | A | 19  | 3   | --     | --        |
|            | Ca(ICC2/PI489777)SNP_03254 | 2541 | A | G | 6   | 6   | --     | --        |
|            | Ca(ICC2/PI489777)SNP_03255 | 2694 | C | A | 10  | 9   | --     | --        |
|            | Ca(ICC2/PI489777)SNP_03256 | 2700 | C | T | 9   | 9   | --     | --        |
|            | Ca(ICC2/PI489777)SNP_03257 | 3367 | G | T | 7   | 4   | --     | --        |
| CakTC37345 | Ca(ICC2/PI489777)SNP_03258 | 489  | T | G | 3   | 3   | --     | bHLH      |
| CakTC22629 | Ca(ICC2/PI489777)SNP_03259 | 2040 | G | A | 13  | 4   | --     | --        |
|            | Ca(ICC2/PI489777)SNP_03260 | 2406 | C | T | 14  | 5   | --     | --        |
|            | Ca(ICC2/PI489777)SNP_03261 | 2640 | A | T | 10  | 5   | --     | --        |
|            | Ca(ICC2/PI489777)SNP_03262 | 3320 | C | T | 20  | 11  | --     | --        |
| CakTC29019 | Ca(ICC2/PI489777)SNP_03263 | 34   | T | C | 10  | 3   | --     | --        |
|            | Ca(ICC2/PI489777)SNP_03264 | 293  | C | T | 35  | 17  | --     | --        |
|            | Ca(ICC2/PI489777)SNP_03265 | 680  | C | T | 35  | 13  | --     | --        |
| CakTC38623 | Ca(ICC2/PI489777)SNP_03266 | 757  | A | G | 15  | 16  | --     | --        |
| CakTC40747 | Ca(ICC2/PI489777)SNP_03267 | 35   | A | G | 8   | 13  | --     | --        |
|            | Ca(ICC2/PI489777)SNP_03268 | 198  | C | G | 66  | 24  | --     | --        |
|            | Ca(ICC2/PI489777)SNP_03269 | 309  | A | G | 77  | 24  | --     | --        |
| CakTC32428 | Ca(ICC2/PI489777)SNP_03270 | 77   | A | G | 3   | 4   | Flower | bud       |
| CakTC13082 | Ca(ICC2/PI489777)SNP_03271 | 670  | C | T | 4   | 4   | --     | --        |
| CakTC34098 | Ca(ICC2/PI489777)SNP_03272 | 885  | C | T | 7   | 6   | --     | --        |
|            | Ca(ICC2/PI489777)SNP_03273 | 951  | C | T | 8   | 6   | --     | --        |
|            | Ca(ICC2/PI489777)SNP_03274 | 1077 | T | G | 7   | 9   | --     | --        |
|            | Ca(ICC2/PI489777)SNP_03275 | 1885 | G | A | 3   | 4   | --     | --        |
|            | Ca(ICC2/PI489777)SNP_03276 | 2038 | G | T | 3   | 5   | --     | --        |
|            | Ca(ICC2/PI489777)SNP_03277 | 2211 | T | C | 3   | 3   | --     | --        |
|            | Ca(ICC2/PI489777)SNP_03278 | 2212 | G | A | 3   | 3   | --     | --        |
|            | Ca(ICC2/PI489777)SNP_03279 | 2293 | C | T | 4   | 3   | --     | --        |
| CakTC40416 | Ca(ICC2/PI489777)SNP_03280 | 46   | A | G | 8   | 13  | --     | --        |
| CakTC37175 | Ca(ICC2/PI489777)SNP_03281 | 16   | A | T | 4   | 8   | --     | --        |
|            | Ca(ICC2/PI489777)SNP_03282 | 178  | C | T | 28  | 28  | --     | --        |
|            | Ca(ICC2/PI489777)SNP_03283 | 220  | T | A | 28  | 35  | --     | --        |
|            | Ca(ICC2/PI489777)SNP_03284 | 286  | T | C | 25  | 41  | --     | --        |
|            | Ca(ICC2/PI489777)SNP_03285 | 295  | C | T | 30  | 41  | --     | --        |
|            | Ca(ICC2/PI489777)SNP_03286 | 298  | C | T | 28  | 40  | --     | --        |
|            | Ca(ICC2/PI489777)SNP_03287 | 796  | G | A | 36  | 17  | --     | --        |
|            | Ca(ICC2/PI489777)SNP_03288 | 799  | C | T | 37  | 15  | --     | --        |
|            | Ca(ICC2/PI489777)SNP_03289 | 1282 | C | G | 39  | 28  | --     | --        |
|            | Ca(ICC2/PI489777)SNP_03290 | 1570 | C | T | 26  | 17  | --     | --        |
| CakTC30687 | Ca(ICC2/PI489777)SNP_03291 | 124  | T | C | 4   | 6   | --     | --        |
|            | Ca(ICC2/PI489777)SNP_03292 | 242  | T | C | 5   | 6   | --     | --        |
|            | Ca(ICC2/PI489777)SNP_03293 | 1046 | G | A | 5   | 3   | --     | --        |
| CakTC23451 | Ca(ICC2/PI489777)SNP_03294 | 889  | A | G | 11  | 4   | --     | --        |
| CakTC32441 | Ca(ICC2/PI489777)SNP_03295 | 201  | A | G | 10  | 8   | --     | AP2-EREBP |
| CakTC27625 | Ca(ICC2/PI489777)SNP_03296 | 136  | C | T | 105 | 44  | --     | --        |
|            | Ca(ICC2/PI489777)SNP_03297 | 149  | A | T | 104 | 48  | --     | --        |
|            | Ca(ICC2/PI489777)SNP_03298 | 193  | T | G | 125 | 59  | --     | --        |
|            | Ca(ICC2/PI489777)SNP_03299 | 1092 | C | T | 230 | 125 | --     | --        |
| CakTC23903 | Ca(ICC2/PI489777)SNP_03300 | 608  | C | A | 6   | 3   | --     | --        |
|            | Ca(ICC2/PI489777)SNP_03301 | 631  | C | T | 7   | 3   | --     | --        |
|            | Ca(ICC2/PI489777)SNP_03302 | 677  | C | T | 5   | 3   | --     | --        |
|            | Ca(ICC2/PI489777)SNP_03303 | 740  | T | C | 5   | 3   | --     | --        |
|            | Ca(ICC2/PI489777)SNP_03304 | 1269 | C | G | 22  | 3   | --     | --        |
|            | Ca(ICC2/PI489777)SNP_03305 | 1900 | A | T | 37  | 15  | --     | --        |
|            | Ca(ICC2/PI489777)SNP_03306 | 1982 | C | T | 37  | 17  | --     | --        |
|            | Ca(ICC2/PI489777)SNP_03307 | 2102 | C | G | 46  | 23  | --     | --        |
| CakTC25957 | Ca(ICC2/PI489777)SNP_03308 | 1547 | T | C | 10  | 3   | --     | --        |
| CakTC39029 | Ca(ICC2/PI489777)SNP_03309 | 656  | A | G | 3   | 5   | --     | --        |
| CakTC28976 | Ca(ICC2/PI489777)SNP_03310 | 235  | T | C | 12  | 4   | --     | WRKY      |
|            | Ca(ICC2/PI489777)SNP_03311 | 466  | C | T | 23  | 3   | --     | WRKY      |
|            | Ca(ICC2/PI489777)SNP_03312 | 1293 | A | G | 20  | 3   | --     | WRKY      |
|            | Ca(ICC2/PI489777)SNP_03313 | 1398 | T | A | 16  | 3   | --     | WRKY      |
| CakTC39135 | Ca(ICC2/PI489777)SNP_03314 | 934  | A | G | 23  | 4   | --     | --        |
|            | Ca(ICC2/PI489777)SNP_03315 | 1299 | G | A | 6   | 5   | --     | --        |
|            | Ca(ICC2/PI489777)SNP_03316 | 1359 | G | A | 6   | 5   | --     | --        |
|            | Ca(ICC2/PI489777)SNP_03317 | 1425 | G | C | 5   | 5   | --     | --        |
|            | Ca(ICC2/PI489777)SNP_03318 | 1476 | T | A | 7   | 5   | --     | --        |
|            | Ca(ICC2/PI489777)SNP_03319 | 1590 | A | T | 3   | 4   | --     | --        |
| CakTC32616 | Ca(ICC2/PI489777)SNP_03320 | 356  | G | A | 8   | 14  | --     | CCAAT     |
|            | Ca(ICC2/PI489777)SNP_03321 | 374  | C | T | 9   | 8   | --     | CCAAT     |
| CakTC26852 | Ca(ICC2/PI489777)SNP_03322 | 708  | A | G | 30  | 29  | --     | --        |
|            | Ca(ICC2/PI489777)SNP_03323 | 735  | G | A | 30  | 28  | --     | --        |
| CakTC28640 | Ca(ICC2/PI489777)SNP_03324 | 301  | T | C | 3   | 3   | --     | --        |
|            | Ca(ICC2/PI489777)SNP_03325 | 455  | G | A | 3   | 4   | --     | --        |

|            |                            |      |   |   |     |     |       |       |
|------------|----------------------------|------|---|---|-----|-----|-------|-------|
| CakTC38437 | Ca(ICC2/PI489777)SNP_03326 | 396  | T | C | 5   | 9   | --    | --    |
|            | Ca(ICC2/PI489777)SNP_03327 | 399  | C | T | 5   | 8   | --    | --    |
| CakTC34255 | Ca(ICC2/PI489777)SNP_03328 | 115  | G | A | 12  | 9   | --    | --    |
|            | Ca(ICC2/PI489777)SNP_03329 | 244  | A | C | 24  | 13  | --    | --    |
|            | Ca(ICC2/PI489777)SNP_03330 | 836  | G | A | 62  | 21  | --    | --    |
|            | Ca(ICC2/PI489777)SNP_03331 | 1178 | T | C | 14  | 19  | --    | --    |
|            | Ca(ICC2/PI489777)SNP_03332 | 1433 | G | A | 25  | 21  | --    | --    |
|            | Ca(ICC2/PI489777)SNP_03333 | 1812 | A | G | 22  | 20  | --    | --    |
| CakTC32891 | Ca(ICC2/PI489777)SNP_03334 | 178  | G | C | 3   | 5   | --    | --    |
|            | Ca(ICC2/PI489777)SNP_03335 | 280  | A | G | 5   | 6   | --    | --    |
|            | Ca(ICC2/PI489777)SNP_03336 | 330  | T | C | 5   | 7   | --    | --    |
| CakTC24611 | Ca(ICC2/PI489777)SNP_03337 | 674  | G | T | 16  | 13  | --    | --    |
|            | Ca(ICC2/PI489777)SNP_03338 | 887  | G | T | 26  | 13  | --    | --    |
|            | Ca(ICC2/PI489777)SNP_03339 | 3111 | G | A | 18  | 12  | --    | --    |
|            | Ca(ICC2/PI489777)SNP_03340 | 3359 | T | C | 20  | 11  | --    | --    |
|            | Ca(ICC2/PI489777)SNP_03341 | 3503 | A | C | 20  | 13  | --    | --    |
| CakTC25809 | Ca(ICC2/PI489777)SNP_03342 | 2484 | A | G | 7   | 3   | --    | --    |
| CakTC08458 | Ca(ICC2/PI489777)SNP_03343 | 1338 | C | T | 4   | 4   | --    | TRAF  |
|            | Ca(ICC2/PI489777)SNP_03344 | 1446 | A | G | 5   | 4   | --    | TRAF  |
| CakTC25199 | Ca(ICC2/PI489777)SNP_03345 | 3087 | C | T | 7   | 5   | --    | CCAAT |
|            | Ca(ICC2/PI489777)SNP_03346 | 4527 | T | C | 28  | 105 | --    | CCAAT |
|            | Ca(ICC2/PI489777)SNP_03347 | 4566 | G | A | 21  | 96  | --    | CCAAT |
|            | Ca(ICC2/PI489777)SNP_03348 | 4757 | A | C | 13  | 58  | --    | CCAAT |
|            | Ca(ICC2/PI489777)SNP_03349 | 4777 | G | T | 12  | 54  | --    | CCAAT |
|            | Ca(ICC2/PI489777)SNP_03350 | 4833 | T | G | 11  | 28  | --    | CCAAT |
|            | Ca(ICC2/PI489777)SNP_03351 | 4836 | A | C | 11  | 29  | --    | CCAAT |
|            | Ca(ICC2/PI489777)SNP_03352 | 4860 | G | C | 10  | 24  | --    | CCAAT |
| CakTC14670 | Ca(ICC2/PI489777)SNP_03353 | 732  | T | C | 5   | 3   | --    | --    |
|            | Ca(ICC2/PI489777)SNP_03354 | 1429 | C | T | 10  | 9   | --    | --    |
|            | Ca(ICC2/PI489777)SNP_03355 | 1467 | A | G | 7   | 9   | --    | --    |
|            | Ca(ICC2/PI489777)SNP_03356 | 2988 | C | T | 4   | 5   | --    | --    |
| CakTC29428 | Ca(ICC2/PI489777)SNP_03357 | 1116 | T | C | 4   | 3   | Shoot | --    |
| CakTC36457 | Ca(ICC2/PI489777)SNP_03358 | 585  | T | C | 38  | 20  | --    | --    |
|            | Ca(ICC2/PI489777)SNP_03359 | 673  | G | C | 43  | 19  | --    | --    |
|            | Ca(ICC2/PI489777)SNP_03360 | 2635 | A | G | 30  | 31  | --    | --    |
| CakTC23715 | Ca(ICC2/PI489777)SNP_03361 | 791  | A | G | 47  | 25  | --    | --    |
|            | Ca(ICC2/PI489777)SNP_03362 | 1237 | A | G | 111 | 31  | --    | --    |
| CakTC07881 | Ca(ICC2/PI489777)SNP_03363 | 5631 | T | C | 3   | 5   | --    | SNF2  |
| CakTC29889 | Ca(ICC2/PI489777)SNP_03364 | 191  | T | A | 5   | 3   | --    | --    |
|            | Ca(ICC2/PI489777)SNP_03365 | 1226 | A | C | 12  | 11  | --    | --    |
|            | Ca(ICC2/PI489777)SNP_03366 | 2686 | T | A | 3   | 3   | --    | --    |
| CakTC29855 | Ca(ICC2/PI489777)SNP_03367 | 191  | T | G | 3   | 3   | --    | CCHC  |
|            | Ca(ICC2/PI489777)SNP_03368 | 990  | A | G | 10  | 3   | --    | CCHC  |
| CakTC32509 | Ca(ICC2/PI489777)SNP_03369 | 2154 | C | A | 6   | 3   | --    | --    |
| CakTC01006 | Ca(ICC2/PI489777)SNP_03370 | 178  | A | G | 4   | 3   | --    | --    |
|            | Ca(ICC2/PI489777)SNP_03371 | 217  | C | T | 5   | 3   | --    | --    |
|            | Ca(ICC2/PI489777)SNP_03372 | 607  | G | A | 5   | 4   | --    | --    |
| CakTC38247 | Ca(ICC2/PI489777)SNP_03373 | 502  | A | T | 8   | 8   | --    | HB    |
|            | Ca(ICC2/PI489777)SNP_03374 | 599  | G | A | 10  | 6   | --    | HB    |
| CakTC30658 | Ca(ICC2/PI489777)SNP_03375 | 267  | C | T | 3   | 3   | --    | --    |
|            | Ca(ICC2/PI489777)SNP_03376 | 316  | C | A | 4   | 3   | --    | --    |
| CakTC33027 | Ca(ICC2/PI489777)SNP_03377 | 2584 | T | G | 12  | 17  | --    | --    |
| CakTC32697 | Ca(ICC2/PI489777)SNP_03378 | 383  | A | G | 11  | 18  | --    | --    |
|            | Ca(ICC2/PI489777)SNP_03379 | 517  | A | C | 3   | 8   | --    | --    |
| CakTC36228 | Ca(ICC2/PI489777)SNP_03380 | 1067 | C | T | 29  | 13  | --    | --    |
| CakTC34582 | Ca(ICC2/PI489777)SNP_03381 | 304  | A | C | 31  | 17  | --    | --    |
|            | Ca(ICC2/PI489777)SNP_03382 | 381  | C | T | 20  | 9   | --    | --    |
|            | Ca(ICC2/PI489777)SNP_03383 | 384  | A | T | 19  | 6   | --    | --    |
|            | Ca(ICC2/PI489777)SNP_03384 | 489  | G | T | 5   | 3   | --    | --    |
|            | Ca(ICC2/PI489777)SNP_03385 | 492  | T | A | 4   | 3   | --    | --    |
| CakTC37262 | Ca(ICC2/PI489777)SNP_03386 | 759  | G | C | 9   | 7   | --    | --    |
|            | Ca(ICC2/PI489777)SNP_03387 | 852  | G | A | 9   | 4   | --    | --    |
|            | Ca(ICC2/PI489777)SNP_03388 | 1495 | A | G | 8   | 6   | --    | --    |
| CakTC23308 | Ca(ICC2/PI489777)SNP_03389 | 340  | C | A | 16  | 9   | --    | --    |
|            | Ca(ICC2/PI489777)SNP_03390 | 375  | A | G | 14  | 13  | --    | --    |
| CakTC42185 | Ca(ICC2/PI489777)SNP_03391 | 17   | T | C | 17  | 10  | --    | --    |
|            | Ca(ICC2/PI489777)SNP_03392 | 18   | C | T | 17  | 10  | --    | --    |
| CakTC30004 | Ca(ICC2/PI489777)SNP_03393 | 365  | C | G | 9   | 5   | --    | --    |
| CakTC11886 | Ca(ICC2/PI489777)SNP_03394 | 281  | C | G | 21  | 14  | --    | --    |
|            | Ca(ICC2/PI489777)SNP_03395 | 438  | A | G | 22  | 17  | --    | --    |
|            | Ca(ICC2/PI489777)SNP_03396 | 1331 | A | G | 6   | 19  | --    | --    |
| CakTC27720 | Ca(ICC2/PI489777)SNP_03397 | 1164 | T | C | 7   | 3   | --    | --    |
| CakTC28278 | Ca(ICC2/PI489777)SNP_03398 | 1297 | C | A | 21  | 13  | --    | IWS1  |
|            | Ca(ICC2/PI489777)SNP_03399 | 1662 | T | C | 29  | 24  | --    | IWS1  |

|            |                            |      |   |   |    |    |       |            |
|------------|----------------------------|------|---|---|----|----|-------|------------|
|            | Ca(ICC2/PI489777)SNP_03400 | 1681 | C | A | 29 | 21 | --    | IWS1       |
| CakTC32790 | Ca(ICC2/PI489777)SNP_03401 | 155  | T | C | 17 | 5  | --    | --         |
|            | Ca(ICC2/PI489777)SNP_03402 | 2276 | C | T | 14 | 14 | --    | --         |
|            | Ca(ICC2/PI489777)SNP_03403 | 2481 | G | A | 15 | 11 | --    | --         |
|            | Ca(ICC2/PI489777)SNP_03404 | 2487 | G | A | 15 | 11 | --    | --         |
|            | Ca(ICC2/PI489777)SNP_03405 | 2493 | G | A | 15 | 10 | --    | --         |
|            | Ca(ICC2/PI489777)SNP_03406 | 2513 | T | G | 15 | 11 | --    | --         |
|            | Ca(ICC2/PI489777)SNP_03407 | 2706 | C | A | 9  | 9  | --    | --         |
| CakTC35051 | Ca(ICC2/PI489777)SNP_03408 | 6    | T | C | 5  | 4  | --    | --         |
|            | Ca(ICC2/PI489777)SNP_03409 | 146  | G | C | 6  | 4  | --    | --         |
| CakTC36807 | Ca(ICC2/PI489777)SNP_03410 | 566  | G | T | 22 | 4  | --    | --         |
|            | Ca(ICC2/PI489777)SNP_03411 | 647  | A | G | 27 | 4  | --    | --         |
|            | Ca(ICC2/PI489777)SNP_03412 | 744  | G | A | 28 | 5  | --    | --         |
|            | Ca(ICC2/PI489777)SNP_03413 | 761  | T | C | 29 | 5  | --    | --         |
|            | Ca(ICC2/PI489777)SNP_03414 | 2291 | G | A | 43 | 8  | --    | --         |
| CakTC23281 | Ca(ICC2/PI489777)SNP_03415 | 94   | A | C | 11 | 14 | --    | --         |
|            | Ca(ICC2/PI489777)SNP_03416 | 218  | A | G | 19 | 16 | --    | --         |
|            | Ca(ICC2/PI489777)SNP_03417 | 283  | G | A | 19 | 17 | --    | --         |
|            | Ca(ICC2/PI489777)SNP_03418 | 2560 | G | A | 12 | 5  | --    | --         |
|            | Ca(ICC2/PI489777)SNP_03419 | 2908 | T | C | 7  | 4  | --    | --         |
|            | Ca(ICC2/PI489777)SNP_03420 | 3008 | G | C | 4  | 3  | --    | --         |
| CakTC41452 | Ca(ICC2/PI489777)SNP_03421 | 439  | A | G | 14 | 6  | --    | --         |
|            | Ca(ICC2/PI489777)SNP_03422 | 554  | A | G | 15 | 6  | --    | --         |
|            | Ca(ICC2/PI489777)SNP_03423 | 728  | T | C | 8  | 5  | --    | --         |
| CakTC38371 | Ca(ICC2/PI489777)SNP_03424 | 1137 | T | G | 46 | 18 | --    | DBP        |
| CakTC12845 | Ca(ICC2/PI489777)SNP_03425 | 30   | C | T | 6  | 3  | --    | --         |
| CakTC37557 | Ca(ICC2/PI489777)SNP_03426 | 302  | T | C | 12 | 4  | --    | --         |
| CakTC40626 | Ca(ICC2/PI489777)SNP_03427 | 63   | G | T | 6  | 6  | --    | --         |
| CakTC23034 | Ca(ICC2/PI489777)SNP_03428 | 495  | C | T | 10 | 6  | --    | --         |
|            | Ca(ICC2/PI489777)SNP_03429 | 603  | A | C | 12 | 21 | --    | --         |
|            | Ca(ICC2/PI489777)SNP_03430 | 762  | T | A | 32 | 45 | --    | --         |
|            | Ca(ICC2/PI489777)SNP_03431 | 921  | C | T | 39 | 43 | --    | --         |
|            | Ca(ICC2/PI489777)SNP_03432 | 1071 | T | C | 55 | 40 | --    | --         |
|            | Ca(ICC2/PI489777)SNP_03433 | 1257 | A | G | 47 | 29 | --    | --         |
|            | Ca(ICC2/PI489777)SNP_03434 | 1479 | C | T | 61 | 77 | --    | --         |
| CakTC37311 | Ca(ICC2/PI489777)SNP_03435 | 657  | C | T | 10 | 5  | --    | --         |
|            | Ca(ICC2/PI489777)SNP_03436 | 982  | T | C | 8  | 9  | --    | --         |
|            | Ca(ICC2/PI489777)SNP_03437 | 1247 | T | C | 89 | 14 | --    | --         |
| CakTC31335 | Ca(ICC2/PI489777)SNP_03438 | 518  | A | G | 4  | 4  | --    | HB         |
|            | Ca(ICC2/PI489777)SNP_03439 | 545  | T | C | 4  | 4  | --    | HB         |
| CakTC31405 | Ca(ICC2/PI489777)SNP_03440 | 468  | C | A | 8  | 3  | --    | --         |
|            | Ca(ICC2/PI489777)SNP_03441 | 527  | A | T | 8  | 3  | --    | --         |
|            | Ca(ICC2/PI489777)SNP_03442 | 551  | C | T | 7  | 3  | --    | --         |
| CakTC27713 | Ca(ICC2/PI489777)SNP_03443 | 818  | G | A | 7  | 4  | Shoot | --         |
| CakTC24198 | Ca(ICC2/PI489777)SNP_03444 | 1185 | T | C | 7  | 3  | --    | --         |
|            | Ca(ICC2/PI489777)SNP_03445 | 1194 | T | A | 7  | 3  | --    | --         |
|            | Ca(ICC2/PI489777)SNP_03446 | 1350 | C | A | 5  | 4  | --    | --         |
|            | Ca(ICC2/PI489777)SNP_03447 | 1502 | T | C | 6  | 4  | --    | --         |
|            | Ca(ICC2/PI489777)SNP_03448 | 1505 | G | A | 3  | 4  | --    | --         |
|            | Ca(ICC2/PI489777)SNP_03449 | 1609 | T | A | 4  | 4  | --    | --         |
|            | Ca(ICC2/PI489777)SNP_03450 | 1610 | A | T | 4  | 4  | --    | --         |
| CakTC28652 | Ca(ICC2/PI489777)SNP_03451 | 1272 | A | T | 3  | 3  | --    | AP2-EREBP  |
| CakTC41254 | Ca(ICC2/PI489777)SNP_03452 | 468  | T | C | 6  | 6  | --    | --         |
|            | Ca(ICC2/PI489777)SNP_03453 | 1929 | T | G | 5  | 4  | --    | --         |
| CakTC37856 | Ca(ICC2/PI489777)SNP_03454 | 840  | G | A | 15 | 16 | --    | --         |
| CakTC10484 | Ca(ICC2/PI489777)SNP_03455 | 885  | A | G | 3  | 7  | --    | GRAS       |
|            | Ca(ICC2/PI489777)SNP_03456 | 1192 | C | T | 4  | 4  | --    | GRAS       |
|            | Ca(ICC2/PI489777)SNP_03457 | 1245 | T | C | 4  | 4  | --    | GRAS       |
| CakTC40262 | Ca(ICC2/PI489777)SNP_03458 | 258  | G | C | 3  | 7  | --    | --         |
|            | Ca(ICC2/PI489777)SNP_03459 | 507  | A | G | 7  | 9  | --    | --         |
| CakTC13507 | Ca(ICC2/PI489777)SNP_03460 | 162  | A | G | 5  | 3  | --    | --         |
|            | Ca(ICC2/PI489777)SNP_03461 | 211  | G | T | 7  | 4  | --    | --         |
|            | Ca(ICC2/PI489777)SNP_03462 | 213  | G | A | 7  | 4  | --    | --         |
|            | Ca(ICC2/PI489777)SNP_03463 | 308  | T | C | 8  | 4  | --    | --         |
| CakTC24889 | Ca(ICC2/PI489777)SNP_03464 | 401  | A | G | 6  | 8  | --    | --         |
|            | Ca(ICC2/PI489777)SNP_03465 | 1016 | T | C | 5  | 3  | --    | --         |
| CakTC41248 | Ca(ICC2/PI489777)SNP_03466 | 275  | G | A | 11 | 3  | --    | --         |
|            | Ca(ICC2/PI489777)SNP_03467 | 1031 | G | A | 10 | 3  | --    | --         |
|            | Ca(ICC2/PI489777)SNP_03468 | 1133 | A | G | 9  | 3  | --    | --         |
|            | Ca(ICC2/PI489777)SNP_03469 | 1219 | T | G | 11 | 3  | --    | --         |
|            | Ca(ICC2/PI489777)SNP_03470 | 2021 | C | G | 10 | 9  | --    | --         |
|            | Ca(ICC2/PI489777)SNP_03471 | 2099 | C | T | 7  | 6  | --    | --         |
|            | Ca(ICC2/PI489777)SNP_03472 | 2171 | G | A | 7  | 7  | --    | --         |
| CakTC39785 | Ca(ICC2/PI489777)SNP_03473 | 103  | A | G | 5  | 4  | --    | Alfin-like |

|            |                             |      |   |   |    |    |        |            |
|------------|-----------------------------|------|---|---|----|----|--------|------------|
|            | Ca(ICCV2/PI489777)SNP_03474 | 396  | T | C | 17 | 3  | --     | Alfin-like |
| CakTC42443 | Ca(ICCV2/PI489777)SNP_03475 | 369  | G | A | 25 | 32 | --     | --         |
|            | Ca(ICCV2/PI489777)SNP_03476 | 1082 | G | A | 43 | 29 | --     | --         |
|            | Ca(ICCV2/PI489777)SNP_03477 | 1122 | A | G | 45 | 25 | --     | --         |
|            | Ca(ICCV2/PI489777)SNP_03478 | 1141 | A | G | 44 | 28 | --     | --         |
|            | Ca(ICCV2/PI489777)SNP_03479 | 1477 | G | A | 24 | 11 | --     | --         |
|            | Ca(ICCV2/PI489777)SNP_03480 | 1534 | C | G | 19 | 11 | --     | --         |
| CakTC33835 | Ca(ICCV2/PI489777)SNP_03481 | 1376 | G | C | 6  | 11 | --     | --         |
|            | Ca(ICCV2/PI489777)SNP_03482 | 1968 | G | A | 12 | 3  | --     | --         |
| CakTC28806 | Ca(ICCV2/PI489777)SNP_03483 | 1097 | C | G | 4  | 5  | --     | --         |
|            | Ca(ICCV2/PI489777)SNP_03484 | 1109 | G | A | 3  | 5  | --     | --         |
| CakTC06734 | Ca(ICCV2/PI489777)SNP_03485 | 178  | A | G | 17 | 5  | --     | --         |
|            | Ca(ICCV2/PI489777)SNP_03486 | 273  | C | T | 20 | 7  | --     | --         |
|            | Ca(ICCV2/PI489777)SNP_03487 | 358  | A | G | 8  | 6  | --     | --         |
| CakTC40596 | Ca(ICCV2/PI489777)SNP_03488 | 607  | A | G | 35 | 23 | --     | --         |
|            | Ca(ICCV2/PI489777)SNP_03489 | 671  | G | C | 29 | 18 | --     | --         |
| CakTC29533 | Ca(ICCV2/PI489777)SNP_03490 | 827  | T | C | 5  | 6  | --     | --         |
| CakTC23160 | Ca(ICCV2/PI489777)SNP_03491 | 314  | T | C | 6  | 3  | Shoot  | --         |
|            | Ca(ICCV2/PI489777)SNP_03492 | 358  | T | C | 6  | 3  | Shoot  | --         |
|            | Ca(ICCV2/PI489777)SNP_03493 | 389  | G | A | 6  | 3  | Shoot  | --         |
|            | Ca(ICCV2/PI489777)SNP_03494 | 392  | A | G | 6  | 3  | Shoot  | --         |
|            | Ca(ICCV2/PI489777)SNP_03495 | 431  | T | A | 5  | 3  | Shoot  | --         |
|            | Ca(ICCV2/PI489777)SNP_03496 | 452  | C | A | 5  | 3  | Shoot  | --         |
| CakTC26871 | Ca(ICCV2/PI489777)SNP_03497 | 144  | T | G | 30 | 4  | --     | --         |
| CakTC41466 | Ca(ICCV2/PI489777)SNP_03498 | 802  | A | T | 14 | 8  | --     | --         |
|            | Ca(ICCV2/PI489777)SNP_03499 | 1865 | G | C | 10 | 13 | --     | --         |
| CakTC39295 | Ca(ICCV2/PI489777)SNP_03500 | 324  | A | T | 24 | 27 | --     | --         |
|            | Ca(ICCV2/PI489777)SNP_03501 | 409  | T | C | 26 | 26 | --     | --         |
|            | Ca(ICCV2/PI489777)SNP_03502 | 763  | T | C | 37 | 11 | --     | --         |
| CakTC36306 | Ca(ICCV2/PI489777)SNP_03503 | 417  | A | T | 14 | 11 | --     | --         |
|            | Ca(ICCV2/PI489777)SNP_03504 | 444  | T | A | 14 | 11 | --     | --         |
|            | Ca(ICCV2/PI489777)SNP_03505 | 630  | G | A | 23 | 19 | --     | --         |
|            | Ca(ICCV2/PI489777)SNP_03506 | 697  | G | A | 20 | 17 | --     | --         |
|            | Ca(ICCV2/PI489777)SNP_03507 | 1338 | C | T | 17 | 10 | --     | --         |
|            | Ca(ICCV2/PI489777)SNP_03508 | 1413 | C | T | 14 | 14 | --     | --         |
|            | Ca(ICCV2/PI489777)SNP_03509 | 1530 | A | G | 15 | 17 | --     | --         |
|            | Ca(ICCV2/PI489777)SNP_03510 | 2079 | C | T | 15 | 10 | --     | --         |
|            | Ca(ICCV2/PI489777)SNP_03511 | 2214 | C | T | 14 | 5  | --     | --         |
|            | Ca(ICCV2/PI489777)SNP_03512 | 2462 | A | C | 6  | 4  | --     | --         |
|            | Ca(ICCV2/PI489777)SNP_03513 | 2472 | A | C | 6  | 4  | --     | --         |
| CakTC28843 | Ca(ICCV2/PI489777)SNP_03514 | 921  | T | C | 3  | 3  | Flower | bud        |
| CakTC25246 | Ca(ICCV2/PI489777)SNP_03515 | 348  | T | C | 31 | 10 | --     | --         |
|            | Ca(ICCV2/PI489777)SNP_03516 | 789  | T | C | 32 | 10 | --     | --         |
|            | Ca(ICCV2/PI489777)SNP_03517 | 1071 | C | G | 39 | 6  | --     | --         |
|            | Ca(ICCV2/PI489777)SNP_03518 | 1281 | A | G | 31 | 5  | --     | --         |
|            | Ca(ICCV2/PI489777)SNP_03519 | 1294 | A | G | 33 | 6  | --     | --         |
|            | Ca(ICCV2/PI489777)SNP_03520 | 1300 | A | C | 33 | 5  | --     | --         |
|            | Ca(ICCV2/PI489777)SNP_03521 | 1515 | T | C | 35 | 7  | --     | --         |
|            | Ca(ICCV2/PI489777)SNP_03522 | 1539 | T | G | 33 | 7  | --     | --         |
|            | Ca(ICCV2/PI489777)SNP_03523 | 1722 | G | A | 52 | 4  | --     | --         |
|            | Ca(ICCV2/PI489777)SNP_03524 | 2073 | A | G | 26 | 3  | --     | --         |
| CakTC22888 | Ca(ICCV2/PI489777)SNP_03525 | 918  | C | T | 59 | 24 | --     | --         |
|            | Ca(ICCV2/PI489777)SNP_03526 | 1206 | A | G | 28 | 10 | --     | --         |
| CakTC41682 | Ca(ICCV2/PI489777)SNP_03527 | 434  | A | G | 20 | 17 | --     | --         |
|            | Ca(ICCV2/PI489777)SNP_03528 | 494  | C | A | 18 | 16 | --     | --         |
| CakTC36202 | Ca(ICCV2/PI489777)SNP_03529 | 334  | T | C | 34 | 25 | --     | --         |
|            | Ca(ICCV2/PI489777)SNP_03530 | 1006 | A | G | 34 | 26 | --     | --         |
|            | Ca(ICCV2/PI489777)SNP_03531 | 1243 | A | T | 46 | 28 | --     | --         |
|            | Ca(ICCV2/PI489777)SNP_03532 | 1558 | T | C | 46 | 36 | --     | --         |
|            | Ca(ICCV2/PI489777)SNP_03533 | 1874 | G | A | 50 | 30 | --     | --         |
|            | Ca(ICCV2/PI489777)SNP_03534 | 2327 | T | A | 40 | 43 | --     | --         |
| CakTC23578 | Ca(ICCV2/PI489777)SNP_03535 | 303  | C | A | 7  | 5  | Flower | bud        |
| CakTC23407 | Ca(ICCV2/PI489777)SNP_03536 | 301  | T | G | 16 | 4  | --     | --         |
| CakTC33561 | Ca(ICCV2/PI489777)SNP_03537 | 203  | G | A | 3  | 3  | --     | --         |
|            | Ca(ICCV2/PI489777)SNP_03538 | 277  | A | G | 3  | 3  | --     | --         |
|            | Ca(ICCV2/PI489777)SNP_03539 | 278  | C | T | 3  | 3  | --     | --         |
|            | Ca(ICCV2/PI489777)SNP_03540 | 343  | C | A | 4  | 4  | --     | --         |
| CakTC27161 | Ca(ICCV2/PI489777)SNP_03541 | 160  | G | A | 4  | 5  | --     | --         |
|            | Ca(ICCV2/PI489777)SNP_03542 | 772  | C | T | 46 | 10 | --     | --         |
|            | Ca(ICCV2/PI489777)SNP_03543 | 1597 | G | A | 24 | 14 | --     | --         |
|            | Ca(ICCV2/PI489777)SNP_03544 | 1975 | A | G | 16 | 12 | --     | --         |
|            | Ca(ICCV2/PI489777)SNP_03545 | 2290 | C | T | 12 | 14 | --     | --         |
|            | Ca(ICCV2/PI489777)SNP_03546 | 2548 | G | A | 18 | 13 | --     | --         |
|            | Ca(ICCV2/PI489777)SNP_03547 | 2737 | A | T | 16 | 6  | --     | --         |



|            |                            |      |   |   |     |    |       |     |
|------------|----------------------------|------|---|---|-----|----|-------|-----|
| CakTC37416 | Ca(ICC2/P1489777)SNP_03548 | 208  | G | A | 29  | 12 | --    | --  |
|            | Ca(ICC2/P1489777)SNP_03549 | 981  | G | A | 67  | 49 | --    | --  |
|            | Ca(ICC2/P1489777)SNP_03550 | 993  | G | T | 63  | 46 | --    | --  |
|            | Ca(ICC2/P1489777)SNP_03551 | 1038 | G | A | 56  | 40 | --    | --  |
|            | Ca(ICC2/P1489777)SNP_03552 | 1041 | T | A | 58  | 40 | --    | --  |
| CakTC33679 | Ca(ICC2/P1489777)SNP_03553 | 1122 | T | C | 9   | 11 | --    | --  |
|            | Ca(ICC2/P1489777)SNP_03554 | 1837 | T | C | 4   | 14 | --    | --  |
| CakTC24857 | Ca(ICC2/P1489777)SNP_03555 | 124  | T | C | 46  | 21 | --    | --  |
|            | Ca(ICC2/P1489777)SNP_03556 | 195  | G | A | 53  | 27 | --    | --  |
|            | Ca(ICC2/P1489777)SNP_03557 | 259  | T | C | 60  | 29 | --    | --  |
|            | Ca(ICC2/P1489777)SNP_03558 | 423  | C | G | 57  | 22 | --    | --  |
|            | Ca(ICC2/P1489777)SNP_03559 | 429  | C | T | 65  | 33 | --    | --  |
|            | Ca(ICC2/P1489777)SNP_03560 | 582  | A | G | 33  | 15 | --    | --  |
| CakTC26925 | Ca(ICC2/P1489777)SNP_03561 | 188  | T | C | 3   | 7  | --    | TPR |
|            | Ca(ICC2/P1489777)SNP_03562 | 607  | A | G | 4   | 3  | --    | TPR |
| CakTC23288 | Ca(ICC2/P1489777)SNP_03563 | 2374 | G | A | 68  | 6  | --    | --  |
|            | Ca(ICC2/P1489777)SNP_03564 | 2410 | A | G | 67  | 10 | --    | --  |
|            | Ca(ICC2/P1489777)SNP_03565 | 2437 | C | A | 64  | 13 | --    | --  |
|            | Ca(ICC2/P1489777)SNP_03566 | 2482 | A | C | 56  | 19 | --    | --  |
| CakTC24572 | Ca(ICC2/P1489777)SNP_03567 | 826  | G | A | 125 | 80 | --    | HB  |
|            | Ca(ICC2/P1489777)SNP_03568 | 865  | G | A | 132 | 87 | --    | HB  |
|            | Ca(ICC2/P1489777)SNP_03569 | 1363 | C | G | 46  | 69 | --    | HB  |
|            | Ca(ICC2/P1489777)SNP_03570 | 1603 | A | G | 23  | 15 | --    | HB  |
| CakTC41893 | Ca(ICC2/P1489777)SNP_03571 | 257  | A | G | 7   | 6  | --    | --  |
|            | Ca(ICC2/P1489777)SNP_03572 | 261  | C | T | 8   | 5  | --    | --  |
|            | Ca(ICC2/P1489777)SNP_03573 | 331  | T | G | 8   | 4  | --    | --  |
|            | Ca(ICC2/P1489777)SNP_03574 | 421  | G | T | 7   | 6  | --    | --  |
|            | Ca(ICC2/P1489777)SNP_03575 | 851  | A | G | 3   | 9  | --    | --  |
| CakTC42013 | Ca(ICC2/P1489777)SNP_03576 | 418  | T | C | 7   | 4  | Shoot | --  |
|            | Ca(ICC2/P1489777)SNP_03577 | 614  | A | G | 7   | 3  | Shoot | --  |
|            | Ca(ICC2/P1489777)SNP_03578 | 617  | G | A | 8   | 3  | Shoot | --  |
| CakTC27382 | Ca(ICC2/P1489777)SNP_03579 | 21   | C | G | 8   | 4  | --    | --  |
|            | Ca(ICC2/P1489777)SNP_03580 | 132  | C | G | 26  | 6  | --    | --  |
|            | Ca(ICC2/P1489777)SNP_03581 | 1016 | G | A | 24  | 4  | --    | --  |
|            | Ca(ICC2/P1489777)SNP_03582 | 1097 | A | G | 23  | 7  | --    | --  |
|            | Ca(ICC2/P1489777)SNP_03583 | 1115 | C | T | 21  | 9  | --    | --  |
|            | Ca(ICC2/P1489777)SNP_03584 | 1251 | T | G | 9   | 10 | --    | --  |
|            | Ca(ICC2/P1489777)SNP_03585 | 1433 | G | T | 9   | 7  | --    | --  |
| CakTC29234 | Ca(ICC2/P1489777)SNP_03586 | 998  | C | A | 8   | 5  | --    | --  |
|            | Ca(ICC2/P1489777)SNP_03587 | 1145 | T | C | 5   | 3  | --    | --  |
| CakTC38168 | Ca(ICC2/P1489777)SNP_03588 | 55   | T | C | 16  | 3  | --    | --  |
| CakTC22542 | Ca(ICC2/P1489777)SNP_03589 | 66   | T | A | 10  | 5  | Shoot | --  |
|            | Ca(ICC2/P1489777)SNP_03590 | 145  | C | G | 15  | 7  | Shoot | --  |
|            | Ca(ICC2/P1489777)SNP_03591 | 169  | T | C | 14  | 8  | Shoot | --  |
|            | Ca(ICC2/P1489777)SNP_03592 | 1378 | C | G | 24  | 14 | Shoot | --  |
|            | Ca(ICC2/P1489777)SNP_03593 | 1433 | C | A | 24  | 15 | Shoot | --  |
| CakTC20166 | Ca(ICC2/P1489777)SNP_03594 | 461  | A | G | 14  | 10 | --    | --  |
|            | Ca(ICC2/P1489777)SNP_03595 | 596  | A | G | 19  | 11 | --    | --  |
|            | Ca(ICC2/P1489777)SNP_03596 | 1211 | A | G | 15  | 6  | --    | --  |
| CakTC27903 | Ca(ICC2/P1489777)SNP_03597 | 406  | A | G | 6   | 3  | Shoot | --  |
| CakTC42913 | Ca(ICC2/P1489777)SNP_03598 | 231  | A | G | 18  | 16 | --    | --  |
|            | Ca(ICC2/P1489777)SNP_03599 | 408  | G | A | 18  | 11 | --    | --  |
|            | Ca(ICC2/P1489777)SNP_03600 | 491  | C | A | 19  | 13 | --    | --  |
|            | Ca(ICC2/P1489777)SNP_03601 | 589  | T | C | 18  | 13 | --    | --  |
| CakTC28375 | Ca(ICC2/P1489777)SNP_03602 | 117  | T | C | 6   | 10 | --    | --  |
|            | Ca(ICC2/P1489777)SNP_03603 | 351  | T | C | 11  | 12 | --    | --  |
|            | Ca(ICC2/P1489777)SNP_03604 | 374  | T | G | 9   | 12 | --    | --  |
|            | Ca(ICC2/P1489777)SNP_03605 | 853  | T | C | 10  | 5  | --    | --  |
|            | Ca(ICC2/P1489777)SNP_03606 | 876  | A | C | 12  | 5  | --    | --  |
|            | Ca(ICC2/P1489777)SNP_03607 | 1039 | G | A | 20  | 9  | --    | --  |
|            | Ca(ICC2/P1489777)SNP_03608 | 1192 | C | T | 30  | 9  | --    | --  |
|            | Ca(ICC2/P1489777)SNP_03609 | 1273 | T | C | 31  | 6  | --    | --  |
|            | Ca(ICC2/P1489777)SNP_03610 | 1375 | T | C | 26  | 7  | --    | --  |
|            | Ca(ICC2/P1489777)SNP_03611 | 1432 | C | A | 29  | 6  | --    | --  |
|            | Ca(ICC2/P1489777)SNP_03612 | 1886 | A | G | 29  | 14 | --    | --  |
|            | Ca(ICC2/P1489777)SNP_03613 | 2001 | T | C | 15  | 9  | --    | --  |
| CakTC30446 | Ca(ICC2/P1489777)SNP_03614 | 776  | A | T | 6   | 4  | --    | --  |
|            | Ca(ICC2/P1489777)SNP_03615 | 793  | C | T | 5   | 4  | --    | --  |
|            | Ca(ICC2/P1489777)SNP_03616 | 954  | G | T | 3   | 4  | --    | --  |
|            | Ca(ICC2/P1489777)SNP_03617 | 1380 | C | T | 7   | 6  | --    | --  |
|            | Ca(ICC2/P1489777)SNP_03618 | 2149 | C | T | 8   | 4  | --    | --  |
|            | Ca(ICC2/P1489777)SNP_03619 | 2228 | C | T | 8   | 4  | --    | --  |
|            | Ca(ICC2/P1489777)SNP_03620 | 2641 | T | C | 7   | 5  | --    | --  |
|            | Ca(ICC2/P1489777)SNP_03621 | 4252 | T | A | 7   | 5  | --    | --  |

|            |                             |      |   |   |     |     |           |            |
|------------|-----------------------------|------|---|---|-----|-----|-----------|------------|
|            | Ca(ICCV2/PI489777)SNP_03622 | 4284 | A | T | 7   | 4   | --        | --         |
| CakTC21290 | Ca(ICCV2/PI489777)SNP_03623 | 430  | T | G | 6   | 3   | --        | SET        |
|            | Ca(ICCV2/PI489777)SNP_03624 | 548  | C | T | 3   | 3   | --        | SET        |
|            | Ca(ICCV2/PI489777)SNP_03625 | 553  | T | C | 3   | 3   | --        | SET        |
|            | Ca(ICCV2/PI489777)SNP_03626 | 649  | G | C | 8   | 5   | --        | SET        |
|            | Ca(ICCV2/PI489777)SNP_03627 | 769  | C | T | 10  | 6   | --        | SET        |
|            | Ca(ICCV2/PI489777)SNP_03628 | 859  | C | T | 9   | 3   | --        | SET        |
|            | Ca(ICCV2/PI489777)SNP_03629 | 883  | T | A | 8   | 3   | --        | SET        |
| CakTC22684 | Ca(ICCV2/PI489777)SNP_03630 | 241  | A | G | 3   | 13  | --        | --         |
| CakTC40255 | Ca(ICCV2/PI489777)SNP_03631 | 1129 | A | G | 3   | 3   | Young_pod | --         |
| CakTC22243 | Ca(ICCV2/PI489777)SNP_03632 | 1022 | G | A | 417 | 155 | --        | --         |
| CakTC43049 | Ca(ICCV2/PI489777)SNP_03633 | 792  | A | G | 28  | 19  | --        | --         |
|            | Ca(ICCV2/PI489777)SNP_03634 | 879  | A | G | 18  | 12  | --        | --         |
| CakTC09728 | Ca(ICCV2/PI489777)SNP_03635 | 316  | A | C | 3   | 3   | --        | TPR        |
|            | Ca(ICCV2/PI489777)SNP_03636 | 322  | T | C | 3   | 3   | --        | TPR        |
|            | Ca(ICCV2/PI489777)SNP_03637 | 417  | C | A | 7   | 3   | --        | TPR        |
|            | Ca(ICCV2/PI489777)SNP_03638 | 435  | G | A | 7   | 3   | --        | TPR        |
|            | Ca(ICCV2/PI489777)SNP_03639 | 935  | A | G | 24  | 8   | --        | TPR        |
|            | Ca(ICCV2/PI489777)SNP_03640 | 1081 | T | A | 24  | 9   | --        | TPR        |
|            | Ca(ICCV2/PI489777)SNP_03641 | 1112 | C | G | 23  | 9   | --        | TPR        |
| CakTC24528 | Ca(ICCV2/PI489777)SNP_03642 | 657  | C | T | 3   | 3   | --        | --         |
|            | Ca(ICCV2/PI489777)SNP_03643 | 681  | G | T | 3   | 3   | --        | --         |
| CakTC37518 | Ca(ICCV2/PI489777)SNP_03644 | 466  | A | G | 10  | 4   | --        | --         |
| CakTC42650 | Ca(ICCV2/PI489777)SNP_03645 | 566  | G | A | 28  | 12  | --        | --         |
| CakTC42659 | Ca(ICCV2/PI489777)SNP_03646 | 580  | T | C | 9   | 9   | --        | --         |
|            | Ca(ICCV2/PI489777)SNP_03647 | 650  | G | C | 10  | 12  | --        | --         |
|            | Ca(ICCV2/PI489777)SNP_03648 | 1085 | C | T | 8   | 11  | --        | --         |
|            | Ca(ICCV2/PI489777)SNP_03649 | 1573 | C | T | 17  | 7   | --        | --         |
| CakTC15590 | Ca(ICCV2/PI489777)SNP_03650 | 470  | T | C | 3   | 4   | --        | --         |
| CakTC27073 | Ca(ICCV2/PI489777)SNP_03651 | 945  | T | C | 26  | 21  | --        | --         |
|            | Ca(ICCV2/PI489777)SNP_03652 | 959  | C | A | 26  | 25  | --        | --         |
|            | Ca(ICCV2/PI489777)SNP_03653 | 960  | T | C | 26  | 25  | --        | --         |
| CakTC10956 | Ca(ICCV2/PI489777)SNP_03654 | 722  | T | C | 3   | 3   | --        | --         |
| CakTC42564 | Ca(ICCV2/PI489777)SNP_03655 | 334  | G | A | 6   | 4   | --        | --         |
|            | Ca(ICCV2/PI489777)SNP_03656 | 848  | A | C | 7   | 6   | --        | --         |
| CakTC31375 | Ca(ICCV2/PI489777)SNP_03657 | 536  | C | A | 19  | 14  | --        | --         |
| CakTC22429 | Ca(ICCV2/PI489777)SNP_03658 | 1013 | C | G | 8   | 8   | --        | --         |
| CakTC39996 | Ca(ICCV2/PI489777)SNP_03659 | 541  | C | T | 114 | 72  | --        | --         |
|            | Ca(ICCV2/PI489777)SNP_03660 | 610  | A | G | 115 | 65  | --        | --         |
|            | Ca(ICCV2/PI489777)SNP_03661 | 688  | A | G | 107 | 56  | --        | --         |
|            | Ca(ICCV2/PI489777)SNP_03662 | 721  | A | G | 101 | 46  | --        | --         |
|            | Ca(ICCV2/PI489777)SNP_03663 | 1132 | T | A | 63  | 34  | --        | --         |
|            | Ca(ICCV2/PI489777)SNP_03664 | 1202 | A | G | 49  | 26  | --        | --         |
| CakTC29050 | Ca(ICCV2/PI489777)SNP_03665 | 102  | G | A | 4   | 3   | --        | --         |
| CakTC36101 | Ca(ICCV2/PI489777)SNP_03666 | 543  | T | G | 5   | 3   | --        | --         |
|            | Ca(ICCV2/PI489777)SNP_03667 | 927  | C | G | 4   | 5   | --        | --         |
|            | Ca(ICCV2/PI489777)SNP_03668 | 1009 | C | G | 4   | 3   | --        | --         |
|            | Ca(ICCV2/PI489777)SNP_03669 | 1077 | T | C | 4   | 3   | --        | --         |
|            | Ca(ICCV2/PI489777)SNP_03670 | 1421 | G | A | 7   | 8   | --        | --         |
|            | Ca(ICCV2/PI489777)SNP_03671 | 1517 | C | T | 8   | 8   | --        | --         |
|            | Ca(ICCV2/PI489777)SNP_03672 | 2349 | T | G | 7   | 4   | --        | --         |
|            | Ca(ICCV2/PI489777)SNP_03673 | 2428 | G | A | 4   | 4   | --        | --         |
| CakTC27326 | Ca(ICCV2/PI489777)SNP_03674 | 1524 | C | T | 3   | 3   | --        | --         |
| CakTC29544 | Ca(ICCV2/PI489777)SNP_03675 | 106  | T | A | 8   | 8   | --        | --         |
|            | Ca(ICCV2/PI489777)SNP_03676 | 280  | C | T | 8   | 12  | --        | --         |
|            | Ca(ICCV2/PI489777)SNP_03677 | 619  | G | C | 9   | 9   | --        | --         |
| CakTC40680 | Ca(ICCV2/PI489777)SNP_03678 | 511  | T | C | 3   | 3   | --        | --         |
| CakTC28139 | Ca(ICCV2/PI489777)SNP_03679 | 838  | G | C | 29  | 8   | --        | Alfin-like |
|            | Ca(ICCV2/PI489777)SNP_03680 | 1151 | A | T | 18  | 10  | --        | Alfin-like |
|            | Ca(ICCV2/PI489777)SNP_03681 | 2816 | A | C | 7   | 4   | --        | Alfin-like |
|            | Ca(ICCV2/PI489777)SNP_03682 | 3809 | C | T | 8   | 4   | --        | Alfin-like |
| CakTC08143 | Ca(ICCV2/PI489777)SNP_03683 | 691  | G | A | 4   | 7   | --        | --         |
| CakTC09133 | Ca(ICCV2/PI489777)SNP_03684 | 1423 | T | C | 3   | 3   | --        | --         |
|            | Ca(ICCV2/PI489777)SNP_03685 | 2096 | G | C | 4   | 3   | --        | --         |
|            | Ca(ICCV2/PI489777)SNP_03686 | 3843 | C | G | 4   | 4   | --        | --         |
| CakTC12543 | Ca(ICCV2/PI489777)SNP_03687 | 559  | T | G | 4   | 3   | --        | --         |
| CakTC37809 | Ca(ICCV2/PI489777)SNP_03688 | 422  | T | C | 4   | 4   | --        | --         |
|            | Ca(ICCV2/PI489777)SNP_03689 | 830  | C | T | 4   | 4   | --        | --         |
|            | Ca(ICCV2/PI489777)SNP_03690 | 839  | A | G | 4   | 4   | --        | --         |
| CakTC26375 | Ca(ICCV2/PI489777)SNP_03691 | 267  | G | A | 6   | 5   | --        | --         |
|            | Ca(ICCV2/PI489777)SNP_03692 | 465  | A | G | 5   | 6   | --        | --         |
|            | Ca(ICCV2/PI489777)SNP_03693 | 518  | G | A | 7   | 9   | --        | --         |
|            | Ca(ICCV2/PI489777)SNP_03694 | 626  | G | A | 5   | 6   | --        | --         |
|            | Ca(ICCV2/PI489777)SNP_03695 | 944  | G | T | 5   | 5   | --        | --         |

|            |                             |      |   |   |    |    |           |     |
|------------|-----------------------------|------|---|---|----|----|-----------|-----|
| CakTC29960 | Ca(ICCV2/PI489777)SNP_03696 | 253  | G | A | 51 | 17 | --        | --  |
|            | Ca(ICCV2/PI489777)SNP_03697 | 279  | A | T | 59 | 25 | --        | --  |
|            | Ca(ICCV2/PI489777)SNP_03698 | 281  | C | G | 62 | 24 | --        | --  |
|            | Ca(ICCV2/PI489777)SNP_03699 | 1371 | C | T | 64 | 27 | --        | --  |
|            | Ca(ICCV2/PI489777)SNP_03700 | 1401 | G | T | 59 | 26 | --        | --  |
|            | Ca(ICCV2/PI489777)SNP_03701 | 1488 | A | G | 51 | 25 | --        | --  |
|            | Ca(ICCV2/PI489777)SNP_03702 | 1839 | G | C | 40 | 7  | --        | --  |
| CakTC26641 | Ca(ICCV2/PI489777)SNP_03703 | 1096 | T | C | 9  | 3  | --        | --  |
|            | Ca(ICCV2/PI489777)SNP_03704 | 1339 | G | A | 11 | 3  | --        | --  |
| CakTC28193 | Ca(ICCV2/PI489777)SNP_03705 | 193  | C | A | 15 | 3  | Young_pod | FHA |
|            | Ca(ICCV2/PI489777)SNP_03706 | 497  | A | G | 7  | 5  | Young_pod | FHA |
|            | Ca(ICCV2/PI489777)SNP_03707 | 700  | A | G | 8  | 7  | Young_pod | FHA |
|            | Ca(ICCV2/PI489777)SNP_03708 | 1234 | A | T | 10 | 4  | Young_pod | FHA |
|            | Ca(ICCV2/PI489777)SNP_03709 | 1268 | G | A | 8  | 3  | Young_pod | FHA |
|            | Ca(ICCV2/PI489777)SNP_03710 | 1902 | C | G | 11 | 10 | Young_pod | FHA |
|            | Ca(ICCV2/PI489777)SNP_03711 | 1912 | C | T | 10 | 10 | Young_pod | FHA |
|            | Ca(ICCV2/PI489777)SNP_03712 | 1943 | T | G | 10 | 8  | Young_pod | FHA |
|            | Ca(ICCV2/PI489777)SNP_03713 | 1960 | G | A | 10 | 8  | Young_pod | FHA |
|            | Ca(ICCV2/PI489777)SNP_03714 | 1967 | C | T | 10 | 8  | Young_pod | FHA |
| CakTC23760 | Ca(ICCV2/PI489777)SNP_03715 | 1184 | G | A | 52 | 8  | --        | --  |
| CakTC26197 | Ca(ICCV2/PI489777)SNP_03716 | 1053 | T | A | 4  | 5  | --        | --  |
|            | Ca(ICCV2/PI489777)SNP_03717 | 1075 | A | G | 5  | 7  | --        | --  |
|            | Ca(ICCV2/PI489777)SNP_03718 | 1078 | G | A | 5  | 7  | --        | --  |
|            | Ca(ICCV2/PI489777)SNP_03719 | 1093 | G | A | 5  | 6  | --        | --  |
|            | Ca(ICCV2/PI489777)SNP_03720 | 1098 | A | G | 5  | 6  | --        | --  |
|            | Ca(ICCV2/PI489777)SNP_03721 | 1236 | G | C | 4  | 4  | --        | --  |
|            | Ca(ICCV2/PI489777)SNP_03722 | 1257 | G | A | 4  | 4  | --        | --  |
|            | Ca(ICCV2/PI489777)SNP_03723 | 1260 | A | G | 4  | 3  | --        | --  |
| CakTC42156 | Ca(ICCV2/PI489777)SNP_03724 | 435  | A | G | 26 | 12 | --        | --  |
|            | Ca(ICCV2/PI489777)SNP_03725 | 968  | G | A | 26 | 14 | --        | --  |
|            | Ca(ICCV2/PI489777)SNP_03726 | 1110 | T | A | 32 | 9  | --        | --  |
| CakTC28423 | Ca(ICCV2/PI489777)SNP_03727 | 3082 | T | C | 28 | 8  | --        | --  |
|            | Ca(ICCV2/PI489777)SNP_03728 | 3344 | T | G | 20 | 5  | --        | --  |
| CakTC38739 | Ca(ICCV2/PI489777)SNP_03729 | 521  | G | A | 5  | 3  | --        | --  |
|            | Ca(ICCV2/PI489777)SNP_03730 | 790  | A | C | 6  | 4  | --        | --  |
|            | Ca(ICCV2/PI489777)SNP_03731 | 1203 | T | G | 3  | 5  | --        | --  |
| CakTC23435 | Ca(ICCV2/PI489777)SNP_03732 | 240  | T | C | 12 | 3  | --        | --  |
|            | Ca(ICCV2/PI489777)SNP_03733 | 266  | G | C | 13 | 3  | --        | --  |
| CakTC41791 | Ca(ICCV2/PI489777)SNP_03734 | 89   | T | C | 8  | 5  | --        | --  |
|            | Ca(ICCV2/PI489777)SNP_03735 | 101  | A | G | 8  | 5  | --        | --  |
|            | Ca(ICCV2/PI489777)SNP_03736 | 114  | C | T | 9  | 5  | --        | --  |
|            | Ca(ICCV2/PI489777)SNP_03737 | 170  | C | T | 10 | 5  | --        | --  |
| CakTC40061 | Ca(ICCV2/PI489777)SNP_03738 | 295  | A | T | 9  | 4  | --        | --  |
|            | Ca(ICCV2/PI489777)SNP_03739 | 366  | C | T | 10 | 5  | --        | --  |
|            | Ca(ICCV2/PI489777)SNP_03740 | 394  | A | G | 10 | 6  | --        | --  |
|            | Ca(ICCV2/PI489777)SNP_03741 | 470  | T | C | 8  | 6  | --        | --  |
|            | Ca(ICCV2/PI489777)SNP_03742 | 740  | T | C | 7  | 18 | --        | --  |
|            | Ca(ICCV2/PI489777)SNP_03743 | 741  | C | T | 7  | 18 | --        | --  |
| CakTC28358 | Ca(ICCV2/PI489777)SNP_03744 | 1327 | C | T | 10 | 3  | --        | --  |
| CakTC38268 | Ca(ICCV2/PI489777)SNP_03745 | 385  | A | T | 19 | 16 | --        | --  |
|            | Ca(ICCV2/PI489777)SNP_03746 | 544  | A | T | 9  | 12 | --        | --  |
| CakTC26055 | Ca(ICCV2/PI489777)SNP_03747 | 238  | T | C | 4  | 6  | --        | --  |
|            | Ca(ICCV2/PI489777)SNP_03748 | 527  | T | C | 10 | 13 | --        | --  |
|            | Ca(ICCV2/PI489777)SNP_03749 | 605  | C | T | 10 | 17 | --        | --  |
| CakTC27184 | Ca(ICCV2/PI489777)SNP_03750 | 533  | T | A | 62 | 21 | --        | --  |
|            | Ca(ICCV2/PI489777)SNP_03751 | 634  | G | A | 60 | 11 | --        | --  |
| CakTC39202 | Ca(ICCV2/PI489777)SNP_03752 | 82   | C | T | 5  | 6  | --        | --  |
|            | Ca(ICCV2/PI489777)SNP_03753 | 189  | A | G | 11 | 7  | --        | --  |
|            | Ca(ICCV2/PI489777)SNP_03754 | 975  | G | T | 38 | 7  | --        | --  |
| CakTC40025 | Ca(ICCV2/PI489777)SNP_03755 | 516  | A | G | 81 | 20 | --        | --  |
|            | Ca(ICCV2/PI489777)SNP_03756 | 1213 | C | A | 20 | 7  | --        | --  |
| CakTC28925 | Ca(ICCV2/PI489777)SNP_03757 | 127  | C | G | 8  | 6  | --        | --  |
|            | Ca(ICCV2/PI489777)SNP_03758 | 140  | T | G | 10 | 7  | --        | --  |
|            | Ca(ICCV2/PI489777)SNP_03759 | 233  | A | C | 15 | 11 | --        | --  |
|            | Ca(ICCV2/PI489777)SNP_03760 | 405  | C | A | 11 | 12 | --        | --  |
|            | Ca(ICCV2/PI489777)SNP_03761 | 457  | G | A | 16 | 11 | --        | --  |
|            | Ca(ICCV2/PI489777)SNP_03762 | 489  | T | C | 14 | 9  | --        | --  |
|            | Ca(ICCV2/PI489777)SNP_03763 | 501  | G | A | 11 | 7  | --        | --  |
| CakTC42503 | Ca(ICCV2/PI489777)SNP_03764 | 1046 | A | G | 5  | 9  | --        | --  |
| CakTC26013 | Ca(ICCV2/PI489777)SNP_03765 | 212  | A | G | 10 | 5  | --        | --  |
|            | Ca(ICCV2/PI489777)SNP_03766 | 419  | T | C | 6  | 6  | --        | --  |
| CakTC30483 | Ca(ICCV2/PI489777)SNP_03767 | 1479 | A | G | 28 | 38 | --        | --  |
| CakTC41273 | Ca(ICCV2/PI489777)SNP_03768 | 126  | G | C | 10 | 17 | --        | --  |
|            | Ca(ICCV2/PI489777)SNP_03769 | 231  | A | C | 13 | 17 | --        | --  |

|            |                            |      |   |   |     |    |    |          |
|------------|----------------------------|------|---|---|-----|----|----|----------|
|            | Ca(ICC2/PI489777)SNP_03770 | 260  | A | G | 15  | 18 | -- | --       |
| CakTC08399 | Ca(ICC2/PI489777)SNP_03771 | 95   | A | T | 7   | 6  | -- | --       |
|            | Ca(ICC2/PI489777)SNP_03772 | 565  | C | G | 13  | 31 | -- | --       |
|            | Ca(ICC2/PI489777)SNP_03773 | 573  | C | A | 13  | 31 | -- | --       |
| CakTC34788 | Ca(ICC2/PI489777)SNP_03774 | 376  | T | G | 4   | 4  | -- | --       |
|            | Ca(ICC2/PI489777)SNP_03775 | 484  | T | C | 9   | 6  | -- | --       |
|            | Ca(ICC2/PI489777)SNP_03776 | 2627 | T | C | 5   | 3  | -- | --       |
|            | Ca(ICC2/PI489777)SNP_03777 | 2715 | A | C | 4   | 3  | -- | --       |
| CakTC27932 | Ca(ICC2/PI489777)SNP_03778 | 103  | A | T | 3   | 5  | -- | --       |
|            | Ca(ICC2/PI489777)SNP_03779 | 144  | T | A | 5   | 6  | -- | --       |
|            | Ca(ICC2/PI489777)SNP_03780 | 502  | G | A | 8   | 3  | -- | --       |
|            | Ca(ICC2/PI489777)SNP_03781 | 946  | G | A | 15  | 11 | -- | --       |
| CakTC26273 | Ca(ICC2/PI489777)SNP_03782 | 371  | C | T | 15  | 12 | -- | --       |
|            | Ca(ICC2/PI489777)SNP_03783 | 520  | A | G | 10  | 15 | -- | --       |
|            | Ca(ICC2/PI489777)SNP_03784 | 599  | T | C | 13  | 13 | -- | --       |
|            | Ca(ICC2/PI489777)SNP_03785 | 635  | T | G | 25  | 14 | -- | --       |
|            | Ca(ICC2/PI489777)SNP_03786 | 653  | T | C | 19  | 14 | -- | --       |
|            | Ca(ICC2/PI489777)SNP_03787 | 863  | A | G | 42  | 14 | -- | --       |
|            | Ca(ICC2/PI489777)SNP_03788 | 1013 | T | C | 35  | 17 | -- | --       |
|            | Ca(ICC2/PI489777)SNP_03789 | 1520 | C | A | 8   | 7  | -- | --       |
| CakTC40685 | Ca(ICC2/PI489777)SNP_03790 | 430  | C | T | 42  | 28 | -- | Trihelix |
|            | Ca(ICC2/PI489777)SNP_03791 | 462  | G | C | 34  | 25 | -- | Trihelix |
|            | Ca(ICC2/PI489777)SNP_03792 | 897  | G | A | 53  | 16 | -- | Trihelix |
|            | Ca(ICC2/PI489777)SNP_03793 | 940  | A | G | 62  | 18 | -- | Trihelix |
|            | Ca(ICC2/PI489777)SNP_03794 | 1126 | C | T | 53  | 18 | -- | Trihelix |
|            | Ca(ICC2/PI489777)SNP_03795 | 1162 | G | A | 54  | 17 | -- | Trihelix |
|            | Ca(ICC2/PI489777)SNP_03796 | 1210 | G | A | 47  | 20 | -- | Trihelix |
|            | Ca(ICC2/PI489777)SNP_03797 | 1237 | A | G | 40  | 19 | -- | Trihelix |
|            | Ca(ICC2/PI489777)SNP_03798 | 1325 | A | G | 40  | 15 | -- | Trihelix |
|            | Ca(ICC2/PI489777)SNP_03799 | 1349 | A | G | 43  | 15 | -- | Trihelix |
|            | Ca(ICC2/PI489777)SNP_03800 | 1372 | A | G | 41  | 18 | -- | Trihelix |
|            | Ca(ICC2/PI489777)SNP_03801 | 1834 | G | A | 14  | 14 | -- | Trihelix |
| CakTC42510 | Ca(ICC2/PI489777)SNP_03802 | 384  | T | C | 9   | 9  | -- | --       |
|            | Ca(ICC2/PI489777)SNP_03803 | 387  | T | C | 15  | 9  | -- | --       |
|            | Ca(ICC2/PI489777)SNP_03804 | 556  | T | A | 8   | 8  | -- | --       |
|            | Ca(ICC2/PI489777)SNP_03805 | 963  | T | G | 17  | 6  | -- | --       |
| CakTC26146 | Ca(ICC2/PI489777)SNP_03806 | 174  | G | C | 10  | 11 | -- | --       |
| CakTC42165 | Ca(ICC2/PI489777)SNP_03807 | 107  | C | A | 11  | 5  | -- | --       |
|            | Ca(ICC2/PI489777)SNP_03808 | 230  | T | G | 7   | 7  | -- | --       |
|            | Ca(ICC2/PI489777)SNP_03809 | 1169 | T | C | 18  | 8  | -- | --       |
|            | Ca(ICC2/PI489777)SNP_03810 | 1525 | G | T | 6   | 8  | -- | --       |
| CakTC28197 | Ca(ICC2/PI489777)SNP_03811 | 516  | A | G | 13  | 11 | -- | --       |
|            | Ca(ICC2/PI489777)SNP_03812 | 540  | C | A | 15  | 11 | -- | --       |
|            | Ca(ICC2/PI489777)SNP_03813 | 649  | T | C | 13  | 10 | -- | --       |
|            | Ca(ICC2/PI489777)SNP_03814 | 748  | T | C | 18  | 13 | -- | --       |
|            | Ca(ICC2/PI489777)SNP_03815 | 1039 | T | G | 9   | 11 | -- | --       |
|            | Ca(ICC2/PI489777)SNP_03816 | 1104 | T | C | 7   | 10 | -- | --       |
|            | Ca(ICC2/PI489777)SNP_03817 | 1833 | T | A | 13  | 10 | -- | --       |
|            | Ca(ICC2/PI489777)SNP_03818 | 2322 | C | T | 5   | 6  | -- | --       |
|            | Ca(ICC2/PI489777)SNP_03819 | 2353 | T | C | 3   | 6  | -- | --       |
| CakTC36900 | Ca(ICC2/PI489777)SNP_03820 | 1170 | T | C | 12  | 6  | -- | --       |
|            | Ca(ICC2/PI489777)SNP_03821 | 1889 | C | T | 12  | 14 | -- | --       |
| CakTC22794 | Ca(ICC2/PI489777)SNP_03822 | 1101 | G | C | 16  | 6  | -- | --       |
|            | Ca(ICC2/PI489777)SNP_03823 | 1157 | C | T | 15  | 6  | -- | --       |
|            | Ca(ICC2/PI489777)SNP_03824 | 1173 | G | C | 15  | 7  | -- | --       |
|            | Ca(ICC2/PI489777)SNP_03825 | 1192 | C | T | 14  | 5  | -- | --       |
|            | Ca(ICC2/PI489777)SNP_03826 | 1236 | C | G | 12  | 5  | -- | --       |
|            | Ca(ICC2/PI489777)SNP_03827 | 1242 | C | T | 12  | 5  | -- | --       |
|            | Ca(ICC2/PI489777)SNP_03828 | 1349 | C | A | 13  | 5  | -- | --       |
|            | Ca(ICC2/PI489777)SNP_03829 | 1417 | T | A | 13  | 4  | -- | --       |
|            | Ca(ICC2/PI489777)SNP_03830 | 1443 | T | G | 10  | 4  | -- | --       |
|            | Ca(ICC2/PI489777)SNP_03831 | 1523 | G | A | 10  | 4  | -- | --       |
|            | Ca(ICC2/PI489777)SNP_03832 | 1635 | C | G | 10  | 3  | -- | --       |
|            | Ca(ICC2/PI489777)SNP_03833 | 1640 | T | C | 10  | 3  | -- | --       |
| CakTC37431 | Ca(ICC2/PI489777)SNP_03834 | 993  | G | A | 101 | 27 | -- | --       |
|            | Ca(ICC2/PI489777)SNP_03835 | 1071 | T | C | 23  | 7  | -- | --       |
| CakTC08369 | Ca(ICC2/PI489777)SNP_03836 | 1711 | A | C | 5   | 8  | -- | --       |
|            | Ca(ICC2/PI489777)SNP_03837 | 1720 | T | C | 6   | 6  | -- | --       |
|            | Ca(ICC2/PI489777)SNP_03838 | 1749 | A | G | 7   | 7  | -- | --       |
|            | Ca(ICC2/PI489777)SNP_03839 | 2715 | A | G | 3   | 3  | -- | --       |
| CakTC43240 | Ca(ICC2/PI489777)SNP_03840 | 1231 | G | A | 22  | 16 | -- | --       |
| CakTC28058 | Ca(ICC2/PI489777)SNP_03841 | 199  | T | A | 16  | 4  | -- | --       |
|            | Ca(ICC2/PI489777)SNP_03842 | 201  | C | T | 16  | 6  | -- | --       |
|            | Ca(ICC2/PI489777)SNP_03843 | 511  | A | G | 16  | 9  | -- | --       |

|            |                             |      |   |   |     |     |      |           |
|------------|-----------------------------|------|---|---|-----|-----|------|-----------|
| CakTC42885 | Ca(ICCV2/PI489777)SNP_03844 | 771  | T | A | 5   | 7   | --   | --        |
| CakTC25324 | Ca(ICCV2/PI489777)SNP_03845 | 738  | C | T | 7   | 3   | --   | --        |
|            | Ca(ICCV2/PI489777)SNP_03846 | 746  | G | A | 8   | 4   | --   | --        |
|            | Ca(ICCV2/PI489777)SNP_03847 | 908  | T | C | 8   | 3   | --   | --        |
|            | Ca(ICCV2/PI489777)SNP_03848 | 1233 | T | C | 3   | 3   | --   | --        |
| CakTC30811 | Ca(ICCV2/PI489777)SNP_03849 | 1781 | G | T | 4   | 3   | --   | --        |
| CakTC24490 | Ca(ICCV2/PI489777)SNP_03850 | 144  | G | T | 318 | 101 | --   | --        |
| CakTC26997 | Ca(ICCV2/PI489777)SNP_03851 | 560  | C | G | 17  | 16  | --   | --        |
|            | Ca(ICCV2/PI489777)SNP_03852 | 992  | A | C | 17  | 25  | --   | --        |
|            | Ca(ICCV2/PI489777)SNP_03853 | 1163 | A | G | 25  | 16  | --   | --        |
|            | Ca(ICCV2/PI489777)SNP_03854 | 1316 | G | T | 21  | 12  | --   | --        |
| CakTC36103 | Ca(ICCV2/PI489777)SNP_03855 | 2209 | G | A | 6   | 4   | Root | --        |
| CakTC27319 | Ca(ICCV2/PI489777)SNP_03856 | 418  | T | C | 11  | 5   | --   | --        |
| CakTC09452 | Ca(ICCV2/PI489777)SNP_03857 | 1483 | A | C | 4   | 3   | --   | --        |
| CakTC09874 | Ca(ICCV2/PI489777)SNP_03858 | 592  | C | T | 4   | 3   | --   | --        |
|            | Ca(ICCV2/PI489777)SNP_03859 | 734  | T | C | 3   | 3   | --   | --        |
|            | Ca(ICCV2/PI489777)SNP_03860 | 1259 | C | A | 32  | 23  | --   | --        |
|            | Ca(ICCV2/PI489777)SNP_03861 | 1614 | C | T | 20  | 14  | --   | --        |
|            | Ca(ICCV2/PI489777)SNP_03862 | 1672 | G | C | 18  | 21  | --   | --        |
| CakTC28027 | Ca(ICCV2/PI489777)SNP_03863 | 1655 | G | A | 6   | 3   | --   | --        |
|            | Ca(ICCV2/PI489777)SNP_03864 | 1751 | A | G | 5   | 4   | --   | --        |
|            | Ca(ICCV2/PI489777)SNP_03865 | 2106 | G | A | 9   | 4   | --   | --        |
| CakTC41605 | Ca(ICCV2/PI489777)SNP_03866 | 305  | T | C | 17  | 8   | --   | --        |
|            | Ca(ICCV2/PI489777)SNP_03867 | 1833 | A | G | 16  | 14  | --   | --        |
| CakTC37462 | Ca(ICCV2/PI489777)SNP_03868 | 558  | C | T | 9   | 4   | --   | --        |
|            | Ca(ICCV2/PI489777)SNP_03869 | 559  | C | A | 9   | 4   | --   | --        |
|            | Ca(ICCV2/PI489777)SNP_03870 | 663  | G | A | 10  | 5   | --   | --        |
|            | Ca(ICCV2/PI489777)SNP_03871 | 1007 | T | C | 15  | 3   | --   | --        |
| CakTC28336 | Ca(ICCV2/PI489777)SNP_03872 | 1994 | A | G | 15  | 16  | --   | --        |
|            | Ca(ICCV2/PI489777)SNP_03873 | 2191 | A | C | 8   | 3   | --   | --        |
|            | Ca(ICCV2/PI489777)SNP_03874 | 2212 | T | G | 6   | 3   | --   | --        |
| CakTC24250 | Ca(ICCV2/PI489777)SNP_03875 | 648  | C | T | 8   | 8   | --   | --        |
|            | Ca(ICCV2/PI489777)SNP_03876 | 1683 | C | T | 10  | 5   | --   | --        |
|            | Ca(ICCV2/PI489777)SNP_03877 | 1788 | C | G | 7   | 6   | --   | --        |
|            | Ca(ICCV2/PI489777)SNP_03878 | 1884 | T | C | 9   | 11  | --   | --        |
|            | Ca(ICCV2/PI489777)SNP_03879 | 2325 | G | A | 8   | 7   | --   | --        |
|            | Ca(ICCV2/PI489777)SNP_03880 | 2477 | A | T | 19  | 9   | --   | --        |
|            | Ca(ICCV2/PI489777)SNP_03881 | 2760 | G | A | 18  | 8   | --   | --        |
|            | Ca(ICCV2/PI489777)SNP_03882 | 2881 | G | A | 16  | 6   | --   | --        |
| CakTC23681 | Ca(ICCV2/PI489777)SNP_03883 | 498  | T | C | 11  | 9   | --   | AP2-EREBP |
|            | Ca(ICCV2/PI489777)SNP_03884 | 697  | C | G | 20  | 15  | --   | AP2-EREBP |
|            | Ca(ICCV2/PI489777)SNP_03885 | 761  | C | G | 19  | 15  | --   | AP2-EREBP |
| CakTC30615 | Ca(ICCV2/PI489777)SNP_03886 | 430  | T | G | 3   | 7   | --   | --        |
|            | Ca(ICCV2/PI489777)SNP_03887 | 537  | T | C | 3   | 7   | --   | --        |
| CakTC33099 | Ca(ICCV2/PI489777)SNP_03888 | 31   | A | C | 14  | 11  | --   | --        |
|            | Ca(ICCV2/PI489777)SNP_03889 | 159  | T | C | 14  | 17  | --   | --        |
|            | Ca(ICCV2/PI489777)SNP_03890 | 232  | G | C | 25  | 20  | --   | --        |
|            | Ca(ICCV2/PI489777)SNP_03891 | 295  | T | C | 25  | 19  | --   | --        |
|            | Ca(ICCV2/PI489777)SNP_03892 | 298  | T | C | 23  | 20  | --   | --        |
|            | Ca(ICCV2/PI489777)SNP_03893 | 434  | C | T | 15  | 8   | --   | --        |
|            | Ca(ICCV2/PI489777)SNP_03894 | 464  | T | C | 9   | 6   | --   | --        |
|            | Ca(ICCV2/PI489777)SNP_03895 | 500  | G | A | 10  | 8   | --   | --        |
| CakTC42354 | Ca(ICCV2/PI489777)SNP_03896 | 107  | T | C | 6   | 4   | --   | --        |
| CakTC12911 | Ca(ICCV2/PI489777)SNP_03897 | 631  | G | C | 3   | 4   | --   | --        |
| CakTC39712 | Ca(ICCV2/PI489777)SNP_03898 | 477  | G | A | 27  | 11  | --   | --        |
|            | Ca(ICCV2/PI489777)SNP_03899 | 997  | G | A | 24  | 15  | --   | --        |
|            | Ca(ICCV2/PI489777)SNP_03900 | 1137 | T | C | 20  | 8   | --   | --        |
|            | Ca(ICCV2/PI489777)SNP_03901 | 1242 | T | G | 4   | 3   | --   | --        |
| CakTC43182 | Ca(ICCV2/PI489777)SNP_03902 | 253  | G | C | 21  | 15  | --   | --        |
|            | Ca(ICCV2/PI489777)SNP_03903 | 496  | A | G | 7   | 7   | --   | --        |
|            | Ca(ICCV2/PI489777)SNP_03904 | 793  | G | A | 16  | 9   | --   | --        |
| CakTC39221 | Ca(ICCV2/PI489777)SNP_03905 | 397  | T | C | 8   | 8   | --   | --        |
|            | Ca(ICCV2/PI489777)SNP_03906 | 688  | T | C | 8   | 6   | --   | --        |
|            | Ca(ICCV2/PI489777)SNP_03907 | 955  | T | C | 8   | 3   | --   | --        |
| CakTC30393 | Ca(ICCV2/PI489777)SNP_03908 | 291  | C | T | 58  | 22  | --   | --        |
|            | Ca(ICCV2/PI489777)SNP_03909 | 1754 | A | C | 19  | 3   | --   | --        |
|            | Ca(ICCV2/PI489777)SNP_03910 | 1767 | G | C | 18  | 3   | --   | --        |
| CakTC30910 | Ca(ICCV2/PI489777)SNP_03911 | 480  | C | G | 13  | 21  | --   | --        |
|            | Ca(ICCV2/PI489777)SNP_03912 | 650  | C | A | 9   | 7   | --   | --        |
|            | Ca(ICCV2/PI489777)SNP_03913 | 812  | G | A | 6   | 4   | --   | --        |
| CakTC36450 | Ca(ICCV2/PI489777)SNP_03914 | 159  | A | T | 11  | 3   | --   | --        |
|            | Ca(ICCV2/PI489777)SNP_03915 | 183  | A | T | 15  | 3   | --   | --        |
|            | Ca(ICCV2/PI489777)SNP_03916 | 503  | C | T | 31  | 10  | --   | --        |
|            | Ca(ICCV2/PI489777)SNP_03917 | 1615 | A | G | 23  | 5   | --   | --        |

|            |                            |      |   |   |     |    |           |         |
|------------|----------------------------|------|---|---|-----|----|-----------|---------|
|            | Ca(ICC2/PI489777)SNP_03918 | 2658 | G | A | 10  | 9  | --        | --      |
| CakTC32488 | Ca(ICC2/PI489777)SNP_03919 | 382  | G | A | 12  | 5  | --        | TCP     |
|            | Ca(ICC2/PI489777)SNP_03920 | 922  | T | A | 6   | 3  | --        | TCP     |
| CakTC21235 | Ca(ICC2/PI489777)SNP_03921 | 931  | T | C | 3   | 15 | --        | --      |
| CakTC37871 | Ca(ICC2/PI489777)SNP_03922 | 268  | A | G | 11  | 6  | --        | --      |
|            | Ca(ICC2/PI489777)SNP_03923 | 292  | T | C | 11  | 6  | --        | --      |
|            | Ca(ICC2/PI489777)SNP_03924 | 1018 | A | G | 3   | 3  | --        | --      |
| CakTC33013 | Ca(ICC2/PI489777)SNP_03925 | 1967 | A | G | 41  | 22 | --        | --      |
|            | Ca(ICC2/PI489777)SNP_03926 | 2144 | G | A | 45  | 20 | --        | --      |
|            | Ca(ICC2/PI489777)SNP_03927 | 2294 | A | T | 24  | 20 | --        | --      |
|            | Ca(ICC2/PI489777)SNP_03928 | 2597 | G | A | 24  | 10 | --        | --      |
| CakTC09049 | Ca(ICC2/PI489777)SNP_03929 | 878  | T | C | 3   | 8  | --        | --      |
|            | Ca(ICC2/PI489777)SNP_03930 | 887  | C | T | 3   | 8  | --        | --      |
|            | Ca(ICC2/PI489777)SNP_03931 | 947  | A | G | 3   | 3  | --        | --      |
| CakTC26282 | Ca(ICC2/PI489777)SNP_03932 | 246  | C | G | 43  | 24 | --        | --      |
|            | Ca(ICC2/PI489777)SNP_03933 | 477  | C | T | 71  | 33 | --        | --      |
|            | Ca(ICC2/PI489777)SNP_03934 | 1486 | A | C | 63  | 10 | --        | --      |
| CakTC31534 | Ca(ICC2/PI489777)SNP_03935 | 500  | A | G | 10  | 6  | --        | --      |
|            | Ca(ICC2/PI489777)SNP_03936 | 644  | G | A | 11  | 12 | --        | --      |
|            | Ca(ICC2/PI489777)SNP_03937 | 1075 | T | C | 21  | 19 | --        | --      |
|            | Ca(ICC2/PI489777)SNP_03938 | 1493 | T | G | 11  | 9  | --        | --      |
|            | Ca(ICC2/PI489777)SNP_03939 | 1556 | C | T | 14  | 9  | --        | --      |
|            | Ca(ICC2/PI489777)SNP_03940 | 1844 | C | T | 17  | 11 | --        | --      |
|            | Ca(ICC2/PI489777)SNP_03941 | 1955 | G | A | 21  | 14 | --        | --      |
|            | Ca(ICC2/PI489777)SNP_03942 | 1988 | C | A | 22  | 13 | --        | --      |
|            | Ca(ICC2/PI489777)SNP_03943 | 2129 | G | A | 8   | 12 | --        | --      |
|            | Ca(ICC2/PI489777)SNP_03944 | 2452 | T | C | 15  | 8  | --        | --      |
|            | Ca(ICC2/PI489777)SNP_03945 | 2566 | A | T | 16  | 7  | --        | --      |
|            | Ca(ICC2/PI489777)SNP_03946 | 2690 | T | C | 17  | 5  | --        | --      |
| CakTC39935 | Ca(ICC2/PI489777)SNP_03947 | 536  | A | G | 6   | 14 | --        | C3H     |
| CakTC37131 | Ca(ICC2/PI489777)SNP_03948 | 113  | T | C | 8   | 6  | --        | --      |
|            | Ca(ICC2/PI489777)SNP_03949 | 593  | G | A | 8   | 7  | --        | --      |
| CakTC41223 | Ca(ICC2/PI489777)SNP_03950 | 333  | T | C | 31  | 14 | --        | --      |
|            | Ca(ICC2/PI489777)SNP_03951 | 336  | C | T | 32  | 14 | --        | --      |
|            | Ca(ICC2/PI489777)SNP_03952 | 475  | G | T | 39  | 17 | --        | --      |
|            | Ca(ICC2/PI489777)SNP_03953 | 489  | G | A | 39  | 17 | --        | --      |
|            | Ca(ICC2/PI489777)SNP_03954 | 2420 | A | G | 19  | 14 | --        | --      |
| CakTC03498 | Ca(ICC2/PI489777)SNP_03955 | 274  | A | G | 11  | 6  | --        | --      |
| CakTC29333 | Ca(ICC2/PI489777)SNP_03956 | 137  | A | G | 14  | 4  | --        | --      |
|            | Ca(ICC2/PI489777)SNP_03957 | 389  | G | C | 6   | 3  | --        | --      |
|            | Ca(ICC2/PI489777)SNP_03958 | 405  | T | C | 7   | 3  | --        | --      |
| CakTC35887 | Ca(ICC2/PI489777)SNP_03959 | 155  | T | C | 3   | 3  | Shoot     | --      |
| CakTC24111 | Ca(ICC2/PI489777)SNP_03960 | 176  | C | T | 7   | 4  | --        | --      |
| CakTC33931 | Ca(ICC2/PI489777)SNP_03961 | 247  | G | C | 26  | 19 | --        | --      |
| CakTC39905 | Ca(ICC2/PI489777)SNP_03962 | 654  | T | C | 18  | 22 | --        | --      |
|            | Ca(ICC2/PI489777)SNP_03963 | 735  | G | A | 17  | 25 | --        | --      |
|            | Ca(ICC2/PI489777)SNP_03964 | 747  | G | A | 18  | 23 | --        | --      |
|            | Ca(ICC2/PI489777)SNP_03965 | 783  | G | A | 15  | 21 | --        | --      |
|            | Ca(ICC2/PI489777)SNP_03966 | 1308 | G | A | 29  | 21 | --        | --      |
| CakTC26648 | Ca(ICC2/PI489777)SNP_03967 | 826  | T | C | 21  | 3  | --        | --      |
|            | Ca(ICC2/PI489777)SNP_03968 | 1494 | C | G | 17  | 4  | --        | --      |
|            | Ca(ICC2/PI489777)SNP_03969 | 1650 | G | C | 24  | 4  | --        | --      |
|            | Ca(ICC2/PI489777)SNP_03970 | 2483 | G | A | 31  | 5  | --        | --      |
|            | Ca(ICC2/PI489777)SNP_03971 | 2740 | C | T | 15  | 6  | --        | --      |
|            | Ca(ICC2/PI489777)SNP_03972 | 2765 | G | A | 23  | 6  | --        | --      |
|            | Ca(ICC2/PI489777)SNP_03973 | 2790 | T | C | 21  | 6  | --        | --      |
| CakTC30245 | Ca(ICC2/PI489777)SNP_03974 | 336  | G | A | 213 | 59 | --        | --      |
| CakTC31300 | Ca(ICC2/PI489777)SNP_03975 | 795  | G | A | 3   | 3  | Young_pod | --      |
| CakTC41835 | Ca(ICC2/PI489777)SNP_03976 | 1384 | A | C | 4   | 4  | --        | --      |
|            | Ca(ICC2/PI489777)SNP_03977 | 1463 | C | G | 5   | 5  | --        | --      |
|            | Ca(ICC2/PI489777)SNP_03978 | 1613 | A | G | 4   | 5  | --        | --      |
|            | Ca(ICC2/PI489777)SNP_03979 | 2153 | T | A | 4   | 3  | --        | --      |
|            | Ca(ICC2/PI489777)SNP_03980 | 2218 | T | C | 3   | 4  | --        | --      |
|            | Ca(ICC2/PI489777)SNP_03981 | 2410 | T | G | 3   | 3  | --        | --      |
|            | Ca(ICC2/PI489777)SNP_03982 | 2473 | G | A | 3   | 3  | --        | --      |
| CakTC40180 | Ca(ICC2/PI489777)SNP_03983 | 458  | G | A | 4   | 3  | --        | --      |
| CakTC30438 | Ca(ICC2/PI489777)SNP_03984 | 1390 | G | A | 4   | 5  | --        | --      |
| CakTC08977 | Ca(ICC2/PI489777)SNP_03985 | 852  | C | T | 3   | 4  | --        | Jumonji |
| CakTC27754 | Ca(ICC2/PI489777)SNP_03986 | 1694 | G | A | 4   | 3  | Shoot     | --      |
|            | Ca(ICC2/PI489777)SNP_03987 | 1779 | G | A | 3   | 4  | Shoot     | --      |
| CakTC41135 | Ca(ICC2/PI489777)SNP_03988 | 1601 | G | A | 3   | 3  | --        | --      |
| CakTC27778 | Ca(ICC2/PI489777)SNP_03989 | 939  | A | T | 3   | 4  | Young_pod | --      |
| CakTC35808 | Ca(ICC2/PI489777)SNP_03990 | 83   | T | C | 19  | 8  | --        | --      |
|            | Ca(ICC2/PI489777)SNP_03991 | 271  | C | T | 42  | 35 | --        | --      |

|            |                            |      |   |   |    |    |        |             |
|------------|----------------------------|------|---|---|----|----|--------|-------------|
|            | Ca(ICC2/PI489777)SNP_03992 | 514  | T | C | 18 | 34 | --     | --          |
|            | Ca(ICC2/PI489777)SNP_03993 | 556  | G | T | 33 | 38 | --     | --          |
|            | Ca(ICC2/PI489777)SNP_03994 | 715  | G | T | 39 | 20 | --     | --          |
|            | Ca(ICC2/PI489777)SNP_03995 | 1085 | G | A | 23 | 28 | --     | --          |
|            | Ca(ICC2/PI489777)SNP_03996 | 1094 | C | T | 24 | 30 | --     | --          |
|            | Ca(ICC2/PI489777)SNP_03997 | 1576 | A | G | 41 | 27 | --     | --          |
|            | Ca(ICC2/PI489777)SNP_03998 | 1627 | A | G | 55 | 28 | --     | --          |
|            | Ca(ICC2/PI489777)SNP_03999 | 1640 | A | C | 54 | 23 | --     | --          |
|            | Ca(ICC2/PI489777)SNP_04000 | 1647 | G | C | 53 | 25 | --     | --          |
|            | Ca(ICC2/PI489777)SNP_04001 | 1873 | T | C | 57 | 25 | --     | --          |
|            | Ca(ICC2/PI489777)SNP_04002 | 2113 | T | C | 40 | 32 | --     | --          |
|            | Ca(ICC2/PI489777)SNP_04003 | 2233 | T | C | 41 | 31 | --     | --          |
|            | Ca(ICC2/PI489777)SNP_04004 | 2923 | C | T | 30 | 24 | --     | --          |
| CakTC08312 | Ca(ICC2/PI489777)SNP_04005 | 1540 | T | C | 4  | 3  | --     | --          |
|            | Ca(ICC2/PI489777)SNP_04006 | 1615 | G | A | 4  | 3  | --     | --          |
| CakTC27032 | Ca(ICC2/PI489777)SNP_04007 | 1140 | C | G | 3  | 4  | Flower | bud         |
| CakTC35431 | Ca(ICC2/PI489777)SNP_04008 | 502  | C | T | 5  | 3  | --     | MYB-related |
|            | Ca(ICC2/PI489777)SNP_04009 | 1810 | A | G | 9  | 6  | --     | MYB-related |
|            | Ca(ICC2/PI489777)SNP_04010 | 2002 | T | A | 4  | 6  | --     | MYB-related |
|            | Ca(ICC2/PI489777)SNP_04011 | 2049 | T | C | 5  | 5  | --     | MYB-related |
| CakTC38779 | Ca(ICC2/PI489777)SNP_04012 | 189  | A | C | 8  | 5  | --     | --          |
|            | Ca(ICC2/PI489777)SNP_04013 | 340  | C | T | 13 | 12 | --     | --          |
|            | Ca(ICC2/PI489777)SNP_04014 | 427  | A | G | 13 | 13 | --     | --          |
|            | Ca(ICC2/PI489777)SNP_04015 | 670  | C | T | 13 | 11 | --     | --          |
| CakTC26077 | Ca(ICC2/PI489777)SNP_04016 | 1370 | T | A | 3  | 3  | Flower | bud         |
|            | Ca(ICC2/PI489777)SNP_04017 | 2159 | T | G | 5  | 4  | Flower | bud         |
| CakTC08278 | Ca(ICC2/PI489777)SNP_04018 | 215  | C | T | 4  | 4  | --     | --          |
| CakTC35553 | Ca(ICC2/PI489777)SNP_04019 | 724  | C | T | 12 | 15 | --     | --          |
|            | Ca(ICC2/PI489777)SNP_04020 | 1036 | A | C | 14 | 16 | --     | --          |
|            | Ca(ICC2/PI489777)SNP_04021 | 1459 | A | G | 14 | 10 | --     | --          |
|            | Ca(ICC2/PI489777)SNP_04022 | 1541 | C | T | 16 | 9  | --     | --          |
|            | Ca(ICC2/PI489777)SNP_04023 | 1750 | T | C | 18 | 7  | --     | --          |
|            | Ca(ICC2/PI489777)SNP_04024 | 1762 | G | A | 18 | 5  | --     | --          |
|            | Ca(ICC2/PI489777)SNP_04025 | 2311 | G | A | 28 | 10 | --     | --          |
|            | Ca(ICC2/PI489777)SNP_04026 | 2461 | G | A | 29 | 18 | --     | --          |
|            | Ca(ICC2/PI489777)SNP_04027 | 2674 | A | T | 37 | 11 | --     | --          |
|            | Ca(ICC2/PI489777)SNP_04028 | 4043 | T | C | 4  | 3  | --     | --          |
| CakTC27272 | Ca(ICC2/PI489777)SNP_04029 | 176  | G | A | 24 | 8  | --     | --          |
|            | Ca(ICC2/PI489777)SNP_04030 | 399  | C | G | 45 | 22 | --     | --          |
|            | Ca(ICC2/PI489777)SNP_04031 | 525  | A | T | 43 | 25 | --     | --          |
|            | Ca(ICC2/PI489777)SNP_04032 | 584  | C | T | 40 | 19 | --     | --          |
|            | Ca(ICC2/PI489777)SNP_04033 | 615  | C | T | 27 | 17 | --     | --          |
|            | Ca(ICC2/PI489777)SNP_04034 | 984  | G | A | 21 | 10 | --     | --          |
| CakTC32718 | Ca(ICC2/PI489777)SNP_04035 | 325  | C | A | 44 | 19 | --     | --          |
|            | Ca(ICC2/PI489777)SNP_04036 | 460  | C | A | 40 | 19 | --     | --          |
| CakTC32473 | Ca(ICC2/PI489777)SNP_04037 | 330  | T | G | 5  | 15 | --     | --          |
| CakTC11389 | Ca(ICC2/PI489777)SNP_04038 | 337  | T | C | 8  | 3  | --     | --          |
|            | Ca(ICC2/PI489777)SNP_04039 | 1435 | C | G | 18 | 9  | --     | --          |
| CakTC28635 | Ca(ICC2/PI489777)SNP_04040 | 1114 | T | C | 26 | 15 | --     | --          |
|            | Ca(ICC2/PI489777)SNP_04041 | 1363 | G | A | 27 | 4  | --     | --          |
|            | Ca(ICC2/PI489777)SNP_04042 | 1447 | T | C | 14 | 7  | --     | --          |
|            | Ca(ICC2/PI489777)SNP_04043 | 1843 | A | G | 15 | 8  | --     | --          |
|            | Ca(ICC2/PI489777)SNP_04044 | 2014 | A | G | 16 | 9  | --     | --          |
|            | Ca(ICC2/PI489777)SNP_04045 | 2100 | A | G | 20 | 10 | --     | --          |
|            | Ca(ICC2/PI489777)SNP_04046 | 2332 | A | C | 24 | 12 | --     | --          |
|            | Ca(ICC2/PI489777)SNP_04047 | 2353 | G | A | 23 | 13 | --     | --          |
|            | Ca(ICC2/PI489777)SNP_04048 | 2406 | G | A | 21 | 12 | --     | --          |
|            | Ca(ICC2/PI489777)SNP_04049 | 2570 | G | A | 4  | 5  | --     | --          |
| CakTC36725 | Ca(ICC2/PI489777)SNP_04050 | 251  | T | C | 3  | 4  | --     | --          |
|            | Ca(ICC2/PI489777)SNP_04051 | 385  | T | G | 3  | 4  | --     | --          |
| CakTC31469 | Ca(ICC2/PI489777)SNP_04052 | 405  | A | G | 5  | 3  | --     | --          |
|            | Ca(ICC2/PI489777)SNP_04053 | 1334 | T | G | 5  | 8  | --     | --          |
|            | Ca(ICC2/PI489777)SNP_04054 | 1586 | C | T | 3  | 4  | --     | --          |
| CakTC38605 | Ca(ICC2/PI489777)SNP_04055 | 245  | A | C | 18 | 7  | --     | --          |
|            | Ca(ICC2/PI489777)SNP_04056 | 854  | G | A | 8  | 8  | --     | --          |
|            | Ca(ICC2/PI489777)SNP_04057 | 983  | A | G | 4  | 8  | --     | --          |
| CakTC22556 | Ca(ICC2/PI489777)SNP_04058 | 117  | G | T | 5  | 4  | Flower | bud         |
| CakTC09855 | Ca(ICC2/PI489777)SNP_04059 | 248  | T | C | 6  | 8  | --     | --          |
|            | Ca(ICC2/PI489777)SNP_04060 | 2179 | A | G | 5  | 9  | --     | --          |
|            | Ca(ICC2/PI489777)SNP_04061 | 2935 | A | G | 6  | 3  | --     | --          |
| CakTC27650 | Ca(ICC2/PI489777)SNP_04062 | 579  | C | T | 15 | 4  | --     | --          |
|            | Ca(ICC2/PI489777)SNP_04063 | 694  | T | A | 8  | 3  | --     | --          |
|            | Ca(ICC2/PI489777)SNP_04064 | 712  | A | G | 7  | 3  | --     | --          |
|            | Ca(ICC2/PI489777)SNP_04065 | 875  | A | G | 4  | 3  | --     | --          |

|            |                            |      |   |   |     |    |    |      |
|------------|----------------------------|------|---|---|-----|----|----|------|
|            | Ca(ICC2/PI489777)SNP_04066 | 1733 | G | A | 11  | 20 | -- | --   |
|            | Ca(ICC2/PI489777)SNP_04067 | 1940 | T | C | 10  | 8  | -- | --   |
| CakTC02409 | Ca(ICC2/PI489777)SNP_04068 | 838  | T | C | 8   | 3  | -- | --   |
|            | Ca(ICC2/PI489777)SNP_04069 | 998  | G | A | 6   | 5  | -- | --   |
|            | Ca(ICC2/PI489777)SNP_04070 | 1076 | G | A | 5   | 4  | -- | --   |
| CakTC29877 | Ca(ICC2/PI489777)SNP_04071 | 728  | C | G | 5   | 4  | -- | --   |
|            | Ca(ICC2/PI489777)SNP_04072 | 827  | G | A | 5   | 6  | -- | --   |
|            | Ca(ICC2/PI489777)SNP_04073 | 869  | T | C | 6   | 6  | -- | --   |
|            | Ca(ICC2/PI489777)SNP_04074 | 878  | C | T | 7   | 6  | -- | --   |
|            | Ca(ICC2/PI489777)SNP_04075 | 887  | T | C | 6   | 6  | -- | --   |
|            | Ca(ICC2/PI489777)SNP_04076 | 1058 | C | T | 12  | 10 | -- | --   |
|            | Ca(ICC2/PI489777)SNP_04077 | 1103 | C | T | 14  | 10 | -- | --   |
|            | Ca(ICC2/PI489777)SNP_04078 | 1190 | C | A | 14  | 9  | -- | --   |
|            | Ca(ICC2/PI489777)SNP_04079 | 2088 | G | A | 5   | 3  | -- | --   |
| CakTC26750 | Ca(ICC2/PI489777)SNP_04080 | 212  | G | A | 4   | 3  | -- | --   |
|            | Ca(ICC2/PI489777)SNP_04081 | 324  | A | C | 4   | 3  | -- | --   |
| CakTC38978 | Ca(ICC2/PI489777)SNP_04082 | 803  | G | A | 25  | 11 | -- | --   |
|            | Ca(ICC2/PI489777)SNP_04083 | 823  | A | T | 30  | 15 | -- | --   |
|            | Ca(ICC2/PI489777)SNP_04084 | 854  | T | C | 35  | 15 | -- | --   |
|            | Ca(ICC2/PI489777)SNP_04085 | 937  | A | G | 34  | 11 | -- | --   |
|            | Ca(ICC2/PI489777)SNP_04086 | 985  | G | T | 28  | 10 | -- | --   |
|            | Ca(ICC2/PI489777)SNP_04087 | 1092 | C | T | 10  | 4  | -- | --   |
| CakTC33077 | Ca(ICC2/PI489777)SNP_04088 | 24   | T | A | 4   | 5  | -- | --   |
| CakTC41863 | Ca(ICC2/PI489777)SNP_04089 | 208  | T | C | 4   | 4  | -- | --   |
|            | Ca(ICC2/PI489777)SNP_04090 | 766  | G | A | 6   | 4  | -- | --   |
| CakTC12897 | Ca(ICC2/PI489777)SNP_04091 | 70   | C | T | 15  | 22 | -- | --   |
|            | Ca(ICC2/PI489777)SNP_04092 | 870  | T | C | 26  | 14 | -- | --   |
|            | Ca(ICC2/PI489777)SNP_04093 | 958  | C | G | 10  | 5  | -- | --   |
| CakTC27686 | Ca(ICC2/PI489777)SNP_04094 | 193  | G | A | 14  | 10 | -- | --   |
|            | Ca(ICC2/PI489777)SNP_04095 | 269  | G | A | 17  | 16 | -- | --   |
|            | Ca(ICC2/PI489777)SNP_04096 | 348  | C | T | 19  | 15 | -- | --   |
|            | Ca(ICC2/PI489777)SNP_04097 | 418  | G | A | 20  | 15 | -- | --   |
| CakTC37296 | Ca(ICC2/PI489777)SNP_04098 | 223  | A | C | 21  | 31 | -- | --   |
|            | Ca(ICC2/PI489777)SNP_04099 | 230  | C | T | 21  | 29 | -- | --   |
| CakTC40401 | Ca(ICC2/PI489777)SNP_04100 | 837  | C | A | 16  | 9  | -- | --   |
|            | Ca(ICC2/PI489777)SNP_04101 | 959  | A | T | 16  | 8  | -- | --   |
|            | Ca(ICC2/PI489777)SNP_04102 | 974  | G | A | 15  | 9  | -- | --   |
|            | Ca(ICC2/PI489777)SNP_04103 | 1127 | C | G | 12  | 13 | -- | --   |
|            | Ca(ICC2/PI489777)SNP_04104 | 1556 | C | T | 9   | 9  | -- | --   |
|            | Ca(ICC2/PI489777)SNP_04105 | 1647 | A | C | 10  | 12 | -- | --   |
|            | Ca(ICC2/PI489777)SNP_04106 | 1956 | A | C | 8   | 4  | -- | --   |
| CakTC43026 | Ca(ICC2/PI489777)SNP_04107 | 1432 | C | T | 13  | 17 | -- | --   |
| CakTC33827 | Ca(ICC2/PI489777)SNP_04108 | 56   | G | C | 3   | 3  | -- | --   |
|            | Ca(ICC2/PI489777)SNP_04109 | 183  | G | A | 22  | 12 | -- | --   |
|            | Ca(ICC2/PI489777)SNP_04110 | 205  | G | C | 24  | 13 | -- | --   |
|            | Ca(ICC2/PI489777)SNP_04111 | 784  | G | A | 14  | 6  | -- | --   |
| CakTC34070 | Ca(ICC2/PI489777)SNP_04112 | 292  | C | T | 61  | 40 | -- | --   |
|            | Ca(ICC2/PI489777)SNP_04113 | 1753 | C | A | 70  | 59 | -- | --   |
| CakTC37044 | Ca(ICC2/PI489777)SNP_04114 | 1586 | T | C | 18  | 16 | -- | --   |
| CakTC41765 | Ca(ICC2/PI489777)SNP_04115 | 617  | A | T | 8   | 11 | -- | --   |
| CakTC18105 | Ca(ICC2/PI489777)SNP_04116 | 244  | G | A | 15  | 4  | -- | --   |
|            | Ca(ICC2/PI489777)SNP_04117 | 434  | G | C | 25  | 3  | -- | --   |
|            | Ca(ICC2/PI489777)SNP_04118 | 909  | G | C | 22  | 12 | -- | --   |
|            | Ca(ICC2/PI489777)SNP_04119 | 1085 | T | G | 9   | 4  | -- | --   |
| CakTC24222 | Ca(ICC2/PI489777)SNP_04120 | 1327 | C | T | 106 | 20 | -- | --   |
|            | Ca(ICC2/PI489777)SNP_04121 | 1495 | A | G | 136 | 11 | -- | --   |
| CakTC26326 | Ca(ICC2/PI489777)SNP_04122 | 55   | C | G | 4   | 3  | -- | --   |
| CakTC27308 | Ca(ICC2/PI489777)SNP_04123 | 199  | G | C | 11  | 11 | -- | --   |
| CakTC27302 | Ca(ICC2/PI489777)SNP_04124 | 33   | C | A | 4   | 4  | -- | --   |
|            | Ca(ICC2/PI489777)SNP_04125 | 79   | A | C | 5   | 7  | -- | --   |
|            | Ca(ICC2/PI489777)SNP_04126 | 80   | A | G | 5   | 7  | -- | --   |
|            | Ca(ICC2/PI489777)SNP_04127 | 98   | C | T | 5   | 8  | -- | --   |
| CakTC36965 | Ca(ICC2/PI489777)SNP_04128 | 1468 | T | G | 11  | 3  | -- | --   |
| CakTC33037 | Ca(ICC2/PI489777)SNP_04129 | 461  | G | A | 4   | 3  | -- | --   |
|            | Ca(ICC2/PI489777)SNP_04130 | 839  | G | A | 3   | 5  | -- | --   |
| CakTC10278 | Ca(ICC2/PI489777)SNP_04131 | 702  | A | G | 5   | 6  | -- | --   |
|            | Ca(ICC2/PI489777)SNP_04132 | 1973 | T | C | 6   | 8  | -- | --   |
|            | Ca(ICC2/PI489777)SNP_04133 | 1991 | A | G | 6   | 5  | -- | --   |
| CakTC28546 | Ca(ICC2/PI489777)SNP_04134 | 170  | A | G | 13  | 8  | -- | Tify |
|            | Ca(ICC2/PI489777)SNP_04135 | 299  | A | G | 20  | 13 | -- | Tify |
|            | Ca(ICC2/PI489777)SNP_04136 | 453  | A | G | 28  | 9  | -- | Tify |
|            | Ca(ICC2/PI489777)SNP_04137 | 454  | G | C | 29  | 9  | -- | Tify |
|            | Ca(ICC2/PI489777)SNP_04138 | 585  | G | T | 30  | 11 | -- | Tify |
|            | Ca(ICC2/PI489777)SNP_04139 | 616  | C | T | 30  | 13 | -- | Tify |



|            |                            |      |   |   |    |    |       |          |
|------------|----------------------------|------|---|---|----|----|-------|----------|
|            | Ca(ICC2/PI489777)SNP_04140 | 1111 | C | G | 28 | 16 | --    | Tify     |
|            | Ca(ICC2/PI489777)SNP_04141 | 1185 | G | A | 31 | 17 | --    | Tify     |
| CakTC34574 | Ca(ICC2/PI489777)SNP_04142 | 1274 | A | G | 21 | 15 | --    | --       |
|            | Ca(ICC2/PI489777)SNP_04143 | 1454 | G | C | 27 | 11 | --    | --       |
|            | Ca(ICC2/PI489777)SNP_04144 | 1505 | T | C | 31 | 13 | --    | --       |
|            | Ca(ICC2/PI489777)SNP_04145 | 1554 | G | A | 27 | 9  | --    | --       |
|            | Ca(ICC2/PI489777)SNP_04146 | 1626 | T | A | 27 | 12 | --    | --       |
|            | Ca(ICC2/PI489777)SNP_04147 | 1707 | C | T | 24 | 15 | --    | --       |
|            | Ca(ICC2/PI489777)SNP_04148 | 1719 | C | T | 23 | 15 | --    | --       |
|            | Ca(ICC2/PI489777)SNP_04149 | 1723 | A | T | 23 | 16 | --    | --       |
|            | Ca(ICC2/PI489777)SNP_04150 | 1749 | C | T | 22 | 16 | --    | --       |
|            | Ca(ICC2/PI489777)SNP_04151 | 2106 | A | G | 13 | 9  | --    | --       |
|            | Ca(ICC2/PI489777)SNP_04152 | 2181 | C | G | 12 | 5  | --    | --       |
|            | Ca(ICC2/PI489777)SNP_04153 | 2433 | A | G | 10 | 10 | --    | --       |
|            | Ca(ICC2/PI489777)SNP_04154 | 2652 | C | T | 8  | 4  | --    | --       |
|            | Ca(ICC2/PI489777)SNP_04155 | 2715 | A | G | 5  | 7  | --    | --       |
| CakTC38483 | Ca(ICC2/PI489777)SNP_04156 | 790  | A | G | 6  | 4  | --    | --       |
| CakTC37332 | Ca(ICC2/PI489777)SNP_04157 | 366  | T | G | 10 | 8  | --    | --       |
|            | Ca(ICC2/PI489777)SNP_04158 | 1443 | A | C | 12 | 3  | --    | --       |
| CakTC29619 | Ca(ICC2/PI489777)SNP_04159 | 14   | G | T | 6  | 3  | --    | --       |
|            | Ca(ICC2/PI489777)SNP_04160 | 493  | C | T | 14 | 14 | --    | --       |
|            | Ca(ICC2/PI489777)SNP_04161 | 703  | A | G | 22 | 7  | --    | --       |
|            | Ca(ICC2/PI489777)SNP_04162 | 806  | T | C | 30 | 14 | --    | --       |
|            | Ca(ICC2/PI489777)SNP_04163 | 849  | A | G | 28 | 13 | --    | --       |
|            | Ca(ICC2/PI489777)SNP_04164 | 850  | A | G | 28 | 13 | --    | --       |
|            | Ca(ICC2/PI489777)SNP_04165 | 875  | A | G | 24 | 14 | --    | --       |
|            | Ca(ICC2/PI489777)SNP_04166 | 879  | A | G | 24 | 14 | --    | --       |
|            | Ca(ICC2/PI489777)SNP_04167 | 954  | G | T | 15 | 3  | --    | --       |
| CakTC37916 | Ca(ICC2/PI489777)SNP_04168 | 440  | T | C | 9  | 10 | --    | --       |
|            | Ca(ICC2/PI489777)SNP_04169 | 476  | G | T | 8  | 7  | --    | --       |
| CakTC25838 | Ca(ICC2/PI489777)SNP_04170 | 709  | G | T | 11 | 4  | --    | --       |
| CakTC26293 | Ca(ICC2/PI489777)SNP_04171 | 884  | A | G | 48 | 21 | --    | --       |
| CakTC25797 | Ca(ICC2/PI489777)SNP_04172 | 898  | A | G | 15 | 8  | --    | --       |
|            | Ca(ICC2/PI489777)SNP_04173 | 1498 | T | G | 6  | 3  | --    | --       |
|            | Ca(ICC2/PI489777)SNP_04174 | 2369 | C | T | 10 | 8  | --    | --       |
|            | Ca(ICC2/PI489777)SNP_04175 | 2686 | A | C | 11 | 8  | --    | --       |
|            | Ca(ICC2/PI489777)SNP_04176 | 3468 | T | C | 8  | 4  | --    | --       |
|            | Ca(ICC2/PI489777)SNP_04177 | 5226 | T | C | 6  | 4  | --    | --       |
|            | Ca(ICC2/PI489777)SNP_04178 | 6373 | G | A | 4  | 4  | --    | --       |
| CakTC36446 | Ca(ICC2/PI489777)SNP_04179 | 174  | C | G | 3  | 3  | --    | --       |
|            | Ca(ICC2/PI489777)SNP_04180 | 298  | C | A | 3  | 3  | --    | --       |
| CakTC39159 | Ca(ICC2/PI489777)SNP_04181 | 1434 | A | G | 10 | 6  | --    | bZIP     |
| CakTC39212 | Ca(ICC2/PI489777)SNP_04182 | 1061 | A | T | 20 | 6  | --    | --       |
| CakTC40888 | Ca(ICC2/PI489777)SNP_04183 | 366  | A | G | 40 | 39 | --    | --       |
| CakTC37396 | Ca(ICC2/PI489777)SNP_04184 | 87   | G | C | 4  | 3  | --    | TPR      |
|            | Ca(ICC2/PI489777)SNP_04185 | 187  | C | A | 19 | 10 | --    | TPR      |
| CakTC37504 | Ca(ICC2/PI489777)SNP_04186 | 303  | G | A | 10 | 3  | --    | --       |
| CakTC29088 | Ca(ICC2/PI489777)SNP_04187 | 302  | A | T | 10 | 3  | --    | --       |
| CakTC39271 | Ca(ICC2/PI489777)SNP_04188 | 372  | A | T | 10 | 22 | --    | --       |
|            | Ca(ICC2/PI489777)SNP_04189 | 374  | G | T | 9  | 21 | --    | --       |
|            | Ca(ICC2/PI489777)SNP_04190 | 536  | A | G | 9  | 14 | --    | --       |
|            | Ca(ICC2/PI489777)SNP_04191 | 893  | T | C | 13 | 12 | --    | --       |
|            | Ca(ICC2/PI489777)SNP_04192 | 1142 | C | G | 9  | 14 | --    | --       |
|            | Ca(ICC2/PI489777)SNP_04193 | 1297 | A | G | 7  | 8  | --    | --       |
|            | Ca(ICC2/PI489777)SNP_04194 | 1372 | T | C | 8  | 6  | --    | --       |
| CakTC41929 | Ca(ICC2/PI489777)SNP_04195 | 164  | G | A | 9  | 8  | --    | --       |
| CakTC42400 | Ca(ICC2/PI489777)SNP_04196 | 511  | A | G | 10 | 5  | --    | TUB      |
|            | Ca(ICC2/PI489777)SNP_04197 | 1060 | T | C | 24 | 10 | --    | TUB      |
|            | Ca(ICC2/PI489777)SNP_04198 | 1180 | T | C | 20 | 12 | --    | TUB      |
| CakTC10225 | Ca(ICC2/PI489777)SNP_04199 | 519  | C | G | 9  | 11 | --    | --       |
|            | Ca(ICC2/PI489777)SNP_04200 | 1011 | G | T | 9  | 5  | --    | --       |
| CakTC33169 | Ca(ICC2/PI489777)SNP_04201 | 1253 | A | G | 12 | 5  | --    | --       |
|            | Ca(ICC2/PI489777)SNP_04202 | 1867 | T | G | 4  | 3  | --    | --       |
| CakTC23640 | Ca(ICC2/PI489777)SNP_04203 | 111  | T | C | 31 | 11 | --    | --       |
| CakTC15471 | Ca(ICC2/PI489777)SNP_04204 | 354  | T | A | 8  | 11 | Shoot | --       |
|            | Ca(ICC2/PI489777)SNP_04205 | 487  | A | G | 5  | 4  | Shoot | --       |
|            | Ca(ICC2/PI489777)SNP_04206 | 524  | A | G | 5  | 6  | Shoot | --       |
| CakTC36055 | Ca(ICC2/PI489777)SNP_04207 | 2001 | A | G | 6  | 4  | --    | --       |
|            | Ca(ICC2/PI489777)SNP_04208 | 2452 | T | A | 8  | 4  | --    | --       |
| CakTC11612 | Ca(ICC2/PI489777)SNP_04209 | 73   | C | T | 32 | 13 | --    | --       |
|            | Ca(ICC2/PI489777)SNP_04210 | 196  | T | C | 51 | 38 | --    | --       |
|            | Ca(ICC2/PI489777)SNP_04211 | 885  | G | C | 27 | 37 | --    | --       |
| CakTC32565 | Ca(ICC2/PI489777)SNP_04212 | 173  | A | G | 6  | 3  | --    | --       |
| CakTC34287 | Ca(ICC2/PI489777)SNP_04213 | 681  | A | C | 3  | 4  | --    | C2C2-Dof |

|            |                            |      |   |   |     |     |      |          |
|------------|----------------------------|------|---|---|-----|-----|------|----------|
|            | Ca(ICC2/PI489777)SNP_04214 | 694  | A | T | 3   | 3   | --   | C2C2-Dof |
| CakTC38119 | Ca(ICC2/PI489777)SNP_04215 | 507  | T | C | 19  | 8   | --   | --       |
|            | Ca(ICC2/PI489777)SNP_04216 | 626  | C | G | 25  | 9   | --   | --       |
| CakTC29191 | Ca(ICC2/PI489777)SNP_04217 | 247  | A | C | 23  | 9   | --   | --       |
|            | Ca(ICC2/PI489777)SNP_04218 | 640  | A | G | 13  | 7   | --   | --       |
|            | Ca(ICC2/PI489777)SNP_04219 | 913  | A | G | 17  | 8   | --   | --       |
|            | Ca(ICC2/PI489777)SNP_04220 | 943  | C | T | 13  | 10  | --   | --       |
|            | Ca(ICC2/PI489777)SNP_04221 | 1003 | C | T | 16  | 9   | --   | --       |
|            | Ca(ICC2/PI489777)SNP_04222 | 1018 | G | A | 12  | 8   | --   | --       |
| CakTC31872 | Ca(ICC2/PI489777)SNP_04223 | 1332 | A | G | 7   | 5   | --   | --       |
|            | Ca(ICC2/PI489777)SNP_04224 | 3287 | A | T | 3   | 14  | --   | --       |
|            | Ca(ICC2/PI489777)SNP_04225 | 3347 | G | A | 4   | 9   | --   | --       |
| CakTC42407 | Ca(ICC2/PI489777)SNP_04226 | 83   | A | T | 28  | 29  | --   | --       |
|            | Ca(ICC2/PI489777)SNP_04227 | 165  | C | T | 30  | 29  | --   | --       |
|            | Ca(ICC2/PI489777)SNP_04228 | 222  | T | C | 37  | 32  | --   | --       |
|            | Ca(ICC2/PI489777)SNP_04229 | 234  | A | G | 37  | 39  | --   | --       |
|            | Ca(ICC2/PI489777)SNP_04230 | 307  | A | G | 38  | 37  | --   | --       |
|            | Ca(ICC2/PI489777)SNP_04231 | 315  | C | T | 38  | 36  | --   | --       |
|            | Ca(ICC2/PI489777)SNP_04232 | 1146 | C | T | 26  | 28  | --   | --       |
| CakTC33327 | Ca(ICC2/PI489777)SNP_04233 | 1304 | G | T | 3   | 4   | --   | --       |
| CakTC24913 | Ca(ICC2/PI489777)SNP_04234 | 993  | A | T | 7   | 4   | --   | --       |
|            | Ca(ICC2/PI489777)SNP_04235 | 1117 | A | T | 4   | 5   | --   | --       |
|            | Ca(ICC2/PI489777)SNP_04236 | 1291 | C | T | 15  | 3   | --   | --       |
|            | Ca(ICC2/PI489777)SNP_04237 | 1576 | A | G | 3   | 4   | --   | --       |
|            | Ca(ICC2/PI489777)SNP_04238 | 1583 | T | C | 3   | 3   | --   | --       |
| CakTC30938 | Ca(ICC2/PI489777)SNP_04239 | 138  | A | G | 49  | 26  | --   | --       |
|            | Ca(ICC2/PI489777)SNP_04240 | 291  | T | C | 51  | 39  | --   | --       |
|            | Ca(ICC2/PI489777)SNP_04241 | 805  | G | A | 35  | 19  | --   | --       |
| CakTC35199 | Ca(ICC2/PI489777)SNP_04242 | 1494 | C | T | 38  | 37  | --   | --       |
| CakTC42473 | Ca(ICC2/PI489777)SNP_04243 | 140  | C | T | 7   | 4   | --   | --       |
|            | Ca(ICC2/PI489777)SNP_04244 | 142  | T | C | 7   | 4   | --   | --       |
|            | Ca(ICC2/PI489777)SNP_04245 | 397  | A | G | 8   | 4   | --   | --       |
| CakTC41270 | Ca(ICC2/PI489777)SNP_04246 | 417  | T | C | 7   | 3   | --   | --       |
|            | Ca(ICC2/PI489777)SNP_04247 | 588  | T | C | 4   | 4   | --   | --       |
|            | Ca(ICC2/PI489777)SNP_04248 | 636  | T | C | 5   | 4   | --   | --       |
|            | Ca(ICC2/PI489777)SNP_04249 | 1188 | G | C | 6   | 3   | --   | --       |
| CakTC42430 | Ca(ICC2/PI489777)SNP_04250 | 377  | C | T | 16  | 12  | --   | --       |
|            | Ca(ICC2/PI489777)SNP_04251 | 668  | C | A | 23  | 14  | --   | --       |
|            | Ca(ICC2/PI489777)SNP_04252 | 734  | A | G | 17  | 10  | --   | --       |
|            | Ca(ICC2/PI489777)SNP_04253 | 1514 | A | G | 15  | 12  | --   | --       |
| CakTC10422 | Ca(ICC2/PI489777)SNP_04254 | 144  | T | C | 22  | 29  | --   | --       |
| CakTC36570 | Ca(ICC2/PI489777)SNP_04255 | 374  | A | G | 23  | 22  | --   | CCHC     |
|            | Ca(ICC2/PI489777)SNP_04256 | 420  | T | A | 25  | 24  | --   | CCHC     |
|            | Ca(ICC2/PI489777)SNP_04257 | 473  | G | T | 26  | 24  | --   | CCHC     |
|            | Ca(ICC2/PI489777)SNP_04258 | 1286 | T | G | 73  | 22  | --   | CCHC     |
|            | Ca(ICC2/PI489777)SNP_04259 | 2588 | C | T | 14  | 8   | --   | CCHC     |
|            | Ca(ICC2/PI489777)SNP_04260 | 2646 | G | A | 10  | 6   | --   | CCHC     |
| CakTC24908 | Ca(ICC2/PI489777)SNP_04261 | 426  | A | G | 5   | 3   | --   | --       |
|            | Ca(ICC2/PI489777)SNP_04262 | 529  | A | G | 6   | 5   | --   | --       |
|            | Ca(ICC2/PI489777)SNP_04263 | 570  | C | T | 9   | 5   | --   | --       |
|            | Ca(ICC2/PI489777)SNP_04264 | 585  | A | C | 10  | 5   | --   | --       |
|            | Ca(ICC2/PI489777)SNP_04265 | 592  | T | C | 9   | 5   | --   | --       |
|            | Ca(ICC2/PI489777)SNP_04266 | 599  | G | A | 10  | 5   | --   | --       |
|            | Ca(ICC2/PI489777)SNP_04267 | 609  | A | G | 10  | 5   | --   | --       |
| CakTC31476 | Ca(ICC2/PI489777)SNP_04268 | 485  | A | G | 4   | 3   | --   | --       |
|            | Ca(ICC2/PI489777)SNP_04269 | 924  | G | A | 6   | 3   | --   | --       |
| CakTC32763 | Ca(ICC2/PI489777)SNP_04270 | 97   | C | T | 36  | 17  | --   | --       |
|            | Ca(ICC2/PI489777)SNP_04271 | 260  | A | T | 31  | 15  | --   | --       |
|            | Ca(ICC2/PI489777)SNP_04272 | 287  | C | G | 25  | 14  | --   | --       |
|            | Ca(ICC2/PI489777)SNP_04273 | 378  | T | G | 21  | 14  | --   | --       |
| CakTC37246 | Ca(ICC2/PI489777)SNP_04274 | 131  | C | T | 111 | 106 | --   | --       |
|            | Ca(ICC2/PI489777)SNP_04275 | 464  | T | C | 111 | 117 | --   | --       |
|            | Ca(ICC2/PI489777)SNP_04276 | 521  | C | T | 107 | 106 | --   | --       |
|            | Ca(ICC2/PI489777)SNP_04277 | 584  | T | G | 116 | 101 | --   | --       |
| CakTC05800 | Ca(ICC2/PI489777)SNP_04278 | 2310 | G | T | 18  | 21  | --   | --       |
|            | Ca(ICC2/PI489777)SNP_04279 | 2353 | G | A | 13  | 20  | --   | --       |
| CakTC32123 | Ca(ICC2/PI489777)SNP_04280 | 613  | A | T | 3   | 14  | Root | bHLH     |
|            | Ca(ICC2/PI489777)SNP_04281 | 662  | C | T | 3   | 11  | Root | bHLH     |
|            | Ca(ICC2/PI489777)SNP_04282 | 664  | A | C | 3   | 12  | Root | bHLH     |
| CakTC38167 | Ca(ICC2/PI489777)SNP_04283 | 335  | C | A | 9   | 5   | --   | --       |
|            | Ca(ICC2/PI489777)SNP_04284 | 551  | A | C | 8   | 3   | --   | --       |
|            | Ca(ICC2/PI489777)SNP_04285 | 635  | G | T | 6   | 4   | --   | --       |
|            | Ca(ICC2/PI489777)SNP_04286 | 801  | T | C | 10  | 5   | --   | --       |
|            | Ca(ICC2/PI489777)SNP_04287 | 1194 | G | A | 8   | 14  | --   | --       |

|            |                             |      |   |   |     |    |           |          |
|------------|-----------------------------|------|---|---|-----|----|-----------|----------|
|            | Ca(ICCV2/PI489777)SNP_04288 | 1229 | A | C | 10  | 12 | --        | --       |
| CakTC25343 | Ca(ICCV2/PI489777)SNP_04289 | 586  | C | T | 26  | 6  | --        | --       |
|            | Ca(ICCV2/PI489777)SNP_04290 | 1036 | G | A | 36  | 12 | --        | --       |
|            | Ca(ICCV2/PI489777)SNP_04291 | 1211 | G | A | 30  | 14 | --        | --       |
| CakTC11427 | Ca(ICCV2/PI489777)SNP_04292 | 961  | A | T | 26  | 9  | --        | --       |
|            | Ca(ICCV2/PI489777)SNP_04293 | 1018 | G | A | 25  | 8  | --        | --       |
| CakTC24464 | Ca(ICCV2/PI489777)SNP_04294 | 700  | T | A | 35  | 10 | --        | --       |
| CakTC38784 | Ca(ICCV2/PI489777)SNP_04295 | 127  | C | T | 9   | 3  | --        | C2C2-Dof |
|            | Ca(ICCV2/PI489777)SNP_04296 | 220  | G | A | 11  | 4  | --        | C2C2-Dof |
|            | Ca(ICCV2/PI489777)SNP_04297 | 562  | T | C | 4   | 4  | --        | C2C2-Dof |
|            | Ca(ICCV2/PI489777)SNP_04298 | 929  | A | C | 18  | 5  | --        | C2C2-Dof |
| CakTC23299 | Ca(ICCV2/PI489777)SNP_04299 | 340  | G | A | 9   | 10 | --        | --       |
|            | Ca(ICCV2/PI489777)SNP_04300 | 732  | A | T | 8   | 7  | --        | --       |
| CakTC39264 | Ca(ICCV2/PI489777)SNP_04301 | 880  | T | G | 8   | 4  | --        | --       |
| CakTC25602 | Ca(ICCV2/PI489777)SNP_04302 | 278  | T | C | 23  | 24 | --        | --       |
| CakTC43118 | Ca(ICCV2/PI489777)SNP_04303 | 143  | A | T | 5   | 4  | --        | --       |
|            | Ca(ICCV2/PI489777)SNP_04304 | 204  | T | G | 11  | 7  | --        | --       |
|            | Ca(ICCV2/PI489777)SNP_04305 | 622  | A | G | 33  | 21 | --        | --       |
|            | Ca(ICCV2/PI489777)SNP_04306 | 869  | C | A | 23  | 6  | --        | --       |
|            | Ca(ICCV2/PI489777)SNP_04307 | 889  | G | A | 18  | 6  | --        | --       |
|            | Ca(ICCV2/PI489777)SNP_04308 | 901  | T | A | 20  | 5  | --        | --       |
| CakTC30013 | Ca(ICCV2/PI489777)SNP_04309 | 61   | G | C | 4   | 5  | --        | --       |
|            | Ca(ICCV2/PI489777)SNP_04310 | 109  | A | T | 4   | 5  | --        | --       |
|            | Ca(ICCV2/PI489777)SNP_04311 | 422  | A | G | 8   | 4  | --        | --       |
|            | Ca(ICCV2/PI489777)SNP_04312 | 1112 | C | T | 6   | 7  | --        | --       |
|            | Ca(ICCV2/PI489777)SNP_04313 | 1490 | T | C | 9   | 4  | --        | --       |
|            | Ca(ICCV2/PI489777)SNP_04314 | 2235 | G | T | 7   | 3  | --        | --       |
|            | Ca(ICCV2/PI489777)SNP_04315 | 2535 | T | A | 4   | 5  | --        | --       |
| CakTC33983 | Ca(ICCV2/PI489777)SNP_04316 | 579  | A | G | 5   | 7  | --        | --       |
| CakTC34202 | Ca(ICCV2/PI489777)SNP_04317 | 903  | G | A | 11  | 9  | Young_pod | --       |
|            | Ca(ICCV2/PI489777)SNP_04318 | 1401 | G | T | 34  | 10 | Young_pod | --       |
|            | Ca(ICCV2/PI489777)SNP_04319 | 1772 | T | C | 18  | 6  | Young_pod | --       |
|            | Ca(ICCV2/PI489777)SNP_04320 | 2168 | A | G | 4   | 3  | Young_pod | --       |
| CakTC37700 | Ca(ICCV2/PI489777)SNP_04321 | 48   | C | T | 7   | 4  | --        | --       |
|            | Ca(ICCV2/PI489777)SNP_04322 | 841  | T | A | 8   | 6  | --        | --       |
| CakTC41317 | Ca(ICCV2/PI489777)SNP_04323 | 606  | C | A | 56  | 38 | --        | --       |
| CakTC27806 | Ca(ICCV2/PI489777)SNP_04324 | 472  | G | A | 12  | 4  | --        | --       |
|            | Ca(ICCV2/PI489777)SNP_04325 | 530  | G | A | 8   | 8  | --        | --       |
|            | Ca(ICCV2/PI489777)SNP_04326 | 1180 | G | A | 20  | 14 | --        | --       |
| CakTC37810 | Ca(ICCV2/PI489777)SNP_04327 | 1014 | G | T | 49  | 22 | --        | --       |
|            | Ca(ICCV2/PI489777)SNP_04328 | 1015 | T | A | 49  | 19 | --        | --       |
| CakTC24965 | Ca(ICCV2/PI489777)SNP_04329 | 319  | A | G | 65  | 38 | --        | --       |
|            | Ca(ICCV2/PI489777)SNP_04330 | 593  | G | A | 90  | 30 | --        | --       |
|            | Ca(ICCV2/PI489777)SNP_04331 | 979  | C | T | 104 | 38 | --        | --       |
|            | Ca(ICCV2/PI489777)SNP_04332 | 1345 | C | G | 17  | 8  | --        | --       |
|            | Ca(ICCV2/PI489777)SNP_04333 | 1907 | C | T | 25  | 10 | --        | --       |
|            | Ca(ICCV2/PI489777)SNP_04334 | 1925 | A | T | 24  | 11 | --        | --       |
|            | Ca(ICCV2/PI489777)SNP_04335 | 2433 | T | A | 35  | 16 | --        | --       |
|            | Ca(ICCV2/PI489777)SNP_04336 | 2436 | A | G | 37  | 17 | --        | --       |
|            | Ca(ICCV2/PI489777)SNP_04337 | 3025 | G | A | 44  | 18 | --        | --       |
|            | Ca(ICCV2/PI489777)SNP_04338 | 3050 | G | A | 43  | 16 | --        | --       |
|            | Ca(ICCV2/PI489777)SNP_04339 | 3114 | G | T | 38  | 13 | --        | --       |
|            | Ca(ICCV2/PI489777)SNP_04340 | 3185 | A | C | 28  | 12 | --        | --       |
|            | Ca(ICCV2/PI489777)SNP_04341 | 3926 | A | G | 18  | 6  | --        | --       |
|            | Ca(ICCV2/PI489777)SNP_04342 | 4368 | G | T | 38  | 23 | --        | --       |
| CakTC33530 | Ca(ICCV2/PI489777)SNP_04343 | 1276 | G | A | 17  | 10 | --        | --       |
|            | Ca(ICCV2/PI489777)SNP_04344 | 1334 | T | A | 14  | 11 | --        | --       |
| CakTC39620 | Ca(ICCV2/PI489777)SNP_04345 | 390  | T | C | 12  | 13 | --        | --       |
|            | Ca(ICCV2/PI489777)SNP_04346 | 730  | C | T | 14  | 34 | --        | --       |
|            | Ca(ICCV2/PI489777)SNP_04347 | 840  | C | T | 12  | 39 | --        | --       |
|            | Ca(ICCV2/PI489777)SNP_04348 | 853  | G | A | 12  | 34 | --        | --       |
| CakTC10204 | Ca(ICCV2/PI489777)SNP_04349 | 177  | G | A | 3   | 4  | --        | --       |
| CakTC28064 | Ca(ICCV2/PI489777)SNP_04350 | 384  | T | C | 120 | 74 | --        | --       |
|            | Ca(ICCV2/PI489777)SNP_04351 | 768  | C | G | 24  | 7  | --        | --       |
| CakTC10762 | Ca(ICCV2/PI489777)SNP_04352 | 613  | A | G | 25  | 6  | --        | BES1     |
|            | Ca(ICCV2/PI489777)SNP_04353 | 1274 | G | C | 4   | 4  | --        | BES1     |
| CakTC35267 | Ca(ICCV2/PI489777)SNP_04354 | 110  | A | G | 8   | 9  | --        | --       |
|            | Ca(ICCV2/PI489777)SNP_04355 | 141  | A | G | 8   | 7  | --        | --       |
| CakTC22475 | Ca(ICCV2/PI489777)SNP_04356 | 357  | C | T | 3   | 3  | --        | --       |
| CakTC10943 | Ca(ICCV2/PI489777)SNP_04357 | 1145 | A | G | 6   | 5  | --        | --       |
|            | Ca(ICCV2/PI489777)SNP_04358 | 1298 | A | G | 3   | 4  | --        | --       |
| CakTC10353 | Ca(ICCV2/PI489777)SNP_04359 | 651  | A | G | 17  | 4  | --        | HB       |
|            | Ca(ICCV2/PI489777)SNP_04360 | 885  | G | A | 19  | 13 | --        | HB       |
|            | Ca(ICCV2/PI489777)SNP_04361 | 924  | T | C | 19  | 18 | --        | HB       |

|            |                            |      |   |   |    |    |    |    |
|------------|----------------------------|------|---|---|----|----|----|----|
| CakTC34329 | Ca(ICC2/PI489777)SNP_04362 | 76   | A | C | 3  | 10 | -- | -- |
| CakTC36813 | Ca(ICC2/PI489777)SNP_04363 | 261  | C | G | 5  | 6  | -- | -- |
|            | Ca(ICC2/PI489777)SNP_04364 | 492  | G | C | 16 | 4  | -- | -- |
|            | Ca(ICC2/PI489777)SNP_04365 | 1534 | T | G | 15 | 16 | -- | -- |
|            | Ca(ICC2/PI489777)SNP_04366 | 1884 | T | C | 21 | 19 | -- | -- |
|            | Ca(ICC2/PI489777)SNP_04367 | 2073 | G | C | 17 | 8  | -- | -- |
|            | Ca(ICC2/PI489777)SNP_04368 | 2483 | T | C | 6  | 4  | -- | -- |
| CakTC23986 | Ca(ICC2/PI489777)SNP_04369 | 294  | A | C | 14 | 21 | -- | -- |
|            | Ca(ICC2/PI489777)SNP_04370 | 387  | G | T | 23 | 22 | -- | -- |
|            | Ca(ICC2/PI489777)SNP_04371 | 553  | G | T | 44 | 18 | -- | -- |
|            | Ca(ICC2/PI489777)SNP_04372 | 591  | A | G | 45 | 18 | -- | -- |
|            | Ca(ICC2/PI489777)SNP_04373 | 612  | A | T | 41 | 13 | -- | -- |
|            | Ca(ICC2/PI489777)SNP_04374 | 832  | A | C | 16 | 5  | -- | -- |
|            | Ca(ICC2/PI489777)SNP_04375 | 856  | G | A | 17 | 7  | -- | -- |
|            | Ca(ICC2/PI489777)SNP_04376 | 973  | A | G | 19 | 8  | -- | -- |
|            | Ca(ICC2/PI489777)SNP_04377 | 985  | A | G | 21 | 8  | -- | -- |
|            | Ca(ICC2/PI489777)SNP_04378 | 1114 | C | G | 17 | 8  | -- | -- |
|            | Ca(ICC2/PI489777)SNP_04379 | 1126 | G | A | 16 | 6  | -- | -- |
|            | Ca(ICC2/PI489777)SNP_04380 | 1267 | T | C | 20 | 3  | -- | -- |
|            | Ca(ICC2/PI489777)SNP_04381 | 1506 | A | G | 14 | 3  | -- | -- |
|            | Ca(ICC2/PI489777)SNP_04382 | 1671 | G | A | 14 | 4  | -- | -- |
| CakTC43063 | Ca(ICC2/PI489777)SNP_04383 | 693  | T | A | 23 | 10 | -- | -- |
|            | Ca(ICC2/PI489777)SNP_04384 | 1228 | A | C | 38 | 45 | -- | -- |
| CakTC25692 | Ca(ICC2/PI489777)SNP_04385 | 1751 | T | C | 3  | 3  | -- | -- |
| CakTC25909 | Ca(ICC2/PI489777)SNP_04386 | 702  | T | C | 10 | 3  | -- | -- |
| CakTC09540 | Ca(ICC2/PI489777)SNP_04387 | 775  | A | T | 3  | 5  | -- | -- |
| CakTC25183 | Ca(ICC2/PI489777)SNP_04388 | 424  | C | T | 33 | 37 | -- | -- |
|            | Ca(ICC2/PI489777)SNP_04389 | 718  | C | T | 46 | 26 | -- | -- |
|            | Ca(ICC2/PI489777)SNP_04390 | 994  | C | T | 49 | 34 | -- | -- |
| CakTC26351 | Ca(ICC2/PI489777)SNP_04391 | 382  | T | C | 12 | 10 | -- | -- |
|            | Ca(ICC2/PI489777)SNP_04392 | 502  | C | T | 14 | 15 | -- | -- |
|            | Ca(ICC2/PI489777)SNP_04393 | 565  | G | C | 22 | 15 | -- | -- |
|            | Ca(ICC2/PI489777)SNP_04394 | 716  | G | T | 25 | 10 | -- | -- |
|            | Ca(ICC2/PI489777)SNP_04395 | 1128 | G | A | 23 | 5  | -- | -- |
|            | Ca(ICC2/PI489777)SNP_04396 | 1531 | C | T | 10 | 19 | -- | -- |
|            | Ca(ICC2/PI489777)SNP_04397 | 1586 | A | G | 7  | 13 | -- | -- |
|            | Ca(ICC2/PI489777)SNP_04398 | 1675 | A | G | 8  | 11 | -- | -- |
|            | Ca(ICC2/PI489777)SNP_04399 | 1678 | C | T | 8  | 10 | -- | -- |
|            | Ca(ICC2/PI489777)SNP_04400 | 1884 | C | T | 13 | 9  | -- | -- |
|            | Ca(ICC2/PI489777)SNP_04401 | 2324 | T | C | 10 | 5  | -- | -- |
|            | Ca(ICC2/PI489777)SNP_04402 | 2330 | A | G | 10 | 5  | -- | -- |
|            | Ca(ICC2/PI489777)SNP_04403 | 2494 | T | C | 8  | 3  | -- | -- |
|            | Ca(ICC2/PI489777)SNP_04404 | 2648 | G | A | 18 | 4  | -- | -- |
|            | Ca(ICC2/PI489777)SNP_04405 | 2666 | C | A | 18 | 4  | -- | -- |
|            | Ca(ICC2/PI489777)SNP_04406 | 3026 | A | G | 19 | 8  | -- | -- |
|            | Ca(ICC2/PI489777)SNP_04407 | 3351 | C | G | 14 | 9  | -- | -- |
|            | Ca(ICC2/PI489777)SNP_04408 | 4079 | T | C | 6  | 8  | -- | -- |
|            | Ca(ICC2/PI489777)SNP_04409 | 4102 | A | G | 7  | 10 | -- | -- |
|            | Ca(ICC2/PI489777)SNP_04410 | 4289 | T | A | 13 | 10 | -- | -- |
|            | Ca(ICC2/PI489777)SNP_04411 | 4404 | C | T | 14 | 9  | -- | -- |
|            | Ca(ICC2/PI489777)SNP_04412 | 4458 | G | T | 16 | 6  | -- | -- |
|            | Ca(ICC2/PI489777)SNP_04413 | 4474 | C | G | 16 | 5  | -- | -- |
|            | Ca(ICC2/PI489777)SNP_04414 | 4717 | C | G | 7  | 4  | -- | -- |
|            | Ca(ICC2/PI489777)SNP_04415 | 4760 | C | T | 8  | 4  | -- | -- |
|            | Ca(ICC2/PI489777)SNP_04416 | 4832 | T | C | 9  | 8  | -- | -- |
|            | Ca(ICC2/PI489777)SNP_04417 | 5105 | A | G | 11 | 5  | -- | -- |
|            | Ca(ICC2/PI489777)SNP_04418 | 5375 | G | A | 17 | 7  | -- | -- |
|            | Ca(ICC2/PI489777)SNP_04419 | 5403 | A | G | 17 | 4  | -- | -- |
|            | Ca(ICC2/PI489777)SNP_04420 | 5460 | T | G | 8  | 4  | -- | -- |
| CakTC43008 | Ca(ICC2/PI489777)SNP_04421 | 536  | C | T | 29 | 36 | -- | -- |
|            | Ca(ICC2/PI489777)SNP_04422 | 542  | G | T | 29 | 37 | -- | -- |
|            | Ca(ICC2/PI489777)SNP_04423 | 758  | T | C | 32 | 26 | -- | -- |
|            | Ca(ICC2/PI489777)SNP_04424 | 906  | A | G | 45 | 25 | -- | -- |
| CakTC11743 | Ca(ICC2/PI489777)SNP_04425 | 823  | A | C | 3  | 9  | -- | -- |
| CakTC26596 | Ca(ICC2/PI489777)SNP_04426 | 739  | A | T | 12 | 4  | -- | -- |
| CakTC23839 | Ca(ICC2/PI489777)SNP_04427 | 1063 | A | G | 77 | 17 | -- | -- |
|            | Ca(ICC2/PI489777)SNP_04428 | 1209 | T | A | 73 | 13 | -- | -- |
| CakTC27159 | Ca(ICC2/PI489777)SNP_04429 | 335  | T | C | 21 | 7  | -- | -- |
|            | Ca(ICC2/PI489777)SNP_04430 | 347  | A | C | 23 | 8  | -- | -- |
|            | Ca(ICC2/PI489777)SNP_04431 | 350  | A | G | 23 | 8  | -- | -- |
|            | Ca(ICC2/PI489777)SNP_04432 | 359  | T | C | 23 | 8  | -- | -- |
|            | Ca(ICC2/PI489777)SNP_04433 | 362  | C | T | 23 | 8  | -- | -- |
|            | Ca(ICC2/PI489777)SNP_04434 | 440  | T | C | 25 | 9  | -- | -- |
|            | Ca(ICC2/PI489777)SNP_04435 | 470  | G | A | 27 | 10 | -- | -- |

|            |                             |      |   |   |    |    |       |    |
|------------|-----------------------------|------|---|---|----|----|-------|----|
|            | Ca(ICCV2/PI489777)SNP_04436 | 656  | A | G | 23 | 12 | --    | -- |
|            | Ca(ICCV2/PI489777)SNP_04437 | 882  | C | T | 8  | 11 | --    | -- |
|            | Ca(ICCV2/PI489777)SNP_04438 | 1576 | G | C | 25 | 15 | --    | -- |
|            | Ca(ICCV2/PI489777)SNP_04439 | 1578 | T | C | 22 | 15 | --    | -- |
|            | Ca(ICCV2/PI489777)SNP_04440 | 1759 | G | T | 15 | 10 | --    | -- |
| CakTC09147 | Ca(ICCV2/PI489777)SNP_04441 | 1723 | C | T | 4  | 6  | --    | -- |
|            | Ca(ICCV2/PI489777)SNP_04442 | 1782 | A | G | 4  | 9  | --    | -- |
| CakTC39497 | Ca(ICCV2/PI489777)SNP_04443 | 292  | C | G | 5  | 6  | Shoot | -- |
|            | Ca(ICCV2/PI489777)SNP_04444 | 413  | A | G | 7  | 8  | Shoot | -- |
| CakTC22902 | Ca(ICCV2/PI489777)SNP_04445 | 2157 | A | T | 3  | 3  | --    | -- |
|            | Ca(ICCV2/PI489777)SNP_04446 | 2162 | T | C | 3  | 3  | --    | -- |
|            | Ca(ICCV2/PI489777)SNP_04447 | 4239 | C | T | 39 | 5  | --    | -- |
|            | Ca(ICCV2/PI489777)SNP_04448 | 4438 | T | C | 49 | 8  | --    | -- |
| CakTC27313 | Ca(ICCV2/PI489777)SNP_04449 | 2200 | A | T | 25 | 5  | --    | -- |
| CakTC24725 | Ca(ICCV2/PI489777)SNP_04450 | 1417 | G | A | 45 | 44 | --    | -- |
|            | Ca(ICCV2/PI489777)SNP_04451 | 1418 | A | G | 45 | 44 | --    | -- |
| CakTC34160 | Ca(ICCV2/PI489777)SNP_04452 | 1085 | A | G | 14 | 12 | --    | -- |
|            | Ca(ICCV2/PI489777)SNP_04453 | 1249 | A | C | 14 | 13 | --    | -- |
|            | Ca(ICCV2/PI489777)SNP_04454 | 1394 | T | C | 13 | 13 | --    | -- |
| CakTC21542 | Ca(ICCV2/PI489777)SNP_04455 | 432  | G | A | 27 | 9  | --    | -- |
|            | Ca(ICCV2/PI489777)SNP_04456 | 585  | C | T | 13 | 13 | --    | -- |
|            | Ca(ICCV2/PI489777)SNP_04457 | 609  | C | G | 16 | 14 | --    | -- |
|            | Ca(ICCV2/PI489777)SNP_04458 | 1273 | T | A | 24 | 6  | --    | -- |
| CakTC09122 | Ca(ICCV2/PI489777)SNP_04459 | 251  | G | T | 13 | 4  | --    | -- |
|            | Ca(ICCV2/PI489777)SNP_04460 | 1268 | A | C | 10 | 6  | --    | -- |
|            | Ca(ICCV2/PI489777)SNP_04461 | 1286 | T | C | 11 | 7  | --    | -- |
|            | Ca(ICCV2/PI489777)SNP_04462 | 1296 | A | G | 13 | 6  | --    | -- |
|            | Ca(ICCV2/PI489777)SNP_04463 | 1457 | C | T | 7  | 7  | --    | -- |
|            | Ca(ICCV2/PI489777)SNP_04464 | 1500 | C | T | 9  | 6  | --    | -- |
|            | Ca(ICCV2/PI489777)SNP_04465 | 1685 | G | T | 9  | 6  | --    | -- |
|            | Ca(ICCV2/PI489777)SNP_04466 | 2256 | A | G | 9  | 7  | --    | -- |
|            | Ca(ICCV2/PI489777)SNP_04467 | 3944 | A | G | 19 | 4  | --    | -- |
|            | Ca(ICCV2/PI489777)SNP_04468 | 4072 | C | T | 20 | 3  | --    | -- |
|            | Ca(ICCV2/PI489777)SNP_04469 | 4091 | G | A | 19 | 4  | --    | -- |
|            | Ca(ICCV2/PI489777)SNP_04470 | 4459 | G | A | 12 | 3  | --    | -- |
| CakTC28017 | Ca(ICCV2/PI489777)SNP_04471 | 1081 | G | C | 12 | 9  | --    | -- |
|            | Ca(ICCV2/PI489777)SNP_04472 | 1122 | G | A | 9  | 6  | --    | -- |
| CakTC32589 | Ca(ICCV2/PI489777)SNP_04473 | 1459 | T | C | 7  | 3  | --    | -- |
|            | Ca(ICCV2/PI489777)SNP_04474 | 1460 | C | G | 7  | 3  | --    | -- |
|            | Ca(ICCV2/PI489777)SNP_04475 | 1609 | C | T | 5  | 3  | --    | -- |
| CakTC33070 | Ca(ICCV2/PI489777)SNP_04476 | 2568 | G | A | 12 | 8  | --    | -- |
|            | Ca(ICCV2/PI489777)SNP_04477 | 2698 | T | C | 6  | 7  | --    | -- |
| CakTC31663 | Ca(ICCV2/PI489777)SNP_04478 | 392  | T | C | 13 | 4  | --    | -- |
|            | Ca(ICCV2/PI489777)SNP_04479 | 395  | A | G | 11 | 4  | --    | -- |
|            | Ca(ICCV2/PI489777)SNP_04480 | 875  | T | C | 13 | 6  | --    | -- |
| CakTC39891 | Ca(ICCV2/PI489777)SNP_04481 | 397  | A | G | 4  | 9  | --    | -- |
|            | Ca(ICCV2/PI489777)SNP_04482 | 995  | T | G | 13 | 12 | --    | -- |
|            | Ca(ICCV2/PI489777)SNP_04483 | 1115 | A | T | 15 | 9  | --    | -- |
| CakTC22760 | Ca(ICCV2/PI489777)SNP_04484 | 444  | A | G | 4  | 3  | --    | -- |
| CakTC36172 | Ca(ICCV2/PI489777)SNP_04485 | 234  | G | A | 7  | 3  | --    | -- |
|            | Ca(ICCV2/PI489777)SNP_04486 | 2330 | A | G | 6  | 4  | --    | -- |
| CakTC33429 | Ca(ICCV2/PI489777)SNP_04487 | 669  | A | G | 61 | 34 | --    | -- |
|            | Ca(ICCV2/PI489777)SNP_04488 | 731  | C | G | 9  | 3  | --    | -- |
| CakTC29148 | Ca(ICCV2/PI489777)SNP_04489 | 281  | T | C | 5  | 7  | --    | -- |
|            | Ca(ICCV2/PI489777)SNP_04490 | 318  | T | C | 4  | 6  | --    | -- |
|            | Ca(ICCV2/PI489777)SNP_04491 | 451  | A | T | 6  | 5  | --    | -- |
| CakTC25445 | Ca(ICCV2/PI489777)SNP_04492 | 234  | A | G | 6  | 18 | --    | -- |
|            | Ca(ICCV2/PI489777)SNP_04493 | 321  | T | C | 3  | 19 | --    | -- |
| CakTC34352 | Ca(ICCV2/PI489777)SNP_04494 | 293  | A | T | 43 | 13 | --    | -- |
| CakTC11552 | Ca(ICCV2/PI489777)SNP_04495 | 458  | G | A | 26 | 11 | --    | -- |
|            | Ca(ICCV2/PI489777)SNP_04496 | 470  | T | C | 26 | 10 | --    | -- |
|            | Ca(ICCV2/PI489777)SNP_04497 | 531  | T | A | 17 | 9  | --    | -- |
| CakTC26702 | Ca(ICCV2/PI489777)SNP_04498 | 417  | T | C | 7  | 7  | --    | -- |
| CakTC37454 | Ca(ICCV2/PI489777)SNP_04499 | 1483 | G | A | 10 | 9  | --    | -- |
| CakTC43133 | Ca(ICCV2/PI489777)SNP_04500 | 1361 | C | T | 25 | 18 | --    | -- |
|            | Ca(ICCV2/PI489777)SNP_04501 | 1647 | T | A | 15 | 12 | --    | -- |
|            | Ca(ICCV2/PI489777)SNP_04502 | 1701 | C | G | 6  | 3  | --    | -- |
| CakTC36563 | Ca(ICCV2/PI489777)SNP_04503 | 702  | G | A | 4  | 4  | --    | -- |
|            | Ca(ICCV2/PI489777)SNP_04504 | 987  | A | G | 9  | 6  | --    | -- |
|            | Ca(ICCV2/PI489777)SNP_04505 | 1185 | T | C | 3  | 8  | --    | -- |
|            | Ca(ICCV2/PI489777)SNP_04506 | 1359 | A | T | 6  | 5  | --    | -- |
|            | Ca(ICCV2/PI489777)SNP_04507 | 1427 | C | T | 6  | 5  | --    | -- |
|            | Ca(ICCV2/PI489777)SNP_04508 | 1916 | C | T | 7  | 5  | --    | -- |
|            | Ca(ICCV2/PI489777)SNP_04509 | 2367 | C | T | 6  | 3  | --    | -- |

|            |                            |      |   |   |    |    |       |             |
|------------|----------------------------|------|---|---|----|----|-------|-------------|
|            | Ca(ICC2/PI489777)SNP_04510 | 2421 | C | T | 5  | 3  | --    | --          |
|            | Ca(ICC2/PI489777)SNP_04511 | 3930 | C | T | 3  | 4  | --    | --          |
|            | Ca(ICC2/PI489777)SNP_04512 | 4086 | T | C | 6  | 3  | --    | --          |
|            | Ca(ICC2/PI489777)SNP_04513 | 4097 | C | T | 6  | 4  | --    | --          |
|            | Ca(ICC2/PI489777)SNP_04514 | 4316 | C | T | 4  | 5  | --    | --          |
|            | Ca(ICC2/PI489777)SNP_04515 | 4317 | C | T | 4  | 4  | --    | --          |
|            | Ca(ICC2/PI489777)SNP_04516 | 4881 | A | G | 4  | 5  | --    | --          |
|            | Ca(ICC2/PI489777)SNP_04517 | 5001 | G | A | 3  | 3  | --    | --          |
|            | Ca(ICC2/PI489777)SNP_04518 | 5496 | A | G | 4  | 6  | --    | --          |
| CakTC26397 | Ca(ICC2/PI489777)SNP_04519 | 390  | T | C | 30 | 28 | --    | --          |
|            | Ca(ICC2/PI489777)SNP_04520 | 815  | C | A | 51 | 21 | --    | --          |
|            | Ca(ICC2/PI489777)SNP_04521 | 1965 | T | C | 59 | 39 | --    | --          |
|            | Ca(ICC2/PI489777)SNP_04522 | 2863 | G | A | 18 | 14 | --    | --          |
| CakTC22727 | Ca(ICC2/PI489777)SNP_04523 | 930  | G | A | 24 | 12 | --    | --          |
|            | Ca(ICC2/PI489777)SNP_04524 | 1121 | C | T | 13 | 8  | --    | --          |
|            | Ca(ICC2/PI489777)SNP_04525 | 1138 | C | G | 12 | 8  | --    | --          |
|            | Ca(ICC2/PI489777)SNP_04526 | 1239 | G | A | 10 | 6  | --    | --          |
|            | Ca(ICC2/PI489777)SNP_04527 | 1635 | C | T | 16 | 13 | --    | --          |
|            | Ca(ICC2/PI489777)SNP_04528 | 1691 | G | C | 22 | 17 | --    | --          |
|            | Ca(ICC2/PI489777)SNP_04529 | 1695 | G | T | 21 | 17 | --    | --          |
|            | Ca(ICC2/PI489777)SNP_04530 | 1739 | C | G | 24 | 18 | --    | --          |
|            | Ca(ICC2/PI489777)SNP_04531 | 1947 | A | C | 21 | 6  | --    | --          |
|            | Ca(ICC2/PI489777)SNP_04532 | 2095 | A | G | 18 | 9  | --    | --          |
|            | Ca(ICC2/PI489777)SNP_04533 | 2342 | A | G | 19 | 7  | --    | --          |
|            | Ca(ICC2/PI489777)SNP_04534 | 2843 | G | A | 18 | 14 | --    | --          |
|            | Ca(ICC2/PI489777)SNP_04535 | 2845 | A | G | 19 | 13 | --    | --          |
| CakTC33900 | Ca(ICC2/PI489777)SNP_04536 | 303  | G | C | 3  | 13 | --    | --          |
| CakTC39267 | Ca(ICC2/PI489777)SNP_04537 | 681  | C | T | 6  | 36 | --    | --          |
| CakTC35792 | Ca(ICC2/PI489777)SNP_04538 | 94   | C | T | 7  | 3  | --    | --          |
| CakTC39847 | Ca(ICC2/PI489777)SNP_04539 | 68   | G | T | 3  | 5  | --    | --          |
|            | Ca(ICC2/PI489777)SNP_04540 | 88   | C | T | 3  | 5  | --    | --          |
|            | Ca(ICC2/PI489777)SNP_04541 | 212  | A | T | 5  | 10 | --    | --          |
|            | Ca(ICC2/PI489777)SNP_04542 | 250  | T | G | 6  | 10 | --    | --          |
|            | Ca(ICC2/PI489777)SNP_04543 | 1463 | C | G | 4  | 3  | --    | --          |
| CakTC38714 | Ca(ICC2/PI489777)SNP_04544 | 400  | G | T | 6  | 4  | --    | --          |
|            | Ca(ICC2/PI489777)SNP_04545 | 676  | G | A | 14 | 3  | --    | --          |
|            | Ca(ICC2/PI489777)SNP_04546 | 730  | A | G | 15 | 4  | --    | --          |
| CakTC39440 | Ca(ICC2/PI489777)SNP_04547 | 395  | A | G | 13 | 10 | --    | --          |
|            | Ca(ICC2/PI489777)SNP_04548 | 451  | A | C | 11 | 13 | --    | --          |
|            | Ca(ICC2/PI489777)SNP_04549 | 543  | C | A | 9  | 11 | --    | --          |
|            | Ca(ICC2/PI489777)SNP_04550 | 545  | G | A | 10 | 10 | --    | --          |
|            | Ca(ICC2/PI489777)SNP_04551 | 563  | G | A | 11 | 11 | --    | --          |
|            | Ca(ICC2/PI489777)SNP_04552 | 611  | G | A | 9  | 9  | --    | --          |
|            | Ca(ICC2/PI489777)SNP_04553 | 719  | T | C | 11 | 4  | --    | --          |
| CakTC39930 | Ca(ICC2/PI489777)SNP_04554 | 1153 | G | A | 10 | 13 | --    | --          |
| CakTC39036 | Ca(ICC2/PI489777)SNP_04555 | 175  | T | A | 8  | 6  | --    | --          |
|            | Ca(ICC2/PI489777)SNP_04556 | 437  | A | C | 10 | 8  | --    | --          |
|            | Ca(ICC2/PI489777)SNP_04557 | 1063 | T | C | 12 | 6  | --    | --          |
| CakTC11077 | Ca(ICC2/PI489777)SNP_04558 | 667  | C | T | 12 | 11 | --    | --          |
|            | Ca(ICC2/PI489777)SNP_04559 | 697  | G | A | 10 | 10 | --    | --          |
|            | Ca(ICC2/PI489777)SNP_04560 | 714  | T | G | 10 | 8  | --    | --          |
|            | Ca(ICC2/PI489777)SNP_04561 | 715  | A | T | 10 | 8  | --    | --          |
| CakTC27222 | Ca(ICC2/PI489777)SNP_04562 | 175  | G | T | 9  | 3  | --    | --          |
|            | Ca(ICC2/PI489777)SNP_04563 | 648  | A | T | 7  | 5  | --    | --          |
|            | Ca(ICC2/PI489777)SNP_04564 | 1146 | T | C | 16 | 3  | --    | --          |
|            | Ca(ICC2/PI489777)SNP_04565 | 1597 | G | C | 14 | 7  | --    | --          |
| CakTC31452 | Ca(ICC2/PI489777)SNP_04566 | 592  | T | C | 13 | 8  | Shoot | --          |
|            | Ca(ICC2/PI489777)SNP_04567 | 641  | C | A | 15 | 8  | Shoot | --          |
|            | Ca(ICC2/PI489777)SNP_04568 | 851  | A | G | 16 | 4  | Shoot | --          |
|            | Ca(ICC2/PI489777)SNP_04569 | 1797 | T | A | 8  | 3  | Shoot | --          |
|            | Ca(ICC2/PI489777)SNP_04570 | 1798 | G | T | 7  | 4  | Shoot | --          |
| CakTC35532 | Ca(ICC2/PI489777)SNP_04571 | 388  | G | C | 21 | 7  | --    | --          |
|            | Ca(ICC2/PI489777)SNP_04572 | 741  | T | C | 25 | 14 | --    | --          |
|            | Ca(ICC2/PI489777)SNP_04573 | 768  | C | A | 30 | 11 | --    | --          |
|            | Ca(ICC2/PI489777)SNP_04574 | 889  | A | G | 24 | 13 | --    | --          |
|            | Ca(ICC2/PI489777)SNP_04575 | 1176 | C | T | 23 | 17 | --    | --          |
|            | Ca(ICC2/PI489777)SNP_04576 | 1950 | C | T | 13 | 8  | --    | --          |
|            | Ca(ICC2/PI489777)SNP_04577 | 2255 | G | A | 10 | 9  | --    | --          |
|            | Ca(ICC2/PI489777)SNP_04578 | 3207 | A | G | 9  | 10 | --    | --          |
|            | Ca(ICC2/PI489777)SNP_04579 | 3247 | G | A | 10 | 11 | --    | --          |
|            | Ca(ICC2/PI489777)SNP_04580 | 3503 | G | T | 7  | 7  | --    | --          |
| CakTC29625 | Ca(ICC2/PI489777)SNP_04581 | 647  | C | T | 63 | 38 | --    | --          |
| CakTC34783 | Ca(ICC2/PI489777)SNP_04582 | 148  | A | G | 5  | 4  | --    | Bromodomain |
|            | Ca(ICC2/PI489777)SNP_04583 | 950  | A | G | 5  | 4  | --    | Bromodomain |

|            |                             |      |   |   |     |     |    |             |
|------------|-----------------------------|------|---|---|-----|-----|----|-------------|
|            | Ca(ICCV2/PI489777)SNP_04584 | 2309 | T | A | 6   | 5   | -- | Bromodomain |
|            | Ca(ICCV2/PI489777)SNP_04585 | 2510 | A | G | 5   | 4   | -- | Bromodomain |
|            | Ca(ICCV2/PI489777)SNP_04586 | 2609 | T | C | 8   | 6   | -- | Bromodomain |
|            | Ca(ICCV2/PI489777)SNP_04587 | 2673 | A | T | 9   | 4   | -- | Bromodomain |
|            | Ca(ICCV2/PI489777)SNP_04588 | 2763 | A | C | 8   | 5   | -- | Bromodomain |
|            | Ca(ICCV2/PI489777)SNP_04589 | 3291 | G | T | 4   | 13  | -- | Bromodomain |
|            | Ca(ICCV2/PI489777)SNP_04590 | 3734 | T | C | 4   | 6   | -- | Bromodomain |
| CakTC22771 | Ca(ICCV2/PI489777)SNP_04591 | 462  | T | C | 214 | 119 | -- | --          |
| CakTC26402 | Ca(ICCV2/PI489777)SNP_04592 | 100  | T | C | 3   | 4   | -- | --          |
| CakTC27464 | Ca(ICCV2/PI489777)SNP_04593 | 1143 | T | C | 12  | 10  | -- | --          |
|            | Ca(ICCV2/PI489777)SNP_04594 | 1380 | G | A | 16  | 11  | -- | --          |
| CakTC39017 | Ca(ICCV2/PI489777)SNP_04595 | 340  | T | C | 4   | 7   | -- | --          |
| CakTC35832 | Ca(ICCV2/PI489777)SNP_04596 | 828  | T | A | 6   | 3   | -- | --          |
|            | Ca(ICCV2/PI489777)SNP_04597 | 1275 | A | G | 6   | 8   | -- | --          |
|            | Ca(ICCV2/PI489777)SNP_04598 | 2955 | C | G | 10  | 5   | -- | --          |
| CakTC28246 | Ca(ICCV2/PI489777)SNP_04599 | 141  | G | A | 42  | 17  | -- | --          |
| CakTC33080 | Ca(ICCV2/PI489777)SNP_04600 | 1502 | C | T | 4   | 11  | -- | --          |
|            | Ca(ICCV2/PI489777)SNP_04601 | 2141 | C | T | 10  | 3   | -- | --          |
|            | Ca(ICCV2/PI489777)SNP_04602 | 2258 | A | T | 15  | 3   | -- | --          |
| CakTC26886 | Ca(ICCV2/PI489777)SNP_04603 | 583  | C | T | 17  | 11  | -- | --          |
|            | Ca(ICCV2/PI489777)SNP_04604 | 705  | G | T | 11  | 5   | -- | --          |
| CakTC29129 | Ca(ICCV2/PI489777)SNP_04605 | 126  | C | G | 8   | 7   | -- | --          |
|            | Ca(ICCV2/PI489777)SNP_04606 | 1531 | G | A | 27  | 3   | -- | --          |
|            | Ca(ICCV2/PI489777)SNP_04607 | 1627 | T | C | 29  | 5   | -- | --          |
|            | Ca(ICCV2/PI489777)SNP_04608 | 2117 | C | G | 4   | 5   | -- | --          |
| CakTC41639 | Ca(ICCV2/PI489777)SNP_04609 | 142  | A | C | 14  | 5   | -- | --          |
|            | Ca(ICCV2/PI489777)SNP_04610 | 217  | A | G | 15  | 6   | -- | --          |
| CakTC33259 | Ca(ICCV2/PI489777)SNP_04611 | 694  | A | G | 17  | 6   | -- | --          |
| CakTC07832 | Ca(ICCV2/PI489777)SNP_04612 | 405  | C | A | 6   | 15  | -- | --          |
| CakTC27037 | Ca(ICCV2/PI489777)SNP_04613 | 327  | T | C | 33  | 15  | -- | --          |
|            | Ca(ICCV2/PI489777)SNP_04614 | 516  | T | C | 21  | 11  | -- | --          |
|            | Ca(ICCV2/PI489777)SNP_04615 | 546  | G | T | 20  | 10  | -- | --          |
|            | Ca(ICCV2/PI489777)SNP_04616 | 1407 | C | G | 12  | 10  | -- | --          |
|            | Ca(ICCV2/PI489777)SNP_04617 | 1528 | T | C | 5   | 7   | -- | --          |
| CakTC27669 | Ca(ICCV2/PI489777)SNP_04618 | 1609 | T | C | 12  | 4   | -- | --          |
|            | Ca(ICCV2/PI489777)SNP_04619 | 1699 | T | C | 7   | 5   | -- | --          |
| CakTC39572 | Ca(ICCV2/PI489777)SNP_04620 | 78   | A | G | 6   | 4   | -- | --          |
|            | Ca(ICCV2/PI489777)SNP_04621 | 1026 | G | A | 11  | 9   | -- | --          |
| CakTC37146 | Ca(ICCV2/PI489777)SNP_04622 | 863  | C | T | 20  | 3   | -- | --          |
| CakTC27811 | Ca(ICCV2/PI489777)SNP_04623 | 136  | C | T | 6   | 5   | -- | --          |
|            | Ca(ICCV2/PI489777)SNP_04624 | 454  | A | G | 29  | 23  | -- | --          |
|            | Ca(ICCV2/PI489777)SNP_04625 | 1287 | G | A | 24  | 18  | -- | --          |
| CakTC40616 | Ca(ICCV2/PI489777)SNP_04626 | 433  | A | T | 4   | 4   | -- | NAC         |
|            | Ca(ICCV2/PI489777)SNP_04627 | 696  | A | G | 4   | 4   | -- | NAC         |
|            | Ca(ICCV2/PI489777)SNP_04628 | 752  | T | C | 4   | 3   | -- | NAC         |
| CakTC38027 | Ca(ICCV2/PI489777)SNP_04629 | 1520 | A | G | 3   | 3   | -- | --          |
| CakTC37753 | Ca(ICCV2/PI489777)SNP_04630 | 641  | G | A | 3   | 4   | -- | WRKY        |
|            | Ca(ICCV2/PI489777)SNP_04631 | 686  | T | C | 7   | 5   | -- | WRKY        |
|            | Ca(ICCV2/PI489777)SNP_04632 | 692  | G | T | 7   | 5   | -- | WRKY        |
|            | Ca(ICCV2/PI489777)SNP_04633 | 725  | T | C | 9   | 5   | -- | WRKY        |
|            | Ca(ICCV2/PI489777)SNP_04634 | 851  | T | C | 8   | 4   | -- | WRKY        |
| CakTC38218 | Ca(ICCV2/PI489777)SNP_04635 | 234  | C | A | 15  | 7   | -- | --          |
|            | Ca(ICCV2/PI489777)SNP_04636 | 252  | T | A | 15  | 9   | -- | --          |
|            | Ca(ICCV2/PI489777)SNP_04637 | 609  | G | C | 14  | 18  | -- | --          |
|            | Ca(ICCV2/PI489777)SNP_04638 | 1096 | T | C | 10  | 4   | -- | --          |
| CakTC37238 | Ca(ICCV2/PI489777)SNP_04639 | 950  | A | C | 7   | 11  | -- | --          |
| CakTC28399 | Ca(ICCV2/PI489777)SNP_04640 | 374  | A | C | 33  | 30  | -- | --          |
|            | Ca(ICCV2/PI489777)SNP_04641 | 611  | A | C | 41  | 42  | -- | --          |
|            | Ca(ICCV2/PI489777)SNP_04642 | 680  | T | C | 42  | 38  | -- | --          |
|            | Ca(ICCV2/PI489777)SNP_04643 | 1112 | C | G | 43  | 14  | -- | --          |
|            | Ca(ICCV2/PI489777)SNP_04644 | 2344 | G | T | 11  | 3   | -- | --          |
|            | Ca(ICCV2/PI489777)SNP_04645 | 2471 | C | G | 17  | 8   | -- | --          |
|            | Ca(ICCV2/PI489777)SNP_04646 | 2539 | G | A | 17  | 7   | -- | --          |
|            | Ca(ICCV2/PI489777)SNP_04647 | 2561 | G | A | 16  | 7   | -- | --          |
| CakTC35302 | Ca(ICCV2/PI489777)SNP_04648 | 92   | T | A | 4   | 4   | -- | --          |
|            | Ca(ICCV2/PI489777)SNP_04649 | 949  | C | T | 17  | 19  | -- | --          |
|            | Ca(ICCV2/PI489777)SNP_04650 | 1690 | C | T | 23  | 26  | -- | --          |
|            | Ca(ICCV2/PI489777)SNP_04651 | 2977 | T | C | 26  | 18  | -- | --          |
|            | Ca(ICCV2/PI489777)SNP_04652 | 3001 | C | T | 22  | 16  | -- | --          |
|            | Ca(ICCV2/PI489777)SNP_04653 | 3628 | C | G | 36  | 18  | -- | --          |
|            | Ca(ICCV2/PI489777)SNP_04654 | 4021 | G | C | 17  | 18  | -- | --          |
| CakTC30231 | Ca(ICCV2/PI489777)SNP_04655 | 531  | A | G | 13  | 3   | -- | --          |
|            | Ca(ICCV2/PI489777)SNP_04656 | 1107 | G | A | 25  | 3   | -- | --          |
|            | Ca(ICCV2/PI489777)SNP_04657 | 1146 | A | C | 14  | 3   | -- | --          |

|            |                            |      |   |   |     |    |      |            |
|------------|----------------------------|------|---|---|-----|----|------|------------|
|            | Ca(ICC2/PI489777)SNP_04658 | 1188 | A | C | 12  | 3  | --   | --         |
| CakTC40387 | Ca(ICC2/PI489777)SNP_04659 | 1046 | G | T | 11  | 3  | --   | --         |
| CakTC24130 | Ca(ICC2/PI489777)SNP_04660 | 278  | G | A | 13  | 3  | --   | --         |
|            | Ca(ICC2/PI489777)SNP_04661 | 347  | T | C | 10  | 3  | --   | --         |
|            | Ca(ICC2/PI489777)SNP_04662 | 577  | T | C | 14  | 4  | --   | --         |
| CakTC30674 | Ca(ICC2/PI489777)SNP_04663 | 1359 | T | G | 3   | 6  | --   | --         |
|            | Ca(ICC2/PI489777)SNP_04664 | 1365 | A | G | 3   | 6  | --   | --         |
| CakTC24679 | Ca(ICC2/PI489777)SNP_04665 | 421  | G | C | 8   | 7  | --   | --         |
|            | Ca(ICC2/PI489777)SNP_04666 | 1025 | T | C | 8   | 3  | --   | --         |
|            | Ca(ICC2/PI489777)SNP_04667 | 2139 | G | T | 23  | 10 | --   | --         |
|            | Ca(ICC2/PI489777)SNP_04668 | 2182 | A | C | 15  | 9  | --   | --         |
|            | Ca(ICC2/PI489777)SNP_04669 | 2318 | C | T | 4   | 5  | --   | --         |
| CakTC24901 | Ca(ICC2/PI489777)SNP_04670 | 578  | C | T | 35  | 38 | --   | --         |
| CakTC40736 | Ca(ICC2/PI489777)SNP_04671 | 166  | A | G | 18  | 22 | --   | --         |
|            | Ca(ICC2/PI489777)SNP_04672 | 231  | T | C | 18  | 21 | --   | --         |
|            | Ca(ICC2/PI489777)SNP_04673 | 243  | A | G | 17  | 24 | --   | --         |
|            | Ca(ICC2/PI489777)SNP_04674 | 606  | C | T | 30  | 21 | --   | --         |
|            | Ca(ICC2/PI489777)SNP_04675 | 681  | A | G | 28  | 11 | --   | --         |
|            | Ca(ICC2/PI489777)SNP_04676 | 1181 | T | A | 14  | 10 | --   | --         |
|            | Ca(ICC2/PI489777)SNP_04677 | 1220 | G | T | 15  | 11 | --   | --         |
| CakTC38555 | Ca(ICC2/PI489777)SNP_04678 | 1466 | C | T | 9   | 8  | --   | --         |
|            | Ca(ICC2/PI489777)SNP_04679 | 1599 | C | T | 8   | 5  | --   | --         |
| CakTC32181 | Ca(ICC2/PI489777)SNP_04680 | 1062 | A | T | 9   | 6  | --   | --         |
| CakTC37589 | Ca(ICC2/PI489777)SNP_04681 | 177  | C | T | 8   | 7  | --   | --         |
|            | Ca(ICC2/PI489777)SNP_04682 | 194  | T | G | 12  | 9  | --   | --         |
|            | Ca(ICC2/PI489777)SNP_04683 | 206  | A | C | 12  | 11 | --   | --         |
|            | Ca(ICC2/PI489777)SNP_04684 | 380  | A | G | 14  | 13 | --   | --         |
|            | Ca(ICC2/PI489777)SNP_04685 | 443  | T | A | 19  | 23 | --   | --         |
|            | Ca(ICC2/PI489777)SNP_04686 | 556  | G | A | 19  | 25 | --   | --         |
|            | Ca(ICC2/PI489777)SNP_04687 | 595  | C | G | 15  | 22 | --   | --         |
| CakTC30681 | Ca(ICC2/PI489777)SNP_04688 | 2814 | A | G | 7   | 5  | --   | --         |
| CakTC34911 | Ca(ICC2/PI489777)SNP_04689 | 350  | A | G | 7   | 8  | --   | MYB        |
| CakTC24808 | Ca(ICC2/PI489777)SNP_04690 | 286  | T | C | 115 | 14 | --   | --         |
|            | Ca(ICC2/PI489777)SNP_04691 | 289  | G | A | 121 | 14 | --   | --         |
|            | Ca(ICC2/PI489777)SNP_04692 | 407  | G | T | 149 | 17 | --   | --         |
| CakTC28475 | Ca(ICC2/PI489777)SNP_04693 | 1924 | T | C | 15  | 3  | --   | --         |
|            | Ca(ICC2/PI489777)SNP_04694 | 2031 | A | G | 11  | 4  | --   | --         |
|            | Ca(ICC2/PI489777)SNP_04695 | 2350 | T | G | 11  | 7  | --   | --         |
|            | Ca(ICC2/PI489777)SNP_04696 | 2557 | A | G | 7   | 4  | --   | --         |
|            | Ca(ICC2/PI489777)SNP_04697 | 2568 | C | T | 6   | 4  | --   | --         |
|            | Ca(ICC2/PI489777)SNP_04698 | 2729 | G | A | 8   | 5  | --   | --         |
|            | Ca(ICC2/PI489777)SNP_04699 | 2873 | G | A | 9   | 5  | --   | --         |
| CakTC23777 | Ca(ICC2/PI489777)SNP_04700 | 117  | A | G | 4   | 4  | --   | --         |
| CakTC24696 | Ca(ICC2/PI489777)SNP_04701 | 1659 | G | A | 7   | 3  | --   | --         |
| CakTC36380 | Ca(ICC2/PI489777)SNP_04702 | 51   | G | T | 12  | 9  | --   | --         |
|            | Ca(ICC2/PI489777)SNP_04703 | 110  | A | G | 18  | 13 | --   | --         |
| CakTC43284 | Ca(ICC2/PI489777)SNP_04704 | 84   | A | G | 13  | 5  | --   | PBF-2-like |
|            | Ca(ICC2/PI489777)SNP_04705 | 175  | C | G | 13  | 5  | --   | PBF-2-like |
| CakTC25194 | Ca(ICC2/PI489777)SNP_04706 | 531  | G | C | 5   | 6  | --   | --         |
| CakTC04658 | Ca(ICC2/PI489777)SNP_04707 | 600  | T | C | 3   | 3  | --   | --         |
| CakTC20159 | Ca(ICC2/PI489777)SNP_04708 | 877  | G | A | 11  | 5  | Root | --         |
|            | Ca(ICC2/PI489777)SNP_04709 | 943  | G | A | 9   | 5  | Root | --         |
| CakTC29266 | Ca(ICC2/PI489777)SNP_04710 | 1145 | T | C | 5   | 5  | --   | --         |
| CakTC34893 | Ca(ICC2/PI489777)SNP_04711 | 617  | A | G | 3   | 4  | --   | --         |
| CakTC31866 | Ca(ICC2/PI489777)SNP_04712 | 208  | G | A | 5   | 3  | --   | --         |
|            | Ca(ICC2/PI489777)SNP_04713 | 276  | G | A | 12  | 6  | --   | --         |
|            | Ca(ICC2/PI489777)SNP_04714 | 527  | T | C | 9   | 7  | --   | --         |
|            | Ca(ICC2/PI489777)SNP_04715 | 1397 | T | C | 5   | 6  | --   | --         |
|            | Ca(ICC2/PI489777)SNP_04716 | 2045 | T | C | 5   | 4  | --   | --         |
|            | Ca(ICC2/PI489777)SNP_04717 | 2075 | G | A | 6   | 4  | --   | --         |
|            | Ca(ICC2/PI489777)SNP_04718 | 2248 | G | T | 7   | 3  | --   | --         |
| CakTC37488 | Ca(ICC2/PI489777)SNP_04719 | 659  | A | T | 5   | 3  | --   | --         |
| CakTC25125 | Ca(ICC2/PI489777)SNP_04720 | 468  | G | A | 11  | 3  | --   | --         |
|            | Ca(ICC2/PI489777)SNP_04721 | 496  | G | A | 15  | 3  | --   | --         |
|            | Ca(ICC2/PI489777)SNP_04722 | 742  | T | C | 16  | 6  | --   | --         |
|            | Ca(ICC2/PI489777)SNP_04723 | 908  | C | T | 4   | 5  | --   | --         |
|            | Ca(ICC2/PI489777)SNP_04724 | 956  | A | C | 3   | 5  | --   | --         |
| CakTC28676 | Ca(ICC2/PI489777)SNP_04725 | 244  | G | A | 3   | 7  | --   | --         |
|            | Ca(ICC2/PI489777)SNP_04726 | 803  | A | G | 8   | 7  | --   | --         |
|            | Ca(ICC2/PI489777)SNP_04727 | 898  | C | T | 12  | 7  | --   | --         |
|            | Ca(ICC2/PI489777)SNP_04728 | 976  | A | G | 9   | 5  | --   | --         |
|            | Ca(ICC2/PI489777)SNP_04729 | 1563 | A | G | 7   | 5  | --   | --         |
|            | Ca(ICC2/PI489777)SNP_04730 | 2394 | T | A | 4   | 4  | --   | --         |
| CakTC00760 | Ca(ICC2/PI489777)SNP_04731 | 69   | G | T | 12  | 3  | --   | --         |



|            |                            |      |   |   |    |    |        |      |
|------------|----------------------------|------|---|---|----|----|--------|------|
|            | Ca(ICC2/PI489777)SNP_04732 | 172  | A | G | 11 | 8  | --     | --   |
|            | Ca(ICC2/PI489777)SNP_04733 | 176  | A | T | 12 | 8  | --     | --   |
|            | Ca(ICC2/PI489777)SNP_04734 | 300  | T | A | 15 | 12 | --     | --   |
|            | Ca(ICC2/PI489777)SNP_04735 | 359  | C | T | 12 | 10 | --     | --   |
| CakTC29952 | Ca(ICC2/PI489777)SNP_04736 | 268  | A | C | 4  | 3  | --     | --   |
|            | Ca(ICC2/PI489777)SNP_04737 | 1065 | A | G | 13 | 5  | --     | --   |
|            | Ca(ICC2/PI489777)SNP_04738 | 1212 | G | T | 10 | 5  | --     | --   |
|            | Ca(ICC2/PI489777)SNP_04739 | 1257 | A | T | 9  | 4  | --     | --   |
|            | Ca(ICC2/PI489777)SNP_04740 | 1428 | C | T | 10 | 4  | --     | --   |
|            | Ca(ICC2/PI489777)SNP_04741 | 1470 | A | C | 7  | 4  | --     | --   |
| CakTC39959 | Ca(ICC2/PI489777)SNP_04742 | 25   | C | G | 6  | 3  | --     | --   |
|            | Ca(ICC2/PI489777)SNP_04743 | 83   | T | C | 13 | 5  | --     | --   |
|            | Ca(ICC2/PI489777)SNP_04744 | 254  | C | T | 12 | 6  | --     | --   |
|            | Ca(ICC2/PI489777)SNP_04745 | 290  | T | C | 15 | 6  | --     | --   |
|            | Ca(ICC2/PI489777)SNP_04746 | 635  | A | G | 15 | 4  | --     | --   |
|            | Ca(ICC2/PI489777)SNP_04747 | 1150 | G | A | 13 | 6  | --     | --   |
|            | Ca(ICC2/PI489777)SNP_04748 | 1153 | T | C | 14 | 6  | --     | --   |
|            | Ca(ICC2/PI489777)SNP_04749 | 1184 | G | T | 14 | 5  | --     | --   |
|            | Ca(ICC2/PI489777)SNP_04750 | 1208 | G | A | 14 | 4  | --     | --   |
|            | Ca(ICC2/PI489777)SNP_04751 | 1226 | A | G | 12 | 6  | --     | --   |
| CakTC29988 | Ca(ICC2/PI489777)SNP_04752 | 93   | C | T | 34 | 3  | --     | --   |
|            | Ca(ICC2/PI489777)SNP_04753 | 1304 | G | A | 49 | 21 | --     | --   |
|            | Ca(ICC2/PI489777)SNP_04754 | 1444 | G | A | 72 | 12 | --     | --   |
|            | Ca(ICC2/PI489777)SNP_04755 | 2134 | T | C | 69 | 24 | --     | --   |
|            | Ca(ICC2/PI489777)SNP_04756 | 2139 | G | C | 70 | 26 | --     | --   |
|            | Ca(ICC2/PI489777)SNP_04757 | 2271 | T | G | 59 | 25 | --     | --   |
|            | Ca(ICC2/PI489777)SNP_04758 | 2301 | G | C | 62 | 28 | --     | --   |
|            | Ca(ICC2/PI489777)SNP_04759 | 2481 | G | A | 21 | 5  | --     | --   |
| CakTC33571 | Ca(ICC2/PI489777)SNP_04760 | 589  | G | A | 4  | 9  | --     | --   |
|            | Ca(ICC2/PI489777)SNP_04761 | 1762 | G | A | 4  | 3  | --     | --   |
|            | Ca(ICC2/PI489777)SNP_04762 | 1833 | C | T | 3  | 3  | --     | --   |
| CakTC34108 | Ca(ICC2/PI489777)SNP_04763 | 114  | A | G | 17 | 5  | --     | --   |
|            | Ca(ICC2/PI489777)SNP_04764 | 132  | C | T | 43 | 20 | --     | --   |
| CakTC41011 | Ca(ICC2/PI489777)SNP_04765 | 385  | C | A | 3  | 3  | Flower | bud  |
| CakTC25981 | Ca(ICC2/PI489777)SNP_04766 | 813  | T | C | 46 | 30 | --     | --   |
| CakTC34408 | Ca(ICC2/PI489777)SNP_04767 | 226  | A | T | 7  | 3  | --     | --   |
|            | Ca(ICC2/PI489777)SNP_04768 | 406  | C | T | 5  | 3  | --     | --   |
|            | Ca(ICC2/PI489777)SNP_04769 | 543  | C | T | 7  | 6  | --     | --   |
|            | Ca(ICC2/PI489777)SNP_04770 | 791  | A | T | 6  | 9  | --     | --   |
|            | Ca(ICC2/PI489777)SNP_04771 | 933  | G | T | 8  | 8  | --     | --   |
|            | Ca(ICC2/PI489777)SNP_04772 | 941  | T | C | 8  | 9  | --     | --   |
|            | Ca(ICC2/PI489777)SNP_04773 | 996  | G | A | 8  | 7  | --     | --   |
|            | Ca(ICC2/PI489777)SNP_04774 | 1000 | G | A | 8  | 7  | --     | --   |
| CakTC40158 | Ca(ICC2/PI489777)SNP_04775 | 221  | T | C | 11 | 10 | --     | --   |
| CakTC33199 | Ca(ICC2/PI489777)SNP_04776 | 705  | T | G | 23 | 4  | --     | GRAS |
|            | Ca(ICC2/PI489777)SNP_04777 | 738  | C | T | 24 | 6  | --     | GRAS |
|            | Ca(ICC2/PI489777)SNP_04778 | 829  | C | A | 37 | 3  | --     | GRAS |
|            | Ca(ICC2/PI489777)SNP_04779 | 1176 | T | C | 38 | 4  | --     | GRAS |
|            | Ca(ICC2/PI489777)SNP_04780 | 1389 | T | C | 36 | 7  | --     | GRAS |
|            | Ca(ICC2/PI489777)SNP_04781 | 1608 | G | A | 38 | 5  | --     | GRAS |
|            | Ca(ICC2/PI489777)SNP_04782 | 1755 | G | C | 20 | 9  | --     | GRAS |
|            | Ca(ICC2/PI489777)SNP_04783 | 1809 | A | G | 19 | 9  | --     | GRAS |
|            | Ca(ICC2/PI489777)SNP_04784 | 1921 | C | G | 18 | 9  | --     | GRAS |
|            | Ca(ICC2/PI489777)SNP_04785 | 2071 | T | G | 3  | 4  | --     | GRAS |
| CakTC37286 | Ca(ICC2/PI489777)SNP_04786 | 680  | G | A | 59 | 26 | --     | --   |
| CakTC32803 | Ca(ICC2/PI489777)SNP_04787 | 94   | C | T | 11 | 4  | --     | --   |
|            | Ca(ICC2/PI489777)SNP_04788 | 253  | T | C | 11 | 6  | --     | --   |
|            | Ca(ICC2/PI489777)SNP_04789 | 442  | C | T | 12 | 6  | --     | --   |
|            | Ca(ICC2/PI489777)SNP_04790 | 557  | G | A | 15 | 4  | --     | --   |
|            | Ca(ICC2/PI489777)SNP_04791 | 583  | A | G | 16 | 4  | --     | --   |
|            | Ca(ICC2/PI489777)SNP_04792 | 605  | C | G | 17 | 4  | --     | --   |
|            | Ca(ICC2/PI489777)SNP_04793 | 827  | A | C | 18 | 3  | --     | --   |
|            | Ca(ICC2/PI489777)SNP_04794 | 940  | A | G | 13 | 5  | --     | --   |
|            | Ca(ICC2/PI489777)SNP_04795 | 1389 | G | A | 22 | 12 | --     | --   |
|            | Ca(ICC2/PI489777)SNP_04796 | 1399 | C | T | 18 | 12 | --     | --   |
|            | Ca(ICC2/PI489777)SNP_04797 | 2664 | G | A | 6  | 4  | --     | --   |
|            | Ca(ICC2/PI489777)SNP_04798 | 2709 | A | C | 5  | 3  | --     | --   |
| CakTC42772 | Ca(ICC2/PI489777)SNP_04799 | 271  | T | C | 8  | 7  | --     | bZIP |
|            | Ca(ICC2/PI489777)SNP_04800 | 870  | G | A | 14 | 12 | --     | bZIP |
|            | Ca(ICC2/PI489777)SNP_04801 | 1036 | T | C | 13 | 14 | --     | bZIP |
|            | Ca(ICC2/PI489777)SNP_04802 | 1366 | C | A | 26 | 14 | --     | bZIP |
|            | Ca(ICC2/PI489777)SNP_04803 | 1378 | G | A | 21 | 17 | --     | bZIP |
|            | Ca(ICC2/PI489777)SNP_04804 | 1438 | C | A | 26 | 20 | --     | bZIP |
| CakTC10654 | Ca(ICC2/PI489777)SNP_04805 | 1011 | A | G | 3  | 3  | --     | --   |

|            |                             |      |   |   |    |    |           |         |
|------------|-----------------------------|------|---|---|----|----|-----------|---------|
| CakTC32000 | Ca(ICCV2/PI489777)SNP_04806 | 655  | C | A | 4  | 3  | --        | --      |
|            | Ca(ICCV2/PI489777)SNP_04807 | 1261 | A | G | 6  | 6  | --        | --      |
|            | Ca(ICCV2/PI489777)SNP_04808 | 1284 | T | C | 5  | 7  | --        | --      |
|            | Ca(ICCV2/PI489777)SNP_04809 | 1541 | C | G | 6  | 5  | --        | --      |
|            | Ca(ICCV2/PI489777)SNP_04810 | 1602 | T | G | 6  | 5  | --        | --      |
|            | Ca(ICCV2/PI489777)SNP_04811 | 1612 | C | T | 6  | 3  | --        | --      |
| CakTC42673 | Ca(ICCV2/PI489777)SNP_04812 | 754  | A | G | 3  | 3  | --        | --      |
| CakTC27047 | Ca(ICCV2/PI489777)SNP_04813 | 468  | C | A | 21 | 3  | --        | --      |
| CakTC41488 | Ca(ICCV2/PI489777)SNP_04814 | 135  | T | C | 5  | 4  | --        | --      |
|            | Ca(ICCV2/PI489777)SNP_04815 | 140  | A | G | 5  | 4  | --        | --      |
| CakTC42527 | Ca(ICCV2/PI489777)SNP_04816 | 808  | C | T | 20 | 13 | --        | --      |
|            | Ca(ICCV2/PI489777)SNP_04817 | 1034 | C | T | 22 | 15 | --        | --      |
|            | Ca(ICCV2/PI489777)SNP_04818 | 1156 | G | A | 17 | 14 | --        | --      |
|            | Ca(ICCV2/PI489777)SNP_04819 | 1576 | G | A | 31 | 11 | --        | --      |
|            | Ca(ICCV2/PI489777)SNP_04820 | 1609 | A | T | 30 | 12 | --        | --      |
| CakTC36204 | Ca(ICCV2/PI489777)SNP_04821 | 1462 | G | A | 4  | 5  | --        | --      |
|            | Ca(ICCV2/PI489777)SNP_04822 | 2089 | C | G | 4  | 5  | --        | --      |
| CakTC41111 | Ca(ICCV2/PI489777)SNP_04823 | 179  | A | C | 8  | 10 | --        | --      |
| CakTC27478 | Ca(ICCV2/PI489777)SNP_04824 | 493  | T | C | 23 | 6  | --        | --      |
|            | Ca(ICCV2/PI489777)SNP_04825 | 901  | G | A | 7  | 5  | --        | --      |
|            | Ca(ICCV2/PI489777)SNP_04826 | 1010 | C | T | 4  | 4  | --        | --      |
|            | Ca(ICCV2/PI489777)SNP_04827 | 2036 | T | C | 55 | 13 | --        | --      |
| CakTC39327 | Ca(ICCV2/PI489777)SNP_04828 | 58   | A | C | 19 | 8  | --        | --      |
|            | Ca(ICCV2/PI489777)SNP_04829 | 91   | C | T | 26 | 5  | --        | --      |
| CakTC30524 | Ca(ICCV2/PI489777)SNP_04830 | 111  | G | A | 3  | 3  | --        | C3H     |
|            | Ca(ICCV2/PI489777)SNP_04831 | 133  | A | G | 3  | 3  | --        | C3H     |
|            | Ca(ICCV2/PI489777)SNP_04832 | 150  | G | T | 3  | 3  | --        | C3H     |
|            | Ca(ICCV2/PI489777)SNP_04833 | 256  | T | C | 5  | 3  | --        | C3H     |
|            | Ca(ICCV2/PI489777)SNP_04834 | 1313 | G | C | 9  | 5  | --        | C3H     |
| CakTC10834 | Ca(ICCV2/PI489777)SNP_04835 | 73   | C | A | 13 | 19 | --        | AUX/IAA |
|            | Ca(ICCV2/PI489777)SNP_04836 | 97   | A | C | 11 | 19 | --        | AUX/IAA |
| CakTC42745 | Ca(ICCV2/PI489777)SNP_04837 | 422  | C | T | 25 | 10 | --        | --      |
|            | Ca(ICCV2/PI489777)SNP_04838 | 747  | A | G | 33 | 19 | --        | --      |
| CakTC41313 | Ca(ICCV2/PI489777)SNP_04839 | 412  | C | G | 13 | 10 | --        | --      |
|            | Ca(ICCV2/PI489777)SNP_04840 | 508  | C | T | 16 | 10 | --        | --      |
|            | Ca(ICCV2/PI489777)SNP_04841 | 2255 | G | A | 10 | 7  | --        | --      |
|            | Ca(ICCV2/PI489777)SNP_04842 | 2306 | A | G | 8  | 6  | --        | --      |
| CakTC11127 | Ca(ICCV2/PI489777)SNP_04843 | 816  | T | C | 8  | 4  | --        | CCHC    |
|            | Ca(ICCV2/PI489777)SNP_04844 | 821  | T | G | 8  | 4  | --        | CCHC    |
|            | Ca(ICCV2/PI489777)SNP_04845 | 1245 | C | T | 7  | 5  | --        | CCHC    |
|            | Ca(ICCV2/PI489777)SNP_04846 | 1606 | A | G | 14 | 4  | --        | CCHC    |
|            | Ca(ICCV2/PI489777)SNP_04847 | 3111 | A | C | 13 | 19 | --        | CCHC    |
| CakTC42957 | Ca(ICCV2/PI489777)SNP_04848 | 1056 | T | C | 15 | 7  | --        | --      |
| CakTC40992 | Ca(ICCV2/PI489777)SNP_04849 | 302  | A | C | 15 | 18 | Young_pod | --      |
|            | Ca(ICCV2/PI489777)SNP_04850 | 473  | T | C | 10 | 12 | Young_pod | --      |
|            | Ca(ICCV2/PI489777)SNP_04851 | 476  | T | G | 10 | 12 | Young_pod | --      |
|            | Ca(ICCV2/PI489777)SNP_04852 | 515  | T | C | 11 | 7  | Young_pod | --      |
|            | Ca(ICCV2/PI489777)SNP_04853 | 528  | C | G | 11 | 7  | Young_pod | --      |
|            | Ca(ICCV2/PI489777)SNP_04854 | 566  | A | G | 10 | 7  | Young_pod | --      |
|            | Ca(ICCV2/PI489777)SNP_04855 | 585  | G | A | 4  | 7  | Young_pod | --      |
| CakTC28405 | Ca(ICCV2/PI489777)SNP_04856 | 118  | A | G | 22 | 5  | --        | --      |
| CakTC42087 | Ca(ICCV2/PI489777)SNP_04857 | 543  | A | T | 24 | 28 | --        | --      |
| CakTC39974 | Ca(ICCV2/PI489777)SNP_04858 | 161  | G | A | 3  | 4  | --        | --      |
|            | Ca(ICCV2/PI489777)SNP_04859 | 916  | T | C | 11 | 3  | --        | --      |
|            | Ca(ICCV2/PI489777)SNP_04860 | 933  | T | C | 11 | 3  | --        | --      |
|            | Ca(ICCV2/PI489777)SNP_04861 | 936  | T | C | 11 | 4  | --        | --      |
|            | Ca(ICCV2/PI489777)SNP_04862 | 948  | A | T | 11 | 4  | --        | --      |
| CakTC40640 | Ca(ICCV2/PI489777)SNP_04863 | 1481 | T | C | 8  | 3  | --        | --      |
|            | Ca(ICCV2/PI489777)SNP_04864 | 1483 | A | G | 8  | 3  | --        | --      |
|            | Ca(ICCV2/PI489777)SNP_04865 | 1876 | A | G | 4  | 9  | --        | --      |
|            | Ca(ICCV2/PI489777)SNP_04866 | 2291 | A | G | 6  | 4  | --        | --      |
|            | Ca(ICCV2/PI489777)SNP_04867 | 2669 | C | T | 6  | 4  | --        | --      |
|            | Ca(ICCV2/PI489777)SNP_04868 | 2717 | G | A | 7  | 5  | --        | --      |
|            | Ca(ICCV2/PI489777)SNP_04869 | 2921 | G | A | 5  | 3  | --        | --      |
| CakTC42019 | Ca(ICCV2/PI489777)SNP_04870 | 157  | A | C | 13 | 4  | --        | TUB     |
|            | Ca(ICCV2/PI489777)SNP_04871 | 388  | G | A | 19 | 20 | --        | TUB     |
|            | Ca(ICCV2/PI489777)SNP_04872 | 421  | C | T | 29 | 23 | --        | TUB     |
| CakTC41481 | Ca(ICCV2/PI489777)SNP_04873 | 1349 | G | A | 7  | 26 | --        | --      |
|            | Ca(ICCV2/PI489777)SNP_04874 | 1822 | C | T | 14 | 6  | --        | --      |
|            | Ca(ICCV2/PI489777)SNP_04875 | 2005 | A | G | 10 | 4  | --        | --      |
| CakTC31023 | Ca(ICCV2/PI489777)SNP_04876 | 628  | G | C | 5  | 5  | --        | --      |
|            | Ca(ICCV2/PI489777)SNP_04877 | 631  | C | T | 5  | 5  | --        | --      |
|            | Ca(ICCV2/PI489777)SNP_04878 | 1708 | G | C | 5  | 5  | --        | --      |
| CakTC43076 | Ca(ICCV2/PI489777)SNP_04879 | 456  | C | T | 3  | 3  | --        | --      |

|            |                            |      |   |   |    |    |           |      |
|------------|----------------------------|------|---|---|----|----|-----------|------|
| CakTC32096 | Ca(ICC2/PI489777)SNP_04880 | 545  | C | T | 6  | 6  | --        | --   |
|            | Ca(ICC2/PI489777)SNP_04881 | 1278 | G | C | 16 | 5  | --        | --   |
|            | Ca(ICC2/PI489777)SNP_04882 | 1308 | T | C | 16 | 5  | --        | --   |
|            | Ca(ICC2/PI489777)SNP_04883 | 1347 | G | A | 16 | 5  | --        | --   |
| CakTC40697 | Ca(ICC2/PI489777)SNP_04884 | 279  | C | T | 77 | 7  | --        | --   |
|            | Ca(ICC2/PI489777)SNP_04885 | 302  | C | A | 67 | 7  | --        | --   |
|            | Ca(ICC2/PI489777)SNP_04886 | 363  | C | T | 59 | 7  | --        | --   |
|            | Ca(ICC2/PI489777)SNP_04887 | 412  | G | T | 21 | 4  | --        | --   |
| CakTC39181 | Ca(ICC2/PI489777)SNP_04888 | 1272 | A | T | 9  | 7  | --        | --   |
| CakTC41198 | Ca(ICC2/PI489777)SNP_04889 | 197  | T | G | 11 | 8  | --        | --   |
|            | Ca(ICC2/PI489777)SNP_04890 | 216  | A | G | 13 | 8  | --        | --   |
| CakTC37207 | Ca(ICC2/PI489777)SNP_04891 | 243  | G | T | 30 | 11 | --        | --   |
| CakTC22678 | Ca(ICC2/PI489777)SNP_04892 | 209  | C | T | 5  | 6  | Young_pod | --   |
| CakTC27562 | Ca(ICC2/PI489777)SNP_04893 | 361  | C | T | 18 | 8  | --        | bZIP |
|            | Ca(ICC2/PI489777)SNP_04894 | 436  | C | T | 15 | 12 | --        | bZIP |
|            | Ca(ICC2/PI489777)SNP_04895 | 1005 | A | G | 28 | 18 | --        | bZIP |
| CakTC39686 | Ca(ICC2/PI489777)SNP_04896 | 376  | A | G | 15 | 3  | --        | --   |
|            | Ca(ICC2/PI489777)SNP_04897 | 780  | A | G | 15 | 5  | --        | --   |
| CakTC42283 | Ca(ICC2/PI489777)SNP_04898 | 151  | G | A | 18 | 11 | --        | --   |
|            | Ca(ICC2/PI489777)SNP_04899 | 189  | T | C | 19 | 11 | --        | --   |
|            | Ca(ICC2/PI489777)SNP_04900 | 795  | A | T | 19 | 14 | --        | --   |
|            | Ca(ICC2/PI489777)SNP_04901 | 955  | C | T | 37 | 24 | --        | --   |
| CakTC40754 | Ca(ICC2/PI489777)SNP_04902 | 1130 | T | C | 6  | 8  | --        | --   |
| CakTC40385 | Ca(ICC2/PI489777)SNP_04903 | 497  | T | A | 5  | 3  | --        | --   |
|            | Ca(ICC2/PI489777)SNP_04904 | 1187 | C | G | 16 | 8  | --        | --   |
|            | Ca(ICC2/PI489777)SNP_04905 | 1348 | C | G | 16 | 7  | --        | --   |
|            | Ca(ICC2/PI489777)SNP_04906 | 1480 | A | G | 15 | 9  | --        | --   |
|            | Ca(ICC2/PI489777)SNP_04907 | 1523 | C | A | 17 | 7  | --        | --   |
|            | Ca(ICC2/PI489777)SNP_04908 | 1570 | A | G | 15 | 6  | --        | --   |
|            | Ca(ICC2/PI489777)SNP_04909 | 1666 | A | C | 16 | 5  | --        | --   |
| CakTC26692 | Ca(ICC2/PI489777)SNP_04910 | 1039 | G | A | 9  | 4  | --        | --   |
| CakTC02697 | Ca(ICC2/PI489777)SNP_04911 | 777  | C | T | 4  | 4  | --        | --   |
| CakTC29786 | Ca(ICC2/PI489777)SNP_04912 | 278  | C | T | 12 | 3  | --        | --   |
|            | Ca(ICC2/PI489777)SNP_04913 | 474  | A | G | 14 | 5  | --        | --   |
|            | Ca(ICC2/PI489777)SNP_04914 | 708  | C | T | 6  | 3  | --        | --   |
|            | Ca(ICC2/PI489777)SNP_04915 | 1234 | C | T | 4  | 3  | --        | --   |
| CakTC11678 | Ca(ICC2/PI489777)SNP_04916 | 985  | C | G | 4  | 5  | --        | --   |
|            | Ca(ICC2/PI489777)SNP_04917 | 1423 | C | T | 14 | 8  | --        | --   |
| CakTC38353 | Ca(ICC2/PI489777)SNP_04918 | 1195 | A | G | 20 | 11 | --        | --   |
|            | Ca(ICC2/PI489777)SNP_04919 | 1252 | C | T | 14 | 7  | --        | --   |
|            | Ca(ICC2/PI489777)SNP_04920 | 1471 | C | A | 12 | 10 | --        | --   |
| CakTC37846 | Ca(ICC2/PI489777)SNP_04921 | 1055 | G | A | 14 | 8  | --        | --   |
|            | Ca(ICC2/PI489777)SNP_04922 | 1088 | A | G | 13 | 8  | --        | --   |
| CakTC06048 | Ca(ICC2/PI489777)SNP_04923 | 1179 | C | T | 3  | 5  | --        | --   |
|            | Ca(ICC2/PI489777)SNP_04924 | 1258 | G | C | 4  | 4  | --        | --   |
|            | Ca(ICC2/PI489777)SNP_04925 | 1391 | T | C | 3  | 3  | --        | --   |
| CakTC43337 | Ca(ICC2/PI489777)SNP_04926 | 85   | C | G | 3  | 4  | --        | --   |
|            | Ca(ICC2/PI489777)SNP_04927 | 182  | C | A | 3  | 10 | --        | --   |
|            | Ca(ICC2/PI489777)SNP_04928 | 381  | A | T | 13 | 8  | --        | --   |
|            | Ca(ICC2/PI489777)SNP_04929 | 1599 | C | T | 10 | 8  | --        | --   |
|            | Ca(ICC2/PI489777)SNP_04930 | 1676 | G | A | 7  | 6  | --        | --   |
| CakTC41629 | Ca(ICC2/PI489777)SNP_04931 | 466  | C | G | 11 | 14 | --        | --   |
|            | Ca(ICC2/PI489777)SNP_04932 | 475  | T | C | 10 | 14 | --        | --   |
|            | Ca(ICC2/PI489777)SNP_04933 | 597  | C | T | 8  | 9  | --        | --   |
| CakTC25815 | Ca(ICC2/PI489777)SNP_04934 | 614  | C | A | 3  | 6  | --        | --   |
| CakTC39186 | Ca(ICC2/PI489777)SNP_04935 | 867  | T | C | 43 | 18 | --        | C3H  |
|            | Ca(ICC2/PI489777)SNP_04936 | 876  | T | A | 43 | 19 | --        | C3H  |
|            | Ca(ICC2/PI489777)SNP_04937 | 1729 | C | T | 3  | 6  | --        | C3H  |
|            | Ca(ICC2/PI489777)SNP_04938 | 1960 | A | G | 4  | 5  | --        | C3H  |
| CakTC40094 | Ca(ICC2/PI489777)SNP_04939 | 1023 | G | T | 4  | 4  | --        | --   |
| CakTC38655 | Ca(ICC2/PI489777)SNP_04940 | 114  | C | T | 7  | 5  | --        | --   |
|            | Ca(ICC2/PI489777)SNP_04941 | 171  | G | A | 9  | 6  | --        | --   |
|            | Ca(ICC2/PI489777)SNP_04942 | 427  | G | T | 11 | 9  | --        | --   |
|            | Ca(ICC2/PI489777)SNP_04943 | 448  | C | T | 10 | 15 | --        | --   |
|            | Ca(ICC2/PI489777)SNP_04944 | 532  | G | A | 14 | 14 | --        | --   |
| CakTC32512 | Ca(ICC2/PI489777)SNP_04945 | 421  | G | A | 4  | 6  | --        | --   |
| CakTC33922 | Ca(ICC2/PI489777)SNP_04946 | 483  | C | T | 31 | 11 | --        | --   |
| CakTC16941 | Ca(ICC2/PI489777)SNP_04947 | 269  | T | C | 3  | 3  | --        | --   |
|            | Ca(ICC2/PI489777)SNP_04948 | 383  | A | G | 3  | 3  | --        | --   |
| CakTC42024 | Ca(ICC2/PI489777)SNP_04949 | 10   | C | G | 6  | 3  | --        | --   |
|            | Ca(ICC2/PI489777)SNP_04950 | 19   | T | C | 6  | 3  | --        | --   |
|            | Ca(ICC2/PI489777)SNP_04951 | 107  | A | G | 13 | 5  | --        | --   |
|            | Ca(ICC2/PI489777)SNP_04952 | 253  | G | A | 22 | 8  | --        | --   |
|            | Ca(ICC2/PI489777)SNP_04953 | 376  | T | A | 19 | 8  | --        | --   |

|            |                            |      |   |   |    |    |        |     |
|------------|----------------------------|------|---|---|----|----|--------|-----|
|            | Ca(ICC2/PI489777)SNP_04954 | 771  | A | C | 11 | 7  | --     | --  |
|            | Ca(ICC2/PI489777)SNP_04955 | 839  | A | G | 15 | 7  | --     | --  |
| CakTC28486 | Ca(ICC2/PI489777)SNP_04956 | 262  | T | A | 8  | 8  | --     | --  |
| CakTC24442 | Ca(ICC2/PI489777)SNP_04957 | 1051 | C | T | 25 | 6  | --     | --  |
|            | Ca(ICC2/PI489777)SNP_04958 | 1064 | C | A | 33 | 6  | --     | --  |
|            | Ca(ICC2/PI489777)SNP_04959 | 1166 | G | T | 27 | 5  | --     | --  |
|            | Ca(ICC2/PI489777)SNP_04960 | 1214 | A | T | 32 | 6  | --     | --  |
| CakTC32330 | Ca(ICC2/PI489777)SNP_04961 | 159  | A | G | 7  | 10 | --     | --  |
|            | Ca(ICC2/PI489777)SNP_04962 | 246  | G | A | 7  | 13 | --     | --  |
|            | Ca(ICC2/PI489777)SNP_04963 | 327  | A | G | 4  | 13 | --     | --  |
|            | Ca(ICC2/PI489777)SNP_04964 | 393  | C | T | 11 | 15 | --     | --  |
|            | Ca(ICC2/PI489777)SNP_04965 | 569  | T | A | 35 | 19 | --     | --  |
|            | Ca(ICC2/PI489777)SNP_04966 | 1059 | A | T | 47 | 24 | --     | --  |
|            | Ca(ICC2/PI489777)SNP_04967 | 1193 | G | T | 49 | 33 | --     | --  |
|            | Ca(ICC2/PI489777)SNP_04968 | 1197 | A | T | 48 | 35 | --     | --  |
|            | Ca(ICC2/PI489777)SNP_04969 | 1212 | G | C | 56 | 35 | --     | --  |
|            | Ca(ICC2/PI489777)SNP_04970 | 1704 | A | T | 30 | 17 | --     | --  |
|            | Ca(ICC2/PI489777)SNP_04971 | 1785 | G | A | 40 | 22 | --     | --  |
|            | Ca(ICC2/PI489777)SNP_04972 | 1807 | T | C | 40 | 21 | --     | --  |
|            | Ca(ICC2/PI489777)SNP_04973 | 2898 | T | C | 37 | 16 | --     | --  |
|            | Ca(ICC2/PI489777)SNP_04974 | 3725 | G | T | 24 | 21 | --     | --  |
| CakTC25122 | Ca(ICC2/PI489777)SNP_04975 | 182  | A | T | 9  | 3  | --     | --  |
|            | Ca(ICC2/PI489777)SNP_04976 | 226  | C | T | 8  | 5  | --     | --  |
|            | Ca(ICC2/PI489777)SNP_04977 | 294  | A | T | 16 | 4  | --     | --  |
|            | Ca(ICC2/PI489777)SNP_04978 | 474  | C | G | 15 | 5  | --     | --  |
|            | Ca(ICC2/PI489777)SNP_04979 | 647  | A | C | 17 | 4  | --     | --  |
| CakTC39041 | Ca(ICC2/PI489777)SNP_04980 | 178  | C | T | 30 | 13 | --     | --  |
|            | Ca(ICC2/PI489777)SNP_04981 | 631  | C | T | 23 | 30 | --     | --  |
| CakTC35005 | Ca(ICC2/PI489777)SNP_04982 | 2046 | G | A | 24 | 5  | --     | --  |
|            | Ca(ICC2/PI489777)SNP_04983 | 2994 | G | A | 21 | 10 | --     | --  |
| CakTC42699 | Ca(ICC2/PI489777)SNP_04984 | 1622 | A | G | 43 | 59 | --     | --  |
|            | Ca(ICC2/PI489777)SNP_04985 | 1833 | T | A | 10 | 9  | --     | --  |
| CakTC40326 | Ca(ICC2/PI489777)SNP_04986 | 606  | C | T | 6  | 4  | --     | --  |
|            | Ca(ICC2/PI489777)SNP_04987 | 1190 | A | T | 17 | 8  | --     | --  |
|            | Ca(ICC2/PI489777)SNP_04988 | 1197 | T | C | 20 | 8  | --     | --  |
|            | Ca(ICC2/PI489777)SNP_04989 | 1202 | T | C | 20 | 8  | --     | --  |
| CakTC40035 | Ca(ICC2/PI489777)SNP_04990 | 648  | T | C | 6  | 11 | --     | --  |
|            | Ca(ICC2/PI489777)SNP_04991 | 972  | G | C | 7  | 6  | --     | --  |
| CakTC37192 | Ca(ICC2/PI489777)SNP_04992 | 743  | C | A | 3  | 12 | --     | --  |
|            | Ca(ICC2/PI489777)SNP_04993 | 794  | G | T | 6  | 10 | --     | --  |
|            | Ca(ICC2/PI489777)SNP_04994 | 1108 | G | A | 7  | 5  | --     | --  |
|            | Ca(ICC2/PI489777)SNP_04995 | 1127 | C | A | 7  | 5  | --     | --  |
|            | Ca(ICC2/PI489777)SNP_04996 | 1128 | A | T | 8  | 5  | --     | --  |
| CakTC24819 | Ca(ICC2/PI489777)SNP_04997 | 846  | A | T | 8  | 3  | Flower | bud |
|            | Ca(ICC2/PI489777)SNP_04998 | 865  | C | G | 9  | 3  | Flower | bud |
| CakTC42638 | Ca(ICC2/PI489777)SNP_04999 | 118  | G | C | 3  | 4  | --     | --  |
|            | Ca(ICC2/PI489777)SNP_05000 | 228  | T | C | 5  | 5  | --     | --  |
|            | Ca(ICC2/PI489777)SNP_05001 | 240  | C | T | 5  | 5  | --     | --  |
|            | Ca(ICC2/PI489777)SNP_05002 | 381  | C | T | 4  | 5  | --     | --  |
|            | Ca(ICC2/PI489777)SNP_05003 | 627  | T | C | 5  | 3  | --     | --  |
| CakTC29965 | Ca(ICC2/PI489777)SNP_05004 | 376  | G | C | 5  | 6  | --     | HB  |
|            | Ca(ICC2/PI489777)SNP_05005 | 767  | T | C | 10 | 4  | --     | HB  |
|            | Ca(ICC2/PI489777)SNP_05006 | 1158 | C | A | 9  | 12 | --     | HB  |
|            | Ca(ICC2/PI489777)SNP_05007 | 1505 | G | A | 13 | 7  | --     | HB  |
|            | Ca(ICC2/PI489777)SNP_05008 | 1531 | C | A | 12 | 8  | --     | HB  |
|            | Ca(ICC2/PI489777)SNP_05009 | 2383 | A | G | 11 | 7  | --     | HB  |
| CakTC39991 | Ca(ICC2/PI489777)SNP_05010 | 134  | T | G | 13 | 9  | --     | --  |
|            | Ca(ICC2/PI489777)SNP_05011 | 557  | C | T | 8  | 4  | --     | --  |
|            | Ca(ICC2/PI489777)SNP_05012 | 572  | T | C | 7  | 3  | --     | --  |
|            | Ca(ICC2/PI489777)SNP_05013 | 584  | C | A | 8  | 3  | --     | --  |
| CakTC36197 | Ca(ICC2/PI489777)SNP_05014 | 256  | T | A | 5  | 4  | --     | --  |
|            | Ca(ICC2/PI489777)SNP_05015 | 313  | G | A | 4  | 4  | --     | --  |
|            | Ca(ICC2/PI489777)SNP_05016 | 1090 | C | T | 8  | 5  | --     | --  |
|            | Ca(ICC2/PI489777)SNP_05017 | 1453 | G | A | 9  | 5  | --     | --  |
|            | Ca(ICC2/PI489777)SNP_05018 | 1473 | T | A | 10 | 5  | --     | --  |
|            | Ca(ICC2/PI489777)SNP_05019 | 1663 | C | T | 9  | 9  | --     | --  |
|            | Ca(ICC2/PI489777)SNP_05020 | 1819 | G | T | 4  | 12 | --     | --  |
|            | Ca(ICC2/PI489777)SNP_05021 | 1873 | T | G | 3  | 11 | --     | --  |
|            | Ca(ICC2/PI489777)SNP_05022 | 2200 | A | G | 6  | 5  | --     | --  |
| CakTC34476 | Ca(ICC2/PI489777)SNP_05023 | 546  | C | T | 7  | 10 | --     | --  |
|            | Ca(ICC2/PI489777)SNP_05024 | 765  | T | C | 3  | 3  | --     | --  |
|            | Ca(ICC2/PI489777)SNP_05025 | 1603 | C | T | 5  | 7  | --     | --  |
|            | Ca(ICC2/PI489777)SNP_05026 | 1739 | A | T | 10 | 9  | --     | --  |
| CakTC42169 | Ca(ICC2/PI489777)SNP_05027 | 515  | A | G | 21 | 16 | --     | --  |

|            |                            |      |   |   |     |    |           |      |
|------------|----------------------------|------|---|---|-----|----|-----------|------|
|            | Ca(ICC2/PI489777)SNP_05028 | 536  | C | T | 20  | 14 | --        | --   |
| CakTC40677 | Ca(ICC2/PI489777)SNP_05029 | 86   | A | G | 3   | 10 | --        | --   |
|            | Ca(ICC2/PI489777)SNP_05030 | 216  | A | T | 7   | 14 | --        | --   |
| CakTC22403 | Ca(ICC2/PI489777)SNP_05031 | 2322 | A | G | 7   | 3  | Flower    | bud  |
| CakTC09647 | Ca(ICC2/PI489777)SNP_05032 | 813  | T | C | 15  | 6  | --        | --   |
| CakTC40504 | Ca(ICC2/PI489777)SNP_05033 | 521  | A | G | 10  | 8  | --        | --   |
| CakTC17684 | Ca(ICC2/PI489777)SNP_05034 | 387  | C | T | 3   | 4  | --        | --   |
| CakTC39280 | Ca(ICC2/PI489777)SNP_05035 | 301  | C | T | 6   | 10 | --        | --   |
|            | Ca(ICC2/PI489777)SNP_05036 | 1229 | G | A | 5   | 7  | --        | --   |
| CakTC37749 | Ca(ICC2/PI489777)SNP_05037 | 605  | C | A | 33  | 19 | --        | --   |
| CakTC11057 | Ca(ICC2/PI489777)SNP_05038 | 221  | A | G | 9   | 8  | --        | --   |
|            | Ca(ICC2/PI489777)SNP_05039 | 298  | G | A | 8   | 9  | --        | --   |
|            | Ca(ICC2/PI489777)SNP_05040 | 709  | G | A | 7   | 7  | --        | --   |
|            | Ca(ICC2/PI489777)SNP_05041 | 1114 | C | A | 5   | 8  | --        | --   |
| CakTC28808 | Ca(ICC2/PI489777)SNP_05042 | 1700 | A | C | 6   | 5  | --        | --   |
| CakTC36584 | Ca(ICC2/PI489777)SNP_05043 | 363  | C | A | 22  | 20 | --        | --   |
|            | Ca(ICC2/PI489777)SNP_05044 | 444  | T | C | 22  | 19 | --        | --   |
|            | Ca(ICC2/PI489777)SNP_05045 | 495  | C | T | 17  | 16 | --        | --   |
|            | Ca(ICC2/PI489777)SNP_05046 | 618  | A | G | 15  | 18 | --        | --   |
|            | Ca(ICC2/PI489777)SNP_05047 | 636  | G | A | 17  | 19 | --        | --   |
|            | Ca(ICC2/PI489777)SNP_05048 | 1554 | G | A | 25  | 19 | --        | --   |
|            | Ca(ICC2/PI489777)SNP_05049 | 2201 | A | G | 34  | 18 | --        | --   |
| CakTC10725 | Ca(ICC2/PI489777)SNP_05050 | 694  | G | C | 8   | 9  | --        | --   |
|            | Ca(ICC2/PI489777)SNP_05051 | 928  | C | T | 22  | 8  | --        | --   |
|            | Ca(ICC2/PI489777)SNP_05052 | 961  | A | G | 20  | 7  | --        | --   |
|            | Ca(ICC2/PI489777)SNP_05053 | 1429 | T | C | 16  | 12 | --        | --   |
|            | Ca(ICC2/PI489777)SNP_05054 | 2335 | A | T | 31  | 39 | --        | --   |
| CakTC23584 | Ca(ICC2/PI489777)SNP_05055 | 2563 | C | T | 8   | 5  | Mature    | Leaf |
|            | Ca(ICC2/PI489777)SNP_05056 | 2732 | C | A | 4   | 7  | Mature    | Leaf |
|            | Ca(ICC2/PI489777)SNP_05057 | 2763 | T | C | 5   | 6  | Mature    | Leaf |
|            | Ca(ICC2/PI489777)SNP_05058 | 2781 | C | T | 5   | 5  | Mature    | Leaf |
| CakTC43340 | Ca(ICC2/PI489777)SNP_05059 | 695  | G | T | 11  | 9  | --        | --   |
|            | Ca(ICC2/PI489777)SNP_05060 | 755  | A | G | 10  | 7  | --        | --   |
|            | Ca(ICC2/PI489777)SNP_05061 | 855  | C | T | 8   | 6  | --        | --   |
| CakTC26020 | Ca(ICC2/PI489777)SNP_05062 | 350  | T | C | 50  | 44 | --        | --   |
|            | Ca(ICC2/PI489777)SNP_05063 | 794  | C | G | 101 | 51 | --        | --   |
| CakTC07722 | Ca(ICC2/PI489777)SNP_05064 | 238  | G | T | 7   | 3  | --        | --   |
| CakTC26174 | Ca(ICC2/PI489777)SNP_05065 | 143  | G | A | 50  | 32 | --        | --   |
|            | Ca(ICC2/PI489777)SNP_05066 | 739  | T | C | 16  | 9  | --        | --   |
|            | Ca(ICC2/PI489777)SNP_05067 | 794  | T | C | 11  | 7  | --        | --   |
| CakTC42233 | Ca(ICC2/PI489777)SNP_05068 | 531  | A | G | 31  | 34 | --        | --   |
|            | Ca(ICC2/PI489777)SNP_05069 | 1062 | C | T | 29  | 20 | --        | --   |
| CakTC42858 | Ca(ICC2/PI489777)SNP_05070 | 69   | A | C | 20  | 10 | --        | --   |
| CakTC20986 | Ca(ICC2/PI489777)SNP_05071 | 200  | T | G | 3   | 5  | --        | --   |
|            | Ca(ICC2/PI489777)SNP_05072 | 222  | G | A | 3   | 5  | --        | --   |
| CakTC36928 | Ca(ICC2/PI489777)SNP_05073 | 1990 | A | T | 17  | 5  | --        | --   |
|            | Ca(ICC2/PI489777)SNP_05074 | 2287 | A | G | 12  | 8  | --        | --   |
|            | Ca(ICC2/PI489777)SNP_05075 | 2554 | A | G | 15  | 5  | --        | --   |
| CakTC42051 | Ca(ICC2/PI489777)SNP_05076 | 556  | G | C | 7   | 5  | Root      | --   |
|            | Ca(ICC2/PI489777)SNP_05077 | 895  | C | T | 6   | 5  | Root      | --   |
|            | Ca(ICC2/PI489777)SNP_05078 | 929  | C | G | 6   | 5  | Root      | --   |
| CakTC34562 | Ca(ICC2/PI489777)SNP_05079 | 602  | C | T | 33  | 9  | --        | --   |
|            | Ca(ICC2/PI489777)SNP_05080 | 812  | T | G | 20  | 6  | --        | --   |
|            | Ca(ICC2/PI489777)SNP_05081 | 1346 | T | C | 24  | 10 | --        | --   |
|            | Ca(ICC2/PI489777)SNP_05082 | 1644 | C | T | 30  | 9  | --        | --   |
|            | Ca(ICC2/PI489777)SNP_05083 | 1742 | C | G | 23  | 7  | --        | --   |
| CakTC11825 | Ca(ICC2/PI489777)SNP_05084 | 1852 | T | C | 4   | 3  | --        | --   |
| CakTC26087 | Ca(ICC2/PI489777)SNP_05085 | 181  | T | C | 8   | 4  | Young_pod | HSF  |
|            | Ca(ICC2/PI489777)SNP_05086 | 305  | G | A | 11  | 3  | Young_pod | HSF  |
|            | Ca(ICC2/PI489777)SNP_05087 | 651  | T | A | 3   | 3  | Young_pod | HSF  |
|            | Ca(ICC2/PI489777)SNP_05088 | 817  | G | A | 6   | 3  | Young_pod | HSF  |
|            | Ca(ICC2/PI489777)SNP_05089 | 1355 | G | A | 13  | 4  | Young_pod | HSF  |
|            | Ca(ICC2/PI489777)SNP_05090 | 1362 | T | C | 12  | 4  | Young_pod | HSF  |
|            | Ca(ICC2/PI489777)SNP_05091 | 1690 | C | T | 9   | 4  | Young_pod | HSF  |
|            | Ca(ICC2/PI489777)SNP_05092 | 1739 | A | G | 13  | 6  | Young_pod | HSF  |
|            | Ca(ICC2/PI489777)SNP_05093 | 1788 | T | C | 15  | 7  | Young_pod | HSF  |
|            | Ca(ICC2/PI489777)SNP_05094 | 1824 | T | C | 15  | 7  | Young_pod | HSF  |
|            | Ca(ICC2/PI489777)SNP_05095 | 2462 | G | C | 10  | 4  | Young_pod | HSF  |
|            | Ca(ICC2/PI489777)SNP_05096 | 2465 | T | C | 10  | 3  | Young_pod | HSF  |
|            | Ca(ICC2/PI489777)SNP_05097 | 2533 | T | C | 12  | 3  | Young_pod | HSF  |
|            | Ca(ICC2/PI489777)SNP_05098 | 2810 | C | T | 10  | 5  | Young_pod | HSF  |
|            | Ca(ICC2/PI489777)SNP_05099 | 2815 | C | T | 10  | 4  | Young_pod | HSF  |
|            | Ca(ICC2/PI489777)SNP_05100 | 2844 | A | G | 12  | 4  | Young_pod | HSF  |
|            | Ca(ICC2/PI489777)SNP_05101 | 2856 | G | C | 11  | 7  | Young_pod | HSF  |

|            |                             |      |   |   |    |    |           |     |
|------------|-----------------------------|------|---|---|----|----|-----------|-----|
|            | Ca(ICCV2/PI489777)SNP_05102 | 2938 | G | A | 14 | 6  | Young_pod | HSF |
|            | Ca(ICCV2/PI489777)SNP_05103 | 2969 | G | A | 13 | 7  | Young_pod | HSF |
|            | Ca(ICCV2/PI489777)SNP_05104 | 3062 | G | A | 8  | 3  | Young_pod | HSF |
|            | Ca(ICCV2/PI489777)SNP_05105 | 3147 | C | T | 9  | 7  | Young_pod | HSF |
| CakTC32567 | Ca(ICCV2/PI489777)SNP_05106 | 614  | G | A | 9  | 4  | --        | HB  |
|            | Ca(ICCV2/PI489777)SNP_05107 | 759  | T | C | 9  | 8  | --        | HB  |
|            | Ca(ICCV2/PI489777)SNP_05108 | 1777 | A | T | 14 | 10 | --        | HB  |
|            | Ca(ICCV2/PI489777)SNP_05109 | 1877 | C | T | 7  | 6  | --        | HB  |
| CakTC26107 | Ca(ICCV2/PI489777)SNP_05110 | 512  | A | T | 13 | 10 | --        | --  |
|            | Ca(ICCV2/PI489777)SNP_05111 | 969  | T | C | 17 | 22 | --        | --  |
|            | Ca(ICCV2/PI489777)SNP_05112 | 1424 | A | G | 7  | 9  | --        | --  |
| CakTC37662 | Ca(ICCV2/PI489777)SNP_05113 | 930  | G | A | 17 | 22 | --        | --  |
|            | Ca(ICCV2/PI489777)SNP_05114 | 941  | A | G | 13 | 21 | --        | --  |
|            | Ca(ICCV2/PI489777)SNP_05115 | 974  | T | A | 11 | 20 | --        | --  |
|            | Ca(ICCV2/PI489777)SNP_05116 | 986  | T | A | 7  | 17 | --        | --  |
| CakTC30619 | Ca(ICCV2/PI489777)SNP_05117 | 322  | G | A | 3  | 7  | --        | --  |
| CakTC35540 | Ca(ICCV2/PI489777)SNP_05118 | 3275 | T | C | 18 | 5  | --        | --  |
| CakTC27975 | Ca(ICCV2/PI489777)SNP_05119 | 526  | T | C | 4  | 3  | --        | --  |
|            | Ca(ICCV2/PI489777)SNP_05120 | 794  | C | G | 9  | 6  | --        | --  |
|            | Ca(ICCV2/PI489777)SNP_05121 | 832  | A | G | 9  | 7  | --        | --  |
|            | Ca(ICCV2/PI489777)SNP_05122 | 956  | G | A | 7  | 6  | --        | --  |
|            | Ca(ICCV2/PI489777)SNP_05123 | 977  | C | A | 8  | 7  | --        | --  |
|            | Ca(ICCV2/PI489777)SNP_05124 | 1046 | C | G | 7  | 6  | --        | --  |
|            | Ca(ICCV2/PI489777)SNP_05125 | 1160 | A | G | 8  | 3  | --        | --  |
| CakTC39072 | Ca(ICCV2/PI489777)SNP_05126 | 574  | G | A | 27 | 11 | --        | --  |
|            | Ca(ICCV2/PI489777)SNP_05127 | 617  | G | A | 31 | 16 | --        | --  |
|            | Ca(ICCV2/PI489777)SNP_05128 | 1031 | G | A | 15 | 15 | --        | --  |
|            | Ca(ICCV2/PI489777)SNP_05129 | 1184 | G | T | 14 | 14 | --        | --  |
|            | Ca(ICCV2/PI489777)SNP_05130 | 1188 | C | T | 15 | 15 | --        | --  |
| CakTC32984 | Ca(ICCV2/PI489777)SNP_05131 | 161  | G | A | 5  | 4  | --        | --  |
|            | Ca(ICCV2/PI489777)SNP_05132 | 258  | A | G | 7  | 4  | --        | --  |
|            | Ca(ICCV2/PI489777)SNP_05133 | 2774 | C | T | 5  | 6  | --        | --  |
| CakTC24812 | Ca(ICCV2/PI489777)SNP_05134 | 210  | G | A | 11 | 6  | --        | --  |
|            | Ca(ICCV2/PI489777)SNP_05135 | 240  | A | G | 11 | 6  | --        | --  |
|            | Ca(ICCV2/PI489777)SNP_05136 | 351  | T | G | 13 | 8  | --        | --  |
|            | Ca(ICCV2/PI489777)SNP_05137 | 359  | G | A | 14 | 8  | --        | --  |
|            | Ca(ICCV2/PI489777)SNP_05138 | 390  | T | C | 15 | 35 | --        | --  |
|            | Ca(ICCV2/PI489777)SNP_05139 | 659  | T | C | 10 | 50 | --        | --  |
|            | Ca(ICCV2/PI489777)SNP_05140 | 731  | T | C | 8  | 48 | --        | --  |
|            | Ca(ICCV2/PI489777)SNP_05141 | 740  | G | A | 7  | 47 | --        | --  |
| CakTC09993 | Ca(ICCV2/PI489777)SNP_05142 | 936  | A | G | 5  | 4  | --        | --  |
|            | Ca(ICCV2/PI489777)SNP_05143 | 1638 | G | A | 3  | 3  | --        | --  |
|            | Ca(ICCV2/PI489777)SNP_05144 | 1937 | T | C | 4  | 9  | --        | --  |
| CakTC22997 | Ca(ICCV2/PI489777)SNP_05145 | 399  | A | C | 7  | 6  | --        | --  |
| CakTC37428 | Ca(ICCV2/PI489777)SNP_05146 | 167  | A | G | 5  | 5  | Root      | --  |
|            | Ca(ICCV2/PI489777)SNP_05147 | 361  | A | C | 10 | 16 | Root      | --  |
|            | Ca(ICCV2/PI489777)SNP_05148 | 565  | C | T | 9  | 12 | Root      | --  |
|            | Ca(ICCV2/PI489777)SNP_05149 | 976  | G | A | 15 | 21 | Root      | --  |
|            | Ca(ICCV2/PI489777)SNP_05150 | 1040 | T | C | 15 | 15 | Root      | --  |
| CakTC23261 | Ca(ICCV2/PI489777)SNP_05151 | 1082 | G | A | 6  | 8  | --        | --  |
|            | Ca(ICCV2/PI489777)SNP_05152 | 1375 | G | A | 6  | 11 | --        | --  |
|            | Ca(ICCV2/PI489777)SNP_05153 | 1987 | G | C | 3  | 3  | --        | --  |
|            | Ca(ICCV2/PI489777)SNP_05154 | 1997 | A | T | 3  | 3  | --        | --  |
| CakTC37688 | Ca(ICCV2/PI489777)SNP_05155 | 90   | T | C | 4  | 4  | --        | --  |
|            | Ca(ICCV2/PI489777)SNP_05156 | 684  | G | A | 15 | 4  | --        | --  |
|            | Ca(ICCV2/PI489777)SNP_05157 | 1081 | G | A | 8  | 3  | --        | --  |
| CakTC09713 | Ca(ICCV2/PI489777)SNP_05158 | 1693 | C | T | 4  | 4  | --        | --  |
|            | Ca(ICCV2/PI489777)SNP_05159 | 1772 | A | C | 6  | 4  | --        | --  |
|            | Ca(ICCV2/PI489777)SNP_05160 | 1871 | T | C | 5  | 4  | --        | --  |
|            | Ca(ICCV2/PI489777)SNP_05161 | 2483 | C | A | 10 | 4  | --        | --  |
|            | Ca(ICCV2/PI489777)SNP_05162 | 2682 | A | G | 8  | 3  | --        | --  |
| CakTC07613 | Ca(ICCV2/PI489777)SNP_05163 | 335  | C | T | 15 | 4  | --        | --  |
|            | Ca(ICCV2/PI489777)SNP_05164 | 398  | G | C | 18 | 4  | --        | --  |
|            | Ca(ICCV2/PI489777)SNP_05165 | 461  | A | G | 19 | 3  | --        | --  |
|            | Ca(ICCV2/PI489777)SNP_05166 | 476  | T | C | 18 | 3  | --        | --  |
|            | Ca(ICCV2/PI489777)SNP_05167 | 731  | T | C | 23 | 6  | --        | --  |
|            | Ca(ICCV2/PI489777)SNP_05168 | 1142 | T | C | 36 | 8  | --        | --  |
|            | Ca(ICCV2/PI489777)SNP_05169 | 1409 | T | G | 24 | 11 | --        | --  |
| CakTC26987 | Ca(ICCV2/PI489777)SNP_05170 | 622  | T | C | 12 | 9  | --        | --  |
|            | Ca(ICCV2/PI489777)SNP_05171 | 640  | G | A | 13 | 9  | --        | --  |
|            | Ca(ICCV2/PI489777)SNP_05172 | 1593 | C | T | 10 | 7  | --        | --  |
|            | Ca(ICCV2/PI489777)SNP_05173 | 1892 | T | G | 5  | 3  | --        | --  |
| CakTC25500 | Ca(ICCV2/PI489777)SNP_05174 | 567  | A | G | 30 | 24 | --        | --  |
|            | Ca(ICCV2/PI489777)SNP_05175 | 1013 | G | A | 15 | 11 | --        | --  |

|            |                            |      |   |   |    |     |           |      |
|------------|----------------------------|------|---|---|----|-----|-----------|------|
| CakTC31417 | Ca(ICC2/PI489777)SNP_05176 | 329  | C | A | 10 | 3   | Young_pod | --   |
|            | Ca(ICC2/PI489777)SNP_05177 | 1810 | A | C | 3  | 4   | Young_pod | --   |
| CakTC28882 | Ca(ICC2/PI489777)SNP_05178 | 292  | T | C | 6  | 6   | --        | --   |
|            | Ca(ICC2/PI489777)SNP_05179 | 447  | T | C | 6  | 11  | --        | --   |
|            | Ca(ICC2/PI489777)SNP_05180 | 694  | G | C | 10 | 7   | --        | --   |
|            | Ca(ICC2/PI489777)SNP_05181 | 708  | C | T | 10 | 6   | --        | --   |
|            | Ca(ICC2/PI489777)SNP_05182 | 765  | A | G | 9  | 4   | --        | --   |
|            | Ca(ICC2/PI489777)SNP_05183 | 804  | C | T | 8  | 4   | --        | --   |
|            | Ca(ICC2/PI489777)SNP_05184 | 822  | T | G | 9  | 3   | --        | --   |
|            | Ca(ICC2/PI489777)SNP_05185 | 863  | C | A | 6  | 4   | --        | --   |
| CakTC22827 | Ca(ICC2/PI489777)SNP_05186 | 1181 | C | T | 8  | 3   | --        | --   |
| CakTC25672 | Ca(ICC2/PI489777)SNP_05187 | 73   | C | A | 25 | 68  | --        | --   |
|            | Ca(ICC2/PI489777)SNP_05188 | 226  | A | G | 72 | 138 | --        | --   |
|            | Ca(ICC2/PI489777)SNP_05189 | 301  | A | T | 56 | 142 | --        | --   |
|            | Ca(ICC2/PI489777)SNP_05190 | 318  | C | T | 90 | 144 | --        | --   |
| CakTC43149 | Ca(ICC2/PI489777)SNP_05191 | 160  | T | G | 6  | 8   | --        | --   |
|            | Ca(ICC2/PI489777)SNP_05192 | 302  | C | T | 11 | 31  | --        | --   |
| CakTC35462 | Ca(ICC2/PI489777)SNP_05193 | 817  | G | A | 17 | 7   | --        | --   |
|            | Ca(ICC2/PI489777)SNP_05194 | 1276 | T | C | 8  | 16  | --        | --   |
|            | Ca(ICC2/PI489777)SNP_05195 | 2384 | C | G | 10 | 6   | --        | --   |
|            | Ca(ICC2/PI489777)SNP_05196 | 2872 | C | T | 17 | 14  | --        | --   |
|            | Ca(ICC2/PI489777)SNP_05197 | 3484 | G | A | 9  | 7   | --        | --   |
|            | Ca(ICC2/PI489777)SNP_05198 | 3798 | T | A | 5  | 6   | --        | --   |
| CakTC29868 | Ca(ICC2/PI489777)SNP_05199 | 851  | T | G | 10 | 11  | --        | --   |
|            | Ca(ICC2/PI489777)SNP_05200 | 1049 | C | T | 11 | 19  | --        | --   |
|            | Ca(ICC2/PI489777)SNP_05201 | 1055 | A | G | 11 | 19  | --        | --   |
|            | Ca(ICC2/PI489777)SNP_05202 | 1328 | T | A | 16 | 14  | --        | --   |
|            | Ca(ICC2/PI489777)SNP_05203 | 1699 | A | T | 7  | 11  | --        | --   |
|            | Ca(ICC2/PI489777)SNP_05204 | 1923 | C | T | 7  | 5   | --        | --   |
|            | Ca(ICC2/PI489777)SNP_05205 | 1951 | G | C | 7  | 5   | --        | --   |
|            | Ca(ICC2/PI489777)SNP_05206 | 1954 | G | C | 7  | 4   | --        | --   |
| CakTC40135 | Ca(ICC2/PI489777)SNP_05207 | 87   | T | C | 8  | 3   | --        | --   |
| CakTC40017 | Ca(ICC2/PI489777)SNP_05208 | 924  | A | G | 14 | 29  | --        | --   |
| CakTC16902 | Ca(ICC2/PI489777)SNP_05209 | 686  | A | C | 20 | 4   | --        | --   |
|            | Ca(ICC2/PI489777)SNP_05210 | 691  | C | G | 19 | 4   | --        | --   |
| CakTC42424 | Ca(ICC2/PI489777)SNP_05211 | 166  | G | A | 10 | 3   | --        | --   |
|            | Ca(ICC2/PI489777)SNP_05212 | 206  | C | T | 12 | 4   | --        | --   |
| CakTC42214 | Ca(ICC2/PI489777)SNP_05213 | 642  | T | C | 12 | 18  | --        | --   |
| CakTC38648 | Ca(ICC2/PI489777)SNP_05214 | 871  | C | A | 5  | 8   | --        | ULT  |
| CakTC24513 | Ca(ICC2/PI489777)SNP_05215 | 894  | T | C | 5  | 5   | --        | bZIP |
| CakTC41055 | Ca(ICC2/PI489777)SNP_05216 | 184  | T | C | 12 | 4   | --        | --   |
|            | Ca(ICC2/PI489777)SNP_05217 | 196  | A | C | 12 | 4   | --        | --   |
|            | Ca(ICC2/PI489777)SNP_05218 | 444  | G | A | 10 | 6   | --        | --   |
|            | Ca(ICC2/PI489777)SNP_05219 | 546  | G | C | 4  | 4   | --        | --   |
| CakTC23990 | Ca(ICC2/PI489777)SNP_05220 | 351  | C | T | 14 | 3   | --        | --   |
|            | Ca(ICC2/PI489777)SNP_05221 | 879  | C | T | 6  | 7   | --        | --   |
|            | Ca(ICC2/PI489777)SNP_05222 | 1035 | A | C | 4  | 6   | --        | --   |
| CakTC33457 | Ca(ICC2/PI489777)SNP_05223 | 494  | T | A | 15 | 10  | --        | --   |
| CakTC34443 | Ca(ICC2/PI489777)SNP_05224 | 113  | A | T | 15 | 7   | --        | --   |
|            | Ca(ICC2/PI489777)SNP_05225 | 159  | C | T | 19 | 8   | --        | --   |
|            | Ca(ICC2/PI489777)SNP_05226 | 179  | T | C | 18 | 8   | --        | --   |
|            | Ca(ICC2/PI489777)SNP_05227 | 197  | T | C | 18 | 7   | --        | --   |
| CakTC30317 | Ca(ICC2/PI489777)SNP_05228 | 180  | A | G | 9  | 12  | Shoot     | --   |
|            | Ca(ICC2/PI489777)SNP_05229 | 292  | C | T | 15 | 6   | Shoot     | --   |
|            | Ca(ICC2/PI489777)SNP_05230 | 370  | A | T | 15 | 11  | Shoot     | --   |
|            | Ca(ICC2/PI489777)SNP_05231 | 492  | C | T | 13 | 10  | Shoot     | --   |
|            | Ca(ICC2/PI489777)SNP_05232 | 800  | C | G | 23 | 10  | Shoot     | --   |
| CakTC25599 | Ca(ICC2/PI489777)SNP_05233 | 207  | C | G | 88 | 82  | --        | --   |
| CakTC43034 | Ca(ICC2/PI489777)SNP_05234 | 139  | A | G | 3  | 4   | --        | --   |
|            | Ca(ICC2/PI489777)SNP_05235 | 186  | G | A | 5  | 4   | --        | --   |
|            | Ca(ICC2/PI489777)SNP_05236 | 430  | A | T | 9  | 5   | --        | --   |
| CakTC37406 | Ca(ICC2/PI489777)SNP_05237 | 74   | C | T | 18 | 5   | --        | --   |
| CakTC29527 | Ca(ICC2/PI489777)SNP_05238 | 1527 | G | A | 7  | 9   | --        | --   |
|            | Ca(ICC2/PI489777)SNP_05239 | 1534 | G | A | 7  | 9   | --        | --   |
|            | Ca(ICC2/PI489777)SNP_05240 | 1560 | G | A | 7  | 9   | --        | --   |
| CakTC26258 | Ca(ICC2/PI489777)SNP_05241 | 17   | G | T | 35 | 10  | --        | --   |
|            | Ca(ICC2/PI489777)SNP_05242 | 57   | G | T | 64 | 16  | --        | --   |
|            | Ca(ICC2/PI489777)SNP_05243 | 63   | A | T | 61 | 17  | --        | --   |
|            | Ca(ICC2/PI489777)SNP_05244 | 184  | G | T | 71 | 30  | --        | --   |
|            | Ca(ICC2/PI489777)SNP_05245 | 196  | A | G | 75 | 31  | --        | --   |
|            | Ca(ICC2/PI489777)SNP_05246 | 1793 | A | G | 89 | 89  | --        | --   |
| CakTC04785 | Ca(ICC2/PI489777)SNP_05247 | 497  | T | C | 10 | 13  | --        | --   |
|            | Ca(ICC2/PI489777)SNP_05248 | 569  | T | C | 15 | 19  | --        | --   |
|            | Ca(ICC2/PI489777)SNP_05249 | 602  | C | T | 18 | 18  | --        | --   |

|            |                            |      |   |   |    |    |        |            |
|------------|----------------------------|------|---|---|----|----|--------|------------|
|            | Ca(ICC2/PI489777)SNP_05250 | 899  | T | C | 23 | 17 | --     | --         |
|            | Ca(ICC2/PI489777)SNP_05251 | 1157 | C | T | 29 | 23 | --     | --         |
| CakTC39298 | Ca(ICC2/PI489777)SNP_05252 | 104  | G | C | 19 | 9  | --     | --         |
|            | Ca(ICC2/PI489777)SNP_05253 | 371  | G | A | 26 | 11 | --     | --         |
| CakTC30319 | Ca(ICC2/PI489777)SNP_05254 | 388  | C | T | 3  | 6  | --     | --         |
| CakTC31505 | Ca(ICC2/PI489777)SNP_05255 | 366  | C | T | 3  | 4  | --     | --         |
|            | Ca(ICC2/PI489777)SNP_05256 | 600  | A | G | 3  | 4  | --     | --         |
|            | Ca(ICC2/PI489777)SNP_05257 | 774  | G | A | 3  | 7  | --     | --         |
|            | Ca(ICC2/PI489777)SNP_05258 | 783  | C | T | 3  | 7  | --     | --         |
|            | Ca(ICC2/PI489777)SNP_05259 | 787  | G | A | 3  | 7  | --     | --         |
| CakTC30024 | Ca(ICC2/PI489777)SNP_05260 | 595  | A | G | 9  | 4  | --     | Alfin-like |
|            | Ca(ICC2/PI489777)SNP_05261 | 1171 | C | T | 13 | 9  | --     | Alfin-like |
|            | Ca(ICC2/PI489777)SNP_05262 | 2551 | T | C | 12 | 9  | --     | Alfin-like |
|            | Ca(ICC2/PI489777)SNP_05263 | 2774 | C | T | 12 | 6  | --     | Alfin-like |
|            | Ca(ICC2/PI489777)SNP_05264 | 2923 | C | T | 16 | 5  | --     | Alfin-like |
| CakTC34589 | Ca(ICC2/PI489777)SNP_05265 | 125  | A | C | 17 | 17 | --     | --         |
|            | Ca(ICC2/PI489777)SNP_05266 | 219  | C | A | 22 | 26 | --     | --         |
|            | Ca(ICC2/PI489777)SNP_05267 | 1124 | G | C | 35 | 14 | --     | --         |
|            | Ca(ICC2/PI489777)SNP_05268 | 1589 | G | A | 14 | 35 | --     | --         |
|            | Ca(ICC2/PI489777)SNP_05269 | 1811 | G | A | 18 | 32 | --     | --         |
|            | Ca(ICC2/PI489777)SNP_05270 | 2093 | G | T | 11 | 7  | --     | --         |
| CakTC33153 | Ca(ICC2/PI489777)SNP_05271 | 19   | C | G | 7  | 3  | --     | --         |
|            | Ca(ICC2/PI489777)SNP_05272 | 60   | A | G | 10 | 5  | --     | --         |
|            | Ca(ICC2/PI489777)SNP_05273 | 636  | T | C | 31 | 20 | --     | --         |
|            | Ca(ICC2/PI489777)SNP_05274 | 789  | T | C | 34 | 25 | --     | --         |
|            | Ca(ICC2/PI489777)SNP_05275 | 930  | C | T | 36 | 29 | --     | --         |
|            | Ca(ICC2/PI489777)SNP_05276 | 1208 | C | G | 29 | 23 | --     | --         |
|            | Ca(ICC2/PI489777)SNP_05277 | 2259 | C | G | 24 | 10 | --     | --         |
|            | Ca(ICC2/PI489777)SNP_05278 | 3078 | T | A | 22 | 20 | --     | --         |
|            | Ca(ICC2/PI489777)SNP_05279 | 4741 | G | A | 16 | 11 | --     | --         |
|            | Ca(ICC2/PI489777)SNP_05280 | 4815 | T | G | 9  | 8  | --     | --         |
| CakTC40005 | Ca(ICC2/PI489777)SNP_05281 | 190  | C | T | 9  | 4  | Mature | Leaf       |
|            | Ca(ICC2/PI489777)SNP_05282 | 198  | C | T | 8  | 4  | Mature | Leaf       |
|            | Ca(ICC2/PI489777)SNP_05283 | 218  | C | T | 7  | 4  | Mature | Leaf       |
|            | Ca(ICC2/PI489777)SNP_05284 | 872  | T | C | 10 | 8  | Mature | Leaf       |
|            | Ca(ICC2/PI489777)SNP_05285 | 948  | G | C | 5  | 5  | Mature | Leaf       |
| CakTC37569 | Ca(ICC2/PI489777)SNP_05286 | 331  | T | C | 9  | 9  | --     | --         |
|            | Ca(ICC2/PI489777)SNP_05287 | 804  | A | G | 5  | 13 | --     | --         |
| CakTC42953 | Ca(ICC2/PI489777)SNP_05288 | 154  | A | T | 27 | 9  | --     | --         |
|            | Ca(ICC2/PI489777)SNP_05289 | 1164 | G | A | 24 | 4  | --     | --         |
|            | Ca(ICC2/PI489777)SNP_05290 | 1369 | T | C | 14 | 19 | --     | --         |
| CakTC26104 | Ca(ICC2/PI489777)SNP_05291 | 1577 | G | A | 13 | 10 | --     | --         |
| CakTC27255 | Ca(ICC2/PI489777)SNP_05292 | 569  | T | C | 11 | 4  | --     | --         |
|            | Ca(ICC2/PI489777)SNP_05293 | 693  | C | T | 10 | 3  | --     | --         |
| CakTC39549 | Ca(ICC2/PI489777)SNP_05294 | 150  | C | T | 44 | 15 | --     | --         |
|            | Ca(ICC2/PI489777)SNP_05295 | 268  | C | T | 55 | 17 | --     | --         |
|            | Ca(ICC2/PI489777)SNP_05296 | 1205 | T | C | 9  | 6  | --     | --         |
| CakTC42825 | Ca(ICC2/PI489777)SNP_05297 | 550  | G | T | 47 | 57 | --     | --         |
| CakTC42035 | Ca(ICC2/PI489777)SNP_05298 | 12   | T | C | 6  | 4  | --     | --         |
|            | Ca(ICC2/PI489777)SNP_05299 | 13   | C | T | 6  | 4  | --     | --         |
|            | Ca(ICC2/PI489777)SNP_05300 | 44   | T | C | 7  | 11 | --     | --         |
|            | Ca(ICC2/PI489777)SNP_05301 | 73   | T | C | 8  | 13 | --     | --         |
|            | Ca(ICC2/PI489777)SNP_05302 | 203  | C | T | 9  | 17 | --     | --         |
|            | Ca(ICC2/PI489777)SNP_05303 | 632  | T | C | 17 | 7  | --     | --         |
|            | Ca(ICC2/PI489777)SNP_05304 | 1295 | G | T | 11 | 10 | --     | --         |
|            | Ca(ICC2/PI489777)SNP_05305 | 1307 | A | G | 8  | 9  | --     | --         |
|            | Ca(ICC2/PI489777)SNP_05306 | 1313 | G | T | 11 | 9  | --     | --         |
|            | Ca(ICC2/PI489777)SNP_05307 | 1517 | A | T | 9  | 11 | --     | --         |
| CakTC30253 | Ca(ICC2/PI489777)SNP_05308 | 700  | C | T | 3  | 3  | --     | --         |
|            | Ca(ICC2/PI489777)SNP_05309 | 701  | A | G | 3  | 3  | --     | --         |
| CakTC43163 | Ca(ICC2/PI489777)SNP_05310 | 698  | C | T | 3  | 3  | --     | --         |
| CakTC30320 | Ca(ICC2/PI489777)SNP_05311 | 843  | G | C | 7  | 10 | --     | --         |
|            | Ca(ICC2/PI489777)SNP_05312 | 846  | A | G | 7  | 10 | --     | --         |
|            | Ca(ICC2/PI489777)SNP_05313 | 1278 | C | T | 6  | 10 | --     | --         |
|            | Ca(ICC2/PI489777)SNP_05314 | 1331 | T | C | 8  | 8  | --     | --         |
|            | Ca(ICC2/PI489777)SNP_05315 | 1425 | C | G | 8  | 11 | --     | --         |
|            | Ca(ICC2/PI489777)SNP_05316 | 1458 | G | A | 8  | 12 | --     | --         |
|            | Ca(ICC2/PI489777)SNP_05317 | 2034 | A | G | 4  | 9  | --     | --         |
|            | Ca(ICC2/PI489777)SNP_05318 | 2101 | C | G | 6  | 10 | --     | --         |
| CakTC29908 | Ca(ICC2/PI489777)SNP_05319 | 828  | G | A | 5  | 7  | --     | --         |
|            | Ca(ICC2/PI489777)SNP_05320 | 2089 | A | G | 3  | 3  | --     | --         |
|            | Ca(ICC2/PI489777)SNP_05321 | 2823 | T | C | 7  | 11 | --     | --         |
| CakTC24674 | Ca(ICC2/PI489777)SNP_05322 | 283  | T | C | 10 | 5  | --     | --         |
|            | Ca(ICC2/PI489777)SNP_05323 | 285  | C | G | 10 | 5  | --     | --         |



|            |                            |      |   |   |    |    |    |    |
|------------|----------------------------|------|---|---|----|----|----|----|
|            | Ca(ICC2/PI489777)SNP_05324 | 1485 | T | C | 3  | 3  | -- | -- |
| CakTC39660 | Ca(ICC2/PI489777)SNP_05325 | 312  | C | A | 10 | 5  | -- | -- |
|            | Ca(ICC2/PI489777)SNP_05326 | 384  | G | A | 16 | 7  | -- | -- |
|            | Ca(ICC2/PI489777)SNP_05327 | 415  | G | A | 15 | 7  | -- | -- |
|            | Ca(ICC2/PI489777)SNP_05328 | 462  | T | C | 14 | 4  | -- | -- |
|            | Ca(ICC2/PI489777)SNP_05329 | 567  | C | T | 14 | 3  | -- | -- |
|            | Ca(ICC2/PI489777)SNP_05330 | 894  | A | G | 18 | 8  | -- | -- |
| CakTC43014 | Ca(ICC2/PI489777)SNP_05331 | 1232 | A | G | 9  | 9  | -- | -- |
|            | Ca(ICC2/PI489777)SNP_05332 | 1320 | G | A | 5  | 9  | -- | -- |
|            | Ca(ICC2/PI489777)SNP_05333 | 1570 | C | G | 7  | 3  | -- | -- |
| CakTC38049 | Ca(ICC2/PI489777)SNP_05334 | 303  | G | T | 19 | 13 | -- | -- |
| CakTC30976 | Ca(ICC2/PI489777)SNP_05335 | 1155 | G | A | 4  | 3  | -- | -- |
| CakTC39588 | Ca(ICC2/PI489777)SNP_05336 | 1510 | A | G | 5  | 4  | -- | -- |
| CakTC27115 | Ca(ICC2/PI489777)SNP_05337 | 144  | G | C | 14 | 9  | -- | -- |
| CakTC28730 | Ca(ICC2/PI489777)SNP_05338 | 72   | C | G | 41 | 14 | -- | -- |
| CakTC41753 | Ca(ICC2/PI489777)SNP_05339 | 430  | G | T | 13 | 22 | -- | -- |
|            | Ca(ICC2/PI489777)SNP_05340 | 463  | C | T | 13 | 20 | -- | -- |
|            | Ca(ICC2/PI489777)SNP_05341 | 660  | C | T | 14 | 18 | -- | -- |
|            | Ca(ICC2/PI489777)SNP_05342 | 747  | A | G | 9  | 11 | -- | -- |
|            | Ca(ICC2/PI489777)SNP_05343 | 770  | C | T | 6  | 9  | -- | -- |
| CakTC39197 | Ca(ICC2/PI489777)SNP_05344 | 729  | G | A | 15 | 3  | -- | -- |
|            | Ca(ICC2/PI489777)SNP_05345 | 864  | T | A | 15 | 8  | -- | -- |
| CakTC42603 | Ca(ICC2/PI489777)SNP_05346 | 242  | C | T | 6  | 5  | -- | -- |
| CakTC38750 | Ca(ICC2/PI489777)SNP_05347 | 84   | T | C | 8  | 3  | -- | -- |
|            | Ca(ICC2/PI489777)SNP_05348 | 321  | G | A | 13 | 8  | -- | -- |
|            | Ca(ICC2/PI489777)SNP_05349 | 499  | C | T | 12 | 7  | -- | -- |
|            | Ca(ICC2/PI489777)SNP_05350 | 663  | G | A | 6  | 5  | -- | -- |
|            | Ca(ICC2/PI489777)SNP_05351 | 721  | T | C | 7  | 8  | -- | -- |
|            | Ca(ICC2/PI489777)SNP_05352 | 1074 | A | G | 15 | 7  | -- | -- |
|            | Ca(ICC2/PI489777)SNP_05353 | 1095 | G | A | 14 | 8  | -- | -- |
|            | Ca(ICC2/PI489777)SNP_05354 | 1138 | C | T | 14 | 7  | -- | -- |
|            | Ca(ICC2/PI489777)SNP_05355 | 1149 | G | T | 14 | 4  | -- | -- |
| CakTC39928 | Ca(ICC2/PI489777)SNP_05356 | 357  | T | A | 17 | 11 | -- | -- |
|            | Ca(ICC2/PI489777)SNP_05357 | 1002 | T | C | 9  | 3  | -- | -- |
| CakTC33656 | Ca(ICC2/PI489777)SNP_05358 | 1839 | C | T | 12 | 6  | -- | -- |
|            | Ca(ICC2/PI489777)SNP_05359 | 3037 | A | T | 8  | 5  | -- | -- |
|            | Ca(ICC2/PI489777)SNP_05360 | 3721 | T | C | 5  | 14 | -- | -- |
|            | Ca(ICC2/PI489777)SNP_05361 | 5224 | C | T | 12 | 8  | -- | -- |
|            | Ca(ICC2/PI489777)SNP_05362 | 5647 | G | A | 11 | 17 | -- | -- |
| CakTC34039 | Ca(ICC2/PI489777)SNP_05363 | 176  | C | T | 30 | 16 | -- | -- |
|            | Ca(ICC2/PI489777)SNP_05364 | 272  | T | C | 35 | 19 | -- | -- |
|            | Ca(ICC2/PI489777)SNP_05365 | 1349 | T | C | 9  | 22 | -- | -- |
|            | Ca(ICC2/PI489777)SNP_05366 | 1586 | G | A | 19 | 24 | -- | -- |
|            | Ca(ICC2/PI489777)SNP_05367 | 1595 | A | C | 19 | 32 | -- | -- |
|            | Ca(ICC2/PI489777)SNP_05368 | 1604 | T | G | 22 | 29 | -- | -- |
|            | Ca(ICC2/PI489777)SNP_05369 | 1853 | C | T | 17 | 16 | -- | -- |
| CakTC14884 | Ca(ICC2/PI489777)SNP_05370 | 340  | G | A | 5  | 3  | -- | -- |
|            | Ca(ICC2/PI489777)SNP_05371 | 884  | C | A | 12 | 5  | -- | -- |
|            | Ca(ICC2/PI489777)SNP_05372 | 1019 | T | A | 7  | 4  | -- | -- |
|            | Ca(ICC2/PI489777)SNP_05373 | 1046 | T | C | 5  | 3  | -- | -- |
| CakTC29416 | Ca(ICC2/PI489777)SNP_05374 | 609  | T | C | 64 | 43 | -- | -- |
|            | Ca(ICC2/PI489777)SNP_05375 | 678  | C | T | 63 | 36 | -- | -- |
|            | Ca(ICC2/PI489777)SNP_05376 | 890  | C | A | 38 | 24 | -- | -- |
| CakTC37439 | Ca(ICC2/PI489777)SNP_05377 | 489  | A | G | 46 | 14 | -- | -- |
|            | Ca(ICC2/PI489777)SNP_05378 | 549  | G | T | 44 | 15 | -- | -- |
|            | Ca(ICC2/PI489777)SNP_05379 | 672  | A | C | 34 | 17 | -- | -- |
|            | Ca(ICC2/PI489777)SNP_05380 | 1095 | A | G | 23 | 13 | -- | -- |
|            | Ca(ICC2/PI489777)SNP_05381 | 1149 | A | G | 46 | 15 | -- | -- |
| CakTC21118 | Ca(ICC2/PI489777)SNP_05382 | 187  | T | A | 10 | 4  | -- | -- |
|            | Ca(ICC2/PI489777)SNP_05383 | 647  | A | G | 22 | 11 | -- | -- |
| CakTC40104 | Ca(ICC2/PI489777)SNP_05384 | 656  | C | T | 3  | 3  | -- | -- |
| CakTC29950 | Ca(ICC2/PI489777)SNP_05385 | 35   | C | T | 16 | 5  | -- | -- |
|            | Ca(ICC2/PI489777)SNP_05386 | 703  | T | C | 26 | 14 | -- | -- |
|            | Ca(ICC2/PI489777)SNP_05387 | 1003 | C | T | 29 | 18 | -- | -- |
|            | Ca(ICC2/PI489777)SNP_05388 | 1011 | C | A | 29 | 23 | -- | -- |
| CakTC33228 | Ca(ICC2/PI489777)SNP_05389 | 355  | G | T | 7  | 18 | -- | -- |
|            | Ca(ICC2/PI489777)SNP_05390 | 478  | C | T | 14 | 20 | -- | -- |
|            | Ca(ICC2/PI489777)SNP_05391 | 1199 | G | A | 17 | 10 | -- | -- |
| CakTC23772 | Ca(ICC2/PI489777)SNP_05392 | 650  | C | A | 29 | 6  | -- | -- |
|            | Ca(ICC2/PI489777)SNP_05393 | 1260 | T | C | 15 | 4  | -- | -- |
|            | Ca(ICC2/PI489777)SNP_05394 | 1268 | G | A | 17 | 4  | -- | -- |
|            | Ca(ICC2/PI489777)SNP_05395 | 1566 | T | C | 11 | 3  | -- | -- |
|            | Ca(ICC2/PI489777)SNP_05396 | 2775 | C | G | 13 | 5  | -- | -- |
|            | Ca(ICC2/PI489777)SNP_05397 | 3250 | C | G | 19 | 11 | -- | -- |

|            |                            |      |   |   |    |    |        |           |
|------------|----------------------------|------|---|---|----|----|--------|-----------|
|            | Ca(ICC2/PI489777)SNP_05398 | 3440 | C | T | 13 | 8  | --     | --        |
| CakTC37677 | Ca(ICC2/PI489777)SNP_05399 | 648  | C | T | 14 | 8  | Mature | Leaf      |
|            | Ca(ICC2/PI489777)SNP_05400 | 652  | G | A | 13 | 8  | Mature | Leaf      |
|            | Ca(ICC2/PI489777)SNP_05401 | 1170 | C | T | 4  | 3  | Mature | Leaf      |
| CakTC14908 | Ca(ICC2/PI489777)SNP_05402 | 186  | C | G | 4  | 3  | --     | --        |
| CakTC34318 | Ca(ICC2/PI489777)SNP_05403 | 1133 | C | T | 22 | 8  | --     | --        |
|            | Ca(ICC2/PI489777)SNP_05404 | 1681 | G | A | 12 | 4  | --     | --        |
|            | Ca(ICC2/PI489777)SNP_05405 | 1691 | C | T | 12 | 4  | --     | --        |
| CakTC38062 | Ca(ICC2/PI489777)SNP_05406 | 82   | A | G | 13 | 24 | --     | --        |
|            | Ca(ICC2/PI489777)SNP_05407 | 444  | C | T | 18 | 53 | --     | --        |
|            | Ca(ICC2/PI489777)SNP_05408 | 639  | T | C | 15 | 41 | --     | --        |
|            | Ca(ICC2/PI489777)SNP_05409 | 777  | T | C | 11 | 32 | --     | --        |
|            | Ca(ICC2/PI489777)SNP_05410 | 859  | C | G | 10 | 24 | --     | --        |
|            | Ca(ICC2/PI489777)SNP_05411 | 994  | C | T | 4  | 11 | --     | --        |
| CakTC24174 | Ca(ICC2/PI489777)SNP_05412 | 111  | T | C | 4  | 7  | --     | --        |
|            | Ca(ICC2/PI489777)SNP_05413 | 272  | A | T | 6  | 6  | --     | --        |
|            | Ca(ICC2/PI489777)SNP_05414 | 1087 | T | C | 13 | 14 | --     | --        |
| CakTC11060 | Ca(ICC2/PI489777)SNP_05415 | 372  | G | T | 9  | 7  | --     | --        |
| CakTC29979 | Ca(ICC2/PI489777)SNP_05416 | 23   | G | A | 4  | 3  | --     | --        |
|            | Ca(ICC2/PI489777)SNP_05417 | 132  | T | C | 18 | 9  | --     | --        |
|            | Ca(ICC2/PI489777)SNP_05418 | 1246 | C | T | 39 | 10 | --     | --        |
| CakTC27529 | Ca(ICC2/PI489777)SNP_05419 | 350  | G | T | 33 | 27 | --     | AP2-EREBP |
|            | Ca(ICC2/PI489777)SNP_05420 | 729  | T | C | 29 | 14 | --     | AP2-EREBP |
|            | Ca(ICC2/PI489777)SNP_05421 | 885  | C | A | 31 | 9  | --     | AP2-EREBP |
| CakTC34079 | Ca(ICC2/PI489777)SNP_05422 | 1977 | A | T | 11 | 10 | --     | --        |
| CakTC34537 | Ca(ICC2/PI489777)SNP_05423 | 546  | A | T | 4  | 7  | --     | --        |
| CakTC32559 | Ca(ICC2/PI489777)SNP_05424 | 257  | G | A | 30 | 26 | --     | --        |
| CakTC29752 | Ca(ICC2/PI489777)SNP_05425 | 541  | A | G | 3  | 6  | --     | --        |
| CakTC34886 | Ca(ICC2/PI489777)SNP_05426 | 311  | C | T | 5  | 3  | --     | --        |
| CakTC39092 | Ca(ICC2/PI489777)SNP_05427 | 417  | T | A | 33 | 17 | --     | --        |
|            | Ca(ICC2/PI489777)SNP_05428 | 612  | A | G | 24 | 16 | --     | --        |
|            | Ca(ICC2/PI489777)SNP_05429 | 707  | G | T | 24 | 6  | --     | --        |
|            | Ca(ICC2/PI489777)SNP_05430 | 953  | T | C | 17 | 5  | --     | --        |
| CakTC24063 | Ca(ICC2/PI489777)SNP_05431 | 707  | A | C | 5  | 4  | --     | --        |
| CakTC40924 | Ca(ICC2/PI489777)SNP_05432 | 235  | C | T | 11 | 29 | --     | --        |
|            | Ca(ICC2/PI489777)SNP_05433 | 259  | A | C | 12 | 27 | --     | --        |
|            | Ca(ICC2/PI489777)SNP_05434 | 343  | A | T | 12 | 26 | --     | --        |
|            | Ca(ICC2/PI489777)SNP_05435 | 502  | T | A | 14 | 32 | --     | --        |
|            | Ca(ICC2/PI489777)SNP_05436 | 573  | G | A | 13 | 16 | --     | --        |
|            | Ca(ICC2/PI489777)SNP_05437 | 580  | T | C | 11 | 23 | --     | --        |
|            | Ca(ICC2/PI489777)SNP_05438 | 1910 | A | G | 11 | 13 | --     | --        |
| CakTC33809 | Ca(ICC2/PI489777)SNP_05439 | 112  | T | A | 8  | 22 | --     | --        |
|            | Ca(ICC2/PI489777)SNP_05440 | 190  | G | A | 15 | 38 | --     | --        |
|            | Ca(ICC2/PI489777)SNP_05441 | 601  | C | G | 25 | 24 | --     | --        |
| CakTC29664 | Ca(ICC2/PI489777)SNP_05442 | 93   | C | T | 5  | 5  | --     | --        |
|            | Ca(ICC2/PI489777)SNP_05443 | 169  | A | G | 5  | 6  | --     | --        |
|            | Ca(ICC2/PI489777)SNP_05444 | 243  | T | C | 5  | 6  | --     | --        |
|            | Ca(ICC2/PI489777)SNP_05445 | 292  | G | T | 6  | 8  | --     | --        |
|            | Ca(ICC2/PI489777)SNP_05446 | 429  | G | A | 4  | 5  | --     | --        |
| CakTC10633 | Ca(ICC2/PI489777)SNP_05447 | 933  | C | T | 5  | 5  | --     | --        |
|            | Ca(ICC2/PI489777)SNP_05448 | 955  | T | A | 5  | 5  | --     | --        |
|            | Ca(ICC2/PI489777)SNP_05449 | 987  | G | T | 3  | 5  | --     | --        |
|            | Ca(ICC2/PI489777)SNP_05450 | 1014 | A | C | 3  | 3  | --     | --        |
|            | Ca(ICC2/PI489777)SNP_05451 | 1309 | C | T | 3  | 4  | --     | --        |
|            | Ca(ICC2/PI489777)SNP_05452 | 1365 | C | T | 6  | 4  | --     | --        |
| CakTC39291 | Ca(ICC2/PI489777)SNP_05453 | 66   | G | A | 4  | 3  | --     | --        |
|            | Ca(ICC2/PI489777)SNP_05454 | 194  | T | C | 5  | 4  | --     | --        |
|            | Ca(ICC2/PI489777)SNP_05455 | 987  | T | G | 8  | 4  | --     | --        |
| CakTC07516 | Ca(ICC2/PI489777)SNP_05456 | 680  | A | G | 5  | 10 | --     | --        |
| CakTC09736 | Ca(ICC2/PI489777)SNP_05457 | 420  | C | T | 5  | 5  | --     | --        |
| CakTC23458 | Ca(ICC2/PI489777)SNP_05458 | 849  | A | C | 9  | 3  | --     | CCHC      |
|            | Ca(ICC2/PI489777)SNP_05459 | 873  | A | G | 7  | 4  | --     | CCHC      |
|            | Ca(ICC2/PI489777)SNP_05460 | 875  | C | T | 9  | 4  | --     | CCHC      |
|            | Ca(ICC2/PI489777)SNP_05461 | 893  | G | T | 8  | 4  | --     | CCHC      |
| CakTC28908 | Ca(ICC2/PI489777)SNP_05462 | 356  | A | G | 5  | 3  | --     | --        |
|            | Ca(ICC2/PI489777)SNP_05463 | 650  | T | C | 7  | 8  | --     | --        |
|            | Ca(ICC2/PI489777)SNP_05464 | 663  | T | C | 8  | 6  | --     | --        |
| CakTC28081 | Ca(ICC2/PI489777)SNP_05465 | 221  | T | G | 5  | 4  | --     | --        |
|            | Ca(ICC2/PI489777)SNP_05466 | 338  | C | A | 7  | 7  | --     | --        |
|            | Ca(ICC2/PI489777)SNP_05467 | 368  | C | T | 6  | 8  | --     | --        |
| CakTC10377 | Ca(ICC2/PI489777)SNP_05468 | 1033 | T | C | 6  | 4  | --     | --        |
| CakTC10741 | Ca(ICC2/PI489777)SNP_05469 | 1702 | A | C | 3  | 6  | --     | --        |
| CakTC26802 | Ca(ICC2/PI489777)SNP_05470 | 183  | G | C | 14 | 7  | --     | --        |
|            | Ca(ICC2/PI489777)SNP_05471 | 441  | A | G | 17 | 7  | --     | --        |

|            |                            |      |   |   |    |    |           |          |
|------------|----------------------------|------|---|---|----|----|-----------|----------|
| CakTC34809 | Ca(ICC2/PI489777)SNP_05472 | 227  | G | T | 4  | 8  | --        | --       |
|            | Ca(ICC2/PI489777)SNP_05473 | 1489 | T | C | 5  | 3  | --        | --       |
|            | Ca(ICC2/PI489777)SNP_05474 | 1640 | C | A | 6  | 5  | --        | --       |
|            | Ca(ICC2/PI489777)SNP_05475 | 1887 | G | A | 5  | 4  | --        | --       |
|            | Ca(ICC2/PI489777)SNP_05476 | 2144 | A | G | 5  | 3  | --        | --       |
|            | Ca(ICC2/PI489777)SNP_05477 | 2148 | C | T | 6  | 3  | --        | --       |
|            | Ca(ICC2/PI489777)SNP_05478 | 2292 | A | G | 8  | 3  | --        | --       |
|            | Ca(ICC2/PI489777)SNP_05479 | 2931 | T | G | 8  | 5  | --        | --       |
|            | Ca(ICC2/PI489777)SNP_05480 | 3148 | A | G | 7  | 7  | --        | --       |
|            | Ca(ICC2/PI489777)SNP_05481 | 3225 | T | C | 7  | 7  | --        | --       |
| CakTC32399 | Ca(ICC2/PI489777)SNP_05482 | 435  | G | A | 5  | 10 | --        | --       |
|            | Ca(ICC2/PI489777)SNP_05483 | 514  | G | A | 7  | 10 | --        | --       |
|            | Ca(ICC2/PI489777)SNP_05484 | 551  | A | G | 6  | 8  | --        | --       |
|            | Ca(ICC2/PI489777)SNP_05485 | 627  | G | T | 7  | 8  | --        | --       |
|            | Ca(ICC2/PI489777)SNP_05486 | 899  | G | A | 5  | 5  | --        | --       |
|            | Ca(ICC2/PI489777)SNP_05487 | 1735 | C | T | 6  | 4  | --        | --       |
|            | Ca(ICC2/PI489777)SNP_05488 | 2968 | T | C | 6  | 3  | --        | --       |
|            | Ca(ICC2/PI489777)SNP_05489 | 3247 | C | T | 3  | 3  | --        | --       |
| CakTC42529 | Ca(ICC2/PI489777)SNP_05490 | 283  | T | A | 3  | 3  | --        | TPR      |
|            | Ca(ICC2/PI489777)SNP_05491 | 653  | C | T | 5  | 3  | --        | TPR      |
|            | Ca(ICC2/PI489777)SNP_05492 | 681  | C | T | 4  | 3  | --        | TPR      |
|            | Ca(ICC2/PI489777)SNP_05493 | 1105 | A | G | 14 | 3  | --        | TPR      |
| CakTC39754 | Ca(ICC2/PI489777)SNP_05494 | 723  | T | A | 7  | 6  | --        | C2C2-Dof |
|            | Ca(ICC2/PI489777)SNP_05495 | 861  | C | T | 7  | 4  | --        | C2C2-Dof |
| CakTC38699 | Ca(ICC2/PI489777)SNP_05496 | 120  | G | C | 4  | 9  | --        | --       |
|            | Ca(ICC2/PI489777)SNP_05497 | 177  | T | C | 4  | 9  | --        | --       |
|            | Ca(ICC2/PI489777)SNP_05498 | 793  | T | C | 10 | 3  | --        | --       |
| CakTC39217 | Ca(ICC2/PI489777)SNP_05499 | 308  | C | T | 4  | 13 | --        | --       |
|            | Ca(ICC2/PI489777)SNP_05500 | 791  | T | C | 3  | 10 | --        | --       |
|            | Ca(ICC2/PI489777)SNP_05501 | 842  | T | C | 4  | 13 | --        | --       |
|            | Ca(ICC2/PI489777)SNP_05502 | 893  | T | G | 4  | 15 | --        | --       |
|            | Ca(ICC2/PI489777)SNP_05503 | 1142 | A | T | 7  | 9  | --        | --       |
|            | Ca(ICC2/PI489777)SNP_05504 | 1518 | T | G | 3  | 3  | --        | --       |
| CakTC31153 | Ca(ICC2/PI489777)SNP_05505 | 416  | C | G | 4  | 3  | --        | --       |
|            | Ca(ICC2/PI489777)SNP_05506 | 445  | G | T | 4  | 3  | --        | --       |
|            | Ca(ICC2/PI489777)SNP_05507 | 453  | A | G | 4  | 3  | --        | --       |
| CakTC11410 | Ca(ICC2/PI489777)SNP_05508 | 1073 | C | T | 3  | 3  | --        | --       |
| CakTC10861 | Ca(ICC2/PI489777)SNP_05509 | 569  | A | G | 6  | 3  | --        | --       |
|            | Ca(ICC2/PI489777)SNP_05510 | 704  | A | G | 4  | 3  | --        | --       |
|            | Ca(ICC2/PI489777)SNP_05511 | 836  | A | T | 6  | 3  | --        | --       |
|            | Ca(ICC2/PI489777)SNP_05512 | 950  | T | C | 7  | 3  | --        | --       |
|            | Ca(ICC2/PI489777)SNP_05513 | 1766 | A | G | 7  | 6  | --        | --       |
| CakTC42609 | Ca(ICC2/PI489777)SNP_05514 | 138  | A | G | 4  | 8  | --        | --       |
|            | Ca(ICC2/PI489777)SNP_05515 | 168  | T | C | 4  | 10 | --        | --       |
|            | Ca(ICC2/PI489777)SNP_05516 | 323  | T | C | 7  | 8  | --        | --       |
|            | Ca(ICC2/PI489777)SNP_05517 | 1274 | C | T | 4  | 3  | --        | --       |
| CakTC40471 | Ca(ICC2/PI489777)SNP_05518 | 145  | A | G | 45 | 47 | --        | --       |
| CakTC36590 | Ca(ICC2/PI489777)SNP_05519 | 2011 | T | C | 19 | 13 | Young_pod | --       |
| CakTC29838 | Ca(ICC2/PI489777)SNP_05520 | 776  | C | G | 3  | 4  | --        | --       |
|            | Ca(ICC2/PI489777)SNP_05521 | 781  | C | G | 3  | 5  | --        | --       |
|            | Ca(ICC2/PI489777)SNP_05522 | 1011 | C | G | 4  | 5  | --        | --       |
|            | Ca(ICC2/PI489777)SNP_05523 | 1149 | A | C | 4  | 6  | --        | --       |
| CakTC29039 | Ca(ICC2/PI489777)SNP_05524 | 656  | G | A | 20 | 10 | --        | --       |
|            | Ca(ICC2/PI489777)SNP_05525 | 1301 | T | C | 17 | 14 | --        | --       |
|            | Ca(ICC2/PI489777)SNP_05526 | 1825 | T | C | 18 | 11 | --        | --       |
| CakTC32025 | Ca(ICC2/PI489777)SNP_05527 | 354  | T | C | 3  | 5  | --        | GeBP     |
|            | Ca(ICC2/PI489777)SNP_05528 | 568  | G | C | 6  | 11 | --        | GeBP     |
|            | Ca(ICC2/PI489777)SNP_05529 | 757  | C | T | 21 | 20 | --        | GeBP     |
|            | Ca(ICC2/PI489777)SNP_05530 | 1318 | A | G | 23 | 18 | --        | GeBP     |
|            | Ca(ICC2/PI489777)SNP_05531 | 1366 | C | G | 31 | 25 | --        | GeBP     |
|            | Ca(ICC2/PI489777)SNP_05532 | 1392 | G | T | 30 | 19 | --        | GeBP     |
| CakTC23134 | Ca(ICC2/PI489777)SNP_05533 | 83   | G | T | 5  | 14 | --        | --       |
|            | Ca(ICC2/PI489777)SNP_05534 | 1431 | T | A | 37 | 8  | --        | --       |
| CakTC43371 | Ca(ICC2/PI489777)SNP_05535 | 49   | C | A | 11 | 16 | --        | --       |
|            | Ca(ICC2/PI489777)SNP_05536 | 50   | T | C | 10 | 16 | --        | --       |
|            | Ca(ICC2/PI489777)SNP_05537 | 59   | A | G | 11 | 16 | --        | --       |
| CakTC29948 | Ca(ICC2/PI489777)SNP_05538 | 3158 | T | C | 6  | 3  | --        | --       |
|            | Ca(ICC2/PI489777)SNP_05539 | 3407 | A | C | 6  | 4  | --        | --       |
|            | Ca(ICC2/PI489777)SNP_05540 | 4266 | G | A | 8  | 8  | --        | --       |
|            | Ca(ICC2/PI489777)SNP_05541 | 4496 | A | G | 9  | 11 | --        | --       |
|            | Ca(ICC2/PI489777)SNP_05542 | 5206 | C | T | 10 | 3  | --        | --       |
|            | Ca(ICC2/PI489777)SNP_05543 | 5513 | C | T | 3  | 3  | --        | --       |
| CakTC41035 | Ca(ICC2/PI489777)SNP_05544 | 443  | G | T | 87 | 48 | --        | --       |
| CakTC41024 | Ca(ICC2/PI489777)SNP_05545 | 227  | A | G | 20 | 11 | --        | --       |

|            |                            |      |   |   |     |    |           |         |
|------------|----------------------------|------|---|---|-----|----|-----------|---------|
|            | Ca(ICC2/PI489777)SNP_05546 | 500  | G | A | 18  | 4  | --        | --      |
| CakTC32132 | Ca(ICC2/PI489777)SNP_05547 | 1480 | A | G | 7   | 11 | Root      | --      |
| CakTC30644 | Ca(ICC2/PI489777)SNP_05548 | 198  | C | T | 27  | 12 | --        | --      |
|            | Ca(ICC2/PI489777)SNP_05549 | 576  | C | T | 11  | 8  | --        | --      |
|            | Ca(ICC2/PI489777)SNP_05550 | 588  | C | T | 9   | 7  | --        | --      |
|            | Ca(ICC2/PI489777)SNP_05551 | 633  | T | G | 12  | 3  | --        | --      |
|            | Ca(ICC2/PI489777)SNP_05552 | 645  | C | T | 11  | 3  | --        | --      |
|            | Ca(ICC2/PI489777)SNP_05553 | 669  | A | G | 14  | 4  | --        | --      |
| CakTC40319 | Ca(ICC2/PI489777)SNP_05554 | 571  | T | C | 17  | 5  | --        | --      |
|            | Ca(ICC2/PI489777)SNP_05555 | 810  | A | G | 22  | 10 | --        | --      |
|            | Ca(ICC2/PI489777)SNP_05556 | 1898 | C | T | 33  | 14 | --        | --      |
| CakTC26652 | Ca(ICC2/PI489777)SNP_05557 | 127  | T | C | 5   | 4  | --        | --      |
|            | Ca(ICC2/PI489777)SNP_05558 | 568  | C | A | 6   | 3  | --        | --      |
|            | Ca(ICC2/PI489777)SNP_05559 | 1024 | A | G | 9   | 4  | --        | --      |
|            | Ca(ICC2/PI489777)SNP_05560 | 1129 | A | T | 8   | 7  | --        | --      |
|            | Ca(ICC2/PI489777)SNP_05561 | 1330 | T | C | 15  | 9  | --        | --      |
|            | Ca(ICC2/PI489777)SNP_05562 | 1585 | G | A | 14  | 4  | --        | --      |
|            | Ca(ICC2/PI489777)SNP_05563 | 1798 | C | T | 21  | 10 | --        | --      |
|            | Ca(ICC2/PI489777)SNP_05564 | 2702 | C | T | 10  | 5  | --        | --      |
| CakTC26570 | Ca(ICC2/PI489777)SNP_05565 | 530  | G | C | 3   | 6  | --        | --      |
|            | Ca(ICC2/PI489777)SNP_05566 | 827  | A | T | 5   | 5  | --        | --      |
|            | Ca(ICC2/PI489777)SNP_05567 | 1043 | T | C | 20  | 5  | --        | --      |
|            | Ca(ICC2/PI489777)SNP_05568 | 1102 | T | C | 23  | 6  | --        | --      |
|            | Ca(ICC2/PI489777)SNP_05569 | 1474 | A | T | 4   | 6  | --        | --      |
| CakTC32390 | Ca(ICC2/PI489777)SNP_05570 | 683  | G | C | 112 | 89 | Flower    | bud     |
| CakTC39200 | Ca(ICC2/PI489777)SNP_05571 | 119  | G | C | 7   | 11 | --        | --      |
| CakTC09332 | Ca(ICC2/PI489777)SNP_05572 | 929  | A | G | 6   | 3  | --        | --      |
|            | Ca(ICC2/PI489777)SNP_05573 | 2120 | C | A | 3   | 6  | --        | --      |
| CakTC32522 | Ca(ICC2/PI489777)SNP_05574 | 199  | T | C | 7   | 3  | --        | --      |
|            | Ca(ICC2/PI489777)SNP_05575 | 1684 | C | T | 6   | 3  | --        | --      |
| CakTC43265 | Ca(ICC2/PI489777)SNP_05576 | 1251 | C | T | 16  | 22 | --        | --      |
|            | Ca(ICC2/PI489777)SNP_05577 | 1290 | C | T | 17  | 20 | --        | --      |
|            | Ca(ICC2/PI489777)SNP_05578 | 1410 | G | A | 15  | 15 | --        | --      |
|            | Ca(ICC2/PI489777)SNP_05579 | 1494 | A | T | 11  | 11 | --        | --      |
|            | Ca(ICC2/PI489777)SNP_05580 | 1563 | A | G | 10  | 11 | --        | --      |
|            | Ca(ICC2/PI489777)SNP_05581 | 1649 | T | C | 5   | 3  | --        | --      |
|            | Ca(ICC2/PI489777)SNP_05582 | 1652 | T | C | 3   | 4  | --        | --      |
|            | Ca(ICC2/PI489777)SNP_05583 | 1699 | C | T | 4   | 4  | --        | --      |
| CakTC39127 | Ca(ICC2/PI489777)SNP_05584 | 131  | T | C | 15  | 21 | --        | bZIP    |
|            | Ca(ICC2/PI489777)SNP_05585 | 262  | C | T | 17  | 26 | --        | bZIP    |
|            | Ca(ICC2/PI489777)SNP_05586 | 274  | G | A | 21  | 20 | --        | bZIP    |
|            | Ca(ICC2/PI489777)SNP_05587 | 1171 | T | G | 24  | 54 | --        | bZIP    |
| CakTC02884 | Ca(ICC2/PI489777)SNP_05588 | 58   | G | A | 12  | 8  | --        | --      |
|            | Ca(ICC2/PI489777)SNP_05589 | 153  | A | C | 13  | 7  | --        | --      |
|            | Ca(ICC2/PI489777)SNP_05590 | 943  | A | G | 3   | 7  | --        | --      |
|            | Ca(ICC2/PI489777)SNP_05591 | 1944 | T | C | 6   | 5  | --        | --      |
|            | Ca(ICC2/PI489777)SNP_05592 | 2081 | C | T | 7   | 4  | --        | --      |
| CakTC24765 | Ca(ICC2/PI489777)SNP_05593 | 103  | A | C | 49  | 26 | --        | --      |
|            | Ca(ICC2/PI489777)SNP_05594 | 224  | T | A | 55  | 38 | --        | --      |
|            | Ca(ICC2/PI489777)SNP_05595 | 272  | T | A | 64  | 29 | --        | --      |
|            | Ca(ICC2/PI489777)SNP_05596 | 302  | C | T | 73  | 41 | --        | --      |
|            | Ca(ICC2/PI489777)SNP_05597 | 1211 | T | G | 80  | 33 | --        | --      |
|            | Ca(ICC2/PI489777)SNP_05598 | 1730 | C | T | 25  | 20 | --        | --      |
|            | Ca(ICC2/PI489777)SNP_05599 | 1753 | C | G | 34  | 10 | --        | --      |
|            | Ca(ICC2/PI489777)SNP_05600 | 1897 | C | G | 24  | 6  | --        | --      |
|            | Ca(ICC2/PI489777)SNP_05601 | 1965 | T | C | 22  | 4  | --        | --      |
| CakTC31657 | Ca(ICC2/PI489777)SNP_05602 | 978  | G | C | 7   | 3  | --        | --      |
|            | Ca(ICC2/PI489777)SNP_05603 | 1191 | G | C | 6   | 3  | --        | --      |
|            | Ca(ICC2/PI489777)SNP_05604 | 2197 | C | G | 7   | 6  | --        | --      |
| CakTC26056 | Ca(ICC2/PI489777)SNP_05605 | 1231 | G | A | 3   | 3  | --        | --      |
|            | Ca(ICC2/PI489777)SNP_05606 | 1264 | A | G | 3   | 3  | --        | --      |
| CakTC26036 | Ca(ICC2/PI489777)SNP_05607 | 487  | A | G | 4   | 5  | --        | G2-like |
|            | Ca(ICC2/PI489777)SNP_05608 | 535  | G | A | 4   | 4  | --        | G2-like |
|            | Ca(ICC2/PI489777)SNP_05609 | 583  | G | C | 4   | 5  | --        | G2-like |
|            | Ca(ICC2/PI489777)SNP_05610 | 1116 | A | G | 11  | 7  | --        | G2-like |
| CakTC32340 | Ca(ICC2/PI489777)SNP_05611 | 846  | G | C | 6   | 8  | Young_pod | --      |
| CakTC13059 | Ca(ICC2/PI489777)SNP_05612 | 289  | G | A | 4   | 4  | --        | --      |
|            | Ca(ICC2/PI489777)SNP_05613 | 445  | C | T | 3   | 5  | --        | --      |
|            | Ca(ICC2/PI489777)SNP_05614 | 544  | A | G | 3   | 5  | --        | --      |
|            | Ca(ICC2/PI489777)SNP_05615 | 905  | G | A | 3   | 6  | --        | --      |
|            | Ca(ICC2/PI489777)SNP_05616 | 986  | A | G | 3   | 9  | --        | --      |
|            | Ca(ICC2/PI489777)SNP_05617 | 1217 | A | T | 5   | 7  | --        | --      |
|            | Ca(ICC2/PI489777)SNP_05618 | 1241 | G | T | 5   | 4  | --        | --      |
|            | Ca(ICC2/PI489777)SNP_05619 | 1374 | C | G | 5   | 4  | --        | --      |

|            |                            |      |   |   |    |    |       |    |
|------------|----------------------------|------|---|---|----|----|-------|----|
|            | Ca(ICC2/PI489777)SNP_05620 | 1404 | G | C | 6  | 4  | --    | -- |
| CakTC23844 | Ca(ICC2/PI489777)SNP_05621 | 285  | C | T | 34 | 11 | Shoot | -- |
|            | Ca(ICC2/PI489777)SNP_05622 | 317  | T | G | 35 | 12 | Shoot | -- |
|            | Ca(ICC2/PI489777)SNP_05623 | 528  | T | C | 20 | 8  | Shoot | -- |
| CakTC38317 | Ca(ICC2/PI489777)SNP_05624 | 102  | G | A | 10 | 11 | --    | -- |
|            | Ca(ICC2/PI489777)SNP_05625 | 440  | T | C | 15 | 21 | --    | -- |
|            | Ca(ICC2/PI489777)SNP_05626 | 1075 | C | A | 10 | 8  | --    | -- |
| CakTC25477 | Ca(ICC2/PI489777)SNP_05627 | 331  | T | C | 7  | 11 | --    | -- |
|            | Ca(ICC2/PI489777)SNP_05628 | 479  | A | G | 7  | 9  | --    | -- |
| CakTC38561 | Ca(ICC2/PI489777)SNP_05629 | 324  | A | G | 11 | 4  | --    | -- |
| CakTC42136 | Ca(ICC2/PI489777)SNP_05630 | 671  | G | A | 10 | 6  | Shoot | -- |
|            | Ca(ICC2/PI489777)SNP_05631 | 824  | T | A | 12 | 13 | Shoot | -- |
|            | Ca(ICC2/PI489777)SNP_05632 | 881  | A | G | 9  | 11 | Shoot | -- |
| CakTC29460 | Ca(ICC2/PI489777)SNP_05633 | 2449 | A | G | 5  | 4  | --    | -- |
|            | Ca(ICC2/PI489777)SNP_05634 | 2474 | A | C | 5  | 4  | --    | -- |
| CakTC35396 | Ca(ICC2/PI489777)SNP_05635 | 829  | C | T | 15 | 11 | --    | -- |
|            | Ca(ICC2/PI489777)SNP_05636 | 1316 | A | G | 13 | 17 | --    | -- |
|            | Ca(ICC2/PI489777)SNP_05637 | 2116 | T | C | 25 | 21 | --    | -- |
|            | Ca(ICC2/PI489777)SNP_05638 | 2167 | G | C | 20 | 12 | --    | -- |
|            | Ca(ICC2/PI489777)SNP_05639 | 3079 | A | G | 9  | 7  | --    | -- |
| CakTC35596 | Ca(ICC2/PI489777)SNP_05640 | 735  | A | T | 5  | 3  | --    | -- |
|            | Ca(ICC2/PI489777)SNP_05641 | 1196 | A | C | 10 | 11 | --    | -- |
|            | Ca(ICC2/PI489777)SNP_05642 | 1430 | T | G | 9  | 9  | --    | -- |
|            | Ca(ICC2/PI489777)SNP_05643 | 1439 | C | T | 8  | 9  | --    | -- |
|            | Ca(ICC2/PI489777)SNP_05644 | 1994 | G | A | 14 | 4  | --    | -- |
|            | Ca(ICC2/PI489777)SNP_05645 | 3191 | G | A | 12 | 4  | --    | -- |
| CakTC41797 | Ca(ICC2/PI489777)SNP_05646 | 83   | C | G | 4  | 3  | --    | -- |
|            | Ca(ICC2/PI489777)SNP_05647 | 1167 | A | C | 42 | 30 | --    | -- |
|            | Ca(ICC2/PI489777)SNP_05648 | 1168 | G | A | 42 | 30 | --    | -- |
|            | Ca(ICC2/PI489777)SNP_05649 | 1866 | C | G | 21 | 11 | --    | -- |
| CakTC41811 | Ca(ICC2/PI489777)SNP_05650 | 130  | C | T | 3  | 5  | --    | -- |
|            | Ca(ICC2/PI489777)SNP_05651 | 148  | T | C | 3  | 5  | --    | -- |
|            | Ca(ICC2/PI489777)SNP_05652 | 191  | C | T | 3  | 4  | --    | -- |
|            | Ca(ICC2/PI489777)SNP_05653 | 223  | A | C | 3  | 4  | --    | -- |
|            | Ca(ICC2/PI489777)SNP_05654 | 253  | T | C | 3  | 5  | --    | -- |
|            | Ca(ICC2/PI489777)SNP_05655 | 268  | T | C | 3  | 6  | --    | -- |
|            | Ca(ICC2/PI489777)SNP_05656 | 328  | C | T | 3  | 9  | --    | -- |
|            | Ca(ICC2/PI489777)SNP_05657 | 352  | C | A | 3  | 8  | --    | -- |
|            | Ca(ICC2/PI489777)SNP_05658 | 652  | G | A | 7  | 9  | --    | -- |
|            | Ca(ICC2/PI489777)SNP_05659 | 688  | G | A | 10 | 5  | --    | -- |
|            | Ca(ICC2/PI489777)SNP_05660 | 919  | T | C | 13 | 9  | --    | -- |
|            | Ca(ICC2/PI489777)SNP_05661 | 934  | T | C | 16 | 10 | --    | -- |
|            | Ca(ICC2/PI489777)SNP_05662 | 1504 | G | A | 19 | 12 | --    | -- |
|            | Ca(ICC2/PI489777)SNP_05663 | 1561 | G | T | 17 | 10 | --    | -- |
|            | Ca(ICC2/PI489777)SNP_05664 | 2005 | T | A | 9  | 9  | --    | -- |
|            | Ca(ICC2/PI489777)SNP_05665 | 2263 | A | G | 3  | 9  | --    | -- |
| CakTC10073 | Ca(ICC2/PI489777)SNP_05666 | 268  | T | C | 5  | 3  | --    | -- |
| CakTC38205 | Ca(ICC2/PI489777)SNP_05667 | 502  | A | G | 4  | 4  | --    | -- |
|            | Ca(ICC2/PI489777)SNP_05668 | 532  | T | C | 3  | 3  | --    | -- |
|            | Ca(ICC2/PI489777)SNP_05669 | 628  | A | G | 3  | 8  | --    | -- |
|            | Ca(ICC2/PI489777)SNP_05670 | 841  | C | T | 3  | 6  | --    | -- |
|            | Ca(ICC2/PI489777)SNP_05671 | 1099 | T | G | 4  | 6  | --    | -- |
|            | Ca(ICC2/PI489777)SNP_05672 | 1105 | T | C | 4  | 4  | --    | -- |
|            | Ca(ICC2/PI489777)SNP_05673 | 1262 | A | G | 3  | 4  | --    | -- |
|            | Ca(ICC2/PI489777)SNP_05674 | 1406 | C | G | 3  | 4  | --    | -- |
| CakTC26602 | Ca(ICC2/PI489777)SNP_05675 | 780  | C | T | 4  | 14 | --    | -- |
|            | Ca(ICC2/PI489777)SNP_05676 | 885  | T | A | 17 | 18 | --    | -- |
|            | Ca(ICC2/PI489777)SNP_05677 | 993  | T | C | 29 | 22 | --    | -- |
|            | Ca(ICC2/PI489777)SNP_05678 | 1212 | G | A | 28 | 21 | --    | -- |
| CakTC08287 | Ca(ICC2/PI489777)SNP_05679 | 309  | T | G | 11 | 4  | --    | -- |
|            | Ca(ICC2/PI489777)SNP_05680 | 541  | A | G | 11 | 9  | --    | -- |
|            | Ca(ICC2/PI489777)SNP_05681 | 868  | T | C | 8  | 8  | --    | -- |
|            | Ca(ICC2/PI489777)SNP_05682 | 943  | A | T | 8  | 8  | --    | -- |
|            | Ca(ICC2/PI489777)SNP_05683 | 960  | C | T | 8  | 8  | --    | -- |
|            | Ca(ICC2/PI489777)SNP_05684 | 1953 | T | C | 5  | 4  | --    | -- |
|            | Ca(ICC2/PI489777)SNP_05685 | 2008 | C | T | 4  | 7  | --    | -- |
|            | Ca(ICC2/PI489777)SNP_05686 | 2021 | A | G | 4  | 7  | --    | -- |
|            | Ca(ICC2/PI489777)SNP_05687 | 2151 | C | T | 6  | 5  | --    | -- |
|            | Ca(ICC2/PI489777)SNP_05688 | 2193 | G | C | 5  | 5  | --    | -- |
|            | Ca(ICC2/PI489777)SNP_05689 | 2207 | G | C | 5  | 3  | --    | -- |
| CakTC32003 | Ca(ICC2/PI489777)SNP_05690 | 2127 | C | T | 5  | 3  | --    | HB |
|            | Ca(ICC2/PI489777)SNP_05691 | 2145 | C | T | 6  | 3  | --    | HB |
|            | Ca(ICC2/PI489777)SNP_05692 | 2256 | C | T | 7  | 3  | --    | HB |
| CakTC36026 | Ca(ICC2/PI489777)SNP_05693 | 80   | T | C | 52 | 40 | --    | -- |

|            |                            |      |   |   |     |     |        |          |
|------------|----------------------------|------|---|---|-----|-----|--------|----------|
| CakTC00458 | Ca(ICC2/P1489777)SNP_05694 | 203  | G | A | 16  | 13  | --     | --       |
|            | Ca(ICC2/P1489777)SNP_05695 | 417  | T | G | 50  | 27  | --     | --       |
|            | Ca(ICC2/P1489777)SNP_05696 | 498  | A | G | 54  | 25  | --     | --       |
|            | Ca(ICC2/P1489777)SNP_05697 | 744  | T | A | 12  | 4   | --     | --       |
| CakTC35916 | Ca(ICC2/P1489777)SNP_05698 | 667  | T | C | 4   | 4   | Shoot  | --       |
|            | Ca(ICC2/P1489777)SNP_05699 | 915  | T | C | 6   | 9   | Shoot  | --       |
|            | Ca(ICC2/P1489777)SNP_05700 | 1039 | T | A | 5   | 10  | Shoot  | --       |
|            | Ca(ICC2/P1489777)SNP_05701 | 1048 | A | G | 4   | 10  | Shoot  | --       |
| CakTC10803 | Ca(ICC2/P1489777)SNP_05702 | 246  | G | A | 29  | 18  | --     | --       |
|            | Ca(ICC2/P1489777)SNP_05703 | 460  | T | G | 60  | 30  | --     | --       |
|            | Ca(ICC2/P1489777)SNP_05704 | 541  | A | G | 60  | 29  | --     | --       |
|            | Ca(ICC2/P1489777)SNP_05705 | 787  | T | A | 44  | 29  | --     | --       |
|            | Ca(ICC2/P1489777)SNP_05706 | 886  | C | T | 55  | 34  | --     | --       |
|            | Ca(ICC2/P1489777)SNP_05707 | 925  | T | G | 62  | 38  | --     | --       |
|            | Ca(ICC2/P1489777)SNP_05708 | 928  | G | A | 63  | 38  | --     | --       |
|            | Ca(ICC2/P1489777)SNP_05709 | 1099 | A | G | 51  | 31  | --     | --       |
| CakTC29043 | Ca(ICC2/P1489777)SNP_05710 | 88   | G | C | 6   | 3   | --     | --       |
|            | Ca(ICC2/P1489777)SNP_05711 | 753  | T | G | 11  | 23  | --     | --       |
|            | Ca(ICC2/P1489777)SNP_05712 | 774  | T | C | 9   | 21  | --     | --       |
|            | Ca(ICC2/P1489777)SNP_05713 | 927  | C | T | 16  | 17  | --     | --       |
|            | Ca(ICC2/P1489777)SNP_05714 | 1208 | G | A | 12  | 6   | --     | --       |
| CakTC27645 | Ca(ICC2/P1489777)SNP_05715 | 685  | T | G | 3   | 3   | --     | --       |
| CakTC37832 | Ca(ICC2/P1489777)SNP_05716 | 61   | G | A | 12  | 3   | Root   | --       |
|            | Ca(ICC2/P1489777)SNP_05717 | 87   | T | G | 14  | 4   | Root   | --       |
|            | Ca(ICC2/P1489777)SNP_05718 | 1276 | T | C | 4   | 3   | Root   | --       |
| CakTC25768 | Ca(ICC2/P1489777)SNP_05719 | 1089 | T | C | 3   | 3   | --     | --       |
| CakTC31123 | Ca(ICC2/P1489777)SNP_05720 | 2172 | C | T | 15  | 10  | --     | --       |
|            | Ca(ICC2/P1489777)SNP_05721 | 2374 | A | T | 5   | 5   | --     | --       |
| CakTC28302 | Ca(ICC2/P1489777)SNP_05722 | 81   | T | A | 6   | 16  | --     | --       |
|            | Ca(ICC2/P1489777)SNP_05723 | 876  | T | C | 14  | 16  | --     | --       |
| CakTC00995 | Ca(ICC2/P1489777)SNP_05724 | 212  | A | G | 5   | 5   | --     | --       |
|            | Ca(ICC2/P1489777)SNP_05725 | 656  | A | G | 13  | 12  | --     | --       |
|            | Ca(ICC2/P1489777)SNP_05726 | 815  | G | A | 12  | 14  | --     | --       |
|            | Ca(ICC2/P1489777)SNP_05727 | 857  | G | T | 8   | 10  | --     | --       |
| CakTC38904 | Ca(ICC2/P1489777)SNP_05728 | 705  | A | G | 3   | 3   | --     | --       |
|            | Ca(ICC2/P1489777)SNP_05729 | 951  | T | A | 6   | 3   | --     | --       |
|            | Ca(ICC2/P1489777)SNP_05730 | 1140 | C | T | 7   | 8   | --     | --       |
|            | Ca(ICC2/P1489777)SNP_05731 | 1292 | A | G | 4   | 7   | --     | --       |
| CakTC25275 | Ca(ICC2/P1489777)SNP_05732 | 220  | A | T | 72  | 10  | --     | --       |
|            | Ca(ICC2/P1489777)SNP_05733 | 444  | C | T | 87  | 11  | --     | --       |
|            | Ca(ICC2/P1489777)SNP_05734 | 639  | T | A | 80  | 5   | --     | --       |
|            | Ca(ICC2/P1489777)SNP_05735 | 1274 | T | C | 63  | 16  | --     | --       |
|            | Ca(ICC2/P1489777)SNP_05736 | 1306 | G | A | 78  | 15  | --     | --       |
|            | Ca(ICC2/P1489777)SNP_05737 | 1386 | G | T | 101 | 15  | --     | --       |
| CakTC24719 | Ca(ICC2/P1489777)SNP_05738 | 453  | G | A | 27  | 23  | --     | bZIP     |
|            | Ca(ICC2/P1489777)SNP_05739 | 571  | G | A | 42  | 37  | --     | bZIP     |
|            | Ca(ICC2/P1489777)SNP_05740 | 739  | G | T | 63  | 64  | --     | bZIP     |
|            | Ca(ICC2/P1489777)SNP_05741 | 1204 | G | C | 6   | 19  | --     | bZIP     |
| CakTC28589 | Ca(ICC2/P1489777)SNP_05742 | 517  | T | C | 28  | 19  | --     | --       |
| CakTC11636 | Ca(ICC2/P1489777)SNP_05743 | 17   | A | G | 4   | 3   | --     | --       |
|            | Ca(ICC2/P1489777)SNP_05744 | 33   | T | G | 4   | 3   | --     | --       |
| CakTC40609 | Ca(ICC2/P1489777)SNP_05745 | 42   | G | C | 53  | 10  | Flower | bud      |
|            | Ca(ICC2/P1489777)SNP_05746 | 171  | G | A | 65  | 33  | Flower | bud      |
|            | Ca(ICC2/P1489777)SNP_05747 | 240  | A | G | 81  | 53  | Flower | bud      |
|            | Ca(ICC2/P1489777)SNP_05748 | 345  | T | A | 141 | 108 | Flower | bud      |
|            | Ca(ICC2/P1489777)SNP_05749 | 567  | A | G | 125 | 106 | Flower | bud      |
|            | Ca(ICC2/P1489777)SNP_05750 | 600  | G | C | 118 | 85  | Flower | bud      |
| CakTC27796 | Ca(ICC2/P1489777)SNP_05751 | 295  | A | G | 12  | 9   | --     | --       |
|            | Ca(ICC2/P1489777)SNP_05752 | 373  | T | C | 15  | 14  | --     | --       |
|            | Ca(ICC2/P1489777)SNP_05753 | 656  | A | C | 9   | 8   | --     | --       |
|            | Ca(ICC2/P1489777)SNP_05754 | 1257 | C | T | 35  | 4   | --     | --       |
|            | Ca(ICC2/P1489777)SNP_05755 | 1780 | A | G | 10  | 7   | --     | --       |
| CakTC33096 | Ca(ICC2/P1489777)SNP_05756 | 421  | G | A | 63  | 28  | --     | --       |
| CakTC31105 | Ca(ICC2/P1489777)SNP_05757 | 804  | A | G | 6   | 10  | --     | --       |
|            | Ca(ICC2/P1489777)SNP_05758 | 919  | T | C | 7   | 10  | --     | --       |
|            | Ca(ICC2/P1489777)SNP_05759 | 1088 | A | G | 9   | 6   | --     | --       |
| CakTC22650 | Ca(ICC2/P1489777)SNP_05760 | 482  | T | C | 3   | 4   | --     | --       |
|            | Ca(ICC2/P1489777)SNP_05761 | 505  | A | T | 4   | 3   | --     | --       |
|            | Ca(ICC2/P1489777)SNP_05762 | 569  | T | A | 4   | 3   | --     | --       |
|            | Ca(ICC2/P1489777)SNP_05763 | 579  | C | G | 4   | 3   | --     | --       |
| CakTC05382 | Ca(ICC2/P1489777)SNP_05764 | 229  | G | C | 9   | 6   | --     | --       |
| CakTC42363 | Ca(ICC2/P1489777)SNP_05765 | 1031 | G | A | 20  | 13  | --     | bZIP     |
| CakTC31038 | Ca(ICC2/P1489777)SNP_05766 | 170  | G | C | 4   | 4   | --     | C2C2-Dof |
|            | Ca(ICC2/P1489777)SNP_05767 | 226  | T | C | 3   | 4   | --     | C2C2-Dof |

|            |                             |      |   |   |     |    |           |      |
|------------|-----------------------------|------|---|---|-----|----|-----------|------|
| CakTC41776 | Ca(ICCV2/PI489777)SNP_05768 | 482  | A | G | 24  | 43 | --        | --   |
| CakTC39476 | Ca(ICCV2/PI489777)SNP_05769 | 195  | T | C | 3   | 4  | --        | --   |
|            | Ca(ICCV2/PI489777)SNP_05770 | 262  | C | A | 5   | 3  | --        | --   |
| CakTC28109 | Ca(ICCV2/PI489777)SNP_05771 | 124  | G | T | 10  | 3  | --        | --   |
|            | Ca(ICCV2/PI489777)SNP_05772 | 1749 | C | G | 6   | 3  | --        | --   |
|            | Ca(ICCV2/PI489777)SNP_05773 | 1754 | T | A | 6   | 3  | --        | --   |
| CakTC08500 | Ca(ICCV2/PI489777)SNP_05774 | 393  | T | C | 3   | 6  | --        | --   |
|            | Ca(ICCV2/PI489777)SNP_05775 | 579  | A | T | 11  | 5  | --        | --   |
|            | Ca(ICCV2/PI489777)SNP_05776 | 723  | A | T | 15  | 9  | --        | --   |
|            | Ca(ICCV2/PI489777)SNP_05777 | 1779 | T | G | 8   | 3  | --        | --   |
| CakTC37413 | Ca(ICCV2/PI489777)SNP_05778 | 219  | A | G | 11  | 3  | --        | --   |
|            | Ca(ICCV2/PI489777)SNP_05779 | 261  | T | C | 11  | 3  | --        | --   |
|            | Ca(ICCV2/PI489777)SNP_05780 | 270  | A | C | 11  | 3  | --        | --   |
| CakTC26531 | Ca(ICCV2/PI489777)SNP_05781 | 1212 | G | A | 3   | 4  | Young_pod | --   |
| CakTC03882 | Ca(ICCV2/PI489777)SNP_05782 | 495  | T | A | 6   | 3  | --        | --   |
|            | Ca(ICCV2/PI489777)SNP_05783 | 608  | T | C | 3   | 3  | --        | --   |
|            | Ca(ICCV2/PI489777)SNP_05784 | 1142 | A | G | 3   | 3  | --        | --   |
|            | Ca(ICCV2/PI489777)SNP_05785 | 1210 | T | C | 3   | 3  | --        | --   |
| CakTC38429 | Ca(ICCV2/PI489777)SNP_05786 | 1397 | C | T | 7   | 6  | --        | --   |
|            | Ca(ICCV2/PI489777)SNP_05787 | 1506 | T | G | 16  | 7  | --        | --   |
| CakTC24868 | Ca(ICCV2/PI489777)SNP_05788 | 522  | A | G | 21  | 4  | --        | --   |
| CakTC22877 | Ca(ICCV2/PI489777)SNP_05789 | 820  | T | A | 38  | 3  | --        | --   |
| CakTC31975 | Ca(ICCV2/PI489777)SNP_05790 | 1266 | T | C | 4   | 6  | Flower    | bud  |
| CakTC42078 | Ca(ICCV2/PI489777)SNP_05791 | 497  | A | G | 16  | 12 | --        | --   |
| CakTC37219 | Ca(ICCV2/PI489777)SNP_05792 | 1071 | G | T | 5   | 8  | --        | --   |
| CakTC22603 | Ca(ICCV2/PI489777)SNP_05793 | 1137 | C | T | 16  | 4  | --        | GNAT |
|            | Ca(ICCV2/PI489777)SNP_05794 | 3021 | C | T | 8   | 14 | --        | GNAT |
|            | Ca(ICCV2/PI489777)SNP_05795 | 3169 | C | T | 24  | 22 | --        | GNAT |
|            | Ca(ICCV2/PI489777)SNP_05796 | 3269 | T | C | 28  | 21 | --        | GNAT |
| CakTC40775 | Ca(ICCV2/PI489777)SNP_05797 | 404  | T | G | 16  | 8  | --        | --   |
|            | Ca(ICCV2/PI489777)SNP_05798 | 661  | C | A | 11  | 8  | --        | --   |
|            | Ca(ICCV2/PI489777)SNP_05799 | 711  | A | G | 4   | 7  | --        | --   |
|            | Ca(ICCV2/PI489777)SNP_05800 | 753  | T | C | 3   | 7  | --        | --   |
| CakTC23590 | Ca(ICCV2/PI489777)SNP_05801 | 191  | A | G | 99  | 26 | --        | --   |
|            | Ca(ICCV2/PI489777)SNP_05802 | 204  | C | T | 103 | 22 | --        | --   |
|            | Ca(ICCV2/PI489777)SNP_05803 | 340  | A | C | 122 | 26 | --        | --   |
| CakTC24011 | Ca(ICCV2/PI489777)SNP_05804 | 530  | C | T | 3   | 6  | --        | --   |
|            | Ca(ICCV2/PI489777)SNP_05805 | 766  | T | G | 20  | 7  | --        | --   |
|            | Ca(ICCV2/PI489777)SNP_05806 | 796  | T | C | 21  | 8  | --        | --   |
|            | Ca(ICCV2/PI489777)SNP_05807 | 1311 | C | T | 24  | 7  | --        | --   |
|            | Ca(ICCV2/PI489777)SNP_05808 | 2120 | C | G | 12  | 6  | --        | --   |
|            | Ca(ICCV2/PI489777)SNP_05809 | 2151 | A | T | 12  | 6  | --        | --   |
| CakTC34772 | Ca(ICCV2/PI489777)SNP_05810 | 1300 | A | G | 10  | 7  | --        | --   |
|            | Ca(ICCV2/PI489777)SNP_05811 | 3073 | T | C | 18  | 11 | --        | --   |
|            | Ca(ICCV2/PI489777)SNP_05812 | 3339 | G | A | 12  | 6  | --        | --   |
| CakTC40768 | Ca(ICCV2/PI489777)SNP_05813 | 897  | C | T | 8   | 8  | --        | --   |
|            | Ca(ICCV2/PI489777)SNP_05814 | 1272 | A | G | 12  | 6  | --        | --   |
|            | Ca(ICCV2/PI489777)SNP_05815 | 1685 | G | C | 15  | 3  | --        | --   |
| CakTC31192 | Ca(ICCV2/PI489777)SNP_05816 | 1052 | C | T | 5   | 3  | --        | --   |
|            | Ca(ICCV2/PI489777)SNP_05817 | 1230 | T | A | 4   | 3  | --        | --   |
| CakTC25003 | Ca(ICCV2/PI489777)SNP_05818 | 593  | G | C | 9   | 3  | --        | --   |
|            | Ca(ICCV2/PI489777)SNP_05819 | 737  | A | T | 9   | 7  | --        | --   |
| CakTC03007 | Ca(ICCV2/PI489777)SNP_05820 | 1165 | G | C | 6   | 8  | --        | --   |
|            | Ca(ICCV2/PI489777)SNP_05821 | 1632 | A | G | 6   | 5  | --        | --   |
| CakTC22703 | Ca(ICCV2/PI489777)SNP_05822 | 886  | C | T | 6   | 7  | --        | --   |
|            | Ca(ICCV2/PI489777)SNP_05823 | 903  | C | G | 6   | 7  | --        | --   |
|            | Ca(ICCV2/PI489777)SNP_05824 | 1004 | G | A | 9   | 10 | --        | --   |
| CakTC43088 | Ca(ICCV2/PI489777)SNP_05825 | 146  | G | C | 4   | 3  | --        | --   |
|            | Ca(ICCV2/PI489777)SNP_05826 | 447  | A | G | 10  | 9  | --        | --   |
|            | Ca(ICCV2/PI489777)SNP_05827 | 496  | T | A | 9   | 9  | --        | --   |
|            | Ca(ICCV2/PI489777)SNP_05828 | 502  | C | T | 9   | 18 | --        | --   |
|            | Ca(ICCV2/PI489777)SNP_05829 | 774  | T | G | 18  | 25 | --        | --   |
|            | Ca(ICCV2/PI489777)SNP_05830 | 838  | A | T | 17  | 22 | --        | --   |
|            | Ca(ICCV2/PI489777)SNP_05831 | 1450 | T | A | 6   | 7  | --        | --   |
| CakTC33680 | Ca(ICCV2/PI489777)SNP_05832 | 1288 | T | C | 29  | 23 | --        | --   |
| CakTC33799 | Ca(ICCV2/PI489777)SNP_05833 | 476  | T | C | 6   | 5  | --        | --   |
|            | Ca(ICCV2/PI489777)SNP_05834 | 2090 | T | C | 13  | 4  | --        | --   |
|            | Ca(ICCV2/PI489777)SNP_05835 | 9998 | A | G | 15  | 4  | --        | --   |
| CakTC37052 | Ca(ICCV2/PI489777)SNP_05836 | 194  | C | A | 4   | 7  | --        | --   |
|            | Ca(ICCV2/PI489777)SNP_05837 | 1399 | T | A | 19  | 10 | --        | --   |
| CakTC08596 | Ca(ICCV2/PI489777)SNP_05838 | 113  | T | C | 15  | 10 | --        | --   |
|            | Ca(ICCV2/PI489777)SNP_05839 | 171  | A | T | 42  | 16 | --        | --   |
|            | Ca(ICCV2/PI489777)SNP_05840 | 900  | T | A | 65  | 21 | --        | --   |
|            | Ca(ICCV2/PI489777)SNP_05841 | 957  | T | C | 61  | 20 | --        | --   |

|            |                            |      |   |   |    |    |        |      |
|------------|----------------------------|------|---|---|----|----|--------|------|
|            | Ca(ICC2/PI489777)SNP_05842 | 1150 | A | T | 70 | 22 | --     | --   |
| CakTC28347 | Ca(ICC2/PI489777)SNP_05843 | 519  | T | C | 3  | 3  | --     | --   |
|            | Ca(ICC2/PI489777)SNP_05844 | 1790 | G | A | 4  | 3  | --     | --   |
| CakTC25979 | Ca(ICC2/PI489777)SNP_05845 | 444  | A | G | 4  | 4  | --     | --   |
|            | Ca(ICC2/PI489777)SNP_05846 | 1886 | C | T | 3  | 3  | --     | --   |
|            | Ca(ICC2/PI489777)SNP_05847 | 1955 | C | T | 4  | 3  | --     | --   |
| CakTC42861 | Ca(ICC2/PI489777)SNP_05848 | 191  | T | C | 13 | 5  | --     | --   |
|            | Ca(ICC2/PI489777)SNP_05849 | 416  | G | A | 20 | 6  | --     | --   |
|            | Ca(ICC2/PI489777)SNP_05850 | 810  | T | G | 14 | 10 | --     | --   |
| CakTC37762 | Ca(ICC2/PI489777)SNP_05851 | 562  | A | G | 16 | 12 | --     | --   |
|            | Ca(ICC2/PI489777)SNP_05852 | 607  | T | C | 18 | 17 | --     | --   |
|            | Ca(ICC2/PI489777)SNP_05853 | 682  | G | T | 19 | 13 | --     | --   |
| CakTC34972 | Ca(ICC2/PI489777)SNP_05854 | 646  | A | G | 10 | 7  | --     | --   |
| CakTC23320 | Ca(ICC2/PI489777)SNP_05855 | 1292 | A | T | 5  | 4  | --     | --   |
| CakTC38213 | Ca(ICC2/PI489777)SNP_05856 | 158  | T | C | 7  | 6  | --     | --   |
|            | Ca(ICC2/PI489777)SNP_05857 | 638  | T | C | 59 | 47 | --     | --   |
| CakTC10708 | Ca(ICC2/PI489777)SNP_05858 | 1061 | C | T | 19 | 14 | --     | --   |
| CakTC37614 | Ca(ICC2/PI489777)SNP_05859 | 95   | A | G | 28 | 9  | --     | --   |
| CakTC24266 | Ca(ICC2/PI489777)SNP_05860 | 1682 | G | A | 20 | 6  | --     | --   |
| CakTC14228 | Ca(ICC2/PI489777)SNP_05861 | 2562 | C | T | 5  | 6  | --     | --   |
| CakTC13196 | Ca(ICC2/PI489777)SNP_05862 | 316  | A | C | 10 | 9  | --     | --   |
|            | Ca(ICC2/PI489777)SNP_05863 | 390  | C | G | 21 | 12 | --     | --   |
|            | Ca(ICC2/PI489777)SNP_05864 | 526  | C | T | 12 | 12 | --     | --   |
|            | Ca(ICC2/PI489777)SNP_05865 | 711  | A | G | 14 | 8  | --     | --   |
| CakTC26712 | Ca(ICC2/PI489777)SNP_05866 | 586  | A | G | 27 | 16 | --     | --   |
| CakTC25620 | Ca(ICC2/PI489777)SNP_05867 | 565  | T | A | 3  | 3  | Flower | bud  |
| CakTC36547 | Ca(ICC2/PI489777)SNP_05868 | 1498 | C | G | 3  | 5  | --     | --   |
| CakTC33437 | Ca(ICC2/PI489777)SNP_05869 | 291  | C | T | 7  | 11 | --     | --   |
|            | Ca(ICC2/PI489777)SNP_05870 | 527  | G | C | 7  | 13 | --     | --   |
| CakTC43297 | Ca(ICC2/PI489777)SNP_05871 | 510  | A | G | 50 | 13 | --     | --   |
|            | Ca(ICC2/PI489777)SNP_05872 | 968  | T | C | 23 | 20 | --     | --   |
| CakTC15365 | Ca(ICC2/PI489777)SNP_05873 | 992  | T | C | 6  | 6  | --     | --   |
|            | Ca(ICC2/PI489777)SNP_05874 | 1094 | T | C | 8  | 5  | --     | --   |
|            | Ca(ICC2/PI489777)SNP_05875 | 1559 | T | C | 9  | 4  | --     | --   |
|            | Ca(ICC2/PI489777)SNP_05876 | 3260 | C | T | 11 | 5  | --     | --   |
|            | Ca(ICC2/PI489777)SNP_05877 | 3707 | T | C | 3  | 6  | --     | --   |
| CakTC23956 | Ca(ICC2/PI489777)SNP_05878 | 546  | T | C | 3  | 3  | --     | --   |
|            | Ca(ICC2/PI489777)SNP_05879 | 551  | A | G | 3  | 3  | --     | --   |
|            | Ca(ICC2/PI489777)SNP_05880 | 557  | G | C | 3  | 3  | --     | --   |
| CakTC40534 | Ca(ICC2/PI489777)SNP_05881 | 1078 | G | A | 4  | 3  | --     | --   |
| CakTC26668 | Ca(ICC2/PI489777)SNP_05882 | 1376 | C | T | 13 | 21 | --     | --   |
|            | Ca(ICC2/PI489777)SNP_05883 | 1409 | G | T | 15 | 23 | --     | --   |
|            | Ca(ICC2/PI489777)SNP_05884 | 1493 | G | A | 13 | 22 | --     | --   |
|            | Ca(ICC2/PI489777)SNP_05885 | 1538 | G | A | 14 | 26 | --     | --   |
|            | Ca(ICC2/PI489777)SNP_05886 | 1836 | G | A | 6  | 5  | --     | --   |
| CakTC11873 | Ca(ICC2/PI489777)SNP_05887 | 495  | T | C | 5  | 8  | --     | C3H  |
| CakTC42995 | Ca(ICC2/PI489777)SNP_05888 | 165  | G | A | 10 | 10 | --     | --   |
|            | Ca(ICC2/PI489777)SNP_05889 | 1614 | G | T | 11 | 7  | --     | --   |
| CakTC30899 | Ca(ICC2/PI489777)SNP_05890 | 1121 | G | A | 5  | 4  | --     | --   |
| CakTC11091 | Ca(ICC2/PI489777)SNP_05891 | 346  | C | T | 5  | 6  | --     | --   |
|            | Ca(ICC2/PI489777)SNP_05892 | 436  | A | G | 6  | 6  | --     | --   |
|            | Ca(ICC2/PI489777)SNP_05893 | 1177 | C | T | 11 | 6  | --     | --   |
|            | Ca(ICC2/PI489777)SNP_05894 | 1185 | G | A | 12 | 6  | --     | --   |
|            | Ca(ICC2/PI489777)SNP_05895 | 1275 | G | C | 11 | 4  | --     | --   |
|            | Ca(ICC2/PI489777)SNP_05896 | 2773 | G | C | 16 | 5  | --     | --   |
| CakTC43253 | Ca(ICC2/PI489777)SNP_05897 | 840  | T | A | 16 | 6  | --     | --   |
| CakTC31185 | Ca(ICC2/PI489777)SNP_05898 | 719  | A | C | 5  | 5  | --     | --   |
| CakTC35847 | Ca(ICC2/PI489777)SNP_05899 | 163  | G | T | 12 | 4  | --     | --   |
|            | Ca(ICC2/PI489777)SNP_05900 | 746  | T | C | 16 | 7  | --     | --   |
|            | Ca(ICC2/PI489777)SNP_05901 | 1853 | C | A | 14 | 8  | --     | --   |
| CakTC22357 | Ca(ICC2/PI489777)SNP_05902 | 741  | C | T | 6  | 4  | --     | --   |
|            | Ca(ICC2/PI489777)SNP_05903 | 1635 | G | A | 6  | 5  | --     | --   |
|            | Ca(ICC2/PI489777)SNP_05904 | 1815 | C | T | 4  | 6  | --     | --   |
|            | Ca(ICC2/PI489777)SNP_05905 | 2312 | T | C | 9  | 3  | --     | --   |
| CakTC36441 | Ca(ICC2/PI489777)SNP_05906 | 499  | A | T | 9  | 13 | --     | SNF2 |
|            | Ca(ICC2/PI489777)SNP_05907 | 629  | A | C | 14 | 8  | --     | SNF2 |
|            | Ca(ICC2/PI489777)SNP_05908 | 786  | A | G | 26 | 5  | --     | SNF2 |
|            | Ca(ICC2/PI489777)SNP_05909 | 900  | G | A | 20 | 4  | --     | SNF2 |
|            | Ca(ICC2/PI489777)SNP_05910 | 1238 | T | G | 13 | 6  | --     | SNF2 |
|            | Ca(ICC2/PI489777)SNP_05911 | 1533 | A | T | 16 | 4  | --     | SNF2 |
|            | Ca(ICC2/PI489777)SNP_05912 | 1845 | T | A | 24 | 7  | --     | SNF2 |
|            | Ca(ICC2/PI489777)SNP_05913 | 2271 | A | G | 13 | 10 | --     | SNF2 |
|            | Ca(ICC2/PI489777)SNP_05914 | 2412 | G | A | 9  | 8  | --     | SNF2 |
|            | Ca(ICC2/PI489777)SNP_05915 | 2718 | A | G | 13 | 13 | --     | SNF2 |



|            |                            |      |   |   |    |    |      |      |
|------------|----------------------------|------|---|---|----|----|------|------|
|            | Ca(ICC2/PI489777)SNP_05916 | 3644 | G | A | 20 | 5  | --   | SNF2 |
|            | Ca(ICC2/PI489777)SNP_05917 | 3722 | T | C | 19 | 5  | --   | SNF2 |
|            | Ca(ICC2/PI489777)SNP_05918 | 3854 | G | A | 18 | 6  | --   | SNF2 |
| CakTC27513 | Ca(ICC2/PI489777)SNP_05919 | 604  | T | G | 12 | 8  | --   | --   |
|            | Ca(ICC2/PI489777)SNP_05920 | 1078 | C | T | 13 | 10 | --   | --   |
|            | Ca(ICC2/PI489777)SNP_05921 | 1105 | C | A | 14 | 11 | --   | --   |
|            | Ca(ICC2/PI489777)SNP_05922 | 1180 | A | G | 9  | 12 | --   | --   |
| CakTC26295 | Ca(ICC2/PI489777)SNP_05923 | 635  | A | G | 10 | 7  | --   | GRAS |
| CakTC08088 | Ca(ICC2/PI489777)SNP_05924 | 747  | A | G | 6  | 3  | --   | --   |
| CakTC42044 | Ca(ICC2/PI489777)SNP_05925 | 86   | T | A | 10 | 7  | --   | --   |
|            | Ca(ICC2/PI489777)SNP_05926 | 230  | T | C | 11 | 7  | --   | --   |
|            | Ca(ICC2/PI489777)SNP_05927 | 932  | A | G | 5  | 3  | --   | --   |
|            | Ca(ICC2/PI489777)SNP_05928 | 1039 | T | C | 5  | 4  | --   | --   |
|            | Ca(ICC2/PI489777)SNP_05929 | 1064 | T | C | 4  | 4  | --   | --   |
|            | Ca(ICC2/PI489777)SNP_05930 | 1494 | G | A | 8  | 4  | --   | --   |
|            | Ca(ICC2/PI489777)SNP_05931 | 1970 | C | T | 3  | 3  | --   | --   |
| CakTC38230 | Ca(ICC2/PI489777)SNP_05932 | 48   | A | T | 5  | 13 | --   | --   |
|            | Ca(ICC2/PI489777)SNP_05933 | 327  | T | C | 31 | 55 | --   | --   |
|            | Ca(ICC2/PI489777)SNP_05934 | 333  | T | C | 32 | 56 | --   | --   |
|            | Ca(ICC2/PI489777)SNP_05935 | 1009 | C | T | 8  | 5  | --   | --   |
| CakTC37370 | Ca(ICC2/PI489777)SNP_05936 | 395  | C | T | 4  | 6  | --   | --   |
|            | Ca(ICC2/PI489777)SNP_05937 | 817  | A | C | 8  | 6  | --   | --   |
| CakTC09975 | Ca(ICC2/PI489777)SNP_05938 | 1314 | C | A | 13 | 4  | --   | --   |
| CakTC29901 | Ca(ICC2/PI489777)SNP_05939 | 926  | T | C | 27 | 8  | --   | C3H  |
|            | Ca(ICC2/PI489777)SNP_05940 | 1334 | T | C | 27 | 18 | --   | C3H  |
| CakTC36159 | Ca(ICC2/PI489777)SNP_05941 | 604  | G | A | 5  | 4  | --   | --   |
|            | Ca(ICC2/PI489777)SNP_05942 | 919  | C | T | 6  | 3  | --   | --   |
|            | Ca(ICC2/PI489777)SNP_05943 | 1108 | G | A | 6  | 6  | --   | --   |
|            | Ca(ICC2/PI489777)SNP_05944 | 2306 | T | C | 3  | 3  | --   | --   |
| CakTC33884 | Ca(ICC2/PI489777)SNP_05945 | 256  | T | A | 16 | 12 | --   | --   |
|            | Ca(ICC2/PI489777)SNP_05946 | 719  | T | C | 23 | 17 | --   | --   |
|            | Ca(ICC2/PI489777)SNP_05947 | 1567 | A | G | 10 | 13 | --   | --   |
|            | Ca(ICC2/PI489777)SNP_05948 | 1723 | G | A | 18 | 17 | --   | --   |
| CakTC42706 | Ca(ICC2/PI489777)SNP_05949 | 347  | T | C | 13 | 22 | --   | --   |
| CakTC42724 | Ca(ICC2/PI489777)SNP_05950 | 209  | T | A | 70 | 29 | --   | --   |
|            | Ca(ICC2/PI489777)SNP_05951 | 214  | T | A | 77 | 33 | --   | --   |
|            | Ca(ICC2/PI489777)SNP_05952 | 224  | T | C | 75 | 29 | --   | --   |
|            | Ca(ICC2/PI489777)SNP_05953 | 275  | T | C | 76 | 35 | --   | --   |
|            | Ca(ICC2/PI489777)SNP_05954 | 660  | C | G | 14 | 9  | --   | --   |
|            | Ca(ICC2/PI489777)SNP_05955 | 791  | C | T | 10 | 3  | --   | --   |
|            | Ca(ICC2/PI489777)SNP_05956 | 861  | A | T | 7  | 3  | --   | --   |
| CakTC29599 | Ca(ICC2/PI489777)SNP_05957 | 174  | A | T | 3  | 10 | Root | --   |
|            | Ca(ICC2/PI489777)SNP_05958 | 628  | T | G | 4  | 7  | Root | --   |
|            | Ca(ICC2/PI489777)SNP_05959 | 1344 | T | C | 9  | 19 | Root | --   |
|            | Ca(ICC2/PI489777)SNP_05960 | 1569 | C | A | 4  | 6  | Root | --   |
| CakTC10007 | Ca(ICC2/PI489777)SNP_05961 | 1523 | T | C | 10 | 3  | --   | --   |
|            | Ca(ICC2/PI489777)SNP_05962 | 1727 | A | G | 12 | 6  | --   | --   |
| CakTC26540 | Ca(ICC2/PI489777)SNP_05963 | 724  | T | C | 3  | 4  | --   | --   |
|            | Ca(ICC2/PI489777)SNP_05964 | 847  | G | A | 5  | 4  | --   | --   |
|            | Ca(ICC2/PI489777)SNP_05965 | 1021 | A | G | 6  | 8  | --   | --   |
| CakTC42984 | Ca(ICC2/PI489777)SNP_05966 | 355  | A | G | 10 | 4  | --   | --   |
| CakTC28253 | Ca(ICC2/PI489777)SNP_05967 | 253  | T | C | 7  | 4  | --   | --   |
|            | Ca(ICC2/PI489777)SNP_05968 | 366  | G | A | 8  | 6  | --   | --   |
|            | Ca(ICC2/PI489777)SNP_05969 | 963  | G | C | 8  | 4  | --   | --   |
| CakTC42622 | Ca(ICC2/PI489777)SNP_05970 | 61   | T | G | 21 | 6  | --   | Tify |
|            | Ca(ICC2/PI489777)SNP_05971 | 64   | T | G | 21 | 6  | --   | Tify |
|            | Ca(ICC2/PI489777)SNP_05972 | 333  | C | G | 25 | 11 | --   | Tify |
| CakTC34146 | Ca(ICC2/PI489777)SNP_05973 | 1597 | A | G | 4  | 4  | --   | C3H  |
| CakTC24566 | Ca(ICC2/PI489777)SNP_05974 | 671  | G | A | 85 | 17 | --   | --   |
|            | Ca(ICC2/PI489777)SNP_05975 | 850  | G | A | 93 | 29 | --   | --   |
|            | Ca(ICC2/PI489777)SNP_05976 | 1606 | G | A | 56 | 20 | --   | --   |
|            | Ca(ICC2/PI489777)SNP_05977 | 3092 | A | G | 58 | 19 | --   | --   |
|            | Ca(ICC2/PI489777)SNP_05978 | 3114 | T | G | 54 | 17 | --   | --   |
| CakTC05276 | Ca(ICC2/PI489777)SNP_05979 | 615  | T | A | 81 | 89 | --   | --   |
| CakTC23374 | Ca(ICC2/PI489777)SNP_05980 | 1485 | A | G | 3  | 4  | --   | --   |
|            | Ca(ICC2/PI489777)SNP_05981 | 2281 | G | A | 8  | 6  | --   | --   |
|            | Ca(ICC2/PI489777)SNP_05982 | 2459 | T | C | 8  | 3  | --   | --   |
| CakTC39262 | Ca(ICC2/PI489777)SNP_05983 | 1073 | A | G | 21 | 8  | --   | --   |
| CakTC10137 | Ca(ICC2/PI489777)SNP_05984 | 80   | T | C | 8  | 6  | --   | --   |
|            | Ca(ICC2/PI489777)SNP_05985 | 108  | C | T | 8  | 6  | --   | --   |
|            | Ca(ICC2/PI489777)SNP_05986 | 171  | T | C | 8  | 7  | --   | --   |
|            | Ca(ICC2/PI489777)SNP_05987 | 175  | C | T | 10 | 7  | --   | --   |
|            | Ca(ICC2/PI489777)SNP_05988 | 218  | G | A | 10 | 6  | --   | --   |
|            | Ca(ICC2/PI489777)SNP_05989 | 268  | T | C | 10 | 6  | --   | --   |

|            |                             |      |   |   |     |    |           |      |
|------------|-----------------------------|------|---|---|-----|----|-----------|------|
|            | Ca(ICCV2/PI489777)SNP_05990 | 304  | G | T | 11  | 6  | --        | --   |
|            | Ca(ICCV2/PI489777)SNP_05991 | 308  | T | C | 11  | 6  | --        | --   |
|            | Ca(ICCV2/PI489777)SNP_05992 | 326  | G | A | 11  | 6  | --        | --   |
|            | Ca(ICCV2/PI489777)SNP_05993 | 343  | C | T | 9   | 6  | --        | --   |
|            | Ca(ICCV2/PI489777)SNP_05994 | 448  | A | G | 9   | 4  | --        | --   |
|            | Ca(ICCV2/PI489777)SNP_05995 | 504  | C | T | 5   | 3  | --        | --   |
| CakTC42894 | Ca(ICCV2/PI489777)SNP_05996 | 129  | A | C | 12  | 16 | --        | --   |
|            | Ca(ICCV2/PI489777)SNP_05997 | 250  | T | C | 24  | 21 | --        | --   |
| CakTC09839 | Ca(ICCV2/PI489777)SNP_05998 | 2096 | T | C | 8   | 3  | --        | --   |
| CakTC36831 | Ca(ICCV2/PI489777)SNP_05999 | 1562 | T | C | 23  | 9  | --        | --   |
|            | Ca(ICCV2/PI489777)SNP_06000 | 2257 | G | A | 11  | 9  | --        | --   |
| CakTC39745 | Ca(ICCV2/PI489777)SNP_06001 | 292  | C | T | 16  | 4  | --        | --   |
|            | Ca(ICCV2/PI489777)SNP_06002 | 403  | C | T | 13  | 3  | --        | --   |
| CakTC28580 | Ca(ICCV2/PI489777)SNP_06003 | 564  | T | C | 6   | 6  | --        | --   |
|            | Ca(ICCV2/PI489777)SNP_06004 | 582  | G | A | 7   | 7  | --        | --   |
|            | Ca(ICCV2/PI489777)SNP_06005 | 1168 | C | A | 7   | 12 | --        | --   |
| CakTC30046 | Ca(ICCV2/PI489777)SNP_06006 | 1310 | T | C | 7   | 6  | --        | --   |
| CakTC39289 | Ca(ICCV2/PI489777)SNP_06007 | 300  | C | T | 4   | 4  | --        | --   |
|            | Ca(ICCV2/PI489777)SNP_06008 | 398  | A | G | 7   | 4  | --        | --   |
|            | Ca(ICCV2/PI489777)SNP_06009 | 407  | A | G | 3   | 3  | --        | --   |
| CakTC23076 | Ca(ICCV2/PI489777)SNP_06010 | 104  | C | T | 23  | 3  | --        | --   |
|            | Ca(ICCV2/PI489777)SNP_06011 | 107  | C | G | 24  | 3  | --        | --   |
| CakTC12146 | Ca(ICCV2/PI489777)SNP_06012 | 210  | C | T | 8   | 5  | --        | --   |
|            | Ca(ICCV2/PI489777)SNP_06013 | 266  | G | A | 10  | 5  | --        | --   |
| CakTC34618 | Ca(ICCV2/PI489777)SNP_06014 | 54   | C | A | 4   | 7  | --        | --   |
|            | Ca(ICCV2/PI489777)SNP_06015 | 395  | T | A | 8   | 8  | --        | --   |
|            | Ca(ICCV2/PI489777)SNP_06016 | 396  | T | G | 8   | 8  | --        | --   |
|            | Ca(ICCV2/PI489777)SNP_06017 | 472  | A | G | 5   | 5  | --        | --   |
| CakTC31410 | Ca(ICCV2/PI489777)SNP_06018 | 928  | T | C | 9   | 3  | --        | bZIP |
| CakTC40492 | Ca(ICCV2/PI489777)SNP_06019 | 476  | T | G | 12  | 13 | --        | --   |
|            | Ca(ICCV2/PI489777)SNP_06020 | 710  | C | G | 8   | 9  | --        | --   |
| CakTC23506 | Ca(ICCV2/PI489777)SNP_06021 | 263  | A | G | 6   | 4  | --        | --   |
| CakTC08782 | Ca(ICCV2/PI489777)SNP_06022 | 639  | T | C | 4   | 5  | --        | --   |
|            | Ca(ICCV2/PI489777)SNP_06023 | 885  | T | C | 6   | 3  | --        | --   |
|            | Ca(ICCV2/PI489777)SNP_06024 | 981  | C | G | 7   | 3  | --        | --   |
|            | Ca(ICCV2/PI489777)SNP_06025 | 1101 | C | T | 7   | 3  | --        | --   |
|            | Ca(ICCV2/PI489777)SNP_06026 | 1362 | C | T | 11  | 9  | --        | --   |
|            | Ca(ICCV2/PI489777)SNP_06027 | 1483 | T | G | 10  | 13 | --        | --   |
|            | Ca(ICCV2/PI489777)SNP_06028 | 1591 | G | T | 10  | 7  | --        | --   |
|            | Ca(ICCV2/PI489777)SNP_06029 | 1626 | T | C | 10  | 8  | --        | --   |
|            | Ca(ICCV2/PI489777)SNP_06030 | 1631 | T | G | 10  | 8  | --        | --   |
|            | Ca(ICCV2/PI489777)SNP_06031 | 1654 | G | A | 8   | 6  | --        | --   |
| CakTC26542 | Ca(ICCV2/PI489777)SNP_06032 | 438  | G | C | 49  | 14 | --        | --   |
| CakTC39171 | Ca(ICCV2/PI489777)SNP_06033 | 1434 | G | T | 8   | 3  | --        | --   |
| CakTC09253 | Ca(ICCV2/PI489777)SNP_06034 | 1031 | C | T | 3   | 4  | --        | --   |
| CakTC29824 | Ca(ICCV2/PI489777)SNP_06035 | 251  | A | T | 82  | 82 | --        | --   |
|            | Ca(ICCV2/PI489777)SNP_06036 | 1132 | A | G | 124 | 87 | --        | --   |
| CakTC41473 | Ca(ICCV2/PI489777)SNP_06037 | 1802 | T | G | 28  | 27 | --        | --   |
| CakTC24127 | Ca(ICCV2/PI489777)SNP_06038 | 1992 | C | T | 35  | 6  | --        | --   |
|            | Ca(ICCV2/PI489777)SNP_06039 | 2652 | T | C | 26  | 7  | --        | --   |
| CakTC40069 | Ca(ICCV2/PI489777)SNP_06040 | 236  | A | G | 52  | 13 | --        | --   |
|            | Ca(ICCV2/PI489777)SNP_06041 | 830  | T | A | 38  | 22 | --        | --   |
|            | Ca(ICCV2/PI489777)SNP_06042 | 854  | A | T | 46  | 20 | --        | --   |
| CakTC27709 | Ca(ICCV2/PI489777)SNP_06043 | 386  | G | A | 3   | 4  | --        | --   |
| CakTC24277 | Ca(ICCV2/PI489777)SNP_06044 | 128  | A | G | 17  | 15 | --        | --   |
|            | Ca(ICCV2/PI489777)SNP_06045 | 498  | G | A | 40  | 31 | --        | --   |
|            | Ca(ICCV2/PI489777)SNP_06046 | 500  | G | A | 39  | 27 | --        | --   |
| CakTC22280 | Ca(ICCV2/PI489777)SNP_06047 | 180  | A | G | 17  | 25 | --        | --   |
|            | Ca(ICCV2/PI489777)SNP_06048 | 244  | G | A | 31  | 41 | --        | --   |
|            | Ca(ICCV2/PI489777)SNP_06049 | 350  | T | C | 43  | 42 | --        | --   |
|            | Ca(ICCV2/PI489777)SNP_06050 | 407  | T | G | 49  | 22 | --        | --   |
|            | Ca(ICCV2/PI489777)SNP_06051 | 1214 | A | G | 31  | 17 | --        | --   |
| CakTC31158 | Ca(ICCV2/PI489777)SNP_06052 | 544  | T | C | 8   | 7  | --        | --   |
|            | Ca(ICCV2/PI489777)SNP_06053 | 736  | G | C | 15  | 3  | --        | --   |
|            | Ca(ICCV2/PI489777)SNP_06054 | 1046 | C | T | 11  | 3  | --        | --   |
|            | Ca(ICCV2/PI489777)SNP_06055 | 1069 | C | T | 13  | 4  | --        | --   |
| CakTC25308 | Ca(ICCV2/PI489777)SNP_06056 | 1560 | G | A | 20  | 9  | Young_pod | --   |
| CakTC42775 | Ca(ICCV2/PI489777)SNP_06057 | 120  | T | C | 8   | 4  | --        | TPR  |
|            | Ca(ICCV2/PI489777)SNP_06058 | 337  | G | A | 15  | 15 | --        | TPR  |
|            | Ca(ICCV2/PI489777)SNP_06059 | 1390 | G | T | 12  | 11 | --        | TPR  |
| CakTC28222 | Ca(ICCV2/PI489777)SNP_06060 | 1160 | C | T | 9   | 5  | --        | --   |
|            | Ca(ICCV2/PI489777)SNP_06061 | 1175 | C | T | 9   | 4  | --        | --   |
|            | Ca(ICCV2/PI489777)SNP_06062 | 2113 | T | C | 32  | 9  | --        | --   |
| CakTC28450 | Ca(ICCV2/PI489777)SNP_06063 | 126  | A | T | 12  | 6  | --        | --   |

|            |                            |      |   |   |     |    |        |             |
|------------|----------------------------|------|---|---|-----|----|--------|-------------|
|            | Ca(ICC2/PI489777)SNP_06064 | 212  | G | A | 20  | 5  | --     | --          |
|            | Ca(ICC2/PI489777)SNP_06065 | 269  | G | A | 24  | 10 | --     | --          |
|            | Ca(ICC2/PI489777)SNP_06066 | 305  | C | T | 29  | 11 | --     | --          |
|            | Ca(ICC2/PI489777)SNP_06067 | 319  | A | C | 28  | 10 | --     | --          |
|            | Ca(ICC2/PI489777)SNP_06068 | 481  | A | G | 27  | 9  | --     | --          |
|            | Ca(ICC2/PI489777)SNP_06069 | 622  | C | T | 23  | 6  | --     | --          |
|            | Ca(ICC2/PI489777)SNP_06070 | 769  | C | T | 24  | 5  | --     | --          |
|            | Ca(ICC2/PI489777)SNP_06071 | 858  | G | A | 29  | 4  | --     | --          |
|            | Ca(ICC2/PI489777)SNP_06072 | 1088 | T | G | 30  | 8  | --     | --          |
|            | Ca(ICC2/PI489777)SNP_06073 | 1715 | A | G | 13  | 3  | --     | --          |
| CakTC31788 | Ca(ICC2/PI489777)SNP_06074 | 1229 | T | C | 4   | 3  | --     | --          |
|            | Ca(ICC2/PI489777)SNP_06075 | 1238 | G | A | 5   | 3  | --     | --          |
|            | Ca(ICC2/PI489777)SNP_06076 | 1240 | T | C | 5   | 3  | --     | --          |
| CakTC29622 | Ca(ICC2/PI489777)SNP_06077 | 158  | A | G | 6   | 4  | --     | --          |
|            | Ca(ICC2/PI489777)SNP_06078 | 983  | T | C | 8   | 10 | --     | --          |
| CakTC37626 | Ca(ICC2/PI489777)SNP_06079 | 500  | G | C | 24  | 13 | --     | --          |
|            | Ca(ICC2/PI489777)SNP_06080 | 902  | A | G | 18  | 18 | --     | --          |
|            | Ca(ICC2/PI489777)SNP_06081 | 1001 | G | T | 12  | 7  | --     | --          |
| CakTC43307 | Ca(ICC2/PI489777)SNP_06082 | 131  | G | A | 3   | 8  | --     | --          |
|            | Ca(ICC2/PI489777)SNP_06083 | 532  | G | A | 4   | 3  | --     | --          |
|            | Ca(ICC2/PI489777)SNP_06084 | 541  | G | A | 4   | 3  | --     | --          |
|            | Ca(ICC2/PI489777)SNP_06085 | 586  | A | G | 3   | 3  | --     | --          |
| CakTC42684 | Ca(ICC2/PI489777)SNP_06086 | 558  | T | A | 15  | 12 | --     | --          |
|            | Ca(ICC2/PI489777)SNP_06087 | 972  | C | T | 29  | 6  | --     | --          |
|            | Ca(ICC2/PI489777)SNP_06088 | 1329 | C | A | 16  | 4  | --     | --          |
|            | Ca(ICC2/PI489777)SNP_06089 | 1692 | T | A | 7   | 3  | --     | --          |
| CakTC37754 | Ca(ICC2/PI489777)SNP_06090 | 273  | T | A | 6   | 8  | --     | --          |
|            | Ca(ICC2/PI489777)SNP_06091 | 335  | G | C | 5   | 7  | --     | --          |
|            | Ca(ICC2/PI489777)SNP_06092 | 346  | T | C | 5   | 7  | --     | --          |
|            | Ca(ICC2/PI489777)SNP_06093 | 351  | G | A | 6   | 7  | --     | --          |
| CakTC29693 | Ca(ICC2/PI489777)SNP_06094 | 132  | G | T | 36  | 28 | --     | --          |
|            | Ca(ICC2/PI489777)SNP_06095 | 426  | A | G | 174 | 71 | --     | --          |
| CakTC34572 | Ca(ICC2/PI489777)SNP_06096 | 126  | A | G | 5   | 13 | --     | --          |
| CakTC27262 | Ca(ICC2/PI489777)SNP_06097 | 109  | C | T | 3   | 4  | --     | --          |
|            | Ca(ICC2/PI489777)SNP_06098 | 187  | T | C | 4   | 3  | --     | --          |
|            | Ca(ICC2/PI489777)SNP_06099 | 365  | C | G | 4   | 5  | --     | --          |
|            | Ca(ICC2/PI489777)SNP_06100 | 411  | G | A | 4   | 6  | --     | --          |
|            | Ca(ICC2/PI489777)SNP_06101 | 592  | G | A | 90  | 42 | --     | --          |
|            | Ca(ICC2/PI489777)SNP_06102 | 1298 | G | A | 93  | 15 | --     | --          |
| CakTC07433 | Ca(ICC2/PI489777)SNP_06103 | 518  | T | C | 20  | 14 | --     | --          |
|            | Ca(ICC2/PI489777)SNP_06104 | 551  | A | G | 22  | 14 | --     | --          |
| CakTC37731 | Ca(ICC2/PI489777)SNP_06105 | 122  | G | T | 4   | 6  | --     | --          |
| CakTC37695 | Ca(ICC2/PI489777)SNP_06106 | 894  | G | T | 13  | 10 | --     | --          |
| CakTC28371 | Ca(ICC2/PI489777)SNP_06107 | 735  | A | G | 3   | 3  | --     | --          |
|            | Ca(ICC2/PI489777)SNP_06108 | 771  | C | T | 3   | 5  | --     | --          |
|            | Ca(ICC2/PI489777)SNP_06109 | 955  | A | G | 5   | 11 | --     | --          |
|            | Ca(ICC2/PI489777)SNP_06110 | 1035 | T | C | 5   | 11 | --     | --          |
|            | Ca(ICC2/PI489777)SNP_06111 | 1396 | G | T | 3   | 3  | --     | --          |
| CakTC39443 | Ca(ICC2/PI489777)SNP_06112 | 805  | T | G | 9   | 4  | --     | --          |
|            | Ca(ICC2/PI489777)SNP_06113 | 1038 | C | T | 7   | 11 | --     | --          |
| CakTC29560 | Ca(ICC2/PI489777)SNP_06114 | 30   | A | G | 8   | 12 | --     | MYB-related |
|            | Ca(ICC2/PI489777)SNP_06115 | 40   | C | T | 11  | 11 | --     | MYB-related |
|            | Ca(ICC2/PI489777)SNP_06116 | 87   | C | G | 13  | 10 | --     | MYB-related |
| CakTC13158 | Ca(ICC2/PI489777)SNP_06117 | 332  | C | A | 33  | 4  | --     | --          |
| CakTC42268 | Ca(ICC2/PI489777)SNP_06118 | 792  | G | C | 29  | 9  | --     | C2C2-GATA   |
|            | Ca(ICC2/PI489777)SNP_06119 | 916  | A | G | 21  | 5  | --     | C2C2-GATA   |
|            | Ca(ICC2/PI489777)SNP_06120 | 947  | A | G | 17  | 4  | --     | C2C2-GATA   |
|            | Ca(ICC2/PI489777)SNP_06121 | 1113 | G | C | 12  | 3  | --     | C2C2-GATA   |
|            | Ca(ICC2/PI489777)SNP_06122 | 1170 | A | C | 9   | 3  | --     | C2C2-GATA   |
|            | Ca(ICC2/PI489777)SNP_06123 | 1428 | G | A | 5   | 3  | --     | C2C2-GATA   |
|            | Ca(ICC2/PI489777)SNP_06124 | 1488 | G | A | 3   | 3  | --     | C2C2-GATA   |
|            | Ca(ICC2/PI489777)SNP_06125 | 1521 | A | G | 4   | 3  | --     | C2C2-GATA   |
| CakTC31319 | Ca(ICC2/PI489777)SNP_06126 | 91   | G | A | 9   | 3  | --     | --          |
|            | Ca(ICC2/PI489777)SNP_06127 | 93   | A | G | 9   | 3  | --     | --          |
|            | Ca(ICC2/PI489777)SNP_06128 | 131  | C | G | 20  | 16 | --     | --          |
| CakTC34726 | Ca(ICC2/PI489777)SNP_06129 | 3246 | G | C | 7   | 5  | --     | --          |
| CakTC31347 | Ca(ICC2/PI489777)SNP_06130 | 129  | A | T | 4   | 6  | Flower | bud         |
| CakTC30382 | Ca(ICC2/PI489777)SNP_06131 | 1697 | C | G | 4   | 4  | --     | TPR         |
| CakTC28202 | Ca(ICC2/PI489777)SNP_06132 | 66   | C | G | 17  | 13 | --     | --          |
|            | Ca(ICC2/PI489777)SNP_06133 | 215  | A | G | 34  | 17 | --     | --          |
|            | Ca(ICC2/PI489777)SNP_06134 | 495  | C | A | 27  | 5  | --     | --          |
|            | Ca(ICC2/PI489777)SNP_06135 | 650  | C | T | 41  | 14 | --     | --          |
|            | Ca(ICC2/PI489777)SNP_06136 | 848  | T | C | 55  | 36 | --     | --          |
|            | Ca(ICC2/PI489777)SNP_06137 | 1448 | T | A | 24  | 21 | --     | --          |

|            |                            |      |   |   |     |     |        |      |
|------------|----------------------------|------|---|---|-----|-----|--------|------|
|            | Ca(ICC2/PI489777)SNP_06138 | 1497 | A | G | 16  | 20  | --     | --   |
|            | Ca(ICC2/PI489777)SNP_06139 | 1533 | T | C | 14  | 16  | --     | --   |
| CakTC25170 | Ca(ICC2/PI489777)SNP_06140 | 275  | G | A | 10  | 6   | --     | --   |
|            | Ca(ICC2/PI489777)SNP_06141 | 1021 | T | C | 9   | 14  | --     | --   |
|            | Ca(ICC2/PI489777)SNP_06142 | 1108 | G | A | 7   | 13  | --     | --   |
|            | Ca(ICC2/PI489777)SNP_06143 | 1192 | C | A | 11  | 15  | --     | --   |
| CakTC39317 | Ca(ICC2/PI489777)SNP_06144 | 228  | A | G | 16  | 3   | --     | --   |
|            | Ca(ICC2/PI489777)SNP_06145 | 282  | C | T | 20  | 6   | --     | --   |
|            | Ca(ICC2/PI489777)SNP_06146 | 517  | C | T | 17  | 6   | --     | --   |
|            | Ca(ICC2/PI489777)SNP_06147 | 787  | T | C | 9   | 9   | --     | --   |
|            | Ca(ICC2/PI489777)SNP_06148 | 805  | G | A | 14  | 9   | --     | --   |
|            | Ca(ICC2/PI489777)SNP_06149 | 958  | C | G | 15  | 14  | --     | --   |
|            | Ca(ICC2/PI489777)SNP_06150 | 1034 | T | A | 16  | 16  | --     | --   |
|            | Ca(ICC2/PI489777)SNP_06151 | 1225 | C | T | 22  | 15  | --     | --   |
|            | Ca(ICC2/PI489777)SNP_06152 | 1464 | C | T | 20  | 9   | --     | --   |
| CakTC29816 | Ca(ICC2/PI489777)SNP_06153 | 1320 | A | G | 3   | 4   | --     | --   |
| CakTC42385 | Ca(ICC2/PI489777)SNP_06154 | 831  | G | A | 8   | 5   | --     | --   |
| CakTC22851 | Ca(ICC2/PI489777)SNP_06155 | 675  | T | C | 12  | 3   | --     | --   |
|            | Ca(ICC2/PI489777)SNP_06156 | 780  | A | G | 15  | 3   | --     | --   |
| CakTC39560 | Ca(ICC2/PI489777)SNP_06157 | 460  | C | A | 11  | 6   | --     | --   |
|            | Ca(ICC2/PI489777)SNP_06158 | 823  | A | C | 9   | 9   | --     | --   |
|            | Ca(ICC2/PI489777)SNP_06159 | 847  | A | G | 9   | 7   | --     | --   |
|            | Ca(ICC2/PI489777)SNP_06160 | 871  | C | T | 8   | 6   | --     | --   |
|            | Ca(ICC2/PI489777)SNP_06161 | 1518 | C | A | 15  | 4   | --     | --   |
|            | Ca(ICC2/PI489777)SNP_06162 | 1531 | G | C | 17  | 4   | --     | --   |
|            | Ca(ICC2/PI489777)SNP_06163 | 1637 | G | A | 9   | 4   | --     | --   |
| CakTC32294 | Ca(ICC2/PI489777)SNP_06164 | 763  | C | A | 11  | 10  | --     | C3H  |
| CakTC40803 | Ca(ICC2/PI489777)SNP_06165 | 934  | C | T | 107 | 129 | --     | --   |
| CakTC40488 | Ca(ICC2/PI489777)SNP_06166 | 69   | T | C | 4   | 8   | --     | --   |
|            | Ca(ICC2/PI489777)SNP_06167 | 94   | T | A | 6   | 8   | --     | --   |
|            | Ca(ICC2/PI489777)SNP_06168 | 145  | A | T | 11  | 11  | --     | --   |
|            | Ca(ICC2/PI489777)SNP_06169 | 208  | T | A | 19  | 30  | --     | --   |
|            | Ca(ICC2/PI489777)SNP_06170 | 316  | A | T | 26  | 34  | --     | --   |
|            | Ca(ICC2/PI489777)SNP_06171 | 317  | T | G | 26  | 33  | --     | --   |
|            | Ca(ICC2/PI489777)SNP_06172 | 347  | A | C | 30  | 39  | --     | --   |
|            | Ca(ICC2/PI489777)SNP_06173 | 662  | C | G | 23  | 27  | --     | --   |
| CakTC39732 | Ca(ICC2/PI489777)SNP_06174 | 115  | T | C | 10  | 11  | --     | --   |
| CakTC34578 | Ca(ICC2/PI489777)SNP_06175 | 36   | C | A | 4   | 4   | --     | --   |
|            | Ca(ICC2/PI489777)SNP_06176 | 109  | G | A | 5   | 8   | --     | --   |
|            | Ca(ICC2/PI489777)SNP_06177 | 139  | G | T | 5   | 7   | --     | --   |
|            | Ca(ICC2/PI489777)SNP_06178 | 539  | T | G | 3   | 7   | --     | --   |
| CakTC34291 | Ca(ICC2/PI489777)SNP_06179 | 338  | C | T | 7   | 6   | Flower | bud  |
|            | Ca(ICC2/PI489777)SNP_06180 | 464  | C | T | 3   | 5   | Flower | bud  |
|            | Ca(ICC2/PI489777)SNP_06181 | 527  | G | C | 4   | 7   | Flower | bud  |
|            | Ca(ICC2/PI489777)SNP_06182 | 1198 | A | G | 6   | 5   | Flower | bud  |
|            | Ca(ICC2/PI489777)SNP_06183 | 1331 | C | T | 8   | 6   | Flower | bud  |
| CakTC30280 | Ca(ICC2/PI489777)SNP_06184 | 161  | C | T | 8   | 3   | --     | --   |
|            | Ca(ICC2/PI489777)SNP_06185 | 748  | T | C | 12  | 13  | --     | --   |
| CakTC26825 | Ca(ICC2/PI489777)SNP_06186 | 83   | A | G | 6   | 5   | --     | --   |
|            | Ca(ICC2/PI489777)SNP_06187 | 175  | T | C | 10  | 14  | --     | --   |
|            | Ca(ICC2/PI489777)SNP_06188 | 249  | C | A | 20  | 12  | --     | --   |
|            | Ca(ICC2/PI489777)SNP_06189 | 293  | C | T | 23  | 16  | --     | --   |
|            | Ca(ICC2/PI489777)SNP_06190 | 2863 | T | C | 4   | 3   | --     | --   |
| CakTC25584 | Ca(ICC2/PI489777)SNP_06191 | 453  | C | T | 14  | 5   | --     | TRAF |
|            | Ca(ICC2/PI489777)SNP_06192 | 501  | G | A | 15  | 5   | --     | TRAF |
| CakTC27068 | Ca(ICC2/PI489777)SNP_06193 | 389  | C | T | 5   | 3   | --     | --   |
|            | Ca(ICC2/PI489777)SNP_06194 | 996  | A | G | 3   | 5   | --     | --   |
| CakTC10288 | Ca(ICC2/PI489777)SNP_06195 | 237  | C | T | 5   | 5   | --     | --   |
|            | Ca(ICC2/PI489777)SNP_06196 | 2268 | C | T | 5   | 4   | --     | --   |
| CakTC30951 | Ca(ICC2/PI489777)SNP_06197 | 1462 | T | C | 14  | 19  | --     | --   |
| CakTC36892 | Ca(ICC2/PI489777)SNP_06198 | 469  | G | A | 5   | 5   | --     | --   |
|            | Ca(ICC2/PI489777)SNP_06199 | 712  | G | A | 8   | 9   | --     | --   |
|            | Ca(ICC2/PI489777)SNP_06200 | 1621 | C | T | 15  | 4   | --     | --   |
|            | Ca(ICC2/PI489777)SNP_06201 | 1792 | T | C | 19  | 5   | --     | --   |
|            | Ca(ICC2/PI489777)SNP_06202 | 2463 | T | C | 9   | 4   | --     | --   |
|            | Ca(ICC2/PI489777)SNP_06203 | 2472 | T | G | 12  | 4   | --     | --   |
| CakTC37221 | Ca(ICC2/PI489777)SNP_06204 | 414  | A | C | 15  | 9   | --     | --   |
|            | Ca(ICC2/PI489777)SNP_06205 | 807  | T | C | 18  | 9   | --     | --   |
|            | Ca(ICC2/PI489777)SNP_06206 | 844  | T | C | 9   | 11  | --     | --   |
|            | Ca(ICC2/PI489777)SNP_06207 | 873  | T | C | 11  | 13  | --     | --   |
| CakTC40155 | Ca(ICC2/PI489777)SNP_06208 | 1343 | C | T | 20  | 15  | --     | --   |
| CakTC36601 | Ca(ICC2/PI489777)SNP_06209 | 1324 | A | G | 23  | 11  | --     | --   |
| CakTC28765 | Ca(ICC2/PI489777)SNP_06210 | 1175 | A | T | 24  | 5   | --     | --   |
|            | Ca(ICC2/PI489777)SNP_06211 | 1289 | C | A | 25  | 9   | --     | --   |

|            |                            |      |   |   |     |     |           |     |
|------------|----------------------------|------|---|---|-----|-----|-----------|-----|
|            | Ca(ICC2/PI489777)SNP_06212 | 1445 | G | A | 117 | 52  | --        | --  |
|            | Ca(ICC2/PI489777)SNP_06213 | 1473 | G | T | 114 | 42  | --        | --  |
| CakTC31232 | Ca(ICC2/PI489777)SNP_06214 | 429  | A | T | 6   | 5   | Young_pod | --  |
| CakTC24507 | Ca(ICC2/PI489777)SNP_06215 | 709  | C | T | 16  | 16  | --        | C3H |
|            | Ca(ICC2/PI489777)SNP_06216 | 1784 | G | A | 56  | 37  | --        | C3H |
| CakTC23018 | Ca(ICC2/PI489777)SNP_06217 | 707  | A | G | 19  | 4   | Shoot     | --  |
| CakTC42252 | Ca(ICC2/PI489777)SNP_06218 | 241  | T | C | 26  | 4   | --        | --  |
|            | Ca(ICC2/PI489777)SNP_06219 | 250  | A | G | 25  | 4   | --        | --  |
|            | Ca(ICC2/PI489777)SNP_06220 | 259  | A | C | 26  | 6   | --        | --  |
|            | Ca(ICC2/PI489777)SNP_06221 | 409  | G | A | 20  | 8   | --        | --  |
|            | Ca(ICC2/PI489777)SNP_06222 | 421  | T | C | 12  | 9   | --        | --  |
| CakTC37986 | Ca(ICC2/PI489777)SNP_06223 | 250  | A | G | 5   | 6   | --        | HB  |
|            | Ca(ICC2/PI489777)SNP_06224 | 975  | G | A | 12  | 7   | --        | HB  |
| CakTC25685 | Ca(ICC2/PI489777)SNP_06225 | 183  | G | T | 65  | 30  | --        | --  |
| CakTC23223 | Ca(ICC2/PI489777)SNP_06226 | 408  | C | T | 37  | 119 | --        | --  |
|            | Ca(ICC2/PI489777)SNP_06227 | 1106 | T | G | 103 | 58  | --        | --  |
|            | Ca(ICC2/PI489777)SNP_06228 | 1157 | A | T | 97  | 70  | --        | --  |
| CakTC34252 | Ca(ICC2/PI489777)SNP_06229 | 88   | G | C | 39  | 22  | --        | --  |
| CakTC39789 | Ca(ICC2/PI489777)SNP_06230 | 1197 | C | T | 20  | 27  | --        | --  |
|            | Ca(ICC2/PI489777)SNP_06231 | 1200 | A | G | 20  | 26  | --        | --  |
|            | Ca(ICC2/PI489777)SNP_06232 | 1387 | C | G | 33  | 25  | --        | --  |
|            | Ca(ICC2/PI489777)SNP_06233 | 1536 | A | T | 38  | 19  | --        | --  |
|            | Ca(ICC2/PI489777)SNP_06234 | 1715 | A | C | 9   | 9   | --        | --  |
| CakTC43211 | Ca(ICC2/PI489777)SNP_06235 | 1168 | G | T | 4   | 56  | --        | --  |
|            | Ca(ICC2/PI489777)SNP_06236 | 1512 | G | C | 4   | 6   | --        | --  |
|            | Ca(ICC2/PI489777)SNP_06237 | 1610 | A | T | 5   | 6   | --        | --  |
|            | Ca(ICC2/PI489777)SNP_06238 | 1648 | C | T | 5   | 5   | --        | --  |
|            | Ca(ICC2/PI489777)SNP_06239 | 1730 | C | T | 4   | 5   | --        | --  |
| CakTC39796 | Ca(ICC2/PI489777)SNP_06240 | 730  | A | G | 3   | 14  | Young_pod | --  |
|            | Ca(ICC2/PI489777)SNP_06241 | 850  | C | T | 3   | 11  | Young_pod | --  |
|            | Ca(ICC2/PI489777)SNP_06242 | 1148 | T | C | 4   | 6   | Young_pod | --  |
|            | Ca(ICC2/PI489777)SNP_06243 | 1160 | A | G | 3   | 6   | Young_pod | --  |
|            | Ca(ICC2/PI489777)SNP_06244 | 1333 | C | A | 3   | 6   | Young_pod | --  |
| CakTC33639 | Ca(ICC2/PI489777)SNP_06245 | 1574 | T | A | 5   | 4   | --        | --  |
|            | Ca(ICC2/PI489777)SNP_06246 | 1757 | C | T | 7   | 8   | --        | --  |
| CakTC39618 | Ca(ICC2/PI489777)SNP_06247 | 204  | T | G | 11  | 10  | --        | --  |
|            | Ca(ICC2/PI489777)SNP_06248 | 309  | G | C | 14  | 14  | --        | --  |
|            | Ca(ICC2/PI489777)SNP_06249 | 1118 | T | G | 8   | 4   | --        | --  |
| CakTC30698 | Ca(ICC2/PI489777)SNP_06250 | 668  | A | G | 22  | 19  | --        | --  |
| CakTC26559 | Ca(ICC2/PI489777)SNP_06251 | 1569 | T | C | 14  | 3   | Young_pod | --  |
| CakTC40645 | Ca(ICC2/PI489777)SNP_06252 | 1336 | T | C | 21  | 15  | --        | --  |
|            | Ca(ICC2/PI489777)SNP_06253 | 1477 | G | T | 13  | 11  | --        | --  |
|            | Ca(ICC2/PI489777)SNP_06254 | 1529 | G | T | 12  | 8   | --        | --  |
|            | Ca(ICC2/PI489777)SNP_06255 | 1811 | G | A | 10  | 9   | --        | --  |
| CakTC40209 | Ca(ICC2/PI489777)SNP_06256 | 31   | G | A | 3   | 4   | --        | --  |
|            | Ca(ICC2/PI489777)SNP_06257 | 109  | C | T | 6   | 15  | --        | --  |
|            | Ca(ICC2/PI489777)SNP_06258 | 782  | C | G | 56  | 40  | --        | --  |
|            | Ca(ICC2/PI489777)SNP_06259 | 793  | T | C | 56  | 46  | --        | --  |
|            | Ca(ICC2/PI489777)SNP_06260 | 1034 | G | A | 84  | 28  | --        | --  |
|            | Ca(ICC2/PI489777)SNP_06261 | 1077 | G | A | 65  | 28  | --        | --  |
|            | Ca(ICC2/PI489777)SNP_06262 | 1096 | A | T | 77  | 29  | --        | --  |
|            | Ca(ICC2/PI489777)SNP_06263 | 1097 | T | G | 76  | 30  | --        | --  |
| CakTC38882 | Ca(ICC2/PI489777)SNP_06264 | 60   | T | A | 12  | 7   | --        | --  |
|            | Ca(ICC2/PI489777)SNP_06265 | 451  | T | G | 23  | 16  | --        | --  |
|            | Ca(ICC2/PI489777)SNP_06266 | 470  | G | A | 23  | 16  | --        | --  |
|            | Ca(ICC2/PI489777)SNP_06267 | 571  | A | C | 18  | 18  | --        | --  |
|            | Ca(ICC2/PI489777)SNP_06268 | 765  | A | G | 50  | 34  | --        | --  |
|            | Ca(ICC2/PI489777)SNP_06269 | 947  | A | G | 59  | 37  | --        | --  |
|            | Ca(ICC2/PI489777)SNP_06270 | 948  | A | C | 57  | 38  | --        | --  |
|            | Ca(ICC2/PI489777)SNP_06271 | 1002 | G | C | 58  | 38  | --        | --  |
|            | Ca(ICC2/PI489777)SNP_06272 | 1196 | A | C | 37  | 10  | --        | --  |
|            | Ca(ICC2/PI489777)SNP_06273 | 1207 | A | G | 35  | 12  | --        | --  |
| CakTC37386 | Ca(ICC2/PI489777)SNP_06274 | 113  | C | T | 7   | 10  | --        | --  |
|            | Ca(ICC2/PI489777)SNP_06275 | 224  | C | T | 7   | 13  | --        | --  |
|            | Ca(ICC2/PI489777)SNP_06276 | 230  | T | C | 6   | 12  | --        | --  |
| CakTC26678 | Ca(ICC2/PI489777)SNP_06277 | 1291 | G | A | 97  | 39  | --        | --  |
|            | Ca(ICC2/PI489777)SNP_06278 | 1582 | G | A | 59  | 26  | --        | --  |
| CakTC24893 | Ca(ICC2/PI489777)SNP_06279 | 1288 | A | G | 24  | 7   | --        | --  |
|            | Ca(ICC2/PI489777)SNP_06280 | 1533 | G | A | 23  | 3   | --        | --  |
|            | Ca(ICC2/PI489777)SNP_06281 | 2205 | A | G | 11  | 6   | --        | --  |
| CakTC28263 | Ca(ICC2/PI489777)SNP_06282 | 547  | C | T | 3   | 5   | --        | --  |
|            | Ca(ICC2/PI489777)SNP_06283 | 549  | A | G | 4   | 5   | --        | --  |
|            | Ca(ICC2/PI489777)SNP_06284 | 3310 | A | T | 3   | 7   | --        | --  |
| CakTC39252 | Ca(ICC2/PI489777)SNP_06285 | 755  | T | C | 4   | 3   | --        | --  |

|            |                             |      |   |   |    |    |    |      |
|------------|-----------------------------|------|---|---|----|----|----|------|
| CakTC40252 | Ca(ICCV2/PI489777)SNP_06286 | 167  | T | C | 5  | 3  | -- | --   |
|            | Ca(ICCV2/PI489777)SNP_06287 | 229  | G | T | 14 | 6  | -- | --   |
|            | Ca(ICCV2/PI489777)SNP_06288 | 247  | G | A | 15 | 10 | -- | --   |
|            | Ca(ICCV2/PI489777)SNP_06289 | 264  | T | C | 15 | 10 | -- | --   |
|            | Ca(ICCV2/PI489777)SNP_06290 | 634  | T | G | 21 | 13 | -- | --   |
|            | Ca(ICCV2/PI489777)SNP_06291 | 640  | G | A | 22 | 13 | -- | --   |
|            | Ca(ICCV2/PI489777)SNP_06292 | 736  | A | G | 23 | 13 | -- | --   |
|            | Ca(ICCV2/PI489777)SNP_06293 | 877  | A | T | 21 | 13 | -- | --   |
|            | Ca(ICCV2/PI489777)SNP_06294 | 880  | A | T | 23 | 13 | -- | --   |
|            | Ca(ICCV2/PI489777)SNP_06295 | 1439 | G | T | 17 | 9  | -- | --   |
|            | Ca(ICCV2/PI489777)SNP_06296 | 1450 | T | C | 18 | 8  | -- | --   |
| CakTC39079 | Ca(ICCV2/PI489777)SNP_06297 | 1163 | T | C | 3  | 5  | -- | --   |
| CakTC19800 | Ca(ICCV2/PI489777)SNP_06298 | 655  | A | G | 26 | 25 | -- | --   |
|            | Ca(ICCV2/PI489777)SNP_06299 | 715  | G | A | 20 | 21 | -- | --   |
|            | Ca(ICCV2/PI489777)SNP_06300 | 722  | G | T | 16 | 22 | -- | --   |
|            | Ca(ICCV2/PI489777)SNP_06301 | 856  | G | C | 33 | 18 | -- | --   |
|            | Ca(ICCV2/PI489777)SNP_06302 | 882  | C | G | 37 | 22 | -- | --   |
|            | Ca(ICCV2/PI489777)SNP_06303 | 883  | A | T | 37 | 22 | -- | --   |
|            | Ca(ICCV2/PI489777)SNP_06304 | 1558 | A | G | 45 | 13 | -- | --   |
|            | Ca(ICCV2/PI489777)SNP_06305 | 1588 | C | T | 32 | 11 | -- | --   |
| CakTC40461 | Ca(ICCV2/PI489777)SNP_06306 | 430  | G | T | 10 | 18 | -- | GNAT |
|            | Ca(ICCV2/PI489777)SNP_06307 | 517  | A | G | 4  | 16 | -- | GNAT |
| CakTC34427 | Ca(ICCV2/PI489777)SNP_06308 | 726  | A | G | 33 | 14 | -- | GRAS |
|            | Ca(ICCV2/PI489777)SNP_06309 | 1071 | G | A | 13 | 11 | -- | GRAS |
|            | Ca(ICCV2/PI489777)SNP_06310 | 1422 | G | A | 18 | 13 | -- | GRAS |
|            | Ca(ICCV2/PI489777)SNP_06311 | 1434 | A | T | 17 | 13 | -- | GRAS |
|            | Ca(ICCV2/PI489777)SNP_06312 | 1933 | A | T | 12 | 13 | -- | GRAS |
| CakTC11487 | Ca(ICCV2/PI489777)SNP_06313 | 979  | T | C | 6  | 4  | -- | --   |
|            | Ca(ICCV2/PI489777)SNP_06314 | 1540 | G | A | 9  | 6  | -- | --   |
| CakTC33504 | Ca(ICCV2/PI489777)SNP_06315 | 451  | A | G | 6  | 10 | -- | --   |
| CakTC28587 | Ca(ICCV2/PI489777)SNP_06316 | 100  | T | C | 3  | 4  | -- | --   |
|            | Ca(ICCV2/PI489777)SNP_06317 | 301  | T | C | 9  | 5  | -- | --   |
|            | Ca(ICCV2/PI489777)SNP_06318 | 363  | C | T | 10 | 6  | -- | --   |
|            | Ca(ICCV2/PI489777)SNP_06319 | 595  | G | A | 11 | 6  | -- | --   |
|            | Ca(ICCV2/PI489777)SNP_06320 | 845  | C | G | 9  | 12 | -- | --   |
|            | Ca(ICCV2/PI489777)SNP_06321 | 1219 | T | G | 11 | 13 | -- | --   |
|            | Ca(ICCV2/PI489777)SNP_06322 | 1552 | G | A | 19 | 17 | -- | --   |
|            | Ca(ICCV2/PI489777)SNP_06323 | 1762 | A | G | 5  | 7  | -- | --   |
|            | Ca(ICCV2/PI489777)SNP_06324 | 1829 | G | T | 5  | 5  | -- | --   |
|            | Ca(ICCV2/PI489777)SNP_06325 | 1834 | G | C | 6  | 6  | -- | --   |
| CakTC25311 | Ca(ICCV2/PI489777)SNP_06326 | 718  | A | G | 41 | 16 | -- | --   |
| CakTC23478 | Ca(ICCV2/PI489777)SNP_06327 | 238  | A | G | 17 | 18 | -- | --   |
|            | Ca(ICCV2/PI489777)SNP_06328 | 325  | T | C | 30 | 27 | -- | --   |
|            | Ca(ICCV2/PI489777)SNP_06329 | 1693 | T | C | 27 | 21 | -- | --   |
|            | Ca(ICCV2/PI489777)SNP_06330 | 1843 | A | G | 17 | 11 | -- | --   |
|            | Ca(ICCV2/PI489777)SNP_06331 | 1867 | G | A | 23 | 14 | -- | --   |
|            | Ca(ICCV2/PI489777)SNP_06332 | 1960 | G | A | 25 | 18 | -- | --   |
|            | Ca(ICCV2/PI489777)SNP_06333 | 2107 | A | G | 15 | 21 | -- | --   |
| CakTC25181 | Ca(ICCV2/PI489777)SNP_06334 | 103  | C | A | 6  | 8  | -- | --   |
|            | Ca(ICCV2/PI489777)SNP_06335 | 830  | T | G | 32 | 14 | -- | --   |
| CakTC17813 | Ca(ICCV2/PI489777)SNP_06336 | 752  | T | C | 3  | 4  | -- | --   |
| CakTC33970 | Ca(ICCV2/PI489777)SNP_06337 | 421  | C | T | 9  | 3  | -- | --   |
|            | Ca(ICCV2/PI489777)SNP_06338 | 422  | A | C | 8  | 3  | -- | --   |
|            | Ca(ICCV2/PI489777)SNP_06339 | 699  | G | A | 6  | 4  | -- | --   |
|            | Ca(ICCV2/PI489777)SNP_06340 | 732  | C | T | 5  | 4  | -- | --   |
|            | Ca(ICCV2/PI489777)SNP_06341 | 996  | T | A | 9  | 4  | -- | --   |
|            | Ca(ICCV2/PI489777)SNP_06342 | 1137 | T | C | 10 | 4  | -- | --   |
|            | Ca(ICCV2/PI489777)SNP_06343 | 1407 | A | G | 13 | 9  | -- | --   |
|            | Ca(ICCV2/PI489777)SNP_06344 | 1818 | T | C | 8  | 4  | -- | --   |
| CakTC42829 | Ca(ICCV2/PI489777)SNP_06345 | 713  | T | C | 62 | 19 | -- | --   |
| CakTC28013 | Ca(ICCV2/PI489777)SNP_06346 | 67   | A | G | 3  | 7  | -- | --   |
|            | Ca(ICCV2/PI489777)SNP_06347 | 93   | C | T | 4  | 6  | -- | --   |
|            | Ca(ICCV2/PI489777)SNP_06348 | 966  | T | C | 7  | 6  | -- | --   |
|            | Ca(ICCV2/PI489777)SNP_06349 | 972  | A | T | 7  | 6  | -- | --   |
| CakTC28568 | Ca(ICCV2/PI489777)SNP_06350 | 389  | T | C | 42 | 22 | -- | --   |
|            | Ca(ICCV2/PI489777)SNP_06351 | 503  | A | C | 39 | 25 | -- | --   |
|            | Ca(ICCV2/PI489777)SNP_06352 | 803  | T | C | 34 | 18 | -- | --   |
|            | Ca(ICCV2/PI489777)SNP_06353 | 1088 | G | T | 35 | 27 | -- | --   |
|            | Ca(ICCV2/PI489777)SNP_06354 | 1985 | A | G | 17 | 20 | -- | --   |
| CakTC24242 | Ca(ICCV2/PI489777)SNP_06355 | 332  | T | G | 14 | 3  | -- | --   |
|            | Ca(ICCV2/PI489777)SNP_06356 | 368  | T | C | 16 | 3  | -- | --   |
|            | Ca(ICCV2/PI489777)SNP_06357 | 1535 | C | T | 15 | 5  | -- | --   |
|            | Ca(ICCV2/PI489777)SNP_06358 | 1594 | G | T | 20 | 5  | -- | --   |
|            | Ca(ICCV2/PI489777)SNP_06359 | 2510 | G | C | 19 | 3  | -- | --   |

|            |                            |      |   |   |    |    |    |          |
|------------|----------------------------|------|---|---|----|----|----|----------|
|            | Ca(ICC2/PI489777)SNP_06360 | 2535 | A | G | 18 | 3  | -- | --       |
|            | Ca(ICC2/PI489777)SNP_06361 | 2653 | G | C | 12 | 3  | -- | --       |
| CakTC36530 | Ca(ICC2/PI489777)SNP_06362 | 785  | T | C | 4  | 4  | -- | --       |
|            | Ca(ICC2/PI489777)SNP_06363 | 1456 | G | A | 15 | 13 | -- | --       |
|            | Ca(ICC2/PI489777)SNP_06364 | 1511 | T | C | 8  | 12 | -- | --       |
|            | Ca(ICC2/PI489777)SNP_06365 | 2088 | G | A | 6  | 4  | -- | --       |
|            | Ca(ICC2/PI489777)SNP_06366 | 2455 | T | A | 10 | 3  | -- | --       |
| CakTC34644 | Ca(ICC2/PI489777)SNP_06367 | 1899 | T | C | 26 | 12 | -- | --       |
|            | Ca(ICC2/PI489777)SNP_06368 | 1982 | G | A | 24 | 10 | -- | --       |
| CakTC11780 | Ca(ICC2/PI489777)SNP_06369 | 271  | T | C | 5  | 9  | -- | --       |
| CakTC41237 | Ca(ICC2/PI489777)SNP_06370 | 832  | C | T | 15 | 3  | -- | --       |
|            | Ca(ICC2/PI489777)SNP_06371 | 1006 | A | C | 22 | 5  | -- | --       |
|            | Ca(ICC2/PI489777)SNP_06372 | 1209 | G | T | 12 | 3  | -- | --       |
|            | Ca(ICC2/PI489777)SNP_06373 | 1262 | C | T | 12 | 3  | -- | --       |
|            | Ca(ICC2/PI489777)SNP_06374 | 1381 | A | C | 17 | 4  | -- | --       |
|            | Ca(ICC2/PI489777)SNP_06375 | 1529 | T | C | 12 | 7  | -- | --       |
|            | Ca(ICC2/PI489777)SNP_06376 | 1754 | C | T | 12 | 10 | -- | --       |
| CakTC34348 | Ca(ICC2/PI489777)SNP_06377 | 680  | A | T | 7  | 12 | -- | --       |
|            | Ca(ICC2/PI489777)SNP_06378 | 757  | A | G | 5  | 12 | -- | --       |
|            | Ca(ICC2/PI489777)SNP_06379 | 816  | C | T | 5  | 9  | -- | --       |
| CakTC37338 | Ca(ICC2/PI489777)SNP_06380 | 1122 | A | G | 13 | 6  | -- | --       |
| CakTC12579 | Ca(ICC2/PI489777)SNP_06381 | 284  | A | G | 4  | 4  | -- | --       |
| CakTC36877 | Ca(ICC2/PI489777)SNP_06382 | 213  | C | G | 19 | 6  | -- | --       |
|            | Ca(ICC2/PI489777)SNP_06383 | 227  | C | T | 20 | 6  | -- | --       |
| CakTC32041 | Ca(ICC2/PI489777)SNP_06384 | 130  | A | C | 7  | 3  | -- | --       |
|            | Ca(ICC2/PI489777)SNP_06385 | 221  | C | T | 7  | 3  | -- | --       |
|            | Ca(ICC2/PI489777)SNP_06386 | 285  | A | C | 8  | 3  | -- | --       |
|            | Ca(ICC2/PI489777)SNP_06387 | 5623 | C | T | 8  | 3  | -- | --       |
| CakTC29263 | Ca(ICC2/PI489777)SNP_06388 | 1845 | C | G | 11 | 5  | -- | C2C2-Dof |
|            | Ca(ICC2/PI489777)SNP_06389 | 2034 | T | C | 10 | 6  | -- | C2C2-Dof |
| CakTC27879 | Ca(ICC2/PI489777)SNP_06390 | 1698 | G | C | 29 | 17 | -- | --       |
| CakTC32947 | Ca(ICC2/PI489777)SNP_06391 | 348  | A | G | 8  | 5  | -- | --       |
|            | Ca(ICC2/PI489777)SNP_06392 | 360  | C | T | 9  | 5  | -- | --       |
|            | Ca(ICC2/PI489777)SNP_06393 | 537  | G | A | 3  | 5  | -- | --       |
|            | Ca(ICC2/PI489777)SNP_06394 | 546  | G | A | 4  | 5  | -- | --       |
|            | Ca(ICC2/PI489777)SNP_06395 | 2635 | G | A | 8  | 8  | -- | --       |
| CakTC09609 | Ca(ICC2/PI489777)SNP_06396 | 1213 | A | T | 3  | 3  | -- | E2F-DP   |
| CakTC41071 | Ca(ICC2/PI489777)SNP_06397 | 249  | T | C | 4  | 4  | -- | --       |
| CakTC39870 | Ca(ICC2/PI489777)SNP_06398 | 577  | G | A | 51 | 21 | -- | --       |
|            | Ca(ICC2/PI489777)SNP_06399 | 1159 | C | G | 27 | 7  | -- | --       |
|            | Ca(ICC2/PI489777)SNP_06400 | 1168 | G | C | 25 | 7  | -- | --       |
|            | Ca(ICC2/PI489777)SNP_06401 | 1187 | T | C | 17 | 6  | -- | --       |
|            | Ca(ICC2/PI489777)SNP_06402 | 1192 | A | G | 19 | 6  | -- | --       |
|            | Ca(ICC2/PI489777)SNP_06403 | 1213 | T | A | 11 | 6  | -- | --       |
|            | Ca(ICC2/PI489777)SNP_06404 | 1214 | G | A | 16 | 6  | -- | --       |
| CakTC26922 | Ca(ICC2/PI489777)SNP_06405 | 1250 | A | C | 4  | 4  | -- | --       |
|            | Ca(ICC2/PI489777)SNP_06406 | 2369 | A | C | 7  | 6  | -- | --       |
|            | Ca(ICC2/PI489777)SNP_06407 | 2917 | C | A | 10 | 4  | -- | --       |
|            | Ca(ICC2/PI489777)SNP_06408 | 2992 | T | G | 5  | 4  | -- | --       |
| CakTC10014 | Ca(ICC2/PI489777)SNP_06409 | 223  | T | A | 5  | 6  | -- | --       |
|            | Ca(ICC2/PI489777)SNP_06410 | 282  | A | T | 5  | 8  | -- | --       |
|            | Ca(ICC2/PI489777)SNP_06411 | 415  | T | C | 6  | 10 | -- | --       |
|            | Ca(ICC2/PI489777)SNP_06412 | 429  | T | G | 4  | 10 | -- | --       |
|            | Ca(ICC2/PI489777)SNP_06413 | 588  | A | G | 4  | 11 | -- | --       |
|            | Ca(ICC2/PI489777)SNP_06414 | 726  | A | C | 4  | 4  | -- | --       |
| CakTC26385 | Ca(ICC2/PI489777)SNP_06415 | 472  | T | C | 28 | 11 | -- | --       |
|            | Ca(ICC2/PI489777)SNP_06416 | 713  | G | A | 27 | 6  | -- | --       |
|            | Ca(ICC2/PI489777)SNP_06417 | 736  | A | G | 27 | 6  | -- | --       |
|            | Ca(ICC2/PI489777)SNP_06418 | 794  | T | C | 25 | 5  | -- | --       |
|            | Ca(ICC2/PI489777)SNP_06419 | 939  | T | C | 23 | 4  | -- | --       |
|            | Ca(ICC2/PI489777)SNP_06420 | 985  | C | T | 18 | 3  | -- | --       |
|            | Ca(ICC2/PI489777)SNP_06421 | 1002 | T | C | 21 | 4  | -- | --       |
|            | Ca(ICC2/PI489777)SNP_06422 | 1006 | A | C | 20 | 3  | -- | --       |
|            | Ca(ICC2/PI489777)SNP_06423 | 1014 | C | T | 17 | 4  | -- | --       |
| CakTC28622 | Ca(ICC2/PI489777)SNP_06424 | 3108 | G | C | 5  | 3  | -- | --       |
| CakTC38796 | Ca(ICC2/PI489777)SNP_06425 | 230  | T | G | 21 | 4  | -- | --       |
|            | Ca(ICC2/PI489777)SNP_06426 | 254  | G | A | 21 | 4  | -- | --       |
|            | Ca(ICC2/PI489777)SNP_06427 | 353  | A | G | 28 | 6  | -- | --       |
|            | Ca(ICC2/PI489777)SNP_06428 | 1037 | G | A | 35 | 10 | -- | --       |
|            | Ca(ICC2/PI489777)SNP_06429 | 1094 | C | T | 27 | 9  | -- | --       |
|            | Ca(ICC2/PI489777)SNP_06430 | 1173 | T | G | 20 | 6  | -- | --       |
|            | Ca(ICC2/PI489777)SNP_06431 | 1175 | G | C | 20 | 6  | -- | --       |
|            | Ca(ICC2/PI489777)SNP_06432 | 1214 | A | C | 18 | 5  | -- | --       |
| CakTC31658 | Ca(ICC2/PI489777)SNP_06433 | 288  | A | T | 7  | 4  | -- | --       |

|            |                            |      |   |   |     |    |           |             |
|------------|----------------------------|------|---|---|-----|----|-----------|-------------|
| CakTC32245 | Ca(ICC2/PI489777)SNP_06434 | 1304 | C | T | 28  | 37 | --        | --          |
|            | Ca(ICC2/PI489777)SNP_06435 | 1353 | G | C | 13  | 28 | --        | --          |
| CakTC26629 | Ca(ICC2/PI489777)SNP_06436 | 1716 | C | T | 4   | 4  | --        | --          |
|            | Ca(ICC2/PI489777)SNP_06437 | 1729 | C | T | 4   | 3  | --        | --          |
|            | Ca(ICC2/PI489777)SNP_06438 | 1734 | G | A | 3   | 3  | --        | --          |
| CakTC39773 | Ca(ICC2/PI489777)SNP_06439 | 194  | G | A | 7   | 4  | --        | --          |
|            | Ca(ICC2/PI489777)SNP_06440 | 336  | T | G | 9   | 3  | --        | --          |
|            | Ca(ICC2/PI489777)SNP_06441 | 455  | G | A | 7   | 4  | --        | --          |
|            | Ca(ICC2/PI489777)SNP_06442 | 914  | T | A | 9   | 5  | --        | --          |
| CakTC37617 | Ca(ICC2/PI489777)SNP_06443 | 809  | C | A | 5   | 3  | --        | --          |
| CakTC26275 | Ca(ICC2/PI489777)SNP_06444 | 146  | C | A | 17  | 12 | --        | --          |
|            | Ca(ICC2/PI489777)SNP_06445 | 421  | A | G | 8   | 8  | --        | --          |
|            | Ca(ICC2/PI489777)SNP_06446 | 422  | C | A | 9   | 8  | --        | --          |
| CakTC43227 | Ca(ICC2/PI489777)SNP_06447 | 306  | A | G | 8   | 7  | --        | --          |
| CakTC28733 | Ca(ICC2/PI489777)SNP_06448 | 154  | C | T | 13  | 4  | --        | --          |
|            | Ca(ICC2/PI489777)SNP_06449 | 211  | T | A | 11  | 4  | --        | --          |
| CakTC39862 | Ca(ICC2/PI489777)SNP_06450 | 545  | A | G | 5   | 3  | --        | --          |
|            | Ca(ICC2/PI489777)SNP_06451 | 885  | T | C | 7   | 10 | --        | --          |
| CakTC24591 | Ca(ICC2/PI489777)SNP_06452 | 904  | A | T | 47  | 16 | Flower    | bud         |
|            | Ca(ICC2/PI489777)SNP_06453 | 952  | C | A | 50  | 13 | Flower    | bud         |
|            | Ca(ICC2/PI489777)SNP_06454 | 1104 | C | T | 58  | 12 | Flower    | bud         |
|            | Ca(ICC2/PI489777)SNP_06455 | 1869 | C | G | 13  | 7  | Flower    | bud         |
| CakTC33174 | Ca(ICC2/PI489777)SNP_06456 | 376  | T | A | 19  | 6  | --        | --          |
| CakTC38338 | Ca(ICC2/PI489777)SNP_06457 | 1532 | T | C | 4   | 6  | Young_pod | LIM         |
|            | Ca(ICC2/PI489777)SNP_06458 | 1669 | C | G | 7   | 4  | Young_pod | LIM         |
|            | Ca(ICC2/PI489777)SNP_06459 | 1699 | T | G | 6   | 4  | Young_pod | LIM         |
| CakTC39811 | Ca(ICC2/PI489777)SNP_06460 | 1109 | A | C | 15  | 13 | --        | --          |
|            | Ca(ICC2/PI489777)SNP_06461 | 1161 | G | T | 13  | 9  | --        | --          |
| CakTC38539 | Ca(ICC2/PI489777)SNP_06462 | 630  | A | G | 23  | 17 | --        | --          |
|            | Ca(ICC2/PI489777)SNP_06463 | 765  | G | A | 19  | 16 | --        | --          |
|            | Ca(ICC2/PI489777)SNP_06464 | 1530 | A | G | 11  | 6  | --        | --          |
| CakTC30279 | Ca(ICC2/PI489777)SNP_06465 | 1253 | A | G | 9   | 3  | --        | --          |
|            | Ca(ICC2/PI489777)SNP_06466 | 1403 | T | C | 14  | 4  | --        | --          |
|            | Ca(ICC2/PI489777)SNP_06467 | 1748 | C | T | 3   | 7  | --        | --          |
| CakTC25071 | Ca(ICC2/PI489777)SNP_06468 | 827  | A | G | 11  | 9  | --        | --          |
|            | Ca(ICC2/PI489777)SNP_06469 | 989  | T | A | 13  | 7  | --        | --          |
|            | Ca(ICC2/PI489777)SNP_06470 | 992  | C | T | 13  | 6  | --        | --          |
|            | Ca(ICC2/PI489777)SNP_06471 | 1090 | T | C | 12  | 3  | --        | --          |
| CakTC23617 | Ca(ICC2/PI489777)SNP_06472 | 408  | C | G | 9   | 4  | --        | --          |
|            | Ca(ICC2/PI489777)SNP_06473 | 413  | G | A | 9   | 3  | --        | --          |
|            | Ca(ICC2/PI489777)SNP_06474 | 526  | G | C | 4   | 4  | --        | --          |
|            | Ca(ICC2/PI489777)SNP_06475 | 559  | A | T | 4   | 4  | --        | --          |
| CakTC27872 | Ca(ICC2/PI489777)SNP_06476 | 432  | A | T | 69  | 48 | --        | --          |
|            | Ca(ICC2/PI489777)SNP_06477 | 534  | G | A | 56  | 33 | --        | --          |
| CakTC23709 | Ca(ICC2/PI489777)SNP_06478 | 133  | C | A | 9   | 8  | --        | --          |
|            | Ca(ICC2/PI489777)SNP_06479 | 842  | T | G | 8   | 5  | --        | --          |
| CakTC25340 | Ca(ICC2/PI489777)SNP_06480 | 1209 | A | G | 3   | 3  | --        | --          |
| CakTC24946 | Ca(ICC2/PI489777)SNP_06481 | 481  | C | G | 17  | 6  | --        | --          |
|            | Ca(ICC2/PI489777)SNP_06482 | 826  | T | G | 19  | 3  | --        | --          |
|            | Ca(ICC2/PI489777)SNP_06483 | 1194 | A | T | 7   | 6  | --        | --          |
|            | Ca(ICC2/PI489777)SNP_06484 | 1276 | T | C | 3   | 3  | --        | --          |
| CakTC29372 | Ca(ICC2/PI489777)SNP_06485 | 13   | T | A | 6   | 12 | --        | --          |
|            | Ca(ICC2/PI489777)SNP_06486 | 457  | G | A | 20  | 61 | --        | --          |
|            | Ca(ICC2/PI489777)SNP_06487 | 720  | T | A | 20  | 52 | --        | --          |
|            | Ca(ICC2/PI489777)SNP_06488 | 1033 | G | T | 16  | 54 | --        | --          |
|            | Ca(ICC2/PI489777)SNP_06489 | 1339 | A | T | 4   | 16 | --        | --          |
| CakTC25144 | Ca(ICC2/PI489777)SNP_06490 | 127  | A | T | 12  | 4  | --        | --          |
|            | Ca(ICC2/PI489777)SNP_06491 | 221  | G | A | 14  | 4  | --        | --          |
|            | Ca(ICC2/PI489777)SNP_06492 | 679  | T | C | 16  | 4  | --        | --          |
|            | Ca(ICC2/PI489777)SNP_06493 | 718  | G | A | 14  | 4  | --        | --          |
|            | Ca(ICC2/PI489777)SNP_06494 | 730  | G | T | 13  | 4  | --        | --          |
|            | Ca(ICC2/PI489777)SNP_06495 | 818  | A | G | 10  | 4  | --        | --          |
| CakTC33277 | Ca(ICC2/PI489777)SNP_06496 | 493  | A | G | 166 | 7  | --        | --          |
| CakTC34630 | Ca(ICC2/PI489777)SNP_06497 | 485  | G | A | 51  | 9  | --        | --          |
| CakTC05841 | Ca(ICC2/PI489777)SNP_06498 | 909  | C | T | 7   | 5  | --        | --          |
|            | Ca(ICC2/PI489777)SNP_06499 | 1271 | G | A | 5   | 6  | --        | --          |
| CakTC09819 | Ca(ICC2/PI489777)SNP_06500 | 2272 | A | T | 7   | 6  | --        | --          |
|            | Ca(ICC2/PI489777)SNP_06501 | 2327 | T | C | 3   | 7  | --        | --          |
| CakTC42969 | Ca(ICC2/PI489777)SNP_06502 | 219  | A | T | 3   | 5  | --        | --          |
|            | Ca(ICC2/PI489777)SNP_06503 | 247  | C | T | 3   | 5  | --        | --          |
|            | Ca(ICC2/PI489777)SNP_06504 | 283  | C | A | 3   | 5  | --        | --          |
|            | Ca(ICC2/PI489777)SNP_06505 | 355  | C | T | 8   | 4  | --        | --          |
| CakTC29953 | Ca(ICC2/PI489777)SNP_06506 | 3151 | C | G | 3   | 8  | --        | Bromodomain |
|            | Ca(ICC2/PI489777)SNP_06507 | 3224 | A | G | 4   | 5  | --        | Bromodomain |



|            |                             |      |   |   |    |    |    |             |
|------------|-----------------------------|------|---|---|----|----|----|-------------|
|            | Ca(ICCV2/PI489777)SNP_06508 | 5354 | A | C | 6  | 4  | -- | Bromodomain |
| CakTC11755 | Ca(ICCV2/PI489777)SNP_06509 | 1186 | A | T | 7  | 6  | -- | --          |
| CakTC26354 | Ca(ICCV2/PI489777)SNP_06510 | 200  | T | C | 10 | 3  | -- | --          |
|            | Ca(ICCV2/PI489777)SNP_06511 | 245  | G | A | 10 | 3  | -- | --          |
|            | Ca(ICCV2/PI489777)SNP_06512 | 329  | A | T | 11 | 3  | -- | --          |
|            | Ca(ICCV2/PI489777)SNP_06513 | 860  | G | A | 13 | 3  | -- | --          |
|            | Ca(ICCV2/PI489777)SNP_06514 | 876  | G | C | 13 | 3  | -- | --          |
|            | Ca(ICCV2/PI489777)SNP_06515 | 882  | A | T | 13 | 3  | -- | --          |
|            | Ca(ICCV2/PI489777)SNP_06516 | 891  | A | C | 14 | 3  | -- | --          |
|            | Ca(ICCV2/PI489777)SNP_06517 | 917  | C | T | 10 | 3  | -- | --          |
| CakTC22395 | Ca(ICCV2/PI489777)SNP_06518 | 2334 | T | C | 3  | 3  | -- | --          |
| CakTC37728 | Ca(ICCV2/PI489777)SNP_06519 | 211  | A | C | 17 | 12 | -- | --          |
| CakTC27056 | Ca(ICCV2/PI489777)SNP_06520 | 1426 | G | A | 7  | 3  | -- | --          |
| CakTC25222 | Ca(ICCV2/PI489777)SNP_06521 | 618  | T | C | 61 | 33 | -- | --          |
|            | Ca(ICCV2/PI489777)SNP_06522 | 951  | C | T | 47 | 36 | -- | --          |
| CakTC39807 | Ca(ICCV2/PI489777)SNP_06523 | 253  | T | C | 22 | 5  | -- | --          |
|            | Ca(ICCV2/PI489777)SNP_06524 | 736  | G | A | 10 | 5  | -- | --          |
|            | Ca(ICCV2/PI489777)SNP_06525 | 876  | A | G | 22 | 6  | -- | --          |
|            | Ca(ICCV2/PI489777)SNP_06526 | 1107 | G | A | 18 | 9  | -- | --          |
|            | Ca(ICCV2/PI489777)SNP_06527 | 1162 | T | A | 17 | 8  | -- | --          |
| CakTC30289 | Ca(ICCV2/PI489777)SNP_06528 | 855  | T | C | 4  | 5  | -- | --          |
| CakTC38740 | Ca(ICCV2/PI489777)SNP_06529 | 762  | G | T | 60 | 28 | -- | --          |
|            | Ca(ICCV2/PI489777)SNP_06530 | 898  | A | G | 40 | 20 | -- | --          |
| CakTC26475 | Ca(ICCV2/PI489777)SNP_06531 | 1105 | T | C | 5  | 3  | -- | --          |
|            | Ca(ICCV2/PI489777)SNP_06532 | 1570 | G | A | 4  | 3  | -- | --          |
|            | Ca(ICCV2/PI489777)SNP_06533 | 2895 | A | G | 3  | 7  | -- | --          |
| CakTC07064 | Ca(ICCV2/PI489777)SNP_06534 | 984  | T | C | 3  | 4  | -- | --          |
| CakTC37098 | Ca(ICCV2/PI489777)SNP_06535 | 627  | G | A | 11 | 4  | -- | MYB-related |
|            | Ca(ICCV2/PI489777)SNP_06536 | 992  | T | C | 14 | 9  | -- | MYB-related |
|            | Ca(ICCV2/PI489777)SNP_06537 | 1006 | G | C | 13 | 8  | -- | MYB-related |
|            | Ca(ICCV2/PI489777)SNP_06538 | 1163 | G | A | 7  | 6  | -- | MYB-related |
|            | Ca(ICCV2/PI489777)SNP_06539 | 1190 | T | G | 6  | 7  | -- | MYB-related |
|            | Ca(ICCV2/PI489777)SNP_06540 | 1760 | T | A | 5  | 10 | -- | MYB-related |
|            | Ca(ICCV2/PI489777)SNP_06541 | 2490 | G | A | 8  | 7  | -- | MYB-related |
| CakTC33331 | Ca(ICCV2/PI489777)SNP_06542 | 3619 | T | C | 10 | 9  | -- | --          |
| CakTC26630 | Ca(ICCV2/PI489777)SNP_06543 | 63   | T | C | 6  | 6  | -- | --          |
|            | Ca(ICCV2/PI489777)SNP_06544 | 98   | A | T | 11 | 8  | -- | --          |
|            | Ca(ICCV2/PI489777)SNP_06545 | 149  | A | G | 14 | 10 | -- | --          |
|            | Ca(ICCV2/PI489777)SNP_06546 | 1178 | A | G | 48 | 36 | -- | --          |
|            | Ca(ICCV2/PI489777)SNP_06547 | 1349 | G | A | 35 | 27 | -- | --          |
|            | Ca(ICCV2/PI489777)SNP_06548 | 1365 | T | C | 38 | 40 | -- | --          |
|            | Ca(ICCV2/PI489777)SNP_06549 | 1397 | C | T | 37 | 38 | -- | --          |
|            | Ca(ICCV2/PI489777)SNP_06550 | 1438 | T | A | 32 | 33 | -- | --          |
|            | Ca(ICCV2/PI489777)SNP_06551 | 1448 | C | T | 33 | 35 | -- | --          |
|            | Ca(ICCV2/PI489777)SNP_06552 | 1451 | G | T | 35 | 36 | -- | --          |
| CakTC32626 | Ca(ICCV2/PI489777)SNP_06553 | 2023 | T | C | 29 | 27 | -- | --          |
|            | Ca(ICCV2/PI489777)SNP_06554 | 3069 | C | T | 50 | 15 | -- | --          |
|            | Ca(ICCV2/PI489777)SNP_06555 | 3146 | A | G | 49 | 19 | -- | --          |
|            | Ca(ICCV2/PI489777)SNP_06556 | 5914 | A | C | 40 | 32 | -- | --          |
| CakTC37189 | Ca(ICCV2/PI489777)SNP_06557 | 596  | G | A | 6  | 5  | -- | --          |
| CakTC33240 | Ca(ICCV2/PI489777)SNP_06558 | 827  | T | G | 69 | 35 | -- | --          |
|            | Ca(ICCV2/PI489777)SNP_06559 | 875  | G | A | 60 | 37 | -- | --          |
|            | Ca(ICCV2/PI489777)SNP_06560 | 1406 | G | C | 41 | 32 | -- | --          |
| CakTC43128 | Ca(ICCV2/PI489777)SNP_06561 | 746  | T | C | 59 | 37 | -- | --          |
| CakTC38765 | Ca(ICCV2/PI489777)SNP_06562 | 2839 | G | A | 5  | 3  | -- | --          |
|            | Ca(ICCV2/PI489777)SNP_06563 | 2916 | C | T | 4  | 3  | -- | --          |
| CakTC28964 | Ca(ICCV2/PI489777)SNP_06564 | 1551 | G | T | 5  | 7  | -- | --          |
|            | Ca(ICCV2/PI489777)SNP_06565 | 1763 | A | G | 5  | 6  | -- | --          |
| CakTC42123 | Ca(ICCV2/PI489777)SNP_06566 | 378  | A | T | 5  | 5  | -- | --          |
|            | Ca(ICCV2/PI489777)SNP_06567 | 404  | C | G | 5  | 5  | -- | --          |
| CakTC42498 | Ca(ICCV2/PI489777)SNP_06568 | 687  | T | C | 5  | 4  | -- | AP2-EREBP   |
| CakTC22710 | Ca(ICCV2/PI489777)SNP_06569 | 598  | T | C | 4  | 10 | -- | --          |
|            | Ca(ICCV2/PI489777)SNP_06570 | 603  | T | C | 4  | 10 | -- | --          |
|            | Ca(ICCV2/PI489777)SNP_06571 | 790  | A | G | 12 | 8  | -- | --          |
| CakTC37926 | Ca(ICCV2/PI489777)SNP_06572 | 284  | A | G | 3  | 3  | -- | --          |
|            | Ca(ICCV2/PI489777)SNP_06573 | 285  | C | T | 3  | 3  | -- | --          |
|            | Ca(ICCV2/PI489777)SNP_06574 | 307  | A | G | 3  | 3  | -- | --          |
|            | Ca(ICCV2/PI489777)SNP_06575 | 330  | T | C | 4  | 3  | -- | --          |
| CakTC26058 | Ca(ICCV2/PI489777)SNP_06576 | 78   | G | A | 18 | 5  | -- | --          |
|            | Ca(ICCV2/PI489777)SNP_06577 | 141  | G | A | 24 | 6  | -- | --          |
|            | Ca(ICCV2/PI489777)SNP_06578 | 323  | T | C | 18 | 7  | -- | --          |
|            | Ca(ICCV2/PI489777)SNP_06579 | 351  | A | G | 19 | 5  | -- | --          |
|            | Ca(ICCV2/PI489777)SNP_06580 | 354  | C | T | 20 | 5  | -- | --          |
| CakTC29510 | Ca(ICCV2/PI489777)SNP_06581 | 639  | A | G | 4  | 3  | -- | NAC         |

|            |                             |      |   |   |     |     |    |      |
|------------|-----------------------------|------|---|---|-----|-----|----|------|
| CakTC28509 | Ca(ICCV2/PI489777)SNP_06582 | 1142 | G | A | 6   | 7   | -- | --   |
| CakTC41411 | Ca(ICCV2/PI489777)SNP_06583 | 273  | C | A | 33  | 8   | -- | --   |
|            | Ca(ICCV2/PI489777)SNP_06584 | 397  | T | C | 36  | 14  | -- | --   |
|            | Ca(ICCV2/PI489777)SNP_06585 | 585  | A | T | 27  | 14  | -- | --   |
|            | Ca(ICCV2/PI489777)SNP_06586 | 1038 | A | G | 16  | 8   | -- | --   |
|            | Ca(ICCV2/PI489777)SNP_06587 | 1850 | G | A | 13  | 5   | -- | --   |
|            | Ca(ICCV2/PI489777)SNP_06588 | 1865 | C | T | 13  | 5   | -- | --   |
|            | Ca(ICCV2/PI489777)SNP_06589 | 2037 | C | T | 16  | 12  | -- | --   |
|            | Ca(ICCV2/PI489777)SNP_06590 | 2219 | C | G | 22  | 18  | -- | --   |
| CakTC30926 | Ca(ICCV2/PI489777)SNP_06591 | 1979 | A | T | 6   | 4   | -- | --   |
| CakTC26554 | Ca(ICCV2/PI489777)SNP_06592 | 628  | A | G | 3   | 3   | -- | --   |
| CakTC26936 | Ca(ICCV2/PI489777)SNP_06593 | 93   | C | T | 11  | 12  | -- | --   |
|            | Ca(ICCV2/PI489777)SNP_06594 | 309  | C | G | 29  | 11  | -- | --   |
|            | Ca(ICCV2/PI489777)SNP_06595 | 399  | T | G | 29  | 10  | -- | --   |
| CakTC33446 | Ca(ICCV2/PI489777)SNP_06596 | 509  | C | T | 4   | 7   | -- | --   |
|            | Ca(ICCV2/PI489777)SNP_06597 | 536  | G | A | 4   | 7   | -- | --   |
| CakTC40514 | Ca(ICCV2/PI489777)SNP_06598 | 762  | T | A | 48  | 14  | -- | --   |
|            | Ca(ICCV2/PI489777)SNP_06599 | 828  | T | C | 46  | 14  | -- | --   |
| CakTC39567 | Ca(ICCV2/PI489777)SNP_06600 | 197  | A | G | 5   | 16  | -- | --   |
|            | Ca(ICCV2/PI489777)SNP_06601 | 210  | G | T | 3   | 19  | -- | --   |
|            | Ca(ICCV2/PI489777)SNP_06602 | 734  | T | A | 15  | 3   | -- | --   |
| CakTC36576 | Ca(ICCV2/PI489777)SNP_06603 | 437  | T | C | 16  | 6   | -- | --   |
|            | Ca(ICCV2/PI489777)SNP_06604 | 1121 | C | T | 14  | 9   | -- | --   |
|            | Ca(ICCV2/PI489777)SNP_06605 | 1222 | G | T | 18  | 4   | -- | --   |
|            | Ca(ICCV2/PI489777)SNP_06606 | 1626 | T | C | 27  | 11  | -- | --   |
|            | Ca(ICCV2/PI489777)SNP_06607 | 2085 | T | C | 9   | 6   | -- | --   |
|            | Ca(ICCV2/PI489777)SNP_06608 | 2154 | C | G | 7   | 3   | -- | --   |
|            | Ca(ICCV2/PI489777)SNP_06609 | 2235 | G | A | 9   | 5   | -- | --   |
|            | Ca(ICCV2/PI489777)SNP_06610 | 2343 | A | G | 11  | 8   | -- | --   |
|            | Ca(ICCV2/PI489777)SNP_06611 | 2636 | G | A | 7   | 7   | -- | --   |
| CakTC41938 | Ca(ICCV2/PI489777)SNP_06612 | 45   | C | A | 10  | 12  | -- | --   |
|            | Ca(ICCV2/PI489777)SNP_06613 | 198  | C | A | 14  | 17  | -- | --   |
|            | Ca(ICCV2/PI489777)SNP_06614 | 538  | C | T | 21  | 13  | -- | --   |
|            | Ca(ICCV2/PI489777)SNP_06615 | 630  | C | T | 35  | 19  | -- | --   |
|            | Ca(ICCV2/PI489777)SNP_06616 | 727  | C | A | 36  | 25  | -- | --   |
|            | Ca(ICCV2/PI489777)SNP_06617 | 954  | C | G | 28  | 45  | -- | --   |
|            | Ca(ICCV2/PI489777)SNP_06618 | 1347 | C | G | 21  | 42  | -- | --   |
| CakTC37457 | Ca(ICCV2/PI489777)SNP_06619 | 186  | A | C | 18  | 7   | -- | WRKY |
|            | Ca(ICCV2/PI489777)SNP_06620 | 189  | A | C | 16  | 7   | -- | WRKY |
|            | Ca(ICCV2/PI489777)SNP_06621 | 216  | T | C | 16  | 7   | -- | WRKY |
|            | Ca(ICCV2/PI489777)SNP_06622 | 465  | C | T | 12  | 6   | -- | WRKY |
|            | Ca(ICCV2/PI489777)SNP_06623 | 558  | T | C | 10  | 7   | -- | WRKY |
|            | Ca(ICCV2/PI489777)SNP_06624 | 777  | T | C | 9   | 9   | -- | WRKY |
|            | Ca(ICCV2/PI489777)SNP_06625 | 846  | C | A | 7   | 9   | -- | WRKY |
| CakTC27102 | Ca(ICCV2/PI489777)SNP_06626 | 160  | G | A | 75  | 34  | -- | --   |
|            | Ca(ICCV2/PI489777)SNP_06627 | 392  | A | T | 138 | 205 | -- | --   |
|            | Ca(ICCV2/PI489777)SNP_06628 | 433  | G | A | 152 | 242 | -- | --   |
|            | Ca(ICCV2/PI489777)SNP_06629 | 478  | G | A | 179 | 256 | -- | --   |
| CakTC40929 | Ca(ICCV2/PI489777)SNP_06630 | 1565 | T | C | 8   | 7   | -- | --   |
|            | Ca(ICCV2/PI489777)SNP_06631 | 1820 | A | C | 12  | 5   | -- | --   |
|            | Ca(ICCV2/PI489777)SNP_06632 | 1870 | T | C | 10  | 5   | -- | --   |
|            | Ca(ICCV2/PI489777)SNP_06633 | 1934 | T | C | 11  | 3   | -- | --   |
| CakTC40568 | Ca(ICCV2/PI489777)SNP_06634 | 299  | G | A | 13  | 7   | -- | --   |
|            | Ca(ICCV2/PI489777)SNP_06635 | 338  | T | C | 16  | 6   | -- | --   |
|            | Ca(ICCV2/PI489777)SNP_06636 | 348  | C | T | 16  | 6   | -- | --   |
|            | Ca(ICCV2/PI489777)SNP_06637 | 367  | A | G | 15  | 8   | -- | --   |
|            | Ca(ICCV2/PI489777)SNP_06638 | 463  | G | C | 17  | 6   | -- | --   |
|            | Ca(ICCV2/PI489777)SNP_06639 | 566  | T | A | 7   | 8   | -- | --   |
| CakTC37582 | Ca(ICCV2/PI489777)SNP_06640 | 1092 | C | A | 6   | 4   | -- | --   |
|            | Ca(ICCV2/PI489777)SNP_06641 | 1116 | A | C | 6   | 4   | -- | --   |
|            | Ca(ICCV2/PI489777)SNP_06642 | 1117 | A | C | 6   | 4   | -- | --   |
| CakTC31759 | Ca(ICCV2/PI489777)SNP_06643 | 628  | T | G | 9   | 25  | -- | --   |
|            | Ca(ICCV2/PI489777)SNP_06644 | 644  | A | G | 9   | 18  | -- | --   |
| CakTC30255 | Ca(ICCV2/PI489777)SNP_06645 | 2146 | A | T | 16  | 6   | -- | --   |
| CakTC43039 | Ca(ICCV2/PI489777)SNP_06646 | 627  | G | A | 6   | 4   | -- | --   |
|            | Ca(ICCV2/PI489777)SNP_06647 | 1222 | T | C | 6   | 3   | -- | --   |
| CakTC24155 | Ca(ICCV2/PI489777)SNP_06648 | 240  | A | G | 5   | 5   | -- | --   |
|            | Ca(ICCV2/PI489777)SNP_06649 | 242  | A | C | 5   | 5   | -- | --   |
|            | Ca(ICCV2/PI489777)SNP_06650 | 630  | G | T | 10  | 5   | -- | --   |
|            | Ca(ICCV2/PI489777)SNP_06651 | 679  | T | A | 10  | 6   | -- | --   |
|            | Ca(ICCV2/PI489777)SNP_06652 | 1150 | T | A | 7   | 4   | -- | --   |
| CakTC25835 | Ca(ICCV2/PI489777)SNP_06653 | 1520 | A | G | 15  | 8   | -- | --   |
|            | Ca(ICCV2/PI489777)SNP_06654 | 1679 | G | A | 13  | 10  | -- | --   |
|            | Ca(ICCV2/PI489777)SNP_06655 | 1721 | G | T | 12  | 11  | -- | --   |

|            |                            |      |   |   |    |    |           |     |
|------------|----------------------------|------|---|---|----|----|-----------|-----|
|            | Ca(ICC2/PI489777)SNP_06656 | 2330 | T | C | 45 | 20 | --        | --  |
|            | Ca(ICC2/PI489777)SNP_06657 | 2717 | T | G | 62 | 29 | --        | --  |
|            | Ca(ICC2/PI489777)SNP_06658 | 2950 | G | A | 70 | 24 | --        | --  |
|            | Ca(ICC2/PI489777)SNP_06659 | 2957 | A | G | 66 | 22 | --        | --  |
|            | Ca(ICC2/PI489777)SNP_06660 | 3011 | A | T | 67 | 23 | --        | --  |
|            | Ca(ICC2/PI489777)SNP_06661 | 3050 | G | A | 53 | 25 | --        | --  |
|            | Ca(ICC2/PI489777)SNP_06662 | 3134 | A | G | 48 | 37 | --        | --  |
|            | Ca(ICC2/PI489777)SNP_06663 | 3146 | C | T | 59 | 35 | --        | --  |
| CakTC10220 | Ca(ICC2/PI489777)SNP_06664 | 1540 | G | A | 4  | 3  | --        | --  |
| CakTC38122 | Ca(ICC2/PI489777)SNP_06665 | 269  | G | C | 10 | 5  | --        | MYB |
|            | Ca(ICC2/PI489777)SNP_06666 | 278  | C | T | 11 | 5  | --        | MYB |
|            | Ca(ICC2/PI489777)SNP_06667 | 308  | C | T | 13 | 6  | --        | MYB |
|            | Ca(ICC2/PI489777)SNP_06668 | 389  | A | C | 11 | 6  | --        | MYB |
|            | Ca(ICC2/PI489777)SNP_06669 | 439  | A | T | 10 | 7  | --        | MYB |
|            | Ca(ICC2/PI489777)SNP_06670 | 708  | A | C | 7  | 8  | --        | MYB |
| CakTC30541 | Ca(ICC2/PI489777)SNP_06671 | 535  | G | A | 10 | 6  | --        | TPR |
|            | Ca(ICC2/PI489777)SNP_06672 | 581  | A | G | 9  | 5  | --        | TPR |
|            | Ca(ICC2/PI489777)SNP_06673 | 798  | G | A | 12 | 13 | --        | TPR |
|            | Ca(ICC2/PI489777)SNP_06674 | 883  | A | C | 19 | 28 | --        | TPR |
|            | Ca(ICC2/PI489777)SNP_06675 | 1344 | T | C | 13 | 4  | --        | TPR |
|            | Ca(ICC2/PI489777)SNP_06676 | 1988 | A | G | 20 | 6  | --        | TPR |
|            | Ca(ICC2/PI489777)SNP_06677 | 2480 | T | A | 17 | 11 | --        | TPR |
|            | Ca(ICC2/PI489777)SNP_06678 | 3049 | T | A | 13 | 11 | --        | TPR |
|            | Ca(ICC2/PI489777)SNP_06679 | 3103 | T | C | 13 | 13 | --        | TPR |
|            | Ca(ICC2/PI489777)SNP_06680 | 3194 | G | A | 14 | 11 | --        | TPR |
|            | Ca(ICC2/PI489777)SNP_06681 | 3214 | C | G | 14 | 13 | --        | TPR |
|            | Ca(ICC2/PI489777)SNP_06682 | 3313 | A | T | 9  | 9  | --        | TPR |
| CakTC28364 | Ca(ICC2/PI489777)SNP_06683 | 366  | C | T | 9  | 12 | Flower    | bud |
| CakTC27742 | Ca(ICC2/PI489777)SNP_06684 | 321  | C | A | 45 | 5  | --        | --  |
|            | Ca(ICC2/PI489777)SNP_06685 | 452  | T | C | 42 | 9  | --        | --  |
|            | Ca(ICC2/PI489777)SNP_06686 | 472  | A | G | 64 | 9  | --        | --  |
|            | Ca(ICC2/PI489777)SNP_06687 | 591  | T | A | 58 | 11 | --        | --  |
|            | Ca(ICC2/PI489777)SNP_06688 | 593  | T | A | 58 | 11 | --        | --  |
| CakTC32317 | Ca(ICC2/PI489777)SNP_06689 | 369  | C | T | 4  | 3  | --        | --  |
| CakTC23164 | Ca(ICC2/PI489777)SNP_06690 | 745  | G | A | 8  | 4  | --        | --  |
|            | Ca(ICC2/PI489777)SNP_06691 | 781  | G | A | 10 | 4  | --        | --  |
|            | Ca(ICC2/PI489777)SNP_06692 | 834  | C | T | 15 | 4  | --        | --  |
|            | Ca(ICC2/PI489777)SNP_06693 | 862  | G | T | 19 | 4  | --        | --  |
|            | Ca(ICC2/PI489777)SNP_06694 | 890  | C | T | 16 | 4  | --        | --  |
|            | Ca(ICC2/PI489777)SNP_06695 | 1318 | G | A | 16 | 6  | --        | --  |
| CakTC31423 | Ca(ICC2/PI489777)SNP_06696 | 825  | A | G | 7  | 7  | --        | --  |
|            | Ca(ICC2/PI489777)SNP_06697 | 849  | A | G | 7  | 8  | --        | --  |
| CakTC24050 | Ca(ICC2/PI489777)SNP_06698 | 323  | G | A | 16 | 4  | --        | --  |
|            | Ca(ICC2/PI489777)SNP_06699 | 567  | T | C | 10 | 5  | --        | --  |
| CakTC35113 | Ca(ICC2/PI489777)SNP_06700 | 944  | T | C | 37 | 20 | --        | --  |
| CakTC33694 | Ca(ICC2/PI489777)SNP_06701 | 798  | C | T | 3  | 4  | --        | --  |
|            | Ca(ICC2/PI489777)SNP_06702 | 1091 | A | G | 3  | 4  | --        | --  |
|            | Ca(ICC2/PI489777)SNP_06703 | 1322 | C | T | 3  | 3  | --        | --  |
| CakTC30834 | Ca(ICC2/PI489777)SNP_06704 | 897  | A | G | 16 | 5  | --        | --  |
|            | Ca(ICC2/PI489777)SNP_06705 | 1292 | G | A | 12 | 3  | --        | --  |
| CakTC41745 | Ca(ICC2/PI489777)SNP_06706 | 65   | C | G | 3  | 8  | --        | --  |
|            | Ca(ICC2/PI489777)SNP_06707 | 211  | T | C | 11 | 11 | --        | --  |
| CakTC36402 | Ca(ICC2/PI489777)SNP_06708 | 256  | G | T | 4  | 7  | Young_pod | --  |
| CakTC25367 | Ca(ICC2/PI489777)SNP_06709 | 680  | C | T | 29 | 17 | --        | --  |
|            | Ca(ICC2/PI489777)SNP_06710 | 917  | C | T | 39 | 27 | --        | --  |
|            | Ca(ICC2/PI489777)SNP_06711 | 1151 | A | G | 46 | 30 | --        | --  |
|            | Ca(ICC2/PI489777)SNP_06712 | 1304 | C | T | 51 | 18 | --        | --  |
|            | Ca(ICC2/PI489777)SNP_06713 | 1604 | T | C | 30 | 26 | --        | --  |
|            | Ca(ICC2/PI489777)SNP_06714 | 1775 | C | T | 50 | 38 | --        | --  |
|            | Ca(ICC2/PI489777)SNP_06715 | 2228 | C | T | 52 | 37 | --        | --  |
|            | Ca(ICC2/PI489777)SNP_06716 | 2804 | T | C | 62 | 28 | --        | --  |
|            | Ca(ICC2/PI489777)SNP_06717 | 2865 | C | G | 44 | 24 | --        | --  |
|            | Ca(ICC2/PI489777)SNP_06718 | 3590 | G | A | 83 | 40 | --        | --  |
| CakTC38174 | Ca(ICC2/PI489777)SNP_06719 | 196  | C | T | 6  | 10 | --        | --  |
|            | Ca(ICC2/PI489777)SNP_06720 | 445  | G | T | 10 | 15 | --        | --  |
|            | Ca(ICC2/PI489777)SNP_06721 | 670  | C | T | 14 | 8  | --        | --  |
|            | Ca(ICC2/PI489777)SNP_06722 | 1448 | C | G | 10 | 5  | --        | --  |
|            | Ca(ICC2/PI489777)SNP_06723 | 1505 | T | C | 7  | 3  | --        | --  |
| CakTC38132 | Ca(ICC2/PI489777)SNP_06724 | 448  | A | G | 18 | 11 | --        | --  |
| CakTC26787 | Ca(ICC2/PI489777)SNP_06725 | 1110 | C | G | 5  | 4  | --        | --  |
| CakTC14223 | Ca(ICC2/PI489777)SNP_06726 | 152  | G | A | 4  | 3  | --        | --  |
| CakTC23352 | Ca(ICC2/PI489777)SNP_06727 | 188  | C | T | 7  | 11 | --        | --  |
| CakTC40166 | Ca(ICC2/PI489777)SNP_06728 | 656  | A | G | 33 | 24 | --        | --  |
| CakTC01243 | Ca(ICC2/PI489777)SNP_06729 | 514  | T | A | 28 | 9  | --        | --  |

|            |                            |      |   |   |     |     |           |     |
|------------|----------------------------|------|---|---|-----|-----|-----------|-----|
|            | Ca(ICC2/PI489777)SNP_06730 | 703  | C | T | 15  | 5   | --        | --  |
| CakTC31331 | Ca(ICC2/PI489777)SNP_06731 | 312  | T | C | 5   | 14  | --        | --  |
|            | Ca(ICC2/PI489777)SNP_06732 | 385  | G | A | 8   | 14  | --        | --  |
|            | Ca(ICC2/PI489777)SNP_06733 | 991  | A | G | 24  | 13  | --        | --  |
|            | Ca(ICC2/PI489777)SNP_06734 | 1238 | T | C | 21  | 12  | --        | --  |
|            | Ca(ICC2/PI489777)SNP_06735 | 1347 | A | T | 16  | 15  | --        | --  |
|            | Ca(ICC2/PI489777)SNP_06736 | 1472 | G | T | 8   | 15  | --        | --  |
| CakTC35899 | Ca(ICC2/PI489777)SNP_06737 | 262  | A | G | 26  | 8   | --        | --  |
|            | Ca(ICC2/PI489777)SNP_06738 | 344  | G | C | 27  | 8   | --        | --  |
|            | Ca(ICC2/PI489777)SNP_06739 | 354  | C | A | 27  | 8   | --        | --  |
|            | Ca(ICC2/PI489777)SNP_06740 | 403  | T | C | 22  | 8   | --        | --  |
|            | Ca(ICC2/PI489777)SNP_06741 | 420  | T | A | 14  | 7   | --        | --  |
|            | Ca(ICC2/PI489777)SNP_06742 | 444  | G | A | 7   | 4   | --        | --  |
| CakTC40532 | Ca(ICC2/PI489777)SNP_06743 | 2096 | T | G | 13  | 12  | --        | --  |
|            | Ca(ICC2/PI489777)SNP_06744 | 2117 | G | A | 12  | 12  | --        | --  |
|            | Ca(ICC2/PI489777)SNP_06745 | 2120 | G | A | 14  | 12  | --        | --  |
|            | Ca(ICC2/PI489777)SNP_06746 | 2265 | A | G | 8   | 9   | --        | --  |
| CakTC27677 | Ca(ICC2/PI489777)SNP_06747 | 263  | T | C | 3   | 3   | --        | --  |
| CakTC22643 | Ca(ICC2/PI489777)SNP_06748 | 331  | A | C | 69  | 14  | --        | --  |
| CakTC39947 | Ca(ICC2/PI489777)SNP_06749 | 118  | T | C | 12  | 5   | --        | --  |
|            | Ca(ICC2/PI489777)SNP_06750 | 244  | G | A | 14  | 9   | --        | --  |
|            | Ca(ICC2/PI489777)SNP_06751 | 849  | C | T | 17  | 26  | --        | --  |
| CakTC23204 | Ca(ICC2/PI489777)SNP_06752 | 200  | A | G | 242 | 114 | --        | --  |
|            | Ca(ICC2/PI489777)SNP_06753 | 641  | C | T | 425 | 151 | --        | --  |
|            | Ca(ICC2/PI489777)SNP_06754 | 692  | T | C | 432 | 151 | --        | --  |
| CakTC25298 | Ca(ICC2/PI489777)SNP_06755 | 330  | C | T | 13  | 3   | --        | --  |
|            | Ca(ICC2/PI489777)SNP_06756 | 1644 | G | A | 14  | 3   | --        | --  |
| CakTC09534 | Ca(ICC2/PI489777)SNP_06757 | 970  | G | A | 16  | 6   | --        | --  |
|            | Ca(ICC2/PI489777)SNP_06758 | 1690 | C | T | 17  | 10  | --        | --  |
|            | Ca(ICC2/PI489777)SNP_06759 | 1795 | G | A | 21  | 8   | --        | --  |
|            | Ca(ICC2/PI489777)SNP_06760 | 2180 | C | G | 14  | 5   | --        | --  |
| CakTC34692 | Ca(ICC2/PI489777)SNP_06761 | 201  | T | G | 8   | 3   | --        | TPR |
|            | Ca(ICC2/PI489777)SNP_06762 | 220  | A | T | 9   | 3   | --        | TPR |
|            | Ca(ICC2/PI489777)SNP_06763 | 1858 | C | T | 10  | 6   | --        | TPR |
|            | Ca(ICC2/PI489777)SNP_06764 | 1957 | G | T | 9   | 8   | --        | TPR |
|            | Ca(ICC2/PI489777)SNP_06765 | 2308 | T | C | 17  | 9   | --        | TPR |
|            | Ca(ICC2/PI489777)SNP_06766 | 2605 | A | G | 13  | 9   | --        | TPR |
|            | Ca(ICC2/PI489777)SNP_06767 | 2665 | A | G | 16  | 9   | --        | TPR |
|            | Ca(ICC2/PI489777)SNP_06768 | 3426 | G | A | 15  | 7   | --        | TPR |
| CakTC33061 | Ca(ICC2/PI489777)SNP_06769 | 142  | G | A | 12  | 6   | --        | --  |
|            | Ca(ICC2/PI489777)SNP_06770 | 144  | T | G | 10  | 6   | --        | --  |
|            | Ca(ICC2/PI489777)SNP_06771 | 381  | A | G | 7   | 6   | --        | --  |
|            | Ca(ICC2/PI489777)SNP_06772 | 484  | C | A | 3   | 4   | --        | --  |
| CakTC26442 | Ca(ICC2/PI489777)SNP_06773 | 1044 | T | G | 8   | 13  | --        | --  |
|            | Ca(ICC2/PI489777)SNP_06774 | 1176 | G | C | 11  | 9   | --        | --  |
|            | Ca(ICC2/PI489777)SNP_06775 | 1797 | G | A | 7   | 7   | --        | --  |
|            | Ca(ICC2/PI489777)SNP_06776 | 1821 | T | C | 6   | 6   | --        | --  |
| CakTC26216 | Ca(ICC2/PI489777)SNP_06777 | 1066 | A | G | 32  | 21  | --        | --  |
|            | Ca(ICC2/PI489777)SNP_06778 | 1092 | G | T | 21  | 13  | --        | --  |
|            | Ca(ICC2/PI489777)SNP_06779 | 1222 | G | C | 7   | 4   | --        | --  |
| CakTC41444 | Ca(ICC2/PI489777)SNP_06780 | 512  | A | T | 48  | 7   | --        | --  |
|            | Ca(ICC2/PI489777)SNP_06781 | 524  | T | A | 47  | 9   | --        | --  |
|            | Ca(ICC2/PI489777)SNP_06782 | 530  | C | T | 46  | 9   | --        | --  |
|            | Ca(ICC2/PI489777)SNP_06783 | 547  | T | C | 41  | 9   | --        | --  |
| CakTC33613 | Ca(ICC2/PI489777)SNP_06784 | 621  | G | A | 21  | 15  | --        | --  |
|            | Ca(ICC2/PI489777)SNP_06785 | 956  | A | G | 16  | 7   | --        | --  |
| CakTC39582 | Ca(ICC2/PI489777)SNP_06786 | 377  | T | C | 12  | 7   | --        | --  |
|            | Ca(ICC2/PI489777)SNP_06787 | 737  | C | T | 9   | 9   | --        | --  |
|            | Ca(ICC2/PI489777)SNP_06788 | 902  | G | A | 8   | 8   | --        | --  |
| CakTC38147 | Ca(ICC2/PI489777)SNP_06789 | 489  | G | A | 4   | 3   | --        | --  |
| CakTC28788 | Ca(ICC2/PI489777)SNP_06790 | 1146 | T | C | 5   | 4   | --        | --  |
| CakTC31644 | Ca(ICC2/PI489777)SNP_06791 | 1015 | G | A | 7   | 4   | --        | --  |
|            | Ca(ICC2/PI489777)SNP_06792 | 1406 | C | T | 5   | 4   | --        | --  |
|            | Ca(ICC2/PI489777)SNP_06793 | 1412 | T | C | 5   | 4   | --        | --  |
| CakTC09559 | Ca(ICC2/PI489777)SNP_06794 | 440  | G | A | 3   | 3   | Young_pod | --  |
| CakTC42491 | Ca(ICC2/PI489777)SNP_06795 | 252  | C | A | 6   | 7   | --        | --  |
| CakTC25543 | Ca(ICC2/PI489777)SNP_06796 | 137  | C | G | 5   | 5   | --        | HB  |
|            | Ca(ICC2/PI489777)SNP_06797 | 181  | C | G | 8   | 15  | --        | HB  |
|            | Ca(ICC2/PI489777)SNP_06798 | 217  | G | A | 9   | 11  | --        | HB  |
|            | Ca(ICC2/PI489777)SNP_06799 | 280  | C | T | 17  | 18  | --        | HB  |
|            | Ca(ICC2/PI489777)SNP_06800 | 845  | C | G | 127 | 57  | --        | HB  |
|            | Ca(ICC2/PI489777)SNP_06801 | 857  | G | A | 118 | 57  | --        | HB  |
|            | Ca(ICC2/PI489777)SNP_06802 | 884  | C | T | 113 | 49  | --        | HB  |
|            | Ca(ICC2/PI489777)SNP_06803 | 1495 | G | A | 42  | 34  | --        | HB  |

|            |                            |      |   |   |     |    |        |     |
|------------|----------------------------|------|---|---|-----|----|--------|-----|
| CakTC23428 | Ca(ICC2/P1489777)SNP_06804 | 984  | A | C | 70  | 9  | --     | HMG |
|            | Ca(ICC2/P1489777)SNP_06805 | 991  | T | C | 64  | 11 | --     | HMG |
|            | Ca(ICC2/P1489777)SNP_06806 | 1136 | C | A | 81  | 11 | --     | HMG |
|            | Ca(ICC2/P1489777)SNP_06807 | 1141 | G | A | 79  | 9  | --     | HMG |
|            | Ca(ICC2/P1489777)SNP_06808 | 1200 | G | A | 72  | 10 | --     | HMG |
|            | Ca(ICC2/P1489777)SNP_06809 | 1515 | C | T | 16  | 9  | --     | HMG |
| CakTC26256 | Ca(ICC2/P1489777)SNP_06810 | 165  | G | C | 17  | 5  | --     | --  |
|            | Ca(ICC2/P1489777)SNP_06811 | 501  | G | A | 30  | 10 | --     | --  |
|            | Ca(ICC2/P1489777)SNP_06812 | 789  | T | C | 29  | 9  | --     | --  |
| CakTC08454 | Ca(ICC2/P1489777)SNP_06813 | 112  | G | C | 33  | 6  | --     | --  |
|            | Ca(ICC2/P1489777)SNP_06814 | 235  | C | A | 38  | 8  | --     | --  |
|            | Ca(ICC2/P1489777)SNP_06815 | 299  | A | C | 31  | 8  | --     | --  |
|            | Ca(ICC2/P1489777)SNP_06816 | 461  | G | A | 27  | 7  | --     | --  |
|            | Ca(ICC2/P1489777)SNP_06817 | 569  | G | T | 14  | 6  | --     | --  |
|            | Ca(ICC2/P1489777)SNP_06818 | 914  | C | T | 52  | 13 | --     | --  |
|            | Ca(ICC2/P1489777)SNP_06819 | 930  | T | C | 54  | 14 | --     | --  |
|            | Ca(ICC2/P1489777)SNP_06820 | 984  | A | C | 54  | 12 | --     | --  |
| CakTC41617 | Ca(ICC2/P1489777)SNP_06821 | 430  | G | A | 19  | 5  | --     | --  |
|            | Ca(ICC2/P1489777)SNP_06822 | 563  | G | A | 14  | 3  | --     | --  |
| CakTC25054 | Ca(ICC2/P1489777)SNP_06823 | 159  | T | C | 29  | 5  | --     | --  |
| CakTC26781 | Ca(ICC2/P1489777)SNP_06824 | 674  | C | T | 3   | 3  | --     | --  |
| CakTC25427 | Ca(ICC2/P1489777)SNP_06825 | 42   | T | C | 15  | 29 | Root   | --  |
| CakTC41019 | Ca(ICC2/P1489777)SNP_06826 | 1045 | C | T | 19  | 8  | --     | --  |
|            | Ca(ICC2/P1489777)SNP_06827 | 1501 | C | T | 26  | 8  | --     | --  |
| CakTC35085 | Ca(ICC2/P1489777)SNP_06828 | 150  | G | C | 10  | 4  | Flower | bud |
|            | Ca(ICC2/P1489777)SNP_06829 | 620  | A | G | 9   | 7  | Flower | bud |
|            | Ca(ICC2/P1489777)SNP_06830 | 2350 | G | A | 9   | 9  | Flower | bud |
| CakTC27751 | Ca(ICC2/P1489777)SNP_06831 | 1382 | G | A | 9   | 11 | Flower | bud |
|            | Ca(ICC2/P1489777)SNP_06832 | 1387 | A | G | 9   | 11 | Flower | bud |
|            | Ca(ICC2/P1489777)SNP_06833 | 4221 | T | C | 4   | 10 | Flower | bud |
| CakTC30125 | Ca(ICC2/P1489777)SNP_06834 | 306  | A | T | 13  | 6  | --     | --  |
| CakTC24824 | Ca(ICC2/P1489777)SNP_06835 | 1047 | C | T | 6   | 4  | --     | MYB |
|            | Ca(ICC2/P1489777)SNP_06836 | 1098 | G | A | 6   | 4  | --     | MYB |
|            | Ca(ICC2/P1489777)SNP_06837 | 1170 | T | A | 9   | 7  | --     | MYB |
|            | Ca(ICC2/P1489777)SNP_06838 | 1357 | G | A | 18  | 8  | --     | MYB |
|            | Ca(ICC2/P1489777)SNP_06839 | 1600 | G | A | 17  | 8  | --     | MYB |
|            | Ca(ICC2/P1489777)SNP_06840 | 1652 | T | C | 16  | 9  | --     | MYB |
|            | Ca(ICC2/P1489777)SNP_06841 | 1802 | T | A | 9   | 9  | --     | MYB |
|            | Ca(ICC2/P1489777)SNP_06842 | 1937 | G | A | 12  | 10 | --     | MYB |
|            | Ca(ICC2/P1489777)SNP_06843 | 2333 | T | C | 5   | 5  | --     | MYB |
|            | Ca(ICC2/P1489777)SNP_06844 | 2695 | T | C | 5   | 3  | --     | MYB |
|            | Ca(ICC2/P1489777)SNP_06845 | 3134 | A | G | 7   | 5  | --     | MYB |
|            | Ca(ICC2/P1489777)SNP_06846 | 3146 | A | G | 7   | 5  | --     | MYB |
| CakTC31691 | Ca(ICC2/P1489777)SNP_06847 | 306  | A | C | 6   | 4  | --     | --  |
|            | Ca(ICC2/P1489777)SNP_06848 | 342  | G | A | 6   | 5  | --     | --  |
|            | Ca(ICC2/P1489777)SNP_06849 | 526  | T | A | 7   | 6  | --     | --  |
|            | Ca(ICC2/P1489777)SNP_06850 | 702  | G | A | 7   | 5  | --     | --  |
|            | Ca(ICC2/P1489777)SNP_06851 | 876  | A | G | 8   | 4  | --     | --  |
|            | Ca(ICC2/P1489777)SNP_06852 | 894  | G | A | 8   | 5  | --     | --  |
|            | Ca(ICC2/P1489777)SNP_06853 | 972  | A | G | 10  | 4  | --     | --  |
| CakTC11408 | Ca(ICC2/P1489777)SNP_06854 | 353  | C | G | 3   | 3  | --     | --  |
| CakTC28688 | Ca(ICC2/P1489777)SNP_06855 | 938  | T | C | 13  | 5  | --     | --  |
|            | Ca(ICC2/P1489777)SNP_06856 | 1863 | A | T | 8   | 4  | --     | --  |
| CakTC26795 | Ca(ICC2/P1489777)SNP_06857 | 426  | G | T | 13  | 3  | --     | --  |
|            | Ca(ICC2/P1489777)SNP_06858 | 494  | T | C | 14  | 3  | --     | --  |
|            | Ca(ICC2/P1489777)SNP_06859 | 993  | C | T | 20  | 16 | --     | --  |
|            | Ca(ICC2/P1489777)SNP_06860 | 2422 | G | A | 22  | 9  | --     | --  |
| CakTC40276 | Ca(ICC2/P1489777)SNP_06861 | 132  | T | C | 7   | 8  | --     | --  |
| CakTC32175 | Ca(ICC2/P1489777)SNP_06862 | 674  | G | A | 11  | 3  | --     | --  |
|            | Ca(ICC2/P1489777)SNP_06863 | 814  | T | A | 6   | 4  | --     | --  |
| CakTC43209 | Ca(ICC2/P1489777)SNP_06864 | 1380 | G | A | 8   | 8  | --     | --  |
|            | Ca(ICC2/P1489777)SNP_06865 | 1542 | A | G | 11  | 5  | --     | --  |
|            | Ca(ICC2/P1489777)SNP_06866 | 1608 | C | T | 10  | 4  | --     | --  |
| CakTC25707 | Ca(ICC2/P1489777)SNP_06867 | 256  | A | T | 106 | 3  | --     | --  |
|            | Ca(ICC2/P1489777)SNP_06868 | 345  | C | T | 148 | 13 | --     | --  |
|            | Ca(ICC2/P1489777)SNP_06869 | 369  | C | T | 134 | 15 | --     | --  |
|            | Ca(ICC2/P1489777)SNP_06870 | 429  | C | T | 169 | 19 | --     | --  |
|            | Ca(ICC2/P1489777)SNP_06871 | 453  | A | C | 181 | 22 | --     | --  |
|            | Ca(ICC2/P1489777)SNP_06872 | 630  | C | T | 185 | 26 | --     | --  |
|            | Ca(ICC2/P1489777)SNP_06873 | 636  | C | T | 192 | 29 | --     | --  |
|            | Ca(ICC2/P1489777)SNP_06874 | 783  | G | C | 234 | 26 | --     | --  |
|            | Ca(ICC2/P1489777)SNP_06875 | 1489 | G | A | 209 | 38 | --     | --  |
|            | Ca(ICC2/P1489777)SNP_06876 | 1672 | C | T | 159 | 12 | --     | --  |
|            | Ca(ICC2/P1489777)SNP_06877 | 1687 | C | G | 165 | 20 | --     | --  |

|            |                            |      |   |   |     |    |    |      |
|------------|----------------------------|------|---|---|-----|----|----|------|
|            | Ca(ICC2/PI489777)SNP_06878 | 1793 | C | T | 153 | 9  | -- | --   |
|            | Ca(ICC2/PI489777)SNP_06879 | 1907 | A | G | 94  | 4  | -- | --   |
| CakTC25358 | Ca(ICC2/PI489777)SNP_06880 | 402  | C | T | 4   | 3  | -- | --   |
| CakTC38633 | Ca(ICC2/PI489777)SNP_06881 | 390  | C | T | 9   | 9  | -- | --   |
| CakTC37535 | Ca(ICC2/PI489777)SNP_06882 | 195  | A | T | 19  | 10 | -- | --   |
|            | Ca(ICC2/PI489777)SNP_06883 | 328  | C | T | 18  | 12 | -- | --   |
|            | Ca(ICC2/PI489777)SNP_06884 | 346  | T | C | 18  | 10 | -- | --   |
|            | Ca(ICC2/PI489777)SNP_06885 | 565  | T | C | 12  | 7  | -- | --   |
| CakTC36841 | Ca(ICC2/PI489777)SNP_06886 | 874  | G | T | 20  | 7  | -- | --   |
|            | Ca(ICC2/PI489777)SNP_06887 | 990  | A | G | 24  | 6  | -- | --   |
|            | Ca(ICC2/PI489777)SNP_06888 | 993  | C | T | 24  | 6  | -- | --   |
|            | Ca(ICC2/PI489777)SNP_06889 | 1050 | A | G | 20  | 6  | -- | --   |
|            | Ca(ICC2/PI489777)SNP_06890 | 1972 | C | A | 29  | 11 | -- | --   |
|            | Ca(ICC2/PI489777)SNP_06891 | 2520 | C | T | 25  | 18 | -- | --   |
|            | Ca(ICC2/PI489777)SNP_06892 | 2523 | T | C | 26  | 18 | -- | --   |
|            | Ca(ICC2/PI489777)SNP_06893 | 2544 | C | T | 25  | 15 | -- | --   |
|            | Ca(ICC2/PI489777)SNP_06894 | 3306 | C | T | 20  | 22 | -- | --   |
|            | Ca(ICC2/PI489777)SNP_06895 | 3825 | G | A | 24  | 12 | -- | --   |
|            | Ca(ICC2/PI489777)SNP_06896 | 4080 | T | G | 19  | 19 | -- | --   |
|            | Ca(ICC2/PI489777)SNP_06897 | 4506 | T | C | 21  | 11 | -- | --   |
|            | Ca(ICC2/PI489777)SNP_06898 | 4740 | G | C | 4   | 6  | -- | --   |
|            | Ca(ICC2/PI489777)SNP_06899 | 4745 | C | A | 3   | 6  | -- | --   |
| CakTC05776 | Ca(ICC2/PI489777)SNP_06900 | 307  | G | A | 22  | 3  | -- | --   |
|            | Ca(ICC2/PI489777)SNP_06901 | 394  | A | T | 14  | 5  | -- | --   |
|            | Ca(ICC2/PI489777)SNP_06902 | 424  | G | A | 16  | 5  | -- | --   |
| CakTC16253 | Ca(ICC2/PI489777)SNP_06903 | 488  | G | A | 8   | 6  | -- | --   |
| CakTC09639 | Ca(ICC2/PI489777)SNP_06904 | 1151 | T | G | 5   | 5  | -- | --   |
|            | Ca(ICC2/PI489777)SNP_06905 | 1190 | T | A | 5   | 5  | -- | --   |
|            | Ca(ICC2/PI489777)SNP_06906 | 1196 | T | A | 5   | 5  | -- | --   |
|            | Ca(ICC2/PI489777)SNP_06907 | 1214 | A | G | 7   | 5  | -- | --   |
| CakTC41916 | Ca(ICC2/PI489777)SNP_06908 | 232  | C | G | 9   | 8  | -- | --   |
| CakTC40187 | Ca(ICC2/PI489777)SNP_06909 | 456  | G | C | 7   | 11 | -- | IWS1 |
| CakTC09862 | Ca(ICC2/PI489777)SNP_06910 | 822  | G | T | 3   | 3  | -- | --   |
| CakTC39826 | Ca(ICC2/PI489777)SNP_06911 | 214  | C | G | 10  | 11 | -- | --   |
|            | Ca(ICC2/PI489777)SNP_06912 | 1229 | C | G | 11  | 7  | -- | --   |
|            | Ca(ICC2/PI489777)SNP_06913 | 1284 | A | G | 6   | 5  | -- | --   |
|            | Ca(ICC2/PI489777)SNP_06914 | 1293 | A | G | 7   | 5  | -- | --   |
| CakTC42795 | Ca(ICC2/PI489777)SNP_06915 | 183  | A | G | 7   | 3  | -- | --   |
|            | Ca(ICC2/PI489777)SNP_06916 | 707  | T | C | 6   | 7  | -- | --   |
|            | Ca(ICC2/PI489777)SNP_06917 | 720  | A | G | 6   | 8  | -- | --   |
|            | Ca(ICC2/PI489777)SNP_06918 | 1283 | C | T | 14  | 6  | -- | --   |
|            | Ca(ICC2/PI489777)SNP_06919 | 1508 | G | T | 15  | 5  | -- | --   |
| CakTC36870 | Ca(ICC2/PI489777)SNP_06920 | 85   | C | G | 5   | 3  | -- | --   |
| CakTC37350 | Ca(ICC2/PI489777)SNP_06921 | 438  | C | A | 7   | 10 | -- | --   |
|            | Ca(ICC2/PI489777)SNP_06922 | 549  | A | G | 10  | 10 | -- | --   |
|            | Ca(ICC2/PI489777)SNP_06923 | 854  | A | G | 13  | 11 | -- | --   |
|            | Ca(ICC2/PI489777)SNP_06924 | 861  | A | G | 10  | 10 | -- | --   |
| CakTC23890 | Ca(ICC2/PI489777)SNP_06925 | 247  | A | G | 140 | 49 | -- | --   |
|            | Ca(ICC2/PI489777)SNP_06926 | 382  | A | C | 210 | 73 | -- | --   |
|            | Ca(ICC2/PI489777)SNP_06927 | 655  | T | A | 266 | 66 | -- | --   |
|            | Ca(ICC2/PI489777)SNP_06928 | 898  | C | T | 377 | 81 | -- | --   |
| CakTC22748 | Ca(ICC2/PI489777)SNP_06929 | 176  | G | A | 88  | 30 | -- | --   |
| CakTC40960 | Ca(ICC2/PI489777)SNP_06930 | 314  | C | T | 62  | 39 | -- | --   |
|            | Ca(ICC2/PI489777)SNP_06931 | 475  | G | T | 40  | 27 | -- | --   |
|            | Ca(ICC2/PI489777)SNP_06932 | 508  | G | T | 34  | 19 | -- | --   |
|            | Ca(ICC2/PI489777)SNP_06933 | 569  | A | T | 18  | 3  | -- | --   |
| CakTC34971 | Ca(ICC2/PI489777)SNP_06934 | 266  | A | G | 7   | 7  | -- | --   |
|            | Ca(ICC2/PI489777)SNP_06935 | 549  | T | C | 5   | 6  | -- | --   |
|            | Ca(ICC2/PI489777)SNP_06936 | 874  | A | G | 20  | 16 | -- | --   |
|            | Ca(ICC2/PI489777)SNP_06937 | 1096 | G | A | 20  | 7  | -- | --   |
|            | Ca(ICC2/PI489777)SNP_06938 | 1306 | G | A | 23  | 4  | -- | --   |
|            | Ca(ICC2/PI489777)SNP_06939 | 1744 | A | G | 25  | 11 | -- | --   |
|            | Ca(ICC2/PI489777)SNP_06940 | 1957 | G | C | 16  | 10 | -- | --   |
|            | Ca(ICC2/PI489777)SNP_06941 | 2108 | T | A | 7   | 12 | -- | --   |
|            | Ca(ICC2/PI489777)SNP_06942 | 2263 | A | T | 11  | 13 | -- | --   |
| CakTC30218 | Ca(ICC2/PI489777)SNP_06943 | 565  | A | G | 13  | 7  | -- | --   |
|            | Ca(ICC2/PI489777)SNP_06944 | 776  | A | T | 13  | 7  | -- | --   |
|            | Ca(ICC2/PI489777)SNP_06945 | 871  | C | T | 15  | 7  | -- | --   |
|            | Ca(ICC2/PI489777)SNP_06946 | 974  | G | A | 22  | 7  | -- | --   |
|            | Ca(ICC2/PI489777)SNP_06947 | 1451 | C | T | 18  | 7  | -- | --   |
|            | Ca(ICC2/PI489777)SNP_06948 | 2136 | G | T | 10  | 4  | -- | --   |
|            | Ca(ICC2/PI489777)SNP_06949 | 2513 | A | G | 6   | 4  | -- | --   |
| CakTC25115 | Ca(ICC2/PI489777)SNP_06950 | 228  | A | T | 17  | 8  | -- | --   |
|            | Ca(ICC2/PI489777)SNP_06951 | 445  | G | A | 80  | 30 | -- | --   |

|            |                             |      |   |   |     |    |           |      |
|------------|-----------------------------|------|---|---|-----|----|-----------|------|
|            | Ca(ICCV2/PI489777)SNP_06952 | 640  | T | C | 114 | 34 | --        | --   |
| CakTC33244 | Ca(ICCV2/PI489777)SNP_06953 | 68   | C | T | 20  | 4  | --        | --   |
|            | Ca(ICCV2/PI489777)SNP_06954 | 263  | A | G | 72  | 27 | --        | --   |
|            | Ca(ICCV2/PI489777)SNP_06955 | 315  | C | G | 73  | 27 | --        | --   |
| CakTC39489 | Ca(ICCV2/PI489777)SNP_06956 | 326  | T | C | 16  | 40 | --        | --   |
|            | Ca(ICCV2/PI489777)SNP_06957 | 392  | G | T | 14  | 39 | --        | --   |
|            | Ca(ICCV2/PI489777)SNP_06958 | 419  | A | G | 10  | 39 | --        | --   |
|            | Ca(ICCV2/PI489777)SNP_06959 | 1064 | T | A | 9   | 23 | --        | --   |
|            | Ca(ICCV2/PI489777)SNP_06960 | 1190 | C | T | 5   | 19 | --        | --   |
| CakTC40668 | Ca(ICCV2/PI489777)SNP_06961 | 432  | A | G | 4   | 3  | --        | --   |
| CakTC30246 | Ca(ICCV2/PI489777)SNP_06962 | 1389 | A | T | 66  | 24 | --        | C3H  |
| CakTC24115 | Ca(ICCV2/PI489777)SNP_06963 | 1879 | A | G | 19  | 10 | --        | --   |
| CakTC34123 | Ca(ICCV2/PI489777)SNP_06964 | 15   | C | G | 7   | 3  | --        | --   |
| CakTC25825 | Ca(ICCV2/PI489777)SNP_06965 | 586  | C | A | 27  | 4  | --        | WRKY |
|            | Ca(ICCV2/PI489777)SNP_06966 | 706  | T | C | 16  | 10 | --        | WRKY |
|            | Ca(ICCV2/PI489777)SNP_06967 | 727  | A | G | 14  | 9  | --        | WRKY |
|            | Ca(ICCV2/PI489777)SNP_06968 | 807  | C | T | 14  | 3  | --        | WRKY |
| CakTC28502 | Ca(ICCV2/PI489777)SNP_06969 | 532  | C | T | 7   | 6  | Flower    | bud  |
|            | Ca(ICCV2/PI489777)SNP_06970 | 1300 | A | T | 10  | 4  | Flower    | bud  |
|            | Ca(ICCV2/PI489777)SNP_06971 | 1693 | T | C | 11  | 9  | Flower    | bud  |
| CakTC33714 | Ca(ICCV2/PI489777)SNP_06972 | 96   | C | T | 18  | 5  | --        | --   |
| CakTC10172 | Ca(ICCV2/PI489777)SNP_06973 | 1268 | T | G | 3   | 3  | --        | --   |
|            | Ca(ICCV2/PI489777)SNP_06974 | 1623 | G | A | 5   | 5  | --        | --   |
|            | Ca(ICCV2/PI489777)SNP_06975 | 1848 | G | A | 5   | 11 | --        | --   |
| CakTC37365 | Ca(ICCV2/PI489777)SNP_06976 | 138  | G | C | 18  | 9  | --        | --   |
|            | Ca(ICCV2/PI489777)SNP_06977 | 297  | T | C | 33  | 24 | --        | --   |
|            | Ca(ICCV2/PI489777)SNP_06978 | 324  | C | A | 30  | 24 | --        | --   |
|            | Ca(ICCV2/PI489777)SNP_06979 | 357  | C | T | 35  | 24 | --        | --   |
|            | Ca(ICCV2/PI489777)SNP_06980 | 489  | T | C | 22  | 20 | --        | --   |
|            | Ca(ICCV2/PI489777)SNP_06981 | 531  | T | C | 20  | 18 | --        | --   |
|            | Ca(ICCV2/PI489777)SNP_06982 | 552  | G | A | 21  | 17 | --        | --   |
|            | Ca(ICCV2/PI489777)SNP_06983 | 591  | A | G | 21  | 17 | --        | --   |
| CakTC25656 | Ca(ICCV2/PI489777)SNP_06984 | 262  | T | C | 5   | 12 | --        | --   |
|            | Ca(ICCV2/PI489777)SNP_06985 | 334  | A | G | 5   | 13 | --        | --   |
| CakTC38125 | Ca(ICCV2/PI489777)SNP_06986 | 962  | C | T | 13  | 5  | --        | --   |
| CakTC27926 | Ca(ICCV2/PI489777)SNP_06987 | 2626 | A | G | 7   | 6  | --        | --   |
|            | Ca(ICCV2/PI489777)SNP_06988 | 2688 | A | C | 6   | 4  | --        | --   |
|            | Ca(ICCV2/PI489777)SNP_06989 | 2707 | T | C | 3   | 4  | --        | --   |
| CakTC08751 | Ca(ICCV2/PI489777)SNP_06990 | 486  | C | A | 5   | 7  | --        | --   |
|            | Ca(ICCV2/PI489777)SNP_06991 | 3000 | C | T | 3   | 8  | --        | --   |
| CakTC36630 | Ca(ICCV2/PI489777)SNP_06992 | 193  | T | A | 10  | 4  | --        | --   |
|            | Ca(ICCV2/PI489777)SNP_06993 | 194  | C | T | 11  | 4  | --        | --   |
|            | Ca(ICCV2/PI489777)SNP_06994 | 235  | A | C | 19  | 7  | --        | --   |
|            | Ca(ICCV2/PI489777)SNP_06995 | 236  | C | A | 19  | 7  | --        | --   |
|            | Ca(ICCV2/PI489777)SNP_06996 | 1427 | A | T | 12  | 8  | --        | --   |
|            | Ca(ICCV2/PI489777)SNP_06997 | 1658 | T | C | 10  | 3  | --        | --   |
|            | Ca(ICCV2/PI489777)SNP_06998 | 1751 | C | T | 5   | 4  | --        | --   |
|            | Ca(ICCV2/PI489777)SNP_06999 | 2385 | T | C | 14  | 18 | --        | --   |
|            | Ca(ICCV2/PI489777)SNP_07000 | 2459 | G | A | 16  | 17 | --        | --   |
| CakTC32680 | Ca(ICCV2/PI489777)SNP_07001 | 642  | A | T | 51  | 22 | --        | --   |
|            | Ca(ICCV2/PI489777)SNP_07002 | 1374 | G | A | 26  | 14 | --        | --   |
|            | Ca(ICCV2/PI489777)SNP_07003 | 1458 | T | G | 27  | 15 | --        | --   |
| CakTC26236 | Ca(ICCV2/PI489777)SNP_07004 | 1415 | G | T | 180 | 56 | --        | --   |
|            | Ca(ICCV2/PI489777)SNP_07005 | 1555 | G | A | 157 | 34 | --        | --   |
|            | Ca(ICCV2/PI489777)SNP_07006 | 1576 | G | A | 149 | 46 | --        | --   |
|            | Ca(ICCV2/PI489777)SNP_07007 | 1590 | G | A | 147 | 45 | --        | --   |
|            | Ca(ICCV2/PI489777)SNP_07008 | 1673 | C | T | 134 | 43 | --        | --   |
|            | Ca(ICCV2/PI489777)SNP_07009 | 1800 | A | G | 45  | 9  | --        | --   |
| CakTC09651 | Ca(ICCV2/PI489777)SNP_07010 | 1279 | A | G | 3   | 4  | Young_pod | --   |
| CakTC26487 | Ca(ICCV2/PI489777)SNP_07011 | 26   | T | C | 34  | 6  | --        | --   |
|            | Ca(ICCV2/PI489777)SNP_07012 | 105  | G | A | 48  | 9  | --        | --   |
|            | Ca(ICCV2/PI489777)SNP_07013 | 263  | C | G | 67  | 15 | --        | --   |
|            | Ca(ICCV2/PI489777)SNP_07014 | 371  | C | T | 39  | 17 | --        | --   |
|            | Ca(ICCV2/PI489777)SNP_07015 | 708  | T | A | 23  | 9  | --        | --   |
|            | Ca(ICCV2/PI489777)SNP_07016 | 904  | G | A | 12  | 6  | --        | --   |
| CakTC40222 | Ca(ICCV2/PI489777)SNP_07017 | 1402 | G | A | 17  | 7  | --        | --   |
| CakTC42486 | Ca(ICCV2/PI489777)SNP_07018 | 638  | T | C | 9   | 5  | --        | --   |
|            | Ca(ICCV2/PI489777)SNP_07019 | 1048 | A | G | 11  | 3  | --        | --   |
| CakTC09658 | Ca(ICCV2/PI489777)SNP_07020 | 301  | G | T | 108 | 58 | --        | --   |
|            | Ca(ICCV2/PI489777)SNP_07021 | 895  | T | C | 126 | 51 | --        | --   |
|            | Ca(ICCV2/PI489777)SNP_07022 | 1133 | C | T | 24  | 22 | --        | --   |
|            | Ca(ICCV2/PI489777)SNP_07023 | 1196 | A | G | 15  | 10 | --        | --   |
| CakTC08256 | Ca(ICCV2/PI489777)SNP_07024 | 288  | T | C | 10  | 6  | --        | --   |
| CakTC36123 | Ca(ICCV2/PI489777)SNP_07025 | 652  | C | G | 8   | 10 | --        | --   |

|            |                            |      |   |   |    |    |       |    |
|------------|----------------------------|------|---|---|----|----|-------|----|
|            | Ca(ICC2/PI489777)SNP_07026 | 1408 | C | T | 7  | 8  | --    | -- |
|            | Ca(ICC2/PI489777)SNP_07027 | 1928 | T | C | 16 | 8  | --    | -- |
|            | Ca(ICC2/PI489777)SNP_07028 | 2036 | T | C | 17 | 5  | --    | -- |
| CakTC00784 | Ca(ICC2/PI489777)SNP_07029 | 84   | C | A | 3  | 5  | --    | -- |
|            | Ca(ICC2/PI489777)SNP_07030 | 129  | A | G | 4  | 3  | --    | -- |
|            | Ca(ICC2/PI489777)SNP_07031 | 173  | A | C | 4  | 4  | --    | -- |
| CakTC29573 | Ca(ICC2/PI489777)SNP_07032 | 94   | G | A | 14 | 6  | --    | -- |
|            | Ca(ICC2/PI489777)SNP_07033 | 181  | A | C | 13 | 8  | --    | -- |
|            | Ca(ICC2/PI489777)SNP_07034 | 223  | A | C | 13 | 10 | --    | -- |
|            | Ca(ICC2/PI489777)SNP_07035 | 301  | C | T | 9  | 10 | --    | -- |
|            | Ca(ICC2/PI489777)SNP_07036 | 367  | G | A | 7  | 15 | --    | -- |
| CakTC30675 | Ca(ICC2/PI489777)SNP_07037 | 1081 | T | G | 5  | 5  | --    | -- |
|            | Ca(ICC2/PI489777)SNP_07038 | 1216 | T | C | 5  | 4  | --    | -- |
|            | Ca(ICC2/PI489777)SNP_07039 | 1218 | G | A | 5  | 4  | --    | -- |
| CakTC38291 | Ca(ICC2/PI489777)SNP_07040 | 479  | T | C | 9  | 7  | --    | -- |
|            | Ca(ICC2/PI489777)SNP_07041 | 781  | A | G | 10 | 6  | --    | -- |
| CakTC31781 | Ca(ICC2/PI489777)SNP_07042 | 570  | T | C | 4  | 3  | --    | -- |
|            | Ca(ICC2/PI489777)SNP_07043 | 2051 | G | A | 4  | 3  | --    | -- |
|            | Ca(ICC2/PI489777)SNP_07044 | 2350 | T | C | 3  | 4  | --    | -- |
|            | Ca(ICC2/PI489777)SNP_07045 | 2482 | T | C | 5  | 4  | --    | -- |
|            | Ca(ICC2/PI489777)SNP_07046 | 2492 | A | G | 4  | 4  | --    | -- |
|            | Ca(ICC2/PI489777)SNP_07047 | 2500 | C | T | 5  | 4  | --    | -- |
|            | Ca(ICC2/PI489777)SNP_07048 | 2691 | A | G | 4  | 5  | --    | -- |
|            | Ca(ICC2/PI489777)SNP_07049 | 2795 | G | A | 5  | 4  | --    | -- |
|            | Ca(ICC2/PI489777)SNP_07050 | 3001 | C | A | 7  | 5  | --    | -- |
|            | Ca(ICC2/PI489777)SNP_07051 | 3104 | G | A | 11 | 4  | --    | -- |
|            | Ca(ICC2/PI489777)SNP_07052 | 3636 | T | C | 6  | 8  | --    | -- |
|            | Ca(ICC2/PI489777)SNP_07053 | 3654 | T | C | 6  | 8  | --    | -- |
|            | Ca(ICC2/PI489777)SNP_07054 | 3759 | C | T | 4  | 5  | --    | -- |
|            | Ca(ICC2/PI489777)SNP_07055 | 4380 | T | C | 5  | 5  | --    | -- |
| CakTC27634 | Ca(ICC2/PI489777)SNP_07056 | 1409 | C | T | 42 | 19 | --    | -- |
|            | Ca(ICC2/PI489777)SNP_07057 | 1709 | A | G | 32 | 4  | --    | -- |
|            | Ca(ICC2/PI489777)SNP_07058 | 2595 | T | C | 15 | 6  | --    | -- |
|            | Ca(ICC2/PI489777)SNP_07059 | 2613 | A | G | 12 | 7  | --    | -- |
|            | Ca(ICC2/PI489777)SNP_07060 | 2625 | C | A | 16 | 7  | --    | -- |
| CakTC41321 | Ca(ICC2/PI489777)SNP_07061 | 2260 | T | C | 8  | 3  | --    | -- |
| CakTC35690 | Ca(ICC2/PI489777)SNP_07062 | 1448 | A | G | 8  | 3  | --    | -- |
|            | Ca(ICC2/PI489777)SNP_07063 | 3290 | A | G | 3  | 3  | --    | -- |
| CakTC36863 | Ca(ICC2/PI489777)SNP_07064 | 1793 | T | C | 13 | 7  | --    | -- |
|            | Ca(ICC2/PI489777)SNP_07065 | 1979 | C | T | 9  | 5  | --    | -- |
| CakTC42275 | Ca(ICC2/PI489777)SNP_07066 | 202  | C | T | 7  | 5  | --    | -- |
|            | Ca(ICC2/PI489777)SNP_07067 | 1000 | C | G | 14 | 10 | --    | -- |
| CakTC42403 | Ca(ICC2/PI489777)SNP_07068 | 462  | C | T | 5  | 3  | Shoot | -- |
|            | Ca(ICC2/PI489777)SNP_07069 | 490  | A | T | 8  | 3  | Shoot | -- |
|            | Ca(ICC2/PI489777)SNP_07070 | 514  | G | T | 8  | 3  | Shoot | -- |
|            | Ca(ICC2/PI489777)SNP_07071 | 634  | G | T | 6  | 3  | Shoot | -- |
|            | Ca(ICC2/PI489777)SNP_07072 | 660  | A | G | 4  | 3  | Shoot | -- |
| CakTC23284 | Ca(ICC2/PI489777)SNP_07073 | 275  | G | A | 17 | 9  | --    | -- |
|            | Ca(ICC2/PI489777)SNP_07074 | 296  | A | C | 15 | 8  | --    | -- |
|            | Ca(ICC2/PI489777)SNP_07075 | 1709 | C | T | 27 | 21 | --    | -- |
|            | Ca(ICC2/PI489777)SNP_07076 | 1843 | A | G | 27 | 12 | --    | -- |
|            | Ca(ICC2/PI489777)SNP_07077 | 1904 | G | A | 31 | 15 | --    | -- |
| CakTC42429 | Ca(ICC2/PI489777)SNP_07078 | 233  | C | T | 9  | 8  | --    | -- |
|            | Ca(ICC2/PI489777)SNP_07079 | 253  | A | G | 6  | 8  | --    | -- |
|            | Ca(ICC2/PI489777)SNP_07080 | 1146 | C | T | 6  | 12 | --    | -- |
|            | Ca(ICC2/PI489777)SNP_07081 | 1368 | G | A | 10 | 11 | --    | -- |
|            | Ca(ICC2/PI489777)SNP_07082 | 1718 | G | A | 3  | 5  | --    | -- |
| CakTC39611 | Ca(ICC2/PI489777)SNP_07083 | 468  | G | A | 12 | 15 | --    | -- |
|            | Ca(ICC2/PI489777)SNP_07084 | 1027 | A | C | 13 | 8  | --    | -- |
|            | Ca(ICC2/PI489777)SNP_07085 | 1029 | G | T | 11 | 8  | --    | -- |
| CakTC42093 | Ca(ICC2/PI489777)SNP_07086 | 545  | C | T | 3  | 22 | --    | -- |
| CakTC40375 | Ca(ICC2/PI489777)SNP_07087 | 151  | T | C | 23 | 7  | --    | -- |
|            | Ca(ICC2/PI489777)SNP_07088 | 229  | C | T | 21 | 10 | --    | -- |
|            | Ca(ICC2/PI489777)SNP_07089 | 1731 | T | C | 10 | 5  | --    | -- |
| CakTC32739 | Ca(ICC2/PI489777)SNP_07090 | 1476 | C | T | 8  | 3  | --    | HB |
| CakTC34752 | Ca(ICC2/PI489777)SNP_07091 | 396  | G | A | 5  | 4  | --    | -- |
|            | Ca(ICC2/PI489777)SNP_07092 | 405  | A | G | 4  | 3  | --    | -- |
| CakTC39711 | Ca(ICC2/PI489777)SNP_07093 | 603  | T | C | 23 | 21 | --    | -- |
| CakTC38042 | Ca(ICC2/PI489777)SNP_07094 | 43   | A | C | 22 | 10 | --    | -- |
|            | Ca(ICC2/PI489777)SNP_07095 | 132  | A | G | 20 | 17 | --    | -- |
|            | Ca(ICC2/PI489777)SNP_07096 | 306  | G | A | 33 | 22 | --    | -- |
|            | Ca(ICC2/PI489777)SNP_07097 | 441  | C | T | 24 | 26 | --    | -- |
|            | Ca(ICC2/PI489777)SNP_07098 | 572  | T | A | 16 | 18 | --    | -- |
|            | Ca(ICC2/PI489777)SNP_07099 | 600  | A | G | 22 | 16 | --    | -- |



|            |                            |      |   |   |     |     |      |     |
|------------|----------------------------|------|---|---|-----|-----|------|-----|
|            | Ca(ICC2/PI489777)SNP_07100 | 1404 | C | G | 29  | 37  | --   | --  |
| CakTC38544 | Ca(ICC2/PI489777)SNP_07101 | 600  | G | T | 10  | 5   | --   | --  |
| CakTC42592 | Ca(ICC2/PI489777)SNP_07102 | 337  | G | A | 18  | 4   | --   | --  |
|            | Ca(ICC2/PI489777)SNP_07103 | 539  | C | T | 14  | 7   | --   | --  |
|            | Ca(ICC2/PI489777)SNP_07104 | 543  | G | A | 15  | 7   | --   | --  |
|            | Ca(ICC2/PI489777)SNP_07105 | 555  | T | A | 13  | 6   | --   | --  |
|            | Ca(ICC2/PI489777)SNP_07106 | 982  | A | C | 3   | 11  | --   | --  |
| CakTC37575 | Ca(ICC2/PI489777)SNP_07107 | 492  | C | T | 58  | 63  | --   | --  |
|            | Ca(ICC2/PI489777)SNP_07108 | 564  | C | T | 76  | 31  | --   | --  |
|            | Ca(ICC2/PI489777)SNP_07109 | 612  | C | A | 63  | 28  | --   | --  |
|            | Ca(ICC2/PI489777)SNP_07110 | 678  | C | A | 48  | 30  | --   | --  |
|            | Ca(ICC2/PI489777)SNP_07111 | 1032 | C | G | 24  | 30  | --   | --  |
| CakTC22743 | Ca(ICC2/PI489777)SNP_07112 | 2383 | C | A | 9   | 5   | --   | --  |
| CakTC23247 | Ca(ICC2/PI489777)SNP_07113 | 275  | G | A | 44  | 43  | --   | --  |
|            | Ca(ICC2/PI489777)SNP_07114 | 743  | T | G | 143 | 45  | --   | --  |
| CakTC28871 | Ca(ICC2/PI489777)SNP_07115 | 956  | T | G | 5   | 3   | --   | --  |
|            | Ca(ICC2/PI489777)SNP_07116 | 975  | A | G | 4   | 3   | --   | --  |
|            | Ca(ICC2/PI489777)SNP_07117 | 978  | T | G | 4   | 3   | --   | --  |
|            | Ca(ICC2/PI489777)SNP_07118 | 1069 | T | C | 4   | 6   | --   | --  |
|            | Ca(ICC2/PI489777)SNP_07119 | 1087 | T | C | 4   | 5   | --   | --  |
|            | Ca(ICC2/PI489777)SNP_07120 | 1221 | C | T | 6   | 5   | --   | --  |
|            | Ca(ICC2/PI489777)SNP_07121 | 1243 | T | C | 6   | 4   | --   | --  |
|            | Ca(ICC2/PI489777)SNP_07122 | 1250 | T | A | 6   | 4   | --   | --  |
|            | Ca(ICC2/PI489777)SNP_07123 | 1300 | G | A | 6   | 5   | --   | --  |
|            | Ca(ICC2/PI489777)SNP_07124 | 1373 | C | T | 6   | 4   | --   | --  |
|            | Ca(ICC2/PI489777)SNP_07125 | 1494 | A | G | 10  | 3   | --   | --  |
|            | Ca(ICC2/PI489777)SNP_07126 | 1655 | C | G | 9   | 4   | --   | --  |
|            | Ca(ICC2/PI489777)SNP_07127 | 1660 | G | A | 9   | 4   | --   | --  |
|            | Ca(ICC2/PI489777)SNP_07128 | 1808 | C | T | 7   | 4   | --   | --  |
|            | Ca(ICC2/PI489777)SNP_07129 | 1865 | T | C | 6   | 3   | --   | --  |
|            | Ca(ICC2/PI489777)SNP_07130 | 1880 | C | T | 6   | 4   | --   | --  |
|            | Ca(ICC2/PI489777)SNP_07131 | 1952 | G | T | 4   | 3   | --   | --  |
|            | Ca(ICC2/PI489777)SNP_07132 | 1978 | G | T | 4   | 3   | --   | --  |
|            | Ca(ICC2/PI489777)SNP_07133 | 1987 | G | A | 4   | 3   | --   | --  |
| CakTC39257 | Ca(ICC2/PI489777)SNP_07134 | 344  | T | C | 6   | 4   | --   | --  |
|            | Ca(ICC2/PI489777)SNP_07135 | 568  | A | T | 14  | 5   | --   | --  |
|            | Ca(ICC2/PI489777)SNP_07136 | 616  | C | T | 15  | 4   | --   | --  |
| CakTC41522 | Ca(ICC2/PI489777)SNP_07137 | 551  | G | C | 10  | 3   | --   | --  |
|            | Ca(ICC2/PI489777)SNP_07138 | 921  | C | T | 61  | 23  | --   | --  |
|            | Ca(ICC2/PI489777)SNP_07139 | 993  | G | A | 71  | 26  | --   | --  |
| CakTC42326 | Ca(ICC2/PI489777)SNP_07140 | 655  | A | T | 22  | 13  | --   | --  |
|            | Ca(ICC2/PI489777)SNP_07141 | 1456 | T | C | 15  | 14  | --   | --  |
|            | Ca(ICC2/PI489777)SNP_07142 | 1506 | A | G | 14  | 8   | --   | --  |
|            | Ca(ICC2/PI489777)SNP_07143 | 1755 | G | A | 5   | 4   | --   | --  |
|            | Ca(ICC2/PI489777)SNP_07144 | 1798 | T | C | 5   | 4   | --   | --  |
| CakTC23359 | Ca(ICC2/PI489777)SNP_07145 | 13   | C | A | 157 | 114 | --   | --  |
|            | Ca(ICC2/PI489777)SNP_07146 | 60   | T | C | 282 | 153 | --   | --  |
| CakTC42800 | Ca(ICC2/PI489777)SNP_07147 | 146  | C | T | 35  | 20  | --   | --  |
|            | Ca(ICC2/PI489777)SNP_07148 | 598  | A | T | 27  | 19  | --   | --  |
|            | Ca(ICC2/PI489777)SNP_07149 | 637  | C | G | 21  | 18  | --   | --  |
| CakTC40229 | Ca(ICC2/PI489777)SNP_07150 | 36   | T | A | 6   | 5   | Root | --  |
|            | Ca(ICC2/PI489777)SNP_07151 | 150  | T | C | 12  | 13  | Root | --  |
|            | Ca(ICC2/PI489777)SNP_07152 | 249  | C | T | 20  | 24  | Root | --  |
|            | Ca(ICC2/PI489777)SNP_07153 | 607  | G | A | 41  | 41  | Root | --  |
|            | Ca(ICC2/PI489777)SNP_07154 | 612  | A | G | 44  | 38  | Root | --  |
|            | Ca(ICC2/PI489777)SNP_07155 | 665  | T | C | 41  | 35  | Root | --  |
|            | Ca(ICC2/PI489777)SNP_07156 | 666  | G | A | 41  | 33  | Root | --  |
|            | Ca(ICC2/PI489777)SNP_07157 | 741  | T | A | 38  | 40  | Root | --  |
|            | Ca(ICC2/PI489777)SNP_07158 | 813  | A | G | 38  | 36  | Root | --  |
|            | Ca(ICC2/PI489777)SNP_07159 | 831  | C | T | 35  | 40  | Root | --  |
|            | Ca(ICC2/PI489777)SNP_07160 | 840  | C | T | 32  | 39  | Root | --  |
|            | Ca(ICC2/PI489777)SNP_07161 | 842  | G | A | 37  | 40  | Root | --  |
| CakTC41166 | Ca(ICC2/PI489777)SNP_07162 | 215  | A | G | 6   | 3   | --   | TPR |
|            | Ca(ICC2/PI489777)SNP_07163 | 626  | T | C | 5   | 5   | --   | TPR |
|            | Ca(ICC2/PI489777)SNP_07164 | 1238 | A | G | 18  | 13  | --   | TPR |
|            | Ca(ICC2/PI489777)SNP_07165 | 1256 | C | G | 20  | 12  | --   | TPR |
|            | Ca(ICC2/PI489777)SNP_07166 | 1520 | C | T | 20  | 23  | --   | TPR |
|            | Ca(ICC2/PI489777)SNP_07167 | 1561 | G | C | 20  | 20  | --   | TPR |
| CakTC30266 | Ca(ICC2/PI489777)SNP_07168 | 715  | T | G | 28  | 18  | --   | --  |
|            | Ca(ICC2/PI489777)SNP_07169 | 846  | A | G | 33  | 18  | --   | --  |
|            | Ca(ICC2/PI489777)SNP_07170 | 3986 | T | A | 5   | 10  | --   | --  |
| CakTC42534 | Ca(ICC2/PI489777)SNP_07171 | 685  | G | A | 18  | 3   | --   | --  |
|            | Ca(ICC2/PI489777)SNP_07172 | 847  | G | A | 24  | 5   | --   | --  |
|            | Ca(ICC2/PI489777)SNP_07173 | 1122 | C | A | 19  | 7   | --   | --  |

|            |                            |      |   |   |     |    |    |    |
|------------|----------------------------|------|---|---|-----|----|----|----|
|            | Ca(ICC2/PI489777)SNP_07174 | 1123 | C | G | 19  | 7  | -- | -- |
|            | Ca(ICC2/PI489777)SNP_07175 | 1480 | A | G | 27  | 10 | -- | -- |
| CakTC26761 | Ca(ICC2/PI489777)SNP_07176 | 1030 | C | A | 6   | 5  | -- | -- |
| CakTC41520 | Ca(ICC2/PI489777)SNP_07177 | 1074 | A | G | 19  | 12 | -- | -- |
|            | Ca(ICC2/PI489777)SNP_07178 | 1164 | A | T | 21  | 14 | -- | -- |
|            | Ca(ICC2/PI489777)SNP_07179 | 1188 | G | A | 21  | 15 | -- | -- |
|            | Ca(ICC2/PI489777)SNP_07180 | 1533 | G | A | 30  | 7  | -- | -- |
|            | Ca(ICC2/PI489777)SNP_07181 | 1703 | G | C | 21  | 6  | -- | -- |
|            | Ca(ICC2/PI489777)SNP_07182 | 2188 | A | G | 10  | 4  | -- | -- |
| CakTC38514 | Ca(ICC2/PI489777)SNP_07183 | 647  | T | C | 7   | 8  | -- | -- |
|            | Ca(ICC2/PI489777)SNP_07184 | 1147 | G | A | 7   | 5  | -- | -- |
| CakTC42062 | Ca(ICC2/PI489777)SNP_07185 | 184  | A | G | 20  | 4  | -- | -- |
| CakTC03325 | Ca(ICC2/PI489777)SNP_07186 | 258  | C | T | 4   | 5  | -- | -- |
|            | Ca(ICC2/PI489777)SNP_07187 | 421  | C | T | 3   | 5  | -- | -- |
| CakTC35406 | Ca(ICC2/PI489777)SNP_07188 | 584  | T | C | 20  | 29 | -- | -- |
|            | Ca(ICC2/PI489777)SNP_07189 | 791  | C | T | 19  | 32 | -- | -- |
|            | Ca(ICC2/PI489777)SNP_07190 | 800  | A | T | 19  | 28 | -- | -- |
|            | Ca(ICC2/PI489777)SNP_07191 | 1034 | G | A | 44  | 48 | -- | -- |
|            | Ca(ICC2/PI489777)SNP_07192 | 1144 | C | G | 47  | 40 | -- | -- |
|            | Ca(ICC2/PI489777)SNP_07193 | 2165 | C | A | 52  | 40 | -- | -- |
|            | Ca(ICC2/PI489777)SNP_07194 | 3364 | A | T | 11  | 5  | -- | -- |
| CakTC40407 | Ca(ICC2/PI489777)SNP_07195 | 796  | C | T | 6   | 6  | -- | -- |
|            | Ca(ICC2/PI489777)SNP_07196 | 1409 | A | G | 14  | 7  | -- | -- |
|            | Ca(ICC2/PI489777)SNP_07197 | 1585 | C | T | 13  | 20 | -- | -- |
| CakTC37999 | Ca(ICC2/PI489777)SNP_07198 | 222  | T | C | 3   | 5  | -- | -- |
|            | Ca(ICC2/PI489777)SNP_07199 | 242  | C | T | 3   | 6  | -- | -- |
| CakTC32675 | Ca(ICC2/PI489777)SNP_07200 | 311  | A | G | 34  | 20 | -- | -- |
|            | Ca(ICC2/PI489777)SNP_07201 | 641  | C | A | 17  | 11 | -- | -- |
| CakTC33898 | Ca(ICC2/PI489777)SNP_07202 | 386  | A | G | 7   | 8  | -- | -- |
|            | Ca(ICC2/PI489777)SNP_07203 | 1265 | A | T | 11  | 19 | -- | -- |
|            | Ca(ICC2/PI489777)SNP_07204 | 1424 | A | T | 15  | 14 | -- | -- |
|            | Ca(ICC2/PI489777)SNP_07205 | 1677 | C | T | 15  | 4  | -- | -- |
| CakTC42654 | Ca(ICC2/PI489777)SNP_07206 | 705  | A | C | 15  | 6  | -- | -- |
|            | Ca(ICC2/PI489777)SNP_07207 | 1274 | A | G | 28  | 18 | -- | -- |
|            | Ca(ICC2/PI489777)SNP_07208 | 1508 | T | C | 24  | 17 | -- | -- |
|            | Ca(ICC2/PI489777)SNP_07209 | 1526 | G | A | 24  | 15 | -- | -- |
| CakTC39915 | Ca(ICC2/PI489777)SNP_07210 | 609  | A | G | 14  | 9  | -- | -- |
| CakTC33867 | Ca(ICC2/PI489777)SNP_07211 | 2244 | C | T | 6   | 11 | -- | -- |
|            | Ca(ICC2/PI489777)SNP_07212 | 2325 | C | G | 4   | 5  | -- | -- |
| CakTC22884 | Ca(ICC2/PI489777)SNP_07213 | 1170 | A | G | 11  | 5  | -- | -- |
| CakTC29577 | Ca(ICC2/PI489777)SNP_07214 | 180  | G | A | 22  | 15 | -- | -- |
|            | Ca(ICC2/PI489777)SNP_07215 | 373  | A | C | 20  | 11 | -- | -- |
|            | Ca(ICC2/PI489777)SNP_07216 | 707  | A | G | 9   | 3  | -- | -- |
| CakTC07192 | Ca(ICC2/PI489777)SNP_07217 | 872  | G | A | 11  | 6  | -- | -- |
|            | Ca(ICC2/PI489777)SNP_07218 | 1235 | A | G | 11  | 3  | -- | -- |
|            | Ca(ICC2/PI489777)SNP_07219 | 1590 | G | A | 12  | 6  | -- | -- |
|            | Ca(ICC2/PI489777)SNP_07220 | 1749 | T | C | 9   | 4  | -- | -- |
|            | Ca(ICC2/PI489777)SNP_07221 | 1794 | A | T | 6   | 4  | -- | -- |
| CakTC29570 | Ca(ICC2/PI489777)SNP_07222 | 1093 | T | A | 128 | 73 | -- | -- |
| CakTC30000 | Ca(ICC2/PI489777)SNP_07223 | 1419 | C | T | 11  | 14 | -- | -- |
|            | Ca(ICC2/PI489777)SNP_07224 | 2103 | A | G | 6   | 4  | -- | -- |
| CakTC40816 | Ca(ICC2/PI489777)SNP_07225 | 391  | G | A | 4   | 5  | -- | -- |
|            | Ca(ICC2/PI489777)SNP_07226 | 515  | A | T | 5   | 4  | -- | -- |
| CakTC38025 | Ca(ICC2/PI489777)SNP_07227 | 450  | C | T | 8   | 16 | -- | -- |
|            | Ca(ICC2/PI489777)SNP_07228 | 467  | A | G | 8   | 11 | -- | -- |
|            | Ca(ICC2/PI489777)SNP_07229 | 690  | A | C | 3   | 9  | -- | -- |
|            | Ca(ICC2/PI489777)SNP_07230 | 961  | A | G | 5   | 4  | -- | -- |
|            | Ca(ICC2/PI489777)SNP_07231 | 991  | A | G | 4   | 3  | -- | -- |
|            | Ca(ICC2/PI489777)SNP_07232 | 1016 | T | A | 4   | 3  | -- | -- |
| CakTC29055 | Ca(ICC2/PI489777)SNP_07233 | 386  | A | G | 17  | 8  | -- | -- |
|            | Ca(ICC2/PI489777)SNP_07234 | 751  | C | T | 9   | 13 | -- | -- |
|            | Ca(ICC2/PI489777)SNP_07235 | 905  | G | T | 34  | 11 | -- | -- |
|            | Ca(ICC2/PI489777)SNP_07236 | 1068 | G | A | 43  | 9  | -- | -- |
|            | Ca(ICC2/PI489777)SNP_07237 | 1115 | A | G | 41  | 7  | -- | -- |
|            | Ca(ICC2/PI489777)SNP_07238 | 1324 | A | T | 16  | 8  | -- | -- |
|            | Ca(ICC2/PI489777)SNP_07239 | 1346 | C | T | 17  | 7  | -- | -- |
|            | Ca(ICC2/PI489777)SNP_07240 | 1556 | A | G | 16  | 13 | -- | -- |
|            | Ca(ICC2/PI489777)SNP_07241 | 1586 | C | T | 14  | 12 | -- | -- |
|            | Ca(ICC2/PI489777)SNP_07242 | 1639 | T | C | 16  | 10 | -- | -- |
|            | Ca(ICC2/PI489777)SNP_07243 | 1641 | A | C | 15  | 11 | -- | -- |
|            | Ca(ICC2/PI489777)SNP_07244 | 1793 | T | C | 9   | 6  | -- | -- |
|            | Ca(ICC2/PI489777)SNP_07245 | 1910 | C | T | 6   | 3  | -- | -- |
|            | Ca(ICC2/PI489777)SNP_07246 | 2018 | T | C | 4   | 3  | -- | -- |
|            | Ca(ICC2/PI489777)SNP_07247 | 2095 | G | A | 4   | 3  | -- | -- |

|            |                            |      |   |   |     |    |        |       |
|------------|----------------------------|------|---|---|-----|----|--------|-------|
|            | Ca(ICC2/P1489777)SNP_07248 | 2111 | G | A | 4   | 3  | --     | --    |
|            | Ca(ICC2/P1489777)SNP_07249 | 2169 | C | T | 4   | 3  | --     | --    |
| CakTC23889 | Ca(ICC2/P1489777)SNP_07250 | 530  | C | G | 10  | 4  | Flower | bud   |
|            | Ca(ICC2/P1489777)SNP_07251 | 537  | T | C | 12  | 3  | Flower | bud   |
|            | Ca(ICC2/P1489777)SNP_07252 | 579  | T | G | 12  | 4  | Flower | bud   |
| CakTC39681 | Ca(ICC2/P1489777)SNP_07253 | 139  | G | T | 8   | 8  | --     | --    |
|            | Ca(ICC2/P1489777)SNP_07254 | 960  | A | T | 27  | 9  | --     | --    |
|            | Ca(ICC2/P1489777)SNP_07255 | 972  | T | C | 27  | 9  | --     | --    |
|            | Ca(ICC2/P1489777)SNP_07256 | 1344 | C | G | 6   | 7  | --     | --    |
| CakTC41286 | Ca(ICC2/P1489777)SNP_07257 | 422  | G | A | 3   | 11 | --     | --    |
| CakTC29851 | Ca(ICC2/P1489777)SNP_07258 | 1116 | T | C | 21  | 14 | --     | --    |
|            | Ca(ICC2/P1489777)SNP_07259 | 1170 | T | G | 17  | 12 | --     | --    |
|            | Ca(ICC2/P1489777)SNP_07260 | 2024 | C | A | 17  | 15 | --     | --    |
|            | Ca(ICC2/P1489777)SNP_07261 | 2065 | A | T | 26  | 14 | --     | --    |
|            | Ca(ICC2/P1489777)SNP_07262 | 2268 | G | A | 8   | 6  | --     | --    |
|            | Ca(ICC2/P1489777)SNP_07263 | 2361 | C | T | 9   | 5  | --     | --    |
|            | Ca(ICC2/P1489777)SNP_07264 | 2421 | C | T | 6   | 4  | --     | --    |
| CakTC43365 | Ca(ICC2/P1489777)SNP_07265 | 1549 | G | A | 9   | 7  | --     | --    |
|            | Ca(ICC2/P1489777)SNP_07266 | 1747 | A | G | 8   | 3  | --     | --    |
| CakTC39869 | Ca(ICC2/P1489777)SNP_07267 | 854  | C | T | 39  | 27 | --     | --    |
|            | Ca(ICC2/P1489777)SNP_07268 | 913  | T | C | 40  | 24 | --     | --    |
|            | Ca(ICC2/P1489777)SNP_07269 | 973  | T | C | 34  | 18 | --     | --    |
| CakTC11435 | Ca(ICC2/P1489777)SNP_07270 | 410  | C | T | 4   | 5  | Root   | --    |
|            | Ca(ICC2/P1489777)SNP_07271 | 413  | A | C | 4   | 5  | Root   | --    |
|            | Ca(ICC2/P1489777)SNP_07272 | 480  | A | G | 3   | 5  | Root   | --    |
|            | Ca(ICC2/P1489777)SNP_07273 | 489  | G | A | 3   | 5  | Root   | --    |
|            | Ca(ICC2/P1489777)SNP_07274 | 492  | T | C | 3   | 5  | Root   | --    |
|            | Ca(ICC2/P1489777)SNP_07275 | 541  | G | A | 3   | 9  | Root   | --    |
|            | Ca(ICC2/P1489777)SNP_07276 | 597  | A | G | 3   | 11 | Root   | --    |
|            | Ca(ICC2/P1489777)SNP_07277 | 606  | A | G | 3   | 10 | Root   | --    |
|            | Ca(ICC2/P1489777)SNP_07278 | 608  | A | T | 3   | 10 | Root   | --    |
|            | Ca(ICC2/P1489777)SNP_07279 | 1392 | T | C | 3   | 3  | Root   | --    |
|            | Ca(ICC2/P1489777)SNP_07280 | 1419 | A | T | 3   | 3  | Root   | --    |
| CakTC27906 | Ca(ICC2/P1489777)SNP_07281 | 2599 | G | T | 9   | 4  | Shoot  | --    |
|            | Ca(ICC2/P1489777)SNP_07282 | 2605 | G | C | 9   | 5  | Shoot  | --    |
| CakTC43199 | Ca(ICC2/P1489777)SNP_07283 | 120  | T | A | 4   | 5  | --     | --    |
|            | Ca(ICC2/P1489777)SNP_07284 | 151  | G | T | 6   | 5  | --     | --    |
|            | Ca(ICC2/P1489777)SNP_07285 | 181  | C | G | 5   | 5  | --     | --    |
|            | Ca(ICC2/P1489777)SNP_07286 | 1349 | G | A | 6   | 7  | --     | --    |
| CakTC22842 | Ca(ICC2/P1489777)SNP_07287 | 546  | T | A | 8   | 11 | --     | --    |
|            | Ca(ICC2/P1489777)SNP_07288 | 972  | C | T | 19  | 3  | --     | --    |
| CakTC27601 | Ca(ICC2/P1489777)SNP_07289 | 1203 | A | C | 23  | 16 | --     | --    |
| CakTC30692 | Ca(ICC2/P1489777)SNP_07290 | 2069 | T | C | 16  | 8  | Flower | bud   |
|            | Ca(ICC2/P1489777)SNP_07291 | 2171 | G | A | 12  | 8  | Flower | bud   |
|            | Ca(ICC2/P1489777)SNP_07292 | 2363 | T | C | 5   | 9  | Flower | bud   |
|            | Ca(ICC2/P1489777)SNP_07293 | 2749 | C | A | 9   | 4  | Flower | bud   |
| CakTC41985 | Ca(ICC2/P1489777)SNP_07294 | 990  | T | C | 11  | 4  | --     | --    |
|            | Ca(ICC2/P1489777)SNP_07295 | 1056 | T | G | 10  | 4  | --     | --    |
|            | Ca(ICC2/P1489777)SNP_07296 | 1089 | C | T | 10  | 4  | --     | --    |
|            | Ca(ICC2/P1489777)SNP_07297 | 1204 | A | C | 7   | 3  | --     | --    |
| CakTC39088 | Ca(ICC2/P1489777)SNP_07298 | 561  | C | A | 12  | 4  | --     | --    |
|            | Ca(ICC2/P1489777)SNP_07299 | 625  | C | T | 18  | 11 | --     | --    |
| CakTC28041 | Ca(ICC2/P1489777)SNP_07300 | 203  | T | C | 10  | 5  | --     | --    |
| CakTC39106 | Ca(ICC2/P1489777)SNP_07301 | 540  | A | G | 16  | 7  | Flower | bud   |
| CakTC27832 | Ca(ICC2/P1489777)SNP_07302 | 184  | C | A | 14  | 4  | --     | --    |
|            | Ca(ICC2/P1489777)SNP_07303 | 214  | T | C | 13  | 5  | --     | --    |
| CakTC41880 | Ca(ICC2/P1489777)SNP_07304 | 499  | A | G | 10  | 16 | --     | --    |
| CakTC22939 | Ca(ICC2/P1489777)SNP_07305 | 2236 | T | G | 193 | 67 | --     | --    |
|            | Ca(ICC2/P1489777)SNP_07306 | 2395 | G | A | 189 | 71 | --     | --    |
|            | Ca(ICC2/P1489777)SNP_07307 | 2404 | G | A | 184 | 72 | --     | --    |
|            | Ca(ICC2/P1489777)SNP_07308 | 2443 | C | T | 221 | 82 | --     | --    |
| CakTC37352 | Ca(ICC2/P1489777)SNP_07309 | 684  | C | T | 17  | 3  | --     | --    |
|            | Ca(ICC2/P1489777)SNP_07310 | 999  | A | T | 11  | 10 | --     | --    |
| CakTC40904 | Ca(ICC2/P1489777)SNP_07311 | 195  | A | G | 12  | 5  | --     | PLATZ |
| CakTC37652 | Ca(ICC2/P1489777)SNP_07312 | 410  | G | A | 11  | 13 | --     | --    |
|            | Ca(ICC2/P1489777)SNP_07313 | 884  | T | C | 4   | 10 | --     | --    |
|            | Ca(ICC2/P1489777)SNP_07314 | 1334 | T | C | 22  | 5  | --     | --    |
|            | Ca(ICC2/P1489777)SNP_07315 | 1415 | A | G | 24  | 4  | --     | --    |
|            | Ca(ICC2/P1489777)SNP_07316 | 1583 | G | A | 7   | 4  | --     | --    |
| CakTC38076 | Ca(ICC2/P1489777)SNP_07317 | 1035 | G | A | 6   | 3  | --     | HB    |
| CakTC23383 | Ca(ICC2/P1489777)SNP_07318 | 679  | A | G | 20  | 6  | --     | bHLH  |
|            | Ca(ICC2/P1489777)SNP_07319 | 1048 | G | A | 28  | 10 | --     | bHLH  |
|            | Ca(ICC2/P1489777)SNP_07320 | 1050 | C | T | 28  | 11 | --     | bHLH  |
| CakTC40247 | Ca(ICC2/P1489777)SNP_07321 | 533  | C | T | 11  | 12 | --     | --    |

|            |                            |      |   |   |    |    |      |           |
|------------|----------------------------|------|---|---|----|----|------|-----------|
|            | Ca(ICC2/PI489777)SNP_07322 | 986  | A | G | 5  | 5  | --   | --        |
| CakTC41145 | Ca(ICC2/PI489777)SNP_07323 | 314  | T | G | 16 | 7  | --   | --        |
|            | Ca(ICC2/PI489777)SNP_07324 | 329  | G | C | 18 | 7  | --   | --        |
|            | Ca(ICC2/PI489777)SNP_07325 | 332  | G | C | 16 | 6  | --   | --        |
|            | Ca(ICC2/PI489777)SNP_07326 | 972  | T | C | 29 | 4  | --   | --        |
|            | Ca(ICC2/PI489777)SNP_07327 | 1372 | T | A | 28 | 9  | --   | --        |
|            | Ca(ICC2/PI489777)SNP_07328 | 1422 | A | G | 25 | 9  | --   | --        |
|            | Ca(ICC2/PI489777)SNP_07329 | 1477 | A | G | 25 | 8  | --   | --        |
|            | Ca(ICC2/PI489777)SNP_07330 | 1565 | G | A | 28 | 8  | --   | --        |
|            | Ca(ICC2/PI489777)SNP_07331 | 2136 | G | A | 17 | 5  | --   | --        |
| CakTC32409 | Ca(ICC2/PI489777)SNP_07332 | 346  | G | T | 6  | 3  | --   | --        |
|            | Ca(ICC2/PI489777)SNP_07333 | 349  | C | T | 6  | 3  | --   | --        |
|            | Ca(ICC2/PI489777)SNP_07334 | 375  | G | T | 6  | 3  | --   | --        |
|            | Ca(ICC2/PI489777)SNP_07335 | 4879 | T | G | 8  | 5  | --   | --        |
|            | Ca(ICC2/PI489777)SNP_07336 | 5320 | G | A | 8  | 3  | --   | --        |
|            | Ca(ICC2/PI489777)SNP_07337 | 5638 | G | A | 7  | 8  | --   | --        |
|            | Ca(ICC2/PI489777)SNP_07338 | 5830 | G | A | 8  | 7  | --   | --        |
|            | Ca(ICC2/PI489777)SNP_07339 | 6136 | A | G | 5  | 5  | --   | --        |
| CakTC30454 | Ca(ICC2/PI489777)SNP_07340 | 2590 | T | C | 83 | 88 | --   | --        |
| CakTC42069 | Ca(ICC2/PI489777)SNP_07341 | 423  | A | T | 5  | 6  | --   | AP2-EREBP |
|            | Ca(ICC2/PI489777)SNP_07342 | 529  | C | T | 7  | 5  | --   | AP2-EREBP |
| CakTC27730 | Ca(ICC2/PI489777)SNP_07343 | 411  | C | T | 5  | 3  | --   | --        |
|            | Ca(ICC2/PI489777)SNP_07344 | 507  | A | G | 4  | 4  | --   | --        |
|            | Ca(ICC2/PI489777)SNP_07345 | 584  | A | G | 7  | 3  | --   | --        |
| CakTC38818 | Ca(ICC2/PI489777)SNP_07346 | 1432 | T | C | 4  | 7  | --   | --        |
| CakTC26759 | Ca(ICC2/PI489777)SNP_07347 | 126  | T | C | 7  | 6  | --   | --        |
|            | Ca(ICC2/PI489777)SNP_07348 | 307  | A | C | 13 | 11 | --   | --        |
|            | Ca(ICC2/PI489777)SNP_07349 | 308  | C | T | 13 | 11 | --   | --        |
|            | Ca(ICC2/PI489777)SNP_07350 | 444  | T | C | 13 | 10 | --   | --        |
| CakTC23004 | Ca(ICC2/PI489777)SNP_07351 | 151  | T | G | 14 | 13 | --   | --        |
|            | Ca(ICC2/PI489777)SNP_07352 | 786  | G | C | 35 | 13 | --   | --        |
|            | Ca(ICC2/PI489777)SNP_07353 | 1021 | C | T | 32 | 8  | --   | --        |
|            | Ca(ICC2/PI489777)SNP_07354 | 1120 | T | A | 29 | 6  | --   | --        |
| CakTC32200 | Ca(ICC2/PI489777)SNP_07355 | 895  | A | G | 8  | 5  | --   | Trihelix  |
|            | Ca(ICC2/PI489777)SNP_07356 | 1183 | T | C | 7  | 6  | --   | Trihelix  |
|            | Ca(ICC2/PI489777)SNP_07357 | 1315 | A | G | 13 | 8  | --   | Trihelix  |
| CakTC32728 | Ca(ICC2/PI489777)SNP_07358 | 187  | T | C | 9  | 3  | --   | --        |
|            | Ca(ICC2/PI489777)SNP_07359 | 384  | T | G | 20 | 7  | --   | --        |
|            | Ca(ICC2/PI489777)SNP_07360 | 405  | G | C | 23 | 11 | --   | --        |
|            | Ca(ICC2/PI489777)SNP_07361 | 432  | G | T | 24 | 10 | --   | --        |
|            | Ca(ICC2/PI489777)SNP_07362 | 587  | A | G | 22 | 22 | --   | --        |
|            | Ca(ICC2/PI489777)SNP_07363 | 798  | C | T | 21 | 25 | --   | --        |
|            | Ca(ICC2/PI489777)SNP_07364 | 1146 | A | G | 23 | 19 | --   | --        |
|            | Ca(ICC2/PI489777)SNP_07365 | 1308 | G | A | 27 | 16 | --   | --        |
|            | Ca(ICC2/PI489777)SNP_07366 | 1325 | C | T | 25 | 15 | --   | --        |
|            | Ca(ICC2/PI489777)SNP_07367 | 1569 | G | T | 15 | 13 | --   | --        |
|            | Ca(ICC2/PI489777)SNP_07368 | 1625 | C | T | 12 | 12 | --   | --        |
|            | Ca(ICC2/PI489777)SNP_07369 | 1725 | G | A | 10 | 12 | --   | --        |
|            | Ca(ICC2/PI489777)SNP_07370 | 1815 | A | G | 17 | 14 | --   | --        |
|            | Ca(ICC2/PI489777)SNP_07371 | 1826 | A | T | 16 | 17 | --   | --        |
|            | Ca(ICC2/PI489777)SNP_07372 | 1959 | G | C | 16 | 15 | --   | --        |
| CakTC32997 | Ca(ICC2/PI489777)SNP_07373 | 1930 | T | G | 25 | 6  | --   | --        |
|            | Ca(ICC2/PI489777)SNP_07374 | 2065 | C | T | 23 | 6  | --   | --        |
|            | Ca(ICC2/PI489777)SNP_07375 | 2074 | A | G | 22 | 6  | --   | --        |
|            | Ca(ICC2/PI489777)SNP_07376 | 2442 | G | C | 14 | 10 | --   | --        |
| CakTC26929 | Ca(ICC2/PI489777)SNP_07377 | 502  | A | T | 6  | 19 | Root | --        |
|            | Ca(ICC2/PI489777)SNP_07378 | 541  | A | C | 6  | 16 | Root | --        |
|            | Ca(ICC2/PI489777)SNP_07379 | 558  | G | A | 6  | 15 | Root | --        |
|            | Ca(ICC2/PI489777)SNP_07380 | 898  | C | T | 3  | 28 | Root | --        |
|            | Ca(ICC2/PI489777)SNP_07381 | 1043 | G | C | 3  | 25 | Root | --        |
|            | Ca(ICC2/PI489777)SNP_07382 | 1256 | C | T | 3  | 24 | Root | --        |
|            | Ca(ICC2/PI489777)SNP_07383 | 1552 | A | T | 4  | 11 | Root | --        |
|            | Ca(ICC2/PI489777)SNP_07384 | 1571 | T | G | 4  | 8  | Root | --        |
| CakTC27040 | Ca(ICC2/PI489777)SNP_07385 | 312  | A | G | 7  | 12 | --   | --        |
| CakTC32963 | Ca(ICC2/PI489777)SNP_07386 | 189  | C | G | 6  | 4  | --   | --        |
|            | Ca(ICC2/PI489777)SNP_07387 | 1355 | G | A | 6  | 4  | --   | --        |
|            | Ca(ICC2/PI489777)SNP_07388 | 1549 | C | T | 7  | 3  | --   | --        |
|            | Ca(ICC2/PI489777)SNP_07389 | 3737 | G | A | 8  | 9  | --   | --        |
| CakTC34272 | Ca(ICC2/PI489777)SNP_07390 | 1903 | A | C | 4  | 11 | --   | --        |
| CakTC37904 | Ca(ICC2/PI489777)SNP_07391 | 132  | T | C | 4  | 3  | --   | --        |
| CakTC24337 | Ca(ICC2/PI489777)SNP_07392 | 1142 | G | A | 21 | 10 | --   | --        |
|            | Ca(ICC2/PI489777)SNP_07393 | 1229 | C | T | 10 | 8  | --   | --        |
| CakTC29286 | Ca(ICC2/PI489777)SNP_07394 | 182  | T | G | 5  | 4  | --   | --        |
|            | Ca(ICC2/PI489777)SNP_07395 | 443  | A | G | 13 | 9  | --   | --        |

|            |                            |      |   |   |     |    |           |      |
|------------|----------------------------|------|---|---|-----|----|-----------|------|
|            | Ca(ICC2/PI489777)SNP_07396 | 587  | C | T | 13  | 10 | --        | --   |
|            | Ca(ICC2/PI489777)SNP_07397 | 593  | A | G | 13  | 10 | --        | --   |
|            | Ca(ICC2/PI489777)SNP_07398 | 1148 | C | T | 16  | 5  | --        | --   |
|            | Ca(ICC2/PI489777)SNP_07399 | 1624 | A | G | 5   | 3  | --        | --   |
| CakTC24068 | Ca(ICC2/PI489777)SNP_07400 | 99   | A | C | 98  | 34 | --        | --   |
|            | Ca(ICC2/PI489777)SNP_07401 | 748  | T | C | 19  | 4  | --        | --   |
|            | Ca(ICC2/PI489777)SNP_07402 | 751  | G | A | 18  | 4  | --        | --   |
| CakTC39540 | Ca(ICC2/PI489777)SNP_07403 | 901  | G | A | 21  | 5  | --        | --   |
|            | Ca(ICC2/PI489777)SNP_07404 | 1017 | G | A | 9   | 7  | --        | --   |
| CakTC31050 | Ca(ICC2/PI489777)SNP_07405 | 1107 | G | A | 4   | 3  | Flower    | bud  |
| CakTC13722 | Ca(ICC2/PI489777)SNP_07406 | 1049 | A | G | 34  | 18 | --        | --   |
|            | Ca(ICC2/PI489777)SNP_07407 | 1307 | T | G | 76  | 36 | --        | --   |
|            | Ca(ICC2/PI489777)SNP_07408 | 1752 | G | A | 35  | 15 | --        | --   |
| CakTC32355 | Ca(ICC2/PI489777)SNP_07409 | 921  | T | C | 9   | 12 | --        | --   |
| CakTC40624 | Ca(ICC2/PI489777)SNP_07410 | 683  | T | A | 11  | 3  | --        | --   |
| CakTC34705 | Ca(ICC2/PI489777)SNP_07411 | 420  | C | T | 30  | 33 | --        | --   |
|            | Ca(ICC2/PI489777)SNP_07412 | 1830 | C | T | 30  | 18 | --        | --   |
|            | Ca(ICC2/PI489777)SNP_07413 | 1971 | A | C | 24  | 21 | --        | --   |
|            | Ca(ICC2/PI489777)SNP_07414 | 3610 | T | A | 6   | 7  | --        | --   |
|            | Ca(ICC2/PI489777)SNP_07415 | 3611 | C | T | 6   | 7  | --        | --   |
|            | Ca(ICC2/PI489777)SNP_07416 | 3661 | C | T | 3   | 5  | --        | --   |
| CakTC10548 | Ca(ICC2/PI489777)SNP_07417 | 293  | T | A | 29  | 18 | --        | --   |
|            | Ca(ICC2/PI489777)SNP_07418 | 421  | T | A | 64  | 48 | --        | --   |
|            | Ca(ICC2/PI489777)SNP_07419 | 580  | G | C | 69  | 43 | --        | --   |
|            | Ca(ICC2/PI489777)SNP_07420 | 636  | T | C | 52  | 44 | --        | --   |
|            | Ca(ICC2/PI489777)SNP_07421 | 645  | A | C | 46  | 42 | --        | --   |
| CakTC25244 | Ca(ICC2/PI489777)SNP_07422 | 715  | A | C | 6   | 4  | --        | --   |
|            | Ca(ICC2/PI489777)SNP_07423 | 744  | G | C | 6   | 5  | --        | --   |
|            | Ca(ICC2/PI489777)SNP_07424 | 1120 | A | G | 9   | 8  | --        | --   |
|            | Ca(ICC2/PI489777)SNP_07425 | 1528 | C | G | 25  | 9  | --        | --   |
|            | Ca(ICC2/PI489777)SNP_07426 | 1952 | A | G | 10  | 3  | --        | --   |
| CakTC26199 | Ca(ICC2/PI489777)SNP_07427 | 850  | A | G | 36  | 17 | --        | --   |
|            | Ca(ICC2/PI489777)SNP_07428 | 857  | C | G | 44  | 19 | --        | --   |
|            | Ca(ICC2/PI489777)SNP_07429 | 868  | A | G | 44  | 21 | --        | --   |
|            | Ca(ICC2/PI489777)SNP_07430 | 877  | G | A | 54  | 21 | --        | --   |
|            | Ca(ICC2/PI489777)SNP_07431 | 914  | C | T | 63  | 19 | --        | --   |
|            | Ca(ICC2/PI489777)SNP_07432 | 928  | G | A | 68  | 21 | --        | --   |
|            | Ca(ICC2/PI489777)SNP_07433 | 937  | G | T | 70  | 20 | --        | --   |
|            | Ca(ICC2/PI489777)SNP_07434 | 939  | A | C | 66  | 19 | --        | --   |
|            | Ca(ICC2/PI489777)SNP_07435 | 977  | T | C | 70  | 27 | --        | --   |
| CakTC29025 | Ca(ICC2/PI489777)SNP_07436 | 324  | T | A | 9   | 13 | --        | HB   |
|            | Ca(ICC2/PI489777)SNP_07437 | 934  | G | C | 3   | 5  | --        | HB   |
| CakTC31995 | Ca(ICC2/PI489777)SNP_07438 | 700  | T | C | 3   | 3  | --        | --   |
| CakTC32696 | Ca(ICC2/PI489777)SNP_07439 | 405  | A | T | 4   | 4  | --        | CCHC |
|            | Ca(ICC2/PI489777)SNP_07440 | 1621 | G | A | 5   | 3  | --        | CCHC |
|            | Ca(ICC2/PI489777)SNP_07441 | 1827 | C | A | 9   | 3  | --        | CCHC |
| CakTC40549 | Ca(ICC2/PI489777)SNP_07442 | 312  | T | C | 4   | 7  | Young_pod | --   |
|            | Ca(ICC2/PI489777)SNP_07443 | 345  | G | A | 5   | 8  | Young_pod | --   |
| CakTC27304 | Ca(ICC2/PI489777)SNP_07444 | 94   | G | C | 12  | 5  | --        | --   |
|            | Ca(ICC2/PI489777)SNP_07445 | 924  | C | G | 26  | 16 | --        | --   |
|            | Ca(ICC2/PI489777)SNP_07446 | 1057 | C | T | 19  | 13 | --        | --   |
|            | Ca(ICC2/PI489777)SNP_07447 | 1237 | T | C | 12  | 5  | --        | --   |
|            | Ca(ICC2/PI489777)SNP_07448 | 1474 | A | T | 6   | 4  | --        | --   |
| CakTC30176 | Ca(ICC2/PI489777)SNP_07449 | 92   | C | T | 6   | 4  | --        | --   |
|            | Ca(ICC2/PI489777)SNP_07450 | 156  | C | G | 9   | 5  | --        | --   |
|            | Ca(ICC2/PI489777)SNP_07451 | 225  | G | T | 9   | 6  | --        | --   |
|            | Ca(ICC2/PI489777)SNP_07452 | 595  | T | C | 7   | 5  | --        | --   |
|            | Ca(ICC2/PI489777)SNP_07453 | 603  | G | T | 7   | 5  | --        | --   |
| CakTC33050 | Ca(ICC2/PI489777)SNP_07454 | 518  | A | C | 106 | 39 | --        | --   |
|            | Ca(ICC2/PI489777)SNP_07455 | 1677 | C | T | 105 | 44 | --        | --   |
|            | Ca(ICC2/PI489777)SNP_07456 | 1964 | T | G | 145 | 39 | --        | --   |
|            | Ca(ICC2/PI489777)SNP_07457 | 2820 | A | C | 85  | 25 | --        | --   |
|            | Ca(ICC2/PI489777)SNP_07458 | 2901 | G | T | 29  | 8  | --        | --   |
| CakTC34812 | Ca(ICC2/PI489777)SNP_07459 | 277  | A | G | 7   | 11 | --        | --   |
|            | Ca(ICC2/PI489777)SNP_07460 | 322  | T | C | 9   | 10 | --        | --   |
|            | Ca(ICC2/PI489777)SNP_07461 | 1174 | C | T | 24  | 9  | --        | --   |
|            | Ca(ICC2/PI489777)SNP_07462 | 1231 | T | C | 29  | 17 | --        | --   |
|            | Ca(ICC2/PI489777)SNP_07463 | 1873 | T | C | 13  | 12 | --        | --   |
|            | Ca(ICC2/PI489777)SNP_07464 | 2686 | C | T | 26  | 13 | --        | --   |
|            | Ca(ICC2/PI489777)SNP_07465 | 2767 | A | G | 23  | 10 | --        | --   |
|            | Ca(ICC2/PI489777)SNP_07466 | 3247 | C | T | 12  | 17 | --        | --   |
|            | Ca(ICC2/PI489777)SNP_07467 | 3273 | T | C | 18  | 20 | --        | --   |
| CakTC32841 | Ca(ICC2/PI489777)SNP_07468 | 520  | T | C | 19  | 7  | --        | --   |
|            | Ca(ICC2/PI489777)SNP_07469 | 570  | G | A | 21  | 4  | --        | --   |

|            |                            |      |   |   |    |    |           |      |
|------------|----------------------------|------|---|---|----|----|-----------|------|
|            | Ca(ICC2/PI489777)SNP_07470 | 619  | G | T | 27 | 5  | --        | --   |
|            | Ca(ICC2/PI489777)SNP_07471 | 882  | G | A | 18 | 14 | --        | --   |
|            | Ca(ICC2/PI489777)SNP_07472 | 1486 | A | G | 9  | 9  | --        | --   |
|            | Ca(ICC2/PI489777)SNP_07473 | 1587 | T | A | 5  | 10 | --        | --   |
|            | Ca(ICC2/PI489777)SNP_07474 | 1694 | C | T | 9  | 5  | --        | --   |
|            | Ca(ICC2/PI489777)SNP_07475 | 1983 | A | C | 10 | 9  | --        | --   |
|            | Ca(ICC2/PI489777)SNP_07476 | 2062 | C | T | 8  | 8  | --        | --   |
|            | Ca(ICC2/PI489777)SNP_07477 | 2070 | G | A | 8  | 8  | --        | --   |
|            | Ca(ICC2/PI489777)SNP_07478 | 2090 | G | T | 8  | 8  | --        | --   |
|            | Ca(ICC2/PI489777)SNP_07479 | 2299 | A | G | 10 | 7  | --        | --   |
|            | Ca(ICC2/PI489777)SNP_07480 | 2412 | G | A | 14 | 8  | --        | --   |
|            | Ca(ICC2/PI489777)SNP_07481 | 2625 | G | A | 14 | 8  | --        | --   |
| CakTC10062 | Ca(ICC2/PI489777)SNP_07482 | 2946 | T | C | 17 | 3  | Young_pod | --   |
|            | Ca(ICC2/PI489777)SNP_07483 | 3091 | A | G | 18 | 7  | Young_pod | --   |
| CakTC37723 | Ca(ICC2/PI489777)SNP_07484 | 540  | A | G | 31 | 10 | Flower    | bud  |
|            | Ca(ICC2/PI489777)SNP_07485 | 804  | T | C | 22 | 4  | Flower    | bud  |
|            | Ca(ICC2/PI489777)SNP_07486 | 1276 | T | C | 9  | 9  | Flower    | bud  |
|            | Ca(ICC2/PI489777)SNP_07487 | 1416 | C | T | 9  | 12 | Flower    | bud  |
|            | Ca(ICC2/PI489777)SNP_07488 | 1497 | C | T | 9  | 7  | Flower    | bud  |
| CakTC38625 | Ca(ICC2/PI489777)SNP_07489 | 169  | G | T | 6  | 3  | --        | --   |
|            | Ca(ICC2/PI489777)SNP_07490 | 405  | T | C | 11 | 3  | --        | --   |
|            | Ca(ICC2/PI489777)SNP_07491 | 858  | C | T | 12 | 3  | --        | --   |
| CakTC38181 | Ca(ICC2/PI489777)SNP_07492 | 849  | A | G | 7  | 5  | --        | --   |
|            | Ca(ICC2/PI489777)SNP_07493 | 1055 | G | A | 7  | 8  | --        | --   |
|            | Ca(ICC2/PI489777)SNP_07494 | 1072 | G | A | 7  | 9  | --        | --   |
|            | Ca(ICC2/PI489777)SNP_07495 | 1798 | G | A | 11 | 3  | --        | --   |
| CakTC11437 | Ca(ICC2/PI489777)SNP_07496 | 286  | T | C | 8  | 5  | --        | --   |
| CakTC28329 | Ca(ICC2/PI489777)SNP_07497 | 1636 | G | A | 12 | 3  | --        | --   |
| CakTC37490 | Ca(ICC2/PI489777)SNP_07498 | 1003 | G | A | 20 | 15 | --        | --   |
| CakTC39968 | Ca(ICC2/PI489777)SNP_07499 | 199  | A | G | 21 | 11 | --        | MED7 |
|            | Ca(ICC2/PI489777)SNP_07500 | 308  | C | G | 25 | 11 | --        | MED7 |
|            | Ca(ICC2/PI489777)SNP_07501 | 319  | G | C | 26 | 13 | --        | MED7 |
|            | Ca(ICC2/PI489777)SNP_07502 | 435  | G | A | 30 | 7  | --        | MED7 |
|            | Ca(ICC2/PI489777)SNP_07503 | 517  | G | A | 21 | 10 | --        | MED7 |
|            | Ca(ICC2/PI489777)SNP_07504 | 574  | C | T | 21 | 16 | --        | MED7 |
|            | Ca(ICC2/PI489777)SNP_07505 | 601  | A | G | 18 | 14 | --        | MED7 |
|            | Ca(ICC2/PI489777)SNP_07506 | 682  | G | A | 18 | 14 | --        | MED7 |
|            | Ca(ICC2/PI489777)SNP_07507 | 793  | G | A | 17 | 8  | --        | MED7 |
|            | Ca(ICC2/PI489777)SNP_07508 | 817  | C | T | 14 | 4  | --        | MED7 |
|            | Ca(ICC2/PI489777)SNP_07509 | 931  | A | G | 11 | 3  | --        | MED7 |
| CakTC38534 | Ca(ICC2/PI489777)SNP_07510 | 122  | T | C | 12 | 11 | --        | --   |
|            | Ca(ICC2/PI489777)SNP_07511 | 237  | G | A | 13 | 11 | --        | --   |
|            | Ca(ICC2/PI489777)SNP_07512 | 597  | C | T | 11 | 4  | --        | --   |
|            | Ca(ICC2/PI489777)SNP_07513 | 663  | T | G | 15 | 8  | --        | --   |
|            | Ca(ICC2/PI489777)SNP_07514 | 756  | T | G | 13 | 8  | --        | --   |
|            | Ca(ICC2/PI489777)SNP_07515 | 801  | A | G | 11 | 10 | --        | --   |
|            | Ca(ICC2/PI489777)SNP_07516 | 865  | C | G | 9  | 10 | --        | --   |
| CakTC24708 | Ca(ICC2/PI489777)SNP_07517 | 1466 | C | T | 43 | 9  | --        | --   |
|            | Ca(ICC2/PI489777)SNP_07518 | 2724 | C | T | 42 | 5  | --        | --   |
| CakTC42783 | Ca(ICC2/PI489777)SNP_07519 | 463  | G | A | 3  | 3  | --        | --   |
| CakTC30548 | Ca(ICC2/PI489777)SNP_07520 | 879  | C | T | 8  | 4  | Young_pod | --   |
|            | Ca(ICC2/PI489777)SNP_07521 | 1149 | C | T | 17 | 6  | Young_pod | --   |
|            | Ca(ICC2/PI489777)SNP_07522 | 1768 | G | A | 16 | 8  | Young_pod | --   |
|            | Ca(ICC2/PI489777)SNP_07523 | 2554 | G | A | 9  | 4  | Young_pod | --   |
|            | Ca(ICC2/PI489777)SNP_07524 | 2931 | C | T | 6  | 4  | Young_pod | --   |
|            | Ca(ICC2/PI489777)SNP_07525 | 3282 | T | G | 8  | 5  | Young_pod | --   |
|            | Ca(ICC2/PI489777)SNP_07526 | 3630 | T | C | 6  | 5  | Young_pod | --   |
|            | Ca(ICC2/PI489777)SNP_07527 | 3762 | A | T | 5  | 3  | Young_pod | --   |
|            | Ca(ICC2/PI489777)SNP_07528 | 3816 | C | T | 3  | 5  | Young_pod | --   |
| CakTC41405 | Ca(ICC2/PI489777)SNP_07529 | 2215 | C | T | 19 | 19 | --        | --   |
| CakTC23398 | Ca(ICC2/PI489777)SNP_07530 | 567  | A | G | 33 | 12 | --        | --   |
|            | Ca(ICC2/PI489777)SNP_07531 | 576  | T | C | 40 | 12 | --        | --   |
|            | Ca(ICC2/PI489777)SNP_07532 | 873  | C | T | 62 | 17 | --        | --   |
|            | Ca(ICC2/PI489777)SNP_07533 | 990  | G | A | 65 | 25 | --        | --   |
|            | Ca(ICC2/PI489777)SNP_07534 | 1155 | G | T | 65 | 19 | --        | --   |
|            | Ca(ICC2/PI489777)SNP_07535 | 1158 | G | A | 65 | 25 | --        | --   |
|            | Ca(ICC2/PI489777)SNP_07536 | 1383 | G | A | 48 | 20 | --        | --   |
| CakTC35104 | Ca(ICC2/PI489777)SNP_07537 | 57   | A | C | 3  | 7  | --        | --   |
| CakTC38191 | Ca(ICC2/PI489777)SNP_07538 | 554  | T | C | 5  | 7  | --        | --   |
| CakTC28181 | Ca(ICC2/PI489777)SNP_07539 | 349  | G | C | 9  | 10 | --        | --   |
| CakTC42084 | Ca(ICC2/PI489777)SNP_07540 | 1475 | G | T | 4  | 4  | --        | --   |
| CakTC41262 | Ca(ICC2/PI489777)SNP_07541 | 191  | T | G | 26 | 41 | --        | --   |
|            | Ca(ICC2/PI489777)SNP_07542 | 564  | C | G | 42 | 43 | --        | --   |
| CakTC26439 | Ca(ICC2/PI489777)SNP_07543 | 141  | A | C | 9  | 4  | --        | --   |

|            |                            |      |   |   |    |    |           |     |
|------------|----------------------------|------|---|---|----|----|-----------|-----|
|            | Ca(ICC2/P1489777)SNP_07544 | 433  | C | A | 38 | 4  | --        | --  |
|            | Ca(ICC2/P1489777)SNP_07545 | 443  | A | G | 37 | 3  | --        | --  |
| CakTC35607 | Ca(ICC2/P1489777)SNP_07546 | 647  | A | G | 7  | 5  | --        | --  |
|            | Ca(ICC2/P1489777)SNP_07547 | 728  | A | G | 9  | 7  | --        | --  |
|            | Ca(ICC2/P1489777)SNP_07548 | 1114 | A | T | 10 | 7  | --        | --  |
|            | Ca(ICC2/P1489777)SNP_07549 | 1192 | T | C | 12 | 9  | --        | --  |
|            | Ca(ICC2/P1489777)SNP_07550 | 2801 | G | A | 10 | 12 | --        | --  |
|            | Ca(ICC2/P1489777)SNP_07551 | 2915 | C | T | 10 | 13 | --        | --  |
| CakTC40145 | Ca(ICC2/P1489777)SNP_07552 | 480  | A | C | 7  | 3  | --        | --  |
|            | Ca(ICC2/P1489777)SNP_07553 | 589  | C | T | 8  | 5  | --        | --  |
|            | Ca(ICC2/P1489777)SNP_07554 | 1194 | T | C | 4  | 3  | --        | --  |
| CakTC40556 | Ca(ICC2/P1489777)SNP_07555 | 1006 | G | A | 15 | 7  | --        | --  |
|            | Ca(ICC2/P1489777)SNP_07556 | 1218 | G | T | 15 | 6  | --        | --  |
|            | Ca(ICC2/P1489777)SNP_07557 | 1357 | C | T | 12 | 4  | --        | --  |
|            | Ca(ICC2/P1489777)SNP_07558 | 1636 | T | C | 14 | 3  | --        | --  |
|            | Ca(ICC2/P1489777)SNP_07559 | 1641 | A | G | 14 | 4  | --        | --  |
|            | Ca(ICC2/P1489777)SNP_07560 | 1943 | G | C | 12 | 10 | --        | --  |
|            | Ca(ICC2/P1489777)SNP_07561 | 2005 | C | A | 9  | 8  | --        | --  |
| CakTC30146 | Ca(ICC2/P1489777)SNP_07562 | 761  | C | G | 3  | 4  | --        | --  |
| CakTC36272 | Ca(ICC2/P1489777)SNP_07563 | 778  | C | T | 13 | 3  | --        | --  |
|            | Ca(ICC2/P1489777)SNP_07564 | 811  | G | A | 13 | 4  | --        | --  |
|            | Ca(ICC2/P1489777)SNP_07565 | 1341 | A | G | 14 | 13 | --        | --  |
|            | Ca(ICC2/P1489777)SNP_07566 | 1594 | A | G | 17 | 6  | --        | --  |
| CakTC42813 | Ca(ICC2/P1489777)SNP_07567 | 343  | A | C | 39 | 10 | --        | --  |
|            | Ca(ICC2/P1489777)SNP_07568 | 551  | G | A | 48 | 15 | --        | --  |
|            | Ca(ICC2/P1489777)SNP_07569 | 1634 | G | A | 28 | 23 | --        | --  |
|            | Ca(ICC2/P1489777)SNP_07570 | 1688 | A | G | 26 | 16 | --        | --  |
| CakTC41561 | Ca(ICC2/P1489777)SNP_07571 | 328  | T | C | 11 | 4  | --        | --  |
| CakTC42744 | Ca(ICC2/P1489777)SNP_07572 | 295  | C | T | 4  | 3  | --        | --  |
|            | Ca(ICC2/P1489777)SNP_07573 | 364  | C | G | 6  | 3  | --        | --  |
|            | Ca(ICC2/P1489777)SNP_07574 | 418  | A | G | 9  | 4  | --        | --  |
|            | Ca(ICC2/P1489777)SNP_07575 | 529  | G | A | 11 | 3  | --        | --  |
|            | Ca(ICC2/P1489777)SNP_07576 | 544  | C | T | 11 | 5  | --        | --  |
|            | Ca(ICC2/P1489777)SNP_07577 | 547  | G | A | 11 | 5  | --        | --  |
|            | Ca(ICC2/P1489777)SNP_07578 | 618  | C | T | 13 | 5  | --        | --  |
|            | Ca(ICC2/P1489777)SNP_07579 | 630  | T | C | 11 | 5  | --        | --  |
|            | Ca(ICC2/P1489777)SNP_07580 | 652  | A | C | 11 | 4  | --        | --  |
|            | Ca(ICC2/P1489777)SNP_07581 | 673  | G | A | 9  | 6  | --        | --  |
|            | Ca(ICC2/P1489777)SNP_07582 | 787  | G | A | 5  | 5  | --        | --  |
|            | Ca(ICC2/P1489777)SNP_07583 | 795  | A | G | 5  | 5  | --        | --  |
| CakTC41571 | Ca(ICC2/P1489777)SNP_07584 | 592  | G | T | 95 | 99 | --        | --  |
|            | Ca(ICC2/P1489777)SNP_07585 | 694  | A | T | 91 | 83 | --        | --  |
| CakTC09438 | Ca(ICC2/P1489777)SNP_07586 | 874  | A | G | 3  | 4  | --        | --  |
| CakTC10281 | Ca(ICC2/P1489777)SNP_07587 | 318  | C | T | 4  | 5  | --        | --  |
| CakTC38225 | Ca(ICC2/P1489777)SNP_07588 | 73   | C | G | 10 | 3  | --        | --  |
|            | Ca(ICC2/P1489777)SNP_07589 | 647  | G | C | 39 | 24 | --        | --  |
|            | Ca(ICC2/P1489777)SNP_07590 | 876  | G | A | 29 | 31 | --        | --  |
|            | Ca(ICC2/P1489777)SNP_07591 | 897  | G | A | 31 | 28 | --        | --  |
|            | Ca(ICC2/P1489777)SNP_07592 | 972  | T | C | 12 | 11 | --        | --  |
| CakTC34169 | Ca(ICC2/P1489777)SNP_07593 | 49   | A | C | 6  | 3  | --        | --  |
|            | Ca(ICC2/P1489777)SNP_07594 | 64   | T | C | 7  | 4  | --        | --  |
|            | Ca(ICC2/P1489777)SNP_07595 | 778  | A | G | 4  | 11 | --        | --  |
|            | Ca(ICC2/P1489777)SNP_07596 | 785  | T | C | 3  | 10 | --        | --  |
| CakTC42892 | Ca(ICC2/P1489777)SNP_07597 | 183  | G | A | 16 | 12 | --        | --  |
|            | Ca(ICC2/P1489777)SNP_07598 | 307  | G | C | 14 | 12 | --        | --  |
| CakTC23653 | Ca(ICC2/P1489777)SNP_07599 | 337  | A | T | 25 | 18 | --        | --  |
|            | Ca(ICC2/P1489777)SNP_07600 | 1211 | A | C | 68 | 15 | --        | --  |
|            | Ca(ICC2/P1489777)SNP_07601 | 1256 | G | T | 64 | 20 | --        | --  |
|            | Ca(ICC2/P1489777)SNP_07602 | 1840 | A | T | 71 | 24 | --        | --  |
| CakTC32210 | Ca(ICC2/P1489777)SNP_07603 | 341  | A | G | 14 | 11 | --        | --  |
|            | Ca(ICC2/P1489777)SNP_07604 | 452  | C | A | 7  | 12 | --        | --  |
|            | Ca(ICC2/P1489777)SNP_07605 | 740  | T | C | 23 | 3  | --        | --  |
|            | Ca(ICC2/P1489777)SNP_07606 | 1114 | T | C | 13 | 12 | --        | --  |
| CakTC41497 | Ca(ICC2/P1489777)SNP_07607 | 254  | T | C | 7  | 5  | Flower    | bud |
|            | Ca(ICC2/P1489777)SNP_07608 | 469  | C | G | 10 | 13 | Flower    | bud |
|            | Ca(ICC2/P1489777)SNP_07609 | 563  | C | A | 7  | 10 | Flower    | bud |
| CakTC35126 | Ca(ICC2/P1489777)SNP_07610 | 676  | T | A | 10 | 10 | --        | --  |
|            | Ca(ICC2/P1489777)SNP_07611 | 1098 | C | T | 15 | 15 | --        | --  |
|            | Ca(ICC2/P1489777)SNP_07612 | 2209 | T | C | 26 | 12 | --        | --  |
|            | Ca(ICC2/P1489777)SNP_07613 | 2286 | C | A | 32 | 9  | --        | --  |
| CakTC36285 | Ca(ICC2/P1489777)SNP_07614 | 255  | T | G | 19 | 5  | Young_pod | --  |
|            | Ca(ICC2/P1489777)SNP_07615 | 279  | G | A | 16 | 7  | Young_pod | --  |
|            | Ca(ICC2/P1489777)SNP_07616 | 378  | A | G | 20 | 8  | Young_pod | --  |
| CakTC14260 | Ca(ICC2/P1489777)SNP_07617 | 198  | C | G | 6  | 3  | --        | --  |

|            |                            |      |   |   |    |    |       |      |
|------------|----------------------------|------|---|---|----|----|-------|------|
|            | Ca(ICC2/PI489777)SNP_07618 | 326  | C | A | 10 | 5  | --    | --   |
|            | Ca(ICC2/PI489777)SNP_07619 | 364  | T | A | 12 | 8  | --    | --   |
|            | Ca(ICC2/PI489777)SNP_07620 | 751  | A | T | 17 | 9  | --    | --   |
| CakTC32486 | Ca(ICC2/PI489777)SNP_07621 | 1167 | G | A | 11 | 10 | --    | --   |
| CakTC37591 | Ca(ICC2/PI489777)SNP_07622 | 542  | T | C | 8  | 11 | --    | --   |
| CakTC25664 | Ca(ICC2/PI489777)SNP_07623 | 452  | A | C | 22 | 10 | --    | WRKY |
|            | Ca(ICC2/PI489777)SNP_07624 | 491  | C | T | 17 | 11 | --    | WRKY |
|            | Ca(ICC2/PI489777)SNP_07625 | 620  | C | T | 54 | 8  | --    | WRKY |
|            | Ca(ICC2/PI489777)SNP_07626 | 776  | A | G | 52 | 12 | --    | WRKY |
| CakTC38114 | Ca(ICC2/PI489777)SNP_07627 | 341  | A | G | 8  | 4  | --    | --   |
|            | Ca(ICC2/PI489777)SNP_07628 | 1448 | G | A | 4  | 4  | --    | --   |
| CakTC40298 | Ca(ICC2/PI489777)SNP_07629 | 48   | C | A | 4  | 5  | --    | --   |
|            | Ca(ICC2/PI489777)SNP_07630 | 49   | T | C | 4  | 5  | --    | --   |
|            | Ca(ICC2/PI489777)SNP_07631 | 222  | A | G | 18 | 11 | --    | --   |
|            | Ca(ICC2/PI489777)SNP_07632 | 482  | C | T | 19 | 10 | --    | --   |
|            | Ca(ICC2/PI489777)SNP_07633 | 714  | A | G | 22 | 5  | --    | --   |
|            | Ca(ICC2/PI489777)SNP_07634 | 1807 | A | G | 12 | 8  | --    | --   |
|            | Ca(ICC2/PI489777)SNP_07635 | 1917 | G | A | 8  | 5  | --    | --   |
|            | Ca(ICC2/PI489777)SNP_07636 | 2026 | A | G | 3  | 5  | --    | --   |
| CakTC25133 | Ca(ICC2/PI489777)SNP_07637 | 191  | C | A | 3  | 3  | --    | --   |
|            | Ca(ICC2/PI489777)SNP_07638 | 244  | A | G | 3  | 5  | --    | --   |
| CakTC09089 | Ca(ICC2/PI489777)SNP_07639 | 70   | G | A | 4  | 4  | Shoot | --   |
| CakTC25356 | Ca(ICC2/PI489777)SNP_07640 | 353  | G | A | 46 | 17 | --    | --   |
|            | Ca(ICC2/PI489777)SNP_07641 | 560  | T | C | 53 | 22 | --    | --   |
|            | Ca(ICC2/PI489777)SNP_07642 | 659  | G | A | 52 | 11 | --    | --   |
|            | Ca(ICC2/PI489777)SNP_07643 | 995  | G | A | 29 | 14 | --    | --   |
|            | Ca(ICC2/PI489777)SNP_07644 | 1266 | T | G | 30 | 14 | --    | --   |
|            | Ca(ICC2/PI489777)SNP_07645 | 1407 | G | A | 18 | 8  | --    | --   |
|            | Ca(ICC2/PI489777)SNP_07646 | 1423 | A | G | 31 | 10 | --    | --   |
|            | Ca(ICC2/PI489777)SNP_07647 | 1526 | C | T | 32 | 4  | --    | --   |
|            | Ca(ICC2/PI489777)SNP_07648 | 1530 | A | C | 34 | 4  | --    | --   |
|            | Ca(ICC2/PI489777)SNP_07649 | 1658 | T | C | 29 | 4  | --    | --   |
|            | Ca(ICC2/PI489777)SNP_07650 | 1983 | A | G | 29 | 7  | --    | --   |
|            | Ca(ICC2/PI489777)SNP_07651 | 2010 | G | A | 26 | 8  | --    | --   |
|            | Ca(ICC2/PI489777)SNP_07652 | 2297 | A | G | 31 | 6  | --    | --   |
|            | Ca(ICC2/PI489777)SNP_07653 | 2453 | C | T | 23 | 14 | --    | --   |
|            | Ca(ICC2/PI489777)SNP_07654 | 2469 | T | C | 25 | 14 | --    | --   |
|            | Ca(ICC2/PI489777)SNP_07655 | 2694 | C | T | 28 | 13 | --    | --   |
|            | Ca(ICC2/PI489777)SNP_07656 | 2736 | C | T | 28 | 8  | --    | --   |
|            | Ca(ICC2/PI489777)SNP_07657 | 3113 | C | T | 8  | 3  | --    | --   |
| CakTC25032 | Ca(ICC2/PI489777)SNP_07658 | 610  | A | G | 57 | 27 | --    | --   |
|            | Ca(ICC2/PI489777)SNP_07659 | 861  | C | T | 70 | 25 | --    | --   |
|            | Ca(ICC2/PI489777)SNP_07660 | 916  | G | T | 73 | 34 | --    | --   |
|            | Ca(ICC2/PI489777)SNP_07661 | 1888 | G | T | 41 | 20 | --    | --   |
|            | Ca(ICC2/PI489777)SNP_07662 | 1960 | G | A | 50 | 24 | --    | --   |
|            | Ca(ICC2/PI489777)SNP_07663 | 2053 | G | C | 49 | 25 | --    | --   |
|            | Ca(ICC2/PI489777)SNP_07664 | 2687 | C | G | 17 | 9  | --    | --   |
|            | Ca(ICC2/PI489777)SNP_07665 | 2822 | G | T | 11 | 5  | --    | --   |
| CakTC24656 | Ca(ICC2/PI489777)SNP_07666 | 237  | G | A | 3  | 5  | --    | --   |
| CakTC27623 | Ca(ICC2/PI489777)SNP_07667 | 180  | A | C | 21 | 21 | --    | --   |
|            | Ca(ICC2/PI489777)SNP_07668 | 578  | C | T | 18 | 9  | --    | --   |
| CakTC28425 | Ca(ICC2/PI489777)SNP_07669 | 177  | T | A | 16 | 9  | --    | --   |
|            | Ca(ICC2/PI489777)SNP_07670 | 272  | T | C | 13 | 11 | --    | --   |
|            | Ca(ICC2/PI489777)SNP_07671 | 553  | C | A | 11 | 4  | --    | --   |
| CakTC39495 | Ca(ICC2/PI489777)SNP_07672 | 136  | T | C | 3  | 17 | --    | --   |
|            | Ca(ICC2/PI489777)SNP_07673 | 722  | T | C | 17 | 29 | --    | --   |
|            | Ca(ICC2/PI489777)SNP_07674 | 739  | A | T | 13 | 25 | --    | --   |
|            | Ca(ICC2/PI489777)SNP_07675 | 867  | T | C | 19 | 29 | --    | --   |
| CakTC30019 | Ca(ICC2/PI489777)SNP_07676 | 19   | C | T | 9  | 4  | --    | --   |
|            | Ca(ICC2/PI489777)SNP_07677 | 899  | G | T | 24 | 19 | --    | --   |
|            | Ca(ICC2/PI489777)SNP_07678 | 1825 | T | C | 32 | 12 | --    | --   |
|            | Ca(ICC2/PI489777)SNP_07679 | 1873 | C | A | 33 | 13 | --    | --   |
|            | Ca(ICC2/PI489777)SNP_07680 | 1996 | C | T | 42 | 11 | --    | --   |
|            | Ca(ICC2/PI489777)SNP_07681 | 2476 | C | G | 33 | 16 | --    | --   |
| CakTC26007 | Ca(ICC2/PI489777)SNP_07682 | 695  | T | A | 8  | 10 | --    | --   |
|            | Ca(ICC2/PI489777)SNP_07683 | 1598 | A | T | 24 | 8  | --    | --   |
| CakTC42717 | Ca(ICC2/PI489777)SNP_07684 | 274  | G | T | 7  | 3  | --    | --   |
| CakTC38789 | Ca(ICC2/PI489777)SNP_07685 | 171  | G | A | 37 | 12 | --    | --   |
| CakTC41464 | Ca(ICC2/PI489777)SNP_07686 | 361  | G | C | 13 | 5  | --    | --   |
|            | Ca(ICC2/PI489777)SNP_07687 | 600  | C | T | 11 | 5  | --    | --   |
| CakTC30367 | Ca(ICC2/PI489777)SNP_07688 | 296  | C | T | 4  | 3  | --    | --   |
|            | Ca(ICC2/PI489777)SNP_07689 | 622  | G | T | 3  | 4  | --    | --   |
|            | Ca(ICC2/PI489777)SNP_07690 | 716  | G | T | 4  | 4  | --    | --   |
| CakTC32789 | Ca(ICC2/PI489777)SNP_07691 | 431  | A | G | 10 | 5  | --    | --   |



|            |                            |      |   |   |    |    |       |     |
|------------|----------------------------|------|---|---|----|----|-------|-----|
|            | Ca(ICC2/PI489777)SNP_07692 | 565  | T | C | 15 | 3  | --    | --  |
|            | Ca(ICC2/PI489777)SNP_07693 | 843  | T | G | 17 | 12 | --    | --  |
|            | Ca(ICC2/PI489777)SNP_07694 | 2912 | T | C | 11 | 5  | --    | --  |
| CakTC30426 | Ca(ICC2/PI489777)SNP_07695 | 1036 | C | T | 4  | 15 | Root  | --  |
|            | Ca(ICC2/PI489777)SNP_07696 | 1163 | C | A | 5  | 9  | Root  | --  |
|            | Ca(ICC2/PI489777)SNP_07697 | 1237 | T | C | 5  | 8  | Root  | --  |
|            | Ca(ICC2/PI489777)SNP_07698 | 1250 | T | A | 5  | 7  | Root  | --  |
|            | Ca(ICC2/PI489777)SNP_07699 | 1252 | T | C | 4  | 6  | Root  | --  |
| CakTC08125 | Ca(ICC2/PI489777)SNP_07700 | 706  | T | C | 3  | 4  | --    | --  |
|            | Ca(ICC2/PI489777)SNP_07701 | 782  | G | C | 4  | 5  | --    | --  |
|            | Ca(ICC2/PI489777)SNP_07702 | 957  | T | C | 3  | 10 | --    | --  |
| CakTC34189 | Ca(ICC2/PI489777)SNP_07703 | 1696 | G | A | 16 | 6  | --    | --  |
|            | Ca(ICC2/PI489777)SNP_07704 | 1777 | A | C | 13 | 6  | --    | --  |
| CakTC16382 | Ca(ICC2/PI489777)SNP_07705 | 466  | G | A | 3  | 15 | --    | --  |
| CakTC40818 | Ca(ICC2/PI489777)SNP_07706 | 316  | G | C | 19 | 7  | --    | --  |
|            | Ca(ICC2/PI489777)SNP_07707 | 589  | T | A | 4  | 8  | --    | --  |
|            | Ca(ICC2/PI489777)SNP_07708 | 874  | C | T | 8  | 9  | --    | --  |
|            | Ca(ICC2/PI489777)SNP_07709 | 907  | T | C | 13 | 10 | --    | --  |
|            | Ca(ICC2/PI489777)SNP_07710 | 977  | T | C | 14 | 10 | --    | --  |
| CakTC41504 | Ca(ICC2/PI489777)SNP_07711 | 1325 | G | A | 4  | 5  | --    | --  |
| CakTC33516 | Ca(ICC2/PI489777)SNP_07712 | 120  | C | A | 11 | 12 | --    | --  |
|            | Ca(ICC2/PI489777)SNP_07713 | 140  | G | T | 12 | 13 | --    | --  |
|            | Ca(ICC2/PI489777)SNP_07714 | 277  | A | G | 17 | 19 | --    | --  |
|            | Ca(ICC2/PI489777)SNP_07715 | 464  | G | C | 23 | 18 | --    | --  |
| CakTC32423 | Ca(ICC2/PI489777)SNP_07716 | 138  | A | C | 5  | 3  | --    | --  |
| CakTC33424 | Ca(ICC2/PI489777)SNP_07717 | 1084 | A | G | 9  | 4  | --    | --  |
| CakTC23178 | Ca(ICC2/PI489777)SNP_07718 | 483  | A | G | 3  | 6  | --    | --  |
| CakTC41195 | Ca(ICC2/PI489777)SNP_07719 | 235  | T | C | 30 | 18 | --    | --  |
| CakTC22890 | Ca(ICC2/PI489777)SNP_07720 | 992  | C | T | 9  | 6  | --    | --  |
|            | Ca(ICC2/PI489777)SNP_07721 | 1106 | C | T | 7  | 4  | --    | --  |
|            | Ca(ICC2/PI489777)SNP_07722 | 1181 | T | C | 7  | 4  | --    | --  |
|            | Ca(ICC2/PI489777)SNP_07723 | 2197 | A | G | 8  | 16 | --    | --  |
|            | Ca(ICC2/PI489777)SNP_07724 | 2708 | T | C | 11 | 13 | --    | --  |
|            | Ca(ICC2/PI489777)SNP_07725 | 2903 | A | C | 19 | 10 | --    | --  |
|            | Ca(ICC2/PI489777)SNP_07726 | 3014 | A | C | 21 | 10 | --    | --  |
|            | Ca(ICC2/PI489777)SNP_07727 | 3146 | T | A | 23 | 9  | --    | --  |
|            | Ca(ICC2/PI489777)SNP_07728 | 3147 | G | T | 23 | 9  | --    | --  |
|            | Ca(ICC2/PI489777)SNP_07729 | 3206 | C | T | 15 | 8  | --    | --  |
|            | Ca(ICC2/PI489777)SNP_07730 | 3269 | G | T | 11 | 5  | --    | --  |
|            | Ca(ICC2/PI489777)SNP_07731 | 3332 | G | T | 6  | 5  | --    | --  |
|            | Ca(ICC2/PI489777)SNP_07732 | 3343 | T | A | 6  | 5  | --    | --  |
| CakTC33952 | Ca(ICC2/PI489777)SNP_07733 | 771  | T | A | 14 | 7  | Shoot | MYB |
| CakTC01326 | Ca(ICC2/PI489777)SNP_07734 | 591  | C | T | 6  | 3  | --    | --  |
|            | Ca(ICC2/PI489777)SNP_07735 | 621  | G | A | 6  | 3  | --    | --  |
|            | Ca(ICC2/PI489777)SNP_07736 | 798  | T | G | 5  | 3  | --    | --  |
| CakTC09532 | Ca(ICC2/PI489777)SNP_07737 | 931  | G | A | 4  | 5  | --    | --  |
| CakTC37481 | Ca(ICC2/PI489777)SNP_07738 | 1058 | G | A | 3  | 3  | --    | --  |
| CakTC40719 | Ca(ICC2/PI489777)SNP_07739 | 156  | G | A | 9  | 10 | --    | --  |
|            | Ca(ICC2/PI489777)SNP_07740 | 654  | C | T | 6  | 10 | --    | --  |
|            | Ca(ICC2/PI489777)SNP_07741 | 675  | A | C | 5  | 10 | --    | --  |
|            | Ca(ICC2/PI489777)SNP_07742 | 687  | T | G | 5  | 10 | --    | --  |
| CakTC34517 | Ca(ICC2/PI489777)SNP_07743 | 127  | A | G | 15 | 16 | --    | --  |
|            | Ca(ICC2/PI489777)SNP_07744 | 571  | A | T | 22 | 7  | --    | --  |
| CakTC37958 | Ca(ICC2/PI489777)SNP_07745 | 345  | G | A | 39 | 3  | --    | --  |
|            | Ca(ICC2/PI489777)SNP_07746 | 361  | T | C | 42 | 3  | --    | --  |
|            | Ca(ICC2/PI489777)SNP_07747 | 390  | T | A | 37 | 3  | --    | --  |
|            | Ca(ICC2/PI489777)SNP_07748 | 479  | T | C | 20 | 3  | --    | --  |
|            | Ca(ICC2/PI489777)SNP_07749 | 492  | A | G | 19 | 3  | --    | --  |
| CakTC28555 | Ca(ICC2/PI489777)SNP_07750 | 42   | A | G | 13 | 7  | --    | --  |
|            | Ca(ICC2/PI489777)SNP_07751 | 203  | A | T | 20 | 9  | --    | --  |
|            | Ca(ICC2/PI489777)SNP_07752 | 1017 | A | C | 18 | 3  | --    | --  |
|            | Ca(ICC2/PI489777)SNP_07753 | 1152 | T | C | 19 | 8  | --    | --  |
|            | Ca(ICC2/PI489777)SNP_07754 | 1161 | T | C | 18 | 11 | --    | --  |
|            | Ca(ICC2/PI489777)SNP_07755 | 1326 | T | A | 18 | 18 | --    | --  |
| CakTC41530 | Ca(ICC2/PI489777)SNP_07756 | 151  | T | G | 17 | 31 | --    | --  |
|            | Ca(ICC2/PI489777)SNP_07757 | 356  | G | A | 16 | 25 | --    | --  |
|            | Ca(ICC2/PI489777)SNP_07758 | 376  | T | C | 14 | 31 | --    | --  |
|            | Ca(ICC2/PI489777)SNP_07759 | 498  | A | G | 6  | 19 | --    | --  |
| CakTC28373 | Ca(ICC2/PI489777)SNP_07760 | 378  | G | T | 30 | 17 | --    | --  |
|            | Ca(ICC2/PI489777)SNP_07761 | 790  | T | C | 22 | 9  | --    | --  |
|            | Ca(ICC2/PI489777)SNP_07762 | 898  | C | G | 28 | 11 | --    | --  |
|            | Ca(ICC2/PI489777)SNP_07763 | 1016 | T | C | 35 | 14 | --    | --  |
|            | Ca(ICC2/PI489777)SNP_07764 | 1139 | G | T | 37 | 13 | --    | --  |
|            | Ca(ICC2/PI489777)SNP_07765 | 1355 | A | G | 27 | 8  | --    | --  |

|            |                            |      |   |   |     |     |           |           |
|------------|----------------------------|------|---|---|-----|-----|-----------|-----------|
|            | Ca(ICC2/PI489777)SNP_07766 | 1613 | A | G | 24  | 7   | --        | --        |
| CakTC39061 | Ca(ICC2/PI489777)SNP_07767 | 285  | C | A | 7   | 4   | --        | --        |
|            | Ca(ICC2/PI489777)SNP_07768 | 794  | C | T | 9   | 3   | --        | --        |
|            | Ca(ICC2/PI489777)SNP_07769 | 1430 | T | C | 22  | 3   | --        | --        |
|            | Ca(ICC2/PI489777)SNP_07770 | 1441 | C | G | 21  | 3   | --        | --        |
|            | Ca(ICC2/PI489777)SNP_07771 | 1446 | T | C | 21  | 3   | --        | --        |
|            | Ca(ICC2/PI489777)SNP_07772 | 1476 | A | G | 18  | 3   | --        | --        |
|            | Ca(ICC2/PI489777)SNP_07773 | 1480 | G | A | 21  | 3   | --        | --        |
|            | Ca(ICC2/PI489777)SNP_07774 | 1487 | C | T | 19  | 3   | --        | --        |
|            | Ca(ICC2/PI489777)SNP_07775 | 1579 | A | G | 13  | 3   | --        | --        |
|            | Ca(ICC2/PI489777)SNP_07776 | 1583 | C | G | 11  | 3   | --        | --        |
| CakTC08416 | Ca(ICC2/PI489777)SNP_07777 | 324  | T | G | 4   | 3   | --        | --        |
|            | Ca(ICC2/PI489777)SNP_07778 | 576  | C | T | 3   | 5   | --        | --        |
|            | Ca(ICC2/PI489777)SNP_07779 | 732  | A | G | 3   | 8   | --        | --        |
| CakTC35474 | Ca(ICC2/PI489777)SNP_07780 | 888  | A | T | 17  | 4   | --        | --        |
| CakTC29293 | Ca(ICC2/PI489777)SNP_07781 | 485  | A | G | 34  | 8   | --        | --        |
| CakTC35643 | Ca(ICC2/PI489777)SNP_07782 | 188  | A | T | 4   | 8   | --        | --        |
|            | Ca(ICC2/PI489777)SNP_07783 | 383  | G | A | 6   | 5   | --        | --        |
|            | Ca(ICC2/PI489777)SNP_07784 | 911  | T | A | 4   | 5   | --        | --        |
|            | Ca(ICC2/PI489777)SNP_07785 | 2347 | C | T | 8   | 11  | --        | --        |
|            | Ca(ICC2/PI489777)SNP_07786 | 2363 | G | A | 7   | 13  | --        | --        |
|            | Ca(ICC2/PI489777)SNP_07787 | 2527 | C | A | 8   | 5   | --        | --        |
|            | Ca(ICC2/PI489777)SNP_07788 | 2535 | A | G | 8   | 11  | --        | --        |
|            | Ca(ICC2/PI489777)SNP_07789 | 2676 | T | A | 12  | 12  | --        | --        |
|            | Ca(ICC2/PI489777)SNP_07790 | 3194 | C | T | 9   | 23  | --        | --        |
|            | Ca(ICC2/PI489777)SNP_07791 | 3497 | T | C | 12  | 21  | --        | --        |
|            | Ca(ICC2/PI489777)SNP_07792 | 3787 | C | A | 11  | 6   | --        | --        |
|            | Ca(ICC2/PI489777)SNP_07793 | 4088 | G | A | 6   | 12  | --        | --        |
| CakTC39156 | Ca(ICC2/PI489777)SNP_07794 | 343  | C | T | 9   | 5   | --        | --        |
|            | Ca(ICC2/PI489777)SNP_07795 | 406  | T | C | 8   | 8   | --        | --        |
|            | Ca(ICC2/PI489777)SNP_07796 | 439  | C | T | 10  | 8   | --        | --        |
|            | Ca(ICC2/PI489777)SNP_07797 | 493  | A | C | 9   | 8   | --        | --        |
|            | Ca(ICC2/PI489777)SNP_07798 | 780  | G | A | 5   | 7   | --        | --        |
|            | Ca(ICC2/PI489777)SNP_07799 | 811  | A | C | 7   | 5   | --        | --        |
|            | Ca(ICC2/PI489777)SNP_07800 | 1075 | T | C | 3   | 4   | --        | --        |
| CakTC10605 | Ca(ICC2/PI489777)SNP_07801 | 553  | A | G | 208 | 136 | --        | --        |
| CakTC42925 | Ca(ICC2/PI489777)SNP_07802 | 435  | T | C | 15  | 15  | --        | --        |
|            | Ca(ICC2/PI489777)SNP_07803 | 474  | A | G | 10  | 13  | --        | --        |
|            | Ca(ICC2/PI489777)SNP_07804 | 695  | A | G | 4   | 3   | --        | --        |
| CakTC23861 | Ca(ICC2/PI489777)SNP_07805 | 450  | A | T | 6   | 3   | --        | AUX/IAA   |
| CakTC39632 | Ca(ICC2/PI489777)SNP_07806 | 144  | G | C | 3   | 4   | --        | --        |
| CakTC08215 | Ca(ICC2/PI489777)SNP_07807 | 672  | T | A | 8   | 17  | --        | --        |
|            | Ca(ICC2/PI489777)SNP_07808 | 1578 | G | T | 20  | 5   | --        | --        |
| CakTC26984 | Ca(ICC2/PI489777)SNP_07809 | 2283 | T | G | 10  | 3   | --        | --        |
| CakTC36616 | Ca(ICC2/PI489777)SNP_07810 | 266  | G | A | 38  | 11  | --        | --        |
|            | Ca(ICC2/PI489777)SNP_07811 | 278  | T | C | 33  | 11  | --        | --        |
|            | Ca(ICC2/PI489777)SNP_07812 | 368  | A | G | 33  | 11  | --        | --        |
|            | Ca(ICC2/PI489777)SNP_07813 | 383  | G | A | 33  | 11  | --        | --        |
| CakTC23758 | Ca(ICC2/PI489777)SNP_07814 | 1391 | A | C | 30  | 6   | Root      | --        |
|            | Ca(ICC2/PI489777)SNP_07815 | 1844 | C | T | 44  | 4   | Root      | --        |
| CakTC09044 | Ca(ICC2/PI489777)SNP_07816 | 195  | G | T | 4   | 4   | --        | AP2-EREBP |
| CakTC40587 | Ca(ICC2/PI489777)SNP_07817 | 395  | C | T | 22  | 37  | --        | --        |
|            | Ca(ICC2/PI489777)SNP_07818 | 437  | C | T | 22  | 39  | --        | --        |
|            | Ca(ICC2/PI489777)SNP_07819 | 590  | A | G | 18  | 20  | --        | --        |
| CakTC40594 | Ca(ICC2/PI489777)SNP_07820 | 538  | C | T | 68  | 59  | --        | --        |
| CakTC23516 | Ca(ICC2/PI489777)SNP_07821 | 583  | T | G | 9   | 4   | --        | --        |
|            | Ca(ICC2/PI489777)SNP_07822 | 667  | A | G | 9   | 6   | --        | --        |
|            | Ca(ICC2/PI489777)SNP_07823 | 727  | A | T | 8   | 6   | --        | --        |
| CakTC29319 | Ca(ICC2/PI489777)SNP_07824 | 910  | C | T | 3   | 5   | Flower    | bud       |
| CakTC38795 | Ca(ICC2/PI489777)SNP_07825 | 443  | C | G | 6   | 4   | --        | --        |
| CakTC41065 | Ca(ICC2/PI489777)SNP_07826 | 574  | G | A | 14  | 10  | --        | --        |
| CakTC42470 | Ca(ICC2/PI489777)SNP_07827 | 136  | G | C | 22  | 12  | --        | --        |
|            | Ca(ICC2/PI489777)SNP_07828 | 320  | T | G | 58  | 13  | --        | --        |
| CakTC36805 | Ca(ICC2/PI489777)SNP_07829 | 2705 | T | C | 20  | 18  | --        | --        |
| CakTC27715 | Ca(ICC2/PI489777)SNP_07830 | 40   | T | A | 7   | 4   | Young_pod | --        |
|            | Ca(ICC2/PI489777)SNP_07831 | 41   | T | C | 8   | 4   | Young_pod | --        |
|            | Ca(ICC2/PI489777)SNP_07832 | 151  | G | C | 8   | 7   | Young_pod | --        |
|            | Ca(ICC2/PI489777)SNP_07833 | 158  | A | C | 6   | 7   | Young_pod | --        |
|            | Ca(ICC2/PI489777)SNP_07834 | 210  | A | C | 3   | 6   | Young_pod | --        |
|            | Ca(ICC2/PI489777)SNP_07835 | 1195 | G | C | 19  | 11  | Young_pod | --        |
|            | Ca(ICC2/PI489777)SNP_07836 | 1210 | C | A | 17  | 11  | Young_pod | --        |
| CakTC08134 | Ca(ICC2/PI489777)SNP_07837 | 1367 | C | T | 3   | 3   | Young_pod | --        |
|            | Ca(ICC2/PI489777)SNP_07838 | 1369 | T | G | 3   | 3   | Young_pod | --        |
|            | Ca(ICC2/PI489777)SNP_07839 | 1490 | T | A | 4   | 3   | Young_pod | --        |

|            |                            |      |   |   |     |    |           |     |
|------------|----------------------------|------|---|---|-----|----|-----------|-----|
|            | Ca(ICC2/PI489777)SNP_07840 | 1513 | G | A | 4   | 3  | Young_pod | --  |
|            | Ca(ICC2/PI489777)SNP_07841 | 1564 | C | T | 4   | 3  | Young_pod | --  |
|            | Ca(ICC2/PI489777)SNP_07842 | 1688 | C | T | 3   | 4  | Young_pod | --  |
|            | Ca(ICC2/PI489777)SNP_07843 | 2192 | G | A | 3   | 3  | Young_pod | --  |
|            | Ca(ICC2/PI489777)SNP_07844 | 2273 | G | T | 3   | 3  | Young_pod | --  |
| CakTC25849 | Ca(ICC2/PI489777)SNP_07845 | 263  | A | G | 217 | 52 | --        | --  |
|            | Ca(ICC2/PI489777)SNP_07846 | 1688 | G | A | 16  | 27 | --        | --  |
|            | Ca(ICC2/PI489777)SNP_07847 | 1700 | A | G | 13  | 27 | --        | --  |
|            | Ca(ICC2/PI489777)SNP_07848 | 1770 | A | T | 19  | 26 | --        | --  |
|            | Ca(ICC2/PI489777)SNP_07849 | 1979 | T | C | 15  | 22 | --        | --  |
|            | Ca(ICC2/PI489777)SNP_07850 | 2053 | C | A | 15  | 20 | --        | --  |
|            | Ca(ICC2/PI489777)SNP_07851 | 2123 | T | C | 11  | 14 | --        | --  |
|            | Ca(ICC2/PI489777)SNP_07852 | 2213 | A | G | 10  | 14 | --        | --  |
|            | Ca(ICC2/PI489777)SNP_07853 | 2255 | G | A | 6   | 10 | --        | --  |
|            | Ca(ICC2/PI489777)SNP_07854 | 2309 | G | A | 6   | 8  | --        | --  |
|            | Ca(ICC2/PI489777)SNP_07855 | 2465 | T | C | 9   | 3  | --        | --  |
|            | Ca(ICC2/PI489777)SNP_07856 | 2520 | G | T | 7   | 4  | --        | --  |
|            | Ca(ICC2/PI489777)SNP_07857 | 2633 | T | C | 9   | 4  | --        | --  |
| CakTC39631 | Ca(ICC2/PI489777)SNP_07858 | 498  | A | G | 29  | 20 | --        | --  |
|            | Ca(ICC2/PI489777)SNP_07859 | 795  | A | G | 23  | 17 | --        | --  |
|            | Ca(ICC2/PI489777)SNP_07860 | 870  | A | G | 21  | 17 | --        | --  |
|            | Ca(ICC2/PI489777)SNP_07861 | 1062 | A | C | 13  | 12 | --        | --  |
|            | Ca(ICC2/PI489777)SNP_07862 | 1371 | G | A | 35  | 12 | --        | --  |
|            | Ca(ICC2/PI489777)SNP_07863 | 1559 | C | G | 16  | 7  | --        | --  |
|            | Ca(ICC2/PI489777)SNP_07864 | 1584 | A | G | 13  | 3  | --        | --  |
| CakTC27394 | Ca(ICC2/PI489777)SNP_07865 | 3034 | A | G | 46  | 45 | --        | --  |
| CakTC38887 | Ca(ICC2/PI489777)SNP_07866 | 521  | C | T | 6   | 7  | --        | --  |
|            | Ca(ICC2/PI489777)SNP_07867 | 776  | G | A | 4   | 3  | --        | --  |
|            | Ca(ICC2/PI489777)SNP_07868 | 1064 | G | A | 3   | 4  | --        | --  |
| CakTC33643 | Ca(ICC2/PI489777)SNP_07869 | 1386 | C | T | 11  | 4  | --        | SET |
|            | Ca(ICC2/PI489777)SNP_07870 | 1466 | T | C | 6   | 5  | --        | SET |
|            | Ca(ICC2/PI489777)SNP_07871 | 1942 | A | G | 3   | 6  | --        | SET |
|            | Ca(ICC2/PI489777)SNP_07872 | 2733 | C | A | 6   | 11 | --        | SET |
|            | Ca(ICC2/PI489777)SNP_07873 | 2801 | C | T | 6   | 12 | --        | SET |
|            | Ca(ICC2/PI489777)SNP_07874 | 3173 | T | C | 3   | 8  | --        | SET |
|            | Ca(ICC2/PI489777)SNP_07875 | 3567 | G | A | 6   | 5  | --        | SET |
|            | Ca(ICC2/PI489777)SNP_07876 | 4614 | G | A | 4   | 6  | --        | SET |
|            | Ca(ICC2/PI489777)SNP_07877 | 5217 | A | T | 5   | 4  | --        | SET |
|            | Ca(ICC2/PI489777)SNP_07878 | 5248 | C | T | 3   | 3  | --        | SET |
|            | Ca(ICC2/PI489777)SNP_07879 | 5320 | C | G | 4   | 3  | --        | SET |
|            | Ca(ICC2/PI489777)SNP_07880 | 6018 | G | A | 7   | 7  | --        | SET |
|            | Ca(ICC2/PI489777)SNP_07881 | 6078 | G | A | 11  | 8  | --        | SET |
| CakTC38570 | Ca(ICC2/PI489777)SNP_07882 | 563  | T | C | 58  | 44 | --        | --  |
|            | Ca(ICC2/PI489777)SNP_07883 | 776  | G | A | 41  | 27 | --        | --  |
|            | Ca(ICC2/PI489777)SNP_07884 | 868  | C | T | 26  | 13 | --        | --  |
|            | Ca(ICC2/PI489777)SNP_07885 | 919  | G | C | 19  | 11 | --        | --  |
| CakTC27380 | Ca(ICC2/PI489777)SNP_07886 | 465  | T | G | 13  | 7  | --        | --  |
| CakTC28312 | Ca(ICC2/PI489777)SNP_07887 | 410  | C | T | 28  | 16 | --        | --  |
|            | Ca(ICC2/PI489777)SNP_07888 | 3593 | A | C | 6   | 8  | --        | --  |
| CakTC07647 | Ca(ICC2/PI489777)SNP_07889 | 492  | T | C | 8   | 4  | --        | --  |
| CakTC28627 | Ca(ICC2/PI489777)SNP_07890 | 989  | G | A | 4   | 6  | Young_pod | --  |
| CakTC24350 | Ca(ICC2/PI489777)SNP_07891 | 1566 | G | A | 5   | 4  | Young_pod | --  |
| CakTC42158 | Ca(ICC2/PI489777)SNP_07892 | 453  | A | G | 9   | 3  | --        | --  |
| CakTC00828 | Ca(ICC2/PI489777)SNP_07893 | 873  | G | A | 7   | 5  | --        | --  |
| CakTC28287 | Ca(ICC2/PI489777)SNP_07894 | 1635 | A | G | 3   | 3  | --        | --  |
| CakTC26923 | Ca(ICC2/PI489777)SNP_07895 | 677  | A | C | 17  | 9  | --        | --  |
|            | Ca(ICC2/PI489777)SNP_07896 | 1186 | C | T | 46  | 13 | --        | --  |
|            | Ca(ICC2/PI489777)SNP_07897 | 1201 | T | C | 48  | 12 | --        | --  |
|            | Ca(ICC2/PI489777)SNP_07898 | 1249 | A | T | 43  | 12 | --        | --  |
|            | Ca(ICC2/PI489777)SNP_07899 | 1384 | T | C | 28  | 12 | --        | --  |
|            | Ca(ICC2/PI489777)SNP_07900 | 1477 | G | A | 32  | 15 | --        | --  |
|            | Ca(ICC2/PI489777)SNP_07901 | 1594 | T | C | 20  | 13 | --        | --  |
|            | Ca(ICC2/PI489777)SNP_07902 | 1718 | C | G | 22  | 10 | --        | --  |
|            | Ca(ICC2/PI489777)SNP_07903 | 2337 | G | C | 25  | 8  | --        | --  |
|            | Ca(ICC2/PI489777)SNP_07904 | 3106 | C | T | 15  | 6  | --        | --  |
|            | Ca(ICC2/PI489777)SNP_07905 | 3582 | A | G | 33  | 27 | --        | --  |
|            | Ca(ICC2/PI489777)SNP_07906 | 3636 | G | A | 19  | 6  | --        | --  |
|            | Ca(ICC2/PI489777)SNP_07907 | 3640 | C | T | 17  | 6  | --        | --  |
|            | Ca(ICC2/PI489777)SNP_07908 | 4120 | G | A | 24  | 9  | --        | --  |
|            | Ca(ICC2/PI489777)SNP_07909 | 4889 | C | G | 34  | 8  | --        | --  |
|            | Ca(ICC2/PI489777)SNP_07910 | 5508 | G | C | 34  | 10 | --        | --  |
|            | Ca(ICC2/PI489777)SNP_07911 | 5632 | A | G | 34  | 11 | --        | --  |
|            | Ca(ICC2/PI489777)SNP_07912 | 5749 | C | T | 37  | 16 | --        | --  |
|            | Ca(ICC2/PI489777)SNP_07913 | 5842 | A | G | 28  | 16 | --        | --  |

|            |                            |      |   |   |    |    |        |      |
|------------|----------------------------|------|---|---|----|----|--------|------|
|            | Ca(ICC2/PI489777)SNP_07914 | 5977 | T | A | 40 | 16 | --     | --   |
|            | Ca(ICC2/PI489777)SNP_07915 | 6025 | A | G | 42 | 17 | --     | --   |
|            | Ca(ICC2/PI489777)SNP_07916 | 6040 | G | A | 38 | 17 | --     | --   |
|            | Ca(ICC2/PI489777)SNP_07917 | 6549 | T | G | 21 | 10 | --     | --   |
| CakTC37542 | Ca(ICC2/PI489777)SNP_07918 | 980  | G | C | 13 | 16 | --     | --   |
|            | Ca(ICC2/PI489777)SNP_07919 | 1012 | G | C | 15 | 16 | --     | --   |
| CakTC06591 | Ca(ICC2/PI489777)SNP_07920 | 920  | T | C | 10 | 15 | --     | --   |
|            | Ca(ICC2/PI489777)SNP_07921 | 1056 | A | G | 16 | 8  | --     | --   |
| CakTC10833 | Ca(ICC2/PI489777)SNP_07922 | 681  | C | T | 26 | 22 | --     | --   |
| CakTC09098 | Ca(ICC2/PI489777)SNP_07923 | 2819 | T | C | 3  | 8  | --     | --   |
|            | Ca(ICC2/PI489777)SNP_07924 | 2847 | T | C | 3  | 7  | --     | --   |
|            | Ca(ICC2/PI489777)SNP_07925 | 2852 | T | C | 3  | 7  | --     | --   |
| CakTC23197 | Ca(ICC2/PI489777)SNP_07926 | 2274 | T | C | 7  | 4  | Mature | Leaf |
| CakTC34470 | Ca(ICC2/PI489777)SNP_07927 | 1871 | G | A | 3  | 4  | --     | --   |
|            | Ca(ICC2/PI489777)SNP_07928 | 1944 | T | C | 3  | 3  | --     | --   |
| CakTC42441 | Ca(ICC2/PI489777)SNP_07929 | 184  | G | T | 14 | 3  | --     | --   |
|            | Ca(ICC2/PI489777)SNP_07930 | 694  | C | A | 3  | 3  | --     | --   |
| CakTC10516 | Ca(ICC2/PI489777)SNP_07931 | 48   | A | G | 5  | 4  | --     | --   |
|            | Ca(ICC2/PI489777)SNP_07932 | 133  | A | C | 8  | 5  | --     | --   |
| CakTC31064 | Ca(ICC2/PI489777)SNP_07933 | 1899 | G | A | 9  | 7  | --     | --   |
|            | Ca(ICC2/PI489777)SNP_07934 | 1907 | G | A | 8  | 7  | --     | --   |
| CakTC42545 | Ca(ICC2/PI489777)SNP_07935 | 219  | A | C | 15 | 5  | Flower | bud  |
|            | Ca(ICC2/PI489777)SNP_07936 | 561  | A | T | 21 | 5  | Flower | bud  |
|            | Ca(ICC2/PI489777)SNP_07937 | 618  | A | G | 23 | 4  | Flower | bud  |
|            | Ca(ICC2/PI489777)SNP_07938 | 675  | A | T | 24 | 4  | Flower | bud  |
|            | Ca(ICC2/PI489777)SNP_07939 | 1311 | G | A | 14 | 6  | Flower | bud  |
|            | Ca(ICC2/PI489777)SNP_07940 | 1704 | T | G | 4  | 3  | Flower | bud  |
| CakTC10020 | Ca(ICC2/PI489777)SNP_07941 | 3238 | A | T | 18 | 4  | --     | TPR  |
| CakTC10084 | Ca(ICC2/PI489777)SNP_07942 | 1515 | C | A | 4  | 4  | --     | --   |
| CakTC41977 | Ca(ICC2/PI489777)SNP_07943 | 142  | T | C | 12 | 8  | --     | --   |
|            | Ca(ICC2/PI489777)SNP_07944 | 233  | G | A | 30 | 15 | --     | --   |
| CakTC42015 | Ca(ICC2/PI489777)SNP_07945 | 662  | A | G | 6  | 5  | --     | --   |
|            | Ca(ICC2/PI489777)SNP_07946 | 763  | A | T | 5  | 5  | --     | --   |
|            | Ca(ICC2/PI489777)SNP_07947 | 797  | G | A | 5  | 4  | --     | --   |
| CakTC09512 | Ca(ICC2/PI489777)SNP_07948 | 186  | T | G | 8  | 3  | --     | --   |
|            | Ca(ICC2/PI489777)SNP_07949 | 192  | C | G | 6  | 3  | --     | --   |
|            | Ca(ICC2/PI489777)SNP_07950 | 418  | C | T | 12 | 6  | --     | --   |
|            | Ca(ICC2/PI489777)SNP_07951 | 502  | T | C | 17 | 6  | --     | --   |
| CakTC11129 | Ca(ICC2/PI489777)SNP_07952 | 727  | A | T | 5  | 3  | --     | --   |
|            | Ca(ICC2/PI489777)SNP_07953 | 771  | A | G | 6  | 3  | --     | --   |
|            | Ca(ICC2/PI489777)SNP_07954 | 904  | G | A | 5  | 8  | --     | --   |
|            | Ca(ICC2/PI489777)SNP_07955 | 1003 | A | T | 9  | 8  | --     | --   |
|            | Ca(ICC2/PI489777)SNP_07956 | 1164 | C | T | 8  | 9  | --     | --   |
|            | Ca(ICC2/PI489777)SNP_07957 | 1197 | A | G | 9  | 9  | --     | --   |
|            | Ca(ICC2/PI489777)SNP_07958 | 1459 | A | G | 7  | 3  | --     | --   |
|            | Ca(ICC2/PI489777)SNP_07959 | 2108 | A | G | 5  | 5  | --     | --   |
|            | Ca(ICC2/PI489777)SNP_07960 | 2248 | G | C | 7  | 4  | --     | --   |
|            | Ca(ICC2/PI489777)SNP_07961 | 2262 | C | G | 7  | 4  | --     | --   |
|            | Ca(ICC2/PI489777)SNP_07962 | 2295 | G | T | 5  | 4  | --     | --   |
|            | Ca(ICC2/PI489777)SNP_07963 | 2406 | T | C | 8  | 5  | --     | --   |
|            | Ca(ICC2/PI489777)SNP_07964 | 2642 | G | A | 7  | 3  | --     | --   |
| CakTC42091 | Ca(ICC2/PI489777)SNP_07965 | 853  | T | C | 5  | 7  | --     | GNAT |
| CakTC40610 | Ca(ICC2/PI489777)SNP_07966 | 191  | T | C | 8  | 7  | --     | --   |
|            | Ca(ICC2/PI489777)SNP_07967 | 309  | A | C | 10 | 7  | --     | --   |
| CakTC27091 | Ca(ICC2/PI489777)SNP_07968 | 471  | G | A | 15 | 10 | --     | --   |
| CakTC38003 | Ca(ICC2/PI489777)SNP_07969 | 446  | T | C | 9  | 3  | --     | --   |
| CakTC41490 | Ca(ICC2/PI489777)SNP_07970 | 718  | A | G | 7  | 8  | --     | --   |
|            | Ca(ICC2/PI489777)SNP_07971 | 1056 | C | T | 14 | 8  | --     | --   |
|            | Ca(ICC2/PI489777)SNP_07972 | 1371 | C | G | 17 | 10 | --     | --   |
| CakTC32821 | Ca(ICC2/PI489777)SNP_07973 | 582  | A | G | 5  | 4  | --     | --   |
|            | Ca(ICC2/PI489777)SNP_07974 | 666  | C | T | 8  | 6  | --     | --   |
|            | Ca(ICC2/PI489777)SNP_07975 | 1910 | G | T | 5  | 3  | --     | --   |
| CakTC38711 | Ca(ICC2/PI489777)SNP_07976 | 464  | T | G | 9  | 8  | --     | --   |
|            | Ca(ICC2/PI489777)SNP_07977 | 570  | A | G | 13 | 4  | --     | --   |
|            | Ca(ICC2/PI489777)SNP_07978 | 717  | C | T | 14 | 6  | --     | --   |
|            | Ca(ICC2/PI489777)SNP_07979 | 844  | C | G | 17 | 3  | --     | --   |
|            | Ca(ICC2/PI489777)SNP_07980 | 1110 | G | C | 14 | 11 | --     | --   |
| CakTC33300 | Ca(ICC2/PI489777)SNP_07981 | 419  | C | A | 12 | 9  | --     | --   |
|            | Ca(ICC2/PI489777)SNP_07982 | 1238 | A | G | 10 | 9  | --     | --   |
| CakTC41898 | Ca(ICC2/PI489777)SNP_07983 | 353  | A | T | 19 | 5  | --     | --   |
|            | Ca(ICC2/PI489777)SNP_07984 | 363  | G | A | 15 | 5  | --     | --   |
| CakTC11238 | Ca(ICC2/PI489777)SNP_07985 | 790  | C | T | 8  | 4  | --     | --   |
| CakTC27632 | Ca(ICC2/PI489777)SNP_07986 | 59   | C | G | 43 | 25 | --     | --   |
|            | Ca(ICC2/PI489777)SNP_07987 | 322  | G | T | 64 | 36 | --     | --   |

|            |                            |      |   |   |     |     |    |       |
|------------|----------------------------|------|---|---|-----|-----|----|-------|
| CakTC34617 | Ca(ICC2/PI489777)SNP_07988 | 209  | C | T | 41  | 27  | -- | --    |
|            | Ca(ICC2/PI489777)SNP_07989 | 230  | A | G | 41  | 29  | -- | --    |
|            | Ca(ICC2/PI489777)SNP_07990 | 524  | T | C | 43  | 26  | -- | --    |
| CakTC36011 | Ca(ICC2/PI489777)SNP_07991 | 1280 | A | G | 16  | 9   | -- | --    |
|            | Ca(ICC2/PI489777)SNP_07992 | 1856 | A | T | 28  | 9   | -- | --    |
|            | Ca(ICC2/PI489777)SNP_07993 | 2225 | T | C | 27  | 7   | -- | --    |
|            | Ca(ICC2/PI489777)SNP_07994 | 2381 | T | C | 34  | 9   | -- | --    |
|            | Ca(ICC2/PI489777)SNP_07995 | 2395 | A | G | 34  | 9   | -- | --    |
| CakTC24574 | Ca(ICC2/PI489777)SNP_07996 | 757  | C | G | 91  | 31  | -- | --    |
|            | Ca(ICC2/PI489777)SNP_07997 | 777  | C | A | 74  | 19  | -- | --    |
| CakTC07053 | Ca(ICC2/PI489777)SNP_07998 | 813  | G | T | 6   | 6   | -- | --    |
|            | Ca(ICC2/PI489777)SNP_07999 | 861  | T | A | 6   | 4   | -- | --    |
|            | Ca(ICC2/PI489777)SNP_08000 | 1077 | G | A | 12  | 6   | -- | --    |
|            | Ca(ICC2/PI489777)SNP_08001 | 1230 | T | C | 12  | 3   | -- | --    |
|            | Ca(ICC2/PI489777)SNP_08002 | 1446 | A | T | 4   | 4   | -- | --    |
| CakTC24743 | Ca(ICC2/PI489777)SNP_08003 | 120  | C | A | 16  | 7   | -- | --    |
| CakTC39652 | Ca(ICC2/PI489777)SNP_08004 | 573  | T | C | 8   | 3   | -- | CCAAT |
|            | Ca(ICC2/PI489777)SNP_08005 | 703  | C | T | 15  | 6   | -- | CCAAT |
|            | Ca(ICC2/PI489777)SNP_08006 | 960  | C | A | 27  | 15  | -- | CCAAT |
|            | Ca(ICC2/PI489777)SNP_08007 | 1683 | G | C | 13  | 3   | -- | CCAAT |
| CakTC24201 | Ca(ICC2/PI489777)SNP_08008 | 470  | A | G | 20  | 14  | -- | --    |
|            | Ca(ICC2/PI489777)SNP_08009 | 686  | G | A | 31  | 11  | -- | --    |
|            | Ca(ICC2/PI489777)SNP_08010 | 1268 | C | T | 28  | 14  | -- | --    |
|            | Ca(ICC2/PI489777)SNP_08011 | 2075 | T | C | 16  | 3   | -- | --    |
| CakTC30497 | Ca(ICC2/PI489777)SNP_08012 | 904  | G | A | 5   | 3   | -- | --    |
| CakTC23325 | Ca(ICC2/PI489777)SNP_08013 | 489  | G | A | 365 | 185 | -- | --    |
|            | Ca(ICC2/PI489777)SNP_08014 | 579  | G | A | 354 | 198 | -- | --    |
|            | Ca(ICC2/PI489777)SNP_08015 | 1059 | G | A | 105 | 36  | -- | --    |
|            | Ca(ICC2/PI489777)SNP_08016 | 2305 | T | C | 111 | 62  | -- | --    |
| CakTC24526 | Ca(ICC2/PI489777)SNP_08017 | 860  | A | G | 6   | 3   | -- | --    |
| CakTC28052 | Ca(ICC2/PI489777)SNP_08018 | 157  | A | G | 7   | 5   | -- | --    |
|            | Ca(ICC2/PI489777)SNP_08019 | 568  | C | T | 43  | 18  | -- | --    |
|            | Ca(ICC2/PI489777)SNP_08020 | 665  | A | G | 45  | 27  | -- | --    |
|            | Ca(ICC2/PI489777)SNP_08021 | 918  | C | T | 32  | 29  | -- | --    |
| CakTC31743 | Ca(ICC2/PI489777)SNP_08022 | 476  | C | T | 4   | 5   | -- | --    |
|            | Ca(ICC2/PI489777)SNP_08023 | 512  | T | G | 6   | 5   | -- | --    |
|            | Ca(ICC2/PI489777)SNP_08024 | 583  | G | A | 6   | 5   | -- | --    |
|            | Ca(ICC2/PI489777)SNP_08025 | 619  | T | C | 7   | 8   | -- | --    |
|            | Ca(ICC2/PI489777)SNP_08026 | 677  | T | G | 7   | 9   | -- | --    |
|            | Ca(ICC2/PI489777)SNP_08027 | 866  | G | A | 10  | 12  | -- | --    |
|            | Ca(ICC2/PI489777)SNP_08028 | 893  | C | T | 8   | 14  | -- | --    |
|            | Ca(ICC2/PI489777)SNP_08029 | 1144 | T | C | 3   | 7   | -- | --    |
|            | Ca(ICC2/PI489777)SNP_08030 | 1145 | G | A | 3   | 6   | -- | --    |
| CakTC24247 | Ca(ICC2/PI489777)SNP_08031 | 1387 | T | C | 7   | 5   | -- | --    |
| CakTC33434 | Ca(ICC2/PI489777)SNP_08032 | 470  | T | C | 24  | 11  | -- | --    |
|            | Ca(ICC2/PI489777)SNP_08033 | 647  | T | C | 32  | 17  | -- | --    |
|            | Ca(ICC2/PI489777)SNP_08034 | 949  | T | C | 23  | 15  | -- | --    |
|            | Ca(ICC2/PI489777)SNP_08035 | 1899 | C | G | 11  | 9   | -- | --    |
| CakTC39550 | Ca(ICC2/PI489777)SNP_08036 | 467  | C | T | 6   | 3   | -- | --    |
|            | Ca(ICC2/PI489777)SNP_08037 | 752  | C | T | 12  | 6   | -- | --    |
| CakTC27366 | Ca(ICC2/PI489777)SNP_08038 | 430  | A | T | 36  | 13  | -- | --    |
|            | Ca(ICC2/PI489777)SNP_08039 | 535  | T | C | 35  | 19  | -- | --    |
| CakTC37794 | Ca(ICC2/PI489777)SNP_08040 | 588  | C | T | 9   | 8   | -- | --    |
| CakTC40063 | Ca(ICC2/PI489777)SNP_08041 | 428  | C | G | 13  | 3   | -- | TPR   |
| CakTC39696 | Ca(ICC2/PI489777)SNP_08042 | 156  | A | T | 3   | 4   | -- | --    |
| CakTC37134 | Ca(ICC2/PI489777)SNP_08043 | 692  | T | A | 13  | 5   | -- | --    |
|            | Ca(ICC2/PI489777)SNP_08044 | 758  | A | G | 16  | 6   | -- | --    |
|            | Ca(ICC2/PI489777)SNP_08045 | 957  | A | C | 9   | 9   | -- | --    |
|            | Ca(ICC2/PI489777)SNP_08046 | 1022 | G | T | 11  | 7   | -- | --    |
|            | Ca(ICC2/PI489777)SNP_08047 | 1064 | G | C | 15  | 6   | -- | --    |
|            | Ca(ICC2/PI489777)SNP_08048 | 1173 | T | G | 12  | 4   | -- | --    |
|            | Ca(ICC2/PI489777)SNP_08049 | 1271 | G | A | 16  | 4   | -- | --    |
| CakTC31587 | Ca(ICC2/PI489777)SNP_08050 | 3365 | A | G | 15  | 3   | -- | --    |
| CakTC42341 | Ca(ICC2/PI489777)SNP_08051 | 808  | G | A | 31  | 19  | -- | --    |
| CakTC31779 | Ca(ICC2/PI489777)SNP_08052 | 200  | G | A | 62  | 87  | -- | --    |
| CakTC24871 | Ca(ICC2/PI489777)SNP_08053 | 127  | C | G | 9   | 11  | -- | --    |
|            | Ca(ICC2/PI489777)SNP_08054 | 141  | T | C | 9   | 12  | -- | --    |
|            | Ca(ICC2/PI489777)SNP_08055 | 1561 | G | A | 16  | 13  | -- | --    |
|            | Ca(ICC2/PI489777)SNP_08056 | 1943 | A | T | 10  | 4   | -- | --    |
|            | Ca(ICC2/PI489777)SNP_08057 | 1944 | A | C | 10  | 3   | -- | --    |
|            | Ca(ICC2/PI489777)SNP_08058 | 2429 | G | A | 8   | 7   | -- | --    |
|            | Ca(ICC2/PI489777)SNP_08059 | 2467 | T | A | 7   | 9   | -- | --    |
|            | Ca(ICC2/PI489777)SNP_08060 | 2837 | C | A | 11  | 8   | -- | --    |
|            | Ca(ICC2/PI489777)SNP_08061 | 2978 | T | C | 8   | 8   | -- | --    |

|            |                             |      |   |   |    |    |           |      |
|------------|-----------------------------|------|---|---|----|----|-----------|------|
|            | Ca(ICCV2/PI489777)SNP_08062 | 3090 | A | G | 5  | 5  | --        | --   |
| CakTC39250 | Ca(ICCV2/PI489777)SNP_08063 | 563  | C | T | 16 | 6  | --        | --   |
|            | Ca(ICCV2/PI489777)SNP_08064 | 1217 | C | T | 3  | 18 | --        | --   |
| CakTC22316 | Ca(ICCV2/PI489777)SNP_08065 | 403  | T | G | 21 | 12 | --        | --   |
|            | Ca(ICCV2/PI489777)SNP_08066 | 1354 | C | T | 14 | 13 | --        | --   |
|            | Ca(ICCV2/PI489777)SNP_08067 | 2083 | G | A | 4  | 5  | --        | --   |
|            | Ca(ICCV2/PI489777)SNP_08068 | 2509 | C | A | 8  | 14 | --        | --   |
|            | Ca(ICCV2/PI489777)SNP_08069 | 2625 | G | C | 3  | 10 | --        | --   |
| CakTC23610 | Ca(ICCV2/PI489777)SNP_08070 | 364  | T | C | 7  | 10 | --        | --   |
|            | Ca(ICCV2/PI489777)SNP_08071 | 1412 | C | A | 10 | 6  | --        | --   |
|            | Ca(ICCV2/PI489777)SNP_08072 | 1537 | A | T | 12 | 8  | --        | --   |
|            | Ca(ICCV2/PI489777)SNP_08073 | 1572 | C | T | 14 | 9  | --        | --   |
|            | Ca(ICCV2/PI489777)SNP_08074 | 1576 | G | A | 13 | 11 | --        | --   |
|            | Ca(ICCV2/PI489777)SNP_08075 | 1746 | C | A | 9  | 12 | --        | --   |
|            | Ca(ICCV2/PI489777)SNP_08076 | 1928 | G | A | 9  | 7  | --        | --   |
|            | Ca(ICCV2/PI489777)SNP_08077 | 2005 | G | A | 8  | 8  | --        | --   |
|            | Ca(ICCV2/PI489777)SNP_08078 | 2071 | C | T | 15 | 9  | --        | --   |
|            | Ca(ICCV2/PI489777)SNP_08079 | 2152 | G | A | 19 | 9  | --        | --   |
|            | Ca(ICCV2/PI489777)SNP_08080 | 2250 | C | G | 22 | 8  | --        | --   |
|            | Ca(ICCV2/PI489777)SNP_08081 | 2290 | A | T | 23 | 8  | --        | --   |
|            | Ca(ICCV2/PI489777)SNP_08082 | 2296 | T | A | 24 | 8  | --        | --   |
|            | Ca(ICCV2/PI489777)SNP_08083 | 2323 | A | G | 24 | 6  | --        | --   |
| CakTC26121 | Ca(ICCV2/PI489777)SNP_08084 | 1472 | T | C | 6  | 5  | --        | --   |
| CakTC38920 | Ca(ICCV2/PI489777)SNP_08085 | 90   | C | A | 23 | 16 | --        | --   |
|            | Ca(ICCV2/PI489777)SNP_08086 | 163  | C | A | 38 | 37 | --        | --   |
|            | Ca(ICCV2/PI489777)SNP_08087 | 286  | C | A | 45 | 34 | --        | --   |
|            | Ca(ICCV2/PI489777)SNP_08088 | 371  | T | C | 46 | 38 | --        | --   |
|            | Ca(ICCV2/PI489777)SNP_08089 | 1053 | C | G | 34 | 18 | --        | --   |
| CakTC25164 | Ca(ICCV2/PI489777)SNP_08090 | 618  | T | C | 3  | 4  | --        | --   |
|            | Ca(ICCV2/PI489777)SNP_08091 | 638  | C | T | 3  | 4  | --        | --   |
| CakTC40074 | Ca(ICCV2/PI489777)SNP_08092 | 1008 | C | T | 34 | 5  | --        | --   |
|            | Ca(ICCV2/PI489777)SNP_08093 | 1043 | G | A | 33 | 5  | --        | --   |
|            | Ca(ICCV2/PI489777)SNP_08094 | 1098 | G | C | 32 | 5  | --        | --   |
| CakTC31387 | Ca(ICCV2/PI489777)SNP_08095 | 606  | T | C | 4  | 4  | --        | FAR1 |
|            | Ca(ICCV2/PI489777)SNP_08096 | 1078 | G | A | 9  | 3  | --        | FAR1 |
| CakTC32263 | Ca(ICCV2/PI489777)SNP_08097 | 264  | C | A | 4  | 6  | --        | --   |
| CakTC39351 | Ca(ICCV2/PI489777)SNP_08098 | 1299 | T | C | 3  | 4  | --        | --   |
| CakTC28950 | Ca(ICCV2/PI489777)SNP_08099 | 593  | T | C | 6  | 8  | --        | --   |
|            | Ca(ICCV2/PI489777)SNP_08100 | 799  | C | T | 6  | 3  | --        | --   |
| CakTC34806 | Ca(ICCV2/PI489777)SNP_08101 | 382  | G | T | 4  | 6  | --        | --   |
|            | Ca(ICCV2/PI489777)SNP_08102 | 403  | G | A | 4  | 6  | --        | --   |
|            | Ca(ICCV2/PI489777)SNP_08103 | 535  | G | A | 4  | 6  | --        | --   |
|            | Ca(ICCV2/PI489777)SNP_08104 | 537  | C | T | 4  | 6  | --        | --   |
| CakTC38253 | Ca(ICCV2/PI489777)SNP_08105 | 103  | A | T | 4  | 6  | --        | --   |
|            | Ca(ICCV2/PI489777)SNP_08106 | 393  | T | G | 26 | 18 | --        | --   |
|            | Ca(ICCV2/PI489777)SNP_08107 | 516  | A | G | 27 | 18 | --        | --   |
|            | Ca(ICCV2/PI489777)SNP_08108 | 714  | C | A | 19 | 24 | --        | --   |
|            | Ca(ICCV2/PI489777)SNP_08109 | 846  | C | G | 24 | 18 | --        | --   |
|            | Ca(ICCV2/PI489777)SNP_08110 | 1056 | T | A | 28 | 35 | --        | --   |
| CakTC27081 | Ca(ICCV2/PI489777)SNP_08111 | 875  | C | T | 95 | 51 | --        | --   |
| CakTC22937 | Ca(ICCV2/PI489777)SNP_08112 | 355  | A | T | 24 | 34 | --        | --   |
|            | Ca(ICCV2/PI489777)SNP_08113 | 486  | C | G | 29 | 25 | --        | --   |
|            | Ca(ICCV2/PI489777)SNP_08114 | 508  | T | C | 31 | 29 | --        | --   |
|            | Ca(ICCV2/PI489777)SNP_08115 | 634  | C | T | 19 | 16 | --        | --   |
|            | Ca(ICCV2/PI489777)SNP_08116 | 2591 | C | T | 17 | 6  | --        | --   |
|            | Ca(ICCV2/PI489777)SNP_08117 | 3479 | A | G | 5  | 3  | --        | --   |
| CakTC27448 | Ca(ICCV2/PI489777)SNP_08118 | 1001 | A | T | 6  | 13 | --        | --   |
| CakTC29936 | Ca(ICCV2/PI489777)SNP_08119 | 792  | T | C | 9  | 3  | Young_pod | --   |
|            | Ca(ICCV2/PI489777)SNP_08120 | 1052 | C | A | 11 | 3  | Young_pod | --   |
|            | Ca(ICCV2/PI489777)SNP_08121 | 1071 | A | C | 9  | 4  | Young_pod | --   |
|            | Ca(ICCV2/PI489777)SNP_08122 | 1109 | A | T | 9  | 5  | Young_pod | --   |
|            | Ca(ICCV2/PI489777)SNP_08123 | 1173 | T | G | 9  | 5  | Young_pod | --   |
|            | Ca(ICCV2/PI489777)SNP_08124 | 1201 | A | T | 8  | 5  | Young_pod | --   |
|            | Ca(ICCV2/PI489777)SNP_08125 | 1242 | T | C | 9  | 4  | Young_pod | --   |
| CakTC41687 | Ca(ICCV2/PI489777)SNP_08126 | 934  | T | C | 6  | 3  | --        | --   |
|            | Ca(ICCV2/PI489777)SNP_08127 | 1593 | G | T | 3  | 7  | --        | --   |
|            | Ca(ICCV2/PI489777)SNP_08128 | 1805 | T | C | 5  | 7  | --        | --   |
| CakTC26837 | Ca(ICCV2/PI489777)SNP_08129 | 834  | C | T | 4  | 3  | --        | --   |
| CakTC27404 | Ca(ICCV2/PI489777)SNP_08130 | 413  | A | C | 8  | 12 | --        | --   |
|            | Ca(ICCV2/PI489777)SNP_08131 | 479  | A | C | 11 | 12 | --        | --   |
|            | Ca(ICCV2/PI489777)SNP_08132 | 2049 | C | T | 13 | 11 | --        | --   |
|            | Ca(ICCV2/PI489777)SNP_08133 | 3096 | C | A | 11 | 4  | --        | --   |
| CakTC26395 | Ca(ICCV2/PI489777)SNP_08134 | 194  | C | T | 5  | 3  | --        | --   |
| CakTC34208 | Ca(ICCV2/PI489777)SNP_08135 | 587  | C | T | 7  | 8  | --        | --   |

|            |                             |      |   |   |    |    |       |      |
|------------|-----------------------------|------|---|---|----|----|-------|------|
|            | Ca(ICCV2/PI489777)SNP_08136 | 1280 | G | T | 4  | 4  | --    | --   |
|            | Ca(ICCV2/PI489777)SNP_08137 | 1286 | A | C | 5  | 4  | --    | --   |
|            | Ca(ICCV2/PI489777)SNP_08138 | 1938 | G | A | 4  | 4  | --    | --   |
| CakTC23413 | Ca(ICCV2/PI489777)SNP_08139 | 338  | T | C | 15 | 4  | --    | --   |
| CakTC27343 | Ca(ICCV2/PI489777)SNP_08140 | 729  | G | A | 51 | 16 | --    | BES1 |
|            | Ca(ICCV2/PI489777)SNP_08141 | 1074 | T | C | 72 | 29 | --    | BES1 |
| CakTC23032 | Ca(ICCV2/PI489777)SNP_08142 | 263  | G | C | 6  | 3  | --    | --   |
| CakTC38855 | Ca(ICCV2/PI489777)SNP_08143 | 701  | G | A | 5  | 3  | --    | --   |
|            | Ca(ICCV2/PI489777)SNP_08144 | 788  | C | T | 3  | 4  | --    | --   |
| CakTC38957 | Ca(ICCV2/PI489777)SNP_08145 | 287  | A | G | 9  | 3  | --    | --   |
| CakTC08131 | Ca(ICCV2/PI489777)SNP_08146 | 2131 | C | T | 4  | 4  | --    | --   |
|            | Ca(ICCV2/PI489777)SNP_08147 | 2152 | T | A | 4  | 5  | --    | --   |
|            | Ca(ICCV2/PI489777)SNP_08148 | 2234 | T | C | 4  | 5  | --    | --   |
|            | Ca(ICCV2/PI489777)SNP_08149 | 2366 | G | A | 3  | 4  | --    | --   |
|            | Ca(ICCV2/PI489777)SNP_08150 | 2375 | T | C | 3  | 3  | --    | --   |
| CakTC36937 | Ca(ICCV2/PI489777)SNP_08151 | 1170 | G | A | 21 | 14 | --    | --   |
|            | Ca(ICCV2/PI489777)SNP_08152 | 1190 | A | C | 16 | 15 | --    | --   |
|            | Ca(ICCV2/PI489777)SNP_08153 | 1432 | G | A | 31 | 15 | --    | --   |
|            | Ca(ICCV2/PI489777)SNP_08154 | 1443 | T | C | 31 | 14 | --    | --   |
|            | Ca(ICCV2/PI489777)SNP_08155 | 1694 | A | T | 46 | 16 | --    | --   |
|            | Ca(ICCV2/PI489777)SNP_08156 | 2207 | C | T | 21 | 16 | --    | --   |
| CakTC25907 | Ca(ICCV2/PI489777)SNP_08157 | 330  | G | A | 4  | 3  | --    | --   |
| CakTC42678 | Ca(ICCV2/PI489777)SNP_08158 | 821  | C | T | 5  | 6  | --    | --   |
| CakTC43324 | Ca(ICCV2/PI489777)SNP_08159 | 235  | C | G | 87 | 65 | --    | --   |
|            | Ca(ICCV2/PI489777)SNP_08160 | 747  | C | A | 45 | 41 | --    | --   |
|            | Ca(ICCV2/PI489777)SNP_08161 | 755  | T | G | 29 | 37 | --    | --   |
| CakTC38721 | Ca(ICCV2/PI489777)SNP_08162 | 1274 | T | G | 18 | 22 | --    | --   |
| CakTC42588 | Ca(ICCV2/PI489777)SNP_08163 | 908  | G | T | 83 | 72 | --    | --   |
| CakTC29779 | Ca(ICCV2/PI489777)SNP_08164 | 377  | T | C | 3  | 9  | --    | --   |
|            | Ca(ICCV2/PI489777)SNP_08165 | 485  | G | A | 4  | 7  | --    | --   |
|            | Ca(ICCV2/PI489777)SNP_08166 | 1352 | T | C | 12 | 4  | --    | --   |
|            | Ca(ICCV2/PI489777)SNP_08167 | 1422 | A | T | 10 | 4  | --    | --   |
| CakTC28462 | Ca(ICCV2/PI489777)SNP_08168 | 610  | G | T | 77 | 32 | --    | --   |
|            | Ca(ICCV2/PI489777)SNP_08169 | 792  | T | G | 77 | 28 | --    | --   |
|            | Ca(ICCV2/PI489777)SNP_08170 | 891  | A | T | 83 | 35 | --    | --   |
|            | Ca(ICCV2/PI489777)SNP_08171 | 1041 | C | T | 97 | 47 | --    | --   |
|            | Ca(ICCV2/PI489777)SNP_08172 | 1045 | A | G | 90 | 53 | --    | --   |
|            | Ca(ICCV2/PI489777)SNP_08173 | 1715 | T | C | 4  | 3  | --    | --   |
|            | Ca(ICCV2/PI489777)SNP_08174 | 1748 | T | C | 3  | 3  | --    | --   |
| CakTC29821 | Ca(ICCV2/PI489777)SNP_08175 | 473  | C | T | 3  | 3  | Shoot | --   |
|            | Ca(ICCV2/PI489777)SNP_08176 | 1052 | A | T | 3  | 3  | Shoot | --   |
| CakTC09754 | Ca(ICCV2/PI489777)SNP_08177 | 795  | A | G | 8  | 4  | --    | --   |
| CakTC26888 | Ca(ICCV2/PI489777)SNP_08178 | 1102 | C | G | 3  | 4  | --    | --   |
|            | Ca(ICCV2/PI489777)SNP_08179 | 1117 | T | G | 3  | 4  | --    | --   |
| CakTC26789 | Ca(ICCV2/PI489777)SNP_08180 | 275  | T | A | 13 | 11 | --    | --   |
|            | Ca(ICCV2/PI489777)SNP_08181 | 509  | T | G | 13 | 6  | --    | --   |
|            | Ca(ICCV2/PI489777)SNP_08182 | 1583 | T | C | 14 | 4  | --    | --   |
| CakTC29652 | Ca(ICCV2/PI489777)SNP_08183 | 1829 | T | A | 4  | 5  | --    | --   |
|            | Ca(ICCV2/PI489777)SNP_08184 | 1832 | A | T | 4  | 5  | --    | --   |
|            | Ca(ICCV2/PI489777)SNP_08185 | 1949 | C | A | 3  | 4  | --    | --   |
| CakTC39509 | Ca(ICCV2/PI489777)SNP_08186 | 145  | T | A | 4  | 14 | --    | --   |
|            | Ca(ICCV2/PI489777)SNP_08187 | 431  | T | C | 17 | 11 | --    | --   |
|            | Ca(ICCV2/PI489777)SNP_08188 | 632  | A | G | 18 | 19 | --    | --   |
| CakTC31925 | Ca(ICCV2/PI489777)SNP_08189 | 862  | C | T | 4  | 3  | --    | --   |
| CakTC39998 | Ca(ICCV2/PI489777)SNP_08190 | 376  | G | C | 8  | 3  | --    | --   |
|            | Ca(ICCV2/PI489777)SNP_08191 | 653  | C | T | 8  | 4  | --    | --   |
|            | Ca(ICCV2/PI489777)SNP_08192 | 713  | G | A | 13 | 5  | --    | --   |
|            | Ca(ICCV2/PI489777)SNP_08193 | 950  | G | C | 16 | 5  | --    | --   |
|            | Ca(ICCV2/PI489777)SNP_08194 | 988  | C | A | 10 | 5  | --    | --   |
|            | Ca(ICCV2/PI489777)SNP_08195 | 1102 | G | A | 7  | 3  | --    | --   |
| CakTC28873 | Ca(ICCV2/PI489777)SNP_08196 | 526  | C | G | 6  | 7  | --    | --   |
|            | Ca(ICCV2/PI489777)SNP_08197 | 672  | A | G | 3  | 3  | --    | --   |
|            | Ca(ICCV2/PI489777)SNP_08198 | 1840 | C | T | 3  | 7  | --    | --   |
| CakTC42477 | Ca(ICCV2/PI489777)SNP_08199 | 940  | T | C | 22 | 8  | --    | --   |
|            | Ca(ICCV2/PI489777)SNP_08200 | 1156 | A | G | 16 | 8  | --    | --   |
|            | Ca(ICCV2/PI489777)SNP_08201 | 1261 | A | C | 20 | 9  | --    | --   |
|            | Ca(ICCV2/PI489777)SNP_08202 | 1340 | G | C | 15 | 9  | --    | --   |
|            | Ca(ICCV2/PI489777)SNP_08203 | 1341 | C | A | 14 | 9  | --    | --   |
|            | Ca(ICCV2/PI489777)SNP_08204 | 1358 | A | G | 14 | 9  | --    | --   |
|            | Ca(ICCV2/PI489777)SNP_08205 | 1443 | G | T | 10 | 8  | --    | --   |
| CakTC23186 | Ca(ICCV2/PI489777)SNP_08206 | 487  | G | C | 8  | 24 | --    | --   |
|            | Ca(ICCV2/PI489777)SNP_08207 | 1365 | T | C | 13 | 13 | --    | --   |
| CakTC09539 | Ca(ICCV2/PI489777)SNP_08208 | 988  | G | A | 12 | 6  | --    | --   |
| CakTC35669 | Ca(ICCV2/PI489777)SNP_08209 | 565  | G | T | 75 | 62 | --    | --   |

|            |                             |      |   |   |     |     |           |       |
|------------|-----------------------------|------|---|---|-----|-----|-----------|-------|
| CakTC02214 | Ca(ICCV2/PI489777)SNP_08210 | 34   | C | T | 18  | 18  | --        | CCAAT |
|            | Ca(ICCV2/PI489777)SNP_08211 | 124  | T | A | 35  | 25  | --        | CCAAT |
|            | Ca(ICCV2/PI489777)SNP_08212 | 157  | C | T | 40  | 32  | --        | CCAAT |
| CakTC25955 | Ca(ICCV2/PI489777)SNP_08213 | 335  | T | G | 69  | 133 | --        | --    |
|            | Ca(ICCV2/PI489777)SNP_08214 | 407  | G | T | 124 | 157 | --        | --    |
|            | Ca(ICCV2/PI489777)SNP_08215 | 838  | C | T | 103 | 112 | --        | --    |
| CakTC22320 | Ca(ICCV2/PI489777)SNP_08216 | 180  | A | G | 3   | 3   | --        | --    |
|            | Ca(ICCV2/PI489777)SNP_08217 | 767  | A | G | 15  | 7   | --        | --    |
|            | Ca(ICCV2/PI489777)SNP_08218 | 1075 | G | A | 5   | 6   | --        | --    |
| CakTC31466 | Ca(ICCV2/PI489777)SNP_08219 | 398  | G | A | 5   | 3   | Young_pod | --    |
|            | Ca(ICCV2/PI489777)SNP_08220 | 400  | C | T | 5   | 3   | Young_pod | --    |
|            | Ca(ICCV2/PI489777)SNP_08221 | 736  | T | C | 7   | 8   | Young_pod | --    |
| CakTC28971 | Ca(ICCV2/PI489777)SNP_08222 | 825  | C | T | 66  | 34  | --        | --    |
| CakTC22697 | Ca(ICCV2/PI489777)SNP_08223 | 1028 | A | T | 8   | 9   | --        | --    |
| CakTC33305 | Ca(ICCV2/PI489777)SNP_08224 | 131  | A | C | 4   | 11  | --        | --    |
| CakTC37291 | Ca(ICCV2/PI489777)SNP_08225 | 655  | T | C | 3   | 6   | --        | --    |
|            | Ca(ICCV2/PI489777)SNP_08226 | 910  | C | T | 10  | 5   | --        | --    |
|            | Ca(ICCV2/PI489777)SNP_08227 | 1075 | A | G | 9   | 5   | --        | --    |
| CakTC07782 | Ca(ICCV2/PI489777)SNP_08228 | 456  | T | C | 4   | 3   | --        | --    |
| CakTC13861 | Ca(ICCV2/PI489777)SNP_08229 | 183  | A | G | 3   | 3   | --        | --    |
| CakTC26153 | Ca(ICCV2/PI489777)SNP_08230 | 138  | G | A | 4   | 3   | Young_pod | --    |
|            | Ca(ICCV2/PI489777)SNP_08231 | 284  | A | C | 3   | 3   | Young_pod | --    |
|            | Ca(ICCV2/PI489777)SNP_08232 | 951  | C | T | 4   | 3   | Young_pod | --    |
| CakTC27224 | Ca(ICCV2/PI489777)SNP_08233 | 334  | G | A | 6   | 9   | --        | --    |
|            | Ca(ICCV2/PI489777)SNP_08234 | 337  | T | C | 6   | 9   | --        | --    |
|            | Ca(ICCV2/PI489777)SNP_08235 | 430  | T | A | 7   | 7   | --        | --    |
|            | Ca(ICCV2/PI489777)SNP_08236 | 444  | C | T | 7   | 7   | --        | --    |
|            | Ca(ICCV2/PI489777)SNP_08237 | 880  | C | T | 5   | 3   | --        | --    |
|            | Ca(ICCV2/PI489777)SNP_08238 | 1714 | C | G | 6   | 3   | --        | --    |
| CakTC36377 | Ca(ICCV2/PI489777)SNP_08239 | 1163 | A | G | 6   | 4   | --        | --    |
| CakTC10489 | Ca(ICCV2/PI489777)SNP_08240 | 248  | G | T | 21  | 10  | --        | FHA   |
|            | Ca(ICCV2/PI489777)SNP_08241 | 327  | C | A | 17  | 9   | --        | FHA   |
|            | Ca(ICCV2/PI489777)SNP_08242 | 335  | G | C | 21  | 12  | --        | FHA   |
|            | Ca(ICCV2/PI489777)SNP_08243 | 355  | A | G | 22  | 12  | --        | FHA   |
|            | Ca(ICCV2/PI489777)SNP_08244 | 473  | A | G | 21  | 13  | --        | FHA   |
|            | Ca(ICCV2/PI489777)SNP_08245 | 649  | C | T | 14  | 10  | --        | FHA   |
|            | Ca(ICCV2/PI489777)SNP_08246 | 778  | C | T | 10  | 4   | --        | FHA   |
| CakTC29402 | Ca(ICCV2/PI489777)SNP_08247 | 1101 | C | T | 6   | 8   | --        | --    |
|            | Ca(ICCV2/PI489777)SNP_08248 | 1115 | T | C | 6   | 7   | --        | --    |
|            | Ca(ICCV2/PI489777)SNP_08249 | 1152 | A | T | 5   | 8   | --        | --    |
|            | Ca(ICCV2/PI489777)SNP_08250 | 1178 | T | C | 6   | 7   | --        | --    |
| CakTC35501 | Ca(ICCV2/PI489777)SNP_08251 | 565  | T | A | 12  | 8   | --        | --    |
|            | Ca(ICCV2/PI489777)SNP_08252 | 782  | G | A | 16  | 11  | --        | --    |
|            | Ca(ICCV2/PI489777)SNP_08253 | 1172 | G | C | 4   | 4   | --        | --    |
|            | Ca(ICCV2/PI489777)SNP_08254 | 1882 | G | T | 11  | 6   | --        | --    |
|            | Ca(ICCV2/PI489777)SNP_08255 | 2168 | G | A | 7   | 9   | --        | --    |
|            | Ca(ICCV2/PI489777)SNP_08256 | 3221 | G | A | 22  | 6   | --        | --    |
|            | Ca(ICCV2/PI489777)SNP_08257 | 3807 | T | G | 8   | 4   | --        | --    |
| CakTC23934 | Ca(ICCV2/PI489777)SNP_08258 | 405  | C | T | 83  | 18  | --        | --    |
|            | Ca(ICCV2/PI489777)SNP_08259 | 2062 | C | A | 99  | 24  | --        | --    |
|            | Ca(ICCV2/PI489777)SNP_08260 | 2106 | T | G | 105 | 23  | --        | --    |
|            | Ca(ICCV2/PI489777)SNP_08261 | 3115 | T | A | 72  | 25  | --        | --    |
|            | Ca(ICCV2/PI489777)SNP_08262 | 3144 | T | G | 64  | 22  | --        | --    |
|            | Ca(ICCV2/PI489777)SNP_08263 | 3710 | C | G | 57  | 13  | --        | --    |
|            | Ca(ICCV2/PI489777)SNP_08264 | 3925 | A | G | 6   | 3   | --        | --    |
| CakTC31597 | Ca(ICCV2/PI489777)SNP_08265 | 87   | G | A | 7   | 12  | --        | --    |
|            | Ca(ICCV2/PI489777)SNP_08266 | 194  | T | C | 121 | 177 | --        | --    |
| CakTC24613 | Ca(ICCV2/PI489777)SNP_08267 | 583  | G | T | 20  | 11  | --        | --    |
|            | Ca(ICCV2/PI489777)SNP_08268 | 796  | G | T | 30  | 14  | --        | --    |
|            | Ca(ICCV2/PI489777)SNP_08269 | 3020 | G | A | 23  | 14  | --        | --    |
|            | Ca(ICCV2/PI489777)SNP_08270 | 3268 | T | C | 18  | 16  | --        | --    |
| CakTC30221 | Ca(ICCV2/PI489777)SNP_08271 | 256  | T | C | 8   | 3   | Flower    | bud   |
|            | Ca(ICCV2/PI489777)SNP_08272 | 277  | A | G | 9   | 3   | Flower    | bud   |
| CakTC40324 | Ca(ICCV2/PI489777)SNP_08273 | 248  | T | C | 5   | 5   | --        | --    |
|            | Ca(ICCV2/PI489777)SNP_08274 | 1406 | G | A | 11  | 11  | --        | --    |
| CakTC43220 | Ca(ICCV2/PI489777)SNP_08275 | 177  | A | G | 28  | 8   | --        | --    |
|            | Ca(ICCV2/PI489777)SNP_08276 | 737  | G | A | 18  | 13  | --        | --    |
|            | Ca(ICCV2/PI489777)SNP_08277 | 773  | G | A | 15  | 13  | --        | --    |
| CakTC26430 | Ca(ICCV2/PI489777)SNP_08278 | 507  | T | G | 26  | 3   | --        | --    |
|            | Ca(ICCV2/PI489777)SNP_08279 | 1407 | C | A | 10  | 6   | --        | --    |
| CakTC38383 | Ca(ICCV2/PI489777)SNP_08280 | 43   | A | G | 7   | 3   | --        | --    |
|            | Ca(ICCV2/PI489777)SNP_08281 | 167  | C | T | 10  | 8   | --        | --    |
|            | Ca(ICCV2/PI489777)SNP_08282 | 296  | A | G | 15  | 11  | --        | --    |
|            | Ca(ICCV2/PI489777)SNP_08283 | 399  | T | A | 12  | 8   | --        | --    |



|            |                            |      |   |   |    |    |    |    |
|------------|----------------------------|------|---|---|----|----|----|----|
|            | Ca(ICC2/PI489777)SNP_08284 | 495  | A | G | 8  | 5  | -- | -- |
| CakTC28071 | Ca(ICC2/PI489777)SNP_08285 | 127  | C | T | 55 | 45 | -- | -- |
| CakTC23735 | Ca(ICC2/PI489777)SNP_08286 | 1370 | C | T | 41 | 26 | -- | -- |
|            | Ca(ICC2/PI489777)SNP_08287 | 1519 | G | A | 36 | 23 | -- | -- |
| CakTC24509 | Ca(ICC2/PI489777)SNP_08288 | 337  | A | G | 16 | 14 | -- | -- |
|            | Ca(ICC2/PI489777)SNP_08289 | 343  | T | C | 21 | 15 | -- | -- |
|            | Ca(ICC2/PI489777)SNP_08290 | 1053 | A | G | 12 | 11 | -- | -- |
|            | Ca(ICC2/PI489777)SNP_08291 | 1337 | A | C | 6  | 7  | -- | -- |
|            | Ca(ICC2/PI489777)SNP_08292 | 1381 | A | T | 3  | 7  | -- | -- |
| CakTC35723 | Ca(ICC2/PI489777)SNP_08293 | 454  | T | C | 7  | 9  | -- | -- |
| CakTC29994 | Ca(ICC2/PI489777)SNP_08294 | 145  | A | G | 13 | 18 | -- | -- |
|            | Ca(ICC2/PI489777)SNP_08295 | 399  | T | C | 11 | 20 | -- | -- |
|            | Ca(ICC2/PI489777)SNP_08296 | 1309 | G | A | 16 | 23 | -- | -- |
|            | Ca(ICC2/PI489777)SNP_08297 | 1755 | A | C | 17 | 20 | -- | -- |
|            | Ca(ICC2/PI489777)SNP_08298 | 1842 | C | T | 9  | 19 | -- | -- |
|            | Ca(ICC2/PI489777)SNP_08299 | 2352 | A | T | 18 | 29 | -- | -- |
|            | Ca(ICC2/PI489777)SNP_08300 | 2829 | T | C | 16 | 20 | -- | -- |
|            | Ca(ICC2/PI489777)SNP_08301 | 3348 | T | C | 12 | 35 | -- | -- |
|            | Ca(ICC2/PI489777)SNP_08302 | 3352 | T | C | 14 | 37 | -- | -- |
|            | Ca(ICC2/PI489777)SNP_08303 | 3887 | G | A | 8  | 8  | -- | -- |
| CakTC31491 | Ca(ICC2/PI489777)SNP_08304 | 1085 | A | G | 6  | 3  | -- | -- |
| CakTC22388 | Ca(ICC2/PI489777)SNP_08305 | 862  | G | T | 21 | 6  | -- | -- |
| CakTC09812 | Ca(ICC2/PI489777)SNP_08306 | 812  | C | T | 4  | 4  | -- | -- |
|            | Ca(ICC2/PI489777)SNP_08307 | 814  | C | G | 4  | 4  | -- | -- |
| CakTC36187 | Ca(ICC2/PI489777)SNP_08308 | 1125 | T | C | 3  | 4  | -- | -- |
|            | Ca(ICC2/PI489777)SNP_08309 | 3710 | C | T | 11 | 7  | -- | -- |
|            | Ca(ICC2/PI489777)SNP_08310 | 3722 | G | A | 11 | 6  | -- | -- |
|            | Ca(ICC2/PI489777)SNP_08311 | 3828 | A | G | 10 | 11 | -- | -- |
|            | Ca(ICC2/PI489777)SNP_08312 | 4584 | C | T | 17 | 6  | -- | -- |
|            | Ca(ICC2/PI489777)SNP_08313 | 5278 | A | G | 9  | 7  | -- | -- |
| CakTC28265 | Ca(ICC2/PI489777)SNP_08314 | 182  | A | C | 39 | 6  | -- | -- |
|            | Ca(ICC2/PI489777)SNP_08315 | 222  | G | A | 46 | 4  | -- | -- |
|            | Ca(ICC2/PI489777)SNP_08316 | 275  | G | A | 46 | 4  | -- | -- |
|            | Ca(ICC2/PI489777)SNP_08317 | 2354 | G | A | 28 | 6  | -- | -- |
|            | Ca(ICC2/PI489777)SNP_08318 | 2491 | A | T | 22 | 5  | -- | -- |
|            | Ca(ICC2/PI489777)SNP_08319 | 2684 | T | G | 26 | 4  | -- | -- |
|            | Ca(ICC2/PI489777)SNP_08320 | 2982 | G | C | 24 | 4  | -- | -- |
|            | Ca(ICC2/PI489777)SNP_08321 | 3861 | G | A | 7  | 7  | -- | -- |
|            | Ca(ICC2/PI489777)SNP_08322 | 5565 | C | T | 14 | 3  | -- | -- |
|            | Ca(ICC2/PI489777)SNP_08323 | 5675 | T | C | 13 | 3  | -- | -- |
|            | Ca(ICC2/PI489777)SNP_08324 | 8907 | T | C | 5  | 4  | -- | -- |
| CakTC27829 | Ca(ICC2/PI489777)SNP_08325 | 1755 | G | T | 14 | 3  | -- | -- |
|            | Ca(ICC2/PI489777)SNP_08326 | 1795 | C | A | 15 | 3  | -- | -- |
|            | Ca(ICC2/PI489777)SNP_08327 | 1805 | C | G | 14 | 3  | -- | -- |
|            | Ca(ICC2/PI489777)SNP_08328 | 1843 | G | T | 14 | 3  | -- | -- |
|            | Ca(ICC2/PI489777)SNP_08329 | 1844 | T | A | 14 | 3  | -- | -- |
|            | Ca(ICC2/PI489777)SNP_08330 | 1853 | A | T | 14 | 3  | -- | -- |
|            | Ca(ICC2/PI489777)SNP_08331 | 1864 | A | T | 14 | 3  | -- | -- |
|            | Ca(ICC2/PI489777)SNP_08332 | 1937 | A | G | 15 | 3  | -- | -- |
| CakTC08873 | Ca(ICC2/PI489777)SNP_08333 | 360  | C | T | 3  | 10 | -- | -- |
| CakTC41867 | Ca(ICC2/PI489777)SNP_08334 | 865  | G | A | 9  | 8  | -- | -- |
| CakTC02071 | Ca(ICC2/PI489777)SNP_08335 | 298  | A | G | 8  | 6  | -- | -- |
| CakTC43172 | Ca(ICC2/PI489777)SNP_08336 | 142  | C | T | 23 | 7  | -- | -- |
| CakTC25790 | Ca(ICC2/PI489777)SNP_08337 | 44   | A | C | 3  | 5  | -- | -- |
|            | Ca(ICC2/PI489777)SNP_08338 | 374  | T | A | 3  | 9  | -- | -- |
| CakTC27285 | Ca(ICC2/PI489777)SNP_08339 | 1578 | C | A | 23 | 8  | -- | -- |
| CakTC32595 | Ca(ICC2/PI489777)SNP_08340 | 164  | C | T | 4  | 4  | -- | -- |
|            | Ca(ICC2/PI489777)SNP_08341 | 912  | G | T | 44 | 16 | -- | -- |
|            | Ca(ICC2/PI489777)SNP_08342 | 969  | T | C | 44 | 12 | -- | -- |
|            | Ca(ICC2/PI489777)SNP_08343 | 1078 | A | G | 49 | 17 | -- | -- |
|            | Ca(ICC2/PI489777)SNP_08344 | 1297 | A | G | 33 | 14 | -- | -- |
|            | Ca(ICC2/PI489777)SNP_08345 | 1344 | A | G | 32 | 13 | -- | -- |
|            | Ca(ICC2/PI489777)SNP_08346 | 1353 | C | G | 30 | 13 | -- | -- |
|            | Ca(ICC2/PI489777)SNP_08347 | 1495 | T | C | 16 | 9  | -- | -- |
|            | Ca(ICC2/PI489777)SNP_08348 | 1604 | C | G | 19 | 11 | -- | -- |
|            | Ca(ICC2/PI489777)SNP_08349 | 1687 | A | T | 19 | 7  | -- | -- |
| CakTC24421 | Ca(ICC2/PI489777)SNP_08350 | 433  | A | G | 11 | 21 | -- | -- |
|            | Ca(ICC2/PI489777)SNP_08351 | 463  | A | G | 13 | 20 | -- | -- |
|            | Ca(ICC2/PI489777)SNP_08352 | 818  | G | A | 5  | 6  | -- | -- |
|            | Ca(ICC2/PI489777)SNP_08353 | 859  | A | G | 7  | 6  | -- | -- |
|            | Ca(ICC2/PI489777)SNP_08354 | 895  | G | A | 6  | 6  | -- | -- |
| CakTC38440 | Ca(ICC2/PI489777)SNP_08355 | 1159 | C | T | 10 | 15 | -- | -- |
|            | Ca(ICC2/PI489777)SNP_08356 | 1182 | A | C | 7  | 15 | -- | -- |
| CakTC36296 | Ca(ICC2/PI489777)SNP_08357 | 1869 | T | G | 22 | 14 | -- | -- |

|            |                            |      |   |   |     |     |        |      |
|------------|----------------------------|------|---|---|-----|-----|--------|------|
| CakTC37864 | Ca(ICC2/PI489777)SNP_08358 | 83   | C | G | 5   | 5   | --     | --   |
|            | Ca(ICC2/PI489777)SNP_08359 | 976  | A | C | 9   | 5   | --     | --   |
|            | Ca(ICC2/PI489777)SNP_08360 | 1531 | T | C | 14  | 7   | --     | --   |
|            | Ca(ICC2/PI489777)SNP_08361 | 1563 | A | G | 14  | 7   | --     | --   |
|            | Ca(ICC2/PI489777)SNP_08362 | 1577 | C | T | 12  | 7   | --     | --   |
| CakTC29201 | Ca(ICC2/PI489777)SNP_08363 | 642  | C | T | 4   | 3   | Shoot  | --   |
|            | Ca(ICC2/PI489777)SNP_08364 | 801  | G | A | 4   | 3   | Shoot  | --   |
| CakTC33279 | Ca(ICC2/PI489777)SNP_08365 | 165  | G | T | 3   | 3   | --     | --   |
| CakTC23801 | Ca(ICC2/PI489777)SNP_08366 | 493  | T | C | 73  | 83  | --     | --   |
|            | Ca(ICC2/PI489777)SNP_08367 | 1736 | T | C | 366 | 153 | --     | --   |
|            | Ca(ICC2/PI489777)SNP_08368 | 2162 | A | C | 9   | 4   | --     | --   |
| CakTC25488 | Ca(ICC2/PI489777)SNP_08369 | 145  | G | C | 12  | 4   | --     | --   |
|            | Ca(ICC2/PI489777)SNP_08370 | 478  | G | T | 5   | 3   | --     | --   |
| CakTC12336 | Ca(ICC2/PI489777)SNP_08371 | 1578 | A | T | 3   | 3   | --     | --   |
|            | Ca(ICC2/PI489777)SNP_08372 | 2725 | G | A | 13  | 15  | --     | --   |
| CakTC28384 | Ca(ICC2/PI489777)SNP_08373 | 422  | A | G | 6   | 6   | --     | --   |
|            | Ca(ICC2/PI489777)SNP_08374 | 444  | C | T | 6   | 6   | --     | --   |
|            | Ca(ICC2/PI489777)SNP_08375 | 511  | C | T | 6   | 7   | --     | --   |
|            | Ca(ICC2/PI489777)SNP_08376 | 524  | G | C | 6   | 6   | --     | --   |
|            | Ca(ICC2/PI489777)SNP_08377 | 986  | G | T | 8   | 3   | --     | --   |
| CakTC41432 | Ca(ICC2/PI489777)SNP_08378 | 999  | T | C | 13  | 7   | --     | --   |
| CakTC08499 | Ca(ICC2/PI489777)SNP_08379 | 782  | A | G | 3   | 3   | --     | --   |
|            | Ca(ICC2/PI489777)SNP_08380 | 1121 | A | G | 3   | 4   | --     | --   |
|            | Ca(ICC2/PI489777)SNP_08381 | 1214 | C | T | 4   | 6   | --     | --   |
|            | Ca(ICC2/PI489777)SNP_08382 | 1265 | A | G | 4   | 5   | --     | --   |
| CakTC28491 | Ca(ICC2/PI489777)SNP_08383 | 115  | C | A | 13  | 12  | --     | --   |
| CakTC27914 | Ca(ICC2/PI489777)SNP_08384 | 1676 | A | G | 11  | 6   | --     | --   |
|            | Ca(ICC2/PI489777)SNP_08385 | 1694 | T | G | 14  | 5   | --     | --   |
| CakTC38599 | Ca(ICC2/PI489777)SNP_08386 | 493  | T | C | 30  | 12  | --     | --   |
| CakTC31433 | Ca(ICC2/PI489777)SNP_08387 | 3762 | A | G | 5   | 3   | --     | --   |
| CakTC25045 | Ca(ICC2/PI489777)SNP_08388 | 442  | A | G | 7   | 7   | --     | --   |
|            | Ca(ICC2/PI489777)SNP_08389 | 510  | A | G | 6   | 4   | --     | --   |
| CakTC42509 | Ca(ICC2/PI489777)SNP_08390 | 458  | G | A | 114 | 65  | --     | --   |
|            | Ca(ICC2/PI489777)SNP_08391 | 1106 | A | G | 91  | 55  | --     | --   |
| CakTC43389 | Ca(ICC2/PI489777)SNP_08392 | 377  | G | A | 15  | 5   | --     | --   |
|            | Ca(ICC2/PI489777)SNP_08393 | 539  | A | G | 12  | 4   | --     | --   |
|            | Ca(ICC2/PI489777)SNP_08394 | 728  | A | G | 23  | 3   | --     | --   |
|            | Ca(ICC2/PI489777)SNP_08395 | 758  | A | G | 21  | 3   | --     | --   |
| CakTC27398 | Ca(ICC2/PI489777)SNP_08396 | 971  | T | C | 3   | 4   | Flower | bud  |
|            | Ca(ICC2/PI489777)SNP_08397 | 4708 | A | G | 3   | 7   | Flower | bud  |
|            | Ca(ICC2/PI489777)SNP_08398 | 6253 | C | T | 10  | 5   | Flower | bud  |
|            | Ca(ICC2/PI489777)SNP_08399 | 6394 | A | G | 6   | 5   | Flower | bud  |
|            | Ca(ICC2/PI489777)SNP_08400 | 6440 | A | G | 5   | 5   | Flower | bud  |
| CakTC39128 | Ca(ICC2/PI489777)SNP_08401 | 943  | G | A | 9   | 4   | --     | --   |
|            | Ca(ICC2/PI489777)SNP_08402 | 1098 | A | G | 7   | 8   | --     | --   |
| CakTC40366 | Ca(ICC2/PI489777)SNP_08403 | 190  | G | C | 25  | 11  | --     | --   |
|            | Ca(ICC2/PI489777)SNP_08404 | 723  | A | G | 13  | 3   | --     | --   |
|            | Ca(ICC2/PI489777)SNP_08405 | 855  | T | C | 12  | 5   | --     | --   |
|            | Ca(ICC2/PI489777)SNP_08406 | 1165 | A | G | 32  | 10  | --     | --   |
|            | Ca(ICC2/PI489777)SNP_08407 | 1227 | C | A | 24  | 12  | --     | --   |
|            | Ca(ICC2/PI489777)SNP_08408 | 1658 | T | G | 18  | 12  | --     | --   |
| CakTC34625 | Ca(ICC2/PI489777)SNP_08409 | 23   | T | C | 5   | 3   | --     | --   |
|            | Ca(ICC2/PI489777)SNP_08410 | 449  | A | G | 11  | 9   | --     | --   |
|            | Ca(ICC2/PI489777)SNP_08411 | 545  | C | T | 11  | 8   | --     | --   |
|            | Ca(ICC2/PI489777)SNP_08412 | 716  | A | G | 14  | 7   | --     | --   |
|            | Ca(ICC2/PI489777)SNP_08413 | 1022 | G | A | 8   | 6   | --     | --   |
|            | Ca(ICC2/PI489777)SNP_08414 | 1049 | G | A | 8   | 5   | --     | --   |
|            | Ca(ICC2/PI489777)SNP_08415 | 1091 | A | G | 13  | 7   | --     | --   |
| CakTC37532 | Ca(ICC2/PI489777)SNP_08416 | 675  | C | T | 11  | 3   | --     | bHLH |
| CakTC40573 | Ca(ICC2/PI489777)SNP_08417 | 52   | G | T | 3   | 3   | --     | --   |
|            | Ca(ICC2/PI489777)SNP_08418 | 109  | A | G | 6   | 5   | --     | --   |
|            | Ca(ICC2/PI489777)SNP_08419 | 136  | T | G | 7   | 7   | --     | --   |
|            | Ca(ICC2/PI489777)SNP_08420 | 205  | T | A | 6   | 7   | --     | --   |
| CakTC31439 | Ca(ICC2/PI489777)SNP_08421 | 40   | T | C | 6   | 3   | --     | --   |
|            | Ca(ICC2/PI489777)SNP_08422 | 89   | A | T | 7   | 6   | --     | --   |
|            | Ca(ICC2/PI489777)SNP_08423 | 103  | C | T | 9   | 6   | --     | --   |
|            | Ca(ICC2/PI489777)SNP_08424 | 121  | A | C | 9   | 6   | --     | --   |
|            | Ca(ICC2/PI489777)SNP_08425 | 136  | T | A | 8   | 5   | --     | --   |
|            | Ca(ICC2/PI489777)SNP_08426 | 182  | C | T | 11  | 6   | --     | --   |
|            | Ca(ICC2/PI489777)SNP_08427 | 343  | T | C | 18  | 7   | --     | --   |
|            | Ca(ICC2/PI489777)SNP_08428 | 388  | T | C | 19  | 8   | --     | --   |
|            | Ca(ICC2/PI489777)SNP_08429 | 462  | C | A | 20  | 10  | --     | --   |
|            | Ca(ICC2/PI489777)SNP_08430 | 514  | G | A | 19  | 4   | --     | --   |
|            | Ca(ICC2/PI489777)SNP_08431 | 520  | C | T | 17  | 7   | --     | --   |

|            |                            |      |   |   |    |    |      |       |
|------------|----------------------------|------|---|---|----|----|------|-------|
|            | Ca(ICC2/PI489777)SNP_08432 | 526  | T | C | 18 | 7  | --   | --    |
|            | Ca(ICC2/PI489777)SNP_08433 | 746  | G | A | 12 | 7  | --   | --    |
|            | Ca(ICC2/PI489777)SNP_08434 | 754  | T | G | 8  | 7  | --   | --    |
| CakTC33733 | Ca(ICC2/PI489777)SNP_08435 | 145  | A | G | 10 | 4  | --   | --    |
|            | Ca(ICC2/PI489777)SNP_08436 | 2341 | A | G | 14 | 11 | --   | --    |
| CakTC37341 | Ca(ICC2/PI489777)SNP_08437 | 247  | G | C | 9  | 10 | --   | --    |
|            | Ca(ICC2/PI489777)SNP_08438 | 374  | C | T | 13 | 12 | --   | --    |
| CakTC24735 | Ca(ICC2/PI489777)SNP_08439 | 717  | G | A | 5  | 9  | --   | --    |
|            | Ca(ICC2/PI489777)SNP_08440 | 3069 | C | T | 3  | 4  | --   | --    |
| CakTC25732 | Ca(ICC2/PI489777)SNP_08441 | 324  | G | A | 30 | 9  | --   | --    |
|            | Ca(ICC2/PI489777)SNP_08442 | 386  | T | C | 36 | 13 | --   | --    |
| CakTC12244 | Ca(ICC2/PI489777)SNP_08443 | 535  | C | G | 25 | 9  | --   | --    |
|            | Ca(ICC2/PI489777)SNP_08444 | 809  | G | T | 34 | 18 | --   | --    |
|            | Ca(ICC2/PI489777)SNP_08445 | 812  | C | T | 35 | 17 | --   | --    |
|            | Ca(ICC2/PI489777)SNP_08446 | 860  | C | T | 35 | 17 | --   | --    |
|            | Ca(ICC2/PI489777)SNP_08447 | 914  | A | C | 33 | 15 | --   | --    |
|            | Ca(ICC2/PI489777)SNP_08448 | 1397 | T | C | 66 | 44 | --   | --    |
| CakTC08882 | Ca(ICC2/PI489777)SNP_08449 | 71   | C | T | 3  | 3  | --   | --    |
| CakTC33392 | Ca(ICC2/PI489777)SNP_08450 | 359  | T | G | 11 | 5  | --   | --    |
|            | Ca(ICC2/PI489777)SNP_08451 | 659  | C | G | 12 | 5  | --   | --    |
|            | Ca(ICC2/PI489777)SNP_08452 | 1012 | C | G | 7  | 5  | --   | --    |
|            | Ca(ICC2/PI489777)SNP_08453 | 1694 | T | C | 6  | 4  | --   | --    |
|            | Ca(ICC2/PI489777)SNP_08454 | 2042 | G | A | 4  | 10 | --   | --    |
| CakTC28563 | Ca(ICC2/PI489777)SNP_08455 | 628  | T | C | 30 | 9  | --   | --    |
|            | Ca(ICC2/PI489777)SNP_08456 | 664  | G | A | 30 | 7  | --   | --    |
|            | Ca(ICC2/PI489777)SNP_08457 | 1411 | A | C | 7  | 3  | --   | --    |
| CakTC23694 | Ca(ICC2/PI489777)SNP_08458 | 124  | G | A | 3  | 4  | --   | --    |
|            | Ca(ICC2/PI489777)SNP_08459 | 168  | C | T | 17 | 4  | --   | --    |
|            | Ca(ICC2/PI489777)SNP_08460 | 597  | G | T | 38 | 33 | --   | --    |
| CakTC27550 | Ca(ICC2/PI489777)SNP_08461 | 713  | T | A | 19 | 6  | --   | --    |
|            | Ca(ICC2/PI489777)SNP_08462 | 1197 | G | A | 26 | 16 | --   | --    |
|            | Ca(ICC2/PI489777)SNP_08463 | 1288 | G | A | 21 | 15 | --   | --    |
|            | Ca(ICC2/PI489777)SNP_08464 | 1321 | G | A | 21 | 17 | --   | --    |
|            | Ca(ICC2/PI489777)SNP_08465 | 1900 | A | G | 32 | 11 | --   | --    |
|            | Ca(ICC2/PI489777)SNP_08466 | 3210 | A | G | 16 | 14 | --   | --    |
| CakTC24937 | Ca(ICC2/PI489777)SNP_08467 | 517  | G | A | 9  | 9  | --   | --    |
| CakTC34454 | Ca(ICC2/PI489777)SNP_08468 | 483  | A | C | 20 | 4  | --   | --    |
|            | Ca(ICC2/PI489777)SNP_08469 | 624  | G | C | 15 | 3  | --   | --    |
|            | Ca(ICC2/PI489777)SNP_08470 | 702  | A | C | 14 | 3  | --   | --    |
|            | Ca(ICC2/PI489777)SNP_08471 | 780  | A | G | 9  | 3  | --   | --    |
|            | Ca(ICC2/PI489777)SNP_08472 | 933  | C | T | 13 | 10 | --   | --    |
|            | Ca(ICC2/PI489777)SNP_08473 | 963  | C | T | 10 | 9  | --   | --    |
|            | Ca(ICC2/PI489777)SNP_08474 | 1016 | A | G | 8  | 10 | --   | --    |
|            | Ca(ICC2/PI489777)SNP_08475 | 1194 | C | T | 12 | 16 | --   | --    |
|            | Ca(ICC2/PI489777)SNP_08476 | 1314 | G | A | 11 | 28 | --   | --    |
|            | Ca(ICC2/PI489777)SNP_08477 | 1435 | A | G | 14 | 32 | --   | --    |
|            | Ca(ICC2/PI489777)SNP_08478 | 1835 | T | C | 6  | 7  | --   | --    |
|            | Ca(ICC2/PI489777)SNP_08479 | 1867 | A | T | 6  | 6  | --   | --    |
| CakTC27895 | Ca(ICC2/PI489777)SNP_08480 | 1931 | T | G | 5  | 3  | Root | --    |
|            | Ca(ICC2/PI489777)SNP_08481 | 2438 | T | A | 6  | 3  | Root | --    |
| CakTC41924 | Ca(ICC2/PI489777)SNP_08482 | 509  | G | A | 4  | 3  | --   | --    |
| CakTC36567 | Ca(ICC2/PI489777)SNP_08483 | 2106 | A | C | 10 | 10 | --   | --    |
| CakTC11512 | Ca(ICC2/PI489777)SNP_08484 | 23   | C | G | 9  | 10 | --   | --    |
| CakTC26598 | Ca(ICC2/PI489777)SNP_08485 | 372  | C | T | 13 | 4  | --   | --    |
|            | Ca(ICC2/PI489777)SNP_08486 | 485  | A | G | 7  | 7  | --   | --    |
|            | Ca(ICC2/PI489777)SNP_08487 | 1147 | G | A | 10 | 4  | --   | --    |
|            | Ca(ICC2/PI489777)SNP_08488 | 1531 | G | T | 20 | 5  | --   | --    |
|            | Ca(ICC2/PI489777)SNP_08489 | 1555 | G | A | 17 | 5  | --   | --    |
| CakTC22930 | Ca(ICC2/PI489777)SNP_08490 | 497  | G | A | 4  | 15 | --   | --    |
|            | Ca(ICC2/PI489777)SNP_08491 | 868  | A | G | 4  | 31 | --   | --    |
|            | Ca(ICC2/PI489777)SNP_08492 | 1053 | G | A | 7  | 21 | --   | --    |
| CakTC31564 | Ca(ICC2/PI489777)SNP_08493 | 2563 | C | G | 3  | 4  | --   | --    |
| CakTC33204 | Ca(ICC2/PI489777)SNP_08494 | 196  | C | T | 13 | 9  | --   | --    |
|            | Ca(ICC2/PI489777)SNP_08495 | 676  | T | C | 18 | 6  | --   | --    |
|            | Ca(ICC2/PI489777)SNP_08496 | 1200 | G | C | 22 | 7  | --   | --    |
|            | Ca(ICC2/PI489777)SNP_08497 | 1486 | T | A | 15 | 18 | --   | --    |
|            | Ca(ICC2/PI489777)SNP_08498 | 1812 | A | C | 20 | 20 | --   | --    |
| CakTC18440 | Ca(ICC2/PI489777)SNP_08499 | 1058 | G | A | 11 | 12 | --   | CCAAT |
|            | Ca(ICC2/PI489777)SNP_08500 | 1099 | G | T | 9  | 11 | --   | CCAAT |
|            | Ca(ICC2/PI489777)SNP_08501 | 1120 | A | C | 7  | 10 | --   | CCAAT |
|            | Ca(ICC2/PI489777)SNP_08502 | 1157 | T | A | 7  | 8  | --   | CCAAT |
| CakTC27646 | Ca(ICC2/PI489777)SNP_08503 | 547  | G | C | 5  | 6  | --   | --    |
| CakTC43181 | Ca(ICC2/PI489777)SNP_08504 | 101  | T | G | 12 | 13 | --   | --    |
|            | Ca(ICC2/PI489777)SNP_08505 | 126  | C | T | 12 | 13 | --   | --    |

|            |                            |      |   |   |    |    |      |    |
|------------|----------------------------|------|---|---|----|----|------|----|
|            | Ca(ICC2/PI489777)SNP_08506 | 196  | T | C | 12 | 13 | --   | -- |
| CakTC30293 | Ca(ICC2/PI489777)SNP_08507 | 364  | A | G | 4  | 3  | --   | -- |
|            | Ca(ICC2/PI489777)SNP_08508 | 391  | A | G | 4  | 4  | --   | -- |
| CakTC34231 | Ca(ICC2/PI489777)SNP_08509 | 223  | G | A | 4  | 7  | Root | -- |
|            | Ca(ICC2/PI489777)SNP_08510 | 316  | A | G | 5  | 5  | Root | -- |
|            | Ca(ICC2/PI489777)SNP_08511 | 619  | C | T | 4  | 8  | Root | -- |
|            | Ca(ICC2/PI489777)SNP_08512 | 645  | C | G | 4  | 5  | Root | -- |
|            | Ca(ICC2/PI489777)SNP_08513 | 772  | C | T | 8  | 7  | Root | -- |
|            | Ca(ICC2/PI489777)SNP_08514 | 791  | A | G | 8  | 5  | Root | -- |
|            | Ca(ICC2/PI489777)SNP_08515 | 794  | A | G | 8  | 5  | Root | -- |
|            | Ca(ICC2/PI489777)SNP_08516 | 1124 | C | A | 4  | 13 | Root | -- |
|            | Ca(ICC2/PI489777)SNP_08517 | 1252 | T | A | 7  | 10 | Root | -- |
|            | Ca(ICC2/PI489777)SNP_08518 | 1300 | G | A | 8  | 9  | Root | -- |
|            | Ca(ICC2/PI489777)SNP_08519 | 1360 | G | A | 6  | 10 | Root | -- |
|            | Ca(ICC2/PI489777)SNP_08520 | 1457 | A | G | 5  | 4  | Root | -- |
|            | Ca(ICC2/PI489777)SNP_08521 | 1487 | A | G | 5  | 4  | Root | -- |
|            | Ca(ICC2/PI489777)SNP_08522 | 1517 | C | T | 5  | 3  | Root | -- |
|            | Ca(ICC2/PI489777)SNP_08523 | 1559 | G | A | 4  | 4  | Root | -- |
| CakTC24596 | Ca(ICC2/PI489777)SNP_08524 | 118  | C | A | 17 | 3  | --   | -- |
|            | Ca(ICC2/PI489777)SNP_08525 | 174  | G | T | 35 | 5  | --   | -- |
|            | Ca(ICC2/PI489777)SNP_08526 | 220  | T | C | 37 | 6  | --   | -- |
|            | Ca(ICC2/PI489777)SNP_08527 | 221  | G | T | 37 | 6  | --   | -- |
|            | Ca(ICC2/PI489777)SNP_08528 | 255  | A | C | 38 | 7  | --   | -- |
|            | Ca(ICC2/PI489777)SNP_08529 | 351  | A | T | 20 | 3  | --   | -- |
|            | Ca(ICC2/PI489777)SNP_08530 | 496  | T | C | 41 | 7  | --   | -- |
|            | Ca(ICC2/PI489777)SNP_08531 | 502  | G | A | 40 | 8  | --   | -- |
|            | Ca(ICC2/PI489777)SNP_08532 | 646  | A | G | 40 | 13 | --   | -- |
|            | Ca(ICC2/PI489777)SNP_08533 | 760  | C | T | 34 | 15 | --   | -- |
|            | Ca(ICC2/PI489777)SNP_08534 | 1453 | T | C | 36 | 18 | --   | -- |
|            | Ca(ICC2/PI489777)SNP_08535 | 1495 | A | C | 37 | 16 | --   | -- |
| CakTC11376 | Ca(ICC2/PI489777)SNP_08536 | 114  | G | T | 11 | 4  | --   | -- |
|            | Ca(ICC2/PI489777)SNP_08537 | 146  | A | G | 12 | 5  | --   | -- |
|            | Ca(ICC2/PI489777)SNP_08538 | 504  | C | T | 22 | 9  | --   | -- |
|            | Ca(ICC2/PI489777)SNP_08539 | 1053 | A | T | 22 | 8  | --   | -- |
|            | Ca(ICC2/PI489777)SNP_08540 | 1094 | C | T | 26 | 8  | --   | -- |
| CakTC30786 | Ca(ICC2/PI489777)SNP_08541 | 280  | C | T | 6  | 4  | --   | -- |
|            | Ca(ICC2/PI489777)SNP_08542 | 288  | G | A | 6  | 4  | --   | -- |
|            | Ca(ICC2/PI489777)SNP_08543 | 292  | C | T | 6  | 4  | --   | -- |
|            | Ca(ICC2/PI489777)SNP_08544 | 306  | A | G | 7  | 4  | --   | -- |
|            | Ca(ICC2/PI489777)SNP_08545 | 317  | A | G | 6  | 4  | --   | -- |
|            | Ca(ICC2/PI489777)SNP_08546 | 402  | T | C | 6  | 4  | --   | -- |
|            | Ca(ICC2/PI489777)SNP_08547 | 624  | G | A | 16 | 4  | --   | -- |
|            | Ca(ICC2/PI489777)SNP_08548 | 641  | T | C | 15 | 4  | --   | -- |
|            | Ca(ICC2/PI489777)SNP_08549 | 702  | A | T | 15 | 3  | --   | -- |
|            | Ca(ICC2/PI489777)SNP_08550 | 735  | A | C | 15 | 4  | --   | -- |
|            | Ca(ICC2/PI489777)SNP_08551 | 786  | G | A | 17 | 3  | --   | -- |
| CakTC29899 | Ca(ICC2/PI489777)SNP_08552 | 471  | A | T | 25 | 15 | --   | -- |
|            | Ca(ICC2/PI489777)SNP_08553 | 2235 | T | G | 11 | 11 | --   | -- |
|            | Ca(ICC2/PI489777)SNP_08554 | 3507 | C | T | 7  | 10 | --   | -- |
|            | Ca(ICC2/PI489777)SNP_08555 | 3550 | G | A | 5  | 9  | --   | -- |
| CakTC33873 | Ca(ICC2/PI489777)SNP_08556 | 115  | T | G | 24 | 4  | --   | -- |
|            | Ca(ICC2/PI489777)SNP_08557 | 151  | T | C | 30 | 7  | --   | -- |
|            | Ca(ICC2/PI489777)SNP_08558 | 154  | C | T | 30 | 7  | --   | -- |
|            | Ca(ICC2/PI489777)SNP_08559 | 241  | A | G | 41 | 22 | --   | -- |
|            | Ca(ICC2/PI489777)SNP_08560 | 505  | A | G | 39 | 22 | --   | -- |
|            | Ca(ICC2/PI489777)SNP_08561 | 538  | A | G | 39 | 25 | --   | -- |
|            | Ca(ICC2/PI489777)SNP_08562 | 1010 | T | G | 33 | 21 | --   | -- |
|            | Ca(ICC2/PI489777)SNP_08563 | 1426 | C | A | 35 | 20 | --   | -- |
|            | Ca(ICC2/PI489777)SNP_08564 | 1441 | C | A | 32 | 17 | --   | -- |
|            | Ca(ICC2/PI489777)SNP_08565 | 1453 | G | A | 35 | 16 | --   | -- |
|            | Ca(ICC2/PI489777)SNP_08566 | 1471 | G | A | 42 | 15 | --   | -- |
|            | Ca(ICC2/PI489777)SNP_08567 | 1525 | A | G | 41 | 10 | --   | -- |
|            | Ca(ICC2/PI489777)SNP_08568 | 1792 | A | G | 28 | 11 | --   | -- |
|            | Ca(ICC2/PI489777)SNP_08569 | 1809 | G | A | 27 | 12 | --   | -- |
|            | Ca(ICC2/PI489777)SNP_08570 | 2027 | G | C | 37 | 10 | --   | -- |
|            | Ca(ICC2/PI489777)SNP_08571 | 2137 | A | G | 31 | 8  | --   | -- |
|            | Ca(ICC2/PI489777)SNP_08572 | 2163 | A | C | 32 | 8  | --   | -- |
|            | Ca(ICC2/PI489777)SNP_08573 | 2195 | G | T | 31 | 6  | --   | -- |
| CakTC40122 | Ca(ICC2/PI489777)SNP_08574 | 779  | T | A | 26 | 3  | --   | -- |
| CakTC34162 | Ca(ICC2/PI489777)SNP_08575 | 118  | G | A | 24 | 18 | --   | -- |
|            | Ca(ICC2/PI489777)SNP_08576 | 265  | T | C | 21 | 13 | --   | -- |
|            | Ca(ICC2/PI489777)SNP_08577 | 315  | T | G | 18 | 12 | --   | -- |
| CakTC23842 | Ca(ICC2/PI489777)SNP_08578 | 460  | A | G | 4  | 4  | --   | -- |
|            | Ca(ICC2/PI489777)SNP_08579 | 1222 | T | C | 9  | 3  | --   | -- |

|            |                            |      |   |   |    |    |        |      |
|------------|----------------------------|------|---|---|----|----|--------|------|
| CakTC42178 | Ca(ICC2/PI489777)SNP_08580 | 861  | A | T | 7  | 4  | --     | --   |
| CakTC27006 | Ca(ICC2/PI489777)SNP_08581 | 1210 | C | T | 10 | 8  | Shoot  | --   |
|            | Ca(ICC2/PI489777)SNP_08582 | 1373 | G | A | 6  | 5  | Shoot  | --   |
|            | Ca(ICC2/PI489777)SNP_08583 | 1514 | C | T | 5  | 4  | Shoot  | --   |
| CakTC40237 | Ca(ICC2/PI489777)SNP_08584 | 720  | A | T | 3  | 3  | --     | --   |
|            | Ca(ICC2/PI489777)SNP_08585 | 763  | T | C | 3  | 3  | --     | --   |
| CakTC41315 | Ca(ICC2/PI489777)SNP_08586 | 115  | A | C | 17 | 3  | --     | --   |
|            | Ca(ICC2/PI489777)SNP_08587 | 301  | T | C | 28 | 18 | --     | --   |
|            | Ca(ICC2/PI489777)SNP_08588 | 474  | G | C | 28 | 12 | --     | --   |
| CakTC28498 | Ca(ICC2/PI489777)SNP_08589 | 66   | A | T | 25 | 9  | --     | --   |
|            | Ca(ICC2/PI489777)SNP_08590 | 546  | G | A | 60 | 22 | --     | --   |
|            | Ca(ICC2/PI489777)SNP_08591 | 627  | A | G | 62 | 23 | --     | --   |
| CakTC37563 | Ca(ICC2/PI489777)SNP_08592 | 161  | T | C | 10 | 6  | --     | --   |
|            | Ca(ICC2/PI489777)SNP_08593 | 177  | G | A | 14 | 9  | --     | --   |
|            | Ca(ICC2/PI489777)SNP_08594 | 632  | G | T | 28 | 17 | --     | --   |
|            | Ca(ICC2/PI489777)SNP_08595 | 1270 | G | A | 25 | 16 | --     | --   |
|            | Ca(ICC2/PI489777)SNP_08596 | 1396 | G | A | 25 | 11 | --     | --   |
| CakTC29986 | Ca(ICC2/PI489777)SNP_08597 | 3769 | G | C | 4  | 13 | --     | --   |
|            | Ca(ICC2/PI489777)SNP_08598 | 3932 | C | T | 11 | 9  | --     | --   |
| CakTC31956 | Ca(ICC2/PI489777)SNP_08599 | 1286 | A | G | 4  | 3  | --     | TPR  |
|            | Ca(ICC2/PI489777)SNP_08600 | 1297 | G | T | 4  | 3  | --     | TPR  |
| CakTC42033 | Ca(ICC2/PI489777)SNP_08601 | 467  | A | C | 3  | 9  | --     | --   |
|            | Ca(ICC2/PI489777)SNP_08602 | 2320 | A | G | 5  | 3  | --     | --   |
|            | Ca(ICC2/PI489777)SNP_08603 | 2421 | G | A | 4  | 3  | --     | --   |
| CakTC39888 | Ca(ICC2/PI489777)SNP_08604 | 378  | A | T | 3  | 4  | --     | --   |
|            | Ca(ICC2/PI489777)SNP_08605 | 597  | G | A | 15 | 5  | --     | --   |
| CakTC38091 | Ca(ICC2/PI489777)SNP_08606 | 142  | G | T | 17 | 17 | --     | --   |
|            | Ca(ICC2/PI489777)SNP_08607 | 158  | C | G | 16 | 18 | --     | --   |
|            | Ca(ICC2/PI489777)SNP_08608 | 734  | C | A | 11 | 15 | --     | --   |
| CakTC04388 | Ca(ICC2/PI489777)SNP_08609 | 146  | T | C | 8  | 6  | --     | --   |
|            | Ca(ICC2/PI489777)SNP_08610 | 148  | C | T | 8  | 6  | --     | --   |
|            | Ca(ICC2/PI489777)SNP_08611 | 174  | A | T | 8  | 6  | --     | --   |
|            | Ca(ICC2/PI489777)SNP_08612 | 265  | T | C | 4  | 5  | --     | --   |
| CakTC42489 | Ca(ICC2/PI489777)SNP_08613 | 247  | T | G | 5  | 7  | Shoot  | --   |
| CakTC35508 | Ca(ICC2/PI489777)SNP_08614 | 391  | T | G | 12 | 3  | --     | --   |
| CakTC11420 | Ca(ICC2/PI489777)SNP_08615 | 129  | C | T | 4  | 7  | --     | --   |
|            | Ca(ICC2/PI489777)SNP_08616 | 163  | C | T | 4  | 7  | --     | --   |
|            | Ca(ICC2/PI489777)SNP_08617 | 199  | C | T | 5  | 9  | --     | --   |
|            | Ca(ICC2/PI489777)SNP_08618 | 261  | G | T | 5  | 9  | --     | --   |
|            | Ca(ICC2/PI489777)SNP_08619 | 293  | A | G | 5  | 8  | --     | --   |
| CakTC30668 | Ca(ICC2/PI489777)SNP_08620 | 423  | A | G | 5  | 3  | --     | --   |
|            | Ca(ICC2/PI489777)SNP_08621 | 762  | C | T | 7  | 10 | --     | --   |
|            | Ca(ICC2/PI489777)SNP_08622 | 1128 | A | C | 4  | 4  | --     | --   |
|            | Ca(ICC2/PI489777)SNP_08623 | 1179 | A | G | 4  | 4  | --     | --   |
|            | Ca(ICC2/PI489777)SNP_08624 | 1714 | C | A | 9  | 7  | --     | --   |
|            | Ca(ICC2/PI489777)SNP_08625 | 1778 | T | C | 13 | 7  | --     | --   |
|            | Ca(ICC2/PI489777)SNP_08626 | 2107 | C | T | 7  | 3  | --     | --   |
|            | Ca(ICC2/PI489777)SNP_08627 | 2225 | G | A | 9  | 6  | --     | --   |
|            | Ca(ICC2/PI489777)SNP_08628 | 2350 | G | A | 9  | 3  | --     | --   |
|            | Ca(ICC2/PI489777)SNP_08629 | 2401 | T | A | 8  | 6  | --     | --   |
|            | Ca(ICC2/PI489777)SNP_08630 | 2472 | C | G | 7  | 6  | --     | --   |
|            | Ca(ICC2/PI489777)SNP_08631 | 2482 | T | C | 9  | 6  | --     | --   |
|            | Ca(ICC2/PI489777)SNP_08632 | 2485 | T | C | 8  | 6  | --     | --   |
|            | Ca(ICC2/PI489777)SNP_08633 | 2494 | T | G | 9  | 8  | --     | --   |
|            | Ca(ICC2/PI489777)SNP_08634 | 2611 | G | A | 5  | 7  | --     | --   |
|            | Ca(ICC2/PI489777)SNP_08635 | 2620 | C | A | 5  | 8  | --     | --   |
|            | Ca(ICC2/PI489777)SNP_08636 | 2652 | C | A | 4  | 8  | --     | --   |
| CakTC43112 | Ca(ICC2/PI489777)SNP_08637 | 236  | T | C | 6  | 4  | Mature | Leaf |
|            | Ca(ICC2/PI489777)SNP_08638 | 560  | T | C | 14 | 5  | Mature | Leaf |
|            | Ca(ICC2/PI489777)SNP_08639 | 983  | T | C | 27 | 3  | Mature | Leaf |
|            | Ca(ICC2/PI489777)SNP_08640 | 1004 | A | T | 25 | 5  | Mature | Leaf |
|            | Ca(ICC2/PI489777)SNP_08641 | 1061 | A | G | 32 | 5  | Mature | Leaf |
|            | Ca(ICC2/PI489777)SNP_08642 | 1457 | T | C | 10 | 8  | Mature | Leaf |
| CakTC07583 | Ca(ICC2/PI489777)SNP_08643 | 614  | C | T | 6  | 3  | --     | --   |
|            | Ca(ICC2/PI489777)SNP_08644 | 617  | G | A | 6  | 3  | --     | --   |
| CakTC39806 | Ca(ICC2/PI489777)SNP_08645 | 73   | T | C | 10 | 4  | --     | --   |
|            | Ca(ICC2/PI489777)SNP_08646 | 218  | G | A | 19 | 7  | --     | --   |
|            | Ca(ICC2/PI489777)SNP_08647 | 513  | G | A | 27 | 16 | --     | --   |
|            | Ca(ICC2/PI489777)SNP_08648 | 668  | G | A | 18 | 13 | --     | --   |
|            | Ca(ICC2/PI489777)SNP_08649 | 1172 | A | C | 20 | 8  | --     | --   |
|            | Ca(ICC2/PI489777)SNP_08650 | 1226 | A | G | 19 | 9  | --     | --   |
|            | Ca(ICC2/PI489777)SNP_08651 | 1242 | C | A | 19 | 6  | --     | --   |
|            | Ca(ICC2/PI489777)SNP_08652 | 1249 | G | A | 20 | 6  | --     | --   |
| CakTC32374 | Ca(ICC2/PI489777)SNP_08653 | 452  | A | G | 13 | 4  | --     | --   |

|            |                            |      |   |   |     |    |        |              |
|------------|----------------------------|------|---|---|-----|----|--------|--------------|
|            | Ca(ICC2/PI489777)SNP_08654 | 755  | A | G | 7   | 4  | --     | --           |
|            | Ca(ICC2/PI489777)SNP_08655 | 923  | A | G | 9   | 6  | --     | --           |
|            | Ca(ICC2/PI489777)SNP_08656 | 995  | A | C | 6   | 11 | --     | --           |
| CakTC28006 | Ca(ICC2/PI489777)SNP_08657 | 1685 | T | A | 19  | 9  | --     | --           |
|            | Ca(ICC2/PI489777)SNP_08658 | 2516 | A | T | 13  | 13 | --     | --           |
|            | Ca(ICC2/PI489777)SNP_08659 | 2645 | C | A | 15  | 19 | --     | --           |
|            | Ca(ICC2/PI489777)SNP_08660 | 2678 | G | A | 15  | 20 | --     | --           |
|            | Ca(ICC2/PI489777)SNP_08661 | 2910 | T | G | 15  | 13 | --     | --           |
| CakTC40738 | Ca(ICC2/PI489777)SNP_08662 | 340  | G | C | 26  | 11 | --     | GRAS         |
|            | Ca(ICC2/PI489777)SNP_08663 | 452  | T | C | 26  | 12 | --     | GRAS         |
|            | Ca(ICC2/PI489777)SNP_08664 | 506  | C | G | 29  | 12 | --     | GRAS         |
|            | Ca(ICC2/PI489777)SNP_08665 | 872  | A | G | 46  | 7  | --     | GRAS         |
|            | Ca(ICC2/PI489777)SNP_08666 | 1085 | A | G | 43  | 9  | --     | GRAS         |
|            | Ca(ICC2/PI489777)SNP_08667 | 1432 | G | T | 37  | 3  | --     | GRAS         |
|            | Ca(ICC2/PI489777)SNP_08668 | 1523 | G | A | 34  | 3  | --     | GRAS         |
|            | Ca(ICC2/PI489777)SNP_08669 | 1556 | A | C | 27  | 3  | --     | GRAS         |
|            | Ca(ICC2/PI489777)SNP_08670 | 2406 | G | A | 3   | 3  | --     | GRAS         |
| CakTC16249 | Ca(ICC2/PI489777)SNP_08671 | 626  | C | G | 3   | 3  | --     | --           |
|            | Ca(ICC2/PI489777)SNP_08672 | 652  | T | C | 3   | 4  | --     | --           |
| CakTC22599 | Ca(ICC2/PI489777)SNP_08673 | 555  | A | T | 6   | 3  | Flower | bud          |
| CakTC30011 | Ca(ICC2/PI489777)SNP_08674 | 4447 | C | T | 21  | 16 | --     | DBP          |
|            | Ca(ICC2/PI489777)SNP_08675 | 4735 | A | G | 6   | 13 | --     | DBP          |
|            | Ca(ICC2/PI489777)SNP_08676 | 4870 | T | A | 6   | 10 | --     | DBP          |
|            | Ca(ICC2/PI489777)SNP_08677 | 4872 | A | G | 6   | 9  | --     | DBP          |
| CakTC39881 | Ca(ICC2/PI489777)SNP_08678 | 550  | A | T | 4   | 5  | --     | --           |
|            | Ca(ICC2/PI489777)SNP_08679 | 619  | T | C | 8   | 6  | --     | --           |
|            | Ca(ICC2/PI489777)SNP_08680 | 683  | T | C | 8   | 4  | --     | --           |
|            | Ca(ICC2/PI489777)SNP_08681 | 1181 | A | G | 7   | 4  | --     | --           |
| CakTC39137 | Ca(ICC2/PI489777)SNP_08682 | 113  | C | T | 4   | 3  | Shoot  | --           |
|            | Ca(ICC2/PI489777)SNP_08683 | 407  | A | G | 5   | 6  | Shoot  | --           |
|            | Ca(ICC2/PI489777)SNP_08684 | 447  | T | C | 4   | 6  | Shoot  | --           |
|            | Ca(ICC2/PI489777)SNP_08685 | 1219 | A | G | 4   | 4  | Shoot  | --           |
| CakTC27193 | Ca(ICC2/PI489777)SNP_08686 | 341  | C | T | 10  | 7  | --     | --           |
|            | Ca(ICC2/PI489777)SNP_08687 | 716  | G | A | 11  | 7  | --     | --           |
|            | Ca(ICC2/PI489777)SNP_08688 | 737  | T | C | 12  | 8  | --     | --           |
|            | Ca(ICC2/PI489777)SNP_08689 | 942  | C | T | 12  | 4  | --     | --           |
| CakTC38070 | Ca(ICC2/PI489777)SNP_08690 | 1202 | A | G | 3   | 5  | --     | --           |
| CakTC36037 | Ca(ICC2/PI489777)SNP_08691 | 363  | G | A | 3   | 3  | --     | --           |
| CakTC31450 | Ca(ICC2/PI489777)SNP_08692 | 769  | T | C | 3   | 5  | --     | --           |
| CakTC42905 | Ca(ICC2/PI489777)SNP_08693 | 381  | T | G | 25  | 14 | --     | --           |
|            | Ca(ICC2/PI489777)SNP_08694 | 420  | G | A | 19  | 13 | --     | --           |
| CakTC14736 | Ca(ICC2/PI489777)SNP_08695 | 1371 | A | T | 17  | 16 | --     | --           |
|            | Ca(ICC2/PI489777)SNP_08696 | 1752 | A | C | 19  | 28 | --     | --           |
|            | Ca(ICC2/PI489777)SNP_08697 | 2738 | C | T | 92  | 58 | --     | --           |
|            | Ca(ICC2/PI489777)SNP_08698 | 3136 | T | C | 9   | 8  | --     | --           |
|            | Ca(ICC2/PI489777)SNP_08699 | 3213 | C | A | 10  | 6  | --     | --           |
| CakTC27311 | Ca(ICC2/PI489777)SNP_08700 | 734  | G | A | 4   | 39 | --     | --           |
|            | Ca(ICC2/PI489777)SNP_08701 | 1455 | A | G | 12  | 3  | --     | --           |
|            | Ca(ICC2/PI489777)SNP_08702 | 2958 | A | C | 5   | 6  | --     | --           |
|            | Ca(ICC2/PI489777)SNP_08703 | 3403 | A | G | 13  | 3  | --     | --           |
|            | Ca(ICC2/PI489777)SNP_08704 | 4191 | T | C | 7   | 5  | --     | --           |
| CakTC34257 | Ca(ICC2/PI489777)SNP_08705 | 194  | G | A | 5   | 7  | --     | --           |
| CakTC42339 | Ca(ICC2/PI489777)SNP_08706 | 733  | G | A | 34  | 10 | --     | --           |
|            | Ca(ICC2/PI489777)SNP_08707 | 1040 | C | A | 6   | 5  | --     | --           |
| CakTC34007 | Ca(ICC2/PI489777)SNP_08708 | 81   | A | G | 10  | 19 | --     | --           |
| CakTC25212 | Ca(ICC2/PI489777)SNP_08709 | 596  | T | C | 10  | 8  | --     | --           |
|            | Ca(ICC2/PI489777)SNP_08710 | 1649 | C | T | 22  | 8  | --     | --           |
|            | Ca(ICC2/PI489777)SNP_08711 | 1817 | C | T | 24  | 8  | --     | --           |
|            | Ca(ICC2/PI489777)SNP_08712 | 2504 | A | C | 21  | 8  | --     | --           |
| CakTC23008 | Ca(ICC2/PI489777)SNP_08713 | 347  | A | G | 59  | 54 | --     | --           |
| CakTC39622 | Ca(ICC2/PI489777)SNP_08714 | 710  | A | G | 11  | 18 | --     | bZIP         |
| CakTC34053 | Ca(ICC2/PI489777)SNP_08715 | 357  | A | G | 16  | 4  | --     | Sigma70-like |
|            | Ca(ICC2/PI489777)SNP_08716 | 1254 | T | C | 15  | 4  | --     | Sigma70-like |
|            | Ca(ICC2/PI489777)SNP_08717 | 1377 | C | T | 22  | 4  | --     | Sigma70-like |
|            | Ca(ICC2/PI489777)SNP_08718 | 1897 | T | A | 18  | 6  | --     | Sigma70-like |
| CakTC25690 | Ca(ICC2/PI489777)SNP_08719 | 604  | T | C | 35  | 48 | --     | --           |
| CakTC37144 | Ca(ICC2/PI489777)SNP_08720 | 378  | C | A | 37  | 26 | --     | --           |
|            | Ca(ICC2/PI489777)SNP_08721 | 991  | C | T | 104 | 42 | --     | --           |
| CakTC27051 | Ca(ICC2/PI489777)SNP_08722 | 212  | C | A | 21  | 18 | --     | TPR          |
|            | Ca(ICC2/PI489777)SNP_08723 | 262  | C | T | 25  | 21 | --     | TPR          |
|            | Ca(ICC2/PI489777)SNP_08724 | 1416 | T | C | 21  | 9  | --     | TPR          |
|            | Ca(ICC2/PI489777)SNP_08725 | 1863 | G | A | 23  | 22 | --     | TPR          |
|            | Ca(ICC2/PI489777)SNP_08726 | 2412 | C | T | 27  | 24 | --     | TPR          |
|            | Ca(ICC2/PI489777)SNP_08727 | 2667 | C | T | 42  | 17 | --     | TPR          |

|            |                            |      |   |   |     |    |           |     |
|------------|----------------------------|------|---|---|-----|----|-----------|-----|
|            | Ca(ICC2/PI489777)SNP_08728 | 2790 | C | T | 35  | 19 | --        | TPR |
|            | Ca(ICC2/PI489777)SNP_08729 | 3024 | T | G | 28  | 18 | --        | TPR |
| CakTC05727 | Ca(ICC2/PI489777)SNP_08730 | 235  | C | T | 4   | 4  | --        | --  |
| CakTC16639 | Ca(ICC2/PI489777)SNP_08731 | 777  | A | G | 27  | 9  | --        | --  |
|            | Ca(ICC2/PI489777)SNP_08732 | 2753 | A | T | 15  | 5  | --        | --  |
| CakTC12506 | Ca(ICC2/PI489777)SNP_08733 | 1070 | T | C | 5   | 8  | Young_pod | --  |
| CakTC28215 | Ca(ICC2/PI489777)SNP_08734 | 1281 | G | A | 12  | 3  | --        | --  |
|            | Ca(ICC2/PI489777)SNP_08735 | 1714 | T | C | 6   | 4  | --        | --  |
| CakTC09279 | Ca(ICC2/PI489777)SNP_08736 | 991  | T | A | 6   | 4  | --        | --  |
| CakTC30533 | Ca(ICC2/PI489777)SNP_08737 | 99   | G | T | 3   | 5  | --        | --  |
|            | Ca(ICC2/PI489777)SNP_08738 | 271  | A | G | 4   | 5  | --        | --  |
|            | Ca(ICC2/PI489777)SNP_08739 | 1291 | C | T | 5   | 6  | --        | --  |
|            | Ca(ICC2/PI489777)SNP_08740 | 1408 | T | C | 5   | 5  | --        | --  |
| CakTC38270 | Ca(ICC2/PI489777)SNP_08741 | 400  | C | A | 9   | 19 | Root      | --  |
|            | Ca(ICC2/PI489777)SNP_08742 | 463  | G | A | 11  | 21 | Root      | --  |
|            | Ca(ICC2/PI489777)SNP_08743 | 701  | G | A | 19  | 14 | Root      | --  |
| CakTC26424 | Ca(ICC2/PI489777)SNP_08744 | 98   | G | A | 19  | 14 | --        | --  |
|            | Ca(ICC2/PI489777)SNP_08745 | 119  | C | T | 20  | 14 | --        | --  |
|            | Ca(ICC2/PI489777)SNP_08746 | 137  | T | A | 20  | 14 | --        | --  |
|            | Ca(ICC2/PI489777)SNP_08747 | 1225 | A | G | 7   | 15 | --        | --  |
| CakTC40621 | Ca(ICC2/PI489777)SNP_08748 | 143  | A | T | 81  | 8  | --        | --  |
|            | Ca(ICC2/PI489777)SNP_08749 | 476  | G | A | 169 | 45 | --        | --  |
|            | Ca(ICC2/PI489777)SNP_08750 | 532  | C | T | 181 | 58 | --        | --  |
|            | Ca(ICC2/PI489777)SNP_08751 | 1657 | C | T | 148 | 52 | --        | --  |
|            | Ca(ICC2/PI489777)SNP_08752 | 1691 | G | T | 146 | 43 | --        | --  |
|            | Ca(ICC2/PI489777)SNP_08753 | 1697 | C | A | 141 | 39 | --        | --  |
|            | Ca(ICC2/PI489777)SNP_08754 | 1787 | A | G | 118 | 37 | --        | --  |
| CakTC40841 | Ca(ICC2/PI489777)SNP_08755 | 67   | G | A | 6   | 4  | --        | --  |
|            | Ca(ICC2/PI489777)SNP_08756 | 71   | C | G | 6   | 4  | --        | --  |
|            | Ca(ICC2/PI489777)SNP_08757 | 702  | A | G | 17  | 6  | --        | --  |
|            | Ca(ICC2/PI489777)SNP_08758 | 1284 | T | C | 17  | 12 | --        | --  |
|            | Ca(ICC2/PI489777)SNP_08759 | 1321 | C | G | 20  | 12 | --        | --  |
|            | Ca(ICC2/PI489777)SNP_08760 | 1338 | C | T | 18  | 15 | --        | --  |
|            | Ca(ICC2/PI489777)SNP_08761 | 1542 | T | C | 19  | 12 | --        | --  |
|            | Ca(ICC2/PI489777)SNP_08762 | 1693 | G | C | 11  | 6  | --        | --  |
| CakTC25391 | Ca(ICC2/PI489777)SNP_08763 | 323  | A | G | 16  | 17 | --        | --  |
|            | Ca(ICC2/PI489777)SNP_08764 | 452  | T | C | 28  | 19 | --        | --  |
|            | Ca(ICC2/PI489777)SNP_08765 | 821  | T | C | 26  | 14 | --        | --  |
| CakTC36565 | Ca(ICC2/PI489777)SNP_08766 | 838  | A | G | 10  | 8  | --        | --  |
|            | Ca(ICC2/PI489777)SNP_08767 | 1429 | A | G | 5   | 3  | --        | --  |
|            | Ca(ICC2/PI489777)SNP_08768 | 1523 | C | T | 3   | 4  | --        | --  |
|            | Ca(ICC2/PI489777)SNP_08769 | 1879 | G | A | 8   | 4  | --        | --  |
|            | Ca(ICC2/PI489777)SNP_08770 | 2330 | A | C | 11  | 10 | --        | --  |
|            | Ca(ICC2/PI489777)SNP_08771 | 2418 | C | T | 10  | 9  | --        | --  |
| CakTC07464 | Ca(ICC2/PI489777)SNP_08772 | 450  | T | C | 4   | 12 | --        | --  |
|            | Ca(ICC2/PI489777)SNP_08773 | 460  | C | T | 4   | 12 | --        | --  |
|            | Ca(ICC2/PI489777)SNP_08774 | 479  | T | C | 5   | 11 | --        | --  |
|            | Ca(ICC2/PI489777)SNP_08775 | 842  | G | A | 7   | 3  | --        | --  |
|            | Ca(ICC2/PI489777)SNP_08776 | 1169 | A | G | 7   | 8  | --        | --  |
|            | Ca(ICC2/PI489777)SNP_08777 | 1724 | T | G | 3   | 7  | --        | --  |
|            | Ca(ICC2/PI489777)SNP_08778 | 1739 | G | A | 3   | 7  | --        | --  |
|            | Ca(ICC2/PI489777)SNP_08779 | 2027 | T | C | 4   | 3  | --        | --  |
| CakTC34354 | Ca(ICC2/PI489777)SNP_08780 | 2232 | T | C | 7   | 4  | --        | PHD |
|            | Ca(ICC2/PI489777)SNP_08781 | 5357 | T | C | 13  | 6  | --        | PHD |
|            | Ca(ICC2/PI489777)SNP_08782 | 5504 | C | T | 11  | 4  | --        | PHD |
|            | Ca(ICC2/PI489777)SNP_08783 | 7865 | G | A | 3   | 3  | --        | PHD |
| CakTC30228 | Ca(ICC2/PI489777)SNP_08784 | 228  | A | G | 6   | 7  | --        | --  |
|            | Ca(ICC2/PI489777)SNP_08785 | 713  | T | G | 4   | 8  | --        | --  |
| CakTC35635 | Ca(ICC2/PI489777)SNP_08786 | 1364 | A | G | 13  | 14 | --        | --  |
|            | Ca(ICC2/PI489777)SNP_08787 | 2041 | C | T | 8   | 4  | --        | --  |
|            | Ca(ICC2/PI489777)SNP_08788 | 2902 | T | C | 13  | 7  | --        | --  |
|            | Ca(ICC2/PI489777)SNP_08789 | 3010 | A | G | 11  | 4  | --        | --  |
| CakTC41243 | Ca(ICC2/PI489777)SNP_08790 | 2184 | G | T | 35  | 34 | --        | --  |
|            | Ca(ICC2/PI489777)SNP_08791 | 2185 | A | C | 33  | 34 | --        | --  |
| CakTC28314 | Ca(ICC2/PI489777)SNP_08792 | 2415 | A | G | 12  | 3  | --        | --  |
|            | Ca(ICC2/PI489777)SNP_08793 | 2460 | A | G | 17  | 3  | --        | --  |
|            | Ca(ICC2/PI489777)SNP_08794 | 2750 | G | A | 20  | 5  | --        | --  |
|            | Ca(ICC2/PI489777)SNP_08795 | 3094 | G | A | 18  | 3  | --        | --  |
| CakTC34546 | Ca(ICC2/PI489777)SNP_08796 | 142  | A | G | 7   | 7  | --        | --  |
|            | Ca(ICC2/PI489777)SNP_08797 | 1389 | A | G | 8   | 4  | --        | --  |
|            | Ca(ICC2/PI489777)SNP_08798 | 1404 | C | A | 6   | 3  | --        | --  |
|            | Ca(ICC2/PI489777)SNP_08799 | 1455 | G | A | 6   | 5  | --        | --  |
|            | Ca(ICC2/PI489777)SNP_08800 | 1920 | C | A | 10  | 6  | --        | --  |
|            | Ca(ICC2/PI489777)SNP_08801 | 1962 | A | C | 9   | 5  | --        | --  |

|            |                            |      |   |   |    |    |    |    |
|------------|----------------------------|------|---|---|----|----|----|----|
|            | Ca(ICC2/PI489777)SNP_08802 | 1995 | A | C | 7  | 4  | -- | -- |
|            | Ca(ICC2/PI489777)SNP_08803 | 2062 | C | A | 5  | 4  | -- | -- |
|            | Ca(ICC2/PI489777)SNP_08804 | 2066 | G | A | 5  | 4  | -- | -- |
| CakTC22844 | Ca(ICC2/PI489777)SNP_08805 | 911  | T | A | 13 | 9  | -- | -- |
| CakTC42660 | Ca(ICC2/PI489777)SNP_08806 | 1390 | C | T | 5  | 4  | -- | -- |
| CakTC07690 | Ca(ICC2/PI489777)SNP_08807 | 1307 | T | C | 6  | 3  | -- | -- |
| CakTC28031 | Ca(ICC2/PI489777)SNP_08808 | 518  | C | T | 9  | 3  | -- | -- |
|            | Ca(ICC2/PI489777)SNP_08809 | 520  | A | G | 11 | 3  | -- | -- |
|            | Ca(ICC2/PI489777)SNP_08810 | 534  | T | C | 12 | 3  | -- | -- |
|            | Ca(ICC2/PI489777)SNP_08811 | 1013 | A | G | 19 | 6  | -- | -- |
|            | Ca(ICC2/PI489777)SNP_08812 | 1346 | G | C | 13 | 6  | -- | -- |
| CakTC38941 | Ca(ICC2/PI489777)SNP_08813 | 42   | C | A | 4  | 4  | -- | -- |
|            | Ca(ICC2/PI489777)SNP_08814 | 158  | A | G | 6  | 5  | -- | -- |
|            | Ca(ICC2/PI489777)SNP_08815 | 350  | C | A | 9  | 7  | -- | -- |
|            | Ca(ICC2/PI489777)SNP_08816 | 614  | A | G | 15 | 12 | -- | -- |
|            | Ca(ICC2/PI489777)SNP_08817 | 794  | C | T | 17 | 12 | -- | -- |
|            | Ca(ICC2/PI489777)SNP_08818 | 839  | A | G | 22 | 10 | -- | -- |
|            | Ca(ICC2/PI489777)SNP_08819 | 905  | G | A | 14 | 14 | -- | -- |
|            | Ca(ICC2/PI489777)SNP_08820 | 1352 | A | G | 16 | 14 | -- | -- |
|            | Ca(ICC2/PI489777)SNP_08821 | 1421 | T | C | 17 | 11 | -- | -- |
|            | Ca(ICC2/PI489777)SNP_08822 | 1464 | A | G | 13 | 7  | -- | -- |
| CakTC40749 | Ca(ICC2/PI489777)SNP_08823 | 423  | T | C | 12 | 4  | -- | -- |
|            | Ca(ICC2/PI489777)SNP_08824 | 615  | T | A | 9  | 6  | -- | -- |
|            | Ca(ICC2/PI489777)SNP_08825 | 1314 | C | T | 25 | 9  | -- | -- |
|            | Ca(ICC2/PI489777)SNP_08826 | 1738 | G | A | 12 | 5  | -- | -- |
|            | Ca(ICC2/PI489777)SNP_08827 | 1820 | C | T | 12 | 3  | -- | -- |
| CakTC28678 | Ca(ICC2/PI489777)SNP_08828 | 145  | A | T | 11 | 3  | -- | -- |
|            | Ca(ICC2/PI489777)SNP_08829 | 305  | G | A | 12 | 8  | -- | -- |
|            | Ca(ICC2/PI489777)SNP_08830 | 315  | C | T | 9  | 7  | -- | -- |
|            | Ca(ICC2/PI489777)SNP_08831 | 575  | G | T | 9  | 12 | -- | -- |
|            | Ca(ICC2/PI489777)SNP_08832 | 728  | A | G | 9  | 16 | -- | -- |
|            | Ca(ICC2/PI489777)SNP_08833 | 761  | A | G | 8  | 15 | -- | -- |
| CakTC38611 | Ca(ICC2/PI489777)SNP_08834 | 260  | A | T | 16 | 3  | -- | -- |
|            | Ca(ICC2/PI489777)SNP_08835 | 266  | G | A | 13 | 3  | -- | -- |
|            | Ca(ICC2/PI489777)SNP_08836 | 272  | C | G | 16 | 3  | -- | -- |
|            | Ca(ICC2/PI489777)SNP_08837 | 284  | C | T | 16 | 3  | -- | -- |
|            | Ca(ICC2/PI489777)SNP_08838 | 292  | A | G | 15 | 3  | -- | -- |
|            | Ca(ICC2/PI489777)SNP_08839 | 662  | T | C | 17 | 5  | -- | -- |
| CakTC41927 | Ca(ICC2/PI489777)SNP_08840 | 44   | A | T | 4  | 7  | -- | -- |
|            | Ca(ICC2/PI489777)SNP_08841 | 344  | C | T | 8  | 10 | -- | -- |
|            | Ca(ICC2/PI489777)SNP_08842 | 401  | C | T | 9  | 9  | -- | -- |
|            | Ca(ICC2/PI489777)SNP_08843 | 502  | A | G | 6  | 4  | -- | -- |
| CakTC36906 | Ca(ICC2/PI489777)SNP_08844 | 378  | C | T | 7  | 6  | -- | -- |
|            | Ca(ICC2/PI489777)SNP_08845 | 379  | A | G | 7  | 6  | -- | -- |
|            | Ca(ICC2/PI489777)SNP_08846 | 428  | C | T | 12 | 10 | -- | -- |
|            | Ca(ICC2/PI489777)SNP_08847 | 476  | A | G | 13 | 12 | -- | -- |
|            | Ca(ICC2/PI489777)SNP_08848 | 783  | G | A | 24 | 10 | -- | -- |
|            | Ca(ICC2/PI489777)SNP_08849 | 1188 | A | G | 23 | 12 | -- | -- |
|            | Ca(ICC2/PI489777)SNP_08850 | 1503 | A | G | 26 | 8  | -- | -- |
|            | Ca(ICC2/PI489777)SNP_08851 | 1686 | A | G | 23 | 17 | -- | -- |
|            | Ca(ICC2/PI489777)SNP_08852 | 1829 | G | T | 39 | 16 | -- | -- |
| CakTC24168 | Ca(ICC2/PI489777)SNP_08853 | 572  | A | G | 3  | 4  | -- | -- |
| CakTC38773 | Ca(ICC2/PI489777)SNP_08854 | 212  | A | G | 4  | 3  | -- | -- |
|            | Ca(ICC2/PI489777)SNP_08855 | 502  | A | G | 7  | 4  | -- | -- |
|            | Ca(ICC2/PI489777)SNP_08856 | 766  | C | A | 7  | 5  | -- | -- |
|            | Ca(ICC2/PI489777)SNP_08857 | 801  | C | T | 6  | 7  | -- | -- |
|            | Ca(ICC2/PI489777)SNP_08858 | 805  | C | T | 6  | 7  | -- | -- |
|            | Ca(ICC2/PI489777)SNP_08859 | 821  | T | C | 6  | 6  | -- | -- |
|            | Ca(ICC2/PI489777)SNP_08860 | 986  | T | C | 4  | 4  | -- | -- |
|            | Ca(ICC2/PI489777)SNP_08861 | 1012 | A | G | 3  | 6  | -- | -- |
|            | Ca(ICC2/PI489777)SNP_08862 | 1053 | A | C | 4  | 4  | -- | -- |
| CakTC26613 | Ca(ICC2/PI489777)SNP_08863 | 549  | G | T | 14 | 20 | -- | -- |
|            | Ca(ICC2/PI489777)SNP_08864 | 552  | C | T | 12 | 20 | -- | -- |
|            | Ca(ICC2/PI489777)SNP_08865 | 745  | A | T | 23 | 27 | -- | -- |
|            | Ca(ICC2/PI489777)SNP_08866 | 814  | A | C | 24 | 27 | -- | -- |
|            | Ca(ICC2/PI489777)SNP_08867 | 846  | G | A | 26 | 31 | -- | -- |
|            | Ca(ICC2/PI489777)SNP_08868 | 1125 | G | A | 36 | 30 | -- | -- |
|            | Ca(ICC2/PI489777)SNP_08869 | 1307 | T | A | 35 | 28 | -- | -- |
|            | Ca(ICC2/PI489777)SNP_08870 | 1472 | C | T | 22 | 21 | -- | -- |
|            | Ca(ICC2/PI489777)SNP_08871 | 1565 | C | T | 18 | 18 | -- | -- |
|            | Ca(ICC2/PI489777)SNP_08872 | 1586 | T | A | 22 | 13 | -- | -- |
|            | Ca(ICC2/PI489777)SNP_08873 | 1628 | C | T | 17 | 17 | -- | -- |
|            | Ca(ICC2/PI489777)SNP_08874 | 1643 | C | T | 26 | 18 | -- | -- |
|            | Ca(ICC2/PI489777)SNP_08875 | 2155 | A | G | 24 | 13 | -- | -- |



|            |                            |      |   |   |    |    |    |      |
|------------|----------------------------|------|---|---|----|----|----|------|
|            | Ca(ICC2/PI489777)SNP_08876 | 2195 | T | A | 6  | 6  | -- | --   |
|            | Ca(ICC2/PI489777)SNP_08877 | 2205 | A | T | 9  | 6  | -- | --   |
| CakTC34416 | Ca(ICC2/PI489777)SNP_08878 | 992  | A | G | 3  | 6  | -- | --   |
|            | Ca(ICC2/PI489777)SNP_08879 | 1153 | A | C | 5  | 6  | -- | --   |
|            | Ca(ICC2/PI489777)SNP_08880 | 1745 | G | A | 7  | 6  | -- | --   |
|            | Ca(ICC2/PI489777)SNP_08881 | 1748 | A | G | 7  | 6  | -- | --   |
| CakTC41068 | Ca(ICC2/PI489777)SNP_08882 | 189  | C | T | 7  | 6  | -- | --   |
|            | Ca(ICC2/PI489777)SNP_08883 | 192  | G | C | 7  | 7  | -- | --   |
| CakTC42456 | Ca(ICC2/PI489777)SNP_08884 | 606  | G | C | 63 | 7  | -- | --   |
|            | Ca(ICC2/PI489777)SNP_08885 | 632  | C | T | 66 | 5  | -- | --   |
|            | Ca(ICC2/PI489777)SNP_08886 | 866  | A | G | 61 | 7  | -- | --   |
|            | Ca(ICC2/PI489777)SNP_08887 | 1250 | T | C | 37 | 5  | -- | --   |
|            | Ca(ICC2/PI489777)SNP_08888 | 1289 | C | T | 42 | 7  | -- | --   |
| CakTC28366 | Ca(ICC2/PI489777)SNP_08889 | 1038 | C | T | 6  | 5  | -- | --   |
| CakTC10386 | Ca(ICC2/PI489777)SNP_08890 | 742  | G | A | 7  | 3  | -- | --   |
| CakTC40418 | Ca(ICC2/PI489777)SNP_08891 | 338  | C | T | 4  | 6  | -- | --   |
|            | Ca(ICC2/PI489777)SNP_08892 | 411  | A | G | 6  | 7  | -- | --   |
|            | Ca(ICC2/PI489777)SNP_08893 | 768  | C | T | 6  | 3  | -- | --   |
| CakTC29680 | Ca(ICC2/PI489777)SNP_08894 | 291  | G | A | 34 | 34 | -- | --   |
|            | Ca(ICC2/PI489777)SNP_08895 | 1200 | G | A | 32 | 28 | -- | --   |
|            | Ca(ICC2/PI489777)SNP_08896 | 1461 | G | T | 26 | 34 | -- | --   |
|            | Ca(ICC2/PI489777)SNP_08897 | 1581 | G | A | 24 | 27 | -- | --   |
|            | Ca(ICC2/PI489777)SNP_08898 | 1722 | G | T | 17 | 19 | -- | --   |
| CakTC21047 | Ca(ICC2/PI489777)SNP_08899 | 1560 | T | C | 8  | 6  | -- | --   |
|            | Ca(ICC2/PI489777)SNP_08900 | 1561 | T | A | 8  | 6  | -- | --   |
|            | Ca(ICC2/PI489777)SNP_08901 | 1592 | C | G | 12 | 6  | -- | --   |
|            | Ca(ICC2/PI489777)SNP_08902 | 1708 | G | A | 13 | 5  | -- | --   |
| CakTC09187 | Ca(ICC2/PI489777)SNP_08903 | 90   | T | C | 3  | 9  | -- | --   |
| CakTC38761 | Ca(ICC2/PI489777)SNP_08904 | 207  | G | A | 3  | 19 | -- | bHLH |
|            | Ca(ICC2/PI489777)SNP_08905 | 224  | G | A | 5  | 19 | -- | bHLH |
| CakTC35798 | Ca(ICC2/PI489777)SNP_08906 | 77   | A | T | 5  | 4  | -- | --   |
| CakTC41185 | Ca(ICC2/PI489777)SNP_08907 | 1358 | C | G | 31 | 16 | -- | --   |
|            | Ca(ICC2/PI489777)SNP_08908 | 1571 | C | T | 27 | 11 | -- | --   |
|            | Ca(ICC2/PI489777)SNP_08909 | 1640 | T | C | 21 | 11 | -- | --   |
|            | Ca(ICC2/PI489777)SNP_08910 | 1805 | C | T | 33 | 15 | -- | --   |
|            | Ca(ICC2/PI489777)SNP_08911 | 1857 | A | G | 40 | 18 | -- | --   |
|            | Ca(ICC2/PI489777)SNP_08912 | 1890 | G | C | 34 | 17 | -- | --   |
|            | Ca(ICC2/PI489777)SNP_08913 | 1903 | C | T | 34 | 18 | -- | --   |
|            | Ca(ICC2/PI489777)SNP_08914 | 1913 | A | G | 33 | 16 | -- | --   |
|            | Ca(ICC2/PI489777)SNP_08915 | 2139 | G | A | 10 | 11 | -- | --   |
| CakTC22909 | Ca(ICC2/PI489777)SNP_08916 | 689  | A | G | 27 | 10 | -- | --   |
|            | Ca(ICC2/PI489777)SNP_08917 | 1055 | A | G | 12 | 4  | -- | --   |
|            | Ca(ICC2/PI489777)SNP_08918 | 1841 | A | C | 28 | 20 | -- | --   |
|            | Ca(ICC2/PI489777)SNP_08919 | 2668 | G | C | 13 | 7  | -- | --   |
| CakTC11548 | Ca(ICC2/PI489777)SNP_08920 | 371  | A | G | 9  | 3  | -- | --   |
| CakTC12493 | Ca(ICC2/PI489777)SNP_08921 | 34   | C | A | 6  | 3  | -- | TPR  |
|            | Ca(ICC2/PI489777)SNP_08922 | 35   | T | C | 6  | 3  | -- | TPR  |
|            | Ca(ICC2/PI489777)SNP_08923 | 80   | C | A | 8  | 4  | -- | TPR  |
|            | Ca(ICC2/PI489777)SNP_08924 | 544  | C | T | 10 | 5  | -- | TPR  |
|            | Ca(ICC2/PI489777)SNP_08925 | 756  | G | T | 5  | 4  | -- | TPR  |
| CakTC42833 | Ca(ICC2/PI489777)SNP_08926 | 1789 | T | C | 4  | 4  | -- | C2H2 |
|            | Ca(ICC2/PI489777)SNP_08927 | 1800 | C | T | 4  | 4  | -- | C2H2 |
| CakTC10059 | Ca(ICC2/PI489777)SNP_08928 | 1905 | C | T | 19 | 5  | -- | --   |
|            | Ca(ICC2/PI489777)SNP_08929 | 2191 | C | A | 18 | 3  | -- | --   |
|            | Ca(ICC2/PI489777)SNP_08930 | 3291 | C | T | 10 | 17 | -- | --   |
|            | Ca(ICC2/PI489777)SNP_08931 | 3508 | A | T | 10 | 11 | -- | --   |
| CakTC40839 | Ca(ICC2/PI489777)SNP_08932 | 819  | T | C | 20 | 4  | -- | --   |
|            | Ca(ICC2/PI489777)SNP_08933 | 906  | T | C | 18 | 8  | -- | --   |
| CakTC10678 | Ca(ICC2/PI489777)SNP_08934 | 162  | T | C | 4  | 3  | -- | --   |
| CakTC38821 | Ca(ICC2/PI489777)SNP_08935 | 573  | G | A | 9  | 8  | -- | --   |
|            | Ca(ICC2/PI489777)SNP_08936 | 664  | C | G | 8  | 10 | -- | --   |
|            | Ca(ICC2/PI489777)SNP_08937 | 1002 | A | G | 22 | 4  | -- | --   |
|            | Ca(ICC2/PI489777)SNP_08938 | 1174 | A | G | 21 | 4  | -- | --   |
|            | Ca(ICC2/PI489777)SNP_08939 | 1194 | G | C | 21 | 4  | -- | --   |
| CakTC28120 | Ca(ICC2/PI489777)SNP_08940 | 286  | T | C | 10 | 3  | -- | --   |
|            | Ca(ICC2/PI489777)SNP_08941 | 1149 | T | C | 12 | 6  | -- | --   |
|            | Ca(ICC2/PI489777)SNP_08942 | 1772 | G | A | 3  | 3  | -- | --   |
|            | Ca(ICC2/PI489777)SNP_08943 | 3143 | T | C | 34 | 5  | -- | --   |
| CakTC38915 | Ca(ICC2/PI489777)SNP_08944 | 235  | G | A | 29 | 18 | -- | --   |
| CakTC43135 | Ca(ICC2/PI489777)SNP_08945 | 100  | G | T | 28 | 32 | -- | --   |
|            | Ca(ICC2/PI489777)SNP_08946 | 354  | C | A | 31 | 36 | -- | --   |
|            | Ca(ICC2/PI489777)SNP_08947 | 564  | A | G | 15 | 16 | -- | --   |
|            | Ca(ICC2/PI489777)SNP_08948 | 878  | A | G | 5  | 4  | -- | --   |
| CakTC08183 | Ca(ICC2/PI489777)SNP_08949 | 298  | G | A | 5  | 10 | -- | --   |

|            |                            |      |   |   |    |    |        |           |
|------------|----------------------------|------|---|---|----|----|--------|-----------|
|            | Ca(ICC2/PI489777)SNP_08950 | 415  | G | A | 6  | 10 | --     | --        |
|            | Ca(ICC2/PI489777)SNP_08951 | 504  | T | A | 5  | 7  | --     | --        |
|            | Ca(ICC2/PI489777)SNP_08952 | 558  | T | G | 6  | 5  | --     | --        |
| CakTC37636 | Ca(ICC2/PI489777)SNP_08953 | 790  | C | T | 12 | 12 | --     | --        |
|            | Ca(ICC2/PI489777)SNP_08954 | 1274 | C | G | 15 | 8  | --     | --        |
| CakTC41345 | Ca(ICC2/PI489777)SNP_08955 | 714  | T | C | 8  | 3  | Mature | Leaf      |
|            | Ca(ICC2/PI489777)SNP_08956 | 891  | T | C | 10 | 8  | Mature | Leaf      |
|            | Ca(ICC2/PI489777)SNP_08957 | 1074 | A | C | 14 | 10 | Mature | Leaf      |
|            | Ca(ICC2/PI489777)SNP_08958 | 1176 | C | T | 15 | 9  | Mature | Leaf      |
| CakTC37839 | Ca(ICC2/PI489777)SNP_08959 | 14   | G | A | 14 | 9  | --     | --        |
|            | Ca(ICC2/PI489777)SNP_08960 | 295  | T | G | 18 | 15 | --     | --        |
|            | Ca(ICC2/PI489777)SNP_08961 | 415  | C | T | 23 | 28 | --     | --        |
|            | Ca(ICC2/PI489777)SNP_08962 | 424  | T | A | 16 | 29 | --     | --        |
|            | Ca(ICC2/PI489777)SNP_08963 | 487  | G | A | 24 | 35 | --     | --        |
|            | Ca(ICC2/PI489777)SNP_08964 | 1099 | T | C | 34 | 22 | --     | --        |
|            | Ca(ICC2/PI489777)SNP_08965 | 1480 | T | A | 33 | 16 | --     | --        |
|            | Ca(ICC2/PI489777)SNP_08966 | 1590 | T | C | 27 | 5  | --     | --        |
|            | Ca(ICC2/PI489777)SNP_08967 | 1628 | G | C | 10 | 3  | --     | --        |
| CakTC24904 | Ca(ICC2/PI489777)SNP_08968 | 1227 | C | T | 49 | 14 | --     | AP2-EREBP |
| CakTC26757 | Ca(ICC2/PI489777)SNP_08969 | 723  | G | A | 8  | 8  | --     | --        |
|            | Ca(ICC2/PI489777)SNP_08970 | 906  | A | G | 9  | 3  | --     | --        |
|            | Ca(ICC2/PI489777)SNP_08971 | 969  | T | C | 8  | 3  | --     | --        |
|            | Ca(ICC2/PI489777)SNP_08972 | 1156 | C | T | 11 | 5  | --     | --        |
| CakTC35906 | Ca(ICC2/PI489777)SNP_08973 | 2784 | C | T | 13 | 9  | --     | --        |
| CakTC28203 | Ca(ICC2/PI489777)SNP_08974 | 616  | A | G | 31 | 4  | --     | --        |
|            | Ca(ICC2/PI489777)SNP_08975 | 659  | T | G | 29 | 5  | --     | --        |
|            | Ca(ICC2/PI489777)SNP_08976 | 724  | A | G | 32 | 6  | --     | --        |
|            | Ca(ICC2/PI489777)SNP_08977 | 897  | A | G | 29 | 10 | --     | --        |
|            | Ca(ICC2/PI489777)SNP_08978 | 989  | A | C | 3  | 11 | --     | --        |
|            | Ca(ICC2/PI489777)SNP_08979 | 1181 | C | T | 5  | 14 | --     | --        |
|            | Ca(ICC2/PI489777)SNP_08980 | 1506 | A | G | 6  | 10 | --     | --        |
|            | Ca(ICC2/PI489777)SNP_08981 | 1515 | A | G | 7  | 9  | --     | --        |
|            | Ca(ICC2/PI489777)SNP_08982 | 1520 | G | C | 8  | 9  | --     | --        |
|            | Ca(ICC2/PI489777)SNP_08983 | 1525 | T | C | 7  | 10 | --     | --        |
| CakTC11382 | Ca(ICC2/PI489777)SNP_08984 | 118  | C | T | 10 | 8  | --     | --        |
|            | Ca(ICC2/PI489777)SNP_08985 | 147  | G | C | 11 | 11 | --     | --        |
|            | Ca(ICC2/PI489777)SNP_08986 | 199  | C | T | 11 | 11 | --     | --        |
|            | Ca(ICC2/PI489777)SNP_08987 | 213  | T | A | 11 | 10 | --     | --        |
|            | Ca(ICC2/PI489777)SNP_08988 | 262  | A | G | 11 | 12 | --     | --        |
| CakTC24606 | Ca(ICC2/PI489777)SNP_08989 | 166  | G | C | 10 | 10 | --     | --        |
|            | Ca(ICC2/PI489777)SNP_08990 | 520  | A | G | 27 | 8  | --     | --        |
|            | Ca(ICC2/PI489777)SNP_08991 | 699  | A | G | 34 | 4  | --     | --        |
|            | Ca(ICC2/PI489777)SNP_08992 | 743  | G | A | 40 | 3  | --     | --        |
| CakTC31307 | Ca(ICC2/PI489777)SNP_08993 | 1282 | C | G | 5  | 3  | --     | --        |
| CakTC23297 | Ca(ICC2/PI489777)SNP_08994 | 1352 | T | C | 3  | 4  | --     | --        |
|            | Ca(ICC2/PI489777)SNP_08995 | 1542 | A | G | 3  | 4  | --     | --        |
| CakTC11105 | Ca(ICC2/PI489777)SNP_08996 | 1167 | T | C | 6  | 8  | --     | --        |
|            | Ca(ICC2/PI489777)SNP_08997 | 1494 | C | T | 8  | 5  | --     | --        |
|            | Ca(ICC2/PI489777)SNP_08998 | 1857 | A | G | 4  | 7  | --     | --        |
|            | Ca(ICC2/PI489777)SNP_08999 | 1886 | A | G | 4  | 7  | --     | --        |
| CakTC31750 | Ca(ICC2/PI489777)SNP_09000 | 210  | C | G | 7  | 4  | --     | --        |
|            | Ca(ICC2/PI489777)SNP_09001 | 213  | C | G | 7  | 4  | --     | --        |
|            | Ca(ICC2/PI489777)SNP_09002 | 280  | A | G | 4  | 3  | --     | --        |
| CakTC30765 | Ca(ICC2/PI489777)SNP_09003 | 1650 | A | T | 8  | 11 | --     | --        |
|            | Ca(ICC2/PI489777)SNP_09004 | 1656 | T | G | 8  | 14 | --     | --        |
|            | Ca(ICC2/PI489777)SNP_09005 | 1704 | T | C | 7  | 17 | --     | --        |
|            | Ca(ICC2/PI489777)SNP_09006 | 2754 | T | G | 11 | 4  | --     | --        |
|            | Ca(ICC2/PI489777)SNP_09007 | 3068 | G | A | 5  | 6  | --     | --        |
|            | Ca(ICC2/PI489777)SNP_09008 | 3132 | T | C | 5  | 8  | --     | --        |
|            | Ca(ICC2/PI489777)SNP_09009 | 3886 | A | T | 8  | 3  | --     | --        |
|            | Ca(ICC2/PI489777)SNP_09010 | 4257 | T | A | 11 | 6  | --     | --        |
| CakTC11508 | Ca(ICC2/PI489777)SNP_09011 | 171  | A | T | 24 | 15 | --     | --        |
| CakTC36206 | Ca(ICC2/PI489777)SNP_09012 | 1906 | T | C | 13 | 10 | --     | --        |
| CakTC38803 | Ca(ICC2/PI489777)SNP_09013 | 729  | T | C | 12 | 4  | --     | MYB       |
|            | Ca(ICC2/PI489777)SNP_09014 | 1050 | T | C | 12 | 3  | --     | MYB       |
|            | Ca(ICC2/PI489777)SNP_09015 | 1135 | G | T | 13 | 5  | --     | MYB       |
|            | Ca(ICC2/PI489777)SNP_09016 | 1163 | C | T | 12 | 5  | --     | MYB       |
|            | Ca(ICC2/PI489777)SNP_09017 | 1175 | T | C | 13 | 5  | --     | MYB       |
| CakTC15441 | Ca(ICC2/PI489777)SNP_09018 | 355  | G | T | 3  | 4  | --     | --        |
| CakTC37390 | Ca(ICC2/PI489777)SNP_09019 | 96   | C | T | 5  | 4  | --     | --        |
|            | Ca(ICC2/PI489777)SNP_09020 | 182  | T | C | 5  | 20 | --     | --        |
|            | Ca(ICC2/PI489777)SNP_09021 | 209  | T | C | 4  | 22 | --     | --        |
|            | Ca(ICC2/PI489777)SNP_09022 | 211  | G | A | 3  | 21 | --     | --        |
|            | Ca(ICC2/PI489777)SNP_09023 | 896  | T | G | 23 | 41 | --     | --        |

|            |                            |      |   |   |    |    |    |          |
|------------|----------------------------|------|---|---|----|----|----|----------|
|            | Ca(ICC2/PI489777)SNP_09024 | 986  | C | T | 24 | 41 | -- | --       |
|            | Ca(ICC2/PI489777)SNP_09025 | 1072 | G | A | 27 | 36 | -- | --       |
| CakTC27466 | Ca(ICC2/PI489777)SNP_09026 | 567  | C | T | 81 | 29 | -- | --       |
|            | Ca(ICC2/PI489777)SNP_09027 | 783  | C | T | 60 | 28 | -- | --       |
|            | Ca(ICC2/PI489777)SNP_09028 | 882  | C | T | 62 | 23 | -- | --       |
|            | Ca(ICC2/PI489777)SNP_09029 | 960  | C | T | 44 | 12 | -- | --       |
| CakTC24428 | Ca(ICC2/PI489777)SNP_09030 | 191  | T | C | 9  | 4  | -- | --       |
|            | Ca(ICC2/PI489777)SNP_09031 | 250  | C | T | 10 | 7  | -- | --       |
|            | Ca(ICC2/PI489777)SNP_09032 | 388  | A | G | 12 | 8  | -- | --       |
|            | Ca(ICC2/PI489777)SNP_09033 | 572  | G | A | 16 | 6  | -- | --       |
|            | Ca(ICC2/PI489777)SNP_09034 | 679  | G | A | 16 | 5  | -- | --       |
|            | Ca(ICC2/PI489777)SNP_09035 | 694  | G | T | 16 | 6  | -- | --       |
| CakTC28292 | Ca(ICC2/PI489777)SNP_09036 | 787  | G | T | 3  | 4  | -- | --       |
| CakTC40770 | Ca(ICC2/PI489777)SNP_09037 | 307  | A | G | 26 | 31 | -- | --       |
|            | Ca(ICC2/PI489777)SNP_09038 | 400  | C | A | 25 | 24 | -- | --       |
|            | Ca(ICC2/PI489777)SNP_09039 | 735  | T | A | 27 | 17 | -- | --       |
|            | Ca(ICC2/PI489777)SNP_09040 | 774  | C | G | 27 | 16 | -- | --       |
|            | Ca(ICC2/PI489777)SNP_09041 | 815  | C | T | 23 | 6  | -- | --       |
| CakTC42021 | Ca(ICC2/PI489777)SNP_09042 | 332  | A | G | 13 | 6  | -- | --       |
|            | Ca(ICC2/PI489777)SNP_09043 | 339  | A | T | 14 | 9  | -- | --       |
|            | Ca(ICC2/PI489777)SNP_09044 | 822  | C | T | 8  | 15 | -- | --       |
| CakTC37812 | Ca(ICC2/PI489777)SNP_09045 | 494  | T | C | 5  | 22 | -- | --       |
|            | Ca(ICC2/PI489777)SNP_09046 | 536  | A | G | 6  | 21 | -- | --       |
|            | Ca(ICC2/PI489777)SNP_09047 | 734  | C | G | 7  | 15 | -- | --       |
|            | Ca(ICC2/PI489777)SNP_09048 | 797  | A | C | 7  | 18 | -- | --       |
|            | Ca(ICC2/PI489777)SNP_09049 | 893  | C | A | 7  | 11 | -- | --       |
|            | Ca(ICC2/PI489777)SNP_09050 | 1106 | G | A | 6  | 7  | -- | --       |
|            | Ca(ICC2/PI489777)SNP_09051 | 1731 | C | T | 4  | 4  | -- | --       |
| CakTC40509 | Ca(ICC2/PI489777)SNP_09052 | 135  | T | C | 27 | 12 | -- | --       |
|            | Ca(ICC2/PI489777)SNP_09053 | 420  | C | A | 52 | 15 | -- | --       |
| CakTC23779 | Ca(ICC2/PI489777)SNP_09054 | 1877 | A | G | 3  | 3  | -- | --       |
| CakTC23278 | Ca(ICC2/PI489777)SNP_09055 | 30   | C | T | 8  | 5  | -- | --       |
|            | Ca(ICC2/PI489777)SNP_09056 | 144  | C | A | 16 | 10 | -- | --       |
|            | Ca(ICC2/PI489777)SNP_09057 | 182  | A | G | 21 | 16 | -- | --       |
|            | Ca(ICC2/PI489777)SNP_09058 | 206  | G | A | 20 | 15 | -- | --       |
| CakTC36316 | Ca(ICC2/PI489777)SNP_09059 | 1617 | G | A | 51 | 33 | -- | --       |
|            | Ca(ICC2/PI489777)SNP_09060 | 2421 | T | A | 32 | 32 | -- | --       |
| CakTC35414 | Ca(ICC2/PI489777)SNP_09061 | 645  | C | T | 4  | 7  | -- | --       |
| CakTC27653 | Ca(ICC2/PI489777)SNP_09062 | 691  | A | G | 10 | 10 | -- | --       |
|            | Ca(ICC2/PI489777)SNP_09063 | 943  | T | C | 5  | 12 | -- | --       |
| CakTC42690 | Ca(ICC2/PI489777)SNP_09064 | 761  | C | T | 29 | 7  | -- | --       |
| CakTC35378 | Ca(ICC2/PI489777)SNP_09065 | 865  | T | C | 8  | 8  | -- | --       |
|            | Ca(ICC2/PI489777)SNP_09066 | 1284 | A | G | 16 | 6  | -- | --       |
|            | Ca(ICC2/PI489777)SNP_09067 | 1562 | G | A | 12 | 9  | -- | --       |
|            | Ca(ICC2/PI489777)SNP_09068 | 1602 | C | T | 15 | 13 | -- | --       |
|            | Ca(ICC2/PI489777)SNP_09069 | 1707 | G | A | 15 | 11 | -- | --       |
|            | Ca(ICC2/PI489777)SNP_09070 | 2094 | A | C | 15 | 7  | -- | --       |
|            | Ca(ICC2/PI489777)SNP_09071 | 2142 | C | T | 15 | 7  | -- | --       |
|            | Ca(ICC2/PI489777)SNP_09072 | 2260 | C | G | 7  | 7  | -- | --       |
|            | Ca(ICC2/PI489777)SNP_09073 | 3067 | C | A | 12 | 3  | -- | --       |
|            | Ca(ICC2/PI489777)SNP_09074 | 3258 | C | T | 12 | 3  | -- | --       |
|            | Ca(ICC2/PI489777)SNP_09075 | 3403 | T | G | 12 | 7  | -- | --       |
|            | Ca(ICC2/PI489777)SNP_09076 | 4031 | C | T | 7  | 6  | -- | --       |
| CakTC30577 | Ca(ICC2/PI489777)SNP_09077 | 645  | G | A | 23 | 6  | -- | C2C2-Dof |
|            | Ca(ICC2/PI489777)SNP_09078 | 722  | C | T | 25 | 6  | -- | C2C2-Dof |
|            | Ca(ICC2/PI489777)SNP_09079 | 789  | T | A | 18 | 5  | -- | C2C2-Dof |
|            | Ca(ICC2/PI489777)SNP_09080 | 825  | T | C | 14 | 5  | -- | C2C2-Dof |
| CakTC39376 | Ca(ICC2/PI489777)SNP_09081 | 226  | T | G | 9  | 3  | -- | --       |
|            | Ca(ICC2/PI489777)SNP_09082 | 384  | A | G | 8  | 4  | -- | --       |
|            | Ca(ICC2/PI489777)SNP_09083 | 390  | A | G | 8  | 5  | -- | --       |
|            | Ca(ICC2/PI489777)SNP_09084 | 541  | T | G | 3  | 5  | -- | --       |
| CakTC38852 | Ca(ICC2/PI489777)SNP_09085 | 350  | G | T | 3  | 3  | -- | --       |
|            | Ca(ICC2/PI489777)SNP_09086 | 449  | C | T | 3  | 13 | -- | --       |
|            | Ca(ICC2/PI489777)SNP_09087 | 630  | C | A | 8  | 12 | -- | --       |
|            | Ca(ICC2/PI489777)SNP_09088 | 967  | A | G | 7  | 12 | -- | --       |
|            | Ca(ICC2/PI489777)SNP_09089 | 1022 | G | A | 10 | 10 | -- | --       |
|            | Ca(ICC2/PI489777)SNP_09090 | 1079 | C | A | 10 | 9  | -- | --       |
| CakTC30337 | Ca(ICC2/PI489777)SNP_09091 | 41   | G | A | 4  | 3  | -- | --       |
|            | Ca(ICC2/PI489777)SNP_09092 | 279  | T | G | 8  | 8  | -- | --       |
|            | Ca(ICC2/PI489777)SNP_09093 | 310  | C | T | 8  | 8  | -- | --       |
|            | Ca(ICC2/PI489777)SNP_09094 | 541  | A | G | 3  | 10 | -- | --       |
|            | Ca(ICC2/PI489777)SNP_09095 | 675  | A | T | 3  | 5  | -- | --       |
| CakTC40207 | Ca(ICC2/PI489777)SNP_09096 | 1289 | C | G | 8  | 4  | -- | --       |
| CakTC27995 | Ca(ICC2/PI489777)SNP_09097 | 304  | T | C | 5  | 6  | -- | --       |

|            |                            |      |   |   |     |     |           |          |
|------------|----------------------------|------|---|---|-----|-----|-----------|----------|
|            | Ca(ICC2/PI489777)SNP_09098 | 430  | C | T | 9   | 5   | --        | --       |
|            | Ca(ICC2/PI489777)SNP_09099 | 487  | A | T | 9   | 5   | --        | --       |
|            | Ca(ICC2/PI489777)SNP_09100 | 736  | C | T | 8   | 5   | --        | --       |
| CakTC30138 | Ca(ICC2/PI489777)SNP_09101 | 265  | A | G | 6   | 3   | --        | --       |
| CakTC39937 | Ca(ICC2/PI489777)SNP_09102 | 55   | G | C | 8   | 4   | --        | --       |
|            | Ca(ICC2/PI489777)SNP_09103 | 157  | A | C | 26  | 11  | --        | --       |
|            | Ca(ICC2/PI489777)SNP_09104 | 332  | A | G | 37  | 21  | --        | --       |
|            | Ca(ICC2/PI489777)SNP_09105 | 694  | T | A | 30  | 11  | --        | --       |
|            | Ca(ICC2/PI489777)SNP_09106 | 1086 | G | T | 16  | 8   | --        | --       |
|            | Ca(ICC2/PI489777)SNP_09107 | 1114 | C | T | 14  | 7   | --        | --       |
| CakTC01036 | Ca(ICC2/PI489777)SNP_09108 | 3360 | G | T | 4   | 5   | --        | --       |
| CakTC30941 | Ca(ICC2/PI489777)SNP_09109 | 201  | G | T | 7   | 5   | Root      | --       |
| CakTC37546 | Ca(ICC2/PI489777)SNP_09110 | 415  | C | T | 10  | 4   | --        | --       |
| CakTC42667 | Ca(ICC2/PI489777)SNP_09111 | 382  | G | A | 24  | 7   | --        | Trihelix |
|            | Ca(ICC2/PI489777)SNP_09112 | 1653 | G | A | 3   | 5   | --        | Trihelix |
| CakTC13101 | Ca(ICC2/PI489777)SNP_09113 | 264  | A | G | 12  | 11  | --        | --       |
|            | Ca(ICC2/PI489777)SNP_09114 | 497  | G | C | 18  | 5   | --        | --       |
| CakTC02895 | Ca(ICC2/PI489777)SNP_09115 | 81   | A | G | 3   | 3   | --        | --       |
| CakTC39325 | Ca(ICC2/PI489777)SNP_09116 | 1361 | G | C | 8   | 4   | --        | G2-like  |
| CakTC14943 | Ca(ICC2/PI489777)SNP_09117 | 89   | C | A | 14  | 20  | --        | --       |
|            | Ca(ICC2/PI489777)SNP_09118 | 724  | T | G | 72  | 88  | --        | --       |
| CakTC41188 | Ca(ICC2/PI489777)SNP_09119 | 59   | C | G | 3   | 3   | --        | --       |
|            | Ca(ICC2/PI489777)SNP_09120 | 103  | G | A | 4   | 3   | --        | --       |
|            | Ca(ICC2/PI489777)SNP_09121 | 160  | G | T | 4   | 3   | --        | --       |
|            | Ca(ICC2/PI489777)SNP_09122 | 219  | C | G | 6   | 3   | --        | --       |
|            | Ca(ICC2/PI489777)SNP_09123 | 319  | A | G | 6   | 3   | --        | --       |
|            | Ca(ICC2/PI489777)SNP_09124 | 352  | C | G | 7   | 3   | --        | --       |
|            | Ca(ICC2/PI489777)SNP_09125 | 381  | C | T | 7   | 9   | --        | --       |
|            | Ca(ICC2/PI489777)SNP_09126 | 431  | G | T | 7   | 6   | --        | --       |
|            | Ca(ICC2/PI489777)SNP_09127 | 976  | A | G | 4   | 4   | --        | --       |
|            | Ca(ICC2/PI489777)SNP_09128 | 1436 | A | G | 10  | 6   | --        | --       |
|            | Ca(ICC2/PI489777)SNP_09129 | 2207 | A | T | 8   | 7   | --        | --       |
| CakTC27309 | Ca(ICC2/PI489777)SNP_09130 | 452  | C | T | 6   | 7   | --        | --       |
|            | Ca(ICC2/PI489777)SNP_09131 | 1316 | G | A | 13  | 10  | --        | --       |
| CakTC38413 | Ca(ICC2/PI489777)SNP_09132 | 170  | G | A | 38  | 18  | --        | --       |
|            | Ca(ICC2/PI489777)SNP_09133 | 256  | C | T | 45  | 19  | --        | --       |
|            | Ca(ICC2/PI489777)SNP_09134 | 639  | A | G | 34  | 8   | --        | --       |
|            | Ca(ICC2/PI489777)SNP_09135 | 673  | G | A | 29  | 8   | --        | --       |
|            | Ca(ICC2/PI489777)SNP_09136 | 925  | A | G | 31  | 12  | --        | --       |
|            | Ca(ICC2/PI489777)SNP_09137 | 954  | A | G | 29  | 11  | --        | --       |
|            | Ca(ICC2/PI489777)SNP_09138 | 1112 | C | T | 8   | 6   | --        | --       |
| CakTC37398 | Ca(ICC2/PI489777)SNP_09139 | 801  | C | T | 53  | 22  | --        | --       |
|            | Ca(ICC2/PI489777)SNP_09140 | 858  | C | A | 48  | 21  | --        | --       |
|            | Ca(ICC2/PI489777)SNP_09141 | 864  | T | C | 50  | 16  | --        | --       |
|            | Ca(ICC2/PI489777)SNP_09142 | 894  | C | T | 49  | 22  | --        | --       |
|            | Ca(ICC2/PI489777)SNP_09143 | 930  | C | T | 41  | 32  | --        | --       |
|            | Ca(ICC2/PI489777)SNP_09144 | 1287 | T | C | 24  | 21  | --        | --       |
| CakTC38457 | Ca(ICC2/PI489777)SNP_09145 | 468  | T | G | 6   | 3   | --        | --       |
| CakTC29812 | Ca(ICC2/PI489777)SNP_09146 | 239  | C | T | 3   | 3   | --        | TRAF     |
| CakTC42309 | Ca(ICC2/PI489777)SNP_09147 | 560  | T | C | 51  | 18  | --        | --       |
|            | Ca(ICC2/PI489777)SNP_09148 | 581  | T | G | 48  | 19  | --        | --       |
|            | Ca(ICC2/PI489777)SNP_09149 | 744  | C | T | 20  | 6   | --        | --       |
| CakTC35477 | Ca(ICC2/PI489777)SNP_09150 | 941  | G | A | 8   | 4   | --        | --       |
|            | Ca(ICC2/PI489777)SNP_09151 | 1320 | A | G | 11  | 3   | --        | --       |
|            | Ca(ICC2/PI489777)SNP_09152 | 2250 | T | C | 7   | 4   | --        | --       |
|            | Ca(ICC2/PI489777)SNP_09153 | 2607 | T | C | 5   | 3   | --        | --       |
|            | Ca(ICC2/PI489777)SNP_09154 | 2628 | G | A | 8   | 4   | --        | --       |
|            | Ca(ICC2/PI489777)SNP_09155 | 2937 | C | A | 10  | 5   | --        | --       |
|            | Ca(ICC2/PI489777)SNP_09156 | 3456 | A | C | 10  | 3   | --        | --       |
|            | Ca(ICC2/PI489777)SNP_09157 | 3513 | T | C | 11  | 3   | --        | --       |
|            | Ca(ICC2/PI489777)SNP_09158 | 3702 | T | C | 5   | 7   | --        | --       |
|            | Ca(ICC2/PI489777)SNP_09159 | 3741 | T | G | 5   | 7   | --        | --       |
|            | Ca(ICC2/PI489777)SNP_09160 | 3807 | A | G | 5   | 5   | --        | --       |
|            | Ca(ICC2/PI489777)SNP_09161 | 3878 | G | T | 3   | 5   | --        | --       |
| CakTC28756 | Ca(ICC2/PI489777)SNP_09162 | 409  | G | C | 5   | 7   | Young_pod | --       |
|            | Ca(ICC2/PI489777)SNP_09163 | 727  | A | G | 4   | 6   | Young_pod | --       |
| CakTC08721 | Ca(ICC2/PI489777)SNP_09164 | 545  | C | T | 3   | 3   | --        | --       |
| CakTC36018 | Ca(ICC2/PI489777)SNP_09165 | 1303 | C | T | 13  | 8   | --        | --       |
| CakTC28544 | Ca(ICC2/PI489777)SNP_09166 | 84   | A | G | 3   | 16  | Root      | --       |
|            | Ca(ICC2/PI489777)SNP_09167 | 140  | G | C | 25  | 20  | Root      | --       |
|            | Ca(ICC2/PI489777)SNP_09168 | 156  | A | C | 26  | 19  | Root      | --       |
|            | Ca(ICC2/PI489777)SNP_09169 | 168  | G | A | 31  | 24  | Root      | --       |
|            | Ca(ICC2/PI489777)SNP_09170 | 286  | A | G | 52  | 19  | Root      | --       |
|            | Ca(ICC2/PI489777)SNP_09171 | 801  | A | G | 135 | 144 | Root      | --       |

|            |                            |      |   |   |     |     |           |      |
|------------|----------------------------|------|---|---|-----|-----|-----------|------|
|            | Ca(ICC2/PI489777)SNP_09172 | 807  | C | T | 129 | 139 | Root      | --   |
|            | Ca(ICC2/PI489777)SNP_09173 | 879  | A | G | 142 | 162 | Root      | --   |
|            | Ca(ICC2/PI489777)SNP_09174 | 978  | A | G | 143 | 147 | Root      | --   |
|            | Ca(ICC2/PI489777)SNP_09175 | 1275 | G | A | 64  | 55  | Root      | --   |
|            | Ca(ICC2/PI489777)SNP_09176 | 1386 | G | A | 53  | 50  | Root      | --   |
|            | Ca(ICC2/PI489777)SNP_09177 | 1443 | C | A | 48  | 45  | Root      | --   |
|            | Ca(ICC2/PI489777)SNP_09178 | 1446 | A | G | 49  | 47  | Root      | --   |
| CakTC35611 | Ca(ICC2/PI489777)SNP_09179 | 2839 | G | A | 9   | 4   | --        | --   |
| CakTC26061 | Ca(ICC2/PI489777)SNP_09180 | 1346 | A | T | 7   | 4   | Young_pod | --   |
|            | Ca(ICC2/PI489777)SNP_09181 | 1431 | C | T | 8   | 4   | Young_pod | --   |
| CakTC31221 | Ca(ICC2/PI489777)SNP_09182 | 36   | A | G | 6   | 4   | --        | --   |
|            | Ca(ICC2/PI489777)SNP_09183 | 72   | T | A | 7   | 4   | --        | --   |
|            | Ca(ICC2/PI489777)SNP_09184 | 99   | G | A | 8   | 5   | --        | --   |
|            | Ca(ICC2/PI489777)SNP_09185 | 921  | T | G | 4   | 4   | --        | --   |
| CakTC37580 | Ca(ICC2/PI489777)SNP_09186 | 403  | G | T | 3   | 5   | Root      | --   |
|            | Ca(ICC2/PI489777)SNP_09187 | 708  | C | T | 9   | 7   | Root      | --   |
|            | Ca(ICC2/PI489777)SNP_09188 | 1008 | C | T | 7   | 9   | Root      | --   |
| CakTC39651 | Ca(ICC2/PI489777)SNP_09189 | 341  | A | G | 23  | 13  | --        | --   |
|            | Ca(ICC2/PI489777)SNP_09190 | 344  | T | C | 22  | 12  | --        | --   |
|            | Ca(ICC2/PI489777)SNP_09191 | 494  | A | G | 22  | 16  | --        | --   |
|            | Ca(ICC2/PI489777)SNP_09192 | 1303 | G | C | 5   | 4   | --        | --   |
| CakTC23995 | Ca(ICC2/PI489777)SNP_09193 | 537  | C | T | 20  | 3   | --        | WRKY |
| CakTC30773 | Ca(ICC2/PI489777)SNP_09194 | 2085 | A | C | 3   | 4   | Flower    | bud  |
| CakTC33942 | Ca(ICC2/PI489777)SNP_09195 | 89   | C | T | 6   | 5   | Shoot     | --   |
|            | Ca(ICC2/PI489777)SNP_09196 | 563  | C | T | 4   | 4   | Shoot     | --   |
|            | Ca(ICC2/PI489777)SNP_09197 | 565  | A | G | 4   | 4   | Shoot     | --   |
|            | Ca(ICC2/PI489777)SNP_09198 | 671  | A | G | 3   | 5   | Shoot     | --   |
|            | Ca(ICC2/PI489777)SNP_09199 | 1573 | A | G | 5   | 3   | Shoot     | --   |
|            | Ca(ICC2/PI489777)SNP_09200 | 1728 | T | G | 4   | 3   | Shoot     | --   |
| CakTC41903 | Ca(ICC2/PI489777)SNP_09201 | 591  | T | C | 3   | 5   | --        | --   |
|            | Ca(ICC2/PI489777)SNP_09202 | 1026 | G | T | 10  | 6   | --        | --   |
|            | Ca(ICC2/PI489777)SNP_09203 | 1295 | C | T | 7   | 5   | --        | --   |
|            | Ca(ICC2/PI489777)SNP_09204 | 1392 | G | A | 6   | 9   | --        | --   |
|            | Ca(ICC2/PI489777)SNP_09205 | 1419 | A | T | 6   | 11  | --        | --   |
|            | Ca(ICC2/PI489777)SNP_09206 | 1526 | A | C | 3   | 11  | --        | --   |
|            | Ca(ICC2/PI489777)SNP_09207 | 1535 | C | T | 3   | 11  | --        | --   |
|            | Ca(ICC2/PI489777)SNP_09208 | 1622 | G | A | 5   | 8   | --        | --   |
|            | Ca(ICC2/PI489777)SNP_09209 | 1662 | G | T | 5   | 8   | --        | --   |
|            | Ca(ICC2/PI489777)SNP_09210 | 1665 | G | A | 4   | 8   | --        | --   |
|            | Ca(ICC2/PI489777)SNP_09211 | 1725 | T | G | 5   | 7   | --        | --   |
|            | Ca(ICC2/PI489777)SNP_09212 | 1792 | C | G | 5   | 6   | --        | --   |
| CakTC27934 | Ca(ICC2/PI489777)SNP_09213 | 358  | C | T | 3   | 3   | --        | --   |
|            | Ca(ICC2/PI489777)SNP_09214 | 422  | G | A | 3   | 3   | --        | --   |
|            | Ca(ICC2/PI489777)SNP_09215 | 1331 | T | C | 5   | 4   | --        | --   |
|            | Ca(ICC2/PI489777)SNP_09216 | 1386 | A | G | 6   | 4   | --        | --   |
| CakTC32658 | Ca(ICC2/PI489777)SNP_09217 | 1048 | G | C | 16  | 9   | --        | --   |
|            | Ca(ICC2/PI489777)SNP_09218 | 1795 | A | C | 22  | 27  | --        | --   |
|            | Ca(ICC2/PI489777)SNP_09219 | 1992 | T | G | 23  | 23  | --        | --   |
|            | Ca(ICC2/PI489777)SNP_09220 | 2149 | T | C | 23  | 18  | --        | --   |
| CakTC32830 | Ca(ICC2/PI489777)SNP_09221 | 119  | C | G | 7   | 14  | --        | --   |
|            | Ca(ICC2/PI489777)SNP_09222 | 463  | G | T | 10  | 9   | --        | --   |
|            | Ca(ICC2/PI489777)SNP_09223 | 684  | C | A | 16  | 3   | --        | --   |
|            | Ca(ICC2/PI489777)SNP_09224 | 804  | C | T | 16  | 3   | --        | --   |
|            | Ca(ICC2/PI489777)SNP_09225 | 1380 | G | A | 19  | 9   | --        | --   |
|            | Ca(ICC2/PI489777)SNP_09226 | 1440 | A | T | 20  | 7   | --        | --   |
|            | Ca(ICC2/PI489777)SNP_09227 | 1441 | A | C | 20  | 7   | --        | --   |
|            | Ca(ICC2/PI489777)SNP_09228 | 1646 | A | C | 22  | 7   | --        | --   |
|            | Ca(ICC2/PI489777)SNP_09229 | 1716 | T | C | 20  | 5   | --        | --   |
|            | Ca(ICC2/PI489777)SNP_09230 | 1835 | A | G | 13  | 5   | --        | --   |
|            | Ca(ICC2/PI489777)SNP_09231 | 1845 | A | G | 12  | 5   | --        | --   |
|            | Ca(ICC2/PI489777)SNP_09232 | 2429 | T | C | 17  | 6   | --        | --   |
| CakTC27164 | Ca(ICC2/PI489777)SNP_09233 | 722  | C | T | 18  | 12  | --        | --   |
| CakTC28885 | Ca(ICC2/PI489777)SNP_09234 | 345  | G | A | 17  | 8   | --        | --   |
| CakTC39977 | Ca(ICC2/PI489777)SNP_09235 | 563  | A | G | 13  | 5   | --        | --   |
|            | Ca(ICC2/PI489777)SNP_09236 | 1425 | G | C | 6   | 4   | --        | --   |
| CakTC26224 | Ca(ICC2/PI489777)SNP_09237 | 358  | T | C | 10  | 8   | --        | --   |
|            | Ca(ICC2/PI489777)SNP_09238 | 705  | T | C | 13  | 6   | --        | --   |
|            | Ca(ICC2/PI489777)SNP_09239 | 1008 | A | C | 10  | 5   | --        | --   |
|            | Ca(ICC2/PI489777)SNP_09240 | 1276 | C | G | 11  | 4   | --        | --   |
|            | Ca(ICC2/PI489777)SNP_09241 | 1282 | C | G | 11  | 4   | --        | --   |
| CakTC39960 | Ca(ICC2/PI489777)SNP_09242 | 667  | G | A | 6   | 6   | --        | --   |
| CakTC36216 | Ca(ICC2/PI489777)SNP_09243 | 671  | A | G | 12  | 7   | --        | --   |
| CakTC28199 | Ca(ICC2/PI489777)SNP_09244 | 487  | T | C | 33  | 5   | --        | NAC  |
|            | Ca(ICC2/PI489777)SNP_09245 | 907  | G | A | 17  | 4   | --        | NAC  |

|            |                            |      |   |   |    |    |      |       |
|------------|----------------------------|------|---|---|----|----|------|-------|
| CakTC42005 | Ca(ICC2/P1489777)SNP_09246 | 125  | A | G | 32 | 18 | --   | --    |
|            | Ca(ICC2/P1489777)SNP_09247 | 495  | T | C | 60 | 29 | --   | --    |
|            | Ca(ICC2/P1489777)SNP_09248 | 853  | C | T | 48 | 26 | --   | --    |
| CakTC29962 | Ca(ICC2/P1489777)SNP_09249 | 288  | G | C | 25 | 26 | --   | --    |
|            | Ca(ICC2/P1489777)SNP_09250 | 816  | C | T | 23 | 18 | --   | --    |
|            | Ca(ICC2/P1489777)SNP_09251 | 1593 | T | A | 18 | 20 | --   | --    |
|            | Ca(ICC2/P1489777)SNP_09252 | 2028 | C | T | 27 | 27 | --   | --    |
|            | Ca(ICC2/P1489777)SNP_09253 | 2172 | T | A | 24 | 23 | --   | --    |
|            | Ca(ICC2/P1489777)SNP_09254 | 4344 | T | C | 21 | 13 | --   | --    |
|            | Ca(ICC2/P1489777)SNP_09255 | 5025 | A | C | 16 | 17 | --   | --    |
|            | Ca(ICC2/P1489777)SNP_09256 | 5644 | G | C | 3  | 6  | --   | --    |
| CakTC11911 | Ca(ICC2/P1489777)SNP_09257 | 386  | C | G | 29 | 20 | --   | --    |
|            | Ca(ICC2/P1489777)SNP_09258 | 482  | C | T | 27 | 21 | --   | --    |
| CakTC11486 | Ca(ICC2/P1489777)SNP_09259 | 162  | A | C | 11 | 3  | --   | --    |
|            | Ca(ICC2/P1489777)SNP_09260 | 287  | A | G | 15 | 6  | --   | --    |
|            | Ca(ICC2/P1489777)SNP_09261 | 439  | G | T | 20 | 10 | --   | --    |
|            | Ca(ICC2/P1489777)SNP_09262 | 777  | C | G | 17 | 13 | --   | --    |
|            | Ca(ICC2/P1489777)SNP_09263 | 1194 | A | T | 31 | 13 | --   | --    |
| CakTC01502 | Ca(ICC2/P1489777)SNP_09264 | 635  | C | T | 3  | 4  | --   | --    |
| CakTC37965 | Ca(ICC2/P1489777)SNP_09265 | 120  | A | G | 25 | 14 | --   | --    |
|            | Ca(ICC2/P1489777)SNP_09266 | 187  | C | T | 30 | 23 | --   | --    |
|            | Ca(ICC2/P1489777)SNP_09267 | 330  | C | A | 42 | 39 | --   | --    |
|            | Ca(ICC2/P1489777)SNP_09268 | 648  | G | C | 55 | 26 | --   | --    |
|            | Ca(ICC2/P1489777)SNP_09269 | 651  | T | G | 56 | 28 | --   | --    |
|            | Ca(ICC2/P1489777)SNP_09270 | 723  | G | A | 58 | 24 | --   | --    |
|            | Ca(ICC2/P1489777)SNP_09271 | 732  | A | T | 60 | 26 | --   | --    |
|            | Ca(ICC2/P1489777)SNP_09272 | 786  | C | T | 48 | 24 | --   | --    |
|            | Ca(ICC2/P1489777)SNP_09273 | 1020 | G | A | 15 | 13 | --   | --    |
| CakTC07047 | Ca(ICC2/P1489777)SNP_09274 | 462  | C | T | 3  | 8  | --   | --    |
| CakTC29457 | Ca(ICC2/P1489777)SNP_09275 | 656  | G | A | 3  | 3  | --   | --    |
|            | Ca(ICC2/P1489777)SNP_09276 | 857  | T | C | 7  | 7  | --   | --    |
|            | Ca(ICC2/P1489777)SNP_09277 | 1124 | G | C | 19 | 10 | --   | --    |
|            | Ca(ICC2/P1489777)SNP_09278 | 1238 | C | T | 16 | 9  | --   | --    |
|            | Ca(ICC2/P1489777)SNP_09279 | 1268 | C | T | 16 | 4  | --   | --    |
| CakTC16480 | Ca(ICC2/P1489777)SNP_09280 | 2239 | C | T | 21 | 11 | Root | --    |
|            | Ca(ICC2/P1489777)SNP_09281 | 2806 | G | A | 20 | 14 | Root | --    |
|            | Ca(ICC2/P1489777)SNP_09282 | 3201 | A | G | 13 | 9  | Root | --    |
|            | Ca(ICC2/P1489777)SNP_09283 | 4175 | C | T | 7  | 11 | Root | --    |
|            | Ca(ICC2/P1489777)SNP_09284 | 4217 | C | T | 8  | 11 | Root | --    |
|            | Ca(ICC2/P1489777)SNP_09285 | 4440 | C | A | 12 | 7  | Root | --    |
| CakTC16487 | Ca(ICC2/P1489777)SNP_09286 | 3651 | T | C | 77 | 60 | --   | CCAAT |
|            | Ca(ICC2/P1489777)SNP_09287 | 3750 | A | G | 75 | 67 | --   | CCAAT |
|            | Ca(ICC2/P1489777)SNP_09288 | 3762 | A | C | 79 | 68 | --   | CCAAT |
|            | Ca(ICC2/P1489777)SNP_09289 | 3846 | G | T | 74 | 53 | --   | CCAAT |
|            | Ca(ICC2/P1489777)SNP_09290 | 4020 | G | A | 15 | 11 | --   | CCAAT |
|            | Ca(ICC2/P1489777)SNP_09291 | 4084 | A | G | 7  | 13 | --   | CCAAT |
| CakTC09258 | Ca(ICC2/P1489777)SNP_09292 | 564  | G | A | 45 | 34 | --   | --    |
| CakTC26866 | Ca(ICC2/P1489777)SNP_09293 | 275  | T | A | 24 | 19 | --   | --    |
| CakTC13830 | Ca(ICC2/P1489777)SNP_09294 | 693  | G | A | 3  | 8  | --   | --    |
|            | Ca(ICC2/P1489777)SNP_09295 | 1232 | T | C | 4  | 8  | --   | --    |
| CakTC38011 | Ca(ICC2/P1489777)SNP_09296 | 400  | C | G | 6  | 6  | --   | --    |
|            | Ca(ICC2/P1489777)SNP_09297 | 532  | A | G | 10 | 13 | --   | --    |
| CakTC42330 | Ca(ICC2/P1489777)SNP_09298 | 270  | C | T | 12 | 4  | --   | --    |
|            | Ca(ICC2/P1489777)SNP_09299 | 560  | C | G | 21 | 7  | --   | --    |
|            | Ca(ICC2/P1489777)SNP_09300 | 618  | T | A | 19 | 6  | --   | --    |
|            | Ca(ICC2/P1489777)SNP_09301 | 1002 | C | T | 14 | 8  | --   | --    |
|            | Ca(ICC2/P1489777)SNP_09302 | 1006 | T | C | 13 | 8  | --   | --    |
| CakTC37240 | Ca(ICC2/P1489777)SNP_09303 | 1561 | G | A | 42 | 33 | --   | --    |
| CakTC31355 | Ca(ICC2/P1489777)SNP_09304 | 527  | A | C | 6  | 4  | --   | --    |
| CakTC32932 | Ca(ICC2/P1489777)SNP_09305 | 618  | T | C | 5  | 4  | --   | --    |
|            | Ca(ICC2/P1489777)SNP_09306 | 654  | A | C | 6  | 3  | --   | --    |
|            | Ca(ICC2/P1489777)SNP_09307 | 1015 | C | A | 7  | 5  | --   | --    |
|            | Ca(ICC2/P1489777)SNP_09308 | 1254 | C | T | 7  | 4  | --   | --    |
| CakTC42566 | Ca(ICC2/P1489777)SNP_09309 | 656  | T | C | 24 | 27 | --   | --    |
| CakTC26019 | Ca(ICC2/P1489777)SNP_09310 | 295  | A | G | 26 | 13 | --   | HSF   |
|            | Ca(ICC2/P1489777)SNP_09311 | 401  | T | C | 32 | 16 | --   | HSF   |
|            | Ca(ICC2/P1489777)SNP_09312 | 466  | A | T | 30 | 16 | --   | HSF   |
|            | Ca(ICC2/P1489777)SNP_09313 | 545  | A | G | 32 | 17 | --   | HSF   |
|            | Ca(ICC2/P1489777)SNP_09314 | 1135 | C | G | 26 | 13 | --   | HSF   |
|            | Ca(ICC2/P1489777)SNP_09315 | 1344 | C | T | 24 | 3  | --   | HSF   |
|            | Ca(ICC2/P1489777)SNP_09316 | 1568 | T | C | 19 | 15 | --   | HSF   |
|            | Ca(ICC2/P1489777)SNP_09317 | 1571 | T | A | 20 | 14 | --   | HSF   |
|            | Ca(ICC2/P1489777)SNP_09318 | 1662 | T | C | 17 | 13 | --   | HSF   |
| CakTC28195 | Ca(ICC2/P1489777)SNP_09319 | 176  | C | T | 41 | 20 | --   | --    |

|            |                             |      |   |   |    |    |       |            |
|------------|-----------------------------|------|---|---|----|----|-------|------------|
|            | Ca(ICCV2/PI489777)SNP_09320 | 1638 | C | T | 56 | 20 | --    | --         |
| CakTC25120 | Ca(ICCV2/PI489777)SNP_09321 | 619  | C | A | 27 | 35 | --    | --         |
| CakTC37467 | Ca(ICCV2/PI489777)SNP_09322 | 1272 | C | T | 23 | 27 | --    | --         |
| CakTC38277 | Ca(ICCV2/PI489777)SNP_09323 | 165  | T | A | 25 | 11 | --    | --         |
|            | Ca(ICCV2/PI489777)SNP_09324 | 684  | A | G | 59 | 26 | --    | --         |
|            | Ca(ICCV2/PI489777)SNP_09325 | 923  | A | G | 36 | 20 | --    | --         |
|            | Ca(ICCV2/PI489777)SNP_09326 | 933  | G | C | 35 | 18 | --    | --         |
| CakTC30079 | Ca(ICCV2/PI489777)SNP_09327 | 123  | G | A | 4  | 5  | --    | --         |
|            | Ca(ICCV2/PI489777)SNP_09328 | 250  | G | A | 9  | 5  | --    | --         |
| CakTC24845 | Ca(ICCV2/PI489777)SNP_09329 | 405  | G | A | 20 | 4  | --    | --         |
|            | Ca(ICCV2/PI489777)SNP_09330 | 579  | A | G | 18 | 8  | --    | --         |
|            | Ca(ICCV2/PI489777)SNP_09331 | 1080 | T | C | 26 | 5  | --    | --         |
|            | Ca(ICCV2/PI489777)SNP_09332 | 1135 | T | A | 28 | 7  | --    | --         |
|            | Ca(ICCV2/PI489777)SNP_09333 | 1155 | C | T | 27 | 6  | --    | --         |
| CakTC28795 | Ca(ICCV2/PI489777)SNP_09334 | 292  | C | T | 16 | 25 | --    | --         |
|            | Ca(ICCV2/PI489777)SNP_09335 | 356  | C | T | 24 | 27 | --    | --         |
|            | Ca(ICCV2/PI489777)SNP_09336 | 1447 | C | T | 19 | 28 | --    | --         |
| CakTC39714 | Ca(ICCV2/PI489777)SNP_09337 | 1160 | A | G | 13 | 5  | --    | --         |
| CakTC31033 | Ca(ICCV2/PI489777)SNP_09338 | 782  | T | C | 3  | 8  | --    | --         |
|            | Ca(ICCV2/PI489777)SNP_09339 | 790  | A | C | 3  | 8  | --    | --         |
| CakTC06493 | Ca(ICCV2/PI489777)SNP_09340 | 131  | T | G | 6  | 5  | --    | --         |
| CakTC26804 | Ca(ICCV2/PI489777)SNP_09341 | 226  | C | A | 3  | 4  | --    | --         |
|            | Ca(ICCV2/PI489777)SNP_09342 | 258  | T | G | 3  | 3  | --    | --         |
|            | Ca(ICCV2/PI489777)SNP_09343 | 930  | A | G | 6  | 7  | --    | --         |
|            | Ca(ICCV2/PI489777)SNP_09344 | 2517 | C | T | 7  | 3  | --    | --         |
|            | Ca(ICCV2/PI489777)SNP_09345 | 2538 | G | A | 7  | 3  | --    | --         |
| CakTC29870 | Ca(ICCV2/PI489777)SNP_09346 | 1189 | A | G | 13 | 7  | Shoot | Alfin-like |
|            | Ca(ICCV2/PI489777)SNP_09347 | 1265 | T | G | 10 | 7  | Shoot | Alfin-like |
|            | Ca(ICCV2/PI489777)SNP_09348 | 1540 | G | T | 21 | 4  | Shoot | Alfin-like |
|            | Ca(ICCV2/PI489777)SNP_09349 | 1592 | T | C | 20 | 4  | Shoot | Alfin-like |
|            | Ca(ICCV2/PI489777)SNP_09350 | 1629 | G | A | 16 | 3  | Shoot | Alfin-like |
| CakTC42148 | Ca(ICCV2/PI489777)SNP_09351 | 202  | C | T | 4  | 4  | --    | --         |
|            | Ca(ICCV2/PI489777)SNP_09352 | 889  | C | T | 6  | 8  | --    | --         |
| CakTC41901 | Ca(ICCV2/PI489777)SNP_09353 | 658  | A | T | 10 | 3  | --    | --         |
| CakTC37460 | Ca(ICCV2/PI489777)SNP_09354 | 145  | T | C | 18 | 5  | --    | --         |
| CakTC37210 | Ca(ICCV2/PI489777)SNP_09355 | 54   | A | C | 9  | 4  | --    | --         |
|            | Ca(ICCV2/PI489777)SNP_09356 | 251  | C | T | 9  | 3  | --    | --         |
| CakTC22315 | Ca(ICCV2/PI489777)SNP_09357 | 140  | G | T | 3  | 6  | --    | --         |
|            | Ca(ICCV2/PI489777)SNP_09358 | 566  | C | T | 5  | 3  | --    | --         |
|            | Ca(ICCV2/PI489777)SNP_09359 | 2703 | A | C | 21 | 19 | --    | --         |
|            | Ca(ICCV2/PI489777)SNP_09360 | 3096 | A | T | 4  | 4  | --    | --         |
| CakTC33803 | Ca(ICCV2/PI489777)SNP_09361 | 237  | A | C | 51 | 11 | --    | --         |
|            | Ca(ICCV2/PI489777)SNP_09362 | 503  | G | A | 37 | 3  | --    | --         |
|            | Ca(ICCV2/PI489777)SNP_09363 | 642  | A | G | 13 | 11 | --    | --         |
| CakTC37884 | Ca(ICCV2/PI489777)SNP_09364 | 1261 | T | A | 10 | 7  | --    | --         |
|            | Ca(ICCV2/PI489777)SNP_09365 | 1297 | A | G | 8  | 7  | --    | --         |
| CakTC39058 | Ca(ICCV2/PI489777)SNP_09366 | 679  | G | A | 18 | 7  | --    | --         |
|            | Ca(ICCV2/PI489777)SNP_09367 | 1490 | T | C | 4  | 3  | --    | --         |
|            | Ca(ICCV2/PI489777)SNP_09368 | 1492 | C | T | 4  | 3  | --    | --         |
| CakTC40617 | Ca(ICCV2/PI489777)SNP_09369 | 271  | A | G | 6  | 3  | --    | --         |
|            | Ca(ICCV2/PI489777)SNP_09370 | 1263 | T | A | 5  | 6  | --    | --         |
|            | Ca(ICCV2/PI489777)SNP_09371 | 1722 | C | T | 3  | 3  | --    | --         |
| CakTC08718 | Ca(ICCV2/PI489777)SNP_09372 | 176  | T | A | 10 | 4  | --    | --         |
|            | Ca(ICCV2/PI489777)SNP_09373 | 210  | A | G | 7  | 4  | --    | --         |
|            | Ca(ICCV2/PI489777)SNP_09374 | 370  | C | G | 14 | 7  | --    | --         |
|            | Ca(ICCV2/PI489777)SNP_09375 | 587  | T | C | 17 | 4  | --    | --         |
| CakTC10409 | Ca(ICCV2/PI489777)SNP_09376 | 215  | G | A | 3  | 3  | --    | --         |
|            | Ca(ICCV2/PI489777)SNP_09377 | 295  | C | T | 4  | 3  | --    | --         |
|            | Ca(ICCV2/PI489777)SNP_09378 | 301  | T | A | 4  | 3  | --    | --         |
| CakTC33007 | Ca(ICCV2/PI489777)SNP_09379 | 298  | T | C | 41 | 13 | --    | --         |
|            | Ca(ICCV2/PI489777)SNP_09380 | 385  | G | C | 43 | 15 | --    | --         |
|            | Ca(ICCV2/PI489777)SNP_09381 | 407  | G | C | 41 | 14 | --    | --         |
|            | Ca(ICCV2/PI489777)SNP_09382 | 1279 | T | C | 18 | 7  | --    | --         |
|            | Ca(ICCV2/PI489777)SNP_09383 | 1564 | T | C | 27 | 19 | --    | --         |
|            | Ca(ICCV2/PI489777)SNP_09384 | 1570 | C | T | 26 | 20 | --    | --         |
|            | Ca(ICCV2/PI489777)SNP_09385 | 1780 | T | C | 34 | 16 | --    | --         |
|            | Ca(ICCV2/PI489777)SNP_09386 | 2032 | C | T | 37 | 16 | --    | --         |
|            | Ca(ICCV2/PI489777)SNP_09387 | 2440 | T | C | 44 | 21 | --    | --         |
| CakTC26909 | Ca(ICCV2/PI489777)SNP_09388 | 1166 | C | T | 21 | 7  | --    | --         |
|            | Ca(ICCV2/PI489777)SNP_09389 | 1184 | G | A | 17 | 6  | --    | --         |
|            | Ca(ICCV2/PI489777)SNP_09390 | 1226 | G | A | 13 | 6  | --    | --         |
|            | Ca(ICCV2/PI489777)SNP_09391 | 1276 | A | T | 24 | 6  | --    | --         |
|            | Ca(ICCV2/PI489777)SNP_09392 | 1333 | A | C | 31 | 7  | --    | --         |
|            | Ca(ICCV2/PI489777)SNP_09393 | 1469 | C | T | 23 | 7  | --    | --         |

|            |                            |      |   |   |    |    |      |       |
|------------|----------------------------|------|---|---|----|----|------|-------|
|            | Ca(ICC2/PI489777)SNP_09394 | 1487 | C | T | 23 | 8  | --   | --    |
|            | Ca(ICC2/PI489777)SNP_09395 | 1489 | C | T | 23 | 8  | --   | --    |
|            | Ca(ICC2/PI489777)SNP_09396 | 1697 | T | A | 12 | 11 | --   | --    |
|            | Ca(ICC2/PI489777)SNP_09397 | 1706 | A | G | 12 | 11 | --   | --    |
|            | Ca(ICC2/PI489777)SNP_09398 | 1805 | G | C | 11 | 12 | --   | --    |
|            | Ca(ICC2/PI489777)SNP_09399 | 1857 | C | G | 8  | 13 | --   | --    |
|            | Ca(ICC2/PI489777)SNP_09400 | 2355 | G | A | 13 | 9  | --   | --    |
|            | Ca(ICC2/PI489777)SNP_09401 | 2384 | G | A | 16 | 7  | --   | --    |
|            | Ca(ICC2/PI489777)SNP_09402 | 2677 | G | C | 21 | 6  | --   | --    |
|            | Ca(ICC2/PI489777)SNP_09403 | 3131 | C | A | 5  | 5  | --   | --    |
|            | Ca(ICC2/PI489777)SNP_09404 | 3320 | G | A | 20 | 14 | --   | --    |
|            | Ca(ICC2/PI489777)SNP_09405 | 3527 | C | T | 16 | 18 | --   | --    |
|            | Ca(ICC2/PI489777)SNP_09406 | 4991 | A | G | 8  | 5  | --   | --    |
|            | Ca(ICC2/PI489777)SNP_09407 | 5186 | G | A | 8  | 5  | --   | --    |
|            | Ca(ICC2/PI489777)SNP_09408 | 5336 | G | T | 13 | 3  | --   | --    |
| CakTC37142 | Ca(ICC2/PI489777)SNP_09409 | 71   | C | T | 4  | 5  | --   | --    |
| CakTC40763 | Ca(ICC2/PI489777)SNP_09410 | 1036 | C | A | 7  | 8  | --   | --    |
| CakTC38033 | Ca(ICC2/PI489777)SNP_09411 | 517  | C | A | 64 | 49 | --   | --    |
|            | Ca(ICC2/PI489777)SNP_09412 | 1683 | A | G | 7  | 12 | --   | --    |
|            | Ca(ICC2/PI489777)SNP_09413 | 1695 | C | T | 9  | 12 | --   | --    |
| CakTC08337 | Ca(ICC2/PI489777)SNP_09414 | 1504 | G | A | 7  | 8  | --   | --    |
|            | Ca(ICC2/PI489777)SNP_09415 | 1524 | G | A | 5  | 8  | --   | --    |
|            | Ca(ICC2/PI489777)SNP_09416 | 1568 | G | C | 4  | 7  | --   | --    |
| CakTC37433 | Ca(ICC2/PI489777)SNP_09417 | 168  | C | A | 11 | 9  | --   | --    |
|            | Ca(ICC2/PI489777)SNP_09418 | 260  | A | G | 11 | 10 | --   | --    |
|            | Ca(ICC2/PI489777)SNP_09419 | 276  | G | A | 13 | 10 | --   | --    |
|            | Ca(ICC2/PI489777)SNP_09420 | 317  | C | T | 13 | 9  | --   | --    |
|            | Ca(ICC2/PI489777)SNP_09421 | 367  | A | G | 12 | 13 | --   | --    |
|            | Ca(ICC2/PI489777)SNP_09422 | 871  | T | C | 20 | 11 | --   | --    |
| CakTC08559 | Ca(ICC2/PI489777)SNP_09423 | 21   | G | C | 3  | 3  | --   | PHD   |
|            | Ca(ICC2/PI489777)SNP_09424 | 31   | A | T | 4  | 4  | --   | PHD   |
|            | Ca(ICC2/PI489777)SNP_09425 | 85   | A | C | 6  | 6  | --   | PHD   |
| CakTC26605 | Ca(ICC2/PI489777)SNP_09426 | 116  | C | A | 7  | 3  | --   | --    |
|            | Ca(ICC2/PI489777)SNP_09427 | 925  | G | A | 9  | 14 | --   | --    |
| CakTC42463 | Ca(ICC2/PI489777)SNP_09428 | 839  | A | G | 5  | 9  | --   | --    |
| CakTC13108 | Ca(ICC2/PI489777)SNP_09429 | 1003 | C | T | 8  | 5  | --   | EIL   |
| CakTC27761 | Ca(ICC2/PI489777)SNP_09430 | 286  | A | G | 5  | 9  | --   | --    |
|            | Ca(ICC2/PI489777)SNP_09431 | 359  | C | T | 6  | 9  | --   | --    |
| CakTC23469 | Ca(ICC2/PI489777)SNP_09432 | 269  | C | T | 4  | 7  | --   | mTERF |
|            | Ca(ICC2/PI489777)SNP_09433 | 1042 | C | G | 9  | 7  | --   | mTERF |
|            | Ca(ICC2/PI489777)SNP_09434 | 1848 | A | G | 10 | 10 | --   | mTERF |
| CakTC41841 | Ca(ICC2/PI489777)SNP_09435 | 49   | T | G | 29 | 8  | --   | CCAAT |
| CakTC41212 | Ca(ICC2/PI489777)SNP_09436 | 581  | G | A | 5  | 6  | --   | --    |
|            | Ca(ICC2/PI489777)SNP_09437 | 611  | T | G | 5  | 6  | --   | --    |
|            | Ca(ICC2/PI489777)SNP_09438 | 649  | C | T | 4  | 6  | --   | --    |
| CakTC36079 | Ca(ICC2/PI489777)SNP_09439 | 330  | C | G | 7  | 5  | --   | --    |
|            | Ca(ICC2/PI489777)SNP_09440 | 476  | C | G | 13 | 11 | --   | --    |
|            | Ca(ICC2/PI489777)SNP_09441 | 594  | A | G | 18 | 10 | --   | --    |
|            | Ca(ICC2/PI489777)SNP_09442 | 2057 | T | C | 3  | 10 | --   | --    |
| CakTC29331 | Ca(ICC2/PI489777)SNP_09443 | 1110 | G | A | 28 | 7  | --   | --    |
|            | Ca(ICC2/PI489777)SNP_09444 | 1761 | G | C | 9  | 3  | --   | --    |
|            | Ca(ICC2/PI489777)SNP_09445 | 1827 | C | G | 7  | 3  | --   | --    |
| CakTC34091 | Ca(ICC2/PI489777)SNP_09446 | 257  | C | G | 16 | 6  | --   | --    |
|            | Ca(ICC2/PI489777)SNP_09447 | 492  | C | A | 7  | 3  | --   | --    |
| CakTC39025 | Ca(ICC2/PI489777)SNP_09448 | 1168 | A | C | 24 | 8  | --   | --    |
| CakTC37949 | Ca(ICC2/PI489777)SNP_09449 | 212  | T | C | 27 | 20 | --   | --    |
| CakTC29609 | Ca(ICC2/PI489777)SNP_09450 | 1350 | A | G | 3  | 3  | Root | --    |
| CakTC38834 | Ca(ICC2/PI489777)SNP_09451 | 1156 | A | T | 9  | 5  | --   | --    |
|            | Ca(ICC2/PI489777)SNP_09452 | 1207 | T | C | 9  | 8  | --   | --    |
| CakTC02320 | Ca(ICC2/PI489777)SNP_09453 | 390  | A | C | 7  | 3  | --   | --    |
| CakTC29774 | Ca(ICC2/PI489777)SNP_09454 | 1124 | G | C | 4  | 3  | --   | --    |
|            | Ca(ICC2/PI489777)SNP_09455 | 1131 | A | T | 4  | 3  | --   | --    |
|            | Ca(ICC2/PI489777)SNP_09456 | 1230 | C | T | 4  | 5  | --   | --    |
|            | Ca(ICC2/PI489777)SNP_09457 | 1876 | G | C | 4  | 4  | --   | --    |
| CakTC31078 | Ca(ICC2/PI489777)SNP_09458 | 1739 | G | T | 7  | 10 | --   | --    |
|            | Ca(ICC2/PI489777)SNP_09459 | 2617 | C | G | 18 | 13 | --   | --    |
|            | Ca(ICC2/PI489777)SNP_09460 | 2752 | G | A | 19 | 9  | --   | --    |
|            | Ca(ICC2/PI489777)SNP_09461 | 2822 | G | A | 15 | 8  | --   | --    |
|            | Ca(ICC2/PI489777)SNP_09462 | 2977 | G | T | 14 | 13 | --   | --    |
|            | Ca(ICC2/PI489777)SNP_09463 | 3298 | G | A | 26 | 10 | --   | --    |
|            | Ca(ICC2/PI489777)SNP_09464 | 3496 | T | C | 10 | 12 | --   | --    |
| CakTC31666 | Ca(ICC2/PI489777)SNP_09465 | 1817 | G | A | 3  | 3  | --   | --    |
|            | Ca(ICC2/PI489777)SNP_09466 | 1898 | A | G | 3  | 3  | --   | --    |
| CakTC33215 | Ca(ICC2/PI489777)SNP_09467 | 555  | T | C | 3  | 4  | --   | --    |



|            |                            |       |   |   |    |    |           |            |
|------------|----------------------------|-------|---|---|----|----|-----------|------------|
|            | Ca(ICC2/PI489777)SNP_09468 | 5529  | A | G | 4  | 3  | --        | --         |
|            | Ca(ICC2/PI489777)SNP_09469 | 5586  | T | C | 4  | 3  | --        | --         |
|            | Ca(ICC2/PI489777)SNP_09470 | 7332  | A | T | 4  | 4  | --        | --         |
|            | Ca(ICC2/PI489777)SNP_09471 | 13368 | G | T | 4  | 7  | --        | --         |
|            | Ca(ICC2/PI489777)SNP_09472 | 13579 | G | A | 5  | 5  | --        | --         |
| CakTC23902 | Ca(ICC2/PI489777)SNP_09473 | 491   | A | T | 28 | 4  | --        | --         |
|            | Ca(ICC2/PI489777)SNP_09474 | 590   | G | A | 19 | 4  | --        | --         |
|            | Ca(ICC2/PI489777)SNP_09475 | 602   | A | T | 24 | 4  | --        | --         |
|            | Ca(ICC2/PI489777)SNP_09476 | 670   | T | C | 30 | 6  | --        | --         |
|            | Ca(ICC2/PI489777)SNP_09477 | 671   | T | C | 30 | 6  | --        | --         |
|            | Ca(ICC2/PI489777)SNP_09478 | 680   | C | T | 30 | 6  | --        | --         |
|            | Ca(ICC2/PI489777)SNP_09479 | 700   | C | T | 29 | 5  | --        | --         |
|            | Ca(ICC2/PI489777)SNP_09480 | 716   | G | T | 29 | 6  | --        | --         |
|            | Ca(ICC2/PI489777)SNP_09481 | 1385  | G | A | 10 | 3  | --        | --         |
|            | Ca(ICC2/PI489777)SNP_09482 | 1388  | A | T | 9  | 3  | --        | --         |
|            | Ca(ICC2/PI489777)SNP_09483 | 1757  | G | T | 11 | 3  | --        | --         |
|            | Ca(ICC2/PI489777)SNP_09484 | 1952  | A | G | 9  | 4  | --        | --         |
|            | Ca(ICC2/PI489777)SNP_09485 | 2024  | T | C | 9  | 6  | --        | --         |
|            | Ca(ICC2/PI489777)SNP_09486 | 2033  | G | A | 10 | 6  | --        | --         |
|            | Ca(ICC2/PI489777)SNP_09487 | 2186  | A | G | 10 | 5  | --        | --         |
|            | Ca(ICC2/PI489777)SNP_09488 | 2226  | C | T | 8  | 5  | --        | --         |
|            | Ca(ICC2/PI489777)SNP_09489 | 2258  | T | G | 9  | 5  | --        | --         |
|            | Ca(ICC2/PI489777)SNP_09490 | 2345  | G | A | 7  | 4  | --        | --         |
| CakTC41726 | Ca(ICC2/PI489777)SNP_09491 | 179   | A | G | 5  | 4  | Young_pod | --         |
|            | Ca(ICC2/PI489777)SNP_09492 | 394   | G | C | 7  | 7  | Young_pod | --         |
|            | Ca(ICC2/PI489777)SNP_09493 | 437   | T | C | 10 | 4  | Young_pod | --         |
|            | Ca(ICC2/PI489777)SNP_09494 | 841   | G | A | 17 | 8  | Young_pod | --         |
|            | Ca(ICC2/PI489777)SNP_09495 | 878   | G | A | 18 | 7  | Young_pod | --         |
|            | Ca(ICC2/PI489777)SNP_09496 | 911   | C | T | 19 | 9  | Young_pod | --         |
|            | Ca(ICC2/PI489777)SNP_09497 | 923   | G | A | 22 | 9  | Young_pod | --         |
|            | Ca(ICC2/PI489777)SNP_09498 | 935   | C | T | 21 | 10 | Young_pod | --         |
| CakTC12121 | Ca(ICC2/PI489777)SNP_09499 | 427   | A | T | 17 | 15 | --        | --         |
|            | Ca(ICC2/PI489777)SNP_09500 | 538   | A | G | 23 | 9  | --        | --         |
| CakTC35745 | Ca(ICC2/PI489777)SNP_09501 | 1076  | A | T | 12 | 3  | --        | Alfin-like |
|            | Ca(ICC2/PI489777)SNP_09502 | 1170  | G | A | 12 | 3  | --        | Alfin-like |
|            | Ca(ICC2/PI489777)SNP_09503 | 1742  | A | G | 4  | 4  | --        | Alfin-like |
|            | Ca(ICC2/PI489777)SNP_09504 | 2834  | G | T | 11 | 5  | --        | Alfin-like |
|            | Ca(ICC2/PI489777)SNP_09505 | 3017  | T | A | 11 | 9  | --        | Alfin-like |
| CakTC42729 | Ca(ICC2/PI489777)SNP_09506 | 1406  | C | A | 11 | 5  | --        | --         |
| CakTC33019 | Ca(ICC2/PI489777)SNP_09507 | 715   | T | A | 7  | 4  | --        | --         |
|            | Ca(ICC2/PI489777)SNP_09508 | 1882  | G | A | 15 | 9  | --        | --         |
|            | Ca(ICC2/PI489777)SNP_09509 | 2107  | C | T | 17 | 6  | --        | --         |
|            | Ca(ICC2/PI489777)SNP_09510 | 2488  | A | C | 7  | 5  | --        | --         |
| CakTC28233 | Ca(ICC2/PI489777)SNP_09511 | 86    | C | G | 9  | 5  | --        | --         |
|            | Ca(ICC2/PI489777)SNP_09512 | 135   | T | A | 12 | 7  | --        | --         |
|            | Ca(ICC2/PI489777)SNP_09513 | 196   | G | T | 13 | 8  | --        | --         |
|            | Ca(ICC2/PI489777)SNP_09514 | 360   | G | A | 16 | 12 | --        | --         |
|            | Ca(ICC2/PI489777)SNP_09515 | 723   | G | A | 27 | 7  | --        | --         |
|            | Ca(ICC2/PI489777)SNP_09516 | 747   | T | C | 26 | 6  | --        | --         |
|            | Ca(ICC2/PI489777)SNP_09517 | 948   | T | C | 27 | 4  | --        | --         |
| CakTC38994 | Ca(ICC2/PI489777)SNP_09518 | 304   | A | C | 9  | 5  | --        | --         |
|            | Ca(ICC2/PI489777)SNP_09519 | 409   | C | T | 6  | 4  | --        | --         |
|            | Ca(ICC2/PI489777)SNP_09520 | 823   | G | A | 6  | 4  | --        | --         |
|            | Ca(ICC2/PI489777)SNP_09521 | 982   | G | A | 6  | 4  | --        | --         |
|            | Ca(ICC2/PI489777)SNP_09522 | 1060  | A | G | 5  | 3  | --        | --         |
|            | Ca(ICC2/PI489777)SNP_09523 | 1120  | C | T | 6  | 4  | --        | --         |
| CakTC30384 | Ca(ICC2/PI489777)SNP_09524 | 473   | A | G | 6  | 7  | --        | --         |
| CakTC28392 | Ca(ICC2/PI489777)SNP_09525 | 504   | T | G | 39 | 14 | --        | --         |
|            | Ca(ICC2/PI489777)SNP_09526 | 1116  | C | T | 41 | 21 | --        | --         |
|            | Ca(ICC2/PI489777)SNP_09527 | 1125  | T | C | 39 | 21 | --        | --         |
|            | Ca(ICC2/PI489777)SNP_09528 | 1283  | T | G | 39 | 15 | --        | --         |
|            | Ca(ICC2/PI489777)SNP_09529 | 1378  | A | T | 32 | 9  | --        | --         |
| CakTC42870 | Ca(ICC2/PI489777)SNP_09530 | 461   | C | T | 22 | 9  | Flower    | bud        |
|            | Ca(ICC2/PI489777)SNP_09531 | 513   | A | C | 21 | 12 | Flower    | bud        |
|            | Ca(ICC2/PI489777)SNP_09532 | 717   | G | A | 15 | 7  | Flower    | bud        |
|            | Ca(ICC2/PI489777)SNP_09533 | 786   | T | A | 13 | 5  | Flower    | bud        |
| CakTC24005 | Ca(ICC2/PI489777)SNP_09534 | 1396  | G | A | 11 | 9  | --        | --         |
|            | Ca(ICC2/PI489777)SNP_09535 | 1660  | T | C | 8  | 5  | --        | --         |
| CakTC11174 | Ca(ICC2/PI489777)SNP_09536 | 217   | C | T | 14 | 9  | --        | --         |
|            | Ca(ICC2/PI489777)SNP_09537 | 460   | G | A | 18 | 12 | --        | --         |
|            | Ca(ICC2/PI489777)SNP_09538 | 625   | A | G | 11 | 10 | --        | --         |
|            | Ca(ICC2/PI489777)SNP_09539 | 655   | A | G | 15 | 10 | --        | --         |
| CakTC26144 | Ca(ICC2/PI489777)SNP_09540 | 248   | T | C | 23 | 5  | --        | --         |
|            | Ca(ICC2/PI489777)SNP_09541 | 267   | A | C | 23 | 5  | --        | --         |

|            |                            |      |   |   |     |     |       |     |
|------------|----------------------------|------|---|---|-----|-----|-------|-----|
|            | Ca(ICC2/PI489777)SNP_09542 | 1194 | T | C | 22  | 3   | --    | --  |
|            | Ca(ICC2/PI489777)SNP_09543 | 1592 | C | T | 17  | 9   | --    | --  |
|            | Ca(ICC2/PI489777)SNP_09544 | 1779 | C | T | 12  | 10  | --    | --  |
|            | Ca(ICC2/PI489777)SNP_09545 | 1911 | A | G | 8   | 7   | --    | --  |
| CakTC25336 | Ca(ICC2/PI489777)SNP_09546 | 228  | G | T | 55  | 47  | --    | --  |
|            | Ca(ICC2/PI489777)SNP_09547 | 470  | T | G | 154 | 111 | --    | --  |
|            | Ca(ICC2/PI489777)SNP_09548 | 704  | T | A | 106 | 77  | --    | --  |
|            | Ca(ICC2/PI489777)SNP_09549 | 1646 | A | T | 91  | 58  | --    | --  |
| CakTC40781 | Ca(ICC2/PI489777)SNP_09550 | 348  | C | A | 10  | 6   | --    | --  |
| CakTC31701 | Ca(ICC2/PI489777)SNP_09551 | 967  | A | T | 6   | 3   | Shoot | --  |
| CakTC27533 | Ca(ICC2/PI489777)SNP_09552 | 2015 | G | T | 8   | 3   | --    | --  |
|            | Ca(ICC2/PI489777)SNP_09553 | 2094 | G | T | 6   | 4   | --    | --  |
| CakTC39456 | Ca(ICC2/PI489777)SNP_09554 | 1172 | G | A | 7   | 13  | --    | TPR |
|            | Ca(ICC2/PI489777)SNP_09555 | 1173 | C | T | 7   | 12  | --    | TPR |
|            | Ca(ICC2/PI489777)SNP_09556 | 1265 | G | T | 4   | 11  | --    | TPR |
| CakTC26068 | Ca(ICC2/PI489777)SNP_09557 | 329  | G | T | 56  | 52  | --    | --  |
| CakTC29086 | Ca(ICC2/PI489777)SNP_09558 | 33   | T | C | 6   | 6   | --    | --  |
|            | Ca(ICC2/PI489777)SNP_09559 | 261  | C | T | 30  | 12  | --    | --  |
|            | Ca(ICC2/PI489777)SNP_09560 | 864  | C | A | 22  | 10  | --    | --  |
| CakTC35711 | Ca(ICC2/PI489777)SNP_09561 | 715  | A | G | 50  | 32  | --    | --  |
|            | Ca(ICC2/PI489777)SNP_09562 | 1999 | C | T | 61  | 58  | --    | --  |
|            | Ca(ICC2/PI489777)SNP_09563 | 2593 | T | C | 60  | 48  | --    | --  |
|            | Ca(ICC2/PI489777)SNP_09564 | 3662 | A | G | 7   | 16  | --    | --  |
|            | Ca(ICC2/PI489777)SNP_09565 | 3684 | T | C | 5   | 11  | --    | --  |
| CakTC26324 | Ca(ICC2/PI489777)SNP_09566 | 851  | A | G | 21  | 5   | --    | --  |
|            | Ca(ICC2/PI489777)SNP_09567 | 908  | G | A | 17  | 5   | --    | --  |
|            | Ca(ICC2/PI489777)SNP_09568 | 1152 | T | C | 12  | 6   | --    | --  |
|            | Ca(ICC2/PI489777)SNP_09569 | 1371 | T | C | 13  | 8   | --    | --  |
| CakTC42098 | Ca(ICC2/PI489777)SNP_09570 | 761  | T | C | 11  | 3   | --    | --  |
|            | Ca(ICC2/PI489777)SNP_09571 | 1289 | T | C | 15  | 4   | --    | --  |
| CakTC27690 | Ca(ICC2/PI489777)SNP_09572 | 430  | T | G | 35  | 16  | --    | --  |
|            | Ca(ICC2/PI489777)SNP_09573 | 879  | G | A | 13  | 13  | --    | --  |
|            | Ca(ICC2/PI489777)SNP_09574 | 1007 | A | G | 12  | 11  | --    | --  |
|            | Ca(ICC2/PI489777)SNP_09575 | 1543 | G | A | 8   | 6   | --    | --  |
|            | Ca(ICC2/PI489777)SNP_09576 | 1618 | C | T | 9   | 5   | --    | --  |
| CakTC26944 | Ca(ICC2/PI489777)SNP_09577 | 1166 | T | A | 15  | 3   | --    | TCP |
|            | Ca(ICC2/PI489777)SNP_09578 | 1289 | G | A | 13  | 6   | --    | TCP |
|            | Ca(ICC2/PI489777)SNP_09579 | 1511 | G | A | 4   | 3   | --    | TCP |
|            | Ca(ICC2/PI489777)SNP_09580 | 1513 | C | T | 4   | 3   | --    | TCP |
| CakTC25384 | Ca(ICC2/PI489777)SNP_09581 | 228  | T | G | 15  | 3   | --    | --  |
| CakTC25751 | Ca(ICC2/PI489777)SNP_09582 | 1291 | T | C | 64  | 20  | --    | --  |
|            | Ca(ICC2/PI489777)SNP_09583 | 1330 | G | A | 60  | 18  | --    | --  |
|            | Ca(ICC2/PI489777)SNP_09584 | 1548 | A | T | 19  | 3   | --    | --  |
|            | Ca(ICC2/PI489777)SNP_09585 | 1549 | T | C | 19  | 3   | --    | --  |
|            | Ca(ICC2/PI489777)SNP_09586 | 1625 | G | A | 16  | 3   | --    | --  |
| CakTC37511 | Ca(ICC2/PI489777)SNP_09587 | 546  | C | A | 8   | 3   | --    | --  |
|            | Ca(ICC2/PI489777)SNP_09588 | 804  | C | T | 11  | 4   | --    | --  |
| CakTC28817 | Ca(ICC2/PI489777)SNP_09589 | 233  | A | G | 3   | 10  | --    | --  |
| CakTC42071 | Ca(ICC2/PI489777)SNP_09590 | 151  | A | C | 4   | 4   | --    | --  |
|            | Ca(ICC2/PI489777)SNP_09591 | 656  | G | A | 11  | 4   | --    | --  |
|            | Ca(ICC2/PI489777)SNP_09592 | 792  | G | C | 6   | 3   | --    | --  |
|            | Ca(ICC2/PI489777)SNP_09593 | 888  | C | T | 5   | 3   | --    | --  |
|            | Ca(ICC2/PI489777)SNP_09594 | 928  | C | T | 4   | 3   | --    | --  |
| CakTC26533 | Ca(ICC2/PI489777)SNP_09595 | 616  | C | T | 7   | 8   | --    | --  |
|            | Ca(ICC2/PI489777)SNP_09596 | 661  | C | T | 7   | 6   | --    | --  |
| CakTC32471 | Ca(ICC2/PI489777)SNP_09597 | 447  | T | C | 5   | 4   | --    | --  |
|            | Ca(ICC2/PI489777)SNP_09598 | 469  | C | A | 4   | 4   | --    | --  |
| CakTC20154 | Ca(ICC2/PI489777)SNP_09599 | 126  | C | G | 8   | 7   | --    | --  |
|            | Ca(ICC2/PI489777)SNP_09600 | 134  | G | A | 11  | 11  | --    | --  |
| CakTC42027 | Ca(ICC2/PI489777)SNP_09601 | 91   | A | T | 17  | 9   | --    | --  |
|            | Ca(ICC2/PI489777)SNP_09602 | 1615 | C | T | 21  | 4   | --    | --  |
| CakTC28738 | Ca(ICC2/PI489777)SNP_09603 | 409  | C | G | 28  | 15  | --    | --  |
|            | Ca(ICC2/PI489777)SNP_09604 | 439  | G | A | 27  | 14  | --    | --  |
|            | Ca(ICC2/PI489777)SNP_09605 | 490  | G | A | 36  | 12  | --    | --  |
|            | Ca(ICC2/PI489777)SNP_09606 | 920  | A | G | 7   | 11  | --    | --  |
| CakTC39408 | Ca(ICC2/PI489777)SNP_09607 | 334  | C | T | 32  | 12  | --    | --  |
|            | Ca(ICC2/PI489777)SNP_09608 | 342  | A | T | 50  | 20  | --    | --  |
|            | Ca(ICC2/PI489777)SNP_09609 | 386  | A | C | 94  | 29  | --    | --  |
|            | Ca(ICC2/PI489777)SNP_09610 | 414  | C | T | 108 | 37  | --    | --  |
|            | Ca(ICC2/PI489777)SNP_09611 | 1392 | A | G | 90  | 74  | --    | --  |
|            | Ca(ICC2/PI489777)SNP_09612 | 1490 | T | C | 74  | 60  | --    | --  |
|            | Ca(ICC2/PI489777)SNP_09613 | 1499 | G | C | 74  | 60  | --    | --  |
|            | Ca(ICC2/PI489777)SNP_09614 | 1554 | G | T | 77  | 54  | --    | --  |
| CakTC41156 | Ca(ICC2/PI489777)SNP_09615 | 2008 | C | T | 6   | 4   | --    | --  |

|            |                            |      |   |   |    |    |           |              |
|------------|----------------------------|------|---|---|----|----|-----------|--------------|
| CakTC33537 | Ca(ICC2/PI489777)SNP_09616 | 807  | A | G | 4  | 4  | --        | --           |
|            | Ca(ICC2/PI489777)SNP_09617 | 810  | T | C | 4  | 4  | --        | --           |
|            | Ca(ICC2/PI489777)SNP_09618 | 840  | T | A | 5  | 4  | --        | --           |
| CakTC30251 | Ca(ICC2/PI489777)SNP_09619 | 911  | A | T | 4  | 6  | --        | --           |
| CakTC13553 | Ca(ICC2/PI489777)SNP_09620 | 196  | G | A | 4  | 7  | --        | WRKY         |
|            | Ca(ICC2/PI489777)SNP_09621 | 256  | G | C | 6  | 8  | --        | WRKY         |
|            | Ca(ICC2/PI489777)SNP_09622 | 340  | A | G | 5  | 7  | --        | WRKY         |
|            | Ca(ICC2/PI489777)SNP_09623 | 382  | T | C | 9  | 7  | --        | WRKY         |
|            | Ca(ICC2/PI489777)SNP_09624 | 514  | T | C | 9  | 3  | --        | WRKY         |
|            | Ca(ICC2/PI489777)SNP_09625 | 1060 | G | A | 18 | 3  | --        | WRKY         |
| CakTC03738 | Ca(ICC2/PI489777)SNP_09626 | 194  | A | G | 4  | 10 | --        | --           |
| CakTC39273 | Ca(ICC2/PI489777)SNP_09627 | 196  | A | G | 4  | 5  | --        | --           |
| CakTC38362 | Ca(ICC2/PI489777)SNP_09628 | 353  | A | G | 10 | 8  | --        | --           |
|            | Ca(ICC2/PI489777)SNP_09629 | 715  | T | C | 11 | 9  | --        | --           |
|            | Ca(ICC2/PI489777)SNP_09630 | 867  | A | G | 10 | 7  | --        | --           |
|            | Ca(ICC2/PI489777)SNP_09631 | 998  | G | T | 8  | 7  | --        | --           |
|            | Ca(ICC2/PI489777)SNP_09632 | 1031 | G | A | 6  | 7  | --        | --           |
| CakTC22716 | Ca(ICC2/PI489777)SNP_09633 | 1024 | G | A | 3  | 3  | --        | --           |
| CakTC08292 | Ca(ICC2/PI489777)SNP_09634 | 213  | G | A | 3  | 4  | Young_pod | --           |
| CakTC23688 | Ca(ICC2/PI489777)SNP_09635 | 475  | A | T | 19 | 14 | --        | --           |
|            | Ca(ICC2/PI489777)SNP_09636 | 730  | C | G | 6  | 4  | --        | --           |
| CakTC41483 | Ca(ICC2/PI489777)SNP_09637 | 979  | A | G | 13 | 4  | --        | --           |
|            | Ca(ICC2/PI489777)SNP_09638 | 1024 | T | G | 13 | 4  | --        | --           |
|            | Ca(ICC2/PI489777)SNP_09639 | 1789 | A | T | 20 | 8  | --        | --           |
|            | Ca(ICC2/PI489777)SNP_09640 | 2063 | T | C | 24 | 5  | --        | --           |
| CakTC25739 | Ca(ICC2/PI489777)SNP_09641 | 344  | C | T | 62 | 39 | --        | --           |
|            | Ca(ICC2/PI489777)SNP_09642 | 404  | C | T | 66 | 40 | --        | --           |
| CakTC32524 | Ca(ICC2/PI489777)SNP_09643 | 334  | T | A | 3  | 6  | --        | --           |
| CakTC26707 | Ca(ICC2/PI489777)SNP_09644 | 105  | A | C | 5  | 4  | --        | --           |
|            | Ca(ICC2/PI489777)SNP_09645 | 509  | A | G | 12 | 5  | --        | --           |
|            | Ca(ICC2/PI489777)SNP_09646 | 1090 | A | G | 12 | 4  | --        | --           |
| CakTC33961 | Ca(ICC2/PI489777)SNP_09647 | 577  | T | C | 9  | 3  | --        | --           |
|            | Ca(ICC2/PI489777)SNP_09648 | 629  | G | C | 9  | 4  | --        | --           |
| CakTC36970 | Ca(ICC2/PI489777)SNP_09649 | 385  | A | G | 44 | 17 | --        | --           |
|            | Ca(ICC2/PI489777)SNP_09650 | 640  | G | A | 39 | 15 | --        | --           |
|            | Ca(ICC2/PI489777)SNP_09651 | 797  | C | T | 39 | 14 | --        | --           |
|            | Ca(ICC2/PI489777)SNP_09652 | 814  | A | G | 32 | 12 | --        | --           |
|            | Ca(ICC2/PI489777)SNP_09653 | 1615 | C | A | 51 | 17 | --        | --           |
|            | Ca(ICC2/PI489777)SNP_09654 | 1813 | G | A | 46 | 17 | --        | --           |
|            | Ca(ICC2/PI489777)SNP_09655 | 1840 | T | C | 47 | 18 | --        | --           |
|            | Ca(ICC2/PI489777)SNP_09656 | 2341 | A | G | 63 | 19 | --        | --           |
|            | Ca(ICC2/PI489777)SNP_09657 | 2454 | G | A | 40 | 18 | --        | --           |
| CakTC22458 | Ca(ICC2/PI489777)SNP_09658 | 183  | C | G | 8  | 3  | --        | --           |
|            | Ca(ICC2/PI489777)SNP_09659 | 250  | C | T | 5  | 4  | --        | --           |
|            | Ca(ICC2/PI489777)SNP_09660 | 340  | A | T | 11 | 5  | --        | --           |
|            | Ca(ICC2/PI489777)SNP_09661 | 441  | A | T | 12 | 4  | --        | --           |
|            | Ca(ICC2/PI489777)SNP_09662 | 613  | C | A | 17 | 3  | --        | --           |
|            | Ca(ICC2/PI489777)SNP_09663 | 923  | A | G | 8  | 13 | --        | --           |
|            | Ca(ICC2/PI489777)SNP_09664 | 1171 | G | A | 4  | 12 | --        | --           |
| CakTC07480 | Ca(ICC2/PI489777)SNP_09665 | 624  | C | G | 7  | 3  | --        | --           |
|            | Ca(ICC2/PI489777)SNP_09666 | 1011 | T | C | 7  | 5  | --        | --           |
| CakTC25836 | Ca(ICC2/PI489777)SNP_09667 | 1141 | T | A | 65 | 10 | --        | Sigma70-like |
|            | Ca(ICC2/PI489777)SNP_09668 | 1297 | G | C | 48 | 10 | --        | Sigma70-like |
| CakTC09738 | Ca(ICC2/PI489777)SNP_09669 | 15   | C | T | 6  | 17 | Flower    | bud          |
|            | Ca(ICC2/PI489777)SNP_09670 | 188  | T | C | 10 | 47 | Flower    | bud          |
| CakTC42193 | Ca(ICC2/PI489777)SNP_09671 | 53   | G | A | 17 | 3  | --        | --           |
|            | Ca(ICC2/PI489777)SNP_09672 | 231  | C | A | 78 | 45 | --        | --           |
|            | Ca(ICC2/PI489777)SNP_09673 | 285  | C | T | 84 | 51 | --        | --           |
|            | Ca(ICC2/PI489777)SNP_09674 | 315  | G | A | 76 | 49 | --        | --           |
|            | Ca(ICC2/PI489777)SNP_09675 | 558  | C | T | 50 | 37 | --        | --           |
| CakTC29977 | Ca(ICC2/PI489777)SNP_09676 | 334  | T | C | 32 | 20 | --        | --           |
|            | Ca(ICC2/PI489777)SNP_09677 | 531  | C | T | 33 | 27 | --        | --           |
|            | Ca(ICC2/PI489777)SNP_09678 | 696  | T | C | 53 | 25 | --        | --           |
|            | Ca(ICC2/PI489777)SNP_09679 | 871  | A | G | 44 | 24 | --        | --           |
|            | Ca(ICC2/PI489777)SNP_09680 | 1501 | G | C | 54 | 18 | --        | --           |
|            | Ca(ICC2/PI489777)SNP_09681 | 1989 | C | G | 41 | 11 | --        | --           |
|            | Ca(ICC2/PI489777)SNP_09682 | 2044 | T | G | 41 | 12 | --        | --           |
| CakTC30444 | Ca(ICC2/PI489777)SNP_09683 | 797  | G | A | 3  | 7  | Shoot     | --           |
|            | Ca(ICC2/PI489777)SNP_09684 | 1700 | C | G | 6  | 3  | Shoot     | --           |
| CakTC38513 | Ca(ICC2/PI489777)SNP_09685 | 632  | T | C | 5  | 11 | --        | --           |
| CakTC02278 | Ca(ICC2/PI489777)SNP_09686 | 72   | C | T | 15 | 4  | --        | --           |
| CakTC01014 | Ca(ICC2/PI489777)SNP_09687 | 860  | T | C | 8  | 5  | --        | --           |
|            | Ca(ICC2/PI489777)SNP_09688 | 877  | C | G | 8  | 4  | --        | --           |
|            | Ca(ICC2/PI489777)SNP_09689 | 1039 | C | T | 10 | 6  | --        | --           |

|            |                            |      |   |   |    |    |        |     |
|------------|----------------------------|------|---|---|----|----|--------|-----|
|            | Ca(ICC2/PI489777)SNP_09690 | 1181 | C | T | 12 | 8  | --     | --  |
|            | Ca(ICC2/PI489777)SNP_09691 | 1189 | A | G | 13 | 11 | --     | --  |
|            | Ca(ICC2/PI489777)SNP_09692 | 1390 | C | A | 10 | 6  | --     | --  |
|            | Ca(ICC2/PI489777)SNP_09693 | 1840 | C | T | 8  | 3  | --     | --  |
|            | Ca(ICC2/PI489777)SNP_09694 | 2207 | T | C | 3  | 6  | --     | --  |
| CakTC28458 | Ca(ICC2/PI489777)SNP_09695 | 3503 | T | C | 28 | 12 | --     | --  |
|            | Ca(ICC2/PI489777)SNP_09696 | 3558 | A | G | 28 | 10 | --     | --  |
|            | Ca(ICC2/PI489777)SNP_09697 | 4247 | A | G | 4  | 5  | --     | --  |
| CakTC16037 | Ca(ICC2/PI489777)SNP_09698 | 125  | T | G | 4  | 5  | --     | --  |
| CakTC38459 | Ca(ICC2/PI489777)SNP_09699 | 793  | T | C | 6  | 9  | --     | --  |
| CakTC27126 | Ca(ICC2/PI489777)SNP_09700 | 174  | C | A | 3  | 4  | --     | --  |
|            | Ca(ICC2/PI489777)SNP_09701 | 186  | T | A | 3  | 4  | --     | --  |
| CakTC41725 | Ca(ICC2/PI489777)SNP_09702 | 269  | G | A | 4  | 5  | Flower | bud |
|            | Ca(ICC2/PI489777)SNP_09703 | 363  | A | C | 7  | 7  | Flower | bud |
|            | Ca(ICC2/PI489777)SNP_09704 | 1293 | G | A | 7  | 4  | Flower | bud |
| CakTC40764 | Ca(ICC2/PI489777)SNP_09705 | 322  | C | T | 17 | 3  | --     | --  |
|            | Ca(ICC2/PI489777)SNP_09706 | 511  | C | T | 19 | 5  | --     | --  |
| CakTC23244 | Ca(ICC2/PI489777)SNP_09707 | 23   | C | T | 5  | 4  | --     | --  |
| CakTC38142 | Ca(ICC2/PI489777)SNP_09708 | 1473 | A | T | 13 | 4  | --     | --  |
| CakTC25754 | Ca(ICC2/PI489777)SNP_09709 | 61   | T | A | 13 | 4  | --     | --  |
| CakTC41037 | Ca(ICC2/PI489777)SNP_09710 | 770  | G | A | 34 | 19 | --     | --  |
|            | Ca(ICC2/PI489777)SNP_09711 | 1914 | A | C | 10 | 5  | --     | --  |
| CakTC08281 | Ca(ICC2/PI489777)SNP_09712 | 478  | T | C | 11 | 7  | --     | --  |
| CakTC35965 | Ca(ICC2/PI489777)SNP_09713 | 409  | C | T | 3  | 10 | --     | --  |
| CakTC32256 | Ca(ICC2/PI489777)SNP_09714 | 457  | C | T | 51 | 9  | --     | --  |
|            | Ca(ICC2/PI489777)SNP_09715 | 482  | T | C | 58 | 10 | --     | --  |
|            | Ca(ICC2/PI489777)SNP_09716 | 512  | A | G | 67 | 10 | --     | --  |
|            | Ca(ICC2/PI489777)SNP_09717 | 685  | A | G | 83 | 13 | --     | --  |
|            | Ca(ICC2/PI489777)SNP_09718 | 922  | C | T | 65 | 28 | --     | --  |
|            | Ca(ICC2/PI489777)SNP_09719 | 925  | G | C | 64 | 28 | --     | --  |
|            | Ca(ICC2/PI489777)SNP_09720 | 1136 | T | G | 60 | 31 | --     | --  |
|            | Ca(ICC2/PI489777)SNP_09721 | 1531 | G | A | 17 | 7  | --     | --  |
| CakTC29350 | Ca(ICC2/PI489777)SNP_09722 | 1179 | T | C | 9  | 3  | --     | --  |
| CakTC39009 | Ca(ICC2/PI489777)SNP_09723 | 1303 | T | C | 5  | 4  | --     | --  |
| CakTC29691 | Ca(ICC2/PI489777)SNP_09724 | 663  | T | C | 3  | 4  | --     | --  |
|            | Ca(ICC2/PI489777)SNP_09725 | 848  | T | C | 3  | 5  | --     | --  |
| CakTC36777 | Ca(ICC2/PI489777)SNP_09726 | 577  | G | A | 19 | 12 | --     | --  |
|            | Ca(ICC2/PI489777)SNP_09727 | 1150 | G | A | 9  | 10 | --     | --  |
|            | Ca(ICC2/PI489777)SNP_09728 | 1345 | T | C | 14 | 11 | --     | --  |
|            | Ca(ICC2/PI489777)SNP_09729 | 1951 | A | G | 15 | 19 | --     | --  |
|            | Ca(ICC2/PI489777)SNP_09730 | 2383 | A | G | 24 | 10 | --     | --  |
| CakTC36846 | Ca(ICC2/PI489777)SNP_09731 | 718  | C | T | 14 | 7  | --     | --  |
|            | Ca(ICC2/PI489777)SNP_09732 | 750  | T | C | 14 | 7  | --     | --  |
|            | Ca(ICC2/PI489777)SNP_09733 | 758  | C | G | 14 | 8  | --     | --  |
|            | Ca(ICC2/PI489777)SNP_09734 | 786  | G | A | 7  | 8  | --     | --  |
|            | Ca(ICC2/PI489777)SNP_09735 | 2604 | C | T | 5  | 4  | --     | --  |
| CakTC41557 | Ca(ICC2/PI489777)SNP_09736 | 658  | C | T | 43 | 30 | --     | --  |
| CakTC34542 | Ca(ICC2/PI489777)SNP_09737 | 381  | T | C | 22 | 7  | --     | --  |
|            | Ca(ICC2/PI489777)SNP_09738 | 528  | C | T | 10 | 7  | --     | --  |
|            | Ca(ICC2/PI489777)SNP_09739 | 798  | C | T | 21 | 3  | --     | --  |
|            | Ca(ICC2/PI489777)SNP_09740 | 807  | T | C | 20 | 4  | --     | --  |
|            | Ca(ICC2/PI489777)SNP_09741 | 927  | G | A | 19 | 6  | --     | --  |
|            | Ca(ICC2/PI489777)SNP_09742 | 1066 | T | C | 25 | 9  | --     | --  |
|            | Ca(ICC2/PI489777)SNP_09743 | 1080 | C | A | 23 | 7  | --     | --  |
|            | Ca(ICC2/PI489777)SNP_09744 | 1131 | T | A | 22 | 8  | --     | --  |
|            | Ca(ICC2/PI489777)SNP_09745 | 1557 | A | G | 23 | 14 | --     | --  |
| CakTC33806 | Ca(ICC2/PI489777)SNP_09746 | 403  | T | A | 6  | 6  | --     | --  |
| CakTC40893 | Ca(ICC2/PI489777)SNP_09747 | 248  | T | A | 9  | 3  | --     | --  |
|            | Ca(ICC2/PI489777)SNP_09748 | 498  | A | G | 11 | 3  | --     | --  |
|            | Ca(ICC2/PI489777)SNP_09749 | 1434 | C | T | 26 | 11 | --     | --  |
| CakTC23206 | Ca(ICC2/PI489777)SNP_09750 | 785  | G | A | 14 | 5  | --     | --  |
|            | Ca(ICC2/PI489777)SNP_09751 | 914  | C | A | 9  | 4  | --     | --  |
|            | Ca(ICC2/PI489777)SNP_09752 | 1002 | T | G | 9  | 5  | --     | --  |
| CakTC23259 | Ca(ICC2/PI489777)SNP_09753 | 539  | T | G | 7  | 5  | Flower | bud |
| CakTC37272 | Ca(ICC2/PI489777)SNP_09754 | 56   | G | T | 27 | 21 | --     | --  |
|            | Ca(ICC2/PI489777)SNP_09755 | 80   | A | G | 40 | 30 | --     | --  |
|            | Ca(ICC2/PI489777)SNP_09756 | 86   | A | G | 59 | 37 | --     | --  |
|            | Ca(ICC2/PI489777)SNP_09757 | 242  | T | C | 84 | 42 | --     | --  |
|            | Ca(ICC2/PI489777)SNP_09758 | 549  | C | G | 46 | 41 | --     | --  |
|            | Ca(ICC2/PI489777)SNP_09759 | 628  | A | C | 48 | 26 | --     | --  |
|            | Ca(ICC2/PI489777)SNP_09760 | 638  | C | T | 45 | 25 | --     | --  |
|            | Ca(ICC2/PI489777)SNP_09761 | 1024 | T | G | 30 | 20 | --     | --  |
|            | Ca(ICC2/PI489777)SNP_09762 | 1034 | G | T | 27 | 14 | --     | --  |
| CakTC28779 | Ca(ICC2/PI489777)SNP_09763 | 372  | G | A | 20 | 8  | --     | --  |

|            |                             |      |   |   |    |    |      |           |
|------------|-----------------------------|------|---|---|----|----|------|-----------|
| CakTC38833 | Ca(ICCV2/PI489777)SNP_09764 | 1097 | G | C | 8  | 4  | --   | bHLH      |
| CakTC28610 | Ca(ICCV2/PI489777)SNP_09765 | 141  | T | A | 36 | 39 | --   | --        |
|            | Ca(ICCV2/PI489777)SNP_09766 | 686  | T | G | 14 | 7  | --   | --        |
| CakTC26232 | Ca(ICCV2/PI489777)SNP_09767 | 344  | A | G | 15 | 4  | --   | --        |
|            | Ca(ICCV2/PI489777)SNP_09768 | 427  | T | A | 17 | 4  | --   | --        |
|            | Ca(ICCV2/PI489777)SNP_09769 | 431  | C | T | 18 | 4  | --   | --        |
|            | Ca(ICCV2/PI489777)SNP_09770 | 457  | C | T | 16 | 4  | --   | --        |
|            | Ca(ICCV2/PI489777)SNP_09771 | 485  | T | C | 14 | 4  | --   | --        |
|            | Ca(ICCV2/PI489777)SNP_09772 | 1146 | T | G | 7  | 5  | --   | --        |
| CakTC42187 | Ca(ICCV2/PI489777)SNP_09773 | 78   | C | T | 31 | 3  | --   | --        |
|            | Ca(ICCV2/PI489777)SNP_09774 | 304  | T | G | 37 | 3  | --   | --        |
|            | Ca(ICCV2/PI489777)SNP_09775 | 546  | C | G | 38 | 8  | --   | --        |
| CakTC33473 | Ca(ICCV2/PI489777)SNP_09776 | 1009 | A | G | 22 | 13 | --   | --        |
|            | Ca(ICCV2/PI489777)SNP_09777 | 1330 | C | T | 19 | 9  | --   | --        |
|            | Ca(ICCV2/PI489777)SNP_09778 | 1333 | T | C | 18 | 10 | --   | --        |
|            | Ca(ICCV2/PI489777)SNP_09779 | 1435 | G | A | 12 | 8  | --   | --        |
| CakTC32149 | Ca(ICCV2/PI489777)SNP_09780 | 418  | G | A | 3  | 5  | --   | AP2-EREBP |
|            | Ca(ICCV2/PI489777)SNP_09781 | 442  | A | G | 3  | 5  | --   | AP2-EREBP |
| CakTC36990 | Ca(ICCV2/PI489777)SNP_09782 | 462  | C | T | 5  | 7  | Root | --        |
|            | Ca(ICCV2/PI489777)SNP_09783 | 555  | G | A | 7  | 9  | Root | --        |
|            | Ca(ICCV2/PI489777)SNP_09784 | 562  | T | A | 6  | 9  | Root | --        |
|            | Ca(ICCV2/PI489777)SNP_09785 | 567  | T | A | 8  | 11 | Root | --        |
|            | Ca(ICCV2/PI489777)SNP_09786 | 652  | T | C | 15 | 10 | Root | --        |
|            | Ca(ICCV2/PI489777)SNP_09787 | 849  | C | A | 19 | 16 | Root | --        |
|            | Ca(ICCV2/PI489777)SNP_09788 | 963  | G | T | 16 | 17 | Root | --        |
|            | Ca(ICCV2/PI489777)SNP_09789 | 2539 | G | A | 4  | 5  | Root | --        |
|            | Ca(ICCV2/PI489777)SNP_09790 | 2556 | A | C | 3  | 5  | Root | --        |
| CakTC42924 | Ca(ICCV2/PI489777)SNP_09791 | 24   | T | A | 16 | 3  | --   | --        |
|            | Ca(ICCV2/PI489777)SNP_09792 | 29   | T | C | 17 | 4  | --   | --        |
|            | Ca(ICCV2/PI489777)SNP_09793 | 35   | A | G | 17 | 4  | --   | --        |
|            | Ca(ICCV2/PI489777)SNP_09794 | 50   | A | G | 11 | 4  | --   | --        |
|            | Ca(ICCV2/PI489777)SNP_09795 | 57   | G | T | 18 | 4  | --   | --        |
|            | Ca(ICCV2/PI489777)SNP_09796 | 62   | G | A | 19 | 4  | --   | --        |
|            | Ca(ICCV2/PI489777)SNP_09797 | 71   | A | G | 18 | 5  | --   | --        |
|            | Ca(ICCV2/PI489777)SNP_09798 | 76   | T | G | 19 | 5  | --   | --        |
|            | Ca(ICCV2/PI489777)SNP_09799 | 130  | G | A | 19 | 7  | --   | --        |
|            | Ca(ICCV2/PI489777)SNP_09800 | 224  | C | T | 17 | 7  | --   | --        |
|            | Ca(ICCV2/PI489777)SNP_09801 | 245  | A | T | 19 | 6  | --   | --        |
|            | Ca(ICCV2/PI489777)SNP_09802 | 563  | T | G | 18 | 8  | --   | --        |
|            | Ca(ICCV2/PI489777)SNP_09803 | 606  | C | G | 17 | 9  | --   | --        |
| CakTC38411 | Ca(ICCV2/PI489777)SNP_09804 | 222  | C | T | 40 | 15 | --   | --        |
|            | Ca(ICCV2/PI489777)SNP_09805 | 384  | T | C | 49 | 25 | --   | --        |
|            | Ca(ICCV2/PI489777)SNP_09806 | 955  | T | C | 32 | 22 | --   | --        |
|            | Ca(ICCV2/PI489777)SNP_09807 | 1029 | C | G | 33 | 16 | --   | --        |
| CakTC36770 | Ca(ICCV2/PI489777)SNP_09808 | 922  | T | C | 7  | 9  | --   | --        |
|            | Ca(ICCV2/PI489777)SNP_09809 | 943  | A | T | 8  | 8  | --   | --        |
|            | Ca(ICCV2/PI489777)SNP_09810 | 1356 | G | C | 11 | 6  | --   | --        |
|            | Ca(ICCV2/PI489777)SNP_09811 | 1909 | C | T | 7  | 9  | --   | --        |
|            | Ca(ICCV2/PI489777)SNP_09812 | 2276 | G | T | 9  | 12 | --   | --        |
|            | Ca(ICCV2/PI489777)SNP_09813 | 2306 | A | C | 13 | 11 | --   | --        |
|            | Ca(ICCV2/PI489777)SNP_09814 | 2357 | G | A | 12 | 10 | --   | --        |
|            | Ca(ICCV2/PI489777)SNP_09815 | 2391 | C | T | 11 | 10 | --   | --        |
|            | Ca(ICCV2/PI489777)SNP_09816 | 2444 | G | T | 14 | 10 | --   | --        |
|            | Ca(ICCV2/PI489777)SNP_09817 | 2462 | C | T | 12 | 9  | --   | --        |
| CakTC25415 | Ca(ICCV2/PI489777)SNP_09818 | 865  | C | G | 18 | 12 | --   | --        |
| CakTC26463 | Ca(ICCV2/PI489777)SNP_09819 | 344  | G | C | 14 | 8  | --   | --        |
|            | Ca(ICCV2/PI489777)SNP_09820 | 695  | G | T | 25 | 6  | --   | --        |
|            | Ca(ICCV2/PI489777)SNP_09821 | 698  | C | G | 25 | 7  | --   | --        |
|            | Ca(ICCV2/PI489777)SNP_09822 | 818  | G | T | 27 | 5  | --   | --        |
|            | Ca(ICCV2/PI489777)SNP_09823 | 827  | T | C | 27 | 7  | --   | --        |
|            | Ca(ICCV2/PI489777)SNP_09824 | 926  | T | C | 22 | 11 | --   | --        |
|            | Ca(ICCV2/PI489777)SNP_09825 | 929  | C | A | 17 | 11 | --   | --        |
|            | Ca(ICCV2/PI489777)SNP_09826 | 1144 | A | G | 27 | 10 | --   | --        |
|            | Ca(ICCV2/PI489777)SNP_09827 | 1239 | G | T | 20 | 7  | --   | --        |
| CakTC39436 | Ca(ICCV2/PI489777)SNP_09828 | 570  | G | A | 41 | 53 | --   | --        |
|            | Ca(ICCV2/PI489777)SNP_09829 | 683  | C | T | 45 | 55 | --   | --        |
|            | Ca(ICCV2/PI489777)SNP_09830 | 702  | C | T | 48 | 48 | --   | --        |
|            | Ca(ICCV2/PI489777)SNP_09831 | 1264 | A | G | 28 | 18 | --   | --        |
| CakTC28970 | Ca(ICCV2/PI489777)SNP_09832 | 894  | C | A | 10 | 3  | --   | --        |
| CakTC06432 | Ca(ICCV2/PI489777)SNP_09833 | 1355 | C | G | 9  | 3  | --   | --        |
|            | Ca(ICCV2/PI489777)SNP_09834 | 1895 | G | A | 8  | 3  | --   | --        |
|            | Ca(ICCV2/PI489777)SNP_09835 | 2955 | T | C | 4  | 12 | --   | --        |
| CakTC32992 | Ca(ICCV2/PI489777)SNP_09836 | 1071 | T | C | 5  | 3  | --   | --        |
|            | Ca(ICCV2/PI489777)SNP_09837 | 1458 | T | C | 10 | 3  | --   | --        |

|            |                             |      |   |   |    |    |           |             |
|------------|-----------------------------|------|---|---|----|----|-----------|-------------|
|            | Ca(ICCV2/PI489777)SNP_09838 | 1896 | C | T | 5  | 4  | --        | --          |
|            | Ca(ICCV2/PI489777)SNP_09839 | 2314 | G | T | 8  | 4  | --        | --          |
|            | Ca(ICCV2/PI489777)SNP_09840 | 2449 | G | A | 12 | 4  | --        | --          |
|            | Ca(ICCV2/PI489777)SNP_09841 | 2750 | G | A | 10 | 7  | --        | --          |
|            | Ca(ICCV2/PI489777)SNP_09842 | 2786 | T | A | 6  | 7  | --        | --          |
|            | Ca(ICCV2/PI489777)SNP_09843 | 2844 | G | T | 7  | 6  | --        | --          |
|            | Ca(ICCV2/PI489777)SNP_09844 | 3015 | T | C | 15 | 3  | --        | --          |
|            | Ca(ICCV2/PI489777)SNP_09845 | 3278 | A | C | 19 | 5  | --        | --          |
|            | Ca(ICCV2/PI489777)SNP_09846 | 3295 | G | T | 23 | 5  | --        | --          |
|            | Ca(ICCV2/PI489777)SNP_09847 | 3372 | T | C | 16 | 6  | --        | --          |
|            | Ca(ICCV2/PI489777)SNP_09848 | 3661 | G | A | 14 | 11 | --        | --          |
|            | Ca(ICCV2/PI489777)SNP_09849 | 3690 | A | G | 16 | 11 | --        | --          |
|            | Ca(ICCV2/PI489777)SNP_09850 | 3855 | G | A | 8  | 13 | --        | --          |
|            | Ca(ICCV2/PI489777)SNP_09851 | 3871 | C | G | 8  | 10 | --        | --          |
|            | Ca(ICCV2/PI489777)SNP_09852 | 4134 | G | A | 5  | 7  | --        | --          |
| CakTC37180 | Ca(ICCV2/PI489777)SNP_09853 | 120  | T | C | 13 | 10 | --        | --          |
|            | Ca(ICCV2/PI489777)SNP_09854 | 252  | T | C | 12 | 8  | --        | --          |
| CakTC31693 | Ca(ICCV2/PI489777)SNP_09855 | 78   | T | C | 5  | 3  | --        | --          |
|            | Ca(ICCV2/PI489777)SNP_09856 | 110  | C | T | 7  | 4  | --        | --          |
|            | Ca(ICCV2/PI489777)SNP_09857 | 361  | C | A | 14 | 3  | --        | --          |
|            | Ca(ICCV2/PI489777)SNP_09858 | 1154 | G | A | 4  | 3  | --        | --          |
| CakTC29551 | Ca(ICCV2/PI489777)SNP_09859 | 789  | G | A | 15 | 5  | --        | --          |
|            | Ca(ICCV2/PI489777)SNP_09860 | 1108 | G | C | 11 | 10 | --        | --          |
|            | Ca(ICCV2/PI489777)SNP_09861 | 1394 | C | T | 11 | 9  | --        | --          |
|            | Ca(ICCV2/PI489777)SNP_09862 | 1448 | T | C | 8  | 8  | --        | --          |
|            | Ca(ICCV2/PI489777)SNP_09863 | 1474 | T | C | 8  | 8  | --        | --          |
| CakTC42899 | Ca(ICCV2/PI489777)SNP_09864 | 1371 | C | G | 4  | 3  | --        | Bromodomain |
| CakTC38737 | Ca(ICCV2/PI489777)SNP_09865 | 523  | T | C | 5  | 4  | --        | --          |
|            | Ca(ICCV2/PI489777)SNP_09866 | 568  | C | G | 7  | 4  | --        | --          |
| CakTC28929 | Ca(ICCV2/PI489777)SNP_09867 | 581  | T | G | 7  | 13 | Young_pod | TCP         |
|            | Ca(ICCV2/PI489777)SNP_09868 | 719  | A | G | 9  | 11 | Young_pod | TCP         |
|            | Ca(ICCV2/PI489777)SNP_09869 | 731  | G | A | 10 | 12 | Young_pod | TCP         |
| CakTC39283 | Ca(ICCV2/PI489777)SNP_09870 | 508  | G | A | 11 | 7  | --        | SAP         |
|            | Ca(ICCV2/PI489777)SNP_09871 | 672  | C | A | 9  | 4  | --        | SAP         |
|            | Ca(ICCV2/PI489777)SNP_09872 | 1051 | G | A | 6  | 4  | --        | SAP         |
|            | Ca(ICCV2/PI489777)SNP_09873 | 1204 | C | T | 8  | 7  | --        | SAP         |
|            | Ca(ICCV2/PI489777)SNP_09874 | 1442 | A | G | 4  | 6  | --        | SAP         |
|            | Ca(ICCV2/PI489777)SNP_09875 | 1507 | G | C | 3  | 3  | --        | SAP         |
| CakTC31103 | Ca(ICCV2/PI489777)SNP_09876 | 1045 | A | G | 3  | 5  | --        | Trihelix    |
| CakTC33042 | Ca(ICCV2/PI489777)SNP_09877 | 192  | T | C | 12 | 13 | --        | --          |
|            | Ca(ICCV2/PI489777)SNP_09878 | 749  | A | C | 38 | 20 | --        | --          |
|            | Ca(ICCV2/PI489777)SNP_09879 | 854  | T | C | 43 | 24 | --        | --          |
|            | Ca(ICCV2/PI489777)SNP_09880 | 863  | A | G | 36 | 25 | --        | --          |
|            | Ca(ICCV2/PI489777)SNP_09881 | 2363 | C | T | 77 | 62 | --        | --          |
|            | Ca(ICCV2/PI489777)SNP_09882 | 2522 | C | T | 42 | 37 | --        | --          |
|            | Ca(ICCV2/PI489777)SNP_09883 | 2567 | A | C | 40 | 47 | --        | --          |
| CakTC32389 | Ca(ICCV2/PI489777)SNP_09884 | 1276 | T | C | 6  | 11 | --        | --          |
| CakTC35712 | Ca(ICCV2/PI489777)SNP_09885 | 626  | A | G | 24 | 17 | --        | --          |
|            | Ca(ICCV2/PI489777)SNP_09886 | 1148 | T | C | 12 | 13 | --        | --          |
|            | Ca(ICCV2/PI489777)SNP_09887 | 1636 | T | C | 14 | 11 | --        | --          |
|            | Ca(ICCV2/PI489777)SNP_09888 | 2143 | A | T | 19 | 12 | --        | --          |
|            | Ca(ICCV2/PI489777)SNP_09889 | 2839 | C | T | 12 | 7  | --        | --          |
|            | Ca(ICCV2/PI489777)SNP_09890 | 2867 | C | T | 11 | 4  | --        | --          |
|            | Ca(ICCV2/PI489777)SNP_09891 | 3099 | C | T | 10 | 6  | --        | --          |
|            | Ca(ICCV2/PI489777)SNP_09892 | 3155 | G | C | 7  | 6  | --        | --          |
| CakTC39648 | Ca(ICCV2/PI489777)SNP_09893 | 90   | G | C | 11 | 4  | --        | --          |
|            | Ca(ICCV2/PI489777)SNP_09894 | 153  | T | C | 9  | 5  | --        | --          |
|            | Ca(ICCV2/PI489777)SNP_09895 | 162  | C | T | 6  | 5  | --        | --          |
|            | Ca(ICCV2/PI489777)SNP_09896 | 477  | C | T | 16 | 9  | --        | --          |
| CakTC37358 | Ca(ICCV2/PI489777)SNP_09897 | 832  | G | A | 54 | 18 | --        | --          |
| CakTC37319 | Ca(ICCV2/PI489777)SNP_09898 | 162  | G | C | 8  | 7  | --        | --          |
|            | Ca(ICCV2/PI489777)SNP_09899 | 242  | G | A | 10 | 11 | --        | --          |
| CakTC26485 | Ca(ICCV2/PI489777)SNP_09900 | 268  | G | A | 12 | 14 | --        | --          |
|            | Ca(ICCV2/PI489777)SNP_09901 | 368  | A | G | 18 | 18 | --        | --          |
|            | Ca(ICCV2/PI489777)SNP_09902 | 573  | G | A | 44 | 13 | --        | --          |
|            | Ca(ICCV2/PI489777)SNP_09903 | 933  | T | C | 42 | 17 | --        | --          |
|            | Ca(ICCV2/PI489777)SNP_09904 | 1686 | C | T | 16 | 4  | --        | --          |
| CakTC28906 | Ca(ICCV2/PI489777)SNP_09905 | 175  | T | G | 3  | 6  | --        | --          |
| CakTC35347 | Ca(ICCV2/PI489777)SNP_09906 | 1029 | C | T | 4  | 5  | --        | --          |
|            | Ca(ICCV2/PI489777)SNP_09907 | 1343 | A | T | 9  | 6  | --        | --          |
| CakTC03796 | Ca(ICCV2/PI489777)SNP_09908 | 213  | A | G | 3  | 11 | --        | --          |
| CakTC42493 | Ca(ICCV2/PI489777)SNP_09909 | 1048 | T | C | 4  | 13 | --        | --          |
| CakTC38315 | Ca(ICCV2/PI489777)SNP_09910 | 246  | G | T | 39 | 25 | Flower    | bud         |
|            | Ca(ICCV2/PI489777)SNP_09911 | 1359 | T | G | 20 | 11 | Flower    | bud         |

|            |                            |      |   |   |    |    |           |      |
|------------|----------------------------|------|---|---|----|----|-----------|------|
|            | Ca(ICC2/PI489777)SNP_09912 | 1442 | A | G | 13 | 7  | Flower    | bud  |
| CakTC40095 | Ca(ICC2/PI489777)SNP_09913 | 403  | T | C | 17 | 4  | --        | --   |
| CakTC11412 | Ca(ICC2/PI489777)SNP_09914 | 47   | A | T | 9  | 7  | --        | --   |
|            | Ca(ICC2/PI489777)SNP_09915 | 175  | T | C | 14 | 13 | --        | --   |
|            | Ca(ICC2/PI489777)SNP_09916 | 575  | A | G | 9  | 4  | --        | --   |
|            | Ca(ICC2/PI489777)SNP_09917 | 594  | T | C | 8  | 3  | --        | --   |
|            | Ca(ICC2/PI489777)SNP_09918 | 657  | C | T | 4  | 3  | --        | --   |
| CakTC40226 | Ca(ICC2/PI489777)SNP_09919 | 924  | C | T | 15 | 14 | --        | --   |
|            | Ca(ICC2/PI489777)SNP_09920 | 1371 | C | T | 9  | 5  | --        | --   |
| CakTC25355 | Ca(ICC2/PI489777)SNP_09921 | 751  | A | G | 34 | 7  | --        | --   |
|            | Ca(ICC2/PI489777)SNP_09922 | 1022 | C | T | 36 | 8  | --        | --   |
|            | Ca(ICC2/PI489777)SNP_09923 | 1364 | T | C | 8  | 3  | --        | --   |
|            | Ca(ICC2/PI489777)SNP_09924 | 2395 | A | G | 12 | 3  | --        | --   |
| CakTC39871 | Ca(ICC2/PI489777)SNP_09925 | 631  | T | C | 77 | 35 | --        | bZIP |
|            | Ca(ICC2/PI489777)SNP_09926 | 792  | C | G | 92 | 52 | --        | bZIP |
|            | Ca(ICC2/PI489777)SNP_09927 | 1348 | G | T | 30 | 20 | --        | bZIP |
| CakTC38017 | Ca(ICC2/PI489777)SNP_09928 | 120  | G | C | 3  | 7  | --        | --   |
|            | Ca(ICC2/PI489777)SNP_09929 | 207  | G | T | 8  | 7  | --        | --   |
| CakTC23679 | Ca(ICC2/PI489777)SNP_09930 | 908  | T | C | 33 | 7  | Flower    | bud  |
| CakTC42658 | Ca(ICC2/PI489777)SNP_09931 | 163  | T | C | 5  | 10 | --        | --   |
| CakTC24361 | Ca(ICC2/PI489777)SNP_09932 | 239  | G | A | 6  | 3  | Young_pod | --   |
|            | Ca(ICC2/PI489777)SNP_09933 | 252  | T | A | 4  | 4  | Young_pod | --   |
|            | Ca(ICC2/PI489777)SNP_09934 | 291  | A | C | 3  | 4  | Young_pod | --   |
|            | Ca(ICC2/PI489777)SNP_09935 | 324  | T | C | 3  | 4  | Young_pod | --   |
|            | Ca(ICC2/PI489777)SNP_09936 | 369  | T | C | 3  | 4  | Young_pod | --   |
|            | Ca(ICC2/PI489777)SNP_09937 | 416  | T | C | 3  | 4  | Young_pod | --   |
|            | Ca(ICC2/PI489777)SNP_09938 | 417  | T | C | 3  | 4  | Young_pod | --   |
|            | Ca(ICC2/PI489777)SNP_09939 | 449  | C | T | 4  | 3  | Young_pod | --   |
|            | Ca(ICC2/PI489777)SNP_09940 | 451  | A | G | 4  | 4  | Young_pod | --   |
|            | Ca(ICC2/PI489777)SNP_09941 | 980  | T | G | 4  | 3  | Young_pod | --   |
|            | Ca(ICC2/PI489777)SNP_09942 | 981  | G | A | 4  | 3  | Young_pod | --   |
|            | Ca(ICC2/PI489777)SNP_09943 | 1060 | C | T | 3  | 3  | Young_pod | --   |
|            | Ca(ICC2/PI489777)SNP_09944 | 1085 | A | C | 3  | 3  | Young_pod | --   |
|            | Ca(ICC2/PI489777)SNP_09945 | 1096 | C | T | 3  | 3  | Young_pod | --   |
|            | Ca(ICC2/PI489777)SNP_09946 | 1178 | C | T | 3  | 3  | Young_pod | --   |
| CakTC40168 | Ca(ICC2/PI489777)SNP_09947 | 783  | A | G | 4  | 4  | --        | --   |
| CakTC24642 | Ca(ICC2/PI489777)SNP_09948 | 183  | C | A | 17 | 4  | --        | --   |
|            | Ca(ICC2/PI489777)SNP_09949 | 189  | T | C | 17 | 4  | --        | --   |
|            | Ca(ICC2/PI489777)SNP_09950 | 449  | G | C | 38 | 10 | --        | --   |
|            | Ca(ICC2/PI489777)SNP_09951 | 464  | A | G | 37 | 10 | --        | --   |
|            | Ca(ICC2/PI489777)SNP_09952 | 650  | G | A | 38 | 20 | --        | --   |
|            | Ca(ICC2/PI489777)SNP_09953 | 1202 | A | C | 35 | 10 | --        | --   |
| CakTC11906 | Ca(ICC2/PI489777)SNP_09954 | 1406 | A | C | 24 | 4  | Shoot     | --   |
| CakTC27989 | Ca(ICC2/PI489777)SNP_09955 | 1086 | G | A | 16 | 9  | --        | --   |
| CakTC37474 | Ca(ICC2/PI489777)SNP_09956 | 153  | T | A | 31 | 21 | --        | --   |
|            | Ca(ICC2/PI489777)SNP_09957 | 411  | G | T | 43 | 26 | --        | --   |
|            | Ca(ICC2/PI489777)SNP_09958 | 775  | T | C | 23 | 8  | --        | --   |
|            | Ca(ICC2/PI489777)SNP_09959 | 798  | C | T | 23 | 6  | --        | --   |
| CakTC34697 | Ca(ICC2/PI489777)SNP_09960 | 312  | C | A | 12 | 6  | --        | --   |
|            | Ca(ICC2/PI489777)SNP_09961 | 315  | A | C | 11 | 6  | --        | --   |
|            | Ca(ICC2/PI489777)SNP_09962 | 2781 | C | G | 16 | 3  | --        | --   |
| CakTC38350 | Ca(ICC2/PI489777)SNP_09963 | 697  | A | C | 8  | 3  | Mature    | Leaf |
|            | Ca(ICC2/PI489777)SNP_09964 | 749  | C | T | 11 | 3  | Mature    | Leaf |
|            | Ca(ICC2/PI489777)SNP_09965 | 844  | T | A | 14 | 4  | Mature    | Leaf |
|            | Ca(ICC2/PI489777)SNP_09966 | 858  | T | C | 13 | 4  | Mature    | Leaf |
|            | Ca(ICC2/PI489777)SNP_09967 | 888  | A | C | 13 | 4  | Mature    | Leaf |
|            | Ca(ICC2/PI489777)SNP_09968 | 948  | A | G | 11 | 4  | Mature    | Leaf |
| CakTC41550 | Ca(ICC2/PI489777)SNP_09969 | 471  | C | T | 38 | 81 | --        | --   |
| CakTC38864 | Ca(ICC2/PI489777)SNP_09970 | 461  | T | C | 19 | 7  | --        | --   |
|            | Ca(ICC2/PI489777)SNP_09971 | 806  | C | T | 17 | 11 | --        | --   |
| CakTC14821 | Ca(ICC2/PI489777)SNP_09972 | 28   | C | A | 3  | 5  | --        | --   |
| CakTC11372 | Ca(ICC2/PI489777)SNP_09973 | 197  | C | T | 6  | 3  | --        | --   |
| CakTC40315 | Ca(ICC2/PI489777)SNP_09974 | 2029 | G | A | 3  | 5  | --        | --   |
| CakTC32382 | Ca(ICC2/PI489777)SNP_09975 | 310  | A | G | 3  | 4  | --        | --   |
|            | Ca(ICC2/PI489777)SNP_09976 | 611  | A | T | 3  | 7  | --        | --   |
| CakTC26856 | Ca(ICC2/PI489777)SNP_09977 | 400  | G | A | 15 | 3  | Flower    | bud  |
|            | Ca(ICC2/PI489777)SNP_09978 | 470  | C | G | 13 | 5  | Flower    | bud  |
|            | Ca(ICC2/PI489777)SNP_09979 | 488  | A | T | 12 | 6  | Flower    | bud  |
| CakTC27961 | Ca(ICC2/PI489777)SNP_09980 | 178  | G | A | 31 | 12 | --        | --   |
|            | Ca(ICC2/PI489777)SNP_09981 | 311  | T | C | 32 | 15 | --        | --   |
|            | Ca(ICC2/PI489777)SNP_09982 | 650  | C | T | 20 | 9  | --        | --   |
| CakTC39600 | Ca(ICC2/PI489777)SNP_09983 | 413  | T | C | 14 | 12 | --        | --   |
|            | Ca(ICC2/PI489777)SNP_09984 | 659  | C | T | 7  | 3  | --        | --   |
|            | Ca(ICC2/PI489777)SNP_09985 | 917  | G | T | 13 | 6  | --        | --   |

|            |                            |      |   |   |     |    |           |      |
|------------|----------------------------|------|---|---|-----|----|-----------|------|
|            | Ca(ICC2/PI489777)SNP_09986 | 946  | A | G | 11  | 6  | --        | --   |
| CakTC32814 | Ca(ICC2/PI489777)SNP_09987 | 429  | T | G | 8   | 10 | --        | --   |
| CakTC37893 | Ca(ICC2/PI489777)SNP_09988 | 414  | T | C | 32  | 18 | --        | --   |
|            | Ca(ICC2/PI489777)SNP_09989 | 492  | G | A | 27  | 17 | --        | --   |
|            | Ca(ICC2/PI489777)SNP_09990 | 569  | T | C | 19  | 20 | --        | --   |
|            | Ca(ICC2/PI489777)SNP_09991 | 1011 | G | A | 46  | 20 | --        | --   |
|            | Ca(ICC2/PI489777)SNP_09992 | 1065 | C | T | 55  | 28 | --        | --   |
|            | Ca(ICC2/PI489777)SNP_09993 | 1198 | T | C | 48  | 29 | --        | --   |
|            | Ca(ICC2/PI489777)SNP_09994 | 1606 | T | C | 3   | 4  | --        | --   |
| CakTC42536 | Ca(ICC2/PI489777)SNP_09995 | 1699 | G | C | 3   | 4  | --        | --   |
| CakTC38369 | Ca(ICC2/PI489777)SNP_09996 | 1000 | G | A | 7   | 4  | --        | --   |
|            | Ca(ICC2/PI489777)SNP_09997 | 1074 | A | C | 8   | 4  | --        | --   |
|            | Ca(ICC2/PI489777)SNP_09998 | 1075 | G | A | 7   | 4  | --        | --   |
|            | Ca(ICC2/PI489777)SNP_09999 | 1117 | A | T | 7   | 3  | --        | --   |
|            | Ca(ICC2/PI489777)SNP_10000 | 1143 | A | T | 6   | 3  | --        | --   |
| CakTC27629 | Ca(ICC2/PI489777)SNP_10001 | 1009 | A | G | 16  | 11 | --        | --   |
|            | Ca(ICC2/PI489777)SNP_10002 | 2045 | T | C | 7   | 10 | --        | --   |
| CakTC34309 | Ca(ICC2/PI489777)SNP_10003 | 861  | A | G | 27  | 30 | --        | GRAS |
|            | Ca(ICC2/PI489777)SNP_10004 | 1659 | A | G | 44  | 28 | --        | GRAS |
|            | Ca(ICC2/PI489777)SNP_10005 | 1755 | T | G | 72  | 45 | --        | GRAS |
|            | Ca(ICC2/PI489777)SNP_10006 | 1911 | G | T | 70  | 40 | --        | GRAS |
| CakTC34296 | Ca(ICC2/PI489777)SNP_10007 | 731  | C | T | 7   | 7  | --        | --   |
|            | Ca(ICC2/PI489777)SNP_10008 | 1100 | C | T | 4   | 3  | --        | --   |
|            | Ca(ICC2/PI489777)SNP_10009 | 1350 | G | A | 6   | 7  | --        | --   |
| CakTC24136 | Ca(ICC2/PI489777)SNP_10010 | 994  | A | G | 8   | 7  | --        | --   |
|            | Ca(ICC2/PI489777)SNP_10011 | 1645 | T | C | 9   | 10 | --        | --   |
|            | Ca(ICC2/PI489777)SNP_10012 | 1690 | A | T | 9   | 11 | --        | --   |
|            | Ca(ICC2/PI489777)SNP_10013 | 2269 | T | C | 5   | 5  | --        | --   |
| CakTC18976 | Ca(ICC2/PI489777)SNP_10014 | 1944 | A | G | 7   | 4  | --        | --   |
|            | Ca(ICC2/PI489777)SNP_10015 | 1985 | A | G | 7   | 4  | --        | --   |
| CakTC23792 | Ca(ICC2/PI489777)SNP_10016 | 532  | G | A | 19  | 11 | --        | --   |
|            | Ca(ICC2/PI489777)SNP_10017 | 533  | C | A | 19  | 11 | --        | --   |
|            | Ca(ICC2/PI489777)SNP_10018 | 1524 | T | C | 11  | 7  | --        | --   |
|            | Ca(ICC2/PI489777)SNP_10019 | 2011 | T | C | 18  | 5  | --        | --   |
|            | Ca(ICC2/PI489777)SNP_10020 | 2028 | C | T | 17  | 3  | --        | --   |
|            | Ca(ICC2/PI489777)SNP_10021 | 2086 | T | C | 16  | 6  | --        | --   |
|            | Ca(ICC2/PI489777)SNP_10022 | 3371 | A | G | 6   | 3  | --        | --   |
|            | Ca(ICC2/PI489777)SNP_10023 | 3584 | A | G | 3   | 3  | --        | --   |
| CakTC23611 | Ca(ICC2/PI489777)SNP_10024 | 568  | A | G | 6   | 5  | Young_pod | --   |
|            | Ca(ICC2/PI489777)SNP_10025 | 577  | C | G | 6   | 5  | Young_pod | --   |
| CakTC29273 | Ca(ICC2/PI489777)SNP_10026 | 1048 | C | T | 9   | 5  | --        | --   |
| CakTC18498 | Ca(ICC2/PI489777)SNP_10027 | 730  | A | G | 3   | 7  | --        | C2H2 |
|            | Ca(ICC2/PI489777)SNP_10028 | 802  | C | A | 3   | 7  | --        | C2H2 |
|            | Ca(ICC2/PI489777)SNP_10029 | 900  | C | T | 4   | 5  | --        | C2H2 |
|            | Ca(ICC2/PI489777)SNP_10030 | 951  | C | G | 3   | 3  | --        | C2H2 |
|            | Ca(ICC2/PI489777)SNP_10031 | 1014 | A | T | 3   | 3  | --        | C2H2 |
|            | Ca(ICC2/PI489777)SNP_10032 | 1036 | A | G | 3   | 3  | --        | C2H2 |
|            | Ca(ICC2/PI489777)SNP_10033 | 1045 | C | T | 3   | 3  | --        | C2H2 |
|            | Ca(ICC2/PI489777)SNP_10034 | 1081 | C | T | 3   | 3  | --        | C2H2 |
| CakTC42551 | Ca(ICC2/PI489777)SNP_10035 | 353  | T | C | 3   | 8  | --        | --   |
|            | Ca(ICC2/PI489777)SNP_10036 | 742  | C | T | 7   | 12 | --        | --   |
| CakTC27240 | Ca(ICC2/PI489777)SNP_10037 | 2163 | G | T | 24  | 14 | --        | --   |
|            | Ca(ICC2/PI489777)SNP_10038 | 2208 | G | A | 16  | 12 | --        | --   |
|            | Ca(ICC2/PI489777)SNP_10039 | 2244 | T | G | 27  | 10 | --        | --   |
|            | Ca(ICC2/PI489777)SNP_10040 | 2256 | A | G | 27  | 10 | --        | --   |
|            | Ca(ICC2/PI489777)SNP_10041 | 2319 | G | A | 22  | 6  | --        | --   |
|            | Ca(ICC2/PI489777)SNP_10042 | 2352 | C | T | 17  | 3  | --        | --   |
| CakTC29092 | Ca(ICC2/PI489777)SNP_10043 | 784  | T | C | 8   | 4  | --        | --   |
|            | Ca(ICC2/PI489777)SNP_10044 | 960  | T | C | 6   | 4  | --        | --   |
|            | Ca(ICC2/PI489777)SNP_10045 | 1220 | A | T | 3   | 3  | --        | --   |
|            | Ca(ICC2/PI489777)SNP_10046 | 1688 | A | G | 5   | 6  | --        | --   |
|            | Ca(ICC2/PI489777)SNP_10047 | 1777 | A | C | 6   | 5  | --        | --   |
|            | Ca(ICC2/PI489777)SNP_10048 | 2628 | G | C | 7   | 4  | --        | --   |
|            | Ca(ICC2/PI489777)SNP_10049 | 2634 | G | C | 7   | 5  | --        | --   |
| CakTC40453 | Ca(ICC2/PI489777)SNP_10050 | 45   | T | C | 5   | 5  | --        | --   |
|            | Ca(ICC2/PI489777)SNP_10051 | 398  | G | A | 25  | 14 | --        | --   |
|            | Ca(ICC2/PI489777)SNP_10052 | 497  | A | G | 15  | 15 | --        | --   |
|            | Ca(ICC2/PI489777)SNP_10053 | 836  | A | G | 8   | 26 | --        | --   |
|            | Ca(ICC2/PI489777)SNP_10054 | 1376 | G | A | 18  | 8  | --        | --   |
| CakTC35065 | Ca(ICC2/PI489777)SNP_10055 | 1610 | A | G | 13  | 7  | --        | --   |
| CakTC33865 | Ca(ICC2/PI489777)SNP_10056 | 333  | A | T | 143 | 72 | --        | --   |
|            | Ca(ICC2/PI489777)SNP_10057 | 504  | G | A | 41  | 29 | --        | --   |
| CakTC29218 | Ca(ICC2/PI489777)SNP_10058 | 862  | C | T | 4   | 3  | --        | --   |
| CakTC13737 | Ca(ICC2/PI489777)SNP_10059 | 2259 | C | T | 3   | 3  | --        | --   |



|            |                            |      |   |   |     |    |    |      |
|------------|----------------------------|------|---|---|-----|----|----|------|
| CakTC33246 | Ca(ICC2/PI489777)SNP_10060 | 1367 | G | T | 8   | 7  | -- | --   |
|            | Ca(ICC2/PI489777)SNP_10061 | 1419 | A | G | 7   | 5  | -- | --   |
|            | Ca(ICC2/PI489777)SNP_10062 | 1660 | C | G | 4   | 3  | -- | --   |
|            | Ca(ICC2/PI489777)SNP_10063 | 1934 | T | A | 5   | 4  | -- | --   |
| CakTC31575 | Ca(ICC2/PI489777)SNP_10064 | 331  | T | C | 17  | 5  | -- | --   |
|            | Ca(ICC2/PI489777)SNP_10065 | 565  | T | G | 7   | 6  | -- | --   |
|            | Ca(ICC2/PI489777)SNP_10066 | 1179 | A | G | 8   | 10 | -- | --   |
| CakTC10135 | Ca(ICC2/PI489777)SNP_10067 | 1721 | A | G | 26  | 14 | -- | --   |
|            | Ca(ICC2/PI489777)SNP_10068 | 1898 | A | T | 26  | 18 | -- | --   |
| CakTC22788 | Ca(ICC2/PI489777)SNP_10069 | 368  | C | T | 157 | 38 | -- | --   |
|            | Ca(ICC2/PI489777)SNP_10070 | 461  | T | G | 109 | 28 | -- | --   |
|            | Ca(ICC2/PI489777)SNP_10071 | 515  | C | T | 53  | 17 | -- | --   |
| CakTC26913 | Ca(ICC2/PI489777)SNP_10072 | 513  | C | A | 12  | 3  | -- | --   |
|            | Ca(ICC2/PI489777)SNP_10073 | 2278 | A | C | 28  | 13 | -- | --   |
|            | Ca(ICC2/PI489777)SNP_10074 | 2388 | C | T | 30  | 16 | -- | --   |
|            | Ca(ICC2/PI489777)SNP_10075 | 2473 | A | G | 33  | 11 | -- | --   |
|            | Ca(ICC2/PI489777)SNP_10076 | 2742 | C | T | 26  | 12 | -- | --   |
|            | Ca(ICC2/PI489777)SNP_10077 | 2970 | A | G | 22  | 9  | -- | --   |
| CakTC27951 | Ca(ICC2/PI489777)SNP_10078 | 746  | G | A | 26  | 11 | -- | --   |
| CakTC41969 | Ca(ICC2/PI489777)SNP_10079 | 441  | G | T | 11  | 15 | -- | --   |
| CakTC38537 | Ca(ICC2/PI489777)SNP_10080 | 167  | G | A | 27  | 4  | -- | --   |
|            | Ca(ICC2/PI489777)SNP_10081 | 488  | G | A | 47  | 17 | -- | --   |
| CakTC31239 | Ca(ICC2/PI489777)SNP_10082 | 308  | G | A | 5   | 3  | -- | --   |
| CakTC42292 | Ca(ICC2/PI489777)SNP_10083 | 286  | T | A | 15  | 15 | -- | --   |
|            | Ca(ICC2/PI489777)SNP_10084 | 500  | T | C | 3   | 7  | -- | --   |
|            | Ca(ICC2/PI489777)SNP_10085 | 505  | C | A | 3   | 6  | -- | --   |
|            | Ca(ICC2/PI489777)SNP_10086 | 739  | T | C | 4   | 4  | -- | --   |
| CakTC39364 | Ca(ICC2/PI489777)SNP_10087 | 97   | A | G | 6   | 4  | -- | --   |
|            | Ca(ICC2/PI489777)SNP_10088 | 287  | G | A | 70  | 70 | -- | --   |
|            | Ca(ICC2/PI489777)SNP_10089 | 292  | T | C | 73  | 68 | -- | --   |
|            | Ca(ICC2/PI489777)SNP_10090 | 559  | G | A | 65  | 52 | -- | --   |
|            | Ca(ICC2/PI489777)SNP_10091 | 790  | A | C | 70  | 41 | -- | --   |
| CakTC23315 | Ca(ICC2/PI489777)SNP_10092 | 1108 | T | C | 4   | 4  | -- | --   |
|            | Ca(ICC2/PI489777)SNP_10093 | 1150 | C | T | 3   | 4  | -- | --   |
|            | Ca(ICC2/PI489777)SNP_10094 | 1158 | C | A | 3   | 4  | -- | --   |
| CakTC27362 | Ca(ICC2/PI489777)SNP_10095 | 433  | T | C | 10  | 5  | -- | bHLH |
|            | Ca(ICC2/PI489777)SNP_10096 | 724  | C | T | 14  | 4  | -- | bHLH |
|            | Ca(ICC2/PI489777)SNP_10097 | 892  | C | G | 17  | 4  | -- | bHLH |
| CakTC30672 | Ca(ICC2/PI489777)SNP_10098 | 397  | A | G | 9   | 3  | -- | --   |
|            | Ca(ICC2/PI489777)SNP_10099 | 609  | T | C | 6   | 3  | -- | --   |
| CakTC28581 | Ca(ICC2/PI489777)SNP_10100 | 167  | T | C | 9   | 3  | -- | --   |
|            | Ca(ICC2/PI489777)SNP_10101 | 188  | T | A | 13  | 3  | -- | --   |
|            | Ca(ICC2/PI489777)SNP_10102 | 209  | A | C | 14  | 3  | -- | --   |
|            | Ca(ICC2/PI489777)SNP_10103 | 1007 | A | G | 24  | 17 | -- | --   |
|            | Ca(ICC2/PI489777)SNP_10104 | 1565 | C | T | 21  | 21 | -- | --   |
|            | Ca(ICC2/PI489777)SNP_10105 | 1625 | T | G | 14  | 15 | -- | --   |
|            | Ca(ICC2/PI489777)SNP_10106 | 1925 | T | C | 30  | 12 | -- | --   |
|            | Ca(ICC2/PI489777)SNP_10107 | 1961 | G | C | 32  | 13 | -- | --   |
|            | Ca(ICC2/PI489777)SNP_10108 | 2154 | T | G | 34  | 14 | -- | --   |
|            | Ca(ICC2/PI489777)SNP_10109 | 2217 | A | C | 53  | 16 | -- | --   |
|            | Ca(ICC2/PI489777)SNP_10110 | 2243 | G | A | 55  | 16 | -- | --   |
|            | Ca(ICC2/PI489777)SNP_10111 | 3297 | T | C | 3   | 4  | -- | --   |
| CakTC26243 | Ca(ICC2/PI489777)SNP_10112 | 1300 | G | C | 9   | 9  | -- | --   |
| CakTC30450 | Ca(ICC2/PI489777)SNP_10113 | 381  | T | C | 18  | 4  | -- | --   |
|            | Ca(ICC2/PI489777)SNP_10114 | 432  | T | G | 18  | 5  | -- | --   |
|            | Ca(ICC2/PI489777)SNP_10115 | 510  | C | T | 16  | 4  | -- | --   |
|            | Ca(ICC2/PI489777)SNP_10116 | 769  | C | G | 20  | 4  | -- | --   |
|            | Ca(ICC2/PI489777)SNP_10117 | 1693 | A | C | 6   | 4  | -- | --   |
| CakTC00369 | Ca(ICC2/PI489777)SNP_10118 | 517  | G | A | 5   | 3  | -- | --   |
| CakTC38984 | Ca(ICC2/PI489777)SNP_10119 | 141  | G | T | 9   | 3  | -- | Tify |
|            | Ca(ICC2/PI489777)SNP_10120 | 599  | C | T | 9   | 4  | -- | Tify |
|            | Ca(ICC2/PI489777)SNP_10121 | 631  | G | T | 9   | 3  | -- | Tify |
|            | Ca(ICC2/PI489777)SNP_10122 | 718  | T | C | 4   | 3  | -- | Tify |
| CakTC28466 | Ca(ICC2/PI489777)SNP_10123 | 346  | G | A | 4   | 4  | -- | --   |
| CakTC38996 | Ca(ICC2/PI489777)SNP_10124 | 252  | A | G | 6   | 9  | -- | --   |
|            | Ca(ICC2/PI489777)SNP_10125 | 809  | G | T | 9   | 9  | -- | --   |
|            | Ca(ICC2/PI489777)SNP_10126 | 1259 | G | C | 7   | 9  | -- | --   |
|            | Ca(ICC2/PI489777)SNP_10127 | 1315 | G | A | 5   | 7  | -- | --   |
| CakTC26308 | Ca(ICC2/PI489777)SNP_10128 | 1063 | G | A | 18  | 16 | -- | --   |
|            | Ca(ICC2/PI489777)SNP_10129 | 1336 | T | C | 11  | 9  | -- | --   |
| CakTC42994 | Ca(ICC2/PI489777)SNP_10130 | 695  | G | C | 3   | 21 | -- | --   |
|            | Ca(ICC2/PI489777)SNP_10131 | 1322 | G | A | 3   | 15 | -- | --   |
|            | Ca(ICC2/PI489777)SNP_10132 | 1505 | T | A | 5   | 12 | -- | --   |
|            | Ca(ICC2/PI489777)SNP_10133 | 1901 | G | A | 3   | 12 | -- | --   |

|            |                             |      |   |   |     |     |      |     |
|------------|-----------------------------|------|---|---|-----|-----|------|-----|
| CakTC41442 | Ca(ICCV2/PI489777)SNP_10134 | 629  | T | A | 18  | 23  | --   | --  |
|            | Ca(ICCV2/PI489777)SNP_10135 | 2242 | G | C | 10  | 5   | --   | --  |
| CakTC28016 | Ca(ICCV2/PI489777)SNP_10136 | 58   | A | G | 5   | 10  | --   | --  |
|            | Ca(ICCV2/PI489777)SNP_10137 | 391  | A | T | 13  | 12  | --   | --  |
|            | Ca(ICCV2/PI489777)SNP_10138 | 415  | A | C | 13  | 13  | --   | --  |
|            | Ca(ICCV2/PI489777)SNP_10139 | 1227 | T | C | 13  | 9   | --   | --  |
|            | Ca(ICCV2/PI489777)SNP_10140 | 1707 | A | T | 46  | 7   | --   | --  |
|            | Ca(ICCV2/PI489777)SNP_10141 | 1767 | G | C | 57  | 8   | --   | --  |
|            | Ca(ICCV2/PI489777)SNP_10142 | 1828 | A | C | 56  | 6   | --   | --  |
|            | Ca(ICCV2/PI489777)SNP_10143 | 2139 | G | A | 13  | 8   | --   | --  |
|            | Ca(ICCV2/PI489777)SNP_10144 | 2404 | A | G | 14  | 8   | --   | --  |
|            | Ca(ICCV2/PI489777)SNP_10145 | 2667 | G | C | 12  | 6   | --   | --  |
|            | Ca(ICCV2/PI489777)SNP_10146 | 2692 | G | A | 13  | 5   | --   | --  |
| CakTC34278 | Ca(ICCV2/PI489777)SNP_10147 | 21   | C | A | 3   | 3   | --   | --  |
|            | Ca(ICCV2/PI489777)SNP_10148 | 128  | C | T | 25  | 19  | --   | --  |
| CakTC23041 | Ca(ICCV2/PI489777)SNP_10149 | 117  | G | A | 167 | 138 | --   | --  |
|            | Ca(ICCV2/PI489777)SNP_10150 | 168  | T | C | 243 | 169 | --   | --  |
| CakTC38939 | Ca(ICCV2/PI489777)SNP_10151 | 866  | G | A | 24  | 14  | --   | --  |
| CakTC30946 | Ca(ICCV2/PI489777)SNP_10152 | 291  | C | T | 18  | 5   | --   | --  |
|            | Ca(ICCV2/PI489777)SNP_10153 | 696  | C | T | 8   | 24  | --   | --  |
|            | Ca(ICCV2/PI489777)SNP_10154 | 807  | A | C | 11  | 21  | --   | --  |
|            | Ca(ICCV2/PI489777)SNP_10155 | 1094 | T | C | 9   | 11  | --   | --  |
| CakTC40279 | Ca(ICCV2/PI489777)SNP_10156 | 753  | C | G | 22  | 20  | --   | --  |
| CakTC39254 | Ca(ICCV2/PI489777)SNP_10157 | 67   | T | C | 5   | 3   | --   | --  |
| CakTC09652 | Ca(ICCV2/PI489777)SNP_10158 | 891  | G | T | 15  | 3   | --   | --  |
|            | Ca(ICCV2/PI489777)SNP_10159 | 930  | A | G | 15  | 3   | --   | --  |
|            | Ca(ICCV2/PI489777)SNP_10160 | 2067 | T | G | 12  | 5   | --   | --  |
|            | Ca(ICCV2/PI489777)SNP_10161 | 2163 | A | G | 8   | 5   | --   | --  |
|            | Ca(ICCV2/PI489777)SNP_10162 | 5192 | A | G | 8   | 3   | --   | --  |
| CakTC23875 | Ca(ICCV2/PI489777)SNP_10163 | 452  | C | G | 322 | 85  | --   | --  |
|            | Ca(ICCV2/PI489777)SNP_10164 | 836  | G | A | 288 | 19  | --   | --  |
|            | Ca(ICCV2/PI489777)SNP_10165 | 934  | G | A | 22  | 13  | --   | --  |
| CakTC34623 | Ca(ICCV2/PI489777)SNP_10166 | 108  | G | C | 8   | 3   | --   | --  |
|            | Ca(ICCV2/PI489777)SNP_10167 | 164  | C | T | 8   | 3   | --   | --  |
|            | Ca(ICCV2/PI489777)SNP_10168 | 331  | T | C | 7   | 5   | --   | --  |
|            | Ca(ICCV2/PI489777)SNP_10169 | 341  | G | A | 7   | 5   | --   | --  |
|            | Ca(ICCV2/PI489777)SNP_10170 | 439  | T | A | 4   | 5   | --   | --  |
| CakTC29972 | Ca(ICCV2/PI489777)SNP_10171 | 202  | T | C | 10  | 7   | --   | TPR |
|            | Ca(ICCV2/PI489777)SNP_10172 | 238  | A | G | 10  | 9   | --   | TPR |
|            | Ca(ICCV2/PI489777)SNP_10173 | 362  | G | A | 12  | 9   | --   | TPR |
|            | Ca(ICCV2/PI489777)SNP_10174 | 363  | C | G | 12  | 10  | --   | TPR |
|            | Ca(ICCV2/PI489777)SNP_10175 | 1201 | C | A | 6   | 3   | --   | TPR |
|            | Ca(ICCV2/PI489777)SNP_10176 | 1302 | T | C | 9   | 3   | --   | TPR |
|            | Ca(ICCV2/PI489777)SNP_10177 | 1844 | T | C | 10  | 7   | --   | TPR |
|            | Ca(ICCV2/PI489777)SNP_10178 | 2306 | C | A | 6   | 6   | --   | TPR |
|            | Ca(ICCV2/PI489777)SNP_10179 | 2527 | A | G | 7   | 7   | --   | TPR |
|            | Ca(ICCV2/PI489777)SNP_10180 | 2646 | A | G | 8   | 6   | --   | TPR |
|            | Ca(ICCV2/PI489777)SNP_10181 | 3019 | C | A | 17  | 6   | --   | TPR |
| CakTC28092 | Ca(ICCV2/PI489777)SNP_10182 | 687  | G | T | 12  | 12  | --   | --  |
|            | Ca(ICCV2/PI489777)SNP_10183 | 719  | T | C | 13  | 14  | --   | --  |
|            | Ca(ICCV2/PI489777)SNP_10184 | 891  | G | A | 18  | 11  | --   | --  |
|            | Ca(ICCV2/PI489777)SNP_10185 | 1341 | G | A | 12  | 4   | --   | --  |
|            | Ca(ICCV2/PI489777)SNP_10186 | 1871 | A | C | 60  | 17  | --   | --  |
|            | Ca(ICCV2/PI489777)SNP_10187 | 1946 | T | C | 57  | 14  | --   | --  |
|            | Ca(ICCV2/PI489777)SNP_10188 | 2360 | G | C | 25  | 9   | --   | --  |
| CakTC14618 | Ca(ICCV2/PI489777)SNP_10189 | 619  | C | T | 4   | 3   | --   | --  |
| CakTC32547 | Ca(ICCV2/PI489777)SNP_10190 | 127  | C | G | 43  | 19  | --   | --  |
|            | Ca(ICCV2/PI489777)SNP_10191 | 403  | A | G | 63  | 29  | --   | --  |
|            | Ca(ICCV2/PI489777)SNP_10192 | 1626 | T | C | 74  | 31  | --   | --  |
|            | Ca(ICCV2/PI489777)SNP_10193 | 1800 | T | A | 41  | 21  | --   | --  |
|            | Ca(ICCV2/PI489777)SNP_10194 | 1857 | G | T | 37  | 20  | --   | --  |
| CakTC25704 | Ca(ICCV2/PI489777)SNP_10195 | 1062 | C | T | 3   | 4   | --   | --  |
| CakTC10326 | Ca(ICCV2/PI489777)SNP_10196 | 665  | A | C | 14  | 6   | --   | --  |
|            | Ca(ICCV2/PI489777)SNP_10197 | 683  | T | C | 11  | 7   | --   | --  |
|            | Ca(ICCV2/PI489777)SNP_10198 | 1278 | T | G | 14  | 9   | --   | --  |
| CakTC24753 | Ca(ICCV2/PI489777)SNP_10199 | 266  | C | T | 8   | 6   | --   | --  |
|            | Ca(ICCV2/PI489777)SNP_10200 | 1197 | G | A | 15  | 7   | --   | --  |
| CakTC39314 | Ca(ICCV2/PI489777)SNP_10201 | 759  | C | A | 5   | 6   | --   | --  |
| CakTC24279 | Ca(ICCV2/PI489777)SNP_10202 | 856  | A | G | 40  | 81  | Root | --  |
|            | Ca(ICCV2/PI489777)SNP_10203 | 928  | T | A | 39  | 88  | Root | --  |
|            | Ca(ICCV2/PI489777)SNP_10204 | 1042 | G | A | 38  | 117 | Root | --  |
|            | Ca(ICCV2/PI489777)SNP_10205 | 1145 | A | G | 32  | 102 | Root | --  |
|            | Ca(ICCV2/PI489777)SNP_10206 | 1288 | C | T | 40  | 100 | Root | --  |
|            | Ca(ICCV2/PI489777)SNP_10207 | 1674 | T | C | 8   | 15  | Root | --  |

|            |                            |      |   |   |     |    |    |         |
|------------|----------------------------|------|---|---|-----|----|----|---------|
| CakTC42625 | Ca(ICC2/PI489777)SNP_10208 | 165  | C | A | 141 | 90 | -- | --      |
|            | Ca(ICC2/PI489777)SNP_10209 | 176  | C | T | 143 | 90 | -- | --      |
|            | Ca(ICC2/PI489777)SNP_10210 | 740  | T | C | 8   | 25 | -- | --      |
|            | Ca(ICC2/PI489777)SNP_10211 | 746  | T | A | 8   | 16 | -- | --      |
| CakTC34229 | Ca(ICC2/PI489777)SNP_10212 | 1091 | G | A | 6   | 9  | -- | HB      |
|            | Ca(ICC2/PI489777)SNP_10213 | 1913 | C | T | 16  | 3  | -- | HB      |
|            | Ca(ICC2/PI489777)SNP_10214 | 3170 | T | G | 7   | 13 | -- | HB      |
|            | Ca(ICC2/PI489777)SNP_10215 | 3394 | G | A | 8   | 19 | -- | HB      |
|            | Ca(ICC2/PI489777)SNP_10216 | 3403 | G | T | 7   | 19 | -- | HB      |
|            | Ca(ICC2/PI489777)SNP_10217 | 4031 | A | G | 16  | 4  | -- | HB      |
|            | Ca(ICC2/PI489777)SNP_10218 | 4520 | T | C | 16  | 7  | -- | HB      |
|            | Ca(ICC2/PI489777)SNP_10219 | 5144 | T | C | 18  | 7  | -- | HB      |
|            | Ca(ICC2/PI489777)SNP_10220 | 5186 | C | T | 20  | 6  | -- | HB      |
|            | Ca(ICC2/PI489777)SNP_10221 | 5478 | A | C | 19  | 9  | -- | HB      |
|            | Ca(ICC2/PI489777)SNP_10222 | 5537 | G | T | 19  | 3  | -- | HB      |
|            | Ca(ICC2/PI489777)SNP_10223 | 5632 | T | C | 20  | 4  | -- | HB      |
|            | Ca(ICC2/PI489777)SNP_10224 | 6136 | T | A | 5   | 4  | -- | HB      |
| CakTC38292 | Ca(ICC2/PI489777)SNP_10225 | 228  | A | G | 9   | 4  | -- | --      |
|            | Ca(ICC2/PI489777)SNP_10226 | 524  | G | C | 5   | 3  | -- | --      |
| CakTC37212 | Ca(ICC2/PI489777)SNP_10227 | 153  | C | G | 15  | 9  | -- | --      |
|            | Ca(ICC2/PI489777)SNP_10228 | 462  | C | T | 34  | 11 | -- | --      |
|            | Ca(ICC2/PI489777)SNP_10229 | 672  | A | G | 17  | 10 | -- | --      |
|            | Ca(ICC2/PI489777)SNP_10230 | 1074 | T | A | 22  | 5  | -- | --      |
| CakTC33593 | Ca(ICC2/PI489777)SNP_10231 | 165  | C | T | 4   | 9  | -- | --      |
|            | Ca(ICC2/PI489777)SNP_10232 | 188  | T | A | 4   | 9  | -- | --      |
|            | Ca(ICC2/PI489777)SNP_10233 | 239  | G | C | 4   | 10 | -- | --      |
|            | Ca(ICC2/PI489777)SNP_10234 | 310  | G | C | 4   | 10 | -- | --      |
|            | Ca(ICC2/PI489777)SNP_10235 | 651  | C | G | 23  | 8  | -- | --      |
|            | Ca(ICC2/PI489777)SNP_10236 | 1830 | A | G | 38  | 9  | -- | --      |
|            | Ca(ICC2/PI489777)SNP_10237 | 1989 | A | T | 36  | 12 | -- | --      |
| CakTC29302 | Ca(ICC2/PI489777)SNP_10238 | 341  | G | A | 10  | 11 | -- | --      |
|            | Ca(ICC2/PI489777)SNP_10239 | 689  | A | C | 13  | 7  | -- | --      |
|            | Ca(ICC2/PI489777)SNP_10240 | 928  | G | C | 9   | 3  | -- | --      |
|            | Ca(ICC2/PI489777)SNP_10241 | 1243 | C | G | 17  | 9  | -- | --      |
|            | Ca(ICC2/PI489777)SNP_10242 | 1733 | A | G | 15  | 6  | -- | --      |
|            | Ca(ICC2/PI489777)SNP_10243 | 1835 | C | T | 9   | 9  | -- | --      |
|            | Ca(ICC2/PI489777)SNP_10244 | 1846 | C | T | 8   | 10 | -- | --      |
| CakTC08008 | Ca(ICC2/PI489777)SNP_10245 | 4296 | G | A | 6   | 4  | -- | SET     |
|            | Ca(ICC2/PI489777)SNP_10246 | 4840 | G | A | 3   | 4  | -- | SET     |
|            | Ca(ICC2/PI489777)SNP_10247 | 5402 | A | G | 6   | 4  | -- | SET     |
|            | Ca(ICC2/PI489777)SNP_10248 | 5424 | C | G | 7   | 4  | -- | SET     |
| CakTC43244 | Ca(ICC2/PI489777)SNP_10249 | 193  | G | A | 15  | 10 | -- | ABI3VP1 |
|            | Ca(ICC2/PI489777)SNP_10250 | 316  | G | A | 22  | 10 | -- | ABI3VP1 |
|            | Ca(ICC2/PI489777)SNP_10251 | 667  | T | C | 17  | 16 | -- | ABI3VP1 |
|            | Ca(ICC2/PI489777)SNP_10252 | 1030 | T | C | 18  | 19 | -- | ABI3VP1 |
|            | Ca(ICC2/PI489777)SNP_10253 | 1118 | T | G | 19  | 22 | -- | ABI3VP1 |
|            | Ca(ICC2/PI489777)SNP_10254 | 1120 | A | T | 20  | 22 | -- | ABI3VP1 |
| CakTC37539 | Ca(ICC2/PI489777)SNP_10255 | 505  | A | C | 34  | 22 | -- | --      |
|            | Ca(ICC2/PI489777)SNP_10256 | 1147 | C | T | 12  | 4  | -- | --      |
| CakTC33319 | Ca(ICC2/PI489777)SNP_10257 | 107  | C | A | 16  | 15 | -- | --      |
|            | Ca(ICC2/PI489777)SNP_10258 | 208  | G | A | 26  | 15 | -- | --      |
|            | Ca(ICC2/PI489777)SNP_10259 | 2271 | G | T | 16  | 13 | -- | --      |
| CakTC39251 | Ca(ICC2/PI489777)SNP_10260 | 138  | G | T | 20  | 13 | -- | --      |
|            | Ca(ICC2/PI489777)SNP_10261 | 877  | A | T | 9   | 5  | -- | --      |
|            | Ca(ICC2/PI489777)SNP_10262 | 879  | A | C | 10  | 8  | -- | --      |
|            | Ca(ICC2/PI489777)SNP_10263 | 951  | A | T | 13  | 10 | -- | --      |
|            | Ca(ICC2/PI489777)SNP_10264 | 1013 | T | A | 13  | 9  | -- | --      |
|            | Ca(ICC2/PI489777)SNP_10265 | 1057 | G | A | 14  | 9  | -- | --      |
|            | Ca(ICC2/PI489777)SNP_10266 | 1111 | T | A | 15  | 9  | -- | --      |
|            | Ca(ICC2/PI489777)SNP_10267 | 1234 | C | T | 17  | 7  | -- | --      |
| CakTC32316 | Ca(ICC2/PI489777)SNP_10268 | 148  | T | A | 12  | 4  | -- | --      |
|            | Ca(ICC2/PI489777)SNP_10269 | 149  | C | G | 12  | 4  | -- | --      |
|            | Ca(ICC2/PI489777)SNP_10270 | 188  | G | A | 15  | 4  | -- | --      |
|            | Ca(ICC2/PI489777)SNP_10271 | 259  | T | C | 15  | 5  | -- | --      |
|            | Ca(ICC2/PI489777)SNP_10272 | 421  | C | T | 6   | 15 | -- | --      |
|            | Ca(ICC2/PI489777)SNP_10273 | 427  | T | C | 5   | 16 | -- | --      |
|            | Ca(ICC2/PI489777)SNP_10274 | 646  | C | G | 6   | 18 | -- | --      |
|            | Ca(ICC2/PI489777)SNP_10275 | 668  | G | C | 7   | 19 | -- | --      |
|            | Ca(ICC2/PI489777)SNP_10276 | 865  | A | G | 7   | 4  | -- | --      |
|            | Ca(ICC2/PI489777)SNP_10277 | 1075 | T | C | 3   | 4  | -- | --      |
|            | Ca(ICC2/PI489777)SNP_10278 | 1404 | A | G | 11  | 4  | -- | --      |
| CakTC27567 | Ca(ICC2/PI489777)SNP_10279 | 697  | T | C | 7   | 3  | -- | --      |
| CakTC23350 | Ca(ICC2/PI489777)SNP_10280 | 455  | T | A | 42  | 11 | -- | --      |
|            | Ca(ICC2/PI489777)SNP_10281 | 1145 | T | C | 35  | 3  | -- | --      |

|            |                            |      |   |   |     |     |       |         |
|------------|----------------------------|------|---|---|-----|-----|-------|---------|
|            | Ca(ICC2/PI489777)SNP_10282 | 1151 | G | A | 35  | 4   | --    | --      |
|            | Ca(ICC2/PI489777)SNP_10283 | 2252 | C | G | 21  | 4   | --    | --      |
|            | Ca(ICC2/PI489777)SNP_10284 | 2266 | A | G | 17  | 4   | --    | --      |
| CakTC12242 | Ca(ICC2/PI489777)SNP_10285 | 588  | A | T | 11  | 4   | --    | G2-like |
| CakTC27145 | Ca(ICC2/PI489777)SNP_10286 | 1133 | A | G | 4   | 3   | --    | --      |
|            | Ca(ICC2/PI489777)SNP_10287 | 1155 | G | C | 3   | 3   | --    | --      |
| CakTC39692 | Ca(ICC2/PI489777)SNP_10288 | 399  | C | T | 5   | 10  | --    | --      |
|            | Ca(ICC2/PI489777)SNP_10289 | 689  | C | T | 8   | 9   | --    | --      |
|            | Ca(ICC2/PI489777)SNP_10290 | 1154 | T | C | 23  | 10  | --    | --      |
|            | Ca(ICC2/PI489777)SNP_10291 | 1308 | T | C | 17  | 7   | --    | --      |
|            | Ca(ICC2/PI489777)SNP_10292 | 1440 | A | C | 12  | 5   | --    | --      |
|            | Ca(ICC2/PI489777)SNP_10293 | 1492 | C | G | 12  | 4   | --    | --      |
| CakTC37897 | Ca(ICC2/PI489777)SNP_10294 | 51   | C | A | 3   | 8   | --    | --      |
|            | Ca(ICC2/PI489777)SNP_10295 | 167  | A | C | 7   | 13  | --    | --      |
|            | Ca(ICC2/PI489777)SNP_10296 | 898  | G | A | 41  | 15  | --    | --      |
| CakTC07418 | Ca(ICC2/PI489777)SNP_10297 | 555  | A | T | 4   | 6   | --    | --      |
| CakTC05061 | Ca(ICC2/PI489777)SNP_10298 | 453  | G | A | 5   | 3   | --    | --      |
|            | Ca(ICC2/PI489777)SNP_10299 | 672  | T | C | 3   | 3   | --    | --      |
| CakTC37601 | Ca(ICC2/PI489777)SNP_10300 | 289  | T | C | 9   | 5   | --    | --      |
|            | Ca(ICC2/PI489777)SNP_10301 | 340  | A | G | 11  | 5   | --    | --      |
|            | Ca(ICC2/PI489777)SNP_10302 | 443  | T | C | 11  | 4   | --    | --      |
|            | Ca(ICC2/PI489777)SNP_10303 | 948  | T | C | 19  | 10  | --    | --      |
|            | Ca(ICC2/PI489777)SNP_10304 | 949  | C | T | 18  | 10  | --    | --      |
|            | Ca(ICC2/PI489777)SNP_10305 | 977  | A | G | 11  | 9   | --    | --      |
|            | Ca(ICC2/PI489777)SNP_10306 | 995  | C | A | 10  | 9   | --    | --      |
|            | Ca(ICC2/PI489777)SNP_10307 | 998  | C | T | 8   | 9   | --    | --      |
|            | Ca(ICC2/PI489777)SNP_10308 | 1022 | G | A | 7   | 8   | --    | --      |
|            | Ca(ICC2/PI489777)SNP_10309 | 1103 | A | G | 5   | 7   | --    | --      |
|            | Ca(ICC2/PI489777)SNP_10310 | 1110 | G | T | 5   | 8   | --    | --      |
|            | Ca(ICC2/PI489777)SNP_10311 | 1151 | A | C | 5   | 6   | --    | --      |
|            | Ca(ICC2/PI489777)SNP_10312 | 1178 | C | T | 5   | 5   | --    | --      |
|            | Ca(ICC2/PI489777)SNP_10313 | 1210 | T | G | 4   | 5   | --    | --      |
| CakTC33049 | Ca(ICC2/PI489777)SNP_10314 | 321  | C | G | 5   | 6   | --    | --      |
| CakTC42428 | Ca(ICC2/PI489777)SNP_10315 | 79   | A | G | 4   | 5   | --    | --      |
|            | Ca(ICC2/PI489777)SNP_10316 | 121  | G | A | 3   | 7   | --    | --      |
|            | Ca(ICC2/PI489777)SNP_10317 | 256  | C | T | 4   | 6   | --    | --      |
|            | Ca(ICC2/PI489777)SNP_10318 | 265  | C | T | 3   | 7   | --    | --      |
|            | Ca(ICC2/PI489777)SNP_10319 | 491  | G | C | 3   | 4   | --    | --      |
| CakTC38746 | Ca(ICC2/PI489777)SNP_10320 | 678  | T | C | 3   | 5   | --    | --      |
| CakTC37715 | Ca(ICC2/PI489777)SNP_10321 | 225  | G | A | 7   | 9   | --    | --      |
|            | Ca(ICC2/PI489777)SNP_10322 | 229  | G | A | 7   | 8   | --    | --      |
|            | Ca(ICC2/PI489777)SNP_10323 | 523  | G | A | 3   | 15  | --    | --      |
| CakTC41758 | Ca(ICC2/PI489777)SNP_10324 | 248  | A | C | 4   | 9   | --    | --      |
|            | Ca(ICC2/PI489777)SNP_10325 | 401  | G | T | 6   | 9   | --    | --      |
|            | Ca(ICC2/PI489777)SNP_10326 | 410  | C | T | 6   | 9   | --    | --      |
|            | Ca(ICC2/PI489777)SNP_10327 | 1550 | C | T | 9   | 11  | --    | --      |
|            | Ca(ICC2/PI489777)SNP_10328 | 1553 | A | G | 9   | 11  | --    | --      |
|            | Ca(ICC2/PI489777)SNP_10329 | 1709 | A | G | 15  | 6   | --    | --      |
|            | Ca(ICC2/PI489777)SNP_10330 | 1817 | G | C | 13  | 7   | --    | --      |
|            | Ca(ICC2/PI489777)SNP_10331 | 1946 | A | G | 21  | 7   | --    | --      |
| CakTC24775 | Ca(ICC2/PI489777)SNP_10332 | 7944 | G | A | 745 | 250 | Shoot | --      |
|            | Ca(ICC2/PI489777)SNP_10333 | 7965 | G | C | 740 | 225 | Shoot | --      |
|            | Ca(ICC2/PI489777)SNP_10334 | 7984 | A | G | 621 | 226 | Shoot | --      |
|            | Ca(ICC2/PI489777)SNP_10335 | 8048 | A | G | 563 | 214 | Shoot | --      |
| CakTC38044 | Ca(ICC2/PI489777)SNP_10336 | 669  | G | T | 3   | 3   | --    | --      |
|            | Ca(ICC2/PI489777)SNP_10337 | 1482 | T | C | 4   | 5   | --    | --      |
| CakTC31416 | Ca(ICC2/PI489777)SNP_10338 | 89   | G | C | 5   | 3   | --    | --      |
| CakTC42046 | Ca(ICC2/PI489777)SNP_10339 | 770  | G | A | 19  | 8   | --    | --      |
| CakTC04450 | Ca(ICC2/PI489777)SNP_10340 | 974  | C | T | 11  | 8   | --    | --      |
|            | Ca(ICC2/PI489777)SNP_10341 | 1180 | T | G | 10  | 5   | --    | --      |
|            | Ca(ICC2/PI489777)SNP_10342 | 1182 | G | A | 10  | 5   | --    | --      |
| CakTC25541 | Ca(ICC2/PI489777)SNP_10343 | 1844 | A | C | 12  | 8   | --    | --      |
|            | Ca(ICC2/PI489777)SNP_10344 | 2032 | G | A | 23  | 12  | --    | --      |
| CakTC09633 | Ca(ICC2/PI489777)SNP_10345 | 2001 | A | G | 15  | 17  | --    | --      |
| CakTC09729 | Ca(ICC2/PI489777)SNP_10346 | 441  | A | G | 3   | 3   | --    | --      |
| CakTC42278 | Ca(ICC2/PI489777)SNP_10347 | 323  | A | G | 31  | 15  | --    | --      |
|            | Ca(ICC2/PI489777)SNP_10348 | 569  | A | G | 19  | 9   | --    | --      |
|            | Ca(ICC2/PI489777)SNP_10349 | 1280 | A | G | 20  | 18  | --    | --      |
|            | Ca(ICC2/PI489777)SNP_10350 | 1610 | G | T | 24  | 12  | --    | --      |
| CakTC37902 | Ca(ICC2/PI489777)SNP_10351 | 140  | C | G | 5   | 4   | --    | --      |
|            | Ca(ICC2/PI489777)SNP_10352 | 146  | T | C | 5   | 5   | --    | --      |
|            | Ca(ICC2/PI489777)SNP_10353 | 222  | C | A | 4   | 4   | --    | --      |
|            | Ca(ICC2/PI489777)SNP_10354 | 236  | T | A | 5   | 5   | --    | --      |
|            | Ca(ICC2/PI489777)SNP_10355 | 238  | T | A | 5   | 5   | --    | --      |

|            |                             |      |   |   |     |    |    |    |
|------------|-----------------------------|------|---|---|-----|----|----|----|
|            | Ca(ICCV2/PI489777)SNP_10356 | 558  | G | A | 6   | 6  | -- | -- |
|            | Ca(ICCV2/PI489777)SNP_10357 | 1158 | A | G | 3   | 4  | -- | -- |
|            | Ca(ICCV2/PI489777)SNP_10358 | 1464 | G | A | 7   | 4  | -- | -- |
| CakTC12632 | Ca(ICCV2/PI489777)SNP_10359 | 113  | G | T | 10  | 12 | -- | -- |
|            | Ca(ICCV2/PI489777)SNP_10360 | 322  | T | C | 14  | 17 | -- | -- |
|            | Ca(ICCV2/PI489777)SNP_10361 | 517  | T | G | 8   | 13 | -- | -- |
|            | Ca(ICCV2/PI489777)SNP_10362 | 677  | G | A | 7   | 6  | -- | -- |
| CakTC26682 | Ca(ICCV2/PI489777)SNP_10363 | 562  | C | T | 3   | 5  | -- | -- |
|            | Ca(ICCV2/PI489777)SNP_10364 | 573  | C | A | 3   | 4  | -- | -- |
|            | Ca(ICCV2/PI489777)SNP_10365 | 1925 | T | C | 5   | 6  | -- | -- |
|            | Ca(ICCV2/PI489777)SNP_10366 | 2038 | T | C | 3   | 7  | -- | -- |
|            | Ca(ICCV2/PI489777)SNP_10367 | 2043 | C | T | 3   | 7  | -- | -- |
| CakTC09702 | Ca(ICCV2/PI489777)SNP_10368 | 68   | C | T | 29  | 11 | -- | -- |
|            | Ca(ICCV2/PI489777)SNP_10369 | 74   | C | T | 29  | 10 | -- | -- |
|            | Ca(ICCV2/PI489777)SNP_10370 | 149  | T | C | 32  | 13 | -- | -- |
|            | Ca(ICCV2/PI489777)SNP_10371 | 158  | A | C | 32  | 13 | -- | -- |
|            | Ca(ICCV2/PI489777)SNP_10372 | 164  | T | A | 32  | 13 | -- | -- |
|            | Ca(ICCV2/PI489777)SNP_10373 | 405  | C | A | 15  | 11 | -- | -- |
| CakTC27444 | Ca(ICCV2/PI489777)SNP_10374 | 523  | A | G | 5   | 5  | -- | -- |
|            | Ca(ICCV2/PI489777)SNP_10375 | 738  | A | G | 5   | 6  | -- | -- |
| CakTC34753 | Ca(ICCV2/PI489777)SNP_10376 | 206  | A | C | 21  | 10 | -- | -- |
|            | Ca(ICCV2/PI489777)SNP_10377 | 1225 | A | G | 29  | 12 | -- | -- |
|            | Ca(ICCV2/PI489777)SNP_10378 | 3244 | G | A | 15  | 11 | -- | -- |
| CakTC37824 | Ca(ICCV2/PI489777)SNP_10379 | 122  | T | C | 6   | 4  | -- | -- |
|            | Ca(ICCV2/PI489777)SNP_10380 | 189  | A | G | 7   | 4  | -- | -- |
|            | Ca(ICCV2/PI489777)SNP_10381 | 264  | T | C | 9   | 4  | -- | -- |
|            | Ca(ICCV2/PI489777)SNP_10382 | 300  | C | T | 9   | 5  | -- | -- |
| CakTC34086 | Ca(ICCV2/PI489777)SNP_10383 | 735  | C | T | 5   | 5  | -- | -- |
|            | Ca(ICCV2/PI489777)SNP_10384 | 1530 | A | C | 45  | 26 | -- | -- |
|            | Ca(ICCV2/PI489777)SNP_10385 | 1852 | C | T | 10  | 5  | -- | -- |
| CakTC31957 | Ca(ICCV2/PI489777)SNP_10386 | 516  | T | C | 48  | 18 | -- | -- |
|            | Ca(ICCV2/PI489777)SNP_10387 | 562  | G | T | 56  | 26 | -- | -- |
| CakTC04069 | Ca(ICCV2/PI489777)SNP_10388 | 770  | G | A | 12  | 8  | -- | -- |
|            | Ca(ICCV2/PI489777)SNP_10389 | 1070 | G | A | 14  | 10 | -- | -- |
| CakTC23147 | Ca(ICCV2/PI489777)SNP_10390 | 537  | C | T | 19  | 12 | -- | -- |
|            | Ca(ICCV2/PI489777)SNP_10391 | 1295 | T | A | 7   | 9  | -- | -- |
| CakTC28594 | Ca(ICCV2/PI489777)SNP_10392 | 58   | T | A | 12  | 9  | -- | -- |
| CakTC23282 | Ca(ICCV2/PI489777)SNP_10393 | 188  | C | G | 5   | 6  | -- | -- |
| CakTC39798 | Ca(ICCV2/PI489777)SNP_10394 | 215  | T | C | 12  | 13 | -- | -- |
|            | Ca(ICCV2/PI489777)SNP_10395 | 705  | G | A | 75  | 39 | -- | -- |
|            | Ca(ICCV2/PI489777)SNP_10396 | 720  | C | G | 76  | 34 | -- | -- |
|            | Ca(ICCV2/PI489777)SNP_10397 | 822  | A | G | 107 | 44 | -- | -- |
| CakTC02339 | Ca(ICCV2/PI489777)SNP_10398 | 467  | C | A | 4   | 4  | -- | -- |
|            | Ca(ICCV2/PI489777)SNP_10399 | 793  | A | G | 10  | 4  | -- | -- |
|            | Ca(ICCV2/PI489777)SNP_10400 | 907  | A | C | 6   | 7  | -- | -- |
|            | Ca(ICCV2/PI489777)SNP_10401 | 936  | A | G | 6   | 7  | -- | -- |
|            | Ca(ICCV2/PI489777)SNP_10402 | 1043 | G | T | 6   | 4  | -- | -- |
| CakTC41451 | Ca(ICCV2/PI489777)SNP_10403 | 1043 | C | T | 21  | 11 | -- | -- |
|            | Ca(ICCV2/PI489777)SNP_10404 | 1103 | G | A | 20  | 8  | -- | -- |
|            | Ca(ICCV2/PI489777)SNP_10405 | 1355 | T | C | 32  | 12 | -- | -- |
|            | Ca(ICCV2/PI489777)SNP_10406 | 1417 | G | A | 36  | 14 | -- | -- |
| CakTC34599 | Ca(ICCV2/PI489777)SNP_10407 | 587  | T | C | 24  | 18 | -- | -- |
| CakTC38450 | Ca(ICCV2/PI489777)SNP_10408 | 241  | T | C | 3   | 3  | -- | -- |
|            | Ca(ICCV2/PI489777)SNP_10409 | 345  | A | G | 4   | 3  | -- | -- |
| CakTC25057 | Ca(ICCV2/PI489777)SNP_10410 | 928  | T | C | 24  | 6  | -- | -- |
| CakTC32017 | Ca(ICCV2/PI489777)SNP_10411 | 951  | G | A | 6   | 3  | -- | -- |
|            | Ca(ICCV2/PI489777)SNP_10412 | 991  | T | C | 6   | 3  | -- | -- |
|            | Ca(ICCV2/PI489777)SNP_10413 | 1278 | T | C | 6   | 5  | -- | -- |
|            | Ca(ICCV2/PI489777)SNP_10414 | 1979 | T | C | 6   | 10 | -- | -- |
|            | Ca(ICCV2/PI489777)SNP_10415 | 2192 | T | A | 6   | 9  | -- | -- |
|            | Ca(ICCV2/PI489777)SNP_10416 | 2241 | G | A | 6   | 8  | -- | -- |
| CakTC27277 | Ca(ICCV2/PI489777)SNP_10417 | 503  | G | A | 14  | 20 | -- | -- |
|            | Ca(ICCV2/PI489777)SNP_10418 | 559  | G | C | 21  | 18 | -- | -- |
|            | Ca(ICCV2/PI489777)SNP_10419 | 808  | G | T | 29  | 10 | -- | -- |
|            | Ca(ICCV2/PI489777)SNP_10420 | 935  | G | A | 36  | 18 | -- | -- |
| CakTC15503 | Ca(ICCV2/PI489777)SNP_10421 | 1054 | T | G | 117 | 33 | -- | -- |
| CakTC28554 | Ca(ICCV2/PI489777)SNP_10422 | 229  | A | G | 6   | 4  | -- | -- |
|            | Ca(ICCV2/PI489777)SNP_10423 | 247  | G | A | 6   | 4  | -- | -- |
|            | Ca(ICCV2/PI489777)SNP_10424 | 310  | C | A | 6   | 4  | -- | -- |
|            | Ca(ICCV2/PI489777)SNP_10425 | 397  | G | T | 7   | 5  | -- | -- |
|            | Ca(ICCV2/PI489777)SNP_10426 | 406  | G | A | 7   | 4  | -- | -- |
|            | Ca(ICCV2/PI489777)SNP_10427 | 502  | C | G | 7   | 3  | -- | -- |
|            | Ca(ICCV2/PI489777)SNP_10428 | 1165 | T | C | 4   | 3  | -- | -- |
| CakTC31281 | Ca(ICCV2/PI489777)SNP_10429 | 596  | C | G | 7   | 4  | -- | -- |

|            |                             |      |   |   |    |    |    |    |
|------------|-----------------------------|------|---|---|----|----|----|----|
|            | Ca(ICCV2/PI489777)SNP_10430 | 657  | G | A | 5  | 4  | -- | -- |
| CakTC39840 | Ca(ICCV2/PI489777)SNP_10431 | 397  | C | A | 4  | 3  | -- | -- |
|            | Ca(ICCV2/PI489777)SNP_10432 | 456  | C | T | 12 | 3  | -- | -- |
| CakTC34836 | Ca(ICCV2/PI489777)SNP_10433 | 144  | T | C | 10 | 9  | -- | -- |
|            | Ca(ICCV2/PI489777)SNP_10434 | 189  | C | T | 10 | 8  | -- | -- |
|            | Ca(ICCV2/PI489777)SNP_10435 | 263  | T | C | 10 | 10 | -- | -- |
| CakTC23736 | Ca(ICCV2/PI489777)SNP_10436 | 199  | G | T | 4  | 3  | -- | -- |
|            | Ca(ICCV2/PI489777)SNP_10437 | 394  | G | A | 36 | 27 | -- | -- |
|            | Ca(ICCV2/PI489777)SNP_10438 | 759  | A | G | 11 | 3  | -- | -- |
|            | Ca(ICCV2/PI489777)SNP_10439 | 1067 | A | G | 24 | 8  | -- | -- |
| CakTC43123 | Ca(ICCV2/PI489777)SNP_10440 | 1596 | G | T | 13 | 29 | -- | -- |
|            | Ca(ICCV2/PI489777)SNP_10441 | 1851 | C | T | 3  | 7  | -- | -- |
| CakTC18041 | Ca(ICCV2/PI489777)SNP_10442 | 1506 | G | A | 3  | 5  | -- | -- |
|            | Ca(ICCV2/PI489777)SNP_10443 | 2040 | T | C | 3  | 5  | -- | -- |
| CakTC25149 | Ca(ICCV2/PI489777)SNP_10444 | 486  | A | G | 14 | 7  | -- | -- |
|            | Ca(ICCV2/PI489777)SNP_10445 | 504  | T | C | 18 | 6  | -- | -- |
|            | Ca(ICCV2/PI489777)SNP_10446 | 546  | G | C | 21 | 10 | -- | -- |
|            | Ca(ICCV2/PI489777)SNP_10447 | 684  | G | A | 40 | 9  | -- | -- |
|            | Ca(ICCV2/PI489777)SNP_10448 | 720  | T | C | 48 | 12 | -- | -- |
|            | Ca(ICCV2/PI489777)SNP_10449 | 759  | A | C | 58 | 14 | -- | -- |
|            | Ca(ICCV2/PI489777)SNP_10450 | 812  | A | C | 57 | 15 | -- | -- |
|            | Ca(ICCV2/PI489777)SNP_10451 | 888  | T | C | 40 | 13 | -- | -- |
| CakTC28206 | Ca(ICCV2/PI489777)SNP_10452 | 460  | A | T | 16 | 12 | -- | -- |
|            | Ca(ICCV2/PI489777)SNP_10453 | 1252 | T | C | 11 | 6  | -- | -- |
| CakTC40643 | Ca(ICCV2/PI489777)SNP_10454 | 242  | C | G | 3  | 10 | -- | -- |
|            | Ca(ICCV2/PI489777)SNP_10455 | 633  | G | A | 9  | 9  | -- | -- |
| CakTC31641 | Ca(ICCV2/PI489777)SNP_10456 | 137  | T | C | 4  | 6  | -- | -- |
|            | Ca(ICCV2/PI489777)SNP_10457 | 165  | C | A | 4  | 6  | -- | -- |
|            | Ca(ICCV2/PI489777)SNP_10458 | 489  | C | T | 11 | 3  | -- | -- |
| CakTC40870 | Ca(ICCV2/PI489777)SNP_10459 | 569  | G | A | 3  | 3  | -- | -- |
|            | Ca(ICCV2/PI489777)SNP_10460 | 1310 | A | T | 3  | 5  | -- | -- |
|            | Ca(ICCV2/PI489777)SNP_10461 | 1415 | A | G | 3  | 4  | -- | -- |
| CakTC39816 | Ca(ICCV2/PI489777)SNP_10462 | 279  | A | T | 8  | 4  | -- | -- |
|            | Ca(ICCV2/PI489777)SNP_10463 | 420  | G | C | 10 | 4  | -- | -- |
|            | Ca(ICCV2/PI489777)SNP_10464 | 1116 | G | A | 9  | 4  | -- | -- |
|            | Ca(ICCV2/PI489777)SNP_10465 | 1124 | C | T | 11 | 4  | -- | -- |
|            | Ca(ICCV2/PI489777)SNP_10466 | 1158 | A | C | 4  | 5  | -- | -- |
|            | Ca(ICCV2/PI489777)SNP_10467 | 1449 | T | C | 7  | 3  | -- | -- |
|            | Ca(ICCV2/PI489777)SNP_10468 | 1467 | T | A | 7  | 3  | -- | -- |
| CakTC08111 | Ca(ICCV2/PI489777)SNP_10469 | 454  | T | C | 3  | 3  | -- | -- |
| CakTC35963 | Ca(ICCV2/PI489777)SNP_10470 | 248  | A | T | 4  | 4  | -- | -- |
|            | Ca(ICCV2/PI489777)SNP_10471 | 823  | T | C | 9  | 3  | -- | -- |
| CakTC11591 | Ca(ICCV2/PI489777)SNP_10472 | 705  | A | C | 14 | 14 | -- | -- |
|            | Ca(ICCV2/PI489777)SNP_10473 | 880  | C | A | 7  | 3  | -- | -- |
| CakTC32334 | Ca(ICCV2/PI489777)SNP_10474 | 1344 | T | G | 7  | 13 | -- | -- |
| CakTC36495 | Ca(ICCV2/PI489777)SNP_10475 | 315  | G | A | 8  | 4  | -- | -- |
|            | Ca(ICCV2/PI489777)SNP_10476 | 361  | T | G | 7  | 5  | -- | -- |
|            | Ca(ICCV2/PI489777)SNP_10477 | 813  | C | T | 4  | 7  | -- | -- |
|            | Ca(ICCV2/PI489777)SNP_10478 | 1360 | T | C | 6  | 4  | -- | -- |
| CakTC23539 | Ca(ICCV2/PI489777)SNP_10479 | 133  | G | C | 7  | 10 | -- | -- |
|            | Ca(ICCV2/PI489777)SNP_10480 | 144  | C | T | 7  | 10 | -- | -- |
|            | Ca(ICCV2/PI489777)SNP_10481 | 328  | A | C | 11 | 11 | -- | -- |
|            | Ca(ICCV2/PI489777)SNP_10482 | 416  | T | C | 8  | 7  | -- | -- |
| CakTC23618 | Ca(ICCV2/PI489777)SNP_10483 | 1067 | G | A | 29 | 17 | -- | -- |
|            | Ca(ICCV2/PI489777)SNP_10484 | 1706 | G | A | 50 | 16 | -- | -- |
|            | Ca(ICCV2/PI489777)SNP_10485 | 2132 | G | A | 33 | 25 | -- | -- |
|            | Ca(ICCV2/PI489777)SNP_10486 | 2490 | G | A | 7  | 6  | -- | -- |
| CakTC38942 | Ca(ICCV2/PI489777)SNP_10487 | 386  | T | C | 11 | 6  | -- | -- |
|            | Ca(ICCV2/PI489777)SNP_10488 | 416  | T | G | 12 | 6  | -- | -- |
|            | Ca(ICCV2/PI489777)SNP_10489 | 470  | C | T | 12 | 5  | -- | -- |
|            | Ca(ICCV2/PI489777)SNP_10490 | 479  | G | A | 11 | 8  | -- | -- |
|            | Ca(ICCV2/PI489777)SNP_10491 | 545  | C | G | 10 | 7  | -- | -- |
|            | Ca(ICCV2/PI489777)SNP_10492 | 596  | T | C | 12 | 7  | -- | -- |
|            | Ca(ICCV2/PI489777)SNP_10493 | 1049 | T | C | 8  | 6  | -- | -- |
|            | Ca(ICCV2/PI489777)SNP_10494 | 1298 | A | G | 10 | 6  | -- | -- |
|            | Ca(ICCV2/PI489777)SNP_10495 | 1457 | G | C | 5  | 7  | -- | -- |
|            | Ca(ICCV2/PI489777)SNP_10496 | 1517 | C | T | 3  | 6  | -- | -- |
| CakTC38404 | Ca(ICCV2/PI489777)SNP_10497 | 997  | C | G | 54 | 13 | -- | -- |
| CakTC08662 | Ca(ICCV2/PI489777)SNP_10498 | 1094 | G | A | 4  | 10 | -- | -- |
| CakTC30271 | Ca(ICCV2/PI489777)SNP_10499 | 488  | C | T | 19 | 9  | -- | -- |
|            | Ca(ICCV2/PI489777)SNP_10500 | 584  | C | G | 17 | 6  | -- | -- |
|            | Ca(ICCV2/PI489777)SNP_10501 | 630  | T | C | 10 | 4  | -- | -- |
| CakTC35589 | Ca(ICCV2/PI489777)SNP_10502 | 114  | C | T | 11 | 9  | -- | -- |
|            | Ca(ICCV2/PI489777)SNP_10503 | 513  | G | T | 23 | 9  | -- | -- |

|            |                            |      |   |   |    |    |      |          |
|------------|----------------------------|------|---|---|----|----|------|----------|
|            | Ca(ICC2/PI489777)SNP_10504 | 588  | C | T | 19 | 10 | --   | --       |
|            | Ca(ICC2/PI489777)SNP_10505 | 609  | A | G | 21 | 12 | --   | --       |
|            | Ca(ICC2/PI489777)SNP_10506 | 1863 | C | T | 46 | 42 | --   | --       |
|            | Ca(ICC2/PI489777)SNP_10507 | 2395 | A | C | 48 | 42 | --   | --       |
| CakTC33879 | Ca(ICC2/PI489777)SNP_10508 | 326  | C | T | 9  | 8  | --   | --       |
|            | Ca(ICC2/PI489777)SNP_10509 | 480  | T | C | 11 | 7  | --   | --       |
|            | Ca(ICC2/PI489777)SNP_10510 | 481  | G | A | 11 | 7  | --   | --       |
|            | Ca(ICC2/PI489777)SNP_10511 | 495  | A | G | 11 | 6  | --   | --       |
|            | Ca(ICC2/PI489777)SNP_10512 | 906  | G | T | 7  | 3  | --   | --       |
|            | Ca(ICC2/PI489777)SNP_10513 | 954  | C | T | 8  | 5  | --   | --       |
|            | Ca(ICC2/PI489777)SNP_10514 | 999  | G | A | 9  | 5  | --   | --       |
| CakTC27877 | Ca(ICC2/PI489777)SNP_10515 | 523  | A | G | 13 | 4  | Root | --       |
|            | Ca(ICC2/PI489777)SNP_10516 | 1054 | G | A | 14 | 3  | Root | --       |
|            | Ca(ICC2/PI489777)SNP_10517 | 1125 | A | T | 14 | 4  | Root | --       |
| CakTC34857 | Ca(ICC2/PI489777)SNP_10518 | 292  | C | T | 38 | 17 | --   | --       |
|            | Ca(ICC2/PI489777)SNP_10519 | 425  | T | C | 47 | 26 | --   | --       |
|            | Ca(ICC2/PI489777)SNP_10520 | 440  | A | C | 46 | 29 | --   | --       |
|            | Ca(ICC2/PI489777)SNP_10521 | 454  | G | C | 47 | 25 | --   | --       |
|            | Ca(ICC2/PI489777)SNP_10522 | 484  | G | A | 48 | 28 | --   | --       |
|            | Ca(ICC2/PI489777)SNP_10523 | 1483 | G | A | 42 | 21 | --   | --       |
| CakTC25781 | Ca(ICC2/PI489777)SNP_10524 | 1389 | C | T | 9  | 3  | --   | --       |
|            | Ca(ICC2/PI489777)SNP_10525 | 1502 | C | G | 6  | 11 | --   | --       |
|            | Ca(ICC2/PI489777)SNP_10526 | 1607 | T | C | 6  | 13 | --   | --       |
|            | Ca(ICC2/PI489777)SNP_10527 | 1632 | G | A | 10 | 14 | --   | --       |
|            | Ca(ICC2/PI489777)SNP_10528 | 1665 | G | A | 12 | 11 | --   | --       |
|            | Ca(ICC2/PI489777)SNP_10529 | 1741 | A | C | 14 | 9  | --   | --       |
|            | Ca(ICC2/PI489777)SNP_10530 | 1766 | G | C | 11 | 5  | --   | --       |
|            | Ca(ICC2/PI489777)SNP_10531 | 1781 | C | G | 14 | 6  | --   | --       |
|            | Ca(ICC2/PI489777)SNP_10532 | 1869 | C | T | 11 | 4  | --   | --       |
|            | Ca(ICC2/PI489777)SNP_10533 | 1904 | A | T | 11 | 3  | --   | --       |
|            | Ca(ICC2/PI489777)SNP_10534 | 1915 | G | A | 10 | 3  | --   | --       |
|            | Ca(ICC2/PI489777)SNP_10535 | 1948 | T | C | 10 | 3  | --   | --       |
| CakTC16142 | Ca(ICC2/PI489777)SNP_10536 | 1482 | A | T | 20 | 17 | --   | AUX/IAA  |
| CakTC41598 | Ca(ICC2/PI489777)SNP_10537 | 692  | C | T | 34 | 16 | --   | Trihelix |
|            | Ca(ICC2/PI489777)SNP_10538 | 701  | T | C | 29 | 17 | --   | Trihelix |
|            | Ca(ICC2/PI489777)SNP_10539 | 710  | A | G | 27 | 17 | --   | Trihelix |
|            | Ca(ICC2/PI489777)SNP_10540 | 1632 | T | G | 29 | 8  | --   | Trihelix |
|            | Ca(ICC2/PI489777)SNP_10541 | 1805 | T | C | 28 | 8  | --   | Trihelix |
|            | Ca(ICC2/PI489777)SNP_10542 | 2381 | A | G | 11 | 9  | --   | Trihelix |
| CakTC39510 | Ca(ICC2/PI489777)SNP_10543 | 714  | G | A | 35 | 48 | --   | --       |
|            | Ca(ICC2/PI489777)SNP_10544 | 725  | T | C | 31 | 47 | --   | --       |
|            | Ca(ICC2/PI489777)SNP_10545 | 741  | G | A | 36 | 35 | --   | --       |
| CakTC34568 | Ca(ICC2/PI489777)SNP_10546 | 563  | C | T | 9  | 7  | --   | --       |
|            | Ca(ICC2/PI489777)SNP_10547 | 722  | G | A | 6  | 15 | --   | --       |
|            | Ca(ICC2/PI489777)SNP_10548 | 959  | G | A | 6  | 14 | --   | --       |
|            | Ca(ICC2/PI489777)SNP_10549 | 1565 | G | C | 6  | 7  | --   | --       |
|            | Ca(ICC2/PI489777)SNP_10550 | 1974 | T | C | 5  | 3  | --   | --       |
| CakTC28522 | Ca(ICC2/PI489777)SNP_10551 | 547  | T | G | 39 | 11 | --   | MYB      |
|            | Ca(ICC2/PI489777)SNP_10552 | 645  | C | G | 35 | 10 | --   | MYB      |
|            | Ca(ICC2/PI489777)SNP_10553 | 648  | C | G | 33 | 12 | --   | MYB      |
|            | Ca(ICC2/PI489777)SNP_10554 | 797  | G | A | 16 | 10 | --   | MYB      |
|            | Ca(ICC2/PI489777)SNP_10555 | 893  | A | G | 14 | 7  | --   | MYB      |
| CakTC22757 | Ca(ICC2/PI489777)SNP_10556 | 345  | T | C | 12 | 3  | --   | --       |
|            | Ca(ICC2/PI489777)SNP_10557 | 355  | A | T | 10 | 3  | --   | --       |
|            | Ca(ICC2/PI489777)SNP_10558 | 379  | G | A | 17 | 3  | --   | --       |
| CakTC33274 | Ca(ICC2/PI489777)SNP_10559 | 1489 | A | G | 9  | 10 | --   | --       |
|            | Ca(ICC2/PI489777)SNP_10560 | 1849 | C | T | 9  | 5  | --   | --       |
|            | Ca(ICC2/PI489777)SNP_10561 | 1918 | A | C | 9  | 10 | --   | --       |
|            | Ca(ICC2/PI489777)SNP_10562 | 2002 | C | T | 7  | 10 | --   | --       |
| CakTC37756 | Ca(ICC2/PI489777)SNP_10563 | 901  | G | A | 28 | 14 | --   | --       |
| CakTC42102 | Ca(ICC2/PI489777)SNP_10564 | 104  | A | G | 4  | 3  | --   | --       |
|            | Ca(ICC2/PI489777)SNP_10565 | 312  | C | T | 9  | 6  | --   | --       |
|            | Ca(ICC2/PI489777)SNP_10566 | 349  | G | A | 10 | 4  | --   | --       |
|            | Ca(ICC2/PI489777)SNP_10567 | 378  | A | G | 12 | 4  | --   | --       |
|            | Ca(ICC2/PI489777)SNP_10568 | 555  | C | A | 17 | 6  | --   | --       |
|            | Ca(ICC2/PI489777)SNP_10569 | 828  | C | T | 13 | 7  | --   | --       |
|            | Ca(ICC2/PI489777)SNP_10570 | 1104 | T | C | 12 | 5  | --   | --       |
|            | Ca(ICC2/PI489777)SNP_10571 | 1672 | G | A | 9  | 6  | --   | --       |
|            | Ca(ICC2/PI489777)SNP_10572 | 1685 | C | T | 8  | 6  | --   | --       |
| CakTC15679 | Ca(ICC2/PI489777)SNP_10573 | 81   | T | C | 11 | 3  | --   | --       |
|            | Ca(ICC2/PI489777)SNP_10574 | 100  | G | A | 17 | 4  | --   | --       |
|            | Ca(ICC2/PI489777)SNP_10575 | 285  | C | T | 17 | 7  | --   | --       |
|            | Ca(ICC2/PI489777)SNP_10576 | 300  | C | G | 17 | 7  | --   | --       |
|            | Ca(ICC2/PI489777)SNP_10577 | 636  | A | G | 20 | 9  | --   | --       |

|            |                            |      |   |   |     |     |    |      |
|------------|----------------------------|------|---|---|-----|-----|----|------|
|            | Ca(ICC2/PI489777)SNP_10578 | 813  | C | G | 18  | 6   | -- | --   |
|            | Ca(ICC2/PI489777)SNP_10579 | 864  | C | A | 15  | 5   | -- | --   |
|            | Ca(ICC2/PI489777)SNP_10580 | 918  | T | G | 14  | 4   | -- | --   |
|            | Ca(ICC2/PI489777)SNP_10581 | 957  | T | C | 11  | 4   | -- | --   |
| CakTC35644 | Ca(ICC2/PI489777)SNP_10582 | 602  | A | G | 18  | 4   | -- | --   |
|            | Ca(ICC2/PI489777)SNP_10583 | 832  | T | C | 15  | 6   | -- | --   |
|            | Ca(ICC2/PI489777)SNP_10584 | 1045 | G | T | 17  | 13  | -- | --   |
|            | Ca(ICC2/PI489777)SNP_10585 | 1240 | T | C | 31  | 11  | -- | --   |
|            | Ca(ICC2/PI489777)SNP_10586 | 2168 | C | G | 15  | 8   | -- | --   |
|            | Ca(ICC2/PI489777)SNP_10587 | 2235 | T | C | 11  | 11  | -- | --   |
|            | Ca(ICC2/PI489777)SNP_10588 | 2251 | T | C | 12  | 10  | -- | --   |
|            | Ca(ICC2/PI489777)SNP_10589 | 2320 | A | G | 11  | 13  | -- | --   |
|            | Ca(ICC2/PI489777)SNP_10590 | 2602 | C | G | 18  | 20  | -- | --   |
|            | Ca(ICC2/PI489777)SNP_10591 | 2620 | C | T | 20  | 20  | -- | --   |
|            | Ca(ICC2/PI489777)SNP_10592 | 2702 | A | G | 17  | 17  | -- | --   |
| CakTC26811 | Ca(ICC2/PI489777)SNP_10593 | 744  | G | A | 16  | 5   | -- | --   |
|            | Ca(ICC2/PI489777)SNP_10594 | 1347 | T | C | 7   | 13  | -- | --   |
|            | Ca(ICC2/PI489777)SNP_10595 | 1450 | A | G | 12  | 13  | -- | --   |
|            | Ca(ICC2/PI489777)SNP_10596 | 1806 | T | G | 15  | 5   | -- | --   |
|            | Ca(ICC2/PI489777)SNP_10597 | 2052 | A | T | 13  | 11  | -- | --   |
| CakTC38892 | Ca(ICC2/PI489777)SNP_10598 | 198  | C | A | 4   | 3   | -- | --   |
| CakTC10926 | Ca(ICC2/PI489777)SNP_10599 | 325  | A | G | 15  | 4   | -- | GRAS |
|            | Ca(ICC2/PI489777)SNP_10600 | 688  | C | T | 6   | 4   | -- | GRAS |
|            | Ca(ICC2/PI489777)SNP_10601 | 1359 | C | A | 5   | 5   | -- | GRAS |
|            | Ca(ICC2/PI489777)SNP_10602 | 1473 | C | T | 5   | 5   | -- | GRAS |
|            | Ca(ICC2/PI489777)SNP_10603 | 1522 | T | C | 8   | 4   | -- | GRAS |
|            | Ca(ICC2/PI489777)SNP_10604 | 1546 | G | A | 8   | 4   | -- | GRAS |
| CakTC25928 | Ca(ICC2/PI489777)SNP_10605 | 218  | A | G | 3   | 5   | -- | --   |
|            | Ca(ICC2/PI489777)SNP_10606 | 271  | C | T | 4   | 5   | -- | --   |
|            | Ca(ICC2/PI489777)SNP_10607 | 783  | T | C | 10  | 5   | -- | --   |
|            | Ca(ICC2/PI489777)SNP_10608 | 892  | C | A | 10  | 7   | -- | --   |
| CakTC32137 | Ca(ICC2/PI489777)SNP_10609 | 1225 | A | G | 13  | 6   | -- | --   |
| CakTC27590 | Ca(ICC2/PI489777)SNP_10610 | 527  | C | T | 10  | 10  | -- | --   |
|            | Ca(ICC2/PI489777)SNP_10611 | 682  | C | T | 5   | 6   | -- | --   |
|            | Ca(ICC2/PI489777)SNP_10612 | 694  | T | G | 5   | 6   | -- | --   |
|            | Ca(ICC2/PI489777)SNP_10613 | 705  | G | A | 5   | 6   | -- | --   |
|            | Ca(ICC2/PI489777)SNP_10614 | 748  | G | A | 3   | 6   | -- | --   |
|            | Ca(ICC2/PI489777)SNP_10615 | 816  | T | C | 3   | 5   | -- | --   |
|            | Ca(ICC2/PI489777)SNP_10616 | 1009 | A | T | 4   | 5   | -- | --   |
| CakTC31313 | Ca(ICC2/PI489777)SNP_10617 | 267  | G | A | 6   | 3   | -- | --   |
|            | Ca(ICC2/PI489777)SNP_10618 | 603  | C | T | 4   | 3   | -- | --   |
| CakTC25124 | Ca(ICC2/PI489777)SNP_10619 | 408  | A | G | 13  | 5   | -- | --   |
|            | Ca(ICC2/PI489777)SNP_10620 | 613  | T | G | 10  | 3   | -- | --   |
| CakTC42356 | Ca(ICC2/PI489777)SNP_10621 | 12   | C | T | 11  | 5   | -- | --   |
|            | Ca(ICC2/PI489777)SNP_10622 | 55   | G | A | 112 | 67  | -- | --   |
|            | Ca(ICC2/PI489777)SNP_10623 | 162  | C | T | 169 | 105 | -- | --   |
|            | Ca(ICC2/PI489777)SNP_10624 | 192  | C | T | 166 | 109 | -- | --   |
|            | Ca(ICC2/PI489777)SNP_10625 | 567  | T | C | 86  | 73  | -- | --   |
| CakTC10185 | Ca(ICC2/PI489777)SNP_10626 | 518  | A | G | 10  | 10  | -- | --   |
|            | Ca(ICC2/PI489777)SNP_10627 | 584  | T | C | 11  | 10  | -- | --   |
| CakTC39116 | Ca(ICC2/PI489777)SNP_10628 | 94   | T | C | 8   | 6   | -- | --   |
|            | Ca(ICC2/PI489777)SNP_10629 | 100  | G | T | 9   | 4   | -- | --   |
|            | Ca(ICC2/PI489777)SNP_10630 | 116  | C | T | 11  | 6   | -- | --   |
|            | Ca(ICC2/PI489777)SNP_10631 | 168  | T | C | 11  | 5   | -- | --   |
|            | Ca(ICC2/PI489777)SNP_10632 | 250  | G | A | 11  | 4   | -- | --   |
|            | Ca(ICC2/PI489777)SNP_10633 | 624  | A | G | 9   | 4   | -- | --   |
|            | Ca(ICC2/PI489777)SNP_10634 | 734  | T | A | 11  | 3   | -- | --   |
| CakTC33506 | Ca(ICC2/PI489777)SNP_10635 | 357  | G | T | 26  | 15  | -- | --   |
|            | Ca(ICC2/PI489777)SNP_10636 | 480  | A | C | 25  | 13  | -- | --   |
|            | Ca(ICC2/PI489777)SNP_10637 | 510  | G | A | 22  | 13  | -- | --   |
| CakTC28471 | Ca(ICC2/PI489777)SNP_10638 | 86   | A | C | 8   | 8   | -- | --   |
| CakTC41997 | Ca(ICC2/PI489777)SNP_10639 | 502  | G | T | 20  | 4   | -- | --   |
| CakTC30248 | Ca(ICC2/PI489777)SNP_10640 | 69   | G | T | 4   | 3   | -- | --   |
|            | Ca(ICC2/PI489777)SNP_10641 | 85   | T | C | 4   | 4   | -- | --   |
|            | Ca(ICC2/PI489777)SNP_10642 | 378  | C | T | 10  | 10  | -- | --   |
|            | Ca(ICC2/PI489777)SNP_10643 | 843  | T | C | 19  | 6   | -- | --   |
|            | Ca(ICC2/PI489777)SNP_10644 | 994  | T | A | 16  | 12  | -- | --   |
|            | Ca(ICC2/PI489777)SNP_10645 | 1056 | T | G | 14  | 9   | -- | --   |
|            | Ca(ICC2/PI489777)SNP_10646 | 1274 | T | C | 24  | 10  | -- | --   |
|            | Ca(ICC2/PI489777)SNP_10647 | 1611 | G | A | 26  | 9   | -- | --   |
|            | Ca(ICC2/PI489777)SNP_10648 | 1671 | C | T | 25  | 13  | -- | --   |
|            | Ca(ICC2/PI489777)SNP_10649 | 1695 | C | T | 20  | 14  | -- | --   |
|            | Ca(ICC2/PI489777)SNP_10650 | 2047 | G | A | 18  | 10  | -- | --   |
|            | Ca(ICC2/PI489777)SNP_10651 | 2232 | A | G | 17  | 9   | -- | --   |



|            |                            |      |   |   |    |    |        |      |
|------------|----------------------------|------|---|---|----|----|--------|------|
|            | Ca(ICC2/PI489777)SNP_10652 | 2325 | A | T | 13 | 11 | --     | --   |
|            | Ca(ICC2/PI489777)SNP_10653 | 2395 | T | C | 11 | 9  | --     | --   |
|            | Ca(ICC2/PI489777)SNP_10654 | 2714 | T | A | 7  | 8  | --     | --   |
|            | Ca(ICC2/PI489777)SNP_10655 | 2822 | G | T | 6  | 7  | --     | --   |
|            | Ca(ICC2/PI489777)SNP_10656 | 3306 | G | A | 7  | 4  | --     | --   |
|            | Ca(ICC2/PI489777)SNP_10657 | 3670 | T | C | 4  | 3  | --     | --   |
|            | Ca(ICC2/PI489777)SNP_10658 | 3689 | A | T | 4  | 3  | --     | --   |
|            | Ca(ICC2/PI489777)SNP_10659 | 3695 | C | T | 5  | 6  | --     | --   |
| CakTC43342 | Ca(ICC2/PI489777)SNP_10660 | 178  | T | G | 12 | 3  | --     | --   |
| CakTC35974 | Ca(ICC2/PI489777)SNP_10661 | 3319 | A | T | 27 | 7  | --     | TPR  |
| CakTC05847 | Ca(ICC2/PI489777)SNP_10662 | 496  | A | G | 34 | 28 | --     | --   |
| CakTC27618 | Ca(ICC2/PI489777)SNP_10663 | 272  | C | T | 28 | 13 | --     | LOB  |
|            | Ca(ICC2/PI489777)SNP_10664 | 371  | A | G | 29 | 18 | --     | LOB  |
| CakTC42708 | Ca(ICC2/PI489777)SNP_10665 | 76   | G | A | 3  | 3  | --     | --   |
|            | Ca(ICC2/PI489777)SNP_10666 | 420  | G | A | 3  | 3  | --     | --   |
| CakTC35860 | Ca(ICC2/PI489777)SNP_10667 | 1205 | A | G | 9  | 4  | --     | --   |
| CakTC08461 | Ca(ICC2/PI489777)SNP_10668 | 937  | G | T | 3  | 5  | --     | --   |
|            | Ca(ICC2/PI489777)SNP_10669 | 1804 | T | C | 3  | 3  | --     | --   |
|            | Ca(ICC2/PI489777)SNP_10670 | 1831 | A | G | 4  | 3  | --     | --   |
|            | Ca(ICC2/PI489777)SNP_10671 | 3250 | C | T | 4  | 4  | --     | --   |
| CakTC29610 | Ca(ICC2/PI489777)SNP_10672 | 522  | A | G | 3  | 7  | --     | --   |
|            | Ca(ICC2/PI489777)SNP_10673 | 1299 | T | C | 3  | 4  | --     | --   |
| CakTC42692 | Ca(ICC2/PI489777)SNP_10674 | 686  | G | T | 3  | 3  | --     | --   |
| CakTC10212 | Ca(ICC2/PI489777)SNP_10675 | 799  | C | G | 3  | 4  | --     | --   |
| CakTC39378 | Ca(ICC2/PI489777)SNP_10676 | 626  | T | G | 20 | 5  | --     | --   |
|            | Ca(ICC2/PI489777)SNP_10677 | 669  | C | G | 22 | 5  | --     | --   |
|            | Ca(ICC2/PI489777)SNP_10678 | 674  | G | T | 21 | 5  | --     | --   |
|            | Ca(ICC2/PI489777)SNP_10679 | 961  | A | T | 23 | 9  | --     | --   |
| CakTC38743 | Ca(ICC2/PI489777)SNP_10680 | 479  | T | C | 8  | 3  | --     | HB   |
|            | Ca(ICC2/PI489777)SNP_10681 | 1083 | T | C | 4  | 3  | --     | HB   |
| CakTC36747 | Ca(ICC2/PI489777)SNP_10682 | 157  | T | C | 14 | 6  | --     | --   |
|            | Ca(ICC2/PI489777)SNP_10683 | 172  | C | T | 14 | 6  | --     | --   |
|            | Ca(ICC2/PI489777)SNP_10684 | 451  | A | G | 12 | 4  | --     | --   |
|            | Ca(ICC2/PI489777)SNP_10685 | 1621 | C | A | 13 | 10 | --     | --   |
|            | Ca(ICC2/PI489777)SNP_10686 | 1987 | G | A | 5  | 6  | --     | --   |
|            | Ca(ICC2/PI489777)SNP_10687 | 1994 | G | T | 5  | 6  | --     | --   |
|            | Ca(ICC2/PI489777)SNP_10688 | 2096 | A | G | 8  | 8  | --     | --   |
| CakTC24407 | Ca(ICC2/PI489777)SNP_10689 | 697  | A | T | 46 | 19 | Mature | Leaf |
|            | Ca(ICC2/PI489777)SNP_10690 | 1033 | T | C | 22 | 11 | Mature | Leaf |
| CakTC25898 | Ca(ICC2/PI489777)SNP_10691 | 277  | T | C | 4  | 10 | --     | --   |
|            | Ca(ICC2/PI489777)SNP_10692 | 587  | A | G | 7  | 7  | --     | --   |
|            | Ca(ICC2/PI489777)SNP_10693 | 629  | G | A | 7  | 7  | --     | --   |
|            | Ca(ICC2/PI489777)SNP_10694 | 1120 | T | G | 8  | 14 | --     | --   |
|            | Ca(ICC2/PI489777)SNP_10695 | 1364 | C | G | 3  | 5  | --     | --   |
| CakTC26497 | Ca(ICC2/PI489777)SNP_10696 | 539  | C | T | 22 | 7  | --     | --   |
|            | Ca(ICC2/PI489777)SNP_10697 | 683  | A | T | 73 | 11 | --     | --   |
|            | Ca(ICC2/PI489777)SNP_10698 | 982  | G | A | 81 | 10 | --     | --   |
|            | Ca(ICC2/PI489777)SNP_10699 | 989  | G | A | 75 | 10 | --     | --   |
|            | Ca(ICC2/PI489777)SNP_10700 | 993  | G | C | 77 | 10 | --     | --   |
|            | Ca(ICC2/PI489777)SNP_10701 | 1015 | A | T | 76 | 10 | --     | --   |
|            | Ca(ICC2/PI489777)SNP_10702 | 1058 | G | C | 70 | 10 | --     | --   |
|            | Ca(ICC2/PI489777)SNP_10703 | 1100 | T | C | 72 | 10 | --     | --   |
| CakTC27373 | Ca(ICC2/PI489777)SNP_10704 | 125  | G | A | 12 | 3  | --     | --   |
|            | Ca(ICC2/PI489777)SNP_10705 | 2176 | G | C | 17 | 16 | --     | --   |
|            | Ca(ICC2/PI489777)SNP_10706 | 2233 | A | T | 17 | 15 | --     | --   |
| CakTC23976 | Ca(ICC2/PI489777)SNP_10707 | 334  | G | A | 27 | 5  | --     | --   |
|            | Ca(ICC2/PI489777)SNP_10708 | 341  | A | G | 23 | 5  | --     | --   |
|            | Ca(ICC2/PI489777)SNP_10709 | 1022 | C | T | 10 | 3  | --     | --   |
|            | Ca(ICC2/PI489777)SNP_10710 | 1053 | A | T | 12 | 3  | --     | --   |
| CakTC37449 | Ca(ICC2/PI489777)SNP_10711 | 547  | T | C | 5  | 4  | --     | --   |
| CakTC39612 | Ca(ICC2/PI489777)SNP_10712 | 298  | T | C | 24 | 14 | --     | --   |
|            | Ca(ICC2/PI489777)SNP_10713 | 332  | C | T | 19 | 17 | --     | --   |
|            | Ca(ICC2/PI489777)SNP_10714 | 385  | A | G | 26 | 17 | --     | --   |
|            | Ca(ICC2/PI489777)SNP_10715 | 856  | C | T | 17 | 18 | --     | --   |
|            | Ca(ICC2/PI489777)SNP_10716 | 979  | T | C | 8  | 18 | --     | --   |
| CakTC28728 | Ca(ICC2/PI489777)SNP_10717 | 450  | A | T | 18 | 9  | --     | --   |
|            | Ca(ICC2/PI489777)SNP_10718 | 512  | A | T | 16 | 7  | --     | --   |
|            | Ca(ICC2/PI489777)SNP_10719 | 636  | G | A | 16 | 15 | --     | --   |
|            | Ca(ICC2/PI489777)SNP_10720 | 669  | T | C | 10 | 13 | --     | --   |
|            | Ca(ICC2/PI489777)SNP_10721 | 1116 | C | A | 9  | 17 | --     | --   |
| CakTC31732 | Ca(ICC2/PI489777)SNP_10722 | 495  | T | G | 60 | 45 | --     | --   |
|            | Ca(ICC2/PI489777)SNP_10723 | 873  | A | G | 43 | 30 | --     | --   |
|            | Ca(ICC2/PI489777)SNP_10724 | 2250 | C | T | 30 | 18 | --     | --   |
| CakTC26991 | Ca(ICC2/PI489777)SNP_10725 | 154  | G | A | 3  | 5  | --     | --   |

|            |                            |      |   |   |    |    |    |     |
|------------|----------------------------|------|---|---|----|----|----|-----|
|            | Ca(ICC2/PI489777)SNP_10726 | 473  | T | C | 11 | 6  | -- | --  |
|            | Ca(ICC2/PI489777)SNP_10727 | 1341 | T | C | 5  | 4  | -- | --  |
| CakTC38689 | Ca(ICC2/PI489777)SNP_10728 | 113  | A | G | 31 | 12 | -- | HB  |
| CakTC29914 | Ca(ICC2/PI489777)SNP_10729 | 1095 | C | T | 19 | 12 | -- | --  |
|            | Ca(ICC2/PI489777)SNP_10730 | 1461 | G | A | 21 | 10 | -- | --  |
|            | Ca(ICC2/PI489777)SNP_10731 | 1515 | A | T | 19 | 11 | -- | --  |
|            | Ca(ICC2/PI489777)SNP_10732 | 1623 | T | C | 7  | 10 | -- | --  |
|            | Ca(ICC2/PI489777)SNP_10733 | 1993 | C | T | 11 | 6  | -- | --  |
|            | Ca(ICC2/PI489777)SNP_10734 | 2231 | G | A | 11 | 8  | -- | --  |
| CakTC31096 | Ca(ICC2/PI489777)SNP_10735 | 1189 | T | C | 3  | 3  | -- | --  |
|            | Ca(ICC2/PI489777)SNP_10736 | 1201 | C | T | 4  | 3  | -- | --  |
| CakTC31878 | Ca(ICC2/PI489777)SNP_10737 | 1080 | C | T | 7  | 12 | -- | --  |
| CakTC38630 | Ca(ICC2/PI489777)SNP_10738 | 914  | A | C | 4  | 6  | -- | --  |
|            | Ca(ICC2/PI489777)SNP_10739 | 952  | C | T | 5  | 5  | -- | --  |
|            | Ca(ICC2/PI489777)SNP_10740 | 1075 | A | G | 3  | 4  | -- | --  |
| CakTC26740 | Ca(ICC2/PI489777)SNP_10741 | 340  | G | C | 14 | 5  | -- | --  |
|            | Ca(ICC2/PI489777)SNP_10742 | 433  | T | C | 5  | 5  | -- | --  |
|            | Ca(ICC2/PI489777)SNP_10743 | 665  | T | C | 21 | 22 | -- | --  |
|            | Ca(ICC2/PI489777)SNP_10744 | 698  | C | T | 18 | 23 | -- | --  |
|            | Ca(ICC2/PI489777)SNP_10745 | 727  | G | A | 20 | 25 | -- | --  |
|            | Ca(ICC2/PI489777)SNP_10746 | 943  | T | G | 26 | 21 | -- | --  |
|            | Ca(ICC2/PI489777)SNP_10747 | 955  | C | T | 24 | 22 | -- | --  |
| CakTC34904 | Ca(ICC2/PI489777)SNP_10748 | 64   | A | C | 3  | 3  | -- | --  |
|            | Ca(ICC2/PI489777)SNP_10749 | 83   | T | C | 3  | 3  | -- | --  |
| CakTC28116 | Ca(ICC2/PI489777)SNP_10750 | 300  | G | C | 20 | 9  | -- | --  |
|            | Ca(ICC2/PI489777)SNP_10751 | 1561 | G | T | 17 | 4  | -- | --  |
| CakTC36632 | Ca(ICC2/PI489777)SNP_10752 | 396  | A | G | 33 | 14 | -- | --  |
|            | Ca(ICC2/PI489777)SNP_10753 | 447  | C | T | 34 | 12 | -- | --  |
|            | Ca(ICC2/PI489777)SNP_10754 | 894  | A | C | 34 | 14 | -- | --  |
|            | Ca(ICC2/PI489777)SNP_10755 | 957  | T | C | 32 | 17 | -- | --  |
|            | Ca(ICC2/PI489777)SNP_10756 | 1572 | G | T | 25 | 14 | -- | --  |
|            | Ca(ICC2/PI489777)SNP_10757 | 1573 | C | T | 26 | 14 | -- | --  |
|            | Ca(ICC2/PI489777)SNP_10758 | 2016 | G | A | 26 | 16 | -- | --  |
|            | Ca(ICC2/PI489777)SNP_10759 | 2046 | G | T | 27 | 19 | -- | --  |
|            | Ca(ICC2/PI489777)SNP_10760 | 2085 | T | A | 24 | 13 | -- | --  |
|            | Ca(ICC2/PI489777)SNP_10761 | 2425 | A | G | 20 | 8  | -- | --  |
|            | Ca(ICC2/PI489777)SNP_10762 | 2496 | A | T | 14 | 3  | -- | --  |
|            | Ca(ICC2/PI489777)SNP_10763 | 2528 | G | A | 11 | 3  | -- | --  |
|            | Ca(ICC2/PI489777)SNP_10764 | 2641 | G | A | 3  | 3  | -- | --  |
| CakTC35224 | Ca(ICC2/PI489777)SNP_10765 | 1350 | C | T | 8  | 5  | -- | SET |
|            | Ca(ICC2/PI489777)SNP_10766 | 1356 | C | T | 8  | 5  | -- | SET |
|            | Ca(ICC2/PI489777)SNP_10767 | 1362 | A | T | 8  | 5  | -- | SET |
|            | Ca(ICC2/PI489777)SNP_10768 | 1437 | C | T | 6  | 8  | -- | SET |
| CakTC35202 | Ca(ICC2/PI489777)SNP_10769 | 312  | A | G | 8  | 5  | -- | --  |
|            | Ca(ICC2/PI489777)SNP_10770 | 536  | A | G | 7  | 3  | -- | --  |
|            | Ca(ICC2/PI489777)SNP_10771 | 2165 | G | A | 13 | 6  | -- | --  |
|            | Ca(ICC2/PI489777)SNP_10772 | 2290 | C | A | 9  | 4  | -- | --  |
|            | Ca(ICC2/PI489777)SNP_10773 | 2507 | T | C | 8  | 12 | -- | --  |
| CakTC40106 | Ca(ICC2/PI489777)SNP_10774 | 323  | T | C | 10 | 9  | -- | --  |
|            | Ca(ICC2/PI489777)SNP_10775 | 587  | G | A | 9  | 8  | -- | --  |
|            | Ca(ICC2/PI489777)SNP_10776 | 716  | T | C | 11 | 6  | -- | --  |
|            | Ca(ICC2/PI489777)SNP_10777 | 728  | C | T | 12 | 6  | -- | --  |
|            | Ca(ICC2/PI489777)SNP_10778 | 1428 | A | G | 4  | 9  | -- | --  |
|            | Ca(ICC2/PI489777)SNP_10779 | 1467 | T | A | 3  | 9  | -- | --  |
|            | Ca(ICC2/PI489777)SNP_10780 | 1638 | T | C | 7  | 7  | -- | --  |
| CakTC33767 | Ca(ICC2/PI489777)SNP_10781 | 145  | A | G | 5  | 12 | -- | --  |
|            | Ca(ICC2/PI489777)SNP_10782 | 548  | G | T | 11 | 18 | -- | --  |
| CakTC29845 | Ca(ICC2/PI489777)SNP_10783 | 619  | G | T | 7  | 3  | -- | --  |
|            | Ca(ICC2/PI489777)SNP_10784 | 1194 | C | T | 20 | 6  | -- | --  |
|            | Ca(ICC2/PI489777)SNP_10785 | 1421 | A | T | 14 | 12 | -- | --  |
|            | Ca(ICC2/PI489777)SNP_10786 | 1717 | A | C | 7  | 8  | -- | --  |
|            | Ca(ICC2/PI489777)SNP_10787 | 1816 | G | A | 8  | 7  | -- | --  |
|            | Ca(ICC2/PI489777)SNP_10788 | 2632 | A | G | 7  | 3  | -- | --  |
|            | Ca(ICC2/PI489777)SNP_10789 | 2704 | C | A | 7  | 9  | -- | --  |
|            | Ca(ICC2/PI489777)SNP_10790 | 2835 | T | C | 5  | 5  | -- | --  |
| CakTC37423 | Ca(ICC2/PI489777)SNP_10791 | 170  | T | A | 34 | 10 | -- | --  |
|            | Ca(ICC2/PI489777)SNP_10792 | 353  | C | T | 62 | 30 | -- | --  |
|            | Ca(ICC2/PI489777)SNP_10793 | 888  | A | G | 33 | 15 | -- | --  |
|            | Ca(ICC2/PI489777)SNP_10794 | 998  | C | G | 25 | 12 | -- | --  |
| CakTC37442 | Ca(ICC2/PI489777)SNP_10795 | 461  | G | A | 8  | 4  | -- | --  |
| CakTC25440 | Ca(ICC2/PI489777)SNP_10796 | 389  | T | C | 24 | 13 | -- | --  |
|            | Ca(ICC2/PI489777)SNP_10797 | 399  | T | C | 28 | 12 | -- | --  |
|            | Ca(ICC2/PI489777)SNP_10798 | 1342 | C | T | 28 | 4  | -- | --  |
|            | Ca(ICC2/PI489777)SNP_10799 | 1543 | T | C | 35 | 16 | -- | --  |

|            |                            |      |   |   |     |     |        |      |
|------------|----------------------------|------|---|---|-----|-----|--------|------|
| CakTC29486 | Ca(ICC2/PI489777)SNP_10800 | 117  | G | C | 4   | 3   | --     | --   |
|            | Ca(ICC2/PI489777)SNP_10801 | 616  | G | A | 14  | 16  | --     | --   |
|            | Ca(ICC2/PI489777)SNP_10802 | 677  | T | G | 13  | 14  | --     | --   |
|            | Ca(ICC2/PI489777)SNP_10803 | 678  | C | G | 13  | 14  | --     | --   |
|            | Ca(ICC2/PI489777)SNP_10804 | 712  | T | A | 8   | 11  | --     | --   |
|            | Ca(ICC2/PI489777)SNP_10805 | 724  | G | C | 7   | 7   | --     | --   |
| CakTC07869 | Ca(ICC2/PI489777)SNP_10806 | 837  | T | G | 41  | 46  | --     | --   |
|            | Ca(ICC2/PI489777)SNP_10807 | 1915 | C | G | 13  | 27  | --     | --   |
| CakTC25653 | Ca(ICC2/PI489777)SNP_10808 | 1827 | T | C | 133 | 13  | --     | --   |
|            | Ca(ICC2/PI489777)SNP_10809 | 1983 | T | C | 112 | 9   | --     | --   |
|            | Ca(ICC2/PI489777)SNP_10810 | 2823 | A | G | 187 | 39  | --     | --   |
|            | Ca(ICC2/PI489777)SNP_10811 | 2869 | G | A | 192 | 32  | --     | --   |
|            | Ca(ICC2/PI489777)SNP_10812 | 2996 | A | T | 133 | 15  | --     | --   |
|            | Ca(ICC2/PI489777)SNP_10813 | 3003 | C | A | 132 | 20  | --     | --   |
|            | Ca(ICC2/PI489777)SNP_10814 | 3059 | A | G | 66  | 4   | --     | --   |
| CakTC26123 | Ca(ICC2/PI489777)SNP_10815 | 382  | G | A | 7   | 5   | --     | --   |
|            | Ca(ICC2/PI489777)SNP_10816 | 393  | A | G | 6   | 3   | --     | --   |
|            | Ca(ICC2/PI489777)SNP_10817 | 428  | T | A | 9   | 6   | --     | --   |
|            | Ca(ICC2/PI489777)SNP_10818 | 477  | T | C | 9   | 5   | --     | --   |
|            | Ca(ICC2/PI489777)SNP_10819 | 496  | C | T | 7   | 5   | --     | --   |
|            | Ca(ICC2/PI489777)SNP_10820 | 582  | A | T | 10  | 6   | --     | --   |
|            | Ca(ICC2/PI489777)SNP_10821 | 630  | A | T | 10  | 7   | --     | --   |
|            | Ca(ICC2/PI489777)SNP_10822 | 840  | G | A | 5   | 11  | --     | --   |
| CakTC25303 | Ca(ICC2/PI489777)SNP_10823 | 1130 | A | C | 142 | 175 | --     | --   |
|            | Ca(ICC2/PI489777)SNP_10824 | 1526 | A | T | 27  | 36  | --     | --   |
|            | Ca(ICC2/PI489777)SNP_10825 | 1550 | G | C | 26  | 21  | --     | --   |
| CakTC25985 | Ca(ICC2/PI489777)SNP_10826 | 347  | A | G | 63  | 58  | --     | --   |
|            | Ca(ICC2/PI489777)SNP_10827 | 1455 | A | G | 89  | 64  | --     | --   |
|            | Ca(ICC2/PI489777)SNP_10828 | 1811 | A | T | 127 | 93  | --     | --   |
|            | Ca(ICC2/PI489777)SNP_10829 | 1973 | A | G | 122 | 89  | --     | --   |
|            | Ca(ICC2/PI489777)SNP_10830 | 2030 | C | T | 119 | 83  | --     | --   |
|            | Ca(ICC2/PI489777)SNP_10831 | 2759 | T | C | 56  | 43  | --     | --   |
|            | Ca(ICC2/PI489777)SNP_10832 | 2786 | C | A | 47  | 38  | --     | --   |
| CakTC32905 | Ca(ICC2/PI489777)SNP_10833 | 2312 | T | C | 3   | 4   | --     | FAR1 |
| CakTC02731 | Ca(ICC2/PI489777)SNP_10834 | 75   | C | A | 3   | 4   | --     | --   |
|            | Ca(ICC2/PI489777)SNP_10835 | 243  | T | G | 9   | 4   | --     | --   |
| CakTC41950 | Ca(ICC2/PI489777)SNP_10836 | 31   | A | T | 12  | 11  | --     | --   |
|            | Ca(ICC2/PI489777)SNP_10837 | 742  | C | T | 68  | 80  | --     | --   |
| CakTC41084 | Ca(ICC2/PI489777)SNP_10838 | 258  | C | A | 18  | 5   | --     | --   |
|            | Ca(ICC2/PI489777)SNP_10839 | 1959 | A | G | 10  | 6   | --     | --   |
|            | Ca(ICC2/PI489777)SNP_10840 | 2050 | G | A | 15  | 6   | --     | --   |
| CakTC39177 | Ca(ICC2/PI489777)SNP_10841 | 518  | C | T | 25  | 14  | --     | --   |
|            | Ca(ICC2/PI489777)SNP_10842 | 1228 | G | C | 8   | 8   | --     | --   |
| CakTC33329 | Ca(ICC2/PI489777)SNP_10843 | 442  | C | T | 48  | 5   | --     | --   |
| CakTC37116 | Ca(ICC2/PI489777)SNP_10844 | 171  | A | T | 23  | 10  | --     | --   |
|            | Ca(ICC2/PI489777)SNP_10845 | 392  | T | G | 33  | 12  | --     | --   |
|            | Ca(ICC2/PI489777)SNP_10846 | 772  | G | T | 24  | 15  | --     | --   |
|            | Ca(ICC2/PI489777)SNP_10847 | 1316 | T | C | 59  | 21  | --     | --   |
|            | Ca(ICC2/PI489777)SNP_10848 | 1355 | C | T | 59  | 16  | --     | --   |
|            | Ca(ICC2/PI489777)SNP_10849 | 1873 | A | C | 97  | 48  | --     | --   |
|            | Ca(ICC2/PI489777)SNP_10850 | 2123 | A | G | 90  | 55  | --     | --   |
| CakTC31392 | Ca(ICC2/PI489777)SNP_10851 | 213  | A | T | 51  | 13  | --     | --   |
|            | Ca(ICC2/PI489777)SNP_10852 | 344  | A | G | 68  | 19  | --     | --   |
|            | Ca(ICC2/PI489777)SNP_10853 | 887  | C | T | 62  | 29  | --     | --   |
|            | Ca(ICC2/PI489777)SNP_10854 | 893  | G | T | 63  | 28  | --     | --   |
|            | Ca(ICC2/PI489777)SNP_10855 | 1043 | G | C | 62  | 34  | --     | --   |
|            | Ca(ICC2/PI489777)SNP_10856 | 1250 | A | G | 69  | 42  | --     | --   |
|            | Ca(ICC2/PI489777)SNP_10857 | 1442 | A | T | 83  | 45  | --     | --   |
|            | Ca(ICC2/PI489777)SNP_10858 | 1505 | G | T | 90  | 42  | --     | --   |
| CakTC28632 | Ca(ICC2/PI489777)SNP_10859 | 342  | T | C | 18  | 15  | --     | --   |
|            | Ca(ICC2/PI489777)SNP_10860 | 559  | T | G | 29  | 14  | --     | --   |
| CakTC31520 | Ca(ICC2/PI489777)SNP_10861 | 502  | T | C | 5   | 4   | --     | --   |
| CakTC32464 | Ca(ICC2/PI489777)SNP_10862 | 155  | G | A | 9   | 7   | Mature | Leaf |
|            | Ca(ICC2/PI489777)SNP_10863 | 330  | T | C | 8   | 5   | Mature | Leaf |
| CakTC16057 | Ca(ICC2/PI489777)SNP_10864 | 267  | A | G | 3   | 3   | --     | --   |
| CakTC27107 | Ca(ICC2/PI489777)SNP_10865 | 120  | C | T | 14  | 4   | --     | --   |
|            | Ca(ICC2/PI489777)SNP_10866 | 258  | T | A | 13  | 4   | --     | --   |
|            | Ca(ICC2/PI489777)SNP_10867 | 1401 | C | T | 11  | 14  | --     | --   |
|            | Ca(ICC2/PI489777)SNP_10868 | 2034 | T | C | 4   | 7   | --     | --   |
|            | Ca(ICC2/PI489777)SNP_10869 | 2373 | C | A | 11  | 9   | --     | --   |
|            | Ca(ICC2/PI489777)SNP_10870 | 3240 | G | A | 6   | 11  | --     | --   |
| CakTC23749 | Ca(ICC2/PI489777)SNP_10871 | 139  | A | G | 38  | 8   | --     | --   |
|            | Ca(ICC2/PI489777)SNP_10872 | 265  | A | C | 52  | 11  | --     | --   |
| CakTC39569 | Ca(ICC2/PI489777)SNP_10873 | 187  | A | G | 18  | 12  | --     | --   |

|            |                            |       |   |   |    |    |           |     |
|------------|----------------------------|-------|---|---|----|----|-----------|-----|
|            | Ca(ICC2/PI489777)SNP_10874 | 659   | A | G | 14 | 8  | --        | --  |
|            | Ca(ICC2/PI489777)SNP_10875 | 1132  | A | G | 28 | 9  | --        | --  |
|            | Ca(ICC2/PI489777)SNP_10876 | 1139  | T | G | 27 | 9  | --        | --  |
| CakTC41886 | Ca(ICC2/PI489777)SNP_10877 | 459   | A | C | 12 | 11 | --        | --  |
| CakTC42241 | Ca(ICC2/PI489777)SNP_10878 | 126   | C | A | 16 | 3  | --        | --  |
|            | Ca(ICC2/PI489777)SNP_10879 | 278   | T | C | 15 | 4  | --        | --  |
| CakTC29282 | Ca(ICC2/PI489777)SNP_10880 | 578   | A | G | 3  | 5  | --        | --  |
| CakTC42747 | Ca(ICC2/PI489777)SNP_10881 | 988   | T | C | 6  | 3  | Young_pod | --  |
|            | Ca(ICC2/PI489777)SNP_10882 | 1264  | A | G | 7  | 3  | Young_pod | --  |
|            | Ca(ICC2/PI489777)SNP_10883 | 1398  | T | G | 10 | 3  | Young_pod | --  |
|            | Ca(ICC2/PI489777)SNP_10884 | 1480  | T | C | 9  | 3  | Young_pod | --  |
| CakTC35834 | Ca(ICC2/PI489777)SNP_10885 | 2239  | G | A | 12 | 7  | --        | --  |
|            | Ca(ICC2/PI489777)SNP_10886 | 3263  | C | T | 5  | 6  | --        | --  |
| CakTC34384 | Ca(ICC2/PI489777)SNP_10887 | 814   | G | A | 25 | 7  | --        | --  |
|            | Ca(ICC2/PI489777)SNP_10888 | 964   | A | G | 25 | 11 | --        | --  |
|            | Ca(ICC2/PI489777)SNP_10889 | 1030  | C | A | 24 | 11 | --        | --  |
| CakTC06367 | Ca(ICC2/PI489777)SNP_10890 | 229   | T | A | 4  | 5  | --        | --  |
| CakTC08968 | Ca(ICC2/PI489777)SNP_10891 | 677   | C | T | 3  | 4  | Young_pod | --  |
|            | Ca(ICC2/PI489777)SNP_10892 | 807   | C | T | 3  | 4  | Young_pod | --  |
|            | Ca(ICC2/PI489777)SNP_10893 | 855   | T | C | 3  | 4  | Young_pod | --  |
| CakTC26345 | Ca(ICC2/PI489777)SNP_10894 | 490   | C | T | 12 | 8  | --        | --  |
|            | Ca(ICC2/PI489777)SNP_10895 | 535   | T | C | 17 | 6  | --        | --  |
|            | Ca(ICC2/PI489777)SNP_10896 | 1084  | T | G | 15 | 11 | --        | --  |
|            | Ca(ICC2/PI489777)SNP_10897 | 1420  | C | G | 23 | 13 | --        | --  |
|            | Ca(ICC2/PI489777)SNP_10898 | 1610  | T | A | 15 | 8  | --        | --  |
| CakTC22857 | Ca(ICC2/PI489777)SNP_10899 | 399   | T | C | 9  | 4  | --        | --  |
|            | Ca(ICC2/PI489777)SNP_10900 | 499   | C | G | 13 | 5  | --        | --  |
|            | Ca(ICC2/PI489777)SNP_10901 | 533   | A | T | 14 | 3  | --        | --  |
| CakTC25103 | Ca(ICC2/PI489777)SNP_10902 | 191   | G | C | 18 | 9  | --        | --  |
|            | Ca(ICC2/PI489777)SNP_10903 | 716   | G | A | 24 | 12 | --        | --  |
|            | Ca(ICC2/PI489777)SNP_10904 | 1387  | C | T | 18 | 9  | --        | --  |
|            | Ca(ICC2/PI489777)SNP_10905 | 1388  | G | A | 18 | 9  | --        | --  |
|            | Ca(ICC2/PI489777)SNP_10906 | 1424  | C | T | 16 | 5  | --        | --  |
| CakTC24552 | Ca(ICC2/PI489777)SNP_10907 | 53    | A | T | 5  | 3  | --        | --  |
|            | Ca(ICC2/PI489777)SNP_10908 | 166   | A | T | 6  | 5  | --        | --  |
|            | Ca(ICC2/PI489777)SNP_10909 | 313   | C | T | 8  | 3  | --        | --  |
| CakTC40300 | Ca(ICC2/PI489777)SNP_10910 | 221   | C | T | 5  | 5  | --        | --  |
|            | Ca(ICC2/PI489777)SNP_10911 | 287   | G | A | 6  | 5  | --        | --  |
|            | Ca(ICC2/PI489777)SNP_10912 | 1502  | C | T | 13 | 18 | --        | --  |
| CakTC38755 | Ca(ICC2/PI489777)SNP_10913 | 1325  | A | G | 5  | 6  | --        | --  |
|            | Ca(ICC2/PI489777)SNP_10914 | 1340  | G | A | 5  | 6  | --        | --  |
| CakTC28008 | Ca(ICC2/PI489777)SNP_10915 | 1146  | G | A | 86 | 50 | --        | --  |
|            | Ca(ICC2/PI489777)SNP_10916 | 1148  | C | G | 86 | 50 | --        | --  |
| CakTC08469 | Ca(ICC2/PI489777)SNP_10917 | 401   | G | T | 3  | 8  | --        | --  |
| CakTC37554 | Ca(ICC2/PI489777)SNP_10918 | 216   | C | T | 9  | 6  | --        | --  |
|            | Ca(ICC2/PI489777)SNP_10919 | 410   | G | T | 12 | 10 | --        | --  |
|            | Ca(ICC2/PI489777)SNP_10920 | 587   | A | G | 12 | 10 | --        | --  |
|            | Ca(ICC2/PI489777)SNP_10921 | 761   | G | C | 19 | 9  | --        | --  |
|            | Ca(ICC2/PI489777)SNP_10922 | 1007  | C | A | 10 | 3  | --        | --  |
| CakTC31404 | Ca(ICC2/PI489777)SNP_10923 | 162   | G | A | 11 | 12 | --        | --  |
|            | Ca(ICC2/PI489777)SNP_10924 | 1008  | C | T | 3  | 3  | --        | --  |
|            | Ca(ICC2/PI489777)SNP_10925 | 1373  | C | T | 6  | 8  | --        | --  |
|            | Ca(ICC2/PI489777)SNP_10926 | 1530  | C | A | 5  | 6  | --        | --  |
| CakTC26609 | Ca(ICC2/PI489777)SNP_10927 | 563   | T | C | 9  | 5  | --        | --  |
|            | Ca(ICC2/PI489777)SNP_10928 | 661   | C | G | 12 | 3  | --        | --  |
|            | Ca(ICC2/PI489777)SNP_10929 | 664   | G | A | 15 | 3  | --        | --  |
|            | Ca(ICC2/PI489777)SNP_10930 | 913   | G | C | 19 | 7  | --        | --  |
|            | Ca(ICC2/PI489777)SNP_10931 | 940   | G | T | 16 | 6  | --        | --  |
| CakTC37549 | Ca(ICC2/PI489777)SNP_10932 | 1154  | T | C | 18 | 11 | --        | --  |
| CakTC23645 | Ca(ICC2/PI489777)SNP_10933 | 6675  | A | G | 6  | 8  | --        | --  |
|            | Ca(ICC2/PI489777)SNP_10934 | 7206  | T | C | 12 | 8  | --        | --  |
|            | Ca(ICC2/PI489777)SNP_10935 | 9520  | G | C | 5  | 4  | --        | --  |
|            | Ca(ICC2/PI489777)SNP_10936 | 11255 | A | T | 4  | 3  | --        | --  |
| CakTC26168 | Ca(ICC2/PI489777)SNP_10937 | 724   | C | T | 10 | 13 | --        | --  |
| CakTC27672 | Ca(ICC2/PI489777)SNP_10938 | 65    | T | C | 25 | 5  | --        | --  |
|            | Ca(ICC2/PI489777)SNP_10939 | 115   | T | C | 31 | 5  | --        | --  |
| CakTC35758 | Ca(ICC2/PI489777)SNP_10940 | 808   | C | T | 8  | 9  | --        | ARF |
|            | Ca(ICC2/PI489777)SNP_10941 | 2197  | C | T | 15 | 4  | --        | ARF |
|            | Ca(ICC2/PI489777)SNP_10942 | 2389  | G | A | 11 | 9  | --        | ARF |
|            | Ca(ICC2/PI489777)SNP_10943 | 2449  | G | A | 21 | 10 | --        | ARF |
|            | Ca(ICC2/PI489777)SNP_10944 | 3067  | G | A | 14 | 5  | --        | ARF |
|            | Ca(ICC2/PI489777)SNP_10945 | 3250  | T | G | 7  | 6  | --        | ARF |
|            | Ca(ICC2/PI489777)SNP_10946 | 3376  | G | T | 9  | 8  | --        | ARF |
|            | Ca(ICC2/PI489777)SNP_10947 | 4269  | T | C | 5  | 7  | --        | ARF |

|            |                             |      |   |   |     |     |        |       |
|------------|-----------------------------|------|---|---|-----|-----|--------|-------|
| CakTC33681 | Ca(ICCV2/PI489777)SNP_10948 | 253  | G | A | 103 | 30  | --     | --    |
| CakTC32227 | Ca(ICCV2/PI489777)SNP_10949 | 986  | C | T | 3   | 3   | --     | --    |
|            | Ca(ICCV2/PI489777)SNP_10950 | 1100 | G | A | 6   | 3   | --     | --    |
| CakTC35217 | Ca(ICCV2/PI489777)SNP_10951 | 235  | T | C | 34  | 22  | --     | --    |
| CakTC03999 | Ca(ICCV2/PI489777)SNP_10952 | 749  | A | G | 4   | 3   | --     | --    |
|            | Ca(ICCV2/PI489777)SNP_10953 | 869  | A | G | 6   | 4   | --     | --    |
| CakTC22735 | Ca(ICCV2/PI489777)SNP_10954 | 42   | C | G | 28  | 28  | --     | --    |
|            | Ca(ICCV2/PI489777)SNP_10955 | 819  | A | T | 122 | 82  | --     | --    |
| CakTC38647 | Ca(ICCV2/PI489777)SNP_10956 | 406  | T | C | 7   | 12  | --     | --    |
| CakTC25607 | Ca(ICCV2/PI489777)SNP_10957 | 555  | A | T | 6   | 4   | Root   | --    |
|            | Ca(ICCV2/PI489777)SNP_10958 | 615  | A | G | 6   | 4   | Root   | --    |
|            | Ca(ICCV2/PI489777)SNP_10959 | 626  | C | T | 5   | 4   | Root   | --    |
| CakTC28694 | Ca(ICCV2/PI489777)SNP_10960 | 1567 | G | A | 3   | 4   | --     | --    |
| CakTC28119 | Ca(ICCV2/PI489777)SNP_10961 | 787  | A | G | 42  | 13  | --     | --    |
|            | Ca(ICCV2/PI489777)SNP_10962 | 1117 | A | G | 23  | 16  | --     | --    |
|            | Ca(ICCV2/PI489777)SNP_10963 | 1144 | G | C | 25  | 16  | --     | --    |
|            | Ca(ICCV2/PI489777)SNP_10964 | 1201 | A | G | 23  | 16  | --     | --    |
|            | Ca(ICCV2/PI489777)SNP_10965 | 1330 | G | T | 23  | 10  | --     | --    |
|            | Ca(ICCV2/PI489777)SNP_10966 | 1680 | C | T | 9   | 11  | --     | --    |
|            | Ca(ICCV2/PI489777)SNP_10967 | 1740 | C | T | 13  | 10  | --     | --    |
|            | Ca(ICCV2/PI489777)SNP_10968 | 2247 | G | A | 18  | 3   | --     | --    |
|            | Ca(ICCV2/PI489777)SNP_10969 | 2428 | A | C | 23  | 5   | --     | --    |
|            | Ca(ICCV2/PI489777)SNP_10970 | 2580 | A | G | 20  | 5   | --     | --    |
|            | Ca(ICCV2/PI489777)SNP_10971 | 2604 | A | G | 18  | 5   | --     | --    |
|            | Ca(ICCV2/PI489777)SNP_10972 | 3216 | T | C | 26  | 10  | --     | --    |
|            | Ca(ICCV2/PI489777)SNP_10973 | 3384 | A | G | 29  | 10  | --     | --    |
|            | Ca(ICCV2/PI489777)SNP_10974 | 3525 | G | A | 22  | 11  | --     | --    |
|            | Ca(ICCV2/PI489777)SNP_10975 | 3579 | C | T | 19  | 12  | --     | --    |
|            | Ca(ICCV2/PI489777)SNP_10976 | 3772 | A | G | 16  | 12  | --     | --    |
|            | Ca(ICCV2/PI489777)SNP_10977 | 4155 | C | T | 32  | 8   | --     | --    |
|            | Ca(ICCV2/PI489777)SNP_10978 | 4533 | G | C | 14  | 8   | --     | --    |
| CakTC30335 | Ca(ICCV2/PI489777)SNP_10979 | 563  | C | A | 7   | 8   | Shoot  | --    |
|            | Ca(ICCV2/PI489777)SNP_10980 | 635  | A | G | 6   | 5   | Shoot  | --    |
|            | Ca(ICCV2/PI489777)SNP_10981 | 1176 | G | C | 4   | 5   | Shoot  | --    |
| CakTC29324 | Ca(ICCV2/PI489777)SNP_10982 | 25   | C | T | 33  | 44  | --     | CCAAT |
| CakTC32278 | Ca(ICCV2/PI489777)SNP_10983 | 414  | C | G | 3   | 4   | --     | --    |
|            | Ca(ICCV2/PI489777)SNP_10984 | 559  | A | G | 6   | 6   | --     | --    |
|            | Ca(ICCV2/PI489777)SNP_10985 | 1378 | T | G | 7   | 7   | --     | --    |
|            | Ca(ICCV2/PI489777)SNP_10986 | 1412 | A | T | 8   | 4   | --     | --    |
|            | Ca(ICCV2/PI489777)SNP_10987 | 1504 | C | A | 8   | 7   | --     | --    |
|            | Ca(ICCV2/PI489777)SNP_10988 | 1518 | T | C | 8   | 6   | --     | --    |
|            | Ca(ICCV2/PI489777)SNP_10989 | 1739 | C | A | 10  | 9   | --     | --    |
|            | Ca(ICCV2/PI489777)SNP_10990 | 1760 | T | A | 9   | 11  | --     | --    |
| CakTC39562 | Ca(ICCV2/PI489777)SNP_10991 | 1067 | G | A | 7   | 9   | --     | --    |
|            | Ca(ICCV2/PI489777)SNP_10992 | 1082 | A | C | 7   | 9   | --     | --    |
|            | Ca(ICCV2/PI489777)SNP_10993 | 1693 | T | C | 3   | 5   | --     | --    |
| CakTC29374 | Ca(ICCV2/PI489777)SNP_10994 | 65   | G | C | 8   | 8   | --     | NAC   |
|            | Ca(ICCV2/PI489777)SNP_10995 | 621  | A | G | 19  | 17  | --     | NAC   |
|            | Ca(ICCV2/PI489777)SNP_10996 | 838  | T | A | 8   | 14  | --     | NAC   |
|            | Ca(ICCV2/PI489777)SNP_10997 | 920  | G | T | 3   | 8   | --     | NAC   |
|            | Ca(ICCV2/PI489777)SNP_10998 | 1092 | A | G | 9   | 5   | --     | NAC   |
|            | Ca(ICCV2/PI489777)SNP_10999 | 1094 | T | C | 10  | 5   | --     | NAC   |
|            | Ca(ICCV2/PI489777)SNP_11000 | 1102 | A | G | 10  | 5   | --     | NAC   |
| CakTC25285 | Ca(ICCV2/PI489777)SNP_11001 | 98   | C | A | 13  | 4   | Flower | bud   |
| CakTC34006 | Ca(ICCV2/PI489777)SNP_11002 | 333  | T | C | 32  | 5   | --     | --    |
|            | Ca(ICCV2/PI489777)SNP_11003 | 369  | T | C | 41  | 5   | --     | --    |
|            | Ca(ICCV2/PI489777)SNP_11004 | 2142 | G | A | 15  | 11  | --     | --    |
|            | Ca(ICCV2/PI489777)SNP_11005 | 2550 | G | A | 16  | 11  | --     | --    |
|            | Ca(ICCV2/PI489777)SNP_11006 | 3269 | A | G | 18  | 15  | --     | --    |
|            | Ca(ICCV2/PI489777)SNP_11007 | 5687 | C | G | 16  | 7   | --     | --    |
|            | Ca(ICCV2/PI489777)SNP_11008 | 6699 | A | T | 18  | 14  | --     | --    |
|            | Ca(ICCV2/PI489777)SNP_11009 | 7270 | A | G | 9   | 9   | --     | --    |
|            | Ca(ICCV2/PI489777)SNP_11010 | 7311 | A | G | 8   | 8   | --     | --    |
| CakTC25548 | Ca(ICCV2/PI489777)SNP_11011 | 93   | C | T | 29  | 7   | --     | --    |
|            | Ca(ICCV2/PI489777)SNP_11012 | 415  | T | C | 159 | 104 | --     | --    |
|            | Ca(ICCV2/PI489777)SNP_11013 | 527  | A | G | 190 | 154 | --     | --    |
| CakTC42518 | Ca(ICCV2/PI489777)SNP_11014 | 525  | T | C | 6   | 3   | Mature | Leaf  |
| CakTC36111 | Ca(ICCV2/PI489777)SNP_11015 | 482  | A | G | 12  | 7   | --     | --    |
| CakTC30354 | Ca(ICCV2/PI489777)SNP_11016 | 250  | A | C | 3   | 3   | --     | --    |
| CakTC28225 | Ca(ICCV2/PI489777)SNP_11017 | 441  | C | T | 46  | 11  | --     | --    |
| CakTC32496 | Ca(ICCV2/PI489777)SNP_11018 | 118  | A | C | 3   | 3   | --     | LOB   |
| CakTC26311 | Ca(ICCV2/PI489777)SNP_11019 | 574  | G | A | 7   | 8   | --     | bZIP  |
|            | Ca(ICCV2/PI489777)SNP_11020 | 656  | T | C | 5   | 10  | --     | bZIP  |
| CakTC43083 | Ca(ICCV2/PI489777)SNP_11021 | 540  | G | A | 10  | 7   | --     | --    |

|            |                            |      |   |   |     |    |        |      |
|------------|----------------------------|------|---|---|-----|----|--------|------|
|            | Ca(ICC2/PI489777)SNP_11022 | 859  | C | G | 3   | 6  | --     | --   |
|            | Ca(ICC2/PI489777)SNP_11023 | 888  | C | G | 3   | 6  | --     | --   |
| CakTC39752 | Ca(ICC2/PI489777)SNP_11024 | 1524 | G | T | 9   | 5  | --     | --   |
|            | Ca(ICC2/PI489777)SNP_11025 | 1606 | A | G | 6   | 5  | --     | --   |
|            | Ca(ICC2/PI489777)SNP_11026 | 1627 | G | A | 6   | 5  | --     | --   |
|            | Ca(ICC2/PI489777)SNP_11027 | 1667 | G | T | 5   | 5  | --     | --   |
|            | Ca(ICC2/PI489777)SNP_11028 | 1675 | T | G | 4   | 5  | --     | --   |
|            | Ca(ICC2/PI489777)SNP_11029 | 1709 | C | A | 4   | 5  | --     | --   |
| CakTC18943 | Ca(ICC2/PI489777)SNP_11030 | 3078 | C | T | 7   | 5  | --     | --   |
| CakTC23946 | Ca(ICC2/PI489777)SNP_11031 | 157  | C | T | 19  | 4  | --     | MYB  |
|            | Ca(ICC2/PI489777)SNP_11032 | 521  | T | A | 26  | 8  | --     | MYB  |
|            | Ca(ICC2/PI489777)SNP_11033 | 863  | T | G | 29  | 6  | --     | MYB  |
| CakTC06400 | Ca(ICC2/PI489777)SNP_11034 | 587  | C | T | 4   | 4  | --     | --   |
| CakTC35493 | Ca(ICC2/PI489777)SNP_11035 | 780  | C | T | 6   | 3  | --     | --   |
|            | Ca(ICC2/PI489777)SNP_11036 | 869  | A | T | 5   | 4  | --     | --   |
|            | Ca(ICC2/PI489777)SNP_11037 | 1821 | G | A | 3   | 6  | --     | --   |
|            | Ca(ICC2/PI489777)SNP_11038 | 2031 | G | C | 4   | 6  | --     | --   |
|            | Ca(ICC2/PI489777)SNP_11039 | 2052 | A | G | 4   | 6  | --     | --   |
| CakTC42681 | Ca(ICC2/PI489777)SNP_11040 | 248  | G | A | 5   | 3  | --     | --   |
|            | Ca(ICC2/PI489777)SNP_11041 | 954  | G | A | 11  | 9  | --     | --   |
|            | Ca(ICC2/PI489777)SNP_11042 | 1576 | G | A | 5   | 4  | --     | --   |
| CakTC37630 | Ca(ICC2/PI489777)SNP_11043 | 163  | G | T | 61  | 17 | --     | --   |
|            | Ca(ICC2/PI489777)SNP_11044 | 181  | A | C | 92  | 20 | --     | --   |
|            | Ca(ICC2/PI489777)SNP_11045 | 431  | C | T | 157 | 36 | --     | --   |
|            | Ca(ICC2/PI489777)SNP_11046 | 1214 | C | T | 58  | 5  | --     | --   |
|            | Ca(ICC2/PI489777)SNP_11047 | 1215 | T | C | 48  | 5  | --     | --   |
| CakTC24288 | Ca(ICC2/PI489777)SNP_11048 | 148  | G | A | 4   | 5  | --     | --   |
|            | Ca(ICC2/PI489777)SNP_11049 | 153  | C | T | 4   | 5  | --     | --   |
|            | Ca(ICC2/PI489777)SNP_11050 | 265  | G | A | 5   | 5  | --     | --   |
|            | Ca(ICC2/PI489777)SNP_11051 | 354  | T | A | 4   | 6  | --     | --   |
|            | Ca(ICC2/PI489777)SNP_11052 | 408  | T | G | 4   | 6  | --     | --   |
| CakTC37220 | Ca(ICC2/PI489777)SNP_11053 | 735  | T | C | 10  | 5  | --     | --   |
|            | Ca(ICC2/PI489777)SNP_11054 | 825  | T | C | 3   | 4  | --     | --   |
| CakTC15949 | Ca(ICC2/PI489777)SNP_11055 | 285  | C | T | 4   | 4  | --     | --   |
| CakTC38642 | Ca(ICC2/PI489777)SNP_11056 | 368  | C | T | 15  | 7  | --     | --   |
| CakTC31500 | Ca(ICC2/PI489777)SNP_11057 | 2590 | G | A | 6   | 3  | --     | --   |
|            | Ca(ICC2/PI489777)SNP_11058 | 3236 | T | C | 3   | 8  | --     | --   |
| CakTC24866 | Ca(ICC2/PI489777)SNP_11059 | 203  | C | T | 16  | 9  | --     | ARF  |
|            | Ca(ICC2/PI489777)SNP_11060 | 571  | T | C | 17  | 12 | --     | ARF  |
|            | Ca(ICC2/PI489777)SNP_11061 | 2527 | G | T | 18  | 15 | --     | ARF  |
|            | Ca(ICC2/PI489777)SNP_11062 | 2649 | G | C | 17  | 13 | --     | ARF  |
| CakTC29444 | Ca(ICC2/PI489777)SNP_11063 | 1819 | T | C | 19  | 7  | --     | --   |
| CakTC42125 | Ca(ICC2/PI489777)SNP_11064 | 286  | G | A | 3   | 22 | --     | --   |
|            | Ca(ICC2/PI489777)SNP_11065 | 360  | G | A | 3   | 21 | --     | --   |
| CakTC11098 | Ca(ICC2/PI489777)SNP_11066 | 45   | T | C | 5   | 4  | --     | --   |
|            | Ca(ICC2/PI489777)SNP_11067 | 269  | G | A | 19  | 11 | --     | --   |
|            | Ca(ICC2/PI489777)SNP_11068 | 860  | G | A | 15  | 5  | --     | --   |
| CakTC39121 | Ca(ICC2/PI489777)SNP_11069 | 721  | G | A | 9   | 6  | --     | --   |
| CakTC33476 | Ca(ICC2/PI489777)SNP_11070 | 162  | C | G | 14  | 12 | --     | --   |
|            | Ca(ICC2/PI489777)SNP_11071 | 607  | T | G | 9   | 7  | --     | --   |
|            | Ca(ICC2/PI489777)SNP_11072 | 639  | G | C | 3   | 6  | --     | --   |
|            | Ca(ICC2/PI489777)SNP_11073 | 651  | A | C | 3   | 6  | --     | --   |
| CakTC33330 | Ca(ICC2/PI489777)SNP_11074 | 262  | G | A | 10  | 7  | --     | --   |
|            | Ca(ICC2/PI489777)SNP_11075 | 479  | T | G | 9   | 6  | --     | --   |
|            | Ca(ICC2/PI489777)SNP_11076 | 493  | G | A | 9   | 5  | --     | --   |
|            | Ca(ICC2/PI489777)SNP_11077 | 595  | C | T | 5   | 4  | --     | --   |
| CakTC38917 | Ca(ICC2/PI489777)SNP_11078 | 215  | T | C | 4   | 5  | --     | --   |
|            | Ca(ICC2/PI489777)SNP_11079 | 496  | C | A | 24  | 26 | --     | --   |
|            | Ca(ICC2/PI489777)SNP_11080 | 742  | T | C | 16  | 20 | --     | --   |
|            | Ca(ICC2/PI489777)SNP_11081 | 808  | C | T | 15  | 17 | --     | --   |
|            | Ca(ICC2/PI489777)SNP_11082 | 814  | C | T | 15  | 16 | --     | --   |
|            | Ca(ICC2/PI489777)SNP_11083 | 1324 | G | A | 6   | 19 | --     | --   |
| CakTC29651 | Ca(ICC2/PI489777)SNP_11084 | 752  | C | T | 44  | 17 | --     | --   |
|            | Ca(ICC2/PI489777)SNP_11085 | 836  | T | C | 52  | 20 | --     | --   |
|            | Ca(ICC2/PI489777)SNP_11086 | 1070 | G | A | 23  | 19 | --     | --   |
| CakTC08095 | Ca(ICC2/PI489777)SNP_11087 | 1056 | T | C | 84  | 18 | --     | --   |
| CakTC43068 | Ca(ICC2/PI489777)SNP_11088 | 459  | C | G | 12  | 16 | --     | --   |
| CakTC31489 | Ca(ICC2/PI489777)SNP_11089 | 659  | T | C | 4   | 5  | --     | --   |
|            | Ca(ICC2/PI489777)SNP_11090 | 1076 | T | G | 3   | 5  | --     | --   |
| CakTC42607 | Ca(ICC2/PI489777)SNP_11091 | 744  | G | T | 38  | 23 | Mature | Leaf |
|            | Ca(ICC2/PI489777)SNP_11092 | 993  | T | C | 18  | 30 | Mature | Leaf |
| CakTC30968 | Ca(ICC2/PI489777)SNP_11093 | 338  | G | C | 7   | 5  | --     | --   |
| CakTC41408 | Ca(ICC2/PI489777)SNP_11094 | 371  | C | A | 12  | 10 | --     | --   |
| CakTC24124 | Ca(ICC2/PI489777)SNP_11095 | 1105 | T | C | 35  | 14 | --     | --   |

|            |                             |      |   |   |    |    |           |         |
|------------|-----------------------------|------|---|---|----|----|-----------|---------|
|            | Ca(ICCV2/PI489777)SNP_11096 | 1308 | A | T | 26 | 5  | --        | --      |
| CakTC24268 | Ca(ICCV2/PI489777)SNP_11097 | 182  | C | T | 4  | 3  | Shoot     | --      |
|            | Ca(ICCV2/PI489777)SNP_11098 | 201  | G | C | 3  | 3  | Shoot     | --      |
| CakTC24998 | Ca(ICCV2/PI489777)SNP_11099 | 1209 | C | T | 38 | 32 | --        | --      |
| CakTC31883 | Ca(ICCV2/PI489777)SNP_11100 | 1521 | C | T | 6  | 3  | --        | --      |
| CakTC31694 | Ca(ICCV2/PI489777)SNP_11101 | 413  | T | C | 6  | 4  | --        | --      |
| CakTC41172 | Ca(ICCV2/PI489777)SNP_11102 | 537  | T | C | 12 | 13 | --        | --      |
|            | Ca(ICCV2/PI489777)SNP_11103 | 726  | T | C | 22 | 8  | --        | --      |
|            | Ca(ICCV2/PI489777)SNP_11104 | 801  | T | C | 23 | 11 | --        | --      |
|            | Ca(ICCV2/PI489777)SNP_11105 | 1140 | A | G | 20 | 3  | --        | --      |
|            | Ca(ICCV2/PI489777)SNP_11106 | 1998 | G | T | 17 | 14 | --        | --      |
|            | Ca(ICCV2/PI489777)SNP_11107 | 2020 | A | G | 16 | 5  | --        | --      |
|            | Ca(ICCV2/PI489777)SNP_11108 | 2023 | C | G | 15 | 5  | --        | --      |
|            | Ca(ICCV2/PI489777)SNP_11109 | 2076 | A | G | 13 | 9  | --        | --      |
| CakTC10743 | Ca(ICCV2/PI489777)SNP_11110 | 372  | C | T | 11 | 7  | --        | --      |
|            | Ca(ICCV2/PI489777)SNP_11111 | 378  | T | A | 9  | 6  | --        | --      |
|            | Ca(ICCV2/PI489777)SNP_11112 | 527  | C | A | 9  | 9  | --        | --      |
|            | Ca(ICCV2/PI489777)SNP_11113 | 1480 | A | G | 4  | 3  | --        | --      |
| CakTC03575 | Ca(ICCV2/PI489777)SNP_11114 | 95   | T | C | 4  | 3  | --        | --      |
|            | Ca(ICCV2/PI489777)SNP_11115 | 153  | G | A | 7  | 3  | --        | --      |
| CakTC32779 | Ca(ICCV2/PI489777)SNP_11116 | 1086 | C | T | 19 | 7  | --        | --      |
|            | Ca(ICCV2/PI489777)SNP_11117 | 1525 | G | A | 25 | 11 | --        | --      |
|            | Ca(ICCV2/PI489777)SNP_11118 | 1606 | G | C | 30 | 11 | --        | --      |
|            | Ca(ICCV2/PI489777)SNP_11119 | 2857 | G | C | 8  | 3  | --        | --      |
| CakTC38282 | Ca(ICCV2/PI489777)SNP_11120 | 35   | C | A | 21 | 18 | --        | --      |
|            | Ca(ICCV2/PI489777)SNP_11121 | 730  | T | G | 60 | 33 | --        | --      |
|            | Ca(ICCV2/PI489777)SNP_11122 | 733  | A | T | 57 | 33 | --        | --      |
| CakTC33159 | Ca(ICCV2/PI489777)SNP_11123 | 652  | C | T | 6  | 15 | --        | --      |
|            | Ca(ICCV2/PI489777)SNP_11124 | 766  | G | A | 8  | 9  | --        | --      |
|            | Ca(ICCV2/PI489777)SNP_11125 | 1886 | C | T | 3  | 7  | --        | --      |
| CakTC26512 | Ca(ICCV2/PI489777)SNP_11126 | 199  | A | C | 11 | 3  | --        | E2F-DP  |
|            | Ca(ICCV2/PI489777)SNP_11127 | 1183 | T | A | 14 | 5  | --        | E2F-DP  |
| CakTC37806 | Ca(ICCV2/PI489777)SNP_11128 | 990  | T | C | 20 | 23 | --        | --      |
|            | Ca(ICCV2/PI489777)SNP_11129 | 1009 | T | C | 16 | 22 | --        | --      |
| CakTC11460 | Ca(ICCV2/PI489777)SNP_11130 | 983  | A | G | 5  | 6  | --        | --      |
|            | Ca(ICCV2/PI489777)SNP_11131 | 1011 | T | A | 4  | 8  | --        | --      |
|            | Ca(ICCV2/PI489777)SNP_11132 | 1397 | T | C | 4  | 6  | --        | --      |
|            | Ca(ICCV2/PI489777)SNP_11133 | 1511 | A | G | 4  | 6  | --        | --      |
|            | Ca(ICCV2/PI489777)SNP_11134 | 1586 | C | T | 4  | 6  | --        | --      |
| CakTC38204 | Ca(ICCV2/PI489777)SNP_11135 | 477  | A | G | 6  | 7  | --        | --      |
|            | Ca(ICCV2/PI489777)SNP_11136 | 1993 | G | T | 6  | 4  | --        | --      |
| CakTC40341 | Ca(ICCV2/PI489777)SNP_11137 | 471  | A | G | 3  | 3  | --        | --      |
| CakTC37686 | Ca(ICCV2/PI489777)SNP_11138 | 855  | T | C | 40 | 20 | --        | HB      |
|            | Ca(ICCV2/PI489777)SNP_11139 | 1019 | A | G | 29 | 15 | --        | HB      |
|            | Ca(ICCV2/PI489777)SNP_11140 | 1157 | A | T | 16 | 8  | --        | HB      |
| CakTC41780 | Ca(ICCV2/PI489777)SNP_11141 | 104  | A | C | 28 | 20 | --        | --      |
|            | Ca(ICCV2/PI489777)SNP_11142 | 223  | T | C | 39 | 25 | --        | --      |
|            | Ca(ICCV2/PI489777)SNP_11143 | 304  | G | A | 37 | 26 | --        | --      |
| CakTC31724 | Ca(ICCV2/PI489777)SNP_11144 | 480  | T | A | 4  | 16 | --        | --      |
|            | Ca(ICCV2/PI489777)SNP_11145 | 630  | T | C | 3  | 15 | --        | --      |
| CakTC26919 | Ca(ICCV2/PI489777)SNP_11146 | 845  | G | A | 4  | 4  | Young_pod | --      |
| CakTC37229 | Ca(ICCV2/PI489777)SNP_11147 | 474  | C | T | 6  | 4  | --        | --      |
|            | Ca(ICCV2/PI489777)SNP_11148 | 540  | A | G | 5  | 4  | --        | --      |
|            | Ca(ICCV2/PI489777)SNP_11149 | 573  | T | A | 4  | 4  | --        | --      |
|            | Ca(ICCV2/PI489777)SNP_11150 | 575  | A | G | 4  | 4  | --        | --      |
|            | Ca(ICCV2/PI489777)SNP_11151 | 896  | A | C | 3  | 3  | --        | --      |
| CakTC12248 | Ca(ICCV2/PI489777)SNP_11152 | 208  | T | G | 31 | 6  | --        | --      |
|            | Ca(ICCV2/PI489777)SNP_11153 | 265  | C | T | 28 | 16 | --        | --      |
| CakTC15738 | Ca(ICCV2/PI489777)SNP_11154 | 1841 | C | T | 4  | 4  | --        | Jumonji |
|            | Ca(ICCV2/PI489777)SNP_11155 | 1936 | A | C | 7  | 6  | --        | Jumonji |
|            | Ca(ICCV2/PI489777)SNP_11156 | 1983 | G | C | 7  | 5  | --        | Jumonji |
| CakTC36758 | Ca(ICCV2/PI489777)SNP_11157 | 746  | C | T | 14 | 13 | --        | --      |
|            | Ca(ICCV2/PI489777)SNP_11158 | 896  | T | G | 22 | 16 | --        | --      |
|            | Ca(ICCV2/PI489777)SNP_11159 | 1123 | A | C | 22 | 30 | --        | --      |
|            | Ca(ICCV2/PI489777)SNP_11160 | 1124 | T | G | 22 | 30 | --        | --      |
|            | Ca(ICCV2/PI489777)SNP_11161 | 1676 | T | C | 27 | 22 | --        | --      |
|            | Ca(ICCV2/PI489777)SNP_11162 | 2254 | A | G | 18 | 39 | --        | --      |
|            | Ca(ICCV2/PI489777)SNP_11163 | 2657 | C | G | 5  | 10 | --        | --      |
| CakTC01763 | Ca(ICCV2/PI489777)SNP_11164 | 81   | C | T | 45 | 11 | --        | --      |
|            | Ca(ICCV2/PI489777)SNP_11165 | 204  | C | T | 53 | 10 | --        | --      |
|            | Ca(ICCV2/PI489777)SNP_11166 | 363  | T | C | 43 | 11 | --        | --      |
| CakTC33913 | Ca(ICCV2/PI489777)SNP_11167 | 774  | A | T | 3  | 7  | --        | SBP     |
| CakTC43150 | Ca(ICCV2/PI489777)SNP_11168 | 536  | A | G | 6  | 6  | --        | --      |
|            | Ca(ICCV2/PI489777)SNP_11169 | 697  | T | C | 9  | 3  | --        | --      |

|            |                            |      |   |   |    |    |           |           |
|------------|----------------------------|------|---|---|----|----|-----------|-----------|
| CakTC26370 | Ca(ICC2/PI489777)SNP_11170 | 363  | C | G | 13 | 24 | --        | --        |
|            | Ca(ICC2/PI489777)SNP_11171 | 375  | T | A | 13 | 22 | --        | --        |
|            | Ca(ICC2/PI489777)SNP_11172 | 528  | C | T | 15 | 12 | --        | --        |
|            | Ca(ICC2/PI489777)SNP_11173 | 961  | A | G | 7  | 9  | --        | --        |
|            | Ca(ICC2/PI489777)SNP_11174 | 1860 | C | T | 6  | 6  | --        | --        |
| CakTC40674 | Ca(ICC2/PI489777)SNP_11175 | 248  | G | A | 3  | 3  | --        | --        |
|            | Ca(ICC2/PI489777)SNP_11176 | 350  | T | C | 4  | 4  | --        | --        |
|            | Ca(ICC2/PI489777)SNP_11177 | 421  | C | A | 4  | 4  | --        | --        |
|            | Ca(ICC2/PI489777)SNP_11178 | 436  | C | T | 4  | 4  | --        | --        |
| CakTC42331 | Ca(ICC2/PI489777)SNP_11179 | 352  | A | G | 24 | 23 | --        | --        |
|            | Ca(ICC2/PI489777)SNP_11180 | 357  | A | T | 28 | 24 | --        | --        |
|            | Ca(ICC2/PI489777)SNP_11181 | 369  | A | G | 34 | 25 | --        | --        |
|            | Ca(ICC2/PI489777)SNP_11182 | 380  | T | C | 33 | 28 | --        | --        |
|            | Ca(ICC2/PI489777)SNP_11183 | 406  | C | G | 38 | 28 | --        | --        |
|            | Ca(ICC2/PI489777)SNP_11184 | 419  | A | G | 43 | 25 | --        | --        |
|            | Ca(ICC2/PI489777)SNP_11185 | 692  | T | A | 21 | 22 | --        | --        |
|            | Ca(ICC2/PI489777)SNP_11186 | 750  | T | C | 5  | 7  | --        | --        |
| CakTC25593 | Ca(ICC2/PI489777)SNP_11187 | 292  | G | T | 77 | 22 | --        | --        |
|            | Ca(ICC2/PI489777)SNP_11188 | 814  | T | C | 75 | 43 | --        | --        |
| CakTC38331 | Ca(ICC2/PI489777)SNP_11189 | 545  | T | C | 15 | 5  | Young_pod | --        |
|            | Ca(ICC2/PI489777)SNP_11190 | 659  | G | A | 16 | 5  | Young_pod | --        |
|            | Ca(ICC2/PI489777)SNP_11191 | 830  | A | C | 24 | 5  | Young_pod | --        |
|            | Ca(ICC2/PI489777)SNP_11192 | 917  | C | G | 30 | 5  | Young_pod | --        |
|            | Ca(ICC2/PI489777)SNP_11193 | 918  | T | C | 27 | 5  | Young_pod | --        |
|            | Ca(ICC2/PI489777)SNP_11194 | 1089 | T | A | 22 | 5  | Young_pod | --        |
| CakTC34300 | Ca(ICC2/PI489777)SNP_11195 | 321  | G | C | 13 | 12 | Shoot     | --        |
| CakTC23802 | Ca(ICC2/PI489777)SNP_11196 | 181  | G | C | 29 | 3  | --        | --        |
| CakTC26225 | Ca(ICC2/PI489777)SNP_11197 | 756  | C | G | 99 | 33 | --        | --        |
| CakTC24299 | Ca(ICC2/PI489777)SNP_11198 | 603  | G | A | 18 | 10 | --        | --        |
|            | Ca(ICC2/PI489777)SNP_11199 | 813  | G | A | 16 | 9  | --        | --        |
|            | Ca(ICC2/PI489777)SNP_11200 | 948  | C | T | 12 | 12 | --        | --        |
|            | Ca(ICC2/PI489777)SNP_11201 | 1095 | C | T | 6  | 13 | --        | --        |
|            | Ca(ICC2/PI489777)SNP_11202 | 1500 | T | A | 5  | 4  | --        | --        |
| CakTC41816 | Ca(ICC2/PI489777)SNP_11203 | 291  | C | G | 4  | 3  | --        | S1Fa-like |
|            | Ca(ICC2/PI489777)SNP_11204 | 822  | G | A | 7  | 3  | --        | S1Fa-like |
|            | Ca(ICC2/PI489777)SNP_11205 | 888  | G | A | 7  | 4  | --        | S1Fa-like |
|            | Ca(ICC2/PI489777)SNP_11206 | 999  | G | A | 11 | 7  | --        | S1Fa-like |
| CakTC38525 | Ca(ICC2/PI489777)SNP_11207 | 823  | T | C | 11 | 6  | --        | --        |
|            | Ca(ICC2/PI489777)SNP_11208 | 1216 | A | G | 9  | 3  | --        | --        |
| CakTC26299 | Ca(ICC2/PI489777)SNP_11209 | 351  | T | C | 13 | 10 | --        | MADS      |
|            | Ca(ICC2/PI489777)SNP_11210 | 393  | T | C | 11 | 11 | --        | MADS      |
| CakTC42827 | Ca(ICC2/PI489777)SNP_11211 | 527  | C | T | 5  | 9  | --        | --        |
|            | Ca(ICC2/PI489777)SNP_11212 | 699  | A | G | 4  | 10 | --        | --        |
|            | Ca(ICC2/PI489777)SNP_11213 | 1732 | G | A | 3  | 5  | --        | --        |
| CakTC35087 | Ca(ICC2/PI489777)SNP_11214 | 664  | G | C | 12 | 5  | --        | --        |
|            | Ca(ICC2/PI489777)SNP_11215 | 805  | A | G | 11 | 5  | --        | --        |
|            | Ca(ICC2/PI489777)SNP_11216 | 974  | A | G | 16 | 4  | --        | --        |
|            | Ca(ICC2/PI489777)SNP_11217 | 1096 | G | A | 12 | 4  | --        | --        |
|            | Ca(ICC2/PI489777)SNP_11218 | 1306 | C | T | 25 | 9  | --        | --        |
|            | Ca(ICC2/PI489777)SNP_11219 | 2393 | G | C | 5  | 4  | --        | --        |
|            | Ca(ICC2/PI489777)SNP_11220 | 2520 | G | T | 5  | 6  | --        | --        |
| CakTC40062 | Ca(ICC2/PI489777)SNP_11221 | 982  | A | G | 19 | 10 | --        | --        |
| CakTC25761 | Ca(ICC2/PI489777)SNP_11222 | 342  | C | T | 9  | 8  | Young_pod | --        |
|            | Ca(ICC2/PI489777)SNP_11223 | 724  | C | T | 14 | 3  | Young_pod | --        |
|            | Ca(ICC2/PI489777)SNP_11224 | 1723 | A | G | 9  | 5  | Young_pod | --        |
|            | Ca(ICC2/PI489777)SNP_11225 | 1843 | T | C | 8  | 3  | Young_pod | --        |
|            | Ca(ICC2/PI489777)SNP_11226 | 2033 | A | T | 11 | 7  | Young_pod | --        |
| CakTC24251 | Ca(ICC2/PI489777)SNP_11227 | 564  | C | T | 7  | 4  | --        | --        |
|            | Ca(ICC2/PI489777)SNP_11228 | 1599 | C | T | 15 | 6  | --        | --        |
|            | Ca(ICC2/PI489777)SNP_11229 | 1704 | C | G | 14 | 4  | --        | --        |
|            | Ca(ICC2/PI489777)SNP_11230 | 1800 | T | C | 8  | 4  | --        | --        |
|            | Ca(ICC2/PI489777)SNP_11231 | 3433 | A | C | 8  | 4  | --        | --        |
| CakTC40523 | Ca(ICC2/PI489777)SNP_11232 | 482  | C | T | 25 | 6  | --        | --        |
|            | Ca(ICC2/PI489777)SNP_11233 | 535  | C | T | 23 | 6  | --        | --        |
|            | Ca(ICC2/PI489777)SNP_11234 | 552  | T | G | 20 | 5  | --        | --        |
|            | Ca(ICC2/PI489777)SNP_11235 | 558  | A | G | 20 | 5  | --        | --        |
| CakTC29034 | Ca(ICC2/PI489777)SNP_11236 | 558  | C | A | 23 | 3  | --        | --        |
|            | Ca(ICC2/PI489777)SNP_11237 | 660  | C | A | 21 | 7  | --        | --        |
|            | Ca(ICC2/PI489777)SNP_11238 | 663  | T | A | 21 | 7  | --        | --        |
|            | Ca(ICC2/PI489777)SNP_11239 | 742  | G | C | 21 | 7  | --        | --        |
|            | Ca(ICC2/PI489777)SNP_11240 | 927  | T | C | 18 | 7  | --        | --        |
|            | Ca(ICC2/PI489777)SNP_11241 | 1158 | G | C | 33 | 8  | --        | --        |
| CakTC38687 | Ca(ICC2/PI489777)SNP_11242 | 159  | T | C | 8  | 3  | --        | --        |
|            | Ca(ICC2/PI489777)SNP_11243 | 168  | C | T | 7  | 3  | --        | --        |



|            |                            |      |   |   |    |    |    |      |
|------------|----------------------------|------|---|---|----|----|----|------|
|            | Ca(ICC2/PI489777)SNP_11244 | 329  | T | G | 13 | 4  | -- | --   |
|            | Ca(ICC2/PI489777)SNP_11245 | 382  | A | G | 13 | 3  | -- | --   |
|            | Ca(ICC2/PI489777)SNP_11246 | 390  | A | C | 13 | 4  | -- | --   |
|            | Ca(ICC2/PI489777)SNP_11247 | 418  | T | A | 15 | 3  | -- | --   |
|            | Ca(ICC2/PI489777)SNP_11248 | 648  | G | T | 13 | 3  | -- | --   |
|            | Ca(ICC2/PI489777)SNP_11249 | 687  | G | A | 11 | 4  | -- | --   |
|            | Ca(ICC2/PI489777)SNP_11250 | 831  | A | G | 11 | 4  | -- | --   |
|            | Ca(ICC2/PI489777)SNP_11251 | 843  | G | A | 11 | 4  | -- | --   |
|            | Ca(ICC2/PI489777)SNP_11252 | 894  | A | G | 11 | 4  | -- | --   |
|            | Ca(ICC2/PI489777)SNP_11253 | 966  | G | A | 12 | 5  | -- | --   |
|            | Ca(ICC2/PI489777)SNP_11254 | 1242 | T | C | 9  | 5  | -- | --   |
|            | Ca(ICC2/PI489777)SNP_11255 | 1245 | G | A | 11 | 5  | -- | --   |
|            | Ca(ICC2/PI489777)SNP_11256 | 1280 | C | T | 15 | 5  | -- | --   |
|            | Ca(ICC2/PI489777)SNP_11257 | 1371 | C | T | 13 | 8  | -- | --   |
|            | Ca(ICC2/PI489777)SNP_11258 | 1564 | G | T | 9  | 11 | -- | --   |
|            | Ca(ICC2/PI489777)SNP_11259 | 1572 | G | A | 10 | 11 | -- | --   |
| CakTC43280 | Ca(ICC2/PI489777)SNP_11260 | 1259 | G | A | 18 | 10 | -- | --   |
| CakTC37866 | Ca(ICC2/PI489777)SNP_11261 | 211  | A | T | 25 | 25 | -- | --   |
|            | Ca(ICC2/PI489777)SNP_11262 | 1554 | T | C | 13 | 8  | -- | --   |
|            | Ca(ICC2/PI489777)SNP_11263 | 1563 | C | T | 12 | 8  | -- | --   |
|            | Ca(ICC2/PI489777)SNP_11264 | 1604 | C | G | 3  | 6  | -- | --   |
| CakTC31291 | Ca(ICC2/PI489777)SNP_11265 | 2175 | A | C | 13 | 7  | -- | --   |
| CakTC39694 | Ca(ICC2/PI489777)SNP_11266 | 806  | A | G | 7  | 4  | -- | --   |
| CakTC14057 | Ca(ICC2/PI489777)SNP_11267 | 284  | G | A | 7  | 6  | -- | --   |
| CakTC28481 | Ca(ICC2/PI489777)SNP_11268 | 862  | G | A | 5  | 3  | -- | --   |
|            | Ca(ICC2/PI489777)SNP_11269 | 1275 | C | T | 8  | 3  | -- | --   |
|            | Ca(ICC2/PI489777)SNP_11270 | 2986 | C | T | 5  | 5  | -- | --   |
| CakTC28039 | Ca(ICC2/PI489777)SNP_11271 | 989  | A | G | 15 | 5  | -- | --   |
|            | Ca(ICC2/PI489777)SNP_11272 | 1028 | T | A | 10 | 5  | -- | --   |
|            | Ca(ICC2/PI489777)SNP_11273 | 1090 | A | G | 11 | 5  | -- | --   |
|            | Ca(ICC2/PI489777)SNP_11274 | 1589 | T | A | 6  | 7  | -- | --   |
|            | Ca(ICC2/PI489777)SNP_11275 | 1590 | T | C | 6  | 7  | -- | --   |
|            | Ca(ICC2/PI489777)SNP_11276 | 1722 | T | A | 9  | 4  | -- | --   |
|            | Ca(ICC2/PI489777)SNP_11277 | 1843 | G | A | 15 | 12 | -- | --   |
|            | Ca(ICC2/PI489777)SNP_11278 | 1936 | A | G | 17 | 12 | -- | --   |
|            | Ca(ICC2/PI489777)SNP_11279 | 2149 | C | T | 19 | 12 | -- | --   |
|            | Ca(ICC2/PI489777)SNP_11280 | 2189 | C | G | 19 | 9  | -- | --   |
|            | Ca(ICC2/PI489777)SNP_11281 | 2227 | A | G | 23 | 11 | -- | --   |
|            | Ca(ICC2/PI489777)SNP_11282 | 2246 | G | C | 22 | 10 | -- | --   |
|            | Ca(ICC2/PI489777)SNP_11283 | 2258 | A | G | 18 | 5  | -- | --   |
|            | Ca(ICC2/PI489777)SNP_11284 | 2505 | A | G | 10 | 6  | -- | --   |
|            | Ca(ICC2/PI489777)SNP_11285 | 2746 | C | A | 7  | 6  | -- | --   |
| CakTC32877 | Ca(ICC2/PI489777)SNP_11286 | 1070 | T | C | 19 | 12 | -- | --   |
| CakTC31141 | Ca(ICC2/PI489777)SNP_11287 | 2057 | T | G | 14 | 12 | -- | --   |
|            | Ca(ICC2/PI489777)SNP_11288 | 2390 | T | C | 3  | 3  | -- | --   |
| CakTC14072 | Ca(ICC2/PI489777)SNP_11289 | 1807 | A | G | 8  | 8  | -- | --   |
|            | Ca(ICC2/PI489777)SNP_11290 | 1843 | A | G | 5  | 8  | -- | --   |
| CakTC02406 | Ca(ICC2/PI489777)SNP_11291 | 981  | T | C | 5  | 7  | -- | --   |
| CakTC01069 | Ca(ICC2/PI489777)SNP_11292 | 953  | C | T | 8  | 19 | -- | --   |
|            | Ca(ICC2/PI489777)SNP_11293 | 1066 | A | C | 4  | 15 | -- | --   |
|            | Ca(ICC2/PI489777)SNP_11294 | 1072 | C | A | 3  | 13 | -- | --   |
|            | Ca(ICC2/PI489777)SNP_11295 | 1080 | T | G | 4  | 12 | -- | --   |
|            | Ca(ICC2/PI489777)SNP_11296 | 1087 | A | G | 4  | 9  | -- | --   |
|            | Ca(ICC2/PI489777)SNP_11297 | 1100 | G | A | 3  | 7  | -- | --   |
| CakTC25564 | Ca(ICC2/PI489777)SNP_11298 | 1415 | T | A | 5  | 4  | -- | GRAS |
| CakTC26035 | Ca(ICC2/PI489777)SNP_11299 | 779  | A | G | 22 | 15 | -- | --   |
|            | Ca(ICC2/PI489777)SNP_11300 | 2114 | A | G | 23 | 6  | -- | --   |
|            | Ca(ICC2/PI489777)SNP_11301 | 2197 | C | G | 43 | 7  | -- | --   |
| CakTC42726 | Ca(ICC2/PI489777)SNP_11302 | 53   | A | G | 7  | 3  | -- | --   |
|            | Ca(ICC2/PI489777)SNP_11303 | 319  | T | G | 11 | 3  | -- | --   |
|            | Ca(ICC2/PI489777)SNP_11304 | 377  | G | A | 10 | 5  | -- | --   |
|            | Ca(ICC2/PI489777)SNP_11305 | 534  | C | G | 6  | 3  | -- | --   |
| CakTC25206 | Ca(ICC2/PI489777)SNP_11306 | 37   | T | G | 12 | 9  | -- | --   |
|            | Ca(ICC2/PI489777)SNP_11307 | 222  | G | A | 23 | 18 | -- | --   |
|            | Ca(ICC2/PI489777)SNP_11308 | 331  | G | T | 26 | 16 | -- | --   |
|            | Ca(ICC2/PI489777)SNP_11309 | 422  | G | T | 24 | 18 | -- | --   |
|            | Ca(ICC2/PI489777)SNP_11310 | 484  | C | G | 17 | 15 | -- | --   |
|            | Ca(ICC2/PI489777)SNP_11311 | 585  | C | T | 22 | 12 | -- | --   |
| CakTC33545 | Ca(ICC2/PI489777)SNP_11312 | 474  | A | T | 4  | 7  | -- | bHLH |
|            | Ca(ICC2/PI489777)SNP_11313 | 957  | C | G | 9  | 5  | -- | bHLH |
|            | Ca(ICC2/PI489777)SNP_11314 | 1773 | A | C | 4  | 4  | -- | bHLH |
| CakTC39162 | Ca(ICC2/PI489777)SNP_11315 | 1309 | G | A | 16 | 17 | -- | --   |
|            | Ca(ICC2/PI489777)SNP_11316 | 1394 | C | A | 10 | 9  | -- | --   |
| CakTC31034 | Ca(ICC2/PI489777)SNP_11317 | 853  | G | A | 6  | 4  | -- | --   |

|            |                             |      |   |   |    |    |    |      |
|------------|-----------------------------|------|---|---|----|----|----|------|
|            | Ca(ICCV2/PI489777)SNP_11318 | 862  | T | C | 6  | 5  | -- | --   |
|            | Ca(ICCV2/PI489777)SNP_11319 | 985  | A | T | 15 | 4  | -- | --   |
|            | Ca(ICCV2/PI489777)SNP_11320 | 1075 | G | A | 14 | 7  | -- | --   |
|            | Ca(ICCV2/PI489777)SNP_11321 | 1271 | G | A | 10 | 9  | -- | --   |
|            | Ca(ICCV2/PI489777)SNP_11322 | 1406 | C | T | 9  | 7  | -- | --   |
|            | Ca(ICCV2/PI489777)SNP_11323 | 1500 | C | T | 9  | 5  | -- | --   |
|            | Ca(ICCV2/PI489777)SNP_11324 | 2473 | T | C | 6  | 8  | -- | --   |
| CakTC42223 | Ca(ICCV2/PI489777)SNP_11325 | 151  | T | C | 8  | 4  | -- | --   |
|            | Ca(ICCV2/PI489777)SNP_11326 | 335  | T | C | 23 | 7  | -- | --   |
|            | Ca(ICCV2/PI489777)SNP_11327 | 730  | G | A | 20 | 4  | -- | --   |
|            | Ca(ICCV2/PI489777)SNP_11328 | 881  | A | G | 14 | 7  | -- | --   |
|            | Ca(ICCV2/PI489777)SNP_11329 | 1741 | C | G | 3  | 3  | -- | --   |
| CakTC35612 | Ca(ICCV2/PI489777)SNP_11330 | 196  | A | C | 11 | 9  | -- | --   |
|            | Ca(ICCV2/PI489777)SNP_11331 | 381  | G | T | 12 | 11 | -- | --   |
|            | Ca(ICCV2/PI489777)SNP_11332 | 702  | T | C | 14 | 6  | -- | --   |
|            | Ca(ICCV2/PI489777)SNP_11333 | 868  | G | A | 15 | 10 | -- | --   |
|            | Ca(ICCV2/PI489777)SNP_11334 | 2163 | G | T | 25 | 26 | -- | --   |
|            | Ca(ICCV2/PI489777)SNP_11335 | 3030 | C | T | 20 | 17 | -- | --   |
|            | Ca(ICCV2/PI489777)SNP_11336 | 3426 | G | A | 25 | 30 | -- | --   |
|            | Ca(ICCV2/PI489777)SNP_11337 | 3642 | T | A | 12 | 4  | -- | --   |
| CakTC33960 | Ca(ICCV2/PI489777)SNP_11338 | 371  | C | G | 8  | 9  | -- | bHLH |
|            | Ca(ICCV2/PI489777)SNP_11339 | 376  | C | A | 11 | 8  | -- | bHLH |
|            | Ca(ICCV2/PI489777)SNP_11340 | 494  | C | G | 11 | 12 | -- | bHLH |
|            | Ca(ICCV2/PI489777)SNP_11341 | 578  | G | T | 11 | 8  | -- | bHLH |
|            | Ca(ICCV2/PI489777)SNP_11342 | 737  | T | C | 15 | 12 | -- | bHLH |
| CakTC25631 | Ca(ICCV2/PI489777)SNP_11343 | 307  | G | A | 16 | 22 | -- | --   |
|            | Ca(ICCV2/PI489777)SNP_11344 | 329  | G | A | 17 | 25 | -- | --   |
|            | Ca(ICCV2/PI489777)SNP_11345 | 334  | C | T | 21 | 26 | -- | --   |
|            | Ca(ICCV2/PI489777)SNP_11346 | 455  | G | A | 37 | 52 | -- | --   |
|            | Ca(ICCV2/PI489777)SNP_11347 | 534  | C | T | 50 | 58 | -- | --   |
|            | Ca(ICCV2/PI489777)SNP_11348 | 735  | C | T | 63 | 68 | -- | --   |
|            | Ca(ICCV2/PI489777)SNP_11349 | 1597 | G | A | 44 | 56 | -- | --   |
|            | Ca(ICCV2/PI489777)SNP_11350 | 2036 | G | A | 37 | 56 | -- | --   |
|            | Ca(ICCV2/PI489777)SNP_11351 | 2451 | G | A | 47 | 34 | -- | --   |
|            | Ca(ICCV2/PI489777)SNP_11352 | 2611 | G | A | 43 | 35 | -- | --   |
|            | Ca(ICCV2/PI489777)SNP_11353 | 2740 | A | T | 31 | 33 | -- | --   |
|            | Ca(ICCV2/PI489777)SNP_11354 | 2833 | T | C | 33 | 36 | -- | --   |
|            | Ca(ICCV2/PI489777)SNP_11355 | 2989 | T | C | 41 | 31 | -- | --   |
|            | Ca(ICCV2/PI489777)SNP_11356 | 3658 | C | G | 36 | 37 | -- | --   |
|            | Ca(ICCV2/PI489777)SNP_11357 | 3778 | A | C | 42 | 39 | -- | --   |
|            | Ca(ICCV2/PI489777)SNP_11358 | 3944 | C | T | 30 | 53 | -- | --   |
|            | Ca(ICCV2/PI489777)SNP_11359 | 4234 | T | C | 21 | 38 | -- | --   |
|            | Ca(ICCV2/PI489777)SNP_11360 | 4485 | C | G | 11 | 15 | -- | --   |
| CakTC39956 | Ca(ICCV2/PI489777)SNP_11361 | 326  | G | A | 10 | 7  | -- | --   |
|            | Ca(ICCV2/PI489777)SNP_11362 | 488  | C | T | 3  | 7  | -- | --   |
|            | Ca(ICCV2/PI489777)SNP_11363 | 812  | A | G | 16 | 6  | -- | --   |
|            | Ca(ICCV2/PI489777)SNP_11364 | 1286 | T | C | 3  | 6  | -- | --   |
| CakTC30606 | Ca(ICCV2/PI489777)SNP_11365 | 515  | C | A | 3  | 5  | -- | --   |
|            | Ca(ICCV2/PI489777)SNP_11366 | 569  | C | T | 5  | 4  | -- | --   |
|            | Ca(ICCV2/PI489777)SNP_11367 | 1046 | C | A | 3  | 4  | -- | --   |
|            | Ca(ICCV2/PI489777)SNP_11368 | 1060 | C | G | 3  | 4  | -- | --   |
| CakTC24939 | Ca(ICCV2/PI489777)SNP_11369 | 1097 | C | T | 3  | 3  | -- | Tify |
| CakTC26544 | Ca(ICCV2/PI489777)SNP_11370 | 914  | G | A | 5  | 3  | -- | --   |
|            | Ca(ICCV2/PI489777)SNP_11371 | 1512 | G | A | 10 | 5  | -- | --   |
|            | Ca(ICCV2/PI489777)SNP_11372 | 2615 | A | T | 3  | 4  | -- | --   |
|            | Ca(ICCV2/PI489777)SNP_11373 | 2723 | T | C | 3  | 3  | -- | --   |
|            | Ca(ICCV2/PI489777)SNP_11374 | 2926 | T | C | 3  | 4  | -- | --   |
|            | Ca(ICCV2/PI489777)SNP_11375 | 3697 | C | A | 7  | 3  | -- | --   |
| CakTC33843 | Ca(ICCV2/PI489777)SNP_11376 | 545  | A | C | 4  | 4  | -- | --   |
| CakTC41634 | Ca(ICCV2/PI489777)SNP_11377 | 440  | G | A | 28 | 23 | -- | --   |
| CakTC35271 | Ca(ICCV2/PI489777)SNP_11378 | 141  | T | G | 4  | 4  | -- | --   |
|            | Ca(ICCV2/PI489777)SNP_11379 | 1951 | A | G | 9  | 8  | -- | --   |
|            | Ca(ICCV2/PI489777)SNP_11380 | 2446 | C | T | 18 | 9  | -- | --   |
|            | Ca(ICCV2/PI489777)SNP_11381 | 3061 | T | G | 15 | 6  | -- | --   |
|            | Ca(ICCV2/PI489777)SNP_11382 | 3085 | T | G | 11 | 8  | -- | --   |
|            | Ca(ICCV2/PI489777)SNP_11383 | 3218 | T | G | 13 | 8  | -- | --   |
| CakTC28040 | Ca(ICCV2/PI489777)SNP_11384 | 342  | A | G | 3  | 3  | -- | --   |
| CakTC23856 | Ca(ICCV2/PI489777)SNP_11385 | 374  | G | A | 21 | 4  | -- | --   |
|            | Ca(ICCV2/PI489777)SNP_11386 | 1394 | C | T | 18 | 3  | -- | --   |
|            | Ca(ICCV2/PI489777)SNP_11387 | 1871 | G | A | 6  | 11 | -- | --   |
|            | Ca(ICCV2/PI489777)SNP_11388 | 1901 | C | T | 5  | 12 | -- | --   |
|            | Ca(ICCV2/PI489777)SNP_11389 | 2818 | G | A | 16 | 5  | -- | --   |
| CakTC24652 | Ca(ICCV2/PI489777)SNP_11390 | 1400 | T | C | 6  | 10 | -- | --   |
|            | Ca(ICCV2/PI489777)SNP_11391 | 1402 | G | A | 6  | 11 | -- | --   |

|            |                            |      |   |   |    |    |        |      |
|------------|----------------------------|------|---|---|----|----|--------|------|
|            | Ca(ICC2/PI489777)SNP_11392 | 1646 | A | T | 6  | 8  | --     | --   |
|            | Ca(ICC2/PI489777)SNP_11393 | 1731 | G | A | 3  | 6  | --     | --   |
| CakTC30048 | Ca(ICC2/PI489777)SNP_11394 | 519  | T | C | 9  | 13 | --     | --   |
| CakTC39102 | Ca(ICC2/PI489777)SNP_11395 | 1340 | T | C | 13 | 6  | --     | --   |
| CakTC37204 | Ca(ICC2/PI489777)SNP_11396 | 1167 | G | T | 13 | 13 | --     | --   |
| CakTC39065 | Ca(ICC2/PI489777)SNP_11397 | 635  | T | C | 4  | 3  | --     | --   |
|            | Ca(ICC2/PI489777)SNP_11398 | 1238 | G | A | 4  | 4  | --     | --   |
|            | Ca(ICC2/PI489777)SNP_11399 | 1274 | A | C | 5  | 4  | --     | --   |
| CakTC25774 | Ca(ICC2/PI489777)SNP_11400 | 3026 | G | A | 4  | 3  | --     | --   |
|            | Ca(ICC2/PI489777)SNP_11401 | 3929 | C | T | 4  | 3  | --     | --   |
| CakTC36665 | Ca(ICC2/PI489777)SNP_11402 | 1460 | A | G | 27 | 14 | --     | --   |
|            | Ca(ICC2/PI489777)SNP_11403 | 1595 | G | A | 34 | 13 | --     | --   |
|            | Ca(ICC2/PI489777)SNP_11404 | 2622 | A | G | 47 | 23 | --     | --   |
|            | Ca(ICC2/PI489777)SNP_11405 | 3066 | T | C | 18 | 21 | --     | --   |
|            | Ca(ICC2/PI489777)SNP_11406 | 3589 | G | T | 10 | 9  | --     | --   |
|            | Ca(ICC2/PI489777)SNP_11407 | 3624 | T | C | 11 | 7  | --     | --   |
|            | Ca(ICC2/PI489777)SNP_11408 | 3625 | G | T | 11 | 7  | --     | --   |
| CakTC32693 | Ca(ICC2/PI489777)SNP_11409 | 150  | T | G | 4  | 7  | --     | --   |
|            | Ca(ICC2/PI489777)SNP_11410 | 599  | T | A | 13 | 5  | --     | --   |
|            | Ca(ICC2/PI489777)SNP_11411 | 1060 | G | A | 5  | 7  | --     | --   |
|            | Ca(ICC2/PI489777)SNP_11412 | 1338 | T | C | 6  | 6  | --     | --   |
| CakTC40346 | Ca(ICC2/PI489777)SNP_11413 | 276  | C | T | 13 | 7  | --     | --   |
|            | Ca(ICC2/PI489777)SNP_11414 | 293  | A | T | 13 | 7  | --     | --   |
|            | Ca(ICC2/PI489777)SNP_11415 | 709  | T | C | 16 | 4  | --     | --   |
|            | Ca(ICC2/PI489777)SNP_11416 | 855  | G | A | 20 | 5  | --     | --   |
|            | Ca(ICC2/PI489777)SNP_11417 | 1500 | C | T | 21 | 4  | --     | --   |
|            | Ca(ICC2/PI489777)SNP_11418 | 1563 | T | A | 17 | 4  | --     | --   |
|            | Ca(ICC2/PI489777)SNP_11419 | 1647 | A | G | 14 | 3  | --     | --   |
|            | Ca(ICC2/PI489777)SNP_11420 | 1671 | A | C | 12 | 3  | --     | --   |
| CakTC31900 | Ca(ICC2/PI489777)SNP_11421 | 1079 | C | T | 9  | 3  | --     | --   |
|            | Ca(ICC2/PI489777)SNP_11422 | 1143 | G | A | 9  | 3  | --     | --   |
|            | Ca(ICC2/PI489777)SNP_11423 | 2066 | A | C | 4  | 4  | --     | --   |
|            | Ca(ICC2/PI489777)SNP_11424 | 2177 | T | C | 5  | 4  | --     | --   |
| CakTC40874 | Ca(ICC2/PI489777)SNP_11425 | 236  | A | G | 6  | 4  | --     | WRKY |
|            | Ca(ICC2/PI489777)SNP_11426 | 447  | T | C | 7  | 7  | --     | WRKY |
|            | Ca(ICC2/PI489777)SNP_11427 | 1013 | T | C | 21 | 7  | --     | WRKY |
|            | Ca(ICC2/PI489777)SNP_11428 | 1130 | T | C | 21 | 5  | --     | WRKY |
|            | Ca(ICC2/PI489777)SNP_11429 | 1481 | G | A | 22 | 8  | --     | WRKY |
|            | Ca(ICC2/PI489777)SNP_11430 | 1532 | A | G | 21 | 9  | --     | WRKY |
| CakTC05863 | Ca(ICC2/PI489777)SNP_11431 | 344  | A | G | 5  | 4  | --     | --   |
|            | Ca(ICC2/PI489777)SNP_11432 | 851  | G | A | 16 | 11 | --     | --   |
|            | Ca(ICC2/PI489777)SNP_11433 | 1248 | C | A | 4  | 6  | --     | --   |
|            | Ca(ICC2/PI489777)SNP_11434 | 1751 | A | T | 21 | 10 | --     | --   |
|            | Ca(ICC2/PI489777)SNP_11435 | 2406 | A | T | 15 | 9  | --     | --   |
|            | Ca(ICC2/PI489777)SNP_11436 | 2441 | G | C | 15 | 10 | --     | --   |
| CakTC10233 | Ca(ICC2/PI489777)SNP_11437 | 489  | G | T | 8  | 3  | --     | --   |
|            | Ca(ICC2/PI489777)SNP_11438 | 506  | T | A | 7  | 3  | --     | --   |
|            | Ca(ICC2/PI489777)SNP_11439 | 508  | T | G | 7  | 3  | --     | --   |
|            | Ca(ICC2/PI489777)SNP_11440 | 518  | T | C | 7  | 3  | --     | --   |
| CakTC37394 | Ca(ICC2/PI489777)SNP_11441 | 132  | G | A | 5  | 4  | --     | --   |
|            | Ca(ICC2/PI489777)SNP_11442 | 214  | G | T | 8  | 5  | --     | --   |
|            | Ca(ICC2/PI489777)SNP_11443 | 382  | C | A | 10 | 8  | --     | --   |
|            | Ca(ICC2/PI489777)SNP_11444 | 1178 | T | C | 11 | 6  | --     | --   |
|            | Ca(ICC2/PI489777)SNP_11445 | 1322 | T | C | 9  | 3  | --     | --   |
| CakTC27291 | Ca(ICC2/PI489777)SNP_11446 | 1186 | T | C | 10 | 12 | Root   | --   |
|            | Ca(ICC2/PI489777)SNP_11447 | 1228 | C | T | 4  | 12 | Root   | --   |
|            | Ca(ICC2/PI489777)SNP_11448 | 1337 | C | T | 7  | 11 | Root   | --   |
|            | Ca(ICC2/PI489777)SNP_11449 | 1429 | A | C | 6  | 7  | Root   | --   |
| CakTC29136 | Ca(ICC2/PI489777)SNP_11450 | 464  | T | C | 3  | 4  | --     | --   |
|            | Ca(ICC2/PI489777)SNP_11451 | 1067 | A | G | 6  | 8  | --     | --   |
| CakTC42162 | Ca(ICC2/PI489777)SNP_11452 | 527  | C | T | 7  | 3  | --     | --   |
| CakTC39989 | Ca(ICC2/PI489777)SNP_11453 | 86   | T | C | 4  | 6  | --     | --   |
|            | Ca(ICC2/PI489777)SNP_11454 | 125  | A | G | 6  | 7  | --     | --   |
|            | Ca(ICC2/PI489777)SNP_11455 | 374  | A | C | 7  | 10 | --     | --   |
|            | Ca(ICC2/PI489777)SNP_11456 | 855  | C | T | 5  | 8  | --     | --   |
| CakTC10121 | Ca(ICC2/PI489777)SNP_11457 | 328  | T | A | 3  | 3  | Flower | bud  |
|            | Ca(ICC2/PI489777)SNP_11458 | 548  | C | A | 11 | 7  | Flower | bud  |
|            | Ca(ICC2/PI489777)SNP_11459 | 559  | G | C | 11 | 9  | Flower | bud  |
|            | Ca(ICC2/PI489777)SNP_11460 | 571  | C | T | 11 | 9  | Flower | bud  |
|            | Ca(ICC2/PI489777)SNP_11461 | 694  | A | T | 7  | 6  | Flower | bud  |
|            | Ca(ICC2/PI489777)SNP_11462 | 802  | G | A | 4  | 5  | Flower | bud  |
| CakTC40140 | Ca(ICC2/PI489777)SNP_11463 | 830  | A | G | 9  | 5  | --     | --   |
|            | Ca(ICC2/PI489777)SNP_11464 | 1028 | A | C | 11 | 5  | --     | --   |
|            | Ca(ICC2/PI489777)SNP_11465 | 1234 | A | G | 6  | 5  | --     | --   |

|            |                            |      |   |   |    |    |       |       |
|------------|----------------------------|------|---|---|----|----|-------|-------|
|            | Ca(ICC2/PI489777)SNP_11466 | 1252 | G | C | 9  | 4  | --    | --    |
| CakTC39933 | Ca(ICC2/PI489777)SNP_11467 | 56   | T | A | 9  | 16 | --    | --    |
|            | Ca(ICC2/PI489777)SNP_11468 | 59   | A | T | 9  | 15 | --    | --    |
|            | Ca(ICC2/PI489777)SNP_11469 | 234  | C | G | 11 | 17 | --    | --    |
|            | Ca(ICC2/PI489777)SNP_11470 | 254  | A | C | 11 | 18 | --    | --    |
|            | Ca(ICC2/PI489777)SNP_11471 | 478  | T | C | 5  | 13 | --    | --    |
|            | Ca(ICC2/PI489777)SNP_11472 | 542  | T | C | 3  | 7  | --    | --    |
|            | Ca(ICC2/PI489777)SNP_11473 | 554  | C | G | 5  | 7  | --    | --    |
|            | Ca(ICC2/PI489777)SNP_11474 | 968  | T | A | 7  | 11 | --    | --    |
|            | Ca(ICC2/PI489777)SNP_11475 | 980  | A | G | 4  | 11 | --    | --    |
| CakTC33136 | Ca(ICC2/PI489777)SNP_11476 | 491  | T | G | 20 | 13 | --    | --    |
|            | Ca(ICC2/PI489777)SNP_11477 | 629  | C | A | 28 | 19 | --    | --    |
|            | Ca(ICC2/PI489777)SNP_11478 | 923  | T | C | 20 | 18 | --    | --    |
| CakTC30696 | Ca(ICC2/PI489777)SNP_11479 | 1452 | T | C | 6  | 4  | Shoot | --    |
|            | Ca(ICC2/PI489777)SNP_11480 | 1471 | A | G | 6  | 4  | Shoot | --    |
| CakTC07768 | Ca(ICC2/PI489777)SNP_11481 | 136  | T | C | 3  | 6  | --    | --    |
|            | Ca(ICC2/PI489777)SNP_11482 | 536  | A | G | 8  | 4  | --    | --    |
|            | Ca(ICC2/PI489777)SNP_11483 | 555  | T | C | 7  | 3  | --    | --    |
|            | Ca(ICC2/PI489777)SNP_11484 | 618  | C | T | 9  | 4  | --    | --    |
| CakTC41296 | Ca(ICC2/PI489777)SNP_11485 | 343  | T | A | 11 | 5  | --    | --    |
|            | Ca(ICC2/PI489777)SNP_11486 | 1371 | T | C | 11 | 3  | --    | --    |
|            | Ca(ICC2/PI489777)SNP_11487 | 2062 | C | T | 5  | 3  | --    | --    |
|            | Ca(ICC2/PI489777)SNP_11488 | 2367 | C | T | 7  | 4  | --    | --    |
| CakTC41230 | Ca(ICC2/PI489777)SNP_11489 | 468  | C | T | 10 | 12 | --    | --    |
|            | Ca(ICC2/PI489777)SNP_11490 | 752  | A | C | 10 | 8  | --    | --    |
|            | Ca(ICC2/PI489777)SNP_11491 | 809  | T | G | 16 | 6  | --    | --    |
|            | Ca(ICC2/PI489777)SNP_11492 | 854  | T | G | 17 | 4  | --    | --    |
|            | Ca(ICC2/PI489777)SNP_11493 | 947  | G | A | 19 | 3  | --    | --    |
|            | Ca(ICC2/PI489777)SNP_11494 | 1864 | G | C | 10 | 7  | --    | --    |
|            | Ca(ICC2/PI489777)SNP_11495 | 1934 | C | G | 8  | 9  | --    | --    |
|            | Ca(ICC2/PI489777)SNP_11496 | 2158 | A | G | 9  | 9  | --    | --    |
|            | Ca(ICC2/PI489777)SNP_11497 | 2247 | G | A | 8  | 9  | --    | --    |
|            | Ca(ICC2/PI489777)SNP_11498 | 2393 | T | G | 6  | 6  | --    | --    |
| CakTC29796 | Ca(ICC2/PI489777)SNP_11499 | 20   | T | C | 3  | 4  | --    | --    |
|            | Ca(ICC2/PI489777)SNP_11500 | 72   | T | C | 9  | 8  | --    | --    |
|            | Ca(ICC2/PI489777)SNP_11501 | 176  | A | T | 13 | 10 | --    | --    |
| CakTC32472 | Ca(ICC2/PI489777)SNP_11502 | 437  | G | A | 6  | 3  | --    | --    |
| CakTC42798 | Ca(ICC2/PI489777)SNP_11503 | 92   | A | G | 4  | 3  | --    | --    |
|            | Ca(ICC2/PI489777)SNP_11504 | 487  | T | C | 7  | 7  | --    | --    |
|            | Ca(ICC2/PI489777)SNP_11505 | 599  | G | A | 10 | 5  | --    | --    |
|            | Ca(ICC2/PI489777)SNP_11506 | 612  | C | G | 10 | 5  | --    | --    |
| CakTC36082 | Ca(ICC2/PI489777)SNP_11507 | 516  | C | T | 45 | 12 | --    | --    |
|            | Ca(ICC2/PI489777)SNP_11508 | 690  | C | T | 68 | 10 | --    | --    |
|            | Ca(ICC2/PI489777)SNP_11509 | 1071 | T | C | 49 | 18 | --    | --    |
|            | Ca(ICC2/PI489777)SNP_11510 | 1254 | G | A | 69 | 16 | --    | --    |
|            | Ca(ICC2/PI489777)SNP_11511 | 2070 | A | C | 50 | 10 | --    | --    |
|            | Ca(ICC2/PI489777)SNP_11512 | 2076 | C | T | 50 | 11 | --    | --    |
|            | Ca(ICC2/PI489777)SNP_11513 | 2124 | G | A | 30 | 12 | --    | --    |
|            | Ca(ICC2/PI489777)SNP_11514 | 2486 | T | G | 43 | 24 | --    | --    |
|            | Ca(ICC2/PI489777)SNP_11515 | 2490 | C | T | 43 | 24 | --    | --    |
|            | Ca(ICC2/PI489777)SNP_11516 | 2504 | T | A | 42 | 22 | --    | --    |
|            | Ca(ICC2/PI489777)SNP_11517 | 2505 | A | T | 40 | 19 | --    | --    |
| CakTC26549 | Ca(ICC2/PI489777)SNP_11518 | 237  | C | G | 11 | 6  | --    | --    |
|            | Ca(ICC2/PI489777)SNP_11519 | 834  | C | G | 14 | 3  | --    | --    |
|            | Ca(ICC2/PI489777)SNP_11520 | 998  | A | G | 13 | 3  | --    | --    |
|            | Ca(ICC2/PI489777)SNP_11521 | 1033 | A | T | 12 | 3  | --    | --    |
| CakTC41104 | Ca(ICC2/PI489777)SNP_11522 | 351  | G | T | 5  | 4  | --    | --    |
|            | Ca(ICC2/PI489777)SNP_11523 | 1881 | A | G | 5  | 5  | --    | --    |
| CakTC39013 | Ca(ICC2/PI489777)SNP_11524 | 62   | T | A | 11 | 3  | --    | --    |
|            | Ca(ICC2/PI489777)SNP_11525 | 308  | T | C | 23 | 11 | --    | --    |
| CakTC38172 | Ca(ICC2/PI489777)SNP_11526 | 486  | T | C | 4  | 6  | --    | CCAAT |
| CakTC35558 | Ca(ICC2/PI489777)SNP_11527 | 535  | T | C | 7  | 3  | --    | --    |
|            | Ca(ICC2/PI489777)SNP_11528 | 886  | C | T | 7  | 5  | --    | --    |
| CakTC22621 | Ca(ICC2/PI489777)SNP_11529 | 800  | C | T | 3  | 6  | --    | --    |
| CakTC37521 | Ca(ICC2/PI489777)SNP_11530 | 460  | A | G | 32 | 17 | --    | --    |
|            | Ca(ICC2/PI489777)SNP_11531 | 1111 | G | A | 42 | 8  | --    | --    |
| CakTC31128 | Ca(ICC2/PI489777)SNP_11532 | 1268 | G | C | 29 | 38 | --    | --    |
|            | Ca(ICC2/PI489777)SNP_11533 | 1349 | T | G | 19 | 34 | --    | --    |
| CakTC42756 | Ca(ICC2/PI489777)SNP_11534 | 206  | G | C | 12 | 12 | --    | --    |
|            | Ca(ICC2/PI489777)SNP_11535 | 271  | A | C | 17 | 14 | --    | --    |
|            | Ca(ICC2/PI489777)SNP_11536 | 278  | A | C | 17 | 14 | --    | --    |
|            | Ca(ICC2/PI489777)SNP_11537 | 1144 | T | C | 16 | 37 | --    | --    |
| CakTC40494 | Ca(ICC2/PI489777)SNP_11538 | 357  | A | C | 4  | 10 | --    | bHLH  |
|            | Ca(ICC2/PI489777)SNP_11539 | 560  | A | T | 4  | 5  | --    | bHLH  |

|            |                            |      |   |   |    |    |        |      |
|------------|----------------------------|------|---|---|----|----|--------|------|
|            | Ca(ICC2/PI489777)SNP_11540 | 744  | C | T | 11 | 5  | --     | bHLH |
| CakTC31455 | Ca(ICC2/PI489777)SNP_11541 | 416  | C | T | 3  | 3  | Flower | bud  |
|            | Ca(ICC2/PI489777)SNP_11542 | 880  | C | A | 6  | 4  | Flower | bud  |
|            | Ca(ICC2/PI489777)SNP_11543 | 962  | A | G | 6  | 10 | Flower | bud  |
| CakTC41376 | Ca(ICC2/PI489777)SNP_11544 | 36   | C | T | 3  | 3  | --     | --   |
|            | Ca(ICC2/PI489777)SNP_11545 | 95   | T | C | 4  | 4  | --     | --   |
|            | Ca(ICC2/PI489777)SNP_11546 | 581  | G | A | 4  | 3  | --     | --   |
|            | Ca(ICC2/PI489777)SNP_11547 | 641  | A | G | 3  | 3  | --     | --   |
|            | Ca(ICC2/PI489777)SNP_11548 | 2170 | T | G | 8  | 4  | --     | --   |
|            | Ca(ICC2/PI489777)SNP_11549 | 2201 | C | T | 9  | 3  | --     | --   |
| CakTC31328 | Ca(ICC2/PI489777)SNP_11550 | 90   | C | T | 5  | 5  | --     | --   |
|            | Ca(ICC2/PI489777)SNP_11551 | 169  | G | A | 5  | 4  | --     | --   |
|            | Ca(ICC2/PI489777)SNP_11552 | 280  | C | T | 5  | 4  | --     | --   |
| CakTC35683 | Ca(ICC2/PI489777)SNP_11553 | 222  | C | T | 3  | 5  | --     | GNAT |
| CakTC32160 | Ca(ICC2/PI489777)SNP_11554 | 295  | G | A | 21 | 7  | --     | --   |
|            | Ca(ICC2/PI489777)SNP_11555 | 907  | A | T | 30 | 26 | --     | --   |
| CakTC29100 | Ca(ICC2/PI489777)SNP_11556 | 1362 | T | G | 3  | 3  | --     | --   |
|            | Ca(ICC2/PI489777)SNP_11557 | 1380 | C | T | 4  | 3  | --     | --   |
|            | Ca(ICC2/PI489777)SNP_11558 | 1520 | C | T | 4  | 4  | --     | --   |
|            | Ca(ICC2/PI489777)SNP_11559 | 1551 | G | A | 3  | 3  | --     | --   |
|            | Ca(ICC2/PI489777)SNP_11560 | 1554 | C | A | 4  | 3  | --     | --   |
|            | Ca(ICC2/PI489777)SNP_11561 | 1624 | T | C | 7  | 6  | --     | --   |
|            | Ca(ICC2/PI489777)SNP_11562 | 1803 | T | C | 5  | 6  | --     | --   |
|            | Ca(ICC2/PI489777)SNP_11563 | 1968 | C | T | 5  | 3  | --     | --   |
|            | Ca(ICC2/PI489777)SNP_11564 | 2100 | C | T | 4  | 5  | --     | --   |
|            | Ca(ICC2/PI489777)SNP_11565 | 2329 | T | A | 3  | 3  | --     | --   |
| CakTC24837 | Ca(ICC2/PI489777)SNP_11566 | 1865 | G | A | 12 | 9  | --     | --   |
|            | Ca(ICC2/PI489777)SNP_11567 | 1867 | G | A | 12 | 9  | --     | --   |
|            | Ca(ICC2/PI489777)SNP_11568 | 2115 | T | G | 11 | 7  | --     | --   |
|            | Ca(ICC2/PI489777)SNP_11569 | 2116 | T | G | 11 | 7  | --     | --   |
| CakTC38183 | Ca(ICC2/PI489777)SNP_11570 | 138  | G | A | 14 | 6  | --     | --   |
|            | Ca(ICC2/PI489777)SNP_11571 | 263  | A | G | 17 | 7  | --     | --   |
|            | Ca(ICC2/PI489777)SNP_11572 | 297  | C | A | 13 | 8  | --     | --   |
|            | Ca(ICC2/PI489777)SNP_11573 | 435  | C | T | 11 | 4  | --     | --   |
|            | Ca(ICC2/PI489777)SNP_11574 | 923  | T | G | 4  | 12 | --     | --   |
| CakTC05502 | Ca(ICC2/PI489777)SNP_11575 | 153  | G | C | 19 | 10 | --     | --   |
| CakTC41288 | Ca(ICC2/PI489777)SNP_11576 | 989  | A | G | 17 | 11 | --     | WRKY |
|            | Ca(ICC2/PI489777)SNP_11577 | 1019 | T | C | 21 | 10 | --     | WRKY |
|            | Ca(ICC2/PI489777)SNP_11578 | 1355 | T | C | 30 | 10 | --     | WRKY |
|            | Ca(ICC2/PI489777)SNP_11579 | 1448 | G | A | 19 | 9  | --     | WRKY |
|            | Ca(ICC2/PI489777)SNP_11580 | 1541 | G | A | 11 | 8  | --     | WRKY |
|            | Ca(ICC2/PI489777)SNP_11581 | 1595 | G | A | 11 | 5  | --     | WRKY |
|            | Ca(ICC2/PI489777)SNP_11582 | 1696 | C | T | 7  | 9  | --     | WRKY |
|            | Ca(ICC2/PI489777)SNP_11583 | 1851 | C | T | 9  | 7  | --     | WRKY |
|            | Ca(ICC2/PI489777)SNP_11584 | 1856 | A | G | 9  | 7  | --     | WRKY |
| CakTC27020 | Ca(ICC2/PI489777)SNP_11585 | 2124 | T | C | 3  | 6  | --     | --   |
| CakTC08318 | Ca(ICC2/PI489777)SNP_11586 | 283  | C | T | 5  | 3  | --     | --   |
|            | Ca(ICC2/PI489777)SNP_11587 | 1179 | T | A | 4  | 3  | --     | --   |
| CakTC39179 | Ca(ICC2/PI489777)SNP_11588 | 575  | A | G | 26 | 10 | --     | --   |
| CakTC24265 | Ca(ICC2/PI489777)SNP_11589 | 342  | C | T | 13 | 5  | --     | --   |
| CakTC38023 | Ca(ICC2/PI489777)SNP_11590 | 167  | C | T | 19 | 8  | --     | --   |
|            | Ca(ICC2/PI489777)SNP_11591 | 559  | A | T | 17 | 8  | --     | --   |
|            | Ca(ICC2/PI489777)SNP_11592 | 571  | A | G | 18 | 11 | --     | --   |
| CakTC39479 | Ca(ICC2/PI489777)SNP_11593 | 826  | C | T | 8  | 7  | --     | --   |
|            | Ca(ICC2/PI489777)SNP_11594 | 969  | T | C | 8  | 5  | --     | --   |
| CakTC41044 | Ca(ICC2/PI489777)SNP_11595 | 234  | T | A | 36 | 16 | --     | --   |
| CakTC34413 | Ca(ICC2/PI489777)SNP_11596 | 1750 | G | A | 7  | 5  | Mature | Leaf |
|            | Ca(ICC2/PI489777)SNP_11597 | 1800 | G | A | 5  | 5  | Mature | Leaf |
| CakTC04188 | Ca(ICC2/PI489777)SNP_11598 | 465  | T | A | 4  | 4  | --     | --   |
| CakTC37577 | Ca(ICC2/PI489777)SNP_11599 | 1037 | C | T | 6  | 6  | --     | --   |
| CakTC30152 | Ca(ICC2/PI489777)SNP_11600 | 1041 | A | G | 12 | 5  | --     | --   |
| CakTC42455 | Ca(ICC2/PI489777)SNP_11601 | 416  | A | G | 33 | 12 | --     | --   |
| CakTC39430 | Ca(ICC2/PI489777)SNP_11602 | 229  | C | A | 7  | 6  | --     | --   |
|            | Ca(ICC2/PI489777)SNP_11603 | 831  | G | A | 24 | 16 | --     | --   |
|            | Ca(ICC2/PI489777)SNP_11604 | 1119 | A | C | 33 | 20 | --     | --   |
|            | Ca(ICC2/PI489777)SNP_11605 | 1136 | T | C | 21 | 16 | --     | --   |
|            | Ca(ICC2/PI489777)SNP_11606 | 1347 | A | T | 28 | 18 | --     | --   |
|            | Ca(ICC2/PI489777)SNP_11607 | 1364 | C | A | 28 | 18 | --     | --   |
|            | Ca(ICC2/PI489777)SNP_11608 | 1446 | T | A | 25 | 13 | --     | --   |
| CakTC37875 | Ca(ICC2/PI489777)SNP_11609 | 378  | T | C | 7  | 6  | --     | --   |
|            | Ca(ICC2/PI489777)SNP_11610 | 741  | C | T | 13 | 13 | --     | --   |
|            | Ca(ICC2/PI489777)SNP_11611 | 963  | T | C | 3  | 4  | --     | --   |
| CakTC29418 | Ca(ICC2/PI489777)SNP_11612 | 129  | A | C | 19 | 8  | --     | --   |
|            | Ca(ICC2/PI489777)SNP_11613 | 636  | A | T | 35 | 7  | --     | --   |

|            |                             |      |   |   |     |    |    |      |
|------------|-----------------------------|------|---|---|-----|----|----|------|
|            | Ca(ICCV2/PI489777)SNP_11614 | 888  | T | C | 37  | 6  | -- | --   |
| CakTC10981 | Ca(ICCV2/PI489777)SNP_11615 | 472  | G | A | 6   | 6  | -- | --   |
| CakTC38497 | Ca(ICCV2/PI489777)SNP_11616 | 228  | A | C | 64  | 23 | -- | --   |
| CakTC35978 | Ca(ICCV2/PI489777)SNP_11617 | 656  | C | T | 3   | 3  | -- | --   |
|            | Ca(ICCV2/PI489777)SNP_11618 | 2753 | G | A | 14  | 4  | -- | --   |
|            | Ca(ICCV2/PI489777)SNP_11619 | 2859 | G | A | 9   | 5  | -- | --   |
|            | Ca(ICCV2/PI489777)SNP_11620 | 3084 | T | C | 12  | 4  | -- | --   |
|            | Ca(ICCV2/PI489777)SNP_11621 | 3695 | T | C | 8   | 7  | -- | --   |
|            | Ca(ICCV2/PI489777)SNP_11622 | 3715 | G | A | 11  | 7  | -- | --   |
|            | Ca(ICCV2/PI489777)SNP_11623 | 3763 | G | A | 14  | 10 | -- | --   |
|            | Ca(ICCV2/PI489777)SNP_11624 | 3849 | A | C | 14  | 10 | -- | --   |
|            | Ca(ICCV2/PI489777)SNP_11625 | 4616 | G | T | 12  | 13 | -- | --   |
| CakTC26775 | Ca(ICCV2/PI489777)SNP_11626 | 854  | A | G | 7   | 11 | -- | C3H  |
|            | Ca(ICCV2/PI489777)SNP_11627 | 1386 | T | A | 10  | 3  | -- | C3H  |
|            | Ca(ICCV2/PI489777)SNP_11628 | 5153 | G | A | 17  | 9  | -- | C3H  |
| CakTC38060 | Ca(ICCV2/PI489777)SNP_11629 | 511  | A | C | 10  | 4  | -- | --   |
|            | Ca(ICCV2/PI489777)SNP_11630 | 758  | C | G | 18  | 3  | -- | --   |
|            | Ca(ICCV2/PI489777)SNP_11631 | 854  | T | C | 14  | 4  | -- | --   |
| CakTC32554 | Ca(ICCV2/PI489777)SNP_11632 | 127  | A | G | 4   | 3  | -- | --   |
|            | Ca(ICCV2/PI489777)SNP_11633 | 151  | G | C | 3   | 3  | -- | --   |
|            | Ca(ICCV2/PI489777)SNP_11634 | 897  | T | C | 9   | 3  | -- | --   |
| CakTC05636 | Ca(ICCV2/PI489777)SNP_11635 | 1049 | C | T | 4   | 3  | -- | --   |
| CakTC05326 | Ca(ICCV2/PI489777)SNP_11636 | 1263 | T | A | 4   | 7  | -- | --   |
|            | Ca(ICCV2/PI489777)SNP_11637 | 1359 | A | G | 4   | 5  | -- | --   |
| CakTC32570 | Ca(ICCV2/PI489777)SNP_11638 | 215  | C | G | 25  | 7  | -- | --   |
|            | Ca(ICCV2/PI489777)SNP_11639 | 373  | T | C | 32  | 19 | -- | --   |
|            | Ca(ICCV2/PI489777)SNP_11640 | 427  | G | A | 36  | 18 | -- | --   |
|            | Ca(ICCV2/PI489777)SNP_11641 | 1816 | T | C | 15  | 16 | -- | --   |
|            | Ca(ICCV2/PI489777)SNP_11642 | 1882 | C | G | 12  | 10 | -- | --   |
| CakTC10508 | Ca(ICCV2/PI489777)SNP_11643 | 83   | T | G | 3   | 3  | -- | --   |
| CakTC11814 | Ca(ICCV2/PI489777)SNP_11644 | 1685 | G | A | 27  | 19 | -- | TPR  |
|            | Ca(ICCV2/PI489777)SNP_11645 | 1874 | T | A | 34  | 18 | -- | TPR  |
|            | Ca(ICCV2/PI489777)SNP_11646 | 2234 | C | T | 20  | 15 | -- | TPR  |
|            | Ca(ICCV2/PI489777)SNP_11647 | 2414 | A | T | 33  | 18 | -- | TPR  |
|            | Ca(ICCV2/PI489777)SNP_11648 | 2489 | C | T | 32  | 18 | -- | TPR  |
|            | Ca(ICCV2/PI489777)SNP_11649 | 2612 | C | T | 34  | 17 | -- | TPR  |
|            | Ca(ICCV2/PI489777)SNP_11650 | 2846 | T | G | 34  | 19 | -- | TPR  |
|            | Ca(ICCV2/PI489777)SNP_11651 | 3258 | G | A | 7   | 7  | -- | TPR  |
| CakTC38302 | Ca(ICCV2/PI489777)SNP_11652 | 971  | G | A | 6   | 3  | -- | --   |
| CakTC28032 | Ca(ICCV2/PI489777)SNP_11653 | 42   | T | A | 15  | 4  | -- | --   |
|            | Ca(ICCV2/PI489777)SNP_11654 | 750  | C | T | 8   | 7  | -- | --   |
|            | Ca(ICCV2/PI489777)SNP_11655 | 774  | C | T | 11  | 8  | -- | --   |
| CakTC43281 | Ca(ICCV2/PI489777)SNP_11656 | 1281 | C | T | 7   | 3  | -- | --   |
| CakTC28599 | Ca(ICCV2/PI489777)SNP_11657 | 435  | A | G | 48  | 28 | -- | --   |
| CakTC24436 | Ca(ICCV2/PI489777)SNP_11658 | 403  | C | T | 27  | 19 | -- | --   |
|            | Ca(ICCV2/PI489777)SNP_11659 | 405  | C | A | 28  | 19 | -- | --   |
|            | Ca(ICCV2/PI489777)SNP_11660 | 596  | A | C | 59  | 21 | -- | --   |
|            | Ca(ICCV2/PI489777)SNP_11661 | 864  | G | A | 24  | 11 | -- | --   |
| CakTC34926 | Ca(ICCV2/PI489777)SNP_11662 | 699  | G | A | 12  | 5  | -- | --   |
| CakTC31242 | Ca(ICCV2/PI489777)SNP_11663 | 998  | T | C | 4   | 4  | -- | --   |
|            | Ca(ICCV2/PI489777)SNP_11664 | 1004 | T | C | 5   | 4  | -- | --   |
|            | Ca(ICCV2/PI489777)SNP_11665 | 1024 | C | T | 5   | 4  | -- | --   |
| CakTC10433 | Ca(ICCV2/PI489777)SNP_11666 | 2276 | G | A | 6   | 5  | -- | --   |
|            | Ca(ICCV2/PI489777)SNP_11667 | 2439 | G | A | 7   | 8  | -- | --   |
|            | Ca(ICCV2/PI489777)SNP_11668 | 2595 | C | T | 4   | 6  | -- | --   |
| CakTC30660 | Ca(ICCV2/PI489777)SNP_11669 | 443  | G | T | 3   | 4  | -- | WRKY |
| CakTC28047 | Ca(ICCV2/PI489777)SNP_11670 | 41   | A | G | 10  | 4  | -- | --   |
|            | Ca(ICCV2/PI489777)SNP_11671 | 512  | A | G | 41  | 25 | -- | --   |
|            | Ca(ICCV2/PI489777)SNP_11672 | 566  | G | A | 29  | 19 | -- | --   |
|            | Ca(ICCV2/PI489777)SNP_11673 | 1445 | C | T | 55  | 17 | -- | --   |
| CakTC39913 | Ca(ICCV2/PI489777)SNP_11674 | 737  | A | G | 126 | 54 | -- | --   |
|            | Ca(ICCV2/PI489777)SNP_11675 | 907  | T | C | 78  | 55 | -- | --   |
| CakTC24356 | Ca(ICCV2/PI489777)SNP_11676 | 197  | C | T | 18  | 7  | -- | --   |
|            | Ca(ICCV2/PI489777)SNP_11677 | 352  | A | G | 15  | 7  | -- | --   |
|            | Ca(ICCV2/PI489777)SNP_11678 | 1100 | T | C | 7   | 4  | -- | --   |
| CakTC31001 | Ca(ICCV2/PI489777)SNP_11679 | 1159 | C | G | 10  | 7  | -- | --   |
|            | Ca(ICCV2/PI489777)SNP_11680 | 1520 | G | C | 6   | 6  | -- | --   |
|            | Ca(ICCV2/PI489777)SNP_11681 | 1540 | A | G | 6   | 6  | -- | --   |
|            | Ca(ICCV2/PI489777)SNP_11682 | 1583 | A | G | 6   | 6  | -- | --   |
|            | Ca(ICCV2/PI489777)SNP_11683 | 1744 | C | A | 9   | 6  | -- | --   |
|            | Ca(ICCV2/PI489777)SNP_11684 | 1812 | C | T | 8   | 8  | -- | --   |
|            | Ca(ICCV2/PI489777)SNP_11685 | 1826 | A | C | 9   | 8  | -- | --   |
|            | Ca(ICCV2/PI489777)SNP_11686 | 1839 | A | G | 8   | 8  | -- | --   |
|            | Ca(ICCV2/PI489777)SNP_11687 | 1853 | G | A | 9   | 8  | -- | --   |

|            |                             |      |   |   |    |    |           |       |
|------------|-----------------------------|------|---|---|----|----|-----------|-------|
| CakTC41113 | Ca(ICCV2/PI489777)SNP_11688 | 34   | C | T | 6  | 4  | --        | --    |
|            | Ca(ICCV2/PI489777)SNP_11689 | 40   | T | A | 6  | 4  | --        | --    |
|            | Ca(ICCV2/PI489777)SNP_11690 | 405  | G | A | 14 | 8  | --        | --    |
|            | Ca(ICCV2/PI489777)SNP_11691 | 424  | T | C | 14 | 8  | --        | --    |
|            | Ca(ICCV2/PI489777)SNP_11692 | 553  | A | T | 5  | 4  | --        | --    |
| CakTC27758 | Ca(ICCV2/PI489777)SNP_11693 | 1574 | C | G | 4  | 3  | --        | --    |
|            | Ca(ICCV2/PI489777)SNP_11694 | 1610 | A | G | 4  | 3  | --        | --    |
|            | Ca(ICCV2/PI489777)SNP_11695 | 1962 | T | G | 4  | 4  | --        | --    |
|            | Ca(ICCV2/PI489777)SNP_11696 | 1983 | A | G | 3  | 5  | --        | --    |
| CakTC33283 | Ca(ICCV2/PI489777)SNP_11697 | 826  | T | G | 10 | 5  | --        | --    |
|            | Ca(ICCV2/PI489777)SNP_11698 | 1039 | T | C | 23 | 11 | --        | --    |
|            | Ca(ICCV2/PI489777)SNP_11699 | 1114 | C | T | 24 | 11 | --        | --    |
|            | Ca(ICCV2/PI489777)SNP_11700 | 1798 | C | T | 9  | 3  | --        | --    |
|            | Ca(ICCV2/PI489777)SNP_11701 | 1960 | C | T | 6  | 3  | --        | --    |
| CakTC39547 | Ca(ICCV2/PI489777)SNP_11702 | 358  | T | C | 4  | 3  | --        | --    |
| CakTC40748 | Ca(ICCV2/PI489777)SNP_11703 | 853  | A | G | 26 | 11 | --        | --    |
|            | Ca(ICCV2/PI489777)SNP_11704 | 1060 | C | G | 26 | 7  | --        | --    |
| CakTC30073 | Ca(ICCV2/PI489777)SNP_11705 | 277  | T | C | 3  | 5  | --        | --    |
| CakTC00434 | Ca(ICCV2/PI489777)SNP_11706 | 202  | A | G | 7  | 13 | --        | CCAAT |
| CakTC39198 | Ca(ICCV2/PI489777)SNP_11707 | 164  | G | T | 15 | 14 | --        | --    |
|            | Ca(ICCV2/PI489777)SNP_11708 | 778  | C | G | 14 | 13 | --        | --    |
|            | Ca(ICCV2/PI489777)SNP_11709 | 1146 | C | T | 10 | 9  | --        | --    |
|            | Ca(ICCV2/PI489777)SNP_11710 | 1182 | G | T | 12 | 10 | --        | --    |
|            | Ca(ICCV2/PI489777)SNP_11711 | 1282 | A | T | 11 | 11 | --        | --    |
|            | Ca(ICCV2/PI489777)SNP_11712 | 1295 | G | T | 9  | 12 | --        | --    |
|            | Ca(ICCV2/PI489777)SNP_11713 | 1378 | C | A | 12 | 8  | --        | --    |
| CakTC38466 | Ca(ICCV2/PI489777)SNP_11714 | 65   | T | A | 3  | 4  | --        | --    |
|            | Ca(ICCV2/PI489777)SNP_11715 | 124  | C | T | 8  | 6  | --        | --    |
|            | Ca(ICCV2/PI489777)SNP_11716 | 130  | G | A | 8  | 6  | --        | --    |
|            | Ca(ICCV2/PI489777)SNP_11717 | 150  | C | G | 10 | 7  | --        | --    |
|            | Ca(ICCV2/PI489777)SNP_11718 | 253  | T | C | 8  | 7  | --        | --    |
|            | Ca(ICCV2/PI489777)SNP_11719 | 256  | C | T | 9  | 7  | --        | --    |
|            | Ca(ICCV2/PI489777)SNP_11720 | 266  | T | C | 9  | 7  | --        | --    |
|            | Ca(ICCV2/PI489777)SNP_11721 | 301  | G | A | 11 | 6  | --        | --    |
|            | Ca(ICCV2/PI489777)SNP_11722 | 308  | T | G | 10 | 8  | --        | --    |
|            | Ca(ICCV2/PI489777)SNP_11723 | 501  | T | C | 11 | 16 | --        | --    |
|            | Ca(ICCV2/PI489777)SNP_11724 | 527  | A | G | 9  | 16 | --        | --    |
| CakTC39734 | Ca(ICCV2/PI489777)SNP_11725 | 97   | C | T | 8  | 4  | --        | --    |
|            | Ca(ICCV2/PI489777)SNP_11726 | 153  | T | A | 13 | 13 | --        | --    |
| CakTC42215 | Ca(ICCV2/PI489777)SNP_11727 | 234  | C | A | 3  | 3  | --        | --    |
|            | Ca(ICCV2/PI489777)SNP_11728 | 235  | A | C | 3  | 3  | --        | --    |
|            | Ca(ICCV2/PI489777)SNP_11729 | 467  | G | A | 10 | 4  | --        | --    |
| CakTC41994 | Ca(ICCV2/PI489777)SNP_11730 | 412  | C | T | 3  | 11 | --        | --    |
|            | Ca(ICCV2/PI489777)SNP_11731 | 799  | A | G | 3  | 5  | --        | --    |
|            | Ca(ICCV2/PI489777)SNP_11732 | 871  | T | C | 3  | 4  | --        | --    |
| CakTC11531 | Ca(ICCV2/PI489777)SNP_11733 | 786  | C | T | 6  | 3  | --        | --    |
| CakTC30041 | Ca(ICCV2/PI489777)SNP_11734 | 1360 | T | C | 8  | 8  | --        | --    |
|            | Ca(ICCV2/PI489777)SNP_11735 | 2594 | A | G | 9  | 11 | --        | --    |
| CakTC42550 | Ca(ICCV2/PI489777)SNP_11736 | 316  | C | T | 14 | 5  | --        | --    |
|            | Ca(ICCV2/PI489777)SNP_11737 | 871  | G | C | 5  | 3  | --        | --    |
| CakTC39341 | Ca(ICCV2/PI489777)SNP_11738 | 662  | G | A | 5  | 7  | --        | --    |
|            | Ca(ICCV2/PI489777)SNP_11739 | 877  | G | A | 8  | 7  | --        | --    |
| CakTC25023 | Ca(ICCV2/PI489777)SNP_11740 | 569  | G | A | 15 | 7  | Young_pod | --    |
|            | Ca(ICCV2/PI489777)SNP_11741 | 587  | G | A | 16 | 6  | Young_pod | --    |
|            | Ca(ICCV2/PI489777)SNP_11742 | 752  | T | C | 16 | 4  | Young_pod | --    |
|            | Ca(ICCV2/PI489777)SNP_11743 | 806  | A | T | 19 | 4  | Young_pod | --    |
|            | Ca(ICCV2/PI489777)SNP_11744 | 1019 | T | C | 15 | 4  | Young_pod | --    |
|            | Ca(ICCV2/PI489777)SNP_11745 | 1033 | C | T | 17 | 4  | Young_pod | --    |
|            | Ca(ICCV2/PI489777)SNP_11746 | 1079 | C | T | 16 | 4  | Young_pod | --    |
|            | Ca(ICCV2/PI489777)SNP_11747 | 1128 | A | G | 17 | 3  | Young_pod | --    |
|            | Ca(ICCV2/PI489777)SNP_11748 | 1142 | A | G | 19 | 3  | Young_pod | --    |
|            | Ca(ICCV2/PI489777)SNP_11749 | 1155 | C | A | 18 | 3  | Young_pod | --    |
|            | Ca(ICCV2/PI489777)SNP_11750 | 1202 | A | C | 9  | 3  | Young_pod | --    |
| CakTC40033 | Ca(ICCV2/PI489777)SNP_11751 | 175  | G | C | 24 | 12 | --        | --    |
|            | Ca(ICCV2/PI489777)SNP_11752 | 214  | A | C | 24 | 13 | --        | --    |
|            | Ca(ICCV2/PI489777)SNP_11753 | 492  | C | T | 35 | 18 | --        | --    |
|            | Ca(ICCV2/PI489777)SNP_11754 | 588  | C | T | 26 | 11 | --        | --    |
|            | Ca(ICCV2/PI489777)SNP_11755 | 660  | T | C | 23 | 9  | --        | --    |
|            | Ca(ICCV2/PI489777)SNP_11756 | 1424 | G | A | 12 | 3  | --        | --    |
| CakTC39857 | Ca(ICCV2/PI489777)SNP_11757 | 525  | G | T | 9  | 4  | --        | --    |
|            | Ca(ICCV2/PI489777)SNP_11758 | 1250 | T | C | 11 | 3  | --        | --    |
| CakTC03119 | Ca(ICCV2/PI489777)SNP_11759 | 560  | C | G | 6  | 7  | --        | --    |
| CakTC30286 | Ca(ICCV2/PI489777)SNP_11760 | 281  | C | A | 4  | 3  | --        | HSF   |
|            | Ca(ICCV2/PI489777)SNP_11761 | 592  | C | T | 22 | 13 | --        | HSF   |

|            |                            |      |   |   |     |    |    |      |
|------------|----------------------------|------|---|---|-----|----|----|------|
| CakTC29294 | Ca(ICC2/PI489777)SNP_11762 | 797  | G | A | 3   | 3  | -- | NAC  |
| CakTC09504 | Ca(ICC2/PI489777)SNP_11763 | 1387 | T | C | 8   | 15 | -- | --   |
|            | Ca(ICC2/PI489777)SNP_11764 | 1408 | C | A | 7   | 16 | -- | --   |
|            | Ca(ICC2/PI489777)SNP_11765 | 1546 | T | G | 9   | 14 | -- | --   |
| CakTC23362 | Ca(ICC2/PI489777)SNP_11766 | 1554 | T | C | 6   | 3  | -- | --   |
|            | Ca(ICC2/PI489777)SNP_11767 | 1633 | C | A | 6   | 3  | -- | --   |
| CakTC40044 | Ca(ICC2/PI489777)SNP_11768 | 830  | A | T | 6   | 4  | -- | --   |
|            | Ca(ICC2/PI489777)SNP_11769 | 848  | A | G | 6   | 4  | -- | --   |
|            | Ca(ICC2/PI489777)SNP_11770 | 872  | T | G | 6   | 4  | -- | --   |
|            | Ca(ICC2/PI489777)SNP_11771 | 1014 | A | C | 4   | 3  | -- | --   |
| CakTC37570 | Ca(ICC2/PI489777)SNP_11772 | 226  | C | T | 48  | 17 | -- | --   |
| CakTC39391 | Ca(ICC2/PI489777)SNP_11773 | 115  | C | A | 25  | 10 | -- | --   |
|            | Ca(ICC2/PI489777)SNP_11774 | 290  | T | C | 28  | 14 | -- | --   |
|            | Ca(ICC2/PI489777)SNP_11775 | 302  | A | G | 28  | 15 | -- | --   |
|            | Ca(ICC2/PI489777)SNP_11776 | 443  | C | T | 20  | 15 | -- | --   |
|            | Ca(ICC2/PI489777)SNP_11777 | 575  | G | A | 19  | 18 | -- | --   |
|            | Ca(ICC2/PI489777)SNP_11778 | 1195 | A | T | 13  | 13 | -- | --   |
| CakTC32939 | Ca(ICC2/PI489777)SNP_11779 | 998  | A | G | 12  | 7  | -- | --   |
|            | Ca(ICC2/PI489777)SNP_11780 | 1033 | C | A | 13  | 6  | -- | --   |
|            | Ca(ICC2/PI489777)SNP_11781 | 1096 | T | A | 10  | 6  | -- | --   |
|            | Ca(ICC2/PI489777)SNP_11782 | 1615 | T | C | 12  | 4  | -- | --   |
|            | Ca(ICC2/PI489777)SNP_11783 | 1618 | C | T | 11  | 4  | -- | --   |
|            | Ca(ICC2/PI489777)SNP_11784 | 1625 | A | G | 13  | 4  | -- | --   |
|            | Ca(ICC2/PI489777)SNP_11785 | 1708 | A | G | 13  | 5  | -- | --   |
|            | Ca(ICC2/PI489777)SNP_11786 | 1879 | T | C | 15  | 5  | -- | --   |
|            | Ca(ICC2/PI489777)SNP_11787 | 2110 | A | G | 17  | 10 | -- | --   |
|            | Ca(ICC2/PI489777)SNP_11788 | 2281 | T | A | 16  | 9  | -- | --   |
|            | Ca(ICC2/PI489777)SNP_11789 | 2317 | T | G | 15  | 9  | -- | --   |
|            | Ca(ICC2/PI489777)SNP_11790 | 2397 | G | T | 21  | 6  | -- | --   |
|            | Ca(ICC2/PI489777)SNP_11791 | 2414 | G | A | 20  | 6  | -- | --   |
|            | Ca(ICC2/PI489777)SNP_11792 | 2488 | G | A | 12  | 5  | -- | --   |
|            | Ca(ICC2/PI489777)SNP_11793 | 2698 | G | A | 8   | 3  | -- | --   |
|            | Ca(ICC2/PI489777)SNP_11794 | 2714 | A | G | 10  | 3  | -- | --   |
| CakTC24415 | Ca(ICC2/PI489777)SNP_11795 | 1087 | C | A | 5   | 6  | -- | --   |
|            | Ca(ICC2/PI489777)SNP_11796 | 1223 | C | T | 6   | 5  | -- | --   |
|            | Ca(ICC2/PI489777)SNP_11797 | 1229 | A | G | 5   | 5  | -- | --   |
|            | Ca(ICC2/PI489777)SNP_11798 | 1396 | T | A | 4   | 4  | -- | --   |
| CakTC24160 | Ca(ICC2/PI489777)SNP_11799 | 1216 | C | T | 25  | 7  | -- | --   |
|            | Ca(ICC2/PI489777)SNP_11800 | 1618 | A | G | 23  | 10 | -- | --   |
|            | Ca(ICC2/PI489777)SNP_11801 | 2170 | G | A | 15  | 7  | -- | --   |
|            | Ca(ICC2/PI489777)SNP_11802 | 2593 | C | T | 17  | 5  | -- | --   |
| CakTC09902 | Ca(ICC2/PI489777)SNP_11803 | 953  | A | C | 4   | 3  | -- | --   |
| CakTC33001 | Ca(ICC2/PI489777)SNP_11804 | 123  | T | C | 468 | 28 | -- | --   |
| CakTC11660 | Ca(ICC2/PI489777)SNP_11805 | 904  | G | C | 7   | 9  | -- | --   |
|            | Ca(ICC2/PI489777)SNP_11806 | 1266 | A | G | 3   | 5  | -- | --   |
| CakTC24813 | Ca(ICC2/PI489777)SNP_11807 | 1795 | G | A | 3   | 3  | -- | --   |
| CakTC26026 | Ca(ICC2/PI489777)SNP_11808 | 343  | T | C | 4   | 4  | -- | --   |
| CakTC05122 | Ca(ICC2/PI489777)SNP_11809 | 919  | G | T | 3   | 5  | -- | --   |
| CakTC41193 | Ca(ICC2/PI489777)SNP_11810 | 1387 | T | C | 9   | 5  | -- | --   |
|            | Ca(ICC2/PI489777)SNP_11811 | 1464 | G | C | 10  | 6  | -- | --   |
| CakTC26673 | Ca(ICC2/PI489777)SNP_11812 | 678  | T | C | 15  | 16 | -- | --   |
|            | Ca(ICC2/PI489777)SNP_11813 | 1236 | A | G | 10  | 8  | -- | --   |
|            | Ca(ICC2/PI489777)SNP_11814 | 2076 | C | G | 12  | 7  | -- | --   |
| CakTC38460 | Ca(ICC2/PI489777)SNP_11815 | 1842 | T | A | 37  | 26 | -- | --   |
| CakTC36922 | Ca(ICC2/PI489777)SNP_11816 | 472  | A | T | 6   | 13 | -- | --   |
|            | Ca(ICC2/PI489777)SNP_11817 | 1254 | T | C | 20  | 14 | -- | --   |
|            | Ca(ICC2/PI489777)SNP_11818 | 1427 | C | A | 25  | 8  | -- | --   |
|            | Ca(ICC2/PI489777)SNP_11819 | 1773 | C | G | 28  | 10 | -- | --   |
|            | Ca(ICC2/PI489777)SNP_11820 | 2219 | G | A | 17  | 11 | -- | --   |
|            | Ca(ICC2/PI489777)SNP_11821 | 2363 | T | C | 10  | 13 | -- | --   |
| CakTC34097 | Ca(ICC2/PI489777)SNP_11822 | 47   | A | G | 5   | 3  | -- | --   |
| CakTC38223 | Ca(ICC2/PI489777)SNP_11823 | 892  | G | C | 7   | 5  | -- | SAP  |
|            | Ca(ICC2/PI489777)SNP_11824 | 1223 | T | C | 3   | 5  | -- | SAP  |
| CakTC12483 | Ca(ICC2/PI489777)SNP_11825 | 387  | A | G | 7   | 4  | -- | CCHC |
|            | Ca(ICC2/PI489777)SNP_11826 | 528  | G | A | 3   | 6  | -- | CCHC |
| CakTC41311 | Ca(ICC2/PI489777)SNP_11827 | 1208 | C | G | 5   | 7  | -- | --   |
|            | Ca(ICC2/PI489777)SNP_11828 | 1541 | C | T | 5   | 9  | -- | --   |
| CakTC41128 | Ca(ICC2/PI489777)SNP_11829 | 689  | C | A | 21  | 33 | -- | --   |
|            | Ca(ICC2/PI489777)SNP_11830 | 767  | T | C | 14  | 18 | -- | --   |
|            | Ca(ICC2/PI489777)SNP_11831 | 1238 | T | C | 31  | 27 | -- | --   |
|            | Ca(ICC2/PI489777)SNP_11832 | 1739 | C | G | 26  | 18 | -- | --   |
|            | Ca(ICC2/PI489777)SNP_11833 | 2428 | A | C | 10  | 9  | -- | --   |
| CakTC37283 | Ca(ICC2/PI489777)SNP_11834 | 979  | C | T | 12  | 7  | -- | --   |
|            | Ca(ICC2/PI489777)SNP_11835 | 1099 | G | A | 10  | 9  | -- | --   |



|            |                            |      |   |   |     |     |    |    |
|------------|----------------------------|------|---|---|-----|-----|----|----|
|            | Ca(ICC2/PI489777)SNP_11836 | 1182 | G | C | 8   | 5   | -- | -- |
| CakTC22672 | Ca(ICC2/PI489777)SNP_11837 | 802  | A | G | 94  | 57  | -- | -- |
|            | Ca(ICC2/PI489777)SNP_11838 | 931  | A | G | 103 | 73  | -- | -- |
|            | Ca(ICC2/PI489777)SNP_11839 | 1179 | A | T | 95  | 69  | -- | -- |
|            | Ca(ICC2/PI489777)SNP_11840 | 1245 | A | C | 77  | 39  | -- | -- |
|            | Ca(ICC2/PI489777)SNP_11841 | 1308 | C | T | 73  | 37  | -- | -- |
| CakTC38094 | Ca(ICC2/PI489777)SNP_11842 | 727  | C | T | 3   | 3   | -- | -- |
|            | Ca(ICC2/PI489777)SNP_11843 | 893  | G | T | 3   | 5   | -- | -- |
|            | Ca(ICC2/PI489777)SNP_11844 | 973  | A | G | 3   | 3   | -- | -- |
| CakTC37417 | Ca(ICC2/PI489777)SNP_11845 | 299  | G | A | 11  | 7   | -- | -- |
|            | Ca(ICC2/PI489777)SNP_11846 | 545  | G | A | 15  | 10  | -- | -- |
|            | Ca(ICC2/PI489777)SNP_11847 | 680  | C | T | 11  | 12  | -- | -- |
|            | Ca(ICC2/PI489777)SNP_11848 | 704  | C | T | 11  | 15  | -- | -- |
|            | Ca(ICC2/PI489777)SNP_11849 | 1097 | T | C | 11  | 6   | -- | -- |
|            | Ca(ICC2/PI489777)SNP_11850 | 1100 | T | A | 11  | 5   | -- | -- |
| CakTC36367 | Ca(ICC2/PI489777)SNP_11851 | 1021 | T | G | 19  | 13  | -- | -- |
|            | Ca(ICC2/PI489777)SNP_11852 | 1446 | C | T | 15  | 12  | -- | -- |
|            | Ca(ICC2/PI489777)SNP_11853 | 1807 | G | A | 16  | 18  | -- | -- |
|            | Ca(ICC2/PI489777)SNP_11854 | 2218 | T | C | 11  | 6   | -- | -- |
|            | Ca(ICC2/PI489777)SNP_11855 | 2993 | G | A | 15  | 8   | -- | -- |
| CakTC22733 | Ca(ICC2/PI489777)SNP_11856 | 2214 | A | G | 450 | 205 | -- | -- |
|            | Ca(ICC2/PI489777)SNP_11857 | 2676 | G | C | 395 | 191 | -- | -- |
|            | Ca(ICC2/PI489777)SNP_11858 | 2785 | G | A | 235 | 111 | -- | -- |
| CakTC37943 | Ca(ICC2/PI489777)SNP_11859 | 259  | C | G | 4   | 5   | -- | -- |
|            | Ca(ICC2/PI489777)SNP_11860 | 610  | A | G | 5   | 4   | -- | -- |
| CakTC39044 | Ca(ICC2/PI489777)SNP_11861 | 1226 | A | G | 5   | 4   | -- | -- |
| CakTC29203 | Ca(ICC2/PI489777)SNP_11862 | 88   | C | T | 8   | 3   | -- | HB |
|            | Ca(ICC2/PI489777)SNP_11863 | 175  | C | T | 12  | 3   | -- | HB |
|            | Ca(ICC2/PI489777)SNP_11864 | 199  | T | A | 14  | 3   | -- | HB |
|            | Ca(ICC2/PI489777)SNP_11865 | 212  | C | G | 14  | 3   | -- | HB |
|            | Ca(ICC2/PI489777)SNP_11866 | 292  | C | T | 20  | 3   | -- | HB |
|            | Ca(ICC2/PI489777)SNP_11867 | 523  | G | A | 17  | 4   | -- | HB |
|            | Ca(ICC2/PI489777)SNP_11868 | 652  | G | T | 11  | 5   | -- | HB |
|            | Ca(ICC2/PI489777)SNP_11869 | 912  | G | C | 29  | 3   | -- | HB |
|            | Ca(ICC2/PI489777)SNP_11870 | 1302 | G | A | 24  | 7   | -- | HB |
|            | Ca(ICC2/PI489777)SNP_11871 | 1319 | T | A | 23  | 6   | -- | HB |
|            | Ca(ICC2/PI489777)SNP_11872 | 1521 | C | G | 7   | 4   | -- | HB |
|            | Ca(ICC2/PI489777)SNP_11873 | 1528 | T | A | 5   | 3   | -- | HB |
| CakTC10817 | Ca(ICC2/PI489777)SNP_11874 | 574  | C | T | 16  | 10  | -- | -- |
|            | Ca(ICC2/PI489777)SNP_11875 | 853  | C | T | 18  | 9   | -- | -- |
|            | Ca(ICC2/PI489777)SNP_11876 | 939  | T | G | 12  | 6   | -- | -- |
| CakTC23562 | Ca(ICC2/PI489777)SNP_11877 | 195  | C | G | 28  | 12  | -- | -- |
|            | Ca(ICC2/PI489777)SNP_11878 | 762  | C | T | 19  | 11  | -- | -- |
|            | Ca(ICC2/PI489777)SNP_11879 | 1831 | C | T | 20  | 15  | -- | -- |
|            | Ca(ICC2/PI489777)SNP_11880 | 2092 | C | T | 23  | 16  | -- | -- |
| CakTC43036 | Ca(ICC2/PI489777)SNP_11881 | 148  | C | T | 7   | 10  | -- | -- |
|            | Ca(ICC2/PI489777)SNP_11882 | 450  | C | G | 10  | 6   | -- | -- |
|            | Ca(ICC2/PI489777)SNP_11883 | 881  | G | A | 18  | 5   | -- | -- |
|            | Ca(ICC2/PI489777)SNP_11884 | 899  | T | C | 20  | 3   | -- | -- |
| CakTC23690 | Ca(ICC2/PI489777)SNP_11885 | 429  | A | C | 8   | 3   | -- | -- |
|            | Ca(ICC2/PI489777)SNP_11886 | 448  | C | G | 8   | 3   | -- | -- |
|            | Ca(ICC2/PI489777)SNP_11887 | 485  | C | T | 8   | 3   | -- | -- |
|            | Ca(ICC2/PI489777)SNP_11888 | 548  | C | G | 5   | 3   | -- | -- |
|            | Ca(ICC2/PI489777)SNP_11889 | 624  | A | C | 3   | 3   | -- | -- |
|            | Ca(ICC2/PI489777)SNP_11890 | 668  | C | T | 4   | 3   | -- | -- |
|            | Ca(ICC2/PI489777)SNP_11891 | 695  | A | G | 4   | 3   | -- | -- |
|            | Ca(ICC2/PI489777)SNP_11892 | 906  | A | G | 6   | 3   | -- | -- |
|            | Ca(ICC2/PI489777)SNP_11893 | 984  | T | C | 6   | 3   | -- | -- |
|            | Ca(ICC2/PI489777)SNP_11894 | 1180 | C | T | 18  | 4   | -- | -- |
| CakTC39326 | Ca(ICC2/PI489777)SNP_11895 | 1263 | G | T | 7   | 4   | -- | -- |
| CakTC37676 | Ca(ICC2/PI489777)SNP_11896 | 129  | T | A | 17  | 11  | -- | -- |
|            | Ca(ICC2/PI489777)SNP_11897 | 1042 | C | T | 15  | 15  | -- | -- |
| CakTC40030 | Ca(ICC2/PI489777)SNP_11898 | 449  | C | T | 3   | 5   | -- | -- |
|            | Ca(ICC2/PI489777)SNP_11899 | 459  | G | A | 3   | 5   | -- | -- |
|            | Ca(ICC2/PI489777)SNP_11900 | 543  | T | C | 9   | 8   | -- | -- |
|            | Ca(ICC2/PI489777)SNP_11901 | 985  | C | T | 13  | 6   | -- | -- |
|            | Ca(ICC2/PI489777)SNP_11902 | 1408 | C | T | 9   | 3   | -- | -- |
| CakTC40072 | Ca(ICC2/PI489777)SNP_11903 | 34   | C | T | 4   | 10  | -- | -- |
|            | Ca(ICC2/PI489777)SNP_11904 | 111  | A | T | 37  | 53  | -- | -- |
|            | Ca(ICC2/PI489777)SNP_11905 | 126  | C | A | 39  | 45  | -- | -- |
|            | Ca(ICC2/PI489777)SNP_11906 | 500  | G | T | 81  | 115 | -- | -- |
|            | Ca(ICC2/PI489777)SNP_11907 | 611  | T | A | 55  | 91  | -- | -- |
| CakTC34549 | Ca(ICC2/PI489777)SNP_11908 | 2010 | A | C | 3   | 14  | -- | -- |
| CakTC29183 | Ca(ICC2/PI489777)SNP_11909 | 452  | C | G | 25  | 9   | -- | -- |

|            |                            |      |   |   |     |     |      |      |
|------------|----------------------------|------|---|---|-----|-----|------|------|
|            | Ca(ICC2/PI489777)SNP_11910 | 926  | A | G | 12  | 5   | --   | --   |
|            | Ca(ICC2/PI489777)SNP_11911 | 1336 | T | C | 13  | 5   | --   | --   |
|            | Ca(ICC2/PI489777)SNP_11912 | 1476 | G | A | 9   | 8   | --   | --   |
| CakTC34068 | Ca(ICC2/PI489777)SNP_11913 | 445  | C | T | 14  | 9   | --   | --   |
|            | Ca(ICC2/PI489777)SNP_11914 | 454  | A | T | 14  | 10  | --   | --   |
| CakTC26726 | Ca(ICC2/PI489777)SNP_11915 | 2636 | A | T | 7   | 3   | Root | --   |
| CakTC40133 | Ca(ICC2/PI489777)SNP_11916 | 469  | A | G | 30  | 7   | --   | --   |
|            | Ca(ICC2/PI489777)SNP_11917 | 941  | C | G | 21  | 4   | --   | --   |
|            | Ca(ICC2/PI489777)SNP_11918 | 1179 | T | A | 18  | 5   | --   | --   |
| CakTC32603 | Ca(ICC2/PI489777)SNP_11919 | 1686 | A | G | 27  | 18  | --   | --   |
|            | Ca(ICC2/PI489777)SNP_11920 | 1692 | A | G | 28  | 18  | --   | --   |
|            | Ca(ICC2/PI489777)SNP_11921 | 1794 | G | A | 27  | 21  | --   | --   |
| CakTC40085 | Ca(ICC2/PI489777)SNP_11922 | 862  | G | T | 8   | 3   | --   | --   |
| CakTC24108 | Ca(ICC2/PI489777)SNP_11923 | 467  | A | G | 9   | 10  | --   | --   |
|            | Ca(ICC2/PI489777)SNP_11924 | 794  | T | C | 12  | 6   | --   | --   |
|            | Ca(ICC2/PI489777)SNP_11925 | 869  | A | T | 11  | 9   | --   | --   |
|            | Ca(ICC2/PI489777)SNP_11926 | 886  | C | T | 11  | 8   | --   | --   |
|            | Ca(ICC2/PI489777)SNP_11927 | 1425 | A | G | 10  | 6   | --   | --   |
|            | Ca(ICC2/PI489777)SNP_11928 | 1448 | T | A | 10  | 5   | --   | --   |
|            | Ca(ICC2/PI489777)SNP_11929 | 2344 | T | A | 126 | 91  | --   | --   |
|            | Ca(ICC2/PI489777)SNP_11930 | 2776 | T | A | 77  | 112 | --   | --   |
|            | Ca(ICC2/PI489777)SNP_11931 | 2933 | G | C | 26  | 7   | --   | --   |
|            | Ca(ICC2/PI489777)SNP_11932 | 2940 | T | C | 28  | 7   | --   | --   |
|            | Ca(ICC2/PI489777)SNP_11933 | 2946 | C | A | 26  | 7   | --   | --   |
|            | Ca(ICC2/PI489777)SNP_11934 | 2989 | C | T | 27  | 7   | --   | --   |
| CakTC38050 | Ca(ICC2/PI489777)SNP_11935 | 66   | C | T | 27  | 12  | --   | --   |
|            | Ca(ICC2/PI489777)SNP_11936 | 86   | C | T | 42  | 16  | --   | --   |
|            | Ca(ICC2/PI489777)SNP_11937 | 187  | T | A | 58  | 23  | --   | --   |
| CakTC28567 | Ca(ICC2/PI489777)SNP_11938 | 131  | T | C | 4   | 4   | --   | --   |
|            | Ca(ICC2/PI489777)SNP_11939 | 593  | A | G | 7   | 3   | --   | --   |
|            | Ca(ICC2/PI489777)SNP_11940 | 666  | T | C | 7   | 5   | --   | --   |
|            | Ca(ICC2/PI489777)SNP_11941 | 1071 | G | A | 4   | 8   | --   | --   |
| CakTC39074 | Ca(ICC2/PI489777)SNP_11942 | 1320 | C | G | 9   | 7   | --   | --   |
| CakTC39355 | Ca(ICC2/PI489777)SNP_11943 | 1334 | A | G | 8   | 7   | --   | --   |
|            | Ca(ICC2/PI489777)SNP_11944 | 1336 | A | C | 8   | 7   | --   | --   |
| CakTC39448 | Ca(ICC2/PI489777)SNP_11945 | 405  | G | C | 11  | 9   | --   | --   |
| CakTC35041 | Ca(ICC2/PI489777)SNP_11946 | 835  | A | G | 8   | 7   | --   | --   |
| CakTC05656 | Ca(ICC2/PI489777)SNP_11947 | 2244 | A | C | 3   | 4   | --   | --   |
|            | Ca(ICC2/PI489777)SNP_11948 | 2515 | C | T | 5   | 4   | --   | --   |
|            | Ca(ICC2/PI489777)SNP_11949 | 2546 | C | T | 4   | 4   | --   | --   |
| CakTC31006 | Ca(ICC2/PI489777)SNP_11950 | 1408 | G | C | 7   | 5   | --   | --   |
|            | Ca(ICC2/PI489777)SNP_11951 | 1999 | T | C | 6   | 4   | --   | --   |
|            | Ca(ICC2/PI489777)SNP_11952 | 2177 | T | C | 6   | 4   | --   | --   |
| CakTC26503 | Ca(ICC2/PI489777)SNP_11953 | 63   | A | G | 48  | 3   | --   | --   |
|            | Ca(ICC2/PI489777)SNP_11954 | 571  | A | G | 22  | 10  | --   | --   |
| CakTC39860 | Ca(ICC2/PI489777)SNP_11955 | 283  | A | T | 4   | 5   | --   | --   |
| CakTC38336 | Ca(ICC2/PI489777)SNP_11956 | 687  | T | C | 34  | 18  | --   | --   |
|            | Ca(ICC2/PI489777)SNP_11957 | 754  | T | A | 26  | 16  | --   | --   |
|            | Ca(ICC2/PI489777)SNP_11958 | 756  | T | C | 26  | 17  | --   | --   |
|            | Ca(ICC2/PI489777)SNP_11959 | 787  | A | T | 25  | 8   | --   | --   |
|            | Ca(ICC2/PI489777)SNP_11960 | 847  | A | T | 31  | 16  | --   | --   |
|            | Ca(ICC2/PI489777)SNP_11961 | 850  | T | C | 30  | 17  | --   | --   |
|            | Ca(ICC2/PI489777)SNP_11962 | 875  | A | G | 25  | 13  | --   | --   |
|            | Ca(ICC2/PI489777)SNP_11963 | 1020 | G | A | 12  | 8   | --   | --   |
| CakTC12064 | Ca(ICC2/PI489777)SNP_11964 | 2526 | T | C | 6   | 6   | --   | --   |
|            | Ca(ICC2/PI489777)SNP_11965 | 2708 | G | A | 13  | 4   | --   | --   |
| CakTC28030 | Ca(ICC2/PI489777)SNP_11966 | 497  | T | C | 24  | 28  | --   | HB   |
|            | Ca(ICC2/PI489777)SNP_11967 | 523  | G | A | 28  | 29  | --   | HB   |
|            | Ca(ICC2/PI489777)SNP_11968 | 532  | C | G | 29  | 26  | --   | HB   |
|            | Ca(ICC2/PI489777)SNP_11969 | 859  | T | A | 53  | 24  | --   | HB   |
| CakTC29906 | Ca(ICC2/PI489777)SNP_11970 | 378  | T | C | 16  | 8   | --   | --   |
|            | Ca(ICC2/PI489777)SNP_11971 | 1066 | T | G | 14  | 6   | --   | --   |
|            | Ca(ICC2/PI489777)SNP_11972 | 2574 | G | T | 25  | 11  | --   | --   |
|            | Ca(ICC2/PI489777)SNP_11973 | 2610 | A | C | 33  | 10  | --   | --   |
|            | Ca(ICC2/PI489777)SNP_11974 | 2907 | A | G | 30  | 16  | --   | --   |
|            | Ca(ICC2/PI489777)SNP_11975 | 3573 | G | T | 23  | 10  | --   | --   |
|            | Ca(ICC2/PI489777)SNP_11976 | 3576 | A | G | 23  | 10  | --   | --   |
| CakTC40007 | Ca(ICC2/PI489777)SNP_11977 | 80   | T | C | 11  | 10  | --   | WRKY |
|            | Ca(ICC2/PI489777)SNP_11978 | 91   | C | T | 18  | 10  | --   | WRKY |
|            | Ca(ICC2/PI489777)SNP_11979 | 321  | C | T | 30  | 19  | --   | WRKY |
|            | Ca(ICC2/PI489777)SNP_11980 | 330  | T | C | 32  | 19  | --   | WRKY |
|            | Ca(ICC2/PI489777)SNP_11981 | 448  | A | G | 34  | 18  | --   | WRKY |
|            | Ca(ICC2/PI489777)SNP_11982 | 498  | T | C | 29  | 16  | --   | WRKY |
|            | Ca(ICC2/PI489777)SNP_11983 | 597  | A | G | 19  | 21  | --   | WRKY |

|            |                            |      |   |   |    |    |    |          |
|------------|----------------------------|------|---|---|----|----|----|----------|
| CakTC26023 | Ca(ICC2/PI489777)SNP_11984 | 392  | G | T | 8  | 10 | -- | --       |
| CakTC31330 | Ca(ICC2/PI489777)SNP_11985 | 2607 | C | T | 21 | 3  | -- | --       |
| CakTC13673 | Ca(ICC2/PI489777)SNP_11986 | 329  | G | A | 5  | 6  | -- | --       |
|            | Ca(ICC2/PI489777)SNP_11987 | 368  | G | A | 5  | 4  | -- | --       |
| CakTC39897 | Ca(ICC2/PI489777)SNP_11988 | 850  | A | T | 9  | 4  | -- | C2C2-Dof |
|            | Ca(ICC2/PI489777)SNP_11989 | 958  | G | C | 8  | 3  | -- | C2C2-Dof |
| CakTC37078 | Ca(ICC2/PI489777)SNP_11990 | 77   | G | A | 5  | 5  | -- | --       |
|            | Ca(ICC2/PI489777)SNP_11991 | 152  | G | A | 13 | 7  | -- | --       |
|            | Ca(ICC2/PI489777)SNP_11992 | 173  | C | G | 11 | 8  | -- | --       |
|            | Ca(ICC2/PI489777)SNP_11993 | 443  | C | T | 21 | 14 | -- | --       |
|            | Ca(ICC2/PI489777)SNP_11994 | 728  | T | C | 31 | 20 | -- | --       |
|            | Ca(ICC2/PI489777)SNP_11995 | 1031 | C | T | 31 | 34 | -- | --       |
|            | Ca(ICC2/PI489777)SNP_11996 | 1100 | G | T | 25 | 41 | -- | --       |
|            | Ca(ICC2/PI489777)SNP_11997 | 1901 | G | A | 27 | 34 | -- | --       |
|            | Ca(ICC2/PI489777)SNP_11998 | 1910 | A | G | 35 | 35 | -- | --       |
|            | Ca(ICC2/PI489777)SNP_11999 | 1988 | G | C | 27 | 28 | -- | --       |
|            | Ca(ICC2/PI489777)SNP_12000 | 2258 | A | G | 14 | 14 | -- | --       |
| CakTC33120 | Ca(ICC2/PI489777)SNP_12001 | 1082 | T | C | 24 | 12 | -- | --       |
|            | Ca(ICC2/PI489777)SNP_12002 | 1089 | C | T | 21 | 12 | -- | --       |
|            | Ca(ICC2/PI489777)SNP_12003 | 1699 | G | C | 11 | 6  | -- | --       |
|            | Ca(ICC2/PI489777)SNP_12004 | 2059 | C | T | 32 | 20 | -- | --       |
|            | Ca(ICC2/PI489777)SNP_12005 | 2392 | G | A | 25 | 21 | -- | --       |
|            | Ca(ICC2/PI489777)SNP_12006 | 2507 | C | G | 21 | 24 | -- | --       |
|            | Ca(ICC2/PI489777)SNP_12007 | 2509 | G | C | 24 | 23 | -- | --       |
|            | Ca(ICC2/PI489777)SNP_12008 | 2566 | C | T | 17 | 12 | -- | --       |
|            | Ca(ICC2/PI489777)SNP_12009 | 2714 | G | A | 21 | 12 | -- | --       |
|            | Ca(ICC2/PI489777)SNP_12010 | 2791 | A | G | 18 | 15 | -- | --       |
|            | Ca(ICC2/PI489777)SNP_12011 | 3120 | G | C | 24 | 15 | -- | --       |
|            | Ca(ICC2/PI489777)SNP_12012 | 3168 | G | A | 26 | 15 | -- | --       |
|            | Ca(ICC2/PI489777)SNP_12013 | 4010 | A | G | 33 | 25 | -- | --       |
|            | Ca(ICC2/PI489777)SNP_12014 | 4020 | A | T | 38 | 23 | -- | --       |
|            | Ca(ICC2/PI489777)SNP_12015 | 4158 | T | A | 31 | 9  | -- | --       |
|            | Ca(ICC2/PI489777)SNP_12016 | 4192 | G | A | 32 | 11 | -- | --       |
|            | Ca(ICC2/PI489777)SNP_12017 | 4426 | A | G | 36 | 9  | -- | --       |
|            | Ca(ICC2/PI489777)SNP_12018 | 4450 | G | T | 38 | 9  | -- | --       |
|            | Ca(ICC2/PI489777)SNP_12019 | 5302 | G | A | 58 | 21 | -- | --       |
| CakTC24686 | Ca(ICC2/PI489777)SNP_12020 | 1813 | A | G | 27 | 16 | -- | --       |
|            | Ca(ICC2/PI489777)SNP_12021 | 1834 | G | A | 27 | 17 | -- | --       |
| CakTC40274 | Ca(ICC2/PI489777)SNP_12022 | 102  | G | A | 13 | 13 | -- | --       |
|            | Ca(ICC2/PI489777)SNP_12023 | 157  | C | A | 18 | 16 | -- | --       |
| CakTC25665 | Ca(ICC2/PI489777)SNP_12024 | 1183 | G | A | 7  | 3  | -- | --       |
|            | Ca(ICC2/PI489777)SNP_12025 | 1465 | C | T | 26 | 4  | -- | --       |
| CakTC40505 | Ca(ICC2/PI489777)SNP_12026 | 689  | C | A | 7  | 10 | -- | --       |
|            | Ca(ICC2/PI489777)SNP_12027 | 737  | C | A | 8  | 12 | -- | --       |
|            | Ca(ICC2/PI489777)SNP_12028 | 995  | T | C | 6  | 11 | -- | --       |
| CakTC38068 | Ca(ICC2/PI489777)SNP_12029 | 113  | C | A | 4  | 3  | -- | --       |
|            | Ca(ICC2/PI489777)SNP_12030 | 254  | G | A | 7  | 3  | -- | --       |
|            | Ca(ICC2/PI489777)SNP_12031 | 353  | T | A | 9  | 3  | -- | --       |
|            | Ca(ICC2/PI489777)SNP_12032 | 401  | G | A | 6  | 3  | -- | --       |
|            | Ca(ICC2/PI489777)SNP_12033 | 739  | C | T | 8  | 3  | -- | --       |
| CakTC41647 | Ca(ICC2/PI489777)SNP_12034 | 267  | C | T | 13 | 6  | -- | --       |
|            | Ca(ICC2/PI489777)SNP_12035 | 520  | G | A | 6  | 6  | -- | --       |
| CakTC31358 | Ca(ICC2/PI489777)SNP_12036 | 1005 | C | G | 33 | 18 | -- | --       |
| CakTC40336 | Ca(ICC2/PI489777)SNP_12037 | 405  | G | A | 5  | 5  | -- | --       |
|            | Ca(ICC2/PI489777)SNP_12038 | 722  | A | G | 8  | 5  | -- | --       |
| CakTC22889 | Ca(ICC2/PI489777)SNP_12039 | 184  | T | A | 12 | 3  | -- | --       |
|            | Ca(ICC2/PI489777)SNP_12040 | 541  | G | A | 40 | 8  | -- | --       |
| CakTC41711 | Ca(ICC2/PI489777)SNP_12041 | 1424 | T | G | 38 | 24 | -- | --       |
| CakTC39701 | Ca(ICC2/PI489777)SNP_12042 | 756  | T | G | 17 | 8  | -- | --       |
| CakTC28701 | Ca(ICC2/PI489777)SNP_12043 | 406  | A | G | 57 | 40 | -- | --       |
|            | Ca(ICC2/PI489777)SNP_12044 | 481  | A | T | 58 | 39 | -- | --       |
|            | Ca(ICC2/PI489777)SNP_12045 | 484  | G | A | 54 | 40 | -- | --       |
|            | Ca(ICC2/PI489777)SNP_12046 | 759  | C | T | 12 | 12 | -- | --       |
|            | Ca(ICC2/PI489777)SNP_12047 | 1372 | T | C | 31 | 28 | -- | --       |
| CakTC09309 | Ca(ICC2/PI489777)SNP_12048 | 2354 | A | G | 3  | 3  | -- | --       |
|            | Ca(ICC2/PI489777)SNP_12049 | 2377 | G | T | 3  | 3  | -- | --       |
| CakTC35770 | Ca(ICC2/PI489777)SNP_12050 | 3212 | A | G | 6  | 4  | -- | --       |
| CakTC29588 | Ca(ICC2/PI489777)SNP_12051 | 1173 | T | A | 6  | 3  | -- | --       |
|            | Ca(ICC2/PI489777)SNP_12052 | 1952 | C | T | 15 | 6  | -- | --       |
|            | Ca(ICC2/PI489777)SNP_12053 | 1967 | C | T | 16 | 6  | -- | --       |
|            | Ca(ICC2/PI489777)SNP_12054 | 2242 | T | G | 20 | 3  | -- | --       |
|            | Ca(ICC2/PI489777)SNP_12055 | 2371 | A | G | 16 | 5  | -- | --       |
| CakTC42508 | Ca(ICC2/PI489777)SNP_12056 | 865  | T | C | 4  | 12 | -- | --       |
|            | Ca(ICC2/PI489777)SNP_12057 | 970  | C | T | 7  | 13 | -- | --       |

|            |                            |      |   |   |     |     |        |     |
|------------|----------------------------|------|---|---|-----|-----|--------|-----|
|            | Ca(ICC2/PI489777)SNP_12058 | 979  | G | A | 7   | 13  | --     | --  |
| CakTC27414 | Ca(ICC2/PI489777)SNP_12059 | 99   | T | G | 6   | 4   | --     | --  |
|            | Ca(ICC2/PI489777)SNP_12060 | 1082 | C | T | 7   | 8   | --     | --  |
|            | Ca(ICC2/PI489777)SNP_12061 | 1755 | G | A | 7   | 5   | --     | --  |
| CakTC39068 | Ca(ICC2/PI489777)SNP_12062 | 606  | T | C | 7   | 7   | --     | --  |
|            | Ca(ICC2/PI489777)SNP_12063 | 826  | A | G | 9   | 4   | --     | --  |
|            | Ca(ICC2/PI489777)SNP_12064 | 1005 | T | A | 6   | 6   | --     | --  |
|            | Ca(ICC2/PI489777)SNP_12065 | 1010 | T | A | 6   | 6   | --     | --  |
|            | Ca(ICC2/PI489777)SNP_12066 | 1455 | T | A | 5   | 3   | --     | --  |
| CakTC38627 | Ca(ICC2/PI489777)SNP_12067 | 1047 | A | G | 34  | 35  | --     | --  |
| CakTC08411 | Ca(ICC2/PI489777)SNP_12068 | 1328 | A | G | 4   | 9   | --     | --  |
|            | Ca(ICC2/PI489777)SNP_12069 | 1376 | T | A | 4   | 8   | --     | --  |
|            | Ca(ICC2/PI489777)SNP_12070 | 1442 | A | T | 4   | 3   | --     | --  |
| CakTC28100 | Ca(ICC2/PI489777)SNP_12071 | 2271 | T | A | 5   | 4   | --     | --  |
|            | Ca(ICC2/PI489777)SNP_12072 | 2301 | C | T | 5   | 5   | --     | --  |
|            | Ca(ICC2/PI489777)SNP_12073 | 2319 | T | C | 4   | 6   | --     | --  |
| CakTC31180 | Ca(ICC2/PI489777)SNP_12074 | 558  | G | C | 4   | 7   | --     | --  |
| CakTC08632 | Ca(ICC2/PI489777)SNP_12075 | 777  | A | C | 31  | 17  | --     | --  |
|            | Ca(ICC2/PI489777)SNP_12076 | 936  | G | T | 18  | 12  | --     | --  |
| CakTC26650 | Ca(ICC2/PI489777)SNP_12077 | 161  | T | C | 28  | 11  | --     | --  |
|            | Ca(ICC2/PI489777)SNP_12078 | 1116 | G | T | 6   | 6   | --     | --  |
| CakTC40513 | Ca(ICC2/PI489777)SNP_12079 | 88   | C | T | 16  | 4   | --     | --  |
|            | Ca(ICC2/PI489777)SNP_12080 | 622  | G | T | 193 | 109 | --     | --  |
|            | Ca(ICC2/PI489777)SNP_12081 | 632  | C | G | 181 | 95  | --     | --  |
|            | Ca(ICC2/PI489777)SNP_12082 | 635  | G | A | 191 | 109 | --     | --  |
|            | Ca(ICC2/PI489777)SNP_12083 | 673  | T | C | 154 | 75  | --     | --  |
| CakTC06018 | Ca(ICC2/PI489777)SNP_12084 | 66   | A | G | 4   | 4   | --     | --  |
| CakTC25611 | Ca(ICC2/PI489777)SNP_12085 | 1228 | T | G | 8   | 4   | --     | --  |
|            | Ca(ICC2/PI489777)SNP_12086 | 1307 | G | A | 10  | 5   | --     | --  |
|            | Ca(ICC2/PI489777)SNP_12087 | 1472 | T | A | 8   | 6   | --     | --  |
|            | Ca(ICC2/PI489777)SNP_12088 | 1639 | C | A | 6   | 4   | --     | --  |
| CakTC38149 | Ca(ICC2/PI489777)SNP_12089 | 206  | C | T | 12  | 5   | --     | --  |
|            | Ca(ICC2/PI489777)SNP_12090 | 264  | G | A | 13  | 6   | --     | --  |
|            | Ca(ICC2/PI489777)SNP_12091 | 711  | A | C | 4   | 4   | --     | --  |
| CakTC22491 | Ca(ICC2/PI489777)SNP_12092 | 206  | T | C | 9   | 7   | --     | --  |
| CakTC26265 | Ca(ICC2/PI489777)SNP_12093 | 789  | A | G | 4   | 4   | Flower | bud |
|            | Ca(ICC2/PI489777)SNP_12094 | 861  | T | A | 3   | 4   | Flower | bud |
|            | Ca(ICC2/PI489777)SNP_12095 | 967  | C | G | 4   | 5   | Flower | bud |
|            | Ca(ICC2/PI489777)SNP_12096 | 4188 | A | T | 4   | 3   | Flower | bud |
|            | Ca(ICC2/PI489777)SNP_12097 | 4202 | A | G | 3   | 3   | Flower | bud |
|            | Ca(ICC2/PI489777)SNP_12098 | 4209 | C | T | 4   | 3   | Flower | bud |
| CakTC31619 | Ca(ICC2/PI489777)SNP_12099 | 702  | A | G | 15  | 25  | --     | --  |
|            | Ca(ICC2/PI489777)SNP_12100 | 876  | T | C | 28  | 28  | --     | --  |
| CakTC30287 | Ca(ICC2/PI489777)SNP_12101 | 683  | T | C | 3   | 5   | --     | --  |
| CakTC41789 | Ca(ICC2/PI489777)SNP_12102 | 166  | G | C | 7   | 3   | --     | --  |
|            | Ca(ICC2/PI489777)SNP_12103 | 292  | C | G | 8   | 3   | --     | --  |
|            | Ca(ICC2/PI489777)SNP_12104 | 501  | G | A | 4   | 3   | --     | --  |
| CakTC41537 | Ca(ICC2/PI489777)SNP_12105 | 380  | T | C | 8   | 6   | --     | --  |
| CakTC39357 | Ca(ICC2/PI489777)SNP_12106 | 951  | A | G | 6   | 4   | --     | --  |
|            | Ca(ICC2/PI489777)SNP_12107 | 997  | G | A | 5   | 7   | --     | --  |
| CakTC40039 | Ca(ICC2/PI489777)SNP_12108 | 76   | A | G | 12  | 14  | --     | --  |
|            | Ca(ICC2/PI489777)SNP_12109 | 123  | A | T | 12  | 21  | --     | --  |
|            | Ca(ICC2/PI489777)SNP_12110 | 913  | C | T | 29  | 17  | --     | --  |
| CakTC33337 | Ca(ICC2/PI489777)SNP_12111 | 160  | G | A | 11  | 7   | --     | --  |
|            | Ca(ICC2/PI489777)SNP_12112 | 2071 | T | C | 5   | 4   | --     | --  |
| CakTC41922 | Ca(ICC2/PI489777)SNP_12113 | 490  | C | G | 18  | 12  | --     | --  |
|            | Ca(ICC2/PI489777)SNP_12114 | 550  | T | C | 14  | 14  | --     | --  |
|            | Ca(ICC2/PI489777)SNP_12115 | 653  | G | T | 15  | 15  | --     | --  |
|            | Ca(ICC2/PI489777)SNP_12116 | 1068 | A | G | 17  | 8   | --     | --  |
|            | Ca(ICC2/PI489777)SNP_12117 | 1416 | C | T | 13  | 8   | --     | --  |
|            | Ca(ICC2/PI489777)SNP_12118 | 1441 | G | C | 13  | 8   | --     | --  |
| CakTC29272 | Ca(ICC2/PI489777)SNP_12119 | 2147 | T | C | 7   | 6   | Flower | bud |
|            | Ca(ICC2/PI489777)SNP_12120 | 2242 | T | C | 7   | 5   | Flower | bud |
|            | Ca(ICC2/PI489777)SNP_12121 | 2407 | T | C | 7   | 4   | Flower | bud |
| CakTC29167 | Ca(ICC2/PI489777)SNP_12122 | 263  | T | C | 7   | 13  | --     | --  |
|            | Ca(ICC2/PI489777)SNP_12123 | 403  | A | G | 5   | 17  | --     | --  |
|            | Ca(ICC2/PI489777)SNP_12124 | 683  | C | T | 6   | 8   | --     | --  |
| CakTC35195 | Ca(ICC2/PI489777)SNP_12125 | 380  | C | T | 15  | 4   | --     | --  |
|            | Ca(ICC2/PI489777)SNP_12126 | 2245 | C | T | 16  | 12  | --     | --  |
|            | Ca(ICC2/PI489777)SNP_12127 | 2681 | T | C | 34  | 4   | --     | --  |
|            | Ca(ICC2/PI489777)SNP_12128 | 3012 | T | A | 16  | 15  | --     | --  |
|            | Ca(ICC2/PI489777)SNP_12129 | 3122 | G | C | 15  | 21  | --     | --  |
| CakTC23900 | Ca(ICC2/PI489777)SNP_12130 | 377  | C | T | 11  | 5   | --     | --  |
|            | Ca(ICC2/PI489777)SNP_12131 | 633  | T | C | 12  | 12  | --     | --  |

|            |                            |      |   |   |     |    |        |      |
|------------|----------------------------|------|---|---|-----|----|--------|------|
|            | Ca(ICC2/PI489777)SNP_12132 | 1006 | G | A | 21  | 23 | --     | --   |
|            | Ca(ICC2/PI489777)SNP_12133 | 1043 | G | A | 24  | 22 | --     | --   |
|            | Ca(ICC2/PI489777)SNP_12134 | 1155 | C | A | 26  | 12 | --     | --   |
|            | Ca(ICC2/PI489777)SNP_12135 | 1163 | G | C | 25  | 12 | --     | --   |
|            | Ca(ICC2/PI489777)SNP_12136 | 1377 | A | G | 22  | 9  | --     | --   |
|            | Ca(ICC2/PI489777)SNP_12137 | 1481 | A | G | 22  | 7  | --     | --   |
|            | Ca(ICC2/PI489777)SNP_12138 | 1704 | T | C | 17  | 13 | --     | --   |
|            | Ca(ICC2/PI489777)SNP_12139 | 1839 | T | C | 9   | 8  | --     | --   |
| CakTC25292 | Ca(ICC2/PI489777)SNP_12140 | 334  | T | A | 14  | 7  | --     | --   |
|            | Ca(ICC2/PI489777)SNP_12141 | 610  | C | T | 11  | 4  | --     | --   |
| CakTC31444 | Ca(ICC2/PI489777)SNP_12142 | 272  | C | T | 7   | 7  | --     | --   |
|            | Ca(ICC2/PI489777)SNP_12143 | 395  | C | T | 8   | 7  | --     | --   |
|            | Ca(ICC2/PI489777)SNP_12144 | 398  | C | T | 5   | 8  | --     | --   |
|            | Ca(ICC2/PI489777)SNP_12145 | 515  | T | C | 5   | 9  | --     | --   |
|            | Ca(ICC2/PI489777)SNP_12146 | 539  | A | G | 4   | 4  | --     | --   |
|            | Ca(ICC2/PI489777)SNP_12147 | 548  | T | C | 4   | 6  | --     | --   |
|            | Ca(ICC2/PI489777)SNP_12148 | 549  | A | G | 4   | 6  | --     | --   |
|            | Ca(ICC2/PI489777)SNP_12149 | 578  | C | A | 5   | 6  | --     | --   |
|            | Ca(ICC2/PI489777)SNP_12150 | 1359 | G | A | 8   | 10 | --     | --   |
|            | Ca(ICC2/PI489777)SNP_12151 | 1400 | C | T | 8   | 12 | --     | --   |
|            | Ca(ICC2/PI489777)SNP_12152 | 1437 | C | A | 9   | 10 | --     | --   |
|            | Ca(ICC2/PI489777)SNP_12153 | 1490 | A | T | 7   | 12 | --     | --   |
| CakTC10305 | Ca(ICC2/PI489777)SNP_12154 | 111  | G | A | 5   | 6  | --     | --   |
| CakTC39491 | Ca(ICC2/PI489777)SNP_12155 | 54   | A | T | 5   | 3  | --     | --   |
|            | Ca(ICC2/PI489777)SNP_12156 | 77   | G | A | 8   | 4  | --     | --   |
|            | Ca(ICC2/PI489777)SNP_12157 | 115  | T | A | 10  | 4  | --     | --   |
|            | Ca(ICC2/PI489777)SNP_12158 | 780  | A | G | 58  | 45 | --     | --   |
|            | Ca(ICC2/PI489777)SNP_12159 | 1116 | A | G | 67  | 28 | --     | --   |
|            | Ca(ICC2/PI489777)SNP_12160 | 1211 | T | G | 57  | 21 | --     | --   |
| CakTC29983 | Ca(ICC2/PI489777)SNP_12161 | 674  | T | A | 6   | 8  | --     | --   |
|            | Ca(ICC2/PI489777)SNP_12162 | 1269 | G | A | 29  | 3  | --     | --   |
|            | Ca(ICC2/PI489777)SNP_12163 | 1505 | T | G | 21  | 6  | --     | --   |
| CakTC34714 | Ca(ICC2/PI489777)SNP_12164 | 2500 | C | T | 24  | 9  | --     | --   |
| CakTC33933 | Ca(ICC2/PI489777)SNP_12165 | 416  | C | T | 47  | 23 | --     | --   |
|            | Ca(ICC2/PI489777)SNP_12166 | 591  | A | G | 18  | 4  | --     | --   |
| CakTC40405 | Ca(ICC2/PI489777)SNP_12167 | 879  | A | C | 25  | 5  | --     | --   |
|            | Ca(ICC2/PI489777)SNP_12168 | 1062 | C | T | 17  | 5  | --     | --   |
|            | Ca(ICC2/PI489777)SNP_12169 | 1617 | A | G | 11  | 5  | --     | --   |
| CakTC10338 | Ca(ICC2/PI489777)SNP_12170 | 96   | C | G | 14  | 3  | --     | --   |
|            | Ca(ICC2/PI489777)SNP_12171 | 2589 | G | A | 105 | 22 | --     | --   |
| CakTC38113 | Ca(ICC2/PI489777)SNP_12172 | 284  | C | T | 7   | 5  | --     | --   |
|            | Ca(ICC2/PI489777)SNP_12173 | 419  | A | G | 6   | 3  | --     | --   |
|            | Ca(ICC2/PI489777)SNP_12174 | 604  | C | T | 6   | 8  | --     | --   |
|            | Ca(ICC2/PI489777)SNP_12175 | 715  | G | A | 8   | 7  | --     | --   |
|            | Ca(ICC2/PI489777)SNP_12176 | 796  | C | A | 8   | 14 | --     | --   |
| CakTC36106 | Ca(ICC2/PI489777)SNP_12177 | 153  | C | G | 33  | 22 | --     | --   |
|            | Ca(ICC2/PI489777)SNP_12178 | 500  | A | G | 82  | 53 | --     | --   |
|            | Ca(ICC2/PI489777)SNP_12179 | 782  | A | G | 73  | 52 | --     | --   |
|            | Ca(ICC2/PI489777)SNP_12180 | 1541 | A | T | 90  | 50 | --     | --   |
|            | Ca(ICC2/PI489777)SNP_12181 | 1610 | C | T | 78  | 53 | --     | --   |
|            | Ca(ICC2/PI489777)SNP_12182 | 1832 | A | G | 78  | 51 | --     | --   |
| CakTC10510 | Ca(ICC2/PI489777)SNP_12183 | 756  | T | C | 4   | 3  | --     | --   |
| CakTC32432 | Ca(ICC2/PI489777)SNP_12184 | 196  | C | T | 82  | 29 | --     | --   |
|            | Ca(ICC2/PI489777)SNP_12185 | 406  | T | C | 58  | 24 | --     | --   |
|            | Ca(ICC2/PI489777)SNP_12186 | 471  | C | T | 7   | 10 | --     | --   |
|            | Ca(ICC2/PI489777)SNP_12187 | 545  | G | A | 6   | 4  | --     | --   |
| CakTC32439 | Ca(ICC2/PI489777)SNP_12188 | 8    | A | G | 4   | 3  | --     | --   |
| CakTC09878 | Ca(ICC2/PI489777)SNP_12189 | 482  | A | G | 7   | 7  | --     | --   |
|            | Ca(ICC2/PI489777)SNP_12190 | 505  | T | C | 4   | 7  | --     | --   |
|            | Ca(ICC2/PI489777)SNP_12191 | 563  | G | A | 5   | 6  | --     | --   |
|            | Ca(ICC2/PI489777)SNP_12192 | 606  | C | T | 5   | 5  | --     | --   |
|            | Ca(ICC2/PI489777)SNP_12193 | 722  | T | C | 3   | 6  | --     | --   |
| CakTC43136 | Ca(ICC2/PI489777)SNP_12194 | 1050 | A | G | 22  | 7  | --     | --   |
| CakTC22463 | Ca(ICC2/PI489777)SNP_12195 | 73   | C | G | 7   | 4  | --     | --   |
|            | Ca(ICC2/PI489777)SNP_12196 | 212  | T | C | 5   | 6  | --     | --   |
|            | Ca(ICC2/PI489777)SNP_12197 | 218  | C | T | 10  | 6  | --     | --   |
|            | Ca(ICC2/PI489777)SNP_12198 | 314  | G | T | 6   | 10 | --     | --   |
|            | Ca(ICC2/PI489777)SNP_12199 | 471  | G | A | 10  | 13 | --     | --   |
|            | Ca(ICC2/PI489777)SNP_12200 | 482  | C | T | 10  | 13 | --     | --   |
|            | Ca(ICC2/PI489777)SNP_12201 | 551  | G | A | 10  | 11 | --     | --   |
| CakTC43054 | Ca(ICC2/PI489777)SNP_12202 | 733  | T | C | 7   | 12 | Mature | Leaf |
|            | Ca(ICC2/PI489777)SNP_12203 | 742  | C | T | 10  | 12 | Mature | Leaf |
|            | Ca(ICC2/PI489777)SNP_12204 | 817  | C | T | 11  | 11 | Mature | Leaf |
|            | Ca(ICC2/PI489777)SNP_12205 | 829  | G | A | 12  | 10 | Mature | Leaf |

|            |                             |      |   |   |    |    |           |     |
|------------|-----------------------------|------|---|---|----|----|-----------|-----|
| CakTC30633 | Ca(ICCV2/PI489777)SNP_12206 | 1616 | C | T | 3  | 6  | --        | --  |
| CakTC37517 | Ca(ICCV2/PI489777)SNP_12207 | 481  | G | C | 12 | 6  | --        | --  |
|            | Ca(ICCV2/PI489777)SNP_12208 | 1225 | G | T | 7  | 4  | --        | --  |
| CakTC36519 | Ca(ICCV2/PI489777)SNP_12209 | 1015 | G | A | 3  | 3  | Young_pod | --  |
|            | Ca(ICCV2/PI489777)SNP_12210 | 2517 | T | C | 9  | 5  | Young_pod | --  |
| CakTC34959 | Ca(ICCV2/PI489777)SNP_12211 | 551  | T | C | 22 | 14 | --        | --  |
|            | Ca(ICCV2/PI489777)SNP_12212 | 1682 | T | C | 19 | 18 | --        | --  |
|            | Ca(ICCV2/PI489777)SNP_12213 | 1850 | C | T | 19 | 27 | --        | --  |
|            | Ca(ICCV2/PI489777)SNP_12214 | 2249 | C | T | 32 | 18 | --        | --  |
|            | Ca(ICCV2/PI489777)SNP_12215 | 3071 | G | A | 21 | 27 | --        | --  |
|            | Ca(ICCV2/PI489777)SNP_12216 | 3191 | T | G | 22 | 37 | --        | --  |
|            | Ca(ICCV2/PI489777)SNP_12217 | 3329 | C | T | 25 | 30 | --        | --  |
|            | Ca(ICCV2/PI489777)SNP_12218 | 3446 | A | G | 14 | 7  | --        | --  |
| CakTC33235 | Ca(ICCV2/PI489777)SNP_12219 | 1430 | C | A | 3  | 5  | --        | --  |
|            | Ca(ICCV2/PI489777)SNP_12220 | 1659 | G | A | 4  | 3  | --        | --  |
|            | Ca(ICCV2/PI489777)SNP_12221 | 1660 | A | T | 4  | 3  | --        | --  |
|            | Ca(ICCV2/PI489777)SNP_12222 | 1799 | A | C | 5  | 6  | --        | --  |
| CakTC30209 | Ca(ICCV2/PI489777)SNP_12223 | 496  | A | G | 7  | 3  | --        | --  |
|            | Ca(ICCV2/PI489777)SNP_12224 | 696  | T | C | 4  | 3  | --        | --  |
|            | Ca(ICCV2/PI489777)SNP_12225 | 820  | C | T | 3  | 3  | --        | --  |
|            | Ca(ICCV2/PI489777)SNP_12226 | 1372 | G | A | 4  | 4  | --        | --  |
|            | Ca(ICCV2/PI489777)SNP_12227 | 1385 | C | T | 5  | 4  | --        | --  |
|            | Ca(ICCV2/PI489777)SNP_12228 | 1429 | T | C | 4  | 4  | --        | --  |
|            | Ca(ICCV2/PI489777)SNP_12229 | 1688 | T | C | 4  | 5  | --        | --  |
|            | Ca(ICCV2/PI489777)SNP_12230 | 1916 | G | T | 6  | 6  | --        | --  |
|            | Ca(ICCV2/PI489777)SNP_12231 | 2007 | T | C | 7  | 5  | --        | --  |
|            | Ca(ICCV2/PI489777)SNP_12232 | 2113 | G | A | 6  | 3  | --        | --  |
| CakTC26063 | Ca(ICCV2/PI489777)SNP_12233 | 835  | T | C | 15 | 9  | --        | --  |
| CakTC39884 | Ca(ICCV2/PI489777)SNP_12234 | 1221 | G | A | 7  | 4  | --        | --  |
| CakTC22722 | Ca(ICCV2/PI489777)SNP_12235 | 1534 | A | G | 8  | 22 | --        | --  |
| CakTC32481 | Ca(ICCV2/PI489777)SNP_12236 | 251  | T | G | 48 | 26 | --        | --  |
| CakTC27692 | Ca(ICCV2/PI489777)SNP_12237 | 166  | T | C | 5  | 6  | --        | --  |
|            | Ca(ICCV2/PI489777)SNP_12238 | 188  | G | A | 6  | 6  | --        | --  |
|            | Ca(ICCV2/PI489777)SNP_12239 | 325  | T | C | 16 | 4  | --        | --  |
|            | Ca(ICCV2/PI489777)SNP_12240 | 406  | C | T | 8  | 6  | --        | --  |
|            | Ca(ICCV2/PI489777)SNP_12241 | 439  | C | T | 13 | 6  | --        | --  |
|            | Ca(ICCV2/PI489777)SNP_12242 | 456  | T | C | 13 | 5  | --        | --  |
|            | Ca(ICCV2/PI489777)SNP_12243 | 457  | A | G | 13 | 5  | --        | --  |
|            | Ca(ICCV2/PI489777)SNP_12244 | 475  | A | G | 12 | 5  | --        | --  |
|            | Ca(ICCV2/PI489777)SNP_12245 | 502  | G | A | 13 | 4  | --        | --  |
|            | Ca(ICCV2/PI489777)SNP_12246 | 653  | G | A | 8  | 4  | --        | --  |
| CakTC06744 | Ca(ICCV2/PI489777)SNP_12247 | 233  | A | T | 3  | 5  | --        | --  |
| CakTC29581 | Ca(ICCV2/PI489777)SNP_12248 | 2016 | A | G | 4  | 3  | --        | --  |
| CakTC27188 | Ca(ICCV2/PI489777)SNP_12249 | 2702 | G | T | 3  | 3  | --        | --  |
| CakTC30955 | Ca(ICCV2/PI489777)SNP_12250 | 1372 | T | C | 7  | 4  | --        | --  |
|            | Ca(ICCV2/PI489777)SNP_12251 | 1859 | A | G | 6  | 3  | --        | --  |
|            | Ca(ICCV2/PI489777)SNP_12252 | 1942 | G | A | 6  | 4  | --        | --  |
| CakTC33891 | Ca(ICCV2/PI489777)SNP_12253 | 1104 | G | A | 32 | 35 | --        | --  |
|            | Ca(ICCV2/PI489777)SNP_12254 | 1755 | C | A | 21 | 32 | --        | --  |
|            | Ca(ICCV2/PI489777)SNP_12255 | 1788 | G | A | 24 | 29 | --        | --  |
|            | Ca(ICCV2/PI489777)SNP_12256 | 1806 | G | A | 24 | 26 | --        | --  |
|            | Ca(ICCV2/PI489777)SNP_12257 | 1827 | A | C | 17 | 26 | --        | --  |
|            | Ca(ICCV2/PI489777)SNP_12258 | 1923 | T | C | 17 | 19 | --        | --  |
| CakTC38838 | Ca(ICCV2/PI489777)SNP_12259 | 438  | C | T | 10 | 10 | --        | --  |
|            | Ca(ICCV2/PI489777)SNP_12260 | 474  | C | T | 10 | 7  | --        | --  |
|            | Ca(ICCV2/PI489777)SNP_12261 | 501  | C | T | 11 | 8  | --        | --  |
|            | Ca(ICCV2/PI489777)SNP_12262 | 610  | T | C | 4  | 6  | --        | --  |
|            | Ca(ICCV2/PI489777)SNP_12263 | 645  | C | T | 7  | 8  | --        | --  |
|            | Ca(ICCV2/PI489777)SNP_12264 | 744  | A | G | 3  | 6  | --        | --  |
|            | Ca(ICCV2/PI489777)SNP_12265 | 768  | T | C | 4  | 5  | --        | --  |
|            | Ca(ICCV2/PI489777)SNP_12266 | 789  | T | C | 3  | 6  | --        | --  |
| CakTC23707 | Ca(ICCV2/PI489777)SNP_12267 | 472  | G | A | 16 | 7  | --        | --  |
|            | Ca(ICCV2/PI489777)SNP_12268 | 1330 | G | A | 6  | 5  | --        | --  |
| CakTC40281 | Ca(ICCV2/PI489777)SNP_12269 | 297  | T | C | 6  | 8  | --        | --  |
| CakTC27330 | Ca(ICCV2/PI489777)SNP_12270 | 69   | T | C | 11 | 6  | --        | --  |
|            | Ca(ICCV2/PI489777)SNP_12271 | 1482 | A | G | 27 | 39 | --        | --  |
|            | Ca(ICCV2/PI489777)SNP_12272 | 1554 | A | G | 23 | 9  | --        | --  |
|            | Ca(ICCV2/PI489777)SNP_12273 | 1557 | C | T | 23 | 9  | --        | --  |
| CakTC25263 | Ca(ICCV2/PI489777)SNP_12274 | 273  | A | G | 18 | 30 | --        | --  |
| CakTC27936 | Ca(ICCV2/PI489777)SNP_12275 | 584  | A | G | 26 | 19 | --        | TPR |
|            | Ca(ICCV2/PI489777)SNP_12276 | 746  | C | A | 22 | 17 | --        | TPR |
|            | Ca(ICCV2/PI489777)SNP_12277 | 962  | T | C | 32 | 10 | --        | TPR |
|            | Ca(ICCV2/PI489777)SNP_12278 | 1265 | T | G | 23 | 11 | --        | TPR |
|            | Ca(ICCV2/PI489777)SNP_12279 | 1398 | G | A | 17 | 10 | --        | TPR |

|            |                             |      |   |   |     |    |    |     |
|------------|-----------------------------|------|---|---|-----|----|----|-----|
| CakTC26881 | Ca(ICCV2/PI489777)SNP_12280 | 114  | T | C | 11  | 3  | -- | --  |
|            | Ca(ICCV2/PI489777)SNP_12281 | 358  | T | C | 9   | 3  | -- | --  |
|            | Ca(ICCV2/PI489777)SNP_12282 | 399  | T | C | 8   | 3  | -- | --  |
| CakTC42873 | Ca(ICCV2/PI489777)SNP_12283 | 516  | G | C | 18  | 8  | -- | --  |
|            | Ca(ICCV2/PI489777)SNP_12284 | 594  | G | A | 11  | 7  | -- | --  |
| CakTC23883 | Ca(ICCV2/PI489777)SNP_12285 | 449  | G | A | 53  | 12 | -- | --  |
|            | Ca(ICCV2/PI489777)SNP_12286 | 1389 | A | G | 78  | 19 | -- | --  |
|            | Ca(ICCV2/PI489777)SNP_12287 | 2307 | G | T | 95  | 29 | -- | --  |
|            | Ca(ICCV2/PI489777)SNP_12288 | 3898 | G | A | 94  | 29 | -- | --  |
|            | Ca(ICCV2/PI489777)SNP_12289 | 4287 | C | T | 91  | 27 | -- | --  |
|            | Ca(ICCV2/PI489777)SNP_12290 | 4309 | G | T | 100 | 27 | -- | --  |
| CakTC40306 | Ca(ICCV2/PI489777)SNP_12291 | 39   | G | C | 3   | 3  | -- | --  |
| CakTC39879 | Ca(ICCV2/PI489777)SNP_12292 | 745  | C | T | 34  | 8  | -- | FHA |
| CakTC27162 | Ca(ICCV2/PI489777)SNP_12293 | 180  | T | C | 6   | 3  | -- | --  |
|            | Ca(ICCV2/PI489777)SNP_12294 | 373  | A | C | 6   | 5  | -- | --  |
|            | Ca(ICCV2/PI489777)SNP_12295 | 882  | A | G | 6   | 5  | -- | --  |
|            | Ca(ICCV2/PI489777)SNP_12296 | 1187 | T | G | 11  | 9  | -- | --  |
| CakTC42115 | Ca(ICCV2/PI489777)SNP_12297 | 495  | T | G | 6   | 15 | -- | --  |
|            | Ca(ICCV2/PI489777)SNP_12298 | 642  | G | A | 10  | 17 | -- | --  |
|            | Ca(ICCV2/PI489777)SNP_12299 | 796  | G | C | 9   | 14 | -- | --  |
|            | Ca(ICCV2/PI489777)SNP_12300 | 958  | G | A | 3   | 5  | -- | --  |
| CakTC26094 | Ca(ICCV2/PI489777)SNP_12301 | 237  | G | T | 11  | 12 | -- | --  |
|            | Ca(ICCV2/PI489777)SNP_12302 | 955  | C | T | 22  | 17 | -- | --  |
|            | Ca(ICCV2/PI489777)SNP_12303 | 1385 | T | C | 45  | 22 | -- | --  |
|            | Ca(ICCV2/PI489777)SNP_12304 | 2188 | T | C | 36  | 15 | -- | --  |
|            | Ca(ICCV2/PI489777)SNP_12305 | 2558 | A | G | 49  | 18 | -- | --  |
|            | Ca(ICCV2/PI489777)SNP_12306 | 2870 | G | A | 56  | 27 | -- | --  |
|            | Ca(ICCV2/PI489777)SNP_12307 | 3412 | G | A | 25  | 17 | -- | --  |
| CakTC22688 | Ca(ICCV2/PI489777)SNP_12308 | 2880 | G | A | 4   | 5  | -- | --  |
| CakTC11051 | Ca(ICCV2/PI489777)SNP_12309 | 383  | A | T | 9   | 4  | -- | --  |
|            | Ca(ICCV2/PI489777)SNP_12310 | 1454 | T | C | 35  | 20 | -- | --  |
|            | Ca(ICCV2/PI489777)SNP_12311 | 1781 | C | A | 21  | 16 | -- | --  |
|            | Ca(ICCV2/PI489777)SNP_12312 | 1888 | A | G | 23  | 14 | -- | --  |
|            | Ca(ICCV2/PI489777)SNP_12313 | 1897 | A | G | 19  | 10 | -- | --  |
|            | Ca(ICCV2/PI489777)SNP_12314 | 1927 | G | A | 12  | 11 | -- | --  |
|            | Ca(ICCV2/PI489777)SNP_12315 | 2032 | A | T | 16  | 10 | -- | --  |
| CakTC32119 | Ca(ICCV2/PI489777)SNP_12316 | 93   | A | G | 3   | 4  | -- | --  |
|            | Ca(ICCV2/PI489777)SNP_12317 | 103  | G | C | 3   | 4  | -- | --  |
|            | Ca(ICCV2/PI489777)SNP_12318 | 163  | G | T | 6   | 5  | -- | --  |
|            | Ca(ICCV2/PI489777)SNP_12319 | 259  | T | G | 9   | 7  | -- | --  |
|            | Ca(ICCV2/PI489777)SNP_12320 | 360  | G | A | 9   | 7  | -- | --  |
|            | Ca(ICCV2/PI489777)SNP_12321 | 744  | A | G | 6   | 3  | -- | --  |
|            | Ca(ICCV2/PI489777)SNP_12322 | 928  | C | T | 4   | 6  | -- | --  |
| CakTC23344 | Ca(ICCV2/PI489777)SNP_12323 | 1475 | T | C | 21  | 11 | -- | --  |
|            | Ca(ICCV2/PI489777)SNP_12324 | 1482 | A | G | 22  | 11 | -- | --  |
|            | Ca(ICCV2/PI489777)SNP_12325 | 1583 | C | A | 20  | 8  | -- | --  |
| CakTC37348 | Ca(ICCV2/PI489777)SNP_12326 | 125  | C | G | 10  | 3  | -- | --  |
|            | Ca(ICCV2/PI489777)SNP_12327 | 127  | C | T | 10  | 3  | -- | --  |
|            | Ca(ICCV2/PI489777)SNP_12328 | 161  | A | C | 11  | 12 | -- | --  |
|            | Ca(ICCV2/PI489777)SNP_12329 | 204  | C | T | 11  | 11 | -- | --  |
|            | Ca(ICCV2/PI489777)SNP_12330 | 243  | T | G | 10  | 10 | -- | --  |
| CakTC09925 | Ca(ICCV2/PI489777)SNP_12331 | 414  | C | T | 3   | 4  | -- | --  |
|            | Ca(ICCV2/PI489777)SNP_12332 | 2293 | G | T | 4   | 4  | -- | --  |
|            | Ca(ICCV2/PI489777)SNP_12333 | 2770 | C | G | 5   | 3  | -- | --  |
| CakTC22731 | Ca(ICCV2/PI489777)SNP_12334 | 1416 | T | C | 5   | 5  | -- | --  |
| CakTC37392 | Ca(ICCV2/PI489777)SNP_12335 | 714  | C | T | 53  | 13 | -- | --  |
|            | Ca(ICCV2/PI489777)SNP_12336 | 837  | A | G | 56  | 24 | -- | --  |
|            | Ca(ICCV2/PI489777)SNP_12337 | 936  | A | G | 65  | 25 | -- | --  |
| CakTC11033 | Ca(ICCV2/PI489777)SNP_12338 | 601  | A | T | 7   | 3  | -- | --  |
| CakTC23003 | Ca(ICCV2/PI489777)SNP_12339 | 404  | T | G | 11  | 3  | -- | --  |
|            | Ca(ICCV2/PI489777)SNP_12340 | 719  | T | C | 10  | 7  | -- | --  |
|            | Ca(ICCV2/PI489777)SNP_12341 | 1079 | A | G | 22  | 7  | -- | --  |
|            | Ca(ICCV2/PI489777)SNP_12342 | 1316 | A | G | 19  | 11 | -- | --  |
|            | Ca(ICCV2/PI489777)SNP_12343 | 1607 | T | C | 15  | 8  | -- | --  |
|            | Ca(ICCV2/PI489777)SNP_12344 | 1888 | G | A | 35  | 17 | -- | --  |
|            | Ca(ICCV2/PI489777)SNP_12345 | 2005 | C | T | 37  | 18 | -- | --  |
|            | Ca(ICCV2/PI489777)SNP_12346 | 2040 | T | G | 34  | 19 | -- | --  |
|            | Ca(ICCV2/PI489777)SNP_12347 | 2125 | T | G | 28  | 17 | -- | --  |
|            | Ca(ICCV2/PI489777)SNP_12348 | 2143 | A | G | 25  | 16 | -- | --  |
| CakTC22720 | Ca(ICCV2/PI489777)SNP_12349 | 872  | A | G | 12  | 11 | -- | --  |
|            | Ca(ICCV2/PI489777)SNP_12350 | 1629 | G | A | 18  | 18 | -- | --  |
|            | Ca(ICCV2/PI489777)SNP_12351 | 3098 | T | C | 3   | 4  | -- | --  |
| CakTC38696 | Ca(ICCV2/PI489777)SNP_12352 | 412  | G | T | 22  | 10 | -- | --  |
|            | Ca(ICCV2/PI489777)SNP_12353 | 1004 | T | G | 16  | 4  | -- | --  |

|            |                             |      |   |   |    |    |           |        |
|------------|-----------------------------|------|---|---|----|----|-----------|--------|
| CakTC13053 | Ca(ICCV2/PI489777)SNP_12354 | 175  | G | A | 15 | 3  | --        | --     |
| CakTC33772 | Ca(ICCV2/PI489777)SNP_12355 | 402  | C | A | 57 | 15 | --        | --     |
|            | Ca(ICCV2/PI489777)SNP_12356 | 712  | G | T | 45 | 14 | --        | --     |
| CakTC27183 | Ca(ICCV2/PI489777)SNP_12357 | 44   | A | T | 4  | 3  | Young_pod | --     |
| CakTC31668 | Ca(ICCV2/PI489777)SNP_12358 | 431  | C | G | 4  | 6  | --        | --     |
|            | Ca(ICCV2/PI489777)SNP_12359 | 920  | C | T | 4  | 3  | --        | --     |
|            | Ca(ICCV2/PI489777)SNP_12360 | 943  | A | C | 5  | 3  | --        | --     |
|            | Ca(ICCV2/PI489777)SNP_12361 | 1371 | T | G | 11 | 3  | --        | --     |
|            | Ca(ICCV2/PI489777)SNP_12362 | 1707 | C | T | 12 | 6  | --        | --     |
| CakTC31441 | Ca(ICCV2/PI489777)SNP_12363 | 320  | A | G | 3  | 5  | --        | --     |
|            | Ca(ICCV2/PI489777)SNP_12364 | 605  | A | T | 3  | 6  | --        | --     |
| CakTC30511 | Ca(ICCV2/PI489777)SNP_12365 | 638  | C | T | 17 | 4  | --        | --     |
|            | Ca(ICCV2/PI489777)SNP_12366 | 674  | G | A | 21 | 5  | --        | --     |
|            | Ca(ICCV2/PI489777)SNP_12367 | 1013 | C | G | 16 | 3  | --        | --     |
|            | Ca(ICCV2/PI489777)SNP_12368 | 1042 | G | A | 19 | 4  | --        | --     |
| CakTC38287 | Ca(ICCV2/PI489777)SNP_12369 | 1070 | A | T | 32 | 20 | --        | --     |
|            | Ca(ICCV2/PI489777)SNP_12370 | 1169 | C | T | 20 | 12 | --        | --     |
| CakTC27732 | Ca(ICCV2/PI489777)SNP_12371 | 752  | A | G | 40 | 41 | Shoot     | --     |
|            | Ca(ICCV2/PI489777)SNP_12372 | 839  | C | T | 44 | 40 | Shoot     | --     |
| CakTC30071 | Ca(ICCV2/PI489777)SNP_12373 | 1557 | A | C | 8  | 3  | --        | --     |
| CakTC28578 | Ca(ICCV2/PI489777)SNP_12374 | 426  | G | A | 3  | 7  | --        | MYB    |
| CakTC09526 | Ca(ICCV2/PI489777)SNP_12375 | 549  | G | A | 10 | 5  | Shoot     | --     |
|            | Ca(ICCV2/PI489777)SNP_12376 | 1382 | A | T | 15 | 7  | Shoot     | --     |
|            | Ca(ICCV2/PI489777)SNP_12377 | 1911 | A | C | 10 | 4  | Shoot     | --     |
|            | Ca(ICCV2/PI489777)SNP_12378 | 1953 | T | C | 12 | 4  | Shoot     | --     |
| CakTC18239 | Ca(ICCV2/PI489777)SNP_12379 | 818  | G | A | 4  | 4  | --        | --     |
|            | Ca(ICCV2/PI489777)SNP_12380 | 820  | A | G | 4  | 4  | --        | --     |
| CakTC27003 | Ca(ICCV2/PI489777)SNP_12381 | 1479 | G | A | 16 | 12 | --        | --     |
| CakTC11072 | Ca(ICCV2/PI489777)SNP_12382 | 906  | T | C | 8  | 3  | --        | E2F-DP |
| CakTC39606 | Ca(ICCV2/PI489777)SNP_12383 | 181  | A | C | 22 | 6  | --        | --     |
|            | Ca(ICCV2/PI489777)SNP_12384 | 708  | C | T | 15 | 7  | --        | --     |
| CakTC41112 | Ca(ICCV2/PI489777)SNP_12385 | 368  | G | A | 6  | 4  | --        | --     |
|            | Ca(ICCV2/PI489777)SNP_12386 | 625  | A | C | 10 | 5  | --        | --     |
|            | Ca(ICCV2/PI489777)SNP_12387 | 647  | T | C | 10 | 6  | --        | --     |
|            | Ca(ICCV2/PI489777)SNP_12388 | 651  | A | G | 9  | 6  | --        | --     |
|            | Ca(ICCV2/PI489777)SNP_12389 | 1040 | G | A | 4  | 5  | --        | --     |
|            | Ca(ICCV2/PI489777)SNP_12390 | 1106 | T | C | 6  | 9  | --        | --     |
|            | Ca(ICCV2/PI489777)SNP_12391 | 1121 | A | T | 5  | 7  | --        | --     |
|            | Ca(ICCV2/PI489777)SNP_12392 | 1482 | T | C | 13 | 5  | --        | --     |
| CakTC36933 | Ca(ICCV2/PI489777)SNP_12393 | 360  | T | C | 49 | 33 | --        | --     |
|            | Ca(ICCV2/PI489777)SNP_12394 | 597  | A | G | 36 | 22 | --        | --     |
|            | Ca(ICCV2/PI489777)SNP_12395 | 822  | A | G | 31 | 23 | --        | --     |
|            | Ca(ICCV2/PI489777)SNP_12396 | 1413 | A | T | 43 | 27 | --        | --     |
|            | Ca(ICCV2/PI489777)SNP_12397 | 1557 | T | G | 44 | 23 | --        | --     |
|            | Ca(ICCV2/PI489777)SNP_12398 | 2448 | G | C | 7  | 5  | --        | --     |
|            | Ca(ICCV2/PI489777)SNP_12399 | 2451 | G | C | 7  | 5  | --        | --     |
| CakTC40058 | Ca(ICCV2/PI489777)SNP_12400 | 179  | G | C | 7  | 4  | --        | --     |
|            | Ca(ICCV2/PI489777)SNP_12401 | 181  | T | A | 6  | 4  | --        | --     |
|            | Ca(ICCV2/PI489777)SNP_12402 | 439  | C | T | 44 | 12 | --        | --     |
| CakTC26917 | Ca(ICCV2/PI489777)SNP_12403 | 588  | C | T | 5  | 11 | --        | --     |
| CakTC38680 | Ca(ICCV2/PI489777)SNP_12404 | 754  | T | C | 10 | 6  | --        | --     |
|            | Ca(ICCV2/PI489777)SNP_12405 | 762  | G | A | 10 | 5  | --        | --     |
|            | Ca(ICCV2/PI489777)SNP_12406 | 846  | T | G | 11 | 5  | --        | --     |
| CakTC35900 | Ca(ICCV2/PI489777)SNP_12407 | 291  | G | C | 4  | 13 | --        | --     |
| CakTC37658 | Ca(ICCV2/PI489777)SNP_12408 | 1222 | G | A | 3  | 8  | --        | --     |
| CakTC28082 | Ca(ICCV2/PI489777)SNP_12409 | 981  | T | C | 6  | 4  | --        | --     |
|            | Ca(ICCV2/PI489777)SNP_12410 | 1179 | C | T | 8  | 4  | --        | --     |
|            | Ca(ICCV2/PI489777)SNP_12411 | 1238 | C | T | 6  | 5  | --        | --     |
| CakTC26931 | Ca(ICCV2/PI489777)SNP_12412 | 127  | G | C | 4  | 4  | --        | --     |
|            | Ca(ICCV2/PI489777)SNP_12413 | 521  | G | A | 6  | 4  | --        | --     |
|            | Ca(ICCV2/PI489777)SNP_12414 | 581  | A | G | 4  | 3  | --        | --     |
|            | Ca(ICCV2/PI489777)SNP_12415 | 1871 | T | A | 6  | 3  | --        | --     |
| CakTC40023 | Ca(ICCV2/PI489777)SNP_12416 | 136  | A | G | 23 | 15 | --        | --     |
|            | Ca(ICCV2/PI489777)SNP_12417 | 147  | G | A | 20 | 17 | --        | --     |
|            | Ca(ICCV2/PI489777)SNP_12418 | 179  | A | G | 23 | 17 | --        | --     |
| CakTC35436 | Ca(ICCV2/PI489777)SNP_12419 | 775  | C | T | 20 | 13 | --        | --     |
|            | Ca(ICCV2/PI489777)SNP_12420 | 1217 | G | A | 20 | 17 | --        | --     |
|            | Ca(ICCV2/PI489777)SNP_12421 | 1736 | G | A | 11 | 8  | --        | --     |
|            | Ca(ICCV2/PI489777)SNP_12422 | 1808 | G | T | 19 | 9  | --        | --     |
|            | Ca(ICCV2/PI489777)SNP_12423 | 1847 | C | T | 20 | 9  | --        | --     |
|            | Ca(ICCV2/PI489777)SNP_12424 | 1976 | G | A | 17 | 8  | --        | --     |
|            | Ca(ICCV2/PI489777)SNP_12425 | 2030 | G | A | 23 | 14 | --        | --     |
|            | Ca(ICCV2/PI489777)SNP_12426 | 2179 | A | C | 21 | 14 | --        | --     |
|            | Ca(ICCV2/PI489777)SNP_12427 | 2266 | T | A | 18 | 13 | --        | --     |



|            |                            |      |   |   |    |    |        |         |
|------------|----------------------------|------|---|---|----|----|--------|---------|
|            | Ca(ICC2/PI489777)SNP_12428 | 2570 | T | C | 14 | 6  | --     | --      |
|            | Ca(ICC2/PI489777)SNP_12429 | 2798 | T | C | 12 | 13 | --     | --      |
|            | Ca(ICC2/PI489777)SNP_12430 | 3481 | A | C | 16 | 14 | --     | --      |
|            | Ca(ICC2/PI489777)SNP_12431 | 3707 | C | T | 31 | 9  | --     | --      |
|            | Ca(ICC2/PI489777)SNP_12432 | 3756 | T | C | 31 | 11 | --     | --      |
| CakTC33902 | Ca(ICC2/PI489777)SNP_12433 | 29   | A | C | 7  | 9  | --     | --      |
| CakTC26753 | Ca(ICC2/PI489777)SNP_12434 | 780  | C | T | 31 | 11 | --     | --      |
|            | Ca(ICC2/PI489777)SNP_12435 | 906  | C | T | 44 | 14 | --     | --      |
|            | Ca(ICC2/PI489777)SNP_12436 | 921  | C | T | 39 | 13 | --     | --      |
|            | Ca(ICC2/PI489777)SNP_12437 | 1056 | A | G | 39 | 21 | --     | --      |
|            | Ca(ICC2/PI489777)SNP_12438 | 1197 | G | A | 32 | 20 | --     | --      |
|            | Ca(ICC2/PI489777)SNP_12439 | 1410 | C | G | 21 | 12 | --     | --      |
| CakTC39688 | Ca(ICC2/PI489777)SNP_12440 | 130  | G | A | 20 | 10 | --     | --      |
|            | Ca(ICC2/PI489777)SNP_12441 | 379  | T | C | 25 | 14 | --     | --      |
|            | Ca(ICC2/PI489777)SNP_12442 | 1205 | T | C | 9  | 4  | --     | --      |
|            | Ca(ICC2/PI489777)SNP_12443 | 1270 | C | T | 4  | 3  | --     | --      |
| CakTC36059 | Ca(ICC2/PI489777)SNP_12444 | 2241 | T | C | 4  | 4  | --     | --      |
|            | Ca(ICC2/PI489777)SNP_12445 | 3081 | G | A | 6  | 6  | --     | --      |
|            | Ca(ICC2/PI489777)SNP_12446 | 3291 | T | G | 5  | 5  | --     | --      |
| CakTC30752 | Ca(ICC2/PI489777)SNP_12447 | 894  | T | C | 4  | 4  | --     | --      |
| CakTC25453 | Ca(ICC2/PI489777)SNP_12448 | 62   | T | C | 3  | 3  | --     | --      |
|            | Ca(ICC2/PI489777)SNP_12449 | 77   | T | G | 3  | 3  | --     | --      |
|            | Ca(ICC2/PI489777)SNP_12450 | 191  | C | T | 3  | 5  | --     | --      |
| CakTC27907 | Ca(ICC2/PI489777)SNP_12451 | 124  | C | T | 4  | 3  | --     | --      |
|            | Ca(ICC2/PI489777)SNP_12452 | 544  | C | T | 19 | 20 | --     | --      |
|            | Ca(ICC2/PI489777)SNP_12453 | 562  | T | C | 23 | 24 | --     | --      |
|            | Ca(ICC2/PI489777)SNP_12454 | 1186 | T | A | 13 | 18 | --     | --      |
|            | Ca(ICC2/PI489777)SNP_12455 | 1804 | G | A | 8  | 9  | --     | --      |
| CakTC39039 | Ca(ICC2/PI489777)SNP_12456 | 101  | C | T | 12 | 5  | --     | --      |
|            | Ca(ICC2/PI489777)SNP_12457 | 256  | T | A | 22 | 12 | --     | --      |
|            | Ca(ICC2/PI489777)SNP_12458 | 337  | C | T | 30 | 18 | --     | --      |
|            | Ca(ICC2/PI489777)SNP_12459 | 370  | T | C | 33 | 21 | --     | --      |
|            | Ca(ICC2/PI489777)SNP_12460 | 847  | A | G | 22 | 11 | --     | --      |
|            | Ca(ICC2/PI489777)SNP_12461 | 913  | G | A | 24 | 12 | --     | --      |
|            | Ca(ICC2/PI489777)SNP_12462 | 970  | C | A | 28 | 22 | --     | --      |
|            | Ca(ICC2/PI489777)SNP_12463 | 1040 | C | T | 30 | 21 | --     | --      |
|            | Ca(ICC2/PI489777)SNP_12464 | 1205 | G | C | 17 | 7  | --     | --      |
|            | Ca(ICC2/PI489777)SNP_12465 | 1330 | A | G | 11 | 7  | --     | --      |
| CakTC27886 | Ca(ICC2/PI489777)SNP_12466 | 637  | G | C | 33 | 13 | --     | --      |
|            | Ca(ICC2/PI489777)SNP_12467 | 1160 | T | C | 39 | 18 | --     | --      |
| CakTC11398 | Ca(ICC2/PI489777)SNP_12468 | 192  | C | G | 8  | 7  | --     | --      |
|            | Ca(ICC2/PI489777)SNP_12469 | 517  | G | A | 4  | 4  | --     | --      |
|            | Ca(ICC2/PI489777)SNP_12470 | 1134 | G | A | 6  | 4  | --     | --      |
|            | Ca(ICC2/PI489777)SNP_12471 | 1228 | C | A | 3  | 3  | --     | --      |
| CakTC41831 | Ca(ICC2/PI489777)SNP_12472 | 193  | G | C | 3  | 5  | Flower | bud     |
| CakTC39033 | Ca(ICC2/PI489777)SNP_12473 | 547  | T | C | 5  | 4  | --     | --      |
|            | Ca(ICC2/PI489777)SNP_12474 | 1022 | T | C | 7  | 3  | --     | --      |
|            | Ca(ICC2/PI489777)SNP_12475 | 1424 | A | G | 4  | 3  | --     | --      |
|            | Ca(ICC2/PI489777)SNP_12476 | 1443 | T | C | 4  | 3  | --     | --      |
| CakTC09533 | Ca(ICC2/PI489777)SNP_12477 | 2587 | G | T | 5  | 11 | --     | --      |
| CakTC39824 | Ca(ICC2/PI489777)SNP_12478 | 1392 | G | A | 3  | 3  | --     | --      |
| CakTC27557 | Ca(ICC2/PI489777)SNP_12479 | 208  | T | C | 5  | 14 | --     | --      |
| CakTC02273 | Ca(ICC2/PI489777)SNP_12480 | 639  | T | C | 3  | 5  | --     | --      |
| CakTC10764 | Ca(ICC2/PI489777)SNP_12481 | 240  | T | G | 4  | 5  | --     | --      |
| CakTC29493 | Ca(ICC2/PI489777)SNP_12482 | 399  | G | T | 51 | 84 | --     | --      |
| CakTC41300 | Ca(ICC2/PI489777)SNP_12483 | 1656 | A | C | 12 | 12 | --     | --      |
|            | Ca(ICC2/PI489777)SNP_12484 | 1788 | G | A | 17 | 16 | --     | --      |
|            | Ca(ICC2/PI489777)SNP_12485 | 2305 | G | C | 19 | 10 | --     | --      |
| CakTC40331 | Ca(ICC2/PI489777)SNP_12486 | 1621 | T | C | 6  | 5  | --     | --      |
|            | Ca(ICC2/PI489777)SNP_12487 | 1951 | T | C | 8  | 3  | --     | --      |
| CakTC41772 | Ca(ICC2/PI489777)SNP_12488 | 126  | T | A | 7  | 4  | --     | --      |
| CakTC25832 | Ca(ICC2/PI489777)SNP_12489 | 283  | A | G | 9  | 6  | --     | --      |
|            | Ca(ICC2/PI489777)SNP_12490 | 348  | A | G | 10 | 6  | --     | --      |
|            | Ca(ICC2/PI489777)SNP_12491 | 708  | A | C | 20 | 4  | --     | --      |
|            | Ca(ICC2/PI489777)SNP_12492 | 718  | T | G | 14 | 4  | --     | --      |
| CakTC30457 | Ca(ICC2/PI489777)SNP_12493 | 1102 | T | C | 6  | 3  | --     | --      |
| CakTC23860 | Ca(ICC2/PI489777)SNP_12494 | 799  | C | T | 15 | 7  | --     | AUX/IAA |
|            | Ca(ICC2/PI489777)SNP_12495 | 1121 | A | G | 15 | 6  | --     | AUX/IAA |
| CakTC26050 | Ca(ICC2/PI489777)SNP_12496 | 115  | A | T | 5  | 7  | --     | --      |
|            | Ca(ICC2/PI489777)SNP_12497 | 154  | C | G | 5  | 8  | --     | --      |
| CakTC37886 | Ca(ICC2/PI489777)SNP_12498 | 605  | G | T | 14 | 12 | --     | mTERF   |
|            | Ca(ICC2/PI489777)SNP_12499 | 870  | A | C | 16 | 10 | --     | mTERF   |
|            | Ca(ICC2/PI489777)SNP_12500 | 1098 | A | C | 16 | 7  | --     | mTERF   |
| CakTC09629 | Ca(ICC2/PI489777)SNP_12501 | 1495 | T | C | 7  | 3  | --     | --      |

|            |                            |      |   |   |    |    |        |     |
|------------|----------------------------|------|---|---|----|----|--------|-----|
|            | Ca(ICC2/PI489777)SNP_12502 | 1517 | G | A | 6  | 3  | --     | --  |
| CakTC42560 | Ca(ICC2/PI489777)SNP_12503 | 107  | C | A | 23 | 7  | --     | --  |
|            | Ca(ICC2/PI489777)SNP_12504 | 853  | G | A | 43 | 14 | --     | --  |
| CakTC31603 | Ca(ICC2/PI489777)SNP_12505 | 713  | C | T | 19 | 6  | --     | --  |
|            | Ca(ICC2/PI489777)SNP_12506 | 1164 | C | G | 20 | 3  | --     | --  |
|            | Ca(ICC2/PI489777)SNP_12507 | 1366 | A | G | 16 | 5  | --     | --  |
|            | Ca(ICC2/PI489777)SNP_12508 | 1546 | G | T | 13 | 3  | --     | --  |
| CakTC40987 | Ca(ICC2/PI489777)SNP_12509 | 115  | T | A | 3  | 5  | --     | --  |
|            | Ca(ICC2/PI489777)SNP_12510 | 326  | G | A | 20 | 21 | --     | --  |
|            | Ca(ICC2/PI489777)SNP_12511 | 336  | A | C | 24 | 19 | --     | --  |
|            | Ca(ICC2/PI489777)SNP_12512 | 366  | T | C | 23 | 19 | --     | --  |
|            | Ca(ICC2/PI489777)SNP_12513 | 417  | G | A | 23 | 21 | --     | --  |
|            | Ca(ICC2/PI489777)SNP_12514 | 480  | T | C | 25 | 21 | --     | --  |
|            | Ca(ICC2/PI489777)SNP_12515 | 484  | T | G | 22 | 21 | --     | --  |
|            | Ca(ICC2/PI489777)SNP_12516 | 1024 | G | A | 19 | 15 | --     | --  |
|            | Ca(ICC2/PI489777)SNP_12517 | 1341 | A | G | 11 | 14 | --     | --  |
|            | Ca(ICC2/PI489777)SNP_12518 | 1543 | G | A | 18 | 10 | --     | --  |
|            | Ca(ICC2/PI489777)SNP_12519 | 1633 | G | A | 18 | 26 | --     | --  |
| CakTC41150 | Ca(ICC2/PI489777)SNP_12520 | 472  | C | T | 4  | 5  | --     | --  |
|            | Ca(ICC2/PI489777)SNP_12521 | 487  | G | A | 4  | 4  | --     | --  |
|            | Ca(ICC2/PI489777)SNP_12522 | 553  | A | G | 5  | 3  | --     | --  |
|            | Ca(ICC2/PI489777)SNP_12523 | 737  | A | C | 7  | 4  | --     | --  |
|            | Ca(ICC2/PI489777)SNP_12524 | 738  | G | C | 8  | 4  | --     | --  |
|            | Ca(ICC2/PI489777)SNP_12525 | 811  | T | C | 6  | 3  | --     | --  |
|            | Ca(ICC2/PI489777)SNP_12526 | 814  | A | C | 7  | 3  | --     | --  |
|            | Ca(ICC2/PI489777)SNP_12527 | 823  | C | T | 5  | 3  | --     | --  |
|            | Ca(ICC2/PI489777)SNP_12528 | 826  | G | T | 4  | 3  | --     | --  |
|            | Ca(ICC2/PI489777)SNP_12529 | 838  | G | A | 7  | 3  | --     | --  |
|            | Ca(ICC2/PI489777)SNP_12530 | 961  | T | A | 4  | 3  | --     | --  |
|            | Ca(ICC2/PI489777)SNP_12531 | 1015 | G | A | 4  | 3  | --     | --  |
|            | Ca(ICC2/PI489777)SNP_12532 | 1245 | C | A | 12 | 3  | --     | --  |
|            | Ca(ICC2/PI489777)SNP_12533 | 1942 | G | A | 7  | 13 | --     | --  |
|            | Ca(ICC2/PI489777)SNP_12534 | 2106 | T | C | 6  | 3  | --     | --  |
| CakTC23763 | Ca(ICC2/PI489777)SNP_12535 | 149  | C | T | 54 | 22 | --     | --  |
| CakTC26807 | Ca(ICC2/PI489777)SNP_12536 | 1105 | C | T | 20 | 7  | --     | --  |
|            | Ca(ICC2/PI489777)SNP_12537 | 1165 | T | G | 40 | 8  | --     | --  |
|            | Ca(ICC2/PI489777)SNP_12538 | 2183 | A | C | 49 | 21 | --     | --  |
|            | Ca(ICC2/PI489777)SNP_12539 | 2599 | A | T | 51 | 25 | --     | --  |
|            | Ca(ICC2/PI489777)SNP_12540 | 2633 | C | T | 51 | 24 | --     | --  |
|            | Ca(ICC2/PI489777)SNP_12541 | 2686 | A | G | 39 | 19 | --     | --  |
|            | Ca(ICC2/PI489777)SNP_12542 | 2833 | C | T | 32 | 18 | --     | --  |
| CakTC24193 | Ca(ICC2/PI489777)SNP_12543 | 2187 | A | G | 29 | 6  | --     | --  |
| CakTC24968 | Ca(ICC2/PI489777)SNP_12544 | 478  | T | C | 66 | 20 | --     | --  |
|            | Ca(ICC2/PI489777)SNP_12545 | 622  | A | G | 79 | 16 | --     | --  |
| CakTC24499 | Ca(ICC2/PI489777)SNP_12546 | 423  | T | C | 7  | 5  | --     | --  |
|            | Ca(ICC2/PI489777)SNP_12547 | 424  | T | G | 7  | 5  | --     | --  |
|            | Ca(ICC2/PI489777)SNP_12548 | 455  | A | G | 7  | 6  | --     | --  |
|            | Ca(ICC2/PI489777)SNP_12549 | 2294 | G | A | 15 | 8  | --     | --  |
|            | Ca(ICC2/PI489777)SNP_12550 | 2351 | T | C | 15 | 8  | --     | --  |
| CakTC32653 | Ca(ICC2/PI489777)SNP_12551 | 81   | G | A | 61 | 35 | --     | --  |
|            | Ca(ICC2/PI489777)SNP_12552 | 140  | G | T | 61 | 38 | --     | --  |
|            | Ca(ICC2/PI489777)SNP_12553 | 192  | C | T | 64 | 37 | --     | --  |
|            | Ca(ICC2/PI489777)SNP_12554 | 221  | A | G | 63 | 40 | --     | --  |
|            | Ca(ICC2/PI489777)SNP_12555 | 237  | A | T | 64 | 40 | --     | --  |
|            | Ca(ICC2/PI489777)SNP_12556 | 328  | T | G | 20 | 9  | --     | --  |
| CakTC38974 | Ca(ICC2/PI489777)SNP_12557 | 662  | A | G | 5  | 5  | --     | --  |
|            | Ca(ICC2/PI489777)SNP_12558 | 831  | G | A | 10 | 4  | --     | --  |
|            | Ca(ICC2/PI489777)SNP_12559 | 922  | C | T | 10 | 3  | --     | --  |
| CakTC30844 | Ca(ICC2/PI489777)SNP_12560 | 863  | G | A | 9  | 14 | --     | --  |
|            | Ca(ICC2/PI489777)SNP_12561 | 868  | A | G | 10 | 13 | --     | --  |
|            | Ca(ICC2/PI489777)SNP_12562 | 1298 | G | A | 15 | 7  | --     | --  |
|            | Ca(ICC2/PI489777)SNP_12563 | 1562 | G | T | 19 | 10 | --     | --  |
| CakTC30588 | Ca(ICC2/PI489777)SNP_12564 | 399  | A | G | 3  | 4  | --     | --  |
| CakTC43022 | Ca(ICC2/PI489777)SNP_12565 | 950  | G | A | 10 | 3  | --     | --  |
| CakTC27724 | Ca(ICC2/PI489777)SNP_12566 | 395  | C | T | 6  | 4  | Flower | bud |
|            | Ca(ICC2/PI489777)SNP_12567 | 413  | C | T | 4  | 4  | Flower | bud |
| CakTC40234 | Ca(ICC2/PI489777)SNP_12568 | 465  | T | G | 6  | 4  | --     | --  |
| CakTC42584 | Ca(ICC2/PI489777)SNP_12569 | 1262 | G | A | 29 | 19 | --     | --  |
|            | Ca(ICC2/PI489777)SNP_12570 | 1355 | C | T | 35 | 17 | --     | --  |
|            | Ca(ICC2/PI489777)SNP_12571 | 1388 | C | T | 32 | 15 | --     | --  |
| CakTC24720 | Ca(ICC2/PI489777)SNP_12572 | 29   | G | A | 6  | 3  | --     | --  |
|            | Ca(ICC2/PI489777)SNP_12573 | 514  | C | T | 21 | 6  | --     | --  |
| CakTC25299 | Ca(ICC2/PI489777)SNP_12574 | 317  | T | C | 8  | 3  | --     | --  |
|            | Ca(ICC2/PI489777)SNP_12575 | 337  | T | C | 12 | 3  | --     | --  |

|            |                            |      |   |   |     |     |    |          |
|------------|----------------------------|------|---|---|-----|-----|----|----------|
| CakTC34390 | Ca(ICC2/PI489777)SNP_12576 | 294  | G | A | 29  | 6   | -- | --       |
|            | Ca(ICC2/PI489777)SNP_12577 | 404  | A | T | 29  | 6   | -- | --       |
|            | Ca(ICC2/PI489777)SNP_12578 | 406  | G | A | 28  | 5   | -- | --       |
|            | Ca(ICC2/PI489777)SNP_12579 | 946  | C | T | 28  | 6   | -- | --       |
|            | Ca(ICC2/PI489777)SNP_12580 | 996  | C | T | 34  | 5   | -- | --       |
|            | Ca(ICC2/PI489777)SNP_12581 | 1253 | G | A | 33  | 7   | -- | --       |
|            | Ca(ICC2/PI489777)SNP_12582 | 1832 | C | T | 14  | 8   | -- | --       |
| CakTC32036 | Ca(ICC2/PI489777)SNP_12583 | 609  | C | T | 5   | 3   | -- | --       |
|            | Ca(ICC2/PI489777)SNP_12584 | 996  | C | T | 9   | 4   | -- | --       |
|            | Ca(ICC2/PI489777)SNP_12585 | 1448 | A | G | 13  | 7   | -- | --       |
|            | Ca(ICC2/PI489777)SNP_12586 | 2201 | C | T | 8   | 8   | -- | --       |
|            | Ca(ICC2/PI489777)SNP_12587 | 2356 | G | T | 7   | 6   | -- | --       |
|            | Ca(ICC2/PI489777)SNP_12588 | 3792 | G | A | 6   | 12  | -- | --       |
| CakTC27610 | Ca(ICC2/PI489777)SNP_12589 | 420  | A | T | 22  | 16  | -- | --       |
|            | Ca(ICC2/PI489777)SNP_12590 | 690  | A | G | 6   | 6   | -- | --       |
| CakTC28527 | Ca(ICC2/PI489777)SNP_12591 | 626  | A | G | 5   | 7   | -- | --       |
|            | Ca(ICC2/PI489777)SNP_12592 | 1139 | C | T | 16  | 7   | -- | --       |
| CakTC27215 | Ca(ICC2/PI489777)SNP_12593 | 634  | G | A | 48  | 37  | -- | --       |
| CakTC42431 | Ca(ICC2/PI489777)SNP_12594 | 454  | C | T | 5   | 4   | -- | C2C2-Dof |
|            | Ca(ICC2/PI489777)SNP_12595 | 509  | T | C | 5   | 5   | -- | C2C2-Dof |
|            | Ca(ICC2/PI489777)SNP_12596 | 601  | T | A | 5   | 5   | -- | C2C2-Dof |
| CakTC40178 | Ca(ICC2/PI489777)SNP_12597 | 211  | G | C | 16  | 9   | -- | MYB      |
|            | Ca(ICC2/PI489777)SNP_12598 | 379  | T | C | 15  | 9   | -- | MYB      |
|            | Ca(ICC2/PI489777)SNP_12599 | 740  | T | C | 33  | 30  | -- | MYB      |
|            | Ca(ICC2/PI489777)SNP_12600 | 821  | G | A | 29  | 23  | -- | MYB      |
|            | Ca(ICC2/PI489777)SNP_12601 | 872  | C | A | 27  | 29  | -- | MYB      |
|            | Ca(ICC2/PI489777)SNP_12602 | 899  | T | C | 28  | 28  | -- | MYB      |
|            | Ca(ICC2/PI489777)SNP_12603 | 989  | A | G | 45  | 33  | -- | MYB      |
|            | Ca(ICC2/PI489777)SNP_12604 | 1193 | C | G | 36  | 21  | -- | MYB      |
|            | Ca(ICC2/PI489777)SNP_12605 | 1290 | C | G | 39  | 21  | -- | MYB      |
| CakTC42733 | Ca(ICC2/PI489777)SNP_12606 | 572  | A | G | 12  | 16  | -- | --       |
|            | Ca(ICC2/PI489777)SNP_12607 | 686  | C | T | 4   | 10  | -- | --       |
| CakTC35291 | Ca(ICC2/PI489777)SNP_12608 | 651  | A | G | 4   | 11  | -- | --       |
| CakTC39820 | Ca(ICC2/PI489777)SNP_12609 | 146  | A | G | 9   | 6   | -- | --       |
| CakTC40161 | Ca(ICC2/PI489777)SNP_12610 | 1499 | G | A | 90  | 107 | -- | --       |
| CakTC32051 | Ca(ICC2/PI489777)SNP_12611 | 741  | A | T | 24  | 6   | -- | --       |
| CakTC41158 | Ca(ICC2/PI489777)SNP_12612 | 386  | T | C | 7   | 4   | -- | --       |
| CakTC32828 | Ca(ICC2/PI489777)SNP_12613 | 1617 | G | A | 3   | 3   | -- | --       |
|            | Ca(ICC2/PI489777)SNP_12614 | 1624 | T | G | 3   | 3   | -- | --       |
| CakTC38759 | Ca(ICC2/PI489777)SNP_12615 | 206  | G | T | 11  | 5   | -- | --       |
|            | Ca(ICC2/PI489777)SNP_12616 | 1343 | G | A | 4   | 4   | -- | --       |
| CakTC32388 | Ca(ICC2/PI489777)SNP_12617 | 401  | C | A | 8   | 10  | -- | --       |
|            | Ca(ICC2/PI489777)SNP_12618 | 750  | T | A | 3   | 6   | -- | --       |
|            | Ca(ICC2/PI489777)SNP_12619 | 6167 | T | C | 6   | 3   | -- | --       |
| CakTC38360 | Ca(ICC2/PI489777)SNP_12620 | 364  | T | C | 4   | 4   | -- | --       |
| CakTC33858 | Ca(ICC2/PI489777)SNP_12621 | 286  | T | A | 14  | 5   | -- | --       |
|            | Ca(ICC2/PI489777)SNP_12622 | 499  | C | T | 10  | 14  | -- | --       |
|            | Ca(ICC2/PI489777)SNP_12623 | 712  | A | G | 9   | 12  | -- | --       |
|            | Ca(ICC2/PI489777)SNP_12624 | 964  | G | A | 9   | 5   | -- | --       |
|            | Ca(ICC2/PI489777)SNP_12625 | 1126 | G | A | 16  | 5   | -- | --       |
|            | Ca(ICC2/PI489777)SNP_12626 | 1312 | C | T | 9   | 7   | -- | --       |
|            | Ca(ICC2/PI489777)SNP_12627 | 1549 | T | C | 14  | 9   | -- | --       |
|            | Ca(ICC2/PI489777)SNP_12628 | 1672 | A | G | 14  | 9   | -- | --       |
| CakTC29997 | Ca(ICC2/PI489777)SNP_12629 | 1810 | G | T | 3   | 4   | -- | --       |
|            | Ca(ICC2/PI489777)SNP_12630 | 1918 | G | A | 3   | 4   | -- | --       |
|            | Ca(ICC2/PI489777)SNP_12631 | 2016 | T | C | 3   | 4   | -- | --       |
|            | Ca(ICC2/PI489777)SNP_12632 | 2021 | T | C | 3   | 3   | -- | --       |
|            | Ca(ICC2/PI489777)SNP_12633 | 2110 | C | A | 3   | 5   | -- | --       |
| CakTC24239 | Ca(ICC2/PI489777)SNP_12634 | 827  | G | A | 10  | 9   | -- | CCHC     |
|            | Ca(ICC2/PI489777)SNP_12635 | 973  | C | A | 4   | 5   | -- | CCHC     |
| CakTC35873 | Ca(ICC2/PI489777)SNP_12636 | 726  | C | G | 7   | 6   | -- | --       |
|            | Ca(ICC2/PI489777)SNP_12637 | 2432 | C | T | 4   | 3   | -- | --       |
|            | Ca(ICC2/PI489777)SNP_12638 | 3401 | G | A | 4   | 5   | -- | --       |
| CakTC10613 | Ca(ICC2/PI489777)SNP_12639 | 1141 | T | C | 4   | 4   | -- | --       |
| CakTC37887 | Ca(ICC2/PI489777)SNP_12640 | 523  | T | C | 16  | 7   | -- | --       |
| CakTC40951 | Ca(ICC2/PI489777)SNP_12641 | 149  | C | T | 113 | 54  | -- | --       |
|            | Ca(ICC2/PI489777)SNP_12642 | 224  | C | A | 137 | 56  | -- | --       |
|            | Ca(ICC2/PI489777)SNP_12643 | 357  | G | T | 131 | 68  | -- | --       |
| CakTC29675 | Ca(ICC2/PI489777)SNP_12644 | 377  | C | T | 5   | 5   | -- | --       |
|            | Ca(ICC2/PI489777)SNP_12645 | 382  | C | A | 5   | 5   | -- | --       |
|            | Ca(ICC2/PI489777)SNP_12646 | 1420 | T | C | 6   | 3   | -- | --       |
| CakTC31332 | Ca(ICC2/PI489777)SNP_12647 | 256  | C | A | 22  | 9   | -- | --       |
|            | Ca(ICC2/PI489777)SNP_12648 | 2274 | C | T | 16  | 14  | -- | --       |
| CakTC32819 | Ca(ICC2/PI489777)SNP_12649 | 111  | C | T | 3   | 3   | -- | --       |

|            |                             |      |   |   |    |    |    |           |
|------------|-----------------------------|------|---|---|----|----|----|-----------|
| CakTC27098 | Ca(ICCV2/PI489777)SNP_12650 | 734  | C | A | 4  | 5  | -- | --        |
| CakTC39801 | Ca(ICCV2/PI489777)SNP_12651 | 159  | T | C | 5  | 7  | -- | --        |
|            | Ca(ICCV2/PI489777)SNP_12652 | 473  | C | T | 5  | 8  | -- | --        |
| CakTC29943 | Ca(ICCV2/PI489777)SNP_12653 | 643  | C | G | 3  | 5  | -- | --        |
|            | Ca(ICCV2/PI489777)SNP_12654 | 676  | A | T | 3  | 5  | -- | --        |
|            | Ca(ICCV2/PI489777)SNP_12655 | 724  | T | C | 4  | 6  | -- | --        |
|            | Ca(ICCV2/PI489777)SNP_12656 | 964  | T | C | 7  | 7  | -- | --        |
|            | Ca(ICCV2/PI489777)SNP_12657 | 1034 | C | A | 8  | 7  | -- | --        |
|            | Ca(ICCV2/PI489777)SNP_12658 | 1459 | A | G | 7  | 4  | -- | --        |
|            | Ca(ICCV2/PI489777)SNP_12659 | 3958 | A | G | 8  | 6  | -- | --        |
|            | Ca(ICCV2/PI489777)SNP_12660 | 4361 | T | A | 11 | 7  | -- | --        |
|            | Ca(ICCV2/PI489777)SNP_12661 | 5263 | C | T | 18 | 11 | -- | --        |
| CakTC37972 | Ca(ICCV2/PI489777)SNP_12662 | 668  | C | T | 9  | 6  | -- | --        |
| CakTC29890 | Ca(ICCV2/PI489777)SNP_12663 | 282  | C | T | 5  | 9  | -- | --        |
|            | Ca(ICCV2/PI489777)SNP_12664 | 1208 | T | A | 5  | 3  | -- | --        |
|            | Ca(ICCV2/PI489777)SNP_12665 | 1823 | A | G | 7  | 4  | -- | --        |
| CakTC38594 | Ca(ICCV2/PI489777)SNP_12666 | 857  | A | G | 3  | 4  | -- | --        |
|            | Ca(ICCV2/PI489777)SNP_12667 | 865  | C | T | 3  | 4  | -- | --        |
| CakTC40446 | Ca(ICCV2/PI489777)SNP_12668 | 63   | A | G | 7  | 7  | -- | --        |
|            | Ca(ICCV2/PI489777)SNP_12669 | 221  | G | C | 7  | 10 | -- | --        |
| CakTC38426 | Ca(ICCV2/PI489777)SNP_12670 | 221  | C | T | 6  | 7  | -- | --        |
|            | Ca(ICCV2/PI489777)SNP_12671 | 399  | C | T | 12 | 11 | -- | --        |
|            | Ca(ICCV2/PI489777)SNP_12672 | 494  | T | C | 23 | 14 | -- | --        |
|            | Ca(ICCV2/PI489777)SNP_12673 | 588  | A | G | 26 | 11 | -- | --        |
|            | Ca(ICCV2/PI489777)SNP_12674 | 650  | C | T | 34 | 13 | -- | --        |
|            | Ca(ICCV2/PI489777)SNP_12675 | 714  | C | T | 33 | 8  | -- | --        |
|            | Ca(ICCV2/PI489777)SNP_12676 | 779  | C | T | 37 | 9  | -- | --        |
|            | Ca(ICCV2/PI489777)SNP_12677 | 809  | G | A | 29 | 9  | -- | --        |
| CakTC35856 | Ca(ICCV2/PI489777)SNP_12678 | 91   | G | A | 3  | 3  | -- | --        |
|            | Ca(ICCV2/PI489777)SNP_12679 | 92   | C | T | 3  | 3  | -- | --        |
|            | Ca(ICCV2/PI489777)SNP_12680 | 120  | C | T | 3  | 3  | -- | --        |
| CakTC10262 | Ca(ICCV2/PI489777)SNP_12681 | 615  | A | T | 5  | 3  | -- | --        |
|            | Ca(ICCV2/PI489777)SNP_12682 | 1315 | C | T | 9  | 9  | -- | --        |
| CakTC27973 | Ca(ICCV2/PI489777)SNP_12683 | 2255 | T | A | 9  | 3  | -- | --        |
|            | Ca(ICCV2/PI489777)SNP_12684 | 2329 | C | T | 7  | 3  | -- | --        |
|            | Ca(ICCV2/PI489777)SNP_12685 | 2546 | C | T | 9  | 9  | -- | --        |
|            | Ca(ICCV2/PI489777)SNP_12686 | 2570 | C | T | 8  | 8  | -- | --        |
|            | Ca(ICCV2/PI489777)SNP_12687 | 2571 | A | G | 6  | 8  | -- | --        |
|            | Ca(ICCV2/PI489777)SNP_12688 | 2892 | A | T | 5  | 7  | -- | --        |
| CakTC06170 | Ca(ICCV2/PI489777)SNP_12689 | 443  | A | G | 6  | 4  | -- | --        |
| CakTC39081 | Ca(ICCV2/PI489777)SNP_12690 | 386  | C | T | 15 | 9  | -- | C2C2-GATA |
|            | Ca(ICCV2/PI489777)SNP_12691 | 464  | T | C | 14 | 3  | -- | C2C2-GATA |
|            | Ca(ICCV2/PI489777)SNP_12692 | 585  | A | T | 17 | 7  | -- | C2C2-GATA |
|            | Ca(ICCV2/PI489777)SNP_12693 | 734  | T | C | 14 | 6  | -- | C2C2-GATA |
|            | Ca(ICCV2/PI489777)SNP_12694 | 848  | C | T | 16 | 8  | -- | C2C2-GATA |
|            | Ca(ICCV2/PI489777)SNP_12695 | 849  | A | G | 16 | 8  | -- | C2C2-GATA |
|            | Ca(ICCV2/PI489777)SNP_12696 | 960  | G | A | 16 | 7  | -- | C2C2-GATA |
| CakTC32974 | Ca(ICCV2/PI489777)SNP_12697 | 217  | G | C | 21 | 4  | -- | --        |
|            | Ca(ICCV2/PI489777)SNP_12698 | 310  | C | T | 21 | 4  | -- | --        |
| CakTC24599 | Ca(ICCV2/PI489777)SNP_12699 | 901  | C | T | 77 | 34 | -- | --        |
| CakTC25030 | Ca(ICCV2/PI489777)SNP_12700 | 485  | G | C | 37 | 14 | -- | --        |
|            | Ca(ICCV2/PI489777)SNP_12701 | 1052 | T | C | 66 | 28 | -- | --        |
| CakTC23412 | Ca(ICCV2/PI489777)SNP_12702 | 2218 | A | G | 7  | 3  | -- | --        |
| CakTC11026 | Ca(ICCV2/PI489777)SNP_12703 | 176  | C | T | 11 | 10 | -- | --        |
| CakTC24353 | Ca(ICCV2/PI489777)SNP_12704 | 321  | A | T | 11 | 14 | -- | --        |
| CakTC38551 | Ca(ICCV2/PI489777)SNP_12705 | 64   | G | A | 5  | 4  | -- | --        |
|            | Ca(ICCV2/PI489777)SNP_12706 | 154  | A | C | 5  | 4  | -- | --        |
|            | Ca(ICCV2/PI489777)SNP_12707 | 222  | C | T | 7  | 6  | -- | --        |
|            | Ca(ICCV2/PI489777)SNP_12708 | 262  | T | C | 8  | 6  | -- | --        |
|            | Ca(ICCV2/PI489777)SNP_12709 | 273  | C | G | 8  | 6  | -- | --        |
|            | Ca(ICCV2/PI489777)SNP_12710 | 291  | A | G | 8  | 6  | -- | --        |
| CakTC37165 | Ca(ICCV2/PI489777)SNP_12711 | 840  | A | G | 17 | 5  | -- | --        |
|            | Ca(ICCV2/PI489777)SNP_12712 | 859  | T | G | 17 | 5  | -- | --        |
|            | Ca(ICCV2/PI489777)SNP_12713 | 1120 | A | T | 11 | 8  | -- | --        |
| CakTC41828 | Ca(ICCV2/PI489777)SNP_12714 | 53   | C | T | 5  | 6  | -- | --        |
|            | Ca(ICCV2/PI489777)SNP_12715 | 120  | C | T | 15 | 9  | -- | --        |
|            | Ca(ICCV2/PI489777)SNP_12716 | 689  | A | T | 6  | 5  | -- | --        |
|            | Ca(ICCV2/PI489777)SNP_12717 | 779  | G | A | 4  | 4  | -- | --        |
|            | Ca(ICCV2/PI489777)SNP_12718 | 815  | A | G | 4  | 4  | -- | --        |
|            | Ca(ICCV2/PI489777)SNP_12719 | 870  | G | C | 3  | 4  | -- | --        |
| CakTC27460 | Ca(ICCV2/PI489777)SNP_12720 | 318  | A | C | 5  | 3  | -- | --        |
|            | Ca(ICCV2/PI489777)SNP_12721 | 326  | C | T | 6  | 3  | -- | --        |
|            | Ca(ICCV2/PI489777)SNP_12722 | 374  | C | T | 8  | 3  | -- | --        |
|            | Ca(ICCV2/PI489777)SNP_12723 | 396  | A | G | 8  | 3  | -- | --        |

|            |                            |      |   |   |     |    |           |             |
|------------|----------------------------|------|---|---|-----|----|-----------|-------------|
|            | Ca(ICC2/PI489777)SNP_12724 | 399  | A | T | 7   | 3  | --        | --          |
|            | Ca(ICC2/PI489777)SNP_12725 | 407  | A | G | 6   | 3  | --        | --          |
|            | Ca(ICC2/PI489777)SNP_12726 | 410  | A | G | 7   | 3  | --        | --          |
|            | Ca(ICC2/PI489777)SNP_12727 | 434  | C | T | 8   | 3  | --        | --          |
|            | Ca(ICC2/PI489777)SNP_12728 | 438  | G | T | 7   | 3  | --        | --          |
| CakTC26942 | Ca(ICC2/PI489777)SNP_12729 | 309  | C | T | 77  | 36 | --        | MYB-related |
|            | Ca(ICC2/PI489777)SNP_12730 | 372  | A | G | 90  | 59 | --        | MYB-related |
|            | Ca(ICC2/PI489777)SNP_12731 | 885  | A | G | 134 | 52 | --        | MYB-related |
|            | Ca(ICC2/PI489777)SNP_12732 | 999  | C | T | 89  | 42 | --        | MYB-related |
|            | Ca(ICC2/PI489777)SNP_12733 | 1028 | T | G | 77  | 40 | --        | MYB-related |
|            | Ca(ICC2/PI489777)SNP_12734 | 1044 | T | A | 63  | 38 | --        | MYB-related |
|            | Ca(ICC2/PI489777)SNP_12735 | 1279 | T | G | 83  | 31 | --        | MYB-related |
|            | Ca(ICC2/PI489777)SNP_12736 | 1380 | G | A | 69  | 32 | --        | MYB-related |
|            | Ca(ICC2/PI489777)SNP_12737 | 1550 | C | T | 86  | 30 | --        | MYB-related |
|            | Ca(ICC2/PI489777)SNP_12738 | 2129 | A | C | 69  | 32 | --        | MYB-related |
|            | Ca(ICC2/PI489777)SNP_12739 | 2795 | A | G | 18  | 22 | --        | MYB-related |
| CakTC40521 | Ca(ICC2/PI489777)SNP_12740 | 258  | A | G | 8   | 6  | --        | --          |
| CakTC38430 | Ca(ICC2/PI489777)SNP_12741 | 904  | A | G | 6   | 14 | --        | --          |
| CakTC30795 | Ca(ICC2/PI489777)SNP_12742 | 320  | C | T | 4   | 3  | --        | --          |
| CakTC34237 | Ca(ICC2/PI489777)SNP_12743 | 297  | T | C | 56  | 21 | --        | --          |
|            | Ca(ICC2/PI489777)SNP_12744 | 308  | G | A | 63  | 21 | --        | --          |
|            | Ca(ICC2/PI489777)SNP_12745 | 468  | A | G | 65  | 18 | --        | --          |
|            | Ca(ICC2/PI489777)SNP_12746 | 554  | A | G | 23  | 8  | --        | --          |
| CakTC34994 | Ca(ICC2/PI489777)SNP_12747 | 556  | C | T | 4   | 3  | --        | --          |
| CakTC39722 | Ca(ICC2/PI489777)SNP_12748 | 814  | T | C | 20  | 20 | --        | --          |
|            | Ca(ICC2/PI489777)SNP_12749 | 956  | T | C | 20  | 15 | --        | --          |
|            | Ca(ICC2/PI489777)SNP_12750 | 1078 | G | A | 12  | 10 | --        | --          |
|            | Ca(ICC2/PI489777)SNP_12751 | 1206 | G | A | 5   | 4  | --        | --          |
| CakTC40863 | Ca(ICC2/PI489777)SNP_12752 | 885  | T | C | 15  | 19 | --        | --          |
|            | Ca(ICC2/PI489777)SNP_12753 | 1004 | C | T | 17  | 21 | --        | --          |
|            | Ca(ICC2/PI489777)SNP_12754 | 1026 | C | T | 17  | 20 | --        | --          |
|            | Ca(ICC2/PI489777)SNP_12755 | 1245 | C | A | 19  | 18 | --        | --          |
|            | Ca(ICC2/PI489777)SNP_12756 | 1441 | C | T | 34  | 11 | --        | --          |
|            | Ca(ICC2/PI489777)SNP_12757 | 1582 | G | A | 38  | 16 | --        | --          |
|            | Ca(ICC2/PI489777)SNP_12758 | 2078 | G | A | 8   | 18 | --        | --          |
|            | Ca(ICC2/PI489777)SNP_12759 | 2138 | G | T | 7   | 4  | --        | --          |
| CakTC25449 | Ca(ICC2/PI489777)SNP_12760 | 735  | T | C | 18  | 9  | --        | ARF         |
| CakTC32767 | Ca(ICC2/PI489777)SNP_12761 | 1536 | A | G | 7   | 7  | --        | --          |
| CakTC31537 | Ca(ICC2/PI489777)SNP_12762 | 904  | T | C | 30  | 5  | --        | --          |
|            | Ca(ICC2/PI489777)SNP_12763 | 1098 | A | T | 10  | 3  | --        | --          |
| CakTC27849 | Ca(ICC2/PI489777)SNP_12764 | 444  | T | C | 16  | 12 | --        | --          |
|            | Ca(ICC2/PI489777)SNP_12765 | 1554 | C | A | 15  | 10 | --        | --          |
|            | Ca(ICC2/PI489777)SNP_12766 | 1800 | G | C | 14  | 5  | --        | --          |
| CakTC38280 | Ca(ICC2/PI489777)SNP_12767 | 198  | A | G | 5   | 5  | --        | --          |
|            | Ca(ICC2/PI489777)SNP_12768 | 295  | G | A | 6   | 7  | --        | --          |
| CakTC29396 | Ca(ICC2/PI489777)SNP_12769 | 2442 | G | A | 3   | 3  | --        | --          |
| CakTC25029 | Ca(ICC2/PI489777)SNP_12770 | 157  | G | A | 11  | 5  | --        | --          |
|            | Ca(ICC2/PI489777)SNP_12771 | 1271 | A | T | 17  | 9  | --        | --          |
| CakTC25434 | Ca(ICC2/PI489777)SNP_12772 | 1462 | A | C | 9   | 12 | --        | --          |
|            | Ca(ICC2/PI489777)SNP_12773 | 1596 | G | A | 8   | 11 | --        | --          |
| CakTC25606 | Ca(ICC2/PI489777)SNP_12774 | 1473 | T | C | 4   | 4  | Young_pod | --          |
|            | Ca(ICC2/PI489777)SNP_12775 | 1526 | G | A | 4   | 3  | Young_pod | --          |
|            | Ca(ICC2/PI489777)SNP_12776 | 1530 | T | G | 4   | 3  | Young_pod | --          |
| CakTC01660 | Ca(ICC2/PI489777)SNP_12777 | 440  | C | T | 9   | 10 | --        | --          |
|            | Ca(ICC2/PI489777)SNP_12778 | 660  | C | T | 10  | 5  | --        | --          |
|            | Ca(ICC2/PI489777)SNP_12779 | 713  | C | G | 7   | 4  | --        | --          |
|            | Ca(ICC2/PI489777)SNP_12780 | 1191 | G | A | 16  | 4  | --        | --          |
|            | Ca(ICC2/PI489777)SNP_12781 | 1997 | A | T | 5   | 3  | --        | --          |
| CakTC36839 | Ca(ICC2/PI489777)SNP_12782 | 828  | T | C | 19  | 16 | --        | --          |
|            | Ca(ICC2/PI489777)SNP_12783 | 2139 | C | T | 11  | 7  | --        | --          |
|            | Ca(ICC2/PI489777)SNP_12784 | 2225 | C | T | 10  | 3  | --        | --          |
| CakTC38799 | Ca(ICC2/PI489777)SNP_12785 | 581  | C | T | 10  | 6  | --        | --          |
|            | Ca(ICC2/PI489777)SNP_12786 | 992  | C | T | 20  | 6  | --        | --          |
|            | Ca(ICC2/PI489777)SNP_12787 | 1061 | T | C | 14  | 11 | --        | --          |
| CakTC37704 | Ca(ICC2/PI489777)SNP_12788 | 755  | G | A | 21  | 3  | --        | --          |
| CakTC36310 | Ca(ICC2/PI489777)SNP_12789 | 107  | G | A | 3   | 7  | --        | --          |
|            | Ca(ICC2/PI489777)SNP_12790 | 123  | C | T | 3   | 9  | --        | --          |
|            | Ca(ICC2/PI489777)SNP_12791 | 296  | G | A | 27  | 34 | --        | --          |
|            | Ca(ICC2/PI489777)SNP_12792 | 541  | G | A | 16  | 35 | --        | --          |
| CakTC37456 | Ca(ICC2/PI489777)SNP_12793 | 742  | G | A | 14  | 6  | --        | --          |
|            | Ca(ICC2/PI489777)SNP_12794 | 1054 | A | G | 6   | 5  | --        | --          |
|            | Ca(ICC2/PI489777)SNP_12795 | 1103 | T | C | 5   | 5  | --        | --          |
|            | Ca(ICC2/PI489777)SNP_12796 | 1123 | A | G | 5   | 4  | --        | --          |
| CakTC27375 | Ca(ICC2/PI489777)SNP_12797 | 1502 | G | C | 6   | 4  | Root      | --          |

|            |                             |      |   |   |     |    |      |         |
|------------|-----------------------------|------|---|---|-----|----|------|---------|
|            | Ca(ICCV2/PI489777)SNP_12798 | 1586 | A | G | 8   | 5  | Root | --      |
| CakTC38039 | Ca(ICCV2/PI489777)SNP_12799 | 119  | A | T | 5   | 3  | --   | --      |
| CakTC24692 | Ca(ICCV2/PI489777)SNP_12800 | 402  | C | T | 13  | 3  | --   | HB      |
|            | Ca(ICCV2/PI489777)SNP_12801 | 403  | A | G | 12  | 3  | --   | HB      |
|            | Ca(ICCV2/PI489777)SNP_12802 | 563  | A | G | 29  | 4  | --   | HB      |
|            | Ca(ICCV2/PI489777)SNP_12803 | 1333 | C | T | 92  | 11 | --   | HB      |
|            | Ca(ICCV2/PI489777)SNP_12804 | 1354 | C | T | 101 | 11 | --   | HB      |
|            | Ca(ICCV2/PI489777)SNP_12805 | 1390 | T | C | 106 | 12 | --   | HB      |
|            | Ca(ICCV2/PI489777)SNP_12806 | 1429 | C | G | 106 | 11 | --   | HB      |
|            | Ca(ICCV2/PI489777)SNP_12807 | 2174 | T | G | 118 | 20 | --   | HB      |
| CakTC35837 | Ca(ICCV2/PI489777)SNP_12808 | 2401 | G | A | 4   | 3  | --   | --      |
|            | Ca(ICCV2/PI489777)SNP_12809 | 2950 | C | T | 4   | 5  | --   | --      |
| CakTC28543 | Ca(ICCV2/PI489777)SNP_12810 | 1061 | G | A | 5   | 4  | --   | --      |
|            | Ca(ICCV2/PI489777)SNP_12811 | 1332 | C | A | 16  | 4  | --   | --      |
| CakTC40689 | Ca(ICCV2/PI489777)SNP_12812 | 155  | G | A | 5   | 7  | --   | --      |
|            | Ca(ICCV2/PI489777)SNP_12813 | 436  | G | A | 5   | 8  | --   | --      |
|            | Ca(ICCV2/PI489777)SNP_12814 | 584  | T | A | 3   | 6  | --   | --      |
|            | Ca(ICCV2/PI489777)SNP_12815 | 592  | C | T | 3   | 7  | --   | --      |
| CakTC38614 | Ca(ICCV2/PI489777)SNP_12816 | 65   | C | G | 8   | 3  | --   | --      |
|            | Ca(ICCV2/PI489777)SNP_12817 | 85   | C | G | 9   | 3  | --   | --      |
|            | Ca(ICCV2/PI489777)SNP_12818 | 131  | A | G | 7   | 8  | --   | --      |
|            | Ca(ICCV2/PI489777)SNP_12819 | 899  | C | T | 51  | 33 | --   | --      |
|            | Ca(ICCV2/PI489777)SNP_12820 | 902  | C | T | 51  | 34 | --   | --      |
| CakTC34917 | Ca(ICCV2/PI489777)SNP_12821 | 504  | A | G | 42  | 17 | --   | --      |
| CakTC31981 | Ca(ICCV2/PI489777)SNP_12822 | 414  | C | T | 7   | 5  | --   | --      |
| CakTC40507 | Ca(ICCV2/PI489777)SNP_12823 | 57   | G | A | 13  | 8  | --   | HMG     |
|            | Ca(ICCV2/PI489777)SNP_12824 | 481  | T | C | 4   | 7  | --   | HMG     |
|            | Ca(ICCV2/PI489777)SNP_12825 | 535  | T | A | 3   | 5  | --   | HMG     |
|            | Ca(ICCV2/PI489777)SNP_12826 | 536  | G | A | 3   | 5  | --   | HMG     |
| CakTC26614 | Ca(ICCV2/PI489777)SNP_12827 | 437  | C | A | 37  | 6  | --   | --      |
|            | Ca(ICCV2/PI489777)SNP_12828 | 884  | C | T | 19  | 4  | --   | --      |
|            | Ca(ICCV2/PI489777)SNP_12829 | 2290 | T | G | 12  | 3  | --   | --      |
|            | Ca(ICCV2/PI489777)SNP_12830 | 2477 | A | C | 13  | 7  | --   | --      |
| CakTC17204 | Ca(ICCV2/PI489777)SNP_12831 | 455  | T | C | 3   | 5  | --   | --      |
| CakTC40890 | Ca(ICCV2/PI489777)SNP_12832 | 917  | C | T | 13  | 25 | --   | TPR     |
|            | Ca(ICCV2/PI489777)SNP_12833 | 980  | T | C | 11  | 26 | --   | TPR     |
|            | Ca(ICCV2/PI489777)SNP_12834 | 1055 | T | C | 12  | 23 | --   | TPR     |
| CakTC37444 | Ca(ICCV2/PI489777)SNP_12835 | 757  | C | A | 23  | 17 | --   | --      |
| CakTC43386 | Ca(ICCV2/PI489777)SNP_12836 | 799  | A | G | 8   | 4  | --   | --      |
| CakTC35089 | Ca(ICCV2/PI489777)SNP_12837 | 201  | C | T | 15  | 9  | --   | --      |
|            | Ca(ICCV2/PI489777)SNP_12838 | 1400 | A | G | 11  | 7  | --   | --      |
|            | Ca(ICCV2/PI489777)SNP_12839 | 1664 | T | C | 25  | 8  | --   | --      |
|            | Ca(ICCV2/PI489777)SNP_12840 | 1742 | G | A | 27  | 8  | --   | --      |
| CakTC22251 | Ca(ICCV2/PI489777)SNP_12841 | 189  | G | A | 3   | 3  | --   | --      |
|            | Ca(ICCV2/PI489777)SNP_12842 | 190  | T | G | 3   | 3  | --   | --      |
|            | Ca(ICCV2/PI489777)SNP_12843 | 340  | G | A | 3   | 4  | --   | --      |
| CakTC37234 | Ca(ICCV2/PI489777)SNP_12844 | 510  | T | C | 21  | 13 | --   | --      |
|            | Ca(ICCV2/PI489777)SNP_12845 | 537  | C | T | 19  | 13 | --   | --      |
|            | Ca(ICCV2/PI489777)SNP_12846 | 560  | C | G | 17  | 10 | --   | --      |
|            | Ca(ICCV2/PI489777)SNP_12847 | 561  | C | T | 17  | 12 | --   | --      |
|            | Ca(ICCV2/PI489777)SNP_12848 | 588  | A | T | 15  | 9  | --   | --      |
| CakTC09300 | Ca(ICCV2/PI489777)SNP_12849 | 515  | T | G | 3   | 3  | --   | --      |
| CakTC08512 | Ca(ICCV2/PI489777)SNP_12850 | 1039 | A | G | 4   | 4  | --   | --      |
| CakTC14371 | Ca(ICCV2/PI489777)SNP_12851 | 390  | T | G | 10  | 10 | --   | --      |
|            | Ca(ICCV2/PI489777)SNP_12852 | 1446 | T | A | 11  | 7  | --   | --      |
|            | Ca(ICCV2/PI489777)SNP_12853 | 1451 | A | T | 11  | 7  | --   | --      |
| CakTC34206 | Ca(ICCV2/PI489777)SNP_12854 | 230  | C | G | 123 | 16 | --   | --      |
|            | Ca(ICCV2/PI489777)SNP_12855 | 666  | T | C | 156 | 36 | --   | --      |
| CakTC38212 | Ca(ICCV2/PI489777)SNP_12856 | 25   | A | T | 8   | 10 | --   | --      |
|            | Ca(ICCV2/PI489777)SNP_12857 | 622  | C | G | 41  | 64 | --   | --      |
| CakTC43013 | Ca(ICCV2/PI489777)SNP_12858 | 812  | C | T | 10  | 3  | --   | --      |
|            | Ca(ICCV2/PI489777)SNP_12859 | 833  | C | T | 11  | 4  | --   | --      |
|            | Ca(ICCV2/PI489777)SNP_12860 | 923  | A | G | 11  | 4  | --   | --      |
| CakTC41241 | Ca(ICCV2/PI489777)SNP_12861 | 464  | C | T | 8   | 6  | --   | --      |
|            | Ca(ICCV2/PI489777)SNP_12862 | 602  | A | T | 4   | 4  | --   | --      |
| CakTC24815 | Ca(ICCV2/PI489777)SNP_12863 | 441  | G | A | 43  | 38 | --   | AUX/IAA |
|            | Ca(ICCV2/PI489777)SNP_12864 | 596  | T | C | 14  | 10 | --   | AUX/IAA |
|            | Ca(ICCV2/PI489777)SNP_12865 | 644  | T | C | 10  | 4  | --   | AUX/IAA |
| CakTC37373 | Ca(ICCV2/PI489777)SNP_12866 | 778  | G | A | 5   | 3  | --   | --      |
|            | Ca(ICCV2/PI489777)SNP_12867 | 1327 | C | G | 9   | 7  | --   | --      |
|            | Ca(ICCV2/PI489777)SNP_12868 | 1383 | G | T | 5   | 7  | --   | --      |
| CakTC38163 | Ca(ICCV2/PI489777)SNP_12869 | 106  | G | A | 5   | 3  | --   | --      |
|            | Ca(ICCV2/PI489777)SNP_12870 | 433  | G | A | 30  | 19 | --   | --      |
|            | Ca(ICCV2/PI489777)SNP_12871 | 645  | A | G | 23  | 18 | --   | --      |

|            |                            |      |   |   |    |    |      |              |
|------------|----------------------------|------|---|---|----|----|------|--------------|
|            | Ca(ICC2/PI489777)SNP_12872 | 910  | G | A | 17 | 15 | --   | --           |
| CakTC24902 | Ca(ICC2/PI489777)SNP_12873 | 85   | C | T | 36 | 6  | --   | AP2-EREBP    |
|            | Ca(ICC2/PI489777)SNP_12874 | 87   | C | G | 37 | 6  | --   | AP2-EREBP    |
|            | Ca(ICC2/PI489777)SNP_12875 | 341  | C | T | 50 | 10 | --   | AP2-EREBP    |
| CakTC02589 | Ca(ICC2/PI489777)SNP_12876 | 223  | G | C | 6  | 3  | --   | --           |
|            | Ca(ICC2/PI489777)SNP_12877 | 225  | A | C | 6  | 4  | --   | --           |
|            | Ca(ICC2/PI489777)SNP_12878 | 300  | A | T | 4  | 5  | --   | --           |
|            | Ca(ICC2/PI489777)SNP_12879 | 690  | G | A | 5  | 6  | --   | --           |
|            | Ca(ICC2/PI489777)SNP_12880 | 702  | G | C | 7  | 6  | --   | --           |
| CakTC39772 | Ca(ICC2/PI489777)SNP_12881 | 448  | C | T | 4  | 4  | --   | --           |
|            | Ca(ICC2/PI489777)SNP_12882 | 476  | T | C | 5  | 4  | --   | --           |
|            | Ca(ICC2/PI489777)SNP_12883 | 562  | T | C | 3  | 3  | --   | --           |
|            | Ca(ICC2/PI489777)SNP_12884 | 601  | G | T | 4  | 3  | --   | --           |
|            | Ca(ICC2/PI489777)SNP_12885 | 634  | T | C | 3  | 5  | --   | --           |
| CakTC25191 | Ca(ICC2/PI489777)SNP_12886 | 183  | A | C | 5  | 40 | --   | --           |
|            | Ca(ICC2/PI489777)SNP_12887 | 538  | T | A | 12 | 55 | --   | --           |
|            | Ca(ICC2/PI489777)SNP_12888 | 542  | C | G | 12 | 57 | --   | --           |
|            | Ca(ICC2/PI489777)SNP_12889 | 584  | C | A | 13 | 48 | --   | --           |
|            | Ca(ICC2/PI489777)SNP_12890 | 633  | C | G | 12 | 41 | --   | --           |
|            | Ca(ICC2/PI489777)SNP_12891 | 642  | G | T | 13 | 41 | --   | --           |
|            | Ca(ICC2/PI489777)SNP_12892 | 656  | A | G | 10 | 42 | --   | --           |
|            | Ca(ICC2/PI489777)SNP_12893 | 815  | C | A | 22 | 35 | --   | --           |
|            | Ca(ICC2/PI489777)SNP_12894 | 854  | G | C | 22 | 38 | --   | --           |
|            | Ca(ICC2/PI489777)SNP_12895 | 1468 | A | G | 15 | 50 | --   | --           |
|            | Ca(ICC2/PI489777)SNP_12896 | 1486 | T | C | 13 | 56 | --   | --           |
|            | Ca(ICC2/PI489777)SNP_12897 | 1726 | A | C | 20 | 60 | --   | --           |
|            | Ca(ICC2/PI489777)SNP_12898 | 1758 | G | A | 21 | 59 | --   | --           |
|            | Ca(ICC2/PI489777)SNP_12899 | 1894 | C | T | 17 | 53 | --   | --           |
|            | Ca(ICC2/PI489777)SNP_12900 | 2499 | T | C | 13 | 29 | --   | --           |
|            | Ca(ICC2/PI489777)SNP_12901 | 2500 | A | T | 13 | 29 | --   | --           |
| CakTC08729 | Ca(ICC2/PI489777)SNP_12902 | 462  | C | T | 19 | 5  | --   | --           |
| CakTC42519 | Ca(ICC2/PI489777)SNP_12903 | 125  | C | G | 5  | 6  | --   | --           |
|            | Ca(ICC2/PI489777)SNP_12904 | 519  | C | T | 8  | 27 | --   | --           |
|            | Ca(ICC2/PI489777)SNP_12905 | 767  | C | T | 7  | 12 | --   | --           |
| CakTC08831 | Ca(ICC2/PI489777)SNP_12906 | 611  | T | C | 12 | 5  | --   | --           |
|            | Ca(ICC2/PI489777)SNP_12907 | 629  | A | G | 13 | 6  | --   | --           |
|            | Ca(ICC2/PI489777)SNP_12908 | 1682 | G | A | 4  | 3  | --   | --           |
|            | Ca(ICC2/PI489777)SNP_12909 | 2043 | C | T | 6  | 4  | --   | --           |
|            | Ca(ICC2/PI489777)SNP_12910 | 2352 | A | C | 3  | 4  | --   | --           |
| CakTC10275 | Ca(ICC2/PI489777)SNP_12911 | 556  | C | G | 4  | 4  | --   | CCHC         |
|            | Ca(ICC2/PI489777)SNP_12912 | 598  | A | G | 4  | 4  | --   | CCHC         |
|            | Ca(ICC2/PI489777)SNP_12913 | 630  | C | T | 4  | 4  | --   | CCHC         |
|            | Ca(ICC2/PI489777)SNP_12914 | 684  | G | A | 4  | 3  | --   | CCHC         |
| CakTC12538 | Ca(ICC2/PI489777)SNP_12915 | 756  | G | A | 17 | 4  | --   | --           |
| CakTC19054 | Ca(ICC2/PI489777)SNP_12916 | 732  | G | A | 6  | 4  | --   | --           |
|            | Ca(ICC2/PI489777)SNP_12917 | 760  | G | A | 4  | 3  | --   | --           |
| CakTC25213 | Ca(ICC2/PI489777)SNP_12918 | 201  | A | G | 7  | 3  | Root | --           |
|            | Ca(ICC2/PI489777)SNP_12919 | 211  | G | A | 9  | 3  | Root | --           |
| CakTC42461 | Ca(ICC2/PI489777)SNP_12920 | 389  | A | T | 5  | 5  | --   | --           |
|            | Ca(ICC2/PI489777)SNP_12921 | 461  | G | C | 7  | 8  | --   | --           |
| CakTC42387 | Ca(ICC2/PI489777)SNP_12922 | 28   | T | C | 3  | 6  | --   | --           |
|            | Ca(ICC2/PI489777)SNP_12923 | 232  | C | T | 15 | 9  | --   | --           |
|            | Ca(ICC2/PI489777)SNP_12924 | 1213 | C | T | 13 | 16 | --   | --           |
| CakTC38586 | Ca(ICC2/PI489777)SNP_12925 | 737  | T | G | 14 | 12 | --   | --           |
|            | Ca(ICC2/PI489777)SNP_12926 | 745  | C | T | 15 | 11 | --   | --           |
|            | Ca(ICC2/PI489777)SNP_12927 | 750  | G | T | 16 | 10 | --   | --           |
|            | Ca(ICC2/PI489777)SNP_12928 | 1104 | A | G | 8  | 6  | --   | --           |
| CakTC26451 | Ca(ICC2/PI489777)SNP_12929 | 411  | T | C | 3  | 4  | --   | --           |
| CakTC28999 | Ca(ICC2/PI489777)SNP_12930 | 770  | T | C | 4  | 4  | --   | --           |
| CakTC23541 | Ca(ICC2/PI489777)SNP_12931 | 80   | C | T | 9  | 4  | --   | Pseudo_ARR-B |
|            | Ca(ICC2/PI489777)SNP_12932 | 1368 | A | G | 11 | 5  | --   | Pseudo_ARR-B |
|            | Ca(ICC2/PI489777)SNP_12933 | 1405 | A | G | 11 | 4  | --   | Pseudo_ARR-B |
|            | Ca(ICC2/PI489777)SNP_12934 | 1962 | T | C | 42 | 17 | --   | Pseudo_ARR-B |
|            | Ca(ICC2/PI489777)SNP_12935 | 2174 | A | G | 28 | 13 | --   | Pseudo_ARR-B |
|            | Ca(ICC2/PI489777)SNP_12936 | 2223 | C | G | 36 | 16 | --   | Pseudo_ARR-B |
|            | Ca(ICC2/PI489777)SNP_12937 | 2290 | A | G | 29 | 15 | --   | Pseudo_ARR-B |
|            | Ca(ICC2/PI489777)SNP_12938 | 2698 | C | G | 20 | 10 | --   | Pseudo_ARR-B |
|            | Ca(ICC2/PI489777)SNP_12939 | 3707 | T | C | 11 | 5  | --   | Pseudo_ARR-B |
|            | Ca(ICC2/PI489777)SNP_12940 | 4041 | T | C | 8  | 5  | --   | Pseudo_ARR-B |
|            | Ca(ICC2/PI489777)SNP_12941 | 4239 | G | C | 7  | 3  | --   | Pseudo_ARR-B |
|            | Ca(ICC2/PI489777)SNP_12942 | 4409 | T | C | 6  | 5  | --   | Pseudo_ARR-B |
|            | Ca(ICC2/PI489777)SNP_12943 | 4473 | C | A | 8  | 4  | --   | Pseudo_ARR-B |
| CakTC26422 | Ca(ICC2/PI489777)SNP_12944 | 910  | G | A | 3  | 26 | --   | --           |
|            | Ca(ICC2/PI489777)SNP_12945 | 1453 | C | T | 12 | 21 | --   | --           |

|            |                            |      |   |   |    |    |    |           |
|------------|----------------------------|------|---|---|----|----|----|-----------|
|            | Ca(ICC2/PI489777)SNP_12946 | 1620 | C | G | 5  | 15 | -- | --        |
| CakTC25354 | Ca(ICC2/PI489777)SNP_12947 | 310  | G | A | 24 | 18 | -- | CCAAT     |
|            | Ca(ICC2/PI489777)SNP_12948 | 550  | G | A | 33 | 9  | -- | CCAAT     |
| CakTC35240 | Ca(ICC2/PI489777)SNP_12949 | 76   | C | A | 5  | 6  | -- | --        |
|            | Ca(ICC2/PI489777)SNP_12950 | 221  | G | A | 15 | 7  | -- | --        |
|            | Ca(ICC2/PI489777)SNP_12951 | 668  | G | A | 15 | 17 | -- | --        |
|            | Ca(ICC2/PI489777)SNP_12952 | 726  | A | C | 13 | 17 | -- | --        |
|            | Ca(ICC2/PI489777)SNP_12953 | 805  | A | T | 19 | 18 | -- | --        |
|            | Ca(ICC2/PI489777)SNP_12954 | 809  | G | A | 19 | 19 | -- | --        |
|            | Ca(ICC2/PI489777)SNP_12955 | 1010 | A | G | 26 | 19 | -- | --        |
|            | Ca(ICC2/PI489777)SNP_12956 | 1114 | G | A | 23 | 19 | -- | --        |
|            | Ca(ICC2/PI489777)SNP_12957 | 1424 | A | G | 26 | 25 | -- | --        |
|            | Ca(ICC2/PI489777)SNP_12958 | 1479 | G | A | 20 | 28 | -- | --        |
|            | Ca(ICC2/PI489777)SNP_12959 | 1540 | G | A | 17 | 27 | -- | --        |
|            | Ca(ICC2/PI489777)SNP_12960 | 1604 | T | C | 33 | 26 | -- | --        |
|            | Ca(ICC2/PI489777)SNP_12961 | 1768 | C | T | 35 | 26 | -- | --        |
|            | Ca(ICC2/PI489777)SNP_12962 | 2392 | T | C | 9  | 30 | -- | --        |
|            | Ca(ICC2/PI489777)SNP_12963 | 2407 | T | C | 10 | 30 | -- | --        |
|            | Ca(ICC2/PI489777)SNP_12964 | 2818 | C | T | 15 | 16 | -- | --        |
| CakTC31639 | Ca(ICC2/PI489777)SNP_12965 | 840  | T | C | 29 | 10 | -- | --        |
| CakTC33885 | Ca(ICC2/PI489777)SNP_12966 | 778  | G | A | 16 | 8  | -- | C2C2-GATA |
| CakTC23625 | Ca(ICC2/PI489777)SNP_12967 | 660  | A | T | 36 | 3  | -- | --        |
| CakTC40704 | Ca(ICC2/PI489777)SNP_12968 | 751  | A | T | 6  | 4  | -- | --        |
|            | Ca(ICC2/PI489777)SNP_12969 | 766  | G | A | 5  | 4  | -- | --        |
|            | Ca(ICC2/PI489777)SNP_12970 | 824  | G | T | 4  | 4  | -- | --        |
| CakTC22746 | Ca(ICC2/PI489777)SNP_12971 | 366  | G | A | 10 | 11 | -- | --        |
| CakTC32064 | Ca(ICC2/PI489777)SNP_12972 | 406  | A | G | 36 | 34 | -- | --        |
| CakTC31512 | Ca(ICC2/PI489777)SNP_12973 | 583  | A | G | 7  | 11 | -- | --        |
| CakTC43217 | Ca(ICC2/PI489777)SNP_12974 | 655  | T | C | 16 | 6  | -- | --        |
|            | Ca(ICC2/PI489777)SNP_12975 | 694  | T | C | 19 | 6  | -- | --        |
| CakTC39403 | Ca(ICC2/PI489777)SNP_12976 | 631  | T | C | 3  | 4  | -- | --        |
|            | Ca(ICC2/PI489777)SNP_12977 | 709  | T | C | 3  | 4  | -- | --        |
|            | Ca(ICC2/PI489777)SNP_12978 | 737  | A | G | 4  | 6  | -- | --        |
|            | Ca(ICC2/PI489777)SNP_12979 | 742  | G | A | 5  | 6  | -- | --        |
|            | Ca(ICC2/PI489777)SNP_12980 | 1099 | A | G | 5  | 7  | -- | --        |
| CakTC39214 | Ca(ICC2/PI489777)SNP_12981 | 154  | A | T | 10 | 3  | -- | --        |
|            | Ca(ICC2/PI489777)SNP_12982 | 519  | G | T | 8  | 13 | -- | --        |
| CakTC32056 | Ca(ICC2/PI489777)SNP_12983 | 216  | C | A | 15 | 5  | -- | --        |
|            | Ca(ICC2/PI489777)SNP_12984 | 313  | C | T | 23 | 8  | -- | --        |
|            | Ca(ICC2/PI489777)SNP_12985 | 316  | C | T | 23 | 8  | -- | --        |
| CakTC10502 | Ca(ICC2/PI489777)SNP_12986 | 117  | G | T | 4  | 3  | -- | --        |
|            | Ca(ICC2/PI489777)SNP_12987 | 402  | T | C | 5  | 8  | -- | --        |
|            | Ca(ICC2/PI489777)SNP_12988 | 930  | G | A | 8  | 4  | -- | --        |
| CakTC41022 | Ca(ICC2/PI489777)SNP_12989 | 156  | G | T | 4  | 4  | -- | --        |
| CakTC42831 | Ca(ICC2/PI489777)SNP_12990 | 702  | G | T | 4  | 6  | -- | --        |
|            | Ca(ICC2/PI489777)SNP_12991 | 798  | G | A | 5  | 9  | -- | --        |
|            | Ca(ICC2/PI489777)SNP_12992 | 816  | G | A | 6  | 7  | -- | --        |
|            | Ca(ICC2/PI489777)SNP_12993 | 1074 | T | C | 7  | 7  | -- | --        |
|            | Ca(ICC2/PI489777)SNP_12994 | 1150 | A | G | 7  | 6  | -- | --        |
|            | Ca(ICC2/PI489777)SNP_12995 | 1162 | A | C | 7  | 6  | -- | --        |
|            | Ca(ICC2/PI489777)SNP_12996 | 1166 | C | T | 7  | 6  | -- | --        |
| CakTC23118 | Ca(ICC2/PI489777)SNP_12997 | 556  | C | T | 18 | 3  | -- | --        |
| CakTC26905 | Ca(ICC2/PI489777)SNP_12998 | 302  | G | A | 10 | 3  | -- | --        |
|            | Ca(ICC2/PI489777)SNP_12999 | 427  | C | A | 8  | 5  | -- | --        |
|            | Ca(ICC2/PI489777)SNP_13000 | 439  | A | C | 9  | 7  | -- | --        |
|            | Ca(ICC2/PI489777)SNP_13001 | 616  | G | A | 4  | 10 | -- | --        |
|            | Ca(ICC2/PI489777)SNP_13002 | 698  | C | T | 4  | 7  | -- | --        |
|            | Ca(ICC2/PI489777)SNP_13003 | 826  | C | G | 4  | 8  | -- | --        |
|            | Ca(ICC2/PI489777)SNP_13004 | 841  | G | T | 4  | 9  | -- | --        |
| CakTC09794 | Ca(ICC2/PI489777)SNP_13005 | 1217 | T | C | 9  | 7  | -- | --        |
|            | Ca(ICC2/PI489777)SNP_13006 | 2331 | G | T | 4  | 3  | -- | --        |
| CakTC14091 | Ca(ICC2/PI489777)SNP_13007 | 829  | A | G | 3  | 3  | -- | --        |
|            | Ca(ICC2/PI489777)SNP_13008 | 846  | A | G | 3  | 3  | -- | --        |
|            | Ca(ICC2/PI489777)SNP_13009 | 864  | C | T | 3  | 3  | -- | --        |
|            | Ca(ICC2/PI489777)SNP_13010 | 876  | T | A | 3  | 3  | -- | --        |
|            | Ca(ICC2/PI489777)SNP_13011 | 891  | G | T | 3  | 3  | -- | --        |
|            | Ca(ICC2/PI489777)SNP_13012 | 928  | G | C | 3  | 3  | -- | --        |
| CakTC36336 | Ca(ICC2/PI489777)SNP_13013 | 323  | A | G | 8  | 5  | -- | --        |
| CakTC09842 | Ca(ICC2/PI489777)SNP_13014 | 509  | A | G | 8  | 18 | -- | --        |
|            | Ca(ICC2/PI489777)SNP_13015 | 1477 | G | T | 10 | 4  | -- | --        |
| CakTC27114 | Ca(ICC2/PI489777)SNP_13016 | 651  | G | A | 35 | 18 | -- | --        |
|            | Ca(ICC2/PI489777)SNP_13017 | 741  | C | T | 20 | 17 | -- | --        |
|            | Ca(ICC2/PI489777)SNP_13018 | 801  | T | C | 16 | 12 | -- | --        |
|            | Ca(ICC2/PI489777)SNP_13019 | 906  | T | C | 13 | 5  | -- | --        |



|            |                            |      |   |   |    |    |           |     |
|------------|----------------------------|------|---|---|----|----|-----------|-----|
|            | Ca(ICC2/PI489777)SNP_13020 | 909  | G | A | 13 | 5  | --        | --  |
| CakTC38057 | Ca(ICC2/PI489777)SNP_13021 | 810  | T | C | 5  | 4  | --        | --  |
| CakTC33315 | Ca(ICC2/PI489777)SNP_13022 | 198  | A | G | 7  | 3  | --        | --  |
|            | Ca(ICC2/PI489777)SNP_13023 | 220  | T | C | 6  | 6  | --        | --  |
|            | Ca(ICC2/PI489777)SNP_13024 | 229  | T | A | 6  | 7  | --        | --  |
|            | Ca(ICC2/PI489777)SNP_13025 | 249  | C | A | 7  | 7  | --        | --  |
|            | Ca(ICC2/PI489777)SNP_13026 | 338  | C | T | 7  | 9  | --        | --  |
|            | Ca(ICC2/PI489777)SNP_13027 | 488  | C | G | 9  | 9  | --        | --  |
|            | Ca(ICC2/PI489777)SNP_13028 | 551  | G | C | 5  | 8  | --        | --  |
|            | Ca(ICC2/PI489777)SNP_13029 | 600  | T | G | 6  | 10 | --        | --  |
| CakTC30200 | Ca(ICC2/PI489777)SNP_13030 | 386  | T | C | 7  | 12 | --        | --  |
|            | Ca(ICC2/PI489777)SNP_13031 | 551  | G | A | 6  | 13 | --        | --  |
|            | Ca(ICC2/PI489777)SNP_13032 | 991  | C | T | 5  | 8  | --        | --  |
|            | Ca(ICC2/PI489777)SNP_13033 | 2202 | G | A | 11 | 6  | --        | --  |
| CakTC12246 | Ca(ICC2/PI489777)SNP_13034 | 249  | A | G | 5  | 4  | Young_pod | --  |
|            | Ca(ICC2/PI489777)SNP_13035 | 361  | A | G | 5  | 3  | Young_pod | --  |
| CakTC33971 | Ca(ICC2/PI489777)SNP_13036 | 882  | A | G | 20 | 9  | --        | --  |
|            | Ca(ICC2/PI489777)SNP_13037 | 966  | G | A | 25 | 12 | --        | --  |
|            | Ca(ICC2/PI489777)SNP_13038 | 1674 | G | A | 31 | 11 | --        | --  |
|            | Ca(ICC2/PI489777)SNP_13039 | 1686 | T | C | 30 | 11 | --        | --  |
|            | Ca(ICC2/PI489777)SNP_13040 | 1784 | C | A | 26 | 11 | --        | --  |
| CakTC39142 | Ca(ICC2/PI489777)SNP_13041 | 314  | C | T | 9  | 5  | --        | --  |
|            | Ca(ICC2/PI489777)SNP_13042 | 800  | T | C | 10 | 5  | --        | --  |
|            | Ca(ICC2/PI489777)SNP_13043 | 1313 | A | G | 9  | 5  | --        | --  |
|            | Ca(ICC2/PI489777)SNP_13044 | 1319 | C | T | 8  | 5  | --        | --  |
| CakTC38528 | Ca(ICC2/PI489777)SNP_13045 | 416  | G | A | 13 | 9  | --        | --  |
| CakTC33978 | Ca(ICC2/PI489777)SNP_13046 | 650  | G | A | 39 | 14 | --        | --  |
|            | Ca(ICC2/PI489777)SNP_13047 | 669  | G | A | 40 | 13 | --        | --  |
|            | Ca(ICC2/PI489777)SNP_13048 | 812  | T | A | 39 | 16 | --        | --  |
|            | Ca(ICC2/PI489777)SNP_13049 | 1598 | A | G | 30 | 25 | --        | --  |
|            | Ca(ICC2/PI489777)SNP_13050 | 1937 | A | G | 31 | 13 | --        | --  |
|            | Ca(ICC2/PI489777)SNP_13051 | 2031 | A | G | 20 | 8  | --        | --  |
|            | Ca(ICC2/PI489777)SNP_13052 | 2085 | G | T | 12 | 4  | --        | --  |
| CakTC28089 | Ca(ICC2/PI489777)SNP_13053 | 1311 | T | A | 3  | 3  | --        | --  |
| CakTC23456 | Ca(ICC2/PI489777)SNP_13054 | 352  | T | A | 43 | 50 | --        | --  |
|            | Ca(ICC2/PI489777)SNP_13055 | 379  | T | C | 51 | 52 | --        | --  |
| CakTC35762 | Ca(ICC2/PI489777)SNP_13056 | 401  | A | C | 3  | 4  | --        | --  |
|            | Ca(ICC2/PI489777)SNP_13057 | 508  | A | G | 8  | 4  | --        | --  |
|            | Ca(ICC2/PI489777)SNP_13058 | 511  | G | A | 8  | 4  | --        | --  |
|            | Ca(ICC2/PI489777)SNP_13059 | 953  | A | G | 13 | 3  | --        | --  |
|            | Ca(ICC2/PI489777)SNP_13060 | 1611 | A | G | 20 | 15 | --        | --  |
|            | Ca(ICC2/PI489777)SNP_13061 | 1749 | C | T | 25 | 13 | --        | --  |
|            | Ca(ICC2/PI489777)SNP_13062 | 1776 | C | T | 25 | 12 | --        | --  |
|            | Ca(ICC2/PI489777)SNP_13063 | 1824 | C | T | 22 | 11 | --        | --  |
|            | Ca(ICC2/PI489777)SNP_13064 | 2103 | G | A | 19 | 6  | --        | --  |
|            | Ca(ICC2/PI489777)SNP_13065 | 2298 | G | A | 26 | 12 | --        | --  |
|            | Ca(ICC2/PI489777)SNP_13066 | 2493 | T | C | 26 | 12 | --        | --  |
|            | Ca(ICC2/PI489777)SNP_13067 | 2760 | C | T | 10 | 6  | --        | --  |
|            | Ca(ICC2/PI489777)SNP_13068 | 3003 | T | C | 10 | 9  | --        | --  |
|            | Ca(ICC2/PI489777)SNP_13069 | 3045 | C | T | 8  | 9  | --        | --  |
|            | Ca(ICC2/PI489777)SNP_13070 | 3162 | G | A | 5  | 4  | --        | --  |
| CakTC29897 | Ca(ICC2/PI489777)SNP_13071 | 541  | T | C | 6  | 4  | --        | --  |
|            | Ca(ICC2/PI489777)SNP_13072 | 597  | T | C | 5  | 4  | --        | --  |
|            | Ca(ICC2/PI489777)SNP_13073 | 648  | A | G | 6  | 4  | --        | --  |
|            | Ca(ICC2/PI489777)SNP_13074 | 815  | C | G | 7  | 5  | --        | --  |
|            | Ca(ICC2/PI489777)SNP_13075 | 962  | G | A | 9  | 4  | --        | --  |
|            | Ca(ICC2/PI489777)SNP_13076 | 1155 | G | A | 22 | 9  | --        | --  |
|            | Ca(ICC2/PI489777)SNP_13077 | 1467 | A | G | 16 | 11 | --        | --  |
|            | Ca(ICC2/PI489777)SNP_13078 | 1496 | A | G | 15 | 8  | --        | --  |
| CakTC29242 | Ca(ICC2/PI489777)SNP_13079 | 561  | C | T | 4  | 5  | --        | --  |
|            | Ca(ICC2/PI489777)SNP_13080 | 951  | C | T | 7  | 4  | --        | --  |
|            | Ca(ICC2/PI489777)SNP_13081 | 1248 | G | A | 28 | 5  | --        | --  |
|            | Ca(ICC2/PI489777)SNP_13082 | 1293 | C | T | 30 | 5  | --        | --  |
|            | Ca(ICC2/PI489777)SNP_13083 | 1380 | T | C | 30 | 10 | --        | --  |
|            | Ca(ICC2/PI489777)SNP_13084 | 1419 | T | C | 28 | 13 | --        | --  |
| CakTC10356 | Ca(ICC2/PI489777)SNP_13085 | 422  | T | G | 22 | 15 | --        | TPR |
|            | Ca(ICC2/PI489777)SNP_13086 | 434  | C | T | 22 | 17 | --        | TPR |
|            | Ca(ICC2/PI489777)SNP_13087 | 488  | T | C | 21 | 17 | --        | TPR |
|            | Ca(ICC2/PI489777)SNP_13088 | 683  | T | C | 12 | 7  | --        | TPR |
| CakTC33481 | Ca(ICC2/PI489777)SNP_13089 | 36   | T | A | 21 | 29 | --        | --  |
|            | Ca(ICC2/PI489777)SNP_13090 | 144  | A | G | 26 | 46 | --        | --  |
| CakTC10676 | Ca(ICC2/PI489777)SNP_13091 | 334  | G | A | 12 | 5  | --        | HB  |
|            | Ca(ICC2/PI489777)SNP_13092 | 363  | T | C | 12 | 5  | --        | HB  |
| CakTC25313 | Ca(ICC2/PI489777)SNP_13093 | 344  | T | C | 10 | 9  | --        | --  |

|            |                            |      |   |   |    |    |        |     |
|------------|----------------------------|------|---|---|----|----|--------|-----|
| CakTC38601 | Ca(ICC2/PI489777)SNP_13094 | 1223 | A | G | 36 | 22 | --     | --  |
|            | Ca(ICC2/PI489777)SNP_13095 | 1565 | A | C | 3  | 3  | --     | --  |
| CakTC38418 | Ca(ICC2/PI489777)SNP_13096 | 468  | C | A | 38 | 22 | --     | --  |
| CakTC24087 | Ca(ICC2/PI489777)SNP_13097 | 106  | A | T | 7  | 3  | Flower | bud |
|            | Ca(ICC2/PI489777)SNP_13098 | 135  | G | T | 7  | 4  | Flower | bud |
| CakTC39676 | Ca(ICC2/PI489777)SNP_13099 | 880  | G | C | 8  | 4  | Root   | --  |
|            | Ca(ICC2/PI489777)SNP_13100 | 1395 | A | G | 3  | 6  | Root   | --  |
|            | Ca(ICC2/PI489777)SNP_13101 | 1474 | T | G | 4  | 4  | Root   | --  |
| CakTC39931 | Ca(ICC2/PI489777)SNP_13102 | 815  | C | T | 3  | 5  | --     | --  |
|            | Ca(ICC2/PI489777)SNP_13103 | 843  | G | A | 3  | 5  | --     | --  |
|            | Ca(ICC2/PI489777)SNP_13104 | 879  | T | C | 3  | 3  | --     | --  |
|            | Ca(ICC2/PI489777)SNP_13105 | 1005 | G | A | 5  | 3  | --     | --  |
| CakTC22261 | Ca(ICC2/PI489777)SNP_13106 | 668  | G | A | 5  | 4  | --     | --  |
|            | Ca(ICC2/PI489777)SNP_13107 | 1805 | A | G | 5  | 5  | --     | --  |
|            | Ca(ICC2/PI489777)SNP_13108 | 2045 | T | G | 8  | 6  | --     | --  |
|            | Ca(ICC2/PI489777)SNP_13109 | 2084 | A | G | 8  | 5  | --     | --  |
|            | Ca(ICC2/PI489777)SNP_13110 | 3005 | C | T | 4  | 3  | --     | --  |
| CakTC40214 | Ca(ICC2/PI489777)SNP_13111 | 204  | A | G | 22 | 7  | --     | --  |
|            | Ca(ICC2/PI489777)SNP_13112 | 216  | C | A | 28 | 6  | --     | --  |
|            | Ca(ICC2/PI489777)SNP_13113 | 246  | A | G | 29 | 13 | --     | --  |
|            | Ca(ICC2/PI489777)SNP_13114 | 250  | C | A | 30 | 12 | --     | --  |
|            | Ca(ICC2/PI489777)SNP_13115 | 294  | C | T | 28 | 12 | --     | --  |
|            | Ca(ICC2/PI489777)SNP_13116 | 309  | T | A | 33 | 14 | --     | --  |
|            | Ca(ICC2/PI489777)SNP_13117 | 740  | G | A | 78 | 36 | --     | --  |
|            | Ca(ICC2/PI489777)SNP_13118 | 782  | C | G | 89 | 37 | --     | --  |
|            | Ca(ICC2/PI489777)SNP_13119 | 1865 | G | T | 8  | 6  | --     | --  |
|            | Ca(ICC2/PI489777)SNP_13120 | 1913 | T | A | 7  | 4  | --     | --  |
|            | Ca(ICC2/PI489777)SNP_13121 | 2129 | G | A | 12 | 6  | --     | --  |
|            | Ca(ICC2/PI489777)SNP_13122 | 2282 | T | C | 9  | 3  | --     | --  |
| CakTC33538 | Ca(ICC2/PI489777)SNP_13123 | 324  | A | G | 4  | 3  | --     | --  |
| CakTC13185 | Ca(ICC2/PI489777)SNP_13124 | 241  | A | T | 43 | 6  | --     | --  |
| CakTC20793 | Ca(ICC2/PI489777)SNP_13125 | 270  | G | C | 10 | 7  | --     | --  |
|            | Ca(ICC2/PI489777)SNP_13126 | 2281 | A | G | 11 | 4  | --     | --  |
| CakTC23982 | Ca(ICC2/PI489777)SNP_13127 | 1273 | G | A | 25 | 20 | --     | --  |
| CakTC34404 | Ca(ICC2/PI489777)SNP_13128 | 132  | C | T | 9  | 4  | --     | --  |
|            | Ca(ICC2/PI489777)SNP_13129 | 212  | G | C | 17 | 13 | --     | --  |
|            | Ca(ICC2/PI489777)SNP_13130 | 510  | C | T | 17 | 13 | --     | --  |
| CakTC30010 | Ca(ICC2/PI489777)SNP_13131 | 717  | C | T | 7  | 3  | --     | --  |
|            | Ca(ICC2/PI489777)SNP_13132 | 1017 | C | T | 5  | 4  | --     | --  |
|            | Ca(ICC2/PI489777)SNP_13133 | 1095 | G | A | 4  | 4  | --     | --  |
|            | Ca(ICC2/PI489777)SNP_13134 | 1215 | A | G | 6  | 4  | --     | --  |
| CakTC42172 | Ca(ICC2/PI489777)SNP_13135 | 257  | C | G | 12 | 3  | --     | --  |
|            | Ca(ICC2/PI489777)SNP_13136 | 598  | A | T | 12 | 7  | --     | --  |
|            | Ca(ICC2/PI489777)SNP_13137 | 655  | T | A | 12 | 7  | --     | --  |
|            | Ca(ICC2/PI489777)SNP_13138 | 667  | T | C | 14 | 6  | --     | --  |
|            | Ca(ICC2/PI489777)SNP_13139 | 727  | A | T | 12 | 6  | --     | --  |
|            | Ca(ICC2/PI489777)SNP_13140 | 809  | G | A | 16 | 4  | --     | --  |
|            | Ca(ICC2/PI489777)SNP_13141 | 856  | C | A | 10 | 3  | --     | --  |
|            | Ca(ICC2/PI489777)SNP_13142 | 1339 | C | T | 22 | 6  | --     | --  |
|            | Ca(ICC2/PI489777)SNP_13143 | 1379 | C | G | 22 | 5  | --     | --  |
|            | Ca(ICC2/PI489777)SNP_13144 | 1459 | A | G | 19 | 3  | --     | --  |
|            | Ca(ICC2/PI489777)SNP_13145 | 1705 | A | G | 14 | 3  | --     | --  |
| CakTC39396 | Ca(ICC2/PI489777)SNP_13146 | 1193 | C | A | 7  | 5  | --     | --  |
|            | Ca(ICC2/PI489777)SNP_13147 | 1273 | A | C | 7  | 5  | --     | --  |
| CakTC26369 | Ca(ICC2/PI489777)SNP_13148 | 168  | T | A | 3  | 3  | --     | --  |
|            | Ca(ICC2/PI489777)SNP_13149 | 1185 | C | T | 4  | 11 | --     | --  |
| CakTC33150 | Ca(ICC2/PI489777)SNP_13150 | 1267 | C | T | 13 | 4  | --     | --  |
| CakTC24683 | Ca(ICC2/PI489777)SNP_13151 | 249  | A | G | 3  | 4  | --     | --  |
| CakTC27836 | Ca(ICC2/PI489777)SNP_13152 | 2184 | G | A | 12 | 6  | --     | --  |
|            | Ca(ICC2/PI489777)SNP_13153 | 2481 | G | A | 9  | 9  | --     | --  |
| CakTC39501 | Ca(ICC2/PI489777)SNP_13154 | 196  | A | G | 26 | 27 | --     | --  |
| CakTC43186 | Ca(ICC2/PI489777)SNP_13155 | 223  | C | T | 34 | 14 | --     | --  |
|            | Ca(ICC2/PI489777)SNP_13156 | 296  | C | T | 37 | 12 | --     | --  |
| CakTC29659 | Ca(ICC2/PI489777)SNP_13157 | 388  | G | T | 3  | 3  | --     | --  |
|            | Ca(ICC2/PI489777)SNP_13158 | 523  | A | G | 3  | 3  | --     | --  |
|            | Ca(ICC2/PI489777)SNP_13159 | 528  | G | A | 3  | 3  | --     | --  |
| CakTC25369 | Ca(ICC2/PI489777)SNP_13160 | 666  | T | C | 5  | 3  | --     | --  |
|            | Ca(ICC2/PI489777)SNP_13161 | 1307 | G | T | 14 | 20 | --     | --  |
| CakTC38473 | Ca(ICC2/PI489777)SNP_13162 | 105  | G | C | 8  | 5  | --     | --  |
|            | Ca(ICC2/PI489777)SNP_13163 | 279  | T | C | 18 | 19 | --     | --  |
|            | Ca(ICC2/PI489777)SNP_13164 | 592  | T | C | 32 | 22 | --     | --  |
|            | Ca(ICC2/PI489777)SNP_13165 | 616  | T | C | 38 | 21 | --     | --  |
|            | Ca(ICC2/PI489777)SNP_13166 | 646  | C | T | 39 | 25 | --     | --  |
|            | Ca(ICC2/PI489777)SNP_13167 | 1198 | G | A | 46 | 49 | --     | --  |

|            |                            |      |   |   |     |     |       |    |
|------------|----------------------------|------|---|---|-----|-----|-------|----|
|            | Ca(ICC2/PI489777)SNP_13168 | 1303 | G | A | 47  | 44  | --    | -- |
|            | Ca(ICC2/PI489777)SNP_13169 | 1409 | T | A | 33  | 40  | --    | -- |
|            | Ca(ICC2/PI489777)SNP_13170 | 1489 | A | G | 33  | 31  | --    | -- |
|            | Ca(ICC2/PI489777)SNP_13171 | 1531 | C | T | 30  | 26  | --    | -- |
|            | Ca(ICC2/PI489777)SNP_13172 | 1585 | G | C | 22  | 22  | --    | -- |
| CakTC33206 | Ca(ICC2/PI489777)SNP_13173 | 561  | T | G | 37  | 25  | --    | -- |
|            | Ca(ICC2/PI489777)SNP_13174 | 1507 | G | A | 14  | 17  | --    | -- |
| CakTC32979 | Ca(ICC2/PI489777)SNP_13175 | 65   | T | A | 4   | 3   | --    | -- |
|            | Ca(ICC2/PI489777)SNP_13176 | 516  | T | G | 9   | 7   | --    | -- |
| CakTC41106 | Ca(ICC2/PI489777)SNP_13177 | 1069 | C | G | 10  | 7   | --    | -- |
|            | Ca(ICC2/PI489777)SNP_13178 | 2070 | T | C | 9   | 5   | --    | -- |
| CakTC28054 | Ca(ICC2/PI489777)SNP_13179 | 1236 | A | G | 25  | 9   | --    | -- |
|            | Ca(ICC2/PI489777)SNP_13180 | 1566 | T | C | 17  | 8   | --    | -- |
| CakTC23053 | Ca(ICC2/PI489777)SNP_13181 | 374  | T | C | 208 | 141 | --    | -- |
| CakTC39765 | Ca(ICC2/PI489777)SNP_13182 | 258  | C | A | 31  | 29  | --    | -- |
|            | Ca(ICC2/PI489777)SNP_13183 | 480  | T | C | 39  | 35  | --    | -- |
|            | Ca(ICC2/PI489777)SNP_13184 | 1317 | T | C | 46  | 20  | --    | -- |
| CakTC20155 | Ca(ICC2/PI489777)SNP_13185 | 108  | C | G | 11  | 3   | --    | -- |
|            | Ca(ICC2/PI489777)SNP_13186 | 262  | G | A | 32  | 14  | --    | -- |
|            | Ca(ICC2/PI489777)SNP_13187 | 800  | C | A | 30  | 5   | --    | -- |
| CakTC41649 | Ca(ICC2/PI489777)SNP_13188 | 471  | T | C | 3   | 5   | Shoot | -- |
|            | Ca(ICC2/PI489777)SNP_13189 | 595  | T | G | 8   | 8   | Shoot | -- |
|            | Ca(ICC2/PI489777)SNP_13190 | 625  | G | T | 8   | 8   | Shoot | -- |
|            | Ca(ICC2/PI489777)SNP_13191 | 967  | C | T | 9   | 8   | Shoot | -- |
|            | Ca(ICC2/PI489777)SNP_13192 | 970  | C | T | 8   | 8   | Shoot | -- |
|            | Ca(ICC2/PI489777)SNP_13193 | 1039 | T | C | 9   | 11  | Shoot | -- |
|            | Ca(ICC2/PI489777)SNP_13194 | 1201 | C | A | 15  | 9   | Shoot | -- |
|            | Ca(ICC2/PI489777)SNP_13195 | 1427 | T | C | 8   | 3   | Shoot | -- |
|            | Ca(ICC2/PI489777)SNP_13196 | 1497 | G | A | 10  | 3   | Shoot | -- |
|            | Ca(ICC2/PI489777)SNP_13197 | 1502 | A | G | 13  | 3   | Shoot | -- |
|            | Ca(ICC2/PI489777)SNP_13198 | 1775 | A | G | 15  | 14  | Shoot | -- |
|            | Ca(ICC2/PI489777)SNP_13199 | 1851 | G | A | 14  | 9   | Shoot | -- |
|            | Ca(ICC2/PI489777)SNP_13200 | 1947 | A | G | 14  | 10  | Shoot | -- |
|            | Ca(ICC2/PI489777)SNP_13201 | 1962 | T | A | 14  | 8   | Shoot | -- |
|            | Ca(ICC2/PI489777)SNP_13202 | 2102 | A | T | 8   | 6   | Shoot | -- |
| CakTC27318 | Ca(ICC2/PI489777)SNP_13203 | 159  | A | G | 9   | 6   | Shoot | -- |
|            | Ca(ICC2/PI489777)SNP_13204 | 520  | G | T | 10  | 3   | Shoot | -- |
|            | Ca(ICC2/PI489777)SNP_13205 | 750  | T | C | 6   | 4   | Shoot | -- |
|            | Ca(ICC2/PI489777)SNP_13206 | 804  | G | T | 5   | 4   | Shoot | -- |
|            | Ca(ICC2/PI489777)SNP_13207 | 837  | C | T | 5   | 4   | Shoot | -- |
| CakTC30745 | Ca(ICC2/PI489777)SNP_13208 | 829  | G | T | 36  | 13  | --    | -- |
| CakTC43310 | Ca(ICC2/PI489777)SNP_13209 | 326  | T | G | 9   | 28  | --    | -- |
|            | Ca(ICC2/PI489777)SNP_13210 | 509  | G | T | 8   | 31  | --    | -- |
| CakTC28103 | Ca(ICC2/PI489777)SNP_13211 | 106  | T | C | 4   | 6   | --    | -- |
|            | Ca(ICC2/PI489777)SNP_13212 | 171  | G | A | 6   | 6   | --    | -- |
|            | Ca(ICC2/PI489777)SNP_13213 | 1377 | T | C | 61  | 47  | --    | -- |
|            | Ca(ICC2/PI489777)SNP_13214 | 1437 | G | A | 63  | 42  | --    | -- |
|            | Ca(ICC2/PI489777)SNP_13215 | 2709 | C | A | 39  | 23  | --    | -- |
|            | Ca(ICC2/PI489777)SNP_13216 | 3426 | C | G | 53  | 24  | --    | -- |
|            | Ca(ICC2/PI489777)SNP_13217 | 3636 | A | G | 57  | 23  | --    | -- |
|            | Ca(ICC2/PI489777)SNP_13218 | 3711 | C | T | 47  | 18  | --    | -- |
|            | Ca(ICC2/PI489777)SNP_13219 | 3795 | A | T | 60  | 21  | --    | -- |
|            | Ca(ICC2/PI489777)SNP_13220 | 3828 | C | T | 43  | 18  | --    | -- |
|            | Ca(ICC2/PI489777)SNP_13221 | 4158 | A | G | 20  | 15  | --    | -- |
|            | Ca(ICC2/PI489777)SNP_13222 | 5297 | G | T | 26  | 19  | --    | -- |
| CakTC38480 | Ca(ICC2/PI489777)SNP_13223 | 305  | C | T | 36  | 16  | --    | -- |
|            | Ca(ICC2/PI489777)SNP_13224 | 1021 | T | A | 12  | 13  | --    | -- |
| CakTC30116 | Ca(ICC2/PI489777)SNP_13225 | 273  | A | G | 10  | 6   | --    | -- |
|            | Ca(ICC2/PI489777)SNP_13226 | 710  | G | A | 9   | 3   | --    | -- |
|            | Ca(ICC2/PI489777)SNP_13227 | 1584 | T | A | 15  | 4   | --    | -- |
|            | Ca(ICC2/PI489777)SNP_13228 | 1784 | C | T | 7   | 4   | --    | -- |
|            | Ca(ICC2/PI489777)SNP_13229 | 1880 | G | A | 4   | 3   | --    | -- |
| CakTC40154 | Ca(ICC2/PI489777)SNP_13230 | 529  | G | C | 15  | 7   | --    | -- |
|            | Ca(ICC2/PI489777)SNP_13231 | 639  | C | T | 14  | 9   | --    | -- |
|            | Ca(ICC2/PI489777)SNP_13232 | 726  | G | A | 15  | 10  | --    | -- |
|            | Ca(ICC2/PI489777)SNP_13233 | 834  | C | T | 12  | 10  | --    | -- |
|            | Ca(ICC2/PI489777)SNP_13234 | 843  | A | G | 15  | 10  | --    | -- |
|            | Ca(ICC2/PI489777)SNP_13235 | 940  | C | A | 15  | 13  | --    | -- |
|            | Ca(ICC2/PI489777)SNP_13236 | 963  | C | T | 13  | 13  | --    | -- |
| CakTC26049 | Ca(ICC2/PI489777)SNP_13237 | 244  | C | G | 8   | 4   | --    | -- |
|            | Ca(ICC2/PI489777)SNP_13238 | 539  | C | T | 21  | 7   | --    | -- |
|            | Ca(ICC2/PI489777)SNP_13239 | 3042 | C | T | 14  | 6   | --    | -- |
|            | Ca(ICC2/PI489777)SNP_13240 | 3199 | A | G | 11  | 7   | --    | -- |
|            | Ca(ICC2/PI489777)SNP_13241 | 3277 | T | C | 16  | 6   | --    | -- |

|            |                             |      |   |   |    |    |        |            |
|------------|-----------------------------|------|---|---|----|----|--------|------------|
| CakTC37242 | Ca(ICCV2/PI489777)SNP_13242 | 39   | A | C | 11 | 7  | --     | --         |
|            | Ca(ICCV2/PI489777)SNP_13243 | 170  | A | T | 13 | 13 | --     | --         |
|            | Ca(ICCV2/PI489777)SNP_13244 | 196  | G | C | 14 | 15 | --     | --         |
|            | Ca(ICCV2/PI489777)SNP_13245 | 236  | T | A | 16 | 19 | --     | --         |
| CakTC09924 | Ca(ICCV2/PI489777)SNP_13246 | 1346 | C | T | 3  | 4  | --     | TPR        |
| CakTC41046 | Ca(ICCV2/PI489777)SNP_13247 | 276  | G | T | 13 | 7  | --     | --         |
|            | Ca(ICCV2/PI489777)SNP_13248 | 308  | T | G | 12 | 8  | --     | --         |
|            | Ca(ICCV2/PI489777)SNP_13249 | 310  | A | T | 12 | 7  | --     | --         |
|            | Ca(ICCV2/PI489777)SNP_13250 | 561  | A | C | 21 | 5  | --     | --         |
| CakTC35631 | Ca(ICCV2/PI489777)SNP_13251 | 1066 | C | A | 5  | 3  | --     | --         |
| CakTC42776 | Ca(ICCV2/PI489777)SNP_13252 | 323  | A | G | 42 | 14 | --     | --         |
|            | Ca(ICCV2/PI489777)SNP_13253 | 395  | G | A | 44 | 15 | --     | --         |
|            | Ca(ICCV2/PI489777)SNP_13254 | 604  | C | T | 33 | 13 | --     | --         |
| CakTC37567 | Ca(ICCV2/PI489777)SNP_13255 | 56   | T | A | 7  | 9  | --     | --         |
|            | Ca(ICCV2/PI489777)SNP_13256 | 87   | A | T | 6  | 8  | --     | --         |
|            | Ca(ICCV2/PI489777)SNP_13257 | 97   | C | T | 7  | 7  | --     | --         |
|            | Ca(ICCV2/PI489777)SNP_13258 | 582  | A | G | 16 | 26 | --     | --         |
|            | Ca(ICCV2/PI489777)SNP_13259 | 1124 | C | T | 20 | 26 | --     | --         |
| CakTC30554 | Ca(ICCV2/PI489777)SNP_13260 | 609  | A | C | 4  | 3  | --     | --         |
| CakTC39817 | Ca(ICCV2/PI489777)SNP_13261 | 42   | T | A | 3  | 5  | --     | --         |
|            | Ca(ICCV2/PI489777)SNP_13262 | 59   | G | A | 8  | 6  | --     | --         |
|            | Ca(ICCV2/PI489777)SNP_13263 | 87   | T | G | 16 | 6  | --     | --         |
|            | Ca(ICCV2/PI489777)SNP_13264 | 418  | A | G | 35 | 16 | --     | --         |
|            | Ca(ICCV2/PI489777)SNP_13265 | 532  | G | A | 29 | 17 | --     | --         |
|            | Ca(ICCV2/PI489777)SNP_13266 | 616  | C | A | 30 | 10 | --     | --         |
|            | Ca(ICCV2/PI489777)SNP_13267 | 763  | C | T | 17 | 6  | --     | --         |
| CakTC41378 | Ca(ICCV2/PI489777)SNP_13268 | 2555 | A | G | 3  | 3  | --     | --         |
| CakTC31468 | Ca(ICCV2/PI489777)SNP_13269 | 401  | T | C | 30 | 7  | --     | --         |
|            | Ca(ICCV2/PI489777)SNP_13270 | 827  | T | C | 10 | 7  | --     | --         |
|            | Ca(ICCV2/PI489777)SNP_13271 | 1091 | C | T | 9  | 11 | --     | --         |
|            | Ca(ICCV2/PI489777)SNP_13272 | 1133 | G | A | 12 | 13 | --     | --         |
|            | Ca(ICCV2/PI489777)SNP_13273 | 1466 | A | G | 27 | 12 | --     | --         |
|            | Ca(ICCV2/PI489777)SNP_13274 | 1535 | T | A | 31 | 10 | --     | --         |
|            | Ca(ICCV2/PI489777)SNP_13275 | 2195 | T | C | 5  | 4  | --     | --         |
| CakTC40812 | Ca(ICCV2/PI489777)SNP_13276 | 625  | T | C | 3  | 16 | --     | --         |
| CakTC30935 | Ca(ICCV2/PI489777)SNP_13277 | 4475 | T | C | 7  | 3  | --     | Alfin-like |
| CakTC27242 | Ca(ICCV2/PI489777)SNP_13278 | 874  | A | G | 27 | 4  | --     | --         |
|            | Ca(ICCV2/PI489777)SNP_13279 | 1603 | A | G | 3  | 7  | --     | --         |
|            | Ca(ICCV2/PI489777)SNP_13280 | 1637 | C | T | 4  | 9  | --     | --         |
|            | Ca(ICCV2/PI489777)SNP_13281 | 1696 | A | G | 4  | 9  | --     | --         |
|            | Ca(ICCV2/PI489777)SNP_13282 | 1698 | G | C | 4  | 9  | --     | --         |
| CakTC27310 | Ca(ICCV2/PI489777)SNP_13283 | 56   | G | A | 6  | 3  | --     | --         |
|            | Ca(ICCV2/PI489777)SNP_13284 | 269  | C | T | 26 | 13 | --     | --         |
|            | Ca(ICCV2/PI489777)SNP_13285 | 1217 | G | A | 10 | 12 | --     | --         |
|            | Ca(ICCV2/PI489777)SNP_13286 | 1457 | G | A | 4  | 5  | --     | --         |
|            | Ca(ICCV2/PI489777)SNP_13287 | 1463 | A | G | 4  | 5  | --     | --         |
| CakTC24804 | Ca(ICCV2/PI489777)SNP_13288 | 737  | C | G | 70 | 3  | --     | --         |
| CakTC36193 | Ca(ICCV2/PI489777)SNP_13289 | 156  | A | G | 3  | 5  | --     | --         |
|            | Ca(ICCV2/PI489777)SNP_13290 | 449  | G | A | 4  | 5  | --     | --         |
| CakTC28122 | Ca(ICCV2/PI489777)SNP_13291 | 637  | T | C | 3  | 4  | --     | --         |
|            | Ca(ICCV2/PI489777)SNP_13292 | 976  | C | T | 6  | 4  | --     | --         |
| CakTC30267 | Ca(ICCV2/PI489777)SNP_13293 | 1082 | A | G | 4  | 4  | Flower | bud        |
| CakTC24982 | Ca(ICCV2/PI489777)SNP_13294 | 1893 | C | T | 34 | 9  | --     | --         |
|            | Ca(ICCV2/PI489777)SNP_13295 | 1929 | C | T | 41 | 10 | --     | --         |
|            | Ca(ICCV2/PI489777)SNP_13296 | 1992 | A | G | 32 | 12 | --     | --         |
|            | Ca(ICCV2/PI489777)SNP_13297 | 2362 | T | C | 26 | 9  | --     | --         |
| CakTC31745 | Ca(ICCV2/PI489777)SNP_13298 | 1054 | C | T | 7  | 6  | --     | FAR1       |
| CakTC39238 | Ca(ICCV2/PI489777)SNP_13299 | 1509 | C | T | 4  | 10 | --     | --         |
| CakTC37963 | Ca(ICCV2/PI489777)SNP_13300 | 232  | A | G | 6  | 3  | --     | --         |
| CakTC28915 | Ca(ICCV2/PI489777)SNP_13301 | 599  | A | G | 54 | 26 | --     | --         |
| CakTC22893 | Ca(ICCV2/PI489777)SNP_13302 | 223  | G | A | 15 | 10 | --     | --         |
|            | Ca(ICCV2/PI489777)SNP_13303 | 709  | T | A | 10 | 9  | --     | --         |
|            | Ca(ICCV2/PI489777)SNP_13304 | 778  | A | T | 6  | 8  | --     | --         |
|            | Ca(ICCV2/PI489777)SNP_13305 | 1054 | T | C | 7  | 12 | --     | --         |
|            | Ca(ICCV2/PI489777)SNP_13306 | 1184 | T | C | 5  | 6  | --     | --         |
| CakTC36961 | Ca(ICCV2/PI489777)SNP_13307 | 1588 | C | T | 7  | 9  | --     | --         |
| CakTC42460 | Ca(ICCV2/PI489777)SNP_13308 | 988  | G | T | 13 | 4  | --     | --         |
|            | Ca(ICCV2/PI489777)SNP_13309 | 1108 | T | C | 15 | 4  | --     | --         |
| CakTC41393 | Ca(ICCV2/PI489777)SNP_13310 | 101  | T | C | 7  | 7  | --     | --         |
|            | Ca(ICCV2/PI489777)SNP_13311 | 126  | C | T | 7  | 7  | --     | --         |
|            | Ca(ICCV2/PI489777)SNP_13312 | 154  | T | C | 6  | 7  | --     | --         |
|            | Ca(ICCV2/PI489777)SNP_13313 | 1337 | A | T | 4  | 8  | --     | --         |
|            | Ca(ICCV2/PI489777)SNP_13314 | 1903 | G | A | 11 | 7  | --     | --         |
|            | Ca(ICCV2/PI489777)SNP_13315 | 1992 | T | C | 10 | 4  | --     | --         |

|            |                            |      |   |   |    |    |           |         |
|------------|----------------------------|------|---|---|----|----|-----------|---------|
|            | Ca(ICC2/PI489777)SNP_13316 | 2188 | C | A | 6  | 4  | --        | --      |
| CakTC32120 | Ca(ICC2/PI489777)SNP_13317 | 325  | A | C | 8  | 3  | --        | --      |
|            | Ca(ICC2/PI489777)SNP_13318 | 835  | C | T | 14 | 7  | --        | --      |
|            | Ca(ICC2/PI489777)SNP_13319 | 1438 | T | A | 7  | 3  | --        | --      |
| CakTC28446 | Ca(ICC2/PI489777)SNP_13320 | 300  | G | A | 8  | 7  | --        | --      |
|            | Ca(ICC2/PI489777)SNP_13321 | 357  | T | A | 15 | 7  | --        | --      |
|            | Ca(ICC2/PI489777)SNP_13322 | 831  | A | G | 25 | 8  | --        | --      |
|            | Ca(ICC2/PI489777)SNP_13323 | 1023 | T | A | 22 | 3  | --        | --      |
|            | Ca(ICC2/PI489777)SNP_13324 | 1150 | A | G | 14 | 8  | --        | --      |
|            | Ca(ICC2/PI489777)SNP_13325 | 1569 | G | A | 5  | 4  | --        | --      |
| CakTC31223 | Ca(ICC2/PI489777)SNP_13326 | 76   | A | G | 12 | 33 | --        | --      |
|            | Ca(ICC2/PI489777)SNP_13327 | 93   | A | T | 10 | 34 | --        | --      |
| CakTC33727 | Ca(ICC2/PI489777)SNP_13328 | 1553 | C | T | 11 | 3  | --        | C3H     |
|            | Ca(ICC2/PI489777)SNP_13329 | 2491 | T | C | 18 | 3  | --        | C3H     |
| CakTC37869 | Ca(ICC2/PI489777)SNP_13330 | 172  | T | C | 3  | 5  | Shoot     | --      |
|            | Ca(ICC2/PI489777)SNP_13331 | 446  | C | A | 8  | 3  | Shoot     | --      |
| CakTC11458 | Ca(ICC2/PI489777)SNP_13332 | 1380 | T | C | 8  | 3  | --        | --      |
| CakTC38662 | Ca(ICC2/PI489777)SNP_13333 | 228  | T | C | 11 | 10 | --        | FHA     |
|            | Ca(ICC2/PI489777)SNP_13334 | 477  | G | T | 9  | 7  | --        | FHA     |
|            | Ca(ICC2/PI489777)SNP_13335 | 1351 | A | G | 20 | 11 | --        | FHA     |
| CakTC37195 | Ca(ICC2/PI489777)SNP_13336 | 184  | C | T | 11 | 33 | --        | --      |
|            | Ca(ICC2/PI489777)SNP_13337 | 195  | G | T | 11 | 34 | --        | --      |
|            | Ca(ICC2/PI489777)SNP_13338 | 928  | C | G | 11 | 6  | --        | --      |
|            | Ca(ICC2/PI489777)SNP_13339 | 963  | T | G | 11 | 6  | --        | --      |
| CakTC34862 | Ca(ICC2/PI489777)SNP_13340 | 612  | A | G | 3  | 3  | --        | --      |
| CakTC29924 | Ca(ICC2/PI489777)SNP_13341 | 1881 | A | G | 11 | 3  | Root      | --      |
|            | Ca(ICC2/PI489777)SNP_13342 | 2030 | C | T | 10 | 3  | Root      | --      |
| CakTC29802 | Ca(ICC2/PI489777)SNP_13343 | 593  | G | A | 13 | 16 | --        | --      |
|            | Ca(ICC2/PI489777)SNP_13344 | 878  | C | T | 10 | 5  | --        | --      |
| CakTC41947 | Ca(ICC2/PI489777)SNP_13345 | 239  | T | C | 7  | 5  | --        | --      |
|            | Ca(ICC2/PI489777)SNP_13346 | 345  | G | T | 9  | 6  | --        | --      |
|            | Ca(ICC2/PI489777)SNP_13347 | 352  | A | G | 8  | 7  | --        | --      |
| CakTC25249 | Ca(ICC2/PI489777)SNP_13348 | 1196 | A | C | 28 | 4  | --        | --      |
|            | Ca(ICC2/PI489777)SNP_13349 | 1250 | A | T | 25 | 4  | --        | --      |
| CakTC35725 | Ca(ICC2/PI489777)SNP_13350 | 42   | G | T | 17 | 9  | --        | --      |
|            | Ca(ICC2/PI489777)SNP_13351 | 132  | G | T | 22 | 15 | --        | --      |
|            | Ca(ICC2/PI489777)SNP_13352 | 557  | T | C | 39 | 19 | --        | --      |
|            | Ca(ICC2/PI489777)SNP_13353 | 1034 | G | T | 39 | 19 | --        | --      |
|            | Ca(ICC2/PI489777)SNP_13354 | 1166 | T | C | 38 | 19 | --        | --      |
|            | Ca(ICC2/PI489777)SNP_13355 | 1304 | T | G | 31 | 24 | --        | --      |
|            | Ca(ICC2/PI489777)SNP_13356 | 1887 | C | T | 49 | 13 | --        | --      |
|            | Ca(ICC2/PI489777)SNP_13357 | 2219 | T | C | 37 | 16 | --        | --      |
|            | Ca(ICC2/PI489777)SNP_13358 | 3506 | C | A | 22 | 13 | --        | --      |
| CakTC37768 | Ca(ICC2/PI489777)SNP_13359 | 120  | G | A | 3  | 4  | Young_pod | --      |
|            | Ca(ICC2/PI489777)SNP_13360 | 782  | C | A | 4  | 7  | Young_pod | --      |
|            | Ca(ICC2/PI489777)SNP_13361 | 817  | A | G | 3  | 8  | Young_pod | --      |
| CakTC38046 | Ca(ICC2/PI489777)SNP_13362 | 832  | G | A | 7  | 3  | --        | --      |
|            | Ca(ICC2/PI489777)SNP_13363 | 1110 | C | G | 3  | 6  | --        | --      |
|            | Ca(ICC2/PI489777)SNP_13364 | 1115 | T | C | 3  | 6  | --        | --      |
| CakTC41343 | Ca(ICC2/PI489777)SNP_13365 | 226  | C | T | 7  | 5  | --        | MYB     |
|            | Ca(ICC2/PI489777)SNP_13366 | 1696 | G | A | 13 | 7  | --        | MYB     |
|            | Ca(ICC2/PI489777)SNP_13367 | 2354 | T | C | 20 | 8  | --        | MYB     |
| CakTC28668 | Ca(ICC2/PI489777)SNP_13368 | 553  | G | A | 4  | 4  | --        | --      |
| CakTC33055 | Ca(ICC2/PI489777)SNP_13369 | 334  | G | A | 14 | 7  | --        | --      |
|            | Ca(ICC2/PI489777)SNP_13370 | 433  | C | T | 12 | 5  | --        | --      |
| CakTC40515 | Ca(ICC2/PI489777)SNP_13371 | 656  | T | C | 40 | 36 | --        | --      |
| CakTC32114 | Ca(ICC2/PI489777)SNP_13372 | 1259 | A | G | 5  | 6  | --        | --      |
| CakTC12287 | Ca(ICC2/PI489777)SNP_13373 | 614  | C | T | 5  | 4  | --        | --      |
| CakTC38824 | Ca(ICC2/PI489777)SNP_13374 | 930  | T | C | 31 | 8  | --        | --      |
|            | Ca(ICC2/PI489777)SNP_13375 | 1141 | C | T | 27 | 6  | --        | --      |
| CakTC41794 | Ca(ICC2/PI489777)SNP_13376 | 194  | T | C | 10 | 7  | Root      | --      |
|            | Ca(ICC2/PI489777)SNP_13377 | 718  | A | C | 8  | 16 | Root      | --      |
|            | Ca(ICC2/PI489777)SNP_13378 | 1770 | C | T | 6  | 6  | Root      | --      |
| CakTC35717 | Ca(ICC2/PI489777)SNP_13379 | 625  | C | T | 13 | 3  | --        | --      |
| CakTC24738 | Ca(ICC2/PI489777)SNP_13380 | 1255 | G | C | 9  | 3  | --        | --      |
|            | Ca(ICC2/PI489777)SNP_13381 | 1317 | C | T | 11 | 3  | --        | --      |
| CakTC38342 | Ca(ICC2/PI489777)SNP_13382 | 552  | G | A | 6  | 8  | --        | G2-like |
|            | Ca(ICC2/PI489777)SNP_13383 | 968  | A | G | 12 | 6  | --        | G2-like |
| CakTC13459 | Ca(ICC2/PI489777)SNP_13384 | 528  | G | A | 4  | 8  | --        | --      |
|            | Ca(ICC2/PI489777)SNP_13385 | 573  | A | T | 8  | 8  | --        | --      |
| CakTC27399 | Ca(ICC2/PI489777)SNP_13386 | 802  | T | C | 23 | 14 | --        | --      |
|            | Ca(ICC2/PI489777)SNP_13387 | 1555 | A | C | 25 | 9  | --        | --      |
|            | Ca(ICC2/PI489777)SNP_13388 | 2241 | T | C | 20 | 13 | --        | --      |
|            | Ca(ICC2/PI489777)SNP_13389 | 2279 | A | G | 18 | 13 | --        | --      |

|            |                            |      |   |   |     |    |        |     |
|------------|----------------------------|------|---|---|-----|----|--------|-----|
|            | Ca(ICC2/PI489777)SNP_13390 | 2348 | G | A | 15  | 14 | --     | --  |
|            | Ca(ICC2/PI489777)SNP_13391 | 2507 | C | A | 9   | 7  | --     | --  |
| CakTC32825 | Ca(ICC2/PI489777)SNP_13392 | 682  | T | A | 6   | 4  | --     | --  |
|            | Ca(ICC2/PI489777)SNP_13393 | 2122 | C | T | 7   | 6  | --     | --  |
|            | Ca(ICC2/PI489777)SNP_13394 | 2688 | T | C | 9   | 3  | --     | --  |
| CakTC10709 | Ca(ICC2/PI489777)SNP_13395 | 794  | G | A | 3   | 6  | --     | --  |
|            | Ca(ICC2/PI489777)SNP_13396 | 807  | T | G | 3   | 6  | --     | --  |
|            | Ca(ICC2/PI489777)SNP_13397 | 860  | T | C | 3   | 7  | --     | --  |
|            | Ca(ICC2/PI489777)SNP_13398 | 869  | T | G | 3   | 8  | --     | --  |
|            | Ca(ICC2/PI489777)SNP_13399 | 871  | G | C | 3   | 8  | --     | --  |
|            | Ca(ICC2/PI489777)SNP_13400 | 895  | A | G | 3   | 10 | --     | --  |
|            | Ca(ICC2/PI489777)SNP_13401 | 896  | C | T | 3   | 11 | --     | --  |
|            | Ca(ICC2/PI489777)SNP_13402 | 926  | T | C | 3   | 13 | --     | --  |
|            | Ca(ICC2/PI489777)SNP_13403 | 940  | A | T | 3   | 8  | --     | --  |
|            | Ca(ICC2/PI489777)SNP_13404 | 950  | T | C | 3   | 11 | --     | --  |
|            | Ca(ICC2/PI489777)SNP_13405 | 955  | T | C | 3   | 13 | --     | --  |
|            | Ca(ICC2/PI489777)SNP_13406 | 965  | T | C | 3   | 13 | --     | --  |
|            | Ca(ICC2/PI489777)SNP_13407 | 1960 | A | G | 3   | 9  | --     | --  |
| CakTC09756 | Ca(ICC2/PI489777)SNP_13408 | 183  | A | G | 6   | 5  | --     | --  |
|            | Ca(ICC2/PI489777)SNP_13409 | 221  | G | A | 7   | 10 | --     | --  |
|            | Ca(ICC2/PI489777)SNP_13410 | 416  | A | T | 8   | 9  | --     | --  |
|            | Ca(ICC2/PI489777)SNP_13411 | 425  | G | A | 8   | 9  | --     | --  |
|            | Ca(ICC2/PI489777)SNP_13412 | 1185 | G | C | 139 | 66 | --     | --  |
| CakTC09490 | Ca(ICC2/PI489777)SNP_13413 | 165  | A | T | 3   | 4  | --     | --  |
|            | Ca(ICC2/PI489777)SNP_13414 | 179  | A | T | 3   | 4  | --     | --  |
|            | Ca(ICC2/PI489777)SNP_13415 | 208  | A | G | 3   | 4  | --     | --  |
|            | Ca(ICC2/PI489777)SNP_13416 | 220  | T | A | 3   | 4  | --     | --  |
|            | Ca(ICC2/PI489777)SNP_13417 | 288  | T | C | 5   | 4  | --     | --  |
|            | Ca(ICC2/PI489777)SNP_13418 | 394  | C | T | 6   | 5  | --     | --  |
|            | Ca(ICC2/PI489777)SNP_13419 | 400  | A | T | 6   | 6  | --     | --  |
|            | Ca(ICC2/PI489777)SNP_13420 | 412  | A | G | 6   | 6  | --     | --  |
|            | Ca(ICC2/PI489777)SNP_13421 | 451  | G | A | 5   | 5  | --     | --  |
|            | Ca(ICC2/PI489777)SNP_13422 | 553  | G | A | 5   | 4  | --     | --  |
|            | Ca(ICC2/PI489777)SNP_13423 | 571  | A | C | 6   | 4  | --     | --  |
|            | Ca(ICC2/PI489777)SNP_13424 | 691  | G | A | 8   | 3  | --     | --  |
| CakTC33848 | Ca(ICC2/PI489777)SNP_13425 | 400  | C | G | 3   | 7  | Flower | bud |
|            | Ca(ICC2/PI489777)SNP_13426 | 428  | T | C | 4   | 7  | Flower | bud |
| CakTC29083 | Ca(ICC2/PI489777)SNP_13427 | 288  | C | A | 10  | 3  | --     | --  |
| CakTC24608 | Ca(ICC2/PI489777)SNP_13428 | 1628 | A | G | 7   | 5  | --     | --  |
|            | Ca(ICC2/PI489777)SNP_13429 | 2073 | A | G | 7   | 4  | --     | --  |
| CakTC27455 | Ca(ICC2/PI489777)SNP_13430 | 243  | G | T | 5   | 3  | --     | --  |
|            | Ca(ICC2/PI489777)SNP_13431 | 1489 | G | A | 9   | 4  | --     | --  |
|            | Ca(ICC2/PI489777)SNP_13432 | 1646 | C | G | 9   | 3  | --     | --  |
|            | Ca(ICC2/PI489777)SNP_13433 | 2233 | T | C | 8   | 3  | --     | --  |
|            | Ca(ICC2/PI489777)SNP_13434 | 3465 | A | C | 12  | 6  | --     | --  |
|            | Ca(ICC2/PI489777)SNP_13435 | 3466 | C | A | 12  | 6  | --     | --  |
|            | Ca(ICC2/PI489777)SNP_13436 | 3645 | T | C | 9   | 7  | --     | --  |
|            | Ca(ICC2/PI489777)SNP_13437 | 3860 | G | A | 9   | 3  | --     | --  |
|            | Ca(ICC2/PI489777)SNP_13438 | 3934 | C | T | 8   | 4  | --     | --  |
|            | Ca(ICC2/PI489777)SNP_13439 | 4197 | G | A | 3   | 3  | --     | --  |
| CakTC36012 | Ca(ICC2/PI489777)SNP_13440 | 132  | T | A | 9   | 6  | --     | --  |
|            | Ca(ICC2/PI489777)SNP_13441 | 348  | T | A | 8   | 5  | --     | --  |
| CakTC24588 | Ca(ICC2/PI489777)SNP_13442 | 352  | C | G | 30  | 5  | --     | --  |
|            | Ca(ICC2/PI489777)SNP_13443 | 379  | T | C | 32  | 4  | --     | --  |
|            | Ca(ICC2/PI489777)SNP_13444 | 770  | A | T | 252 | 25 | --     | --  |
| CakTC42393 | Ca(ICC2/PI489777)SNP_13445 | 520  | C | T | 50  | 61 | --     | --  |
| CakTC42139 | Ca(ICC2/PI489777)SNP_13446 | 711  | C | T | 39  | 5  | --     | --  |
| CakTC09711 | Ca(ICC2/PI489777)SNP_13447 | 350  | A | G | 7   | 6  | --     | --  |
|            | Ca(ICC2/PI489777)SNP_13448 | 599  | T | C | 6   | 3  | --     | --  |
| CakTC38196 | Ca(ICC2/PI489777)SNP_13449 | 107  | C | T | 12  | 5  | --     | --  |
|            | Ca(ICC2/PI489777)SNP_13450 | 126  | G | A | 13  | 6  | --     | --  |
|            | Ca(ICC2/PI489777)SNP_13451 | 218  | C | G | 14  | 11 | --     | --  |
|            | Ca(ICC2/PI489777)SNP_13452 | 379  | A | G | 24  | 25 | --     | --  |
|            | Ca(ICC2/PI489777)SNP_13453 | 892  | A | C | 14  | 16 | --     | --  |
|            | Ca(ICC2/PI489777)SNP_13454 | 1111 | A | G | 26  | 12 | --     | --  |
|            | Ca(ICC2/PI489777)SNP_13455 | 1288 | A | G | 27  | 23 | --     | --  |
|            | Ca(ICC2/PI489777)SNP_13456 | 1312 | C | T | 26  | 23 | --     | --  |
| CakTC24745 | Ca(ICC2/PI489777)SNP_13457 | 493  | G | A | 5   | 5  | --     | --  |
|            | Ca(ICC2/PI489777)SNP_13458 | 721  | T | G | 10  | 6  | --     | --  |
|            | Ca(ICC2/PI489777)SNP_13459 | 1072 | C | G | 12  | 3  | --     | --  |
|            | Ca(ICC2/PI489777)SNP_13460 | 1102 | T | C | 8   | 3  | --     | --  |
|            | Ca(ICC2/PI489777)SNP_13461 | 1183 | A | G | 9   | 5  | --     | --  |
|            | Ca(ICC2/PI489777)SNP_13462 | 1438 | C | T | 8   | 10 | --     | --  |
|            | Ca(ICC2/PI489777)SNP_13463 | 4742 | C | T | 9   | 6  | --     | --  |

|            |                            |      |   |   |     |    |        |      |
|------------|----------------------------|------|---|---|-----|----|--------|------|
|            | Ca(ICC2/PI489777)SNP_13464 | 5039 | G | T | 5   | 19 | --     | --   |
| CakTC36042 | Ca(ICC2/PI489777)SNP_13465 | 494  | T | A | 7   | 5  | --     | --   |
|            | Ca(ICC2/PI489777)SNP_13466 | 1754 | G | A | 10  | 9  | --     | --   |
|            | Ca(ICC2/PI489777)SNP_13467 | 2105 | T | A | 4   | 4  | --     | --   |
| CakTC37792 | Ca(ICC2/PI489777)SNP_13468 | 1025 | G | T | 8   | 10 | --     | --   |
|            | Ca(ICC2/PI489777)SNP_13469 | 1304 | G | A | 15  | 9  | --     | --   |
|            | Ca(ICC2/PI489777)SNP_13470 | 1718 | A | G | 17  | 8  | --     | --   |
| CakTC25841 | Ca(ICC2/PI489777)SNP_13471 | 1035 | G | C | 13  | 7  | --     | --   |
| CakTC26623 | Ca(ICC2/PI489777)SNP_13472 | 1647 | G | T | 8   | 4  | Mature | Leaf |
| CakTC25376 | Ca(ICC2/PI489777)SNP_13473 | 139  | A | C | 3   | 3  | --     | --   |
|            | Ca(ICC2/PI489777)SNP_13474 | 463  | C | T | 12  | 11 | --     | --   |
|            | Ca(ICC2/PI489777)SNP_13475 | 466  | G | A | 12  | 11 | --     | --   |
|            | Ca(ICC2/PI489777)SNP_13476 | 1078 | C | A | 11  | 3  | --     | --   |
|            | Ca(ICC2/PI489777)SNP_13477 | 1087 | T | C | 9   | 3  | --     | --   |
|            | Ca(ICC2/PI489777)SNP_13478 | 1630 | G | A | 11  | 4  | --     | --   |
|            | Ca(ICC2/PI489777)SNP_13479 | 1656 | G | A | 13  | 5  | --     | --   |
|            | Ca(ICC2/PI489777)SNP_13480 | 1700 | G | A | 14  | 4  | --     | --   |
|            | Ca(ICC2/PI489777)SNP_13481 | 1705 | G | T | 13  | 4  | --     | --   |
|            | Ca(ICC2/PI489777)SNP_13482 | 1911 | T | C | 16  | 4  | --     | --   |
| CakTC40458 | Ca(ICC2/PI489777)SNP_13483 | 312  | A | G | 6   | 5  | --     | --   |
|            | Ca(ICC2/PI489777)SNP_13484 | 362  | G | C | 7   | 5  | --     | --   |
|            | Ca(ICC2/PI489777)SNP_13485 | 425  | C | A | 6   | 4  | --     | --   |
| CakTC32800 | Ca(ICC2/PI489777)SNP_13486 | 1435 | A | G | 5   | 7  | --     | --   |
|            | Ca(ICC2/PI489777)SNP_13487 | 1917 | A | G | 8   | 3  | --     | --   |
|            | Ca(ICC2/PI489777)SNP_13488 | 2411 | G | A | 9   | 3  | --     | --   |
| CakTC06271 | Ca(ICC2/PI489777)SNP_13489 | 119  | A | C | 4   | 4  | --     | --   |
| CakTC23070 | Ca(ICC2/PI489777)SNP_13490 | 838  | G | A | 62  | 9  | --     | HB   |
|            | Ca(ICC2/PI489777)SNP_13491 | 853  | T | C | 60  | 7  | --     | HB   |
|            | Ca(ICC2/PI489777)SNP_13492 | 856  | G | A | 55  | 7  | --     | HB   |
|            | Ca(ICC2/PI489777)SNP_13493 | 2153 | T | C | 145 | 23 | --     | HB   |
| CakTC41390 | Ca(ICC2/PI489777)SNP_13494 | 679  | G | A | 12  | 7  | --     | --   |
|            | Ca(ICC2/PI489777)SNP_13495 | 1933 | C | T | 6   | 13 | --     | --   |
|            | Ca(ICC2/PI489777)SNP_13496 | 1973 | T | C | 9   | 13 | --     | --   |
|            | Ca(ICC2/PI489777)SNP_13497 | 2268 | A | G | 6   | 12 | --     | --   |
|            | Ca(ICC2/PI489777)SNP_13498 | 2415 | A | G | 3   | 8  | --     | --   |
| CakTC10843 | Ca(ICC2/PI489777)SNP_13499 | 57   | G | A | 24  | 13 | --     | --   |
| CakTC31216 | Ca(ICC2/PI489777)SNP_13500 | 548  | G | A | 33  | 8  | --     | HB   |
|            | Ca(ICC2/PI489777)SNP_13501 | 563  | G | A | 37  | 8  | --     | HB   |
|            | Ca(ICC2/PI489777)SNP_13502 | 575  | C | T | 35  | 6  | --     | HB   |
|            | Ca(ICC2/PI489777)SNP_13503 | 581  | A | G | 35  | 6  | --     | HB   |
|            | Ca(ICC2/PI489777)SNP_13504 | 629  | G | A | 35  | 5  | --     | HB   |
|            | Ca(ICC2/PI489777)SNP_13505 | 1514 | T | C | 17  | 4  | --     | HB   |
| CakTC38468 | Ca(ICC2/PI489777)SNP_13506 | 287  | C | T | 11  | 6  | --     | --   |
| CakTC28755 | Ca(ICC2/PI489777)SNP_13507 | 1796 | C | G | 3   | 3  | --     | --   |
| CakTC10407 | Ca(ICC2/PI489777)SNP_13508 | 135  | C | T | 4   | 3  | --     | --   |
| CakTC38902 | Ca(ICC2/PI489777)SNP_13509 | 53   | T | G | 26  | 11 | --     | --   |
|            | Ca(ICC2/PI489777)SNP_13510 | 54   | T | C | 26  | 11 | --     | --   |
|            | Ca(ICC2/PI489777)SNP_13511 | 85   | A | C | 22  | 14 | --     | --   |
|            | Ca(ICC2/PI489777)SNP_13512 | 1016 | G | A | 19  | 7  | --     | --   |
| CakTC34689 | Ca(ICC2/PI489777)SNP_13513 | 512  | G | A | 4   | 4  | --     | SNF2 |
|            | Ca(ICC2/PI489777)SNP_13514 | 2227 | C | T | 6   | 3  | --     | SNF2 |
|            | Ca(ICC2/PI489777)SNP_13515 | 3064 | C | T | 5   | 5  | --     | SNF2 |
|            | Ca(ICC2/PI489777)SNP_13516 | 3172 | C | T | 8   | 6  | --     | SNF2 |
|            | Ca(ICC2/PI489777)SNP_13517 | 3298 | T | G | 7   | 5  | --     | SNF2 |
| CakTC26788 | Ca(ICC2/PI489777)SNP_13518 | 390  | T | A | 6   | 3  | --     | --   |
|            | Ca(ICC2/PI489777)SNP_13519 | 406  | G | C | 7   | 3  | --     | --   |
|            | Ca(ICC2/PI489777)SNP_13520 | 624  | T | G | 10  | 3  | --     | --   |
|            | Ca(ICC2/PI489777)SNP_13521 | 1131 | A | T | 13  | 4  | --     | --   |
|            | Ca(ICC2/PI489777)SNP_13522 | 1386 | T | C | 12  | 5  | --     | --   |
|            | Ca(ICC2/PI489777)SNP_13523 | 1698 | T | C | 11  | 8  | --     | --   |
| CakTC23738 | Ca(ICC2/PI489777)SNP_13524 | 1315 | C | A | 4   | 4  | --     | --   |
|            | Ca(ICC2/PI489777)SNP_13525 | 1345 | G | C | 5   | 4  | --     | --   |
|            | Ca(ICC2/PI489777)SNP_13526 | 1447 | C | G | 6   | 3  | --     | --   |
|            | Ca(ICC2/PI489777)SNP_13527 | 1477 | G | T | 6   | 3  | --     | --   |
| CakTC39236 | Ca(ICC2/PI489777)SNP_13528 | 152  | A | C | 18  | 12 | --     | --   |
|            | Ca(ICC2/PI489777)SNP_13529 | 170  | G | A | 18  | 12 | --     | --   |
|            | Ca(ICC2/PI489777)SNP_13530 | 1260 | G | A | 27  | 14 | --     | --   |
| CakTC23305 | Ca(ICC2/PI489777)SNP_13531 | 317  | C | T | 7   | 8  | --     | --   |
|            | Ca(ICC2/PI489777)SNP_13532 | 422  | T | C | 9   | 11 | --     | --   |
| CakTC37956 | Ca(ICC2/PI489777)SNP_13533 | 87   | C | T | 12  | 8  | --     | --   |
|            | Ca(ICC2/PI489777)SNP_13534 | 118  | T | A | 10  | 9  | --     | --   |
|            | Ca(ICC2/PI489777)SNP_13535 | 251  | T | G | 16  | 11 | --     | --   |
|            | Ca(ICC2/PI489777)SNP_13536 | 322  | C | T | 18  | 12 | --     | --   |
|            | Ca(ICC2/PI489777)SNP_13537 | 940  | C | A | 32  | 13 | --     | --   |

|            |                            |      |   |   |     |    |        |      |
|------------|----------------------------|------|---|---|-----|----|--------|------|
|            | Ca(ICC2/PI489777)SNP_13538 | 978  | A | G | 38  | 15 | --     | --   |
|            | Ca(ICC2/PI489777)SNP_13539 | 1012 | C | T | 42  | 21 | --     | --   |
|            | Ca(ICC2/PI489777)SNP_13540 | 1261 | T | C | 29  | 18 | --     | --   |
| CakTC36280 | Ca(ICC2/PI489777)SNP_13541 | 31   | C | T | 35  | 5  | --     | --   |
| CakTC13205 | Ca(ICC2/PI489777)SNP_13542 | 261  | A | G | 39  | 7  | --     | --   |
| CakTC25037 | Ca(ICC2/PI489777)SNP_13543 | 331  | C | T | 19  | 6  | --     | WRKY |
|            | Ca(ICC2/PI489777)SNP_13544 | 509  | C | G | 18  | 6  | --     | WRKY |
| CakTC42961 | Ca(ICC2/PI489777)SNP_13545 | 188  | C | T | 3   | 3  | --     | --   |
|            | Ca(ICC2/PI489777)SNP_13546 | 194  | T | C | 3   | 3  | --     | --   |
|            | Ca(ICC2/PI489777)SNP_13547 | 293  | G | A | 8   | 3  | --     | --   |
| CakTC41229 | Ca(ICC2/PI489777)SNP_13548 | 918  | T | A | 23  | 15 | --     | --   |
|            | Ca(ICC2/PI489777)SNP_13549 | 2017 | C | T | 14  | 10 | --     | --   |
|            | Ca(ICC2/PI489777)SNP_13550 | 2465 | A | G | 8   | 6  | --     | --   |
|            | Ca(ICC2/PI489777)SNP_13551 | 2494 | G | A | 7   | 4  | --     | --   |
| CakTC30411 | Ca(ICC2/PI489777)SNP_13552 | 1259 | G | A | 16  | 3  | Shoot  | --   |
|            | Ca(ICC2/PI489777)SNP_13553 | 1535 | G | A | 9   | 5  | Shoot  | --   |
|            | Ca(ICC2/PI489777)SNP_13554 | 3161 | T | C | 3   | 6  | Shoot  | --   |
|            | Ca(ICC2/PI489777)SNP_13555 | 3188 | A | G | 4   | 8  | Shoot  | --   |
| CakTC23145 | Ca(ICC2/PI489777)SNP_13556 | 74   | A | G | 3   | 4  | --     | --   |
|            | Ca(ICC2/PI489777)SNP_13557 | 879  | T | C | 8   | 3  | --     | --   |
|            | Ca(ICC2/PI489777)SNP_13558 | 908  | C | T | 14  | 9  | --     | --   |
| CakTC30081 | Ca(ICC2/PI489777)SNP_13559 | 240  | T | G | 4   | 3  | --     | --   |
| CakTC26472 | Ca(ICC2/PI489777)SNP_13560 | 518  | A | G | 35  | 26 | --     | bZIP |
|            | Ca(ICC2/PI489777)SNP_13561 | 1481 | C | G | 18  | 14 | --     | bZIP |
| CakTC28150 | Ca(ICC2/PI489777)SNP_13562 | 1530 | G | A | 10  | 4  | --     | --   |
|            | Ca(ICC2/PI489777)SNP_13563 | 1586 | C | T | 11  | 4  | --     | --   |
|            | Ca(ICC2/PI489777)SNP_13564 | 1622 | A | G | 6   | 3  | --     | --   |
|            | Ca(ICC2/PI489777)SNP_13565 | 1811 | T | G | 11  | 3  | --     | --   |
|            | Ca(ICC2/PI489777)SNP_13566 | 1933 | A | G | 13  | 3  | --     | --   |
|            | Ca(ICC2/PI489777)SNP_13567 | 2005 | C | G | 13  | 3  | --     | --   |
|            | Ca(ICC2/PI489777)SNP_13568 | 2075 | G | A | 12  | 3  | --     | --   |
|            | Ca(ICC2/PI489777)SNP_13569 | 2106 | T | G | 11  | 3  | --     | --   |
|            | Ca(ICC2/PI489777)SNP_13570 | 2132 | G | T | 10  | 3  | --     | --   |
| CakTC42202 | Ca(ICC2/PI489777)SNP_13571 | 742  | G | A | 5   | 10 | --     | --   |
|            | Ca(ICC2/PI489777)SNP_13572 | 774  | G | C | 5   | 10 | --     | --   |
|            | Ca(ICC2/PI489777)SNP_13573 | 826  | T | A | 3   | 10 | --     | --   |
| CakTC27769 | Ca(ICC2/PI489777)SNP_13574 | 433  | C | A | 9   | 15 | --     | --   |
|            | Ca(ICC2/PI489777)SNP_13575 | 1264 | A | G | 19  | 16 | --     | --   |
|            | Ca(ICC2/PI489777)SNP_13576 | 1891 | C | T | 23  | 14 | --     | --   |
|            | Ca(ICC2/PI489777)SNP_13577 | 2062 | T | A | 15  | 12 | --     | --   |
| CakTC32184 | Ca(ICC2/PI489777)SNP_13578 | 1368 | G | A | 109 | 58 | --     | --   |
|            | Ca(ICC2/PI489777)SNP_13579 | 1452 | T | C | 103 | 55 | --     | --   |
|            | Ca(ICC2/PI489777)SNP_13580 | 1617 | G | T | 82  | 46 | --     | --   |
|            | Ca(ICC2/PI489777)SNP_13581 | 1674 | G | A | 88  | 55 | --     | --   |
|            | Ca(ICC2/PI489777)SNP_13582 | 1827 | T | A | 130 | 66 | --     | --   |
|            | Ca(ICC2/PI489777)SNP_13583 | 1907 | T | C | 111 | 61 | --     | --   |
|            | Ca(ICC2/PI489777)SNP_13584 | 1947 | G | A | 128 | 56 | --     | --   |
|            | Ca(ICC2/PI489777)SNP_13585 | 2069 | A | G | 118 | 56 | --     | --   |
|            | Ca(ICC2/PI489777)SNP_13586 | 2161 | G | A | 50  | 18 | --     | --   |
| CakTC25583 | Ca(ICC2/PI489777)SNP_13587 | 1415 | C | A | 5   | 3  | --     | --   |
|            | Ca(ICC2/PI489777)SNP_13588 | 1662 | G | A | 9   | 4  | --     | --   |
| CakTC33824 | Ca(ICC2/PI489777)SNP_13589 | 650  | T | A | 8   | 5  | --     | --   |
|            | Ca(ICC2/PI489777)SNP_13590 | 911  | C | A | 3   | 4  | --     | --   |
|            | Ca(ICC2/PI489777)SNP_13591 | 1998 | T | G | 6   | 12 | --     | --   |
|            | Ca(ICC2/PI489777)SNP_13592 | 3189 | A | C | 3   | 3  | --     | --   |
|            | Ca(ICC2/PI489777)SNP_13593 | 4399 | C | T | 3   | 3  | --     | --   |
|            | Ca(ICC2/PI489777)SNP_13594 | 5346 | A | C | 6   | 7  | --     | --   |
|            | Ca(ICC2/PI489777)SNP_13595 | 6388 | C | T | 3   | 7  | --     | --   |
|            | Ca(ICC2/PI489777)SNP_13596 | 7032 | A | G | 7   | 9  | --     | --   |
|            | Ca(ICC2/PI489777)SNP_13597 | 7514 | A | G | 9   | 5  | --     | --   |
|            | Ca(ICC2/PI489777)SNP_13598 | 8294 | T | C | 9   | 9  | --     | --   |
|            | Ca(ICC2/PI489777)SNP_13599 | 8540 | T | C | 10  | 9  | --     | --   |
| CakTC23579 | Ca(ICC2/PI489777)SNP_13600 | 244  | A | G | 26  | 6  | --     | --   |
|            | Ca(ICC2/PI489777)SNP_13601 | 574  | A | G | 7   | 10 | --     | --   |
|            | Ca(ICC2/PI489777)SNP_13602 | 727  | A | G | 5   | 8  | --     | --   |
|            | Ca(ICC2/PI489777)SNP_13603 | 1168 | T | G | 5   | 5  | --     | --   |
|            | Ca(ICC2/PI489777)SNP_13604 | 1186 | G | T | 5   | 5  | --     | --   |
| CakTC30784 | Ca(ICC2/PI489777)SNP_13605 | 1226 | C | A | 8   | 9  | --     | --   |
|            | Ca(ICC2/PI489777)SNP_13606 | 1409 | A | G | 16  | 8  | --     | --   |
|            | Ca(ICC2/PI489777)SNP_13607 | 3083 | A | G | 6   | 23 | --     | --   |
|            | Ca(ICC2/PI489777)SNP_13608 | 3287 | A | G | 4   | 18 | --     | --   |
| CakTC29023 | Ca(ICC2/PI489777)SNP_13609 | 1500 | T | C | 4   | 5  | Flower | bud  |
| CakTC35642 | Ca(ICC2/PI489777)SNP_13610 | 1779 | T | C | 12  | 3  | --     | --   |
|            | Ca(ICC2/PI489777)SNP_13611 | 2473 | G | C | 7   | 9  | --     | --   |



|            |                            |      |   |   |     |    |           |      |
|------------|----------------------------|------|---|---|-----|----|-----------|------|
| CakTC41627 | Ca(ICC2/PI489777)SNP_13612 | 177  | C | T | 17  | 9  | --        | --   |
|            | Ca(ICC2/PI489777)SNP_13613 | 396  | A | T | 8   | 4  | --        | --   |
| CakTC40248 | Ca(ICC2/PI489777)SNP_13614 | 159  | C | A | 32  | 8  | Shoot     | --   |
|            | Ca(ICC2/PI489777)SNP_13615 | 162  | G | A | 32  | 8  | Shoot     | --   |
|            | Ca(ICC2/PI489777)SNP_13616 | 196  | G | T | 36  | 11 | Shoot     | --   |
|            | Ca(ICC2/PI489777)SNP_13617 | 295  | T | C | 39  | 14 | Shoot     | --   |
| CakTC29731 | Ca(ICC2/PI489777)SNP_13618 | 450  | A | C | 7   | 5  | --        | --   |
|            | Ca(ICC2/PI489777)SNP_13619 | 560  | A | G | 5   | 4  | --        | --   |
| CakTC23039 | Ca(ICC2/PI489777)SNP_13620 | 1691 | A | T | 8   | 4  | --        | --   |
|            | Ca(ICC2/PI489777)SNP_13621 | 1945 | A | G | 5   | 7  | --        | --   |
|            | Ca(ICC2/PI489777)SNP_13622 | 1975 | G | C | 5   | 7  | --        | --   |
|            | Ca(ICC2/PI489777)SNP_13623 | 2053 | A | T | 9   | 7  | --        | --   |
|            | Ca(ICC2/PI489777)SNP_13624 | 2057 | A | G | 8   | 6  | --        | --   |
|            | Ca(ICC2/PI489777)SNP_13625 | 2069 | G | A | 12  | 8  | --        | --   |
|            | Ca(ICC2/PI489777)SNP_13626 | 2095 | T | C | 12  | 7  | --        | --   |
|            | Ca(ICC2/PI489777)SNP_13627 | 2203 | C | T | 17  | 11 | --        | --   |
|            | Ca(ICC2/PI489777)SNP_13628 | 2217 | A | G | 17  | 10 | --        | --   |
|            | Ca(ICC2/PI489777)SNP_13629 | 2319 | T | C | 16  | 11 | --        | --   |
|            | Ca(ICC2/PI489777)SNP_13630 | 2635 | T | A | 16  | 9  | --        | --   |
|            | Ca(ICC2/PI489777)SNP_13631 | 2731 | T | C | 12  | 8  | --        | --   |
| CakTC43388 | Ca(ICC2/PI489777)SNP_13632 | 230  | G | C | 17  | 4  | --        | --   |
|            | Ca(ICC2/PI489777)SNP_13633 | 763  | C | T | 5   | 4  | --        | --   |
| CakTC41685 | Ca(ICC2/PI489777)SNP_13634 | 623  | G | C | 10  | 5  | --        | --   |
|            | Ca(ICC2/PI489777)SNP_13635 | 679  | T | C | 7   | 4  | --        | --   |
| CakTC34398 | Ca(ICC2/PI489777)SNP_13636 | 198  | A | G | 5   | 3  | --        | FAR1 |
| CakTC33633 | Ca(ICC2/PI489777)SNP_13637 | 232  | C | A | 3   | 3  | --        | --   |
|            | Ca(ICC2/PI489777)SNP_13638 | 393  | G | A | 4   | 5  | --        | --   |
| CakTC23181 | Ca(ICC2/PI489777)SNP_13639 | 890  | T | C | 20  | 25 | --        | --   |
| CakTC06609 | Ca(ICC2/PI489777)SNP_13640 | 82   | A | G | 3   | 3  | Young_pod | --   |
|            | Ca(ICC2/PI489777)SNP_13641 | 92   | T | C | 3   | 4  | Young_pod | --   |
|            | Ca(ICC2/PI489777)SNP_13642 | 475  | T | C | 5   | 7  | Young_pod | --   |
|            | Ca(ICC2/PI489777)SNP_13643 | 505  | C | T | 3   | 9  | Young_pod | --   |
|            | Ca(ICC2/PI489777)SNP_13644 | 521  | G | A | 5   | 9  | Young_pod | --   |
|            | Ca(ICC2/PI489777)SNP_13645 | 625  | G | A | 4   | 4  | Young_pod | --   |
|            | Ca(ICC2/PI489777)SNP_13646 | 898  | C | T | 4   | 6  | Young_pod | --   |
|            | Ca(ICC2/PI489777)SNP_13647 | 1012 | T | G | 3   | 7  | Young_pod | --   |
|            | Ca(ICC2/PI489777)SNP_13648 | 1432 | T | C | 7   | 7  | Young_pod | --   |
|            | Ca(ICC2/PI489777)SNP_13649 | 1651 | A | C | 4   | 8  | Young_pod | --   |
| CakTC39929 | Ca(ICC2/PI489777)SNP_13650 | 70   | T | A | 5   | 10 | --        | --   |
|            | Ca(ICC2/PI489777)SNP_13651 | 393  | C | T | 9   | 8  | --        | --   |
|            | Ca(ICC2/PI489777)SNP_13652 | 729  | C | T | 13  | 4  | --        | --   |
|            | Ca(ICC2/PI489777)SNP_13653 | 861  | A | T | 9   | 7  | --        | --   |
|            | Ca(ICC2/PI489777)SNP_13654 | 1048 | G | C | 7   | 8  | --        | --   |
|            | Ca(ICC2/PI489777)SNP_13655 | 1114 | G | T | 5   | 6  | --        | --   |
|            | Ca(ICC2/PI489777)SNP_13656 | 1699 | C | T | 9   | 4  | --        | --   |
| CakTC34456 | Ca(ICC2/PI489777)SNP_13657 | 374  | T | C | 4   | 4  | --        | --   |
|            | Ca(ICC2/PI489777)SNP_13658 | 426  | A | T | 4   | 6  | --        | --   |
| CakTC40322 | Ca(ICC2/PI489777)SNP_13659 | 18   | C | A | 8   | 3  | --        | --   |
|            | Ca(ICC2/PI489777)SNP_13660 | 19   | A | T | 7   | 3  | --        | --   |
|            | Ca(ICC2/PI489777)SNP_13661 | 169  | A | T | 100 | 36 | --        | --   |
|            | Ca(ICC2/PI489777)SNP_13662 | 349  | A | C | 103 | 64 | --        | --   |
| CakTC42972 | Ca(ICC2/PI489777)SNP_13663 | 65   | A | G | 15  | 5  | --        | --   |
|            | Ca(ICC2/PI489777)SNP_13664 | 612  | T | C | 32  | 13 | --        | --   |
| CakTC03736 | Ca(ICC2/PI489777)SNP_13665 | 107  | A | C | 7   | 3  | --        | --   |
| CakTC28451 | Ca(ICC2/PI489777)SNP_13666 | 1327 | T | C | 3   | 3  | --        | --   |
| CakTC11451 | Ca(ICC2/PI489777)SNP_13667 | 621  | A | G | 6   | 11 | --        | --   |
|            | Ca(ICC2/PI489777)SNP_13668 | 1681 | C | T | 4   | 5  | --        | --   |
|            | Ca(ICC2/PI489777)SNP_13669 | 2415 | G | C | 3   | 7  | --        | --   |
| CakTC39922 | Ca(ICC2/PI489777)SNP_13670 | 391  | G | A | 15  | 7  | --        | --   |
|            | Ca(ICC2/PI489777)SNP_13671 | 523  | A | G | 17  | 7  | --        | --   |
|            | Ca(ICC2/PI489777)SNP_13672 | 865  | C | T | 8   | 7  | --        | --   |
|            | Ca(ICC2/PI489777)SNP_13673 | 880  | C | T | 7   | 9  | --        | --   |
|            | Ca(ICC2/PI489777)SNP_13674 | 940  | A | G | 8   | 12 | --        | --   |
|            | Ca(ICC2/PI489777)SNP_13675 | 970  | G | T | 9   | 11 | --        | --   |
|            | Ca(ICC2/PI489777)SNP_13676 | 1031 | T | G | 12  | 14 | --        | --   |
| CakTC39834 | Ca(ICC2/PI489777)SNP_13677 | 135  | A | G | 23  | 7  | --        | --   |
|            | Ca(ICC2/PI489777)SNP_13678 | 627  | A | G | 17  | 14 | --        | --   |
|            | Ca(ICC2/PI489777)SNP_13679 | 756  | C | T | 14  | 10 | --        | --   |
|            | Ca(ICC2/PI489777)SNP_13680 | 876  | A | T | 17  | 9  | --        | --   |
|            | Ca(ICC2/PI489777)SNP_13681 | 952  | G | A | 14  | 5  | --        | --   |
|            | Ca(ICC2/PI489777)SNP_13682 | 1031 | C | T | 13  | 3  | --        | --   |
|            | Ca(ICC2/PI489777)SNP_13683 | 1060 | A | T | 12  | 4  | --        | --   |
| CakTC31586 | Ca(ICC2/PI489777)SNP_13684 | 478  | T | C | 3   | 6  | --        | --   |
|            | Ca(ICC2/PI489777)SNP_13685 | 532  | G | A | 3   | 6  | --        | --   |

|            |                            |      |   |   |    |    |           |         |
|------------|----------------------------|------|---|---|----|----|-----------|---------|
|            | Ca(ICC2/PI489777)SNP_13686 | 988  | C | T | 15 | 9  | --        | --      |
|            | Ca(ICC2/PI489777)SNP_13687 | 1426 | G | A | 10 | 9  | --        | --      |
|            | Ca(ICC2/PI489777)SNP_13688 | 1789 | T | C | 9  | 5  | --        | --      |
| CakTC16999 | Ca(ICC2/PI489777)SNP_13689 | 30   | T | C | 5  | 6  | Young_pod | --      |
|            | Ca(ICC2/PI489777)SNP_13690 | 72   | A | G | 4  | 7  | Young_pod | --      |
|            | Ca(ICC2/PI489777)SNP_13691 | 128  | T | G | 7  | 8  | Young_pod | --      |
| CakTC43086 | Ca(ICC2/PI489777)SNP_13692 | 234  | A | C | 4  | 6  | --        | --      |
|            | Ca(ICC2/PI489777)SNP_13693 | 535  | G | A | 9  | 6  | --        | --      |
|            | Ca(ICC2/PI489777)SNP_13694 | 543  | C | T | 8  | 5  | --        | --      |
|            | Ca(ICC2/PI489777)SNP_13695 | 553  | C | T | 9  | 6  | --        | --      |
|            | Ca(ICC2/PI489777)SNP_13696 | 559  | T | G | 9  | 5  | --        | --      |
|            | Ca(ICC2/PI489777)SNP_13697 | 645  | T | C | 9  | 6  | --        | --      |
|            | Ca(ICC2/PI489777)SNP_13698 | 666  | G | C | 11 | 5  | --        | --      |
|            | Ca(ICC2/PI489777)SNP_13699 | 686  | A | C | 12 | 5  | --        | --      |
|            | Ca(ICC2/PI489777)SNP_13700 | 739  | A | T | 6  | 5  | --        | --      |
|            | Ca(ICC2/PI489777)SNP_13701 | 1085 | G | A | 14 | 4  | --        | --      |
|            | Ca(ICC2/PI489777)SNP_13702 | 1148 | T | C | 14 | 6  | --        | --      |
|            | Ca(ICC2/PI489777)SNP_13703 | 1613 | G | A | 15 | 11 | --        | --      |
|            | Ca(ICC2/PI489777)SNP_13704 | 1709 | A | G | 17 | 11 | --        | --      |
|            | Ca(ICC2/PI489777)SNP_13705 | 1880 | T | A | 12 | 10 | --        | --      |
| CakTC38385 | Ca(ICC2/PI489777)SNP_13706 | 42   | G | C | 10 | 17 | --        | --      |
|            | Ca(ICC2/PI489777)SNP_13707 | 546  | C | A | 6  | 24 | --        | --      |
|            | Ca(ICC2/PI489777)SNP_13708 | 736  | A | C | 10 | 17 | --        | --      |
|            | Ca(ICC2/PI489777)SNP_13709 | 819  | C | T | 10 | 17 | --        | --      |
| CakTC31706 | Ca(ICC2/PI489777)SNP_13710 | 1927 | C | G | 6  | 13 | --        | --      |
| CakTC15944 | Ca(ICC2/PI489777)SNP_13711 | 658  | A | T | 3  | 3  | --        | Jumonji |
| CakTC41385 | Ca(ICC2/PI489777)SNP_13712 | 541  | A | C | 12 | 44 | Root      | --      |
|            | Ca(ICC2/PI489777)SNP_13713 | 598  | A | G | 7  | 19 | Root      | --      |
|            | Ca(ICC2/PI489777)SNP_13714 | 604  | T | A | 7  | 19 | Root      | --      |
|            | Ca(ICC2/PI489777)SNP_13715 | 641  | G | A | 5  | 6  | Root      | --      |
|            | Ca(ICC2/PI489777)SNP_13716 | 660  | G | A | 6  | 7  | Root      | --      |
| CakTC30965 | Ca(ICC2/PI489777)SNP_13717 | 422  | G | T | 3  | 4  | --        | --      |
| CakTC40128 | Ca(ICC2/PI489777)SNP_13718 | 200  | G | C | 15 | 6  | --        | --      |
|            | Ca(ICC2/PI489777)SNP_13719 | 1009 | A | G | 30 | 20 | --        | --      |
| CakTC28184 | Ca(ICC2/PI489777)SNP_13720 | 161  | T | C | 28 | 28 | --        | --      |
| CakTC38734 | Ca(ICC2/PI489777)SNP_13721 | 1153 | T | C | 5  | 11 | --        | --      |
|            | Ca(ICC2/PI489777)SNP_13722 | 1195 | C | G | 5  | 9  | --        | --      |
| CakTC24630 | Ca(ICC2/PI489777)SNP_13723 | 379  | G | C | 3  | 3  | --        | --      |
| CakTC37823 | Ca(ICC2/PI489777)SNP_13724 | 469  | G | A | 6  | 7  | --        | --      |
|            | Ca(ICC2/PI489777)SNP_13725 | 707  | C | T | 26 | 20 | --        | --      |
|            | Ca(ICC2/PI489777)SNP_13726 | 804  | G | A | 32 | 19 | --        | --      |
|            | Ca(ICC2/PI489777)SNP_13727 | 1414 | T | A | 29 | 5  | --        | --      |
| CakTC36433 | Ca(ICC2/PI489777)SNP_13728 | 1052 | T | C | 3  | 9  | --        | --      |
|            | Ca(ICC2/PI489777)SNP_13729 | 1972 | A | G | 3  | 8  | --        | --      |
|            | Ca(ICC2/PI489777)SNP_13730 | 2479 | T | C | 12 | 3  | --        | --      |
|            | Ca(ICC2/PI489777)SNP_13731 | 2824 | C | T | 7  | 7  | --        | --      |
| CakTC22348 | Ca(ICC2/PI489777)SNP_13732 | 2049 | T | C | 6  | 5  | --        | FHA     |
|            | Ca(ICC2/PI489777)SNP_13733 | 2146 | G | C | 7  | 6  | --        | FHA     |
|            | Ca(ICC2/PI489777)SNP_13734 | 2503 | G | C | 11 | 16 | --        | FHA     |
|            | Ca(ICC2/PI489777)SNP_13735 | 2591 | T | C | 7  | 12 | --        | FHA     |
| CakTC41658 | Ca(ICC2/PI489777)SNP_13736 | 51   | C | T | 9  | 4  | --        | --      |
|            | Ca(ICC2/PI489777)SNP_13737 | 60   | T | A | 8  | 4  | --        | --      |
|            | Ca(ICC2/PI489777)SNP_13738 | 409  | A | T | 10 | 5  | --        | --      |
| CakTC37649 | Ca(ICC2/PI489777)SNP_13739 | 173  | T | C | 7  | 3  | --        | --      |
|            | Ca(ICC2/PI489777)SNP_13740 | 207  | G | C | 7  | 4  | --        | --      |
|            | Ca(ICC2/PI489777)SNP_13741 | 366  | T | C | 19 | 8  | --        | --      |
|            | Ca(ICC2/PI489777)SNP_13742 | 720  | C | T | 16 | 11 | --        | --      |
|            | Ca(ICC2/PI489777)SNP_13743 | 735  | G | T | 15 | 12 | --        | --      |
|            | Ca(ICC2/PI489777)SNP_13744 | 921  | A | G | 6  | 9  | --        | --      |
|            | Ca(ICC2/PI489777)SNP_13745 | 1017 | T | A | 8  | 15 | --        | --      |
|            | Ca(ICC2/PI489777)SNP_13746 | 1124 | T | G | 10 | 13 | --        | --      |
|            | Ca(ICC2/PI489777)SNP_13747 | 1270 | G | A | 6  | 7  | --        | --      |
| CakTC40591 | Ca(ICC2/PI489777)SNP_13748 | 542  | C | A | 4  | 8  | --        | --      |
|            | Ca(ICC2/PI489777)SNP_13749 | 659  | G | A | 3  | 6  | --        | --      |
|            | Ca(ICC2/PI489777)SNP_13750 | 825  | T | C | 3  | 3  | --        | --      |
|            | Ca(ICC2/PI489777)SNP_13751 | 1092 | T | G | 3  | 4  | --        | --      |
|            | Ca(ICC2/PI489777)SNP_13752 | 1142 | T | C | 3  | 4  | --        | --      |
|            | Ca(ICC2/PI489777)SNP_13753 | 1752 | T | C | 5  | 3  | --        | --      |
| CakTC24145 | Ca(ICC2/PI489777)SNP_13754 | 377  | T | C | 6  | 3  | --        | --      |
| CakTC37132 | Ca(ICC2/PI489777)SNP_13755 | 985  | T | A | 72 | 55 | --        | --      |
|            | Ca(ICC2/PI489777)SNP_13756 | 1150 | C | A | 45 | 38 | --        | --      |
| CakTC41417 | Ca(ICC2/PI489777)SNP_13757 | 283  | A | G | 5  | 10 | --        | --      |
|            | Ca(ICC2/PI489777)SNP_13758 | 313  | C | T | 5  | 10 | --        | --      |
|            | Ca(ICC2/PI489777)SNP_13759 | 401  | G | A | 8  | 11 | --        | --      |

|            |                            |      |   |   |     |     |    |      |
|------------|----------------------------|------|---|---|-----|-----|----|------|
|            | Ca(ICC2/PI489777)SNP_13760 | 430  | C | T | 8   | 11  | -- | --   |
|            | Ca(ICC2/PI489777)SNP_13761 | 2078 | C | G | 27  | 15  | -- | --   |
|            | Ca(ICC2/PI489777)SNP_13762 | 2092 | G | A | 21  | 15  | -- | --   |
| CakTC10286 | Ca(ICC2/PI489777)SNP_13763 | 979  | T | C | 5   | 8   | -- | --   |
|            | Ca(ICC2/PI489777)SNP_13764 | 1052 | A | G | 6   | 7   | -- | --   |
|            | Ca(ICC2/PI489777)SNP_13765 | 1247 | G | A | 3   | 6   | -- | --   |
|            | Ca(ICC2/PI489777)SNP_13766 | 1344 | T | C | 4   | 6   | -- | --   |
| CakTC27335 | Ca(ICC2/PI489777)SNP_13767 | 682  | T | C | 16  | 12  | -- | bZIP |
|            | Ca(ICC2/PI489777)SNP_13768 | 1089 | C | T | 23  | 11  | -- | bZIP |
|            | Ca(ICC2/PI489777)SNP_13769 | 1368 | G | T | 32  | 17  | -- | bZIP |
|            | Ca(ICC2/PI489777)SNP_13770 | 1371 | T | G | 32  | 18  | -- | bZIP |
|            | Ca(ICC2/PI489777)SNP_13771 | 1527 | C | T | 16  | 10  | -- | bZIP |
| CakTC36858 | Ca(ICC2/PI489777)SNP_13772 | 258  | T | C | 6   | 3   | -- | --   |
| CakTC23750 | Ca(ICC2/PI489777)SNP_13773 | 4425 | T | C | 9   | 17  | -- | CCHC |
|            | Ca(ICC2/PI489777)SNP_13774 | 4428 | C | T | 8   | 16  | -- | CCHC |
|            | Ca(ICC2/PI489777)SNP_13775 | 4569 | T | C | 11  | 19  | -- | CCHC |
| CakTC32590 | Ca(ICC2/PI489777)SNP_13776 | 1781 | G | T | 15  | 3   | -- | --   |
|            | Ca(ICC2/PI489777)SNP_13777 | 2092 | T | C | 12  | 7   | -- | --   |
| CakTC41651 | Ca(ICC2/PI489777)SNP_13778 | 260  | G | C | 3   | 3   | -- | --   |
|            | Ca(ICC2/PI489777)SNP_13779 | 335  | T | C | 4   | 3   | -- | --   |
| CakTC37163 | Ca(ICC2/PI489777)SNP_13780 | 529  | A | T | 4   | 4   | -- | --   |
|            | Ca(ICC2/PI489777)SNP_13781 | 727  | G | A | 7   | 6   | -- | --   |
| CakTC41896 | Ca(ICC2/PI489777)SNP_13782 | 1706 | C | G | 8   | 4   | -- | --   |
|            | Ca(ICC2/PI489777)SNP_13783 | 1707 | A | G | 8   | 4   | -- | --   |
| CakTC28719 | Ca(ICC2/PI489777)SNP_13784 | 463  | C | G | 40  | 20  | -- | --   |
|            | Ca(ICC2/PI489777)SNP_13785 | 1833 | G | A | 43  | 15  | -- | --   |
| CakTC40851 | Ca(ICC2/PI489777)SNP_13786 | 582  | A | G | 29  | 20  | -- | --   |
|            | Ca(ICC2/PI489777)SNP_13787 | 672  | G | A | 20  | 18  | -- | --   |
|            | Ca(ICC2/PI489777)SNP_13788 | 692  | A | G | 18  | 16  | -- | --   |
|            | Ca(ICC2/PI489777)SNP_13789 | 772  | G | C | 7   | 10  | -- | --   |
| CakTC42978 | Ca(ICC2/PI489777)SNP_13790 | 957  | C | A | 6   | 3   | -- | --   |
|            | Ca(ICC2/PI489777)SNP_13791 | 987  | G | A | 3   | 4   | -- | --   |
|            | Ca(ICC2/PI489777)SNP_13792 | 1307 | C | T | 4   | 5   | -- | --   |
|            | Ca(ICC2/PI489777)SNP_13793 | 1316 | G | A | 7   | 5   | -- | --   |
|            | Ca(ICC2/PI489777)SNP_13794 | 1325 | A | G | 7   | 6   | -- | --   |
| CakTC28394 | Ca(ICC2/PI489777)SNP_13795 | 312  | C | T | 15  | 5   | -- | bHLH |
| CakTC42362 | Ca(ICC2/PI489777)SNP_13796 | 1467 | T | C | 15  | 10  | -- | --   |
|            | Ca(ICC2/PI489777)SNP_13797 | 1522 | C | T | 11  | 9   | -- | --   |
| CakTC13600 | Ca(ICC2/PI489777)SNP_13798 | 168  | T | C | 5   | 4   | -- | --   |
| CakTC39243 | Ca(ICC2/PI489777)SNP_13799 | 40   | A | C | 6   | 8   | -- | --   |
|            | Ca(ICC2/PI489777)SNP_13800 | 238  | A | T | 12  | 14  | -- | --   |
|            | Ca(ICC2/PI489777)SNP_13801 | 1398 | A | G | 5   | 19  | -- | --   |
| CakTC22936 | Ca(ICC2/PI489777)SNP_13802 | 362  | T | C | 15  | 4   | -- | --   |
| CakTC26432 | Ca(ICC2/PI489777)SNP_13803 | 1445 | A | C | 213 | 202 | -- | --   |
| CakTC10471 | Ca(ICC2/PI489777)SNP_13804 | 646  | G | A | 4   | 4   | -- | --   |
| CakTC23893 | Ca(ICC2/PI489777)SNP_13805 | 217  | G | A | 6   | 3   | -- | bHLH |
|            | Ca(ICC2/PI489777)SNP_13806 | 702  | T | G | 17  | 16  | -- | bHLH |
|            | Ca(ICC2/PI489777)SNP_13807 | 718  | T | G | 16  | 20  | -- | bHLH |
|            | Ca(ICC2/PI489777)SNP_13808 | 769  | C | T | 15  | 24  | -- | bHLH |
|            | Ca(ICC2/PI489777)SNP_13809 | 1012 | T | G | 26  | 12  | -- | bHLH |
|            | Ca(ICC2/PI489777)SNP_13810 | 1183 | A | G | 16  | 9   | -- | bHLH |
|            | Ca(ICC2/PI489777)SNP_13811 | 1461 | T | C | 24  | 19  | -- | bHLH |
|            | Ca(ICC2/PI489777)SNP_13812 | 1468 | A | G | 25  | 19  | -- | bHLH |
|            | Ca(ICC2/PI489777)SNP_13813 | 1483 | T | A | 25  | 19  | -- | bHLH |
|            | Ca(ICC2/PI489777)SNP_13814 | 1546 | G | A | 24  | 19  | -- | bHLH |
|            | Ca(ICC2/PI489777)SNP_13815 | 1582 | A | G | 22  | 17  | -- | bHLH |
|            | Ca(ICC2/PI489777)SNP_13816 | 1635 | A | G | 26  | 16  | -- | bHLH |
| CakTC25525 | Ca(ICC2/PI489777)SNP_13817 | 205  | C | T | 17  | 3   | -- | --   |
|            | Ca(ICC2/PI489777)SNP_13818 | 886  | G | C | 16  | 3   | -- | --   |
|            | Ca(ICC2/PI489777)SNP_13819 | 969  | G | A | 13  | 3   | -- | --   |
| CakTC28811 | Ca(ICC2/PI489777)SNP_13820 | 275  | A | T | 42  | 40  | -- | --   |
|            | Ca(ICC2/PI489777)SNP_13821 | 510  | T | A | 55  | 47  | -- | --   |
|            | Ca(ICC2/PI489777)SNP_13822 | 1451 | T | A | 7   | 9   | -- | --   |
| CakTC38843 | Ca(ICC2/PI489777)SNP_13823 | 651  | G | A | 13  | 10  | -- | C3H  |
| CakTC35785 | Ca(ICC2/PI489777)SNP_13824 | 582  | T | A | 54  | 29  | -- | --   |
|            | Ca(ICC2/PI489777)SNP_13825 | 749  | G | A | 41  | 31  | -- | --   |
|            | Ca(ICC2/PI489777)SNP_13826 | 1022 | G | A | 35  | 18  | -- | --   |
|            | Ca(ICC2/PI489777)SNP_13827 | 1044 | G | C | 31  | 13  | -- | --   |
|            | Ca(ICC2/PI489777)SNP_13828 | 2063 | C | A | 23  | 7   | -- | --   |
|            | Ca(ICC2/PI489777)SNP_13829 | 2780 | G | A | 19  | 11  | -- | --   |
|            | Ca(ICC2/PI489777)SNP_13830 | 3173 | G | A | 6   | 18  | -- | --   |
|            | Ca(ICC2/PI489777)SNP_13831 | 3252 | A | G | 9   | 16  | -- | --   |
| CakTC29882 | Ca(ICC2/PI489777)SNP_13832 | 476  | C | A | 19  | 5   | -- | --   |
|            | Ca(ICC2/PI489777)SNP_13833 | 557  | A | G | 24  | 4   | -- | --   |

|            |                            |      |   |   |    |    |        |          |
|------------|----------------------------|------|---|---|----|----|--------|----------|
|            | Ca(ICC2/PI489777)SNP_13834 | 722  | C | T | 32 | 5  | --     | --       |
|            | Ca(ICC2/PI489777)SNP_13835 | 1226 | T | C | 13 | 7  | --     | --       |
|            | Ca(ICC2/PI489777)SNP_13836 | 1463 | C | T | 17 | 7  | --     | --       |
|            | Ca(ICC2/PI489777)SNP_13837 | 1630 | A | C | 12 | 5  | --     | --       |
|            | Ca(ICC2/PI489777)SNP_13838 | 1807 | T | C | 15 | 5  | --     | --       |
|            | Ca(ICC2/PI489777)SNP_13839 | 1855 | A | G | 12 | 5  | --     | --       |
| CakTC42073 | Ca(ICC2/PI489777)SNP_13840 | 63   | T | G | 13 | 6  | --     | --       |
|            | Ca(ICC2/PI489777)SNP_13841 | 82   | C | T | 15 | 6  | --     | --       |
|            | Ca(ICC2/PI489777)SNP_13842 | 696  | G | A | 20 | 8  | --     | --       |
|            | Ca(ICC2/PI489777)SNP_13843 | 800  | G | A | 18 | 5  | --     | --       |
| CakTC35312 | Ca(ICC2/PI489777)SNP_13844 | 1688 | A | G | 19 | 10 | --     | --       |
|            | Ca(ICC2/PI489777)SNP_13845 | 2741 | A | C | 10 | 5  | --     | --       |
| CakTC31880 | Ca(ICC2/PI489777)SNP_13846 | 1154 | A | G | 5  | 5  | --     | --       |
|            | Ca(ICC2/PI489777)SNP_13847 | 1188 | G | A | 5  | 6  | --     | --       |
| CakTC33466 | Ca(ICC2/PI489777)SNP_13848 | 235  | T | C | 6  | 6  | Flower | bud      |
|            | Ca(ICC2/PI489777)SNP_13849 | 303  | A | T | 9  | 6  | Flower | bud      |
|            | Ca(ICC2/PI489777)SNP_13850 | 417  | C | T | 10 | 6  | Flower | bud      |
|            | Ca(ICC2/PI489777)SNP_13851 | 418  | T | A | 11 | 6  | Flower | bud      |
|            | Ca(ICC2/PI489777)SNP_13852 | 467  | C | T | 10 | 3  | Flower | bud      |
| CakTC27226 | Ca(ICC2/PI489777)SNP_13853 | 1210 | T | C | 4  | 14 | Flower | bud      |
|            | Ca(ICC2/PI489777)SNP_13854 | 1444 | C | A | 3  | 11 | Flower | bud      |
|            | Ca(ICC2/PI489777)SNP_13855 | 1446 | G | C | 3  | 12 | Flower | bud      |
| CakTC37784 | Ca(ICC2/PI489777)SNP_13856 | 193  | T | A | 3  | 7  | --     | --       |
|            | Ca(ICC2/PI489777)SNP_13857 | 223  | T | C | 4  | 5  | --     | --       |
| CakTC38719 | Ca(ICC2/PI489777)SNP_13858 | 516  | A | C | 29 | 22 | --     | --       |
|            | Ca(ICC2/PI489777)SNP_13859 | 621  | C | T | 23 | 12 | --     | --       |
| CakTC29975 | Ca(ICC2/PI489777)SNP_13860 | 417  | A | G | 14 | 5  | --     | --       |
|            | Ca(ICC2/PI489777)SNP_13861 | 576  | C | A | 10 | 5  | --     | --       |
| CakTC08090 | Ca(ICC2/PI489777)SNP_13862 | 1538 | C | T | 6  | 6  | --     | TPR      |
| CakTC22750 | Ca(ICC2/PI489777)SNP_13863 | 437  | G | A | 34 | 10 | --     | --       |
|            | Ca(ICC2/PI489777)SNP_13864 | 2572 | G | A | 7  | 6  | --     | --       |
|            | Ca(ICC2/PI489777)SNP_13865 | 2764 | A | G | 16 | 4  | --     | --       |
| CakTC38869 | Ca(ICC2/PI489777)SNP_13866 | 95   | A | G | 12 | 3  | --     | Trihelix |
|            | Ca(ICC2/PI489777)SNP_13867 | 288  | G | A | 21 | 6  | --     | Trihelix |
|            | Ca(ICC2/PI489777)SNP_13868 | 548  | T | C | 21 | 4  | --     | Trihelix |
|            | Ca(ICC2/PI489777)SNP_13869 | 1028 | G | A | 3  | 4  | --     | Trihelix |
| CakTC36667 | Ca(ICC2/PI489777)SNP_13870 | 283  | T | C | 7  | 9  | --     | --       |
| CakTC30258 | Ca(ICC2/PI489777)SNP_13871 | 568  | T | C | 11 | 3  | --     | mTERF    |
|            | Ca(ICC2/PI489777)SNP_13872 | 847  | T | G | 4  | 3  | --     | mTERF    |
| CakTC36851 | Ca(ICC2/PI489777)SNP_13873 | 238  | G | A | 3  | 10 | --     | --       |
|            | Ca(ICC2/PI489777)SNP_13874 | 266  | G | A | 3  | 12 | --     | --       |
| CakTC33980 | Ca(ICC2/PI489777)SNP_13875 | 81   | G | T | 11 | 10 | --     | --       |
|            | Ca(ICC2/PI489777)SNP_13876 | 1999 | A | C | 7  | 7  | --     | --       |
| CakTC28818 | Ca(ICC2/PI489777)SNP_13877 | 1603 | T | C | 15 | 3  | --     | --       |
|            | Ca(ICC2/PI489777)SNP_13878 | 1641 | G | A | 13 | 4  | --     | --       |
|            | Ca(ICC2/PI489777)SNP_13879 | 1785 | A | G | 8  | 4  | --     | --       |
| CakTC23830 | Ca(ICC2/PI489777)SNP_13880 | 883  | T | G | 15 | 4  | --     | --       |
|            | Ca(ICC2/PI489777)SNP_13881 | 975  | C | T | 21 | 6  | --     | --       |
|            | Ca(ICC2/PI489777)SNP_13882 | 1456 | A | C | 19 | 6  | --     | --       |
|            | Ca(ICC2/PI489777)SNP_13883 | 1461 | G | A | 19 | 6  | --     | --       |
|            | Ca(ICC2/PI489777)SNP_13884 | 1623 | T | C | 10 | 6  | --     | --       |
|            | Ca(ICC2/PI489777)SNP_13885 | 2257 | G | A | 25 | 8  | --     | --       |
|            | Ca(ICC2/PI489777)SNP_13886 | 2465 | A | G | 18 | 9  | --     | --       |
|            | Ca(ICC2/PI489777)SNP_13887 | 2574 | C | T | 23 | 8  | --     | --       |
| CakTC40173 | Ca(ICC2/PI489777)SNP_13888 | 845  | C | T | 10 | 3  | --     | --       |
|            | Ca(ICC2/PI489777)SNP_13889 | 1153 | C | G | 7  | 6  | --     | --       |
| CakTC39966 | Ca(ICC2/PI489777)SNP_13890 | 216  | G | A | 27 | 8  | --     | --       |
|            | Ca(ICC2/PI489777)SNP_13891 | 1247 | G | A | 6  | 3  | --     | --       |
|            | Ca(ICC2/PI489777)SNP_13892 | 1253 | T | A | 7  | 3  | --     | --       |
| CakTC34846 | Ca(ICC2/PI489777)SNP_13893 | 500  | T | C | 3  | 4  | Flower | bud      |
| CakTC42322 | Ca(ICC2/PI489777)SNP_13894 | 1034 | T | C | 5  | 4  | --     | --       |
|            | Ca(ICC2/PI489777)SNP_13895 | 1644 | T | C | 4  | 5  | --     | --       |
|            | Ca(ICC2/PI489777)SNP_13896 | 1812 | G | A | 3  | 4  | --     | --       |
| CakTC35609 | Ca(ICC2/PI489777)SNP_13897 | 196  | A | G | 5  | 5  | --     | --       |
|            | Ca(ICC2/PI489777)SNP_13898 | 418  | C | A | 9  | 4  | --     | --       |
|            | Ca(ICC2/PI489777)SNP_13899 | 654  | C | G | 11 | 3  | --     | --       |
|            | Ca(ICC2/PI489777)SNP_13900 | 762  | G | A | 10 | 3  | --     | --       |
|            | Ca(ICC2/PI489777)SNP_13901 | 767  | C | G | 11 | 3  | --     | --       |
|            | Ca(ICC2/PI489777)SNP_13902 | 2460 | A | T | 12 | 5  | --     | --       |
|            | Ca(ICC2/PI489777)SNP_13903 | 2917 | G | C | 10 | 9  | --     | --       |
|            | Ca(ICC2/PI489777)SNP_13904 | 2941 | G | T | 10 | 7  | --     | --       |
|            | Ca(ICC2/PI489777)SNP_13905 | 2957 | C | T | 10 | 8  | --     | --       |
| CakTC33006 | Ca(ICC2/PI489777)SNP_13906 | 588  | G | C | 11 | 20 | --     | --       |
|            | Ca(ICC2/PI489777)SNP_13907 | 657  | G | A | 11 | 15 | --     | --       |

|            |                            |      |   |   |    |    |    |       |
|------------|----------------------------|------|---|---|----|----|----|-------|
|            | Ca(ICC2/PI489777)SNP_13908 | 742  | G | C | 11 | 20 | -- | --    |
|            | Ca(ICC2/PI489777)SNP_13909 | 743  | C | T | 11 | 20 | -- | --    |
|            | Ca(ICC2/PI489777)SNP_13910 | 848  | T | C | 10 | 17 | -- | --    |
| CakTC43091 | Ca(ICC2/PI489777)SNP_13911 | 638  | T | C | 40 | 59 | -- | --    |
|            | Ca(ICC2/PI489777)SNP_13912 | 719  | A | G | 41 | 45 | -- | --    |
|            | Ca(ICC2/PI489777)SNP_13913 | 925  | T | C | 42 | 41 | -- | --    |
|            | Ca(ICC2/PI489777)SNP_13914 | 937  | C | A | 36 | 41 | -- | --    |
|            | Ca(ICC2/PI489777)SNP_13915 | 1013 | T | G | 28 | 33 | -- | --    |
|            | Ca(ICC2/PI489777)SNP_13916 | 1039 | A | T | 27 | 31 | -- | --    |
|            | Ca(ICC2/PI489777)SNP_13917 | 1084 | C | T | 34 | 35 | -- | --    |
|            | Ca(ICC2/PI489777)SNP_13918 | 1214 | T | C | 30 | 42 | -- | --    |
|            | Ca(ICC2/PI489777)SNP_13919 | 1367 | A | G | 36 | 36 | -- | --    |
|            | Ca(ICC2/PI489777)SNP_13920 | 1499 | A | T | 44 | 33 | -- | --    |
|            | Ca(ICC2/PI489777)SNP_13921 | 1553 | G | A | 48 | 33 | -- | --    |
| CakTC25086 | Ca(ICC2/PI489777)SNP_13922 | 103  | G | T | 7  | 8  | -- | --    |
|            | Ca(ICC2/PI489777)SNP_13923 | 1140 | A | G | 8  | 4  | -- | --    |
|            | Ca(ICC2/PI489777)SNP_13924 | 1152 | G | A | 7  | 3  | -- | --    |
|            | Ca(ICC2/PI489777)SNP_13925 | 1262 | G | A | 9  | 4  | -- | --    |
| CakTC37588 | Ca(ICC2/PI489777)SNP_13926 | 1018 | G | T | 8  | 14 | -- | --    |
| CakTC41430 | Ca(ICC2/PI489777)SNP_13927 | 539  | G | A | 25 | 14 | -- | --    |
| CakTC40125 | Ca(ICC2/PI489777)SNP_13928 | 618  | A | T | 11 | 14 | -- | --    |
|            | Ca(ICC2/PI489777)SNP_13929 | 891  | G | A | 14 | 17 | -- | --    |
|            | Ca(ICC2/PI489777)SNP_13930 | 1146 | A | C | 7  | 14 | -- | --    |
|            | Ca(ICC2/PI489777)SNP_13931 | 1218 | T | C | 5  | 9  | -- | --    |
| CakTC26334 | Ca(ICC2/PI489777)SNP_13932 | 613  | G | T | 15 | 7  | -- | --    |
|            | Ca(ICC2/PI489777)SNP_13933 | 1042 | A | T | 6  | 6  | -- | --    |
| CakTC41940 | Ca(ICC2/PI489777)SNP_13934 | 1420 | C | T | 7  | 6  | -- | --    |
| CakTC25854 | Ca(ICC2/PI489777)SNP_13935 | 433  | C | G | 6  | 4  | -- | Tify  |
| CakTC10724 | Ca(ICC2/PI489777)SNP_13936 | 2444 | A | G | 6  | 5  | -- | --    |
| CakTC28379 | Ca(ICC2/PI489777)SNP_13937 | 3269 | A | T | 31 | 12 | -- | --    |
| CakTC33390 | Ca(ICC2/PI489777)SNP_13938 | 20   | A | C | 3  | 16 | -- | CCAAT |
|            | Ca(ICC2/PI489777)SNP_13939 | 520  | C | G | 3  | 3  | -- | CCAAT |
| CakTC35262 | Ca(ICC2/PI489777)SNP_13940 | 678  | G | C | 9  | 14 | -- | --    |
|            | Ca(ICC2/PI489777)SNP_13941 | 694  | C | G | 5  | 13 | -- | --    |
|            | Ca(ICC2/PI489777)SNP_13942 | 734  | A | G | 7  | 10 | -- | --    |
|            | Ca(ICC2/PI489777)SNP_13943 | 792  | C | T | 10 | 7  | -- | --    |
|            | Ca(ICC2/PI489777)SNP_13944 | 810  | A | G | 10 | 9  | -- | --    |
|            | Ca(ICC2/PI489777)SNP_13945 | 843  | A | G | 10 | 8  | -- | --    |
|            | Ca(ICC2/PI489777)SNP_13946 | 3191 | T | C | 4  | 7  | -- | --    |
|            | Ca(ICC2/PI489777)SNP_13947 | 3280 | G | A | 3  | 6  | -- | --    |
| CakTC29327 | Ca(ICC2/PI489777)SNP_13948 | 370  | C | T | 9  | 3  | -- | --    |
|            | Ca(ICC2/PI489777)SNP_13949 | 433  | T | C | 7  | 3  | -- | --    |
|            | Ca(ICC2/PI489777)SNP_13950 | 750  | G | A | 13 | 5  | -- | --    |
|            | Ca(ICC2/PI489777)SNP_13951 | 929  | A | G | 11 | 4  | -- | --    |
|            | Ca(ICC2/PI489777)SNP_13952 | 1190 | C | G | 8  | 9  | -- | --    |
|            | Ca(ICC2/PI489777)SNP_13953 | 1429 | G | A | 6  | 4  | -- | --    |
| CakTC39643 | Ca(ICC2/PI489777)SNP_13954 | 38   | G | A | 6  | 6  | -- | --    |
|            | Ca(ICC2/PI489777)SNP_13955 | 49   | A | G | 10 | 9  | -- | --    |
|            | Ca(ICC2/PI489777)SNP_13956 | 53   | T | A | 10 | 9  | -- | --    |
|            | Ca(ICC2/PI489777)SNP_13957 | 89   | T | C | 8  | 10 | -- | --    |
|            | Ca(ICC2/PI489777)SNP_13958 | 132  | G | A | 14 | 12 | -- | --    |
|            | Ca(ICC2/PI489777)SNP_13959 | 179  | T | A | 15 | 15 | -- | --    |
|            | Ca(ICC2/PI489777)SNP_13960 | 216  | T | A | 20 | 18 | -- | --    |
|            | Ca(ICC2/PI489777)SNP_13961 | 500  | T | C | 15 | 15 | -- | --    |
|            | Ca(ICC2/PI489777)SNP_13962 | 763  | A | C | 22 | 15 | -- | --    |
|            | Ca(ICC2/PI489777)SNP_13963 | 785  | T | C | 24 | 15 | -- | --    |
|            | Ca(ICC2/PI489777)SNP_13964 | 874  | C | A | 26 | 15 | -- | --    |
| CakTC42057 | Ca(ICC2/PI489777)SNP_13965 | 231  | A | G | 11 | 3  | -- | --    |
|            | Ca(ICC2/PI489777)SNP_13966 | 646  | T | C | 32 | 19 | -- | --    |
|            | Ca(ICC2/PI489777)SNP_13967 | 1158 | A | C | 45 | 25 | -- | --    |
|            | Ca(ICC2/PI489777)SNP_13968 | 1376 | A | G | 38 | 35 | -- | --    |
|            | Ca(ICC2/PI489777)SNP_13969 | 1397 | T | C | 31 | 21 | -- | --    |
|            | Ca(ICC2/PI489777)SNP_13970 | 1819 | C | T | 14 | 9  | -- | --    |
| CakTC42412 | Ca(ICC2/PI489777)SNP_13971 | 171  | A | G | 19 | 7  | -- | --    |
|            | Ca(ICC2/PI489777)SNP_13972 | 702  | T | C | 46 | 19 | -- | --    |
| CakTC07476 | Ca(ICC2/PI489777)SNP_13973 | 976  | C | G | 3  | 7  | -- | C3H   |
|            | Ca(ICC2/PI489777)SNP_13974 | 989  | A | G | 4  | 9  | -- | C3H   |
|            | Ca(ICC2/PI489777)SNP_13975 | 1453 | T | C | 15 | 9  | -- | C3H   |
|            | Ca(ICC2/PI489777)SNP_13976 | 1488 | A | G | 14 | 9  | -- | C3H   |
| CakTC36427 | Ca(ICC2/PI489777)SNP_13977 | 2487 | A | G | 20 | 6  | -- | --    |
| CakTC27288 | Ca(ICC2/PI489777)SNP_13978 | 1865 | T | G | 8  | 5  | -- | --    |
|            | Ca(ICC2/PI489777)SNP_13979 | 2065 | G | A | 9  | 5  | -- | --    |
|            | Ca(ICC2/PI489777)SNP_13980 | 2071 | G | A | 8  | 4  | -- | --    |
| CakTC30001 | Ca(ICC2/PI489777)SNP_13981 | 389  | C | G | 7  | 5  | -- | --    |

|            |                            |      |   |   |    |    |    |    |
|------------|----------------------------|------|---|---|----|----|----|----|
|            | Ca(ICC2/PI489777)SNP_13982 | 3500 | C | A | 12 | 8  | -- | -- |
| CakTC39781 | Ca(ICC2/PI489777)SNP_13983 | 127  | C | T | 6  | 4  | -- | -- |
|            | Ca(ICC2/PI489777)SNP_13984 | 269  | G | A | 6  | 4  | -- | -- |
|            | Ca(ICC2/PI489777)SNP_13985 | 325  | G | T | 7  | 5  | -- | -- |
|            | Ca(ICC2/PI489777)SNP_13986 | 552  | A | C | 8  | 4  | -- | -- |
| CakTC37880 | Ca(ICC2/PI489777)SNP_13987 | 370  | G | A | 5  | 7  | -- | -- |
| CakTC26848 | Ca(ICC2/PI489777)SNP_13988 | 28   | C | T | 3  | 7  | -- | -- |
|            | Ca(ICC2/PI489777)SNP_13989 | 143  | A | G | 7  | 10 | -- | -- |
|            | Ca(ICC2/PI489777)SNP_13990 | 150  | T | C | 7  | 10 | -- | -- |
|            | Ca(ICC2/PI489777)SNP_13991 | 198  | C | A | 11 | 12 | -- | -- |
|            | Ca(ICC2/PI489777)SNP_13992 | 281  | G | A | 18 | 20 | -- | -- |
|            | Ca(ICC2/PI489777)SNP_13993 | 786  | T | G | 29 | 22 | -- | -- |
|            | Ca(ICC2/PI489777)SNP_13994 | 950  | A | T | 3  | 10 | -- | -- |
| CakTC31594 | Ca(ICC2/PI489777)SNP_13995 | 926  | C | T | 11 | 10 | -- | -- |
|            | Ca(ICC2/PI489777)SNP_13996 | 1173 | C | A | 9  | 10 | -- | -- |
|            | Ca(ICC2/PI489777)SNP_13997 | 1325 | C | T | 9  | 14 | -- | -- |
|            | Ca(ICC2/PI489777)SNP_13998 | 1370 | C | T | 10 | 16 | -- | -- |
|            | Ca(ICC2/PI489777)SNP_13999 | 1494 | T | A | 14 | 21 | -- | -- |
|            | Ca(ICC2/PI489777)SNP_14000 | 1505 | C | A | 13 | 20 | -- | -- |
|            | Ca(ICC2/PI489777)SNP_14001 | 1609 | G | A | 11 | 18 | -- | -- |
|            | Ca(ICC2/PI489777)SNP_14002 | 2146 | G | T | 12 | 12 | -- | -- |
|            | Ca(ICC2/PI489777)SNP_14003 | 2220 | C | A | 9  | 11 | -- | -- |
|            | Ca(ICC2/PI489777)SNP_14004 | 2264 | T | C | 13 | 14 | -- | -- |
|            | Ca(ICC2/PI489777)SNP_14005 | 2507 | A | G | 14 | 8  | -- | -- |
| CakTC39658 | Ca(ICC2/PI489777)SNP_14006 | 481  | T | C | 5  | 3  | -- | -- |
|            | Ca(ICC2/PI489777)SNP_14007 | 661  | G | A | 4  | 4  | -- | -- |
| CakTC29369 | Ca(ICC2/PI489777)SNP_14008 | 112  | T | G | 17 | 18 | -- | -- |
|            | Ca(ICC2/PI489777)SNP_14009 | 660  | C | T | 72 | 51 | -- | -- |
|            | Ca(ICC2/PI489777)SNP_14010 | 663  | C | G | 75 | 40 | -- | -- |
|            | Ca(ICC2/PI489777)SNP_14011 | 675  | C | T | 74 | 57 | -- | -- |
|            | Ca(ICC2/PI489777)SNP_14012 | 741  | G | A | 82 | 61 | -- | -- |
|            | Ca(ICC2/PI489777)SNP_14013 | 946  | T | G | 86 | 55 | -- | -- |
|            | Ca(ICC2/PI489777)SNP_14014 | 1115 | G | C | 46 | 34 | -- | -- |
|            | Ca(ICC2/PI489777)SNP_14015 | 1427 | G | A | 30 | 22 | -- | -- |
|            | Ca(ICC2/PI489777)SNP_14016 | 1720 | G | C | 26 | 23 | -- | -- |
|            | Ca(ICC2/PI489777)SNP_14017 | 1762 | C | G | 21 | 17 | -- | -- |
|            | Ca(ICC2/PI489777)SNP_14018 | 1767 | A | G | 17 | 17 | -- | -- |
| CakTC22669 | Ca(ICC2/PI489777)SNP_14019 | 490  | T | C | 5  | 5  | -- | -- |
|            | Ca(ICC2/PI489777)SNP_14020 | 495  | C | A | 5  | 4  | -- | -- |
|            | Ca(ICC2/PI489777)SNP_14021 | 500  | C | T | 5  | 4  | -- | -- |
|            | Ca(ICC2/PI489777)SNP_14022 | 609  | G | A | 11 | 7  | -- | -- |
|            | Ca(ICC2/PI489777)SNP_14023 | 677  | G | T | 12 | 5  | -- | -- |
| CakTC30728 | Ca(ICC2/PI489777)SNP_14024 | 1023 | C | T | 5  | 4  | -- | -- |
| CakTC25154 | Ca(ICC2/PI489777)SNP_14025 | 116  | G | C | 4  | 4  | -- | -- |
|            | Ca(ICC2/PI489777)SNP_14026 | 411  | T | C | 44 | 30 | -- | -- |
|            | Ca(ICC2/PI489777)SNP_14027 | 1829 | A | G | 5  | 3  | -- | -- |
| CakTC40574 | Ca(ICC2/PI489777)SNP_14028 | 341  | G | A | 3  | 7  | -- | -- |
|            | Ca(ICC2/PI489777)SNP_14029 | 1461 | A | C | 12 | 13 | -- | -- |
| CakTC39515 | Ca(ICC2/PI489777)SNP_14030 | 90   | C | G | 7  | 7  | -- | -- |
|            | Ca(ICC2/PI489777)SNP_14031 | 119  | C | A | 8  | 7  | -- | -- |
|            | Ca(ICC2/PI489777)SNP_14032 | 701  | G | A | 13 | 6  | -- | -- |
|            | Ca(ICC2/PI489777)SNP_14033 | 912  | G | C | 10 | 6  | -- | -- |
|            | Ca(ICC2/PI489777)SNP_14034 | 947  | C | G | 11 | 6  | -- | -- |
|            | Ca(ICC2/PI489777)SNP_14035 | 951  | A | G | 11 | 5  | -- | -- |
| CakTC29780 | Ca(ICC2/PI489777)SNP_14036 | 443  | G | A | 19 | 7  | -- | -- |
|            | Ca(ICC2/PI489777)SNP_14037 | 457  | G | T | 12 | 7  | -- | -- |
|            | Ca(ICC2/PI489777)SNP_14038 | 509  | G | C | 15 | 6  | -- | -- |
|            | Ca(ICC2/PI489777)SNP_14039 | 659  | A | G | 7  | 7  | -- | -- |
|            | Ca(ICC2/PI489777)SNP_14040 | 896  | A | C | 3  | 4  | -- | -- |
|            | Ca(ICC2/PI489777)SNP_14041 | 904  | G | A | 3  | 4  | -- | -- |
| CakTC33404 | Ca(ICC2/PI489777)SNP_14042 | 751  | T | C | 11 | 9  | -- | -- |
|            | Ca(ICC2/PI489777)SNP_14043 | 964  | C | T | 8  | 10 | -- | -- |
|            | Ca(ICC2/PI489777)SNP_14044 | 1015 | T | C | 9  | 10 | -- | -- |
|            | Ca(ICC2/PI489777)SNP_14045 | 1021 | C | T | 9  | 10 | -- | -- |
|            | Ca(ICC2/PI489777)SNP_14046 | 1201 | T | C | 6  | 9  | -- | -- |
| CakTC26142 | Ca(ICC2/PI489777)SNP_14047 | 426  | T | C | 28 | 17 | -- | -- |
|            | Ca(ICC2/PI489777)SNP_14048 | 2296 | T | C | 14 | 16 | -- | -- |
|            | Ca(ICC2/PI489777)SNP_14049 | 2632 | C | T | 25 | 22 | -- | -- |
|            | Ca(ICC2/PI489777)SNP_14050 | 2634 | A | G | 26 | 22 | -- | -- |
| CakTC23926 | Ca(ICC2/PI489777)SNP_14051 | 979  | G | A | 13 | 4  | -- | -- |
|            | Ca(ICC2/PI489777)SNP_14052 | 1017 | G | A | 15 | 4  | -- | -- |
|            | Ca(ICC2/PI489777)SNP_14053 | 1272 | G | T | 19 | 5  | -- | -- |
|            | Ca(ICC2/PI489777)SNP_14054 | 1512 | C | T | 11 | 5  | -- | -- |
| CakTC25645 | Ca(ICC2/PI489777)SNP_14055 | 552  | G | C | 62 | 31 | -- | -- |

|            |                            |      |   |   |    |    |           |     |
|------------|----------------------------|------|---|---|----|----|-----------|-----|
|            | Ca(ICC2/PI489777)SNP_14056 | 770  | T | C | 47 | 25 | --        | --  |
|            | Ca(ICC2/PI489777)SNP_14057 | 804  | T | C | 51 | 27 | --        | --  |
|            | Ca(ICC2/PI489777)SNP_14058 | 886  | T | C | 41 | 28 | --        | --  |
| CakTC42577 | Ca(ICC2/PI489777)SNP_14059 | 316  | C | T | 8  | 5  | --        | --  |
|            | Ca(ICC2/PI489777)SNP_14060 | 318  | C | T | 9  | 7  | --        | --  |
|            | Ca(ICC2/PI489777)SNP_14061 | 699  | G | A | 19 | 16 | --        | --  |
| CakTC30375 | Ca(ICC2/PI489777)SNP_14062 | 2890 | T | C | 6  | 6  | --        | TPR |
| CakTC14811 | Ca(ICC2/PI489777)SNP_14063 | 418  | G | A | 3  | 9  | --        | --  |
|            | Ca(ICC2/PI489777)SNP_14064 | 561  | C | T | 3  | 8  | --        | --  |
|            | Ca(ICC2/PI489777)SNP_14065 | 579  | T | A | 3  | 6  | --        | --  |
|            | Ca(ICC2/PI489777)SNP_14066 | 621  | A | G | 3  | 7  | --        | --  |
| CakTC32729 | Ca(ICC2/PI489777)SNP_14067 | 915  | A | G | 17 | 20 | --        | --  |
|            | Ca(ICC2/PI489777)SNP_14068 | 1029 | C | A | 16 | 21 | --        | --  |
|            | Ca(ICC2/PI489777)SNP_14069 | 1848 | A | G | 10 | 12 | --        | --  |
| CakTC30996 | Ca(ICC2/PI489777)SNP_14070 | 698  | A | G | 8  | 4  | --        | --  |
| CakTC41672 | Ca(ICC2/PI489777)SNP_14071 | 501  | T | C | 15 | 3  | --        | --  |
|            | Ca(ICC2/PI489777)SNP_14072 | 645  | T | A | 11 | 8  | --        | --  |
|            | Ca(ICC2/PI489777)SNP_14073 | 660  | A | G | 11 | 8  | --        | --  |
|            | Ca(ICC2/PI489777)SNP_14074 | 765  | T | A | 10 | 7  | --        | --  |
|            | Ca(ICC2/PI489777)SNP_14075 | 1407 | G | A | 15 | 9  | --        | --  |
|            | Ca(ICC2/PI489777)SNP_14076 | 1464 | G | T | 9  | 7  | --        | --  |
|            | Ca(ICC2/PI489777)SNP_14077 | 1809 | A | G | 6  | 4  | --        | --  |
|            | Ca(ICC2/PI489777)SNP_14078 | 1872 | G | A | 6  | 7  | --        | --  |
|            | Ca(ICC2/PI489777)SNP_14079 | 1902 | T | A | 6  | 7  | --        | --  |
|            | Ca(ICC2/PI489777)SNP_14080 | 1905 | C | T | 8  | 7  | --        | --  |
|            | Ca(ICC2/PI489777)SNP_14081 | 2010 | T | C | 7  | 8  | --        | --  |
|            | Ca(ICC2/PI489777)SNP_14082 | 2189 | T | C | 9  | 8  | --        | --  |
| CakTC11237 | Ca(ICC2/PI489777)SNP_14083 | 214  | C | T | 3  | 3  | --        | --  |
|            | Ca(ICC2/PI489777)SNP_14084 | 257  | C | T | 3  | 4  | --        | --  |
|            | Ca(ICC2/PI489777)SNP_14085 | 293  | T | G | 3  | 4  | --        | --  |
|            | Ca(ICC2/PI489777)SNP_14086 | 327  | A | G | 3  | 4  | --        | --  |
| CakTC42567 | Ca(ICC2/PI489777)SNP_14087 | 850  | T | C | 7  | 4  | --        | --  |
|            | Ca(ICC2/PI489777)SNP_14088 | 1387 | C | T | 7  | 7  | --        | --  |
| CakTC24316 | Ca(ICC2/PI489777)SNP_14089 | 1805 | A | G | 5  | 3  | --        | --  |
|            | Ca(ICC2/PI489777)SNP_14090 | 1812 | G | C | 5  | 3  | --        | --  |
| CakTC40717 | Ca(ICC2/PI489777)SNP_14091 | 257  | G | A | 5  | 3  | Flower    | bud |
| CakTC27657 | Ca(ICC2/PI489777)SNP_14092 | 841  | A | G | 45 | 15 | --        | --  |
| CakTC24956 | Ca(ICC2/PI489777)SNP_14093 | 954  | T | C | 13 | 3  | --        | --  |
|            | Ca(ICC2/PI489777)SNP_14094 | 1024 | A | G | 19 | 5  | --        | --  |
|            | Ca(ICC2/PI489777)SNP_14095 | 1135 | G | C | 16 | 6  | --        | --  |
|            | Ca(ICC2/PI489777)SNP_14096 | 1268 | G | A | 9  | 4  | --        | --  |
|            | Ca(ICC2/PI489777)SNP_14097 | 1272 | A | T | 10 | 3  | --        | --  |
|            | Ca(ICC2/PI489777)SNP_14098 | 1358 | A | G | 5  | 3  | --        | --  |
|            | Ca(ICC2/PI489777)SNP_14099 | 1509 | G | T | 5  | 3  | --        | --  |
| CakTC01457 | Ca(ICC2/PI489777)SNP_14100 | 728  | A | T | 4  | 8  | --        | --  |
|            | Ca(ICC2/PI489777)SNP_14101 | 800  | A | T | 4  | 8  | --        | --  |
|            | Ca(ICC2/PI489777)SNP_14102 | 2888 | C | T | 3  | 3  | --        | --  |
| CakTC28383 | Ca(ICC2/PI489777)SNP_14103 | 927  | T | C | 9  | 8  | --        | --  |
|            | Ca(ICC2/PI489777)SNP_14104 | 1100 | G | C | 3  | 8  | --        | --  |
|            | Ca(ICC2/PI489777)SNP_14105 | 1134 | A | G | 3  | 9  | --        | --  |
|            | Ca(ICC2/PI489777)SNP_14106 | 1137 | G | A | 3  | 10 | --        | --  |
|            | Ca(ICC2/PI489777)SNP_14107 | 1182 | A | T | 3  | 10 | --        | --  |
|            | Ca(ICC2/PI489777)SNP_14108 | 2151 | A | G | 9  | 13 | --        | --  |
|            | Ca(ICC2/PI489777)SNP_14109 | 2196 | G | T | 10 | 13 | --        | --  |
|            | Ca(ICC2/PI489777)SNP_14110 | 2206 | C | T | 10 | 12 | --        | --  |
|            | Ca(ICC2/PI489777)SNP_14111 | 2222 | G | T | 12 | 13 | --        | --  |
|            | Ca(ICC2/PI489777)SNP_14112 | 2224 | A | T | 12 | 13 | --        | --  |
|            | Ca(ICC2/PI489777)SNP_14113 | 2244 | C | G | 13 | 13 | --        | --  |
|            | Ca(ICC2/PI489777)SNP_14114 | 2259 | G | A | 12 | 10 | --        | --  |
|            | Ca(ICC2/PI489777)SNP_14115 | 3084 | C | T | 7  | 10 | --        | --  |
|            | Ca(ICC2/PI489777)SNP_14116 | 3173 | T | C | 11 | 14 | --        | --  |
|            | Ca(ICC2/PI489777)SNP_14117 | 3237 | G | A | 13 | 18 | --        | --  |
|            | Ca(ICC2/PI489777)SNP_14118 | 3331 | G | A | 15 | 19 | --        | --  |
|            | Ca(ICC2/PI489777)SNP_14119 | 3982 | G | C | 10 | 11 | --        | --  |
|            | Ca(ICC2/PI489777)SNP_14120 | 4067 | C | T | 10 | 13 | --        | --  |
| CakTC42865 | Ca(ICC2/PI489777)SNP_14121 | 359  | C | A | 69 | 59 | --        | --  |
| CakTC22484 | Ca(ICC2/PI489777)SNP_14122 | 1222 | G | C | 19 | 13 | Young_pod | --  |
|            | Ca(ICC2/PI489777)SNP_14123 | 1609 | A | T | 25 | 26 | Young_pod | --  |
|            | Ca(ICC2/PI489777)SNP_14124 | 1999 | G | A | 3  | 3  | Young_pod | --  |
| CakTC29885 | Ca(ICC2/PI489777)SNP_14125 | 230  | C | T | 21 | 14 | --        | --  |
|            | Ca(ICC2/PI489777)SNP_14126 | 242  | A | G | 19 | 13 | --        | --  |
|            | Ca(ICC2/PI489777)SNP_14127 | 2543 | G | A | 37 | 28 | --        | --  |
|            | Ca(ICC2/PI489777)SNP_14128 | 3386 | A | G | 30 | 27 | --        | --  |
| CakTC09805 | Ca(ICC2/PI489777)SNP_14129 | 2218 | T | C | 5  | 3  | --        | --  |

|            |                            |      |   |   |     |    |        |             |
|------------|----------------------------|------|---|---|-----|----|--------|-------------|
|            | Ca(ICC2/PI489777)SNP_14130 | 2261 | G | T | 5   | 3  | --     | --          |
| CakTC42571 | Ca(ICC2/PI489777)SNP_14131 | 466  | G | T | 47  | 36 | --     | --          |
|            | Ca(ICC2/PI489777)SNP_14132 | 604  | G | A | 79  | 35 | --     | --          |
| CakTC28275 | Ca(ICC2/PI489777)SNP_14133 | 284  | T | C | 3   | 8  | --     | Bromodomain |
|            | Ca(ICC2/PI489777)SNP_14134 | 3004 | T | A | 7   | 5  | --     | Bromodomain |
|            | Ca(ICC2/PI489777)SNP_14135 | 4161 | A | G | 5   | 10 | --     | Bromodomain |
|            | Ca(ICC2/PI489777)SNP_14136 | 4227 | A | C | 5   | 8  | --     | Bromodomain |
|            | Ca(ICC2/PI489777)SNP_14137 | 4416 | C | T | 6   | 6  | --     | Bromodomain |
|            | Ca(ICC2/PI489777)SNP_14138 | 4425 | T | C | 6   | 5  | --     | Bromodomain |
|            | Ca(ICC2/PI489777)SNP_14139 | 5592 | G | A | 15  | 8  | --     | Bromodomain |
| CakTC23613 | Ca(ICC2/PI489777)SNP_14140 | 547  | C | T | 9   | 6  | --     | --          |
|            | Ca(ICC2/PI489777)SNP_14141 | 1214 | G | T | 5   | 3  | --     | --          |
| CakTC43100 | Ca(ICC2/PI489777)SNP_14142 | 877  | A | T | 35  | 11 | --     | --          |
|            | Ca(ICC2/PI489777)SNP_14143 | 1265 | A | G | 4   | 4  | --     | --          |
| CakTC38089 | Ca(ICC2/PI489777)SNP_14144 | 462  | T | G | 7   | 5  | --     | --          |
| CakTC23511 | Ca(ICC2/PI489777)SNP_14145 | 835  | G | T | 229 | 60 | --     | --          |
| CakTC29862 | Ca(ICC2/PI489777)SNP_14146 | 291  | G | A | 6   | 7  | --     | --          |
|            | Ca(ICC2/PI489777)SNP_14147 | 1056 | G | A | 6   | 8  | --     | --          |
|            | Ca(ICC2/PI489777)SNP_14148 | 2053 | T | A | 28  | 6  | --     | --          |
| CakTC30706 | Ca(ICC2/PI489777)SNP_14149 | 771  | A | G | 7   | 3  | --     | --          |
| CakTC41769 | Ca(ICC2/PI489777)SNP_14150 | 422  | A | G | 4   | 12 | --     | AP2-EREBP   |
|            | Ca(ICC2/PI489777)SNP_14151 | 437  | G | A | 4   | 11 | --     | AP2-EREBP   |
| CakTC42100 | Ca(ICC2/PI489777)SNP_14152 | 983  | T | G | 9   | 9  | --     | --          |
|            | Ca(ICC2/PI489777)SNP_14153 | 1335 | T | A | 21  | 4  | --     | --          |
|            | Ca(ICC2/PI489777)SNP_14154 | 1480 | C | T | 15  | 4  | --     | --          |
| CakTC10259 | Ca(ICC2/PI489777)SNP_14155 | 3038 | C | G | 8   | 7  | --     | --          |
|            | Ca(ICC2/PI489777)SNP_14156 | 3049 | G | A | 8   | 7  | --     | --          |
| CakTC38802 | Ca(ICC2/PI489777)SNP_14157 | 699  | G | A | 14  | 14 | Flower | bud         |
|            | Ca(ICC2/PI489777)SNP_14158 | 840  | T | C | 8   | 12 | Flower | bud         |
| CakTC23014 | Ca(ICC2/PI489777)SNP_14159 | 1389 | G | T | 7   | 4  | --     | --          |
|            | Ca(ICC2/PI489777)SNP_14160 | 1466 | T | C | 9   | 5  | --     | --          |
|            | Ca(ICC2/PI489777)SNP_14161 | 1534 | G | A | 8   | 4  | --     | --          |
| CakTC27710 | Ca(ICC2/PI489777)SNP_14162 | 1496 | A | G | 3   | 3  | --     | --          |
|            | Ca(ICC2/PI489777)SNP_14163 | 1886 | C | A | 4   | 4  | --     | --          |
| CakTC30016 | Ca(ICC2/PI489777)SNP_14164 | 1954 | C | T | 11  | 6  | --     | --          |
| CakTC31686 | Ca(ICC2/PI489777)SNP_14165 | 293  | C | T | 15  | 3  | --     | --          |
|            | Ca(ICC2/PI489777)SNP_14166 | 416  | T | C | 23  | 4  | --     | --          |
|            | Ca(ICC2/PI489777)SNP_14167 | 443  | T | A | 25  | 4  | --     | --          |
|            | Ca(ICC2/PI489777)SNP_14168 | 449  | G | T | 26  | 4  | --     | --          |
|            | Ca(ICC2/PI489777)SNP_14169 | 506  | C | T | 25  | 4  | --     | --          |
|            | Ca(ICC2/PI489777)SNP_14170 | 522  | A | G | 23  | 4  | --     | --          |
| CakTC42010 | Ca(ICC2/PI489777)SNP_14171 | 336  | G | T | 13  | 5  | --     | --          |
|            | Ca(ICC2/PI489777)SNP_14172 | 536  | T | C | 13  | 16 | --     | --          |
|            | Ca(ICC2/PI489777)SNP_14173 | 1005 | C | T | 19  | 10 | --     | --          |
|            | Ca(ICC2/PI489777)SNP_14174 | 1545 | A | G | 12  | 17 | --     | --          |
| CakTC02652 | Ca(ICC2/PI489777)SNP_14175 | 10   | T | C | 4   | 3  | --     | --          |
|            | Ca(ICC2/PI489777)SNP_14176 | 210  | A | G | 6   | 4  | --     | --          |
| CakTC38809 | Ca(ICC2/PI489777)SNP_14177 | 264  | T | C | 9   | 12 | --     | --          |
|            | Ca(ICC2/PI489777)SNP_14178 | 306  | G | A | 6   | 14 | --     | --          |
|            | Ca(ICC2/PI489777)SNP_14179 | 897  | C | T | 7   | 4  | --     | --          |
|            | Ca(ICC2/PI489777)SNP_14180 | 1221 | A | C | 8   | 10 | --     | --          |
|            | Ca(ICC2/PI489777)SNP_14181 | 1301 | C | T | 10  | 9  | --     | --          |
|            | Ca(ICC2/PI489777)SNP_14182 | 1309 | T | C | 9   | 8  | --     | --          |
|            | Ca(ICC2/PI489777)SNP_14183 | 1351 | G | C | 8   | 7  | --     | --          |
| CakTC39368 | Ca(ICC2/PI489777)SNP_14184 | 165  | G | C | 4   | 14 | --     | --          |
|            | Ca(ICC2/PI489777)SNP_14185 | 265  | C | G | 6   | 15 | --     | --          |
|            | Ca(ICC2/PI489777)SNP_14186 | 557  | T | G | 9   | 10 | --     | --          |
|            | Ca(ICC2/PI489777)SNP_14187 | 701  | T | C | 13  | 11 | --     | --          |
|            | Ca(ICC2/PI489777)SNP_14188 | 929  | C | T | 16  | 5  | --     | --          |
|            | Ca(ICC2/PI489777)SNP_14189 | 1143 | C | T | 27  | 6  | --     | --          |
|            | Ca(ICC2/PI489777)SNP_14190 | 1277 | A | G | 17  | 4  | --     | --          |
|            | Ca(ICC2/PI489777)SNP_14191 | 1386 | T | C | 11  | 4  | --     | --          |
| CakTC25730 | Ca(ICC2/PI489777)SNP_14192 | 380  | G | T | 13  | 5  | --     | --          |
| CakTC26841 | Ca(ICC2/PI489777)SNP_14193 | 528  | T | A | 9   | 4  | --     | --          |
|            | Ca(ICC2/PI489777)SNP_14194 | 632  | G | A | 9   | 4  | --     | --          |
|            | Ca(ICC2/PI489777)SNP_14195 | 635  | A | G | 11  | 4  | --     | --          |
|            | Ca(ICC2/PI489777)SNP_14196 | 750  | T | G | 8   | 4  | --     | --          |
| CakTC34532 | Ca(ICC2/PI489777)SNP_14197 | 336  | T | C | 3   | 4  | --     | --          |
| CakTC38105 | Ca(ICC2/PI489777)SNP_14198 | 359  | C | T | 23  | 11 | --     | --          |
|            | Ca(ICC2/PI489777)SNP_14199 | 527  | C | T | 11  | 4  | --     | --          |
|            | Ca(ICC2/PI489777)SNP_14200 | 560  | T | A | 4   | 6  | --     | --          |
|            | Ca(ICC2/PI489777)SNP_14201 | 1000 | G | C | 10  | 7  | --     | --          |
| CakTC24792 | Ca(ICC2/PI489777)SNP_14202 | 500  | T | G | 17  | 8  | --     | --          |
|            | Ca(ICC2/PI489777)SNP_14203 | 698  | G | A | 21  | 10 | --     | --          |



|            |                            |      |   |   |     |     |    |      |
|------------|----------------------------|------|---|---|-----|-----|----|------|
|            | Ca(ICC2/PI489777)SNP_14204 | 797  | T | C | 15  | 7   | -- | --   |
|            | Ca(ICC2/PI489777)SNP_14205 | 1202 | A | G | 13  | 9   | -- | --   |
| CakTC29970 | Ca(ICC2/PI489777)SNP_14206 | 422  | G | A | 20  | 13  | -- | --   |
|            | Ca(ICC2/PI489777)SNP_14207 | 520  | G | A | 20  | 9   | -- | --   |
|            | Ca(ICC2/PI489777)SNP_14208 | 759  | T | C | 15  | 3   | -- | --   |
|            | Ca(ICC2/PI489777)SNP_14209 | 1030 | C | T | 9   | 4   | -- | --   |
|            | Ca(ICC2/PI489777)SNP_14210 | 1930 | T | C | 11  | 7   | -- | --   |
|            | Ca(ICC2/PI489777)SNP_14211 | 2266 | C | T | 12  | 11  | -- | --   |
|            | Ca(ICC2/PI489777)SNP_14212 | 2437 | T | C | 12  | 7   | -- | --   |
|            | Ca(ICC2/PI489777)SNP_14213 | 2536 | A | C | 10  | 6   | -- | --   |
|            | Ca(ICC2/PI489777)SNP_14214 | 2797 | G | C | 10  | 4   | -- | --   |
|            | Ca(ICC2/PI489777)SNP_14215 | 3436 | A | G | 8   | 5   | -- | --   |
|            | Ca(ICC2/PI489777)SNP_14216 | 3439 | G | A | 7   | 5   | -- | --   |
|            | Ca(ICC2/PI489777)SNP_14217 | 3935 | G | C | 14  | 3   | -- | --   |
|            | Ca(ICC2/PI489777)SNP_14218 | 3948 | C | G | 13  | 3   | -- | --   |
|            | Ca(ICC2/PI489777)SNP_14219 | 3950 | G | A | 12  | 3   | -- | --   |
| CakTC41579 | Ca(ICC2/PI489777)SNP_14220 | 222  | T | C | 30  | 17  | -- | --   |
|            | Ca(ICC2/PI489777)SNP_14221 | 498  | G | A | 43  | 15  | -- | --   |
|            | Ca(ICC2/PI489777)SNP_14222 | 516  | A | G | 44  | 16  | -- | --   |
|            | Ca(ICC2/PI489777)SNP_14223 | 531  | C | T | 46  | 14  | -- | --   |
|            | Ca(ICC2/PI489777)SNP_14224 | 690  | C | T | 52  | 12  | -- | --   |
|            | Ca(ICC2/PI489777)SNP_14225 | 1095 | G | A | 59  | 20  | -- | --   |
|            | Ca(ICC2/PI489777)SNP_14226 | 2007 | A | T | 34  | 11  | -- | --   |
| CakTC34515 | Ca(ICC2/PI489777)SNP_14227 | 677  | T | C | 3   | 8   | -- | --   |
|            | Ca(ICC2/PI489777)SNP_14228 | 699  | T | C | 3   | 7   | -- | --   |
|            | Ca(ICC2/PI489777)SNP_14229 | 749  | T | C | 3   | 9   | -- | --   |
|            | Ca(ICC2/PI489777)SNP_14230 | 879  | T | C | 4   | 5   | -- | --   |
|            | Ca(ICC2/PI489777)SNP_14231 | 880  | C | T | 4   | 5   | -- | --   |
|            | Ca(ICC2/PI489777)SNP_14232 | 897  | T | C | 4   | 5   | -- | --   |
|            | Ca(ICC2/PI489777)SNP_14233 | 994  | A | G | 3   | 3   | -- | --   |
|            | Ca(ICC2/PI489777)SNP_14234 | 996  | T | C | 3   | 3   | -- | --   |
|            | Ca(ICC2/PI489777)SNP_14235 | 1019 | A | G | 3   | 3   | -- | --   |
| CakTC40192 | Ca(ICC2/PI489777)SNP_14236 | 1566 | C | G | 9   | 15  | -- | --   |
|            | Ca(ICC2/PI489777)SNP_14237 | 1567 | T | G | 9   | 15  | -- | --   |
| CakTC28583 | Ca(ICC2/PI489777)SNP_14238 | 1219 | T | G | 6   | 7   | -- | --   |
|            | Ca(ICC2/PI489777)SNP_14239 | 1299 | G | C | 7   | 7   | -- | --   |
| CakTC35356 | Ca(ICC2/PI489777)SNP_14240 | 254  | C | G | 14  | 10  | -- | --   |
|            | Ca(ICC2/PI489777)SNP_14241 | 886  | G | A | 54  | 17  | -- | --   |
|            | Ca(ICC2/PI489777)SNP_14242 | 1360 | G | A | 56  | 20  | -- | --   |
|            | Ca(ICC2/PI489777)SNP_14243 | 3325 | C | T | 31  | 9   | -- | --   |
|            | Ca(ICC2/PI489777)SNP_14244 | 4106 | C | G | 40  | 16  | -- | --   |
| CakTC41669 | Ca(ICC2/PI489777)SNP_14245 | 2055 | C | G | 8   | 6   | -- | --   |
| CakTC37936 | Ca(ICC2/PI489777)SNP_14246 | 115  | C | T | 5   | 10  | -- | --   |
|            | Ca(ICC2/PI489777)SNP_14247 | 538  | G | A | 7   | 6   | -- | --   |
| CakTC42811 | Ca(ICC2/PI489777)SNP_14248 | 255  | T | C | 4   | 4   | -- | --   |
|            | Ca(ICC2/PI489777)SNP_14249 | 929  | T | C | 29  | 12  | -- | --   |
|            | Ca(ICC2/PI489777)SNP_14250 | 1006 | G | A | 28  | 18  | -- | --   |
|            | Ca(ICC2/PI489777)SNP_14251 | 1388 | T | C | 35  | 7   | -- | --   |
|            | Ca(ICC2/PI489777)SNP_14252 | 1790 | T | C | 30  | 8   | -- | --   |
| CakTC23509 | Ca(ICC2/PI489777)SNP_14253 | 253  | A | G | 95  | 136 | -- | --   |
|            | Ca(ICC2/PI489777)SNP_14254 | 768  | G | A | 290 | 191 | -- | --   |
| CakTC12385 | Ca(ICC2/PI489777)SNP_14255 | 7769 | T | C | 7   | 3   | -- | --   |
| CakTC33341 | Ca(ICC2/PI489777)SNP_14256 | 209  | T | C | 7   | 7   | -- | GRAS |
|            | Ca(ICC2/PI489777)SNP_14257 | 755  | C | G | 5   | 6   | -- | GRAS |
|            | Ca(ICC2/PI489777)SNP_14258 | 778  | A | G | 6   | 7   | -- | GRAS |
|            | Ca(ICC2/PI489777)SNP_14259 | 882  | G | A | 8   | 4   | -- | GRAS |
|            | Ca(ICC2/PI489777)SNP_14260 | 1358 | A | G | 7   | 3   | -- | GRAS |
|            | Ca(ICC2/PI489777)SNP_14261 | 1464 | G | A | 4   | 4   | -- | GRAS |
| CakTC37140 | Ca(ICC2/PI489777)SNP_14262 | 246  | C | T | 7   | 14  | -- | --   |
| CakTC27234 | Ca(ICC2/PI489777)SNP_14263 | 109  | T | C | 4   | 6   | -- | --   |
|            | Ca(ICC2/PI489777)SNP_14264 | 767  | C | T | 3   | 3   | -- | --   |
|            | Ca(ICC2/PI489777)SNP_14265 | 1497 | C | A | 6   | 5   | -- | --   |
| CakTC09678 | Ca(ICC2/PI489777)SNP_14266 | 348  | T | A | 50  | 40  | -- | --   |
| CakTC36289 | Ca(ICC2/PI489777)SNP_14267 | 90   | C | G | 18  | 4   | -- | C3H  |
|            | Ca(ICC2/PI489777)SNP_14268 | 226  | G | C | 19  | 5   | -- | C3H  |
|            | Ca(ICC2/PI489777)SNP_14269 | 239  | A | G | 15  | 5   | -- | C3H  |
|            | Ca(ICC2/PI489777)SNP_14270 | 253  | G | T | 17  | 4   | -- | C3H  |
|            | Ca(ICC2/PI489777)SNP_14271 | 575  | A | G | 9   | 9   | -- | C3H  |
|            | Ca(ICC2/PI489777)SNP_14272 | 796  | C | G | 12  | 3   | -- | C3H  |
|            | Ca(ICC2/PI489777)SNP_14273 | 800  | T | C | 13  | 3   | -- | C3H  |
|            | Ca(ICC2/PI489777)SNP_14274 | 879  | G | T | 9   | 3   | -- | C3H  |
|            | Ca(ICC2/PI489777)SNP_14275 | 923  | G | A | 9   | 7   | -- | C3H  |
|            | Ca(ICC2/PI489777)SNP_14276 | 1439 | G | A | 30  | 13  | -- | C3H  |
|            | Ca(ICC2/PI489777)SNP_14277 | 1485 | A | G | 36  | 12  | -- | C3H  |

|            |                            |      |   |   |     |     |      |     |
|------------|----------------------------|------|---|---|-----|-----|------|-----|
|            | Ca(ICC2/PI489777)SNP_14278 | 1667 | G | C | 35  | 15  | --   | C3H |
|            | Ca(ICC2/PI489777)SNP_14279 | 2119 | T | C | 22  | 11  | --   | C3H |
|            | Ca(ICC2/PI489777)SNP_14280 | 2292 | T | G | 27  | 18  | --   | C3H |
| CakTC03181 | Ca(ICC2/PI489777)SNP_14281 | 648  | C | A | 3   | 4   | Root | --  |
| CakTC32456 | Ca(ICC2/PI489777)SNP_14282 | 137  | A | T | 5   | 7   | --   | --  |
|            | Ca(ICC2/PI489777)SNP_14283 | 218  | C | T | 7   | 7   | --   | --  |
|            | Ca(ICC2/PI489777)SNP_14284 | 810  | T | C | 12  | 10  | --   | --  |
|            | Ca(ICC2/PI489777)SNP_14285 | 1498 | A | C | 13  | 5   | --   | --  |
| CakTC43201 | Ca(ICC2/PI489777)SNP_14286 | 554  | G | A | 6   | 3   | --   | --  |
|            | Ca(ICC2/PI489777)SNP_14287 | 618  | G | T | 3   | 3   | --   | --  |
| CakTC26456 | Ca(ICC2/PI489777)SNP_14288 | 31   | A | G | 5   | 5   | --   | --  |
|            | Ca(ICC2/PI489777)SNP_14289 | 153  | G | C | 35  | 18  | --   | --  |
|            | Ca(ICC2/PI489777)SNP_14290 | 944  | G | T | 21  | 9   | --   | --  |
| CakTC22781 | Ca(ICC2/PI489777)SNP_14291 | 449  | C | T | 498 | 196 | --   | --  |
|            | Ca(ICC2/PI489777)SNP_14292 | 542  | T | G | 311 | 150 | --   | --  |
|            | Ca(ICC2/PI489777)SNP_14293 | 596  | C | T | 159 | 101 | --   | --  |
| CakTC10133 | Ca(ICC2/PI489777)SNP_14294 | 174  | T | A | 18  | 5   | --   | --  |
|            | Ca(ICC2/PI489777)SNP_14295 | 206  | G | A | 17  | 5   | --   | --  |
|            | Ca(ICC2/PI489777)SNP_14296 | 443  | C | T | 16  | 7   | --   | --  |
|            | Ca(ICC2/PI489777)SNP_14297 | 1046 | A | G | 12  | 3   | --   | --  |
|            | Ca(ICC2/PI489777)SNP_14298 | 1081 | T | G | 4   | 3   | --   | --  |
| CakTC02937 | Ca(ICC2/PI489777)SNP_14299 | 124  | T | C | 4   | 4   | --   | --  |
|            | Ca(ICC2/PI489777)SNP_14300 | 520  | T | C | 6   | 3   | --   | --  |
| CakTC23609 | Ca(ICC2/PI489777)SNP_14301 | 162  | T | C | 9   | 11  | --   | --  |
|            | Ca(ICC2/PI489777)SNP_14302 | 236  | T | C | 16  | 20  | --   | --  |
|            | Ca(ICC2/PI489777)SNP_14303 | 342  | G | A | 29  | 23  | --   | --  |
|            | Ca(ICC2/PI489777)SNP_14304 | 415  | T | C | 19  | 22  | --   | --  |
|            | Ca(ICC2/PI489777)SNP_14305 | 798  | G | A | 14  | 8   | --   | --  |
|            | Ca(ICC2/PI489777)SNP_14306 | 1065 | C | T | 52  | 24  | --   | --  |
|            | Ca(ICC2/PI489777)SNP_14307 | 1077 | C | T | 49  | 21  | --   | --  |
|            | Ca(ICC2/PI489777)SNP_14308 | 1255 | A | G | 30  | 16  | --   | --  |
| CakTC26417 | Ca(ICC2/PI489777)SNP_14309 | 435  | A | C | 25  | 15  | --   | --  |
|            | Ca(ICC2/PI489777)SNP_14310 | 935  | A | G | 22  | 13  | --   | --  |
| CakTC41250 | Ca(ICC2/PI489777)SNP_14311 | 325  | C | T | 19  | 5   | --   | --  |
|            | Ca(ICC2/PI489777)SNP_14312 | 328  | C | A | 19  | 5   | --   | --  |
|            | Ca(ICC2/PI489777)SNP_14313 | 339  | C | T | 17  | 4   | --   | --  |
| CakTC28189 | Ca(ICC2/PI489777)SNP_14314 | 904  | A | G | 4   | 3   | --   | --  |
| CakTC41751 | Ca(ICC2/PI489777)SNP_14315 | 1520 | G | A | 19  | 12  | --   | --  |
|            | Ca(ICC2/PI489777)SNP_14316 | 2330 | C | T | 6   | 7   | --   | --  |
| CakTC37837 | Ca(ICC2/PI489777)SNP_14317 | 914  | G | A | 20  | 24  | --   | --  |
|            | Ca(ICC2/PI489777)SNP_14318 | 959  | G | C | 16  | 19  | --   | --  |
|            | Ca(ICC2/PI489777)SNP_14319 | 1203 | G | C | 8   | 7   | --   | --  |
|            | Ca(ICC2/PI489777)SNP_14320 | 1219 | C | G | 7   | 5   | --   | --  |
| CakTC13750 | Ca(ICC2/PI489777)SNP_14321 | 651  | A | G | 5   | 5   | --   | --  |
| CakTC27630 | Ca(ICC2/PI489777)SNP_14322 | 711  | T | C | 12  | 13  | --   | --  |
|            | Ca(ICC2/PI489777)SNP_14323 | 990  | A | G | 13  | 9   | --   | --  |
| CakTC43178 | Ca(ICC2/PI489777)SNP_14324 | 744  | G | T | 11  | 6   | --   | --  |
| CakTC29536 | Ca(ICC2/PI489777)SNP_14325 | 1426 | A | G | 30  | 18  | --   | --  |
| CakTC30970 | Ca(ICC2/PI489777)SNP_14326 | 1394 | C | T | 7   | 4   | --   | --  |
|            | Ca(ICC2/PI489777)SNP_14327 | 1409 | C | A | 6   | 4   | --   | --  |
|            | Ca(ICC2/PI489777)SNP_14328 | 2516 | C | G | 4   | 3   | --   | --  |
| CakTC42302 | Ca(ICC2/PI489777)SNP_14329 | 279  | T | G | 3   | 3   | --   | --  |
| CakTC23916 | Ca(ICC2/PI489777)SNP_14330 | 470  | A | T | 5   | 9   | --   | --  |
|            | Ca(ICC2/PI489777)SNP_14331 | 1073 | T | G | 7   | 7   | --   | --  |
|            | Ca(ICC2/PI489777)SNP_14332 | 2912 | G | A | 3   | 6   | --   | --  |
|            | Ca(ICC2/PI489777)SNP_14333 | 3191 | C | T | 3   | 7   | --   | --  |
|            | Ca(ICC2/PI489777)SNP_14334 | 3463 | T | A | 3   | 3   | --   | --  |
| CakTC02800 | Ca(ICC2/PI489777)SNP_14335 | 120  | T | C | 6   | 3   | --   | --  |
|            | Ca(ICC2/PI489777)SNP_14336 | 147  | A | T | 5   | 3   | --   | --  |
| CakTC31305 | Ca(ICC2/PI489777)SNP_14337 | 411  | T | C | 3   | 3   | --   | --  |
|            | Ca(ICC2/PI489777)SNP_14338 | 802  | A | G | 3   | 3   | --   | --  |
|            | Ca(ICC2/PI489777)SNP_14339 | 818  | A | G | 3   | 3   | --   | --  |
|            | Ca(ICC2/PI489777)SNP_14340 | 820  | G | A | 3   | 3   | --   | --  |
|            | Ca(ICC2/PI489777)SNP_14341 | 850  | A | G | 4   | 3   | --   | --  |
|            | Ca(ICC2/PI489777)SNP_14342 | 903  | C | T | 4   | 3   | --   | --  |
|            | Ca(ICC2/PI489777)SNP_14343 | 915  | A | G | 4   | 3   | --   | --  |
|            | Ca(ICC2/PI489777)SNP_14344 | 1157 | A | G | 3   | 6   | --   | --  |
| CakTC37154 | Ca(ICC2/PI489777)SNP_14345 | 369  | A | G | 33  | 19  | --   | --  |
|            | Ca(ICC2/PI489777)SNP_14346 | 390  | C | T | 70  | 33  | --   | --  |
|            | Ca(ICC2/PI489777)SNP_14347 | 553  | A | C | 55  | 24  | --   | --  |
|            | Ca(ICC2/PI489777)SNP_14348 | 1182 | C | A | 5   | 3   | --   | --  |
| CakTC38008 | Ca(ICC2/PI489777)SNP_14349 | 926  | G | C | 21  | 8   | --   | --  |
|            | Ca(ICC2/PI489777)SNP_14350 | 931  | C | T | 21  | 8   | --   | --  |
|            | Ca(ICC2/PI489777)SNP_14351 | 972  | G | T | 19  | 6   | --   | --  |

|            |                            |      |   |   |     |    |       |    |
|------------|----------------------------|------|---|---|-----|----|-------|----|
| CakTC41498 | Ca(ICC2/PI489777)SNP_14352 | 91   | A | C | 5   | 3  | --    | -- |
|            | Ca(ICC2/PI489777)SNP_14353 | 433  | A | G | 40  | 9  | --    | -- |
| CakTC39393 | Ca(ICC2/PI489777)SNP_14354 | 287  | T | C | 18  | 14 | --    | -- |
|            | Ca(ICC2/PI489777)SNP_14355 | 603  | C | A | 31  | 26 | --    | -- |
|            | Ca(ICC2/PI489777)SNP_14356 | 714  | G | C | 45  | 27 | --    | -- |
|            | Ca(ICC2/PI489777)SNP_14357 | 1331 | G | T | 20  | 13 | --    | -- |
| CakTC40825 | Ca(ICC2/PI489777)SNP_14358 | 359  | G | A | 15  | 4  | --    | -- |
|            | Ca(ICC2/PI489777)SNP_14359 | 1682 | A | T | 22  | 13 | --    | -- |
| CakTC25517 | Ca(ICC2/PI489777)SNP_14360 | 309  | G | A | 15  | 10 | --    | -- |
| CakTC34703 | Ca(ICC2/PI489777)SNP_14361 | 393  | A | T | 50  | 37 | --    | -- |
|            | Ca(ICC2/PI489777)SNP_14362 | 573  | C | T | 53  | 35 | --    | -- |
|            | Ca(ICC2/PI489777)SNP_14363 | 1062 | G | A | 93  | 39 | --    | -- |
|            | Ca(ICC2/PI489777)SNP_14364 | 2286 | C | T | 46  | 31 | --    | -- |
|            | Ca(ICC2/PI489777)SNP_14365 | 2513 | A | C | 53  | 30 | --    | -- |
|            | Ca(ICC2/PI489777)SNP_14366 | 3321 | A | G | 43  | 31 | --    | -- |
|            | Ca(ICC2/PI489777)SNP_14367 | 3576 | G | C | 17  | 19 | --    | -- |
| CakTC40064 | Ca(ICC2/PI489777)SNP_14368 | 874  | A | G | 31  | 12 | --    | -- |
|            | Ca(ICC2/PI489777)SNP_14369 | 929  | T | C | 35  | 11 | --    | -- |
|            | Ca(ICC2/PI489777)SNP_14370 | 1528 | G | A | 15  | 7  | --    | -- |
| CakTC34155 | Ca(ICC2/PI489777)SNP_14371 | 181  | A | C | 13  | 11 | --    | -- |
|            | Ca(ICC2/PI489777)SNP_14372 | 663  | C | T | 14  | 8  | --    | -- |
|            | Ca(ICC2/PI489777)SNP_14373 | 978  | T | C | 30  | 16 | --    | -- |
|            | Ca(ICC2/PI489777)SNP_14374 | 1401 | T | C | 28  | 14 | --    | -- |
|            | Ca(ICC2/PI489777)SNP_14375 | 2145 | T | G | 21  | 24 | --    | -- |
|            | Ca(ICC2/PI489777)SNP_14376 | 2265 | G | A | 25  | 25 | --    | -- |
|            | Ca(ICC2/PI489777)SNP_14377 | 3495 | T | C | 28  | 9  | --    | -- |
|            | Ca(ICC2/PI489777)SNP_14378 | 3573 | A | G | 31  | 10 | --    | -- |
|            | Ca(ICC2/PI489777)SNP_14379 | 5208 | A | C | 38  | 25 | --    | -- |
|            | Ca(ICC2/PI489777)SNP_14380 | 5991 | T | A | 22  | 31 | --    | -- |
|            | Ca(ICC2/PI489777)SNP_14381 | 6177 | A | C | 27  | 32 | --    | -- |
|            | Ca(ICC2/PI489777)SNP_14382 | 6267 | T | C | 28  | 23 | --    | -- |
|            | Ca(ICC2/PI489777)SNP_14383 | 6483 | A | G | 28  | 16 | --    | -- |
|            | Ca(ICC2/PI489777)SNP_14384 | 7392 | C | T | 31  | 16 | --    | -- |
| CakTC26831 | Ca(ICC2/PI489777)SNP_14385 | 564  | G | A | 192 | 83 | --    | -- |
| CakTC24852 | Ca(ICC2/PI489777)SNP_14386 | 283  | C | G | 6   | 3  | Shoot | -- |
| CakTC35519 | Ca(ICC2/PI489777)SNP_14387 | 1309 | T | C | 8   | 11 | --    | -- |
|            | Ca(ICC2/PI489777)SNP_14388 | 1427 | G | A | 6   | 9  | --    | -- |
|            | Ca(ICC2/PI489777)SNP_14389 | 1504 | C | T | 5   | 8  | --    | -- |
|            | Ca(ICC2/PI489777)SNP_14390 | 2465 | T | C | 4   | 4  | --    | -- |
|            | Ca(ICC2/PI489777)SNP_14391 | 2792 | C | T | 8   | 3  | --    | -- |
| CakTC13699 | Ca(ICC2/PI489777)SNP_14392 | 1616 | A | G | 4   | 12 | --    | -- |
| CakTC10780 | Ca(ICC2/PI489777)SNP_14393 | 421  | A | G | 71  | 28 | --    | -- |
|            | Ca(ICC2/PI489777)SNP_14394 | 987  | C | G | 121 | 43 | --    | -- |
|            | Ca(ICC2/PI489777)SNP_14395 | 1510 | T | A | 116 | 35 | --    | -- |
|            | Ca(ICC2/PI489777)SNP_14396 | 2497 | A | G | 83  | 35 | --    | -- |
|            | Ca(ICC2/PI489777)SNP_14397 | 2640 | A | G | 79  | 31 | --    | -- |
|            | Ca(ICC2/PI489777)SNP_14398 | 2746 | G | A | 61  | 29 | --    | -- |
| CakTC40837 | Ca(ICC2/PI489777)SNP_14399 | 1178 | T | C | 120 | 20 | --    | -- |
|            | Ca(ICC2/PI489777)SNP_14400 | 1209 | C | T | 120 | 21 | --    | -- |
|            | Ca(ICC2/PI489777)SNP_14401 | 1245 | A | C | 130 | 33 | --    | -- |
|            | Ca(ICC2/PI489777)SNP_14402 | 1310 | C | T | 119 | 32 | --    | -- |
| CakTC39432 | Ca(ICC2/PI489777)SNP_14403 | 161  | G | A | 12  | 7  | --    | -- |
|            | Ca(ICC2/PI489777)SNP_14404 | 436  | G | A | 9   | 10 | --    | -- |
|            | Ca(ICC2/PI489777)SNP_14405 | 972  | T | C | 11  | 13 | --    | -- |
|            | Ca(ICC2/PI489777)SNP_14406 | 1324 | A | G | 6   | 9  | --    | -- |
|            | Ca(ICC2/PI489777)SNP_14407 | 1326 | T | C | 6   | 9  | --    | -- |
|            | Ca(ICC2/PI489777)SNP_14408 | 1341 | T | C | 6   | 8  | --    | -- |
| CakTC12418 | Ca(ICC2/PI489777)SNP_14409 | 219  | A | G | 4   | 5  | --    | -- |
|            | Ca(ICC2/PI489777)SNP_14410 | 252  | C | T | 4   | 5  | --    | -- |
|            | Ca(ICC2/PI489777)SNP_14411 | 288  | T | C | 4   | 6  | --    | -- |
| CakTC41282 | Ca(ICC2/PI489777)SNP_14412 | 1033 | A | C | 6   | 14 | --    | -- |
| CakTC28648 | Ca(ICC2/PI489777)SNP_14413 | 57   | G | A | 5   | 3  | --    | -- |
|            | Ca(ICC2/PI489777)SNP_14414 | 411  | C | T | 14  | 4  | --    | -- |
| CakTC39670 | Ca(ICC2/PI489777)SNP_14415 | 1008 | T | A | 8   | 4  | --    | -- |
| CakTC28009 | Ca(ICC2/PI489777)SNP_14416 | 859  | A | G | 6   | 4  | --    | -- |
|            | Ca(ICC2/PI489777)SNP_14417 | 1031 | T | C | 4   | 6  | --    | -- |
|            | Ca(ICC2/PI489777)SNP_14418 | 1045 | A | T | 4   | 6  | --    | -- |
| CakTC12266 | Ca(ICC2/PI489777)SNP_14419 | 237  | G | A | 6   | 5  | --    | -- |
| CakTC32560 | Ca(ICC2/PI489777)SNP_14420 | 51   | C | T | 4   | 5  | --    | -- |
|            | Ca(ICC2/PI489777)SNP_14421 | 59   | G | T | 5   | 5  | --    | -- |
|            | Ca(ICC2/PI489777)SNP_14422 | 247  | C | T | 5   | 6  | --    | -- |
| CakTC39614 | Ca(ICC2/PI489777)SNP_14423 | 2061 | C | G | 16  | 9  | --    | -- |
| CakTC11472 | Ca(ICC2/PI489777)SNP_14424 | 271  | A | G | 38  | 22 | --    | -- |
| CakTC12526 | Ca(ICC2/PI489777)SNP_14425 | 717  | G | T | 3   | 3  | --    | -- |

|            |                            |      |   |   |     |     |    |      |
|------------|----------------------------|------|---|---|-----|-----|----|------|
|            | Ca(ICC2/PI489777)SNP_14426 | 787  | G | A | 3   | 3   | -- | --   |
| CakTC10593 | Ca(ICC2/PI489777)SNP_14427 | 893  | C | T | 6   | 4   | -- | GRAS |
| CakTC31395 | Ca(ICC2/PI489777)SNP_14428 | 1660 | T | C | 4   | 3   | -- | --   |
|            | Ca(ICC2/PI489777)SNP_14429 | 1665 | A | C | 5   | 3   | -- | --   |
|            | Ca(ICC2/PI489777)SNP_14430 | 1753 | C | G | 6   | 6   | -- | --   |
|            | Ca(ICC2/PI489777)SNP_14431 | 2568 | A | G | 6   | 5   | -- | --   |
| CakTC34371 | Ca(ICC2/PI489777)SNP_14432 | 64   | T | G | 12  | 9   | -- | --   |
| CakTC23234 | Ca(ICC2/PI489777)SNP_14433 | 280  | G | T | 4   | 5   | -- | --   |
| CakTC31343 | Ca(ICC2/PI489777)SNP_14434 | 273  | C | T | 4   | 3   | -- | --   |
|            | Ca(ICC2/PI489777)SNP_14435 | 288  | G | A | 5   | 3   | -- | --   |
| CakTC30154 | Ca(ICC2/PI489777)SNP_14436 | 150  | C | T | 4   | 4   | -- | --   |
|            | Ca(ICC2/PI489777)SNP_14437 | 240  | A | G | 4   | 4   | -- | --   |
| CakTC32683 | Ca(ICC2/PI489777)SNP_14438 | 1140 | T | C | 6   | 7   | -- | --   |
|            | Ca(ICC2/PI489777)SNP_14439 | 1320 | C | T | 3   | 3   | -- | --   |
|            | Ca(ICC2/PI489777)SNP_14440 | 2259 | C | T | 9   | 3   | -- | --   |
|            | Ca(ICC2/PI489777)SNP_14441 | 2520 | T | G | 11  | 4   | -- | --   |
|            | Ca(ICC2/PI489777)SNP_14442 | 4539 | T | C | 5   | 5   | -- | --   |
|            | Ca(ICC2/PI489777)SNP_14443 | 5310 | T | A | 4   | 4   | -- | --   |
| CakTC07889 | Ca(ICC2/PI489777)SNP_14444 | 184  | G | A | 10  | 3   | -- | --   |
|            | Ca(ICC2/PI489777)SNP_14445 | 500  | T | C | 10  | 10  | -- | --   |
|            | Ca(ICC2/PI489777)SNP_14446 | 2850 | T | C | 7   | 4   | -- | --   |
|            | Ca(ICC2/PI489777)SNP_14447 | 2880 | G | A | 4   | 4   | -- | --   |
|            | Ca(ICC2/PI489777)SNP_14448 | 2910 | T | C | 4   | 5   | -- | --   |
|            | Ca(ICC2/PI489777)SNP_14449 | 2967 | A | G | 4   | 4   | -- | --   |
|            | Ca(ICC2/PI489777)SNP_14450 | 3132 | C | T | 5   | 7   | -- | --   |
|            | Ca(ICC2/PI489777)SNP_14451 | 3264 | T | C | 7   | 6   | -- | --   |
| CakTC37156 | Ca(ICC2/PI489777)SNP_14452 | 405  | C | T | 9   | 8   | -- | --   |
|            | Ca(ICC2/PI489777)SNP_14453 | 748  | T | C | 5   | 5   | -- | --   |
| CakTC38922 | Ca(ICC2/PI489777)SNP_14454 | 771  | A | T | 17  | 9   | -- | --   |
| CakTC23951 | Ca(ICC2/PI489777)SNP_14455 | 229  | T | C | 46  | 7   | -- | --   |
|            | Ca(ICC2/PI489777)SNP_14456 | 331  | G | A | 45  | 6   | -- | --   |
| CakTC33877 | Ca(ICC2/PI489777)SNP_14457 | 195  | A | G | 112 | 26  | -- | --   |
|            | Ca(ICC2/PI489777)SNP_14458 | 219  | C | T | 113 | 28  | -- | --   |
| CakTC37401 | Ca(ICC2/PI489777)SNP_14459 | 184  | G | A | 41  | 26  | -- | --   |
|            | Ca(ICC2/PI489777)SNP_14460 | 378  | C | T | 64  | 39  | -- | --   |
|            | Ca(ICC2/PI489777)SNP_14461 | 435  | G | T | 69  | 37  | -- | --   |
|            | Ca(ICC2/PI489777)SNP_14462 | 987  | T | C | 45  | 25  | -- | --   |
| CakTC37982 | Ca(ICC2/PI489777)SNP_14463 | 75   | C | T | 14  | 5   | -- | --   |
|            | Ca(ICC2/PI489777)SNP_14464 | 126  | T | C | 15  | 5   | -- | --   |
|            | Ca(ICC2/PI489777)SNP_14465 | 133  | G | A | 15  | 4   | -- | --   |
|            | Ca(ICC2/PI489777)SNP_14466 | 150  | C | T | 15  | 5   | -- | --   |
|            | Ca(ICC2/PI489777)SNP_14467 | 223  | T | C | 14  | 3   | -- | --   |
|            | Ca(ICC2/PI489777)SNP_14468 | 624  | C | T | 9   | 7   | -- | --   |
|            | Ca(ICC2/PI489777)SNP_14469 | 996  | G | C | 17  | 6   | -- | --   |
| CakTC32271 | Ca(ICC2/PI489777)SNP_14470 | 2585 | G | A | 14  | 3   | -- | --   |
|            | Ca(ICC2/PI489777)SNP_14471 | 3987 | A | G | 14  | 7   | -- | --   |
|            | Ca(ICC2/PI489777)SNP_14472 | 4515 | C | T | 16  | 4   | -- | --   |
|            | Ca(ICC2/PI489777)SNP_14473 | 4694 | T | C | 19  | 6   | -- | --   |
|            | Ca(ICC2/PI489777)SNP_14474 | 4915 | T | C | 20  | 10  | -- | --   |
|            | Ca(ICC2/PI489777)SNP_14475 | 5139 | C | T | 12  | 9   | -- | --   |
|            | Ca(ICC2/PI489777)SNP_14476 | 5161 | G | A | 16  | 12  | -- | --   |
|            | Ca(ICC2/PI489777)SNP_14477 | 5168 | T | A | 13  | 12  | -- | --   |
|            | Ca(ICC2/PI489777)SNP_14478 | 5249 | C | G | 10  | 12  | -- | --   |
| CakTC43018 | Ca(ICC2/PI489777)SNP_14479 | 32   | A | T | 30  | 18  | -- | --   |
| CakTC10923 | Ca(ICC2/PI489777)SNP_14480 | 466  | T | C | 66  | 84  | -- | --   |
|            | Ca(ICC2/PI489777)SNP_14481 | 601  | C | T | 60  | 93  | -- | --   |
|            | Ca(ICC2/PI489777)SNP_14482 | 736  | C | T | 57  | 83  | -- | --   |
|            | Ca(ICC2/PI489777)SNP_14483 | 979  | C | T | 65  | 100 | -- | --   |
| CakTC39866 | Ca(ICC2/PI489777)SNP_14484 | 1140 | A | C | 20  | 15  | -- | --   |
| CakTC28232 | Ca(ICC2/PI489777)SNP_14485 | 734  | A | C | 14  | 11  | -- | --   |
|            | Ca(ICC2/PI489777)SNP_14486 | 1098 | G | A | 72  | 20  | -- | --   |
|            | Ca(ICC2/PI489777)SNP_14487 | 1428 | C | T | 67  | 30  | -- | --   |
| CakTC35738 | Ca(ICC2/PI489777)SNP_14488 | 1186 | T | G | 7   | 9   | -- | --   |
|            | Ca(ICC2/PI489777)SNP_14489 | 3664 | G | A | 4   | 6   | -- | --   |
|            | Ca(ICC2/PI489777)SNP_14490 | 3893 | A | C | 9   | 8   | -- | --   |
| CakTC40153 | Ca(ICC2/PI489777)SNP_14491 | 229  | T | G | 7   | 11  | -- | --   |
|            | Ca(ICC2/PI489777)SNP_14492 | 305  | G | A | 11  | 9   | -- | --   |
|            | Ca(ICC2/PI489777)SNP_14493 | 608  | A | G | 16  | 15  | -- | --   |
|            | Ca(ICC2/PI489777)SNP_14494 | 887  | A | G | 10  | 7   | -- | --   |
|            | Ca(ICC2/PI489777)SNP_14495 | 959  | G | C | 10  | 8   | -- | --   |
|            | Ca(ICC2/PI489777)SNP_14496 | 989  | A | G | 9   | 9   | -- | --   |
| CakTC38128 | Ca(ICC2/PI489777)SNP_14497 | 162  | A | G | 8   | 6   | -- | --   |
| CakTC39936 | Ca(ICC2/PI489777)SNP_14498 | 992  | T | C | 7   | 7   | -- | --   |
|            | Ca(ICC2/PI489777)SNP_14499 | 1204 | A | C | 8   | 8   | -- | --   |

|            |                            |      |   |   |    |    |        |      |
|------------|----------------------------|------|---|---|----|----|--------|------|
| CakTC41181 | Ca(ICC2/PI489777)SNP_14500 | 98   | A | G | 12 | 33 | --     | --   |
| CakTC02206 | Ca(ICC2/PI489777)SNP_14501 | 353  | C | G | 10 | 19 | --     | --   |
|            | Ca(ICC2/PI489777)SNP_14502 | 791  | G | A | 4  | 11 | --     | --   |
| CakTC39677 | Ca(ICC2/PI489777)SNP_14503 | 149  | G | A | 5  | 9  | --     | --   |
|            | Ca(ICC2/PI489777)SNP_14504 | 956  | G | T | 7  | 7  | --     | --   |
| CakTC41999 | Ca(ICC2/PI489777)SNP_14505 | 439  | C | A | 7  | 6  | Root   | MADS |
|            | Ca(ICC2/PI489777)SNP_14506 | 752  | G | A | 6  | 3  | Root   | MADS |
|            | Ca(ICC2/PI489777)SNP_14507 | 810  | G | A | 9  | 6  | Root   | MADS |
|            | Ca(ICC2/PI489777)SNP_14508 | 838  | C | T | 8  | 6  | Root   | MADS |
|            | Ca(ICC2/PI489777)SNP_14509 | 868  | T | C | 7  | 6  | Root   | MADS |
|            | Ca(ICC2/PI489777)SNP_14510 | 972  | T | G | 5  | 6  | Root   | MADS |
|            | Ca(ICC2/PI489777)SNP_14511 | 984  | T | C | 5  | 6  | Root   | MADS |
|            | Ca(ICC2/PI489777)SNP_14512 | 999  | T | A | 5  | 4  | Root   | MADS |
| CakTC26525 | Ca(ICC2/PI489777)SNP_14513 | 234  | G | C | 51 | 9  | --     | --   |
|            | Ca(ICC2/PI489777)SNP_14514 | 541  | T | A | 66 | 9  | --     | --   |
|            | Ca(ICC2/PI489777)SNP_14515 | 1267 | T | C | 35 | 10 | --     | --   |
| CakTC25986 | Ca(ICC2/PI489777)SNP_14516 | 774  | G | A | 5  | 3  | --     | --   |
| CakTC16981 | Ca(ICC2/PI489777)SNP_14517 | 165  | C | G | 33 | 6  | --     | --   |
|            | Ca(ICC2/PI489777)SNP_14518 | 579  | A | G | 57 | 19 | --     | --   |
|            | Ca(ICC2/PI489777)SNP_14519 | 1354 | T | A | 49 | 51 | --     | --   |
| CakTC09826 | Ca(ICC2/PI489777)SNP_14520 | 1024 | G | C | 4  | 3  | --     | --   |
|            | Ca(ICC2/PI489777)SNP_14521 | 1349 | A | G | 5  | 3  | --     | --   |
|            | Ca(ICC2/PI489777)SNP_14522 | 1574 | A | G | 4  | 3  | --     | --   |
| CakTC12271 | Ca(ICC2/PI489777)SNP_14523 | 309  | T | C | 7  | 4  | Flower | bud  |
| CakTC10967 | Ca(ICC2/PI489777)SNP_14524 | 1245 | T | C | 5  | 3  | --     | MYB  |
| CakTC30373 | Ca(ICC2/PI489777)SNP_14525 | 489  | G | T | 5  | 3  | --     | --   |
|            | Ca(ICC2/PI489777)SNP_14526 | 588  | G | A | 4  | 3  | --     | --   |
|            | Ca(ICC2/PI489777)SNP_14527 | 594  | C | T | 4  | 3  | --     | --   |
|            | Ca(ICC2/PI489777)SNP_14528 | 600  | G | A | 4  | 3  | --     | --   |
|            | Ca(ICC2/PI489777)SNP_14529 | 653  | T | C | 6  | 5  | --     | --   |
|            | Ca(ICC2/PI489777)SNP_14530 | 675  | A | G | 6  | 4  | --     | --   |
|            | Ca(ICC2/PI489777)SNP_14531 | 693  | G | A | 6  | 5  | --     | --   |
| CakTC36780 | Ca(ICC2/PI489777)SNP_14532 | 528  | C | G | 10 | 6  | --     | --   |
|            | Ca(ICC2/PI489777)SNP_14533 | 1073 | T | C | 18 | 4  | --     | --   |
|            | Ca(ICC2/PI489777)SNP_14534 | 1075 | T | A | 18 | 4  | --     | --   |
|            | Ca(ICC2/PI489777)SNP_14535 | 1113 | A | G | 14 | 4  | --     | --   |
|            | Ca(ICC2/PI489777)SNP_14536 | 1345 | A | C | 9  | 5  | --     | --   |
|            | Ca(ICC2/PI489777)SNP_14537 | 1359 | T | C | 10 | 5  | --     | --   |
|            | Ca(ICC2/PI489777)SNP_14538 | 1513 | T | C | 6  | 5  | --     | --   |
|            | Ca(ICC2/PI489777)SNP_14539 | 1688 | A | C | 11 | 8  | --     | --   |
|            | Ca(ICC2/PI489777)SNP_14540 | 1783 | C | A | 14 | 6  | --     | --   |
|            | Ca(ICC2/PI489777)SNP_14541 | 1800 | A | G | 13 | 6  | --     | --   |
|            | Ca(ICC2/PI489777)SNP_14542 | 1862 | T | G | 17 | 5  | --     | --   |
|            | Ca(ICC2/PI489777)SNP_14543 | 2088 | C | G | 13 | 7  | --     | --   |
|            | Ca(ICC2/PI489777)SNP_14544 | 2591 | C | T | 19 | 5  | --     | --   |
|            | Ca(ICC2/PI489777)SNP_14545 | 3291 | C | T | 15 | 3  | --     | --   |
| CakTC39343 | Ca(ICC2/PI489777)SNP_14546 | 539  | T | C | 3  | 10 | --     | --   |
|            | Ca(ICC2/PI489777)SNP_14547 | 1094 | T | A | 4  | 6  | --     | --   |
|            | Ca(ICC2/PI489777)SNP_14548 | 1106 | A | G | 6  | 4  | --     | --   |
| CakTC31798 | Ca(ICC2/PI489777)SNP_14549 | 570  | A | G | 13 | 4  | --     | --   |
|            | Ca(ICC2/PI489777)SNP_14550 | 753  | G | A | 14 | 7  | --     | --   |
|            | Ca(ICC2/PI489777)SNP_14551 | 1199 | G | C | 14 | 3  | --     | --   |
| CakTC26790 | Ca(ICC2/PI489777)SNP_14552 | 240  | C | T | 36 | 6  | --     | --   |
| CakTC29916 | Ca(ICC2/PI489777)SNP_14553 | 906  | T | C | 28 | 8  | --     | --   |
|            | Ca(ICC2/PI489777)SNP_14554 | 942  | A | C | 23 | 8  | --     | --   |
|            | Ca(ICC2/PI489777)SNP_14555 | 1248 | A | T | 14 | 8  | --     | --   |
|            | Ca(ICC2/PI489777)SNP_14556 | 1455 | A | G | 8  | 6  | --     | --   |
|            | Ca(ICC2/PI489777)SNP_14557 | 1599 | A | G | 4  | 10 | --     | --   |
|            | Ca(ICC2/PI489777)SNP_14558 | 2143 | G | A | 8  | 12 | --     | --   |
|            | Ca(ICC2/PI489777)SNP_14559 | 2639 | T | C | 8  | 9  | --     | --   |
| CakTC18662 | Ca(ICC2/PI489777)SNP_14560 | 634  | A | G | 3  | 9  | --     | --   |
|            | Ca(ICC2/PI489777)SNP_14561 | 640  | C | T | 3  | 9  | --     | --   |
|            | Ca(ICC2/PI489777)SNP_14562 | 652  | A | G | 3  | 9  | --     | --   |
|            | Ca(ICC2/PI489777)SNP_14563 | 733  | T | A | 6  | 9  | --     | --   |
|            | Ca(ICC2/PI489777)SNP_14564 | 973  | A | C | 13 | 7  | --     | --   |
|            | Ca(ICC2/PI489777)SNP_14565 | 1000 | G | T | 14 | 7  | --     | --   |
|            | Ca(ICC2/PI489777)SNP_14566 | 1090 | G | A | 13 | 8  | --     | --   |
|            | Ca(ICC2/PI489777)SNP_14567 | 2102 | A | G | 17 | 6  | --     | --   |
| CakTC41980 | Ca(ICC2/PI489777)SNP_14568 | 409  | T | C | 6  | 3  | --     | --   |
| CakTC33378 | Ca(ICC2/PI489777)SNP_14569 | 636  | C | A | 23 | 8  | --     | --   |
|            | Ca(ICC2/PI489777)SNP_14570 | 951  | A | G | 36 | 15 | --     | --   |
|            | Ca(ICC2/PI489777)SNP_14571 | 1218 | A | T | 30 | 29 | --     | --   |
|            | Ca(ICC2/PI489777)SNP_14572 | 1626 | G | A | 33 | 12 | --     | --   |
|            | Ca(ICC2/PI489777)SNP_14573 | 2001 | G | A | 33 | 7  | --     | --   |

|            |                            |      |   |   |     |    |    |    |
|------------|----------------------------|------|---|---|-----|----|----|----|
|            | Ca(ICC2/PI489777)SNP_14574 | 2004 | G | T | 32  | 8  | -- | -- |
|            | Ca(ICC2/PI489777)SNP_14575 | 2083 | A | G | 13  | 5  | -- | -- |
| CakTC38645 | Ca(ICC2/PI489777)SNP_14576 | 825  | G | A | 9   | 6  | -- | -- |
|            | Ca(ICC2/PI489777)SNP_14577 | 910  | T | A | 7   | 4  | -- | -- |
|            | Ca(ICC2/PI489777)SNP_14578 | 1627 | T | G | 9   | 3  | -- | -- |
| CakTC26659 | Ca(ICC2/PI489777)SNP_14579 | 519  | T | A | 34  | 10 | -- | -- |
|            | Ca(ICC2/PI489777)SNP_14580 | 567  | C | T | 31  | 3  | -- | -- |
|            | Ca(ICC2/PI489777)SNP_14581 | 663  | A | G | 24  | 3  | -- | -- |
| CakTC27160 | Ca(ICC2/PI489777)SNP_14582 | 240  | A | G | 36  | 4  | -- | -- |
| CakTC23877 | Ca(ICC2/PI489777)SNP_14583 | 382  | C | T | 267 | 54 | -- | -- |
|            | Ca(ICC2/PI489777)SNP_14584 | 415  | A | G | 259 | 59 | -- | -- |
|            | Ca(ICC2/PI489777)SNP_14585 | 1404 | A | G | 169 | 38 | -- | -- |
|            | Ca(ICC2/PI489777)SNP_14586 | 1468 | T | C | 107 | 28 | -- | -- |
| CakTC25569 | Ca(ICC2/PI489777)SNP_14587 | 785  | C | T | 143 | 50 | -- | -- |
|            | Ca(ICC2/PI489777)SNP_14588 | 919  | C | T | 136 | 57 | -- | -- |
|            | Ca(ICC2/PI489777)SNP_14589 | 1747 | G | C | 139 | 67 | -- | -- |
| CakTC33198 | Ca(ICC2/PI489777)SNP_14590 | 363  | T | C | 7   | 3  | -- | -- |
|            | Ca(ICC2/PI489777)SNP_14591 | 1758 | A | T | 4   | 7  | -- | -- |
|            | Ca(ICC2/PI489777)SNP_14592 | 5146 | A | G | 12  | 5  | -- | -- |
| CakTC43224 | Ca(ICC2/PI489777)SNP_14593 | 288  | C | T | 3   | 5  | -- | -- |
|            | Ca(ICC2/PI489777)SNP_14594 | 321  | G | C | 4   | 5  | -- | -- |
|            | Ca(ICC2/PI489777)SNP_14595 | 363  | T | C | 3   | 5  | -- | -- |
| CakTC31018 | Ca(ICC2/PI489777)SNP_14596 | 178  | T | A | 3   | 6  | -- | -- |
|            | Ca(ICC2/PI489777)SNP_14597 | 526  | T | C | 6   | 5  | -- | -- |
| CakTC11409 | Ca(ICC2/PI489777)SNP_14598 | 22   | G | C | 3   | 4  | -- | -- |
|            | Ca(ICC2/PI489777)SNP_14599 | 465  | G | A | 7   | 3  | -- | -- |
| CakTC37060 | Ca(ICC2/PI489777)SNP_14600 | 304  | C | T | 8   | 7  | -- | -- |
|            | Ca(ICC2/PI489777)SNP_14601 | 1582 | T | C | 17  | 8  | -- | -- |
|            | Ca(ICC2/PI489777)SNP_14602 | 2167 | A | G | 11  | 11 | -- | -- |
|            | Ca(ICC2/PI489777)SNP_14603 | 2263 | G | C | 13  | 6  | -- | -- |
|            | Ca(ICC2/PI489777)SNP_14604 | 2845 | A | C | 5   | 12 | -- | -- |
|            | Ca(ICC2/PI489777)SNP_14605 | 3253 | C | T | 15  | 10 | -- | -- |
|            | Ca(ICC2/PI489777)SNP_14606 | 3694 | C | T | 19  | 12 | -- | -- |
| CakTC43193 | Ca(ICC2/PI489777)SNP_14607 | 35   | T | C | 7   | 15 | -- | -- |
|            | Ca(ICC2/PI489777)SNP_14608 | 313  | A | C | 7   | 26 | -- | -- |
|            | Ca(ICC2/PI489777)SNP_14609 | 373  | C | G | 7   | 28 | -- | -- |
|            | Ca(ICC2/PI489777)SNP_14610 | 558  | C | T | 10  | 11 | -- | -- |
|            | Ca(ICC2/PI489777)SNP_14611 | 600  | T | C | 12  | 11 | -- | -- |
|            | Ca(ICC2/PI489777)SNP_14612 | 807  | T | C | 11  | 6  | -- | -- |
|            | Ca(ICC2/PI489777)SNP_14613 | 1415 | G | A | 13  | 15 | -- | -- |
| CakTC24715 | Ca(ICC2/PI489777)SNP_14614 | 736  | G | A | 24  | 11 | -- | -- |
|            | Ca(ICC2/PI489777)SNP_14615 | 762  | C | T | 28  | 16 | -- | -- |
|            | Ca(ICC2/PI489777)SNP_14616 | 1071 | T | A | 22  | 11 | -- | -- |
| CakTC23280 | Ca(ICC2/PI489777)SNP_14617 | 335  | T | C | 5   | 4  | -- | -- |
|            | Ca(ICC2/PI489777)SNP_14618 | 429  | G | T | 4   | 5  | -- | -- |
| CakTC31650 | Ca(ICC2/PI489777)SNP_14619 | 313  | G | A | 52  | 12 | -- | -- |
|            | Ca(ICC2/PI489777)SNP_14620 | 537  | T | C | 92  | 15 | -- | -- |
| CakTC32055 | Ca(ICC2/PI489777)SNP_14621 | 195  | A | T | 15  | 21 | -- | -- |
|            | Ca(ICC2/PI489777)SNP_14622 | 399  | G | C | 26  | 51 | -- | -- |
|            | Ca(ICC2/PI489777)SNP_14623 | 681  | G | A | 94  | 73 | -- | -- |
|            | Ca(ICC2/PI489777)SNP_14624 | 691  | A | T | 99  | 61 | -- | -- |
|            | Ca(ICC2/PI489777)SNP_14625 | 881  | C | T | 77  | 65 | -- | -- |
|            | Ca(ICC2/PI489777)SNP_14626 | 927  | G | A | 67  | 51 | -- | -- |
| CakTC27654 | Ca(ICC2/PI489777)SNP_14627 | 70   | T | G | 5   | 6  | -- | -- |
|            | Ca(ICC2/PI489777)SNP_14628 | 154  | C | A | 7   | 9  | -- | -- |
|            | Ca(ICC2/PI489777)SNP_14629 | 189  | C | T | 7   | 12 | -- | -- |
|            | Ca(ICC2/PI489777)SNP_14630 | 225  | A | C | 7   | 14 | -- | -- |
|            | Ca(ICC2/PI489777)SNP_14631 | 265  | G | A | 20  | 22 | -- | -- |
|            | Ca(ICC2/PI489777)SNP_14632 | 277  | T | C | 20  | 23 | -- | -- |
|            | Ca(ICC2/PI489777)SNP_14633 | 352  | G | A | 35  | 28 | -- | -- |
|            | Ca(ICC2/PI489777)SNP_14634 | 439  | G | A | 38  | 25 | -- | -- |
| CakTC26185 | Ca(ICC2/PI489777)SNP_14635 | 1178 | G | A | 12  | 22 | -- | -- |
| CakTC29963 | Ca(ICC2/PI489777)SNP_14636 | 245  | T | C | 22  | 14 | -- | -- |
|            | Ca(ICC2/PI489777)SNP_14637 | 262  | C | T | 23  | 14 | -- | -- |
|            | Ca(ICC2/PI489777)SNP_14638 | 475  | T | C | 13  | 16 | -- | -- |
|            | Ca(ICC2/PI489777)SNP_14639 | 747  | A | G | 26  | 11 | -- | -- |
|            | Ca(ICC2/PI489777)SNP_14640 | 1437 | T | C | 33  | 12 | -- | -- |
|            | Ca(ICC2/PI489777)SNP_14641 | 2297 | C | G | 28  | 10 | -- | -- |
|            | Ca(ICC2/PI489777)SNP_14642 | 2843 | A | C | 23  | 6  | -- | -- |
|            | Ca(ICC2/PI489777)SNP_14643 | 3767 | C | T | 37  | 17 | -- | -- |
|            | Ca(ICC2/PI489777)SNP_14644 | 4172 | G | C | 14  | 14 | -- | -- |
|            | Ca(ICC2/PI489777)SNP_14645 | 4872 | T | C | 14  | 9  | -- | -- |
| CakTC42614 | Ca(ICC2/PI489777)SNP_14646 | 806  | A | G | 18  | 5  | -- | -- |
| CakTC24569 | Ca(ICC2/PI489777)SNP_14647 | 774  | C | T | 4   | 3  | -- | -- |

|            |                            |      |   |   |     |     |       |     |
|------------|----------------------------|------|---|---|-----|-----|-------|-----|
| CakTC32579 | Ca(ICC2/PI489777)SNP_14648 | 239  | T | C | 4   | 7   | --    | --  |
|            | Ca(ICC2/PI489777)SNP_14649 | 947  | A | T | 3   | 8   | --    | --  |
|            | Ca(ICC2/PI489777)SNP_14650 | 1409 | C | T | 17  | 14  | --    | --  |
|            | Ca(ICC2/PI489777)SNP_14651 | 1628 | T | C | 13  | 12  | --    | --  |
| CakTC39279 | Ca(ICC2/PI489777)SNP_14652 | 276  | C | T | 13  | 5   | --    | --  |
|            | Ca(ICC2/PI489777)SNP_14653 | 347  | T | C | 12  | 4   | --    | --  |
|            | Ca(ICC2/PI489777)SNP_14654 | 415  | T | C | 16  | 3   | --    | --  |
|            | Ca(ICC2/PI489777)SNP_14655 | 721  | G | C | 13  | 8   | --    | --  |
|            | Ca(ICC2/PI489777)SNP_14656 | 990  | T | A | 10  | 4   | --    | --  |
|            | Ca(ICC2/PI489777)SNP_14657 | 1035 | G | A | 16  | 7   | --    | --  |
|            | Ca(ICC2/PI489777)SNP_14658 | 1415 | T | G | 5   | 4   | --    | --  |
| CakTC42694 | Ca(ICC2/PI489777)SNP_14659 | 1884 | T | C | 6   | 3   | --    | --  |
| CakTC38768 | Ca(ICC2/PI489777)SNP_14660 | 977  | T | A | 10  | 3   | --    | --  |
|            | Ca(ICC2/PI489777)SNP_14661 | 1013 | C | A | 17  | 3   | --    | --  |
|            | Ca(ICC2/PI489777)SNP_14662 | 1268 | G | C | 11  | 3   | --    | --  |
| CakTC01288 | Ca(ICC2/PI489777)SNP_14663 | 51   | G | T | 6   | 3   | --    | --  |
|            | Ca(ICC2/PI489777)SNP_14664 | 88   | G | T | 5   | 4   | --    | --  |
|            | Ca(ICC2/PI489777)SNP_14665 | 226  | T | C | 11  | 4   | --    | --  |
|            | Ca(ICC2/PI489777)SNP_14666 | 242  | C | G | 11  | 4   | --    | --  |
| CakTC38890 | Ca(ICC2/PI489777)SNP_14667 | 307  | T | C | 8   | 4   | --    | --  |
| CakTC39874 | Ca(ICC2/PI489777)SNP_14668 | 1652 | A | C | 15  | 22  | --    | --  |
| CakTC16394 | Ca(ICC2/PI489777)SNP_14669 | 70   | G | C | 3   | 3   | --    | --  |
|            | Ca(ICC2/PI489777)SNP_14670 | 91   | C | T | 3   | 3   | --    | --  |
| CakTC22378 | Ca(ICC2/PI489777)SNP_14671 | 489  | A | G | 103 | 117 | --    | --  |
| CakTC28343 | Ca(ICC2/PI489777)SNP_14672 | 273  | C | A | 17  | 21  | --    | --  |
|            | Ca(ICC2/PI489777)SNP_14673 | 2092 | C | T | 10  | 5   | --    | --  |
| CakTC27179 | Ca(ICC2/PI489777)SNP_14674 | 829  | A | G | 18  | 20  | --    | --  |
| CakTC38637 | Ca(ICC2/PI489777)SNP_14675 | 527  | G | T | 3   | 3   | --    | --  |
| CakTC42396 | Ca(ICC2/PI489777)SNP_14676 | 858  | A | G | 9   | 10  | --    | --  |
|            | Ca(ICC2/PI489777)SNP_14677 | 914  | T | C | 8   | 9   | --    | --  |
| CakTC25432 | Ca(ICC2/PI489777)SNP_14678 | 1851 | A | G | 6   | 3   | --    | --  |
|            | Ca(ICC2/PI489777)SNP_14679 | 1898 | C | G | 5   | 3   | --    | --  |
|            | Ca(ICC2/PI489777)SNP_14680 | 1927 | A | G | 5   | 3   | --    | --  |
| CakTC11784 | Ca(ICC2/PI489777)SNP_14681 | 490  | C | A | 11  | 7   | --    | --  |
| CakTC42366 | Ca(ICC2/PI489777)SNP_14682 | 639  | C | T | 24  | 8   | --    | --  |
|            | Ca(ICC2/PI489777)SNP_14683 | 672  | T | C | 26  | 8   | --    | --  |
|            | Ca(ICC2/PI489777)SNP_14684 | 861  | A | T | 27  | 12  | --    | --  |
|            | Ca(ICC2/PI489777)SNP_14685 | 1029 | A | G | 13  | 11  | --    | --  |
|            | Ca(ICC2/PI489777)SNP_14686 | 1324 | A | T | 23  | 13  | --    | --  |
|            | Ca(ICC2/PI489777)SNP_14687 | 1715 | C | T | 21  | 9   | --    | --  |
|            | Ca(ICC2/PI489777)SNP_14688 | 1720 | C | T | 22  | 8   | --    | --  |
| CakTC25919 | Ca(ICC2/PI489777)SNP_14689 | 571  | T | C | 5   | 9   | --    | --  |
| CakTC27030 | Ca(ICC2/PI489777)SNP_14690 | 597  | T | C | 9   | 7   | --    | LIM |
|            | Ca(ICC2/PI489777)SNP_14691 | 864  | G | A | 10  | 8   | --    | LIM |
| CakTC37928 | Ca(ICC2/PI489777)SNP_14692 | 142  | T | C | 10  | 10  | Shoot | --  |
|            | Ca(ICC2/PI489777)SNP_14693 | 863  | A | G | 4   | 7   | Shoot | --  |
| CakTC11475 | Ca(ICC2/PI489777)SNP_14694 | 1284 | C | T | 12  | 11  | --    | --  |
| CakTC34662 | Ca(ICC2/PI489777)SNP_14695 | 207  | A | G | 3   | 3   | --    | --  |
| CakTC42209 | Ca(ICC2/PI489777)SNP_14696 | 300  | T | C | 10  | 12  | --    | --  |
|            | Ca(ICC2/PI489777)SNP_14697 | 507  | A | T | 19  | 31  | --    | --  |
|            | Ca(ICC2/PI489777)SNP_14698 | 603  | C | T | 16  | 23  | --    | --  |
|            | Ca(ICC2/PI489777)SNP_14699 | 654  | C | A | 14  | 24  | --    | --  |
| CakTC39709 | Ca(ICC2/PI489777)SNP_14700 | 881  | C | T | 30  | 17  | --    | --  |
| CakTC39226 | Ca(ICC2/PI489777)SNP_14701 | 1126 | T | G | 3   | 16  | --    | --  |
| CakTC35382 | Ca(ICC2/PI489777)SNP_14702 | 477  | G | C | 10  | 9   | --    | --  |
|            | Ca(ICC2/PI489777)SNP_14703 | 676  | T | G | 11  | 9   | --    | --  |
|            | Ca(ICC2/PI489777)SNP_14704 | 1194 | A | G | 17  | 4   | --    | --  |
|            | Ca(ICC2/PI489777)SNP_14705 | 1305 | G | A | 19  | 4   | --    | --  |
|            | Ca(ICC2/PI489777)SNP_14706 | 1854 | G | C | 24  | 5   | --    | --  |
|            | Ca(ICC2/PI489777)SNP_14707 | 2307 | A | G | 25  | 10  | --    | --  |
|            | Ca(ICC2/PI489777)SNP_14708 | 2550 | C | G | 19  | 9   | --    | --  |
|            | Ca(ICC2/PI489777)SNP_14709 | 2823 | A | G | 20  | 5   | --    | --  |
|            | Ca(ICC2/PI489777)SNP_14710 | 2998 | A | C | 24  | 8   | --    | --  |
|            | Ca(ICC2/PI489777)SNP_14711 | 3042 | A | G | 29  | 8   | --    | --  |
|            | Ca(ICC2/PI489777)SNP_14712 | 3078 | A | G | 25  | 7   | --    | --  |
|            | Ca(ICC2/PI489777)SNP_14713 | 3155 | T | C | 13  | 5   | --    | --  |
|            | Ca(ICC2/PI489777)SNP_14714 | 3165 | T | G | 13  | 3   | --    | --  |
|            | Ca(ICC2/PI489777)SNP_14715 | 3220 | T | C | 10  | 3   | --    | --  |
| CakTC37425 | Ca(ICC2/PI489777)SNP_14716 | 143  | G | A | 14  | 11  | --    | --  |
|            | Ca(ICC2/PI489777)SNP_14717 | 254  | G | C | 32  | 23  | --    | --  |
|            | Ca(ICC2/PI489777)SNP_14718 | 299  | T | C | 34  | 25  | --    | --  |
|            | Ca(ICC2/PI489777)SNP_14719 | 329  | C | T | 36  | 23  | --    | --  |
|            | Ca(ICC2/PI489777)SNP_14720 | 335  | G | A | 34  | 23  | --    | --  |
|            | Ca(ICC2/PI489777)SNP_14721 | 378  | T | C | 36  | 27  | --    | --  |

|            |                             |      |   |   |    |    |           |           |
|------------|-----------------------------|------|---|---|----|----|-----------|-----------|
|            | Ca(ICCV2/PI489777)SNP_14722 | 380  | T | A | 35 | 26 | --        | --        |
|            | Ca(ICCV2/PI489777)SNP_14723 | 559  | G | A | 32 | 21 | --        | --        |
|            | Ca(ICCV2/PI489777)SNP_14724 | 947  | A | G | 10 | 3  | --        | --        |
| CakTC24535 | Ca(ICCV2/PI489777)SNP_14725 | 226  | A | C | 13 | 13 | --        | --        |
|            | Ca(ICCV2/PI489777)SNP_14726 | 579  | T | C | 23 | 7  | --        | --        |
| CakTC42381 | Ca(ICCV2/PI489777)SNP_14727 | 486  | A | C | 3  | 4  | --        | --        |
|            | Ca(ICCV2/PI489777)SNP_14728 | 575  | G | T | 3  | 4  | --        | --        |
|            | Ca(ICCV2/PI489777)SNP_14729 | 651  | G | A | 3  | 3  | --        | --        |
|            | Ca(ICCV2/PI489777)SNP_14730 | 683  | T | C | 5  | 3  | --        | --        |
|            | Ca(ICCV2/PI489777)SNP_14731 | 737  | T | A | 4  | 3  | --        | --        |
| CakTC11386 | Ca(ICCV2/PI489777)SNP_14732 | 353  | A | G | 5  | 3  | --        | --        |
|            | Ca(ICCV2/PI489777)SNP_14733 | 1007 | C | T | 9  | 3  | --        | --        |
| CakTC32124 | Ca(ICCV2/PI489777)SNP_14734 | 373  | C | T | 10 | 4  | --        | AP2-EREBP |
|            | Ca(ICCV2/PI489777)SNP_14735 | 437  | C | T | 8  | 4  | --        | AP2-EREBP |
|            | Ca(ICCV2/PI489777)SNP_14736 | 476  | C | A | 13 | 3  | --        | AP2-EREBP |
|            | Ca(ICCV2/PI489777)SNP_14737 | 500  | A | G | 13 | 4  | --        | AP2-EREBP |
|            | Ca(ICCV2/PI489777)SNP_14738 | 734  | A | G | 10 | 3  | --        | AP2-EREBP |
| CakTC23317 | Ca(ICCV2/PI489777)SNP_14739 | 1894 | T | G | 35 | 9  | --        | --        |
| CakTC35600 | Ca(ICCV2/PI489777)SNP_14740 | 1219 | T | A | 9  | 20 | --        | TPR       |
|            | Ca(ICCV2/PI489777)SNP_14741 | 1872 | C | G | 14 | 7  | --        | TPR       |
|            | Ca(ICCV2/PI489777)SNP_14742 | 2181 | T | G | 14 | 8  | --        | TPR       |
|            | Ca(ICCV2/PI489777)SNP_14743 | 2995 | A | G | 8  | 5  | --        | TPR       |
|            | Ca(ICCV2/PI489777)SNP_14744 | 3095 | T | C | 8  | 3  | --        | TPR       |
| CakTC13550 | Ca(ICCV2/PI489777)SNP_14745 | 212  | A | C | 16 | 10 | --        | --        |
|            | Ca(ICCV2/PI489777)SNP_14746 | 293  | A | G | 20 | 11 | --        | --        |
| CakTC39946 | Ca(ICCV2/PI489777)SNP_14747 | 334  | C | T | 6  | 5  | --        | --        |
| CakTC30327 | Ca(ICCV2/PI489777)SNP_14748 | 257  | A | C | 3  | 6  | --        | --        |
|            | Ca(ICCV2/PI489777)SNP_14749 | 1596 | A | T | 6  | 3  | --        | --        |
|            | Ca(ICCV2/PI489777)SNP_14750 | 1599 | T | A | 7  | 3  | --        | --        |
| CakTC38359 | Ca(ICCV2/PI489777)SNP_14751 | 65   | A | C | 4  | 5  | --        | --        |
|            | Ca(ICCV2/PI489777)SNP_14752 | 984  | A | G | 39 | 8  | --        | --        |
| CakTC25609 | Ca(ICCV2/PI489777)SNP_14753 | 1029 | C | T | 7  | 5  | Young_pod | --        |
| CakTC37329 | Ca(ICCV2/PI489777)SNP_14754 | 501  | A | G | 12 | 3  | --        | --        |
| CakTC09397 | Ca(ICCV2/PI489777)SNP_14755 | 374  | C | T | 86 | 22 | --        | --        |
|            | Ca(ICCV2/PI489777)SNP_14756 | 445  | C | T | 65 | 18 | --        | --        |
| CakTC23888 | Ca(ICCV2/PI489777)SNP_14757 | 810  | T | C | 63 | 24 | --        | --        |
|            | Ca(ICCV2/PI489777)SNP_14758 | 3298 | A | C | 10 | 7  | --        | --        |
|            | Ca(ICCV2/PI489777)SNP_14759 | 4210 | C | T | 7  | 6  | --        | --        |
|            | Ca(ICCV2/PI489777)SNP_14760 | 4275 | C | T | 8  | 6  | --        | --        |
| CakTC38745 | Ca(ICCV2/PI489777)SNP_14761 | 1167 | A | C | 3  | 7  | --        | --        |
| CakTC23824 | Ca(ICCV2/PI489777)SNP_14762 | 5612 | A | G | 28 | 12 | --        | --        |
|            | Ca(ICCV2/PI489777)SNP_14763 | 5778 | G | A | 33 | 8  | --        | --        |
| CakTC25279 | Ca(ICCV2/PI489777)SNP_14764 | 1038 | G | A | 11 | 5  | --        | --        |
| CakTC38494 | Ca(ICCV2/PI489777)SNP_14765 | 85   | T | C | 19 | 9  | --        | --        |
|            | Ca(ICCV2/PI489777)SNP_14766 | 518  | C | A | 15 | 13 | --        | --        |
|            | Ca(ICCV2/PI489777)SNP_14767 | 741  | G | A | 17 | 11 | --        | --        |
| CakTC43155 | Ca(ICCV2/PI489777)SNP_14768 | 936  | G | T | 24 | 11 | --        | --        |
|            | Ca(ICCV2/PI489777)SNP_14769 | 945  | C | T | 22 | 12 | --        | --        |
| CakTC42999 | Ca(ICCV2/PI489777)SNP_14770 | 146  | G | T | 16 | 15 | --        | TUB       |
|            | Ca(ICCV2/PI489777)SNP_14771 | 720  | T | C | 29 | 12 | --        | TUB       |
|            | Ca(ICCV2/PI489777)SNP_14772 | 849  | A | G | 26 | 14 | --        | TUB       |
|            | Ca(ICCV2/PI489777)SNP_14773 | 960  | C | T | 26 | 13 | --        | TUB       |
| CakTC30748 | Ca(ICCV2/PI489777)SNP_14774 | 480  | G | C | 4  | 3  | --        | AP2-EREBP |
|            | Ca(ICCV2/PI489777)SNP_14775 | 614  | C | T | 7  | 7  | --        | AP2-EREBP |
|            | Ca(ICCV2/PI489777)SNP_14776 | 732  | C | T | 8  | 9  | --        | AP2-EREBP |
|            | Ca(ICCV2/PI489777)SNP_14777 | 1106 | G | A | 16 | 9  | --        | AP2-EREBP |
|            | Ca(ICCV2/PI489777)SNP_14778 | 1186 | G | T | 12 | 7  | --        | AP2-EREBP |
|            | Ca(ICCV2/PI489777)SNP_14779 | 1204 | C | G | 13 | 6  | --        | AP2-EREBP |
| CakTC31835 | Ca(ICCV2/PI489777)SNP_14780 | 616  | G | C | 17 | 19 | --        | --        |
| CakTC27266 | Ca(ICCV2/PI489777)SNP_14781 | 718  | C | T | 25 | 19 | --        | --        |
|            | Ca(ICCV2/PI489777)SNP_14782 | 1799 | G | A | 12 | 9  | --        | --        |
| CakTC41664 | Ca(ICCV2/PI489777)SNP_14783 | 140  | C | A | 14 | 16 | --        | --        |
| CakTC35229 | Ca(ICCV2/PI489777)SNP_14784 | 2010 | C | T | 9  | 3  | --        | --        |
| CakTC11632 | Ca(ICCV2/PI489777)SNP_14785 | 626  | C | T | 7  | 3  | --        | --        |
|            | Ca(ICCV2/PI489777)SNP_14786 | 673  | G | A | 7  | 4  | --        | --        |
| CakTC04245 | Ca(ICCV2/PI489777)SNP_14787 | 163  | T | C | 7  | 3  | --        | --        |
|            | Ca(ICCV2/PI489777)SNP_14788 | 272  | C | T | 8  | 4  | --        | --        |
|            | Ca(ICCV2/PI489777)SNP_14789 | 326  | T | C | 8  | 4  | --        | --        |
| CakTC28786 | Ca(ICCV2/PI489777)SNP_14790 | 529  | A | G | 8  | 5  | --        | ARID      |
|            | Ca(ICCV2/PI489777)SNP_14791 | 564  | G | T | 9  | 5  | --        | ARID      |
|            | Ca(ICCV2/PI489777)SNP_14792 | 709  | A | G | 10 | 8  | --        | ARID      |
|            | Ca(ICCV2/PI489777)SNP_14793 | 764  | G | A | 14 | 4  | --        | ARID      |
|            | Ca(ICCV2/PI489777)SNP_14794 | 962  | A | G | 21 | 7  | --        | ARID      |
|            | Ca(ICCV2/PI489777)SNP_14795 | 1134 | C | G | 14 | 5  | --        | ARID      |



|            |                            |      |   |   |    |    |           |      |
|------------|----------------------------|------|---|---|----|----|-----------|------|
| CakTC33599 | Ca(ICC2/PI489777)SNP_14796 | 143  | T | A | 10 | 6  | --        | --   |
|            | Ca(ICC2/PI489777)SNP_14797 | 436  | C | T | 34 | 15 | --        | --   |
|            | Ca(ICC2/PI489777)SNP_14798 | 1420 | T | A | 30 | 18 | --        | --   |
| CakTC35154 | Ca(ICC2/PI489777)SNP_14799 | 992  | A | G | 7  | 12 | --        | --   |
|            | Ca(ICC2/PI489777)SNP_14800 | 2129 | T | C | 8  | 3  | --        | --   |
| CakTC42505 | Ca(ICC2/PI489777)SNP_14801 | 193  | G | A | 19 | 18 | --        | --   |
|            | Ca(ICC2/PI489777)SNP_14802 | 211  | T | C | 22 | 17 | --        | --   |
|            | Ca(ICC2/PI489777)SNP_14803 | 373  | T | A | 18 | 22 | --        | --   |
|            | Ca(ICC2/PI489777)SNP_14804 | 442  | C | T | 8  | 26 | --        | --   |
|            | Ca(ICC2/PI489777)SNP_14805 | 523  | A | G | 7  | 28 | --        | --   |
| CakTC31522 | Ca(ICC2/PI489777)SNP_14806 | 381  | C | T | 6  | 3  | --        | --   |
|            | Ca(ICC2/PI489777)SNP_14807 | 393  | T | C | 5  | 3  | --        | --   |
|            | Ca(ICC2/PI489777)SNP_14808 | 408  | T | A | 5  | 5  | --        | --   |
|            | Ca(ICC2/PI489777)SNP_14809 | 658  | A | G | 4  | 5  | --        | --   |
|            | Ca(ICC2/PI489777)SNP_14810 | 717  | A | G | 4  | 5  | --        | --   |
| CakTC39349 | Ca(ICC2/PI489777)SNP_14811 | 154  | A | G | 7  | 3  | --        | --   |
|            | Ca(ICC2/PI489777)SNP_14812 | 432  | T | C | 3  | 3  | --        | --   |
| CakTC09093 | Ca(ICC2/PI489777)SNP_14813 | 1465 | A | C | 19 | 8  | --        | --   |
|            | Ca(ICC2/PI489777)SNP_14814 | 2102 | G | A | 8  | 6  | --        | --   |
| CakTC22531 | Ca(ICC2/PI489777)SNP_14815 | 200  | G | A | 4  | 3  | Young_pod | --   |
| CakTC35577 | Ca(ICC2/PI489777)SNP_14816 | 263  | G | A | 22 | 4  | --        | --   |
|            | Ca(ICC2/PI489777)SNP_14817 | 432  | T | A | 21 | 8  | --        | --   |
|            | Ca(ICC2/PI489777)SNP_14818 | 443  | C | T | 22 | 10 | --        | --   |
|            | Ca(ICC2/PI489777)SNP_14819 | 798  | C | A | 11 | 9  | --        | --   |
|            | Ca(ICC2/PI489777)SNP_14820 | 2308 | T | C | 15 | 5  | --        | --   |
|            | Ca(ICC2/PI489777)SNP_14821 | 4010 | C | T | 37 | 6  | --        | --   |
| CakTC29248 | Ca(ICC2/PI489777)SNP_14822 | 181  | G | A | 15 | 4  | --        | --   |
|            | Ca(ICC2/PI489777)SNP_14823 | 187  | T | C | 14 | 4  | --        | --   |
|            | Ca(ICC2/PI489777)SNP_14824 | 205  | A | C | 16 | 4  | --        | --   |
|            | Ca(ICC2/PI489777)SNP_14825 | 1564 | C | A | 24 | 4  | --        | --   |
| CakTC34147 | Ca(ICC2/PI489777)SNP_14826 | 1854 | A | C | 10 | 14 | --        | --   |
| CakTC29513 | Ca(ICC2/PI489777)SNP_14827 | 578  | G | T | 3  | 8  | --        | --   |
|            | Ca(ICC2/PI489777)SNP_14828 | 1305 | C | T | 4  | 14 | --        | --   |
| CakTC30905 | Ca(ICC2/PI489777)SNP_14829 | 455  | C | T | 9  | 3  | --        | --   |
|            | Ca(ICC2/PI489777)SNP_14830 | 605  | A | T | 10 | 5  | --        | --   |
|            | Ca(ICC2/PI489777)SNP_14831 | 1745 | A | T | 3  | 3  | --        | --   |
| CakTC40014 | Ca(ICC2/PI489777)SNP_14832 | 446  | T | C | 4  | 4  | --        | GRAS |
| CakTC25820 | Ca(ICC2/PI489777)SNP_14833 | 1977 | G | T | 5  | 4  | --        | --   |
|            | Ca(ICC2/PI489777)SNP_14834 | 2193 | C | T | 6  | 6  | --        | --   |
|            | Ca(ICC2/PI489777)SNP_14835 | 2199 | T | C | 6  | 6  | --        | --   |
|            | Ca(ICC2/PI489777)SNP_14836 | 2319 | G | A | 9  | 4  | --        | --   |
|            | Ca(ICC2/PI489777)SNP_14837 | 2583 | T | A | 20 | 6  | --        | --   |
|            | Ca(ICC2/PI489777)SNP_14838 | 2676 | A | G | 16 | 5  | --        | --   |
|            | Ca(ICC2/PI489777)SNP_14839 | 2925 | A | C | 7  | 9  | --        | --   |
|            | Ca(ICC2/PI489777)SNP_14840 | 3067 | T | C | 11 | 14 | --        | --   |
|            | Ca(ICC2/PI489777)SNP_14841 | 3084 | G | A | 13 | 10 | --        | --   |
|            | Ca(ICC2/PI489777)SNP_14842 | 3144 | C | T | 19 | 13 | --        | --   |
|            | Ca(ICC2/PI489777)SNP_14843 | 3174 | C | T | 18 | 14 | --        | --   |
|            | Ca(ICC2/PI489777)SNP_14844 | 3216 | T | C | 20 | 11 | --        | --   |
|            | Ca(ICC2/PI489777)SNP_14845 | 3217 | A | G | 20 | 11 | --        | --   |
|            | Ca(ICC2/PI489777)SNP_14846 | 3309 | T | C | 19 | 11 | --        | --   |
|            | Ca(ICC2/PI489777)SNP_14847 | 3363 | T | C | 17 | 10 | --        | --   |
|            | Ca(ICC2/PI489777)SNP_14848 | 3507 | C | T | 9  | 8  | --        | --   |
|            | Ca(ICC2/PI489777)SNP_14849 | 4014 | G | C | 11 | 5  | --        | --   |
| CakTC26946 | Ca(ICC2/PI489777)SNP_14850 | 202  | T | C | 11 | 3  | --        | --   |
|            | Ca(ICC2/PI489777)SNP_14851 | 669  | T | C | 15 | 10 | --        | --   |
| CakTC30551 | Ca(ICC2/PI489777)SNP_14852 | 565  | C | A | 8  | 3  | --        | --   |
|            | Ca(ICC2/PI489777)SNP_14853 | 879  | C | A | 10 | 4  | --        | --   |
| CakTC25226 | Ca(ICC2/PI489777)SNP_14854 | 936  | T | C | 5  | 4  | --        | --   |
| CakTC12598 | Ca(ICC2/PI489777)SNP_14855 | 71   | T | C | 3  | 9  | --        | --   |
|            | Ca(ICC2/PI489777)SNP_14856 | 569  | A | G | 26 | 52 | --        | --   |
|            | Ca(ICC2/PI489777)SNP_14857 | 727  | A | T | 47 | 48 | --        | --   |
|            | Ca(ICC2/PI489777)SNP_14858 | 988  | A | G | 28 | 39 | --        | --   |
|            | Ca(ICC2/PI489777)SNP_14859 | 1197 | C | G | 11 | 19 | --        | --   |
|            | Ca(ICC2/PI489777)SNP_14860 | 1205 | C | A | 8  | 18 | --        | --   |
| CakTC26420 | Ca(ICC2/PI489777)SNP_14861 | 385  | G | A | 6  | 3  | Shoot     | --   |
|            | Ca(ICC2/PI489777)SNP_14862 | 409  | G | A | 6  | 3  | Shoot     | --   |
|            | Ca(ICC2/PI489777)SNP_14863 | 563  | G | A | 7  | 4  | Shoot     | --   |
| CakTC37709 | Ca(ICC2/PI489777)SNP_14864 | 270  | G | A | 69 | 29 | --        | --   |
| CakTC23035 | Ca(ICC2/PI489777)SNP_14865 | 1247 | A | G | 99 | 62 | --        | --   |
| CakTC41331 | Ca(ICC2/PI489777)SNP_14866 | 2209 | A | G | 34 | 18 | --        | --   |
|            | Ca(ICC2/PI489777)SNP_14867 | 2381 | A | G | 24 | 11 | --        | --   |
| CakTC42038 | Ca(ICC2/PI489777)SNP_14868 | 172  | G | A | 5  | 5  | --        | --   |
|            | Ca(ICC2/PI489777)SNP_14869 | 190  | A | G | 5  | 5  | --        | --   |

|            |                            |      |   |   |     |     |           |    |
|------------|----------------------------|------|---|---|-----|-----|-----------|----|
|            | Ca(ICC2/PI489777)SNP_14870 | 221  | G | T | 5   | 5   | --        | -- |
|            | Ca(ICC2/PI489777)SNP_14871 | 390  | G | A | 7   | 11  | --        | -- |
| CakTC30131 | Ca(ICC2/PI489777)SNP_14872 | 729  | G | A | 186 | 114 | --        | -- |
|            | Ca(ICC2/PI489777)SNP_14873 | 810  | G | A | 106 | 63  | --        | -- |
|            | Ca(ICC2/PI489777)SNP_14874 | 820  | T | G | 99  | 58  | --        | -- |
|            | Ca(ICC2/PI489777)SNP_14875 | 835  | C | T | 53  | 42  | --        | -- |
|            | Ca(ICC2/PI489777)SNP_14876 | 989  | T | C | 10  | 3   | --        | -- |
| CakTC09847 | Ca(ICC2/PI489777)SNP_14877 | 327  | G | A | 3   | 3   | --        | -- |
| CakTC23530 | Ca(ICC2/PI489777)SNP_14878 | 456  | G | A | 46  | 15  | --        | -- |
| CakTC31132 | Ca(ICC2/PI489777)SNP_14879 | 355  | C | T | 3   | 3   | --        | -- |
|            | Ca(ICC2/PI489777)SNP_14880 | 406  | A | G | 4   | 3   | --        | -- |
|            | Ca(ICC2/PI489777)SNP_14881 | 556  | C | T | 3   | 3   | --        | -- |
|            | Ca(ICC2/PI489777)SNP_14882 | 613  | T | C | 3   | 3   | --        | -- |
|            | Ca(ICC2/PI489777)SNP_14883 | 918  | C | T | 3   | 5   | --        | -- |
| CakTC33239 | Ca(ICC2/PI489777)SNP_14884 | 438  | C | G | 3   | 3   | --        | -- |
| CakTC43258 | Ca(ICC2/PI489777)SNP_14885 | 498  | A | G | 17  | 4   | --        | -- |
|            | Ca(ICC2/PI489777)SNP_14886 | 960  | A | G | 14  | 15  | --        | -- |
|            | Ca(ICC2/PI489777)SNP_14887 | 1016 | G | A | 21  | 19  | --        | -- |
|            | Ca(ICC2/PI489777)SNP_14888 | 1083 | T | C | 20  | 20  | --        | -- |
|            | Ca(ICC2/PI489777)SNP_14889 | 1201 | T | C | 16  | 22  | --        | -- |
|            | Ca(ICC2/PI489777)SNP_14890 | 1457 | C | G | 22  | 11  | --        | -- |
|            | Ca(ICC2/PI489777)SNP_14891 | 1563 | C | T | 16  | 9   | --        | -- |
| CakTC30386 | Ca(ICC2/PI489777)SNP_14892 | 2306 | A | G | 3   | 4   | Young_pod | -- |
| CakTC24122 | Ca(ICC2/PI489777)SNP_14893 | 434  | C | G | 5   | 14  | Root      | -- |
|            | Ca(ICC2/PI489777)SNP_14894 | 446  | A | T | 6   | 14  | Root      | -- |
|            | Ca(ICC2/PI489777)SNP_14895 | 551  | T | G | 6   | 16  | Root      | -- |
|            | Ca(ICC2/PI489777)SNP_14896 | 626  | A | G | 3   | 15  | Root      | -- |
| CakTC21947 | Ca(ICC2/PI489777)SNP_14897 | 3584 | A | T | 3   | 6   | --        | -- |
|            | Ca(ICC2/PI489777)SNP_14898 | 3746 | A | C | 3   | 3   | --        | -- |
| CakTC43011 | Ca(ICC2/PI489777)SNP_14899 | 194  | C | T | 13  | 3   | --        | -- |
|            | Ca(ICC2/PI489777)SNP_14900 | 586  | C | T | 12  | 4   | --        | -- |
|            | Ca(ICC2/PI489777)SNP_14901 | 2222 | G | A | 4   | 10  | --        | -- |
|            | Ca(ICC2/PI489777)SNP_14902 | 2657 | C | T | 9   | 6   | --        | -- |
| CakTC28324 | Ca(ICC2/PI489777)SNP_14903 | 548  | C | T | 4   | 3   | --        | -- |
| CakTC42495 | Ca(ICC2/PI489777)SNP_14904 | 282  | A | T | 15  | 14  | --        | -- |
| CakTC25533 | Ca(ICC2/PI489777)SNP_14905 | 604  | A | G | 17  | 9   | --        | -- |
|            | Ca(ICC2/PI489777)SNP_14906 | 640  | A | G | 20  | 9   | --        | -- |
|            | Ca(ICC2/PI489777)SNP_14907 | 737  | A | G | 21  | 10  | --        | -- |
|            | Ca(ICC2/PI489777)SNP_14908 | 974  | T | C | 25  | 15  | --        | -- |
|            | Ca(ICC2/PI489777)SNP_14909 | 980  | C | T | 11  | 10  | --        | -- |
|            | Ca(ICC2/PI489777)SNP_14910 | 1079 | C | T | 23  | 17  | --        | -- |
| CakTC41884 | Ca(ICC2/PI489777)SNP_14911 | 216  | C | A | 10  | 4   | --        | -- |
|            | Ca(ICC2/PI489777)SNP_14912 | 242  | A | T | 15  | 5   | --        | -- |
|            | Ca(ICC2/PI489777)SNP_14913 | 381  | T | C | 36  | 13  | --        | -- |
|            | Ca(ICC2/PI489777)SNP_14914 | 513  | G | A | 32  | 16  | --        | -- |
|            | Ca(ICC2/PI489777)SNP_14915 | 900  | C | A | 24  | 5   | --        | -- |
|            | Ca(ICC2/PI489777)SNP_14916 | 1347 | C | A | 10  | 14  | --        | -- |
|            | Ca(ICC2/PI489777)SNP_14917 | 1407 | G | T | 15  | 14  | --        | -- |
|            | Ca(ICC2/PI489777)SNP_14918 | 1510 | G | A | 17  | 18  | --        | -- |
|            | Ca(ICC2/PI489777)SNP_14919 | 1730 | A | C | 9   | 15  | --        | -- |
| CakTC27745 | Ca(ICC2/PI489777)SNP_14920 | 87   | C | T | 7   | 17  | --        | -- |
|            | Ca(ICC2/PI489777)SNP_14921 | 109  | G | A | 8   | 17  | --        | -- |
|            | Ca(ICC2/PI489777)SNP_14922 | 205  | T | G | 10  | 17  | --        | -- |
|            | Ca(ICC2/PI489777)SNP_14923 | 216  | T | C | 13  | 17  | --        | -- |
|            | Ca(ICC2/PI489777)SNP_14924 | 252  | T | C | 13  | 17  | --        | -- |
|            | Ca(ICC2/PI489777)SNP_14925 | 255  | T | C | 14  | 17  | --        | -- |
|            | Ca(ICC2/PI489777)SNP_14926 | 312  | A | G | 13  | 18  | --        | -- |
|            | Ca(ICC2/PI489777)SNP_14927 | 376  | G | C | 17  | 19  | --        | -- |
|            | Ca(ICC2/PI489777)SNP_14928 | 1150 | C | A | 9   | 7   | --        | -- |
|            | Ca(ICC2/PI489777)SNP_14929 | 1645 | C | A | 21  | 10  | --        | -- |
|            | Ca(ICC2/PI489777)SNP_14930 | 1815 | T | C | 24  | 8   | --        | -- |
| CakTC27121 | Ca(ICC2/PI489777)SNP_14931 | 2201 | T | C | 6   | 3   | --        | -- |
| CakTC38121 | Ca(ICC2/PI489777)SNP_14932 | 424  | C | G | 20  | 39  | --        | -- |
|            | Ca(ICC2/PI489777)SNP_14933 | 616  | T | C | 22  | 27  | --        | -- |
|            | Ca(ICC2/PI489777)SNP_14934 | 1500 | A | G | 6   | 6   | --        | -- |
| CakTC43125 | Ca(ICC2/PI489777)SNP_14935 | 507  | A | G | 13  | 15  | --        | -- |
|            | Ca(ICC2/PI489777)SNP_14936 | 749  | C | T | 35  | 11  | --        | -- |
|            | Ca(ICC2/PI489777)SNP_14937 | 974  | C | T | 35  | 10  | --        | -- |
|            | Ca(ICC2/PI489777)SNP_14938 | 1230 | T | C | 17  | 7   | --        | -- |
|            | Ca(ICC2/PI489777)SNP_14939 | 1461 | A | G | 34  | 17  | --        | -- |
|            | Ca(ICC2/PI489777)SNP_14940 | 1711 | G | A | 16  | 8   | --        | -- |
| CakTC40968 | Ca(ICC2/PI489777)SNP_14941 | 623  | T | C | 6   | 6   | --        | -- |
|            | Ca(ICC2/PI489777)SNP_14942 | 1977 | A | T | 7   | 9   | --        | -- |
| CakTC08642 | Ca(ICC2/PI489777)SNP_14943 | 110  | A | C | 4   | 4   | --        | -- |

|            |                            |      |   |   |    |    |    |      |
|------------|----------------------------|------|---|---|----|----|----|------|
|            | Ca(ICC2/PI489777)SNP_14944 | 135  | G | A | 4  | 4  | -- | --   |
|            | Ca(ICC2/PI489777)SNP_14945 | 141  | T | G | 4  | 3  | -- | --   |
|            | Ca(ICC2/PI489777)SNP_14946 | 181  | T | A | 4  | 3  | -- | --   |
|            | Ca(ICC2/PI489777)SNP_14947 | 937  | C | T | 3  | 5  | -- | --   |
|            | Ca(ICC2/PI489777)SNP_14948 | 949  | G | A | 3  | 3  | -- | --   |
|            | Ca(ICC2/PI489777)SNP_14949 | 1734 | T | G | 4  | 9  | -- | --   |
|            | Ca(ICC2/PI489777)SNP_14950 | 1846 | G | A | 4  | 9  | -- | --   |
|            | Ca(ICC2/PI489777)SNP_14951 | 2067 | T | C | 4  | 5  | -- | --   |
| CakTC38548 | Ca(ICC2/PI489777)SNP_14952 | 352  | C | T | 5  | 3  | -- | --   |
| CakTC27592 | Ca(ICC2/PI489777)SNP_14953 | 2724 | A | G | 4  | 5  | -- | SET  |
| CakTC31885 | Ca(ICC2/PI489777)SNP_14954 | 312  | G | A | 11 | 5  | -- | --   |
|            | Ca(ICC2/PI489777)SNP_14955 | 641  | T | C | 15 | 10 | -- | --   |
|            | Ca(ICC2/PI489777)SNP_14956 | 693  | T | C | 19 | 7  | -- | --   |
|            | Ca(ICC2/PI489777)SNP_14957 | 987  | T | C | 15 | 6  | -- | --   |
|            | Ca(ICC2/PI489777)SNP_14958 | 1332 | A | T | 13 | 7  | -- | --   |
|            | Ca(ICC2/PI489777)SNP_14959 | 2130 | G | A | 6  | 4  | -- | --   |
|            | Ca(ICC2/PI489777)SNP_14960 | 2361 | C | A | 8  | 8  | -- | --   |
|            | Ca(ICC2/PI489777)SNP_14961 | 2450 | A | G | 9  | 9  | -- | --   |
|            | Ca(ICC2/PI489777)SNP_14962 | 2715 | C | T | 5  | 6  | -- | --   |
|            | Ca(ICC2/PI489777)SNP_14963 | 3336 | T | C | 10 | 7  | -- | --   |
|            | Ca(ICC2/PI489777)SNP_14964 | 3375 | C | T | 10 | 8  | -- | --   |
|            | Ca(ICC2/PI489777)SNP_14965 | 3381 | T | G | 8  | 8  | -- | --   |
|            | Ca(ICC2/PI489777)SNP_14966 | 3454 | G | A | 6  | 9  | -- | --   |
|            | Ca(ICC2/PI489777)SNP_14967 | 4634 | T | C | 17 | 6  | -- | --   |
|            | Ca(ICC2/PI489777)SNP_14968 | 4752 | A | T | 15 | 8  | -- | --   |
|            | Ca(ICC2/PI489777)SNP_14969 | 4797 | A | G | 14 | 9  | -- | --   |
|            | Ca(ICC2/PI489777)SNP_14970 | 5442 | C | T | 14 | 13 | -- | --   |
|            | Ca(ICC2/PI489777)SNP_14971 | 5461 | A | G | 12 | 13 | -- | --   |
|            | Ca(ICC2/PI489777)SNP_14972 | 5745 | A | T | 13 | 9  | -- | --   |
|            | Ca(ICC2/PI489777)SNP_14973 | 6087 | C | T | 20 | 11 | -- | --   |
|            | Ca(ICC2/PI489777)SNP_14974 | 6873 | A | G | 12 | 6  | -- | --   |
|            | Ca(ICC2/PI489777)SNP_14975 | 7491 | G | A | 20 | 12 | -- | --   |
|            | Ca(ICC2/PI489777)SNP_14976 | 7680 | C | T | 20 | 7  | -- | --   |
|            | Ca(ICC2/PI489777)SNP_14977 | 7935 | A | G | 20 | 15 | -- | --   |
|            | Ca(ICC2/PI489777)SNP_14978 | 7998 | A | G | 21 | 12 | -- | --   |
|            | Ca(ICC2/PI489777)SNP_14979 | 8362 | T | C | 19 | 23 | -- | --   |
|            | Ca(ICC2/PI489777)SNP_14980 | 8645 | G | C | 11 | 9  | -- | --   |
| CakTC26718 | Ca(ICC2/PI489777)SNP_14981 | 101  | C | G | 11 | 13 | -- | --   |
|            | Ca(ICC2/PI489777)SNP_14982 | 109  | G | A | 14 | 14 | -- | --   |
| CakTC29488 | Ca(ICC2/PI489777)SNP_14983 | 793  | C | T | 4  | 8  | -- | --   |
| CakTC38753 | Ca(ICC2/PI489777)SNP_14984 | 1118 | T | C | 41 | 31 | -- | HB   |
| CakTC38179 | Ca(ICC2/PI489777)SNP_14985 | 124  | C | T | 15 | 6  | -- | --   |
|            | Ca(ICC2/PI489777)SNP_14986 | 419  | C | T | 18 | 11 | -- | --   |
|            | Ca(ICC2/PI489777)SNP_14987 | 734  | C | T | 23 | 14 | -- | --   |
| CakTC37334 | Ca(ICC2/PI489777)SNP_14988 | 77   | T | C | 24 | 13 | -- | --   |
|            | Ca(ICC2/PI489777)SNP_14989 | 141  | A | G | 54 | 32 | -- | --   |
|            | Ca(ICC2/PI489777)SNP_14990 | 351  | A | G | 77 | 36 | -- | --   |
|            | Ca(ICC2/PI489777)SNP_14991 | 1024 | T | C | 20 | 16 | -- | --   |
|            | Ca(ICC2/PI489777)SNP_14992 | 1043 | A | G | 12 | 9  | -- | --   |
| CakTC40579 | Ca(ICC2/PI489777)SNP_14993 | 930  | A | G | 26 | 11 | -- | --   |
|            | Ca(ICC2/PI489777)SNP_14994 | 960  | C | T | 24 | 11 | -- | --   |
|            | Ca(ICC2/PI489777)SNP_14995 | 984  | T | C | 25 | 9  | -- | --   |
|            | Ca(ICC2/PI489777)SNP_14996 | 1014 | G | T | 20 | 7  | -- | --   |
|            | Ca(ICC2/PI489777)SNP_14997 | 1045 | A | T | 24 | 9  | -- | --   |
|            | Ca(ICC2/PI489777)SNP_14998 | 1061 | A | T | 24 | 9  | -- | --   |
|            | Ca(ICC2/PI489777)SNP_14999 | 1143 | T | C | 16 | 7  | -- | --   |
|            | Ca(ICC2/PI489777)SNP_15000 | 1158 | T | A | 18 | 7  | -- | --   |
|            | Ca(ICC2/PI489777)SNP_15001 | 1164 | A | T | 19 | 7  | -- | --   |
|            | Ca(ICC2/PI489777)SNP_15002 | 1281 | A | G | 18 | 5  | -- | --   |
|            | Ca(ICC2/PI489777)SNP_15003 | 1689 | C | T | 17 | 8  | -- | --   |
| CakTC36828 | Ca(ICC2/PI489777)SNP_15004 | 187  | A | G | 19 | 9  | -- | --   |
|            | Ca(ICC2/PI489777)SNP_15005 | 334  | C | T | 30 | 12 | -- | --   |
|            | Ca(ICC2/PI489777)SNP_15006 | 394  | G | A | 24 | 6  | -- | --   |
|            | Ca(ICC2/PI489777)SNP_15007 | 2211 | A | G | 42 | 41 | -- | --   |
|            | Ca(ICC2/PI489777)SNP_15008 | 2297 | T | G | 35 | 40 | -- | --   |
|            | Ca(ICC2/PI489777)SNP_15009 | 2355 | C | T | 30 | 24 | -- | --   |
| CakTC29481 | Ca(ICC2/PI489777)SNP_15010 | 103  | G | A | 40 | 7  | -- | --   |
|            | Ca(ICC2/PI489777)SNP_15011 | 369  | G | A | 42 | 12 | -- | --   |
| CakTC36634 | Ca(ICC2/PI489777)SNP_15012 | 96   | C | T | 25 | 9  | -- | TRAF |
|            | Ca(ICC2/PI489777)SNP_15013 | 298  | T | C | 29 | 13 | -- | TRAF |
|            | Ca(ICC2/PI489777)SNP_15014 | 667  | C | T | 9  | 4  | -- | TRAF |
| CakTC28301 | Ca(ICC2/PI489777)SNP_15015 | 311  | A | G | 4  | 5  | -- | --   |
|            | Ca(ICC2/PI489777)SNP_15016 | 491  | C | T | 14 | 4  | -- | --   |
|            | Ca(ICC2/PI489777)SNP_15017 | 517  | C | T | 13 | 4  | -- | --   |

|            |                            |      |   |   |     |     |        |      |
|------------|----------------------------|------|---|---|-----|-----|--------|------|
|            | Ca(ICC2/PI489777)SNP_15018 | 524  | A | G | 15  | 4   | --     | --   |
|            | Ca(ICC2/PI489777)SNP_15019 | 670  | C | T | 8   | 3   | --     | --   |
| CakTC28390 | Ca(ICC2/PI489777)SNP_15020 | 664  | G | A | 8   | 4   | --     | --   |
|            | Ca(ICC2/PI489777)SNP_15021 | 673  | A | G | 10  | 4   | --     | --   |
|            | Ca(ICC2/PI489777)SNP_15022 | 1117 | A | G | 11  | 11  | --     | --   |
|            | Ca(ICC2/PI489777)SNP_15023 | 1177 | A | G | 18  | 13  | --     | --   |
| CakTC26180 | Ca(ICC2/PI489777)SNP_15024 | 479  | T | C | 148 | 128 | --     | --   |
| CakTC24380 | Ca(ICC2/PI489777)SNP_15025 | 1486 | A | G | 18  | 4   | Flower | bud  |
|            | Ca(ICC2/PI489777)SNP_15026 | 1555 | A | C | 13  | 4   | Flower | bud  |
|            | Ca(ICC2/PI489777)SNP_15027 | 1603 | C | G | 15  | 5   | Flower | bud  |
|            | Ca(ICC2/PI489777)SNP_15028 | 1693 | C | T | 15  | 6   | Flower | bud  |
|            | Ca(ICC2/PI489777)SNP_15029 | 1796 | G | A | 12  | 6   | Flower | bud  |
| CakTC05710 | Ca(ICC2/PI489777)SNP_15030 | 259  | T | C | 3   | 3   | --     | --   |
| CakTC25339 | Ca(ICC2/PI489777)SNP_15031 | 1394 | T | C | 14  | 3   | --     | --   |
|            | Ca(ICC2/PI489777)SNP_15032 | 1898 | G | A | 20  | 6   | --     | --   |
|            | Ca(ICC2/PI489777)SNP_15033 | 2952 | A | T | 7   | 13  | --     | --   |
|            | Ca(ICC2/PI489777)SNP_15034 | 3296 | G | A | 20  | 22  | --     | --   |
|            | Ca(ICC2/PI489777)SNP_15035 | 3496 | G | T | 13  | 13  | --     | --   |
|            | Ca(ICC2/PI489777)SNP_15036 | 4334 | G | A | 6   | 10  | --     | --   |
|            | Ca(ICC2/PI489777)SNP_15037 | 4376 | A | G | 8   | 11  | --     | --   |
|            | Ca(ICC2/PI489777)SNP_15038 | 4685 | G | A | 14  | 9   | --     | --   |
|            | Ca(ICC2/PI489777)SNP_15039 | 4722 | A | G | 11  | 6   | --     | --   |
| CakTC31648 | Ca(ICC2/PI489777)SNP_15040 | 291  | A | C | 10  | 6   | --     | bZIP |
| CakTC32857 | Ca(ICC2/PI489777)SNP_15041 | 245  | T | C | 4   | 5   | --     | --   |
| CakTC36987 | Ca(ICC2/PI489777)SNP_15042 | 80   | A | G | 3   | 7   | --     | --   |
| CakTC37502 | Ca(ICC2/PI489777)SNP_15043 | 346  | C | T | 20  | 4   | --     | --   |
|            | Ca(ICC2/PI489777)SNP_15044 | 373  | G | C | 16  | 6   | --     | --   |
|            | Ca(ICC2/PI489777)SNP_15045 | 763  | A | G | 13  | 4   | --     | --   |
|            | Ca(ICC2/PI489777)SNP_15046 | 978  | T | C | 9   | 3   | --     | --   |
| CakTC30217 | Ca(ICC2/PI489777)SNP_15047 | 135  | T | C | 14  | 14  | --     | --   |
|            | Ca(ICC2/PI489777)SNP_15048 | 280  | T | C | 39  | 26  | --     | --   |
|            | Ca(ICC2/PI489777)SNP_15049 | 656  | C | A | 26  | 16  | --     | --   |
|            | Ca(ICC2/PI489777)SNP_15050 | 1066 | T | C | 17  | 19  | --     | --   |
|            | Ca(ICC2/PI489777)SNP_15051 | 1169 | T | A | 18  | 25  | --     | --   |
|            | Ca(ICC2/PI489777)SNP_15052 | 1714 | C | T | 18  | 20  | --     | --   |
|            | Ca(ICC2/PI489777)SNP_15053 | 1825 | G | A | 23  | 26  | --     | --   |
|            | Ca(ICC2/PI489777)SNP_15054 | 2458 | C | T | 12  | 9   | --     | --   |
|            | Ca(ICC2/PI489777)SNP_15055 | 2473 | T | G | 15  | 11  | --     | --   |
|            | Ca(ICC2/PI489777)SNP_15056 | 2554 | C | T | 18  | 9   | --     | --   |
| CakTC33285 | Ca(ICC2/PI489777)SNP_15057 | 445  | G | T | 17  | 70  | --     | MBFI |
| CakTC25422 | Ca(ICC2/PI489777)SNP_15058 | 110  | G | A | 12  | 11  | --     | --   |
|            | Ca(ICC2/PI489777)SNP_15059 | 307  | A | G | 30  | 47  | --     | --   |
| CakTC02740 | Ca(ICC2/PI489777)SNP_15060 | 516  | G | T | 33  | 14  | --     | --   |
| CakTC38694 | Ca(ICC2/PI489777)SNP_15061 | 1152 | A | G | 3   | 6   | --     | --   |
|            | Ca(ICC2/PI489777)SNP_15062 | 1222 | C | G | 5   | 5   | --     | --   |
| CakTC40750 | Ca(ICC2/PI489777)SNP_15063 | 306  | T | A | 13  | 15  | --     | --   |
|            | Ca(ICC2/PI489777)SNP_15064 | 542  | A | G | 19  | 9   | --     | --   |
|            | Ca(ICC2/PI489777)SNP_15065 | 691  | C | T | 18  | 3   | --     | --   |
|            | Ca(ICC2/PI489777)SNP_15066 | 1329 | A | G | 13  | 10  | --     | --   |
|            | Ca(ICC2/PI489777)SNP_15067 | 1435 | A | C | 21  | 11  | --     | --   |
| CakTC00750 | Ca(ICC2/PI489777)SNP_15068 | 297  | T | A | 3   | 17  | --     | --   |
|            | Ca(ICC2/PI489777)SNP_15069 | 1316 | G | A | 7   | 10  | --     | --   |
|            | Ca(ICC2/PI489777)SNP_15070 | 1376 | A | G | 11  | 12  | --     | --   |
|            | Ca(ICC2/PI489777)SNP_15071 | 1400 | T | G | 12  | 11  | --     | --   |
|            | Ca(ICC2/PI489777)SNP_15072 | 1424 | A | G | 11  | 10  | --     | --   |
| CakTC37479 | Ca(ICC2/PI489777)SNP_15073 | 605  | C | G | 5   | 5   | --     | --   |
| CakTC40920 | Ca(ICC2/PI489777)SNP_15074 | 69   | C | G | 5   | 4   | --     | --   |
|            | Ca(ICC2/PI489777)SNP_15075 | 1299 | T | C | 6   | 5   | --     | --   |
|            | Ca(ICC2/PI489777)SNP_15076 | 1302 | C | G | 6   | 5   | --     | --   |
|            | Ca(ICC2/PI489777)SNP_15077 | 1494 | T | C | 5   | 3   | --     | --   |
| CakTC09937 | Ca(ICC2/PI489777)SNP_15078 | 363  | T | C | 4   | 3   | --     | --   |
|            | Ca(ICC2/PI489777)SNP_15079 | 511  | T | C | 4   | 5   | --     | --   |
| CakTC34963 | Ca(ICC2/PI489777)SNP_15080 | 1739 | G | A | 10  | 5   | --     | --   |
|            | Ca(ICC2/PI489777)SNP_15081 | 2145 | G | A | 3   | 3   | --     | --   |
|            | Ca(ICC2/PI489777)SNP_15082 | 2397 | G | A | 9   | 7   | --     | --   |
|            | Ca(ICC2/PI489777)SNP_15083 | 2537 | G | A | 10  | 7   | --     | --   |
|            | Ca(ICC2/PI489777)SNP_15084 | 2997 | G | A | 10  | 4   | --     | --   |
| CakTC41448 | Ca(ICC2/PI489777)SNP_15085 | 141  | A | G | 38  | 40  | --     | --   |
|            | Ca(ICC2/PI489777)SNP_15086 | 384  | A | G | 47  | 54  | --     | --   |
|            | Ca(ICC2/PI489777)SNP_15087 | 624  | A | T | 19  | 27  | --     | --   |
|            | Ca(ICC2/PI489777)SNP_15088 | 651  | A | G | 18  | 21  | --     | --   |
|            | Ca(ICC2/PI489777)SNP_15089 | 690  | G | A | 9   | 15  | --     | --   |
| CakTC28256 | Ca(ICC2/PI489777)SNP_15090 | 816  | C | T | 48  | 14  | --     | --   |
|            | Ca(ICC2/PI489777)SNP_15091 | 849  | C | T | 51  | 11  | --     | --   |

|            |                            |      |   |   |     |    |        |     |
|------------|----------------------------|------|---|---|-----|----|--------|-----|
|            | Ca(ICC2/PI489777)SNP_15092 | 891  | A | G | 48  | 10 | --     | --  |
|            | Ca(ICC2/PI489777)SNP_15093 | 1134 | G | T | 26  | 11 | --     | --  |
|            | Ca(ICC2/PI489777)SNP_15094 | 1149 | A | G | 28  | 9  | --     | --  |
|            | Ca(ICC2/PI489777)SNP_15095 | 1182 | C | T | 26  | 10 | --     | --  |
| CakTC37108 | Ca(ICC2/PI489777)SNP_15096 | 3031 | T | G | 5   | 9  | --     | --  |
|            | Ca(ICC2/PI489777)SNP_15097 | 3811 | T | C | 11  | 5  | --     | --  |
| CakTC25668 | Ca(ICC2/PI489777)SNP_15098 | 928  | T | G | 11  | 4  | --     | --  |
|            | Ca(ICC2/PI489777)SNP_15099 | 1142 | G | A | 10  | 5  | --     | --  |
| CakTC11017 | Ca(ICC2/PI489777)SNP_15100 | 329  | C | T | 21  | 10 | --     | --  |
|            | Ca(ICC2/PI489777)SNP_15101 | 357  | A | G | 19  | 9  | --     | --  |
|            | Ca(ICC2/PI489777)SNP_15102 | 563  | C | T | 22  | 8  | --     | --  |
| CakTC38722 | Ca(ICC2/PI489777)SNP_15103 | 916  | C | T | 19  | 11 | --     | --  |
|            | Ca(ICC2/PI489777)SNP_15104 | 1308 | A | G | 12  | 4  | --     | --  |
|            | Ca(ICC2/PI489777)SNP_15105 | 1353 | T | C | 10  | 4  | --     | --  |
|            | Ca(ICC2/PI489777)SNP_15106 | 1354 | T | G | 10  | 4  | --     | --  |
|            | Ca(ICC2/PI489777)SNP_15107 | 1396 | A | G | 9   | 3  | --     | --  |
| CakTC42286 | Ca(ICC2/PI489777)SNP_15108 | 189  | A | C | 3   | 4  | --     | --  |
|            | Ca(ICC2/PI489777)SNP_15109 | 421  | G | C | 4   | 7  | --     | --  |
|            | Ca(ICC2/PI489777)SNP_15110 | 493  | G | A | 3   | 5  | --     | --  |
|            | Ca(ICC2/PI489777)SNP_15111 | 532  | G | A | 3   | 5  | --     | --  |
| CakTC30830 | Ca(ICC2/PI489777)SNP_15112 | 1028 | G | A | 6   | 6  | Flower | bud |
| CakTC40365 | Ca(ICC2/PI489777)SNP_15113 | 133  | A | T | 3   | 3  | --     | --  |
|            | Ca(ICC2/PI489777)SNP_15114 | 420  | A | G | 9   | 21 | --     | --  |
|            | Ca(ICC2/PI489777)SNP_15115 | 707  | C | T | 11  | 14 | --     | --  |
| CakTC25418 | Ca(ICC2/PI489777)SNP_15116 | 1087 | G | A | 4   | 3  | --     | --  |
| CakTC34029 | Ca(ICC2/PI489777)SNP_15117 | 673  | C | T | 58  | 38 | --     | --  |
|            | Ca(ICC2/PI489777)SNP_15118 | 841  | C | A | 58  | 45 | --     | --  |
|            | Ca(ICC2/PI489777)SNP_15119 | 1069 | C | T | 48  | 41 | --     | --  |
|            | Ca(ICC2/PI489777)SNP_15120 | 1098 | A | G | 43  | 41 | --     | --  |
|            | Ca(ICC2/PI489777)SNP_15121 | 1357 | A | T | 39  | 22 | --     | --  |
| CakTC31406 | Ca(ICC2/PI489777)SNP_15122 | 16   | C | T | 11  | 3  | --     | --  |
|            | Ca(ICC2/PI489777)SNP_15123 | 50   | T | C | 16  | 3  | --     | --  |
| CakTC39312 | Ca(ICC2/PI489777)SNP_15124 | 370  | T | C | 28  | 12 | --     | --  |
|            | Ca(ICC2/PI489777)SNP_15125 | 409  | T | A | 34  | 13 | --     | --  |
|            | Ca(ICC2/PI489777)SNP_15126 | 784  | G | T | 24  | 11 | --     | --  |
|            | Ca(ICC2/PI489777)SNP_15127 | 796  | A | G | 22  | 7  | --     | --  |
| CakTC32420 | Ca(ICC2/PI489777)SNP_15128 | 65   | C | T | 5   | 3  | --     | --  |
| CakTC38835 | Ca(ICC2/PI489777)SNP_15129 | 187  | C | T | 3   | 7  | --     | --  |
|            | Ca(ICC2/PI489777)SNP_15130 | 849  | C | T | 16  | 12 | --     | --  |
|            | Ca(ICC2/PI489777)SNP_15131 | 977  | A | G | 9   | 6  | --     | --  |
|            | Ca(ICC2/PI489777)SNP_15132 | 1142 | G | A | 11  | 7  | --     | --  |
|            | Ca(ICC2/PI489777)SNP_15133 | 1242 | A | C | 10  | 7  | --     | --  |
|            | Ca(ICC2/PI489777)SNP_15134 | 1257 | A | T | 10  | 7  | --     | --  |
| CakTC26500 | Ca(ICC2/PI489777)SNP_15135 | 405  | G | A | 13  | 7  | --     | --  |
|            | Ca(ICC2/PI489777)SNP_15136 | 559  | T | C | 9   | 7  | --     | --  |
|            | Ca(ICC2/PI489777)SNP_15137 | 560  | T | A | 6   | 7  | --     | --  |
|            | Ca(ICC2/PI489777)SNP_15138 | 672  | C | T | 6   | 3  | --     | --  |
|            | Ca(ICC2/PI489777)SNP_15139 | 1597 | T | A | 7   | 3  | --     | --  |
| CakTC42530 | Ca(ICC2/PI489777)SNP_15140 | 298  | T | C | 12  | 4  | --     | --  |
| CakTC25831 | Ca(ICC2/PI489777)SNP_15141 | 713  | G | T | 82  | 6  | --     | --  |
|            | Ca(ICC2/PI489777)SNP_15142 | 714  | A | G | 83  | 6  | --     | --  |
|            | Ca(ICC2/PI489777)SNP_15143 | 741  | A | G | 84  | 6  | --     | --  |
|            | Ca(ICC2/PI489777)SNP_15144 | 751  | G | A | 97  | 7  | --     | --  |
|            | Ca(ICC2/PI489777)SNP_15145 | 786  | G | C | 122 | 9  | --     | --  |
|            | Ca(ICC2/PI489777)SNP_15146 | 798  | C | T | 123 | 11 | --     | --  |
|            | Ca(ICC2/PI489777)SNP_15147 | 799  | C | A | 123 | 11 | --     | --  |
|            | Ca(ICC2/PI489777)SNP_15148 | 823  | T | G | 107 | 14 | --     | --  |
|            | Ca(ICC2/PI489777)SNP_15149 | 870  | A | G | 153 | 19 | --     | --  |
|            | Ca(ICC2/PI489777)SNP_15150 | 1416 | T | C | 158 | 46 | --     | --  |
|            | Ca(ICC2/PI489777)SNP_15151 | 1686 | A | G | 158 | 50 | --     | --  |
|            | Ca(ICC2/PI489777)SNP_15152 | 1745 | A | G | 142 | 59 | --     | --  |
|            | Ca(ICC2/PI489777)SNP_15153 | 1767 | T | G | 142 | 58 | --     | --  |
|            | Ca(ICC2/PI489777)SNP_15154 | 2049 | T | C | 139 | 40 | --     | --  |
| CakTC14889 | Ca(ICC2/PI489777)SNP_15155 | 3384 | A | C | 4   | 3  | --     | --  |
|            | Ca(ICC2/PI489777)SNP_15156 | 3389 | G | A | 4   | 3  | --     | --  |
| CakTC23208 | Ca(ICC2/PI489777)SNP_15157 | 121  | A | G | 8   | 4  | --     | --  |
| CakTC28279 | Ca(ICC2/PI489777)SNP_15158 | 252  | C | T | 8   | 3  | Flower | bud |
|            | Ca(ICC2/PI489777)SNP_15159 | 296  | C | T | 7   | 3  | Flower | bud |
|            | Ca(ICC2/PI489777)SNP_15160 | 318  | A | G | 7   | 3  | Flower | bud |
| CakTC24644 | Ca(ICC2/PI489777)SNP_15161 | 770  | A | T | 5   | 10 | --     | --  |
| CakTC00660 | Ca(ICC2/PI489777)SNP_15162 | 135  | A | T | 4   | 4  | --     | --  |
|            | Ca(ICC2/PI489777)SNP_15163 | 186  | T | C | 7   | 5  | --     | --  |
|            | Ca(ICC2/PI489777)SNP_15164 | 187  | C | G | 7   | 5  | --     | --  |
| CakTC40598 | Ca(ICC2/PI489777)SNP_15165 | 329  | A | T | 13  | 6  | --     | --  |

|            |                            |      |   |   |     |    |        |     |
|------------|----------------------------|------|---|---|-----|----|--------|-----|
|            | Ca(ICC2/PI489777)SNP_15166 | 440  | C | A | 17  | 7  | --     | --  |
| CakTC25706 | Ca(ICC2/PI489777)SNP_15167 | 234  | G | A | 7   | 4  | --     | --  |
|            | Ca(ICC2/PI489777)SNP_15168 | 347  | T | A | 15  | 7  | --     | --  |
|            | Ca(ICC2/PI489777)SNP_15169 | 423  | A | G | 14  | 7  | --     | --  |
|            | Ca(ICC2/PI489777)SNP_15170 | 609  | A | G | 15  | 5  | --     | --  |
|            | Ca(ICC2/PI489777)SNP_15171 | 690  | C | G | 12  | 6  | --     | --  |
| CakTC28223 | Ca(ICC2/PI489777)SNP_15172 | 1082 | G | A | 6   | 4  | Flower | bud |
|            | Ca(ICC2/PI489777)SNP_15173 | 1119 | T | G | 5   | 4  | Flower | bud |
|            | Ca(ICC2/PI489777)SNP_15174 | 1147 | A | G | 7   | 4  | Flower | bud |
|            | Ca(ICC2/PI489777)SNP_15175 | 1150 | C | T | 7   | 4  | Flower | bud |
| CakTC43107 | Ca(ICC2/PI489777)SNP_15176 | 768  | T | G | 11  | 5  | --     | HB  |
| CakTC11680 | Ca(ICC2/PI489777)SNP_15177 | 1710 | T | C | 3   | 3  | --     | --  |
| CakTC26538 | Ca(ICC2/PI489777)SNP_15178 | 650  | A | G | 16  | 13 | --     | --  |
| CakTC32314 | Ca(ICC2/PI489777)SNP_15179 | 127  | T | C | 7   | 3  | --     | --  |
|            | Ca(ICC2/PI489777)SNP_15180 | 139  | A | G | 7   | 3  | --     | --  |
|            | Ca(ICC2/PI489777)SNP_15181 | 147  | T | A | 8   | 3  | --     | --  |
| CakTC26440 | Ca(ICC2/PI489777)SNP_15182 | 1385 | C | G | 168 | 23 | --     | --  |
|            | Ca(ICC2/PI489777)SNP_15183 | 1421 | C | T | 167 | 20 | --     | --  |
|            | Ca(ICC2/PI489777)SNP_15184 | 1460 | C | A | 154 | 17 | --     | --  |
|            | Ca(ICC2/PI489777)SNP_15185 | 1643 | C | T | 64  | 3  | --     | --  |
| CakTC24378 | Ca(ICC2/PI489777)SNP_15186 | 139  | C | A | 9   | 6  | --     | --  |
|            | Ca(ICC2/PI489777)SNP_15187 | 216  | C | T | 30  | 20 | --     | --  |
|            | Ca(ICC2/PI489777)SNP_15188 | 436  | G | C | 33  | 27 | --     | --  |
|            | Ca(ICC2/PI489777)SNP_15189 | 559  | A | G | 25  | 31 | --     | --  |
|            | Ca(ICC2/PI489777)SNP_15190 | 685  | C | A | 64  | 37 | --     | --  |
|            | Ca(ICC2/PI489777)SNP_15191 | 687  | C | T | 67  | 41 | --     | --  |
|            | Ca(ICC2/PI489777)SNP_15192 | 742  | A | G | 49  | 36 | --     | --  |
|            | Ca(ICC2/PI489777)SNP_15193 | 771  | T | A | 77  | 39 | --     | --  |
|            | Ca(ICC2/PI489777)SNP_15194 | 793  | C | T | 77  | 41 | --     | --  |
| CakTC26999 | Ca(ICC2/PI489777)SNP_15195 | 177  | A | T | 3   | 7  | --     | --  |
|            | Ca(ICC2/PI489777)SNP_15196 | 2686 | T | G | 4   | 3  | --     | --  |
|            | Ca(ICC2/PI489777)SNP_15197 | 2701 | A | G | 4   | 3  | --     | --  |
|            | Ca(ICC2/PI489777)SNP_15198 | 2980 | T | C | 4   | 4  | --     | --  |
| CakTC24300 | Ca(ICC2/PI489777)SNP_15199 | 258  | T | C | 21  | 3  | Flower | bud |
|            | Ca(ICC2/PI489777)SNP_15200 | 579  | T | G | 22  | 6  | Flower | bud |
|            | Ca(ICC2/PI489777)SNP_15201 | 759  | A | G | 17  | 5  | Flower | bud |
|            | Ca(ICC2/PI489777)SNP_15202 | 909  | T | C | 19  | 6  | Flower | bud |
|            | Ca(ICC2/PI489777)SNP_15203 | 1146 | T | C | 16  | 7  | Flower | bud |
| CakTC28875 | Ca(ICC2/PI489777)SNP_15204 | 232  | A | G | 3   | 4  | --     | --  |
|            | Ca(ICC2/PI489777)SNP_15205 | 1213 | T | A | 7   | 7  | --     | --  |
|            | Ca(ICC2/PI489777)SNP_15206 | 1285 | A | G | 5   | 6  | --     | --  |
| CakTC40757 | Ca(ICC2/PI489777)SNP_15207 | 502  | C | G | 38  | 16 | --     | --  |
| CakTC25136 | Ca(ICC2/PI489777)SNP_15208 | 379  | T | A | 18  | 18 | --     | --  |
|            | Ca(ICC2/PI489777)SNP_15209 | 492  | G | A | 18  | 21 | --     | --  |
|            | Ca(ICC2/PI489777)SNP_15210 | 580  | G | A | 27  | 23 | --     | --  |
|            | Ca(ICC2/PI489777)SNP_15211 | 615  | G | C | 29  | 22 | --     | --  |
|            | Ca(ICC2/PI489777)SNP_15212 | 664  | C | T | 30  | 24 | --     | --  |
|            | Ca(ICC2/PI489777)SNP_15213 | 673  | T | C | 31  | 26 | --     | --  |
|            | Ca(ICC2/PI489777)SNP_15214 | 1180 | C | T | 11  | 12 | --     | --  |
| CakTC13921 | Ca(ICC2/PI489777)SNP_15215 | 987  | A | G | 71  | 48 | --     | --  |
|            | Ca(ICC2/PI489777)SNP_15216 | 1062 | T | C | 68  | 39 | --     | --  |
| CakTC34559 | Ca(ICC2/PI489777)SNP_15217 | 109  | G | A | 4   | 3  | --     | --  |
|            | Ca(ICC2/PI489777)SNP_15218 | 111  | G | A | 4   | 3  | --     | --  |
|            | Ca(ICC2/PI489777)SNP_15219 | 121  | C | A | 4   | 3  | --     | --  |
|            | Ca(ICC2/PI489777)SNP_15220 | 157  | A | G | 4   | 3  | --     | --  |
| CakTC29090 | Ca(ICC2/PI489777)SNP_15221 | 748  | A | T | 3   | 12 | --     | --  |
| CakTC34020 | Ca(ICC2/PI489777)SNP_15222 | 179  | A | G | 5   | 10 | --     | --  |
|            | Ca(ICC2/PI489777)SNP_15223 | 1901 | G | C | 74  | 65 | --     | --  |
|            | Ca(ICC2/PI489777)SNP_15224 | 1930 | G | C | 76  | 66 | --     | --  |
|            | Ca(ICC2/PI489777)SNP_15225 | 2060 | A | G | 60  | 55 | --     | --  |
| CakTC36978 | Ca(ICC2/PI489777)SNP_15226 | 133  | T | C | 3   | 5  | --     | --  |
| CakTC38300 | Ca(ICC2/PI489777)SNP_15227 | 665  | T | C | 12  | 7  | --     | --  |
|            | Ca(ICC2/PI489777)SNP_15228 | 923  | T | C | 24  | 17 | --     | --  |
| CakTC30560 | Ca(ICC2/PI489777)SNP_15229 | 191  | A | G | 4   | 4  | Flower | bud |
|            | Ca(ICC2/PI489777)SNP_15230 | 245  | C | T | 5   | 4  | Flower | bud |
|            | Ca(ICC2/PI489777)SNP_15231 | 340  | T | A | 4   | 4  | Flower | bud |
|            | Ca(ICC2/PI489777)SNP_15232 | 416  | T | G | 4   | 3  | Flower | bud |
| CakTC41440 | Ca(ICC2/PI489777)SNP_15233 | 214  | T | C | 4   | 3  | --     | --  |
|            | Ca(ICC2/PI489777)SNP_15234 | 751  | A | G | 17  | 8  | --     | --  |
|            | Ca(ICC2/PI489777)SNP_15235 | 1201 | G | A | 10  | 7  | --     | --  |
|            | Ca(ICC2/PI489777)SNP_15236 | 1287 | C | T | 9   | 3  | --     | --  |
| CakTC37317 | Ca(ICC2/PI489777)SNP_15237 | 1014 | G | T | 15  | 5  | --     | --  |
| CakTC26361 | Ca(ICC2/PI489777)SNP_15238 | 181  | T | C | 3   | 3  | --     | --  |
| CakTC29933 | Ca(ICC2/PI489777)SNP_15239 | 703  | T | G | 3   | 4  | --     | --  |

|            |                            |      |   |   |    |    |    |       |
|------------|----------------------------|------|---|---|----|----|----|-------|
|            | Ca(ICC2/PI489777)SNP_15240 | 715  | C | T | 3  | 4  | -- | --    |
|            | Ca(ICC2/PI489777)SNP_15241 | 1018 | T | C | 4  | 6  | -- | --    |
| CakTC05202 | Ca(ICC2/PI489777)SNP_15242 | 115  | T | C | 8  | 5  | -- | MYB   |
|            | Ca(ICC2/PI489777)SNP_15243 | 204  | G | A | 9  | 12 | -- | MYB   |
|            | Ca(ICC2/PI489777)SNP_15244 | 288  | G | A | 12 | 12 | -- | MYB   |
|            | Ca(ICC2/PI489777)SNP_15245 | 714  | A | G | 8  | 6  | -- | MYB   |
|            | Ca(ICC2/PI489777)SNP_15246 | 1458 | A | G | 7  | 3  | -- | MYB   |
| CakTC11846 | Ca(ICC2/PI489777)SNP_15247 | 99   | T | G | 3  | 3  | -- | --    |
|            | Ca(ICC2/PI489777)SNP_15248 | 178  | A | G | 3  | 3  | -- | --    |
| CakTC32994 | Ca(ICC2/PI489777)SNP_15249 | 740  | G | A | 10 | 9  | -- | --    |
|            | Ca(ICC2/PI489777)SNP_15250 | 1862 | C | T | 14 | 3  | -- | --    |
| CakTC42127 | Ca(ICC2/PI489777)SNP_15251 | 82   | C | T | 8  | 13 | -- | --    |
|            | Ca(ICC2/PI489777)SNP_15252 | 218  | G | C | 12 | 22 | -- | --    |
|            | Ca(ICC2/PI489777)SNP_15253 | 842  | C | T | 12 | 23 | -- | --    |
| CakTC26227 | Ca(ICC2/PI489777)SNP_15254 | 759  | G | A | 6  | 6  | -- | --    |
|            | Ca(ICC2/PI489777)SNP_15255 | 1062 | G | A | 7  | 4  | -- | --    |
| CakTC28368 | Ca(ICC2/PI489777)SNP_15256 | 841  | A | C | 7  | 4  | -- | --    |
|            | Ca(ICC2/PI489777)SNP_15257 | 1639 | G | A | 6  | 3  | -- | --    |
|            | Ca(ICC2/PI489777)SNP_15258 | 1817 | T | G | 9  | 4  | -- | --    |
|            | Ca(ICC2/PI489777)SNP_15259 | 2304 | C | T | 4  | 3  | -- | --    |
|            | Ca(ICC2/PI489777)SNP_15260 | 2694 | G | A | 5  | 3  | -- | --    |
| CakTC34540 | Ca(ICC2/PI489777)SNP_15261 | 480  | G | A | 22 | 7  | -- | --    |
|            | Ca(ICC2/PI489777)SNP_15262 | 659  | C | T | 30 | 24 | -- | --    |
|            | Ca(ICC2/PI489777)SNP_15263 | 1079 | G | A | 82 | 27 | -- | --    |
|            | Ca(ICC2/PI489777)SNP_15264 | 1271 | G | C | 61 | 29 | -- | --    |
| CakTC36596 | Ca(ICC2/PI489777)SNP_15265 | 823  | C | A | 13 | 5  | -- | --    |
| CakTC36992 | Ca(ICC2/PI489777)SNP_15266 | 114  | T | C | 7  | 7  | -- | --    |
|            | Ca(ICC2/PI489777)SNP_15267 | 1428 | G | T | 9  | 5  | -- | --    |
| CakTC26171 | Ca(ICC2/PI489777)SNP_15268 | 595  | T | C | 3  | 4  | -- | --    |
|            | Ca(ICC2/PI489777)SNP_15269 | 979  | C | T | 5  | 4  | -- | --    |
|            | Ca(ICC2/PI489777)SNP_15270 | 1606 | C | T | 5  | 5  | -- | --    |
|            | Ca(ICC2/PI489777)SNP_15271 | 1655 | G | T | 3  | 3  | -- | --    |
| CakTC33846 | Ca(ICC2/PI489777)SNP_15272 | 19   | G | A | 6  | 4  | -- | --    |
|            | Ca(ICC2/PI489777)SNP_15273 | 1220 | T | C | 18 | 4  | -- | --    |
|            | Ca(ICC2/PI489777)SNP_15274 | 2082 | G | T | 14 | 5  | -- | --    |
| CakTC33471 | Ca(ICC2/PI489777)SNP_15275 | 162  | G | A | 13 | 12 | -- | --    |
|            | Ca(ICC2/PI489777)SNP_15276 | 334  | T | C | 17 | 11 | -- | --    |
|            | Ca(ICC2/PI489777)SNP_15277 | 731  | A | G | 22 | 6  | -- | --    |
|            | Ca(ICC2/PI489777)SNP_15278 | 769  | G | A | 12 | 7  | -- | --    |
|            | Ca(ICC2/PI489777)SNP_15279 | 858  | G | A | 11 | 5  | -- | --    |
| CakTC37322 | Ca(ICC2/PI489777)SNP_15280 | 343  | G | A | 17 | 20 | -- | SAP   |
|            | Ca(ICC2/PI489777)SNP_15281 | 421  | A | G | 21 | 19 | -- | SAP   |
|            | Ca(ICC2/PI489777)SNP_15282 | 565  | A | C | 15 | 10 | -- | SAP   |
| CakTC37941 | Ca(ICC2/PI489777)SNP_15283 | 251  | C | T | 5  | 10 | -- | --    |
|            | Ca(ICC2/PI489777)SNP_15284 | 265  | A | T | 6  | 10 | -- | --    |
|            | Ca(ICC2/PI489777)SNP_15285 | 857  | G | A | 14 | 3  | -- | --    |
|            | Ca(ICC2/PI489777)SNP_15286 | 1305 | C | G | 10 | 6  | -- | --    |
|            | Ca(ICC2/PI489777)SNP_15287 | 1321 | A | G | 10 | 6  | -- | --    |
|            | Ca(ICC2/PI489777)SNP_15288 | 1532 | C | T | 6  | 5  | -- | --    |
| CakTC35349 | Ca(ICC2/PI489777)SNP_15289 | 330  | G | A | 4  | 4  | -- | CAMTA |
|            | Ca(ICC2/PI489777)SNP_15290 | 464  | G | A | 5  | 4  | -- | CAMTA |
|            | Ca(ICC2/PI489777)SNP_15291 | 806  | G | T | 7  | 7  | -- | CAMTA |
|            | Ca(ICC2/PI489777)SNP_15292 | 1150 | A | T | 7  | 5  | -- | CAMTA |
|            | Ca(ICC2/PI489777)SNP_15293 | 1664 | G | A | 9  | 3  | -- | CAMTA |
|            | Ca(ICC2/PI489777)SNP_15294 | 2525 | G | T | 17 | 4  | -- | CAMTA |
| CakTC30909 | Ca(ICC2/PI489777)SNP_15295 | 740  | G | C | 3  | 7  | -- | --    |
|            | Ca(ICC2/PI489777)SNP_15296 | 770  | C | T | 3  | 9  | -- | --    |
|            | Ca(ICC2/PI489777)SNP_15297 | 881  | C | T | 3  | 13 | -- | --    |
|            | Ca(ICC2/PI489777)SNP_15298 | 1066 | A | G | 3  | 8  | -- | --    |
|            | Ca(ICC2/PI489777)SNP_15299 | 1092 | G | A | 3  | 7  | -- | --    |
|            | Ca(ICC2/PI489777)SNP_15300 | 1475 | C | T | 6  | 13 | -- | --    |
|            | Ca(ICC2/PI489777)SNP_15301 | 1748 | T | C | 8  | 11 | -- | --    |
|            | Ca(ICC2/PI489777)SNP_15302 | 1997 | A | G | 4  | 3  | -- | --    |
| CakTC40313 | Ca(ICC2/PI489777)SNP_15303 | 720  | T | C | 33 | 19 | -- | --    |
|            | Ca(ICC2/PI489777)SNP_15304 | 777  | A | G | 26 | 12 | -- | --    |
|            | Ca(ICC2/PI489777)SNP_15305 | 840  | A | G | 22 | 14 | -- | --    |
| CakTC35277 | Ca(ICC2/PI489777)SNP_15306 | 269  | A | G | 13 | 11 | -- | --    |
|            | Ca(ICC2/PI489777)SNP_15307 | 718  | A | G | 40 | 24 | -- | --    |
|            | Ca(ICC2/PI489777)SNP_15308 | 1930 | G | A | 21 | 18 | -- | --    |
|            | Ca(ICC2/PI489777)SNP_15309 | 2983 | G | A | 18 | 15 | -- | --    |
| CakTC35432 | Ca(ICC2/PI489777)SNP_15310 | 23   | T | A | 6  | 3  | -- | --    |
| CakTC17690 | Ca(ICC2/PI489777)SNP_15311 | 895  | C | T | 47 | 11 | -- | --    |
|            | Ca(ICC2/PI489777)SNP_15312 | 922  | T | C | 45 | 10 | -- | --    |
|            | Ca(ICC2/PI489777)SNP_15313 | 1135 | G | A | 41 | 4  | -- | --    |

|            |                            |      |   |   |     |     |    |     |
|------------|----------------------------|------|---|---|-----|-----|----|-----|
|            | Ca(ICC2/PI489777)SNP_15314 | 1210 | G | C | 37  | 6   | -- | --  |
|            | Ca(ICC2/PI489777)SNP_15315 | 1430 | G | A | 24  | 4   | -- | --  |
| CakTC10196 | Ca(ICC2/PI489777)SNP_15316 | 105  | C | T | 20  | 5   | -- | --  |
|            | Ca(ICC2/PI489777)SNP_15317 | 700  | A | G | 28  | 10  | -- | --  |
|            | Ca(ICC2/PI489777)SNP_15318 | 1132 | G | A | 32  | 8   | -- | --  |
|            | Ca(ICC2/PI489777)SNP_15319 | 1999 | A | G | 45  | 20  | -- | --  |
| CakTC39485 | Ca(ICC2/PI489777)SNP_15320 | 551  | T | A | 24  | 17  | -- | --  |
| CakTC27627 | Ca(ICC2/PI489777)SNP_15321 | 1977 | G | A | 4   | 4   | -- | --  |
| CakTC12588 | Ca(ICC2/PI489777)SNP_15322 | 634  | C | T | 3   | 3   | -- | --  |
| CakTC28617 | Ca(ICC2/PI489777)SNP_15323 | 196  | A | T | 8   | 11  | -- | --  |
|            | Ca(ICC2/PI489777)SNP_15324 | 329  | T | C | 10  | 9   | -- | --  |
|            | Ca(ICC2/PI489777)SNP_15325 | 331  | T | C | 10  | 9   | -- | --  |
|            | Ca(ICC2/PI489777)SNP_15326 | 367  | C | G | 11  | 8   | -- | --  |
|            | Ca(ICC2/PI489777)SNP_15327 | 368  | G | A | 10  | 8   | -- | --  |
| CakTC27755 | Ca(ICC2/PI489777)SNP_15328 | 670  | G | C | 7   | 3   | -- | --  |
|            | Ca(ICC2/PI489777)SNP_15329 | 1502 | C | T | 6   | 5   | -- | --  |
| CakTC38079 | Ca(ICC2/PI489777)SNP_15330 | 288  | G | A | 36  | 35  | -- | --  |
|            | Ca(ICC2/PI489777)SNP_15331 | 441  | A | G | 37  | 41  | -- | --  |
|            | Ca(ICC2/PI489777)SNP_15332 | 771  | G | A | 28  | 33  | -- | --  |
| CakTC32179 | Ca(ICC2/PI489777)SNP_15333 | 474  | A | G | 16  | 12  | -- | --  |
|            | Ca(ICC2/PI489777)SNP_15334 | 655  | C | G | 26  | 15  | -- | --  |
|            | Ca(ICC2/PI489777)SNP_15335 | 859  | A | G | 26  | 16  | -- | --  |
| CakTC38883 | Ca(ICC2/PI489777)SNP_15336 | 86   | T | A | 19  | 3   | -- | --  |
|            | Ca(ICC2/PI489777)SNP_15337 | 88   | T | A | 19  | 3   | -- | --  |
|            | Ca(ICC2/PI489777)SNP_15338 | 105  | T | C | 21  | 3   | -- | --  |
|            | Ca(ICC2/PI489777)SNP_15339 | 239  | G | A | 31  | 7   | -- | --  |
|            | Ca(ICC2/PI489777)SNP_15340 | 247  | T | C | 33  | 7   | -- | --  |
|            | Ca(ICC2/PI489777)SNP_15341 | 274  | T | G | 28  | 7   | -- | --  |
|            | Ca(ICC2/PI489777)SNP_15342 | 290  | A | G | 39  | 7   | -- | --  |
|            | Ca(ICC2/PI489777)SNP_15343 | 323  | A | G | 34  | 7   | -- | --  |
|            | Ca(ICC2/PI489777)SNP_15344 | 374  | A | G | 33  | 9   | -- | --  |
|            | Ca(ICC2/PI489777)SNP_15345 | 452  | A | G | 30  | 9   | -- | --  |
|            | Ca(ICC2/PI489777)SNP_15346 | 464  | G | A | 38  | 7   | -- | --  |
| CakTC23790 | Ca(ICC2/PI489777)SNP_15347 | 260  | T | A | 207 | 242 | -- | --  |
| CakTC34294 | Ca(ICC2/PI489777)SNP_15348 | 1649 | C | G | 11  | 8   | -- | --  |
|            | Ca(ICC2/PI489777)SNP_15349 | 1701 | A | G | 13  | 9   | -- | --  |
|            | Ca(ICC2/PI489777)SNP_15350 | 2088 | T | C | 4   | 6   | -- | --  |
| CakTC42255 | Ca(ICC2/PI489777)SNP_15351 | 513  | G | T | 9   | 7   | -- | --  |
|            | Ca(ICC2/PI489777)SNP_15352 | 786  | T | C | 12  | 14  | -- | --  |
|            | Ca(ICC2/PI489777)SNP_15353 | 996  | G | A | 13  | 7   | -- | --  |
| CakTC27899 | Ca(ICC2/PI489777)SNP_15354 | 1159 | T | C | 16  | 6   | -- | --  |
|            | Ca(ICC2/PI489777)SNP_15355 | 2257 | C | T | 5   | 4   | -- | --  |
| CakTC27987 | Ca(ICC2/PI489777)SNP_15356 | 1716 | C | T | 31  | 31  | -- | --  |
|            | Ca(ICC2/PI489777)SNP_15357 | 1749 | A | G | 34  | 35  | -- | --  |
|            | Ca(ICC2/PI489777)SNP_15358 | 2175 | T | C | 22  | 21  | -- | --  |
|            | Ca(ICC2/PI489777)SNP_15359 | 2396 | G | C | 15  | 6   | -- | --  |
|            | Ca(ICC2/PI489777)SNP_15360 | 2450 | G | A | 21  | 7   | -- | --  |
|            | Ca(ICC2/PI489777)SNP_15361 | 2470 | A | C | 20  | 7   | -- | --  |
| CakTC23692 | Ca(ICC2/PI489777)SNP_15362 | 478  | G | C | 4   | 5   | -- | SBP |
|            | Ca(ICC2/PI489777)SNP_15363 | 1373 | T | C | 9   | 3   | -- | SBP |
| CakTC37257 | Ca(ICC2/PI489777)SNP_15364 | 317  | G | A | 5   | 5   | -- | --  |
|            | Ca(ICC2/PI489777)SNP_15365 | 414  | C | T | 4   | 5   | -- | --  |
|            | Ca(ICC2/PI489777)SNP_15366 | 960  | T | C | 10  | 4   | -- | --  |
| CakTC27446 | Ca(ICC2/PI489777)SNP_15367 | 419  | A | G | 24  | 10  | -- | --  |
|            | Ca(ICC2/PI489777)SNP_15368 | 657  | G | C | 19  | 5   | -- | --  |
| CakTC20171 | Ca(ICC2/PI489777)SNP_15369 | 265  | C | T | 6   | 3   | -- | --  |
|            | Ca(ICC2/PI489777)SNP_15370 | 271  | C | T | 6   | 3   | -- | --  |
|            | Ca(ICC2/PI489777)SNP_15371 | 1347 | C | A | 5   | 11  | -- | --  |
| CakTC26765 | Ca(ICC2/PI489777)SNP_15372 | 229  | C | T | 55  | 9   | -- | --  |
|            | Ca(ICC2/PI489777)SNP_15373 | 607  | C | T | 85  | 17  | -- | --  |
|            | Ca(ICC2/PI489777)SNP_15374 | 650  | T | C | 76  | 20  | -- | --  |
|            | Ca(ICC2/PI489777)SNP_15375 | 961  | T | G | 46  | 16  | -- | --  |
|            | Ca(ICC2/PI489777)SNP_15376 | 1015 | G | C | 28  | 13  | -- | --  |
| CakTC09569 | Ca(ICC2/PI489777)SNP_15377 | 593  | G | A | 204 | 150 | -- | --  |
| CakTC31960 | Ca(ICC2/PI489777)SNP_15378 | 670  | A | G | 3   | 6   | -- | --  |
|            | Ca(ICC2/PI489777)SNP_15379 | 682  | T | C | 3   | 6   | -- | --  |
| CakTC32549 | Ca(ICC2/PI489777)SNP_15380 | 402  | G | C | 11  | 7   | -- | --  |
| CakTC39465 | Ca(ICC2/PI489777)SNP_15381 | 906  | T | A | 14  | 22  | -- | --  |
|            | Ca(ICC2/PI489777)SNP_15382 | 1234 | T | A | 10  | 21  | -- | --  |
| CakTC42851 | Ca(ICC2/PI489777)SNP_15383 | 494  | A | T | 25  | 19  | -- | --  |
|            | Ca(ICC2/PI489777)SNP_15384 | 1184 | C | T | 35  | 34  | -- | --  |
|            | Ca(ICC2/PI489777)SNP_15385 | 1301 | G | A | 43  | 16  | -- | --  |
|            | Ca(ICC2/PI489777)SNP_15386 | 1395 | G | T | 28  | 12  | -- | --  |
|            | Ca(ICC2/PI489777)SNP_15387 | 1556 | C | T | 25  | 10  | -- | --  |



|            |                            |      |   |   |    |    |    |      |
|------------|----------------------------|------|---|---|----|----|----|------|
|            | Ca(ICC2/PI489777)SNP_15388 | 1604 | A | C | 13 | 10 | -- | --   |
| CakTC39517 | Ca(ICC2/PI489777)SNP_15389 | 807  | G | T | 7  | 11 | -- | FHA  |
|            | Ca(ICC2/PI489777)SNP_15390 | 837  | A | G | 7  | 11 | -- | FHA  |
|            | Ca(ICC2/PI489777)SNP_15391 | 1005 | G | C | 8  | 4  | -- | FHA  |
| CakTC07497 | Ca(ICC2/PI489777)SNP_15392 | 375  | T | G | 11 | 4  | -- | --   |
| CakTC40388 | Ca(ICC2/PI489777)SNP_15393 | 276  | A | G | 5  | 3  | -- | --   |
|            | Ca(ICC2/PI489777)SNP_15394 | 351  | A | T | 6  | 4  | -- | --   |
|            | Ca(ICC2/PI489777)SNP_15395 | 452  | A | T | 7  | 4  | -- | --   |
|            | Ca(ICC2/PI489777)SNP_15396 | 476  | A | G | 8  | 3  | -- | --   |
|            | Ca(ICC2/PI489777)SNP_15397 | 631  | G | C | 7  | 3  | -- | --   |
| CakTC13852 | Ca(ICC2/PI489777)SNP_15398 | 164  | T | A | 4  | 7  | -- | --   |
|            | Ca(ICC2/PI489777)SNP_15399 | 245  | T | C | 8  | 7  | -- | --   |
| CakTC32710 | Ca(ICC2/PI489777)SNP_15400 | 1331 | A | G | 17 | 11 | -- | ARID |
|            | Ca(ICC2/PI489777)SNP_15401 | 1427 | A | G | 14 | 10 | -- | ARID |
| CakTC35890 | Ca(ICC2/PI489777)SNP_15402 | 434  | A | G | 25 | 21 | -- | --   |
|            | Ca(ICC2/PI489777)SNP_15403 | 1953 | G | A | 37 | 25 | -- | --   |
|            | Ca(ICC2/PI489777)SNP_15404 | 2204 | A | G | 37 | 47 | -- | --   |
|            | Ca(ICC2/PI489777)SNP_15405 | 2215 | G | T | 38 | 41 | -- | --   |
|            | Ca(ICC2/PI489777)SNP_15406 | 2290 | A | G | 38 | 42 | -- | --   |
| CakTC11959 | Ca(ICC2/PI489777)SNP_15407 | 155  | T | C | 4  | 8  | -- | --   |
|            | Ca(ICC2/PI489777)SNP_15408 | 184  | C | A | 4  | 9  | -- | --   |
| CakTC01568 | Ca(ICC2/PI489777)SNP_15409 | 187  | G | T | 4  | 3  | -- | --   |
|            | Ca(ICC2/PI489777)SNP_15410 | 457  | C | T | 4  | 3  | -- | --   |
| CakTC38748 | Ca(ICC2/PI489777)SNP_15411 | 688  | G | A | 9  | 4  | -- | FAR1 |
|            | Ca(ICC2/PI489777)SNP_15412 | 925  | C | T | 16 | 6  | -- | FAR1 |
| CakTC25505 | Ca(ICC2/PI489777)SNP_15413 | 141  | A | T | 6  | 5  | -- | --   |
|            | Ca(ICC2/PI489777)SNP_15414 | 1695 | T | C | 33 | 29 | -- | --   |
|            | Ca(ICC2/PI489777)SNP_15415 | 1870 | G | T | 21 | 21 | -- | --   |
| CakTC36089 | Ca(ICC2/PI489777)SNP_15416 | 214  | A | G | 19 | 10 | -- | --   |
|            | Ca(ICC2/PI489777)SNP_15417 | 283  | C | A | 24 | 16 | -- | --   |
|            | Ca(ICC2/PI489777)SNP_15418 | 748  | G | A | 23 | 12 | -- | --   |
|            | Ca(ICC2/PI489777)SNP_15419 | 890  | C | T | 21 | 13 | -- | --   |
|            | Ca(ICC2/PI489777)SNP_15420 | 1090 | T | C | 27 | 13 | -- | --   |
|            | Ca(ICC2/PI489777)SNP_15421 | 1392 | C | T | 20 | 14 | -- | --   |
|            | Ca(ICC2/PI489777)SNP_15422 | 1420 | C | A | 17 | 17 | -- | --   |
|            | Ca(ICC2/PI489777)SNP_15423 | 1531 | A | G | 14 | 9  | -- | --   |
|            | Ca(ICC2/PI489777)SNP_15424 | 1621 | T | C | 20 | 11 | -- | --   |
|            | Ca(ICC2/PI489777)SNP_15425 | 1831 | G | A | 24 | 12 | -- | --   |
|            | Ca(ICC2/PI489777)SNP_15426 | 2549 | T | G | 4  | 3  | -- | --   |
|            | Ca(ICC2/PI489777)SNP_15427 | 2561 | A | G | 5  | 3  | -- | --   |
|            | Ca(ICC2/PI489777)SNP_15428 | 2564 | A | G | 5  | 3  | -- | --   |
| CakTC42804 | Ca(ICC2/PI489777)SNP_15429 | 1425 | C | T | 32 | 20 | -- | --   |
| CakTC31793 | Ca(ICC2/PI489777)SNP_15430 | 563  | T | G | 4  | 4  | -- | --   |
|            | Ca(ICC2/PI489777)SNP_15431 | 662  | G | A | 4  | 9  | -- | --   |
| CakTC31131 | Ca(ICC2/PI489777)SNP_15432 | 421  | T | C | 44 | 30 | -- | --   |
|            | Ca(ICC2/PI489777)SNP_15433 | 439  | C | T | 37 | 33 | -- | --   |
| CakTC32447 | Ca(ICC2/PI489777)SNP_15434 | 511  | A | T | 8  | 18 | -- | --   |
| CakTC37608 | Ca(ICC2/PI489777)SNP_15435 | 166  | C | T | 8  | 6  | -- | --   |
|            | Ca(ICC2/PI489777)SNP_15436 | 254  | C | T | 13 | 8  | -- | --   |
|            | Ca(ICC2/PI489777)SNP_15437 | 473  | A | T | 27 | 16 | -- | --   |
|            | Ca(ICC2/PI489777)SNP_15438 | 674  | G | C | 15 | 18 | -- | --   |
|            | Ca(ICC2/PI489777)SNP_15439 | 854  | A | T | 11 | 15 | -- | --   |
|            | Ca(ICC2/PI489777)SNP_15440 | 860  | G | A | 10 | 21 | -- | --   |
|            | Ca(ICC2/PI489777)SNP_15441 | 883  | T | C | 10 | 23 | -- | --   |
|            | Ca(ICC2/PI489777)SNP_15442 | 993  | G | C | 13 | 13 | -- | --   |
|            | Ca(ICC2/PI489777)SNP_15443 | 1004 | A | C | 13 | 11 | -- | --   |
|            | Ca(ICC2/PI489777)SNP_15444 | 1089 | T | G | 21 | 13 | -- | --   |
|            | Ca(ICC2/PI489777)SNP_15445 | 1230 | C | A | 41 | 16 | -- | --   |
|            | Ca(ICC2/PI489777)SNP_15446 | 1232 | A | G | 38 | 16 | -- | --   |
| CakTC37512 | Ca(ICC2/PI489777)SNP_15447 | 131  | C | G | 8  | 11 | -- | --   |
|            | Ca(ICC2/PI489777)SNP_15448 | 268  | G | A | 12 | 12 | -- | --   |
|            | Ca(ICC2/PI489777)SNP_15449 | 572  | T | C | 17 | 6  | -- | --   |
|            | Ca(ICC2/PI489777)SNP_15450 | 676  | C | T | 14 | 5  | -- | --   |
|            | Ca(ICC2/PI489777)SNP_15451 | 797  | A | G | 11 | 8  | -- | --   |
|            | Ca(ICC2/PI489777)SNP_15452 | 1132 | T | C | 21 | 13 | -- | --   |
|            | Ca(ICC2/PI489777)SNP_15453 | 1267 | G | A | 13 | 9  | -- | --   |
| CakTC29284 | Ca(ICC2/PI489777)SNP_15454 | 746  | G | A | 3  | 7  | -- | --   |
|            | Ca(ICC2/PI489777)SNP_15455 | 947  | C | T | 7  | 4  | -- | --   |
|            | Ca(ICC2/PI489777)SNP_15456 | 2063 | A | T | 5  | 3  | -- | --   |
|            | Ca(ICC2/PI489777)SNP_15457 | 2480 | G | C | 6  | 6  | -- | --   |
| CakTC34125 | Ca(ICC2/PI489777)SNP_15458 | 1380 | G | A | 9  | 10 | -- | --   |
|            | Ca(ICC2/PI489777)SNP_15459 | 1553 | T | C | 9  | 8  | -- | --   |
| CakTC33134 | Ca(ICC2/PI489777)SNP_15460 | 809  | A | G | 12 | 10 | -- | --   |
|            | Ca(ICC2/PI489777)SNP_15461 | 1473 | A | G | 10 | 5  | -- | --   |

|            |                            |      |   |   |    |     |        |     |
|------------|----------------------------|------|---|---|----|-----|--------|-----|
|            | Ca(ICC2/PI489777)SNP_15462 | 1592 | C | T | 9  | 4   | --     | --  |
| CakTC24898 | Ca(ICC2/PI489777)SNP_15463 | 321  | T | C | 29 | 5   | --     | --  |
|            | Ca(ICC2/PI489777)SNP_15464 | 342  | A | T | 28 | 4   | --     | --  |
|            | Ca(ICC2/PI489777)SNP_15465 | 343  | A | G | 28 | 4   | --     | --  |
|            | Ca(ICC2/PI489777)SNP_15466 | 380  | A | G | 27 | 4   | --     | --  |
|            | Ca(ICC2/PI489777)SNP_15467 | 383  | A | G | 25 | 4   | --     | --  |
| CakTC30741 | Ca(ICC2/PI489777)SNP_15468 | 1330 | C | A | 3  | 3   | --     | --  |
| CakTC33408 | Ca(ICC2/PI489777)SNP_15469 | 98   | C | G | 63 | 63  | --     | --  |
|            | Ca(ICC2/PI489777)SNP_15470 | 275  | T | C | 99 | 63  | --     | --  |
|            | Ca(ICC2/PI489777)SNP_15471 | 812  | A | G | 59 | 119 | --     | --  |
|            | Ca(ICC2/PI489777)SNP_15472 | 819  | A | C | 64 | 112 | --     | --  |
|            | Ca(ICC2/PI489777)SNP_15473 | 824  | T | A | 66 | 94  | --     | --  |
|            | Ca(ICC2/PI489777)SNP_15474 | 831  | G | A | 66 | 95  | --     | --  |
|            | Ca(ICC2/PI489777)SNP_15475 | 867  | A | G | 56 | 122 | --     | --  |
|            | Ca(ICC2/PI489777)SNP_15476 | 970  | A | G | 81 | 136 | --     | --  |
|            | Ca(ICC2/PI489777)SNP_15477 | 1034 | A | G | 92 | 121 | --     | --  |
|            | Ca(ICC2/PI489777)SNP_15478 | 1055 | A | G | 82 | 116 | --     | --  |
|            | Ca(ICC2/PI489777)SNP_15479 | 1088 | A | G | 78 | 102 | --     | --  |
|            | Ca(ICC2/PI489777)SNP_15480 | 1580 | C | T | 33 | 63  | --     | --  |
|            | Ca(ICC2/PI489777)SNP_15481 | 1665 | A | T | 32 | 41  | --     | --  |
|            | Ca(ICC2/PI489777)SNP_15482 | 1708 | C | A | 29 | 43  | --     | --  |
|            | Ca(ICC2/PI489777)SNP_15483 | 1762 | T | A | 19 | 38  | --     | --  |
| CakTC27912 | Ca(ICC2/PI489777)SNP_15484 | 418  | T | C | 40 | 18  | --     | --  |
| CakTC26241 | Ca(ICC2/PI489777)SNP_15485 | 287  | G | T | 3  | 7   | --     | --  |
|            | Ca(ICC2/PI489777)SNP_15486 | 419  | G | A | 4  | 5   | --     | --  |
| CakTC38937 | Ca(ICC2/PI489777)SNP_15487 | 919  | T | C | 8  | 3   | --     | --  |
|            | Ca(ICC2/PI489777)SNP_15488 | 1365 | C | G | 14 | 6   | --     | --  |
| CakTC03117 | Ca(ICC2/PI489777)SNP_15489 | 92   | G | C | 5  | 3   | --     | --  |
|            | Ca(ICC2/PI489777)SNP_15490 | 164  | C | A | 4  | 4   | --     | --  |
|            | Ca(ICC2/PI489777)SNP_15491 | 165  | G | C | 4  | 4   | --     | --  |
| CakTC36718 | Ca(ICC2/PI489777)SNP_15492 | 532  | T | C | 7  | 9   | --     | --  |
|            | Ca(ICC2/PI489777)SNP_15493 | 2299 | A | G | 8  | 13  | --     | --  |
| CakTC38677 | Ca(ICC2/PI489777)SNP_15494 | 684  | T | G | 68 | 52  | --     | --  |
| CakTC25088 | Ca(ICC2/PI489777)SNP_15495 | 301  | G | A | 57 | 11  | --     | --  |
|            | Ca(ICC2/PI489777)SNP_15496 | 511  | C | T | 86 | 23  | --     | --  |
|            | Ca(ICC2/PI489777)SNP_15497 | 794  | C | G | 53 | 10  | --     | --  |
|            | Ca(ICC2/PI489777)SNP_15498 | 1124 | C | G | 59 | 13  | --     | --  |
|            | Ca(ICC2/PI489777)SNP_15499 | 1317 | C | T | 42 | 10  | --     | --  |
| CakTC30948 | Ca(ICC2/PI489777)SNP_15500 | 104  | T | G | 26 | 7   | --     | --  |
|            | Ca(ICC2/PI489777)SNP_15501 | 555  | T | G | 7  | 9   | --     | --  |
|            | Ca(ICC2/PI489777)SNP_15502 | 587  | G | A | 7  | 7   | --     | --  |
|            | Ca(ICC2/PI489777)SNP_15503 | 684  | G | C | 5  | 5   | --     | --  |
| CakTC36756 | Ca(ICC2/PI489777)SNP_15504 | 1351 | G | A | 7  | 4   | --     | --  |
|            | Ca(ICC2/PI489777)SNP_15505 | 1369 | T | C | 10 | 4   | --     | --  |
|            | Ca(ICC2/PI489777)SNP_15506 | 1876 | A | T | 23 | 4   | --     | --  |
| CakTC39836 | Ca(ICC2/PI489777)SNP_15507 | 1205 | G | C | 44 | 15  | --     | --  |
| CakTC37826 | Ca(ICC2/PI489777)SNP_15508 | 192  | C | G | 8  | 3   | --     | --  |
| CakTC28002 | Ca(ICC2/PI489777)SNP_15509 | 85   | C | T | 5  | 4   | Flower | bud |
|            | Ca(ICC2/PI489777)SNP_15510 | 93   | A | G | 5  | 4   | Flower | bud |
|            | Ca(ICC2/PI489777)SNP_15511 | 1107 | C | T | 3  | 4   | Flower | bud |
|            | Ca(ICC2/PI489777)SNP_15512 | 1153 | C | G | 4  | 4   | Flower | bud |
|            | Ca(ICC2/PI489777)SNP_15513 | 1363 | T | A | 5  | 4   | Flower | bud |
| CakTC42979 | Ca(ICC2/PI489777)SNP_15514 | 144  | A | C | 6  | 4   | --     | --  |
|            | Ca(ICC2/PI489777)SNP_15515 | 273  | T | C | 5  | 5   | --     | --  |
|            | Ca(ICC2/PI489777)SNP_15516 | 314  | C | T | 5  | 5   | --     | --  |
|            | Ca(ICC2/PI489777)SNP_15517 | 415  | A | G | 6  | 4   | --     | --  |
|            | Ca(ICC2/PI489777)SNP_15518 | 422  | C | T | 5  | 5   | --     | --  |
|            | Ca(ICC2/PI489777)SNP_15519 | 1013 | A | C | 5  | 5   | --     | --  |
|            | Ca(ICC2/PI489777)SNP_15520 | 1014 | C | A | 5  | 5   | --     | --  |
|            | Ca(ICC2/PI489777)SNP_15521 | 1047 | A | G | 5  | 6   | --     | --  |
|            | Ca(ICC2/PI489777)SNP_15522 | 1088 | G | T | 8  | 6   | --     | --  |
|            | Ca(ICC2/PI489777)SNP_15523 | 1104 | A | G | 8  | 6   | --     | --  |
|            | Ca(ICC2/PI489777)SNP_15524 | 1237 | T | G | 8  | 8   | --     | --  |
| CakTC42141 | Ca(ICC2/PI489777)SNP_15525 | 117  | C | T | 3  | 5   | --     | --  |
|            | Ca(ICC2/PI489777)SNP_15526 | 612  | G | A | 10 | 6   | --     | --  |
| CakTC26113 | Ca(ICC2/PI489777)SNP_15527 | 178  | C | T | 3  | 4   | --     | --  |
|            | Ca(ICC2/PI489777)SNP_15528 | 320  | A | C | 7  | 8   | --     | --  |
|            | Ca(ICC2/PI489777)SNP_15529 | 956  | T | C | 7  | 10  | --     | --  |
|            | Ca(ICC2/PI489777)SNP_15530 | 1119 | C | T | 9  | 5   | --     | --  |
|            | Ca(ICC2/PI489777)SNP_15531 | 1410 | T | C | 14 | 13  | --     | --  |
|            | Ca(ICC2/PI489777)SNP_15532 | 1476 | G | T | 12 | 15  | --     | --  |
| CakTC27689 | Ca(ICC2/PI489777)SNP_15533 | 582  | A | G | 3  | 3   | --     | --  |
|            | Ca(ICC2/PI489777)SNP_15534 | 608  | A | G | 3  | 3   | --     | --  |
| CakTC37622 | Ca(ICC2/PI489777)SNP_15535 | 102  | T | G | 16 | 7   | --     | --  |

|            |                            |      |   |   |     |    |      |           |
|------------|----------------------------|------|---|---|-----|----|------|-----------|
|            | Ca(ICC2/PI489777)SNP_15536 | 133  | G | C | 17  | 12 | --   | --        |
|            | Ca(ICC2/PI489777)SNP_15537 | 253  | T | C | 23  | 16 | --   | --        |
|            | Ca(ICC2/PI489777)SNP_15538 | 292  | A | G | 26  | 23 | --   | --        |
|            | Ca(ICC2/PI489777)SNP_15539 | 412  | T | C | 24  | 23 | --   | --        |
|            | Ca(ICC2/PI489777)SNP_15540 | 421  | T | G | 22  | 28 | --   | --        |
| CakTC27831 | Ca(ICC2/PI489777)SNP_15541 | 612  | C | T | 5   | 4  | --   | --        |
|            | Ca(ICC2/PI489777)SNP_15542 | 816  | G | A | 6   | 3  | --   | --        |
| CakTC27671 | Ca(ICC2/PI489777)SNP_15543 | 306  | G | A | 82  | 26 | --   | --        |
|            | Ca(ICC2/PI489777)SNP_15544 | 482  | A | G | 87  | 33 | --   | --        |
|            | Ca(ICC2/PI489777)SNP_15545 | 880  | G | C | 65  | 46 | --   | --        |
|            | Ca(ICC2/PI489777)SNP_15546 | 985  | G | T | 28  | 11 | --   | --        |
| CakTC34745 | Ca(ICC2/PI489777)SNP_15547 | 1614 | G | A | 5   | 5  | Root | --        |
|            | Ca(ICC2/PI489777)SNP_15548 | 2485 | G | A | 6   | 7  | Root | --        |
|            | Ca(ICC2/PI489777)SNP_15549 | 2515 | A | C | 5   | 7  | Root | --        |
|            | Ca(ICC2/PI489777)SNP_15550 | 2536 | A | G | 6   | 7  | Root | --        |
| CakTC38510 | Ca(ICC2/PI489777)SNP_15551 | 701  | G | A | 4   | 8  | --   | C2C2-GATA |
|            | Ca(ICC2/PI489777)SNP_15552 | 805  | T | C | 4   | 9  | --   | C2C2-GATA |
| CakTC37909 | Ca(ICC2/PI489777)SNP_15553 | 547  | T | G | 7   | 7  | --   | mTERF     |
|            | Ca(ICC2/PI489777)SNP_15554 | 619  | A | G | 8   | 6  | --   | mTERF     |
|            | Ca(ICC2/PI489777)SNP_15555 | 670  | A | G | 10  | 7  | --   | mTERF     |
| CakTC37918 | Ca(ICC2/PI489777)SNP_15556 | 495  | C | T | 7   | 5  | --   | HSF       |
|            | Ca(ICC2/PI489777)SNP_15557 | 747  | G | A | 12  | 4  | --   | HSF       |
| CakTC28110 | Ca(ICC2/PI489777)SNP_15558 | 3290 | C | T | 6   | 3  | --   | PHD       |
|            | Ca(ICC2/PI489777)SNP_15559 | 5035 | T | C | 3   | 3  | --   | PHD       |
| CakTC33756 | Ca(ICC2/PI489777)SNP_15560 | 233  | T | G | 14  | 10 | --   | --        |
| CakTC35352 | Ca(ICC2/PI489777)SNP_15561 | 69   | T | A | 8   | 5  | --   | --        |
|            | Ca(ICC2/PI489777)SNP_15562 | 72   | T | A | 8   | 5  | --   | --        |
|            | Ca(ICC2/PI489777)SNP_15563 | 300  | T | C | 9   | 5  | --   | --        |
|            | Ca(ICC2/PI489777)SNP_15564 | 3472 | A | C | 7   | 8  | --   | --        |
|            | Ca(ICC2/PI489777)SNP_15565 | 3565 | A | G | 8   | 8  | --   | --        |
|            | Ca(ICC2/PI489777)SNP_15566 | 3751 | C | T | 10  | 7  | --   | --        |
|            | Ca(ICC2/PI489777)SNP_15567 | 3815 | C | A | 8   | 5  | --   | --        |
| CakTC27851 | Ca(ICC2/PI489777)SNP_15568 | 420  | T | C | 3   | 3  | --   | --        |
|            | Ca(ICC2/PI489777)SNP_15569 | 624  | T | G | 3   | 5  | --   | --        |
|            | Ca(ICC2/PI489777)SNP_15570 | 635  | A | C | 3   | 6  | --   | --        |
|            | Ca(ICC2/PI489777)SNP_15571 | 678  | T | G | 4   | 5  | --   | --        |
|            | Ca(ICC2/PI489777)SNP_15572 | 887  | A | T | 8   | 6  | --   | --        |
|            | Ca(ICC2/PI489777)SNP_15573 | 1354 | A | G | 3   | 4  | --   | --        |
| CakTC27044 | Ca(ICC2/PI489777)SNP_15574 | 515  | A | C | 12  | 19 | --   | --        |
| CakTC10146 | Ca(ICC2/PI489777)SNP_15575 | 1226 | T | C | 5   | 4  | --   | --        |
| CakTC09932 | Ca(ICC2/PI489777)SNP_15576 | 723  | C | T | 9   | 7  | --   | --        |
|            | Ca(ICC2/PI489777)SNP_15577 | 746  | G | A | 9   | 5  | --   | --        |
|            | Ca(ICC2/PI489777)SNP_15578 | 1730 | G | A | 5   | 5  | --   | --        |
|            | Ca(ICC2/PI489777)SNP_15579 | 1837 | T | C | 4   | 6  | --   | --        |
|            | Ca(ICC2/PI489777)SNP_15580 | 1896 | G | C | 3   | 5  | --   | --        |
| CakTC41203 | Ca(ICC2/PI489777)SNP_15581 | 296  | G | C | 27  | 6  | --   | --        |
|            | Ca(ICC2/PI489777)SNP_15582 | 524  | T | C | 12  | 6  | --   | --        |
|            | Ca(ICC2/PI489777)SNP_15583 | 530  | T | C | 17  | 6  | --   | --        |
|            | Ca(ICC2/PI489777)SNP_15584 | 566  | G | A | 13  | 5  | --   | --        |
|            | Ca(ICC2/PI489777)SNP_15585 | 593  | C | A | 11  | 5  | --   | --        |
|            | Ca(ICC2/PI489777)SNP_15586 | 1134 | A | C | 25  | 13 | --   | --        |
|            | Ca(ICC2/PI489777)SNP_15587 | 1208 | T | A | 20  | 11 | --   | --        |
|            | Ca(ICC2/PI489777)SNP_15588 | 1697 | C | T | 8   | 4  | --   | --        |
|            | Ca(ICC2/PI489777)SNP_15589 | 2024 | G | A | 19  | 6  | --   | --        |
|            | Ca(ICC2/PI489777)SNP_15590 | 2045 | A | G | 18  | 4  | --   | --        |
| CakTC38294 | Ca(ICC2/PI489777)SNP_15591 | 660  | C | G | 37  | 29 | --   | --        |
|            | Ca(ICC2/PI489777)SNP_15592 | 661  | A | T | 36  | 29 | --   | --        |
|            | Ca(ICC2/PI489777)SNP_15593 | 784  | T | C | 27  | 33 | --   | --        |
|            | Ca(ICC2/PI489777)SNP_15594 | 795  | T | A | 35  | 27 | --   | --        |
| CakTC27569 | Ca(ICC2/PI489777)SNP_15595 | 310  | T | C | 216 | 52 | --   | --        |
|            | Ca(ICC2/PI489777)SNP_15596 | 932  | T | C | 244 | 46 | --   | --        |
| CakTC43292 | Ca(ICC2/PI489777)SNP_15597 | 131  | G | A | 9   | 11 | --   | --        |
|            | Ca(ICC2/PI489777)SNP_15598 | 407  | A | G | 5   | 9  | --   | --        |
|            | Ca(ICC2/PI489777)SNP_15599 | 433  | A | G | 8   | 9  | --   | --        |
|            | Ca(ICC2/PI489777)SNP_15600 | 621  | T | A | 7   | 7  | --   | --        |
| CakTC38982 | Ca(ICC2/PI489777)SNP_15601 | 878  | T | C | 7   | 8  | --   | --        |
|            | Ca(ICC2/PI489777)SNP_15602 | 941  | T | C | 4   | 11 | --   | --        |
|            | Ca(ICC2/PI489777)SNP_15603 | 1302 | G | A | 3   | 3  | --   | --        |
| CakTC35409 | Ca(ICC2/PI489777)SNP_15604 | 76   | C | T | 4   | 3  | --   | --        |
|            | Ca(ICC2/PI489777)SNP_15605 | 489  | C | T | 5   | 8  | --   | --        |
|            | Ca(ICC2/PI489777)SNP_15606 | 1953 | A | G | 22  | 9  | --   | --        |
|            | Ca(ICC2/PI489777)SNP_15607 | 2187 | C | T | 13  | 11 | --   | --        |
|            | Ca(ICC2/PI489777)SNP_15608 | 2286 | A | G | 11  | 10 | --   | --        |
|            | Ca(ICC2/PI489777)SNP_15609 | 2304 | T | C | 12  | 8  | --   | --        |

|            |                            |      |   |   |     |     |           |              |
|------------|----------------------------|------|---|---|-----|-----|-----------|--------------|
|            | Ca(ICC2/PI489777)SNP_15610 | 2691 | G | A | 18  | 18  | --        | --           |
|            | Ca(ICC2/PI489777)SNP_15611 | 3357 | A | G | 13  | 10  | --        | --           |
|            | Ca(ICC2/PI489777)SNP_15612 | 3489 | C | T | 18  | 8   | --        | --           |
|            | Ca(ICC2/PI489777)SNP_15613 | 3522 | T | C | 13  | 4   | --        | --           |
|            | Ca(ICC2/PI489777)SNP_15614 | 4012 | T | C | 15  | 23  | --        | --           |
|            | Ca(ICC2/PI489777)SNP_15615 | 4015 | G | C | 15  | 22  | --        | --           |
|            | Ca(ICC2/PI489777)SNP_15616 | 4039 | A | T | 14  | 21  | --        | --           |
|            | Ca(ICC2/PI489777)SNP_15617 | 4175 | G | A | 12  | 12  | --        | --           |
| CakTC18036 | Ca(ICC2/PI489777)SNP_15618 | 781  | A | G | 30  | 10  | --        | --           |
| CakTC24343 | Ca(ICC2/PI489777)SNP_15619 | 2005 | G | A | 8   | 7   | --        | --           |
| CakTC40189 | Ca(ICC2/PI489777)SNP_15620 | 120  | A | T | 8   | 3   | --        | --           |
|            | Ca(ICC2/PI489777)SNP_15621 | 308  | T | C | 26  | 9   | --        | --           |
| CakTC29740 | Ca(ICC2/PI489777)SNP_15622 | 1254 | C | T | 8   | 4   | --        | SWI/SNF-SWI3 |
|            | Ca(ICC2/PI489777)SNP_15623 | 3622 | T | C | 9   | 5   | --        | SWI/SNF-SWI3 |
|            | Ca(ICC2/PI489777)SNP_15624 | 6040 | C | T | 14  | 3   | --        | SWI/SNF-SWI3 |
| CakTC30121 | Ca(ICC2/PI489777)SNP_15625 | 853  | T | C | 8   | 5   | --        | --           |
|            | Ca(ICC2/PI489777)SNP_15626 | 1001 | A | T | 8   | 3   | --        | --           |
|            | Ca(ICC2/PI489777)SNP_15627 | 1045 | A | G | 9   | 4   | --        | --           |
|            | Ca(ICC2/PI489777)SNP_15628 | 1178 | G | A | 9   | 7   | --        | --           |
|            | Ca(ICC2/PI489777)SNP_15629 | 1277 | A | T | 6   | 7   | --        | --           |
|            | Ca(ICC2/PI489777)SNP_15630 | 1733 | A | G | 3   | 3   | --        | --           |
|            | Ca(ICC2/PI489777)SNP_15631 | 2382 | A | G | 5   | 4   | --        | --           |
|            | Ca(ICC2/PI489777)SNP_15632 | 2536 | C | G | 7   | 3   | --        | --           |
|            | Ca(ICC2/PI489777)SNP_15633 | 2569 | G | T | 6   | 3   | --        | --           |
|            | Ca(ICC2/PI489777)SNP_15634 | 2680 | T | C | 6   | 5   | --        | --           |
|            | Ca(ICC2/PI489777)SNP_15635 | 2916 | G | A | 11  | 3   | --        | --           |
| CakTC38777 | Ca(ICC2/PI489777)SNP_15636 | 332  | A | G | 12  | 12  | --        | --           |
|            | Ca(ICC2/PI489777)SNP_15637 | 337  | T | C | 12  | 7   | --        | --           |
|            | Ca(ICC2/PI489777)SNP_15638 | 679  | A | G | 14  | 7   | --        | --           |
|            | Ca(ICC2/PI489777)SNP_15639 | 771  | A | G | 14  | 4   | --        | --           |
|            | Ca(ICC2/PI489777)SNP_15640 | 891  | G | A | 14  | 6   | --        | --           |
|            | Ca(ICC2/PI489777)SNP_15641 | 941  | A | G | 16  | 4   | --        | --           |
|            | Ca(ICC2/PI489777)SNP_15642 | 1218 | T | C | 10  | 12  | --        | --           |
|            | Ca(ICC2/PI489777)SNP_15643 | 1379 | G | A | 17  | 10  | --        | --           |
| CakTC39063 | Ca(ICC2/PI489777)SNP_15644 | 1051 | A | G | 4   | 5   | --        | --           |
|            | Ca(ICC2/PI489777)SNP_15645 | 1491 | G | A | 4   | 6   | --        | --           |
| CakTC38640 | Ca(ICC2/PI489777)SNP_15646 | 478  | G | T | 8   | 3   | Young_pod | --           |
| CakTC25332 | Ca(ICC2/PI489777)SNP_15647 | 1363 | G | A | 5   | 3   | --        | --           |
| CakTC32186 | Ca(ICC2/PI489777)SNP_15648 | 300  | G | T | 18  | 16  | --        | --           |
|            | Ca(ICC2/PI489777)SNP_15649 | 435  | G | C | 16  | 17  | --        | --           |
|            | Ca(ICC2/PI489777)SNP_15650 | 647  | G | C | 17  | 20  | --        | --           |
|            | Ca(ICC2/PI489777)SNP_15651 | 684  | T | C | 17  | 19  | --        | --           |
|            | Ca(ICC2/PI489777)SNP_15652 | 1077 | G | T | 16  | 14  | --        | --           |
| CakTC09774 | Ca(ICC2/PI489777)SNP_15653 | 247  | A | G | 10  | 13  | --        | --           |
| CakTC41967 | Ca(ICC2/PI489777)SNP_15654 | 1677 | G | T | 29  | 7   | --        | --           |
| CakTC41175 | Ca(ICC2/PI489777)SNP_15655 | 626  | A | G | 8   | 6   | --        | --           |
|            | Ca(ICC2/PI489777)SNP_15656 | 1909 | G | A | 6   | 4   | --        | --           |
| CakTC35063 | Ca(ICC2/PI489777)SNP_15657 | 1249 | A | G | 19  | 12  | --        | --           |
|            | Ca(ICC2/PI489777)SNP_15658 | 1404 | G | A | 20  | 11  | --        | --           |
|            | Ca(ICC2/PI489777)SNP_15659 | 1591 | A | G | 12  | 7   | --        | --           |
|            | Ca(ICC2/PI489777)SNP_15660 | 1900 | T | G | 19  | 8   | --        | --           |
|            | Ca(ICC2/PI489777)SNP_15661 | 1923 | G | A | 24  | 8   | --        | --           |
|            | Ca(ICC2/PI489777)SNP_15662 | 2023 | A | G | 19  | 12  | --        | --           |
|            | Ca(ICC2/PI489777)SNP_15663 | 2719 | C | T | 27  | 10  | --        | --           |
|            | Ca(ICC2/PI489777)SNP_15664 | 3458 | T | A | 25  | 5   | --        | --           |
|            | Ca(ICC2/PI489777)SNP_15665 | 3554 | C | T | 19  | 6   | --        | --           |
| CakTC38845 | Ca(ICC2/PI489777)SNP_15666 | 333  | G | A | 3   | 13  | --        | --           |
|            | Ca(ICC2/PI489777)SNP_15667 | 594  | T | A | 13  | 10  | --        | --           |
|            | Ca(ICC2/PI489777)SNP_15668 | 642  | A | T | 13  | 9   | --        | --           |
|            | Ca(ICC2/PI489777)SNP_15669 | 990  | C | T | 11  | 4   | --        | --           |
| CakTC42623 | Ca(ICC2/PI489777)SNP_15670 | 420  | T | C | 136 | 118 | --        | --           |
| CakTC40810 | Ca(ICC2/PI489777)SNP_15671 | 293  | T | C | 23  | 13  | --        | --           |
|            | Ca(ICC2/PI489777)SNP_15672 | 1167 | A | T | 22  | 23  | --        | --           |
|            | Ca(ICC2/PI489777)SNP_15673 | 1443 | A | G | 25  | 17  | --        | --           |
| CakTC34241 | Ca(ICC2/PI489777)SNP_15674 | 265  | T | C | 5   | 3   | --        | --           |
| CakTC43056 | Ca(ICC2/PI489777)SNP_15675 | 1168 | C | A | 24  | 6   | --        | --           |
| CakTC24777 | Ca(ICC2/PI489777)SNP_15676 | 233  | G | A | 40  | 18  | --        | --           |
|            | Ca(ICC2/PI489777)SNP_15677 | 1429 | G | T | 4   | 5   | --        | --           |
|            | Ca(ICC2/PI489777)SNP_15678 | 1430 | T | C | 4   | 5   | --        | --           |
|            | Ca(ICC2/PI489777)SNP_15679 | 1463 | A | G | 7   | 6   | --        | --           |
|            | Ca(ICC2/PI489777)SNP_15680 | 1513 | T | G | 6   | 6   | --        | --           |
|            | Ca(ICC2/PI489777)SNP_15681 | 1523 | A | C | 6   | 6   | --        | --           |
|            | Ca(ICC2/PI489777)SNP_15682 | 1635 | A | T | 9   | 3   | --        | --           |
|            | Ca(ICC2/PI489777)SNP_15683 | 1657 | A | G | 9   | 3   | --        | --           |

|            |                            |      |   |   |    |    |           |         |
|------------|----------------------------|------|---|---|----|----|-----------|---------|
|            | Ca(ICC2/PI489777)SNP_15684 | 1658 | G | A | 7  | 3  | --        | --      |
|            | Ca(ICC2/PI489777)SNP_15685 | 2178 | C | T | 89 | 33 | --        | --      |
|            | Ca(ICC2/PI489777)SNP_15686 | 2325 | T | C | 77 | 31 | --        | --      |
| CakTC31109 | Ca(ICC2/PI489777)SNP_15687 | 897  | T | C | 10 | 7  | --        | --      |
|            | Ca(ICC2/PI489777)SNP_15688 | 910  | C | T | 10 | 7  | --        | --      |
|            | Ca(ICC2/PI489777)SNP_15689 | 930  | A | T | 10 | 6  | --        | --      |
|            | Ca(ICC2/PI489777)SNP_15690 | 958  | G | A | 9  | 4  | --        | --      |
|            | Ca(ICC2/PI489777)SNP_15691 | 985  | A | T | 9  | 4  | --        | --      |
|            | Ca(ICC2/PI489777)SNP_15692 | 988  | A | G | 7  | 4  | --        | --      |
|            | Ca(ICC2/PI489777)SNP_15693 | 1180 | G | A | 6  | 5  | --        | --      |
|            | Ca(ICC2/PI489777)SNP_15694 | 1225 | A | G | 6  | 6  | --        | --      |
|            | Ca(ICC2/PI489777)SNP_15695 | 1234 | G | A | 6  | 5  | --        | --      |
| CakTC32605 | Ca(ICC2/PI489777)SNP_15696 | 445  | G | A | 13 | 6  | Young_pod | --      |
|            | Ca(ICC2/PI489777)SNP_15697 | 454  | C | T | 12 | 6  | Young_pod | --      |
|            | Ca(ICC2/PI489777)SNP_15698 | 457  | T | C | 13 | 6  | Young_pod | --      |
|            | Ca(ICC2/PI489777)SNP_15699 | 475  | A | G | 13 | 4  | Young_pod | --      |
| CakTC40682 | Ca(ICC2/PI489777)SNP_15700 | 429  | C | T | 6  | 9  | --        | --      |
|            | Ca(ICC2/PI489777)SNP_15701 | 1350 | G | C | 5  | 3  | --        | --      |
| CakTC25150 | Ca(ICC2/PI489777)SNP_15702 | 889  | T | A | 11 | 9  | --        | ABI3VP1 |
|            | Ca(ICC2/PI489777)SNP_15703 | 964  | A | G | 15 | 17 | --        | ABI3VP1 |
|            | Ca(ICC2/PI489777)SNP_15704 | 1118 | G | T | 17 | 16 | --        | ABI3VP1 |
|            | Ca(ICC2/PI489777)SNP_15705 | 1175 | C | T | 14 | 11 | --        | ABI3VP1 |
|            | Ca(ICC2/PI489777)SNP_15706 | 1244 | A | T | 15 | 10 | --        | ABI3VP1 |
|            | Ca(ICC2/PI489777)SNP_15707 | 1272 | G | C | 13 | 8  | --        | ABI3VP1 |
| CakTC39084 | Ca(ICC2/PI489777)SNP_15708 | 173  | C | T | 11 | 3  | --        | --      |
|            | Ca(ICC2/PI489777)SNP_15709 | 306  | C | A | 10 | 6  | --        | --      |
|            | Ca(ICC2/PI489777)SNP_15710 | 307  | C | A | 10 | 6  | --        | --      |
|            | Ca(ICC2/PI489777)SNP_15711 | 784  | A | T | 13 | 4  | --        | --      |
|            | Ca(ICC2/PI489777)SNP_15712 | 971  | A | G | 9  | 4  | --        | --      |
| CakTC40002 | Ca(ICC2/PI489777)SNP_15713 | 977  | T | A | 4  | 8  | Root      | --      |
| CakTC28463 | Ca(ICC2/PI489777)SNP_15714 | 455  | A | T | 7  | 3  | --        | --      |
| CakTC39007 | Ca(ICC2/PI489777)SNP_15715 | 75   | T | C | 3  | 7  | --        | --      |
|            | Ca(ICC2/PI489777)SNP_15716 | 91   | C | T | 3  | 9  | --        | --      |
|            | Ca(ICC2/PI489777)SNP_15717 | 116  | C | G | 4  | 9  | --        | --      |
|            | Ca(ICC2/PI489777)SNP_15718 | 118  | A | T | 4  | 9  | --        | --      |
|            | Ca(ICC2/PI489777)SNP_15719 | 134  | G | C | 4  | 10 | --        | --      |
|            | Ca(ICC2/PI489777)SNP_15720 | 927  | C | T | 6  | 6  | --        | --      |
|            | Ca(ICC2/PI489777)SNP_15721 | 1150 | T | A | 5  | 3  | --        | --      |
|            | Ca(ICC2/PI489777)SNP_15722 | 1154 | G | A | 4  | 3  | --        | --      |
|            | Ca(ICC2/PI489777)SNP_15723 | 1162 | G | A | 5  | 3  | --        | --      |
| CakTC26696 | Ca(ICC2/PI489777)SNP_15724 | 863  | G | A | 10 | 4  | --        | --      |
|            | Ca(ICC2/PI489777)SNP_15725 | 874  | C | A | 10 | 4  | --        | --      |
|            | Ca(ICC2/PI489777)SNP_15726 | 920  | G | A | 10 | 5  | --        | --      |
|            | Ca(ICC2/PI489777)SNP_15727 | 995  | G | A | 8  | 6  | --        | --      |
|            | Ca(ICC2/PI489777)SNP_15728 | 1250 | G | A | 19 | 7  | --        | --      |
|            | Ca(ICC2/PI489777)SNP_15729 | 1382 | A | G | 18 | 10 | --        | --      |
|            | Ca(ICC2/PI489777)SNP_15730 | 1391 | A | G | 19 | 9  | --        | --      |
|            | Ca(ICC2/PI489777)SNP_15731 | 1569 | T | C | 8  | 6  | --        | --      |
| CakTC23500 | Ca(ICC2/PI489777)SNP_15732 | 194  | C | T | 17 | 5  | --        | --      |
|            | Ca(ICC2/PI489777)SNP_15733 | 427  | C | T | 16 | 5  | --        | --      |
|            | Ca(ICC2/PI489777)SNP_15734 | 464  | C | A | 13 | 5  | --        | --      |
|            | Ca(ICC2/PI489777)SNP_15735 | 665  | T | C | 4  | 3  | --        | --      |
|            | Ca(ICC2/PI489777)SNP_15736 | 712  | A | G | 4  | 5  | --        | --      |
|            | Ca(ICC2/PI489777)SNP_15737 | 843  | T | C | 3  | 6  | --        | --      |
|            | Ca(ICC2/PI489777)SNP_15738 | 2326 | T | C | 31 | 11 | --        | --      |
|            | Ca(ICC2/PI489777)SNP_15739 | 3376 | G | T | 25 | 14 | --        | --      |
| CakTC29872 | Ca(ICC2/PI489777)SNP_15740 | 2694 | G | A | 3  | 3  | --        | --      |
|            | Ca(ICC2/PI489777)SNP_15741 | 2718 | A | G | 3  | 3  | --        | --      |
| CakTC33967 | Ca(ICC2/PI489777)SNP_15742 | 548  | T | C | 4  | 3  | Flower    | bud     |
|            | Ca(ICC2/PI489777)SNP_15743 | 690  | T | G | 5  | 4  | Flower    | bud     |
|            | Ca(ICC2/PI489777)SNP_15744 | 694  | C | T | 5  | 4  | Flower    | bud     |
| CakTC37895 | Ca(ICC2/PI489777)SNP_15745 | 490  | T | C | 4  | 5  | --        | bHLH    |
| CakTC26859 | Ca(ICC2/PI489777)SNP_15746 | 1122 | T | C | 3  | 12 | --        | --      |
|            | Ca(ICC2/PI489777)SNP_15747 | 1673 | C | G | 16 | 4  | --        | --      |
|            | Ca(ICC2/PI489777)SNP_15748 | 1706 | C | T | 14 | 7  | --        | --      |
|            | Ca(ICC2/PI489777)SNP_15749 | 1997 | C | T | 9  | 13 | --        | --      |
|            | Ca(ICC2/PI489777)SNP_15750 | 4280 | C | T | 7  | 7  | --        | --      |
|            | Ca(ICC2/PI489777)SNP_15751 | 6281 | G | A | 10 | 7  | --        | --      |
|            | Ca(ICC2/PI489777)SNP_15752 | 6401 | G | A | 9  | 6  | --        | --      |
| CakTC40785 | Ca(ICC2/PI489777)SNP_15753 | 901  | C | T | 11 | 16 | --        | --      |
| CakTC09181 | Ca(ICC2/PI489777)SNP_15754 | 473  | A | G | 7  | 6  | --        | --      |
|            | Ca(ICC2/PI489777)SNP_15755 | 496  | T | C | 6  | 6  | --        | --      |
|            | Ca(ICC2/PI489777)SNP_15756 | 554  | G | A | 10 | 6  | --        | --      |
|            | Ca(ICC2/PI489777)SNP_15757 | 597  | C | T | 13 | 6  | --        | --      |

|            |                             |      |   |   |     |     |      |           |
|------------|-----------------------------|------|---|---|-----|-----|------|-----------|
|            | Ca(ICCV2/PI489777)SNP_15758 | 713  | T | C | 14  | 5   | --   | --        |
| CakTC37689 | Ca(ICCV2/PI489777)SNP_15759 | 921  | C | A | 11  | 9   | --   | --        |
| CakTC35999 | Ca(ICCV2/PI489777)SNP_15760 | 305  | A | G | 32  | 33  | --   | --        |
|            | Ca(ICCV2/PI489777)SNP_15761 | 1273 | G | A | 54  | 39  | --   | --        |
|            | Ca(ICCV2/PI489777)SNP_15762 | 2077 | A | G | 21  | 56  | --   | --        |
|            | Ca(ICCV2/PI489777)SNP_15763 | 3083 | G | C | 15  | 28  | --   | --        |
|            | Ca(ICCV2/PI489777)SNP_15764 | 3152 | T | G | 10  | 10  | --   | --        |
| CakTC43097 | Ca(ICCV2/PI489777)SNP_15765 | 781  | G | A | 10  | 3   | --   | --        |
| CakTC11046 | Ca(ICCV2/PI489777)SNP_15766 | 488  | T | C | 143 | 146 | --   | --        |
| CakTC10831 | Ca(ICCV2/PI489777)SNP_15767 | 84   | C | T | 12  | 21  | --   | --        |
| CakTC23767 | Ca(ICCV2/PI489777)SNP_15768 | 1172 | T | A | 4   | 5   | --   | --        |
|            | Ca(ICCV2/PI489777)SNP_15769 | 1173 | T | C | 5   | 5   | --   | --        |
|            | Ca(ICCV2/PI489777)SNP_15770 | 1384 | A | G | 3   | 4   | --   | --        |
|            | Ca(ICCV2/PI489777)SNP_15771 | 2595 | T | C | 20  | 6   | --   | --        |
|            | Ca(ICCV2/PI489777)SNP_15772 | 2619 | T | C | 21  | 5   | --   | --        |
|            | Ca(ICCV2/PI489777)SNP_15773 | 2652 | C | T | 19  | 5   | --   | --        |
| CakTC32632 | Ca(ICCV2/PI489777)SNP_15774 | 1947 | T | C | 17  | 11  | --   | --        |
|            | Ca(ICCV2/PI489777)SNP_15775 | 2040 | A | C | 12  | 10  | --   | --        |
| CakTC31004 | Ca(ICCV2/PI489777)SNP_15776 | 1388 | A | C | 4   | 4   | --   | --        |
|            | Ca(ICCV2/PI489777)SNP_15777 | 1423 | C | T | 4   | 4   | --   | --        |
| CakTC42336 | Ca(ICCV2/PI489777)SNP_15778 | 747  | T | C | 19  | 19  | --   | --        |
| CakTC39477 | Ca(ICCV2/PI489777)SNP_15779 | 526  | G | A | 16  | 4   | --   | NAC       |
|            | Ca(ICCV2/PI489777)SNP_15780 | 802  | C | T | 25  | 9   | --   | NAC       |
|            | Ca(ICCV2/PI489777)SNP_15781 | 825  | G | A | 25  | 8   | --   | NAC       |
|            | Ca(ICCV2/PI489777)SNP_15782 | 931  | G | A | 17  | 7   | --   | NAC       |
| CakTC22818 | Ca(ICCV2/PI489777)SNP_15783 | 1494 | T | C | 9   | 4   | --   | --        |
| CakTC24678 | Ca(ICCV2/PI489777)SNP_15784 | 304  | G | A | 170 | 64  | --   | AP2-EREBP |
|            | Ca(ICCV2/PI489777)SNP_15785 | 488  | G | C | 146 | 58  | --   | AP2-EREBP |
|            | Ca(ICCV2/PI489777)SNP_15786 | 714  | T | G | 64  | 23  | --   | AP2-EREBP |
| CakTC13156 | Ca(ICCV2/PI489777)SNP_15787 | 196  | C | T | 15  | 4   | --   | --        |
| CakTC24434 | Ca(ICCV2/PI489777)SNP_15788 | 192  | A | T | 8   | 4   | --   | --        |
|            | Ca(ICCV2/PI489777)SNP_15789 | 782  | C | T | 8   | 4   | --   | --        |
|            | Ca(ICCV2/PI489777)SNP_15790 | 812  | T | C | 6   | 3   | --   | --        |
| CakTC09287 | Ca(ICCV2/PI489777)SNP_15791 | 620  | G | A | 6   | 3   | --   | --        |
| CakTC40767 | Ca(ICCV2/PI489777)SNP_15792 | 1850 | T | C | 15  | 6   | --   | --        |
| CakTC31182 | Ca(ICCV2/PI489777)SNP_15793 | 547  | G | A | 24  | 8   | --   | --        |
|            | Ca(ICCV2/PI489777)SNP_15794 | 1199 | C | G | 10  | 10  | --   | --        |
|            | Ca(ICCV2/PI489777)SNP_15795 | 2227 | G | A | 16  | 5   | --   | --        |
|            | Ca(ICCV2/PI489777)SNP_15796 | 2429 | G | A | 8   | 3   | --   | --        |
| CakTC26664 | Ca(ICCV2/PI489777)SNP_15797 | 485  | G | C | 24  | 8   | --   | --        |
|            | Ca(ICCV2/PI489777)SNP_15798 | 1120 | C | T | 32  | 5   | --   | --        |
| CakTC26495 | Ca(ICCV2/PI489777)SNP_15799 | 575  | A | C | 6   | 5   | --   | --        |
|            | Ca(ICCV2/PI489777)SNP_15800 | 965  | T | C | 11  | 3   | --   | --        |
|            | Ca(ICCV2/PI489777)SNP_15801 | 986  | G | A | 10  | 3   | --   | --        |
|            | Ca(ICCV2/PI489777)SNP_15802 | 1070 | C | A | 4   | 3   | --   | --        |
| CakTC31681 | Ca(ICCV2/PI489777)SNP_15803 | 282  | T | C | 12  | 3   | --   | --        |
|            | Ca(ICCV2/PI489777)SNP_15804 | 362  | A | G | 7   | 4   | --   | --        |
| CakTC40090 | Ca(ICCV2/PI489777)SNP_15805 | 194  | G | A | 3   | 7   | --   | --        |
|            | Ca(ICCV2/PI489777)SNP_15806 | 1013 | A | C | 6   | 3   | --   | --        |
|            | Ca(ICCV2/PI489777)SNP_15807 | 1033 | G | A | 5   | 3   | --   | --        |
|            | Ca(ICCV2/PI489777)SNP_15808 | 1035 | A | T | 5   | 3   | --   | --        |
| CakTC39512 | Ca(ICCV2/PI489777)SNP_15809 | 742  | C | T | 9   | 4   | --   | --        |
| CakTC12654 | Ca(ICCV2/PI489777)SNP_15810 | 640  | A | G | 5   | 3   | --   | --        |
| CakTC09835 | Ca(ICCV2/PI489777)SNP_15811 | 582  | C | T | 9   | 24  | Root | --        |
|            | Ca(ICCV2/PI489777)SNP_15812 | 765  | C | T | 7   | 9   | Root | --        |
|            | Ca(ICCV2/PI489777)SNP_15813 | 780  | A | G | 7   | 9   | Root | --        |
|            | Ca(ICCV2/PI489777)SNP_15814 | 852  | A | T | 6   | 10  | Root | --        |
|            | Ca(ICCV2/PI489777)SNP_15815 | 1101 | A | T | 6   | 4   | Root | --        |
|            | Ca(ICCV2/PI489777)SNP_15816 | 1284 | A | T | 10  | 14  | Root | --        |
| CakTC41375 | Ca(ICCV2/PI489777)SNP_15817 | 1392 | A | G | 11  | 6   | --   | --        |
|            | Ca(ICCV2/PI489777)SNP_15818 | 1683 | T | C | 14  | 5   | --   | --        |
|            | Ca(ICCV2/PI489777)SNP_15819 | 2216 | A | G | 7   | 4   | --   | --        |
|            | Ca(ICCV2/PI489777)SNP_15820 | 2450 | C | A | 4   | 4   | --   | --        |
| CakTC25819 | Ca(ICCV2/PI489777)SNP_15821 | 1514 | C | T | 7   | 4   | --   | --        |
|            | Ca(ICCV2/PI489777)SNP_15822 | 1539 | G | A | 8   | 3   | --   | --        |
|            | Ca(ICCV2/PI489777)SNP_15823 | 1574 | G | A | 10  | 3   | --   | --        |
|            | Ca(ICCV2/PI489777)SNP_15824 | 2121 | G | T | 7   | 5   | --   | --        |
|            | Ca(ICCV2/PI489777)SNP_15825 | 2337 | C | T | 6   | 3   | --   | --        |
|            | Ca(ICCV2/PI489777)SNP_15826 | 2343 | T | C | 6   | 4   | --   | --        |
| CakTC12183 | Ca(ICCV2/PI489777)SNP_15827 | 1178 | G | A | 11  | 3   | --   | --        |
|            | Ca(ICCV2/PI489777)SNP_15828 | 1658 | A | G | 21  | 7   | --   | --        |
|            | Ca(ICCV2/PI489777)SNP_15829 | 1829 | A | G | 20  | 11  | --   | --        |
|            | Ca(ICCV2/PI489777)SNP_15830 | 1915 | A | G | 11  | 10  | --   | --        |
| CakTC26011 | Ca(ICCV2/PI489777)SNP_15831 | 1086 | T | G | 8   | 7   | --   | --        |

|            |                            |      |   |   |     |    |        |      |
|------------|----------------------------|------|---|---|-----|----|--------|------|
|            | Ca(ICC2/PI489777)SNP_15832 | 2052 | A | G | 12  | 7  | --     | --   |
|            | Ca(ICC2/PI489777)SNP_15833 | 2234 | C | T | 6   | 3  | --     | --   |
| CakTC39294 | Ca(ICC2/PI489777)SNP_15834 | 988  | A | T | 19  | 12 | --     | --   |
| CakTC24283 | Ca(ICC2/PI489777)SNP_15835 | 554  | C | T | 6   | 3  | --     | --   |
| CakTC33213 | Ca(ICC2/PI489777)SNP_15836 | 892  | G | A | 43  | 18 | --     | --   |
|            | Ca(ICC2/PI489777)SNP_15837 | 955  | A | G | 26  | 10 | --     | --   |
|            | Ca(ICC2/PI489777)SNP_15838 | 1930 | T | A | 5   | 10 | --     | --   |
|            | Ca(ICC2/PI489777)SNP_15839 | 1986 | C | T | 4   | 9  | --     | --   |
| CakTC27480 | Ca(ICC2/PI489777)SNP_15840 | 511  | C | G | 37  | 27 | --     | --   |
|            | Ca(ICC2/PI489777)SNP_15841 | 512  | G | T | 37  | 27 | --     | --   |
| CakTC23340 | Ca(ICC2/PI489777)SNP_15842 | 32   | T | G | 12  | 30 | --     | --   |
|            | Ca(ICC2/PI489777)SNP_15843 | 167  | T | C | 20  | 34 | --     | --   |
|            | Ca(ICC2/PI489777)SNP_15844 | 261  | C | G | 63  | 87 | --     | --   |
|            | Ca(ICC2/PI489777)SNP_15845 | 735  | G | A | 77  | 74 | --     | --   |
|            | Ca(ICC2/PI489777)SNP_15846 | 744  | T | C | 82  | 74 | --     | --   |
|            | Ca(ICC2/PI489777)SNP_15847 | 843  | T | C | 102 | 68 | --     | --   |
|            | Ca(ICC2/PI489777)SNP_15848 | 924  | T | A | 111 | 71 | --     | --   |
| CakTC31126 | Ca(ICC2/PI489777)SNP_15849 | 1078 | C | T | 3   | 4  | Flower | bud  |
|            | Ca(ICC2/PI489777)SNP_15850 | 1109 | C | A | 3   | 4  | Flower | bud  |
| CakTC34729 | Ca(ICC2/PI489777)SNP_15851 | 980  | A | T | 11  | 4  | --     | --   |
|            | Ca(ICC2/PI489777)SNP_15852 | 1038 | A | T | 12  | 4  | --     | --   |
|            | Ca(ICC2/PI489777)SNP_15853 | 2244 | A | G | 11  | 6  | --     | --   |
| CakTC10024 | Ca(ICC2/PI489777)SNP_15854 | 413  | C | G | 5   | 4  | --     | C3H  |
|            | Ca(ICC2/PI489777)SNP_15855 | 426  | A | G | 5   | 3  | --     | C3H  |
|            | Ca(ICC2/PI489777)SNP_15856 | 1377 | C | T | 6   | 4  | --     | C3H  |
| CakTC31546 | Ca(ICC2/PI489777)SNP_15857 | 1030 | T | A | 3   | 3  | --     | --   |
| CakTC37765 | Ca(ICC2/PI489777)SNP_15858 | 751  | T | C | 16  | 12 | --     | --   |
|            | Ca(ICC2/PI489777)SNP_15859 | 894  | A | T | 8   | 6  | --     | --   |
| CakTC29157 | Ca(ICC2/PI489777)SNP_15860 | 381  | A | T | 50  | 12 | --     | --   |
| CakTC34743 | Ca(ICC2/PI489777)SNP_15861 | 196  | G | C | 8   | 3  | --     | --   |
|            | Ca(ICC2/PI489777)SNP_15862 | 257  | T | C | 5   | 6  | --     | --   |
|            | Ca(ICC2/PI489777)SNP_15863 | 291  | G | A | 8   | 6  | --     | --   |
|            | Ca(ICC2/PI489777)SNP_15864 | 317  | G | C | 10  | 6  | --     | --   |
|            | Ca(ICC2/PI489777)SNP_15865 | 1820 | T | C | 19  | 5  | --     | --   |
|            | Ca(ICC2/PI489777)SNP_15866 | 1966 | G | A | 23  | 5  | --     | --   |
|            | Ca(ICC2/PI489777)SNP_15867 | 2048 | T | C | 20  | 4  | --     | --   |
|            | Ca(ICC2/PI489777)SNP_15868 | 2049 | G | A | 20  | 4  | --     | --   |
|            | Ca(ICC2/PI489777)SNP_15869 | 2108 | T | C | 21  | 4  | --     | --   |
|            | Ca(ICC2/PI489777)SNP_15870 | 2206 | A | G | 11  | 5  | --     | --   |
|            | Ca(ICC2/PI489777)SNP_15871 | 2426 | C | T | 7   | 5  | --     | --   |
|            | Ca(ICC2/PI489777)SNP_15872 | 2543 | C | T | 10  | 8  | --     | --   |
|            | Ca(ICC2/PI489777)SNP_15873 | 2636 | T | A | 9   | 6  | --     | --   |
|            | Ca(ICC2/PI489777)SNP_15874 | 2676 | T | A | 10  | 4  | --     | --   |
|            | Ca(ICC2/PI489777)SNP_15875 | 2695 | T | C | 11  | 5  | --     | --   |
|            | Ca(ICC2/PI489777)SNP_15876 | 2897 | T | C | 13  | 4  | --     | --   |
|            | Ca(ICC2/PI489777)SNP_15877 | 2925 | G | A | 11  | 5  | --     | --   |
|            | Ca(ICC2/PI489777)SNP_15878 | 2952 | A | G | 12  | 5  | --     | --   |
|            | Ca(ICC2/PI489777)SNP_15879 | 3014 | G | A | 12  | 3  | --     | --   |
|            | Ca(ICC2/PI489777)SNP_15880 | 3020 | G | A | 13  | 3  | --     | --   |
| CakTC04716 | Ca(ICC2/PI489777)SNP_15881 | 836  | A | C | 3   | 16 | --     | --   |
| CakTC17795 | Ca(ICC2/PI489777)SNP_15882 | 644  | G | C | 8   | 3  | --     | --   |
|            | Ca(ICC2/PI489777)SNP_15883 | 661  | A | G | 8   | 3  | --     | --   |
| CakTC39859 | Ca(ICC2/PI489777)SNP_15884 | 150  | T | C | 10  | 4  | --     | --   |
|            | Ca(ICC2/PI489777)SNP_15885 | 915  | G | A | 14  | 11 | --     | --   |
|            | Ca(ICC2/PI489777)SNP_15886 | 978  | C | T | 8   | 10 | --     | --   |
| CakTC10431 | Ca(ICC2/PI489777)SNP_15887 | 230  | A | G | 8   | 5  | --     | --   |
|            | Ca(ICC2/PI489777)SNP_15888 | 636  | G | A | 16  | 4  | --     | --   |
| CakTC25975 | Ca(ICC2/PI489777)SNP_15889 | 200  | C | T | 17  | 4  | --     | --   |
| CakTC41318 | Ca(ICC2/PI489777)SNP_15890 | 79   | A | C | 4   | 5  | --     | --   |
| CakTC34658 | Ca(ICC2/PI489777)SNP_15891 | 270  | C | T | 10  | 8  | --     | --   |
|            | Ca(ICC2/PI489777)SNP_15892 | 303  | C | T | 11  | 8  | --     | --   |
|            | Ca(ICC2/PI489777)SNP_15893 | 336  | C | T | 10  | 8  | --     | --   |
| CakTC34182 | Ca(ICC2/PI489777)SNP_15894 | 135  | C | T | 3   | 6  | --     | --   |
|            | Ca(ICC2/PI489777)SNP_15895 | 320  | T | G | 6   | 7  | --     | --   |
|            | Ca(ICC2/PI489777)SNP_15896 | 347  | A | C | 6   | 3  | --     | --   |
| CakTC31910 | Ca(ICC2/PI489777)SNP_15897 | 568  | C | T | 11  | 4  | --     | SAP  |
|            | Ca(ICC2/PI489777)SNP_15898 | 778  | G | T | 12  | 6  | --     | SAP  |
|            | Ca(ICC2/PI489777)SNP_15899 | 3731 | G | A | 9   | 12 | --     | SAP  |
|            | Ca(ICC2/PI489777)SNP_15900 | 4319 | G | T | 9   | 4  | --     | SAP  |
|            | Ca(ICC2/PI489777)SNP_15901 | 4322 | A | C | 9   | 4  | --     | SAP  |
|            | Ca(ICC2/PI489777)SNP_15902 | 4400 | T | C | 9   | 4  | --     | SAP  |
|            | Ca(ICC2/PI489777)SNP_15903 | 4678 | G | A | 12  | 10 | --     | SAP  |
|            | Ca(ICC2/PI489777)SNP_15904 | 4806 | G | T | 8   | 7  | --     | SAP  |
| CakTC31411 | Ca(ICC2/PI489777)SNP_15905 | 2463 | T | C | 3   | 3  | --     | C2H2 |

|            |                             |      |   |   |     |    |      |         |
|------------|-----------------------------|------|---|---|-----|----|------|---------|
| CakTC39718 | Ca(ICCV2/PI489777)SNP_15906 | 421  | A | G | 22  | 8  | --   | --      |
|            | Ca(ICCV2/PI489777)SNP_15907 | 1216 | G | A | 59  | 11 | --   | --      |
|            | Ca(ICCV2/PI489777)SNP_15908 | 1253 | A | G | 36  | 5  | --   | --      |
|            | Ca(ICCV2/PI489777)SNP_15909 | 1256 | A | G | 36  | 5  | --   | --      |
| CakTC40911 | Ca(ICCV2/PI489777)SNP_15910 | 719  | G | T | 26  | 21 | --   | --      |
| CakTC33640 | Ca(ICCV2/PI489777)SNP_15911 | 1158 | G | A | 12  | 4  | --   | TPR     |
| CakTC31601 | Ca(ICCV2/PI489777)SNP_15912 | 1015 | T | C | 4   | 4  | --   | Jumonji |
| CakTC38210 | Ca(ICCV2/PI489777)SNP_15913 | 320  | A | G | 9   | 24 | --   | --      |
|            | Ca(ICCV2/PI489777)SNP_15914 | 335  | A | G | 7   | 24 | --   | --      |
| CakTC40797 | Ca(ICCV2/PI489777)SNP_15915 | 1501 | A | G | 50  | 33 | --   | --      |
|            | Ca(ICCV2/PI489777)SNP_15916 | 1712 | G | A | 63  | 33 | --   | --      |
|            | Ca(ICCV2/PI489777)SNP_15917 | 1734 | C | G | 58  | 35 | --   | --      |
|            | Ca(ICCV2/PI489777)SNP_15918 | 1792 | T | A | 61  | 35 | --   | --      |
| CakTC32469 | Ca(ICCV2/PI489777)SNP_15919 | 632  | A | G | 5   | 12 | --   | --      |
|            | Ca(ICCV2/PI489777)SNP_15920 | 1185 | T | A | 7   | 4  | --   | --      |
| CakTC40194 | Ca(ICCV2/PI489777)SNP_15921 | 1227 | T | G | 26  | 33 | --   | --      |
| CakTC41992 | Ca(ICCV2/PI489777)SNP_15922 | 175  | A | G | 33  | 23 | --   | --      |
| CakTC38576 | Ca(ICCV2/PI489777)SNP_15923 | 967  | A | T | 46  | 40 | --   | --      |
|            | Ca(ICCV2/PI489777)SNP_15924 | 1053 | C | T | 41  | 26 | --   | --      |
|            | Ca(ICCV2/PI489777)SNP_15925 | 1066 | C | T | 40  | 30 | --   | --      |
| CakTC26025 | Ca(ICCV2/PI489777)SNP_15926 | 2449 | T | G | 4   | 12 | --   | --      |
|            | Ca(ICCV2/PI489777)SNP_15927 | 2466 | C | T | 4   | 12 | --   | --      |
|            | Ca(ICCV2/PI489777)SNP_15928 | 2490 | C | T | 3   | 12 | --   | --      |
| CakTC39911 | Ca(ICCV2/PI489777)SNP_15929 | 1457 | A | T | 10  | 16 | --   | --      |
| CakTC42210 | Ca(ICCV2/PI489777)SNP_15930 | 620  | A | C | 26  | 15 | --   | --      |
|            | Ca(ICCV2/PI489777)SNP_15931 | 1508 | C | T | 14  | 12 | --   | --      |
|            | Ca(ICCV2/PI489777)SNP_15932 | 1562 | G | T | 14  | 11 | --   | --      |
| CakTC25236 | Ca(ICCV2/PI489777)SNP_15933 | 369  | C | T | 13  | 4  | --   | bZIP    |
|            | Ca(ICCV2/PI489777)SNP_15934 | 403  | A | T | 11  | 5  | --   | bZIP    |
|            | Ca(ICCV2/PI489777)SNP_15935 | 444  | A | G | 13  | 6  | --   | bZIP    |
|            | Ca(ICCV2/PI489777)SNP_15936 | 445  | G | T | 13  | 6  | --   | bZIP    |
|            | Ca(ICCV2/PI489777)SNP_15937 | 482  | C | T | 15  | 4  | --   | bZIP    |
|            | Ca(ICCV2/PI489777)SNP_15938 | 652  | G | A | 20  | 6  | --   | bZIP    |
|            | Ca(ICCV2/PI489777)SNP_15939 | 798  | T | A | 45  | 28 | --   | bZIP    |
|            | Ca(ICCV2/PI489777)SNP_15940 | 813  | G | A | 51  | 29 | --   | bZIP    |
|            | Ca(ICCV2/PI489777)SNP_15941 | 859  | C | G | 53  | 28 | --   | bZIP    |
|            | Ca(ICCV2/PI489777)SNP_15942 | 1311 | G | C | 31  | 8  | --   | bZIP    |
| CakTC34498 | Ca(ICCV2/PI489777)SNP_15943 | 184  | C | T | 4   | 4  | --   | --      |
|            | Ca(ICCV2/PI489777)SNP_15944 | 187  | C | T | 4   | 4  | --   | --      |
|            | Ca(ICCV2/PI489777)SNP_15945 | 292  | T | C | 4   | 4  | --   | --      |
| CakTC42002 | Ca(ICCV2/PI489777)SNP_15946 | 34   | T | A | 3   | 3  | --   | --      |
| CakTC24439 | Ca(ICCV2/PI489777)SNP_15947 | 2159 | G | A | 56  | 25 | --   | --      |
|            | Ca(ICCV2/PI489777)SNP_15948 | 2846 | G | A | 13  | 3  | --   | --      |
| CakTC30029 | Ca(ICCV2/PI489777)SNP_15949 | 286  | T | A | 4   | 5  | Root | --      |
|            | Ca(ICCV2/PI489777)SNP_15950 | 919  | C | T | 3   | 5  | Root | --      |
|            | Ca(ICCV2/PI489777)SNP_15951 | 967  | C | T | 3   | 5  | Root | --      |
| CakTC09695 | Ca(ICCV2/PI489777)SNP_15952 | 180  | C | T | 3   | 20 | --   | --      |
|            | Ca(ICCV2/PI489777)SNP_15953 | 230  | T | G | 3   | 27 | --   | --      |
|            | Ca(ICCV2/PI489777)SNP_15954 | 344  | T | C | 24  | 40 | --   | --      |
|            | Ca(ICCV2/PI489777)SNP_15955 | 596  | A | G | 38  | 71 | --   | --      |
|            | Ca(ICCV2/PI489777)SNP_15956 | 683  | T | C | 32  | 70 | --   | --      |
| CakTC26748 | Ca(ICCV2/PI489777)SNP_15957 | 627  | C | A | 5   | 3  | --   | --      |
|            | Ca(ICCV2/PI489777)SNP_15958 | 635  | C | T | 4   | 3  | --   | --      |
|            | Ca(ICCV2/PI489777)SNP_15959 | 638  | T | C | 4   | 3  | --   | --      |
| CakTC29854 | Ca(ICCV2/PI489777)SNP_15960 | 2509 | G | C | 15  | 6  | --   | --      |
| CakTC35929 | Ca(ICCV2/PI489777)SNP_15961 | 831  | A | G | 64  | 20 | --   | --      |
|            | Ca(ICCV2/PI489777)SNP_15962 | 1089 | A | T | 46  | 20 | --   | --      |
|            | Ca(ICCV2/PI489777)SNP_15963 | 2186 | T | C | 34  | 18 | --   | --      |
| CakTC39003 | Ca(ICCV2/PI489777)SNP_15964 | 538  | G | A | 13  | 7  | --   | --      |
|            | Ca(ICCV2/PI489777)SNP_15965 | 883  | A | G | 3   | 6  | --   | --      |
| CakTC24413 | Ca(ICCV2/PI489777)SNP_15966 | 1181 | T | G | 27  | 23 | --   | --      |
| CakTC40693 | Ca(ICCV2/PI489777)SNP_15967 | 35   | G | C | 6   | 4  | --   | --      |
|            | Ca(ICCV2/PI489777)SNP_15968 | 495  | T | C | 61  | 49 | --   | --      |
|            | Ca(ICCV2/PI489777)SNP_15969 | 618  | A | G | 9   | 15 | --   | --      |
| CakTC40423 | Ca(ICCV2/PI489777)SNP_15970 | 119  | C | T | 18  | 5  | --   | --      |
|            | Ca(ICCV2/PI489777)SNP_15971 | 188  | G | A | 21  | 5  | --   | --      |
|            | Ca(ICCV2/PI489777)SNP_15972 | 213  | A | G | 21  | 6  | --   | --      |
|            | Ca(ICCV2/PI489777)SNP_15973 | 1013 | C | T | 36  | 21 | --   | --      |
|            | Ca(ICCV2/PI489777)SNP_15974 | 1019 | C | T | 36  | 20 | --   | --      |
| CakTC11123 | Ca(ICCV2/PI489777)SNP_15975 | 50   | G | A | 6   | 6  | --   | --      |
|            | Ca(ICCV2/PI489777)SNP_15976 | 1068 | T | C | 162 | 51 | --   | --      |
|            | Ca(ICCV2/PI489777)SNP_15977 | 1089 | A | T | 154 | 51 | --   | --      |
|            | Ca(ICCV2/PI489777)SNP_15978 | 1090 | A | G | 153 | 48 | --   | --      |
|            | Ca(ICCV2/PI489777)SNP_15979 | 1127 | A | G | 149 | 42 | --   | --      |



|            |                            |      |   |   |     |    |    |      |
|------------|----------------------------|------|---|---|-----|----|----|------|
|            | Ca(ICC2/PI489777)SNP_15980 | 1130 | A | G | 144 | 42 | -- | --   |
| CakTC31137 | Ca(ICC2/PI489777)SNP_15981 | 261  | G | A | 10  | 3  | -- | --   |
| CakTC36833 | Ca(ICC2/PI489777)SNP_15982 | 477  | T | C | 20  | 6  | -- | --   |
|            | Ca(ICC2/PI489777)SNP_15983 | 487  | G | T | 21  | 5  | -- | --   |
|            | Ca(ICC2/PI489777)SNP_15984 | 497  | C | A | 20  | 6  | -- | --   |
|            | Ca(ICC2/PI489777)SNP_15985 | 515  | A | G | 24  | 6  | -- | --   |
|            | Ca(ICC2/PI489777)SNP_15986 | 772  | A | G | 32  | 8  | -- | --   |
|            | Ca(ICC2/PI489777)SNP_15987 | 1170 | G | A | 17  | 10 | -- | --   |
|            | Ca(ICC2/PI489777)SNP_15988 | 1213 | A | C | 17  | 10 | -- | --   |
|            | Ca(ICC2/PI489777)SNP_15989 | 1604 | T | C | 12  | 10 | -- | --   |
|            | Ca(ICC2/PI489777)SNP_15990 | 1885 | T | A | 14  | 10 | -- | --   |
|            | Ca(ICC2/PI489777)SNP_15991 | 2662 | C | T | 15  | 11 | -- | --   |
|            | Ca(ICC2/PI489777)SNP_15992 | 2734 | T | C | 18  | 16 | -- | --   |
|            | Ca(ICC2/PI489777)SNP_15993 | 2845 | C | T | 14  | 13 | -- | --   |
|            | Ca(ICC2/PI489777)SNP_15994 | 2872 | T | C | 18  | 14 | -- | --   |
|            | Ca(ICC2/PI489777)SNP_15995 | 3244 | T | C | 15  | 9  | -- | --   |
|            | Ca(ICC2/PI489777)SNP_15996 | 3337 | T | C | 12  | 8  | -- | --   |
|            | Ca(ICC2/PI489777)SNP_15997 | 4381 | T | C | 19  | 13 | -- | --   |
|            | Ca(ICC2/PI489777)SNP_15998 | 4390 | C | T | 19  | 12 | -- | --   |
|            | Ca(ICC2/PI489777)SNP_15999 | 4411 | A | C | 16  | 9  | -- | --   |
|            | Ca(ICC2/PI489777)SNP_16000 | 4555 | A | G | 14  | 13 | -- | --   |
|            | Ca(ICC2/PI489777)SNP_16001 | 4638 | C | T | 12  | 10 | -- | --   |
| CakTC38670 | Ca(ICC2/PI489777)SNP_16002 | 201  | T | C | 15  | 5  | -- | --   |
|            | Ca(ICC2/PI489777)SNP_16003 | 205  | T | C | 16  | 5  | -- | --   |
|            | Ca(ICC2/PI489777)SNP_16004 | 268  | C | T | 16  | 5  | -- | --   |
|            | Ca(ICC2/PI489777)SNP_16005 | 1351 | T | C | 8   | 3  | -- | --   |
| CakTC29568 | Ca(ICC2/PI489777)SNP_16006 | 1357 | G | A | 7   | 3  | -- | --   |
| CakTC40637 | Ca(ICC2/PI489777)SNP_16007 | 685  | A | G | 23  | 11 | -- | WRKY |
|            | Ca(ICC2/PI489777)SNP_16008 | 1060 | G | T | 7   | 9  | -- | WRKY |
|            | Ca(ICC2/PI489777)SNP_16009 | 1387 | G | T | 14  | 4  | -- | WRKY |
| CakTC10522 | Ca(ICC2/PI489777)SNP_16010 | 1105 | C | T | 3   | 5  | -- | --   |
| CakTC37717 | Ca(ICC2/PI489777)SNP_16011 | 331  | G | T | 13  | 13 | -- | --   |
|            | Ca(ICC2/PI489777)SNP_16012 | 457  | A | G | 12  | 14 | -- | --   |
|            | Ca(ICC2/PI489777)SNP_16013 | 490  | G | A | 13  | 12 | -- | --   |
|            | Ca(ICC2/PI489777)SNP_16014 | 1209 | A | G | 9   | 18 | -- | --   |
| CakTC40097 | Ca(ICC2/PI489777)SNP_16015 | 493  | A | C | 5   | 6  | -- | --   |
| CakTC22960 | Ca(ICC2/PI489777)SNP_16016 | 447  | A | G | 72  | 64 | -- | --   |
|            | Ca(ICC2/PI489777)SNP_16017 | 825  | A | G | 75  | 53 | -- | --   |
|            | Ca(ICC2/PI489777)SNP_16018 | 873  | G | T | 65  | 53 | -- | --   |
|            | Ca(ICC2/PI489777)SNP_16019 | 2067 | A | G | 49  | 48 | -- | --   |
|            | Ca(ICC2/PI489777)SNP_16020 | 2597 | T | C | 17  | 10 | -- | --   |
|            | Ca(ICC2/PI489777)SNP_16021 | 2605 | G | A | 15  | 5  | -- | --   |
| CakTC39924 | Ca(ICC2/PI489777)SNP_16022 | 519  | T | C | 3   | 3  | -- | --   |
| CakTC43208 | Ca(ICC2/PI489777)SNP_16023 | 431  | T | C | 5   | 4  | -- | --   |
|            | Ca(ICC2/PI489777)SNP_16024 | 446  | G | A | 5   | 4  | -- | --   |
|            | Ca(ICC2/PI489777)SNP_16025 | 467  | A | G | 4   | 4  | -- | --   |
|            | Ca(ICC2/PI489777)SNP_16026 | 656  | A | G | 4   | 4  | -- | --   |
|            | Ca(ICC2/PI489777)SNP_16027 | 665  | A | C | 4   | 3  | -- | --   |
|            | Ca(ICC2/PI489777)SNP_16028 | 799  | C | T | 4   | 3  | -- | --   |
| CakTC43285 | Ca(ICC2/PI489777)SNP_16029 | 1253 | C | T | 5   | 4  | -- | --   |
|            | Ca(ICC2/PI489777)SNP_16030 | 1467 | C | A | 5   | 5  | -- | --   |
| CakTC33816 | Ca(ICC2/PI489777)SNP_16031 | 242  | A | G | 6   | 8  | -- | --   |
|            | Ca(ICC2/PI489777)SNP_16032 | 249  | A | T | 6   | 10 | -- | --   |
|            | Ca(ICC2/PI489777)SNP_16033 | 447  | T | C | 7   | 13 | -- | --   |
|            | Ca(ICC2/PI489777)SNP_16034 | 477  | A | G | 6   | 15 | -- | --   |
|            | Ca(ICC2/PI489777)SNP_16035 | 729  | A | G | 17  | 20 | -- | --   |
|            | Ca(ICC2/PI489777)SNP_16036 | 756  | T | C | 18  | 22 | -- | --   |
|            | Ca(ICC2/PI489777)SNP_16037 | 918  | T | C | 16  | 22 | -- | --   |
| CakTC10076 | Ca(ICC2/PI489777)SNP_16038 | 353  | T | G | 3   | 3  | -- | --   |
| CakTC37565 | Ca(ICC2/PI489777)SNP_16039 | 1108 | G | A | 5   | 4  | -- | --   |
|            | Ca(ICC2/PI489777)SNP_16040 | 1124 | A | G | 6   | 4  | -- | --   |
| CakTC26028 | Ca(ICC2/PI489777)SNP_16041 | 687  | C | T | 13  | 3  | -- | C2H2 |
|            | Ca(ICC2/PI489777)SNP_16042 | 1450 | G | A | 9   | 11 | -- | C2H2 |
|            | Ca(ICC2/PI489777)SNP_16043 | 1489 | G | T | 14  | 11 | -- | C2H2 |
| CakTC01590 | Ca(ICC2/PI489777)SNP_16044 | 272  | C | T | 3   | 8  | -- | --   |
|            | Ca(ICC2/PI489777)SNP_16045 | 279  | G | A | 3   | 9  | -- | --   |
|            | Ca(ICC2/PI489777)SNP_16046 | 323  | G | A | 3   | 10 | -- | --   |
| CakTC11414 | Ca(ICC2/PI489777)SNP_16047 | 315  | G | C | 52  | 30 | -- | --   |
|            | Ca(ICC2/PI489777)SNP_16048 | 316  | T | C | 51  | 30 | -- | --   |
|            | Ca(ICC2/PI489777)SNP_16049 | 335  | C | T | 52  | 30 | -- | --   |
| CakTC04081 | Ca(ICC2/PI489777)SNP_16050 | 1025 | G | T | 38  | 48 | -- | --   |
| CakTC40079 | Ca(ICC2/PI489777)SNP_16051 | 112  | G | A | 7   | 6  | -- | --   |
| CakTC08664 | Ca(ICC2/PI489777)SNP_16052 | 471  | C | T | 4   | 4  | -- | --   |
|            | Ca(ICC2/PI489777)SNP_16053 | 758  | A | T | 3   | 3  | -- | --   |

|            |                            |      |   |   |    |    |        |         |
|------------|----------------------------|------|---|---|----|----|--------|---------|
| CakTC33744 | Ca(ICC2/PI489777)SNP_16054 | 112  | G | A | 7  | 4  | --     | --      |
|            | Ca(ICC2/PI489777)SNP_16055 | 142  | A | G | 8  | 4  | --     | --      |
| CakTC32901 | Ca(ICC2/PI489777)SNP_16056 | 170  | A | C | 3  | 5  | --     | FHA     |
|            | Ca(ICC2/PI489777)SNP_16057 | 343  | T | A | 15 | 9  | --     | FHA     |
|            | Ca(ICC2/PI489777)SNP_16058 | 351  | T | C | 15 | 9  | --     | FHA     |
|            | Ca(ICC2/PI489777)SNP_16059 | 416  | G | T | 11 | 10 | --     | FHA     |
|            | Ca(ICC2/PI489777)SNP_16060 | 609  | G | A | 12 | 7  | --     | FHA     |
|            | Ca(ICC2/PI489777)SNP_16061 | 744  | A | T | 11 | 3  | --     | FHA     |
|            | Ca(ICC2/PI489777)SNP_16062 | 1080 | A | G | 12 | 5  | --     | FHA     |
|            | Ca(ICC2/PI489777)SNP_16063 | 1488 | C | T | 22 | 4  | --     | FHA     |
|            | Ca(ICC2/PI489777)SNP_16064 | 1562 | G | C | 18 | 7  | --     | FHA     |
|            | Ca(ICC2/PI489777)SNP_16065 | 1578 | G | C | 20 | 7  | --     | FHA     |
|            | Ca(ICC2/PI489777)SNP_16066 | 1650 | C | A | 6  | 3  | --     | FHA     |
|            | Ca(ICC2/PI489777)SNP_16067 | 1668 | T | C | 6  | 5  | --     | FHA     |
|            | Ca(ICC2/PI489777)SNP_16068 | 1677 | A | T | 6  | 4  | --     | FHA     |
|            | Ca(ICC2/PI489777)SNP_16069 | 1872 | T | C | 8  | 4  | --     | FHA     |
|            | Ca(ICC2/PI489777)SNP_16070 | 1932 | A | G | 6  | 3  | --     | FHA     |
|            | Ca(ICC2/PI489777)SNP_16071 | 2221 | G | C | 5  | 3  | --     | FHA     |
| CakTC39899 | Ca(ICC2/PI489777)SNP_16072 | 614  | G | A | 19 | 5  | --     | G2-like |
|            | Ca(ICC2/PI489777)SNP_16073 | 1201 | C | T | 11 | 5  | --     | G2-like |
|            | Ca(ICC2/PI489777)SNP_16074 | 1343 | A | G | 10 | 3  | --     | G2-like |
| CakTC36440 | Ca(ICC2/PI489777)SNP_16075 | 307  | G | A | 11 | 6  | --     | --      |
|            | Ca(ICC2/PI489777)SNP_16076 | 339  | T | C | 9  | 6  | --     | --      |
|            | Ca(ICC2/PI489777)SNP_16077 | 350  | A | G | 9  | 6  | --     | --      |
|            | Ca(ICC2/PI489777)SNP_16078 | 365  | T | C | 9  | 6  | --     | --      |
|            | Ca(ICC2/PI489777)SNP_16079 | 1290 | C | G | 20 | 4  | --     | --      |
|            | Ca(ICC2/PI489777)SNP_16080 | 1578 | T | C | 24 | 6  | --     | --      |
|            | Ca(ICC2/PI489777)SNP_16081 | 1611 | T | C | 15 | 4  | --     | --      |
|            | Ca(ICC2/PI489777)SNP_16082 | 2124 | C | T | 18 | 10 | --     | --      |
|            | Ca(ICC2/PI489777)SNP_16083 | 2292 | G | T | 10 | 9  | --     | --      |
|            | Ca(ICC2/PI489777)SNP_16084 | 2310 | G | A | 12 | 9  | --     | --      |
|            | Ca(ICC2/PI489777)SNP_16085 | 2547 | C | T | 10 | 10 | --     | --      |
|            | Ca(ICC2/PI489777)SNP_16086 | 2880 | G | A | 11 | 11 | --     | --      |
| CakTC26082 | Ca(ICC2/PI489777)SNP_16087 | 2325 | T | A | 16 | 15 | --     | --      |
| CakTC31763 | Ca(ICC2/PI489777)SNP_16088 | 1332 | G | C | 3  | 5  | Flower | bud     |
|            | Ca(ICC2/PI489777)SNP_16089 | 1757 | A | G | 4  | 6  | Flower | bud     |
|            | Ca(ICC2/PI489777)SNP_16090 | 1854 | G | A | 5  | 4  | Flower | bud     |
|            | Ca(ICC2/PI489777)SNP_16091 | 2418 | C | A | 5  | 5  | Flower | bud     |
| CakTC28704 | Ca(ICC2/PI489777)SNP_16092 | 1090 | A | G | 43 | 11 | --     | --      |
|            | Ca(ICC2/PI489777)SNP_16093 | 1102 | C | A | 45 | 13 | --     | --      |
|            | Ca(ICC2/PI489777)SNP_16094 | 1396 | A | G | 29 | 15 | --     | --      |
|            | Ca(ICC2/PI489777)SNP_16095 | 1651 | G | A | 34 | 8  | --     | --      |
|            | Ca(ICC2/PI489777)SNP_16096 | 2047 | G | A | 20 | 7  | --     | --      |
|            | Ca(ICC2/PI489777)SNP_16097 | 2113 | G | A | 27 | 9  | --     | --      |
|            | Ca(ICC2/PI489777)SNP_16098 | 2176 | G | T | 31 | 12 | --     | --      |
| CakTC32692 | Ca(ICC2/PI489777)SNP_16099 | 1376 | A | G | 7  | 5  | --     | --      |
|            | Ca(ICC2/PI489777)SNP_16100 | 1508 | A | C | 8  | 7  | --     | --      |
|            | Ca(ICC2/PI489777)SNP_16101 | 1511 | G | T | 8  | 7  | --     | --      |
|            | Ca(ICC2/PI489777)SNP_16102 | 1832 | T | G | 4  | 3  | --     | --      |
| CakTC27474 | Ca(ICC2/PI489777)SNP_16103 | 626  | A | G | 7  | 9  | --     | --      |
|            | Ca(ICC2/PI489777)SNP_16104 | 644  | T | G | 7  | 10 | --     | --      |
|            | Ca(ICC2/PI489777)SNP_16105 | 665  | A | C | 7  | 7  | --     | --      |
|            | Ca(ICC2/PI489777)SNP_16106 | 1319 | C | A | 8  | 6  | --     | --      |
|            | Ca(ICC2/PI489777)SNP_16107 | 1471 | A | G | 3  | 6  | --     | --      |
| CakTC42911 | Ca(ICC2/PI489777)SNP_16108 | 177  | G | A | 8  | 5  | --     | --      |
|            | Ca(ICC2/PI489777)SNP_16109 | 349  | G | A | 12 | 15 | --     | --      |
|            | Ca(ICC2/PI489777)SNP_16110 | 353  | A | T | 12 | 14 | --     | --      |
| CakTC24101 | Ca(ICC2/PI489777)SNP_16111 | 1250 | G | A | 19 | 3  | Flower | bud     |
|            | Ca(ICC2/PI489777)SNP_16112 | 1360 | A | G | 24 | 3  | Flower | bud     |
| CakTC29904 | Ca(ICC2/PI489777)SNP_16113 | 1239 | C | A | 4  | 3  | --     | --      |
| CakTC25803 | Ca(ICC2/PI489777)SNP_16114 | 866  | C | G | 34 | 8  | --     | --      |
|            | Ca(ICC2/PI489777)SNP_16115 | 911  | C | T | 35 | 9  | --     | --      |
|            | Ca(ICC2/PI489777)SNP_16116 | 1094 | A | G | 26 | 11 | --     | --      |
|            | Ca(ICC2/PI489777)SNP_16117 | 1135 | T | G | 19 | 11 | --     | --      |
|            | Ca(ICC2/PI489777)SNP_16118 | 1202 | C | T | 21 | 13 | --     | --      |
| CakTC40070 | Ca(ICC2/PI489777)SNP_16119 | 108  | C | G | 7  | 5  | --     | --      |
|            | Ca(ICC2/PI489777)SNP_16120 | 863  | C | T | 11 | 6  | --     | --      |
|            | Ca(ICC2/PI489777)SNP_16121 | 1344 | T | C | 9  | 5  | --     | --      |
|            | Ca(ICC2/PI489777)SNP_16122 | 1503 | G | A | 5  | 3  | --     | --      |
| CakTC09640 | Ca(ICC2/PI489777)SNP_16123 | 838  | A | G | 17 | 3  | --     | --      |
|            | Ca(ICC2/PI489777)SNP_16124 | 841  | C | T | 16 | 3  | --     | --      |
|            | Ca(ICC2/PI489777)SNP_16125 | 1164 | G | A | 9  | 4  | --     | --      |
|            | Ca(ICC2/PI489777)SNP_16126 | 1442 | T | C | 8  | 5  | --     | --      |
|            | Ca(ICC2/PI489777)SNP_16127 | 1532 | A | C | 4  | 4  | --     | --      |

|            |                            |      |   |   |     |    |        |      |
|------------|----------------------------|------|---|---|-----|----|--------|------|
| CakTC07746 | Ca(ICC2/PI489777)SNP_16128 | 320  | A | G | 12  | 3  | --     | --   |
|            | Ca(ICC2/PI489777)SNP_16129 | 366  | T | C | 12  | 3  | --     | --   |
|            | Ca(ICC2/PI489777)SNP_16130 | 407  | T | C | 11  | 4  | --     | --   |
|            | Ca(ICC2/PI489777)SNP_16131 | 521  | C | A | 10  | 3  | --     | --   |
| CakTC37227 | Ca(ICC2/PI489777)SNP_16132 | 860  | G | T | 13  | 10 | Flower | bud  |
| CakTC28333 | Ca(ICC2/PI489777)SNP_16133 | 1397 | C | T | 6   | 3  | --     | SBP  |
|            | Ca(ICC2/PI489777)SNP_16134 | 1587 | C | T | 6   | 5  | --     | SBP  |
| CakTC40131 | Ca(ICC2/PI489777)SNP_16135 | 510  | G | A | 10  | 3  | --     | --   |
| CakTC36622 | Ca(ICC2/PI489777)SNP_16136 | 149  | T | C | 12  | 4  | --     | --   |
|            | Ca(ICC2/PI489777)SNP_16137 | 165  | G | A | 7   | 4  | --     | --   |
|            | Ca(ICC2/PI489777)SNP_16138 | 549  | T | C | 8   | 3  | --     | --   |
|            | Ca(ICC2/PI489777)SNP_16139 | 576  | C | T | 7   | 4  | --     | --   |
|            | Ca(ICC2/PI489777)SNP_16140 | 745  | A | G | 8   | 8  | --     | --   |
|            | Ca(ICC2/PI489777)SNP_16141 | 1052 | G | A | 17  | 5  | --     | --   |
| CakTC37314 | Ca(ICC2/PI489777)SNP_16142 | 620  | A | G | 8   | 4  | --     | --   |
| CakTC40955 | Ca(ICC2/PI489777)SNP_16143 | 45   | G | T | 8   | 4  | --     | --   |
|            | Ca(ICC2/PI489777)SNP_16144 | 66   | G | T | 11  | 4  | --     | --   |
| CakTC40528 | Ca(ICC2/PI489777)SNP_16145 | 81   | C | A | 3   | 7  | --     | --   |
|            | Ca(ICC2/PI489777)SNP_16146 | 111  | C | A | 4   | 6  | --     | --   |
|            | Ca(ICC2/PI489777)SNP_16147 | 312  | T | A | 5   | 7  | --     | --   |
| CakTC30020 | Ca(ICC2/PI489777)SNP_16148 | 1170 | G | A | 6   | 3  | --     | --   |
|            | Ca(ICC2/PI489777)SNP_16149 | 1238 | C | T | 7   | 3  | --     | --   |
|            | Ca(ICC2/PI489777)SNP_16150 | 1442 | G | C | 7   | 3  | --     | --   |
|            | Ca(ICC2/PI489777)SNP_16151 | 2063 | T | C | 7   | 3  | --     | --   |
|            | Ca(ICC2/PI489777)SNP_16152 | 2254 | C | T | 4   | 3  | --     | --   |
|            | Ca(ICC2/PI489777)SNP_16153 | 3023 | T | A | 12  | 4  | --     | --   |
|            | Ca(ICC2/PI489777)SNP_16154 | 3150 | A | G | 8   | 6  | --     | --   |
|            | Ca(ICC2/PI489777)SNP_16155 | 3216 | T | C | 8   | 4  | --     | --   |
| CakTC30096 | Ca(ICC2/PI489777)SNP_16156 | 172  | C | A | 3   | 3  | Root   | --   |
|            | Ca(ICC2/PI489777)SNP_16157 | 176  | A | T | 3   | 3  | Root   | --   |
|            | Ca(ICC2/PI489777)SNP_16158 | 265  | G | C | 3   | 4  | Root   | --   |
| CakTC37300 | Ca(ICC2/PI489777)SNP_16159 | 558  | G | A | 8   | 5  | Flower | bud  |
| CakTC39076 | Ca(ICC2/PI489777)SNP_16160 | 385  | G | A | 22  | 10 | --     | --   |
|            | Ca(ICC2/PI489777)SNP_16161 | 725  | G | A | 10  | 6  | --     | --   |
| CakTC23831 | Ca(ICC2/PI489777)SNP_16162 | 742  | C | A | 6   | 7  | --     | --   |
|            | Ca(ICC2/PI489777)SNP_16163 | 858  | C | A | 10  | 7  | --     | --   |
|            | Ca(ICC2/PI489777)SNP_16164 | 962  | C | T | 7   | 3  | --     | --   |
|            | Ca(ICC2/PI489777)SNP_16165 | 1020 | T | A | 5   | 3  | --     | --   |
|            | Ca(ICC2/PI489777)SNP_16166 | 1468 | A | C | 7   | 3  | --     | --   |
|            | Ca(ICC2/PI489777)SNP_16167 | 3273 | T | A | 7   | 5  | --     | --   |
|            | Ca(ICC2/PI489777)SNP_16168 | 3384 | A | G | 3   | 5  | --     | --   |
|            | Ca(ICC2/PI489777)SNP_16169 | 4906 | C | T | 3   | 5  | --     | --   |
| CakTC39843 | Ca(ICC2/PI489777)SNP_16170 | 581  | C | T | 3   | 3  | --     | --   |
|            | Ca(ICC2/PI489777)SNP_16171 | 603  | C | T | 3   | 3  | --     | --   |
| CakTC30064 | Ca(ICC2/PI489777)SNP_16172 | 1339 | G | A | 4   | 4  | --     | --   |
|            | Ca(ICC2/PI489777)SNP_16173 | 1434 | C | T | 6   | 4  | --     | --   |
|            | Ca(ICC2/PI489777)SNP_16174 | 1517 | G | A | 7   | 3  | --     | --   |
| CakTC43361 | Ca(ICC2/PI489777)SNP_16175 | 368  | G | T | 21  | 34 | --     | --   |
|            | Ca(ICC2/PI489777)SNP_16176 | 378  | G | A | 28  | 37 | --     | --   |
|            | Ca(ICC2/PI489777)SNP_16177 | 1203 | A | T | 26  | 13 | --     | --   |
|            | Ca(ICC2/PI489777)SNP_16178 | 1656 | A | G | 26  | 13 | --     | --   |
| CakTC26015 | Ca(ICC2/PI489777)SNP_16179 | 1456 | T | C | 29  | 22 | --     | IWS1 |
|            | Ca(ICC2/PI489777)SNP_16180 | 1776 | C | A | 27  | 26 | --     | IWS1 |
|            | Ca(ICC2/PI489777)SNP_16181 | 3079 | T | C | 28  | 17 | --     | IWS1 |
|            | Ca(ICC2/PI489777)SNP_16182 | 3864 | C | T | 49  | 27 | --     | IWS1 |
|            | Ca(ICC2/PI489777)SNP_16183 | 4867 | C | T | 20  | 20 | --     | IWS1 |
| CakTC37777 | Ca(ICC2/PI489777)SNP_16184 | 401  | T | C | 13  | 9  | --     | bHLH |
|            | Ca(ICC2/PI489777)SNP_16185 | 451  | T | C | 15  | 8  | --     | bHLH |
|            | Ca(ICC2/PI489777)SNP_16186 | 607  | T | C | 15  | 9  | --     | bHLH |
|            | Ca(ICC2/PI489777)SNP_16187 | 1376 | G | A | 17  | 5  | --     | bHLH |
|            | Ca(ICC2/PI489777)SNP_16188 | 1494 | T | C | 12  | 5  | --     | bHLH |
| CakTC42238 | Ca(ICC2/PI489777)SNP_16189 | 121  | C | T | 4   | 4  | --     | --   |
|            | Ca(ICC2/PI489777)SNP_16190 | 1113 | A | G | 7   | 4  | --     | --   |
| CakTC01695 | Ca(ICC2/PI489777)SNP_16191 | 647  | G | A | 46  | 28 | --     | --   |
| CakTC28401 | Ca(ICC2/PI489777)SNP_16192 | 966  | T | G | 177 | 74 | --     | --   |
| CakTC41401 | Ca(ICC2/PI489777)SNP_16193 | 79   | T | C | 6   | 10 | --     | --   |
|            | Ca(ICC2/PI489777)SNP_16194 | 535  | G | C | 21  | 16 | --     | --   |
|            | Ca(ICC2/PI489777)SNP_16195 | 573  | T | G | 17  | 13 | --     | --   |
| CakTC39454 | Ca(ICC2/PI489777)SNP_16196 | 1358 | T | C | 3   | 4  | --     | --   |
| CakTC39767 | Ca(ICC2/PI489777)SNP_16197 | 268  | G | A | 25  | 16 | --     | --   |
|            | Ca(ICC2/PI489777)SNP_16198 | 881  | T | C | 13  | 22 | --     | --   |
| CakTC27251 | Ca(ICC2/PI489777)SNP_16199 | 273  | C | T | 9   | 7  | --     | --   |
|            | Ca(ICC2/PI489777)SNP_16200 | 312  | C | T | 7   | 7  | --     | --   |
|            | Ca(ICC2/PI489777)SNP_16201 | 646  | A | G | 10  | 6  | --     | --   |

|            |                            |      |   |   |    |     |           |    |
|------------|----------------------------|------|---|---|----|-----|-----------|----|
|            | Ca(ICC2/PI489777)SNP_16202 | 648  | G | A | 10 | 6   | --        | -- |
|            | Ca(ICC2/PI489777)SNP_16203 | 675  | T | C | 9  | 7   | --        | -- |
|            | Ca(ICC2/PI489777)SNP_16204 | 753  | G | A | 7  | 6   | --        | -- |
|            | Ca(ICC2/PI489777)SNP_16205 | 783  | T | A | 10 | 11  | --        | -- |
|            | Ca(ICC2/PI489777)SNP_16206 | 1466 | G | A | 21 | 4   | --        | -- |
|            | Ca(ICC2/PI489777)SNP_16207 | 1517 | T | C | 18 | 3   | --        | -- |
|            | Ca(ICC2/PI489777)SNP_16208 | 1656 | C | T | 14 | 8   | --        | -- |
|            | Ca(ICC2/PI489777)SNP_16209 | 2504 | T | C | 10 | 3   | --        | -- |
|            | Ca(ICC2/PI489777)SNP_16210 | 2962 | G | A | 6  | 3   | --        | -- |
|            | Ca(ICC2/PI489777)SNP_16211 | 3016 | A | T | 14 | 4   | --        | -- |
|            | Ca(ICC2/PI489777)SNP_16212 | 3251 | G | A | 6  | 9   | --        | -- |
|            | Ca(ICC2/PI489777)SNP_16213 | 3986 | C | A | 13 | 11  | --        | -- |
| CakTC34256 | Ca(ICC2/PI489777)SNP_16214 | 759  | C | A | 10 | 7   | --        | -- |
|            | Ca(ICC2/PI489777)SNP_16215 | 1466 | A | G | 9  | 9   | --        | -- |
|            | Ca(ICC2/PI489777)SNP_16216 | 2608 | C | A | 7  | 5   | --        | -- |
|            | Ca(ICC2/PI489777)SNP_16217 | 3571 | A | C | 12 | 16  | --        | -- |
|            | Ca(ICC2/PI489777)SNP_16218 | 4133 | C | G | 9  | 6   | --        | -- |
|            | Ca(ICC2/PI489777)SNP_16219 | 4343 | T | C | 21 | 6   | --        | -- |
|            | Ca(ICC2/PI489777)SNP_16220 | 5080 | C | A | 21 | 7   | --        | -- |
| CakTC42541 | Ca(ICC2/PI489777)SNP_16221 | 1389 | T | C | 10 | 7   | --        | -- |
|            | Ca(ICC2/PI489777)SNP_16222 | 1708 | G | A | 11 | 4   | --        | -- |
| CakTC37124 | Ca(ICC2/PI489777)SNP_16223 | 293  | G | T | 9  | 16  | --        | -- |
|            | Ca(ICC2/PI489777)SNP_16224 | 356  | G | T | 13 | 15  | --        | -- |
|            | Ca(ICC2/PI489777)SNP_16225 | 582  | T | C | 24 | 17  | --        | -- |
| CakTC24655 | Ca(ICC2/PI489777)SNP_16226 | 465  | G | A | 16 | 22  | --        | -- |
|            | Ca(ICC2/PI489777)SNP_16227 | 534  | C | T | 18 | 22  | --        | -- |
|            | Ca(ICC2/PI489777)SNP_16228 | 793  | C | G | 30 | 16  | --        | -- |
|            | Ca(ICC2/PI489777)SNP_16229 | 1007 | A | C | 21 | 12  | --        | -- |
|            | Ca(ICC2/PI489777)SNP_16230 | 1648 | G | A | 13 | 11  | --        | -- |
| CakTC18451 | Ca(ICC2/PI489777)SNP_16231 | 587  | T | C | 30 | 25  | --        | -- |
|            | Ca(ICC2/PI489777)SNP_16232 | 2013 | C | G | 7  | 16  | --        | -- |
|            | Ca(ICC2/PI489777)SNP_16233 | 2037 | A | C | 3  | 12  | --        | -- |
| CakTC40989 | Ca(ICC2/PI489777)SNP_16234 | 400  | T | G | 5  | 3   | --        | -- |
|            | Ca(ICC2/PI489777)SNP_16235 | 535  | T | C | 7  | 4   | --        | -- |
|            | Ca(ICC2/PI489777)SNP_16236 | 548  | G | A | 7  | 5   | --        | -- |
|            | Ca(ICC2/PI489777)SNP_16237 | 561  | A | G | 7  | 5   | --        | -- |
|            | Ca(ICC2/PI489777)SNP_16238 | 640  | G | A | 11 | 6   | --        | -- |
| CakTC40715 | Ca(ICC2/PI489777)SNP_16239 | 56   | T | A | 30 | 47  | --        | -- |
|            | Ca(ICC2/PI489777)SNP_16240 | 279  | G | A | 70 | 103 | --        | -- |
|            | Ca(ICC2/PI489777)SNP_16241 | 402  | A | T | 77 | 89  | --        | -- |
|            | Ca(ICC2/PI489777)SNP_16242 | 480  | A | G | 62 | 75  | --        | -- |
| CakTC26053 | Ca(ICC2/PI489777)SNP_16243 | 2047 | G | A | 5  | 16  | --        | -- |
|            | Ca(ICC2/PI489777)SNP_16244 | 2304 | G | C | 4  | 18  | --        | -- |
|            | Ca(ICC2/PI489777)SNP_16245 | 4836 | G | A | 6  | 4   | --        | -- |
| CakTC31058 | Ca(ICC2/PI489777)SNP_16246 | 430  | T | C | 18 | 11  | --        | -- |
|            | Ca(ICC2/PI489777)SNP_16247 | 433  | C | T | 24 | 11  | --        | -- |
|            | Ca(ICC2/PI489777)SNP_16248 | 655  | T | C | 22 | 12  | --        | -- |
| CakTC30708 | Ca(ICC2/PI489777)SNP_16249 | 814  | T | C | 18 | 5   | --        | -- |
|            | Ca(ICC2/PI489777)SNP_16250 | 1512 | T | C | 5  | 4   | --        | -- |
|            | Ca(ICC2/PI489777)SNP_16251 | 1720 | G | A | 3  | 3   | --        | -- |
|            | Ca(ICC2/PI489777)SNP_16252 | 1723 | C | G | 3  | 3   | --        | -- |
|            | Ca(ICC2/PI489777)SNP_16253 | 1746 | C | A | 3  | 3   | --        | -- |
| CakTC28703 | Ca(ICC2/PI489777)SNP_16254 | 1014 | A | T | 5  | 7   | Shoot     | -- |
|            | Ca(ICC2/PI489777)SNP_16255 | 1026 | G | A | 6  | 6   | Shoot     | -- |
| CakTC38066 | Ca(ICC2/PI489777)SNP_16256 | 1419 | C | A | 6  | 5   | --        | -- |
| CakTC24178 | Ca(ICC2/PI489777)SNP_16257 | 1139 | A | G | 7  | 5   | Young_pod | -- |
| CakTC10494 | Ca(ICC2/PI489777)SNP_16258 | 579  | A | G | 36 | 29  | --        | -- |
| CakTC30874 | Ca(ICC2/PI489777)SNP_16259 | 241  | C | G | 51 | 18  | --        | -- |
|            | Ca(ICC2/PI489777)SNP_16260 | 351  | T | C | 55 | 20  | --        | -- |
|            | Ca(ICC2/PI489777)SNP_16261 | 358  | C | G | 63 | 22  | --        | -- |
|            | Ca(ICC2/PI489777)SNP_16262 | 972  | C | T | 50 | 20  | --        | -- |
|            | Ca(ICC2/PI489777)SNP_16263 | 1014 | G | A | 41 | 22  | --        | -- |
| CakTC37172 | Ca(ICC2/PI489777)SNP_16264 | 92   | T | C | 27 | 14  | --        | -- |
| CakTC38313 | Ca(ICC2/PI489777)SNP_16265 | 188  | G | T | 21 | 5   | --        | -- |
|            | Ca(ICC2/PI489777)SNP_16266 | 266  | A | G | 21 | 5   | --        | -- |
|            | Ca(ICC2/PI489777)SNP_16267 | 326  | C | T | 23 | 6   | --        | -- |
|            | Ca(ICC2/PI489777)SNP_16268 | 327  | C | T | 23 | 6   | --        | -- |
|            | Ca(ICC2/PI489777)SNP_16269 | 392  | G | A | 24 | 6   | --        | -- |
|            | Ca(ICC2/PI489777)SNP_16270 | 452  | A | G | 22 | 3   | --        | -- |
|            | Ca(ICC2/PI489777)SNP_16271 | 464  | C | A | 23 | 4   | --        | -- |
|            | Ca(ICC2/PI489777)SNP_16272 | 487  | C | T | 23 | 4   | --        | -- |
|            | Ca(ICC2/PI489777)SNP_16273 | 494  | G | T | 22 | 3   | --        | -- |
| CakTC09663 | Ca(ICC2/PI489777)SNP_16274 | 1630 | A | T | 3  | 9   | --        | -- |
| CakTC36612 | Ca(ICC2/PI489777)SNP_16275 | 590  | T | G | 3  | 3   | --        | -- |

|            |                            |      |   |   |    |    |    |      |
|------------|----------------------------|------|---|---|----|----|----|------|
|            | Ca(ICC2/PI489777)SNP_16276 | 591  | C | A | 3  | 3  | -- | --   |
| CakTC37660 | Ca(ICC2/PI489777)SNP_16277 | 628  | G | A | 40 | 16 | -- | --   |
|            | Ca(ICC2/PI489777)SNP_16278 | 1354 | G | A | 49 | 16 | -- | --   |
|            | Ca(ICC2/PI489777)SNP_16279 | 1446 | A | G | 25 | 14 | -- | --   |
| CakTC41535 | Ca(ICC2/PI489777)SNP_16280 | 1162 | G | A | 5  | 3  | -- | bHLH |
|            | Ca(ICC2/PI489777)SNP_16281 | 1935 | T | C | 12 | 3  | -- | bHLH |
| CakTC39703 | Ca(ICC2/PI489777)SNP_16282 | 307  | T | C | 5  | 8  | -- | --   |
| CakTC32010 | Ca(ICC2/PI489777)SNP_16283 | 1019 | A | T | 27 | 7  | -- | --   |
|            | Ca(ICC2/PI489777)SNP_16284 | 1082 | T | C | 35 | 8  | -- | --   |
|            | Ca(ICC2/PI489777)SNP_16285 | 1694 | G | A | 22 | 5  | -- | --   |
|            | Ca(ICC2/PI489777)SNP_16286 | 2360 | C | T | 22 | 18 | -- | --   |
|            | Ca(ICC2/PI489777)SNP_16287 | 2405 | T | C | 22 | 17 | -- | --   |
|            | Ca(ICC2/PI489777)SNP_16288 | 2483 | T | A | 30 | 23 | -- | --   |
|            | Ca(ICC2/PI489777)SNP_16289 | 3059 | T | A | 15 | 8  | -- | --   |
|            | Ca(ICC2/PI489777)SNP_16290 | 3266 | T | A | 10 | 9  | -- | --   |
| CakTC41291 | Ca(ICC2/PI489777)SNP_16291 | 496  | G | A | 17 | 23 | -- | --   |
| CakTC36034 | Ca(ICC2/PI489777)SNP_16292 | 337  | G | C | 18 | 13 | -- | --   |
|            | Ca(ICC2/PI489777)SNP_16293 | 1833 | A | G | 14 | 18 | -- | --   |
|            | Ca(ICC2/PI489777)SNP_16294 | 1848 | T | C | 13 | 17 | -- | --   |
|            | Ca(ICC2/PI489777)SNP_16295 | 1890 | A | T | 11 | 16 | -- | --   |
|            | Ca(ICC2/PI489777)SNP_16296 | 1938 | C | T | 13 | 24 | -- | --   |
|            | Ca(ICC2/PI489777)SNP_16297 | 1971 | A | G | 15 | 16 | -- | --   |
|            | Ca(ICC2/PI489777)SNP_16298 | 1977 | T | C | 14 | 17 | -- | --   |
|            | Ca(ICC2/PI489777)SNP_16299 | 2139 | G | C | 13 | 20 | -- | --   |
|            | Ca(ICC2/PI489777)SNP_16300 | 2199 | G | A | 15 | 21 | -- | --   |
|            | Ca(ICC2/PI489777)SNP_16301 | 3112 | C | T | 12 | 14 | -- | --   |
| CakTC39328 | Ca(ICC2/PI489777)SNP_16302 | 827  | C | T | 49 | 17 | -- | --   |
| CakTC42749 | Ca(ICC2/PI489777)SNP_16303 | 324  | C | T | 3  | 4  | -- | --   |
|            | Ca(ICC2/PI489777)SNP_16304 | 375  | A | T | 4  | 4  | -- | --   |
|            | Ca(ICC2/PI489777)SNP_16305 | 388  | A | C | 6  | 4  | -- | --   |
|            | Ca(ICC2/PI489777)SNP_16306 | 553  | G | T | 8  | 3  | -- | --   |
|            | Ca(ICC2/PI489777)SNP_16307 | 598  | G | T | 8  | 3  | -- | --   |
|            | Ca(ICC2/PI489777)SNP_16308 | 828  | T | G | 4  | 7  | -- | --   |
|            | Ca(ICC2/PI489777)SNP_16309 | 1218 | G | T | 7  | 3  | -- | --   |
|            | Ca(ICC2/PI489777)SNP_16310 | 1242 | G | T | 7  | 5  | -- | --   |
|            | Ca(ICC2/PI489777)SNP_16311 | 1245 | A | G | 7  | 5  | -- | --   |
| CakTC24702 | Ca(ICC2/PI489777)SNP_16312 | 239  | A | C | 7  | 4  | -- | --   |
| CakTC39446 | Ca(ICC2/PI489777)SNP_16313 | 426  | C | T | 11 | 4  | -- | --   |
|            | Ca(ICC2/PI489777)SNP_16314 | 430  | C | G | 11 | 4  | -- | --   |
| CakTC31244 | Ca(ICC2/PI489777)SNP_16315 | 564  | C | T | 4  | 3  | -- | --   |
|            | Ca(ICC2/PI489777)SNP_16316 | 591  | G | A | 5  | 3  | -- | --   |
|            | Ca(ICC2/PI489777)SNP_16317 | 594  | T | G | 5  | 3  | -- | --   |
|            | Ca(ICC2/PI489777)SNP_16318 | 603  | G | A | 8  | 4  | -- | --   |
|            | Ca(ICC2/PI489777)SNP_16319 | 836  | T | C | 11 | 5  | -- | --   |
| CakTC27154 | Ca(ICC2/PI489777)SNP_16320 | 122  | C | G | 23 | 13 | -- | --   |
|            | Ca(ICC2/PI489777)SNP_16321 | 548  | T | C | 32 | 37 | -- | --   |
|            | Ca(ICC2/PI489777)SNP_16322 | 795  | C | T | 26 | 23 | -- | --   |
|            | Ca(ICC2/PI489777)SNP_16323 | 1069 | G | T | 18 | 20 | -- | --   |
|            | Ca(ICC2/PI489777)SNP_16324 | 1311 | T | C | 10 | 10 | -- | --   |
| CakTC31852 | Ca(ICC2/PI489777)SNP_16325 | 1105 | A | G | 3  | 3  | -- | --   |
| CakTC02614 | Ca(ICC2/PI489777)SNP_16326 | 462  | T | A | 5  | 9  | -- | --   |
|            | Ca(ICC2/PI489777)SNP_16327 | 2061 | C | T | 3  | 5  | -- | --   |
| CakTC34017 | Ca(ICC2/PI489777)SNP_16328 | 645  | A | T | 7  | 4  | -- | --   |
|            | Ca(ICC2/PI489777)SNP_16329 | 868  | A | C | 8  | 9  | -- | --   |
|            | Ca(ICC2/PI489777)SNP_16330 | 1050 | T | C | 21 | 13 | -- | --   |
|            | Ca(ICC2/PI489777)SNP_16331 | 1259 | G | C | 21 | 11 | -- | --   |
|            | Ca(ICC2/PI489777)SNP_16332 | 1277 | T | C | 23 | 11 | -- | --   |
|            | Ca(ICC2/PI489777)SNP_16333 | 1332 | C | G | 18 | 7  | -- | --   |
| CakTC24426 | Ca(ICC2/PI489777)SNP_16334 | 989  | C | T | 18 | 24 | -- | --   |
| CakTC28512 | Ca(ICC2/PI489777)SNP_16335 | 416  | T | C | 43 | 17 | -- | --   |
|            | Ca(ICC2/PI489777)SNP_16336 | 816  | A | G | 41 | 24 | -- | --   |
|            | Ca(ICC2/PI489777)SNP_16337 | 845  | C | G | 39 | 19 | -- | --   |
|            | Ca(ICC2/PI489777)SNP_16338 | 851  | T | G | 23 | 16 | -- | --   |
| CakTC39123 | Ca(ICC2/PI489777)SNP_16339 | 259  | C | T | 15 | 5  | -- | --   |
|            | Ca(ICC2/PI489777)SNP_16340 | 448  | C | G | 30 | 6  | -- | --   |
|            | Ca(ICC2/PI489777)SNP_16341 | 661  | G | C | 21 | 3  | -- | --   |
|            | Ca(ICC2/PI489777)SNP_16342 | 1078 | C | T | 12 | 9  | -- | --   |
|            | Ca(ICC2/PI489777)SNP_16343 | 1084 | T | C | 8  | 11 | -- | --   |
|            | Ca(ICC2/PI489777)SNP_16344 | 1099 | C | T | 11 | 13 | -- | --   |
|            | Ca(ICC2/PI489777)SNP_16345 | 1234 | T | A | 11 | 11 | -- | --   |
| CakTC27236 | Ca(ICC2/PI489777)SNP_16346 | 344  | A | G | 31 | 11 | -- | --   |
|            | Ca(ICC2/PI489777)SNP_16347 | 1259 | A | G | 30 | 19 | -- | --   |
| CakTC31696 | Ca(ICC2/PI489777)SNP_16348 | 151  | A | G | 6  | 3  | -- | --   |
|            | Ca(ICC2/PI489777)SNP_16349 | 191  | A | G | 31 | 18 | -- | --   |

|            |                            |      |   |   |     |     |    |              |
|------------|----------------------------|------|---|---|-----|-----|----|--------------|
|            | Ca(ICC2/PI489777)SNP_16350 | 304  | T | C | 44  | 20  | -- | --           |
|            | Ca(ICC2/PI489777)SNP_16351 | 357  | C | G | 50  | 23  | -- | --           |
|            | Ca(ICC2/PI489777)SNP_16352 | 397  | C | T | 46  | 24  | -- | --           |
|            | Ca(ICC2/PI489777)SNP_16353 | 456  | A | G | 43  | 28  | -- | --           |
|            | Ca(ICC2/PI489777)SNP_16354 | 457  | A | G | 43  | 28  | -- | --           |
|            | Ca(ICC2/PI489777)SNP_16355 | 797  | T | C | 46  | 18  | -- | --           |
|            | Ca(ICC2/PI489777)SNP_16356 | 817  | C | T | 45  | 16  | -- | --           |
|            | Ca(ICC2/PI489777)SNP_16357 | 916  | G | C | 49  | 11  | -- | --           |
|            | Ca(ICC2/PI489777)SNP_16358 | 1045 | C | G | 30  | 9   | -- | --           |
|            | Ca(ICC2/PI489777)SNP_16359 | 1275 | A | G | 12  | 4   | -- | --           |
| CakTC37232 | Ca(ICC2/PI489777)SNP_16360 | 160  | C | T | 3   | 3   | -- | --           |
| CakTC13107 | Ca(ICC2/PI489777)SNP_16361 | 352  | T | G | 10  | 5   | -- | --           |
|            | Ca(ICC2/PI489777)SNP_16362 | 511  | G | A | 11  | 5   | -- | --           |
| CakTC11096 | Ca(ICC2/PI489777)SNP_16363 | 419  | G | A | 5   | 4   | -- | --           |
|            | Ca(ICC2/PI489777)SNP_16364 | 1113 | T | C | 5   | 4   | -- | --           |
| CakTC31768 | Ca(ICC2/PI489777)SNP_16365 | 1409 | C | T | 7   | 5   | -- | --           |
|            | Ca(ICC2/PI489777)SNP_16366 | 1699 | G | A | 13  | 5   | -- | --           |
|            | Ca(ICC2/PI489777)SNP_16367 | 1715 | A | G | 11  | 6   | -- | --           |
|            | Ca(ICC2/PI489777)SNP_16368 | 1820 | A | G | 9   | 5   | -- | --           |
| CakTC28078 | Ca(ICC2/PI489777)SNP_16369 | 251  | C | T | 3   | 3   | -- | --           |
|            | Ca(ICC2/PI489777)SNP_16370 | 337  | C | T | 5   | 4   | -- | --           |
|            | Ca(ICC2/PI489777)SNP_16371 | 928  | C | T | 14  | 4   | -- | --           |
| CakTC43081 | Ca(ICC2/PI489777)SNP_16372 | 459  | G | A | 132 | 156 | -- | --           |
|            | Ca(ICC2/PI489777)SNP_16373 | 471  | G | C | 123 | 126 | -- | --           |
|            | Ca(ICC2/PI489777)SNP_16374 | 501  | C | T | 142 | 178 | -- | --           |
|            | Ca(ICC2/PI489777)SNP_16375 | 740  | T | C | 117 | 65  | -- | --           |
|            | Ca(ICC2/PI489777)SNP_16376 | 810  | C | G | 85  | 17  | -- | --           |
| CakTC30460 | Ca(ICC2/PI489777)SNP_16377 | 662  | A | G | 253 | 181 | -- | --           |
|            | Ca(ICC2/PI489777)SNP_16378 | 1535 | T | G | 212 | 189 | -- | --           |
|            | Ca(ICC2/PI489777)SNP_16379 | 1838 | C | T | 214 | 165 | -- | --           |
|            | Ca(ICC2/PI489777)SNP_16380 | 1910 | A | G | 176 | 154 | -- | --           |
|            | Ca(ICC2/PI489777)SNP_16381 | 2418 | T | A | 87  | 65  | -- | --           |
| CakTC43066 | Ca(ICC2/PI489777)SNP_16382 | 608  | C | T | 6   | 5   | -- | --           |
|            | Ca(ICC2/PI489777)SNP_16383 | 829  | T | C | 8   | 5   | -- | --           |
| CakTC30236 | Ca(ICC2/PI489777)SNP_16384 | 56   | C | G | 3   | 4   | -- | --           |
| CakTC22616 | Ca(ICC2/PI489777)SNP_16385 | 118  | C | A | 21  | 4   | -- | --           |
|            | Ca(ICC2/PI489777)SNP_16386 | 372  | A | G | 20  | 3   | -- | --           |
|            | Ca(ICC2/PI489777)SNP_16387 | 411  | T | C | 20  | 5   | -- | --           |
|            | Ca(ICC2/PI489777)SNP_16388 | 882  | T | C | 86  | 46  | -- | --           |
|            | Ca(ICC2/PI489777)SNP_16389 | 1575 | C | T | 51  | 25  | -- | --           |
| CakTC27554 | Ca(ICC2/PI489777)SNP_16390 | 366  | G | T | 3   | 5   | -- | --           |
|            | Ca(ICC2/PI489777)SNP_16391 | 588  | C | G | 3   | 5   | -- | --           |
| CakTC41075 | Ca(ICC2/PI489777)SNP_16392 | 1192 | T | C | 8   | 10  | -- | --           |
|            | Ca(ICC2/PI489777)SNP_16393 | 1810 | T | C | 12  | 9   | -- | --           |
|            | Ca(ICC2/PI489777)SNP_16394 | 1886 | C | T | 12  | 8   | -- | --           |
|            | Ca(ICC2/PI489777)SNP_16395 | 1963 | T | G | 14  | 7   | -- | --           |
|            | Ca(ICC2/PI489777)SNP_16396 | 2318 | C | T | 14  | 9   | -- | --           |
|            | Ca(ICC2/PI489777)SNP_16397 | 2336 | G | A | 9   | 8   | -- | --           |
|            | Ca(ICC2/PI489777)SNP_16398 | 2392 | C | G | 10  | 6   | -- | --           |
| CakTC25699 | Ca(ICC2/PI489777)SNP_16399 | 343  | G | A | 9   | 9   | -- | Pseudo_ARR-B |
|            | Ca(ICC2/PI489777)SNP_16400 | 798  | A | T | 8   | 8   | -- | Pseudo_ARR-B |
|            | Ca(ICC2/PI489777)SNP_16401 | 801  | C | T | 8   | 8   | -- | Pseudo_ARR-B |
|            | Ca(ICC2/PI489777)SNP_16402 | 2277 | T | A | 40  | 13  | -- | Pseudo_ARR-B |
| CakTC39334 | Ca(ICC2/PI489777)SNP_16403 | 557  | A | T | 3   | 4   | -- | --           |
|            | Ca(ICC2/PI489777)SNP_16404 | 560  | T | C | 3   | 4   | -- | --           |
|            | Ca(ICC2/PI489777)SNP_16405 | 771  | A | C | 4   | 6   | -- | --           |
|            | Ca(ICC2/PI489777)SNP_16406 | 827  | T | C | 3   | 7   | -- | --           |
|            | Ca(ICC2/PI489777)SNP_16407 | 860  | C | G | 3   | 6   | -- | --           |
|            | Ca(ICC2/PI489777)SNP_16408 | 872  | T | G | 3   | 6   | -- | --           |
|            | Ca(ICC2/PI489777)SNP_16409 | 956  | T | A | 5   | 8   | -- | --           |
| CakTC41215 | Ca(ICC2/PI489777)SNP_16410 | 1732 | G | A | 12  | 7   | -- | --           |
|            | Ca(ICC2/PI489777)SNP_16411 | 1810 | A | C | 9   | 5   | -- | --           |
| CakTC28552 | Ca(ICC2/PI489777)SNP_16412 | 210  | G | C | 24  | 9   | -- | --           |
|            | Ca(ICC2/PI489777)SNP_16413 | 347  | G | A | 20  | 6   | -- | --           |
|            | Ca(ICC2/PI489777)SNP_16414 | 434  | A | G | 16  | 8   | -- | --           |
|            | Ca(ICC2/PI489777)SNP_16415 | 540  | G | C | 22  | 7   | -- | --           |
|            | Ca(ICC2/PI489777)SNP_16416 | 761  | C | T | 26  | 4   | -- | --           |
|            | Ca(ICC2/PI489777)SNP_16417 | 811  | G | C | 20  | 3   | -- | --           |
| CakTC34105 | Ca(ICC2/PI489777)SNP_16418 | 375  | A | G | 31  | 21  | -- | --           |
|            | Ca(ICC2/PI489777)SNP_16419 | 476  | G | A | 33  | 26  | -- | --           |
|            | Ca(ICC2/PI489777)SNP_16420 | 1928 | G | A | 24  | 26  | -- | --           |
| CakTC43269 | Ca(ICC2/PI489777)SNP_16421 | 530  | T | G | 4   | 3   | -- | PLATZ        |
|            | Ca(ICC2/PI489777)SNP_16422 | 605  | A | G | 3   | 4   | -- | PLATZ        |
| CakTC40412 | Ca(ICC2/PI489777)SNP_16423 | 96   | T | C | 4   | 3   | -- | --           |

|            |                             |      |   |   |     |    |    |    |
|------------|-----------------------------|------|---|---|-----|----|----|----|
|            | Ca(ICCV2/PI489777)SNP_16424 | 102  | T | C | 4   | 3  | -- | -- |
|            | Ca(ICCV2/PI489777)SNP_16425 | 119  | A | T | 4   | 3  | -- | -- |
|            | Ca(ICCV2/PI489777)SNP_16426 | 140  | C | T | 6   | 3  | -- | -- |
|            | Ca(ICCV2/PI489777)SNP_16427 | 195  | C | T | 3   | 3  | -- | -- |
|            | Ca(ICCV2/PI489777)SNP_16428 | 211  | G | A | 8   | 3  | -- | -- |
| CakTC27267 | Ca(ICCV2/PI489777)SNP_16429 | 600  | A | G | 248 | 58 | -- | -- |
|            | Ca(ICCV2/PI489777)SNP_16430 | 628  | G | A | 253 | 55 | -- | -- |
|            | Ca(ICCV2/PI489777)SNP_16431 | 1095 | T | C | 176 | 63 | -- | -- |
|            | Ca(ICCV2/PI489777)SNP_16432 | 1271 | G | A | 102 | 21 | -- | -- |
| CakTC22946 | Ca(ICCV2/PI489777)SNP_16433 | 349  | T | C | 14  | 19 | -- | -- |
|            | Ca(ICCV2/PI489777)SNP_16434 | 733  | G | A | 23  | 19 | -- | -- |
| CakTC38082 | Ca(ICCV2/PI489777)SNP_16435 | 943  | C | T | 4   | 3  | -- | -- |
|            | Ca(ICCV2/PI489777)SNP_16436 | 1045 | A | G | 5   | 3  | -- | -- |
|            | Ca(ICCV2/PI489777)SNP_16437 | 1064 | T | C | 5   | 5  | -- | -- |
|            | Ca(ICCV2/PI489777)SNP_16438 | 1110 | G | A | 3   | 6  | -- | -- |
|            | Ca(ICCV2/PI489777)SNP_16439 | 1118 | A | T | 4   | 6  | -- | -- |
| CakTC32958 | Ca(ICCV2/PI489777)SNP_16440 | 132  | G | A | 4   | 8  | -- | -- |
|            | Ca(ICCV2/PI489777)SNP_16441 | 279  | A | T | 9   | 10 | -- | -- |
|            | Ca(ICCV2/PI489777)SNP_16442 | 370  | A | C | 9   | 10 | -- | -- |
|            | Ca(ICCV2/PI489777)SNP_16443 | 874  | T | C | 12  | 18 | -- | -- |
|            | Ca(ICCV2/PI489777)SNP_16444 | 1484 | A | T | 15  | 12 | -- | -- |
|            | Ca(ICCV2/PI489777)SNP_16445 | 1612 | A | G | 15  | 10 | -- | -- |
| CakTC18118 | Ca(ICCV2/PI489777)SNP_16446 | 282  | A | G | 3   | 3  | -- | -- |
| CakTC38919 | Ca(ICCV2/PI489777)SNP_16447 | 618  | G | A | 23  | 18 | -- | -- |
|            | Ca(ICCV2/PI489777)SNP_16448 | 1134 | C | T | 44  | 20 | -- | -- |
|            | Ca(ICCV2/PI489777)SNP_16449 | 1283 | T | G | 28  | 21 | -- | -- |
|            | Ca(ICCV2/PI489777)SNP_16450 | 1402 | A | G | 8   | 3  | -- | -- |
| CakTC41059 | Ca(ICCV2/PI489777)SNP_16451 | 195  | G | A | 40  | 64 | -- | -- |
|            | Ca(ICCV2/PI489777)SNP_16452 | 306  | T | C | 53  | 68 | -- | -- |
| CakTC40771 | Ca(ICCV2/PI489777)SNP_16453 | 642  | C | T | 6   | 4  | -- | -- |
| CakTC41170 | Ca(ICCV2/PI489777)SNP_16454 | 224  | A | G | 29  | 9  | -- | -- |
|            | Ca(ICCV2/PI489777)SNP_16455 | 330  | T | C | 30  | 10 | -- | -- |
|            | Ca(ICCV2/PI489777)SNP_16456 | 356  | T | A | 35  | 8  | -- | -- |
|            | Ca(ICCV2/PI489777)SNP_16457 | 360  | C | A | 38  | 7  | -- | -- |
|            | Ca(ICCV2/PI489777)SNP_16458 | 391  | C | A | 39  | 13 | -- | -- |
|            | Ca(ICCV2/PI489777)SNP_16459 | 1036 | G | A | 14  | 8  | -- | -- |
|            | Ca(ICCV2/PI489777)SNP_16460 | 1234 | G | C | 34  | 12 | -- | -- |
|            | Ca(ICCV2/PI489777)SNP_16461 | 1343 | C | A | 60  | 19 | -- | -- |
|            | Ca(ICCV2/PI489777)SNP_16462 | 1875 | G | A | 17  | 12 | -- | -- |
|            | Ca(ICCV2/PI489777)SNP_16463 | 1913 | T | G | 6   | 6  | -- | -- |
|            | Ca(ICCV2/PI489777)SNP_16464 | 1946 | G | T | 7   | 4  | -- | -- |
|            | Ca(ICCV2/PI489777)SNP_16465 | 2133 | C | G | 3   | 3  | -- | -- |
| CakTC26039 | Ca(ICCV2/PI489777)SNP_16466 | 472  | G | A | 4   | 3  | -- | -- |
|            | Ca(ICCV2/PI489777)SNP_16467 | 1405 | A | G | 8   | 3  | -- | -- |
| CakTC12630 | Ca(ICCV2/PI489777)SNP_16468 | 405  | T | C | 22  | 7  | -- | -- |
| CakTC32860 | Ca(ICCV2/PI489777)SNP_16469 | 262  | C | T | 4   | 8  | -- | -- |
|            | Ca(ICCV2/PI489777)SNP_16470 | 391  | T | C | 4   | 8  | -- | -- |
| CakTC33880 | Ca(ICCV2/PI489777)SNP_16471 | 928  | A | G | 7   | 5  | -- | -- |
| CakTC42164 | Ca(ICCV2/PI489777)SNP_16472 | 783  | C | A | 3   | 10 | -- | -- |
|            | Ca(ICCV2/PI489777)SNP_16473 | 972  | C | T | 9   | 11 | -- | -- |
|            | Ca(ICCV2/PI489777)SNP_16474 | 1647 | T | A | 3   | 7  | -- | -- |
| CakTC43274 | Ca(ICCV2/PI489777)SNP_16475 | 188  | C | G | 26  | 39 | -- | -- |
|            | Ca(ICCV2/PI489777)SNP_16476 | 197  | C | G | 23  | 39 | -- | -- |
|            | Ca(ICCV2/PI489777)SNP_16477 | 395  | A | C | 23  | 58 | -- | -- |
|            | Ca(ICCV2/PI489777)SNP_16478 | 611  | T | A | 14  | 31 | -- | -- |
|            | Ca(ICCV2/PI489777)SNP_16479 | 683  | T | G | 16  | 14 | -- | -- |
|            | Ca(ICCV2/PI489777)SNP_16480 | 1188 | G | A | 10  | 22 | -- | -- |
|            | Ca(ICCV2/PI489777)SNP_16481 | 1565 | A | G | 5   | 14 | -- | -- |
| CakTC38201 | Ca(ICCV2/PI489777)SNP_16482 | 211  | G | T | 3   | 17 | -- | -- |
|            | Ca(ICCV2/PI489777)SNP_16483 | 414  | T | C | 10  | 18 | -- | -- |
|            | Ca(ICCV2/PI489777)SNP_16484 | 423  | C | T | 10  | 18 | -- | -- |
|            | Ca(ICCV2/PI489777)SNP_16485 | 438  | C | T | 11  | 17 | -- | -- |
|            | Ca(ICCV2/PI489777)SNP_16486 | 594  | A | C | 17  | 6  | -- | -- |
|            | Ca(ICCV2/PI489777)SNP_16487 | 602  | G | C | 17  | 5  | -- | -- |
|            | Ca(ICCV2/PI489777)SNP_16488 | 744  | C | T | 10  | 5  | -- | -- |
|            | Ca(ICCV2/PI489777)SNP_16489 | 753  | C | T | 9   | 5  | -- | -- |
|            | Ca(ICCV2/PI489777)SNP_16490 | 771  | T | C | 7   | 5  | -- | -- |
|            | Ca(ICCV2/PI489777)SNP_16491 | 819  | T | C | 8   | 5  | -- | -- |
|            | Ca(ICCV2/PI489777)SNP_16492 | 1101 | A | G | 7   | 4  | -- | -- |
|            | Ca(ICCV2/PI489777)SNP_16493 | 1332 | A | T | 8   | 3  | -- | -- |
| CakTC38897 | Ca(ICCV2/PI489777)SNP_16494 | 1058 | T | G | 37  | 6  | -- | -- |
| CakTC24996 | Ca(ICCV2/PI489777)SNP_16495 | 530  | A | C | 7   | 9  | -- | -- |
|            | Ca(ICCV2/PI489777)SNP_16496 | 1037 | A | G | 7   | 6  | -- | -- |
| CakTC40728 | Ca(ICCV2/PI489777)SNP_16497 | 984  | C | T | 21  | 9  | -- | -- |

|            |                            |      |   |   |     |    |        |      |
|------------|----------------------------|------|---|---|-----|----|--------|------|
|            | Ca(ICC2/PI489777)SNP_16498 | 1164 | G | C | 14  | 6  | --     | --   |
|            | Ca(ICC2/PI489777)SNP_16499 | 1357 | T | C | 15  | 7  | --     | --   |
|            | Ca(ICC2/PI489777)SNP_16500 | 1449 | G | A | 13  | 4  | --     | --   |
| CakTC06186 | Ca(ICC2/PI489777)SNP_16501 | 1101 | C | T | 87  | 26 | --     | --   |
|            | Ca(ICC2/PI489777)SNP_16502 | 1173 | G | A | 79  | 24 | --     | --   |
| CakTC23349 | Ca(ICC2/PI489777)SNP_16503 | 503  | A | G | 4   | 4  | Root   | --   |
|            | Ca(ICC2/PI489777)SNP_16504 | 729  | T | C | 5   | 4  | Root   | --   |
|            | Ca(ICC2/PI489777)SNP_16505 | 968  | G | C | 3   | 3  | Root   | --   |
|            | Ca(ICC2/PI489777)SNP_16506 | 1303 | C | T | 5   | 4  | Root   | --   |
| CakTC42388 | Ca(ICC2/PI489777)SNP_16507 | 400  | T | C | 44  | 23 | --     | --   |
|            | Ca(ICC2/PI489777)SNP_16508 | 552  | G | A | 18  | 21 | --     | --   |
|            | Ca(ICC2/PI489777)SNP_16509 | 645  | C | T | 5   | 12 | --     | --   |
| CakTC27293 | Ca(ICC2/PI489777)SNP_16510 | 278  | G | T | 9   | 4  | --     | --   |
|            | Ca(ICC2/PI489777)SNP_16511 | 590  | T | C | 10  | 9  | --     | --   |
|            | Ca(ICC2/PI489777)SNP_16512 | 1055 | G | C | 13  | 7  | --     | --   |
| CakTC23999 | Ca(ICC2/PI489777)SNP_16513 | 77   | C | T | 8   | 8  | --     | --   |
|            | Ca(ICC2/PI489777)SNP_16514 | 690  | G | A | 12  | 4  | --     | --   |
|            | Ca(ICC2/PI489777)SNP_16515 | 1347 | T | C | 13  | 11 | --     | --   |
|            | Ca(ICC2/PI489777)SNP_16516 | 1435 | C | G | 5   | 3  | --     | --   |
| CakTC35586 | Ca(ICC2/PI489777)SNP_16517 | 51   | C | G | 3   | 4  | --     | --   |
|            | Ca(ICC2/PI489777)SNP_16518 | 449  | T | C | 4   | 5  | --     | --   |
|            | Ca(ICC2/PI489777)SNP_16519 | 2833 | G | A | 12  | 6  | --     | --   |
|            | Ca(ICC2/PI489777)SNP_16520 | 3098 | G | C | 5   | 4  | --     | --   |
| CakTC41279 | Ca(ICC2/PI489777)SNP_16521 | 545  | C | T | 8   | 6  | --     | --   |
|            | Ca(ICC2/PI489777)SNP_16522 | 818  | T | C | 8   | 3  | --     | --   |
|            | Ca(ICC2/PI489777)SNP_16523 | 911  | C | T | 9   | 3  | --     | --   |
|            | Ca(ICC2/PI489777)SNP_16524 | 1662 | C | T | 10  | 10 | --     | --   |
|            | Ca(ICC2/PI489777)SNP_16525 | 2094 | A | G | 11  | 5  | --     | --   |
| CakTC27386 | Ca(ICC2/PI489777)SNP_16526 | 127  | C | G | 7   | 3  | --     | --   |
|            | Ca(ICC2/PI489777)SNP_16527 | 646  | C | T | 16  | 15 | --     | --   |
|            | Ca(ICC2/PI489777)SNP_16528 | 1017 | A | C | 11  | 11 | --     | --   |
| CakTC39185 | Ca(ICC2/PI489777)SNP_16529 | 191  | A | G | 7   | 4  | --     | --   |
|            | Ca(ICC2/PI489777)SNP_16530 | 219  | A | G | 8   | 4  | --     | --   |
|            | Ca(ICC2/PI489777)SNP_16531 | 567  | T | A | 16  | 8  | --     | --   |
|            | Ca(ICC2/PI489777)SNP_16532 | 1272 | C | T | 17  | 3  | --     | --   |
|            | Ca(ICC2/PI489777)SNP_16533 | 1464 | G | T | 17  | 3  | --     | --   |
| CakTC10160 | Ca(ICC2/PI489777)SNP_16534 | 574  | A | T | 77  | 56 | --     | --   |
|            | Ca(ICC2/PI489777)SNP_16535 | 698  | T | A | 41  | 23 | --     | --   |
|            | Ca(ICC2/PI489777)SNP_16536 | 702  | T | C | 33  | 23 | --     | --   |
|            | Ca(ICC2/PI489777)SNP_16537 | 805  | C | A | 21  | 14 | --     | --   |
|            | Ca(ICC2/PI489777)SNP_16538 | 867  | C | T | 7   | 6  | --     | --   |
| CakTC10962 | Ca(ICC2/PI489777)SNP_16539 | 276  | A | G | 3   | 3  | --     | --   |
|            | Ca(ICC2/PI489777)SNP_16540 | 283  | C | T | 4   | 3  | --     | --   |
|            | Ca(ICC2/PI489777)SNP_16541 | 488  | G | A | 4   | 3  | --     | --   |
| CakTC29958 | Ca(ICC2/PI489777)SNP_16542 | 2178 | G | T | 5   | 3  | --     | SNF2 |
| CakTC42947 | Ca(ICC2/PI489777)SNP_16543 | 263  | T | A | 13  | 8  | --     | --   |
|            | Ca(ICC2/PI489777)SNP_16544 | 282  | C | T | 18  | 10 | --     | --   |
|            | Ca(ICC2/PI489777)SNP_16545 | 725  | A | G | 15  | 22 | --     | --   |
|            | Ca(ICC2/PI489777)SNP_16546 | 793  | C | A | 4   | 7  | --     | --   |
| CakTC37632 | Ca(ICC2/PI489777)SNP_16547 | 114  | C | T | 35  | 64 | --     | --   |
|            | Ca(ICC2/PI489777)SNP_16548 | 493  | C | G | 49  | 84 | --     | --   |
|            | Ca(ICC2/PI489777)SNP_16549 | 503  | G | A | 46  | 70 | --     | --   |
|            | Ca(ICC2/PI489777)SNP_16550 | 642  | T | C | 36  | 65 | --     | --   |
| CakTC38499 | Ca(ICC2/PI489777)SNP_16551 | 513  | C | T | 36  | 18 | --     | --   |
|            | Ca(ICC2/PI489777)SNP_16552 | 856  | T | G | 50  | 25 | --     | --   |
|            | Ca(ICC2/PI489777)SNP_16553 | 925  | T | G | 46  | 19 | --     | --   |
| CakTC32021 | Ca(ICC2/PI489777)SNP_16554 | 1434 | G | A | 10  | 11 | --     | --   |
| CakTC23329 | Ca(ICC2/PI489777)SNP_16555 | 245  | C | G | 5   | 3  | --     | --   |
|            | Ca(ICC2/PI489777)SNP_16556 | 250  | T | G | 5   | 3  | --     | --   |
|            | Ca(ICC2/PI489777)SNP_16557 | 327  | T | G | 4   | 3  | --     | --   |
|            | Ca(ICC2/PI489777)SNP_16558 | 666  | C | A | 14  | 3  | --     | --   |
|            | Ca(ICC2/PI489777)SNP_16559 | 1030 | G | C | 119 | 35 | --     | --   |
|            | Ca(ICC2/PI489777)SNP_16560 | 1126 | A | T | 171 | 63 | --     | --   |
|            | Ca(ICC2/PI489777)SNP_16561 | 1234 | G | A | 170 | 65 | --     | --   |
|            | Ca(ICC2/PI489777)SNP_16562 | 1410 | T | C | 112 | 45 | --     | --   |
|            | Ca(ICC2/PI489777)SNP_16563 | 1498 | T | G | 83  | 26 | --     | --   |
| CakTC28944 | Ca(ICC2/PI489777)SNP_16564 | 709  | T | C | 3   | 3  | --     | --   |
| CakTC08407 | Ca(ICC2/PI489777)SNP_16565 | 390  | C | A | 3   | 3  | --     | --   |
| CakTC43073 | Ca(ICC2/PI489777)SNP_16566 | 741  | G | A | 31  | 11 | --     | --   |
| CakTC37637 | Ca(ICC2/PI489777)SNP_16567 | 193  | C | T | 12  | 11 | --     | --   |
|            | Ca(ICC2/PI489777)SNP_16568 | 271  | C | T | 10  | 10 | --     | --   |
| CakTC41727 | Ca(ICC2/PI489777)SNP_16569 | 3336 | T | C | 7   | 4  | Flower | bud  |
| CakTC04003 | Ca(ICC2/PI489777)SNP_16570 | 279  | C | T | 5   | 4  | --     | --   |
|            | Ca(ICC2/PI489777)SNP_16571 | 596  | A | G | 5   | 3  | --     | --   |



|            |                            |      |   |   |    |    |        |     |
|------------|----------------------------|------|---|---|----|----|--------|-----|
| CakTC25675 | Ca(ICC2/PI489777)SNP_16572 | 1356 | T | A | 14 | 7  | --     | --  |
| CakTC38583 | Ca(ICC2/PI489777)SNP_16573 | 839  | T | A | 59 | 22 | --     | --  |
|            | Ca(ICC2/PI489777)SNP_16574 | 926  | C | G | 51 | 16 | --     | --  |
| CakTC38685 | Ca(ICC2/PI489777)SNP_16575 | 136  | C | G | 7  | 3  | --     | --  |
|            | Ca(ICC2/PI489777)SNP_16576 | 310  | C | T | 9  | 3  | --     | --  |
| CakTC25060 | Ca(ICC2/PI489777)SNP_16577 | 4324 | T | A | 3  | 7  | --     | --  |
|            | Ca(ICC2/PI489777)SNP_16578 | 4924 | C | G | 5  | 6  | --     | --  |
| CakTC09311 | Ca(ICC2/PI489777)SNP_16579 | 89   | G | A | 5  | 4  | --     | --  |
| CakTC35173 | Ca(ICC2/PI489777)SNP_16580 | 84   | G | T | 10 | 6  | --     | --  |
|            | Ca(ICC2/PI489777)SNP_16581 | 1149 | T | C | 57 | 52 | --     | --  |
|            | Ca(ICC2/PI489777)SNP_16582 | 2376 | A | G | 39 | 28 | --     | --  |
|            | Ca(ICC2/PI489777)SNP_16583 | 2562 | T | A | 36 | 27 | --     | --  |
|            | Ca(ICC2/PI489777)SNP_16584 | 3229 | G | A | 38 | 31 | --     | --  |
| CakTC05734 | Ca(ICC2/PI489777)SNP_16585 | 106  | A | G | 6  | 3  | --     | --  |
| CakTC40880 | Ca(ICC2/PI489777)SNP_16586 | 1807 | G | A | 17 | 11 | --     | --  |
| CakTC16978 | Ca(ICC2/PI489777)SNP_16587 | 51   | C | T | 3  | 3  | --     | --  |
|            | Ca(ICC2/PI489777)SNP_16588 | 59   | G | C | 3  | 4  | --     | --  |
|            | Ca(ICC2/PI489777)SNP_16589 | 301  | A | C | 3  | 5  | --     | --  |
| CakTC32885 | Ca(ICC2/PI489777)SNP_16590 | 66   | T | C | 5  | 10 | --     | --  |
|            | Ca(ICC2/PI489777)SNP_16591 | 68   | G | A | 5  | 10 | --     | --  |
| CakTC36232 | Ca(ICC2/PI489777)SNP_16592 | 367  | G | A | 11 | 9  | --     | --  |
|            | Ca(ICC2/PI489777)SNP_16593 | 540  | C | T | 14 | 4  | --     | --  |
|            | Ca(ICC2/PI489777)SNP_16594 | 794  | G | A | 10 | 10 | --     | --  |
|            | Ca(ICC2/PI489777)SNP_16595 | 1235 | T | C | 21 | 10 | --     | --  |
|            | Ca(ICC2/PI489777)SNP_16596 | 1697 | A | G | 15 | 17 | --     | --  |
| CakTC33358 | Ca(ICC2/PI489777)SNP_16597 | 247  | T | A | 23 | 8  | --     | --  |
|            | Ca(ICC2/PI489777)SNP_16598 | 262  | C | T | 26 | 8  | --     | --  |
| CakTC21124 | Ca(ICC2/PI489777)SNP_16599 | 240  | G | T | 4  | 3  | --     | --  |
|            | Ca(ICC2/PI489777)SNP_16600 | 241  | A | C | 5  | 3  | --     | --  |
|            | Ca(ICC2/PI489777)SNP_16601 | 1018 | G | A | 5  | 3  | --     | --  |
| CakTC29467 | Ca(ICC2/PI489777)SNP_16602 | 73   | G | C | 3  | 3  | Shoot  | --  |
|            | Ca(ICC2/PI489777)SNP_16603 | 596  | T | A | 3  | 3  | Shoot  | --  |
|            | Ca(ICC2/PI489777)SNP_16604 | 926  | C | A | 5  | 3  | Shoot  | --  |
| CakTC23123 | Ca(ICC2/PI489777)SNP_16605 | 2304 | G | A | 5  | 3  | Flower | bud |
| CakTC11603 | Ca(ICC2/PI489777)SNP_16606 | 940  | T | G | 67 | 23 | --     | --  |
|            | Ca(ICC2/PI489777)SNP_16607 | 976  | C | G | 62 | 20 | --     | --  |
| CakTC43262 | Ca(ICC2/PI489777)SNP_16608 | 308  | C | T | 3  | 6  | --     | --  |
|            | Ca(ICC2/PI489777)SNP_16609 | 782  | G | A | 5  | 4  | --     | --  |
|            | Ca(ICC2/PI489777)SNP_16610 | 806  | T | A | 6  | 3  | --     | --  |
|            | Ca(ICC2/PI489777)SNP_16611 | 1441 | T | C | 3  | 5  | --     | --  |
|            | Ca(ICC2/PI489777)SNP_16612 | 1604 | A | G | 4  | 4  | --     | --  |
|            | Ca(ICC2/PI489777)SNP_16613 | 1669 | G | C | 5  | 3  | --     | --  |
| CakTC41715 | Ca(ICC2/PI489777)SNP_16614 | 133  | A | G | 5  | 5  | --     | --  |
|            | Ca(ICC2/PI489777)SNP_16615 | 362  | G | A | 11 | 5  | --     | --  |
|            | Ca(ICC2/PI489777)SNP_16616 | 1040 | C | T | 10 | 7  | --     | --  |
|            | Ca(ICC2/PI489777)SNP_16617 | 1523 | T | C | 8  | 8  | --     | --  |
|            | Ca(ICC2/PI489777)SNP_16618 | 1666 | C | G | 12 | 7  | --     | --  |
|            | Ca(ICC2/PI489777)SNP_16619 | 2057 | A | T | 13 | 3  | --     | --  |
|            | Ca(ICC2/PI489777)SNP_16620 | 2105 | C | T | 7  | 5  | --     | --  |
| CakTC25204 | Ca(ICC2/PI489777)SNP_16621 | 2010 | T | C | 44 | 12 | --     | --  |
|            | Ca(ICC2/PI489777)SNP_16622 | 2649 | A | G | 18 | 6  | --     | --  |
|            | Ca(ICC2/PI489777)SNP_16623 | 2677 | G | A | 15 | 7  | --     | --  |
| CakTC38139 | Ca(ICC2/PI489777)SNP_16624 | 351  | A | G | 19 | 18 | --     | --  |
|            | Ca(ICC2/PI489777)SNP_16625 | 486  | T | C | 10 | 15 | --     | --  |
| CakTC28487 | Ca(ICC2/PI489777)SNP_16626 | 1206 | G | T | 35 | 11 | --     | --  |
| CakTC17916 | Ca(ICC2/PI489777)SNP_16627 | 590  | A | G | 4  | 3  | --     | --  |
| CakTC40475 | Ca(ICC2/PI489777)SNP_16628 | 142  | A | T | 7  | 5  | --     | --  |
|            | Ca(ICC2/PI489777)SNP_16629 | 304  | C | T | 7  | 6  | --     | --  |
|            | Ca(ICC2/PI489777)SNP_16630 | 596  | A | G | 11 | 12 | --     | --  |
|            | Ca(ICC2/PI489777)SNP_16631 | 2102 | G | A | 11 | 12 | --     | --  |
| CakTC10738 | Ca(ICC2/PI489777)SNP_16632 | 1005 | A | G | 9  | 4  | --     | --  |
|            | Ca(ICC2/PI489777)SNP_16633 | 1214 | A | G | 9  | 3  | --     | --  |
| CakTC35010 | Ca(ICC2/PI489777)SNP_16634 | 145  | G | A | 15 | 9  | --     | --  |
|            | Ca(ICC2/PI489777)SNP_16635 | 661  | A | G | 27 | 12 | --     | --  |
|            | Ca(ICC2/PI489777)SNP_16636 | 932  | A | G | 20 | 9  | --     | --  |
|            | Ca(ICC2/PI489777)SNP_16637 | 1606 | G | A | 21 | 9  | --     | --  |
|            | Ca(ICC2/PI489777)SNP_16638 | 1816 | C | T | 22 | 9  | --     | --  |
| CakTC37440 | Ca(ICC2/PI489777)SNP_16639 | 1308 | C | T | 6  | 4  | --     | PHD |
| CakTC42648 | Ca(ICC2/PI489777)SNP_16640 | 376  | G | C | 20 | 3  | --     | --  |
|            | Ca(ICC2/PI489777)SNP_16641 | 612  | G | A | 12 | 3  | --     | --  |
|            | Ca(ICC2/PI489777)SNP_16642 | 1030 | A | G | 20 | 16 | --     | --  |
|            | Ca(ICC2/PI489777)SNP_16643 | 1083 | C | T | 22 | 16 | --     | --  |
| CakTC41706 | Ca(ICC2/PI489777)SNP_16644 | 46   | C | T | 4  | 5  | --     | --  |
| CakTC39980 | Ca(ICC2/PI489777)SNP_16645 | 331  | T | A | 12 | 19 | --     | --  |

|            |                            |      |   |   |    |    |           |     |
|------------|----------------------------|------|---|---|----|----|-----------|-----|
|            | Ca(ICC2/PI489777)SNP_16646 | 505  | G | A | 15 | 12 | --        | --  |
|            | Ca(ICC2/PI489777)SNP_16647 | 1150 | C | G | 26 | 16 | --        | --  |
|            | Ca(ICC2/PI489777)SNP_16648 | 1293 | T | C | 25 | 12 | --        | --  |
|            | Ca(ICC2/PI489777)SNP_16649 | 1344 | C | T | 16 | 5  | --        | --  |
| CakTC32395 | Ca(ICC2/PI489777)SNP_16650 | 148  | A | C | 9  | 4  | --        | --  |
|            | Ca(ICC2/PI489777)SNP_16651 | 342  | A | G | 15 | 15 | --        | --  |
| CakTC28037 | Ca(ICC2/PI489777)SNP_16652 | 436  | T | C | 9  | 3  | --        | --  |
|            | Ca(ICC2/PI489777)SNP_16653 | 757  | G | T | 7  | 3  | --        | --  |
| CakTC13058 | Ca(ICC2/PI489777)SNP_16654 | 882  | C | T | 66 | 61 | --        | --  |
|            | Ca(ICC2/PI489777)SNP_16655 | 1068 | C | G | 27 | 36 | --        | --  |
|            | Ca(ICC2/PI489777)SNP_16656 | 1164 | T | C | 9  | 12 | --        | --  |
|            | Ca(ICC2/PI489777)SNP_16657 | 1776 | C | T | 4  | 8  | --        | --  |
| CakTC11642 | Ca(ICC2/PI489777)SNP_16658 | 287  | T | C | 5  | 3  | --        | --  |
|            | Ca(ICC2/PI489777)SNP_16659 | 396  | G | A | 4  | 3  | --        | --  |
| CakTC06109 | Ca(ICC2/PI489777)SNP_16660 | 186  | A | C | 11 | 3  | --        | --  |
|            | Ca(ICC2/PI489777)SNP_16661 | 781  | A | G | 9  | 11 | --        | --  |
|            | Ca(ICC2/PI489777)SNP_16662 | 799  | T | G | 11 | 12 | --        | --  |
|            | Ca(ICC2/PI489777)SNP_16663 | 853  | A | G | 14 | 8  | --        | --  |
|            | Ca(ICC2/PI489777)SNP_16664 | 1077 | G | A | 15 | 8  | --        | --  |
| CakTC25772 | Ca(ICC2/PI489777)SNP_16665 | 965  | T | C | 48 | 17 | --        | HB  |
|            | Ca(ICC2/PI489777)SNP_16666 | 1124 | A | C | 46 | 16 | --        | HB  |
| CakTC30114 | Ca(ICC2/PI489777)SNP_16667 | 659  | T | C | 4  | 4  | Flower    | bud |
|            | Ca(ICC2/PI489777)SNP_16668 | 710  | G | C | 4  | 5  | Flower    | bud |
| CakTC31036 | Ca(ICC2/PI489777)SNP_16669 | 306  | C | T | 3  | 4  | --        | --  |
| CakTC02396 | Ca(ICC2/PI489777)SNP_16670 | 355  | T | C | 14 | 18 | --        | --  |
|            | Ca(ICC2/PI489777)SNP_16671 | 1006 | A | G | 18 | 9  | --        | --  |
|            | Ca(ICC2/PI489777)SNP_16672 | 1261 | C | T | 20 | 7  | --        | --  |
|            | Ca(ICC2/PI489777)SNP_16673 | 1315 | A | G | 17 | 5  | --        | --  |
|            | Ca(ICC2/PI489777)SNP_16674 | 1495 | A | G | 7  | 3  | --        | --  |
| CakTC32911 | Ca(ICC2/PI489777)SNP_16675 | 224  | A | G | 42 | 6  | --        | --  |
|            | Ca(ICC2/PI489777)SNP_16676 | 314  | T | C | 49 | 6  | --        | --  |
|            | Ca(ICC2/PI489777)SNP_16677 | 358  | T | C | 45 | 6  | --        | --  |
|            | Ca(ICC2/PI489777)SNP_16678 | 378  | A | G | 43 | 5  | --        | --  |
|            | Ca(ICC2/PI489777)SNP_16679 | 402  | C | G | 43 | 5  | --        | --  |
| CakTC22535 | Ca(ICC2/PI489777)SNP_16680 | 728  | A | G | 6  | 3  | --        | --  |
|            | Ca(ICC2/PI489777)SNP_16681 | 1215 | G | C | 6  | 4  | --        | --  |
|            | Ca(ICC2/PI489777)SNP_16682 | 1907 | T | C | 13 | 8  | --        | --  |
| CakTC38424 | Ca(ICC2/PI489777)SNP_16683 | 614  | C | T | 8  | 9  | --        | --  |
|            | Ca(ICC2/PI489777)SNP_16684 | 710  | T | C | 5  | 6  | --        | --  |
| CakTC41608 | Ca(ICC2/PI489777)SNP_16685 | 659  | T | A | 14 | 6  | --        | --  |
|            | Ca(ICC2/PI489777)SNP_16686 | 729  | A | G | 12 | 6  | --        | --  |
|            | Ca(ICC2/PI489777)SNP_16687 | 738  | G | A | 11 | 6  | --        | --  |
|            | Ca(ICC2/PI489777)SNP_16688 | 800  | A | G | 9  | 4  | --        | --  |
| CakTC28085 | Ca(ICC2/PI489777)SNP_16689 | 1055 | C | T | 54 | 17 | --        | --  |
| CakTC39373 | Ca(ICC2/PI489777)SNP_16690 | 77   | T | C | 5  | 4  | --        | --  |
|            | Ca(ICC2/PI489777)SNP_16691 | 110  | T | C | 7  | 8  | --        | --  |
|            | Ca(ICC2/PI489777)SNP_16692 | 344  | A | C | 13 | 33 | --        | --  |
| CakTC41889 | Ca(ICC2/PI489777)SNP_16693 | 230  | A | G | 28 | 16 | --        | --  |
|            | Ca(ICC2/PI489777)SNP_16694 | 407  | C | T | 30 | 17 | --        | --  |
|            | Ca(ICC2/PI489777)SNP_16695 | 707  | C | T | 12 | 9  | --        | --  |
| CakTC33453 | Ca(ICC2/PI489777)SNP_16696 | 123  | G | A | 3  | 13 | --        | --  |
| CakTC31568 | Ca(ICC2/PI489777)SNP_16697 | 1800 | A | G | 11 | 3  | Young_pod | --  |
|            | Ca(ICC2/PI489777)SNP_16698 | 3162 | G | T | 16 | 6  | Young_pod | --  |
| CakTC39285 | Ca(ICC2/PI489777)SNP_16699 | 1254 | A | T | 19 | 15 | --        | --  |
|            | Ca(ICC2/PI489777)SNP_16700 | 1384 | C | T | 16 | 4  | --        | --  |
| CakTC33776 | Ca(ICC2/PI489777)SNP_16701 | 243  | C | T | 6  | 3  | --        | --  |
| CakTC38284 | Ca(ICC2/PI489777)SNP_16702 | 110  | C | G | 9  | 6  | --        | --  |
|            | Ca(ICC2/PI489777)SNP_16703 | 136  | G | C | 17 | 10 | --        | --  |
|            | Ca(ICC2/PI489777)SNP_16704 | 141  | G | C | 20 | 10 | --        | --  |
| CakTC09445 | Ca(ICC2/PI489777)SNP_16705 | 227  | T | G | 5  | 4  | --        | MYB |
|            | Ca(ICC2/PI489777)SNP_16706 | 393  | A | T | 7  | 4  | --        | MYB |
| CakTC40605 | Ca(ICC2/PI489777)SNP_16707 | 605  | C | T | 5  | 3  | --        | --  |
|            | Ca(ICC2/PI489777)SNP_16708 | 629  | A | G | 5  | 3  | --        | --  |
|            | Ca(ICC2/PI489777)SNP_16709 | 1652 | G | A | 3  | 7  | --        | --  |
|            | Ca(ICC2/PI489777)SNP_16710 | 1754 | A | C | 5  | 7  | --        | --  |
|            | Ca(ICC2/PI489777)SNP_16711 | 1915 | G | T | 8  | 6  | --        | --  |
|            | Ca(ICC2/PI489777)SNP_16712 | 1973 | C | T | 8  | 7  | --        | --  |
|            | Ca(ICC2/PI489777)SNP_16713 | 2035 | A | T | 7  | 3  | --        | --  |
| CakTC42754 | Ca(ICC2/PI489777)SNP_16714 | 640  | T | C | 11 | 11 | --        | --  |
|            | Ca(ICC2/PI489777)SNP_16715 | 741  | A | G | 12 | 6  | --        | --  |
|            | Ca(ICC2/PI489777)SNP_16716 | 831  | A | G | 11 | 5  | --        | --  |
| CakTC26915 | Ca(ICC2/PI489777)SNP_16717 | 386  | C | G | 26 | 6  | --        | --  |
|            | Ca(ICC2/PI489777)SNP_16718 | 457  | G | A | 22 | 9  | --        | --  |
|            | Ca(ICC2/PI489777)SNP_16719 | 763  | C | A | 14 | 6  | --        | --  |

|            |                            |      |   |   |    |    |    |    |
|------------|----------------------------|------|---|---|----|----|----|----|
| CakTC39160 | Ca(ICC2/PI489777)SNP_16720 | 22   | A | T | 4  | 4  | -- | -- |
|            | Ca(ICC2/PI489777)SNP_16721 | 159  | T | C | 4  | 10 | -- | -- |
|            | Ca(ICC2/PI489777)SNP_16722 | 413  | T | C | 10 | 7  | -- | -- |
|            | Ca(ICC2/PI489777)SNP_16723 | 515  | A | G | 11 | 3  | -- | -- |
|            | Ca(ICC2/PI489777)SNP_16724 | 1234 | A | G | 7  | 4  | -- | -- |
|            | Ca(ICC2/PI489777)SNP_16725 | 1431 | C | G | 4  | 3  | -- | -- |
|            | Ca(ICC2/PI489777)SNP_16726 | 1463 | G | A | 4  | 3  | -- | -- |
|            | Ca(ICC2/PI489777)SNP_16727 | 1490 | G | A | 4  | 3  | -- | -- |
| CakTC34172 | Ca(ICC2/PI489777)SNP_16728 | 312  | T | G | 38 | 21 | -- | -- |
|            | Ca(ICC2/PI489777)SNP_16729 | 386  | T | A | 40 | 22 | -- | -- |
|            | Ca(ICC2/PI489777)SNP_16730 | 845  | C | A | 30 | 21 | -- | -- |
|            | Ca(ICC2/PI489777)SNP_16731 | 848  | G | A | 31 | 21 | -- | -- |
|            | Ca(ICC2/PI489777)SNP_16732 | 1676 | A | G | 23 | 28 | -- | -- |
|            | Ca(ICC2/PI489777)SNP_16733 | 1765 | A | G | 35 | 35 | -- | -- |
|            | Ca(ICC2/PI489777)SNP_16734 | 2066 | A | C | 23 | 13 | -- | -- |
| CakTC42120 | Ca(ICC2/PI489777)SNP_16735 | 1008 | G | C | 7  | 6  | -- | -- |
|            | Ca(ICC2/PI489777)SNP_16736 | 1026 | T | C | 8  | 5  | -- | -- |
| CakTC22981 | Ca(ICC2/PI489777)SNP_16737 | 2168 | T | G | 70 | 20 | -- | -- |
|            | Ca(ICC2/PI489777)SNP_16738 | 2267 | C | G | 12 | 17 | -- | -- |
|            | Ca(ICC2/PI489777)SNP_16739 | 2282 | A | C | 9  | 17 | -- | -- |
|            | Ca(ICC2/PI489777)SNP_16740 | 2308 | T | G | 8  | 14 | -- | -- |
|            | Ca(ICC2/PI489777)SNP_16741 | 3043 | G | A | 6  | 3  | -- | -- |
|            | Ca(ICC2/PI489777)SNP_16742 | 3046 | T | A | 6  | 3  | -- | -- |
|            | Ca(ICC2/PI489777)SNP_16743 | 3148 | T | G | 5  | 3  | -- | -- |
|            | Ca(ICC2/PI489777)SNP_16744 | 3183 | T | C | 7  | 5  | -- | -- |
|            | Ca(ICC2/PI489777)SNP_16745 | 3189 | T | C | 7  | 4  | -- | -- |
|            | Ca(ICC2/PI489777)SNP_16746 | 3227 | G | A | 7  | 4  | -- | -- |
|            | Ca(ICC2/PI489777)SNP_16747 | 3265 | T | A | 7  | 5  | -- | -- |
|            | Ca(ICC2/PI489777)SNP_16748 | 3313 | A | G | 7  | 5  | -- | -- |
|            | Ca(ICC2/PI489777)SNP_16749 | 3319 | A | G | 7  | 5  | -- | -- |
|            | Ca(ICC2/PI489777)SNP_16750 | 3328 | G | C | 9  | 5  | -- | -- |
|            | Ca(ICC2/PI489777)SNP_16751 | 3383 | A | C | 6  | 4  | -- | -- |
|            | Ca(ICC2/PI489777)SNP_16752 | 3405 | T | C | 8  | 4  | -- | -- |
|            | Ca(ICC2/PI489777)SNP_16753 | 3406 | C | T | 8  | 4  | -- | -- |
| CakTC38527 | Ca(ICC2/PI489777)SNP_16754 | 724  | A | G | 9  | 7  | -- | -- |
|            | Ca(ICC2/PI489777)SNP_16755 | 770  | A | G | 9  | 8  | -- | -- |
|            | Ca(ICC2/PI489777)SNP_16756 | 839  | T | A | 8  | 6  | -- | -- |
| CakTC41147 | Ca(ICC2/PI489777)SNP_16757 | 637  | T | G | 7  | 3  | -- | -- |
|            | Ca(ICC2/PI489777)SNP_16758 | 1417 | G | A | 13 | 11 | -- | -- |
| CakTC12575 | Ca(ICC2/PI489777)SNP_16759 | 167  | T | A | 3  | 7  | -- | -- |
|            | Ca(ICC2/PI489777)SNP_16760 | 249  | A | T | 7  | 7  | -- | -- |
| CakTC28603 | Ca(ICC2/PI489777)SNP_16761 | 140  | T | G | 17 | 13 | -- | -- |
|            | Ca(ICC2/PI489777)SNP_16762 | 150  | A | G | 19 | 13 | -- | -- |
|            | Ca(ICC2/PI489777)SNP_16763 | 516  | A | G | 45 | 20 | -- | -- |
|            | Ca(ICC2/PI489777)SNP_16764 | 1236 | C | G | 34 | 9  | -- | -- |
|            | Ca(ICC2/PI489777)SNP_16765 | 1791 | G | A | 23 | 13 | -- | -- |
|            | Ca(ICC2/PI489777)SNP_16766 | 1926 | T | G | 37 | 18 | -- | -- |
|            | Ca(ICC2/PI489777)SNP_16767 | 2055 | G | A | 25 | 11 | -- | -- |
| CakTC39777 | Ca(ICC2/PI489777)SNP_16768 | 112  | A | C | 9  | 4  | -- | -- |
|            | Ca(ICC2/PI489777)SNP_16769 | 471  | C | T | 9  | 5  | -- | -- |
|            | Ca(ICC2/PI489777)SNP_16770 | 510  | C | T | 10 | 5  | -- | -- |
|            | Ca(ICC2/PI489777)SNP_16771 | 746  | G | C | 10 | 4  | -- | -- |
|            | Ca(ICC2/PI489777)SNP_16772 | 839  | G | C | 11 | 3  | -- | -- |
| CakTC37081 | Ca(ICC2/PI489777)SNP_16773 | 1625 | C | T | 26 | 12 | -- | -- |
| CakTC10159 | Ca(ICC2/PI489777)SNP_16774 | 684  | T | A | 3  | 4  | -- | -- |
| CakTC36242 | Ca(ICC2/PI489777)SNP_16775 | 214  | C | A | 6  | 5  | -- | -- |
|            | Ca(ICC2/PI489777)SNP_16776 | 287  | C | A | 6  | 5  | -- | -- |
|            | Ca(ICC2/PI489777)SNP_16777 | 299  | G | A | 6  | 5  | -- | -- |
|            | Ca(ICC2/PI489777)SNP_16778 | 1591 | C | A | 3  | 4  | -- | -- |
|            | Ca(ICC2/PI489777)SNP_16779 | 1617 | A | C | 3  | 5  | -- | -- |
|            | Ca(ICC2/PI489777)SNP_16780 | 1673 | T | C | 3  | 4  | -- | -- |
|            | Ca(ICC2/PI489777)SNP_16781 | 1766 | T | G | 4  | 5  | -- | -- |
| CakTC08826 | Ca(ICC2/PI489777)SNP_16782 | 185  | G | A | 4  | 4  | -- | -- |
|            | Ca(ICC2/PI489777)SNP_16783 | 316  | T | A | 4  | 5  | -- | -- |
|            | Ca(ICC2/PI489777)SNP_16784 | 459  | G | C | 3  | 3  | -- | -- |
|            | Ca(ICC2/PI489777)SNP_16785 | 494  | G | T | 3  | 4  | -- | -- |
| CakTC30338 | Ca(ICC2/PI489777)SNP_16786 | 1515 | G | T | 3  | 11 | -- | -- |
|            | Ca(ICC2/PI489777)SNP_16787 | 2280 | C | G | 4  | 3  | -- | -- |
|            | Ca(ICC2/PI489777)SNP_16788 | 2973 | A | C | 7  | 3  | -- | -- |
|            | Ca(ICC2/PI489777)SNP_16789 | 3072 | G | A | 9  | 4  | -- | -- |
|            | Ca(ICC2/PI489777)SNP_16790 | 3267 | T | A | 5  | 7  | -- | -- |
|            | Ca(ICC2/PI489777)SNP_16791 | 3903 | A | T | 13 | 4  | -- | -- |
|            | Ca(ICC2/PI489777)SNP_16792 | 4272 | C | T | 8  | 8  | -- | -- |
|            | Ca(ICC2/PI489777)SNP_16793 | 4330 | C | T | 7  | 10 | -- | -- |

|            |                            |      |   |   |    |    |        |             |
|------------|----------------------------|------|---|---|----|----|--------|-------------|
| CakTC28519 | Ca(ICC2/PI489777)SNP_16794 | 1408 | A | C | 6  | 3  | --     | --          |
|            | Ca(ICC2/PI489777)SNP_16795 | 2503 | A | G | 4  | 5  | --     | --          |
|            | Ca(ICC2/PI489777)SNP_16796 | 2677 | A | C | 3  | 4  | --     | --          |
| CakTC31094 | Ca(ICC2/PI489777)SNP_16797 | 652  | G | A | 4  | 9  | --     | --          |
|            | Ca(ICC2/PI489777)SNP_16798 | 1690 | C | T | 5  | 10 | --     | --          |
| CakTC27025 | Ca(ICC2/PI489777)SNP_16799 | 88   | C | A | 7  | 8  | --     | --          |
|            | Ca(ICC2/PI489777)SNP_16800 | 283  | G | C | 10 | 7  | --     | --          |
|            | Ca(ICC2/PI489777)SNP_16801 | 600  | A | T | 14 | 9  | --     | --          |
|            | Ca(ICC2/PI489777)SNP_16802 | 606  | T | G | 14 | 9  | --     | --          |
| CakTC25596 | Ca(ICC2/PI489777)SNP_16803 | 96   | G | A | 16 | 12 | --     | --          |
|            | Ca(ICC2/PI489777)SNP_16804 | 179  | C | G | 15 | 10 | --     | --          |
|            | Ca(ICC2/PI489777)SNP_16805 | 272  | T | C | 11 | 10 | --     | --          |
|            | Ca(ICC2/PI489777)SNP_16806 | 281  | C | T | 13 | 10 | --     | --          |
| CakTC32817 | Ca(ICC2/PI489777)SNP_16807 | 1352 | T | C | 6  | 3  | --     | --          |
| CakTC38509 | Ca(ICC2/PI489777)SNP_16808 | 240  | G | A | 25 | 22 | --     | bZIP        |
|            | Ca(ICC2/PI489777)SNP_16809 | 263  | A | G | 26 | 20 | --     | bZIP        |
|            | Ca(ICC2/PI489777)SNP_16810 | 272  | C | T | 26 | 22 | --     | bZIP        |
|            | Ca(ICC2/PI489777)SNP_16811 | 1016 | C | T | 13 | 27 | --     | bZIP        |
|            | Ca(ICC2/PI489777)SNP_16812 | 1020 | T | A | 13 | 26 | --     | bZIP        |
| CakTC25580 | Ca(ICC2/PI489777)SNP_16813 | 379  | A | G | 21 | 11 | --     | --          |
|            | Ca(ICC2/PI489777)SNP_16814 | 413  | A | C | 23 | 14 | --     | --          |
|            | Ca(ICC2/PI489777)SNP_16815 | 422  | A | G | 24 | 14 | --     | --          |
|            | Ca(ICC2/PI489777)SNP_16816 | 488  | T | A | 28 | 16 | --     | --          |
|            | Ca(ICC2/PI489777)SNP_16817 | 568  | A | T | 26 | 17 | --     | --          |
|            | Ca(ICC2/PI489777)SNP_16818 | 603  | G | T | 36 | 19 | --     | --          |
|            | Ca(ICC2/PI489777)SNP_16819 | 705  | T | G | 34 | 12 | --     | --          |
|            | Ca(ICC2/PI489777)SNP_16820 | 773  | T | C | 37 | 15 | --     | --          |
|            | Ca(ICC2/PI489777)SNP_16821 | 780  | A | G | 36 | 10 | --     | --          |
|            | Ca(ICC2/PI489777)SNP_16822 | 907  | T | G | 34 | 10 | --     | --          |
|            | Ca(ICC2/PI489777)SNP_16823 | 1669 | T | C | 35 | 16 | --     | --          |
|            | Ca(ICC2/PI489777)SNP_16824 | 1881 | G | A | 45 | 14 | --     | --          |
|            | Ca(ICC2/PI489777)SNP_16825 | 2008 | C | T | 38 | 12 | --     | --          |
|            | Ca(ICC2/PI489777)SNP_16826 | 2379 | C | T | 12 | 12 | --     | --          |
|            | Ca(ICC2/PI489777)SNP_16827 | 2424 | G | A | 11 | 11 | --     | --          |
|            | Ca(ICC2/PI489777)SNP_16828 | 2440 | A | T | 10 | 6  | --     | --          |
|            | Ca(ICC2/PI489777)SNP_16829 | 2530 | T | A | 8  | 6  | --     | --          |
| CakTC41701 | Ca(ICC2/PI489777)SNP_16830 | 519  | C | G | 8  | 6  | --     | --          |
| CakTC37800 | Ca(ICC2/PI489777)SNP_16831 | 1157 | G | A | 7  | 4  | --     | --          |
| CakTC27575 | Ca(ICC2/PI489777)SNP_16832 | 201  | T | G | 24 | 10 | --     | --          |
| CakTC29594 | Ca(ICC2/PI489777)SNP_16833 | 169  | G | A | 22 | 7  | --     | --          |
|            | Ca(ICC2/PI489777)SNP_16834 | 631  | G | A | 37 | 10 | --     | --          |
| CakTC14543 | Ca(ICC2/PI489777)SNP_16835 | 147  | A | G | 5  | 4  | --     | --          |
| CakTC31246 | Ca(ICC2/PI489777)SNP_16836 | 131  | C | T | 24 | 21 | --     | --          |
|            | Ca(ICC2/PI489777)SNP_16837 | 1432 | G | A | 22 | 9  | --     | --          |
|            | Ca(ICC2/PI489777)SNP_16838 | 2254 | C | T | 38 | 20 | --     | --          |
| CakTC27990 | Ca(ICC2/PI489777)SNP_16839 | 114  | G | T | 9  | 6  | --     | --          |
| CakTC35843 | Ca(ICC2/PI489777)SNP_16840 | 1538 | T | C | 13 | 4  | --     | --          |
|            | Ca(ICC2/PI489777)SNP_16841 | 1610 | G | A | 12 | 6  | --     | --          |
|            | Ca(ICC2/PI489777)SNP_16842 | 1694 | A | G | 11 | 9  | --     | --          |
|            | Ca(ICC2/PI489777)SNP_16843 | 2063 | A | T | 8  | 3  | --     | --          |
|            | Ca(ICC2/PI489777)SNP_16844 | 2137 | T | C | 9  | 4  | --     | --          |
|            | Ca(ICC2/PI489777)SNP_16845 | 3026 | T | C | 5  | 4  | --     | --          |
|            | Ca(ICC2/PI489777)SNP_16846 | 3357 | A | G | 12 | 3  | --     | --          |
|            | Ca(ICC2/PI489777)SNP_16847 | 3711 | G | A | 13 | 7  | --     | --          |
|            | Ca(ICC2/PI489777)SNP_16848 | 3993 | A | G | 15 | 11 | --     | --          |
| CakTC26040 | Ca(ICC2/PI489777)SNP_16849 | 3913 | A | G | 21 | 5  | --     | --          |
| CakTC43048 | Ca(ICC2/PI489777)SNP_16850 | 822  | T | C | 9  | 4  | Root   | --          |
|            | Ca(ICC2/PI489777)SNP_16851 | 885  | T | C | 6  | 4  | Root   | --          |
| CakTC25595 | Ca(ICC2/PI489777)SNP_16852 | 741  | G | C | 24 | 3  | --     | bHLH        |
| CakTC04230 | Ca(ICC2/PI489777)SNP_16853 | 3600 | T | C | 4  | 3  | --     | PHD         |
| CakTC40496 | Ca(ICC2/PI489777)SNP_16854 | 138  | G | A | 5  | 3  | --     | --          |
| CakTC10621 | Ca(ICC2/PI489777)SNP_16855 | 347  | G | A | 3  | 4  | Flower | bud         |
| CakTC27426 | Ca(ICC2/PI489777)SNP_16856 | 130  | C | T | 6  | 9  | --     | MYB-related |
|            | Ca(ICC2/PI489777)SNP_16857 | 163  | C | G | 10 | 9  | --     | MYB-related |
|            | Ca(ICC2/PI489777)SNP_16858 | 168  | A | C | 10 | 9  | --     | MYB-related |
|            | Ca(ICC2/PI489777)SNP_16859 | 767  | G | A | 23 | 6  | --     | MYB-related |
|            | Ca(ICC2/PI489777)SNP_16860 | 844  | T | C | 11 | 9  | --     | MYB-related |
|            | Ca(ICC2/PI489777)SNP_16861 | 1005 | C | A | 10 | 6  | --     | MYB-related |
| CakTC13172 | Ca(ICC2/PI489777)SNP_16862 | 525  | C | T | 51 | 3  | --     | --          |
|            | Ca(ICC2/PI489777)SNP_16863 | 621  | A | T | 46 | 6  | --     | --          |
| CakTC39902 | Ca(ICC2/PI489777)SNP_16864 | 177  | A | G | 9  | 4  | --     | --          |
|            | Ca(ICC2/PI489777)SNP_16865 | 189  | A | G | 12 | 5  | --     | --          |
|            | Ca(ICC2/PI489777)SNP_16866 | 258  | A | C | 11 | 5  | --     | --          |
| CakTC02959 | Ca(ICC2/PI489777)SNP_16867 | 680  | A | G | 3  | 8  | --     | --          |

|            |                            |      |   |   |    |    |        |     |
|------------|----------------------------|------|---|---|----|----|--------|-----|
|            | Ca(ICC2/PI489777)SNP_16868 | 930  | C | T | 5  | 7  | --     | --  |
| CakTC30190 | Ca(ICC2/PI489777)SNP_16869 | 1149 | T | C | 4  | 3  | --     | --  |
| CakTC09971 | Ca(ICC2/PI489777)SNP_16870 | 293  | A | C | 5  | 5  | --     | --  |
| CakTC37782 | Ca(ICC2/PI489777)SNP_16871 | 340  | A | G | 4  | 8  | --     | --  |
|            | Ca(ICC2/PI489777)SNP_16872 | 583  | G | C | 4  | 11 | --     | --  |
| CakTC27360 | Ca(ICC2/PI489777)SNP_16873 | 1097 | A | C | 24 | 17 | --     | --  |
|            | Ca(ICC2/PI489777)SNP_16874 | 1260 | T | C | 24 | 24 | --     | --  |
|            | Ca(ICC2/PI489777)SNP_16875 | 1295 | A | G | 24 | 29 | --     | --  |
|            | Ca(ICC2/PI489777)SNP_16876 | 1385 | A | G | 15 | 20 | --     | --  |
| CakTC40414 | Ca(ICC2/PI489777)SNP_16877 | 1199 | A | G | 4  | 7  | Flower | bud |
| CakTC42143 | Ca(ICC2/PI489777)SNP_16878 | 107  | C | G | 5  | 6  | --     | --  |
|            | Ca(ICC2/PI489777)SNP_16879 | 696  | A | G | 7  | 4  | --     | --  |
|            | Ca(ICC2/PI489777)SNP_16880 | 819  | C | T | 4  | 8  | --     | --  |
|            | Ca(ICC2/PI489777)SNP_16881 | 1110 | C | T | 10 | 3  | --     | --  |
|            | Ca(ICC2/PI489777)SNP_16882 | 1200 | T | C | 11 | 6  | --     | --  |
|            | Ca(ICC2/PI489777)SNP_16883 | 1329 | C | G | 6  | 9  | --     | --  |
| CakTC06697 | Ca(ICC2/PI489777)SNP_16884 | 798  | A | T | 4  | 4  | Flower | bud |
| CakTC27871 | Ca(ICC2/PI489777)SNP_16885 | 696  | C | G | 18 | 25 | Root   | --  |
| CakTC35227 | Ca(ICC2/PI489777)SNP_16886 | 116  | A | T | 22 | 12 | --     | --  |
|            | Ca(ICC2/PI489777)SNP_16887 | 149  | A | G | 25 | 12 | --     | --  |
|            | Ca(ICC2/PI489777)SNP_16888 | 162  | A | G | 21 | 12 | --     | --  |
|            | Ca(ICC2/PI489777)SNP_16889 | 349  | G | A | 34 | 12 | --     | --  |
|            | Ca(ICC2/PI489777)SNP_16890 | 372  | C | T | 33 | 13 | --     | --  |
|            | Ca(ICC2/PI489777)SNP_16891 | 493  | A | C | 28 | 11 | --     | --  |
|            | Ca(ICC2/PI489777)SNP_16892 | 630  | T | A | 23 | 16 | --     | --  |
|            | Ca(ICC2/PI489777)SNP_16893 | 632  | A | G | 24 | 16 | --     | --  |
|            | Ca(ICC2/PI489777)SNP_16894 | 692  | G | A | 24 | 15 | --     | --  |
|            | Ca(ICC2/PI489777)SNP_16895 | 1006 | G | A | 35 | 29 | --     | --  |
|            | Ca(ICC2/PI489777)SNP_16896 | 1072 | G | A | 32 | 26 | --     | --  |
|            | Ca(ICC2/PI489777)SNP_16897 | 1388 | G | A | 32 | 18 | --     | --  |
|            | Ca(ICC2/PI489777)SNP_16898 | 1734 | A | C | 40 | 36 | --     | --  |
|            | Ca(ICC2/PI489777)SNP_16899 | 2002 | C | T | 36 | 25 | --     | --  |
|            | Ca(ICC2/PI489777)SNP_16900 | 2206 | C | T | 21 | 18 | --     | --  |
|            | Ca(ICC2/PI489777)SNP_16901 | 2227 | G | A | 22 | 22 | --     | --  |
| CakTC10659 | Ca(ICC2/PI489777)SNP_16902 | 40   | A | G | 7  | 4  | --     | --  |
|            | Ca(ICC2/PI489777)SNP_16903 | 1952 | C | T | 52 | 6  | --     | --  |
| CakTC41081 | Ca(ICC2/PI489777)SNP_16904 | 106  | G | T | 3  | 7  | --     | --  |
| CakTC39304 | Ca(ICC2/PI489777)SNP_16905 | 731  | T | C | 6  | 3  | --     | TPR |
|            | Ca(ICC2/PI489777)SNP_16906 | 890  | T | C | 7  | 4  | --     | TPR |
|            | Ca(ICC2/PI489777)SNP_16907 | 1126 | G | T | 4  | 3  | --     | TPR |
| CakTC38037 | Ca(ICC2/PI489777)SNP_16908 | 165  | A | G | 23 | 59 | Root   | --  |
|            | Ca(ICC2/PI489777)SNP_16909 | 899  | G | A | 19 | 41 | Root   | --  |
|            | Ca(ICC2/PI489777)SNP_16910 | 1015 | A | T | 11 | 21 | Root   | --  |
|            | Ca(ICC2/PI489777)SNP_16911 | 1067 | C | T | 5  | 14 | Root   | --  |
| CakTC22618 | Ca(ICC2/PI489777)SNP_16912 | 456  | G | A | 9  | 4  | --     | --  |
|            | Ca(ICC2/PI489777)SNP_16913 | 673  | G | A | 4  | 3  | --     | --  |
| CakTC39749 | Ca(ICC2/PI489777)SNP_16914 | 227  | A | G | 4  | 5  | --     | --  |
|            | Ca(ICC2/PI489777)SNP_16915 | 311  | A | G | 4  | 6  | --     | --  |
|            | Ca(ICC2/PI489777)SNP_16916 | 316  | A | G | 4  | 6  | --     | --  |
|            | Ca(ICC2/PI489777)SNP_16917 | 463  | T | C | 4  | 6  | --     | --  |
|            | Ca(ICC2/PI489777)SNP_16918 | 790  | T | G | 5  | 5  | --     | --  |
|            | Ca(ICC2/PI489777)SNP_16919 | 813  | C | T | 3  | 3  | --     | --  |
| CakTC30958 | Ca(ICC2/PI489777)SNP_16920 | 549  | G | A | 11 | 4  | --     | --  |
|            | Ca(ICC2/PI489777)SNP_16921 | 592  | G | A | 11 | 4  | --     | --  |
|            | Ca(ICC2/PI489777)SNP_16922 | 783  | G | T | 3  | 5  | --     | --  |
|            | Ca(ICC2/PI489777)SNP_16923 | 1191 | C | T | 5  | 11 | --     | --  |
| CakTC31514 | Ca(ICC2/PI489777)SNP_16924 | 1397 | A | G | 10 | 4  | --     | --  |
|            | Ca(ICC2/PI489777)SNP_16925 | 1772 | T | C | 8  | 6  | --     | --  |
| CakTC39577 | Ca(ICC2/PI489777)SNP_16926 | 1524 | G | A | 14 | 13 | --     | --  |
| CakTC28239 | Ca(ICC2/PI489777)SNP_16927 | 203  | G | A | 26 | 6  | --     | --  |
|            | Ca(ICC2/PI489777)SNP_16928 | 780  | A | T | 24 | 9  | --     | --  |
|            | Ca(ICC2/PI489777)SNP_16929 | 783  | T | A | 21 | 9  | --     | --  |
| CakTC39724 | Ca(ICC2/PI489777)SNP_16930 | 1159 | C | T | 4  | 4  | --     | --  |
| CakTC26166 | Ca(ICC2/PI489777)SNP_16931 | 230  | G | A | 4  | 6  | --     | --  |
|            | Ca(ICC2/PI489777)SNP_16932 | 295  | G | T | 8  | 12 | --     | --  |
|            | Ca(ICC2/PI489777)SNP_16933 | 316  | G | A | 8  | 13 | --     | --  |
|            | Ca(ICC2/PI489777)SNP_16934 | 1074 | G | A | 6  | 7  | --     | --  |
|            | Ca(ICC2/PI489777)SNP_16935 | 1146 | C | T | 4  | 7  | --     | --  |
|            | Ca(ICC2/PI489777)SNP_16936 | 1355 | T | C | 7  | 4  | --     | --  |
|            | Ca(ICC2/PI489777)SNP_16937 | 2145 | G | A | 3  | 3  | --     | --  |
| CakTC37202 | Ca(ICC2/PI489777)SNP_16938 | 351  | G | A | 3  | 5  | --     | --  |
|            | Ca(ICC2/PI489777)SNP_16939 | 381  | G | C | 3  | 4  | --     | --  |
| CakTC25316 | Ca(ICC2/PI489777)SNP_16940 | 1751 | G | A | 8  | 4  | --     | --  |
|            | Ca(ICC2/PI489777)SNP_16941 | 1970 | G | A | 10 | 5  | --     | --  |

|            |                             |      |   |   |     |    |    |      |
|------------|-----------------------------|------|---|---|-----|----|----|------|
| CakTC41587 | Ca(ICCV2/PI489777)SNP_16942 | 183  | G | C | 15  | 23 | -- | --   |
|            | Ca(ICCV2/PI489777)SNP_16943 | 420  | C | T | 19  | 19 | -- | --   |
| CakTC38615 | Ca(ICCV2/PI489777)SNP_16944 | 863  | A | C | 4   | 9  | -- | --   |
|            | Ca(ICCV2/PI489777)SNP_16945 | 895  | C | T | 4   | 8  | -- | --   |
|            | Ca(ICCV2/PI489777)SNP_16946 | 941  | G | T | 4   | 9  | -- | --   |
|            | Ca(ICCV2/PI489777)SNP_16947 | 943  | C | T | 4   | 9  | -- | --   |
| CakTC39277 | Ca(ICCV2/PI489777)SNP_16948 | 661  | T | A | 17  | 7  | -- | --   |
|            | Ca(ICCV2/PI489777)SNP_16949 | 949  | C | T | 9   | 9  | -- | --   |
|            | Ca(ICCV2/PI489777)SNP_16950 | 1140 | T | G | 13  | 11 | -- | --   |
| CakTC11465 | Ca(ICCV2/PI489777)SNP_16951 | 115  | G | A | 4   | 3  | -- | --   |
|            | Ca(ICCV2/PI489777)SNP_16952 | 197  | C | A | 4   | 5  | -- | --   |
|            | Ca(ICCV2/PI489777)SNP_16953 | 407  | G | A | 14  | 8  | -- | --   |
|            | Ca(ICCV2/PI489777)SNP_16954 | 467  | A | G | 14  | 12 | -- | --   |
|            | Ca(ICCV2/PI489777)SNP_16955 | 987  | T | C | 20  | 15 | -- | --   |
|            | Ca(ICCV2/PI489777)SNP_16956 | 1023 | G | A | 26  | 19 | -- | --   |
|            | Ca(ICCV2/PI489777)SNP_16957 | 1634 | G | A | 13  | 12 | -- | --   |
|            | Ca(ICCV2/PI489777)SNP_16958 | 1643 | G | A | 12  | 12 | -- | --   |
| CakTC23162 | Ca(ICCV2/PI489777)SNP_16959 | 538  | G | C | 203 | 85 | -- | --   |
|            | Ca(ICCV2/PI489777)SNP_16960 | 790  | C | T | 68  | 45 | -- | --   |
| CakTC38158 | Ca(ICCV2/PI489777)SNP_16961 | 422  | C | A | 19  | 6  | -- | MADS |
| CakTC39148 | Ca(ICCV2/PI489777)SNP_16962 | 391  | A | G | 15  | 7  | -- | --   |
|            | Ca(ICCV2/PI489777)SNP_16963 | 507  | A | C | 18  | 13 | -- | --   |
| CakTC11425 | Ca(ICCV2/PI489777)SNP_16964 | 858  | G | A | 8   | 4  | -- | --   |
|            | Ca(ICCV2/PI489777)SNP_16965 | 888  | C | T | 7   | 4  | -- | --   |
|            | Ca(ICCV2/PI489777)SNP_16966 | 909  | T | C | 7   | 4  | -- | --   |
|            | Ca(ICCV2/PI489777)SNP_16967 | 910  | G | T | 7   | 4  | -- | --   |
|            | Ca(ICCV2/PI489777)SNP_16968 | 925  | C | T | 7   | 4  | -- | --   |
|            | Ca(ICCV2/PI489777)SNP_16969 | 926  | A | G | 7   | 4  | -- | --   |
| CakTC33770 | Ca(ICCV2/PI489777)SNP_16970 | 23   | T | C | 6   | 3  | -- | --   |
|            | Ca(ICCV2/PI489777)SNP_16971 | 97   | C | T | 25  | 12 | -- | --   |
|            | Ca(ICCV2/PI489777)SNP_16972 | 100  | G | A | 25  | 11 | -- | --   |
|            | Ca(ICCV2/PI489777)SNP_16973 | 124  | C | T | 28  | 15 | -- | --   |
|            | Ca(ICCV2/PI489777)SNP_16974 | 166  | C | A | 29  | 14 | -- | --   |
|            | Ca(ICCV2/PI489777)SNP_16975 | 280  | G | A | 27  | 13 | -- | --   |
|            | Ca(ICCV2/PI489777)SNP_16976 | 341  | A | G | 28  | 15 | -- | --   |
| CakTC40051 | Ca(ICCV2/PI489777)SNP_16977 | 794  | A | C | 11  | 8  | -- | --   |
| CakTC01394 | Ca(ICCV2/PI489777)SNP_16978 | 423  | A | G | 14  | 3  | -- | --   |
|            | Ca(ICCV2/PI489777)SNP_16979 | 687  | A | G | 5   | 6  | -- | --   |
|            | Ca(ICCV2/PI489777)SNP_16980 | 701  | T | C | 5   | 5  | -- | --   |
|            | Ca(ICCV2/PI489777)SNP_16981 | 728  | G | C | 7   | 6  | -- | --   |
|            | Ca(ICCV2/PI489777)SNP_16982 | 758  | G | T | 5   | 7  | -- | --   |
|            | Ca(ICCV2/PI489777)SNP_16983 | 767  | T | C | 5   | 6  | -- | --   |
|            | Ca(ICCV2/PI489777)SNP_16984 | 804  | G | A | 4   | 5  | -- | --   |
| CakTC28396 | Ca(ICCV2/PI489777)SNP_16985 | 69   | A | G | 5   | 5  | -- | --   |
|            | Ca(ICCV2/PI489777)SNP_16986 | 89   | G | A | 8   | 8  | -- | --   |
|            | Ca(ICCV2/PI489777)SNP_16987 | 98   | C | G | 7   | 7  | -- | --   |
|            | Ca(ICCV2/PI489777)SNP_16988 | 165  | A | G | 14  | 11 | -- | --   |
|            | Ca(ICCV2/PI489777)SNP_16989 | 206  | C | A | 14  | 13 | -- | --   |
|            | Ca(ICCV2/PI489777)SNP_16990 | 460  | T | C | 22  | 15 | -- | --   |
|            | Ca(ICCV2/PI489777)SNP_16991 | 508  | A | G | 22  | 17 | -- | --   |
| CakTC11627 | Ca(ICCV2/PI489777)SNP_16992 | 374  | T | C | 17  | 15 | -- | --   |
| CakTC32663 | Ca(ICCV2/PI489777)SNP_16993 | 1521 | G | C | 5   | 3  | -- | --   |
|            | Ca(ICCV2/PI489777)SNP_16994 | 1539 | T | C | 5   | 4  | -- | --   |
| CakTC23705 | Ca(ICCV2/PI489777)SNP_16995 | 398  | A | C | 40  | 9  | -- | --   |
|            | Ca(ICCV2/PI489777)SNP_16996 | 439  | T | G | 40  | 10 | -- | --   |
|            | Ca(ICCV2/PI489777)SNP_16997 | 592  | G | A | 26  | 18 | -- | --   |
|            | Ca(ICCV2/PI489777)SNP_16998 | 676  | G | A | 32  | 21 | -- | --   |
|            | Ca(ICCV2/PI489777)SNP_16999 | 742  | T | G | 31  | 16 | -- | --   |
|            | Ca(ICCV2/PI489777)SNP_17000 | 952  | A | G | 25  | 15 | -- | --   |
|            | Ca(ICCV2/PI489777)SNP_17001 | 1038 | G | A | 30  | 15 | -- | --   |
| CakTC29911 | Ca(ICCV2/PI489777)SNP_17002 | 559  | G | A | 5   | 4  | -- | --   |
|            | Ca(ICCV2/PI489777)SNP_17003 | 1904 | C | T | 5   | 6  | -- | --   |
| CakTC25553 | Ca(ICCV2/PI489777)SNP_17004 | 799  | A | C | 3   | 4  | -- | --   |
| CakTC36920 | Ca(ICCV2/PI489777)SNP_17005 | 1475 | G | A | 13  | 11 | -- | PHD  |
|            | Ca(ICCV2/PI489777)SNP_17006 | 1499 | A | G | 10  | 12 | -- | PHD  |
|            | Ca(ICCV2/PI489777)SNP_17007 | 1607 | G | A | 13  | 12 | -- | PHD  |
|            | Ca(ICCV2/PI489777)SNP_17008 | 2399 | G | A | 10  | 13 | -- | PHD  |
|            | Ca(ICCV2/PI489777)SNP_17009 | 2852 | C | G | 12  | 9  | -- | PHD  |
|            | Ca(ICCV2/PI489777)SNP_17010 | 3263 | G | A | 18  | 10 | -- | PHD  |
|            | Ca(ICCV2/PI489777)SNP_17011 | 4828 | C | T | 5   | 11 | -- | PHD  |
|            | Ca(ICCV2/PI489777)SNP_17012 | 4848 | T | G | 6   | 12 | -- | PHD  |
| CakTC42344 | Ca(ICCV2/PI489777)SNP_17013 | 284  | A | G | 22  | 6  | -- | --   |
|            | Ca(ICCV2/PI489777)SNP_17014 | 872  | C | T | 29  | 8  | -- | --   |
| CakTC35220 | Ca(ICCV2/PI489777)SNP_17015 | 894  | C | A | 16  | 16 | -- | --   |

|            |                            |      |   |   |     |    |           |      |
|------------|----------------------------|------|---|---|-----|----|-----------|------|
|            | Ca(ICC2/PI489777)SNP_17016 | 1002 | T | C | 23  | 14 | --        | --   |
|            | Ca(ICC2/PI489777)SNP_17017 | 1257 | A | G | 15  | 5  | --        | --   |
| CakTC29895 | Ca(ICC2/PI489777)SNP_17018 | 148  | T | C | 6   | 6  | --        | --   |
|            | Ca(ICC2/PI489777)SNP_17019 | 211  | G | C | 9   | 8  | --        | --   |
|            | Ca(ICC2/PI489777)SNP_17020 | 432  | C | T | 11  | 10 | --        | --   |
|            | Ca(ICC2/PI489777)SNP_17021 | 1069 | T | C | 16  | 7  | --        | --   |
|            | Ca(ICC2/PI489777)SNP_17022 | 1905 | G | A | 8   | 7  | --        | --   |
|            | Ca(ICC2/PI489777)SNP_17023 | 2511 | C | T | 13  | 12 | --        | --   |
|            | Ca(ICC2/PI489777)SNP_17024 | 2618 | C | T | 16  | 15 | --        | --   |
|            | Ca(ICC2/PI489777)SNP_17025 | 2774 | G | A | 12  | 15 | --        | --   |
|            | Ca(ICC2/PI489777)SNP_17026 | 3079 | C | T | 5   | 3  | --        | --   |
| CakTC23820 | Ca(ICC2/PI489777)SNP_17027 | 739  | C | T | 38  | 23 | --        | --   |
|            | Ca(ICC2/PI489777)SNP_17028 | 862  | T | C | 59  | 35 | --        | --   |
| CakTC24926 | Ca(ICC2/PI489777)SNP_17029 | 106  | T | A | 16  | 9  | --        | --   |
|            | Ca(ICC2/PI489777)SNP_17030 | 204  | T | C | 17  | 10 | --        | --   |
|            | Ca(ICC2/PI489777)SNP_17031 | 245  | T | C | 22  | 10 | --        | --   |
|            | Ca(ICC2/PI489777)SNP_17032 | 1158 | C | T | 17  | 7  | --        | --   |
|            | Ca(ICC2/PI489777)SNP_17033 | 1444 | A | G | 21  | 9  | --        | --   |
|            | Ca(ICC2/PI489777)SNP_17034 | 1461 | T | C | 20  | 9  | --        | --   |
|            | Ca(ICC2/PI489777)SNP_17035 | 1483 | G | A | 19  | 9  | --        | --   |
|            | Ca(ICC2/PI489777)SNP_17036 | 1499 | C | T | 18  | 9  | --        | --   |
| CakTC34534 | Ca(ICC2/PI489777)SNP_17037 | 332  | T | C | 38  | 19 | --        | --   |
| CakTC08592 | Ca(ICC2/PI489777)SNP_17038 | 203  | G | A | 6   | 3  | --        | --   |
|            | Ca(ICC2/PI489777)SNP_17039 | 218  | G | A | 5   | 3  | --        | --   |
|            | Ca(ICC2/PI489777)SNP_17040 | 374  | G | A | 8   | 5  | --        | --   |
|            | Ca(ICC2/PI489777)SNP_17041 | 401  | G | A | 9   | 3  | --        | --   |
|            | Ca(ICC2/PI489777)SNP_17042 | 451  | T | A | 12  | 4  | --        | --   |
|            | Ca(ICC2/PI489777)SNP_17043 | 461  | G | A | 12  | 4  | --        | --   |
|            | Ca(ICC2/PI489777)SNP_17044 | 479  | A | T | 12  | 4  | --        | --   |
|            | Ca(ICC2/PI489777)SNP_17045 | 550  | G | C | 11  | 3  | --        | --   |
| CakTC29146 | Ca(ICC2/PI489777)SNP_17046 | 468  | C | T | 11  | 5  | --        | --   |
|            | Ca(ICC2/PI489777)SNP_17047 | 675  | G | A | 5   | 4  | --        | --   |
| CakTC41833 | Ca(ICC2/PI489777)SNP_17048 | 465  | A | G | 8   | 14 | --        | --   |
|            | Ca(ICC2/PI489777)SNP_17049 | 493  | A | G | 7   | 15 | --        | --   |
| CakTC20209 | Ca(ICC2/PI489777)SNP_17050 | 137  | G | A | 3   | 3  | Young_pod | --   |
| CakTC24949 | Ca(ICC2/PI489777)SNP_17051 | 62   | G | T | 3   | 4  | --        | --   |
|            | Ca(ICC2/PI489777)SNP_17052 | 63   | C | T | 3   | 4  | --        | --   |
|            | Ca(ICC2/PI489777)SNP_17053 | 1588 | T | A | 12  | 10 | --        | --   |
|            | Ca(ICC2/PI489777)SNP_17054 | 1599 | G | A | 13  | 10 | --        | --   |
|            | Ca(ICC2/PI489777)SNP_17055 | 1628 | T | A | 11  | 10 | --        | --   |
| CakTC35286 | Ca(ICC2/PI489777)SNP_17056 | 1427 | G | A | 14  | 10 | --        | --   |
|            | Ca(ICC2/PI489777)SNP_17057 | 1724 | G | A | 7   | 10 | --        | --   |
|            | Ca(ICC2/PI489777)SNP_17058 | 1736 | T | G | 8   | 10 | --        | --   |
|            | Ca(ICC2/PI489777)SNP_17059 | 2075 | G | A | 9   | 4  | --        | --   |
|            | Ca(ICC2/PI489777)SNP_17060 | 2249 | A | G | 10  | 7  | --        | --   |
|            | Ca(ICC2/PI489777)SNP_17061 | 3116 | G | A | 11  | 7  | --        | --   |
| CakTC25101 | Ca(ICC2/PI489777)SNP_17062 | 250  | A | G | 8   | 3  | --        | --   |
|            | Ca(ICC2/PI489777)SNP_17063 | 364  | A | G | 14  | 6  | --        | --   |
|            | Ca(ICC2/PI489777)SNP_17064 | 442  | G | A | 18  | 6  | --        | --   |
|            | Ca(ICC2/PI489777)SNP_17065 | 1195 | T | C | 9   | 4  | --        | --   |
|            | Ca(ICC2/PI489777)SNP_17066 | 1418 | A | C | 11  | 4  | --        | --   |
|            | Ca(ICC2/PI489777)SNP_17067 | 1580 | T | C | 9   | 4  | --        | --   |
|            | Ca(ICC2/PI489777)SNP_17068 | 1877 | C | A | 10  | 4  | --        | --   |
|            | Ca(ICC2/PI489777)SNP_17069 | 1973 | G | A | 11  | 3  | --        | --   |
|            | Ca(ICC2/PI489777)SNP_17070 | 2404 | A | G | 15  | 3  | --        | --   |
| CakTC32985 | Ca(ICC2/PI489777)SNP_17071 | 1436 | T | C | 7   | 3  | --        | ARID |
|            | Ca(ICC2/PI489777)SNP_17072 | 1838 | T | C | 8   | 5  | --        | ARID |
| CakTC25693 | Ca(ICC2/PI489777)SNP_17073 | 749  | G | C | 9   | 3  | --        | --   |
| CakTC24586 | Ca(ICC2/PI489777)SNP_17074 | 1464 | T | C | 19  | 24 | --        | --   |
| CakTC31199 | Ca(ICC2/PI489777)SNP_17075 | 306  | A | T | 3   | 6  | --        | --   |
|            | Ca(ICC2/PI489777)SNP_17076 | 344  | G | A | 4   | 6  | --        | --   |
|            | Ca(ICC2/PI489777)SNP_17077 | 566  | C | T | 4   | 6  | --        | --   |
|            | Ca(ICC2/PI489777)SNP_17078 | 757  | A | G | 5   | 3  | --        | --   |
|            | Ca(ICC2/PI489777)SNP_17079 | 842  | C | T | 5   | 3  | --        | --   |
|            | Ca(ICC2/PI489777)SNP_17080 | 941  | G | A | 5   | 3  | --        | --   |
| CakTC38217 | Ca(ICC2/PI489777)SNP_17081 | 996  | T | A | 8   | 12 | --        | --   |
|            | Ca(ICC2/PI489777)SNP_17082 | 1067 | C | T | 8   | 11 | --        | --   |
| CakTC23360 | Ca(ICC2/PI489777)SNP_17083 | 1378 | A | T | 7   | 6  | --        | --   |
| CakTC37691 | Ca(ICC2/PI489777)SNP_17084 | 680  | T | C | 122 | 61 | --        | --   |
|            | Ca(ICC2/PI489777)SNP_17085 | 993  | G | A | 38  | 33 | --        | --   |
|            | Ca(ICC2/PI489777)SNP_17086 | 1037 | C | T | 40  | 33 | --        | --   |
| CakTC42174 | Ca(ICC2/PI489777)SNP_17087 | 412  | C | T | 16  | 13 | --        | --   |
| CakTC23434 | Ca(ICC2/PI489777)SNP_17088 | 302  | T | C | 14  | 3  | Young_pod | --   |
|            | Ca(ICC2/PI489777)SNP_17089 | 328  | G | C | 12  | 4  | Young_pod | --   |

|            |                            |      |   |   |    |    |           |       |
|------------|----------------------------|------|---|---|----|----|-----------|-------|
| CakTC23518 | Ca(ICC2/PI489777)SNP_17090 | 607  | A | G | 3  | 4  | --        | --    |
| CakTC28166 | Ca(ICC2/PI489777)SNP_17091 | 1072 | G | C | 3  | 5  | --        | --    |
|            | Ca(ICC2/PI489777)SNP_17092 | 2055 | C | G | 5  | 3  | --        | --    |
| CakTC42170 | Ca(ICC2/PI489777)SNP_17093 | 287  | G | T | 14 | 11 | --        | --    |
|            | Ca(ICC2/PI489777)SNP_17094 | 289  | T | A | 13 | 11 | --        | --    |
|            | Ca(ICC2/PI489777)SNP_17095 | 304  | C | T | 12 | 11 | --        | --    |
|            | Ca(ICC2/PI489777)SNP_17096 | 985  | G | A | 11 | 6  | --        | --    |
|            | Ca(ICC2/PI489777)SNP_17097 | 1021 | C | T | 10 | 7  | --        | --    |
|            | Ca(ICC2/PI489777)SNP_17098 | 1329 | T | A | 6  | 8  | --        | --    |
|            | Ca(ICC2/PI489777)SNP_17099 | 1540 | A | G | 8  | 10 | --        | --    |
| CakTC26898 | Ca(ICC2/PI489777)SNP_17100 | 328  | T | C | 43 | 31 | --        | --    |
| CakTC11774 | Ca(ICC2/PI489777)SNP_17101 | 660  | A | G | 17 | 4  | --        | --    |
| CakTC29441 | Ca(ICC2/PI489777)SNP_17102 | 1054 | C | T | 5  | 5  | --        | --    |
| CakTC42179 | Ca(ICC2/PI489777)SNP_17103 | 163  | T | A | 9  | 6  | --        | --    |
|            | Ca(ICC2/PI489777)SNP_17104 | 259  | T | A | 16 | 4  | --        | --    |
|            | Ca(ICC2/PI489777)SNP_17105 | 692  | A | G | 16 | 12 | --        | --    |
| CakTC43232 | Ca(ICC2/PI489777)SNP_17106 | 58   | G | A | 21 | 3  | --        | --    |
|            | Ca(ICC2/PI489777)SNP_17107 | 64   | G | C | 22 | 3  | --        | --    |
|            | Ca(ICC2/PI489777)SNP_17108 | 69   | C | T | 22 | 4  | --        | --    |
|            | Ca(ICC2/PI489777)SNP_17109 | 140  | C | T | 38 | 10 | --        | --    |
|            | Ca(ICC2/PI489777)SNP_17110 | 663  | T | G | 17 | 13 | --        | --    |
|            | Ca(ICC2/PI489777)SNP_17111 | 783  | C | T | 8  | 13 | --        | --    |
| CakTC28012 | Ca(ICC2/PI489777)SNP_17112 | 1101 | T | C | 6  | 5  | --        | --    |
|            | Ca(ICC2/PI489777)SNP_17113 | 1107 | A | T | 6  | 5  | --        | --    |
| CakTC39233 | Ca(ICC2/PI489777)SNP_17114 | 556  | T | C | 6  | 3  | --        | --    |
|            | Ca(ICC2/PI489777)SNP_17115 | 1057 | T | A | 9  | 5  | --        | --    |
| CakTC39452 | Ca(ICC2/PI489777)SNP_17116 | 1088 | T | A | 5  | 4  | --        | mTERF |
| CakTC25359 | Ca(ICC2/PI489777)SNP_17117 | 994  | G | A | 38 | 12 | --        | --    |
| CakTC22652 | Ca(ICC2/PI489777)SNP_17118 | 107  | T | C | 5  | 3  | --        | --    |
|            | Ca(ICC2/PI489777)SNP_17119 | 163  | T | C | 7  | 3  | --        | --    |
|            | Ca(ICC2/PI489777)SNP_17120 | 182  | C | T | 8  | 3  | --        | --    |
|            | Ca(ICC2/PI489777)SNP_17121 | 237  | T | A | 10 | 4  | --        | --    |
|            | Ca(ICC2/PI489777)SNP_17122 | 274  | C | G | 9  | 4  | --        | --    |
|            | Ca(ICC2/PI489777)SNP_17123 | 1031 | T | C | 12 | 3  | --        | --    |
|            | Ca(ICC2/PI489777)SNP_17124 | 1040 | G | A | 14 | 3  | --        | --    |
|            | Ca(ICC2/PI489777)SNP_17125 | 1061 | A | G | 15 | 3  | --        | --    |
|            | Ca(ICC2/PI489777)SNP_17126 | 1076 | A | C | 11 | 3  | --        | --    |
|            | Ca(ICC2/PI489777)SNP_17127 | 1184 | G | C | 15 | 4  | --        | --    |
|            | Ca(ICC2/PI489777)SNP_17128 | 1305 | T | C | 16 | 4  | --        | --    |
|            | Ca(ICC2/PI489777)SNP_17129 | 1306 | A | G | 15 | 4  | --        | --    |
|            | Ca(ICC2/PI489777)SNP_17130 | 1363 | T | C | 13 | 3  | --        | --    |
|            | Ca(ICC2/PI489777)SNP_17131 | 1386 | G | A | 14 | 3  | --        | --    |
|            | Ca(ICC2/PI489777)SNP_17132 | 1404 | C | G | 13 | 3  | --        | --    |
| CakTC27857 | Ca(ICC2/PI489777)SNP_17133 | 282  | A | T | 10 | 4  | --        | --    |
|            | Ca(ICC2/PI489777)SNP_17134 | 306  | C | T | 10 | 5  | --        | --    |
|            | Ca(ICC2/PI489777)SNP_17135 | 504  | C | G | 17 | 13 | --        | --    |
|            | Ca(ICC2/PI489777)SNP_17136 | 565  | G | A | 25 | 14 | --        | --    |
|            | Ca(ICC2/PI489777)SNP_17137 | 786  | A | G | 20 | 14 | --        | --    |
|            | Ca(ICC2/PI489777)SNP_17138 | 1448 | G | A | 12 | 3  | --        | --    |
|            | Ca(ICC2/PI489777)SNP_17139 | 3003 | C | T | 14 | 4  | --        | --    |
|            | Ca(ICC2/PI489777)SNP_17140 | 3066 | A | G | 14 | 4  | --        | --    |
|            | Ca(ICC2/PI489777)SNP_17141 | 3249 | A | G | 9  | 4  | --        | --    |
|            | Ca(ICC2/PI489777)SNP_17142 | 3254 | A | G | 8  | 4  | --        | --    |
|            | Ca(ICC2/PI489777)SNP_17143 | 3414 | G | C | 7  | 3  | --        | --    |
|            | Ca(ICC2/PI489777)SNP_17144 | 3529 | T | C | 13 | 4  | --        | --    |
|            | Ca(ICC2/PI489777)SNP_17145 | 3542 | T | G | 13 | 4  | --        | --    |
|            | Ca(ICC2/PI489777)SNP_17146 | 3618 | T | C | 11 | 5  | --        | --    |
|            | Ca(ICC2/PI489777)SNP_17147 | 4083 | A | G | 9  | 4  | --        | --    |
| CakTC08240 | Ca(ICC2/PI489777)SNP_17148 | 1593 | A | G | 3  | 6  | --        | --    |
| CakTC43250 | Ca(ICC2/PI489777)SNP_17149 | 97   | C | A | 15 | 10 | --        | --    |
|            | Ca(ICC2/PI489777)SNP_17150 | 360  | C | T | 12 | 17 | --        | --    |
|            | Ca(ICC2/PI489777)SNP_17151 | 732  | T | C | 6  | 6  | --        | --    |
| CakTC24817 | Ca(ICC2/PI489777)SNP_17152 | 198  | T | A | 6  | 7  | Flower    | bud   |
|            | Ca(ICC2/PI489777)SNP_17153 | 270  | G | A | 6  | 7  | Flower    | bud   |
|            | Ca(ICC2/PI489777)SNP_17154 | 2040 | G | A | 4  | 3  | Flower    | bud   |
| CakTC23410 | Ca(ICC2/PI489777)SNP_17155 | 514  | T | A | 54 | 20 | Young_pod | --    |
| CakTC30912 | Ca(ICC2/PI489777)SNP_17156 | 1371 | A | C | 13 | 13 | --        | TPR   |
|            | Ca(ICC2/PI489777)SNP_17157 | 2584 | G | A | 10 | 17 | --        | TPR   |
| CakTC29422 | Ca(ICC2/PI489777)SNP_17158 | 1575 | A | G | 18 | 4  | --        | --    |
|            | Ca(ICC2/PI489777)SNP_17159 | 1650 | A | G | 25 | 3  | --        | --    |
|            | Ca(ICC2/PI489777)SNP_17160 | 1971 | A | G | 16 | 3  | --        | --    |
| CakTC32673 | Ca(ICC2/PI489777)SNP_17161 | 263  | T | A | 13 | 3  | --        | --    |
|            | Ca(ICC2/PI489777)SNP_17162 | 281  | T | C | 13 | 3  | --        | --    |
|            | Ca(ICC2/PI489777)SNP_17163 | 1730 | G | A | 6  | 10 | --        | --    |



|            |                            |      |   |   |     |    |        |           |
|------------|----------------------------|------|---|---|-----|----|--------|-----------|
|            | Ca(ICC2/PI489777)SNP_17164 | 2139 | G | C | 5   | 6  | --     | --        |
| CakTC14380 | Ca(ICC2/PI489777)SNP_17165 | 428  | G | A | 3   | 3  | --     | --        |
| CakTC23403 | Ca(ICC2/PI489777)SNP_17166 | 4823 | T | C | 37  | 9  | Mature | Leaf      |
| CakTC38482 | Ca(ICC2/PI489777)SNP_17167 | 160  | G | T | 7   | 3  | --     | --        |
|            | Ca(ICC2/PI489777)SNP_17168 | 861  | G | A | 5   | 10 | --     | --        |
| CakTC40734 | Ca(ICC2/PI489777)SNP_17169 | 92   | G | A | 13  | 10 | --     | --        |
|            | Ca(ICC2/PI489777)SNP_17170 | 489  | A | G | 16  | 12 | --     | --        |
| CakTC28319 | Ca(ICC2/PI489777)SNP_17171 | 213  | G | A | 11  | 3  | --     | --        |
|            | Ca(ICC2/PI489777)SNP_17172 | 287  | A | C | 11  | 15 | --     | --        |
| CakTC23629 | Ca(ICC2/PI489777)SNP_17173 | 1049 | C | A | 33  | 46 | --     | --        |
|            | Ca(ICC2/PI489777)SNP_17174 | 4108 | A | G | 15  | 11 | --     | --        |
| CakTC10413 | Ca(ICC2/PI489777)SNP_17175 | 428  | C | T | 7   | 4  | --     | --        |
| CakTC11611 | Ca(ICC2/PI489777)SNP_17176 | 53   | T | G | 3   | 3  | --     | --        |
| CakTC33989 | Ca(ICC2/PI489777)SNP_17177 | 1651 | T | G | 5   | 7  | --     | HB        |
|            | Ca(ICC2/PI489777)SNP_17178 | 1654 | A | G | 6   | 7  | --     | HB        |
|            | Ca(ICC2/PI489777)SNP_17179 | 1773 | T | A | 3   | 5  | --     | HB        |
|            | Ca(ICC2/PI489777)SNP_17180 | 1774 | C | A | 3   | 5  | --     | HB        |
|            | Ca(ICC2/PI489777)SNP_17181 | 1834 | C | T | 3   | 14 | --     | HB        |
|            | Ca(ICC2/PI489777)SNP_17182 | 2166 | G | A | 4   | 9  | --     | HB        |
| CakTC23331 | Ca(ICC2/PI489777)SNP_17183 | 3777 | T | C | 119 | 41 | --     | --        |
|            | Ca(ICC2/PI489777)SNP_17184 | 4137 | T | C | 115 | 52 | --     | --        |
|            | Ca(ICC2/PI489777)SNP_17185 | 4965 | A | G | 91  | 40 | --     | --        |
| CakTC22646 | Ca(ICC2/PI489777)SNP_17186 | 1251 | G | A | 17  | 18 | --     | --        |
|            | Ca(ICC2/PI489777)SNP_17187 | 1461 | A | G | 24  | 13 | --     | --        |
|            | Ca(ICC2/PI489777)SNP_17188 | 1986 | A | T | 24  | 22 | --     | --        |
|            | Ca(ICC2/PI489777)SNP_17189 | 2283 | T | C | 27  | 20 | --     | --        |
| CakTC35390 | Ca(ICC2/PI489777)SNP_17190 | 2896 | C | T | 3   | 3  | --     | --        |
| CakTC39504 | Ca(ICC2/PI489777)SNP_17191 | 946  | C | T | 9   | 9  | --     | --        |
| CakTC41031 | Ca(ICC2/PI489777)SNP_17192 | 811  | T | C | 16  | 6  | --     | --        |
|            | Ca(ICC2/PI489777)SNP_17193 | 982  | A | T | 12  | 4  | --     | --        |
|            | Ca(ICC2/PI489777)SNP_17194 | 1069 | G | A | 13  | 4  | --     | --        |
|            | Ca(ICC2/PI489777)SNP_17195 | 1284 | C | A | 19  | 10 | --     | --        |
|            | Ca(ICC2/PI489777)SNP_17196 | 1285 | C | T | 20  | 8  | --     | --        |
|            | Ca(ICC2/PI489777)SNP_17197 | 1642 | T | C | 17  | 19 | --     | --        |
| CakTC42243 | Ca(ICC2/PI489777)SNP_17198 | 1477 | A | T | 6   | 3  | --     | --        |
|            | Ca(ICC2/PI489777)SNP_17199 | 1735 | C | T | 5   | 5  | --     | --        |
|            | Ca(ICC2/PI489777)SNP_17200 | 2528 | T | C | 6   | 3  | --     | --        |
| CakTC24690 | Ca(ICC2/PI489777)SNP_17201 | 711  | G | A | 22  | 8  | --     | --        |
|            | Ca(ICC2/PI489777)SNP_17202 | 821  | T | C | 18  | 7  | --     | --        |
|            | Ca(ICC2/PI489777)SNP_17203 | 928  | A | G | 3   | 14 | --     | --        |
| CakTC00704 | Ca(ICC2/PI489777)SNP_17204 | 308  | A | G | 3   | 4  | --     | --        |
|            | Ca(ICC2/PI489777)SNP_17205 | 567  | G | T | 4   | 4  | --     | --        |
|            | Ca(ICC2/PI489777)SNP_17206 | 599  | C | A | 3   | 10 | --     | --        |
| CakTC22630 | Ca(ICC2/PI489777)SNP_17207 | 1946 | T | C | 4   | 3  | --     | --        |
|            | Ca(ICC2/PI489777)SNP_17208 | 2003 | T | C | 3   | 3  | --     | --        |
| CakTC29476 | Ca(ICC2/PI489777)SNP_17209 | 355  | T | C | 4   | 15 | Root   | --        |
|            | Ca(ICC2/PI489777)SNP_17210 | 809  | C | T | 5   | 12 | Root   | --        |
|            | Ca(ICC2/PI489777)SNP_17211 | 1236 | C | T | 3   | 4  | Root   | --        |
| CakTC36746 | Ca(ICC2/PI489777)SNP_17212 | 2253 | C | A | 22  | 19 | --     | --        |
|            | Ca(ICC2/PI489777)SNP_17213 | 3090 | T | C | 19  | 10 | --     | --        |
|            | Ca(ICC2/PI489777)SNP_17214 | 3549 | C | A | 10  | 7  | --     | --        |
| CakTC15258 | Ca(ICC2/PI489777)SNP_17215 | 2734 | A | G | 11  | 3  | --     | CAMTA     |
| CakTC37244 | Ca(ICC2/PI489777)SNP_17216 | 121  | A | G | 17  | 10 | --     | --        |
|            | Ca(ICC2/PI489777)SNP_17217 | 580  | T | C | 22  | 10 | --     | --        |
| CakTC42889 | Ca(ICC2/PI489777)SNP_17218 | 667  | C | G | 11  | 5  | --     | --        |
|            | Ca(ICC2/PI489777)SNP_17219 | 676  | A | G | 11  | 5  | --     | --        |
|            | Ca(ICC2/PI489777)SNP_17220 | 709  | T | C | 8   | 4  | --     | --        |
|            | Ca(ICC2/PI489777)SNP_17221 | 831  | G | A | 3   | 5  | --     | --        |
|            | Ca(ICC2/PI489777)SNP_17222 | 835  | G | A | 4   | 4  | --     | --        |
| CakTC29185 | Ca(ICC2/PI489777)SNP_17223 | 529  | G | A | 8   | 3  | --     | --        |
| CakTC30683 | Ca(ICC2/PI489777)SNP_17224 | 1243 | T | A | 6   | 5  | --     | --        |
| CakTC27147 | Ca(ICC2/PI489777)SNP_17225 | 341  | T | C | 6   | 13 | --     | C2C2-GATA |
|            | Ca(ICC2/PI489777)SNP_17226 | 738  | G | A | 9   | 16 | --     | C2C2-GATA |
|            | Ca(ICC2/PI489777)SNP_17227 | 768  | G | T | 8   | 18 | --     | C2C2-GATA |
| CakTC41381 | Ca(ICC2/PI489777)SNP_17228 | 929  | G | A | 25  | 15 | --     | --        |
|            | Ca(ICC2/PI489777)SNP_17229 | 2119 | A | G | 9   | 7  | --     | --        |
|            | Ca(ICC2/PI489777)SNP_17230 | 2158 | A | G | 10  | 8  | --     | --        |
|            | Ca(ICC2/PI489777)SNP_17231 | 2162 | T | G | 9   | 8  | --     | --        |
|            | Ca(ICC2/PI489777)SNP_17232 | 2296 | A | G | 11  | 7  | --     | --        |
| CakTC34580 | Ca(ICC2/PI489777)SNP_17233 | 1626 | T | C | 6   | 6  | --     | --        |
|            | Ca(ICC2/PI489777)SNP_17234 | 1851 | A | T | 6   | 3  | --     | --        |
| CakTC29800 | Ca(ICC2/PI489777)SNP_17235 | 394  | T | A | 68  | 36 | --     | --        |
|            | Ca(ICC2/PI489777)SNP_17236 | 601  | A | G | 56  | 26 | --     | --        |
| CakTC36956 | Ca(ICC2/PI489777)SNP_17237 | 1748 | T | C | 38  | 26 | --     | --        |

|            |                             |      |   |   |    |    |    |     |
|------------|-----------------------------|------|---|---|----|----|----|-----|
| CakTC10012 | Ca(ICCV2/PI489777)SNP_17238 | 600  | T | C | 10 | 7  | -- | --  |
| CakTC39398 | Ca(ICCV2/PI489777)SNP_17239 | 332  | A | G | 27 | 35 | -- | --  |
|            | Ca(ICCV2/PI489777)SNP_17240 | 959  | G | A | 15 | 16 | -- | --  |
|            | Ca(ICCV2/PI489777)SNP_17241 | 1214 | A | G | 19 | 32 | -- | --  |
|            | Ca(ICCV2/PI489777)SNP_17242 | 1509 | A | G | 7  | 23 | -- | --  |
|            | Ca(ICCV2/PI489777)SNP_17243 | 1584 | G | A | 3  | 5  | -- | --  |
| CakTC30663 | Ca(ICCV2/PI489777)SNP_17244 | 1121 | G | A | 3  | 3  | -- | --  |
|            | Ca(ICCV2/PI489777)SNP_17245 | 1503 | G | T | 3  | 3  | -- | --  |
|            | Ca(ICCV2/PI489777)SNP_17246 | 1507 | T | C | 3  | 3  | -- | --  |
| CakTC39193 | Ca(ICCV2/PI489777)SNP_17247 | 772  | T | C | 5  | 8  | -- | --  |
|            | Ca(ICCV2/PI489777)SNP_17248 | 787  | A | C | 4  | 8  | -- | --  |
|            | Ca(ICCV2/PI489777)SNP_17249 | 892  | T | C | 8  | 8  | -- | --  |
|            | Ca(ICCV2/PI489777)SNP_17250 | 1138 | G | C | 11 | 13 | -- | --  |
| CakTC40576 | Ca(ICCV2/PI489777)SNP_17251 | 720  | G | A | 4  | 4  | -- | --  |
|            | Ca(ICCV2/PI489777)SNP_17252 | 1407 | G | A | 4  | 3  | -- | --  |
| CakTC11049 | Ca(ICCV2/PI489777)SNP_17253 | 901  | G | A | 3  | 3  | -- | SRS |
| CakTC23454 | Ca(ICCV2/PI489777)SNP_17254 | 307  | A | G | 34 | 8  | -- | --  |
|            | Ca(ICCV2/PI489777)SNP_17255 | 453  | T | A | 44 | 7  | -- | --  |
| CakTC40393 | Ca(ICCV2/PI489777)SNP_17256 | 1060 | A | T | 10 | 7  | -- | --  |
|            | Ca(ICCV2/PI489777)SNP_17257 | 1567 | C | T | 19 | 13 | -- | --  |
| CakTC26704 | Ca(ICCV2/PI489777)SNP_17258 | 946  | G | A | 8  | 12 | -- | --  |
| CakTC23806 | Ca(ICCV2/PI489777)SNP_17259 | 373  | T | C | 17 | 5  | -- | --  |
|            | Ca(ICCV2/PI489777)SNP_17260 | 415  | C | T | 19 | 5  | -- | --  |
| CakTC42025 | Ca(ICCV2/PI489777)SNP_17261 | 890  | A | G | 8  | 3  | -- | --  |
| CakTC40338 | Ca(ICCV2/PI489777)SNP_17262 | 769  | T | C | 9  | 5  | -- | --  |
|            | Ca(ICCV2/PI489777)SNP_17263 | 780  | A | G | 9  | 5  | -- | --  |
|            | Ca(ICCV2/PI489777)SNP_17264 | 1390 | A | G | 6  | 3  | -- | --  |
|            | Ca(ICCV2/PI489777)SNP_17265 | 1396 | C | T | 5  | 4  | -- | --  |
| CakTC32416 | Ca(ICCV2/PI489777)SNP_17266 | 123  | G | A | 5  | 5  | -- | --  |
|            | Ca(ICCV2/PI489777)SNP_17267 | 125  | G | A | 4  | 5  | -- | --  |
|            | Ca(ICCV2/PI489777)SNP_17268 | 148  | G | A | 9  | 4  | -- | --  |
|            | Ca(ICCV2/PI489777)SNP_17269 | 388  | G | A | 15 | 8  | -- | --  |
|            | Ca(ICCV2/PI489777)SNP_17270 | 399  | G | A | 25 | 9  | -- | --  |
|            | Ca(ICCV2/PI489777)SNP_17271 | 565  | C | T | 17 | 4  | -- | --  |
| CakTC27892 | Ca(ICCV2/PI489777)SNP_17272 | 1184 | A | T | 3  | 3  | -- | --  |
| CakTC10055 | Ca(ICCV2/PI489777)SNP_17273 | 599  | A | G | 5  | 3  | -- | --  |
| CakTC30797 | Ca(ICCV2/PI489777)SNP_17274 | 263  | T | A | 31 | 21 | -- | --  |
|            | Ca(ICCV2/PI489777)SNP_17275 | 437  | T | C | 24 | 30 | -- | --  |
|            | Ca(ICCV2/PI489777)SNP_17276 | 782  | C | T | 28 | 18 | -- | --  |
| CakTC40469 | Ca(ICCV2/PI489777)SNP_17277 | 426  | A | G | 4  | 6  | -- | --  |
|            | Ca(ICCV2/PI489777)SNP_17278 | 778  | A | G | 15 | 6  | -- | --  |
|            | Ca(ICCV2/PI489777)SNP_17279 | 810  | G | A | 17 | 7  | -- | --  |
| CakTC14761 | Ca(ICCV2/PI489777)SNP_17280 | 92   | A | C | 21 | 12 | -- | --  |
|            | Ca(ICCV2/PI489777)SNP_17281 | 121  | G | T | 38 | 15 | -- | --  |
|            | Ca(ICCV2/PI489777)SNP_17282 | 925  | C | T | 90 | 30 | -- | --  |
| CakTC34341 | Ca(ICCV2/PI489777)SNP_17283 | 1413 | C | T | 3  | 3  | -- | --  |
|            | Ca(ICCV2/PI489777)SNP_17284 | 1431 | A | G | 4  | 5  | -- | --  |
| CakTC34170 | Ca(ICCV2/PI489777)SNP_17285 | 274  | C | T | 31 | 22 | -- | --  |
|            | Ca(ICCV2/PI489777)SNP_17286 | 527  | A | G | 6  | 6  | -- | --  |
|            | Ca(ICCV2/PI489777)SNP_17287 | 553  | G | A | 6  | 4  | -- | --  |
| CakTC40239 | Ca(ICCV2/PI489777)SNP_17288 | 132  | G | C | 11 | 3  | -- | --  |
|            | Ca(ICCV2/PI489777)SNP_17289 | 245  | C | T | 11 | 3  | -- | --  |
|            | Ca(ICCV2/PI489777)SNP_17290 | 990  | T | A | 5  | 8  | -- | --  |
|            | Ca(ICCV2/PI489777)SNP_17291 | 999  | A | G | 5  | 8  | -- | --  |
| CakTC26072 | Ca(ICCV2/PI489777)SNP_17292 | 1461 | G | A | 8  | 10 | -- | --  |
|            | Ca(ICCV2/PI489777)SNP_17293 | 1565 | G | C | 4  | 3  | -- | --  |
|            | Ca(ICCV2/PI489777)SNP_17294 | 1583 | T | G | 4  | 3  | -- | --  |
| CakTC09462 | Ca(ICCV2/PI489777)SNP_17295 | 454  | A | G | 5  | 4  | -- | --  |
| CakTC31163 | Ca(ICCV2/PI489777)SNP_17296 | 1208 | G | A | 4  | 4  | -- | --  |
| CakTC13141 | Ca(ICCV2/PI489777)SNP_17297 | 207  | C | T | 4  | 3  | -- | --  |
|            | Ca(ICCV2/PI489777)SNP_17298 | 247  | G | T | 4  | 3  | -- | --  |
| CakTC34649 | Ca(ICCV2/PI489777)SNP_17299 | 31   | A | T | 10 | 10 | -- | --  |
|            | Ca(ICCV2/PI489777)SNP_17300 | 32   | A | T | 10 | 10 | -- | --  |
|            | Ca(ICCV2/PI489777)SNP_17301 | 185  | G | A | 20 | 15 | -- | --  |
|            | Ca(ICCV2/PI489777)SNP_17302 | 206  | A | T | 19 | 15 | -- | --  |
|            | Ca(ICCV2/PI489777)SNP_17303 | 316  | A | C | 25 | 11 | -- | --  |
|            | Ca(ICCV2/PI489777)SNP_17304 | 340  | C | T | 28 | 13 | -- | --  |
|            | Ca(ICCV2/PI489777)SNP_17305 | 490  | A | T | 28 | 12 | -- | --  |
|            | Ca(ICCV2/PI489777)SNP_17306 | 520  | G | C | 27 | 9  | -- | --  |
|            | Ca(ICCV2/PI489777)SNP_17307 | 598  | C | T | 23 | 7  | -- | --  |
|            | Ca(ICCV2/PI489777)SNP_17308 | 2053 | T | C | 13 | 21 | -- | --  |
|            | Ca(ICCV2/PI489777)SNP_17309 | 2072 | T | C | 9  | 21 | -- | --  |
| CakTC37584 | Ca(ICCV2/PI489777)SNP_17310 | 500  | G | A | 11 | 5  | -- | --  |
| CakTC39053 | Ca(ICCV2/PI489777)SNP_17311 | 468  | A | C | 16 | 8  | -- | --  |

|            |                            |      |   |   |     |     |           |     |
|------------|----------------------------|------|---|---|-----|-----|-----------|-----|
|            | Ca(ICC2/PI489777)SNP_17312 | 522  | C | T | 17  | 15  | --        | --  |
|            | Ca(ICC2/PI489777)SNP_17313 | 560  | A | G | 22  | 17  | --        | --  |
|            | Ca(ICC2/PI489777)SNP_17314 | 578  | G | A | 20  | 16  | --        | --  |
|            | Ca(ICC2/PI489777)SNP_17315 | 590  | C | T | 22  | 16  | --        | --  |
|            | Ca(ICC2/PI489777)SNP_17316 | 602  | C | T | 23  | 18  | --        | --  |
|            | Ca(ICC2/PI489777)SNP_17317 | 697  | C | G | 17  | 24  | --        | --  |
|            | Ca(ICC2/PI489777)SNP_17318 | 719  | A | G | 16  | 26  | --        | --  |
|            | Ca(ICC2/PI489777)SNP_17319 | 947  | T | C | 12  | 23  | --        | --  |
|            | Ca(ICC2/PI489777)SNP_17320 | 1367 | A | G | 8   | 22  | --        | --  |
| CakTC35438 | Ca(ICC2/PI489777)SNP_17321 | 624  | C | T | 18  | 7   | --        | C3H |
|            | Ca(ICC2/PI489777)SNP_17322 | 1286 | C | A | 32  | 9   | --        | C3H |
|            | Ca(ICC2/PI489777)SNP_17323 | 1477 | G | A | 32  | 5   | --        | C3H |
|            | Ca(ICC2/PI489777)SNP_17324 | 2815 | A | G | 12  | 4   | --        | C3H |
|            | Ca(ICC2/PI489777)SNP_17325 | 3033 | T | G | 9   | 4   | --        | C3H |
|            | Ca(ICC2/PI489777)SNP_17326 | 3909 | G | T | 3   | 7   | --        | C3H |
| CakTC29080 | Ca(ICC2/PI489777)SNP_17327 | 507  | T | C | 154 | 84  | --        | --  |
| CakTC30469 | Ca(ICC2/PI489777)SNP_17328 | 217  | C | T | 6   | 4   | --        | --  |
|            | Ca(ICC2/PI489777)SNP_17329 | 420  | G | A | 10  | 8   | --        | --  |
|            | Ca(ICC2/PI489777)SNP_17330 | 476  | C | A | 10  | 5   | --        | --  |
|            | Ca(ICC2/PI489777)SNP_17331 | 489  | G | A | 10  | 5   | --        | --  |
|            | Ca(ICC2/PI489777)SNP_17332 | 1086 | A | G | 3   | 9   | --        | --  |
|            | Ca(ICC2/PI489777)SNP_17333 | 3150 | A | T | 17  | 10  | --        | --  |
|            | Ca(ICC2/PI489777)SNP_17334 | 3183 | A | C | 18  | 9   | --        | --  |
|            | Ca(ICC2/PI489777)SNP_17335 | 3198 | T | C | 18  | 10  | --        | --  |
|            | Ca(ICC2/PI489777)SNP_17336 | 3408 | G | A | 6   | 5   | --        | --  |
|            | Ca(ICC2/PI489777)SNP_17337 | 3550 | A | T | 10  | 3   | --        | --  |
| CakTC24151 | Ca(ICC2/PI489777)SNP_17338 | 152  | C | T | 26  | 4   | Shoot     | --  |
|            | Ca(ICC2/PI489777)SNP_17339 | 189  | T | C | 29  | 4   | Shoot     | --  |
|            | Ca(ICC2/PI489777)SNP_17340 | 251  | T | G | 26  | 4   | Shoot     | --  |
|            | Ca(ICC2/PI489777)SNP_17341 | 357  | C | A | 7   | 4   | Shoot     | --  |
| CakTC23059 | Ca(ICC2/PI489777)SNP_17342 | 455  | T | A | 129 | 107 | Young_pod | --  |
|            | Ca(ICC2/PI489777)SNP_17343 | 947  | C | T | 107 | 77  | Young_pod | --  |
| CakTC13135 | Ca(ICC2/PI489777)SNP_17344 | 542  | A | G | 6   | 6   | --        | --  |
| CakTC31167 | Ca(ICC2/PI489777)SNP_17345 | 1352 | C | T | 53  | 8   | --        | --  |
|            | Ca(ICC2/PI489777)SNP_17346 | 1917 | G | A | 32  | 10  | --        | --  |
|            | Ca(ICC2/PI489777)SNP_17347 | 2130 | C | T | 42  | 13  | --        | --  |
|            | Ca(ICC2/PI489777)SNP_17348 | 2268 | T | C | 46  | 15  | --        | --  |
|            | Ca(ICC2/PI489777)SNP_17349 | 2505 | T | G | 25  | 7   | --        | --  |
|            | Ca(ICC2/PI489777)SNP_17350 | 2556 | A | T | 19  | 5   | --        | --  |
|            | Ca(ICC2/PI489777)SNP_17351 | 2580 | T | C | 14  | 6   | --        | --  |
|            | Ca(ICC2/PI489777)SNP_17352 | 2874 | C | T | 15  | 10  | --        | --  |
|            | Ca(ICC2/PI489777)SNP_17353 | 2904 | G | T | 16  | 9   | --        | --  |
| CakTC27602 | Ca(ICC2/PI489777)SNP_17354 | 150  | T | A | 5   | 3   | Shoot     | --  |
|            | Ca(ICC2/PI489777)SNP_17355 | 222  | A | T | 5   | 4   | Shoot     | --  |
|            | Ca(ICC2/PI489777)SNP_17356 | 387  | T | C | 5   | 8   | Shoot     | --  |
| CakTC41559 | Ca(ICC2/PI489777)SNP_17357 | 74   | C | G | 11  | 4   | --        | --  |
| CakTC11462 | Ca(ICC2/PI489777)SNP_17358 | 576  | A | G | 4   | 4   | --        | --  |
|            | Ca(ICC2/PI489777)SNP_17359 | 972  | C | G | 6   | 3   | --        | --  |
|            | Ca(ICC2/PI489777)SNP_17360 | 984  | C | T | 5   | 3   | --        | --  |
|            | Ca(ICC2/PI489777)SNP_17361 | 1373 | T | A | 4   | 3   | --        | --  |
| CakTC12500 | Ca(ICC2/PI489777)SNP_17362 | 34   | T | C | 33  | 5   | --        | --  |
|            | Ca(ICC2/PI489777)SNP_17363 | 80   | A | G | 34  | 7   | --        | --  |
| CakTC12163 | Ca(ICC2/PI489777)SNP_17364 | 235  | A | G | 15  | 4   | --        | --  |
|            | Ca(ICC2/PI489777)SNP_17365 | 344  | T | A | 16  | 4   | --        | --  |
| CakTC34350 | Ca(ICC2/PI489777)SNP_17366 | 281  | G | A | 8   | 9   | --        | --  |
|            | Ca(ICC2/PI489777)SNP_17367 | 1866 | G | T | 6   | 3   | --        | --  |
|            | Ca(ICC2/PI489777)SNP_17368 | 1898 | T | C | 8   | 3   | --        | --  |
|            | Ca(ICC2/PI489777)SNP_17369 | 2831 | C | T | 13  | 3   | --        | --  |
|            | Ca(ICC2/PI489777)SNP_17370 | 3284 | C | T | 28  | 8   | --        | --  |
|            | Ca(ICC2/PI489777)SNP_17371 | 3767 | T | C | 14  | 6   | --        | --  |
|            | Ca(ICC2/PI489777)SNP_17372 | 3768 | C | A | 14  | 6   | --        | --  |
|            | Ca(ICC2/PI489777)SNP_17373 | 3854 | C | T | 16  | 6   | --        | --  |
|            | Ca(ICC2/PI489777)SNP_17374 | 4050 | T | C | 18  | 3   | --        | --  |
|            | Ca(ICC2/PI489777)SNP_17375 | 4454 | G | A | 16  | 7   | --        | --  |
|            | Ca(ICC2/PI489777)SNP_17376 | 4565 | A | G | 20  | 5   | --        | --  |
|            | Ca(ICC2/PI489777)SNP_17377 | 5229 | A | C | 19  | 4   | --        | --  |
|            | Ca(ICC2/PI489777)SNP_17378 | 5342 | A | T | 18  | 4   | --        | --  |
| CakTC00411 | Ca(ICC2/PI489777)SNP_17379 | 346  | A | T | 20  | 26  | --        | --  |
|            | Ca(ICC2/PI489777)SNP_17380 | 352  | A | G | 22  | 26  | --        | --  |
|            | Ca(ICC2/PI489777)SNP_17381 | 361  | G | A | 22  | 26  | --        | --  |
|            | Ca(ICC2/PI489777)SNP_17382 | 400  | A | G | 24  | 27  | --        | --  |
|            | Ca(ICC2/PI489777)SNP_17383 | 571  | G | A | 19  | 22  | --        | --  |
|            | Ca(ICC2/PI489777)SNP_17384 | 676  | C | T | 18  | 17  | --        | --  |
| CakTC34609 | Ca(ICC2/PI489777)SNP_17385 | 972  | T | C | 8   | 7   | --        | --  |

|            |                            |      |   |   |     |    |       |       |
|------------|----------------------------|------|---|---|-----|----|-------|-------|
|            | Ca(ICC2/PI489777)SNP_17386 | 1795 | T | C | 5   | 8  | --    | --    |
| CakTC39503 | Ca(ICC2/PI489777)SNP_17387 | 1179 | T | C | 3   | 4  | --    | --    |
| CakTC23984 | Ca(ICC2/PI489777)SNP_17388 | 989  | T | C | 38  | 19 | --    | --    |
| CakTC14532 | Ca(ICC2/PI489777)SNP_17389 | 480  | T | C | 11  | 9  | --    | --    |
|            | Ca(ICC2/PI489777)SNP_17390 | 552  | T | C | 13  | 9  | --    | --    |
|            | Ca(ICC2/PI489777)SNP_17391 | 585  | C | T | 11  | 8  | --    | --    |
|            | Ca(ICC2/PI489777)SNP_17392 | 881  | T | C | 16  | 9  | --    | --    |
|            | Ca(ICC2/PI489777)SNP_17393 | 1139 | C | T | 16  | 19 | --    | --    |
| CakTC43046 | Ca(ICC2/PI489777)SNP_17394 | 485  | C | G | 3   | 3  | --    | --    |
|            | Ca(ICC2/PI489777)SNP_17395 | 534  | A | G | 9   | 3  | --    | --    |
| CakTC29409 | Ca(ICC2/PI489777)SNP_17396 | 1803 | G | A | 5   | 4  | --    | --    |
| CakTC32001 | Ca(ICC2/PI489777)SNP_17397 | 80   | T | C | 10  | 16 | --    | --    |
|            | Ca(ICC2/PI489777)SNP_17398 | 923  | A | G | 11  | 18 | --    | --    |
|            | Ca(ICC2/PI489777)SNP_17399 | 2369 | T | C | 14  | 10 | --    | --    |
|            | Ca(ICC2/PI489777)SNP_17400 | 3563 | C | A | 21  | 18 | --    | --    |
|            | Ca(ICC2/PI489777)SNP_17401 | 4147 | C | T | 17  | 16 | --    | --    |
|            | Ca(ICC2/PI489777)SNP_17402 | 4199 | G | A | 16  | 22 | --    | --    |
| CakTC37486 | Ca(ICC2/PI489777)SNP_17403 | 337  | C | T | 10  | 10 | --    | --    |
| CakTC10656 | Ca(ICC2/PI489777)SNP_17404 | 453  | T | C | 4   | 4  | --    | bHLH  |
|            | Ca(ICC2/PI489777)SNP_17405 | 456  | C | T | 4   | 4  | --    | bHLH  |
|            | Ca(ICC2/PI489777)SNP_17406 | 597  | C | A | 3   | 3  | --    | bHLH  |
|            | Ca(ICC2/PI489777)SNP_17407 | 1494 | C | T | 8   | 4  | --    | bHLH  |
|            | Ca(ICC2/PI489777)SNP_17408 | 1683 | T | G | 9   | 5  | --    | bHLH  |
| CakTC09922 | Ca(ICC2/PI489777)SNP_17409 | 560  | T | C | 5   | 4  | --    | --    |
| CakTC27663 | Ca(ICC2/PI489777)SNP_17410 | 1759 | G | A | 9   | 3  | --    | --    |
| CakTC29332 | Ca(ICC2/PI489777)SNP_17411 | 1116 | T | C | 3   | 4  | --    | --    |
|            | Ca(ICC2/PI489777)SNP_17412 | 1719 | G | A | 4   | 3  | --    | --    |
| CakTC31451 | Ca(ICC2/PI489777)SNP_17413 | 1053 | G | C | 12  | 4  | --    | --    |
| CakTC29179 | Ca(ICC2/PI489777)SNP_17414 | 233  | A | G | 20  | 12 | --    | --    |
| CakTC07582 | Ca(ICC2/PI489777)SNP_17415 | 171  | T | C | 4   | 7  | --    | --    |
| CakTC38826 | Ca(ICC2/PI489777)SNP_17416 | 149  | C | T | 51  | 13 | --    | --    |
|            | Ca(ICC2/PI489777)SNP_17417 | 903  | G | A | 91  | 58 | --    | --    |
|            | Ca(ICC2/PI489777)SNP_17418 | 982  | T | C | 98  | 57 | --    | --    |
|            | Ca(ICC2/PI489777)SNP_17419 | 1002 | G | C | 101 | 59 | --    | --    |
| CakTC35082 | Ca(ICC2/PI489777)SNP_17420 | 2107 | A | T | 11  | 3  | --    | mTERF |
| CakTC26279 | Ca(ICC2/PI489777)SNP_17421 | 317  | C | T | 10  | 9  | --    | SET   |
|            | Ca(ICC2/PI489777)SNP_17422 | 677  | C | T | 22  | 7  | --    | SET   |
|            | Ca(ICC2/PI489777)SNP_17423 | 800  | G | A | 11  | 4  | --    | SET   |
|            | Ca(ICC2/PI489777)SNP_17424 | 806  | C | T | 12  | 4  | --    | SET   |
|            | Ca(ICC2/PI489777)SNP_17425 | 1346 | T | A | 12  | 5  | --    | SET   |
|            | Ca(ICC2/PI489777)SNP_17426 | 1421 | C | T | 18  | 6  | --    | SET   |
|            | Ca(ICC2/PI489777)SNP_17427 | 1462 | G | A | 18  | 5  | --    | SET   |
|            | Ca(ICC2/PI489777)SNP_17428 | 1472 | C | G | 18  | 5  | --    | SET   |
|            | Ca(ICC2/PI489777)SNP_17429 | 1588 | A | G | 15  | 3  | --    | SET   |
|            | Ca(ICC2/PI489777)SNP_17430 | 1589 | G | A | 14  | 3  | --    | SET   |
| CakTC29586 | Ca(ICC2/PI489777)SNP_17431 | 392  | A | G | 9   | 4  | --    | --    |
| CakTC11031 | Ca(ICC2/PI489777)SNP_17432 | 262  | T | G | 6   | 8  | --    | --    |
| CakTC40257 | Ca(ICC2/PI489777)SNP_17433 | 115  | C | T | 10  | 3  | --    | --    |
|            | Ca(ICC2/PI489777)SNP_17434 | 146  | G | C | 8   | 3  | --    | --    |
|            | Ca(ICC2/PI489777)SNP_17435 | 933  | C | T | 10  | 11 | --    | --    |
|            | Ca(ICC2/PI489777)SNP_17436 | 1095 | G | A | 20  | 7  | --    | --    |
|            | Ca(ICC2/PI489777)SNP_17437 | 1194 | T | A | 25  | 9  | --    | --    |
|            | Ca(ICC2/PI489777)SNP_17438 | 1217 | G | A | 28  | 8  | --    | --    |
|            | Ca(ICC2/PI489777)SNP_17439 | 1381 | A | T | 15  | 6  | --    | --    |
|            | Ca(ICC2/PI489777)SNP_17440 | 1398 | C | G | 12  | 5  | --    | --    |
|            | Ca(ICC2/PI489777)SNP_17441 | 1540 | G | A | 4   | 3  | --    | --    |
| CakTC29169 | Ca(ICC2/PI489777)SNP_17442 | 1018 | A | G | 5   | 3  | --    | --    |
|            | Ca(ICC2/PI489777)SNP_17443 | 1464 | A | G | 4   | 4  | --    | --    |
| CakTC27181 | Ca(ICC2/PI489777)SNP_17444 | 99   | T | A | 4   | 3  | --    | --    |
|            | Ca(ICC2/PI489777)SNP_17445 | 123  | T | G | 4   | 3  | --    | --    |
|            | Ca(ICC2/PI489777)SNP_17446 | 339  | A | G | 6   | 4  | --    | --    |
| CakTC15150 | Ca(ICC2/PI489777)SNP_17447 | 358  | T | C | 6   | 3  | Shoot | --    |
| CakTC37990 | Ca(ICC2/PI489777)SNP_17448 | 458  | G | A | 10  | 4  | --    | --    |
|            | Ca(ICC2/PI489777)SNP_17449 | 973  | A | T | 13  | 8  | --    | --    |
|            | Ca(ICC2/PI489777)SNP_17450 | 1006 | A | G | 15  | 12 | --    | --    |
| CakTC09183 | Ca(ICC2/PI489777)SNP_17451 | 708  | A | G | 7   | 3  | --    | --    |
|            | Ca(ICC2/PI489777)SNP_17452 | 813  | C | T | 5   | 4  | --    | --    |
|            | Ca(ICC2/PI489777)SNP_17453 | 907  | A | G | 5   | 4  | --    | --    |
|            | Ca(ICC2/PI489777)SNP_17454 | 1062 | A | G | 3   | 3  | --    | --    |
|            | Ca(ICC2/PI489777)SNP_17455 | 1077 | A | G | 3   | 3  | --    | --    |
| CakTC38194 | Ca(ICC2/PI489777)SNP_17456 | 870  | A | G | 7   | 6  | --    | --    |
| CakTC02065 | Ca(ICC2/PI489777)SNP_17457 | 199  | C | T | 3   | 3  | --    | --    |
| CakTC29628 | Ca(ICC2/PI489777)SNP_17458 | 468  | T | A | 3   | 9  | --    | --    |
|            | Ca(ICC2/PI489777)SNP_17459 | 565  | C | T | 3   | 9  | --    | --    |

|            |                             |      |   |   |     |    |       |    |
|------------|-----------------------------|------|---|---|-----|----|-------|----|
|            | Ca(ICCV2/PI489777)SNP_17460 | 1160 | C | G | 7   | 7  | --    | -- |
|            | Ca(ICCV2/PI489777)SNP_17461 | 1205 | T | C | 5   | 5  | --    | -- |
|            | Ca(ICCV2/PI489777)SNP_17462 | 1217 | G | A | 3   | 4  | --    | -- |
|            | Ca(ICCV2/PI489777)SNP_17463 | 1219 | A | C | 4   | 4  | --    | -- |
| CakTC41478 | Ca(ICCV2/PI489777)SNP_17464 | 1185 | G | C | 22  | 11 | --    | -- |
|            | Ca(ICCV2/PI489777)SNP_17465 | 1963 | T | A | 8   | 4  | --    | -- |
|            | Ca(ICCV2/PI489777)SNP_17466 | 2335 | A | T | 7   | 10 | --    | -- |
| CakTC22897 | Ca(ICCV2/PI489777)SNP_17467 | 1626 | A | T | 6   | 7  | --    | -- |
|            | Ca(ICCV2/PI489777)SNP_17468 | 2182 | A | G | 12  | 6  | --    | -- |
|            | Ca(ICCV2/PI489777)SNP_17469 | 2371 | G | A | 9   | 5  | --    | -- |
|            | Ca(ICCV2/PI489777)SNP_17470 | 2973 | A | G | 5   | 3  | --    | -- |
|            | Ca(ICCV2/PI489777)SNP_17471 | 3346 | C | G | 5   | 3  | --    | -- |
|            | Ca(ICCV2/PI489777)SNP_17472 | 3440 | A | T | 5   | 4  | --    | -- |
| CakTC24841 | Ca(ICCV2/PI489777)SNP_17473 | 71   | A | G | 70  | 55 | --    | -- |
|            | Ca(ICCV2/PI489777)SNP_17474 | 87   | G | T | 103 | 80 | --    | -- |
| CakTC40657 | Ca(ICCV2/PI489777)SNP_17475 | 510  | G | A | 6   | 19 | --    | -- |
| CakTC26016 | Ca(ICCV2/PI489777)SNP_17476 | 368  | A | T | 3   | 3  | Shoot | -- |
| CakTC32802 | Ca(ICCV2/PI489777)SNP_17477 | 444  | A | G | 3   | 6  | --    | -- |
| CakTC25576 | Ca(ICCV2/PI489777)SNP_17478 | 1308 | C | T | 4   | 3  | --    | -- |
| CakTC32563 | Ca(ICCV2/PI489777)SNP_17479 | 84   | A | G | 6   | 6  | --    | -- |
|            | Ca(ICCV2/PI489777)SNP_17480 | 87   | T | A | 6   | 5  | --    | -- |
|            | Ca(ICCV2/PI489777)SNP_17481 | 182  | G | T | 9   | 6  | --    | -- |
|            | Ca(ICCV2/PI489777)SNP_17482 | 195  | T | C | 9   | 6  | --    | -- |
|            | Ca(ICCV2/PI489777)SNP_17483 | 311  | C | T | 9   | 5  | --    | -- |
| CakTC27332 | Ca(ICCV2/PI489777)SNP_17484 | 513  | A | C | 26  | 3  | --    | -- |
| CakTC10332 | Ca(ICCV2/PI489777)SNP_17485 | 1716 | G | A | 12  | 3  | --    | -- |
|            | Ca(ICCV2/PI489777)SNP_17486 | 1721 | C | T | 13  | 3  | --    | -- |
| CakTC24697 | Ca(ICCV2/PI489777)SNP_17487 | 1277 | C | T | 4   | 6  | --    | -- |
| CakTC33324 | Ca(ICCV2/PI489777)SNP_17488 | 379  | T | C | 3   | 3  | --    | -- |
| CakTC42875 | Ca(ICCV2/PI489777)SNP_17489 | 622  | C | T | 15  | 23 | --    | -- |
|            | Ca(ICCV2/PI489777)SNP_17490 | 692  | C | T | 14  | 23 | --    | -- |
|            | Ca(ICCV2/PI489777)SNP_17491 | 702  | A | T | 13  | 22 | --    | -- |
| CakTC08355 | Ca(ICCV2/PI489777)SNP_17492 | 402  | A | C | 9   | 4  | --    | -- |
|            | Ca(ICCV2/PI489777)SNP_17493 | 516  | C | A | 3   | 3  | --    | -- |
|            | Ca(ICCV2/PI489777)SNP_17494 | 531  | G | C | 3   | 3  | --    | -- |
|            | Ca(ICCV2/PI489777)SNP_17495 | 600  | T | C | 5   | 3  | --    | -- |
|            | Ca(ICCV2/PI489777)SNP_17496 | 870  | T | G | 4   | 3  | --    | -- |
|            | Ca(ICCV2/PI489777)SNP_17497 | 1040 | C | T | 8   | 4  | --    | -- |
| CakTC33851 | Ca(ICCV2/PI489777)SNP_17498 | 297  | G | A | 3   | 4  | --    | -- |
|            | Ca(ICCV2/PI489777)SNP_17499 | 393  | C | T | 4   | 6  | --    | -- |
|            | Ca(ICCV2/PI489777)SNP_17500 | 490  | T | C | 8   | 6  | --    | -- |
|            | Ca(ICCV2/PI489777)SNP_17501 | 492  | C | T | 9   | 6  | --    | -- |
|            | Ca(ICCV2/PI489777)SNP_17502 | 787  | A | T | 6   | 10 | --    | -- |
|            | Ca(ICCV2/PI489777)SNP_17503 | 1024 | T | C | 14  | 12 | --    | -- |
|            | Ca(ICCV2/PI489777)SNP_17504 | 1747 | A | C | 19  | 3  | --    | -- |
|            | Ca(ICCV2/PI489777)SNP_17505 | 2038 | T | C | 16  | 17 | --    | -- |
| CakTC23472 | Ca(ICCV2/PI489777)SNP_17506 | 177  | C | G | 5   | 9  | --    | -- |
| CakTC28186 | Ca(ICCV2/PI489777)SNP_17507 | 650  | G | T | 15  | 8  | --    | -- |
|            | Ca(ICCV2/PI489777)SNP_17508 | 752  | G | A | 10  | 5  | --    | -- |
| CakTC23685 | Ca(ICCV2/PI489777)SNP_17509 | 298  | T | C | 4   | 9  | --    | -- |
|            | Ca(ICCV2/PI489777)SNP_17510 | 1402 | T | C | 12  | 17 | --    | -- |
|            | Ca(ICCV2/PI489777)SNP_17511 | 1982 | A | T | 18  | 12 | --    | -- |
|            | Ca(ICCV2/PI489777)SNP_17512 | 2146 | A | C | 13  | 10 | --    | -- |
| CakTC34590 | Ca(ICCV2/PI489777)SNP_17513 | 347  | A | C | 24  | 14 | --    | -- |
| CakTC41610 | Ca(ICCV2/PI489777)SNP_17514 | 468  | T | C | 8   | 3  | --    | -- |
| CakTC06402 | Ca(ICCV2/PI489777)SNP_17515 | 430  | A | G | 4   | 3  | --    | -- |
| CakTC15953 | Ca(ICCV2/PI489777)SNP_17516 | 692  | G | A | 3   | 3  | --    | -- |
| CakTC41471 | Ca(ICCV2/PI489777)SNP_17517 | 562  | A | G | 3   | 8  | --    | -- |
| CakTC14390 | Ca(ICCV2/PI489777)SNP_17518 | 272  | T | A | 6   | 3  | --    | -- |
|            | Ca(ICCV2/PI489777)SNP_17519 | 376  | A | T | 7   | 3  | --    | -- |
|            | Ca(ICCV2/PI489777)SNP_17520 | 422  | A | G | 8   | 3  | --    | -- |
|            | Ca(ICCV2/PI489777)SNP_17521 | 448  | C | T | 8   | 3  | --    | -- |
|            | Ca(ICCV2/PI489777)SNP_17522 | 457  | C | T | 8   | 3  | --    | -- |
| CakTC37515 | Ca(ICCV2/PI489777)SNP_17523 | 899  | A | C | 11  | 8  | --    | -- |
|            | Ca(ICCV2/PI489777)SNP_17524 | 959  | T | A | 13  | 7  | --    | -- |
| CakTC27726 | Ca(ICCV2/PI489777)SNP_17525 | 301  | G | T | 3   | 6  | --    | -- |
|            | Ca(ICCV2/PI489777)SNP_17526 | 305  | C | T | 3   | 5  | --    | -- |
| CakTC28978 | Ca(ICCV2/PI489777)SNP_17527 | 785  | C | G | 12  | 10 | --    | -- |
|            | Ca(ICCV2/PI489777)SNP_17528 | 992  | C | T | 14  | 7  | --    | -- |
|            | Ca(ICCV2/PI489777)SNP_17529 | 1154 | C | T | 9   | 7  | --    | -- |
|            | Ca(ICCV2/PI489777)SNP_17530 | 1391 | C | G | 13  | 9  | --    | -- |
|            | Ca(ICCV2/PI489777)SNP_17531 | 1541 | C | T | 14  | 7  | --    | -- |
|            | Ca(ICCV2/PI489777)SNP_17532 | 1862 | A | T | 14  | 4  | --    | -- |
| CakTC37841 | Ca(ICCV2/PI489777)SNP_17533 | 525  | C | T | 13  | 4  | --    | -- |

|            |                            |       |   |   |     |    |      |       |
|------------|----------------------------|-------|---|---|-----|----|------|-------|
|            | Ca(ICC2/PI489777)SNP_17534 | 620   | A | G | 16  | 5  | --   | --    |
|            | Ca(ICC2/PI489777)SNP_17535 | 640   | G | A | 15  | 6  | --   | --    |
|            | Ca(ICC2/PI489777)SNP_17536 | 833   | G | A | 12  | 7  | --   | --    |
|            | Ca(ICC2/PI489777)SNP_17537 | 884   | G | C | 13  | 8  | --   | --    |
|            | Ca(ICC2/PI489777)SNP_17538 | 921   | G | A | 12  | 8  | --   | --    |
| CakTC27345 | Ca(ICC2/PI489777)SNP_17539 | 1804  | A | C | 4   | 7  | --   | --    |
|            | Ca(ICC2/PI489777)SNP_17540 | 1897  | A | C | 8   | 12 | --   | --    |
|            | Ca(ICC2/PI489777)SNP_17541 | 5799  | T | C | 7   | 6  | --   | --    |
|            | Ca(ICC2/PI489777)SNP_17542 | 6015  | G | A | 18  | 11 | --   | --    |
|            | Ca(ICC2/PI489777)SNP_17543 | 6876  | G | A | 9   | 3  | --   | --    |
|            | Ca(ICC2/PI489777)SNP_17544 | 7565  | A | C | 13  | 6  | --   | --    |
|            | Ca(ICC2/PI489777)SNP_17545 | 8145  | A | G | 11  | 4  | --   | --    |
|            | Ca(ICC2/PI489777)SNP_17546 | 9147  | C | T | 20  | 6  | --   | --    |
|            | Ca(ICC2/PI489777)SNP_17547 | 10225 | T | C | 10  | 3  | --   | --    |
|            | Ca(ICC2/PI489777)SNP_17548 | 10467 | T | C | 21  | 10 | --   | --    |
| CakTC11699 | Ca(ICC2/PI489777)SNP_17549 | 520   | T | C | 12  | 20 | --   | --    |
|            | Ca(ICC2/PI489777)SNP_17550 | 1066  | C | T | 23  | 21 | --   | --    |
| CakTC13154 | Ca(ICC2/PI489777)SNP_17551 | 369   | A | G | 57  | 24 | --   | --    |
|            | Ca(ICC2/PI489777)SNP_17552 | 684   | A | G | 9   | 3  | --   | --    |
|            | Ca(ICC2/PI489777)SNP_17553 | 710   | T | C | 9   | 3  | --   | --    |
|            | Ca(ICC2/PI489777)SNP_17554 | 711   | G | A | 9   | 3  | --   | --    |
|            | Ca(ICC2/PI489777)SNP_17555 | 1183  | T | A | 169 | 88 | --   | --    |
| CakTC10374 | Ca(ICC2/PI489777)SNP_17556 | 291   | G | A | 17  | 4  | --   | --    |
|            | Ca(ICC2/PI489777)SNP_17557 | 320   | A | T | 16  | 5  | --   | --    |
|            | Ca(ICC2/PI489777)SNP_17558 | 512   | T | C | 15  | 10 | --   | --    |
| CakTC24799 | Ca(ICC2/PI489777)SNP_17559 | 287   | T | C | 3   | 4  | --   | --    |
| CakTC34116 | Ca(ICC2/PI489777)SNP_17560 | 361   | C | T | 6   | 3  | --   | --    |
|            | Ca(ICC2/PI489777)SNP_17561 | 682   | C | T | 4   | 4  | --   | --    |
|            | Ca(ICC2/PI489777)SNP_17562 | 1644  | T | C | 7   | 5  | --   | --    |
| CakTC29981 | Ca(ICC2/PI489777)SNP_17563 | 903   | T | C | 18  | 3  | --   | --    |
|            | Ca(ICC2/PI489777)SNP_17564 | 1360  | C | A | 12  | 7  | --   | --    |
|            | Ca(ICC2/PI489777)SNP_17565 | 1381  | T | C | 12  | 8  | --   | --    |
|            | Ca(ICC2/PI489777)SNP_17566 | 1589  | T | A | 12  | 3  | --   | --    |
|            | Ca(ICC2/PI489777)SNP_17567 | 2275  | G | A | 11  | 8  | --   | --    |
|            | Ca(ICC2/PI489777)SNP_17568 | 2314  | C | T | 11  | 12 | --   | --    |
| CakTC19409 | Ca(ICC2/PI489777)SNP_17569 | 358   | T | C | 5   | 12 | --   | --    |
|            | Ca(ICC2/PI489777)SNP_17570 | 512   | G | A | 6   | 9  | --   | --    |
|            | Ca(ICC2/PI489777)SNP_17571 | 627   | C | G | 3   | 8  | --   | --    |
| CakTC39037 | Ca(ICC2/PI489777)SNP_17572 | 115   | A | T | 8   | 4  | --   | --    |
|            | Ca(ICC2/PI489777)SNP_17573 | 135   | G | A | 10  | 4  | --   | --    |
|            | Ca(ICC2/PI489777)SNP_17574 | 173   | G | C | 11  | 4  | --   | --    |
|            | Ca(ICC2/PI489777)SNP_17575 | 178   | A | G | 13  | 4  | --   | --    |
|            | Ca(ICC2/PI489777)SNP_17576 | 225   | T | C | 13  | 4  | --   | --    |
|            | Ca(ICC2/PI489777)SNP_17577 | 309   | C | A | 16  | 8  | --   | --    |
|            | Ca(ICC2/PI489777)SNP_17578 | 468   | T | C | 5   | 7  | --   | --    |
|            | Ca(ICC2/PI489777)SNP_17579 | 480   | C | T | 9   | 8  | --   | --    |
|            | Ca(ICC2/PI489777)SNP_17580 | 528   | C | T | 7   | 11 | --   | --    |
|            | Ca(ICC2/PI489777)SNP_17581 | 586   | C | A | 3   | 11 | --   | --    |
|            | Ca(ICC2/PI489777)SNP_17582 | 846   | A | G | 6   | 11 | --   | --    |
|            | Ca(ICC2/PI489777)SNP_17583 | 876   | A | G | 6   | 12 | --   | --    |
|            | Ca(ICC2/PI489777)SNP_17584 | 879   | A | G | 6   | 11 | --   | --    |
|            | Ca(ICC2/PI489777)SNP_17585 | 1038  | T | G | 7   | 6  | --   | --    |
|            | Ca(ICC2/PI489777)SNP_17586 | 1074  | C | A | 6   | 5  | --   | --    |
|            | Ca(ICC2/PI489777)SNP_17587 | 1158  | C | G | 8   | 5  | --   | --    |
| CakTC34263 | Ca(ICC2/PI489777)SNP_17588 | 554   | A | G | 25  | 5  | Root | CCAAT |
| CakTC28437 | Ca(ICC2/PI489777)SNP_17589 | 1331  | T | C | 8   | 10 | --   | --    |
|            | Ca(ICC2/PI489777)SNP_17590 | 1335  | C | T | 9   | 12 | --   | --    |
| CakTC42663 | Ca(ICC2/PI489777)SNP_17591 | 477   | T | G | 6   | 4  | --   | --    |
| CakTC33629 | Ca(ICC2/PI489777)SNP_17592 | 274   | G | C | 4   | 3  | --   | --    |
| CakTC11595 | Ca(ICC2/PI489777)SNP_17593 | 626   | T | C | 75  | 38 | --   | --    |
|            | Ca(ICC2/PI489777)SNP_17594 | 677   | C | A | 73  | 39 | --   | --    |
| CakTC41524 | Ca(ICC2/PI489777)SNP_17595 | 253   | A | G | 9   | 4  | --   | --    |
|            | Ca(ICC2/PI489777)SNP_17596 | 660   | G | T | 12  | 7  | --   | --    |
|            | Ca(ICC2/PI489777)SNP_17597 | 741   | A | G | 12  | 7  | --   | --    |
|            | Ca(ICC2/PI489777)SNP_17598 | 789   | T | C | 12  | 11 | --   | --    |
| CakTC41667 | Ca(ICC2/PI489777)SNP_17599 | 253   | G | C | 48  | 15 | --   | --    |
|            | Ca(ICC2/PI489777)SNP_17600 | 256   | A | G | 47  | 17 | --   | --    |
|            | Ca(ICC2/PI489777)SNP_17601 | 465   | A | G | 36  | 3  | --   | --    |
|            | Ca(ICC2/PI489777)SNP_17602 | 476   | G | C | 35  | 3  | --   | --    |
|            | Ca(ICC2/PI489777)SNP_17603 | 481   | T | G | 27  | 5  | --   | --    |
|            | Ca(ICC2/PI489777)SNP_17604 | 570   | C | G | 26  | 3  | --   | --    |
| CakTC26320 | Ca(ICC2/PI489777)SNP_17605 | 1788  | G | A | 9   | 14 | --   | --    |
| CakTC29874 | Ca(ICC2/PI489777)SNP_17606 | 693   | A | G | 10  | 17 | --   | --    |
|            | Ca(ICC2/PI489777)SNP_17607 | 1005  | C | T | 34  | 12 | --   | --    |

|            |                            |      |   |   |    |     |        |           |
|------------|----------------------------|------|---|---|----|-----|--------|-----------|
|            | Ca(ICC2/PI489777)SNP_17608 | 1122 | G | A | 35 | 11  | --     | --        |
|            | Ca(ICC2/PI489777)SNP_17609 | 1800 | C | T | 28 | 13  | --     | --        |
| CakTC40027 | Ca(ICC2/PI489777)SNP_17610 | 88   | C | T | 25 | 14  | --     | --        |
| CakTC34357 | Ca(ICC2/PI489777)SNP_17611 | 373  | C | T | 13 | 5   | --     | --        |
|            | Ca(ICC2/PI489777)SNP_17612 | 826  | A | T | 8  | 8   | --     | --        |
|            | Ca(ICC2/PI489777)SNP_17613 | 1287 | T | C | 7  | 9   | --     | --        |
|            | Ca(ICC2/PI489777)SNP_17614 | 1819 | G | A | 13 | 4   | --     | --        |
| CakTC27784 | Ca(ICC2/PI489777)SNP_17615 | 198  | G | A | 8  | 3   | --     | TPR       |
|            | Ca(ICC2/PI489777)SNP_17616 | 1483 | C | G | 7  | 5   | --     | TPR       |
|            | Ca(ICC2/PI489777)SNP_17617 | 2482 | T | G | 25 | 7   | --     | TPR       |
| CakTC35706 | Ca(ICC2/PI489777)SNP_17618 | 487  | A | G | 5  | 8   | --     | --        |
| CakTC41365 | Ca(ICC2/PI489777)SNP_17619 | 161  | C | T | 34 | 27  | --     | --        |
| CakTC39856 | Ca(ICC2/PI489777)SNP_17620 | 114  | C | G | 10 | 10  | --     | --        |
|            | Ca(ICC2/PI489777)SNP_17621 | 128  | A | G | 14 | 11  | --     | --        |
|            | Ca(ICC2/PI489777)SNP_17622 | 149  | C | A | 13 | 10  | --     | --        |
|            | Ca(ICC2/PI489777)SNP_17623 | 158  | A | T | 10 | 9   | --     | --        |
|            | Ca(ICC2/PI489777)SNP_17624 | 221  | G | A | 17 | 10  | --     | --        |
|            | Ca(ICC2/PI489777)SNP_17625 | 289  | C | G | 17 | 9   | --     | --        |
|            | Ca(ICC2/PI489777)SNP_17626 | 487  | C | T | 8  | 7   | --     | --        |
|            | Ca(ICC2/PI489777)SNP_17627 | 709  | A | G | 5  | 7   | --     | --        |
|            | Ca(ICC2/PI489777)SNP_17628 | 1051 | G | A | 3  | 3   | --     | --        |
|            | Ca(ICC2/PI489777)SNP_17629 | 1087 | T | A | 3  | 4   | --     | --        |
| CakTC43368 | Ca(ICC2/PI489777)SNP_17630 | 282  | G | A | 8  | 3   | --     | --        |
|            | Ca(ICC2/PI489777)SNP_17631 | 1107 | G | A | 15 | 4   | --     | --        |
|            | Ca(ICC2/PI489777)SNP_17632 | 1110 | A | G | 15 | 4   | --     | --        |
|            | Ca(ICC2/PI489777)SNP_17633 | 1158 | T | C | 10 | 3   | --     | --        |
| CakTC38516 | Ca(ICC2/PI489777)SNP_17634 | 1433 | T | C | 74 | 104 | --     | --        |
| CakTC29546 | Ca(ICC2/PI489777)SNP_17635 | 26   | G | T | 3  | 3   | --     | --        |
| CakTC23722 | Ca(ICC2/PI489777)SNP_17636 | 531  | T | G | 6  | 3   | --     | --        |
| CakTC30078 | Ca(ICC2/PI489777)SNP_17637 | 836  | T | C | 9  | 5   | Mature | Leaf      |
|            | Ca(ICC2/PI489777)SNP_17638 | 923  | T | A | 6  | 3   | Mature | Leaf      |
|            | Ca(ICC2/PI489777)SNP_17639 | 1016 | T | C | 4  | 5   | Mature | Leaf      |
| CakTC42816 | Ca(ICC2/PI489777)SNP_17640 | 125  | C | T | 7  | 3   | --     | --        |
|            | Ca(ICC2/PI489777)SNP_17641 | 149  | T | C | 9  | 3   | --     | --        |
|            | Ca(ICC2/PI489777)SNP_17642 | 180  | T | C | 7  | 3   | --     | --        |
|            | Ca(ICC2/PI489777)SNP_17643 | 245  | A | G | 9  | 3   | --     | --        |
|            | Ca(ICC2/PI489777)SNP_17644 | 302  | A | G | 10 | 3   | --     | --        |
|            | Ca(ICC2/PI489777)SNP_17645 | 319  | C | G | 11 | 3   | --     | --        |
|            | Ca(ICC2/PI489777)SNP_17646 | 349  | A | G | 13 | 3   | --     | --        |
|            | Ca(ICC2/PI489777)SNP_17647 | 1531 | G | C | 3  | 11  | --     | --        |
|            | Ca(ICC2/PI489777)SNP_17648 | 1544 | T | C | 4  | 10  | --     | --        |
|            | Ca(ICC2/PI489777)SNP_17649 | 1613 | A | G | 5  | 14  | --     | --        |
|            | Ca(ICC2/PI489777)SNP_17650 | 1761 | A | C | 4  | 13  | --     | --        |
| CakTC36094 | Ca(ICC2/PI489777)SNP_17651 | 454  | C | G | 13 | 9   | --     | --        |
|            | Ca(ICC2/PI489777)SNP_17652 | 485  | G | A | 8  | 10  | --     | --        |
|            | Ca(ICC2/PI489777)SNP_17653 | 645  | T | C | 11 | 8   | --     | --        |
|            | Ca(ICC2/PI489777)SNP_17654 | 773  | A | G | 7  | 3   | --     | --        |
|            | Ca(ICC2/PI489777)SNP_17655 | 1031 | C | T | 4  | 4   | --     | --        |
|            | Ca(ICC2/PI489777)SNP_17656 | 1284 | G | T | 8  | 8   | --     | --        |
|            | Ca(ICC2/PI489777)SNP_17657 | 1607 | C | T | 5  | 5   | --     | --        |
|            | Ca(ICC2/PI489777)SNP_17658 | 1680 | A | G | 4  | 6   | --     | --        |
|            | Ca(ICC2/PI489777)SNP_17659 | 1750 | G | T | 9  | 5   | --     | --        |
|            | Ca(ICC2/PI489777)SNP_17660 | 1844 | G | A | 8  | 7   | --     | --        |
|            | Ca(ICC2/PI489777)SNP_17661 | 1930 | T | C | 10 | 3   | --     | --        |
|            | Ca(ICC2/PI489777)SNP_17662 | 2088 | A | G | 7  | 13  | --     | --        |
|            | Ca(ICC2/PI489777)SNP_17663 | 2225 | C | A | 7  | 13  | --     | --        |
| CakTC41928 | Ca(ICC2/PI489777)SNP_17664 | 446  | T | C | 3  | 5   | --     | --        |
| CakTC40997 | Ca(ICC2/PI489777)SNP_17665 | 528  | C | G | 12 | 3   | --     | AP2-EREBP |
|            | Ca(ICC2/PI489777)SNP_17666 | 579  | A | T | 16 | 4   | --     | AP2-EREBP |
|            | Ca(ICC2/PI489777)SNP_17667 | 585  | T | A | 10 | 5   | --     | AP2-EREBP |
|            | Ca(ICC2/PI489777)SNP_17668 | 850  | C | T | 14 | 7   | --     | AP2-EREBP |
|            | Ca(ICC2/PI489777)SNP_17669 | 1030 | G | A | 6  | 5   | --     | AP2-EREBP |
| CakTC40359 | Ca(ICC2/PI489777)SNP_17670 | 262  | G | T | 8  | 16  | --     | --        |
|            | Ca(ICC2/PI489777)SNP_17671 | 305  | C | G | 8  | 31  | --     | --        |
|            | Ca(ICC2/PI489777)SNP_17672 | 353  | A | G | 33 | 45  | --     | --        |
|            | Ca(ICC2/PI489777)SNP_17673 | 626  | A | G | 51 | 45  | --     | --        |
| CakTC27186 | Ca(ICC2/PI489777)SNP_17674 | 943  | A | G | 5  | 3   | --     | --        |
|            | Ca(ICC2/PI489777)SNP_17675 | 1301 | A | G | 4  | 5   | --     | --        |
| CakTC27920 | Ca(ICC2/PI489777)SNP_17676 | 278  | C | T | 32 | 26  | --     | --        |
|            | Ca(ICC2/PI489777)SNP_17677 | 279  | A | T | 32 | 26  | --     | --        |
|            | Ca(ICC2/PI489777)SNP_17678 | 1178 | G | T | 25 | 20  | --     | --        |
|            | Ca(ICC2/PI489777)SNP_17679 | 1600 | A | C | 38 | 23  | --     | --        |
|            | Ca(ICC2/PI489777)SNP_17680 | 1612 | G | A | 35 | 23  | --     | --        |
|            | Ca(ICC2/PI489777)SNP_17681 | 2110 | A | G | 33 | 18  | --     | --        |

|            |                            |      |   |   |     |     |           |    |
|------------|----------------------------|------|---|---|-----|-----|-----------|----|
|            | Ca(ICC2/PI489777)SNP_17682 | 2596 | G | A | 36  | 21  | --        | -- |
| CakTC24958 | Ca(ICC2/PI489777)SNP_17683 | 273  | G | C | 115 | 41  | --        | -- |
| CakTC42513 | Ca(ICC2/PI489777)SNP_17684 | 56   | G | C | 15  | 4   | --        | -- |
|            | Ca(ICC2/PI489777)SNP_17685 | 187  | C | A | 23  | 6   | --        | -- |
|            | Ca(ICC2/PI489777)SNP_17686 | 478  | C | T | 25  | 8   | --        | -- |
|            | Ca(ICC2/PI489777)SNP_17687 | 517  | G | A | 23  | 10  | --        | -- |
|            | Ca(ICC2/PI489777)SNP_17688 | 748  | A | G | 36  | 11  | --        | -- |
|            | Ca(ICC2/PI489777)SNP_17689 | 782  | A | G | 36  | 13  | --        | -- |
|            | Ca(ICC2/PI489777)SNP_17690 | 1000 | C | T | 34  | 11  | --        | -- |
| CakTC22311 | Ca(ICC2/PI489777)SNP_17691 | 215  | A | G | 7   | 4   | --        | -- |
|            | Ca(ICC2/PI489777)SNP_17692 | 727  | T | G | 8   | 10  | --        | -- |
|            | Ca(ICC2/PI489777)SNP_17693 | 753  | C | G | 9   | 10  | --        | -- |
| CakTC38111 | Ca(ICC2/PI489777)SNP_17694 | 411  | A | C | 16  | 8   | --        | -- |
| CakTC04213 | Ca(ICC2/PI489777)SNP_17695 | 22   | T | C | 5   | 5   | --        | -- |
| CakTC25723 | Ca(ICC2/PI489777)SNP_17696 | 169  | G | A | 14  | 5   | --        | -- |
| CakTC38325 | Ca(ICC2/PI489777)SNP_17697 | 718  | C | A | 6   | 9   | --        | -- |
|            | Ca(ICC2/PI489777)SNP_17698 | 916  | A | G | 5   | 7   | --        | -- |
|            | Ca(ICC2/PI489777)SNP_17699 | 922  | C | T | 5   | 6   | --        | -- |
|            | Ca(ICC2/PI489777)SNP_17700 | 970  | G | A | 3   | 4   | --        | -- |
| CakTC25395 | Ca(ICC2/PI489777)SNP_17701 | 293  | A | G | 10  | 5   | Young_pod | -- |
|            | Ca(ICC2/PI489777)SNP_17702 | 524  | C | G | 7   | 8   | Young_pod | -- |
|            | Ca(ICC2/PI489777)SNP_17703 | 764  | A | G | 6   | 8   | Young_pod | -- |
| CakTC22362 | Ca(ICC2/PI489777)SNP_17704 | 195  | G | A | 25  | 55  | --        | -- |
|            | Ca(ICC2/PI489777)SNP_17705 | 410  | C | T | 117 | 135 | --        | -- |
|            | Ca(ICC2/PI489777)SNP_17706 | 518  | T | A | 219 | 150 | --        | -- |
|            | Ca(ICC2/PI489777)SNP_17707 | 1410 | T | C | 229 | 146 | --        | -- |
|            | Ca(ICC2/PI489777)SNP_17708 | 1452 | T | G | 243 | 133 | --        | -- |
|            | Ca(ICC2/PI489777)SNP_17709 | 2664 | T | C | 9   | 3   | --        | -- |
|            | Ca(ICC2/PI489777)SNP_17710 | 2960 | A | G | 9   | 5   | --        | -- |
| CakTC23174 | Ca(ICC2/PI489777)SNP_17711 | 1233 | T | C | 6   | 13  | --        | -- |
|            | Ca(ICC2/PI489777)SNP_17712 | 1301 | A | C | 6   | 16  | --        | -- |
|            | Ca(ICC2/PI489777)SNP_17713 | 3369 | A | G | 3   | 8   | --        | -- |
|            | Ca(ICC2/PI489777)SNP_17714 | 3576 | T | C | 9   | 7   | --        | -- |
|            | Ca(ICC2/PI489777)SNP_17715 | 3972 | C | T | 3   | 5   | --        | -- |
| CakTC36068 | Ca(ICC2/PI489777)SNP_17716 | 390  | C | T | 7   | 4   | --        | -- |
|            | Ca(ICC2/PI489777)SNP_17717 | 537  | A | G | 8   | 6   | --        | -- |
|            | Ca(ICC2/PI489777)SNP_17718 | 541  | T | C | 8   | 10  | --        | -- |
|            | Ca(ICC2/PI489777)SNP_17719 | 634  | T | C | 8   | 11  | --        | -- |
|            | Ca(ICC2/PI489777)SNP_17720 | 1009 | G | A | 9   | 5   | --        | -- |
|            | Ca(ICC2/PI489777)SNP_17721 | 1027 | T | C | 8   | 4   | --        | -- |
|            | Ca(ICC2/PI489777)SNP_17722 | 1342 | T | G | 7   | 4   | --        | -- |
|            | Ca(ICC2/PI489777)SNP_17723 | 1600 | A | G | 17  | 8   | --        | -- |
|            | Ca(ICC2/PI489777)SNP_17724 | 2146 | A | G | 8   | 12  | --        | -- |
|            | Ca(ICC2/PI489777)SNP_17725 | 2339 | G | T | 6   | 8   | --        | -- |
|            | Ca(ICC2/PI489777)SNP_17726 | 2461 | T | C | 3   | 6   | --        | -- |
| CakTC42360 | Ca(ICC2/PI489777)SNP_17727 | 103  | G | C | 17  | 17  | --        | -- |
|            | Ca(ICC2/PI489777)SNP_17728 | 156  | A | T | 18  | 17  | --        | -- |
|            | Ca(ICC2/PI489777)SNP_17729 | 159  | A | T | 18  | 17  | --        | -- |
|            | Ca(ICC2/PI489777)SNP_17730 | 456  | C | T | 13  | 13  | --        | -- |
|            | Ca(ICC2/PI489777)SNP_17731 | 543  | T | C | 10  | 10  | --        | -- |
|            | Ca(ICC2/PI489777)SNP_17732 | 642  | G | A | 12  | 7   | --        | -- |
| CakTC30846 | Ca(ICC2/PI489777)SNP_17733 | 86   | C | T | 6   | 3   | --        | -- |
|            | Ca(ICC2/PI489777)SNP_17734 | 143  | C | A | 6   | 5   | --        | -- |
|            | Ca(ICC2/PI489777)SNP_17735 | 179  | T | C | 5   | 3   | --        | -- |
|            | Ca(ICC2/PI489777)SNP_17736 | 332  | T | G | 7   | 5   | --        | -- |
| CakTC34509 | Ca(ICC2/PI489777)SNP_17737 | 201  | G | A | 42  | 34  | --        | -- |
| CakTC12972 | Ca(ICC2/PI489777)SNP_17738 | 1807 | T | C | 4   | 8   | --        | -- |
| CakTC39047 | Ca(ICC2/PI489777)SNP_17739 | 445  | T | G | 15  | 8   | --        | -- |
| CakTC40028 | Ca(ICC2/PI489777)SNP_17740 | 387  | G | T | 11  | 7   | --        | -- |
|            | Ca(ICC2/PI489777)SNP_17741 | 732  | G | A | 11  | 3   | --        | -- |
|            | Ca(ICC2/PI489777)SNP_17742 | 952  | C | T | 11  | 4   | --        | -- |
|            | Ca(ICC2/PI489777)SNP_17743 | 1063 | T | G | 14  | 7   | --        | -- |
|            | Ca(ICC2/PI489777)SNP_17744 | 1358 | A | G | 8   | 5   | --        | -- |
| CakTC38264 | Ca(ICC2/PI489777)SNP_17745 | 378  | A | G | 12  | 6   | --        | -- |
|            | Ca(ICC2/PI489777)SNP_17746 | 433  | A | G | 14  | 6   | --        | -- |
|            | Ca(ICC2/PI489777)SNP_17747 | 525  | C | T | 14  | 6   | --        | -- |
|            | Ca(ICC2/PI489777)SNP_17748 | 567  | T | C | 10  | 5   | --        | -- |
|            | Ca(ICC2/PI489777)SNP_17749 | 1098 | T | C | 4   | 3   | --        | -- |
|            | Ca(ICC2/PI489777)SNP_17750 | 1123 | G | A | 4   | 4   | --        | -- |
|            | Ca(ICC2/PI489777)SNP_17751 | 1225 | T | A | 5   | 3   | --        | -- |
|            | Ca(ICC2/PI489777)SNP_17752 | 1275 | T | C | 5   | 3   | --        | -- |
|            | Ca(ICC2/PI489777)SNP_17753 | 1285 | C | G | 5   | 3   | --        | -- |
| CakTC40448 | Ca(ICC2/PI489777)SNP_17754 | 644  | T | G | 17  | 13  | Root      | -- |
| CakTC38574 | Ca(ICC2/PI489777)SNP_17755 | 167  | A | G | 31  | 9   | --        | -- |



|            |                            |      |   |   |    |    |        |      |
|------------|----------------------------|------|---|---|----|----|--------|------|
|            | Ca(ICC2/PI489777)SNP_17756 | 554  | G | A | 18 | 10 | --     | --   |
|            | Ca(ICC2/PI489777)SNP_17757 | 814  | A | G | 21 | 6  | --     | --   |
| CakTC27457 | Ca(ICC2/PI489777)SNP_17758 | 577  | G | A | 8  | 9  | --     | GNAT |
|            | Ca(ICC2/PI489777)SNP_17759 | 712  | T | A | 10 | 8  | --     | GNAT |
|            | Ca(ICC2/PI489777)SNP_17760 | 739  | T | C | 10 | 8  | --     | GNAT |
|            | Ca(ICC2/PI489777)SNP_17761 | 769  | T | C | 10 | 8  | --     | GNAT |
|            | Ca(ICC2/PI489777)SNP_17762 | 776  | T | C | 9  | 8  | --     | GNAT |
| CakTC12698 | Ca(ICC2/PI489777)SNP_17763 | 612  | T | C | 10 | 7  | --     | --   |
|            | Ca(ICC2/PI489777)SNP_17764 | 947  | A | G | 9  | 6  | --     | --   |
|            | Ca(ICC2/PI489777)SNP_17765 | 1083 | A | G | 11 | 7  | --     | --   |
|            | Ca(ICC2/PI489777)SNP_17766 | 1090 | G | A | 13 | 6  | --     | --   |
|            | Ca(ICC2/PI489777)SNP_17767 | 1250 | G | A | 18 | 8  | --     | --   |
|            | Ca(ICC2/PI489777)SNP_17768 | 1904 | A | G | 21 | 8  | --     | --   |
|            | Ca(ICC2/PI489777)SNP_17769 | 2339 | T | C | 8  | 3  | --     | --   |
| CakTC40232 | Ca(ICC2/PI489777)SNP_17770 | 270  | T | C | 17 | 8  | --     | --   |
|            | Ca(ICC2/PI489777)SNP_17771 | 303  | C | T | 19 | 10 | --     | --   |
|            | Ca(ICC2/PI489777)SNP_17772 | 318  | C | A | 19 | 11 | --     | --   |
|            | Ca(ICC2/PI489777)SNP_17773 | 453  | C | A | 14 | 11 | --     | --   |
|            | Ca(ICC2/PI489777)SNP_17774 | 590  | G | A | 9  | 10 | --     | --   |
|            | Ca(ICC2/PI489777)SNP_17775 | 678  | C | G | 8  | 8  | --     | --   |
|            | Ca(ICC2/PI489777)SNP_17776 | 1106 | C | T | 9  | 5  | --     | --   |
| CakTC26187 | Ca(ICC2/PI489777)SNP_17777 | 255  | C | A | 23 | 16 | --     | bZIP |
|            | Ca(ICC2/PI489777)SNP_17778 | 1143 | C | T | 11 | 13 | --     | bZIP |
| CakTC37817 | Ca(ICC2/PI489777)SNP_17779 | 82   | T | A | 38 | 40 | --     | --   |
|            | Ca(ICC2/PI489777)SNP_17780 | 302  | G | T | 67 | 58 | --     | --   |
| CakTC27884 | Ca(ICC2/PI489777)SNP_17781 | 313  | G | T | 3  | 4  | Flower | bud  |
|            | Ca(ICC2/PI489777)SNP_17782 | 662  | T | G | 5  | 5  | Flower | bud  |
|            | Ca(ICC2/PI489777)SNP_17783 | 684  | G | C | 5  | 5  | Flower | bud  |
|            | Ca(ICC2/PI489777)SNP_17784 | 1226 | T | C | 4  | 3  | Flower | bud  |
|            | Ca(ICC2/PI489777)SNP_17785 | 4131 | T | C | 5  | 4  | Flower | bud  |
| CakTC02598 | Ca(ICC2/PI489777)SNP_17786 | 304  | A | G | 9  | 6  | --     | --   |
|            | Ca(ICC2/PI489777)SNP_17787 | 1481 | T | G | 12 | 7  | --     | --   |
| CakTC36652 | Ca(ICC2/PI489777)SNP_17788 | 343  | G | A | 4  | 6  | --     | ARF  |
|            | Ca(ICC2/PI489777)SNP_17789 | 397  | T | C | 4  | 6  | --     | ARF  |
| CakTC08772 | Ca(ICC2/PI489777)SNP_17790 | 2447 | G | A | 3  | 7  | --     | --   |
| CakTC41436 | Ca(ICC2/PI489777)SNP_17791 | 1943 | T | G | 8  | 3  | --     | --   |
| CakTC10887 | Ca(ICC2/PI489777)SNP_17792 | 293  | T | C | 10 | 8  | --     | --   |
|            | Ca(ICC2/PI489777)SNP_17793 | 311  | T | C | 15 | 10 | --     | --   |
|            | Ca(ICC2/PI489777)SNP_17794 | 470  | A | G | 15 | 12 | --     | --   |
|            | Ca(ICC2/PI489777)SNP_17795 | 492  | T | C | 15 | 11 | --     | --   |
|            | Ca(ICC2/PI489777)SNP_17796 | 509  | A | G | 16 | 12 | --     | --   |
|            | Ca(ICC2/PI489777)SNP_17797 | 517  | C | G | 18 | 12 | --     | --   |
|            | Ca(ICC2/PI489777)SNP_17798 | 519  | G | C | 18 | 12 | --     | --   |
|            | Ca(ICC2/PI489777)SNP_17799 | 548  | A | G | 19 | 10 | --     | --   |
|            | Ca(ICC2/PI489777)SNP_17800 | 560  | C | T | 18 | 11 | --     | --   |
|            | Ca(ICC2/PI489777)SNP_17801 | 725  | A | T | 11 | 7  | --     | --   |
|            | Ca(ICC2/PI489777)SNP_17802 | 948  | A | T | 10 | 13 | --     | --   |
|            | Ca(ICC2/PI489777)SNP_17803 | 1010 | A | G | 10 | 13 | --     | --   |
|            | Ca(ICC2/PI489777)SNP_17804 | 1060 | C | T | 7  | 13 | --     | --   |
|            | Ca(ICC2/PI489777)SNP_17805 | 1181 | T | A | 6  | 5  | --     | --   |
| CakTC42296 | Ca(ICC2/PI489777)SNP_17806 | 806  | A | G | 12 | 5  | --     | --   |
|            | Ca(ICC2/PI489777)SNP_17807 | 1134 | T | C | 12 | 32 | --     | --   |
|            | Ca(ICC2/PI489777)SNP_17808 | 1610 | T | A | 10 | 3  | --     | --   |
| CakTC32529 | Ca(ICC2/PI489777)SNP_17809 | 349  | G | A | 11 | 6  | --     | --   |
|            | Ca(ICC2/PI489777)SNP_17810 | 523  | T | A | 8  | 5  | --     | --   |
|            | Ca(ICC2/PI489777)SNP_17811 | 637  | T | C | 6  | 3  | --     | --   |
|            | Ca(ICC2/PI489777)SNP_17812 | 1168 | G | A | 8  | 3  | --     | --   |
| CakTC42562 | Ca(ICC2/PI489777)SNP_17813 | 866  | G | A | 30 | 26 | --     | --   |
| CakTC07357 | Ca(ICC2/PI489777)SNP_17814 | 1511 | A | G | 6  | 4  | --     | --   |
|            | Ca(ICC2/PI489777)SNP_17815 | 1566 | G | T | 7  | 5  | --     | --   |
|            | Ca(ICC2/PI489777)SNP_17816 | 1613 | A | G | 6  | 4  | --     | --   |
| CakTC29335 | Ca(ICC2/PI489777)SNP_17817 | 2392 | T | C | 9  | 4  | --     | --   |
|            | Ca(ICC2/PI489777)SNP_17818 | 2400 | A | G | 9  | 4  | --     | --   |
|            | Ca(ICC2/PI489777)SNP_17819 | 2417 | G | A | 9  | 4  | --     | --   |
|            | Ca(ICC2/PI489777)SNP_17820 | 2452 | T | C | 8  | 6  | --     | --   |
|            | Ca(ICC2/PI489777)SNP_17821 | 2490 | A | G | 8  | 6  | --     | --   |
|            | Ca(ICC2/PI489777)SNP_17822 | 2492 | G | A | 8  | 6  | --     | --   |
|            | Ca(ICC2/PI489777)SNP_17823 | 2522 | T | C | 11 | 6  | --     | --   |
|            | Ca(ICC2/PI489777)SNP_17824 | 2626 | G | A | 9  | 6  | --     | --   |
|            | Ca(ICC2/PI489777)SNP_17825 | 2640 | G | A | 9  | 6  | --     | --   |
|            | Ca(ICC2/PI489777)SNP_17826 | 2655 | A | T | 8  | 6  | --     | --   |
|            | Ca(ICC2/PI489777)SNP_17827 | 2673 | G | T | 8  | 7  | --     | --   |
|            | Ca(ICC2/PI489777)SNP_17828 | 2705 | G | A | 7  | 7  | --     | --   |
|            | Ca(ICC2/PI489777)SNP_17829 | 2774 | G | T | 5  | 3  | --     | --   |

|            |                            |      |   |   |    |    |    |      |
|------------|----------------------------|------|---|---|----|----|----|------|
|            | Ca(ICC2/PI489777)SNP_17830 | 2798 | G | C | 3  | 3  | -- | --   |
|            | Ca(ICC2/PI489777)SNP_17831 | 2834 | A | G | 3  | 3  | -- | --   |
|            | Ca(ICC2/PI489777)SNP_17832 | 2838 | A | G | 3  | 3  | -- | --   |
|            | Ca(ICC2/PI489777)SNP_17833 | 2870 | T | C | 3  | 5  | -- | --   |
|            | Ca(ICC2/PI489777)SNP_17834 | 2871 | G | A | 3  | 5  | -- | --   |
|            | Ca(ICC2/PI489777)SNP_17835 | 4891 | T | G | 5  | 4  | -- | --   |
|            | Ca(ICC2/PI489777)SNP_17836 | 4893 | T | A | 5  | 4  | -- | --   |
|            | Ca(ICC2/PI489777)SNP_17837 | 4920 | A | G | 4  | 5  | -- | --   |
|            | Ca(ICC2/PI489777)SNP_17838 | 4990 | T | C | 4  | 5  | -- | --   |
| CakTC34133 | Ca(ICC2/PI489777)SNP_17839 | 66   | A | C | 3  | 3  | -- | --   |
|            | Ca(ICC2/PI489777)SNP_17840 | 269  | G | A | 41 | 27 | -- | --   |
| CakTC31081 | Ca(ICC2/PI489777)SNP_17841 | 599  | T | C | 8  | 3  | -- | GRF  |
|            | Ca(ICC2/PI489777)SNP_17842 | 668  | A | G | 10 | 3  | -- | GRF  |
|            | Ca(ICC2/PI489777)SNP_17843 | 689  | T | A | 11 | 3  | -- | GRF  |
|            | Ca(ICC2/PI489777)SNP_17844 | 692  | T | A | 12 | 3  | -- | GRF  |
| CakTC23135 | Ca(ICC2/PI489777)SNP_17845 | 409  | A | C | 3  | 3  | -- | --   |
| CakTC42466 | Ca(ICC2/PI489777)SNP_17846 | 561  | G | T | 16 | 6  | -- | --   |
| CakTC32869 | Ca(ICC2/PI489777)SNP_17847 | 238  | T | C | 37 | 11 | -- | --   |
|            | Ca(ICC2/PI489777)SNP_17848 | 295  | G | A | 36 | 12 | -- | --   |
| CakTC29941 | Ca(ICC2/PI489777)SNP_17849 | 418  | G | C | 7  | 4  | -- | --   |
|            | Ca(ICC2/PI489777)SNP_17850 | 2253 | T | C | 4  | 6  | -- | --   |
|            | Ca(ICC2/PI489777)SNP_17851 | 3246 | C | T | 6  | 3  | -- | --   |
| CakTC41625 | Ca(ICC2/PI489777)SNP_17852 | 219  | A | G | 27 | 25 | -- | --   |
|            | Ca(ICC2/PI489777)SNP_17853 | 372  | T | C | 28 | 30 | -- | --   |
|            | Ca(ICC2/PI489777)SNP_17854 | 516  | T | C | 34 | 21 | -- | --   |
| CakTC11767 | Ca(ICC2/PI489777)SNP_17855 | 214  | G | C | 4  | 3  | -- | --   |
| CakTC41533 | Ca(ICC2/PI489777)SNP_17856 | 713  | A | G | 6  | 4  | -- | --   |
|            | Ca(ICC2/PI489777)SNP_17857 | 946  | C | T | 4  | 5  | -- | --   |
|            | Ca(ICC2/PI489777)SNP_17858 | 1241 | A | G | 6  | 4  | -- | --   |
|            | Ca(ICC2/PI489777)SNP_17859 | 2002 | G | A | 16 | 6  | -- | --   |
|            | Ca(ICC2/PI489777)SNP_17860 | 2035 | T | C | 16 | 5  | -- | --   |
| CakTC03506 | Ca(ICC2/PI489777)SNP_17861 | 509  | C | T | 4  | 7  | -- | --   |
| CakTC30570 | Ca(ICC2/PI489777)SNP_17862 | 333  | C | A | 9  | 5  | -- | bZIP |
|            | Ca(ICC2/PI489777)SNP_17863 | 1005 | C | T | 9  | 5  | -- | bZIP |
|            | Ca(ICC2/PI489777)SNP_17864 | 1062 | C | T | 5  | 4  | -- | bZIP |
| CakTC11760 | Ca(ICC2/PI489777)SNP_17865 | 568  | A | G | 41 | 39 | -- | --   |
|            | Ca(ICC2/PI489777)SNP_17866 | 1153 | G | A | 28 | 20 | -- | --   |
| CakTC27139 | Ca(ICC2/PI489777)SNP_17867 | 15   | T | C | 4  | 6  | -- | --   |
|            | Ca(ICC2/PI489777)SNP_17868 | 29   | G | C | 4  | 6  | -- | --   |
|            | Ca(ICC2/PI489777)SNP_17869 | 351  | C | T | 54 | 32 | -- | --   |
|            | Ca(ICC2/PI489777)SNP_17870 | 840  | G | A | 24 | 16 | -- | --   |
| CakTC25215 | Ca(ICC2/PI489777)SNP_17871 | 559  | A | G | 8  | 15 | -- | --   |
|            | Ca(ICC2/PI489777)SNP_17872 | 702  | A | G | 18 | 9  | -- | --   |
|            | Ca(ICC2/PI489777)SNP_17873 | 1815 | G | C | 11 | 3  | -- | --   |
| CakTC28619 | Ca(ICC2/PI489777)SNP_17874 | 202  | A | G | 14 | 12 | -- | HSF  |
|            | Ca(ICC2/PI489777)SNP_17875 | 250  | C | G | 15 | 11 | -- | HSF  |
|            | Ca(ICC2/PI489777)SNP_17876 | 322  | A | G | 13 | 14 | -- | HSF  |
|            | Ca(ICC2/PI489777)SNP_17877 | 698  | G | A | 9  | 14 | -- | HSF  |
|            | Ca(ICC2/PI489777)SNP_17878 | 873  | A | C | 12 | 19 | -- | HSF  |
|            | Ca(ICC2/PI489777)SNP_17879 | 976  | C | T | 10 | 20 | -- | HSF  |
|            | Ca(ICC2/PI489777)SNP_17880 | 1000 | T | C | 11 | 17 | -- | HSF  |
|            | Ca(ICC2/PI489777)SNP_17881 | 1072 | A | G | 7  | 15 | -- | HSF  |
|            | Ca(ICC2/PI489777)SNP_17882 | 1225 | C | T | 4  | 11 | -- | HSF  |
| CakTC30166 | Ca(ICC2/PI489777)SNP_17883 | 1109 | C | A | 9  | 5  | -- | --   |
|            | Ca(ICC2/PI489777)SNP_17884 | 1331 | G | T | 18 | 12 | -- | --   |
|            | Ca(ICC2/PI489777)SNP_17885 | 1369 | T | G | 14 | 13 | -- | --   |
|            | Ca(ICC2/PI489777)SNP_17886 | 1376 | A | G | 16 | 16 | -- | --   |
|            | Ca(ICC2/PI489777)SNP_17887 | 1526 | G | A | 18 | 16 | -- | --   |
|            | Ca(ICC2/PI489777)SNP_17888 | 1769 | G | A | 8  | 12 | -- | --   |
| CakTC42414 | Ca(ICC2/PI489777)SNP_17889 | 550  | A | G | 12 | 14 | -- | --   |
| CakTC41227 | Ca(ICC2/PI489777)SNP_17890 | 619  | G | A | 36 | 5  | -- | --   |
|            | Ca(ICC2/PI489777)SNP_17891 | 780  | C | T | 25 | 3  | -- | --   |
| CakTC29171 | Ca(ICC2/PI489777)SNP_17892 | 157  | A | C | 4  | 4  | -- | --   |
|            | Ca(ICC2/PI489777)SNP_17893 | 274  | T | A | 4  | 4  | -- | --   |
|            | Ca(ICC2/PI489777)SNP_17894 | 403  | C | T | 5  | 4  | -- | --   |
|            | Ca(ICC2/PI489777)SNP_17895 | 502  | G | C | 4  | 4  | -- | --   |
| CakTC27507 | Ca(ICC2/PI489777)SNP_17896 | 2009 | A | C | 3  | 3  | -- | --   |
|            | Ca(ICC2/PI489777)SNP_17897 | 2015 | A | G | 5  | 3  | -- | --   |
|            | Ca(ICC2/PI489777)SNP_17898 | 2038 | G | A | 5  | 3  | -- | --   |
|            | Ca(ICC2/PI489777)SNP_17899 | 2100 | T | C | 5  | 3  | -- | --   |
|            | Ca(ICC2/PI489777)SNP_17900 | 2103 | T | C | 4  | 3  | -- | --   |
|            | Ca(ICC2/PI489777)SNP_17901 | 2111 | A | C | 4  | 3  | -- | --   |
|            | Ca(ICC2/PI489777)SNP_17902 | 2233 | C | A | 4  | 3  | -- | --   |
|            | Ca(ICC2/PI489777)SNP_17903 | 2308 | T | G | 3  | 3  | -- | --   |

|            |                            |      |   |   |    |    |      |    |
|------------|----------------------------|------|---|---|----|----|------|----|
| CakTC28537 | Ca(ICC2/P1489777)SNP_17904 | 135  | C | A | 6  | 4  | --   | -- |
|            | Ca(ICC2/P1489777)SNP_17905 | 316  | C | T | 22 | 8  | --   | -- |
|            | Ca(ICC2/P1489777)SNP_17906 | 403  | T | C | 33 | 13 | --   | -- |
|            | Ca(ICC2/P1489777)SNP_17907 | 579  | A | G | 31 | 14 | --   | -- |
|            | Ca(ICC2/P1489777)SNP_17908 | 733  | A | G | 42 | 15 | --   | -- |
|            | Ca(ICC2/P1489777)SNP_17909 | 956  | A | C | 38 | 10 | --   | -- |
| CakTC32655 | Ca(ICC2/P1489777)SNP_17910 | 156  | C | T | 6  | 3  | --   | -- |
|            | Ca(ICC2/P1489777)SNP_17911 | 205  | C | T | 7  | 5  | --   | -- |
|            | Ca(ICC2/P1489777)SNP_17912 | 286  | G | T | 11 | 6  | --   | -- |
|            | Ca(ICC2/P1489777)SNP_17913 | 297  | A | G | 12 | 8  | --   | -- |
|            | Ca(ICC2/P1489777)SNP_17914 | 298  | T | A | 12 | 8  | --   | -- |
|            | Ca(ICC2/P1489777)SNP_17915 | 518  | C | T | 6  | 5  | --   | -- |
|            | Ca(ICC2/P1489777)SNP_17916 | 535  | T | C | 5  | 4  | --   | -- |
|            | Ca(ICC2/P1489777)SNP_17917 | 1267 | C | T | 10 | 8  | --   | -- |
|            | Ca(ICC2/P1489777)SNP_17918 | 1973 | A | T | 5  | 10 | --   | -- |
|            | Ca(ICC2/P1489777)SNP_17919 | 2069 | A | G | 5  | 7  | --   | -- |
| CakTC24187 | Ca(ICC2/P1489777)SNP_17920 | 654  | A | C | 5  | 7  | --   | -- |
|            | Ca(ICC2/P1489777)SNP_17921 | 750  | T | G | 9  | 8  | --   | -- |
|            | Ca(ICC2/P1489777)SNP_17922 | 762  | T | G | 11 | 7  | --   | -- |
| CakTC40490 | Ca(ICC2/P1489777)SNP_17923 | 784  | C | T | 5  | 4  | --   | -- |
|            | Ca(ICC2/P1489777)SNP_17924 | 1003 | G | A | 3  | 4  | --   | -- |
| CakTC27958 | Ca(ICC2/P1489777)SNP_17925 | 859  | A | G | 3  | 7  | Root | -- |
|            | Ca(ICC2/P1489777)SNP_17926 | 1349 | G | A | 3  | 4  | Root | -- |
|            | Ca(ICC2/P1489777)SNP_17927 | 1373 | T | C | 3  | 4  | Root | -- |
| CakTC35552 | Ca(ICC2/P1489777)SNP_17928 | 543  | A | G | 8  | 8  | --   | -- |
|            | Ca(ICC2/P1489777)SNP_17929 | 925  | T | C | 4  | 5  | --   | -- |
|            | Ca(ICC2/P1489777)SNP_17930 | 964  | T | C | 9  | 5  | --   | -- |
|            | Ca(ICC2/P1489777)SNP_17931 | 986  | C | T | 9  | 8  | --   | -- |
|            | Ca(ICC2/P1489777)SNP_17932 | 1051 | T | C | 13 | 7  | --   | -- |
|            | Ca(ICC2/P1489777)SNP_17933 | 1327 | T | C | 23 | 6  | --   | -- |
|            | Ca(ICC2/P1489777)SNP_17934 | 2624 | T | C | 14 | 11 | --   | -- |
|            | Ca(ICC2/P1489777)SNP_17935 | 2908 | C | T | 14 | 21 | --   | -- |
|            | Ca(ICC2/P1489777)SNP_17936 | 3274 | A | C | 24 | 13 | --   | -- |
|            | Ca(ICC2/P1489777)SNP_17937 | 3811 | C | T | 14 | 6  | --   | -- |
| CakTC23992 | Ca(ICC2/P1489777)SNP_17938 | 174  | C | A | 39 | 29 | --   | -- |
|            | Ca(ICC2/P1489777)SNP_17939 | 411  | A | T | 37 | 33 | --   | -- |
|            | Ca(ICC2/P1489777)SNP_17940 | 1164 | G | C | 19 | 16 | --   | -- |
|            | Ca(ICC2/P1489777)SNP_17941 | 1809 | C | A | 24 | 26 | --   | -- |
|            | Ca(ICC2/P1489777)SNP_17942 | 1916 | A | G | 25 | 25 | --   | -- |
|            | Ca(ICC2/P1489777)SNP_17943 | 1955 | G | A | 20 | 25 | --   | -- |
|            | Ca(ICC2/P1489777)SNP_17944 | 2060 | A | T | 19 | 25 | --   | -- |
| CakTC40858 | Ca(ICC2/P1489777)SNP_17945 | 1614 | G | C | 17 | 43 | --   | -- |
| CakTC40897 | Ca(ICC2/P1489777)SNP_17946 | 114  | T | C | 15 | 5  | --   | -- |
|            | Ca(ICC2/P1489777)SNP_17947 | 271  | A | G | 25 | 10 | --   | -- |
|            | Ca(ICC2/P1489777)SNP_17948 | 379  | A | G | 29 | 19 | --   | -- |
|            | Ca(ICC2/P1489777)SNP_17949 | 388  | C | A | 29 | 19 | --   | -- |
|            | Ca(ICC2/P1489777)SNP_17950 | 394  | T | A | 25 | 19 | --   | -- |
|            | Ca(ICC2/P1489777)SNP_17951 | 478  | C | G | 44 | 19 | --   | -- |
|            | Ca(ICC2/P1489777)SNP_17952 | 550  | G | A | 39 | 18 | --   | -- |
|            | Ca(ICC2/P1489777)SNP_17953 | 594  | A | G | 37 | 15 | --   | -- |
|            | Ca(ICC2/P1489777)SNP_17954 | 692  | C | T | 35 | 16 | --   | -- |
|            | Ca(ICC2/P1489777)SNP_17955 | 736  | G | A | 34 | 15 | --   | -- |
| CakTC24722 | Ca(ICC2/P1489777)SNP_17956 | 131  | G | T | 9  | 6  | Root | -- |
|            | Ca(ICC2/P1489777)SNP_17957 | 216  | T | A | 10 | 9  | Root | -- |
|            | Ca(ICC2/P1489777)SNP_17958 | 291  | G | C | 21 | 14 | Root | -- |
|            | Ca(ICC2/P1489777)SNP_17959 | 342  | A | G | 66 | 28 | Root | -- |
|            | Ca(ICC2/P1489777)SNP_17960 | 1110 | T | A | 45 | 13 | Root | -- |
|            | Ca(ICC2/P1489777)SNP_17961 | 1125 | C | T | 43 | 16 | Root | -- |
|            | Ca(ICC2/P1489777)SNP_17962 | 1134 | T | A | 41 | 17 | Root | -- |
|            | Ca(ICC2/P1489777)SNP_17963 | 1146 | T | C | 43 | 17 | Root | -- |
|            | Ca(ICC2/P1489777)SNP_17964 | 1245 | A | C | 34 | 14 | Root | -- |
|            | Ca(ICC2/P1489777)SNP_17965 | 1325 | G | T | 32 | 17 | Root | -- |
|            | Ca(ICC2/P1489777)SNP_17966 | 1553 | G | A | 16 | 11 | Root | -- |
| CakTC20354 | Ca(ICC2/P1489777)SNP_17967 | 204  | G | A | 3  | 3  | --   | -- |
| CakTC33015 | Ca(ICC2/P1489777)SNP_17968 | 197  | A | C | 6  | 5  | --   | -- |
| CakTC27840 | Ca(ICC2/P1489777)SNP_17969 | 674  | C | T | 8  | 4  | --   | -- |
| CakTC33107 | Ca(ICC2/P1489777)SNP_17970 | 195  | A | G | 6  | 3  | --   | -- |
|            | Ca(ICC2/P1489777)SNP_17971 | 345  | C | T | 6  | 3  | --   | -- |
|            | Ca(ICC2/P1489777)SNP_17972 | 505  | C | T | 4  | 3  | --   | -- |
| CakTC42130 | Ca(ICC2/P1489777)SNP_17973 | 430  | A | G | 11 | 7  | --   | -- |
|            | Ca(ICC2/P1489777)SNP_17974 | 445  | A | T | 9  | 7  | --   | -- |
|            | Ca(ICC2/P1489777)SNP_17975 | 446  | A | G | 9  | 7  | --   | -- |
|            | Ca(ICC2/P1489777)SNP_17976 | 726  | T | C | 8  | 4  | --   | -- |
| CakTC40526 | Ca(ICC2/P1489777)SNP_17977 | 1802 | T | C | 3  | 3  | --   | -- |

|            |                             |      |   |   |     |    |    |    |
|------------|-----------------------------|------|---|---|-----|----|----|----|
| CakTC11240 | Ca(ICCV2/PI489777)SNP_17978 | 629  | T | A | 33  | 8  | -- | -- |
|            | Ca(ICCV2/PI489777)SNP_17979 | 1763 | T | G | 14  | 8  | -- | -- |
|            | Ca(ICCV2/PI489777)SNP_17980 | 1853 | C | T | 12  | 7  | -- | -- |
|            | Ca(ICCV2/PI489777)SNP_17981 | 1883 | G | A | 13  | 7  | -- | -- |
|            | Ca(ICCV2/PI489777)SNP_17982 | 2024 | G | A | 13  | 5  | -- | -- |
|            | Ca(ICCV2/PI489777)SNP_17983 | 2284 | A | G | 16  | 7  | -- | -- |
|            | Ca(ICCV2/PI489777)SNP_17984 | 2296 | G | A | 17  | 6  | -- | -- |
|            | Ca(ICCV2/PI489777)SNP_17985 | 2331 | C | T | 14  | 8  | -- | -- |
|            | Ca(ICCV2/PI489777)SNP_17986 | 2355 | G | T | 15  | 6  | -- | -- |
|            | Ca(ICCV2/PI489777)SNP_17987 | 2359 | A | G | 15  | 6  | -- | -- |
|            | Ca(ICCV2/PI489777)SNP_17988 | 2485 | G | C | 15  | 6  | -- | -- |
| CakTC33856 | Ca(ICCV2/PI489777)SNP_17989 | 667  | G | T | 5   | 4  | -- | -- |
|            | Ca(ICCV2/PI489777)SNP_17990 | 688  | C | T | 5   | 4  | -- | -- |
|            | Ca(ICCV2/PI489777)SNP_17991 | 754  | T | C | 5   | 4  | -- | -- |
| CakTC41552 | Ca(ICCV2/PI489777)SNP_17992 | 155  | G | C | 4   | 4  | -- | -- |
|            | Ca(ICCV2/PI489777)SNP_17993 | 1165 | T | C | 15  | 4  | -- | -- |
|            | Ca(ICCV2/PI489777)SNP_17994 | 1636 | A | G | 15  | 8  | -- | -- |
|            | Ca(ICCV2/PI489777)SNP_17995 | 1798 | G | A | 20  | 12 | -- | -- |
| CakTC42075 | Ca(ICCV2/PI489777)SNP_17996 | 372  | G | A | 6   | 10 | -- | -- |
|            | Ca(ICCV2/PI489777)SNP_17997 | 485  | C | T | 6   | 7  | -- | -- |
| CakTC32747 | Ca(ICCV2/PI489777)SNP_17998 | 108  | G | A | 3   | 8  | -- | -- |
|            | Ca(ICCV2/PI489777)SNP_17999 | 331  | G | A | 8   | 15 | -- | -- |
|            | Ca(ICCV2/PI489777)SNP_18000 | 1123 | A | G | 6   | 9  | -- | -- |
| CakTC28609 | Ca(ICCV2/PI489777)SNP_18001 | 132  | A | G | 4   | 5  | -- | -- |
| CakTC42433 | Ca(ICCV2/PI489777)SNP_18002 | 1007 | A | C | 20  | 20 | -- | -- |
|            | Ca(ICCV2/PI489777)SNP_18003 | 1145 | G | A | 20  | 17 | -- | -- |
|            | Ca(ICCV2/PI489777)SNP_18004 | 1239 | C | T | 22  | 26 | -- | -- |
|            | Ca(ICCV2/PI489777)SNP_18005 | 1299 | G | T | 15  | 28 | -- | -- |
|            | Ca(ICCV2/PI489777)SNP_18006 | 1300 | A | G | 16  | 28 | -- | -- |
|            | Ca(ICCV2/PI489777)SNP_18007 | 1379 | T | A | 19  | 23 | -- | -- |
|            | Ca(ICCV2/PI489777)SNP_18008 | 1475 | C | T | 16  | 16 | -- | -- |
|            | Ca(ICCV2/PI489777)SNP_18009 | 1514 | G | A | 13  | 14 | -- | -- |
|            | Ca(ICCV2/PI489777)SNP_18010 | 1573 | A | G | 6   | 9  | -- | -- |
|            | Ca(ICCV2/PI489777)SNP_18011 | 1618 | G | A | 5   | 9  | -- | -- |
| CakTC40790 | Ca(ICCV2/PI489777)SNP_18012 | 241  | C | T | 5   | 10 | -- | -- |
| CakTC25451 | Ca(ICCV2/PI489777)SNP_18013 | 481  | T | C | 35  | 11 | -- | -- |
|            | Ca(ICCV2/PI489777)SNP_18014 | 594  | A | T | 37  | 10 | -- | -- |
|            | Ca(ICCV2/PI489777)SNP_18015 | 1044 | T | G | 54  | 22 | -- | -- |
|            | Ca(ICCV2/PI489777)SNP_18016 | 1263 | G | C | 50  | 34 | -- | -- |
|            | Ca(ICCV2/PI489777)SNP_18017 | 1698 | C | T | 41  | 28 | -- | -- |
|            | Ca(ICCV2/PI489777)SNP_18018 | 1856 | T | A | 32  | 19 | -- | -- |
| CakTC38964 | Ca(ICCV2/PI489777)SNP_18019 | 428  | C | T | 106 | 57 | -- | -- |
|            | Ca(ICCV2/PI489777)SNP_18020 | 734  | T | C | 65  | 32 | -- | -- |
| CakTC27938 | Ca(ICCV2/PI489777)SNP_18021 | 775  | C | T | 15  | 23 | -- | -- |
|            | Ca(ICCV2/PI489777)SNP_18022 | 1057 | A | G | 27  | 23 | -- | -- |
| CakTC33926 | Ca(ICCV2/PI489777)SNP_18023 | 270  | G | C | 6   | 9  | -- | -- |
|            | Ca(ICCV2/PI489777)SNP_18024 | 543  | C | T | 3   | 4  | -- | -- |
|            | Ca(ICCV2/PI489777)SNP_18025 | 636  | A | G | 4   | 5  | -- | -- |
|            | Ca(ICCV2/PI489777)SNP_18026 | 702  | A | G | 5   | 7  | -- | -- |
|            | Ca(ICCV2/PI489777)SNP_18027 | 1517 | A | C | 6   | 7  | -- | -- |
|            | Ca(ICCV2/PI489777)SNP_18028 | 1522 | A | G | 6   | 6  | -- | -- |
|            | Ca(ICCV2/PI489777)SNP_18029 | 1528 | A | T | 6   | 7  | -- | -- |
|            | Ca(ICCV2/PI489777)SNP_18030 | 1661 | T | A | 5   | 10 | -- | -- |
| CakTC27321 | Ca(ICCV2/PI489777)SNP_18031 | 153  | A | T | 45  | 36 | -- | -- |
|            | Ca(ICCV2/PI489777)SNP_18032 | 201  | C | A | 50  | 41 | -- | -- |
|            | Ca(ICCV2/PI489777)SNP_18033 | 339  | T | C | 54  | 35 | -- | -- |
|            | Ca(ICCV2/PI489777)SNP_18034 | 387  | T | G | 70  | 41 | -- | -- |
|            | Ca(ICCV2/PI489777)SNP_18035 | 429  | T | C | 72  | 51 | -- | -- |
|            | Ca(ICCV2/PI489777)SNP_18036 | 649  | T | A | 62  | 38 | -- | -- |
|            | Ca(ICCV2/PI489777)SNP_18037 | 1468 | C | T | 10  | 11 | -- | -- |
| CakTC29973 | Ca(ICCV2/PI489777)SNP_18038 | 376  | T | C | 4   | 9  | -- | -- |
|            | Ca(ICCV2/PI489777)SNP_18039 | 697  | T | C | 6   | 14 | -- | -- |
|            | Ca(ICCV2/PI489777)SNP_18040 | 979  | G | A | 9   | 8  | -- | -- |
|            | Ca(ICCV2/PI489777)SNP_18041 | 1544 | G | A | 8   | 9  | -- | -- |
|            | Ca(ICCV2/PI489777)SNP_18042 | 1691 | A | G | 7   | 11 | -- | -- |
|            | Ca(ICCV2/PI489777)SNP_18043 | 2630 | T | C | 4   | 10 | -- | -- |
|            | Ca(ICCV2/PI489777)SNP_18044 | 2674 | G | A | 5   | 9  | -- | -- |
|            | Ca(ICCV2/PI489777)SNP_18045 | 2988 | A | C | 5   | 4  | -- | -- |
| CakTC35443 | Ca(ICCV2/PI489777)SNP_18046 | 119  | C | T | 6   | 4  | -- | -- |
|            | Ca(ICCV2/PI489777)SNP_18047 | 206  | C | A | 7   | 4  | -- | -- |
|            | Ca(ICCV2/PI489777)SNP_18048 | 274  | T | C | 11  | 5  | -- | -- |
|            | Ca(ICCV2/PI489777)SNP_18049 | 408  | G | A | 11  | 4  | -- | -- |
|            | Ca(ICCV2/PI489777)SNP_18050 | 1971 | T | C | 8   | 8  | -- | -- |
|            | Ca(ICCV2/PI489777)SNP_18051 | 3965 | T | A | 9   | 5  | -- | -- |

|            |                            |      |   |   |     |    |        |     |
|------------|----------------------------|------|---|---|-----|----|--------|-----|
|            | Ca(ICC2/PI489777)SNP_18052 | 4004 | C | G | 6   | 6  | --     | --  |
| CakTC41913 | Ca(ICC2/PI489777)SNP_18053 | 96   | C | T | 7   | 5  | --     | --  |
|            | Ca(ICC2/PI489777)SNP_18054 | 199  | G | A | 13  | 5  | --     | --  |
|            | Ca(ICC2/PI489777)SNP_18055 | 394  | G | A | 18  | 13 | --     | --  |
|            | Ca(ICC2/PI489777)SNP_18056 | 430  | A | G | 20  | 14 | --     | --  |
|            | Ca(ICC2/PI489777)SNP_18057 | 1588 | C | T | 34  | 11 | --     | --  |
|            | Ca(ICC2/PI489777)SNP_18058 | 1645 | G | T | 26  | 11 | --     | --  |
|            | Ca(ICC2/PI489777)SNP_18059 | 1663 | G | A | 26  | 11 | --     | --  |
| CakTC33025 | Ca(ICC2/PI489777)SNP_18060 | 684  | C | G | 6   | 5  | Flower | bud |
| CakTC20721 | Ca(ICC2/PI489777)SNP_18061 | 1298 | C | T | 10  | 8  | --     | --  |
|            | Ca(ICC2/PI489777)SNP_18062 | 1346 | C | A | 9   | 9  | --     | --  |
|            | Ca(ICC2/PI489777)SNP_18063 | 2339 | C | T | 9   | 5  | --     | --  |
|            | Ca(ICC2/PI489777)SNP_18064 | 2567 | C | T | 10  | 5  | --     | --  |
|            | Ca(ICC2/PI489777)SNP_18065 | 2656 | G | A | 8   | 4  | --     | --  |
|            | Ca(ICC2/PI489777)SNP_18066 | 3101 | A | T | 17  | 4  | --     | --  |
|            | Ca(ICC2/PI489777)SNP_18067 | 4365 | A | C | 8   | 8  | --     | --  |
| CakTC41335 | Ca(ICC2/PI489777)SNP_18068 | 349  | T | A | 8   | 9  | --     | --  |
| CakTC29081 | Ca(ICC2/PI489777)SNP_18069 | 1391 | G | C | 11  | 3  | --     | --  |
|            | Ca(ICC2/PI489777)SNP_18070 | 1811 | C | G | 7   | 8  | --     | --  |
|            | Ca(ICC2/PI489777)SNP_18071 | 1952 | G | A | 8   | 9  | --     | --  |
|            | Ca(ICC2/PI489777)SNP_18072 | 2267 | G | C | 10  | 4  | --     | --  |
|            | Ca(ICC2/PI489777)SNP_18073 | 2336 | T | C | 10  | 3  | --     | --  |
|            | Ca(ICC2/PI489777)SNP_18074 | 2681 | A | G | 10  | 9  | --     | --  |
| CakTC31309 | Ca(ICC2/PI489777)SNP_18075 | 539  | T | C | 51  | 45 | --     | --  |
|            | Ca(ICC2/PI489777)SNP_18076 | 774  | A | G | 49  | 34 | --     | --  |
|            | Ca(ICC2/PI489777)SNP_18077 | 802  | C | T | 32  | 28 | --     | --  |
| CakTC09896 | Ca(ICC2/PI489777)SNP_18078 | 432  | C | G | 8   | 3  | --     | --  |
| CakTC41656 | Ca(ICC2/PI489777)SNP_18079 | 592  | A | G | 3   | 3  | --     | --  |
|            | Ca(ICC2/PI489777)SNP_18080 | 2284 | A | G | 3   | 3  | --     | --  |
|            | Ca(ICC2/PI489777)SNP_18081 | 2298 | C | T | 3   | 3  | --     | --  |
| CakTC24309 | Ca(ICC2/PI489777)SNP_18082 | 67   | C | T | 10  | 7  | --     | --  |
|            | Ca(ICC2/PI489777)SNP_18083 | 676  | G | A | 16  | 16 | --     | --  |
| CakTC38221 | Ca(ICC2/PI489777)SNP_18084 | 324  | T | C | 14  | 7  | --     | --  |
| CakTC39000 | Ca(ICC2/PI489777)SNP_18085 | 182  | A | T | 3   | 5  | --     | --  |
|            | Ca(ICC2/PI489777)SNP_18086 | 350  | A | T | 3   | 4  | --     | --  |
|            | Ca(ICC2/PI489777)SNP_18087 | 425  | T | C | 5   | 4  | --     | --  |
|            | Ca(ICC2/PI489777)SNP_18088 | 434  | C | T | 6   | 4  | --     | --  |
| CakTC34940 | Ca(ICC2/PI489777)SNP_18089 | 276  | A | T | 5   | 7  | --     | --  |
|            | Ca(ICC2/PI489777)SNP_18090 | 1020 | T | G | 11  | 5  | --     | --  |
|            | Ca(ICC2/PI489777)SNP_18091 | 1290 | T | C | 11  | 8  | --     | --  |
|            | Ca(ICC2/PI489777)SNP_18092 | 1914 | C | T | 16  | 5  | --     | --  |
|            | Ca(ICC2/PI489777)SNP_18093 | 2456 | G | C | 16  | 7  | --     | --  |
| CakTC38771 | Ca(ICC2/PI489777)SNP_18094 | 238  | A | G | 4   | 3  | --     | --  |
| CakTC39783 | Ca(ICC2/PI489777)SNP_18095 | 913  | A | C | 12  | 8  | --     | --  |
|            | Ca(ICC2/PI489777)SNP_18096 | 1144 | A | C | 12  | 4  | --     | --  |
| CakTC27865 | Ca(ICC2/PI489777)SNP_18097 | 613  | A | C | 4   | 3  | --     | --  |
| CakTC25042 | Ca(ICC2/PI489777)SNP_18098 | 295  | T | C | 40  | 18 | --     | --  |
|            | Ca(ICC2/PI489777)SNP_18099 | 1905 | T | C | 148 | 70 | --     | --  |
| CakTC24705 | Ca(ICC2/PI489777)SNP_18100 | 339  | T | A | 8   | 6  | --     | --  |
|            | Ca(ICC2/PI489777)SNP_18101 | 408  | G | A | 11  | 7  | --     | --  |
|            | Ca(ICC2/PI489777)SNP_18102 | 607  | G | C | 9   | 3  | --     | --  |
| CakTC34965 | Ca(ICC2/PI489777)SNP_18103 | 20   | G | C | 3   | 8  | --     | --  |
|            | Ca(ICC2/PI489777)SNP_18104 | 416  | G | T | 4   | 3  | --     | --  |
| CakTC39641 | Ca(ICC2/PI489777)SNP_18105 | 71   | T | A | 3   | 5  | --     | --  |
|            | Ca(ICC2/PI489777)SNP_18106 | 207  | G | T | 6   | 6  | --     | --  |
|            | Ca(ICC2/PI489777)SNP_18107 | 348  | C | A | 8   | 7  | --     | --  |
|            | Ca(ICC2/PI489777)SNP_18108 | 438  | T | G | 14  | 9  | --     | --  |
|            | Ca(ICC2/PI489777)SNP_18109 | 473  | C | T | 16  | 8  | --     | --  |
|            | Ca(ICC2/PI489777)SNP_18110 | 519  | A | C | 14  | 9  | --     | --  |
|            | Ca(ICC2/PI489777)SNP_18111 | 750  | C | T | 9   | 9  | --     | --  |
|            | Ca(ICC2/PI489777)SNP_18112 | 936  | T | G | 6   | 8  | --     | --  |
|            | Ca(ICC2/PI489777)SNP_18113 | 1151 | G | A | 7   | 7  | --     | --  |
|            | Ca(ICC2/PI489777)SNP_18114 | 1169 | G | A | 7   | 7  | --     | --  |
| CakTC30933 | Ca(ICC2/PI489777)SNP_18115 | 176  | A | G | 17  | 11 | --     | --  |
|            | Ca(ICC2/PI489777)SNP_18116 | 726  | T | C | 227 | 51 | --     | --  |
|            | Ca(ICC2/PI489777)SNP_18117 | 1218 | C | A | 129 | 51 | --     | --  |
|            | Ca(ICC2/PI489777)SNP_18118 | 1353 | G | T | 65  | 27 | --     | --  |
| CakTC41132 | Ca(ICC2/PI489777)SNP_18119 | 774  | T | C | 13  | 10 | --     | --  |
|            | Ca(ICC2/PI489777)SNP_18120 | 1332 | C | T | 15  | 9  | --     | --  |
|            | Ca(ICC2/PI489777)SNP_18121 | 1707 | A | G | 20  | 6  | --     | --  |
|            | Ca(ICC2/PI489777)SNP_18122 | 1716 | T | C | 23  | 3  | --     | --  |
|            | Ca(ICC2/PI489777)SNP_18123 | 1877 | T | G | 16  | 4  | --     | --  |
|            | Ca(ICC2/PI489777)SNP_18124 | 1887 | G | A | 16  | 4  | --     | --  |
|            | Ca(ICC2/PI489777)SNP_18125 | 1941 | G | A | 18  | 5  | --     | --  |

|            |                            |      |   |   |     |     |        |     |
|------------|----------------------------|------|---|---|-----|-----|--------|-----|
|            | Ca(ICC2/PI489777)SNP_18126 | 2004 | G | C | 13  | 5   | --     | --  |
|            | Ca(ICC2/PI489777)SNP_18127 | 2021 | T | C | 8   | 5   | --     | --  |
|            | Ca(ICC2/PI489777)SNP_18128 | 2175 | A | T | 16  | 5   | --     | --  |
|            | Ca(ICC2/PI489777)SNP_18129 | 2184 | T | A | 15  | 5   | --     | --  |
| CakTC31370 | Ca(ICC2/PI489777)SNP_18130 | 463  | T | A | 19  | 4   | --     | --  |
|            | Ca(ICC2/PI489777)SNP_18131 | 574  | T | C | 17  | 6   | --     | --  |
|            | Ca(ICC2/PI489777)SNP_18132 | 1369 | T | A | 16  | 11  | --     | --  |
|            | Ca(ICC2/PI489777)SNP_18133 | 2014 | G | A | 5   | 3   | --     | --  |
| CakTC35043 | Ca(ICC2/PI489777)SNP_18134 | 403  | G | C | 4   | 3   | Shoot  | --  |
|            | Ca(ICC2/PI489777)SNP_18135 | 432  | A | G | 3   | 3   | Shoot  | --  |
| CakTC25862 | Ca(ICC2/PI489777)SNP_18136 | 213  | A | G | 12  | 7   | --     | --  |
|            | Ca(ICC2/PI489777)SNP_18137 | 501  | C | T | 9   | 7   | --     | --  |
|            | Ca(ICC2/PI489777)SNP_18138 | 510  | T | G | 9   | 8   | --     | --  |
|            | Ca(ICC2/PI489777)SNP_18139 | 803  | T | C | 5   | 3   | --     | --  |
|            | Ca(ICC2/PI489777)SNP_18140 | 1001 | T | C | 11  | 3   | --     | --  |
|            | Ca(ICC2/PI489777)SNP_18141 | 1018 | G | C | 11  | 4   | --     | --  |
|            | Ca(ICC2/PI489777)SNP_18142 | 1108 | T | C | 7   | 4   | --     | --  |
| CakTC28774 | Ca(ICC2/PI489777)SNP_18143 | 873  | A | T | 7   | 4   | --     | --  |
|            | Ca(ICC2/PI489777)SNP_18144 | 891  | T | C | 7   | 3   | --     | --  |
| CakTC30739 | Ca(ICC2/PI489777)SNP_18145 | 611  | C | G | 7   | 3   | --     | --  |
|            | Ca(ICC2/PI489777)SNP_18146 | 636  | C | G | 7   | 4   | --     | --  |
| CakTC34285 | Ca(ICC2/PI489777)SNP_18147 | 852  | G | A | 38  | 24  | --     | --  |
|            | Ca(ICC2/PI489777)SNP_18148 | 2016 | T | C | 35  | 13  | --     | --  |
|            | Ca(ICC2/PI489777)SNP_18149 | 2136 | T | C | 15  | 11  | --     | --  |
|            | Ca(ICC2/PI489777)SNP_18150 | 2224 | G | A | 7   | 5   | --     | --  |
| CakTC39964 | Ca(ICC2/PI489777)SNP_18151 | 149  | G | A | 10  | 10  | --     | --  |
|            | Ca(ICC2/PI489777)SNP_18152 | 236  | T | A | 10  | 13  | --     | --  |
|            | Ca(ICC2/PI489777)SNP_18153 | 257  | T | C | 10  | 12  | --     | --  |
|            | Ca(ICC2/PI489777)SNP_18154 | 369  | C | T | 9   | 12  | --     | --  |
|            | Ca(ICC2/PI489777)SNP_18155 | 377  | A | G | 9   | 12  | --     | --  |
|            | Ca(ICC2/PI489777)SNP_18156 | 401  | G | A | 9   | 9   | --     | --  |
|            | Ca(ICC2/PI489777)SNP_18157 | 644  | G | A | 3   | 3   | --     | --  |
|            | Ca(ICC2/PI489777)SNP_18158 | 650  | C | T | 3   | 3   | --     | --  |
|            | Ca(ICC2/PI489777)SNP_18159 | 1235 | T | C | 7   | 3   | --     | --  |
|            | Ca(ICC2/PI489777)SNP_18160 | 1240 | C | A | 6   | 4   | --     | --  |
|            | Ca(ICC2/PI489777)SNP_18161 | 1391 | G | T | 4   | 3   | --     | --  |
| CakTC32977 | Ca(ICC2/PI489777)SNP_18162 | 387  | T | C | 19  | 10  | --     | --  |
|            | Ca(ICC2/PI489777)SNP_18163 | 820  | A | G | 10  | 9   | --     | --  |
| CakTC26332 | Ca(ICC2/PI489777)SNP_18164 | 204  | G | C | 35  | 12  | --     | --  |
|            | Ca(ICC2/PI489777)SNP_18165 | 636  | C | G | 131 | 53  | --     | --  |
| CakTC39638 | Ca(ICC2/PI489777)SNP_18166 | 313  | A | T | 19  | 18  | --     | --  |
|            | Ca(ICC2/PI489777)SNP_18167 | 426  | G | C | 15  | 14  | --     | --  |
|            | Ca(ICC2/PI489777)SNP_18168 | 521  | A | G | 17  | 14  | --     | --  |
| CakTC43344 | Ca(ICC2/PI489777)SNP_18169 | 802  | G | A | 89  | 28  | --     | --  |
| CakTC10609 | Ca(ICC2/PI489777)SNP_18170 | 981  | A | G | 7   | 4   | --     | --  |
|            | Ca(ICC2/PI489777)SNP_18171 | 1550 | T | G | 4   | 3   | --     | --  |
| CakTC39306 | Ca(ICC2/PI489777)SNP_18172 | 118  | C | T | 4   | 7   | --     | --  |
|            | Ca(ICC2/PI489777)SNP_18173 | 1263 | G | T | 5   | 4   | --     | --  |
|            | Ca(ICC2/PI489777)SNP_18174 | 1411 | T | A | 3   | 3   | --     | --  |
|            | Ca(ICC2/PI489777)SNP_18175 | 1434 | T | A | 3   | 3   | --     | --  |
|            | Ca(ICC2/PI489777)SNP_18176 | 1436 | A | G | 3   | 3   | --     | --  |
| CakTC38239 | Ca(ICC2/PI489777)SNP_18177 | 78   | G | C | 21  | 7   | --     | --  |
|            | Ca(ICC2/PI489777)SNP_18178 | 260  | T | C | 47  | 17  | --     | --  |
|            | Ca(ICC2/PI489777)SNP_18179 | 266  | T | C | 50  | 17  | --     | --  |
|            | Ca(ICC2/PI489777)SNP_18180 | 492  | A | G | 38  | 15  | --     | --  |
|            | Ca(ICC2/PI489777)SNP_18181 | 573  | C | T | 30  | 14  | --     | --  |
|            | Ca(ICC2/PI489777)SNP_18182 | 675  | C | T | 20  | 13  | --     | --  |
| CakTC38700 | Ca(ICC2/PI489777)SNP_18183 | 310  | C | T | 9   | 4   | --     | --  |
| CakTC18509 | Ca(ICC2/PI489777)SNP_18184 | 98   | T | C | 214 | 158 | --     | --  |
| CakTC38814 | Ca(ICC2/PI489777)SNP_18185 | 83   | A | T | 19  | 5   | --     | --  |
|            | Ca(ICC2/PI489777)SNP_18186 | 990  | C | T | 21  | 16  | --     | --  |
|            | Ca(ICC2/PI489777)SNP_18187 | 1030 | A | G | 22  | 17  | --     | --  |
| CakTC24878 | Ca(ICC2/PI489777)SNP_18188 | 566  | A | G | 13  | 20  | --     | --  |
| CakTC39595 | Ca(ICC2/PI489777)SNP_18189 | 39   | C | G | 19  | 6   | --     | --  |
|            | Ca(ICC2/PI489777)SNP_18190 | 874  | G | A | 14  | 5   | --     | --  |
|            | Ca(ICC2/PI489777)SNP_18191 | 895  | T | C | 15  | 5   | --     | --  |
| CakTC23140 | Ca(ICC2/PI489777)SNP_18192 | 326  | C | T | 8   | 8   | --     | --  |
| CakTC32283 | Ca(ICC2/PI489777)SNP_18193 | 200  | T | A | 9   | 7   | Flower | bud |
|            | Ca(ICC2/PI489777)SNP_18194 | 202  | A | G | 9   | 7   | Flower | bud |
|            | Ca(ICC2/PI489777)SNP_18195 | 567  | T | C | 7   | 3   | Flower | bud |
|            | Ca(ICC2/PI489777)SNP_18196 | 817  | A | C | 9   | 3   | Flower | bud |
|            | Ca(ICC2/PI489777)SNP_18197 | 824  | A | C | 6   | 3   | Flower | bud |
|            | Ca(ICC2/PI489777)SNP_18198 | 873  | T | C | 9   | 3   | Flower | bud |
|            | Ca(ICC2/PI489777)SNP_18199 | 922  | C | T | 7   | 3   | Flower | bud |

|            |                            |      |   |   |    |    |        |       |
|------------|----------------------------|------|---|---|----|----|--------|-------|
|            | Ca(ICC2/PI489777)SNP_18200 | 957  | T | A | 12 | 3  | Flower | bud   |
|            | Ca(ICC2/PI489777)SNP_18201 | 1004 | C | T | 11 | 3  | Flower | bud   |
|            | Ca(ICC2/PI489777)SNP_18202 | 1711 | C | T | 16 | 6  | Flower | bud   |
|            | Ca(ICC2/PI489777)SNP_18203 | 1930 | T | G | 13 | 6  | Flower | bud   |
| CakTC32945 | Ca(ICC2/PI489777)SNP_18204 | 777  | G | A | 5  | 3  | --     | --    |
| CakTC39635 | Ca(ICC2/PI489777)SNP_18205 | 809  | A | G | 34 | 15 | --     | --    |
| CakTC42982 | Ca(ICC2/PI489777)SNP_18206 | 720  | C | G | 9  | 3  | --     | --    |
| CakTC24450 | Ca(ICC2/PI489777)SNP_18207 | 543  | G | A | 21 | 25 | --     | --    |
|            | Ca(ICC2/PI489777)SNP_18208 | 934  | G | C | 22 | 19 | --     | --    |
|            | Ca(ICC2/PI489777)SNP_18209 | 1196 | T | C | 16 | 18 | --     | --    |
|            | Ca(ICC2/PI489777)SNP_18210 | 1335 | C | T | 37 | 15 | --     | --    |
|            | Ca(ICC2/PI489777)SNP_18211 | 1502 | G | C | 27 | 25 | --     | --    |
|            | Ca(ICC2/PI489777)SNP_18212 | 1666 | G | C | 21 | 19 | --     | --    |
| CakTC10845 | Ca(ICC2/PI489777)SNP_18213 | 52   | T | A | 3  | 5  | --     | --    |
|            | Ca(ICC2/PI489777)SNP_18214 | 139  | C | G | 11 | 9  | --     | --    |
|            | Ca(ICC2/PI489777)SNP_18215 | 170  | C | T | 11 | 8  | --     | --    |
|            | Ca(ICC2/PI489777)SNP_18216 | 181  | G | C | 11 | 10 | --     | --    |
|            | Ca(ICC2/PI489777)SNP_18217 | 204  | C | G | 11 | 10 | --     | --    |
|            | Ca(ICC2/PI489777)SNP_18218 | 228  | A | T | 17 | 10 | --     | --    |
| CakTC41942 | Ca(ICC2/PI489777)SNP_18219 | 98   | C | T | 12 | 3  | --     | --    |
|            | Ca(ICC2/PI489777)SNP_18220 | 99   | T | A | 12 | 3  | --     | --    |
|            | Ca(ICC2/PI489777)SNP_18221 | 365  | T | C | 23 | 5  | --     | --    |
|            | Ca(ICC2/PI489777)SNP_18222 | 581  | T | C | 21 | 7  | --     | --    |
|            | Ca(ICC2/PI489777)SNP_18223 | 671  | C | T | 15 | 10 | --     | --    |
|            | Ca(ICC2/PI489777)SNP_18224 | 884  | G | A | 33 | 8  | --     | --    |
|            | Ca(ICC2/PI489777)SNP_18225 | 1148 | A | G | 29 | 14 | --     | --    |
| CakTC23543 | Ca(ICC2/PI489777)SNP_18226 | 320  | A | G | 4  | 4  | --     | --    |
|            | Ca(ICC2/PI489777)SNP_18227 | 359  | T | G | 4  | 4  | --     | --    |
|            | Ca(ICC2/PI489777)SNP_18228 | 393  | C | T | 4  | 4  | --     | --    |
| CakTC23924 | Ca(ICC2/PI489777)SNP_18229 | 982  | T | A | 25 | 7  | --     | --    |
|            | Ca(ICC2/PI489777)SNP_18230 | 986  | G | A | 25 | 9  | --     | --    |
|            | Ca(ICC2/PI489777)SNP_18231 | 1020 | T | C | 24 | 9  | --     | --    |
|            | Ca(ICC2/PI489777)SNP_18232 | 1620 | G | T | 43 | 26 | --     | --    |
| CakTC39779 | Ca(ICC2/PI489777)SNP_18233 | 217  | T | C | 18 | 10 | --     | --    |
| CakTC09687 | Ca(ICC2/PI489777)SNP_18234 | 4473 | C | T | 3  | 4  | --     | --    |
| CakTC41565 | Ca(ICC2/PI489777)SNP_18235 | 95   | G | T | 9  | 11 | --     | --    |
|            | Ca(ICC2/PI489777)SNP_18236 | 142  | A | T | 10 | 12 | --     | --    |
|            | Ca(ICC2/PI489777)SNP_18237 | 374  | T | C | 18 | 14 | --     | --    |
|            | Ca(ICC2/PI489777)SNP_18238 | 602  | C | T | 11 | 10 | --     | --    |
|            | Ca(ICC2/PI489777)SNP_18239 | 612  | G | A | 10 | 8  | --     | --    |
| CakTC26419 | Ca(ICC2/PI489777)SNP_18240 | 679  | T | G | 14 | 3  | --     | --    |
| CakTC23788 | Ca(ICC2/PI489777)SNP_18241 | 473  | T | C | 8  | 8  | --     | IWS1  |
|            | Ca(ICC2/PI489777)SNP_18242 | 479  | T | A | 9  | 8  | --     | IWS1  |
|            | Ca(ICC2/PI489777)SNP_18243 | 495  | G | A | 10 | 8  | --     | IWS1  |
|            | Ca(ICC2/PI489777)SNP_18244 | 1569 | C | T | 26 | 17 | --     | IWS1  |
| CakTC28832 | Ca(ICC2/PI489777)SNP_18245 | 146  | C | T | 59 | 18 | --     | --    |
| CakTC27196 | Ca(ICC2/PI489777)SNP_18246 | 241  | A | C | 10 | 4  | --     | --    |
|            | Ca(ICC2/PI489777)SNP_18247 | 353  | A | G | 7  | 4  | --     | --    |
|            | Ca(ICC2/PI489777)SNP_18248 | 444  | A | G | 6  | 3  | --     | --    |
| CakTC24084 | Ca(ICC2/PI489777)SNP_18249 | 2351 | T | C | 3  | 4  | --     | PLATZ |
| CakTC04172 | Ca(ICC2/PI489777)SNP_18250 | 191  | T | A | 7  | 7  | --     | --    |
| CakTC41056 | Ca(ICC2/PI489777)SNP_18251 | 116  | C | G | 5  | 3  | --     | --    |
|            | Ca(ICC2/PI489777)SNP_18252 | 175  | T | C | 7  | 7  | --     | --    |
|            | Ca(ICC2/PI489777)SNP_18253 | 254  | C | G | 9  | 9  | --     | --    |
|            | Ca(ICC2/PI489777)SNP_18254 | 502  | G | A | 14 | 7  | --     | --    |
|            | Ca(ICC2/PI489777)SNP_18255 | 886  | C | T | 23 | 4  | --     | --    |
|            | Ca(ICC2/PI489777)SNP_18256 | 919  | C | A | 21 | 5  | --     | --    |
|            | Ca(ICC2/PI489777)SNP_18257 | 1066 | G | A | 22 | 5  | --     | --    |
|            | Ca(ICC2/PI489777)SNP_18258 | 1348 | T | A | 21 | 11 | --     | --    |
|            | Ca(ICC2/PI489777)SNP_18259 | 1409 | T | C | 15 | 13 | --     | --    |
|            | Ca(ICC2/PI489777)SNP_18260 | 1435 | T | C | 22 | 12 | --     | --    |
|            | Ca(ICC2/PI489777)SNP_18261 | 1972 | A | G | 55 | 11 | --     | --    |
|            | Ca(ICC2/PI489777)SNP_18262 | 2135 | A | C | 38 | 10 | --     | --    |
|            | Ca(ICC2/PI489777)SNP_18263 | 2137 | G | A | 35 | 10 | --     | --    |
|            | Ca(ICC2/PI489777)SNP_18264 | 2261 | C | A | 25 | 7  | --     | --    |
|            | Ca(ICC2/PI489777)SNP_18265 | 2304 | C | T | 19 | 5  | --     | --    |
|            | Ca(ICC2/PI489777)SNP_18266 | 2327 | G | A | 12 | 5  | --     | --    |
|            | Ca(ICC2/PI489777)SNP_18267 | 2362 | A | C | 3  | 3  | --     | --    |
|            | Ca(ICC2/PI489777)SNP_18268 | 2368 | C | A | 3  | 3  | --     | --    |
| CakTC41427 | Ca(ICC2/PI489777)SNP_18269 | 282  | T | A | 8  | 10 | --     | --    |
|            | Ca(ICC2/PI489777)SNP_18270 | 459  | C | T | 9  | 8  | --     | --    |
| CakTC42320 | Ca(ICC2/PI489777)SNP_18271 | 241  | C | T | 35 | 17 | --     | --    |
|            | Ca(ICC2/PI489777)SNP_18272 | 514  | A | G | 19 | 17 | --     | --    |
|            | Ca(ICC2/PI489777)SNP_18273 | 1111 | C | T | 50 | 15 | --     | --    |

|            |                            |      |   |   |    |    |           |           |
|------------|----------------------------|------|---|---|----|----|-----------|-----------|
| CakTC32699 | Ca(ICC2/PI489777)SNP_18274 | 524  | C | T | 7  | 7  | --        | SNF2      |
|            | Ca(ICC2/PI489777)SNP_18275 | 686  | C | T | 16 | 8  | --        | SNF2      |
|            | Ca(ICC2/PI489777)SNP_18276 | 1372 | C | T | 21 | 8  | --        | SNF2      |
|            | Ca(ICC2/PI489777)SNP_18277 | 1614 | T | A | 11 | 4  | --        | SNF2      |
|            | Ca(ICC2/PI489777)SNP_18278 | 2034 | C | G | 14 | 7  | --        | SNF2      |
|            | Ca(ICC2/PI489777)SNP_18279 | 2465 | A | G | 11 | 5  | --        | SNF2      |
|            | Ca(ICC2/PI489777)SNP_18280 | 2637 | G | A | 9  | 8  | --        | SNF2      |
|            | Ca(ICC2/PI489777)SNP_18281 | 2982 | A | G | 7  | 4  | --        | SNF2      |
|            | Ca(ICC2/PI489777)SNP_18282 | 3933 | A | G | 9  | 9  | --        | SNF2      |
|            | Ca(ICC2/PI489777)SNP_18283 | 4127 | G | A | 9  | 13 | --        | SNF2      |
|            | Ca(ICC2/PI489777)SNP_18284 | 4149 | T | C | 7  | 11 | --        | SNF2      |
|            | Ca(ICC2/PI489777)SNP_18285 | 4157 | T | C | 7  | 11 | --        | SNF2      |
| CakTC43120 | Ca(ICC2/PI489777)SNP_18286 | 870  | C | T | 6  | 10 | Young_pod | --        |
| CakTC24546 | Ca(ICC2/PI489777)SNP_18287 | 121  | C | T | 13 | 6  | --        | --        |
|            | Ca(ICC2/PI489777)SNP_18288 | 917  | C | T | 9  | 6  | --        | --        |
|            | Ca(ICC2/PI489777)SNP_18289 | 1620 | C | T | 13 | 14 | --        | --        |
|            | Ca(ICC2/PI489777)SNP_18290 | 2886 | T | C | 31 | 16 | --        | --        |
| CakTC25485 | Ca(ICC2/PI489777)SNP_18291 | 70   | T | C | 7  | 8  | --        | --        |
|            | Ca(ICC2/PI489777)SNP_18292 | 1363 | G | A | 24 | 8  | --        | --        |
|            | Ca(ICC2/PI489777)SNP_18293 | 4161 | T | C | 4  | 7  | --        | --        |
| CakTC32146 | Ca(ICC2/PI489777)SNP_18294 | 914  | G | A | 5  | 3  | --        | --        |
|            | Ca(ICC2/PI489777)SNP_18295 | 987  | G | A | 5  | 4  | --        | --        |
|            | Ca(ICC2/PI489777)SNP_18296 | 1027 | G | T | 4  | 4  | --        | --        |
|            | Ca(ICC2/PI489777)SNP_18297 | 1731 | A | G | 6  | 4  | --        | --        |
|            | Ca(ICC2/PI489777)SNP_18298 | 1787 | G | C | 5  | 3  | --        | --        |
| CakTC26733 | Ca(ICC2/PI489777)SNP_18299 | 755  | T | A | 8  | 10 | --        | --        |
|            | Ca(ICC2/PI489777)SNP_18300 | 756  | C | G | 8  | 10 | --        | --        |
|            | Ca(ICC2/PI489777)SNP_18301 | 1096 | A | C | 10 | 17 | --        | --        |
|            | Ca(ICC2/PI489777)SNP_18302 | 1204 | A | G | 16 | 12 | --        | --        |
|            | Ca(ICC2/PI489777)SNP_18303 | 1222 | A | C | 14 | 12 | --        | --        |
|            | Ca(ICC2/PI489777)SNP_18304 | 1314 | C | T | 15 | 11 | --        | --        |
|            | Ca(ICC2/PI489777)SNP_18305 | 1357 | C | T | 8  | 3  | --        | --        |
|            | Ca(ICC2/PI489777)SNP_18306 | 1567 | C | T | 4  | 3  | --        | --        |
|            | Ca(ICC2/PI489777)SNP_18307 | 1594 | T | A | 4  | 3  | --        | --        |
| CakTC04878 | Ca(ICC2/PI489777)SNP_18308 | 694  | C | T | 6  | 5  | --        | --        |
|            | Ca(ICC2/PI489777)SNP_18309 | 697  | G | A | 6  | 5  | --        | --        |
| CakTC37041 | Ca(ICC2/PI489777)SNP_18310 | 1114 | A | G | 68 | 38 | --        | --        |
|            | Ca(ICC2/PI489777)SNP_18311 | 2036 | C | A | 49 | 24 | --        | --        |
|            | Ca(ICC2/PI489777)SNP_18312 | 2044 | G | C | 49 | 24 | --        | --        |
| CakTC27520 | Ca(ICC2/PI489777)SNP_18313 | 225  | G | A | 10 | 4  | --        | --        |
|            | Ca(ICC2/PI489777)SNP_18314 | 609  | T | C | 12 | 7  | --        | --        |
|            | Ca(ICC2/PI489777)SNP_18315 | 697  | G | A | 12 | 7  | --        | --        |
|            | Ca(ICC2/PI489777)SNP_18316 | 1321 | G | A | 7  | 4  | --        | --        |
| CakTC41982 | Ca(ICC2/PI489777)SNP_18317 | 1038 | C | A | 10 | 3  | --        | --        |
|            | Ca(ICC2/PI489777)SNP_18318 | 1441 | A | G | 9  | 6  | --        | --        |
|            | Ca(ICC2/PI489777)SNP_18319 | 1754 | A | G | 7  | 3  | --        | --        |
| CakTC23573 | Ca(ICC2/PI489777)SNP_18320 | 2460 | G | C | 33 | 32 | --        | --        |
|            | Ca(ICC2/PI489777)SNP_18321 | 2481 | T | A | 31 | 30 | --        | --        |
|            | Ca(ICC2/PI489777)SNP_18322 | 2802 | A | T | 16 | 21 | --        | --        |
| CakTC25926 | Ca(ICC2/PI489777)SNP_18323 | 548  | C | T | 13 | 8  | --        | --        |
|            | Ca(ICC2/PI489777)SNP_18324 | 593  | T | C | 11 | 8  | --        | --        |
|            | Ca(ICC2/PI489777)SNP_18325 | 680  | A | G | 7  | 7  | --        | --        |
| CakTC38584 | Ca(ICC2/PI489777)SNP_18326 | 680  | A | C | 4  | 6  | --        | --        |
|            | Ca(ICC2/PI489777)SNP_18327 | 867  | C | T | 6  | 8  | --        | --        |
|            | Ca(ICC2/PI489777)SNP_18328 | 987  | T | A | 5  | 3  | --        | --        |
| CakTC39383 | Ca(ICC2/PI489777)SNP_18329 | 1015 | G | A | 10 | 5  | --        | --        |
| CakTC18569 | Ca(ICC2/PI489777)SNP_18330 | 485  | A | G | 4  | 4  | --        | --        |
|            | Ca(ICC2/PI489777)SNP_18331 | 530  | C | T | 3  | 4  | --        | --        |
|            | Ca(ICC2/PI489777)SNP_18332 | 533  | G | T | 3  | 4  | --        | --        |
|            | Ca(ICC2/PI489777)SNP_18333 | 657  | A | G | 3  | 4  | --        | --        |
| CakTC33402 | Ca(ICC2/PI489777)SNP_18334 | 122  | T | C | 9  | 3  | --        | --        |
|            | Ca(ICC2/PI489777)SNP_18335 | 173  | C | T | 10 | 4  | --        | --        |
|            | Ca(ICC2/PI489777)SNP_18336 | 450  | T | C | 16 | 8  | --        | --        |
|            | Ca(ICC2/PI489777)SNP_18337 | 645  | G | A | 24 | 7  | --        | --        |
|            | Ca(ICC2/PI489777)SNP_18338 | 672  | G | T | 24 | 7  | --        | --        |
|            | Ca(ICC2/PI489777)SNP_18339 | 1008 | G | A | 11 | 3  | --        | --        |
|            | Ca(ICC2/PI489777)SNP_18340 | 1134 | A | G | 12 | 4  | --        | --        |
|            | Ca(ICC2/PI489777)SNP_18341 | 1716 | C | T | 16 | 21 | --        | --        |
|            | Ca(ICC2/PI489777)SNP_18342 | 1770 | C | T | 13 | 20 | --        | --        |
| CakTC36437 | Ca(ICC2/PI489777)SNP_18343 | 92   | T | C | 30 | 8  | --        | S1Fa-like |
|            | Ca(ICC2/PI489777)SNP_18344 | 239  | C | G | 35 | 10 | --        | S1Fa-like |
| CakTC40171 | Ca(ICC2/PI489777)SNP_18345 | 564  | T | G | 59 | 11 | --        | --        |
|            | Ca(ICC2/PI489777)SNP_18346 | 594  | C | T | 53 | 12 | --        | --        |
|            | Ca(ICC2/PI489777)SNP_18347 | 604  | T | C | 60 | 14 | --        | --        |



|            |                             |      |   |   |     |    |    |     |
|------------|-----------------------------|------|---|---|-----|----|----|-----|
|            | Ca(ICCV2/PI489777)SNP_18348 | 1255 | A | G | 31  | 12 | -- | --  |
|            | Ca(ICCV2/PI489777)SNP_18349 | 1324 | A | G | 38  | 18 | -- | --  |
| CakTC22978 | Ca(ICCV2/PI489777)SNP_18350 | 1437 | T | C | 197 | 81 | -- | --  |
|            | Ca(ICCV2/PI489777)SNP_18351 | 2371 | A | T | 188 | 59 | -- | --  |
| CakTC37039 | Ca(ICCV2/PI489777)SNP_18352 | 490  | T | C | 4   | 3  | -- | --  |
| CakTC29031 | Ca(ICCV2/PI489777)SNP_18353 | 263  | A | G | 3   | 16 | -- | --  |
|            | Ca(ICCV2/PI489777)SNP_18354 | 264  | C | T | 3   | 16 | -- | --  |
|            | Ca(ICCV2/PI489777)SNP_18355 | 274  | A | T | 3   | 16 | -- | --  |
|            | Ca(ICCV2/PI489777)SNP_18356 | 275  | A | C | 3   | 16 | -- | --  |
|            | Ca(ICCV2/PI489777)SNP_18357 | 730  | G | A | 89  | 31 | -- | --  |
|            | Ca(ICCV2/PI489777)SNP_18358 | 756  | C | G | 90  | 26 | -- | --  |
|            | Ca(ICCV2/PI489777)SNP_18359 | 905  | C | G | 91  | 34 | -- | --  |
|            | Ca(ICCV2/PI489777)SNP_18360 | 1045 | C | T | 61  | 29 | -- | --  |
|            | Ca(ICCV2/PI489777)SNP_18361 | 1197 | C | G | 40  | 13 | -- | --  |
|            | Ca(ICCV2/PI489777)SNP_18362 | 1480 | T | C | 66  | 28 | -- | --  |
|            | Ca(ICCV2/PI489777)SNP_18363 | 1519 | G | A | 64  | 31 | -- | --  |
|            | Ca(ICCV2/PI489777)SNP_18364 | 1647 | T | C | 69  | 34 | -- | --  |
|            | Ca(ICCV2/PI489777)SNP_18365 | 1674 | T | C | 64  | 33 | -- | --  |
|            | Ca(ICCV2/PI489777)SNP_18366 | 1678 | T | G | 60  | 33 | -- | --  |
| CakTC39656 | Ca(ICCV2/PI489777)SNP_18367 | 866  | C | T | 9   | 5  | -- | --  |
| CakTC13071 | Ca(ICCV2/PI489777)SNP_18368 | 1588 | T | C | 7   | 3  | -- | --  |
| CakTC31588 | Ca(ICCV2/PI489777)SNP_18369 | 2020 | A | G | 13  | 9  | -- | --  |
|            | Ca(ICCV2/PI489777)SNP_18370 | 2179 | G | T | 11  | 12 | -- | --  |
|            | Ca(ICCV2/PI489777)SNP_18371 | 2245 | A | G | 8   | 11 | -- | --  |
|            | Ca(ICCV2/PI489777)SNP_18372 | 2713 | A | G | 7   | 7  | -- | --  |
|            | Ca(ICCV2/PI489777)SNP_18373 | 2758 | C | T | 9   | 6  | -- | --  |
| CakTC26634 | Ca(ICCV2/PI489777)SNP_18374 | 514  | A | G | 39  | 12 | -- | --  |
|            | Ca(ICCV2/PI489777)SNP_18375 | 655  | T | C | 36  | 28 | -- | --  |
|            | Ca(ICCV2/PI489777)SNP_18376 | 913  | C | T | 47  | 35 | -- | --  |
|            | Ca(ICCV2/PI489777)SNP_18377 | 922  | C | G | 51  | 36 | -- | --  |
|            | Ca(ICCV2/PI489777)SNP_18378 | 1138 | C | T | 42  | 30 | -- | --  |
|            | Ca(ICCV2/PI489777)SNP_18379 | 1150 | T | C | 42  | 31 | -- | --  |
|            | Ca(ICCV2/PI489777)SNP_18380 | 1162 | T | A | 33  | 29 | -- | --  |
|            | Ca(ICCV2/PI489777)SNP_18381 | 1177 | T | C | 43  | 28 | -- | --  |
|            | Ca(ICCV2/PI489777)SNP_18382 | 1211 | A | T | 42  | 30 | -- | --  |
|            | Ca(ICCV2/PI489777)SNP_18383 | 1273 | G | A | 32  | 28 | -- | --  |
|            | Ca(ICCV2/PI489777)SNP_18384 | 1309 | A | G | 32  | 18 | -- | --  |
|            | Ca(ICCV2/PI489777)SNP_18385 | 1318 | T | C | 33  | 16 | -- | --  |
|            | Ca(ICCV2/PI489777)SNP_18386 | 1648 | C | T | 26  | 17 | -- | --  |
|            | Ca(ICCV2/PI489777)SNP_18387 | 1700 | C | T | 23  | 17 | -- | --  |
|            | Ca(ICCV2/PI489777)SNP_18388 | 1876 | C | T | 13  | 6  | -- | --  |
|            | Ca(ICCV2/PI489777)SNP_18389 | 1898 | C | T | 12  | 6  | -- | --  |
| CakTC33468 | Ca(ICCV2/PI489777)SNP_18390 | 409  | G | A | 7   | 7  | -- | --  |
|            | Ca(ICCV2/PI489777)SNP_18391 | 455  | C | T | 3   | 5  | -- | --  |
| CakTC39293 | Ca(ICCV2/PI489777)SNP_18392 | 64   | C | G | 7   | 5  | -- | --  |
|            | Ca(ICCV2/PI489777)SNP_18393 | 287  | A | G | 14  | 8  | -- | --  |
|            | Ca(ICCV2/PI489777)SNP_18394 | 1191 | A | T | 15  | 17 | -- | --  |
| CakTC24859 | Ca(ICCV2/PI489777)SNP_18395 | 195  | G | C | 3   | 5  | -- | TUB |
|            | Ca(ICCV2/PI489777)SNP_18396 | 265  | G | A | 5   | 6  | -- | TUB |
|            | Ca(ICCV2/PI489777)SNP_18397 | 436  | C | T | 10  | 11 | -- | TUB |
|            | Ca(ICCV2/PI489777)SNP_18398 | 487  | A | G | 9   | 13 | -- | TUB |
|            | Ca(ICCV2/PI489777)SNP_18399 | 571  | A | G | 8   | 12 | -- | TUB |
|            | Ca(ICCV2/PI489777)SNP_18400 | 742  | A | C | 12  | 11 | -- | TUB |
|            | Ca(ICCV2/PI489777)SNP_18401 | 1240 | A | G | 14  | 13 | -- | TUB |
|            | Ca(ICCV2/PI489777)SNP_18402 | 1372 | A | C | 15  | 4  | -- | TUB |
|            | Ca(ICCV2/PI489777)SNP_18403 | 1429 | C | A | 10  | 5  | -- | TUB |
| CakTC23918 | Ca(ICCV2/PI489777)SNP_18404 | 820  | G | C | 26  | 6  | -- | --  |
|            | Ca(ICCV2/PI489777)SNP_18405 | 825  | C | A | 25  | 6  | -- | --  |
|            | Ca(ICCV2/PI489777)SNP_18406 | 866  | G | A | 25  | 7  | -- | --  |
|            | Ca(ICCV2/PI489777)SNP_18407 | 873  | G | C | 26  | 7  | -- | --  |
|            | Ca(ICCV2/PI489777)SNP_18408 | 919  | T | C | 23  | 5  | -- | --  |
|            | Ca(ICCV2/PI489777)SNP_18409 | 964  | G | C | 27  | 6  | -- | --  |
|            | Ca(ICCV2/PI489777)SNP_18410 | 972  | T | C | 28  | 8  | -- | --  |
|            | Ca(ICCV2/PI489777)SNP_18411 | 1125 | G | T | 26  | 8  | -- | --  |
|            | Ca(ICCV2/PI489777)SNP_18412 | 1428 | A | G | 15  | 3  | -- | --  |
|            | Ca(ICCV2/PI489777)SNP_18413 | 1911 | T | G | 31  | 11 | -- | --  |
|            | Ca(ICCV2/PI489777)SNP_18414 | 1965 | G | A | 33  | 15 | -- | --  |
|            | Ca(ICCV2/PI489777)SNP_18415 | 2013 | G | A | 33  | 17 | -- | --  |
|            | Ca(ICCV2/PI489777)SNP_18416 | 2016 | C | A | 33  | 17 | -- | --  |
|            | Ca(ICCV2/PI489777)SNP_18417 | 2290 | G | C | 18  | 12 | -- | --  |
| CakTC37989 | Ca(ICCV2/PI489777)SNP_18418 | 98   | C | T | 19  | 18 | -- | --  |
|            | Ca(ICCV2/PI489777)SNP_18419 | 452  | C | T | 19  | 21 | -- | --  |
|            | Ca(ICCV2/PI489777)SNP_18420 | 497  | C | T | 24  | 15 | -- | --  |
|            | Ca(ICCV2/PI489777)SNP_18421 | 624  | A | G | 18  | 15 | -- | --  |

|            |                             |      |   |   |    |    |    |     |
|------------|-----------------------------|------|---|---|----|----|----|-----|
|            | Ca(ICCV2/PI489777)SNP_18422 | 754  | A | C | 18 | 15 | -- | --  |
|            | Ca(ICCV2/PI489777)SNP_18423 | 811  | C | T | 18 | 14 | -- | --  |
|            | Ca(ICCV2/PI489777)SNP_18424 | 852  | A | G | 15 | 11 | -- | --  |
|            | Ca(ICCV2/PI489777)SNP_18425 | 883  | A | C | 12 | 10 | -- | --  |
| CakTC30544 | Ca(ICCV2/PI489777)SNP_18426 | 1166 | G | A | 21 | 6  | -- | --  |
|            | Ca(ICCV2/PI489777)SNP_18427 | 1441 | C | T | 11 | 4  | -- | --  |
|            | Ca(ICCV2/PI489777)SNP_18428 | 1522 | G | A | 13 | 4  | -- | --  |
|            | Ca(ICCV2/PI489777)SNP_18429 | 1785 | T | A | 16 | 9  | -- | --  |
|            | Ca(ICCV2/PI489777)SNP_18430 | 1930 | G | A | 4  | 4  | -- | --  |
| CakTC40887 | Ca(ICCV2/PI489777)SNP_18431 | 324  | C | G | 6  | 10 | -- | --  |
|            | Ca(ICCV2/PI489777)SNP_18432 | 345  | G | A | 7  | 6  | -- | --  |
|            | Ca(ICCV2/PI489777)SNP_18433 | 470  | A | C | 11 | 22 | -- | --  |
|            | Ca(ICCV2/PI489777)SNP_18434 | 488  | G | A | 12 | 18 | -- | --  |
|            | Ca(ICCV2/PI489777)SNP_18435 | 614  | A | G | 7  | 18 | -- | --  |
|            | Ca(ICCV2/PI489777)SNP_18436 | 683  | G | A | 10 | 15 | -- | --  |
| CakTC09949 | Ca(ICCV2/PI489777)SNP_18437 | 1056 | A | G | 4  | 4  | -- | --  |
|            | Ca(ICCV2/PI489777)SNP_18438 | 1205 | G | C | 5  | 3  | -- | --  |
|            | Ca(ICCV2/PI489777)SNP_18439 | 3241 | C | T | 3  | 4  | -- | --  |
|            | Ca(ICCV2/PI489777)SNP_18440 | 3265 | C | T | 3  | 5  | -- | --  |
| CakTC28586 | Ca(ICCV2/PI489777)SNP_18441 | 415  | G | T | 21 | 9  | -- | --  |
|            | Ca(ICCV2/PI489777)SNP_18442 | 716  | A | G | 16 | 11 | -- | --  |
|            | Ca(ICCV2/PI489777)SNP_18443 | 1078 | C | T | 6  | 7  | -- | --  |
|            | Ca(ICCV2/PI489777)SNP_18444 | 1154 | T | A | 8  | 6  | -- | --  |
| CakTC27712 | Ca(ICCV2/PI489777)SNP_18445 | 935  | T | C | 13 | 10 | -- | --  |
|            | Ca(ICCV2/PI489777)SNP_18446 | 977  | T | C | 11 | 10 | -- | --  |
| CakTC07642 | Ca(ICCV2/PI489777)SNP_18447 | 500  | C | G | 3  | 3  | -- | --  |
| CakTC24978 | Ca(ICCV2/PI489777)SNP_18448 | 514  | C | T | 15 | 9  | -- | --  |
|            | Ca(ICCV2/PI489777)SNP_18449 | 711  | A | G | 14 | 6  | -- | --  |
|            | Ca(ICCV2/PI489777)SNP_18450 | 1970 | T | C | 6  | 3  | -- | --  |
|            | Ca(ICCV2/PI489777)SNP_18451 | 2294 | G | T | 16 | 5  | -- | --  |
| CakTC40350 | Ca(ICCV2/PI489777)SNP_18452 | 137  | A | C | 37 | 24 | -- | --  |
|            | Ca(ICCV2/PI489777)SNP_18453 | 653  | G | A | 10 | 6  | -- | --  |
|            | Ca(ICCV2/PI489777)SNP_18454 | 659  | A | G | 8  | 5  | -- | --  |
| CakTC37118 | Ca(ICCV2/PI489777)SNP_18455 | 768  | T | C | 8  | 20 | -- | --  |
| CakTC33297 | Ca(ICCV2/PI489777)SNP_18456 | 664  | T | A | 8  | 4  | -- | --  |
|            | Ca(ICCV2/PI489777)SNP_18457 | 1090 | C | T | 15 | 3  | -- | --  |
|            | Ca(ICCV2/PI489777)SNP_18458 | 1987 | C | T | 14 | 6  | -- | --  |
|            | Ca(ICCV2/PI489777)SNP_18459 | 2045 | C | A | 16 | 7  | -- | --  |
|            | Ca(ICCV2/PI489777)SNP_18460 | 2759 | T | C | 3  | 5  | -- | --  |
| CakTC38709 | Ca(ICCV2/PI489777)SNP_18461 | 334  | T | C | 34 | 21 | -- | --  |
|            | Ca(ICCV2/PI489777)SNP_18462 | 508  | G | A | 20 | 24 | -- | --  |
|            | Ca(ICCV2/PI489777)SNP_18463 | 631  | C | T | 23 | 21 | -- | --  |
|            | Ca(ICCV2/PI489777)SNP_18464 | 883  | C | T | 26 | 14 | -- | --  |
|            | Ca(ICCV2/PI489777)SNP_18465 | 1081 | G | T | 16 | 5  | -- | --  |
|            | Ca(ICCV2/PI489777)SNP_18466 | 1122 | T | A | 9  | 4  | -- | --  |
|            | Ca(ICCV2/PI489777)SNP_18467 | 1223 | A | G | 7  | 3  | -- | --  |
| CakTC41454 | Ca(ICCV2/PI489777)SNP_18468 | 693  | A | G | 25 | 20 | -- | --  |
| CakTC26818 | Ca(ICCV2/PI489777)SNP_18469 | 1245 | A | G | 15 | 7  | -- | --  |
| CakTC25494 | Ca(ICCV2/PI489777)SNP_18470 | 287  | A | G | 12 | 10 | -- | SET |
| CakTC38098 | Ca(ICCV2/PI489777)SNP_18471 | 272  | C | G | 23 | 4  | -- | --  |
|            | Ca(ICCV2/PI489777)SNP_18472 | 386  | C | T | 23 | 4  | -- | --  |
|            | Ca(ICCV2/PI489777)SNP_18473 | 455  | C | T | 20 | 3  | -- | --  |
| CakTC40430 | Ca(ICCV2/PI489777)SNP_18474 | 48   | T | A | 13 | 4  | -- | --  |
|            | Ca(ICCV2/PI489777)SNP_18475 | 270  | T | C | 30 | 21 | -- | --  |
|            | Ca(ICCV2/PI489777)SNP_18476 | 289  | C | A | 17 | 22 | -- | --  |
|            | Ca(ICCV2/PI489777)SNP_18477 | 483  | G | A | 19 | 20 | -- | --  |
| CakTC42712 | Ca(ICCV2/PI489777)SNP_18478 | 1530 | A | G | 54 | 42 | -- | --  |
|            | Ca(ICCV2/PI489777)SNP_18479 | 1659 | T | C | 49 | 38 | -- | --  |
| CakTC27823 | Ca(ICCV2/PI489777)SNP_18480 | 2391 | T | C | 8  | 5  | -- | --  |
|            | Ca(ICCV2/PI489777)SNP_18481 | 2694 | A | G | 19 | 3  | -- | --  |
| CakTC33761 | Ca(ICCV2/PI489777)SNP_18482 | 238  | C | A | 28 | 6  | -- | --  |
|            | Ca(ICCV2/PI489777)SNP_18483 | 359  | T | C | 22 | 13 | -- | --  |
|            | Ca(ICCV2/PI489777)SNP_18484 | 514  | A | G | 31 | 6  | -- | --  |
| CakTC34513 | Ca(ICCV2/PI489777)SNP_18485 | 166  | A | G | 55 | 35 | -- | --  |
|            | Ca(ICCV2/PI489777)SNP_18486 | 360  | G | C | 38 | 43 | -- | --  |
| CakTC30014 | Ca(ICCV2/PI489777)SNP_18487 | 1044 | A | G | 6  | 3  | -- | --  |
| CakTC38048 | Ca(ICCV2/PI489777)SNP_18488 | 851  | C | G | 8  | 8  | -- | --  |
| CakTC37075 | Ca(ICCV2/PI489777)SNP_18489 | 1159 | A | T | 15 | 17 | -- | --  |
| CakTC32443 | Ca(ICCV2/PI489777)SNP_18490 | 61   | G | A | 4  | 3  | -- | --  |
|            | Ca(ICCV2/PI489777)SNP_18491 | 290  | G | C | 5  | 6  | -- | --  |
|            | Ca(ICCV2/PI489777)SNP_18492 | 326  | A | T | 5  | 6  | -- | --  |
|            | Ca(ICCV2/PI489777)SNP_18493 | 1055 | A | T | 3  | 5  | -- | --  |
| CakTC40814 | Ca(ICCV2/PI489777)SNP_18494 | 142  | C | T | 10 | 23 | -- | --  |
|            | Ca(ICCV2/PI489777)SNP_18495 | 425  | C | T | 4  | 21 | -- | --  |

|            |                            |      |   |   |    |    |        |             |
|------------|----------------------------|------|---|---|----|----|--------|-------------|
|            | Ca(ICC2/PI489777)SNP_18496 | 435  | C | T | 5  | 24 | --     | --          |
|            | Ca(ICC2/PI489777)SNP_18497 | 473  | T | C | 5  | 27 | --     | --          |
| CakTC24761 | Ca(ICC2/PI489777)SNP_18498 | 1675 | C | T | 24 | 16 | --     | --          |
| CakTC32879 | Ca(ICC2/PI489777)SNP_18499 | 162  | A | C | 3  | 3  | --     | --          |
|            | Ca(ICC2/PI489777)SNP_18500 | 193  | C | A | 3  | 3  | --     | --          |
| CakTC38186 | Ca(ICC2/PI489777)SNP_18501 | 262  | C | T | 9  | 6  | --     | --          |
|            | Ca(ICC2/PI489777)SNP_18502 | 340  | T | C | 7  | 5  | --     | --          |
|            | Ca(ICC2/PI489777)SNP_18503 | 613  | T | G | 10 | 4  | --     | --          |
|            | Ca(ICC2/PI489777)SNP_18504 | 685  | A | G | 8  | 5  | --     | --          |
|            | Ca(ICC2/PI489777)SNP_18505 | 753  | G | C | 11 | 4  | --     | --          |
|            | Ca(ICC2/PI489777)SNP_18506 | 1063 | T | C | 7  | 7  | --     | --          |
| CakTC23464 | Ca(ICC2/PI489777)SNP_18507 | 177  | T | C | 9  | 7  | --     | --          |
|            | Ca(ICC2/PI489777)SNP_18508 | 692  | C | G | 8  | 8  | --     | --          |
| CakTC24072 | Ca(ICC2/PI489777)SNP_18509 | 1113 | A | G | 65 | 28 | --     | Bromodomain |
|            | Ca(ICC2/PI489777)SNP_18510 | 1315 | G | T | 62 | 19 | --     | Bromodomain |
|            | Ca(ICC2/PI489777)SNP_18511 | 2097 | G | T | 58 | 21 | --     | Bromodomain |
|            | Ca(ICC2/PI489777)SNP_18512 | 2377 | A | C | 42 | 16 | --     | Bromodomain |
| CakTC40100 | Ca(ICC2/PI489777)SNP_18513 | 1261 | G | C | 9  | 12 | Flower | bud         |
| CakTC28855 | Ca(ICC2/PI489777)SNP_18514 | 175  | T | A | 16 | 9  | --     | --          |
|            | Ca(ICC2/PI489777)SNP_18515 | 223  | G | T | 17 | 11 | --     | --          |
|            | Ca(ICC2/PI489777)SNP_18516 | 258  | G | A | 15 | 12 | --     | --          |
|            | Ca(ICC2/PI489777)SNP_18517 | 808  | C | T | 5  | 6  | --     | --          |
| CakTC24230 | Ca(ICC2/PI489777)SNP_18518 | 373  | C | T | 4  | 3  | --     | --          |
| CakTC33430 | Ca(ICC2/PI489777)SNP_18519 | 55   | A | C | 21 | 12 | --     | --          |
|            | Ca(ICC2/PI489777)SNP_18520 | 101  | A | C | 41 | 23 | --     | --          |
|            | Ca(ICC2/PI489777)SNP_18521 | 571  | T | A | 24 | 22 | --     | --          |
|            | Ca(ICC2/PI489777)SNP_18522 | 618  | G | T | 8  | 4  | --     | --          |
| CakTC37953 | Ca(ICC2/PI489777)SNP_18523 | 1072 | A | G | 10 | 12 | --     | --          |
| CakTC40376 | Ca(ICC2/PI489777)SNP_18524 | 358  | A | G | 13 | 12 | --     | --          |
|            | Ca(ICC2/PI489777)SNP_18525 | 376  | C | T | 12 | 8  | --     | --          |
|            | Ca(ICC2/PI489777)SNP_18526 | 463  | G | C | 11 | 12 | --     | --          |
|            | Ca(ICC2/PI489777)SNP_18527 | 697  | A | G | 6  | 9  | --     | --          |
| CakTC34411 | Ca(ICC2/PI489777)SNP_18528 | 286  | G | A | 4  | 6  | Flower | bud         |
|            | Ca(ICC2/PI489777)SNP_18529 | 628  | C | A | 5  | 5  | Flower | bud         |
| CakTC42444 | Ca(ICC2/PI489777)SNP_18530 | 233  | T | C | 32 | 16 | --     | --          |
|            | Ca(ICC2/PI489777)SNP_18531 | 555  | C | T | 33 | 16 | --     | --          |
|            | Ca(ICC2/PI489777)SNP_18532 | 831  | A | G | 17 | 7  | --     | --          |
|            | Ca(ICC2/PI489777)SNP_18533 | 884  | T | C | 6  | 4  | --     | --          |
|            | Ca(ICC2/PI489777)SNP_18534 | 890  | T | C | 6  | 3  | --     | --          |
|            | Ca(ICC2/PI489777)SNP_18535 | 895  | T | C | 6  | 4  | --     | --          |
|            | Ca(ICC2/PI489777)SNP_18536 | 901  | A | G | 6  | 4  | --     | --          |
|            | Ca(ICC2/PI489777)SNP_18537 | 907  | A | G | 6  | 4  | --     | --          |
| CakTC42630 | Ca(ICC2/PI489777)SNP_18538 | 651  | T | G | 13 | 8  | --     | --          |
| CakTC43308 | Ca(ICC2/PI489777)SNP_18539 | 40   | A | C | 8  | 3  | --     | --          |
|            | Ca(ICC2/PI489777)SNP_18540 | 111  | T | C | 9  | 6  | --     | --          |
|            | Ca(ICC2/PI489777)SNP_18541 | 181  | T | A | 12 | 7  | --     | --          |
|            | Ca(ICC2/PI489777)SNP_18542 | 513  | G | A | 5  | 5  | --     | --          |
|            | Ca(ICC2/PI489777)SNP_18543 | 542  | G | T | 5  | 4  | --     | --          |
| CakTC28141 | Ca(ICC2/PI489777)SNP_18544 | 72   | T | C | 9  | 9  | --     | --          |
|            | Ca(ICC2/PI489777)SNP_18545 | 780  | C | T | 18 | 15 | --     | --          |
|            | Ca(ICC2/PI489777)SNP_18546 | 1179 | T | C | 31 | 20 | --     | --          |
|            | Ca(ICC2/PI489777)SNP_18547 | 1248 | A | G | 22 | 21 | --     | --          |
|            | Ca(ICC2/PI489777)SNP_18548 | 1281 | T | A | 21 | 17 | --     | --          |
|            | Ca(ICC2/PI489777)SNP_18549 | 1524 | C | T | 21 | 13 | --     | --          |
|            | Ca(ICC2/PI489777)SNP_18550 | 1624 | T | C | 20 | 8  | --     | --          |
|            | Ca(ICC2/PI489777)SNP_18551 | 1678 | G | A | 15 | 11 | --     | --          |
|            | Ca(ICC2/PI489777)SNP_18552 | 1734 | A | G | 18 | 8  | --     | --          |
|            | Ca(ICC2/PI489777)SNP_18553 | 1873 | C | G | 8  | 3  | --     | --          |
| CakTC26854 | Ca(ICC2/PI489777)SNP_18554 | 312  | A | G | 17 | 9  | --     | --          |
|            | Ca(ICC2/PI489777)SNP_18555 | 372  | A | G | 25 | 12 | --     | --          |
|            | Ca(ICC2/PI489777)SNP_18556 | 399  | A | G | 23 | 15 | --     | --          |
|            | Ca(ICC2/PI489777)SNP_18557 | 429  | T | C | 24 | 13 | --     | --          |
|            | Ca(ICC2/PI489777)SNP_18558 | 612  | G | A | 15 | 11 | --     | --          |
|            | Ca(ICC2/PI489777)SNP_18559 | 1042 | T | A | 27 | 5  | --     | --          |
|            | Ca(ICC2/PI489777)SNP_18560 | 1065 | C | T | 25 | 5  | --     | --          |
|            | Ca(ICC2/PI489777)SNP_18561 | 1113 | G | A | 27 | 4  | --     | --          |
|            | Ca(ICC2/PI489777)SNP_18562 | 1272 | T | A | 19 | 3  | --     | --          |
|            | Ca(ICC2/PI489777)SNP_18563 | 1283 | C | T | 22 | 3  | --     | --          |
|            | Ca(ICC2/PI489777)SNP_18564 | 1650 | G | C | 17 | 10 | --     | --          |
|            | Ca(ICC2/PI489777)SNP_18565 | 2808 | T | A | 19 | 10 | --     | --          |
|            | Ca(ICC2/PI489777)SNP_18566 | 2813 | C | T | 19 | 10 | --     | --          |
|            | Ca(ICC2/PI489777)SNP_18567 | 2830 | C | G | 19 | 9  | --     | --          |
|            | Ca(ICC2/PI489777)SNP_18568 | 2896 | G | C | 10 | 8  | --     | --          |
|            | Ca(ICC2/PI489777)SNP_18569 | 2997 | C | G | 8  | 4  | --     | --          |

|            |                            |      |   |   |    |     |        |      |
|------------|----------------------------|------|---|---|----|-----|--------|------|
| CakTC38658 | Ca(ICC2/PI489777)SNP_18570 | 131  | T | A | 36 | 50  | --     | --   |
|            | Ca(ICC2/PI489777)SNP_18571 | 191  | C | T | 65 | 93  | --     | --   |
|            | Ca(ICC2/PI489777)SNP_18572 | 209  | A | C | 79 | 77  | --     | --   |
|            | Ca(ICC2/PI489777)SNP_18573 | 226  | C | G | 64 | 87  | --     | --   |
|            | Ca(ICC2/PI489777)SNP_18574 | 403  | A | C | 86 | 108 | --     | --   |
|            | Ca(ICC2/PI489777)SNP_18575 | 433  | G | A | 82 | 112 | --     | --   |
| CakTC42445 | Ca(ICC2/PI489777)SNP_18576 | 671  | T | G | 11 | 5   | --     | --   |
|            | Ca(ICC2/PI489777)SNP_18577 | 805  | T | A | 13 | 5   | --     | --   |
|            | Ca(ICC2/PI489777)SNP_18578 | 824  | C | T | 13 | 4   | --     | --   |
| CakTC39030 | Ca(ICC2/PI489777)SNP_18579 | 119  | T | G | 10 | 5   | --     | --   |
|            | Ca(ICC2/PI489777)SNP_18580 | 965  | C | G | 5  | 12  | --     | --   |
| CakTC35189 | Ca(ICC2/PI489777)SNP_18581 | 411  | C | T | 16 | 8   | --     | --   |
|            | Ca(ICC2/PI489777)SNP_18582 | 783  | T | A | 11 | 4   | --     | --   |
|            | Ca(ICC2/PI489777)SNP_18583 | 1695 | G | A | 5  | 6   | --     | --   |
|            | Ca(ICC2/PI489777)SNP_18584 | 2637 | A | T | 9  | 6   | --     | --   |
| CakTC24577 | Ca(ICC2/PI489777)SNP_18585 | 1615 | A | G | 8  | 3   | Root   | --   |
|            | Ca(ICC2/PI489777)SNP_18586 | 1942 | A | C | 15 | 5   | Root   | --   |
|            | Ca(ICC2/PI489777)SNP_18587 | 2256 | C | G | 8  | 4   | Root   | --   |
| CakTC43327 | Ca(ICC2/PI489777)SNP_18588 | 806  | G | A | 3  | 4   | --     | --   |
|            | Ca(ICC2/PI489777)SNP_18589 | 914  | G | A | 4  | 4   | --     | --   |
| CakTC26980 | Ca(ICC2/PI489777)SNP_18590 | 2703 | G | A | 6  | 8   | Flower | bud  |
|            | Ca(ICC2/PI489777)SNP_18591 | 3633 | A | G | 10 | 4   | Flower | bud  |
| CakTC01786 | Ca(ICC2/PI489777)SNP_18592 | 153  | T | A | 10 | 3   | --     | --   |
|            | Ca(ICC2/PI489777)SNP_18593 | 229  | T | G | 9  | 3   | --     | --   |
| CakTC26491 | Ca(ICC2/PI489777)SNP_18594 | 227  | T | C | 7  | 4   | --     | --   |
| CakTC25847 | Ca(ICC2/PI489777)SNP_18595 | 130  | C | T | 10 | 10  | --     | --   |
|            | Ca(ICC2/PI489777)SNP_18596 | 556  | G | T | 22 | 5   | --     | --   |
|            | Ca(ICC2/PI489777)SNP_18597 | 658  | T | C | 28 | 16  | --     | --   |
|            | Ca(ICC2/PI489777)SNP_18598 | 1071 | A | C | 61 | 32  | --     | --   |
|            | Ca(ICC2/PI489777)SNP_18599 | 1363 | G | A | 52 | 26  | --     | --   |
|            | Ca(ICC2/PI489777)SNP_18600 | 1618 | C | T | 31 | 15  | --     | --   |
|            | Ca(ICC2/PI489777)SNP_18601 | 1805 | G | A | 30 | 6   | --     | --   |
|            | Ca(ICC2/PI489777)SNP_18602 | 1872 | G | A | 27 | 5   | --     | --   |
|            | Ca(ICC2/PI489777)SNP_18603 | 1924 | C | T | 13 | 4   | --     | --   |
| CakTC36304 | Ca(ICC2/PI489777)SNP_18604 | 12   | C | T | 3  | 5   | --     | --   |
|            | Ca(ICC2/PI489777)SNP_18605 | 31   | C | A | 7  | 7   | --     | --   |
|            | Ca(ICC2/PI489777)SNP_18606 | 77   | T | G | 8  | 10  | --     | --   |
|            | Ca(ICC2/PI489777)SNP_18607 | 341  | A | G | 6  | 11  | --     | --   |
|            | Ca(ICC2/PI489777)SNP_18608 | 1133 | T | A | 3  | 11  | --     | --   |
|            | Ca(ICC2/PI489777)SNP_18609 | 1577 | C | T | 12 | 8   | --     | --   |
|            | Ca(ICC2/PI489777)SNP_18610 | 1715 | G | A | 9  | 6   | --     | --   |
|            | Ca(ICC2/PI489777)SNP_18611 | 1727 | C | T | 11 | 6   | --     | --   |
| CakTC41493 | Ca(ICC2/PI489777)SNP_18612 | 168  | C | T | 9  | 9   | --     | --   |
| CakTC42786 | Ca(ICC2/PI489777)SNP_18613 | 373  | G | T | 12 | 10  | --     | --   |
|            | Ca(ICC2/PI489777)SNP_18614 | 973  | C | T | 13 | 4   | --     | --   |
|            | Ca(ICC2/PI489777)SNP_18615 | 1051 | C | T | 13 | 6   | --     | --   |
| CakTC07019 | Ca(ICC2/PI489777)SNP_18616 | 289  | A | G | 29 | 13  | --     | --   |
|            | Ca(ICC2/PI489777)SNP_18617 | 295  | G | A | 36 | 14  | --     | --   |
|            | Ca(ICC2/PI489777)SNP_18618 | 412  | T | C | 57 | 22  | --     | --   |
|            | Ca(ICC2/PI489777)SNP_18619 | 523  | A | G | 61 | 18  | --     | --   |
|            | Ca(ICC2/PI489777)SNP_18620 | 715  | G | C | 43 | 5   | --     | --   |
| CakTC23367 | Ca(ICC2/PI489777)SNP_18621 | 1861 | T | C | 11 | 11  | --     | NAC  |
|            | Ca(ICC2/PI489777)SNP_18622 | 1940 | C | A | 11 | 10  | --     | NAC  |
| CakTC27095 | Ca(ICC2/PI489777)SNP_18623 | 551  | C | G | 23 | 4   | --     | --   |
|            | Ca(ICC2/PI489777)SNP_18624 | 700  | C | T | 24 | 3   | --     | --   |
| CakTC29865 | Ca(ICC2/PI489777)SNP_18625 | 216  | C | T | 8  | 7   | --     | --   |
|            | Ca(ICC2/PI489777)SNP_18626 | 996  | C | T | 37 | 9   | --     | --   |
|            | Ca(ICC2/PI489777)SNP_18627 | 1143 | A | G | 30 | 8   | --     | --   |
| CakTC20440 | Ca(ICC2/PI489777)SNP_18628 | 687  | T | C | 16 | 5   | --     | --   |
| CakTC24567 | Ca(ICC2/PI489777)SNP_18629 | 1127 | C | T | 15 | 16  | --     | --   |
| CakTC09824 | Ca(ICC2/PI489777)SNP_18630 | 461  | C | G | 8  | 6   | --     | --   |
|            | Ca(ICC2/PI489777)SNP_18631 | 989  | C | T | 3  | 3   | --     | --   |
| CakTC42548 | Ca(ICC2/PI489777)SNP_18632 | 53   | G | T | 8  | 5   | --     | --   |
|            | Ca(ICC2/PI489777)SNP_18633 | 126  | G | A | 10 | 9   | --     | --   |
|            | Ca(ICC2/PI489777)SNP_18634 | 337  | T | A | 13 | 13  | --     | --   |
|            | Ca(ICC2/PI489777)SNP_18635 | 1192 | A | G | 10 | 5   | --     | --   |
| CakTC42644 | Ca(ICC2/PI489777)SNP_18636 | 204  | T | C | 11 | 6   | --     | --   |
|            | Ca(ICC2/PI489777)SNP_18637 | 351  | C | G | 26 | 7   | --     | --   |
|            | Ca(ICC2/PI489777)SNP_18638 | 381  | A | G | 29 | 8   | --     | --   |
|            | Ca(ICC2/PI489777)SNP_18639 | 579  | A | G | 15 | 4   | --     | --   |
|            | Ca(ICC2/PI489777)SNP_18640 | 626  | C | T | 12 | 3   | --     | --   |
|            | Ca(ICC2/PI489777)SNP_18641 | 823  | C | T | 8  | 4   | --     | --   |
| CakTC24522 | Ca(ICC2/PI489777)SNP_18642 | 887  | C | T | 6  | 4   | --     | BSD  |
| CakTC26203 | Ca(ICC2/PI489777)SNP_18643 | 748  | A | G | 6  | 4   | --     | BES1 |

|            |                            |      |   |   |    |    |    |           |
|------------|----------------------------|------|---|---|----|----|----|-----------|
|            | Ca(ICC2/PI489777)SNP_18644 | 778  | A | G | 7  | 4  | -- | BES1      |
|            | Ca(ICC2/PI489777)SNP_18645 | 1154 | G | A | 6  | 5  | -- | BES1      |
|            | Ca(ICC2/PI489777)SNP_18646 | 1486 | C | A | 3  | 7  | -- | BES1      |
|            | Ca(ICC2/PI489777)SNP_18647 | 1495 | T | C | 3  | 7  | -- | BES1      |
| CakTC37388 | Ca(ICC2/PI489777)SNP_18648 | 358  | T | G | 12 | 12 | -- | --        |
|            | Ca(ICC2/PI489777)SNP_18649 | 1422 | A | G | 8  | 9  | -- | --        |
|            | Ca(ICC2/PI489777)SNP_18650 | 1548 | C | G | 5  | 8  | -- | --        |
| CakTC27403 | Ca(ICC2/PI489777)SNP_18651 | 580  | A | G | 7  | 3  | -- | --        |
| CakTC33793 | Ca(ICC2/PI489777)SNP_18652 | 353  | A | T | 19 | 3  | -- | --        |
|            | Ca(ICC2/PI489777)SNP_18653 | 1074 | A | G | 29 | 10 | -- | --        |
|            | Ca(ICC2/PI489777)SNP_18654 | 2192 | T | G | 9  | 6  | -- | --        |
|            | Ca(ICC2/PI489777)SNP_18655 | 2207 | A | G | 7  | 6  | -- | --        |
| CakTC36981 | Ca(ICC2/PI489777)SNP_18656 | 332  | A | G | 7  | 4  | -- | --        |
|            | Ca(ICC2/PI489777)SNP_18657 | 337  | T | C | 7  | 3  | -- | --        |
| CakTC42304 | Ca(ICC2/PI489777)SNP_18658 | 1501 | A | G | 10 | 8  | -- | --        |
| CakTC25852 | Ca(ICC2/PI489777)SNP_18659 | 657  | C | A | 12 | 4  | -- | --        |
| CakTC40228 | Ca(ICC2/PI489777)SNP_18660 | 1336 | T | G | 13 | 6  | -- | --        |
|            | Ca(ICC2/PI489777)SNP_18661 | 1342 | G | T | 12 | 7  | -- | --        |
| CakTC29310 | Ca(ICC2/PI489777)SNP_18662 | 182  | T | A | 12 | 18 | -- | --        |
|            | Ca(ICC2/PI489777)SNP_18663 | 531  | T | C | 18 | 19 | -- | --        |
| CakTC28801 | Ca(ICC2/PI489777)SNP_18664 | 142  | C | G | 5  | 3  | -- | --        |
|            | Ca(ICC2/PI489777)SNP_18665 | 217  | A | G | 7  | 3  | -- | --        |
|            | Ca(ICC2/PI489777)SNP_18666 | 309  | C | G | 7  | 4  | -- | --        |
|            | Ca(ICC2/PI489777)SNP_18667 | 423  | A | G | 7  | 3  | -- | --        |
|            | Ca(ICC2/PI489777)SNP_18668 | 933  | T | C | 4  | 16 | -- | --        |
|            | Ca(ICC2/PI489777)SNP_18669 | 948  | G | A | 4  | 16 | -- | --        |
| CakTC13631 | Ca(ICC2/PI489777)SNP_18670 | 712  | A | G | 3  | 3  | -- | --        |
|            | Ca(ICC2/PI489777)SNP_18671 | 831  | T | C | 6  | 10 | -- | --        |
|            | Ca(ICC2/PI489777)SNP_18672 | 860  | C | A | 7  | 10 | -- | --        |
|            | Ca(ICC2/PI489777)SNP_18673 | 917  | A | T | 6  | 15 | -- | --        |
|            | Ca(ICC2/PI489777)SNP_18674 | 986  | C | T | 9  | 13 | -- | --        |
|            | Ca(ICC2/PI489777)SNP_18675 | 1424 | G | C | 8  | 15 | -- | --        |
| CakTC30513 | Ca(ICC2/PI489777)SNP_18676 | 1780 | G | C | 41 | 7  | -- | --        |
|            | Ca(ICC2/PI489777)SNP_18677 | 1962 | A | C | 7  | 3  | -- | --        |
|            | Ca(ICC2/PI489777)SNP_18678 | 2843 | A | C | 14 | 7  | -- | --        |
|            | Ca(ICC2/PI489777)SNP_18679 | 3057 | C | A | 9  | 3  | -- | --        |
|            | Ca(ICC2/PI489777)SNP_18680 | 3731 | C | A | 4  | 5  | -- | --        |
| CakTC31829 | Ca(ICC2/PI489777)SNP_18681 | 925  | G | A | 7  | 5  | -- | AP2-EREBP |
| CakTC26836 | Ca(ICC2/PI489777)SNP_18682 | 164  | G | T | 33 | 11 | -- | --        |
|            | Ca(ICC2/PI489777)SNP_18683 | 706  | T | C | 53 | 30 | -- | --        |
|            | Ca(ICC2/PI489777)SNP_18684 | 1117 | T | C | 69 | 48 | -- | --        |
|            | Ca(ICC2/PI489777)SNP_18685 | 1255 | C | A | 48 | 32 | -- | --        |
|            | Ca(ICC2/PI489777)SNP_18686 | 1486 | G | A | 29 | 20 | -- | --        |
|            | Ca(ICC2/PI489777)SNP_18687 | 1800 | C | T | 7  | 4  | -- | --        |
|            | Ca(ICC2/PI489777)SNP_18688 | 1827 | C | T | 6  | 4  | -- | --        |
| CakTC41338 | Ca(ICC2/PI489777)SNP_18689 | 253  | C | T | 31 | 74 | -- | --        |
|            | Ca(ICC2/PI489777)SNP_18690 | 549  | T | C | 11 | 9  | -- | --        |
| CakTC38651 | Ca(ICC2/PI489777)SNP_18691 | 53   | T | C | 14 | 6  | -- | --        |
|            | Ca(ICC2/PI489777)SNP_18692 | 200  | T | A | 38 | 15 | -- | --        |
|            | Ca(ICC2/PI489777)SNP_18693 | 249  | C | A | 44 | 20 | -- | --        |
|            | Ca(ICC2/PI489777)SNP_18694 | 412  | T | C | 49 | 21 | -- | --        |
|            | Ca(ICC2/PI489777)SNP_18695 | 535  | G | C | 34 | 13 | -- | --        |
|            | Ca(ICC2/PI489777)SNP_18696 | 673  | C | T | 47 | 7  | -- | --        |
|            | Ca(ICC2/PI489777)SNP_18697 | 1336 | A | G | 30 | 16 | -- | --        |
|            | Ca(ICC2/PI489777)SNP_18698 | 1453 | A | G | 38 | 16 | -- | --        |
| CakTC39886 | Ca(ICC2/PI489777)SNP_18699 | 1094 | T | C | 11 | 4  | -- | --        |
| CakTC40000 | Ca(ICC2/PI489777)SNP_18700 | 665  | A | G | 13 | 4  | -- | LOB       |
| CakTC27390 | Ca(ICC2/PI489777)SNP_18701 | 2059 | A | T | 13 | 9  | -- | NAC       |
|            | Ca(ICC2/PI489777)SNP_18702 | 2078 | A | G | 9  | 7  | -- | NAC       |
|            | Ca(ICC2/PI489777)SNP_18703 | 2091 | C | T | 4  | 5  | -- | NAC       |
| CakTC22864 | Ca(ICC2/PI489777)SNP_18704 | 954  | C | T | 5  | 3  | -- | GNAT      |
| CakTC34844 | Ca(ICC2/PI489777)SNP_18705 | 1371 | C | A | 16 | 5  | -- | --        |
|            | Ca(ICC2/PI489777)SNP_18706 | 2013 | G | A | 14 | 7  | -- | --        |
|            | Ca(ICC2/PI489777)SNP_18707 | 2765 | T | C | 8  | 5  | -- | --        |
|            | Ca(ICC2/PI489777)SNP_18708 | 2839 | A | T | 9  | 6  | -- | --        |
|            | Ca(ICC2/PI489777)SNP_18709 | 3146 | C | A | 7  | 4  | -- | --        |
|            | Ca(ICC2/PI489777)SNP_18710 | 3563 | T | A | 3  | 5  | -- | --        |
|            | Ca(ICC2/PI489777)SNP_18711 | 3696 | G | C | 4  | 5  | -- | --        |
| CakTC24550 | Ca(ICC2/PI489777)SNP_18712 | 932  | A | G | 23 | 4  | -- | --        |
|            | Ca(ICC2/PI489777)SNP_18713 | 1272 | T | C | 13 | 4  | -- | --        |
|            | Ca(ICC2/PI489777)SNP_18714 | 1877 | A | G | 13 | 11 | -- | --        |
| CakTC26339 | Ca(ICC2/PI489777)SNP_18715 | 1240 | G | A | 14 | 13 | -- | --        |
| CakTC04806 | Ca(ICC2/PI489777)SNP_18716 | 172  | A | G | 3  | 4  | -- | --        |
|            | Ca(ICC2/PI489777)SNP_18717 | 1039 | T | C | 4  | 4  | -- | --        |

|            |                            |      |   |   |    |    |    |     |
|------------|----------------------------|------|---|---|----|----|----|-----|
|            | Ca(ICC2/PI489777)SNP_18718 | 1057 | G | A | 5  | 4  | -- | --  |
| CakTC28389 | Ca(ICC2/PI489777)SNP_18719 | 227  | G | C | 3  | 6  | -- | C3H |
| CakTC41257 | Ca(ICC2/PI489777)SNP_18720 | 272  | G | C | 26 | 14 | -- | --  |
| CakTC26434 | Ca(ICC2/PI489777)SNP_18721 | 367  | T | C | 29 | 15 | -- | --  |
| CakTC09960 | Ca(ICC2/PI489777)SNP_18722 | 41   | T | C | 30 | 23 | -- | --  |
|            | Ca(ICC2/PI489777)SNP_18723 | 67   | A | G | 32 | 23 | -- | --  |
|            | Ca(ICC2/PI489777)SNP_18724 | 95   | T | G | 33 | 25 | -- | --  |
|            | Ca(ICC2/PI489777)SNP_18725 | 105  | G | A | 33 | 24 | -- | --  |
|            | Ca(ICC2/PI489777)SNP_18726 | 110  | T | C | 32 | 24 | -- | --  |
|            | Ca(ICC2/PI489777)SNP_18727 | 119  | G | A | 36 | 22 | -- | --  |
|            | Ca(ICC2/PI489777)SNP_18728 | 155  | C | T | 35 | 28 | -- | --  |
|            | Ca(ICC2/PI489777)SNP_18729 | 158  | A | T | 36 | 27 | -- | --  |
|            | Ca(ICC2/PI489777)SNP_18730 | 216  | C | T | 31 | 27 | -- | --  |
|            | Ca(ICC2/PI489777)SNP_18731 | 251  | T | G | 28 | 21 | -- | --  |
|            | Ca(ICC2/PI489777)SNP_18732 | 263  | G | C | 29 | 26 | -- | --  |
|            | Ca(ICC2/PI489777)SNP_18733 | 272  | G | T | 27 | 26 | -- | --  |
|            | Ca(ICC2/PI489777)SNP_18734 | 326  | C | G | 26 | 23 | -- | --  |
|            | Ca(ICC2/PI489777)SNP_18735 | 470  | A | T | 18 | 17 | -- | --  |
|            | Ca(ICC2/PI489777)SNP_18736 | 656  | T | G | 17 | 25 | -- | --  |
|            | Ca(ICC2/PI489777)SNP_18737 | 774  | A | G | 33 | 31 | -- | --  |
|            | Ca(ICC2/PI489777)SNP_18738 | 1022 | A | T | 24 | 10 | -- | --  |
|            | Ca(ICC2/PI489777)SNP_18739 | 1049 | C | A | 15 | 10 | -- | --  |
|            | Ca(ICC2/PI489777)SNP_18740 | 1069 | A | G | 13 | 9  | -- | --  |
|            | Ca(ICC2/PI489777)SNP_18741 | 1078 | A | C | 12 | 6  | -- | --  |
|            | Ca(ICC2/PI489777)SNP_18742 | 1088 | T | A | 10 | 4  | -- | --  |
| CakTC25378 | Ca(ICC2/PI489777)SNP_18743 | 963  | A | G | 10 | 12 | -- | --  |
|            | Ca(ICC2/PI489777)SNP_18744 | 1161 | G | A | 3  | 4  | -- | --  |
|            | Ca(ICC2/PI489777)SNP_18745 | 1863 | A | C | 6  | 4  | -- | --  |
|            | Ca(ICC2/PI489777)SNP_18746 | 1896 | A | T | 6  | 5  | -- | --  |
|            | Ca(ICC2/PI489777)SNP_18747 | 2046 | T | G | 11 | 5  | -- | --  |
|            | Ca(ICC2/PI489777)SNP_18748 | 2064 | G | A | 10 | 6  | -- | --  |
|            | Ca(ICC2/PI489777)SNP_18749 | 2273 | A | G | 9  | 3  | -- | --  |
|            | Ca(ICC2/PI489777)SNP_18750 | 2275 | G | T | 9  | 3  | -- | --  |
| CakTC38953 | Ca(ICC2/PI489777)SNP_18751 | 455  | G | A | 4  | 3  | -- | --  |
|            | Ca(ICC2/PI489777)SNP_18752 | 629  | G | C | 4  | 3  | -- | --  |
| CakTC26470 | Ca(ICC2/PI489777)SNP_18753 | 473  | T | A | 3  | 3  | -- | --  |
| CakTC30630 | Ca(ICC2/PI489777)SNP_18754 | 999  | A | T | 6  | 3  | -- | --  |
|            | Ca(ICC2/PI489777)SNP_18755 | 1093 | C | A | 6  | 3  | -- | --  |
|            | Ca(ICC2/PI489777)SNP_18756 | 1416 | A | G | 6  | 5  | -- | --  |
| CakTC40552 | Ca(ICC2/PI489777)SNP_18757 | 292  | T | C | 9  | 3  | -- | --  |
| CakTC38859 | Ca(ICC2/PI489777)SNP_18758 | 134  | A | G | 29 | 20 | -- | --  |
|            | Ca(ICC2/PI489777)SNP_18759 | 396  | G | C | 33 | 28 | -- | --  |
|            | Ca(ICC2/PI489777)SNP_18760 | 401  | A | G | 34 | 29 | -- | --  |
|            | Ca(ICC2/PI489777)SNP_18761 | 522  | T | C | 24 | 22 | -- | --  |
| CakTC41061 | Ca(ICC2/PI489777)SNP_18762 | 259  | G | A | 8  | 3  | -- | --  |
|            | Ca(ICC2/PI489777)SNP_18763 | 413  | C | T | 6  | 3  | -- | --  |
| CakTC11432 | Ca(ICC2/PI489777)SNP_18764 | 183  | C | G | 55 | 8  | -- | --  |
|            | Ca(ICC2/PI489777)SNP_18765 | 375  | T | C | 67 | 11 | -- | --  |
|            | Ca(ICC2/PI489777)SNP_18766 | 486  | A | G | 52 | 13 | -- | --  |
|            | Ca(ICC2/PI489777)SNP_18767 | 603  | C | T | 39 | 10 | -- | --  |
|            | Ca(ICC2/PI489777)SNP_18768 | 609  | T | C | 36 | 10 | -- | --  |
|            | Ca(ICC2/PI489777)SNP_18769 | 1011 | T | G | 45 | 10 | -- | --  |
|            | Ca(ICC2/PI489777)SNP_18770 | 1012 | T | G | 45 | 10 | -- | --  |
|            | Ca(ICC2/PI489777)SNP_18771 | 1039 | G | T | 46 | 8  | -- | --  |
| CakTC38909 | Ca(ICC2/PI489777)SNP_18772 | 64   | A | T | 4  | 13 | -- | --  |
|            | Ca(ICC2/PI489777)SNP_18773 | 132  | C | A | 6  | 15 | -- | --  |
|            | Ca(ICC2/PI489777)SNP_18774 | 360  | C | T | 10 | 17 | -- | --  |
|            | Ca(ICC2/PI489777)SNP_18775 | 768  | T | C | 16 | 35 | -- | --  |
|            | Ca(ICC2/PI489777)SNP_18776 | 1386 | G | A | 5  | 5  | -- | --  |
| CakTC40146 | Ca(ICC2/PI489777)SNP_18777 | 1081 | G | T | 14 | 6  | -- | --  |
|            | Ca(ICC2/PI489777)SNP_18778 | 1165 | G | C | 14 | 5  | -- | --  |
|            | Ca(ICC2/PI489777)SNP_18779 | 1254 | T | A | 15 | 4  | -- | --  |
|            | Ca(ICC2/PI489777)SNP_18780 | 1255 | G | T | 16 | 4  | -- | --  |
|            | Ca(ICC2/PI489777)SNP_18781 | 1264 | T | G | 15 | 4  | -- | --  |
|            | Ca(ICC2/PI489777)SNP_18782 | 1365 | A | T | 7  | 3  | -- | --  |
|            | Ca(ICC2/PI489777)SNP_18783 | 1375 | G | A | 7  | 3  | -- | --  |
|            | Ca(ICC2/PI489777)SNP_18784 | 1438 | A | G | 3  | 3  | -- | --  |
| CakTC39248 | Ca(ICC2/PI489777)SNP_18785 | 435  | T | G | 12 | 7  | -- | --  |
|            | Ca(ICC2/PI489777)SNP_18786 | 581  | T | C | 14 | 6  | -- | --  |
|            | Ca(ICC2/PI489777)SNP_18787 | 1488 | T | A | 6  | 10 | -- | --  |
| CakTC29742 | Ca(ICC2/PI489777)SNP_18788 | 732  | C | T | 29 | 22 | -- | --  |
| CakTC28448 | Ca(ICC2/PI489777)SNP_18789 | 469  | C | A | 10 | 4  | -- | MYB |
|            | Ca(ICC2/PI489777)SNP_18790 | 669  | G | A | 16 | 9  | -- | MYB |
|            | Ca(ICC2/PI489777)SNP_18791 | 900  | T | C | 14 | 12 | -- | MYB |

|            |                            |      |   |   |     |     |           |     |
|------------|----------------------------|------|---|---|-----|-----|-----------|-----|
|            | Ca(ICC2/PI489777)SNP_18792 | 1285 | T | C | 27  | 14  | --        | MYB |
|            | Ca(ICC2/PI489777)SNP_18793 | 1393 | T | C | 17  | 10  | --        | MYB |
| CakTC24069 | Ca(ICC2/PI489777)SNP_18794 | 22   | A | G | 90  | 10  | --        | --  |
| CakTC38717 | Ca(ICC2/PI489777)SNP_18795 | 367  | A | C | 6   | 10  | --        | --  |
|            | Ca(ICC2/PI489777)SNP_18796 | 379  | G | T | 6   | 10  | --        | --  |
| CakTC40118 | Ca(ICC2/PI489777)SNP_18797 | 873  | T | C | 11  | 10  | --        | --  |
|            | Ca(ICC2/PI489777)SNP_18798 | 960  | T | C | 16  | 9   | --        | --  |
|            | Ca(ICC2/PI489777)SNP_18799 | 1020 | A | G | 17  | 8   | --        | --  |
|            | Ca(ICC2/PI489777)SNP_18800 | 1083 | G | C | 14  | 7   | --        | --  |
| CakTC30823 | Ca(ICC2/PI489777)SNP_18801 | 1065 | A | C | 14  | 7   | --        | --  |
|            | Ca(ICC2/PI489777)SNP_18802 | 1599 | A | G | 9   | 8   | --        | --  |
|            | Ca(ICC2/PI489777)SNP_18803 | 2238 | G | A | 15  | 3   | --        | --  |
|            | Ca(ICC2/PI489777)SNP_18804 | 3752 | A | T | 17  | 8   | --        | --  |
| CakTC40953 | Ca(ICC2/PI489777)SNP_18805 | 1511 | A | G | 9   | 6   | --        | --  |
|            | Ca(ICC2/PI489777)SNP_18806 | 1895 | C | T | 3   | 3   | --        | --  |
| CakTC31841 | Ca(ICC2/PI489777)SNP_18807 | 1079 | G | A | 3   | 4   | --        | ARF |
|            | Ca(ICC2/PI489777)SNP_18808 | 1376 | A | G | 4   | 5   | --        | ARF |
|            | Ca(ICC2/PI489777)SNP_18809 | 1386 | A | G | 5   | 5   | --        | ARF |
|            | Ca(ICC2/PI489777)SNP_18810 | 1391 | C | T | 5   | 5   | --        | ARF |
|            | Ca(ICC2/PI489777)SNP_18811 | 1496 | G | A | 5   | 5   | --        | ARF |
|            | Ca(ICC2/PI489777)SNP_18812 | 1716 | C | A | 14  | 4   | --        | ARF |
|            | Ca(ICC2/PI489777)SNP_18813 | 2009 | T | C | 14  | 6   | --        | ARF |
|            | Ca(ICC2/PI489777)SNP_18814 | 2295 | A | C | 17  | 6   | --        | ARF |
| CakTC34716 | Ca(ICC2/PI489777)SNP_18815 | 1562 | C | T | 19  | 14  | --        | --  |
|            | Ca(ICC2/PI489777)SNP_18816 | 2081 | A | G | 22  | 8   | --        | --  |
|            | Ca(ICC2/PI489777)SNP_18817 | 2972 | G | A | 14  | 4   | --        | --  |
|            | Ca(ICC2/PI489777)SNP_18818 | 3290 | T | A | 8   | 4   | --        | --  |
| CakTC42862 | Ca(ICC2/PI489777)SNP_18819 | 408  | T | C | 6   | 23  | --        | --  |
|            | Ca(ICC2/PI489777)SNP_18820 | 693  | G | T | 8   | 12  | --        | --  |
|            | Ca(ICC2/PI489777)SNP_18821 | 773  | G | A | 7   | 7   | --        | --  |
| CakTC25201 | Ca(ICC2/PI489777)SNP_18822 | 228  | G | A | 44  | 3   | --        | --  |
|            | Ca(ICC2/PI489777)SNP_18823 | 315  | C | T | 53  | 6   | --        | --  |
|            | Ca(ICC2/PI489777)SNP_18824 | 326  | C | A | 50  | 6   | --        | --  |
|            | Ca(ICC2/PI489777)SNP_18825 | 327  | A | G | 50  | 6   | --        | --  |
|            | Ca(ICC2/PI489777)SNP_18826 | 432  | T | G | 50  | 14  | --        | --  |
|            | Ca(ICC2/PI489777)SNP_18827 | 445  | G | T | 52  | 16  | --        | --  |
|            | Ca(ICC2/PI489777)SNP_18828 | 536  | C | T | 39  | 16  | --        | --  |
|            | Ca(ICC2/PI489777)SNP_18829 | 748  | T | G | 34  | 11  | --        | --  |
|            | Ca(ICC2/PI489777)SNP_18830 | 847  | C | T | 27  | 5   | --        | --  |
|            | Ca(ICC2/PI489777)SNP_18831 | 859  | C | T | 27  | 7   | --        | --  |
| CakTC41698 | Ca(ICC2/PI489777)SNP_18832 | 428  | G | C | 232 | 126 | --        | --  |
|            | Ca(ICC2/PI489777)SNP_18833 | 429  | T | C | 235 | 126 | --        | --  |
| CakTC24459 | Ca(ICC2/PI489777)SNP_18834 | 124  | T | A | 33  | 4   | --        | --  |
|            | Ca(ICC2/PI489777)SNP_18835 | 181  | C | T | 47  | 4   | --        | --  |
|            | Ca(ICC2/PI489777)SNP_18836 | 729  | C | G | 35  | 3   | --        | --  |
|            | Ca(ICC2/PI489777)SNP_18837 | 1883 | A | G | 30  | 3   | --        | --  |
| CakTC22814 | Ca(ICC2/PI489777)SNP_18838 | 550  | T | C | 7   | 3   | Shoot     | --  |
| CakTC32470 | Ca(ICC2/PI489777)SNP_18839 | 557  | T | C | 17  | 4   | --        | --  |
|            | Ca(ICC2/PI489777)SNP_18840 | 603  | T | C | 19  | 4   | --        | --  |
| CakTC37346 | Ca(ICC2/PI489777)SNP_18841 | 369  | A | G | 7   | 3   | --        | --  |
|            | Ca(ICC2/PI489777)SNP_18842 | 434  | A | T | 6   | 3   | --        | --  |
| CakTC36502 | Ca(ICC2/PI489777)SNP_18843 | 687  | T | C | 3   | 3   | --        | --  |
| CakTC41460 | Ca(ICC2/PI489777)SNP_18844 | 150  | C | T | 49  | 18  | --        | --  |
|            | Ca(ICC2/PI489777)SNP_18845 | 204  | T | C | 62  | 24  | --        | --  |
|            | Ca(ICC2/PI489777)SNP_18846 | 236  | A | G | 64  | 26  | --        | --  |
|            | Ca(ICC2/PI489777)SNP_18847 | 453  | A | G | 64  | 31  | --        | --  |
| CakTC08446 | Ca(ICC2/PI489777)SNP_18848 | 3689 | A | C | 4   | 4   | Young_pod | --  |
| CakTC30621 | Ca(ICC2/PI489777)SNP_18849 | 898  | A | C | 4   | 4   | --        | --  |
| CakTC41877 | Ca(ICC2/PI489777)SNP_18850 | 250  | G | A | 5   | 3   | --        | --  |
| CakTC26411 | Ca(ICC2/PI489777)SNP_18851 | 179  | G | A | 32  | 18  | --        | --  |
|            | Ca(ICC2/PI489777)SNP_18852 | 762  | T | G | 34  | 24  | --        | --  |
|            | Ca(ICC2/PI489777)SNP_18853 | 1422 | A | T | 52  | 24  | --        | --  |
| CakTC23964 | Ca(ICC2/PI489777)SNP_18854 | 109  | A | G | 4   | 3   | --        | --  |
|            | Ca(ICC2/PI489777)SNP_18855 | 923  | G | T | 55  | 14  | --        | --  |
|            | Ca(ICC2/PI489777)SNP_18856 | 1532 | G | T | 72  | 18  | --        | --  |
| CakTC36373 | Ca(ICC2/PI489777)SNP_18857 | 270  | A | C | 5   | 5   | --        | --  |
| CakTC15141 | Ca(ICC2/PI489777)SNP_18858 | 281  | C | T | 3   | 3   | --        | --  |
|            | Ca(ICC2/PI489777)SNP_18859 | 439  | C | T | 4   | 3   | --        | --  |
| CakTC22634 | Ca(ICC2/PI489777)SNP_18860 | 251  | C | T | 14  | 8   | --        | --  |
|            | Ca(ICC2/PI489777)SNP_18861 | 578  | C | T | 8   | 5   | --        | --  |
|            | Ca(ICC2/PI489777)SNP_18862 | 624  | A | C | 8   | 5   | --        | --  |
|            | Ca(ICC2/PI489777)SNP_18863 | 806  | T | C | 11  | 9   | --        | --  |
|            | Ca(ICC2/PI489777)SNP_18864 | 1467 | C | A | 4   | 4   | --        | --  |
| CakTC37799 | Ca(ICC2/PI489777)SNP_18865 | 359  | C | T | 25  | 13  | --        | SAP |

|            |                            |      |   |   |    |    |           |      |
|------------|----------------------------|------|---|---|----|----|-----------|------|
|            | Ca(ICC2/PI489777)SNP_18866 | 809  | C | T | 7  | 5  | --        | SAP  |
| CakTC29922 | Ca(ICC2/PI489777)SNP_18867 | 2149 | C | T | 7  | 6  | --        | --   |
| CakTC28152 | Ca(ICC2/PI489777)SNP_18868 | 463  | G | A | 13 | 3  | --        | --   |
|            | Ca(ICC2/PI489777)SNP_18869 | 1147 | C | T | 7  | 5  | --        | --   |
|            | Ca(ICC2/PI489777)SNP_18870 | 1382 | T | C | 8  | 4  | --        | --   |
|            | Ca(ICC2/PI489777)SNP_18871 | 1401 | G | C | 8  | 4  | --        | --   |
| CakTC36963 | Ca(ICC2/PI489777)SNP_18872 | 104  | T | G | 3  | 9  | --        | --   |
|            | Ca(ICC2/PI489777)SNP_18873 | 367  | C | T | 3  | 9  | --        | --   |
| CakTC13322 | Ca(ICC2/PI489777)SNP_18874 | 2914 | G | A | 7  | 4  | --        | --   |
| CakTC26885 | Ca(ICC2/PI489777)SNP_18875 | 201  | C | T | 9  | 4  | --        | --   |
|            | Ca(ICC2/PI489777)SNP_18876 | 317  | A | G | 10 | 8  | --        | --   |
|            | Ca(ICC2/PI489777)SNP_18877 | 424  | A | G | 10 | 8  | --        | --   |
| CakTC27086 | Ca(ICC2/PI489777)SNP_18878 | 853  | T | C | 41 | 34 | --        | --   |
|            | Ca(ICC2/PI489777)SNP_18879 | 1360 | T | C | 42 | 35 | --        | --   |
| CakTC11066 | Ca(ICC2/PI489777)SNP_18880 | 2107 | A | G | 8  | 4  | --        | --   |
|            | Ca(ICC2/PI489777)SNP_18881 | 2475 | G | C | 6  | 6  | --        | --   |
|            | Ca(ICC2/PI489777)SNP_18882 | 2697 | G | A | 6  | 3  | --        | --   |
| CakTC40853 | Ca(ICC2/PI489777)SNP_18883 | 1169 | A | G | 34 | 10 | --        | --   |
| CakTC29929 | Ca(ICC2/PI489777)SNP_18884 | 78   | C | T | 10 | 9  | --        | --   |
|            | Ca(ICC2/PI489777)SNP_18885 | 81   | T | G | 10 | 9  | --        | --   |
|            | Ca(ICC2/PI489777)SNP_18886 | 97   | A | T | 11 | 12 | --        | --   |
|            | Ca(ICC2/PI489777)SNP_18887 | 341  | C | T | 33 | 19 | --        | --   |
|            | Ca(ICC2/PI489777)SNP_18888 | 875  | T | C | 26 | 11 | --        | --   |
| CakTC08108 | Ca(ICC2/PI489777)SNP_18889 | 1444 | A | G | 6  | 13 | --        | --   |
|            | Ca(ICC2/PI489777)SNP_18890 | 1510 | A | G | 6  | 11 | --        | --   |
|            | Ca(ICC2/PI489777)SNP_18891 | 1516 | C | T | 5  | 11 | --        | --   |
|            | Ca(ICC2/PI489777)SNP_18892 | 1540 | A | G | 7  | 11 | --        | --   |
|            | Ca(ICC2/PI489777)SNP_18893 | 1618 | G | T | 7  | 9  | --        | --   |
| CakTC23958 | Ca(ICC2/PI489777)SNP_18894 | 68   | G | T | 9  | 13 | --        | --   |
|            | Ca(ICC2/PI489777)SNP_18895 | 344  | A | G | 14 | 13 | --        | --   |
| CakTC06975 | Ca(ICC2/PI489777)SNP_18896 | 1492 | T | C | 5  | 4  | --        | --   |
| CakTC43301 | Ca(ICC2/PI489777)SNP_18897 | 926  | T | C | 6  | 6  | --        | --   |
|            | Ca(ICC2/PI489777)SNP_18898 | 1033 | T | C | 6  | 3  | --        | --   |
|            | Ca(ICC2/PI489777)SNP_18899 | 1493 | G | A | 8  | 4  | --        | --   |
| CakTC38632 | Ca(ICC2/PI489777)SNP_18900 | 964  | A | G | 8  | 7  | --        | --   |
| CakTC40973 | Ca(ICC2/PI489777)SNP_18901 | 369  | T | A | 14 | 10 | --        | --   |
|            | Ca(ICC2/PI489777)SNP_18902 | 1089 | G | T | 24 | 15 | --        | --   |
|            | Ca(ICC2/PI489777)SNP_18903 | 1483 | G | A | 20 | 18 | --        | --   |
| CakTC42132 | Ca(ICC2/PI489777)SNP_18904 | 323  | A | G | 71 | 14 | --        | --   |
|            | Ca(ICC2/PI489777)SNP_18905 | 431  | T | C | 91 | 23 | --        | --   |
|            | Ca(ICC2/PI489777)SNP_18906 | 740  | G | A | 94 | 21 | --        | --   |
|            | Ca(ICC2/PI489777)SNP_18907 | 751  | T | A | 84 | 19 | --        | --   |
|            | Ca(ICC2/PI489777)SNP_18908 | 759  | G | T | 92 | 18 | --        | --   |
|            | Ca(ICC2/PI489777)SNP_18909 | 764  | C | T | 92 | 17 | --        | --   |
|            | Ca(ICC2/PI489777)SNP_18910 | 817  | T | A | 58 | 9  | --        | --   |
| CakTC30344 | Ca(ICC2/PI489777)SNP_18911 | 184  | C | T | 10 | 11 | --        | --   |
|            | Ca(ICC2/PI489777)SNP_18912 | 187  | C | T | 10 | 11 | --        | --   |
|            | Ca(ICC2/PI489777)SNP_18913 | 301  | C | A | 10 | 7  | --        | --   |
|            | Ca(ICC2/PI489777)SNP_18914 | 553  | G | T | 7  | 18 | --        | --   |
|            | Ca(ICC2/PI489777)SNP_18915 | 1045 | C | T | 6  | 15 | --        | --   |
|            | Ca(ICC2/PI489777)SNP_18916 | 1147 | A | T | 8  | 20 | --        | --   |
|            | Ca(ICC2/PI489777)SNP_18917 | 1471 | T | C | 8  | 11 | --        | --   |
| CakTC39473 | Ca(ICC2/PI489777)SNP_18918 | 1017 | C | T | 3  | 5  | --        | --   |
| CakTC25736 | Ca(ICC2/PI489777)SNP_18919 | 245  | T | A | 6  | 5  | Young_pod | --   |
|            | Ca(ICC2/PI489777)SNP_18920 | 942  | T | A | 3  | 31 | Young_pod | --   |
|            | Ca(ICC2/PI489777)SNP_18921 | 987  | A | T | 3  | 31 | Young_pod | --   |
| CakTC41823 | Ca(ICC2/PI489777)SNP_18922 | 196  | C | T | 11 | 12 | --        | --   |
|            | Ca(ICC2/PI489777)SNP_18923 | 250  | A | G | 10 | 13 | --        | --   |
|            | Ca(ICC2/PI489777)SNP_18924 | 262  | T | C | 13 | 13 | --        | --   |
|            | Ca(ICC2/PI489777)SNP_18925 | 296  | T | A | 14 | 13 | --        | --   |
|            | Ca(ICC2/PI489777)SNP_18926 | 709  | G | A | 25 | 5  | --        | --   |
| CakTC31210 | Ca(ICC2/PI489777)SNP_18927 | 159  | G | A | 24 | 7  | --        | --   |
|            | Ca(ICC2/PI489777)SNP_18928 | 245  | A | C | 34 | 10 | --        | --   |
|            | Ca(ICC2/PI489777)SNP_18929 | 377  | C | T | 30 | 10 | --        | --   |
| CakTC37267 | Ca(ICC2/PI489777)SNP_18930 | 67   | C | A | 5  | 8  | --        | --   |
|            | Ca(ICC2/PI489777)SNP_18931 | 309  | C | T | 9  | 18 | --        | --   |
|            | Ca(ICC2/PI489777)SNP_18932 | 522  | A | G | 6  | 36 | --        | --   |
|            | Ca(ICC2/PI489777)SNP_18933 | 693  | T | C | 21 | 37 | --        | --   |
|            | Ca(ICC2/PI489777)SNP_18934 | 711  | T | C | 14 | 34 | --        | --   |
| CakTC42803 | Ca(ICC2/PI489777)SNP_18935 | 113  | G | A | 29 | 11 | --        | MBF1 |
|            | Ca(ICC2/PI489777)SNP_18936 | 131  | A | G | 28 | 15 | --        | MBF1 |
|            | Ca(ICC2/PI489777)SNP_18937 | 362  | C | T | 80 | 57 | --        | MBF1 |
| CakTC25794 | Ca(ICC2/PI489777)SNP_18938 | 886  | C | G | 86 | 45 | --        | --   |
|            | Ca(ICC2/PI489777)SNP_18939 | 1518 | C | T | 41 | 49 | --        | --   |



|            |                            |      |   |   |     |     |           |       |
|------------|----------------------------|------|---|---|-----|-----|-----------|-------|
|            | Ca(ICC2/PI489777)SNP_18940 | 1635 | A | G | 33  | 40  | --        | --    |
| CakTC42204 | Ca(ICC2/PI489777)SNP_18941 | 148  | C | T | 36  | 14  | --        | --    |
|            | Ca(ICC2/PI489777)SNP_18942 | 183  | T | G | 20  | 17  | --        | --    |
|            | Ca(ICC2/PI489777)SNP_18943 | 442  | G | A | 44  | 20  | --        | --    |
|            | Ca(ICC2/PI489777)SNP_18944 | 652  | C | T | 15  | 10  | --        | --    |
|            | Ca(ICC2/PI489777)SNP_18945 | 667  | G | A | 15  | 10  | --        | --    |
|            | Ca(ICC2/PI489777)SNP_18946 | 676  | C | T | 14  | 10  | --        | --    |
|            | Ca(ICC2/PI489777)SNP_18947 | 691  | C | A | 12  | 9   | --        | --    |
|            | Ca(ICC2/PI489777)SNP_18948 | 773  | A | T | 7   | 8   | --        | --    |
|            | Ca(ICC2/PI489777)SNP_18949 | 807  | G | A | 6   | 8   | --        | --    |
| CakTC25874 | Ca(ICC2/PI489777)SNP_18950 | 242  | A | T | 14  | 4   | --        | --    |
|            | Ca(ICC2/PI489777)SNP_18951 | 270  | C | A | 14  | 4   | --        | --    |
|            | Ca(ICC2/PI489777)SNP_18952 | 383  | A | G | 21  | 10  | --        | --    |
| CakTC42738 | Ca(ICC2/PI489777)SNP_18953 | 617  | A | T | 24  | 4   | --        | --    |
|            | Ca(ICC2/PI489777)SNP_18954 | 1460 | G | T | 33  | 18  | --        | --    |
| CakTC40499 | Ca(ICC2/PI489777)SNP_18955 | 240  | T | C | 58  | 54  | --        | --    |
| CakTC27910 | Ca(ICC2/PI489777)SNP_18956 | 304  | C | T | 20  | 25  | --        | --    |
|            | Ca(ICC2/PI489777)SNP_18957 | 359  | C | T | 20  | 6   | --        | --    |
|            | Ca(ICC2/PI489777)SNP_18958 | 362  | T | C | 19  | 14  | --        | --    |
|            | Ca(ICC2/PI489777)SNP_18959 | 377  | T | C | 15  | 13  | --        | --    |
|            | Ca(ICC2/PI489777)SNP_18960 | 473  | A | T | 16  | 5   | --        | --    |
|            | Ca(ICC2/PI489777)SNP_18961 | 521  | G | A | 18  | 6   | --        | --    |
| CakTC26195 | Ca(ICC2/PI489777)SNP_18962 | 456  | C | G | 30  | 13  | --        | --    |
| CakTC28283 | Ca(ICC2/PI489777)SNP_18963 | 418  | T | G | 15  | 5   | --        | --    |
|            | Ca(ICC2/PI489777)SNP_18964 | 449  | T | G | 15  | 5   | --        | --    |
|            | Ca(ICC2/PI489777)SNP_18965 | 566  | A | G | 15  | 5   | --        | --    |
|            | Ca(ICC2/PI489777)SNP_18966 | 1154 | C | T | 6   | 8   | --        | --    |
|            | Ca(ICC2/PI489777)SNP_18967 | 2502 | C | T | 4   | 7   | --        | --    |
| CakTC05909 | Ca(ICC2/PI489777)SNP_18968 | 497  | T | G | 10  | 11  | --        | --    |
| CakTC37197 | Ca(ICC2/PI489777)SNP_18969 | 256  | C | T | 70  | 57  | Young_pod | --    |
|            | Ca(ICC2/PI489777)SNP_18970 | 413  | G | A | 56  | 60  | Young_pod | --    |
|            | Ca(ICC2/PI489777)SNP_18971 | 856  | A | C | 83  | 104 | Young_pod | --    |
| CakTC41268 | Ca(ICC2/PI489777)SNP_18972 | 321  | T | G | 45  | 9   | --        | --    |
| CakTC43215 | Ca(ICC2/PI489777)SNP_18973 | 141  | T | C | 14  | 36  | --        | --    |
|            | Ca(ICC2/PI489777)SNP_18974 | 727  | A | G | 32  | 61  | --        | --    |
|            | Ca(ICC2/PI489777)SNP_18975 | 826  | T | A | 19  | 44  | --        | --    |
|            | Ca(ICC2/PI489777)SNP_18976 | 829  | G | A | 17  | 45  | --        | --    |
| CakTC39132 | Ca(ICC2/PI489777)SNP_18977 | 230  | G | T | 10  | 8   | --        | --    |
|            | Ca(ICC2/PI489777)SNP_18978 | 873  | T | C | 11  | 7   | --        | --    |
| CakTC25074 | Ca(ICC2/PI489777)SNP_18979 | 806  | G | A | 104 | 60  | --        | --    |
| CakTC07637 | Ca(ICC2/PI489777)SNP_18980 | 305  | C | T | 3   | 9   | --        | --    |
|            | Ca(ICC2/PI489777)SNP_18981 | 593  | T | C | 5   | 3   | --        | --    |
| CakTC22365 | Ca(ICC2/PI489777)SNP_18982 | 543  | A | T | 4   | 5   | --        | --    |
|            | Ca(ICC2/PI489777)SNP_18983 | 544  | C | A | 4   | 5   | --        | --    |
|            | Ca(ICC2/PI489777)SNP_18984 | 1577 | T | A | 88  | 9   | --        | --    |
| CakTC31458 | Ca(ICC2/PI489777)SNP_18985 | 829  | T | C | 4   | 3   | --        | --    |
|            | Ca(ICC2/PI489777)SNP_18986 | 1070 | A | G | 12  | 4   | --        | --    |
| CakTC36582 | Ca(ICC2/PI489777)SNP_18987 | 1110 | C | T | 5   | 5   | --        | --    |
|            | Ca(ICC2/PI489777)SNP_18988 | 1204 | C | G | 4   | 4   | --        | --    |
|            | Ca(ICC2/PI489777)SNP_18989 | 1227 | T | C | 4   | 4   | --        | --    |
| CakTC13200 | Ca(ICC2/PI489777)SNP_18990 | 249  | T | A | 139 | 10  | --        | --    |
| CakTC41597 | Ca(ICC2/PI489777)SNP_18991 | 8    | C | A | 23  | 41  | --        | --    |
|            | Ca(ICC2/PI489777)SNP_18992 | 505  | C | T | 179 | 217 | --        | --    |
|            | Ca(ICC2/PI489777)SNP_18993 | 623  | C | G | 18  | 27  | --        | --    |
| CakTC43188 | Ca(ICC2/PI489777)SNP_18994 | 436  | T | A | 19  | 10  | --        | --    |
|            | Ca(ICC2/PI489777)SNP_18995 | 1597 | C | G | 22  | 17  | --        | --    |
|            | Ca(ICC2/PI489777)SNP_18996 | 1639 | G | A | 29  | 12  | --        | --    |
|            | Ca(ICC2/PI489777)SNP_18997 | 1641 | G | A | 29  | 12  | --        | --    |
| CakTC11692 | Ca(ICC2/PI489777)SNP_18998 | 285  | C | T | 4   | 3   | Shoot     | --    |
|            | Ca(ICC2/PI489777)SNP_18999 | 298  | T | C | 4   | 3   | Shoot     | --    |
|            | Ca(ICC2/PI489777)SNP_19000 | 305  | A | C | 5   | 3   | Shoot     | --    |
|            | Ca(ICC2/PI489777)SNP_19001 | 313  | G | A | 5   | 3   | Shoot     | --    |
|            | Ca(ICC2/PI489777)SNP_19002 | 325  | A | G | 5   | 3   | Shoot     | --    |
|            | Ca(ICC2/PI489777)SNP_19003 | 334  | T | A | 5   | 3   | Shoot     | --    |
|            | Ca(ICC2/PI489777)SNP_19004 | 343  | G | C | 5   | 3   | Shoot     | --    |
| CakTC29566 | Ca(ICC2/PI489777)SNP_19005 | 282  | C | T | 18  | 5   | --        | --    |
|            | Ca(ICC2/PI489777)SNP_19006 | 510  | G | A | 14  | 5   | --        | --    |
|            | Ca(ICC2/PI489777)SNP_19007 | 538  | A | G | 15  | 5   | --        | --    |
| CakTC22401 | Ca(ICC2/PI489777)SNP_19008 | 1212 | C | T | 5   | 8   | --        | --    |
| CakTC28869 | Ca(ICC2/PI489777)SNP_19009 | 493  | A | G | 68  | 45  | --        | --    |
| CakTC39019 | Ca(ICC2/PI489777)SNP_19010 | 940  | C | T | 17  | 6   | --        | zf-HD |
| CakTC41952 | Ca(ICC2/PI489777)SNP_19011 | 995  | C | G | 6   | 9   | --        | --    |
| CakTC42261 | Ca(ICC2/PI489777)SNP_19012 | 193  | C | T | 7   | 3   | --        | NAC   |
|            | Ca(ICC2/PI489777)SNP_19013 | 351  | A | G | 8   | 5   | --        | NAC   |

|            |                            |       |   |   |    |    |        |      |
|------------|----------------------------|-------|---|---|----|----|--------|------|
|            | Ca(ICC2/PI489777)SNP_19014 | 1558  | T | C | 4  | 7  | --     | NAC  |
| CakTC39020 | Ca(ICC2/PI489777)SNP_19015 | 717   | G | C | 9  | 9  | --     | --   |
| CakTC39482 | Ca(ICC2/PI489777)SNP_19016 | 983   | A | G | 69 | 39 | --     | --   |
| CakTC24497 | Ca(ICC2/PI489777)SNP_19017 | 555   | A | G | 6  | 9  | --     | --   |
| CakTC23319 | Ca(ICC2/PI489777)SNP_19018 | 511   | A | C | 32 | 4  | --     | --   |
|            | Ca(ICC2/PI489777)SNP_19019 | 2247  | C | T | 14 | 6  | --     | --   |
| CakTC38487 | Ca(ICC2/PI489777)SNP_19020 | 890   | C | T | 83 | 81 | --     | --   |
| CakTC41576 | Ca(ICC2/PI489777)SNP_19021 | 342   | C | T | 3  | 7  | --     | DDT  |
|            | Ca(ICC2/PI489777)SNP_19022 | 621   | C | T | 11 | 9  | --     | DDT  |
|            | Ca(ICC2/PI489777)SNP_19023 | 643   | G | A | 11 | 9  | --     | DDT  |
| CakTC37536 | Ca(ICC2/PI489777)SNP_19024 | 29    | C | T | 45 | 26 | --     | --   |
| CakTC39522 | Ca(ICC2/PI489777)SNP_19025 | 200   | T | C | 5  | 6  | --     | --   |
| CakTC40182 | Ca(ICC2/PI489777)SNP_19026 | 312   | C | A | 28 | 9  | --     | --   |
| CakTC37543 | Ca(ICC2/PI489777)SNP_19027 | 944   | T | C | 4  | 3  | --     | --   |
|            | Ca(ICC2/PI489777)SNP_19028 | 1025  | G | A | 6  | 3  | --     | --   |
| CakTC32490 | Ca(ICC2/PI489777)SNP_19029 | 2435  | T | C | 7  | 3  | --     | --   |
|            | Ca(ICC2/PI489777)SNP_19030 | 2515  | A | G | 4  | 3  | --     | --   |
| CakTC37790 | Ca(ICC2/PI489777)SNP_19031 | 891   | T | C | 46 | 50 | --     | --   |
| CakTC27767 | Ca(ICC2/PI489777)SNP_19032 | 688   | G | A | 4  | 3  | --     | --   |
|            | Ca(ICC2/PI489777)SNP_19033 | 698   | A | C | 5  | 3  | --     | --   |
| CakTC29498 | Ca(ICC2/PI489777)SNP_19034 | 233   | A | G | 19 | 3  | --     | NAC  |
| CakTC39417 | Ca(ICC2/PI489777)SNP_19035 | 1616  | C | T | 8  | 9  | --     | --   |
| CakTC27337 | Ca(ICC2/PI489777)SNP_19036 | 644   | A | G | 7  | 11 | --     | --   |
|            | Ca(ICC2/PI489777)SNP_19037 | 812   | A | G | 3  | 7  | --     | --   |
|            | Ca(ICC2/PI489777)SNP_19038 | 886   | G | A | 5  | 5  | --     | --   |
| CakTC27502 | Ca(ICC2/PI489777)SNP_19039 | 1133  | T | C | 4  | 6  | --     | --   |
|            | Ca(ICC2/PI489777)SNP_19040 | 1177  | T | G | 5  | 6  | --     | --   |
|            | Ca(ICC2/PI489777)SNP_19041 | 1901  | T | C | 3  | 4  | --     | --   |
| CakTC22384 | Ca(ICC2/PI489777)SNP_19042 | 625   | C | T | 11 | 7  | --     | --   |
| CakTC27642 | Ca(ICC2/PI489777)SNP_19043 | 290   | C | T | 5  | 6  | --     | --   |
| CakTC37860 | Ca(ICC2/PI489777)SNP_19044 | 397   | C | T | 6  | 15 | --     | --   |
|            | Ca(ICC2/PI489777)SNP_19045 | 476   | A | G | 7  | 21 | --     | --   |
|            | Ca(ICC2/PI489777)SNP_19046 | 493   | A | G | 5  | 20 | --     | --   |
|            | Ca(ICC2/PI489777)SNP_19047 | 858   | T | C | 15 | 13 | --     | --   |
|            | Ca(ICC2/PI489777)SNP_19048 | 971   | T | A | 6  | 6  | --     | --   |
|            | Ca(ICC2/PI489777)SNP_19049 | 974   | C | A | 6  | 5  | --     | --   |
| CakTC09853 | Ca(ICC2/PI489777)SNP_19050 | 619   | C | T | 28 | 27 | --     | --   |
|            | Ca(ICC2/PI489777)SNP_19051 | 838   | T | C | 12 | 8  | --     | --   |
| CakTC06802 | Ca(ICC2/PI489777)SNP_19052 | 264   | C | T | 4  | 3  | --     | --   |
|            | Ca(ICC2/PI489777)SNP_19053 | 270   | C | T | 5  | 3  | --     | --   |
| CakTC31202 | Ca(ICC2/PI489777)SNP_19054 | 331   | T | C | 3  | 7  | --     | --   |
|            | Ca(ICC2/PI489777)SNP_19055 | 488   | C | G | 5  | 3  | --     | --   |
|            | Ca(ICC2/PI489777)SNP_19056 | 643   | G | T | 8  | 3  | --     | --   |
|            | Ca(ICC2/PI489777)SNP_19057 | 785   | A | C | 7  | 5  | --     | --   |
|            | Ca(ICC2/PI489777)SNP_19058 | 1189  | G | A | 5  | 3  | --     | --   |
|            | Ca(ICC2/PI489777)SNP_19059 | 1273  | G | A | 4  | 4  | --     | --   |
|            | Ca(ICC2/PI489777)SNP_19060 | 1288  | A | G | 3  | 4  | --     | --   |
| CakTC32460 | Ca(ICC2/PI489777)SNP_19061 | 4818  | A | G | 13 | 6  | Mature | Leaf |
|            | Ca(ICC2/PI489777)SNP_19062 | 5043  | T | C | 9  | 3  | Mature | Leaf |
| CakTC40966 | Ca(ICC2/PI489777)SNP_19063 | 348   | T | C | 15 | 30 | --     | --   |
|            | Ca(ICC2/PI489777)SNP_19064 | 761   | A | G | 24 | 19 | --     | --   |
| CakTC42586 | Ca(ICC2/PI489777)SNP_19065 | 775   | A | T | 59 | 18 | --     | --   |
|            | Ca(ICC2/PI489777)SNP_19066 | 1642  | G | T | 18 | 14 | --     | --   |
| CakTC09535 | Ca(ICC2/PI489777)SNP_19067 | 6970  | C | T | 4  | 5  | --     | --   |
|            | Ca(ICC2/PI489777)SNP_19068 | 7026  | T | C | 5  | 3  | --     | --   |
|            | Ca(ICC2/PI489777)SNP_19069 | 7281  | G | A | 6  | 5  | --     | --   |
|            | Ca(ICC2/PI489777)SNP_19070 | 11031 | A | G | 4  | 4  | --     | --   |
|            | Ca(ICC2/PI489777)SNP_19071 | 12434 | A | G | 5  | 8  | --     | --   |
|            | Ca(ICC2/PI489777)SNP_19072 | 12448 | T | A | 5  | 9  | --     | --   |
| CakTC04638 | Ca(ICC2/PI489777)SNP_19073 | 50    | C | T | 9  | 10 | --     | --   |
| CakTC39228 | Ca(ICC2/PI489777)SNP_19074 | 265   | T | C | 13 | 12 | --     | --   |
|            | Ca(ICC2/PI489777)SNP_19075 | 315   | T | C | 13 | 12 | --     | --   |
|            | Ca(ICC2/PI489777)SNP_19076 | 510   | C | T | 11 | 10 | --     | --   |
|            | Ca(ICC2/PI489777)SNP_19077 | 771   | A | G | 7  | 4  | --     | --   |
|            | Ca(ICC2/PI489777)SNP_19078 | 1259  | G | C | 5  | 12 | --     | --   |
| CakTC10454 | Ca(ICC2/PI489777)SNP_19079 | 818   | G | A | 22 | 8  | --     | --   |
|            | Ca(ICC2/PI489777)SNP_19080 | 1409  | A | G | 8  | 3  | --     | --   |
|            | Ca(ICC2/PI489777)SNP_19081 | 1454  | C | T | 11 | 3  | --     | --   |
|            | Ca(ICC2/PI489777)SNP_19082 | 1527  | C | A | 7  | 5  | --     | --   |
|            | Ca(ICC2/PI489777)SNP_19083 | 1636  | T | A | 6  | 3  | --     | --   |
|            | Ca(ICC2/PI489777)SNP_19084 | 1641  | C | T | 6  | 4  | --     | --   |
|            | Ca(ICC2/PI489777)SNP_19085 | 1742  | T | C | 8  | 4  | --     | --   |
|            | Ca(ICC2/PI489777)SNP_19086 | 2176  | T | C | 8  | 5  | --     | --   |
|            | Ca(ICC2/PI489777)SNP_19087 | 3059  | C | T | 6  | 11 | --     | --   |

|            |                            |      |   |   |     |    |       |             |
|------------|----------------------------|------|---|---|-----|----|-------|-------------|
|            | Ca(ICC2/PI489777)SNP_19088 | 3388 | A | G | 5   | 10 | --    | --          |
| CakTC31298 | Ca(ICC2/PI489777)SNP_19089 | 511  | T | C | 8   | 3  | --    | --          |
| CakTC29661 | Ca(ICC2/PI489777)SNP_19090 | 205  | A | T | 126 | 72 | --    | --          |
|            | Ca(ICC2/PI489777)SNP_19091 | 240  | G | C | 127 | 57 | --    | --          |
| CakTC08510 | Ca(ICC2/PI489777)SNP_19092 | 400  | A | G | 5   | 3  | --    | HB          |
|            | Ca(ICC2/PI489777)SNP_19093 | 658  | A | G | 5   | 6  | --    | HB          |
|            | Ca(ICC2/PI489777)SNP_19094 | 663  | G | T | 5   | 6  | --    | HB          |
|            | Ca(ICC2/PI489777)SNP_19095 | 717  | C | G | 5   | 5  | --    | HB          |
|            | Ca(ICC2/PI489777)SNP_19096 | 2454 | G | T | 4   | 5  | --    | HB          |
|            | Ca(ICC2/PI489777)SNP_19097 | 2965 | A | G | 8   | 3  | --    | HB          |
|            | Ca(ICC2/PI489777)SNP_19098 | 3142 | A | G | 5   | 6  | --    | HB          |
|            | Ca(ICC2/PI489777)SNP_19099 | 4048 | A | G | 8   | 7  | --    | HB          |
|            | Ca(ICC2/PI489777)SNP_19100 | 5168 | G | A | 7   | 6  | --    | HB          |
|            | Ca(ICC2/PI489777)SNP_19101 | 5394 | C | G | 4   | 9  | --    | HB          |
|            | Ca(ICC2/PI489777)SNP_19102 | 5396 | G | A | 4   | 9  | --    | HB          |
|            | Ca(ICC2/PI489777)SNP_19103 | 5503 | A | G | 3   | 7  | --    | HB          |
| CakTC28637 | Ca(ICC2/PI489777)SNP_19104 | 984  | C | T | 4   | 9  | --    | --          |
|            | Ca(ICC2/PI489777)SNP_19105 | 1203 | C | T | 4   | 9  | --    | --          |
| CakTC39736 | Ca(ICC2/PI489777)SNP_19106 | 371  | A | G | 57  | 23 | --    | --          |
|            | Ca(ICC2/PI489777)SNP_19107 | 977  | G | A | 28  | 25 | --    | --          |
|            | Ca(ICC2/PI489777)SNP_19108 | 1385 | C | T | 34  | 17 | --    | --          |
| CakTC32876 | Ca(ICC2/PI489777)SNP_19109 | 75   | G | A | 4   | 3  | --    | --          |
|            | Ca(ICC2/PI489777)SNP_19110 | 425  | G | A | 3   | 6  | --    | --          |
| CakTC29639 | Ca(ICC2/PI489777)SNP_19111 | 606  | G | A | 9   | 7  | --    | --          |
| CakTC30900 | Ca(ICC2/PI489777)SNP_19112 | 229  | T | C | 13  | 5  | --    | --          |
|            | Ca(ICC2/PI489777)SNP_19113 | 310  | T | G | 16  | 6  | --    | --          |
|            | Ca(ICC2/PI489777)SNP_19114 | 616  | C | T | 17  | 3  | --    | --          |
|            | Ca(ICC2/PI489777)SNP_19115 | 727  | C | A | 20  | 5  | --    | --          |
|            | Ca(ICC2/PI489777)SNP_19116 | 732  | C | A | 17  | 5  | --    | --          |
|            | Ca(ICC2/PI489777)SNP_19117 | 781  | G | A | 18  | 4  | --    | --          |
|            | Ca(ICC2/PI489777)SNP_19118 | 877  | G | A | 15  | 5  | --    | --          |
|            | Ca(ICC2/PI489777)SNP_19119 | 1297 | G | A | 10  | 5  | --    | --          |
|            | Ca(ICC2/PI489777)SNP_19120 | 1541 | G | T | 8   | 5  | --    | --          |
|            | Ca(ICC2/PI489777)SNP_19121 | 1780 | G | A | 3   | 6  | --    | --          |
|            | Ca(ICC2/PI489777)SNP_19122 | 1861 | T | G | 3   | 9  | --    | --          |
|            | Ca(ICC2/PI489777)SNP_19123 | 3613 | G | A | 6   | 3  | --    | --          |
|            | Ca(ICC2/PI489777)SNP_19124 | 3681 | C | G | 7   | 3  | --    | --          |
| CakTC38666 | Ca(ICC2/PI489777)SNP_19125 | 242  | A | C | 10  | 6  | --    | --          |
|            | Ca(ICC2/PI489777)SNP_19126 | 463  | T | A | 10  | 8  | --    | --          |
|            | Ca(ICC2/PI489777)SNP_19127 | 833  | C | T | 9   | 5  | --    | --          |
|            | Ca(ICC2/PI489777)SNP_19128 | 851  | G | T | 9   | 5  | --    | --          |
|            | Ca(ICC2/PI489777)SNP_19129 | 876  | A | G | 8   | 5  | --    | --          |
|            | Ca(ICC2/PI489777)SNP_19130 | 890  | T | A | 8   | 5  | --    | --          |
| CakTC39260 | Ca(ICC2/PI489777)SNP_19131 | 83   | T | C | 5   | 3  | --    | MYB-related |
|            | Ca(ICC2/PI489777)SNP_19132 | 501  | G | A | 7   | 3  | --    | MYB-related |
|            | Ca(ICC2/PI489777)SNP_19133 | 1010 | T | A | 7   | 7  | --    | MYB-related |
|            | Ca(ICC2/PI489777)SNP_19134 | 1038 | T | C | 7   | 7  | --    | MYB-related |
|            | Ca(ICC2/PI489777)SNP_19135 | 1053 | A | G | 7   | 7  | --    | MYB-related |
|            | Ca(ICC2/PI489777)SNP_19136 | 1179 | A | G | 5   | 7  | --    | MYB-related |
| CakTC41302 | Ca(ICC2/PI489777)SNP_19137 | 2327 | A | C | 15  | 7  | --    | --          |
|            | Ca(ICC2/PI489777)SNP_19138 | 2501 | A | G | 11  | 6  | --    | --          |
| CakTC28893 | Ca(ICC2/PI489777)SNP_19139 | 273  | C | T | 3   | 4  | --    | MADS        |
| CakTC31288 | Ca(ICC2/PI489777)SNP_19140 | 87   | T | C | 4   | 3  | --    | --          |
|            | Ca(ICC2/PI489777)SNP_19141 | 1645 | A | C | 11  | 9  | --    | --          |
|            | Ca(ICC2/PI489777)SNP_19142 | 1649 | A | C | 11  | 9  | --    | --          |
| CakTC25155 | Ca(ICC2/PI489777)SNP_19143 | 304  | C | T | 16  | 12 | --    | --          |
| CakTC30953 | Ca(ICC2/PI489777)SNP_19144 | 227  | G | A | 3   | 3  | --    | C2C2-Dof    |
|            | Ca(ICC2/PI489777)SNP_19145 | 318  | G | A | 3   | 3  | --    | C2C2-Dof    |
|            | Ca(ICC2/PI489777)SNP_19146 | 327  | G | A | 3   | 3  | --    | C2C2-Dof    |
|            | Ca(ICC2/PI489777)SNP_19147 | 335  | C | T | 3   | 4  | --    | C2C2-Dof    |
|            | Ca(ICC2/PI489777)SNP_19148 | 376  | G | A | 5   | 3  | --    | C2C2-Dof    |
| CakTC43328 | Ca(ICC2/PI489777)SNP_19149 | 375  | G | C | 7   | 6  | Shoot | MYB         |
|            | Ca(ICC2/PI489777)SNP_19150 | 420  | A | C | 7   | 5  | Shoot | MYB         |
|            | Ca(ICC2/PI489777)SNP_19151 | 944  | T | G | 8   | 22 | Shoot | MYB         |
| CakTC28297 | Ca(ICC2/PI489777)SNP_19152 | 1871 | G | T | 22  | 8  | --    | MYB         |
|            | Ca(ICC2/PI489777)SNP_19153 | 3668 | C | T | 22  | 11 | --    | MYB         |
| CakTC40113 | Ca(ICC2/PI489777)SNP_19154 | 287  | C | A | 20  | 10 | --    | --          |
|            | Ca(ICC2/PI489777)SNP_19155 | 1252 | T | G | 6   | 14 | --    | --          |
| CakTC37403 | Ca(ICC2/PI489777)SNP_19156 | 198  | T | C | 38  | 18 | --    | --          |
|            | Ca(ICC2/PI489777)SNP_19157 | 251  | G | C | 36  | 22 | --    | --          |
|            | Ca(ICC2/PI489777)SNP_19158 | 293  | G | A | 40  | 24 | --    | --          |
| CakTC11454 | Ca(ICC2/PI489777)SNP_19159 | 261  | C | A | 10  | 5  | --    | --          |
|            | Ca(ICC2/PI489777)SNP_19160 | 467  | A | G | 8   | 5  | --    | --          |
|            | Ca(ICC2/PI489777)SNP_19161 | 750  | C | G | 3   | 3  | --    | --          |

|            |                            |      |   |   |     |     |           |     |
|------------|----------------------------|------|---|---|-----|-----|-----------|-----|
| CakTC41949 | Ca(ICC2/PI489777)SNP_19162 | 661  | T | C | 12  | 22  | --        | --  |
| CakTC33063 | Ca(ICC2/PI489777)SNP_19163 | 139  | A | G | 6   | 3   | Shoot     | --  |
|            | Ca(ICC2/PI489777)SNP_19164 | 276  | C | T | 7   | 5   | Shoot     | --  |
| CakTC34184 | Ca(ICC2/PI489777)SNP_19165 | 439  | G | A | 10  | 7   | --        | --  |
|            | Ca(ICC2/PI489777)SNP_19166 | 643  | C | T | 4   | 5   | --        | --  |
|            | Ca(ICC2/PI489777)SNP_19167 | 649  | T | C | 4   | 5   | --        | --  |
| CakTC26429 | Ca(ICC2/PI489777)SNP_19168 | 151  | A | G | 5   | 6   | --        | --  |
|            | Ca(ICC2/PI489777)SNP_19169 | 152  | T | A | 5   | 6   | --        | --  |
|            | Ca(ICC2/PI489777)SNP_19170 | 636  | A | T | 18  | 8   | --        | --  |
|            | Ca(ICC2/PI489777)SNP_19171 | 684  | G | A | 13  | 9   | --        | --  |
|            | Ca(ICC2/PI489777)SNP_19172 | 846  | G | A | 17  | 7   | --        | --  |
|            | Ca(ICC2/PI489777)SNP_19173 | 897  | T | A | 21  | 4   | --        | --  |
|            | Ca(ICC2/PI489777)SNP_19174 | 927  | G | T | 21  | 6   | --        | --  |
|            | Ca(ICC2/PI489777)SNP_19175 | 953  | A | G | 17  | 6   | --        | --  |
|            | Ca(ICC2/PI489777)SNP_19176 | 1149 | T | G | 17  | 9   | --        | --  |
|            | Ca(ICC2/PI489777)SNP_19177 | 1152 | G | A | 18  | 9   | --        | --  |
|            | Ca(ICC2/PI489777)SNP_19178 | 1401 | G | A | 23  | 5   | --        | --  |
| CakTC30207 | Ca(ICC2/PI489777)SNP_19179 | 656  | A | G | 9   | 3   | --        | --  |
|            | Ca(ICC2/PI489777)SNP_19180 | 1209 | G | A | 10  | 3   | --        | --  |
| CakTC38531 | Ca(ICC2/PI489777)SNP_19181 | 106  | G | C | 8   | 6   | --        | --  |
|            | Ca(ICC2/PI489777)SNP_19182 | 136  | T | C | 8   | 5   | --        | --  |
|            | Ca(ICC2/PI489777)SNP_19183 | 141  | A | T | 8   | 5   | --        | --  |
|            | Ca(ICC2/PI489777)SNP_19184 | 192  | T | C | 9   | 5   | --        | --  |
|            | Ca(ICC2/PI489777)SNP_19185 | 914  | T | C | 7   | 3   | --        | --  |
| CakTC35109 | Ca(ICC2/PI489777)SNP_19186 | 349  | C | T | 3   | 11  | --        | --  |
|            | Ca(ICC2/PI489777)SNP_19187 | 2392 | A | G | 6   | 14  | --        | --  |
| CakTC30598 | Ca(ICC2/PI489777)SNP_19188 | 1179 | A | G | 5   | 3   | --        | --  |
|            | Ca(ICC2/PI489777)SNP_19189 | 1242 | C | A | 5   | 4   | --        | --  |
| CakTC37572 | Ca(ICC2/PI489777)SNP_19190 | 256  | C | A | 3   | 3   | --        | --  |
|            | Ca(ICC2/PI489777)SNP_19191 | 351  | C | T | 4   | 5   | --        | --  |
| CakTC30396 | Ca(ICC2/PI489777)SNP_19192 | 2173 | C | T | 3   | 3   | --        | --  |
|            | Ca(ICC2/PI489777)SNP_19193 | 2215 | T | C | 3   | 3   | --        | --  |
| CakTC09015 | Ca(ICC2/PI489777)SNP_19194 | 196  | G | A | 8   | 4   | --        | --  |
| CakTC17326 | Ca(ICC2/PI489777)SNP_19195 | 516  | C | T | 472 | 255 | --        | --  |
|            | Ca(ICC2/PI489777)SNP_19196 | 1203 | C | T | 118 | 25  | --        | --  |
| CakTC25021 | Ca(ICC2/PI489777)SNP_19197 | 1234 | C | G | 4   | 3   | Young_pod | --  |
| CakTC14877 | Ca(ICC2/PI489777)SNP_19198 | 246  | T | C | 4   | 4   | --        | --  |
|            | Ca(ICC2/PI489777)SNP_19199 | 421  | A | T | 3   | 4   | --        | --  |
|            | Ca(ICC2/PI489777)SNP_19200 | 473  | G | A | 3   | 4   | --        | --  |
| CakTC11367 | Ca(ICC2/PI489777)SNP_19201 | 355  | G | A | 9   | 12  | --        | --  |
|            | Ca(ICC2/PI489777)SNP_19202 | 556  | T | C | 9   | 10  | --        | --  |
|            | Ca(ICC2/PI489777)SNP_19203 | 823  | G | C | 21  | 9   | --        | --  |
|            | Ca(ICC2/PI489777)SNP_19204 | 937  | C | T | 17  | 5   | --        | --  |
|            | Ca(ICC2/PI489777)SNP_19205 | 1015 | A | G | 7   | 4   | --        | --  |
| CakTC37167 | Ca(ICC2/PI489777)SNP_19206 | 235  | A | C | 12  | 3   | --        | --  |
|            | Ca(ICC2/PI489777)SNP_19207 | 268  | A | G | 12  | 3   | --        | --  |
|            | Ca(ICC2/PI489777)SNP_19208 | 742  | T | A | 7   | 4   | --        | --  |
| CakTC38762 | Ca(ICC2/PI489777)SNP_19209 | 1142 | C | G | 11  | 19  | --        | --  |
| CakTC27437 | Ca(ICC2/PI489777)SNP_19210 | 436  | A | G | 7   | 4   | Root      | --  |
| CakTC42789 | Ca(ICC2/PI489777)SNP_19211 | 791  | T | C | 8   | 4   | Root      | --  |
|            | Ca(ICC2/PI489777)SNP_19212 | 811  | C | T | 8   | 4   | Root      | --  |
|            | Ca(ICC2/PI489777)SNP_19213 | 814  | A | T | 7   | 4   | Root      | --  |
|            | Ca(ICC2/PI489777)SNP_19214 | 857  | A | G | 5   | 4   | Root      | --  |
| CakTC29237 | Ca(ICC2/PI489777)SNP_19215 | 157  | C | T | 34  | 6   | --        | --  |
|            | Ca(ICC2/PI489777)SNP_19216 | 839  | G | A | 91  | 10  | --        | --  |
| CakTC26624 | Ca(ICC2/PI489777)SNP_19217 | 1113 | A | G | 8   | 3   | --        | C3H |
|            | Ca(ICC2/PI489777)SNP_19218 | 1356 | A | C | 5   | 4   | --        | C3H |
|            | Ca(ICC2/PI489777)SNP_19219 | 1441 | A | G | 5   | 4   | --        | C3H |
| CakTC30359 | Ca(ICC2/PI489777)SNP_19220 | 1521 | G | C | 3   | 3   | --        | TCP |
| CakTC39740 | Ca(ICC2/PI489777)SNP_19221 | 228  | C | T | 16  | 16  | --        | --  |
|            | Ca(ICC2/PI489777)SNP_19222 | 364  | A | T | 33  | 22  | --        | --  |
|            | Ca(ICC2/PI489777)SNP_19223 | 744  | G | T | 30  | 16  | --        | --  |
|            | Ca(ICC2/PI489777)SNP_19224 | 856  | C | T | 42  | 22  | --        | --  |
|            | Ca(ICC2/PI489777)SNP_19225 | 980  | G | A | 48  | 31  | --        | --  |
|            | Ca(ICC2/PI489777)SNP_19226 | 989  | G | C | 41  | 30  | --        | --  |
|            | Ca(ICC2/PI489777)SNP_19227 | 1635 | C | T | 9   | 3   | --        | --  |
|            | Ca(ICC2/PI489777)SNP_19228 | 1647 | T | C | 9   | 3   | --        | --  |
|            | Ca(ICC2/PI489777)SNP_19229 | 1828 | A | G | 7   | 5   | --        | --  |
|            | Ca(ICC2/PI489777)SNP_19230 | 1947 | G | A | 9   | 3   | --        | --  |
| CakTC38377 | Ca(ICC2/PI489777)SNP_19231 | 350  | T | C | 4   | 9   | Flower    | bud |
|            | Ca(ICC2/PI489777)SNP_19232 | 725  | A | G | 3   | 5   | Flower    | bud |
|            | Ca(ICC2/PI489777)SNP_19233 | 752  | T | C | 4   | 5   | Flower    | bud |
|            | Ca(ICC2/PI489777)SNP_19234 | 860  | A | T | 5   | 5   | Flower    | bud |
|            | Ca(ICC2/PI489777)SNP_19235 | 872  | A | G | 4   | 5   | Flower    | bud |

|            |                            |      |   |   |     |    |       |    |
|------------|----------------------------|------|---|---|-----|----|-------|----|
| CakTC40127 | Ca(ICC2/PI489777)SNP_19236 | 167  | C | T | 18  | 6  | --    | -- |
|            | Ca(ICC2/PI489777)SNP_19237 | 169  | C | G | 18  | 6  | --    | -- |
|            | Ca(ICC2/PI489777)SNP_19238 | 295  | T | C | 22  | 7  | --    | -- |
|            | Ca(ICC2/PI489777)SNP_19239 | 590  | A | G | 13  | 7  | --    | -- |
|            | Ca(ICC2/PI489777)SNP_19240 | 865  | G | A | 16  | 6  | --    | -- |
|            | Ca(ICC2/PI489777)SNP_19241 | 1166 | T | C | 18  | 8  | --    | -- |
| CakTC35231 | Ca(ICC2/PI489777)SNP_19242 | 1022 | G | A | 7   | 4  | --    | -- |
|            | Ca(ICC2/PI489777)SNP_19243 | 1522 | G | A | 6   | 4  | --    | -- |
|            | Ca(ICC2/PI489777)SNP_19244 | 1610 | G | T | 5   | 7  | --    | -- |
|            | Ca(ICC2/PI489777)SNP_19245 | 1807 | G | A | 4   | 5  | --    | -- |
|            | Ca(ICC2/PI489777)SNP_19246 | 2089 | T | C | 4   | 10 | --    | -- |
|            | Ca(ICC2/PI489777)SNP_19247 | 4864 | T | G | 3   | 3  | --    | -- |
| CakTC40057 | Ca(ICC2/PI489777)SNP_19248 | 288  | A | G | 3   | 5  | --    | -- |
| CakTC30781 | Ca(ICC2/PI489777)SNP_19249 | 426  | C | T | 7   | 9  | --    | -- |
|            | Ca(ICC2/PI489777)SNP_19250 | 465  | T | C | 8   | 8  | --    | -- |
|            | Ca(ICC2/PI489777)SNP_19251 | 1032 | C | G | 5   | 7  | --    | -- |
|            | Ca(ICC2/PI489777)SNP_19252 | 1149 | G | A | 4   | 8  | --    | -- |
|            | Ca(ICC2/PI489777)SNP_19253 | 1192 | C | T | 3   | 8  | --    | -- |
| CakTC25269 | Ca(ICC2/PI489777)SNP_19254 | 673  | C | G | 14  | 3  | Root  | -- |
|            | Ca(ICC2/PI489777)SNP_19255 | 1605 | G | A | 3   | 3  | Root  | -- |
|            | Ca(ICC2/PI489777)SNP_19256 | 1617 | T | C | 3   | 3  | Root  | -- |
|            | Ca(ICC2/PI489777)SNP_19257 | 1619 | G | A | 3   | 3  | Root  | -- |
|            | Ca(ICC2/PI489777)SNP_19258 | 1628 | T | C | 3   | 3  | Root  | -- |
| CakTC42464 | Ca(ICC2/PI489777)SNP_19259 | 47   | C | T | 18  | 13 | --    | -- |
|            | Ca(ICC2/PI489777)SNP_19260 | 334  | G | A | 26  | 27 | --    | -- |
|            | Ca(ICC2/PI489777)SNP_19261 | 939  | A | G | 22  | 16 | --    | -- |
|            | Ca(ICC2/PI489777)SNP_19262 | 1573 | T | C | 20  | 17 | --    | -- |
|            | Ca(ICC2/PI489777)SNP_19263 | 1659 | C | G | 14  | 10 | --    | -- |
| CakTC27388 | Ca(ICC2/PI489777)SNP_19264 | 77   | T | C | 18  | 14 | --    | -- |
| CakTC26492 | Ca(ICC2/PI489777)SNP_19265 | 2796 | T | A | 11  | 14 | --    | -- |
| CakTC26396 | Ca(ICC2/PI489777)SNP_19266 | 221  | C | T | 12  | 6  | --    | -- |
| CakTC23570 | Ca(ICC2/PI489777)SNP_19267 | 151  | G | A | 108 | 9  | Shoot | -- |
|            | Ca(ICC2/PI489777)SNP_19268 | 421  | C | A | 132 | 9  | Shoot | -- |
|            | Ca(ICC2/PI489777)SNP_19269 | 644  | C | A | 178 | 9  | Shoot | -- |
|            | Ca(ICC2/PI489777)SNP_19270 | 1624 | G | T | 81  | 10 | Shoot | -- |
|            | Ca(ICC2/PI489777)SNP_19271 | 1970 | C | A | 10  | 4  | Shoot | -- |
|            | Ca(ICC2/PI489777)SNP_19272 | 2195 | T | C | 12  | 7  | Shoot | -- |
| CakTC30591 | Ca(ICC2/PI489777)SNP_19273 | 995  | T | A | 4   | 8  | --    | -- |
|            | Ca(ICC2/PI489777)SNP_19274 | 1010 | G | C | 4   | 9  | --    | -- |
|            | Ca(ICC2/PI489777)SNP_19275 | 1049 | C | A | 4   | 9  | --    | -- |
|            | Ca(ICC2/PI489777)SNP_19276 | 1253 | G | A | 4   | 5  | --    | -- |
|            | Ca(ICC2/PI489777)SNP_19277 | 1621 | T | C | 4   | 3  | --    | -- |
| CakTC24233 | Ca(ICC2/PI489777)SNP_19278 | 287  | T | C | 4   | 6  | --    | -- |
|            | Ca(ICC2/PI489777)SNP_19279 | 324  | G | A | 4   | 5  | --    | -- |
|            | Ca(ICC2/PI489777)SNP_19280 | 588  | C | G | 11  | 4  | --    | -- |
| CakTC36562 | Ca(ICC2/PI489777)SNP_19281 | 226  | A | T | 7   | 4  | --    | -- |
| CakTC42318 | Ca(ICC2/PI489777)SNP_19282 | 219  | C | T | 4   | 3  | --    | -- |
| CakTC25046 | Ca(ICC2/PI489777)SNP_19283 | 218  | G | A | 55  | 21 | --    | -- |
|            | Ca(ICC2/PI489777)SNP_19284 | 1119 | C | A | 63  | 20 | --    | -- |
| CakTC06310 | Ca(ICC2/PI489777)SNP_19285 | 602  | A | T | 11  | 6  | --    | -- |
|            | Ca(ICC2/PI489777)SNP_19286 | 753  | C | T | 9   | 3  | --    | -- |
|            | Ca(ICC2/PI489777)SNP_19287 | 792  | T | G | 9   | 6  | --    | -- |
|            | Ca(ICC2/PI489777)SNP_19288 | 861  | G | A | 11  | 3  | --    | -- |
|            | Ca(ICC2/PI489777)SNP_19289 | 951  | A | G | 12  | 11 | --    | -- |
|            | Ca(ICC2/PI489777)SNP_19290 | 984  | A | T | 11  | 10 | --    | -- |
|            | Ca(ICC2/PI489777)SNP_19291 | 1120 | G | A | 10  | 8  | --    | -- |
|            | Ca(ICC2/PI489777)SNP_19292 | 1158 | A | G | 10  | 8  | --    | -- |
|            | Ca(ICC2/PI489777)SNP_19293 | 1227 | T | A | 8   | 7  | --    | -- |
|            | Ca(ICC2/PI489777)SNP_19294 | 1268 | C | G | 8   | 6  | --    | -- |
| CakTC10403 | Ca(ICC2/PI489777)SNP_19295 | 513  | A | C | 9   | 4  | --    | -- |
|            | Ca(ICC2/PI489777)SNP_19296 | 2221 | T | C | 3   | 3  | --    | -- |
|            | Ca(ICC2/PI489777)SNP_19297 | 2587 | G | A | 4   | 5  | --    | -- |
| CakTC42679 | Ca(ICC2/PI489777)SNP_19298 | 806  | C | T | 10  | 19 | --    | -- |
|            | Ca(ICC2/PI489777)SNP_19299 | 808  | A | G | 10  | 17 | --    | -- |
|            | Ca(ICC2/PI489777)SNP_19300 | 932  | T | C | 10  | 20 | --    | -- |
|            | Ca(ICC2/PI489777)SNP_19301 | 938  | T | C | 11  | 17 | --    | -- |
|            | Ca(ICC2/PI489777)SNP_19302 | 944  | A | G | 10  | 20 | --    | -- |
|            | Ca(ICC2/PI489777)SNP_19303 | 1007 | T | C | 12  | 28 | --    | -- |
|            | Ca(ICC2/PI489777)SNP_19304 | 1114 | C | T | 14  | 28 | --    | -- |
|            | Ca(ICC2/PI489777)SNP_19305 | 1292 | C | T | 24  | 46 | --    | -- |
|            | Ca(ICC2/PI489777)SNP_19306 | 1313 | C | G | 25  | 48 | --    | -- |
|            | Ca(ICC2/PI489777)SNP_19307 | 1801 | G | A | 9   | 6  | --    | -- |
|            | Ca(ICC2/PI489777)SNP_19308 | 1808 | C | T | 8   | 5  | --    | -- |
| CakTC39776 | Ca(ICC2/PI489777)SNP_19309 | 1226 | A | G | 38  | 14 | --    | -- |

|            |                            |      |   |   |    |    |        |      |
|------------|----------------------------|------|---|---|----|----|--------|------|
|            | Ca(ICC2/PI489777)SNP_19310 | 1358 | G | A | 41 | 17 | --     | --   |
|            | Ca(ICC2/PI489777)SNP_19311 | 1391 | A | G | 40 | 15 | --     | --   |
|            | Ca(ICC2/PI489777)SNP_19312 | 1461 | G | T | 29 | 14 | --     | --   |
|            | Ca(ICC2/PI489777)SNP_19313 | 1579 | A | G | 9  | 3  | --     | --   |
| CakTC39715 | Ca(ICC2/PI489777)SNP_19314 | 535  | A | G | 12 | 6  | --     | --   |
|            | Ca(ICC2/PI489777)SNP_19315 | 1483 | C | T | 17 | 13 | --     | --   |
|            | Ca(ICC2/PI489777)SNP_19316 | 1516 | G | A | 14 | 10 | --     | --   |
| CakTC23576 | Ca(ICC2/PI489777)SNP_19317 | 712  | T | C | 9  | 11 | --     | --   |
|            | Ca(ICC2/PI489777)SNP_19318 | 865  | T | C | 8  | 11 | --     | --   |
|            | Ca(ICC2/PI489777)SNP_19319 | 1136 | C | A | 20 | 6  | --     | --   |
| CakTC30140 | Ca(ICC2/PI489777)SNP_19320 | 390  | A | C | 8  | 3  | --     | --   |
|            | Ca(ICC2/PI489777)SNP_19321 | 399  | T | G | 8  | 3  | --     | --   |
| CakTC03069 | Ca(ICC2/PI489777)SNP_19322 | 423  | C | T | 5  | 5  | --     | --   |
|            | Ca(ICC2/PI489777)SNP_19323 | 570  | A | G | 5  | 4  | --     | --   |
| CakTC23812 | Ca(ICC2/PI489777)SNP_19324 | 126  | T | C | 26 | 15 | --     | --   |
|            | Ca(ICC2/PI489777)SNP_19325 | 1148 | G | A | 42 | 30 | --     | --   |
|            | Ca(ICC2/PI489777)SNP_19326 | 1363 | C | T | 32 | 29 | --     | --   |
|            | Ca(ICC2/PI489777)SNP_19327 | 1421 | T | C | 31 | 29 | --     | --   |
|            | Ca(ICC2/PI489777)SNP_19328 | 1430 | C | G | 32 | 26 | --     | --   |
|            | Ca(ICC2/PI489777)SNP_19329 | 1463 | C | T | 26 | 24 | --     | --   |
|            | Ca(ICC2/PI489777)SNP_19330 | 1658 | T | C | 6  | 4  | --     | --   |
|            | Ca(ICC2/PI489777)SNP_19331 | 1682 | A | G | 5  | 4  | --     | --   |
|            | Ca(ICC2/PI489777)SNP_19332 | 1703 | A | G | 3  | 4  | --     | --   |
|            | Ca(ICC2/PI489777)SNP_19333 | 1719 | T | G | 5  | 4  | --     | --   |
| CakTC37933 | Ca(ICC2/PI489777)SNP_19334 | 1106 | C | T | 5  | 4  | --     | --   |
|            | Ca(ICC2/PI489777)SNP_19335 | 1293 | G | A | 7  | 5  | --     | --   |
| CakTC41825 | Ca(ICC2/PI489777)SNP_19336 | 115  | G | A | 16 | 11 | --     | --   |
|            | Ca(ICC2/PI489777)SNP_19337 | 444  | C | T | 18 | 12 | --     | --   |
|            | Ca(ICC2/PI489777)SNP_19338 | 972  | C | A | 25 | 14 | --     | --   |
|            | Ca(ICC2/PI489777)SNP_19339 | 1314 | C | T | 31 | 14 | --     | --   |
| CakTC27762 | Ca(ICC2/PI489777)SNP_19340 | 184  | T | C | 4  | 3  | --     | GNAT |
|            | Ca(ICC2/PI489777)SNP_19341 | 236  | A | G | 4  | 3  | --     | GNAT |
| CakTC40295 | Ca(ICC2/PI489777)SNP_19342 | 596  | G | T | 49 | 32 | --     | --   |
|            | Ca(ICC2/PI489777)SNP_19343 | 629  | G | C | 38 | 31 | --     | --   |
|            | Ca(ICC2/PI489777)SNP_19344 | 652  | G | A | 44 | 29 | --     | --   |
|            | Ca(ICC2/PI489777)SNP_19345 | 661  | A | G | 44 | 30 | --     | --   |
| CakTC26510 | Ca(ICC2/PI489777)SNP_19346 | 1820 | G | T | 12 | 3  | --     | --   |
|            | Ca(ICC2/PI489777)SNP_19347 | 1821 | A | T | 12 | 3  | --     | --   |
| CakTC39757 | Ca(ICC2/PI489777)SNP_19348 | 51   | C | A | 10 | 10 | --     | --   |
|            | Ca(ICC2/PI489777)SNP_19349 | 318  | A | G | 13 | 11 | --     | --   |
|            | Ca(ICC2/PI489777)SNP_19350 | 653  | A | G | 10 | 9  | --     | --   |
| CakTC29995 | Ca(ICC2/PI489777)SNP_19351 | 304  | C | T | 8  | 4  | --     | --   |
| CakTC28780 | Ca(ICC2/PI489777)SNP_19352 | 260  | C | T | 11 | 3  | --     | --   |
|            | Ca(ICC2/PI489777)SNP_19353 | 1509 | C | A | 11 | 6  | --     | --   |
| CakTC30491 | Ca(ICC2/PI489777)SNP_19354 | 1416 | T | C | 9  | 4  | --     | --   |
| CakTC26507 | Ca(ICC2/PI489777)SNP_19355 | 856  | T | A | 5  | 7  | Flower | bud  |
| CakTC32392 | Ca(ICC2/PI489777)SNP_19356 | 59   | A | G | 23 | 23 | --     | --   |
| CakTC39139 | Ca(ICC2/PI489777)SNP_19357 | 1403 | A | G | 17 | 21 | --     | --   |
| CakTC22389 | Ca(ICC2/PI489777)SNP_19358 | 448  | G | T | 4  | 4  | --     | --   |
|            | Ca(ICC2/PI489777)SNP_19359 | 471  | C | G | 4  | 5  | --     | --   |
|            | Ca(ICC2/PI489777)SNP_19360 | 756  | G | C | 12 | 3  | --     | --   |
|            | Ca(ICC2/PI489777)SNP_19361 | 1125 | C | T | 52 | 9  | --     | --   |
|            | Ca(ICC2/PI489777)SNP_19362 | 1193 | C | T | 60 | 9  | --     | --   |
|            | Ca(ICC2/PI489777)SNP_19363 | 1292 | T | C | 58 | 8  | --     | --   |
|            | Ca(ICC2/PI489777)SNP_19364 | 1341 | T | C | 68 | 8  | --     | --   |
|            | Ca(ICC2/PI489777)SNP_19365 | 1355 | C | T | 69 | 5  | --     | --   |
|            | Ca(ICC2/PI489777)SNP_19366 | 1358 | T | C | 68 | 5  | --     | --   |
|            | Ca(ICC2/PI489777)SNP_19367 | 1373 | G | T | 66 | 5  | --     | --   |
|            | Ca(ICC2/PI489777)SNP_19368 | 1392 | G | A | 65 | 6  | --     | --   |
|            | Ca(ICC2/PI489777)SNP_19369 | 1454 | C | T | 61 | 9  | --     | --   |
|            | Ca(ICC2/PI489777)SNP_19370 | 1466 | T | C | 49 | 7  | --     | --   |
|            | Ca(ICC2/PI489777)SNP_19371 | 1493 | T | G | 48 | 8  | --     | --   |
|            | Ca(ICC2/PI489777)SNP_19372 | 1844 | T | C | 43 | 13 | --     | --   |
|            | Ca(ICC2/PI489777)SNP_19373 | 1850 | C | T | 40 | 13 | --     | --   |
|            | Ca(ICC2/PI489777)SNP_19374 | 1944 | C | G | 24 | 7  | --     | --   |
|            | Ca(ICC2/PI489777)SNP_19375 | 1961 | A | G | 19 | 7  | --     | --   |
|            | Ca(ICC2/PI489777)SNP_19376 | 1992 | A | T | 19 | 6  | --     | --   |
|            | Ca(ICC2/PI489777)SNP_19377 | 1997 | C | T | 19 | 6  | --     | --   |
| CakTC37269 | Ca(ICC2/PI489777)SNP_19378 | 1887 | C | T | 9  | 8  | --     | --   |
| CakTC29920 | Ca(ICC2/PI489777)SNP_19379 | 836  | T | C | 35 | 37 | --     | --   |
|            | Ca(ICC2/PI489777)SNP_19380 | 2306 | T | A | 31 | 7  | --     | --   |
| CakTC30664 | Ca(ICC2/PI489777)SNP_19381 | 700  | C | A | 4  | 3  | --     | --   |
|            | Ca(ICC2/PI489777)SNP_19382 | 720  | C | T | 4  | 4  | --     | --   |
|            | Ca(ICC2/PI489777)SNP_19383 | 1092 | G | A | 4  | 5  | --     | --   |

|            |                            |      |   |   |    |    |           |      |
|------------|----------------------------|------|---|---|----|----|-----------|------|
|            | Ca(ICC2/PI489777)SNP_19384 | 1149 | T | G | 3  | 5  | --        | --   |
|            | Ca(ICC2/PI489777)SNP_19385 | 1323 | G | T | 4  | 4  | --        | --   |
|            | Ca(ICC2/PI489777)SNP_19386 | 1474 | G | A | 3  | 4  | --        | --   |
| CakTC08223 | Ca(ICC2/PI489777)SNP_19387 | 382  | A | G | 7  | 3  | --        | --   |
|            | Ca(ICC2/PI489777)SNP_19388 | 385  | G | A | 8  | 3  | --        | --   |
|            | Ca(ICC2/PI489777)SNP_19389 | 399  | G | C | 8  | 3  | --        | --   |
| CakTC37655 | Ca(ICC2/PI489777)SNP_19390 | 123  | A | G | 10 | 4  | --        | --   |
|            | Ca(ICC2/PI489777)SNP_19391 | 361  | T | C | 24 | 9  | --        | --   |
|            | Ca(ICC2/PI489777)SNP_19392 | 1066 | T | C | 9  | 3  | --        | --   |
| CakTC41423 | Ca(ICC2/PI489777)SNP_19393 | 1571 | T | C | 7  | 3  | --        | --   |
|            | Ca(ICC2/PI489777)SNP_19394 | 2375 | G | A | 6  | 7  | --        | --   |
| CakTC38806 | Ca(ICC2/PI489777)SNP_19395 | 814  | C | G | 16 | 5  | --        | --   |
| CakTC09581 | Ca(ICC2/PI489777)SNP_19396 | 505  | A | G | 3  | 9  | --        | --   |
|            | Ca(ICC2/PI489777)SNP_19397 | 697  | A | C | 4  | 3  | --        | --   |
| CakTC37476 | Ca(ICC2/PI489777)SNP_19398 | 409  | C | T | 3  | 3  | --        | --   |
| CakTC42591 | Ca(ICC2/PI489777)SNP_19399 | 102  | T | C | 7  | 5  | --        | --   |
| CakTC39596 | Ca(ICC2/PI489777)SNP_19400 | 276  | C | T | 19 | 13 | --        | --   |
|            | Ca(ICC2/PI489777)SNP_19401 | 370  | A | G | 19 | 8  | --        | --   |
|            | Ca(ICC2/PI489777)SNP_19402 | 551  | A | G | 8  | 8  | --        | --   |
|            | Ca(ICC2/PI489777)SNP_19403 | 555  | A | T | 7  | 8  | --        | --   |
|            | Ca(ICC2/PI489777)SNP_19404 | 952  | C | G | 16 | 11 | --        | --   |
|            | Ca(ICC2/PI489777)SNP_19405 | 1247 | G | C | 5  | 5  | --        | --   |
| CakTC17136 | Ca(ICC2/PI489777)SNP_19406 | 2328 | T | A | 8  | 4  | --        | --   |
| CakTC27790 | Ca(ICC2/PI489777)SNP_19407 | 750  | A | G | 3  | 3  | Flower    | bud  |
|            | Ca(ICC2/PI489777)SNP_19408 | 834  | C | T | 4  | 3  | Flower    | bud  |
|            | Ca(ICC2/PI489777)SNP_19409 | 858  | C | T | 4  | 3  | Flower    | bud  |
| CakTC28154 | Ca(ICC2/PI489777)SNP_19410 | 592  | G | C | 57 | 77 | --        | --   |
| CakTC31438 | Ca(ICC2/PI489777)SNP_19411 | 1565 | T | C | 3  | 3  | --        | --   |
|            | Ca(ICC2/PI489777)SNP_19412 | 1640 | T | C | 3  | 3  | --        | --   |
| CakTC43175 | Ca(ICC2/PI489777)SNP_19413 | 100  | A | G | 14 | 5  | --        | --   |
|            | Ca(ICC2/PI489777)SNP_19414 | 104  | G | C | 14 | 6  | --        | --   |
|            | Ca(ICC2/PI489777)SNP_19415 | 203  | T | C | 19 | 7  | --        | --   |
|            | Ca(ICC2/PI489777)SNP_19416 | 830  | C | A | 52 | 33 | --        | --   |
|            | Ca(ICC2/PI489777)SNP_19417 | 1742 | C | T | 17 | 17 | --        | --   |
| CakTC35175 | Ca(ICC2/PI489777)SNP_19418 | 699  | G | A | 3  | 4  | --        | --   |
| CakTC38724 | Ca(ICC2/PI489777)SNP_19419 | 190  | C | T | 14 | 3  | --        | --   |
|            | Ca(ICC2/PI489777)SNP_19420 | 1086 | T | C | 4  | 4  | --        | --   |
| CakTC27176 | Ca(ICC2/PI489777)SNP_19421 | 1034 | G | A | 29 | 3  | Young_pod | --   |
|            | Ca(ICC2/PI489777)SNP_19422 | 1040 | G | A | 27 | 3  | Young_pod | --   |
| CakTC31950 | Ca(ICC2/PI489777)SNP_19423 | 358  | G | A | 3  | 11 | Root      | --   |
| CakTC39646 | Ca(ICC2/PI489777)SNP_19424 | 824  | C | T | 7  | 8  | --        | --   |
|            | Ca(ICC2/PI489777)SNP_19425 | 1284 | A | G | 9  | 3  | --        | --   |
|            | Ca(ICC2/PI489777)SNP_19426 | 1335 | T | G | 13 | 4  | --        | --   |
| CakTC41881 | Ca(ICC2/PI489777)SNP_19427 | 653  | A | G | 17 | 12 | --        | --   |
| CakTC27556 | Ca(ICC2/PI489777)SNP_19428 | 360  | A | G | 4  | 3  | --        | C2H2 |
| CakTC26431 | Ca(ICC2/PI489777)SNP_19429 | 65   | A | T | 3  | 4  | --        | --   |
|            | Ca(ICC2/PI489777)SNP_19430 | 96   | A | T | 8  | 6  | --        | --   |
|            | Ca(ICC2/PI489777)SNP_19431 | 239  | A | G | 11 | 7  | --        | --   |
| CakTC40519 | Ca(ICC2/PI489777)SNP_19432 | 1915 | G | A | 11 | 12 | --        | --   |
|            | Ca(ICC2/PI489777)SNP_19433 | 1950 | G | A | 12 | 13 | --        | --   |
|            | Ca(ICC2/PI489777)SNP_19434 | 1990 | A | G | 14 | 13 | --        | --   |
|            | Ca(ICC2/PI489777)SNP_19435 | 2089 | G | C | 10 | 13 | --        | --   |
| CakTC25969 | Ca(ICC2/PI489777)SNP_19436 | 758  | T | C | 58 | 35 | --        | --   |
|            | Ca(ICC2/PI489777)SNP_19437 | 5125 | T | C | 29 | 11 | --        | --   |
| CakTC26204 | Ca(ICC2/PI489777)SNP_19438 | 545  | C | T | 10 | 5  | Shoot     | BES1 |
| CakTC37250 | Ca(ICC2/PI489777)SNP_19439 | 379  | A | G | 11 | 11 | Root      | bHLH |
|            | Ca(ICC2/PI489777)SNP_19440 | 481  | C | A | 10 | 10 | Root      | bHLH |
| CakTC25733 | Ca(ICC2/PI489777)SNP_19441 | 362  | T | C | 34 | 12 | --        | --   |
|            | Ca(ICC2/PI489777)SNP_19442 | 524  | C | T | 47 | 11 | --        | --   |
|            | Ca(ICC2/PI489777)SNP_19443 | 1271 | C | T | 56 | 7  | --        | --   |
|            | Ca(ICC2/PI489777)SNP_19444 | 2753 | T | C | 90 | 18 | --        | --   |
| CakTC28951 | Ca(ICC2/PI489777)SNP_19445 | 265  | A | G | 3  | 5  | --        | --   |
| CakTC38349 | Ca(ICC2/PI489777)SNP_19446 | 765  | A | G | 16 | 19 | --        | --   |
| CakTC40077 | Ca(ICC2/PI489777)SNP_19447 | 538  | A | C | 24 | 31 | --        | --   |
|            | Ca(ICC2/PI489777)SNP_19448 | 1036 | A | G | 21 | 14 | --        | --   |
| CakTC10056 | Ca(ICC2/PI489777)SNP_19449 | 1433 | G | A | 4  | 3  | --        | --   |
| CakTC17327 | Ca(ICC2/PI489777)SNP_19450 | 1062 | T | C | 14 | 10 | --        | --   |
| CakTC30343 | Ca(ICC2/PI489777)SNP_19451 | 950  | G | A | 4  | 3  | --        | --   |
| CakTC10359 | Ca(ICC2/PI489777)SNP_19452 | 1399 | G | A | 3  | 3  | --        | --   |
|            | Ca(ICC2/PI489777)SNP_19453 | 1528 | G | A | 3  | 5  | --        | --   |
|            | Ca(ICC2/PI489777)SNP_19454 | 1597 | C | T | 3  | 4  | --        | --   |
|            | Ca(ICC2/PI489777)SNP_19455 | 1954 | T | C | 6  | 3  | --        | --   |
|            | Ca(ICC2/PI489777)SNP_19456 | 2005 | G | A | 5  | 4  | --        | --   |
|            | Ca(ICC2/PI489777)SNP_19457 | 2097 | T | C | 5  | 4  | --        | --   |

|            |                            |      |   |   |     |     |        |             |
|------------|----------------------------|------|---|---|-----|-----|--------|-------------|
|            | Ca(ICC2/PI489777)SNP_19458 | 2248 | C | T | 3   | 5   | --     | --          |
|            | Ca(ICC2/PI489777)SNP_19459 | 2436 | T | C | 3   | 5   | --     | --          |
|            | Ca(ICC2/PI489777)SNP_19460 | 3153 | T | A | 4   | 6   | --     | --          |
| CakTC10761 | Ca(ICC2/PI489777)SNP_19461 | 127  | A | G | 5   | 7   | --     | --          |
|            | Ca(ICC2/PI489777)SNP_19462 | 304  | G | A | 8   | 9   | --     | --          |
| CakTC25160 | Ca(ICC2/PI489777)SNP_19463 | 1419 | G | T | 3   | 3   | --     | --          |
|            | Ca(ICC2/PI489777)SNP_19464 | 1438 | C | G | 4   | 3   | --     | --          |
|            | Ca(ICC2/PI489777)SNP_19465 | 1617 | T | C | 7   | 4   | --     | --          |
|            | Ca(ICC2/PI489777)SNP_19466 | 1656 | C | T | 7   | 4   | --     | --          |
|            | Ca(ICC2/PI489777)SNP_19467 | 1665 | T | C | 9   | 4   | --     | --          |
|            | Ca(ICC2/PI489777)SNP_19468 | 1671 | T | A | 9   | 4   | --     | --          |
| CakTC40817 | Ca(ICC2/PI489777)SNP_19469 | 303  | G | T | 6   | 9   | --     | --          |
|            | Ca(ICC2/PI489777)SNP_19470 | 465  | G | A | 6   | 7   | --     | --          |
|            | Ca(ICC2/PI489777)SNP_19471 | 1015 | G | A | 13  | 3   | --     | --          |
| CakTC36855 | Ca(ICC2/PI489777)SNP_19472 | 1688 | A | A | 14  | 9   | --     | --          |
|            | Ca(ICC2/PI489777)SNP_19473 | 1752 | A | G | 18  | 10  | --     | --          |
| CakTC41955 | Ca(ICC2/PI489777)SNP_19474 | 1025 | G | C | 17  | 4   | --     | --          |
|            | Ca(ICC2/PI489777)SNP_19475 | 1538 | T | C | 7   | 6   | --     | --          |
| CakTC25559 | Ca(ICC2/PI489777)SNP_19476 | 825  | G | A | 82  | 38  | --     | --          |
| CakTC23191 | Ca(ICC2/PI489777)SNP_19477 | 1238 | C | A | 7   | 8   | --     | --          |
|            | Ca(ICC2/PI489777)SNP_19478 | 1787 | G | A | 20  | 7   | --     | --          |
|            | Ca(ICC2/PI489777)SNP_19479 | 2568 | C | T | 13  | 5   | --     | --          |
|            | Ca(ICC2/PI489777)SNP_19480 | 3148 | A | G | 293 | 87  | --     | --          |
| CakTC41304 | Ca(ICC2/PI489777)SNP_19481 | 1173 | T | A | 4   | 3   | --     | GRAS        |
|            | Ca(ICC2/PI489777)SNP_19482 | 1221 | C | A | 6   | 5   | --     | GRAS        |
|            | Ca(ICC2/PI489777)SNP_19483 | 1303 | C | T | 5   | 3   | --     | GRAS        |
|            | Ca(ICC2/PI489777)SNP_19484 | 1896 | A | T | 4   | 3   | --     | GRAS        |
|            | Ca(ICC2/PI489777)SNP_19485 | 2196 | C | A | 3   | 4   | --     | GRAS        |
| CakTC39427 | Ca(ICC2/PI489777)SNP_19486 | 195  | T | C | 6   | 3   | --     | --          |
|            | Ca(ICC2/PI489777)SNP_19487 | 255  | C | T | 7   | 3   | --     | --          |
|            | Ca(ICC2/PI489777)SNP_19488 | 571  | T | G | 6   | 5   | --     | --          |
|            | Ca(ICC2/PI489777)SNP_19489 | 813  | A | C | 5   | 4   | --     | --          |
|            | Ca(ICC2/PI489777)SNP_19490 | 1039 | G | A | 6   | 5   | --     | --          |
| CakTC34840 | Ca(ICC2/PI489777)SNP_19491 | 1599 | A | T | 4   | 6   | --     | --          |
|            | Ca(ICC2/PI489777)SNP_19492 | 2092 | C | T | 10  | 4   | --     | --          |
|            | Ca(ICC2/PI489777)SNP_19493 | 2204 | G | A | 10  | 3   | --     | --          |
|            | Ca(ICC2/PI489777)SNP_19494 | 3367 | T | C | 15  | 5   | --     | --          |
|            | Ca(ICC2/PI489777)SNP_19495 | 3535 | T | C | 10  | 11  | --     | --          |
|            | Ca(ICC2/PI489777)SNP_19496 | 3540 | G | C | 12  | 11  | --     | --          |
|            | Ca(ICC2/PI489777)SNP_19497 | 3645 | A | G | 7   | 8   | --     | --          |
|            | Ca(ICC2/PI489777)SNP_19498 | 3851 | C | T | 5   | 4   | --     | --          |
| CakTC39698 | Ca(ICC2/PI489777)SNP_19499 | 502  | T | C | 3   | 4   | --     | --          |
|            | Ca(ICC2/PI489777)SNP_19500 | 548  | G | T | 3   | 4   | --     | --          |
| CakTC38593 | Ca(ICC2/PI489777)SNP_19501 | 1470 | A | G | 4   | 5   | Flower | bud         |
|            | Ca(ICC2/PI489777)SNP_19502 | 1519 | T | C | 6   | 5   | Flower | bud         |
|            | Ca(ICC2/PI489777)SNP_19503 | 1632 | C | T | 8   | 5   | Flower | bud         |
| CakTC10918 | Ca(ICC2/PI489777)SNP_19504 | 915  | A | C | 9   | 14  | --     | --          |
| CakTC10368 | Ca(ICC2/PI489777)SNP_19505 | 160  | G | A | 14  | 4   | --     | MYB-related |
| CakTC32354 | Ca(ICC2/PI489777)SNP_19506 | 724  | T | C | 5   | 3   | --     | --          |
|            | Ca(ICC2/PI489777)SNP_19507 | 984  | T | G | 4   | 3   | --     | --          |
|            | Ca(ICC2/PI489777)SNP_19508 | 1812 | A | G | 12  | 3   | --     | --          |
| CakTC32076 | Ca(ICC2/PI489777)SNP_19509 | 769  | C | T | 5   | 6   | --     | --          |
| CakTC24742 | Ca(ICC2/PI489777)SNP_19510 | 541  | C | G | 112 | 139 | --     | --          |
|            | Ca(ICC2/PI489777)SNP_19511 | 748  | C | T | 22  | 35  | --     | --          |
| CakTC37151 | Ca(ICC2/PI489777)SNP_19512 | 451  | C | G | 19  | 6   | --     | --          |
|            | Ca(ICC2/PI489777)SNP_19513 | 847  | G | A | 11  | 3   | --     | --          |
|            | Ca(ICC2/PI489777)SNP_19514 | 949  | T | C | 10  | 5   | --     | --          |
|            | Ca(ICC2/PI489777)SNP_19515 | 1201 | C | T | 11  | 10  | --     | --          |
|            | Ca(ICC2/PI489777)SNP_19516 | 1324 | G | A | 16  | 7   | --     | --          |
|            | Ca(ICC2/PI489777)SNP_19517 | 1330 | T | C | 13  | 8   | --     | --          |
|            | Ca(ICC2/PI489777)SNP_19518 | 1458 | A | G | 14  | 9   | --     | --          |
| CakTC24049 | Ca(ICC2/PI489777)SNP_19519 | 1476 | C | T | 8   | 10  | --     | --          |
| CakTC18765 | Ca(ICC2/PI489777)SNP_19520 | 908  | C | T | 5   | 3   | --     | --          |
| CakTC37737 | Ca(ICC2/PI489777)SNP_19521 | 158  | G | C | 5   | 3   | --     | --          |
|            | Ca(ICC2/PI489777)SNP_19522 | 207  | G | T | 7   | 3   | --     | --          |
|            | Ca(ICC2/PI489777)SNP_19523 | 276  | C | T | 8   | 3   | --     | --          |
|            | Ca(ICC2/PI489777)SNP_19524 | 302  | T | A | 8   | 3   | --     | --          |
| CakTC40110 | Ca(ICC2/PI489777)SNP_19525 | 386  | C | A | 13  | 6   | --     | MYB         |
|            | Ca(ICC2/PI489777)SNP_19526 | 657  | T | C | 23  | 9   | --     | MYB         |
|            | Ca(ICC2/PI489777)SNP_19527 | 1065 | G | A | 7   | 3   | --     | MYB         |
| CakTC23073 | Ca(ICC2/PI489777)SNP_19528 | 2146 | A | G | 25  | 12  | --     | HB          |
|            | Ca(ICC2/PI489777)SNP_19529 | 2185 | C | T | 23  | 12  | --     | HB          |
|            | Ca(ICC2/PI489777)SNP_19530 | 2419 | T | C | 13  | 7   | --     | HB          |
| CakTC41058 | Ca(ICC2/PI489777)SNP_19531 | 419  | T | C | 4   | 6   | --     | --          |



|            |                            |      |   |   |     |     |           |    |
|------------|----------------------------|------|---|---|-----|-----|-----------|----|
|            | Ca(ICC2/PI489777)SNP_19532 | 545  | G | A | 3   | 8   | --        | -- |
|            | Ca(ICC2/PI489777)SNP_19533 | 552  | A | G | 3   | 9   | --        | -- |
| CakTC07942 | Ca(ICC2/PI489777)SNP_19534 | 944  | T | C | 3   | 4   | --        | -- |
| CakTC11551 | Ca(ICC2/PI489777)SNP_19535 | 222  | C | T | 16  | 5   | --        | -- |
|            | Ca(ICC2/PI489777)SNP_19536 | 333  | C | T | 18  | 4   | --        | -- |
|            | Ca(ICC2/PI489777)SNP_19537 | 792  | A | G | 14  | 3   | --        | -- |
|            | Ca(ICC2/PI489777)SNP_19538 | 794  | G | A | 14  | 3   | --        | -- |
| CakTC42472 | Ca(ICC2/PI489777)SNP_19539 | 192  | C | T | 17  | 15  | --        | -- |
| CakTC40121 | Ca(ICC2/PI489777)SNP_19540 | 64   | T | A | 19  | 10  | --        | -- |
|            | Ca(ICC2/PI489777)SNP_19541 | 1076 | G | T | 7   | 7   | --        | -- |
| CakTC28180 | Ca(ICC2/PI489777)SNP_19542 | 317  | A | T | 8   | 4   | --        | -- |
|            | Ca(ICC2/PI489777)SNP_19543 | 1115 | A | G | 9   | 5   | --        | -- |
|            | Ca(ICC2/PI489777)SNP_19544 | 1436 | A | G | 5   | 5   | --        | -- |
| CakTC31791 | Ca(ICC2/PI489777)SNP_19545 | 1207 | T | C | 10  | 8   | --        | -- |
| CakTC09751 | Ca(ICC2/PI489777)SNP_19546 | 78   | C | A | 6   | 3   | --        | -- |
|            | Ca(ICC2/PI489777)SNP_19547 | 122  | A | T | 6   | 3   | --        | -- |
|            | Ca(ICC2/PI489777)SNP_19548 | 123  | A | C | 6   | 3   | --        | -- |
|            | Ca(ICC2/PI489777)SNP_19549 | 429  | G | A | 6   | 4   | --        | -- |
|            | Ca(ICC2/PI489777)SNP_19550 | 495  | T | C | 5   | 3   | --        | -- |
|            | Ca(ICC2/PI489777)SNP_19551 | 1273 | G | A | 10  | 4   | --        | -- |
|            | Ca(ICC2/PI489777)SNP_19552 | 1296 | A | G | 6   | 4   | --        | -- |
|            | Ca(ICC2/PI489777)SNP_19553 | 1401 | C | A | 3   | 4   | --        | -- |
|            | Ca(ICC2/PI489777)SNP_19554 | 1447 | G | A | 4   | 4   | --        | -- |
|            | Ca(ICC2/PI489777)SNP_19555 | 1465 | T | C | 4   | 3   | --        | -- |
|            | Ca(ICC2/PI489777)SNP_19556 | 1473 | A | G | 4   | 3   | --        | -- |
|            | Ca(ICC2/PI489777)SNP_19557 | 1768 | C | T | 4   | 3   | --        | -- |
|            | Ca(ICC2/PI489777)SNP_19558 | 2128 | G | A | 3   | 3   | --        | -- |
| CakTC18621 | Ca(ICC2/PI489777)SNP_19559 | 229  | A | G | 9   | 7   | --        | -- |
|            | Ca(ICC2/PI489777)SNP_19560 | 387  | C | T | 16  | 7   | --        | -- |
|            | Ca(ICC2/PI489777)SNP_19561 | 450  | G | C | 18  | 5   | --        | -- |
|            | Ca(ICC2/PI489777)SNP_19562 | 513  | A | G | 15  | 4   | --        | -- |
|            | Ca(ICC2/PI489777)SNP_19563 | 783  | T | C | 23  | 4   | --        | -- |
|            | Ca(ICC2/PI489777)SNP_19564 | 1194 | T | C | 23  | 14  | --        | -- |
|            | Ca(ICC2/PI489777)SNP_19565 | 1461 | T | G | 35  | 13  | --        | -- |
| CakTC34978 | Ca(ICC2/PI489777)SNP_19566 | 1213 | C | T | 11  | 6   | --        | -- |
|            | Ca(ICC2/PI489777)SNP_19567 | 1763 | G | A | 7   | 7   | --        | -- |
| CakTC41249 | Ca(ICC2/PI489777)SNP_19568 | 146  | T | A | 3   | 14  | --        | -- |
|            | Ca(ICC2/PI489777)SNP_19569 | 307  | A | C | 15  | 13  | --        | -- |
|            | Ca(ICC2/PI489777)SNP_19570 | 1804 | G | T | 17  | 13  | --        | -- |
|            | Ca(ICC2/PI489777)SNP_19571 | 2022 | T | C | 11  | 13  | --        | -- |
| CakTC13768 | Ca(ICC2/PI489777)SNP_19572 | 1793 | C | T | 5   | 4   | Young_pod | -- |
| CakTC42308 | Ca(ICC2/PI489777)SNP_19573 | 468  | T | A | 56  | 44  | --        | -- |
|            | Ca(ICC2/PI489777)SNP_19574 | 772  | G | A | 44  | 37  | --        | -- |
| CakTC39551 | Ca(ICC2/PI489777)SNP_19575 | 212  | C | A | 3   | 3   | --        | -- |
| CakTC38807 | Ca(ICC2/PI489777)SNP_19576 | 38   | T | C | 8   | 4   | --        | -- |
|            | Ca(ICC2/PI489777)SNP_19577 | 91   | A | C | 11  | 5   | --        | -- |
|            | Ca(ICC2/PI489777)SNP_19578 | 236  | C | A | 15  | 15  | --        | -- |
|            | Ca(ICC2/PI489777)SNP_19579 | 389  | A | G | 12  | 12  | --        | -- |
|            | Ca(ICC2/PI489777)SNP_19580 | 392  | T | C | 8   | 9   | --        | -- |
|            | Ca(ICC2/PI489777)SNP_19581 | 644  | G | C | 11  | 9   | --        | -- |
| CakTC24140 | Ca(ICC2/PI489777)SNP_19582 | 794  | C | T | 8   | 4   | --        | -- |
|            | Ca(ICC2/PI489777)SNP_19583 | 1215 | A | G | 154 | 70  | --        | -- |
|            | Ca(ICC2/PI489777)SNP_19584 | 1465 | G | A | 15  | 3   | --        | -- |
|            | Ca(ICC2/PI489777)SNP_19585 | 1518 | G | T | 16  | 3   | --        | -- |
| CakTC28850 | Ca(ICC2/PI489777)SNP_19586 | 50   | T | G | 3   | 5   | --        | -- |
|            | Ca(ICC2/PI489777)SNP_19587 | 125  | A | G | 3   | 14  | --        | -- |
|            | Ca(ICC2/PI489777)SNP_19588 | 140  | A | T | 4   | 13  | --        | -- |
| CakTC32517 | Ca(ICC2/PI489777)SNP_19589 | 712  | A | G | 3   | 4   | --        | -- |
| CakTC43214 | Ca(ICC2/PI489777)SNP_19590 | 236  | C | T | 17  | 7   | --        | -- |
|            | Ca(ICC2/PI489777)SNP_19591 | 345  | C | T | 19  | 14  | --        | -- |
| CakTC31484 | Ca(ICC2/PI489777)SNP_19592 | 1130 | A | C | 3   | 3   | --        | -- |
| CakTC08902 | Ca(ICC2/PI489777)SNP_19593 | 429  | G | C | 65  | 80  | --        | -- |
|            | Ca(ICC2/PI489777)SNP_19594 | 1245 | G | T | 84  | 179 | --        | -- |
| CakTC42372 | Ca(ICC2/PI489777)SNP_19595 | 1147 | G | C | 3   | 4   | --        | -- |
| CakTC10846 | Ca(ICC2/PI489777)SNP_19596 | 217  | G | A | 3   | 4   | Young_pod | -- |
|            | Ca(ICC2/PI489777)SNP_19597 | 424  | G | C | 3   | 8   | Young_pod | -- |
| CakTC41873 | Ca(ICC2/PI489777)SNP_19598 | 135  | T | C | 9   | 11  | --        | -- |
|            | Ca(ICC2/PI489777)SNP_19599 | 634  | A | G | 41  | 15  | --        | -- |
|            | Ca(ICC2/PI489777)SNP_19600 | 1787 | C | T | 6   | 7   | --        | -- |
| CakTC38286 | Ca(ICC2/PI489777)SNP_19601 | 40   | T | C | 5   | 12  | Young_pod | -- |
|            | Ca(ICC2/PI489777)SNP_19602 | 482  | C | T | 26  | 24  | Young_pod | -- |
|            | Ca(ICC2/PI489777)SNP_19603 | 615  | A | G | 12  | 17  | Young_pod | -- |
|            | Ca(ICC2/PI489777)SNP_19604 | 674  | G | A | 17  | 20  | Young_pod | -- |
|            | Ca(ICC2/PI489777)SNP_19605 | 770  | C | T | 24  | 19  | Young_pod | -- |

|            |                            |      |   |   |    |    |           |     |
|------------|----------------------------|------|---|---|----|----|-----------|-----|
|            | Ca(ICC2/PI489777)SNP_19606 | 967  | C | G | 14 | 11 | Young_pod | --  |
|            | Ca(ICC2/PI489777)SNP_19607 | 968  | T | C | 14 | 11 | Young_pod | --  |
|            | Ca(ICC2/PI489777)SNP_19608 | 993  | C | A | 14 | 9  | Young_pod | --  |
| CakTC42131 | Ca(ICC2/PI489777)SNP_19609 | 354  | C | T | 4  | 6  | --        | --  |
| CakTC25379 | Ca(ICC2/PI489777)SNP_19610 | 461  | C | T | 9  | 6  | --        | --  |
|            | Ca(ICC2/PI489777)SNP_19611 | 465  | G | C | 8  | 6  | --        | --  |
| CakTC31716 | Ca(ICC2/PI489777)SNP_19612 | 135  | C | T | 4  | 6  | --        | --  |
|            | Ca(ICC2/PI489777)SNP_19613 | 141  | C | T | 4  | 9  | --        | --  |
|            | Ca(ICC2/PI489777)SNP_19614 | 145  | C | T | 4  | 9  | --        | --  |
|            | Ca(ICC2/PI489777)SNP_19615 | 179  | T | C | 3  | 9  | --        | --  |
|            | Ca(ICC2/PI489777)SNP_19616 | 207  | T | C | 4  | 11 | --        | --  |
|            | Ca(ICC2/PI489777)SNP_19617 | 217  | A | G | 6  | 9  | --        | --  |
|            | Ca(ICC2/PI489777)SNP_19618 | 220  | A | C | 6  | 9  | --        | --  |
|            | Ca(ICC2/PI489777)SNP_19619 | 271  | G | A | 9  | 9  | --        | --  |
| CakTC08349 | Ca(ICC2/PI489777)SNP_19620 | 117  | G | A | 15 | 6  | --        | --  |
|            | Ca(ICC2/PI489777)SNP_19621 | 408  | T | C | 22 | 12 | --        | --  |
| CakTC39838 | Ca(ICC2/PI489777)SNP_19622 | 697  | T | C | 55 | 13 | --        | --  |
|            | Ca(ICC2/PI489777)SNP_19623 | 981  | G | A | 36 | 19 | --        | --  |
|            | Ca(ICC2/PI489777)SNP_19624 | 1370 | G | A | 18 | 7  | --        | --  |
|            | Ca(ICC2/PI489777)SNP_19625 | 1442 | T | C | 14 | 5  | --        | --  |
|            | Ca(ICC2/PI489777)SNP_19626 | 1474 | T | C | 13 | 5  | --        | --  |
|            | Ca(ICC2/PI489777)SNP_19627 | 1578 | T | G | 8  | 6  | --        | --  |
| CakTC37168 | Ca(ICC2/PI489777)SNP_19628 | 227  | C | T | 3  | 4  | --        | --  |
| CakTC32772 | Ca(ICC2/PI489777)SNP_19629 | 627  | A | G | 20 | 3  | Flower    | bud |
|            | Ca(ICC2/PI489777)SNP_19630 | 643  | G | A | 21 | 3  | Flower    | bud |
|            | Ca(ICC2/PI489777)SNP_19631 | 652  | T | C | 17 | 3  | Flower    | bud |
|            | Ca(ICC2/PI489777)SNP_19632 | 653  | T | G | 17 | 3  | Flower    | bud |
|            | Ca(ICC2/PI489777)SNP_19633 | 668  | A | G | 20 | 3  | Flower    | bud |
|            | Ca(ICC2/PI489777)SNP_19634 | 776  | C | T | 16 | 5  | Flower    | bud |
|            | Ca(ICC2/PI489777)SNP_19635 | 803  | G | A | 13 | 5  | Flower    | bud |
|            | Ca(ICC2/PI489777)SNP_19636 | 1533 | C | T | 14 | 5  | Flower    | bud |
|            | Ca(ICC2/PI489777)SNP_19637 | 1593 | G | A | 13 | 7  | Flower    | bud |
| CakTC24026 | Ca(ICC2/PI489777)SNP_19638 | 1423 | G | A | 12 | 3  | --        | --  |
| CakTC25270 | Ca(ICC2/PI489777)SNP_19639 | 1318 | T | A | 21 | 3  | --        | BSD |
| CakTC42383 | Ca(ICC2/PI489777)SNP_19640 | 134  | C | T | 13 | 3  | --        | --  |
| CakTC26890 | Ca(ICC2/PI489777)SNP_19641 | 766  | C | T | 4  | 5  | --        | --  |
| CakTC33638 | Ca(ICC2/PI489777)SNP_19642 | 373  | G | A | 16 | 9  | --        | --  |
|            | Ca(ICC2/PI489777)SNP_19643 | 435  | A | C | 16 | 11 | --        | --  |
|            | Ca(ICC2/PI489777)SNP_19644 | 436  | T | A | 16 | 10 | --        | --  |
| CakTC41676 | Ca(ICC2/PI489777)SNP_19645 | 52   | A | G | 5  | 5  | --        | --  |
|            | Ca(ICC2/PI489777)SNP_19646 | 156  | T | A | 8  | 5  | --        | --  |
|            | Ca(ICC2/PI489777)SNP_19647 | 216  | T | C | 8  | 5  | --        | --  |
|            | Ca(ICC2/PI489777)SNP_19648 | 357  | C | G | 7  | 6  | --        | --  |
| CakTC38800 | Ca(ICC2/PI489777)SNP_19649 | 1406 | A | G | 42 | 23 | --        | --  |
| CakTC08922 | Ca(ICC2/PI489777)SNP_19650 | 317  | A | G | 4  | 16 | --        | --  |
|            | Ca(ICC2/PI489777)SNP_19651 | 327  | C | T | 4  | 15 | --        | --  |
|            | Ca(ICC2/PI489777)SNP_19652 | 955  | A | G | 11 | 10 | --        | --  |
|            | Ca(ICC2/PI489777)SNP_19653 | 1087 | G | C | 10 | 10 | --        | --  |
|            | Ca(ICC2/PI489777)SNP_19654 | 1138 | G | T | 9  | 4  | --        | --  |
| CakTC12615 | Ca(ICC2/PI489777)SNP_19655 | 1053 | T | C | 42 | 18 | --        | --  |
|            | Ca(ICC2/PI489777)SNP_19656 | 1542 | T | A | 72 | 26 | --        | --  |
|            | Ca(ICC2/PI489777)SNP_19657 | 1735 | G | A | 11 | 10 | --        | --  |
| CakTC27063 | Ca(ICC2/PI489777)SNP_19658 | 50   | T | C | 5  | 3  | --        | --  |
|            | Ca(ICC2/PI489777)SNP_19659 | 102  | C | G | 12 | 5  | --        | --  |
|            | Ca(ICC2/PI489777)SNP_19660 | 173  | T | C | 13 | 8  | --        | --  |
|            | Ca(ICC2/PI489777)SNP_19661 | 200  | C | T | 13 | 4  | --        | --  |
|            | Ca(ICC2/PI489777)SNP_19662 | 229  | G | C | 14 | 7  | --        | --  |
|            | Ca(ICC2/PI489777)SNP_19663 | 293  | C | G | 14 | 7  | --        | --  |
|            | Ca(ICC2/PI489777)SNP_19664 | 487  | G | A | 18 | 8  | --        | --  |
|            | Ca(ICC2/PI489777)SNP_19665 | 536  | G | C | 18 | 11 | --        | --  |
|            | Ca(ICC2/PI489777)SNP_19666 | 564  | A | C | 16 | 9  | --        | --  |
|            | Ca(ICC2/PI489777)SNP_19667 | 570  | C | T | 20 | 10 | --        | --  |
|            | Ca(ICC2/PI489777)SNP_19668 | 1052 | C | T | 37 | 9  | --        | --  |
|            | Ca(ICC2/PI489777)SNP_19669 | 1565 | A | G | 36 | 14 | --        | --  |
|            | Ca(ICC2/PI489777)SNP_19670 | 1566 | C | A | 36 | 13 | --        | --  |
|            | Ca(ICC2/PI489777)SNP_19671 | 1638 | C | T | 32 | 12 | --        | --  |
|            | Ca(ICC2/PI489777)SNP_19672 | 1710 | T | C | 36 | 13 | --        | --  |
|            | Ca(ICC2/PI489777)SNP_19673 | 2020 | C | G | 18 | 11 | --        | --  |
|            | Ca(ICC2/PI489777)SNP_19674 | 2528 | C | G | 11 | 5  | --        | --  |
|            | Ca(ICC2/PI489777)SNP_19675 | 2603 | T | A | 7  | 5  | --        | --  |
| CakTC27861 | Ca(ICC2/PI489777)SNP_19676 | 795  | G | A | 6  | 4  | --        | --  |
|            | Ca(ICC2/PI489777)SNP_19677 | 901  | A | G | 6  | 6  | --        | --  |
|            | Ca(ICC2/PI489777)SNP_19678 | 1080 | T | C | 8  | 5  | --        | --  |
|            | Ca(ICC2/PI489777)SNP_19679 | 1845 | T | G | 10 | 6  | --        | --  |

|            |                             |      |   |   |    |    |        |     |
|------------|-----------------------------|------|---|---|----|----|--------|-----|
| CakTC24575 | Ca(ICCV2/PI489777)SNP_19680 | 429  | A | G | 12 | 5  | --     | --  |
|            | Ca(ICCV2/PI489777)SNP_19681 | 441  | T | A | 11 | 5  | --     | --  |
|            | Ca(ICCV2/PI489777)SNP_19682 | 457  | A | T | 9  | 5  | --     | --  |
| CakTC33132 | Ca(ICCV2/PI489777)SNP_19683 | 120  | C | T | 11 | 10 | --     | --  |
|            | Ca(ICCV2/PI489777)SNP_19684 | 663  | T | C | 22 | 26 | --     | --  |
|            | Ca(ICCV2/PI489777)SNP_19685 | 666  | T | G | 21 | 25 | --     | --  |
|            | Ca(ICCV2/PI489777)SNP_19686 | 753  | C | T | 25 | 31 | --     | --  |
|            | Ca(ICCV2/PI489777)SNP_19687 | 1134 | T | A | 31 | 35 | --     | --  |
|            | Ca(ICCV2/PI489777)SNP_19688 | 1620 | T | C | 22 | 34 | --     | --  |
|            | Ca(ICCV2/PI489777)SNP_19689 | 1635 | C | T | 21 | 33 | --     | --  |
|            | Ca(ICCV2/PI489777)SNP_19690 | 1890 | G | A | 32 | 26 | --     | --  |
|            | Ca(ICCV2/PI489777)SNP_19691 | 2068 | C | T | 25 | 21 | --     | --  |
|            | Ca(ICCV2/PI489777)SNP_19692 | 2092 | A | T | 22 | 20 | --     | --  |
|            | Ca(ICCV2/PI489777)SNP_19693 | 2116 | A | C | 20 | 16 | --     | --  |
|            | Ca(ICCV2/PI489777)SNP_19694 | 2135 | T | C | 15 | 12 | --     | --  |
| CakTC31363 | Ca(ICCV2/PI489777)SNP_19695 | 1595 | T | C | 8  | 5  | --     | --  |
|            | Ca(ICCV2/PI489777)SNP_19696 | 1756 | A | G | 7  | 4  | --     | --  |
|            | Ca(ICCV2/PI489777)SNP_19697 | 1781 | C | T | 6  | 4  | --     | --  |
|            | Ca(ICCV2/PI489777)SNP_19698 | 1785 | G | T | 6  | 5  | --     | --  |
|            | Ca(ICCV2/PI489777)SNP_19699 | 1830 | G | A | 5  | 5  | --     | --  |
| CakTC11567 | Ca(ICCV2/PI489777)SNP_19700 | 447  | A | G | 10 | 3  | --     | MYB |
| CakTC29766 | Ca(ICCV2/PI489777)SNP_19701 | 372  | T | C | 21 | 5  | --     | --  |
|            | Ca(ICCV2/PI489777)SNP_19702 | 656  | C | G | 12 | 3  | --     | --  |
|            | Ca(ICCV2/PI489777)SNP_19703 | 1163 | A | G | 6  | 14 | --     | --  |
| CakTC33528 | Ca(ICCV2/PI489777)SNP_19704 | 90   | C | T | 63 | 55 | --     | --  |
| CakTC33821 | Ca(ICCV2/PI489777)SNP_19705 | 385  | T | C | 34 | 20 | --     | --  |
| CakTC28514 | Ca(ICCV2/PI489777)SNP_19706 | 550  | T | C | 3  | 7  | --     | LUG |
| CakTC28613 | Ca(ICCV2/PI489777)SNP_19707 | 2744 | A | G | 5  | 5  | --     | --  |
| CakTC29634 | Ca(ICCV2/PI489777)SNP_19708 | 919  | G | A | 4  | 3  | --     | --  |
| CakTC33723 | Ca(ICCV2/PI489777)SNP_19709 | 676  | A | G | 12 | 25 | --     | --  |
|            | Ca(ICCV2/PI489777)SNP_19710 | 1765 | G | A | 18 | 16 | --     | --  |
| CakTC00336 | Ca(ICCV2/PI489777)SNP_19711 | 385  | C | G | 22 | 17 | --     | --  |
|            | Ca(ICCV2/PI489777)SNP_19712 | 798  | G | T | 67 | 6  | --     | --  |
| CakTC27395 | Ca(ICCV2/PI489777)SNP_19713 | 680  | C | G | 10 | 4  | --     | --  |
|            | Ca(ICCV2/PI489777)SNP_19714 | 1127 | A | T | 17 | 3  | --     | --  |
|            | Ca(ICCV2/PI489777)SNP_19715 | 1279 | G | C | 14 | 3  | --     | --  |
| CakTC41342 | Ca(ICCV2/PI489777)SNP_19716 | 1249 | G | A | 22 | 22 | --     | --  |
|            | Ca(ICCV2/PI489777)SNP_19717 | 1384 | A | G | 20 | 13 | --     | --  |
| CakTC06879 | Ca(ICCV2/PI489777)SNP_19718 | 945  | A | G | 6  | 9  | --     | --  |
|            | Ca(ICCV2/PI489777)SNP_19719 | 957  | G | C | 6  | 9  | --     | --  |
| CakTC07683 | Ca(ICCV2/PI489777)SNP_19720 | 467  | G | A | 20 | 16 | --     | --  |
|            | Ca(ICCV2/PI489777)SNP_19721 | 577  | G | C | 17 | 12 | --     | --  |
|            | Ca(ICCV2/PI489777)SNP_19722 | 824  | T | G | 3  | 4  | --     | --  |
| CakTC34868 | Ca(ICCV2/PI489777)SNP_19723 | 2255 | G | A | 3  | 5  | --     | --  |
| CakTC10001 | Ca(ICCV2/PI489777)SNP_19724 | 71   | A | C | 6  | 9  | --     | --  |
| CakTC34451 | Ca(ICCV2/PI489777)SNP_19725 | 277  | C | T | 4  | 6  | --     | --  |
| CakTC32931 | Ca(ICCV2/PI489777)SNP_19726 | 1763 | T | G | 17 | 12 | --     | --  |
|            | Ca(ICCV2/PI489777)SNP_19727 | 2486 | C | T | 8  | 4  | --     | --  |
| CakTC30981 | Ca(ICCV2/PI489777)SNP_19728 | 277  | G | A | 7  | 9  | --     | --  |
|            | Ca(ICCV2/PI489777)SNP_19729 | 411  | T | C | 10 | 9  | --     | --  |
|            | Ca(ICCV2/PI489777)SNP_19730 | 524  | C | T | 6  | 7  | --     | --  |
| CakTC40429 | Ca(ICCV2/PI489777)SNP_19731 | 653  | C | A | 12 | 6  | --     | --  |
|            | Ca(ICCV2/PI489777)SNP_19732 | 782  | G | A | 11 | 6  | --     | --  |
|            | Ca(ICCV2/PI489777)SNP_19733 | 854  | G | A | 9  | 5  | --     | --  |
| CakTC40877 | Ca(ICCV2/PI489777)SNP_19734 | 693  | C | T | 11 | 14 | --     | --  |
|            | Ca(ICCV2/PI489777)SNP_19735 | 718  | T | C | 9  | 13 | --     | --  |
|            | Ca(ICCV2/PI489777)SNP_19736 | 723  | A | G | 7  | 12 | --     | --  |
|            | Ca(ICCV2/PI489777)SNP_19737 | 749  | T | A | 6  | 10 | --     | --  |
|            | Ca(ICCV2/PI489777)SNP_19738 | 770  | A | G | 4  | 8  | --     | --  |
| CakTC43369 | Ca(ICCV2/PI489777)SNP_19739 | 932  | A | G | 13 | 3  | Flower | bud |
| CakTC11481 | Ca(ICCV2/PI489777)SNP_19740 | 663  | T | C | 3  | 3  | --     | --  |
| CakTC33406 | Ca(ICCV2/PI489777)SNP_19741 | 305  | G | A | 6  | 8  | --     | --  |
| CakTC29515 | Ca(ICCV2/PI489777)SNP_19742 | 319  | G | T | 33 | 4  | --     | --  |
|            | Ca(ICCV2/PI489777)SNP_19743 | 349  | T | C | 22 | 4  | --     | --  |
|            | Ca(ICCV2/PI489777)SNP_19744 | 370  | G | A | 37 | 4  | --     | --  |
|            | Ca(ICCV2/PI489777)SNP_19745 | 1288 | C | T | 64 | 8  | --     | --  |
|            | Ca(ICCV2/PI489777)SNP_19746 | 1300 | A | G | 63 | 7  | --     | --  |
|            | Ca(ICCV2/PI489777)SNP_19747 | 1450 | G | T | 32 | 9  | --     | --  |
| CakTC30018 | Ca(ICCV2/PI489777)SNP_19748 | 1404 | A | G | 36 | 20 | --     | --  |
|            | Ca(ICCV2/PI489777)SNP_19749 | 2045 | G | C | 28 | 10 | --     | --  |
| CakTC30517 | Ca(ICCV2/PI489777)SNP_19750 | 401  | T | A | 21 | 4  | --     | --  |
|            | Ca(ICCV2/PI489777)SNP_19751 | 713  | A | G | 24 | 4  | --     | --  |
|            | Ca(ICCV2/PI489777)SNP_19752 | 815  | C | T | 30 | 15 | --     | --  |
|            | Ca(ICCV2/PI489777)SNP_19753 | 920  | G | C | 24 | 15 | --     | --  |

|            |                            |      |   |   |    |     |    |      |
|------------|----------------------------|------|---|---|----|-----|----|------|
|            | Ca(ICC2/PI489777)SNP_19754 | 1004 | T | C | 22 | 15  | -- | --   |
| CakTC42814 | Ca(ICC2/PI489777)SNP_19755 | 206  | T | C | 4  | 4   | -- | --   |
|            | Ca(ICC2/PI489777)SNP_19756 | 1028 | C | T | 14 | 7   | -- | --   |
|            | Ca(ICC2/PI489777)SNP_19757 | 1156 | A | G | 14 | 12  | -- | --   |
|            | Ca(ICC2/PI489777)SNP_19758 | 1190 | T | C | 7  | 11  | -- | --   |
|            | Ca(ICC2/PI489777)SNP_19759 | 1241 | A | G | 8  | 11  | -- | --   |
|            | Ca(ICC2/PI489777)SNP_19760 | 1292 | G | T | 10 | 11  | -- | --   |
|            | Ca(ICC2/PI489777)SNP_19761 | 1707 | G | T | 6  | 3   | -- | --   |
| CakTC13081 | Ca(ICC2/PI489777)SNP_19762 | 870  | T | C | 6  | 4   | -- | --   |
|            | Ca(ICC2/PI489777)SNP_19763 | 1820 | C | G | 11 | 6   | -- | --   |
| CakTC42737 | Ca(ICC2/PI489777)SNP_19764 | 688  | G | T | 11 | 5   | -- | --   |
|            | Ca(ICC2/PI489777)SNP_19765 | 698  | C | T | 12 | 5   | -- | --   |
| CakTC42049 | Ca(ICC2/PI489777)SNP_19766 | 644  | C | T | 3  | 6   | -- | --   |
|            | Ca(ICC2/PI489777)SNP_19767 | 764  | G | A | 3  | 6   | -- | --   |
| CakTC23309 | Ca(ICC2/PI489777)SNP_19768 | 1343 | T | C | 5  | 4   | -- | --   |
|            | Ca(ICC2/PI489777)SNP_19769 | 1378 | G | T | 5  | 4   | -- | --   |
| CakTC33008 | Ca(ICC2/PI489777)SNP_19770 | 369  | T | G | 22 | 5   | -- | --   |
|            | Ca(ICC2/PI489777)SNP_19771 | 1190 | A | G | 5  | 5   | -- | --   |
|            | Ca(ICC2/PI489777)SNP_19772 | 1750 | T | C | 5  | 6   | -- | --   |
| CakTC28835 | Ca(ICC2/PI489777)SNP_19773 | 1080 | C | T | 6  | 3   | -- | TPR  |
| CakTC39146 | Ca(ICC2/PI489777)SNP_19774 | 33   | T | A | 9  | 7   | -- | --   |
|            | Ca(ICC2/PI489777)SNP_19775 | 87   | C | T | 13 | 8   | -- | --   |
|            | Ca(ICC2/PI489777)SNP_19776 | 201  | T | A | 17 | 9   | -- | --   |
|            | Ca(ICC2/PI489777)SNP_19777 | 506  | T | A | 22 | 7   | -- | --   |
|            | Ca(ICC2/PI489777)SNP_19778 | 618  | C | T | 28 | 7   | -- | --   |
|            | Ca(ICC2/PI489777)SNP_19779 | 691  | A | G | 26 | 6   | -- | --   |
|            | Ca(ICC2/PI489777)SNP_19780 | 735  | T | G | 22 | 6   | -- | --   |
|            | Ca(ICC2/PI489777)SNP_19781 | 915  | G | T | 18 | 14  | -- | --   |
|            | Ca(ICC2/PI489777)SNP_19782 | 923  | C | A | 19 | 16  | -- | --   |
|            | Ca(ICC2/PI489777)SNP_19783 | 1046 | A | G | 11 | 12  | -- | --   |
|            | Ca(ICC2/PI489777)SNP_19784 | 1178 | T | C | 9  | 9   | -- | --   |
|            | Ca(ICC2/PI489777)SNP_19785 | 1224 | G | A | 12 | 6   | -- | --   |
| CakTC09105 | Ca(ICC2/PI489777)SNP_19786 | 597  | A | G | 6  | 3   | -- | --   |
|            | Ca(ICC2/PI489777)SNP_19787 | 3216 | C | T | 4  | 5   | -- | --   |
|            | Ca(ICC2/PI489777)SNP_19788 | 4515 | A | T | 4  | 8   | -- | --   |
|            | Ca(ICC2/PI489777)SNP_19789 | 5262 | T | C | 4  | 6   | -- | --   |
| CakTC26851 | Ca(ICC2/PI489777)SNP_19790 | 2274 | T | G | 7  | 3   | -- | --   |
|            | Ca(ICC2/PI489777)SNP_19791 | 2653 | A | G | 5  | 5   | -- | --   |
| CakTC33419 | Ca(ICC2/PI489777)SNP_19792 | 260  | T | C | 4  | 5   | -- | bZIP |
|            | Ca(ICC2/PI489777)SNP_19793 | 636  | C | T | 3  | 3   | -- | bZIP |
|            | Ca(ICC2/PI489777)SNP_19794 | 756  | A | G | 3  | 3   | -- | bZIP |
| CakTC38370 | Ca(ICC2/PI489777)SNP_19795 | 734  | A | G | 21 | 40  | -- | BSD  |
|            | Ca(ICC2/PI489777)SNP_19796 | 1286 | C | T | 19 | 14  | -- | BSD  |
|            | Ca(ICC2/PI489777)SNP_19797 | 1307 | A | G | 16 | 17  | -- | BSD  |
|            | Ca(ICC2/PI489777)SNP_19798 | 1339 | A | G | 16 | 16  | -- | BSD  |
|            | Ca(ICC2/PI489777)SNP_19799 | 1729 | C | G | 10 | 9   | -- | BSD  |
| CakTC40835 | Ca(ICC2/PI489777)SNP_19800 | 1645 | A | G | 17 | 3   | -- | --   |
|            | Ca(ICC2/PI489777)SNP_19801 | 1666 | T | A | 15 | 3   | -- | --   |
|            | Ca(ICC2/PI489777)SNP_19802 | 1667 | A | G | 15 | 3   | -- | --   |
| CakTC29147 | Ca(ICC2/PI489777)SNP_19803 | 1667 | A | T | 10 | 9   | -- | --   |
|            | Ca(ICC2/PI489777)SNP_19804 | 1672 | T | A | 8  | 9   | -- | --   |
|            | Ca(ICC2/PI489777)SNP_19805 | 1715 | A | G | 10 | 6   | -- | --   |
|            | Ca(ICC2/PI489777)SNP_19806 | 1719 | A | T | 10 | 7   | -- | --   |
|            | Ca(ICC2/PI489777)SNP_19807 | 1770 | C | T | 8  | 8   | -- | --   |
|            | Ca(ICC2/PI489777)SNP_19808 | 1794 | A | G | 9  | 7   | -- | --   |
|            | Ca(ICC2/PI489777)SNP_19809 | 2044 | G | T | 4  | 4   | -- | --   |
| CakTC34264 | Ca(ICC2/PI489777)SNP_19810 | 86   | T | C | 8  | 54  | -- | --   |
|            | Ca(ICC2/PI489777)SNP_19811 | 386  | T | C | 4  | 44  | -- | --   |
|            | Ca(ICC2/PI489777)SNP_19812 | 471  | G | C | 3  | 43  | -- | --   |
| CakTC37158 | Ca(ICC2/PI489777)SNP_19813 | 729  | G | A | 13 | 10  | -- | --   |
|            | Ca(ICC2/PI489777)SNP_19814 | 789  | C | T | 18 | 10  | -- | --   |
|            | Ca(ICC2/PI489777)SNP_19815 | 792  | C | G | 18 | 10  | -- | --   |
|            | Ca(ICC2/PI489777)SNP_19816 | 813  | C | T | 20 | 9   | -- | --   |
| CakTC31162 | Ca(ICC2/PI489777)SNP_19817 | 264  | G | A | 42 | 27  | -- | --   |
|            | Ca(ICC2/PI489777)SNP_19818 | 267  | T | C | 43 | 29  | -- | --   |
|            | Ca(ICC2/PI489777)SNP_19819 | 1080 | C | G | 41 | 57  | -- | --   |
|            | Ca(ICC2/PI489777)SNP_19820 | 1176 | T | C | 65 | 56  | -- | --   |
|            | Ca(ICC2/PI489777)SNP_19821 | 1308 | T | C | 99 | 102 | -- | --   |
|            | Ca(ICC2/PI489777)SNP_19822 | 2065 | T | C | 12 | 14  | -- | --   |
| CakTC40744 | Ca(ICC2/PI489777)SNP_19823 | 79   | G | A | 10 | 3   | -- | --   |
|            | Ca(ICC2/PI489777)SNP_19824 | 83   | T | C | 10 | 3   | -- | --   |
|            | Ca(ICC2/PI489777)SNP_19825 | 103  | G | A | 9  | 4   | -- | --   |
| CakTC36005 | Ca(ICC2/PI489777)SNP_19826 | 1312 | T | A | 6  | 6   | -- | --   |
| CakTC14903 | Ca(ICC2/PI489777)SNP_19827 | 334  | A | C | 3  | 3   | -- | --   |

|            |                            |      |   |   |     |    |    |     |
|------------|----------------------------|------|---|---|-----|----|----|-----|
| CakTC31928 | Ca(ICC2/PI489777)SNP_19828 | 422  | T | C | 3   | 4  | -- | --  |
|            | Ca(ICC2/PI489777)SNP_19829 | 1125 | T | G | 3   | 3  | -- | --  |
|            | Ca(ICC2/PI489777)SNP_19830 | 1319 | T | C | 4   | 6  | -- | --  |
|            | Ca(ICC2/PI489777)SNP_19831 | 1547 | A | G | 4   | 5  | -- | --  |
| CakTC41284 | Ca(ICC2/PI489777)SNP_19832 | 746  | G | T | 22  | 16 | -- | --  |
|            | Ca(ICC2/PI489777)SNP_19833 | 1637 | C | G | 11  | 21 | -- | --  |
|            | Ca(ICC2/PI489777)SNP_19834 | 1688 | G | A | 12  | 18 | -- | --  |
|            | Ca(ICC2/PI489777)SNP_19835 | 1813 | C | T | 16  | 23 | -- | --  |
|            | Ca(ICC2/PI489777)SNP_19836 | 2369 | T | A | 22  | 13 | -- | --  |
|            | Ca(ICC2/PI489777)SNP_19837 | 2423 | T | C | 12  | 9  | -- | --  |
| CakTC28259 | Ca(ICC2/PI489777)SNP_19838 | 109  | C | T | 3   | 4  | -- | --  |
|            | Ca(ICC2/PI489777)SNP_19839 | 161  | T | C | 22  | 17 | -- | --  |
|            | Ca(ICC2/PI489777)SNP_19840 | 163  | C | G | 21  | 17 | -- | --  |
|            | Ca(ICC2/PI489777)SNP_19841 | 1504 | T | C | 23  | 21 | -- | --  |
| CakTC40791 | Ca(ICC2/PI489777)SNP_19842 | 696  | C | T | 14  | 6  | -- | --  |
|            | Ca(ICC2/PI489777)SNP_19843 | 702  | C | T | 14  | 5  | -- | --  |
| CakTC26926 | Ca(ICC2/PI489777)SNP_19844 | 39   | A | G | 9   | 5  | -- | TPR |
|            | Ca(ICC2/PI489777)SNP_19845 | 117  | C | T | 18  | 9  | -- | TPR |
|            | Ca(ICC2/PI489777)SNP_19846 | 199  | T | G | 20  | 11 | -- | TPR |
|            | Ca(ICC2/PI489777)SNP_19847 | 404  | T | C | 15  | 11 | -- | TPR |
| CakTC22885 | Ca(ICC2/PI489777)SNP_19848 | 101  | T | C | 57  | 11 | -- | --  |
|            | Ca(ICC2/PI489777)SNP_19849 | 437  | A | C | 153 | 78 | -- | --  |
| CakTC37947 | Ca(ICC2/PI489777)SNP_19850 | 629  | G | A | 5   | 7  | -- | --  |
|            | Ca(ICC2/PI489777)SNP_19851 | 645  | G | A | 4   | 7  | -- | --  |
|            | Ca(ICC2/PI489777)SNP_19852 | 941  | A | G | 5   | 10 | -- | --  |
| CakTC27711 | Ca(ICC2/PI489777)SNP_19853 | 408  | G | A | 21  | 6  | -- | --  |
|            | Ca(ICC2/PI489777)SNP_19854 | 527  | C | T | 34  | 8  | -- | --  |
|            | Ca(ICC2/PI489777)SNP_19855 | 738  | G | A | 34  | 7  | -- | --  |
|            | Ca(ICC2/PI489777)SNP_19856 | 877  | T | G | 9   | 3  | -- | --  |
| CakTC29927 | Ca(ICC2/PI489777)SNP_19857 | 2097 | C | T | 11  | 10 | -- | --  |
| CakTC38248 | Ca(ICC2/PI489777)SNP_19858 | 114  | C | T | 8   | 9  | -- | --  |
|            | Ca(ICC2/PI489777)SNP_19859 | 421  | T | G | 5   | 9  | -- | --  |
|            | Ca(ICC2/PI489777)SNP_19860 | 422  | T | C | 4   | 9  | -- | --  |
|            | Ca(ICC2/PI489777)SNP_19861 | 490  | C | T | 7   | 5  | -- | --  |
|            | Ca(ICC2/PI489777)SNP_19862 | 908  | T | G | 12  | 5  | -- | --  |
|            | Ca(ICC2/PI489777)SNP_19863 | 943  | A | G | 10  | 4  | -- | --  |
| CakTC26670 | Ca(ICC2/PI489777)SNP_19864 | 97   | C | G | 7   | 3  | -- | --  |
|            | Ca(ICC2/PI489777)SNP_19865 | 132  | G | A | 7   | 3  | -- | --  |
| CakTC36711 | Ca(ICC2/PI489777)SNP_19866 | 82   | C | T | 8   | 8  | -- | --  |
|            | Ca(ICC2/PI489777)SNP_19867 | 84   | A | G | 8   | 8  | -- | --  |
|            | Ca(ICC2/PI489777)SNP_19868 | 675  | A | G | 6   | 7  | -- | --  |
|            | Ca(ICC2/PI489777)SNP_19869 | 684  | T | C | 7   | 7  | -- | --  |
|            | Ca(ICC2/PI489777)SNP_19870 | 771  | C | T | 3   | 6  | -- | --  |
|            | Ca(ICC2/PI489777)SNP_19871 | 924  | A | C | 6   | 10 | -- | --  |
|            | Ca(ICC2/PI489777)SNP_19872 | 1068 | C | A | 13  | 9  | -- | --  |
|            | Ca(ICC2/PI489777)SNP_19873 | 1128 | T | G | 11  | 10 | -- | --  |
|            | Ca(ICC2/PI489777)SNP_19874 | 1344 | A | G | 8   | 4  | -- | --  |
|            | Ca(ICC2/PI489777)SNP_19875 | 1500 | T | C | 8   | 7  | -- | --  |
|            | Ca(ICC2/PI489777)SNP_19876 | 1913 | A | G | 8   | 7  | -- | --  |
|            | Ca(ICC2/PI489777)SNP_19877 | 1922 | C | G | 10  | 6  | -- | --  |
|            | Ca(ICC2/PI489777)SNP_19878 | 2238 | C | T | 7   | 5  | -- | --  |
| CakTC10568 | Ca(ICC2/PI489777)SNP_19879 | 133  | A | G | 6   | 4  | -- | --  |
|            | Ca(ICC2/PI489777)SNP_19880 | 188  | C | T | 7   | 4  | -- | --  |
| CakTC25428 | Ca(ICC2/PI489777)SNP_19881 | 659  | A | G | 17  | 8  | -- | --  |
|            | Ca(ICC2/PI489777)SNP_19882 | 1069 | C | T | 14  | 4  | -- | --  |
| CakTC37556 | Ca(ICC2/PI489777)SNP_19883 | 953  | A | G | 11  | 11 | -- | --  |
|            | Ca(ICC2/PI489777)SNP_19884 | 1224 | G | C | 23  | 12 | -- | --  |
| CakTC11121 | Ca(ICC2/PI489777)SNP_19885 | 302  | T | C | 5   | 5  | -- | --  |
| CakTC22666 | Ca(ICC2/PI489777)SNP_19886 | 589  | A | C | 4   | 5  | -- | --  |
| CakTC41089 | Ca(ICC2/PI489777)SNP_19887 | 447  | T | C | 18  | 25 | -- | --  |
|            | Ca(ICC2/PI489777)SNP_19888 | 787  | C | G | 23  | 18 | -- | --  |
|            | Ca(ICC2/PI489777)SNP_19889 | 909  | C | T | 22  | 22 | -- | --  |
|            | Ca(ICC2/PI489777)SNP_19890 | 1344 | C | T | 33  | 31 | -- | --  |
|            | Ca(ICC2/PI489777)SNP_19891 | 1638 | C | T | 14  | 22 | -- | --  |
|            | Ca(ICC2/PI489777)SNP_19892 | 2177 | T | C | 20  | 19 | -- | --  |
|            | Ca(ICC2/PI489777)SNP_19893 | 2328 | C | T | 8   | 6  | -- | --  |
| CakTC37366 | Ca(ICC2/PI489777)SNP_19894 | 895  | A | G | 16  | 7  | -- | --  |
| CakTC07643 | Ca(ICC2/PI489777)SNP_19895 | 332  | A | G | 5   | 5  | -- | --  |
|            | Ca(ICC2/PI489777)SNP_19896 | 695  | A | G | 5   | 15 | -- | --  |
| CakTC26685 | Ca(ICC2/PI489777)SNP_19897 | 337  | A | G | 9   | 6  | -- | --  |
|            | Ca(ICC2/PI489777)SNP_19898 | 778  | C | A | 33  | 12 | -- | --  |
|            | Ca(ICC2/PI489777)SNP_19899 | 853  | T | C | 31  | 12 | -- | --  |
|            | Ca(ICC2/PI489777)SNP_19900 | 930  | C | G | 25  | 15 | -- | --  |
|            | Ca(ICC2/PI489777)SNP_19901 | 1105 | T | C | 26  | 14 | -- | --  |

|            |                            |      |   |   |    |    |        |      |
|------------|----------------------------|------|---|---|----|----|--------|------|
|            | Ca(ICC2/PI489777)SNP_19902 | 1110 | A | G | 23 | 12 | --     | --   |
| CakTC39311 | Ca(ICC2/PI489777)SNP_19903 | 541  | C | G | 26 | 8  | --     | --   |
|            | Ca(ICC2/PI489777)SNP_19904 | 573  | C | A | 28 | 6  | --     | --   |
|            | Ca(ICC2/PI489777)SNP_19905 | 1392 | T | G | 5  | 5  | --     | --   |
| CakTC28842 | Ca(ICC2/PI489777)SNP_19906 | 212  | G | A | 3  | 8  | --     | --   |
|            | Ca(ICC2/PI489777)SNP_19907 | 387  | T | C | 6  | 3  | --     | --   |
|            | Ca(ICC2/PI489777)SNP_19908 | 443  | A | G | 5  | 4  | --     | --   |
| CakTC42451 | Ca(ICC2/PI489777)SNP_19909 | 275  | A | C | 15 | 23 | --     | --   |
|            | Ca(ICC2/PI489777)SNP_19910 | 289  | T | A | 19 | 17 | --     | --   |
| CakTC17382 | Ca(ICC2/PI489777)SNP_19911 | 25   | T | C | 3  | 7  | --     | --   |
|            | Ca(ICC2/PI489777)SNP_19912 | 67   | C | T | 4  | 7  | --     | --   |
|            | Ca(ICC2/PI489777)SNP_19913 | 80   | G | A | 3  | 8  | --     | --   |
|            | Ca(ICC2/PI489777)SNP_19914 | 107  | A | G | 4  | 8  | --     | --   |
|            | Ca(ICC2/PI489777)SNP_19915 | 114  | C | T | 4  | 8  | --     | --   |
|            | Ca(ICC2/PI489777)SNP_19916 | 224  | G | C | 5  | 8  | --     | --   |
|            | Ca(ICC2/PI489777)SNP_19917 | 237  | T | C | 7  | 10 | --     | --   |
|            | Ca(ICC2/PI489777)SNP_19918 | 665  | T | C | 15 | 10 | --     | --   |
| CakTC39203 | Ca(ICC2/PI489777)SNP_19919 | 1185 | A | C | 11 | 10 | Mature | Leaf |
|            | Ca(ICC2/PI489777)SNP_19920 | 1260 | A | G | 17 | 11 | Mature | Leaf |
|            | Ca(ICC2/PI489777)SNP_19921 | 1265 | G | A | 18 | 9  | Mature | Leaf |
|            | Ca(ICC2/PI489777)SNP_19922 | 1425 | G | A | 16 | 6  | Mature | Leaf |
|            | Ca(ICC2/PI489777)SNP_19923 | 1446 | A | G | 14 | 6  | Mature | Leaf |
|            | Ca(ICC2/PI489777)SNP_19924 | 1464 | A | G | 15 | 6  | Mature | Leaf |
| CakTC27456 | Ca(ICC2/PI489777)SNP_19925 | 208  | C | A | 12 | 5  | --     | --   |
|            | Ca(ICC2/PI489777)SNP_19926 | 280  | G | C | 33 | 23 | --     | --   |
|            | Ca(ICC2/PI489777)SNP_19927 | 368  | C | T | 42 | 30 | --     | --   |
|            | Ca(ICC2/PI489777)SNP_19928 | 410  | G | C | 44 | 27 | --     | --   |
|            | Ca(ICC2/PI489777)SNP_19929 | 613  | T | A | 57 | 34 | --     | --   |
| CakTC02963 | Ca(ICC2/PI489777)SNP_19930 | 1580 | G | A | 7  | 9  | --     | --   |
|            | Ca(ICC2/PI489777)SNP_19931 | 1801 | G | A | 9  | 8  | --     | --   |
|            | Ca(ICC2/PI489777)SNP_19932 | 1816 | T | C | 9  | 4  | --     | --   |
| CakTC09202 | Ca(ICC2/PI489777)SNP_19933 | 1899 | T | G | 9  | 3  | --     | --   |
|            | Ca(ICC2/PI489777)SNP_19934 | 2353 | G | A | 5  | 3  | --     | --   |
| CakTC24887 | Ca(ICC2/PI489777)SNP_19935 | 469  | G | A | 6  | 4  | --     | --   |
|            | Ca(ICC2/PI489777)SNP_19936 | 480  | T | C | 8  | 6  | --     | --   |
|            | Ca(ICC2/PI489777)SNP_19937 | 819  | T | C | 10 | 3  | --     | --   |
|            | Ca(ICC2/PI489777)SNP_19938 | 1089 | A | C | 13 | 3  | --     | --   |
|            | Ca(ICC2/PI489777)SNP_19939 | 1254 | A | G | 15 | 8  | --     | --   |
|            | Ca(ICC2/PI489777)SNP_19940 | 2179 | A | C | 13 | 8  | --     | --   |
| CakTC14005 | Ca(ICC2/PI489777)SNP_19941 | 55   | T | G | 5  | 3  | --     | --   |
|            | Ca(ICC2/PI489777)SNP_19942 | 126  | C | T | 5  | 5  | --     | --   |
|            | Ca(ICC2/PI489777)SNP_19943 | 160  | C | T | 5  | 4  | --     | --   |
| CakTC24619 | Ca(ICC2/PI489777)SNP_19944 | 1167 | T | C | 9  | 6  | --     | --   |
|            | Ca(ICC2/PI489777)SNP_19945 | 1187 | A | T | 9  | 6  | --     | --   |
|            | Ca(ICC2/PI489777)SNP_19946 | 1593 | A | G | 4  | 6  | --     | --   |
|            | Ca(ICC2/PI489777)SNP_19947 | 1753 | T | C | 3  | 6  | --     | --   |
|            | Ca(ICC2/PI489777)SNP_19948 | 1872 | G | A | 8  | 7  | --     | --   |
|            | Ca(ICC2/PI489777)SNP_19949 | 2328 | C | G | 9  | 6  | --     | --   |
|            | Ca(ICC2/PI489777)SNP_19950 | 3756 | A | C | 3  | 5  | --     | --   |
|            | Ca(ICC2/PI489777)SNP_19951 | 4024 | C | T | 10 | 3  | --     | --   |
| CakTC33557 | Ca(ICC2/PI489777)SNP_19952 | 423  | C | T | 17 | 46 | --     | --   |
|            | Ca(ICC2/PI489777)SNP_19953 | 454  | C | T | 16 | 43 | --     | --   |
|            | Ca(ICC2/PI489777)SNP_19954 | 526  | C | T | 11 | 11 | --     | --   |
| CakTC30422 | Ca(ICC2/PI489777)SNP_19955 | 895  | G | A | 8  | 3  | --     | --   |
|            | Ca(ICC2/PI489777)SNP_19956 | 1053 | C | T | 12 | 3  | --     | --   |
|            | Ca(ICC2/PI489777)SNP_19957 | 1835 | G | A | 7  | 3  | --     | --   |
|            | Ca(ICC2/PI489777)SNP_19958 | 1919 | G | A | 8  | 4  | --     | --   |
| CakTC22485 | Ca(ICC2/PI489777)SNP_19959 | 1413 | C | T | 7  | 5  | --     | --   |
| CakTC26606 | Ca(ICC2/PI489777)SNP_19960 | 147  | T | G | 8  | 5  | --     | --   |
|            | Ca(ICC2/PI489777)SNP_19961 | 262  | C | T | 22 | 8  | --     | --   |
|            | Ca(ICC2/PI489777)SNP_19962 | 302  | C | G | 24 | 8  | --     | --   |
|            | Ca(ICC2/PI489777)SNP_19963 | 404  | T | C | 28 | 10 | --     | --   |
|            | Ca(ICC2/PI489777)SNP_19964 | 2419 | C | T | 9  | 11 | --     | --   |
| CakTC41688 | Ca(ICC2/PI489777)SNP_19965 | 371  | A | G | 5  | 7  | Flower | bud  |
|            | Ca(ICC2/PI489777)SNP_19966 | 460  | A | T | 7  | 8  | Flower | bud  |
|            | Ca(ICC2/PI489777)SNP_19967 | 520  | A | C | 6  | 6  | Flower | bud  |
|            | Ca(ICC2/PI489777)SNP_19968 | 584  | G | A | 4  | 3  | Flower | bud  |
| CakTC40261 | Ca(ICC2/PI489777)SNP_19969 | 351  | G | A | 37 | 23 | --     | --   |
|            | Ca(ICC2/PI489777)SNP_19970 | 492  | A | G | 42 | 21 | --     | --   |
|            | Ca(ICC2/PI489777)SNP_19971 | 585  | G | A | 36 | 20 | --     | --   |
|            | Ca(ICC2/PI489777)SNP_19972 | 952  | C | G | 30 | 17 | --     | --   |
|            | Ca(ICC2/PI489777)SNP_19973 | 985  | G | A | 21 | 10 | --     | --   |
|            | Ca(ICC2/PI489777)SNP_19974 | 1180 | C | T | 16 | 9  | --     | --   |
|            | Ca(ICC2/PI489777)SNP_19975 | 1399 | C | T | 20 | 14 | --     | --   |

|            |                            |      |   |   |    |    |           |      |
|------------|----------------------------|------|---|---|----|----|-----------|------|
|            | Ca(ICC2/PI489777)SNP_19976 | 1930 | C | T | 17 | 14 | --        | --   |
|            | Ca(ICC2/PI489777)SNP_19977 | 2098 | A | G | 22 | 10 | --        | --   |
|            | Ca(ICC2/PI489777)SNP_19978 | 2407 | T | C | 29 | 13 | --        | --   |
| CakTC26771 | Ca(ICC2/PI489777)SNP_19979 | 427  | A | C | 3  | 3  | --        | --   |
| CakTC30657 | Ca(ICC2/PI489777)SNP_19980 | 1396 | A | C | 3  | 5  | --        | --   |
| CakTC34518 | Ca(ICC2/PI489777)SNP_19981 | 522  | C | T | 4  | 7  | --        | --   |
|            | Ca(ICC2/PI489777)SNP_19982 | 579  | A | G | 4  | 7  | --        | --   |
| CakTC36201 | Ca(ICC2/PI489777)SNP_19983 | 220  | T | A | 8  | 7  | --        | --   |
|            | Ca(ICC2/PI489777)SNP_19984 | 750  | G | A | 17 | 6  | --        | --   |
|            | Ca(ICC2/PI489777)SNP_19985 | 1212 | G | A | 41 | 20 | --        | --   |
|            | Ca(ICC2/PI489777)SNP_19986 | 1215 | A | G | 40 | 19 | --        | --   |
|            | Ca(ICC2/PI489777)SNP_19987 | 1350 | T | G | 18 | 14 | --        | --   |
|            | Ca(ICC2/PI489777)SNP_19988 | 1407 | T | C | 5  | 9  | --        | --   |
|            | Ca(ICC2/PI489777)SNP_19989 | 1872 | G | A | 38 | 9  | --        | --   |
| CakTC25312 | Ca(ICC2/PI489777)SNP_19990 | 249  | C | T | 16 | 3  | --        | IWS1 |
| CakTC32144 | Ca(ICC2/PI489777)SNP_19991 | 696  | A | G | 8  | 5  | --        | --   |
|            | Ca(ICC2/PI489777)SNP_19992 | 1418 | C | G | 3  | 8  | --        | --   |
| CakTC39633 | Ca(ICC2/PI489777)SNP_19993 | 136  | C | A | 8  | 12 | --        | --   |
|            | Ca(ICC2/PI489777)SNP_19994 | 179  | T | G | 11 | 15 | --        | --   |
| CakTC39636 | Ca(ICC2/PI489777)SNP_19995 | 576  | A | T | 14 | 10 | --        | --   |
|            | Ca(ICC2/PI489777)SNP_19996 | 675  | C | T | 14 | 14 | --        | --   |
|            | Ca(ICC2/PI489777)SNP_19997 | 690  | C | T | 16 | 8  | --        | --   |
|            | Ca(ICC2/PI489777)SNP_19998 | 768  | G | A | 23 | 23 | --        | --   |
|            | Ca(ICC2/PI489777)SNP_19999 | 801  | A | G | 24 | 28 | --        | --   |
|            | Ca(ICC2/PI489777)SNP_20000 | 840  | C | G | 25 | 28 | --        | --   |
| CakTC24405 | Ca(ICC2/PI489777)SNP_20001 | 872  | G | A | 39 | 14 | --        | --   |
| CakTC20165 | Ca(ICC2/PI489777)SNP_20002 | 1277 | A | G | 11 | 5  | Young_pod | --   |
| CakTC41853 | Ca(ICC2/PI489777)SNP_20003 | 62   | T | C | 12 | 11 | --        | --   |
|            | Ca(ICC2/PI489777)SNP_20004 | 91   | C | T | 14 | 12 | --        | --   |
|            | Ca(ICC2/PI489777)SNP_20005 | 509  | T | C | 6  | 13 | --        | --   |
|            | Ca(ICC2/PI489777)SNP_20006 | 673  | G | C | 9  | 9  | --        | --   |
|            | Ca(ICC2/PI489777)SNP_20007 | 742  | G | T | 9  | 8  | --        | --   |
|            | Ca(ICC2/PI489777)SNP_20008 | 743  | G | A | 9  | 8  | --        | --   |
| CakTC03343 | Ca(ICC2/PI489777)SNP_20009 | 291  | C | T | 13 | 11 | --        | --   |
|            | Ca(ICC2/PI489777)SNP_20010 | 588  | G | A | 3  | 5  | --        | --   |
|            | Ca(ICC2/PI489777)SNP_20011 | 606  | C | A | 3  | 3  | --        | --   |
| CakTC23480 | Ca(ICC2/PI489777)SNP_20012 | 2677 | T | G | 6  | 13 | --        | --   |
| CakTC35095 | Ca(ICC2/PI489777)SNP_20013 | 1110 | C | T | 4  | 13 | --        | --   |
|            | Ca(ICC2/PI489777)SNP_20014 | 1284 | A | G | 6  | 14 | --        | --   |
|            | Ca(ICC2/PI489777)SNP_20015 | 1326 | G | C | 7  | 13 | --        | --   |
| CakTC38476 | Ca(ICC2/PI489777)SNP_20016 | 907  | C | T | 5  | 10 | Root      | --   |
| CakTC29743 | Ca(ICC2/PI489777)SNP_20017 | 935  | T | C | 5  | 7  | --        | --   |
|            | Ca(ICC2/PI489777)SNP_20018 | 1188 | T | C | 3  | 5  | --        | --   |
| CakTC02562 | Ca(ICC2/PI489777)SNP_20019 | 206  | T | G | 8  | 8  | --        | --   |
|            | Ca(ICC2/PI489777)SNP_20020 | 1293 | A | G | 8  | 8  | --        | --   |
|            | Ca(ICC2/PI489777)SNP_20021 | 1450 | T | C | 9  | 7  | --        | --   |
|            | Ca(ICC2/PI489777)SNP_20022 | 1470 | T | A | 11 | 9  | --        | --   |
|            | Ca(ICC2/PI489777)SNP_20023 | 1915 | C | T | 10 | 3  | --        | --   |
|            | Ca(ICC2/PI489777)SNP_20024 | 2004 | G | A | 17 | 3  | --        | --   |
|            | Ca(ICC2/PI489777)SNP_20025 | 2799 | C | T | 11 | 3  | --        | --   |
|            | Ca(ICC2/PI489777)SNP_20026 | 3225 | G | T | 14 | 8  | --        | --   |
|            | Ca(ICC2/PI489777)SNP_20027 | 3273 | G | A | 15 | 9  | --        | --   |
| CakTC42415 | Ca(ICC2/PI489777)SNP_20028 | 779  | G | C | 13 | 6  | --        | --   |
| CakTC38851 | Ca(ICC2/PI489777)SNP_20029 | 1989 | C | T | 3  | 3  | --        | --   |
| CakTC25168 | Ca(ICC2/PI489777)SNP_20030 | 95   | C | T | 62 | 33 | --        | --   |
|            | Ca(ICC2/PI489777)SNP_20031 | 180  | G | A | 76 | 38 | --        | --   |
|            | Ca(ICC2/PI489777)SNP_20032 | 199  | C | A | 54 | 35 | --        | --   |
|            | Ca(ICC2/PI489777)SNP_20033 | 605  | C | T | 86 | 39 | --        | --   |
|            | Ca(ICC2/PI489777)SNP_20034 | 646  | A | G | 88 | 37 | --        | --   |
|            | Ca(ICC2/PI489777)SNP_20035 | 775  | A | C | 64 | 20 | --        | --   |
| CakTC05322 | Ca(ICC2/PI489777)SNP_20036 | 334  | T | G | 5  | 5  | --        | --   |
|            | Ca(ICC2/PI489777)SNP_20037 | 1129 | C | T | 5  | 3  | --        | --   |
|            | Ca(ICC2/PI489777)SNP_20038 | 1958 | A | T | 3  | 6  | --        | --   |
|            | Ca(ICC2/PI489777)SNP_20039 | 2163 | C | T | 3  | 5  | --        | --   |
| CakTC32625 | Ca(ICC2/PI489777)SNP_20040 | 1135 | A | C | 16 | 8  | --        | --   |
|            | Ca(ICC2/PI489777)SNP_20041 | 1281 | C | T | 21 | 11 | --        | --   |
|            | Ca(ICC2/PI489777)SNP_20042 | 1293 | T | C | 22 | 11 | --        | --   |
|            | Ca(ICC2/PI489777)SNP_20043 | 1567 | C | T | 16 | 4  | --        | --   |
|            | Ca(ICC2/PI489777)SNP_20044 | 1610 | G | C | 15 | 3  | --        | --   |
|            | Ca(ICC2/PI489777)SNP_20045 | 1612 | G | A | 10 | 3  | --        | --   |
|            | Ca(ICC2/PI489777)SNP_20046 | 1626 | C | T | 10 | 3  | --        | --   |
|            | Ca(ICC2/PI489777)SNP_20047 | 1629 | G | C | 10 | 3  | --        | --   |
| CakTC42092 | Ca(ICC2/PI489777)SNP_20048 | 540  | T | C | 30 | 28 | Flower    | bud  |
|            | Ca(ICC2/PI489777)SNP_20049 | 615  | G | A | 29 | 29 | Flower    | bud  |

|            |                            |      |   |   |    |    |        |     |
|------------|----------------------------|------|---|---|----|----|--------|-----|
|            | Ca(ICC2/PI489777)SNP_20050 | 643  | A | G | 31 | 30 | Flower | bud |
|            | Ca(ICC2/PI489777)SNP_20051 | 651  | T | A | 30 | 23 | Flower | bud |
| CakTC26584 | Ca(ICC2/PI489777)SNP_20052 | 199  | A | C | 59 | 14 | --     | --  |
|            | Ca(ICC2/PI489777)SNP_20053 | 492  | G | C | 93 | 16 | --     | --  |
|            | Ca(ICC2/PI489777)SNP_20054 | 503  | G | A | 77 | 18 | --     | --  |
|            | Ca(ICC2/PI489777)SNP_20055 | 1085 | T | C | 50 | 18 | --     | --  |
|            | Ca(ICC2/PI489777)SNP_20056 | 1102 | T | A | 52 | 17 | --     | --  |
|            | Ca(ICC2/PI489777)SNP_20057 | 1121 | C | A | 51 | 17 | --     | --  |
|            | Ca(ICC2/PI489777)SNP_20058 | 1179 | C | G | 49 | 17 | --     | --  |
|            | Ca(ICC2/PI489777)SNP_20059 | 1199 | C | G | 45 | 16 | --     | --  |
| CakTC37186 | Ca(ICC2/PI489777)SNP_20060 | 568  | T | C | 12 | 7  | --     | --  |
|            | Ca(ICC2/PI489777)SNP_20061 | 1119 | A | T | 11 | 7  | --     | --  |
|            | Ca(ICC2/PI489777)SNP_20062 | 1269 | G | C | 9  | 9  | --     | --  |
|            | Ca(ICC2/PI489777)SNP_20063 | 1339 | T | A | 8  | 9  | --     | --  |
| CakTC27391 | Ca(ICC2/PI489777)SNP_20064 | 476  | T | C | 15 | 32 | --     | --  |
|            | Ca(ICC2/PI489777)SNP_20065 | 549  | A | G | 18 | 29 | --     | --  |
|            | Ca(ICC2/PI489777)SNP_20066 | 1761 | A | G | 28 | 15 | --     | --  |
|            | Ca(ICC2/PI489777)SNP_20067 | 1782 | G | C | 28 | 12 | --     | --  |
| CakTC28803 | Ca(ICC2/PI489777)SNP_20068 | 575  | A | G | 3  | 5  | --     | --  |
| CakTC33374 | Ca(ICC2/PI489777)SNP_20069 | 130  | G | A | 7  | 3  | --     | --  |
|            | Ca(ICC2/PI489777)SNP_20070 | 148  | G | T | 7  | 3  | --     | --  |
| CakTC31506 | Ca(ICC2/PI489777)SNP_20071 | 227  | G | A | 9  | 3  | --     | --  |
| CakTC38449 | Ca(ICC2/PI489777)SNP_20072 | 1155 | A | T | 3  | 4  | --     | --  |
|            | Ca(ICC2/PI489777)SNP_20073 | 1347 | T | C | 7  | 8  | --     | --  |
|            | Ca(ICC2/PI489777)SNP_20074 | 1397 | T | C | 8  | 7  | --     | --  |
| CakTC18104 | Ca(ICC2/PI489777)SNP_20075 | 456  | A | G | 12 | 4  | --     | --  |
|            | Ca(ICC2/PI489777)SNP_20076 | 1135 | T | A | 6  | 10 | --     | --  |
|            | Ca(ICC2/PI489777)SNP_20077 | 1466 | G | T | 4  | 10 | --     | --  |
| CakTC42186 | Ca(ICC2/PI489777)SNP_20078 | 144  | C | T | 3  | 4  | --     | --  |
|            | Ca(ICC2/PI489777)SNP_20079 | 273  | A | G | 4  | 8  | --     | --  |
| CakTC41988 | Ca(ICC2/PI489777)SNP_20080 | 92   | G | C | 11 | 5  | --     | --  |
|            | Ca(ICC2/PI489777)SNP_20081 | 401  | G | A | 31 | 21 | --     | --  |
|            | Ca(ICC2/PI489777)SNP_20082 | 617  | A | C | 22 | 17 | --     | --  |
| CakTC29233 | Ca(ICC2/PI489777)SNP_20083 | 73   | C | T | 4  | 5  | --     | --  |
|            | Ca(ICC2/PI489777)SNP_20084 | 154  | C | T | 3  | 4  | --     | --  |
|            | Ca(ICC2/PI489777)SNP_20085 | 229  | A | G | 5  | 9  | --     | --  |
|            | Ca(ICC2/PI489777)SNP_20086 | 397  | G | C | 3  | 6  | --     | --  |
|            | Ca(ICC2/PI489777)SNP_20087 | 837  | T | A | 6  | 3  | --     | --  |
|            | Ca(ICC2/PI489777)SNP_20088 | 855  | A | G | 6  | 3  | --     | --  |
| CakTC11507 | Ca(ICC2/PI489777)SNP_20089 | 164  | T | A | 9  | 10 | --     | --  |
|            | Ca(ICC2/PI489777)SNP_20090 | 215  | C | T | 11 | 13 | --     | --  |
|            | Ca(ICC2/PI489777)SNP_20091 | 222  | A | G | 11 | 12 | --     | --  |
|            | Ca(ICC2/PI489777)SNP_20092 | 225  | T | C | 10 | 11 | --     | --  |
|            | Ca(ICC2/PI489777)SNP_20093 | 238  | A | G | 11 | 14 | --     | --  |
|            | Ca(ICC2/PI489777)SNP_20094 | 251  | G | C | 11 | 14 | --     | --  |
|            | Ca(ICC2/PI489777)SNP_20095 | 294  | C | T | 13 | 13 | --     | --  |
| CakTC33671 | Ca(ICC2/PI489777)SNP_20096 | 392  | T | C | 8  | 6  | --     | --  |
| CakTC39786 | Ca(ICC2/PI489777)SNP_20097 | 193  | T | C | 19 | 6  | --     | --  |
|            | Ca(ICC2/PI489777)SNP_20098 | 583  | A | T | 18 | 3  | --     | --  |
|            | Ca(ICC2/PI489777)SNP_20099 | 637  | G | C | 18 | 3  | --     | --  |
|            | Ca(ICC2/PI489777)SNP_20100 | 760  | C | T | 23 | 3  | --     | --  |
|            | Ca(ICC2/PI489777)SNP_20101 | 1119 | T | C | 24 | 24 | --     | --  |
| CakTC41654 | Ca(ICC2/PI489777)SNP_20102 | 220  | A | T | 34 | 10 | --     | --  |
|            | Ca(ICC2/PI489777)SNP_20103 | 222  | T | G | 34 | 10 | --     | --  |
|            | Ca(ICC2/PI489777)SNP_20104 | 305  | T | G | 37 | 9  | --     | --  |
|            | Ca(ICC2/PI489777)SNP_20105 | 317  | C | G | 35 | 9  | --     | --  |
|            | Ca(ICC2/PI489777)SNP_20106 | 484  | C | A | 29 | 5  | --     | --  |
|            | Ca(ICC2/PI489777)SNP_20107 | 504  | C | A | 24 | 5  | --     | --  |
| CakTC39543 | Ca(ICC2/PI489777)SNP_20108 | 178  | C | T | 18 | 16 | --     | --  |
|            | Ca(ICC2/PI489777)SNP_20109 | 280  | C | T | 14 | 16 | --     | --  |
|            | Ca(ICC2/PI489777)SNP_20110 | 454  | T | C | 19 | 10 | --     | --  |
|            | Ca(ICC2/PI489777)SNP_20111 | 571  | T | C | 25 | 3  | --     | --  |
|            | Ca(ICC2/PI489777)SNP_20112 | 901  | A | G | 19 | 10 | --     | --  |
| CakTC01310 | Ca(ICC2/PI489777)SNP_20113 | 630  | G | A | 5  | 3  | --     | --  |
| CakTC10727 | Ca(ICC2/PI489777)SNP_20114 | 1050 | C | T | 4  | 5  | --     | --  |
|            | Ca(ICC2/PI489777)SNP_20115 | 1134 | T | C | 4  | 3  | --     | --  |
|            | Ca(ICC2/PI489777)SNP_20116 | 1879 | A | T | 5  | 6  | --     | --  |
|            | Ca(ICC2/PI489777)SNP_20117 | 2381 | A | G | 3  | 3  | --     | --  |
| CakTC24791 | Ca(ICC2/PI489777)SNP_20118 | 505  | T | C | 14 | 11 | Flower | bud |
|            | Ca(ICC2/PI489777)SNP_20119 | 910  | A | G | 18 | 16 | Flower | bud |
|            | Ca(ICC2/PI489777)SNP_20120 | 1009 | C | T | 19 | 16 | Flower | bud |
|            | Ca(ICC2/PI489777)SNP_20121 | 1603 | T | A | 4  | 6  | Flower | bud |
| CakTC29216 | Ca(ICC2/PI489777)SNP_20122 | 210  | T | G | 6  | 3  | --     | --  |
|            | Ca(ICC2/PI489777)SNP_20123 | 250  | G | A | 6  | 3  | --     | --  |



|            |                             |      |   |   |    |    |    |              |
|------------|-----------------------------|------|---|---|----|----|----|--------------|
| CakTC34481 | Ca(ICCV2/PI489777)SNP_20124 | 1290 | A | T | 6  | 8  | -- | --           |
|            | Ca(ICCV2/PI489777)SNP_20125 | 1808 | C | G | 12 | 5  | -- | --           |
| CakTC37594 | Ca(ICCV2/PI489777)SNP_20126 | 587  | A | G | 48 | 15 | -- | --           |
|            | Ca(ICCV2/PI489777)SNP_20127 | 640  | C | T | 51 | 9  | -- | --           |
| CakTC10252 | Ca(ICCV2/PI489777)SNP_20128 | 418  | T | C | 12 | 6  | -- | --           |
| CakTC40386 | Ca(ICCV2/PI489777)SNP_20129 | 922  | C | T | 7  | 6  | -- | WI/SNF-BAF60 |
|            | Ca(ICCV2/PI489777)SNP_20130 | 1099 | C | A | 7  | 7  | -- | WI/SNF-BAF60 |
| CakTC26453 | Ca(ICCV2/PI489777)SNP_20131 | 755  | T | G | 30 | 13 | -- | --           |
|            | Ca(ICCV2/PI489777)SNP_20132 | 1022 | T | C | 20 | 16 | -- | --           |
|            | Ca(ICCV2/PI489777)SNP_20133 | 1183 | A | C | 3  | 11 | -- | --           |
| CakTC33067 | Ca(ICCV2/PI489777)SNP_20134 | 369  | C | A | 5  | 6  | -- | --           |
|            | Ca(ICCV2/PI489777)SNP_20135 | 566  | A | G | 6  | 7  | -- | --           |
|            | Ca(ICCV2/PI489777)SNP_20136 | 719  | T | C | 8  | 3  | -- | --           |
|            | Ca(ICCV2/PI489777)SNP_20137 | 888  | T | G | 9  | 5  | -- | --           |
|            | Ca(ICCV2/PI489777)SNP_20138 | 1187 | C | T | 9  | 6  | -- | --           |
|            | Ca(ICCV2/PI489777)SNP_20139 | 1313 | A | C | 12 | 3  | -- | --           |
|            | Ca(ICCV2/PI489777)SNP_20140 | 1545 | C | T | 12 | 6  | -- | --           |
|            | Ca(ICCV2/PI489777)SNP_20141 | 1803 | G | T | 19 | 8  | -- | --           |
|            | Ca(ICCV2/PI489777)SNP_20142 | 2074 | C | T | 14 | 10 | -- | --           |
|            | Ca(ICCV2/PI489777)SNP_20143 | 2584 | G | A | 6  | 4  | -- | --           |
| CakTC34120 | Ca(ICCV2/PI489777)SNP_20144 | 396  | A | C | 3  | 4  | -- | --           |
|            | Ca(ICCV2/PI489777)SNP_20145 | 435  | A | T | 3  | 5  | -- | --           |
| CakTC29011 | Ca(ICCV2/PI489777)SNP_20146 | 1630 | A | T | 3  | 4  | -- | --           |
| CakTC29677 | Ca(ICCV2/PI489777)SNP_20147 | 616  | G | A | 28 | 15 | -- | --           |
|            | Ca(ICCV2/PI489777)SNP_20148 | 700  | A | G | 20 | 12 | -- | --           |
| CakTC42649 | Ca(ICCV2/PI489777)SNP_20149 | 160  | A | G | 7  | 4  | -- | --           |
|            | Ca(ICCV2/PI489777)SNP_20150 | 192  | C | T | 7  | 4  | -- | --           |
| CakTC11438 | Ca(ICCV2/PI489777)SNP_20151 | 878  | C | T | 6  | 7  | -- | --           |
|            | Ca(ICCV2/PI489777)SNP_20152 | 893  | T | C | 7  | 6  | -- | --           |
|            | Ca(ICCV2/PI489777)SNP_20153 | 1040 | T | C | 8  | 7  | -- | --           |
|            | Ca(ICCV2/PI489777)SNP_20154 | 1094 | A | G | 9  | 6  | -- | --           |
|            | Ca(ICCV2/PI489777)SNP_20155 | 1241 | A | G | 9  | 6  | -- | --           |
|            | Ca(ICCV2/PI489777)SNP_20156 | 1562 | C | T | 8  | 7  | -- | --           |
|            | Ca(ICCV2/PI489777)SNP_20157 | 1625 | C | T | 7  | 7  | -- | --           |
|            | Ca(ICCV2/PI489777)SNP_20158 | 1667 | C | G | 7  | 5  | -- | --           |
|            | Ca(ICCV2/PI489777)SNP_20159 | 1677 | G | A | 7  | 4  | -- | --           |
|            | Ca(ICCV2/PI489777)SNP_20160 | 1679 | A | T | 7  | 4  | -- | --           |
| CakTC34626 | Ca(ICCV2/PI489777)SNP_20161 | 66   | G | T | 7  | 3  | -- | --           |
|            | Ca(ICCV2/PI489777)SNP_20162 | 203  | T | C | 8  | 6  | -- | --           |
|            | Ca(ICCV2/PI489777)SNP_20163 | 242  | T | C | 10 | 7  | -- | --           |
|            | Ca(ICCV2/PI489777)SNP_20164 | 261  | T | A | 10 | 7  | -- | --           |
|            | Ca(ICCV2/PI489777)SNP_20165 | 263  | C | A | 10 | 7  | -- | --           |
|            | Ca(ICCV2/PI489777)SNP_20166 | 284  | T | C | 10 | 7  | -- | --           |
|            | Ca(ICCV2/PI489777)SNP_20167 | 1195 | T | C | 9  | 4  | -- | --           |
| CakTC37966 | Ca(ICCV2/PI489777)SNP_20168 | 394  | G | A | 10 | 8  | -- | --           |
|            | Ca(ICCV2/PI489777)SNP_20169 | 528  | T | C | 8  | 4  | -- | --           |
|            | Ca(ICCV2/PI489777)SNP_20170 | 576  | A | C | 6  | 5  | -- | --           |
|            | Ca(ICCV2/PI489777)SNP_20171 | 597  | G | C | 7  | 5  | -- | --           |
|            | Ca(ICCV2/PI489777)SNP_20172 | 1230 | T | C | 11 | 4  | -- | --           |
| CakTC27983 | Ca(ICCV2/PI489777)SNP_20173 | 277  | C | T | 12 | 19 | -- | --           |
|            | Ca(ICCV2/PI489777)SNP_20174 | 613  | A | G | 23 | 9  | -- | --           |
|            | Ca(ICCV2/PI489777)SNP_20175 | 676  | A | G | 21 | 9  | -- | --           |
|            | Ca(ICCV2/PI489777)SNP_20176 | 952  | T | A | 22 | 15 | -- | --           |
|            | Ca(ICCV2/PI489777)SNP_20177 | 2005 | T | C | 5  | 14 | -- | --           |
| CakTC38813 | Ca(ICCV2/PI489777)SNP_20178 | 168  | A | T | 9  | 7  | -- | --           |
|            | Ca(ICCV2/PI489777)SNP_20179 | 201  | C | A | 9  | 6  | -- | --           |
| CakTC24200 | Ca(ICCV2/PI489777)SNP_20180 | 1250 | G | A | 18 | 21 | -- | --           |
| CakTC42479 | Ca(ICCV2/PI489777)SNP_20181 | 1737 | G | A | 16 | 10 | -- | --           |
|            | Ca(ICCV2/PI489777)SNP_20182 | 1753 | T | G | 20 | 9  | -- | --           |
| CakTC41845 | Ca(ICCV2/PI489777)SNP_20183 | 85   | G | A | 22 | 5  | -- | --           |
| CakTC14932 | Ca(ICCV2/PI489777)SNP_20184 | 920  | A | C | 46 | 14 | -- | bHLH         |
|            | Ca(ICCV2/PI489777)SNP_20185 | 1070 | C | T | 56 | 12 | -- | bHLH         |
|            | Ca(ICCV2/PI489777)SNP_20186 | 1073 | T | C | 58 | 12 | -- | bHLH         |
| CakTC32187 | Ca(ICCV2/PI489777)SNP_20187 | 84   | G | A | 3  | 4  | -- | --           |
|            | Ca(ICCV2/PI489777)SNP_20188 | 255  | C | T | 4  | 4  | -- | --           |
| CakTC34545 | Ca(ICCV2/PI489777)SNP_20189 | 411  | A | G | 7  | 9  | -- | --           |
| CakTC39471 | Ca(ICCV2/PI489777)SNP_20190 | 683  | A | G | 31 | 6  | -- | --           |
| CakTC10078 | Ca(ICCV2/PI489777)SNP_20191 | 1354 | G | A | 6  | 5  | -- | bHLH         |
|            | Ca(ICCV2/PI489777)SNP_20192 | 1433 | T | G | 7  | 5  | -- | bHLH         |
| CakTC25801 | Ca(ICCV2/PI489777)SNP_20193 | 49   | T | C | 11 | 11 | -- | --           |
|            | Ca(ICCV2/PI489777)SNP_20194 | 62   | T | A | 11 | 11 | -- | --           |
|            | Ca(ICCV2/PI489777)SNP_20195 | 100  | C | T | 12 | 12 | -- | --           |
|            | Ca(ICCV2/PI489777)SNP_20196 | 102  | G | A | 13 | 12 | -- | --           |
|            | Ca(ICCV2/PI489777)SNP_20197 | 152  | T | C | 25 | 34 | -- | --           |

|            |                            |      |   |   |     |     |      |    |
|------------|----------------------------|------|---|---|-----|-----|------|----|
|            | Ca(ICC2/PI489777)SNP_20198 | 158  | C | A | 31  | 39  | --   | -- |
|            | Ca(ICC2/PI489777)SNP_20199 | 167  | A | G | 32  | 41  | --   | -- |
| CakTC41720 | Ca(ICC2/PI489777)SNP_20200 | 1786 | A | C | 4   | 3   | --   | -- |
| CakTC34150 | Ca(ICC2/PI489777)SNP_20201 | 446  | T | C | 14  | 21  | --   | -- |
|            | Ca(ICC2/PI489777)SNP_20202 | 462  | G | A | 14  | 21  | --   | -- |
|            | Ca(ICC2/PI489777)SNP_20203 | 545  | T | C | 13  | 19  | --   | -- |
| CakTC34796 | Ca(ICC2/PI489777)SNP_20204 | 922  | C | T | 23  | 35  | --   | -- |
|            | Ca(ICC2/PI489777)SNP_20205 | 3216 | A | C | 24  | 18  | --   | -- |
|            | Ca(ICC2/PI489777)SNP_20206 | 3247 | C | A | 21  | 18  | --   | -- |
| CakTC41367 | Ca(ICC2/PI489777)SNP_20207 | 755  | A | G | 8   | 4   | --   | -- |
|            | Ca(ICC2/PI489777)SNP_20208 | 1172 | C | A | 6   | 3   | --   | -- |
|            | Ca(ICC2/PI489777)SNP_20209 | 2243 | C | T | 13  | 6   | --   | -- |
| CakTC11366 | Ca(ICC2/PI489777)SNP_20210 | 1121 | T | C | 4   | 4   | --   | -- |
| CakTC30959 | Ca(ICC2/PI489777)SNP_20211 | 155  | G | A | 78  | 101 | --   | -- |
| CakTC41265 | Ca(ICC2/PI489777)SNP_20212 | 527  | T | A | 12  | 6   | --   | -- |
|            | Ca(ICC2/PI489777)SNP_20213 | 1418 | G | T | 6   | 7   | --   | -- |
|            | Ca(ICC2/PI489777)SNP_20214 | 1661 | T | A | 10  | 7   | --   | -- |
|            | Ca(ICC2/PI489777)SNP_20215 | 1811 | G | C | 10  | 4   | --   | -- |
| CakTC09624 | Ca(ICC2/PI489777)SNP_20216 | 607  | G | C | 5   | 3   | --   | -- |
| CakTC13074 | Ca(ICC2/PI489777)SNP_20217 | 314  | C | T | 6   | 3   | --   | -- |
| CakTC33361 | Ca(ICC2/PI489777)SNP_20218 | 1777 | C | G | 10  | 10  | --   | -- |
| CakTC38713 | Ca(ICC2/PI489777)SNP_20219 | 288  | A | T | 13  | 7   | --   | -- |
| CakTC42197 | Ca(ICC2/PI489777)SNP_20220 | 195  | G | C | 12  | 7   | --   | -- |
|            | Ca(ICC2/PI489777)SNP_20221 | 234  | T | A | 14  | 12  | --   | -- |
|            | Ca(ICC2/PI489777)SNP_20222 | 237  | A | T | 8   | 12  | --   | -- |
|            | Ca(ICC2/PI489777)SNP_20223 | 1049 | A | G | 23  | 15  | --   | -- |
| CakTC37665 | Ca(ICC2/PI489777)SNP_20224 | 177  | A | G | 11  | 6   | --   | -- |
|            | Ca(ICC2/PI489777)SNP_20225 | 559  | C | A | 18  | 13  | --   | -- |
|            | Ca(ICC2/PI489777)SNP_20226 | 816  | C | T | 20  | 6   | --   | -- |
|            | Ca(ICC2/PI489777)SNP_20227 | 1465 | G | A | 16  | 8   | --   | -- |
| CakTC37865 | Ca(ICC2/PI489777)SNP_20228 | 287  | C | A | 23  | 15  | --   | -- |
|            | Ca(ICC2/PI489777)SNP_20229 | 290  | T | A | 22  | 15  | --   | -- |
|            | Ca(ICC2/PI489777)SNP_20230 | 927  | A | G | 55  | 10  | --   | -- |
|            | Ca(ICC2/PI489777)SNP_20231 | 1178 | T | C | 21  | 23  | --   | -- |
| CakTC42085 | Ca(ICC2/PI489777)SNP_20232 | 380  | G | T | 11  | 4   | --   | -- |
|            | Ca(ICC2/PI489777)SNP_20233 | 1358 | A | G | 19  | 11  | --   | -- |
|            | Ca(ICC2/PI489777)SNP_20234 | 1490 | A | G | 21  | 6   | --   | -- |
|            | Ca(ICC2/PI489777)SNP_20235 | 1494 | A | G | 22  | 5   | --   | -- |
|            | Ca(ICC2/PI489777)SNP_20236 | 1646 | G | A | 14  | 4   | --   | -- |
|            | Ca(ICC2/PI489777)SNP_20237 | 1691 | G | A | 13  | 5   | --   | -- |
| CakTC31702 | Ca(ICC2/PI489777)SNP_20238 | 308  | C | G | 4   | 4   | --   | -- |
|            | Ca(ICC2/PI489777)SNP_20239 | 334  | C | T | 4   | 4   | --   | -- |
|            | Ca(ICC2/PI489777)SNP_20240 | 344  | A | G | 4   | 4   | --   | -- |
|            | Ca(ICC2/PI489777)SNP_20241 | 828  | G | A | 9   | 13  | --   | -- |
|            | Ca(ICC2/PI489777)SNP_20242 | 839  | C | T | 9   | 13  | --   | -- |
|            | Ca(ICC2/PI489777)SNP_20243 | 1037 | C | T | 10  | 9   | --   | -- |
|            | Ca(ICC2/PI489777)SNP_20244 | 1046 | A | C | 3   | 10  | --   | -- |
|            | Ca(ICC2/PI489777)SNP_20245 | 1206 | A | G | 9   | 3   | --   | -- |
|            | Ca(ICC2/PI489777)SNP_20246 | 1429 | A | G | 3   | 3   | --   | -- |
| CakTC29893 | Ca(ICC2/PI489777)SNP_20247 | 81   | G | C | 7   | 3   | --   | -- |
|            | Ca(ICC2/PI489777)SNP_20248 | 780  | G | A | 52  | 21  | --   | -- |
| CakTC09689 | Ca(ICC2/PI489777)SNP_20249 | 81   | T | C | 25  | 6   | --   | -- |
|            | Ca(ICC2/PI489777)SNP_20250 | 171  | C | A | 121 | 49  | --   | -- |
| CakTC29316 | Ca(ICC2/PI489777)SNP_20251 | 487  | G | A | 10  | 11  | --   | -- |
| CakTC33872 | Ca(ICC2/PI489777)SNP_20252 | 757  | G | A | 13  | 9   | --   | -- |
| CakTC23328 | Ca(ICC2/PI489777)SNP_20253 | 65   | T | C | 56  | 26  | --   | -- |
|            | Ca(ICC2/PI489777)SNP_20254 | 126  | A | C | 255 | 81  | --   | -- |
|            | Ca(ICC2/PI489777)SNP_20255 | 214  | A | G | 267 | 89  | --   | -- |
| CakTC25878 | Ca(ICC2/PI489777)SNP_20256 | 423  | T | A | 155 | 63  | --   | -- |
|            | Ca(ICC2/PI489777)SNP_20257 | 470  | A | G | 26  | 31  | --   | -- |
|            | Ca(ICC2/PI489777)SNP_20258 | 473  | G | A | 22  | 26  | --   | -- |
|            | Ca(ICC2/PI489777)SNP_20259 | 563  | G | A | 12  | 18  | --   | -- |
|            | Ca(ICC2/PI489777)SNP_20260 | 587  | T | C | 12  | 17  | --   | -- |
|            | Ca(ICC2/PI489777)SNP_20261 | 595  | C | A | 12  | 15  | --   | -- |
| CakTC30725 | Ca(ICC2/PI489777)SNP_20262 | 854  | T | C | 5   | 10  | --   | -- |
|            | Ca(ICC2/PI489777)SNP_20263 | 1003 | T | A | 4   | 8   | --   | -- |
| CakTC39864 | Ca(ICC2/PI489777)SNP_20264 | 318  | T | C | 28  | 21  | Root | -- |
|            | Ca(ICC2/PI489777)SNP_20265 | 354  | A | G | 27  | 23  | Root | -- |
|            | Ca(ICC2/PI489777)SNP_20266 | 489  | G | C | 24  | 19  | Root | -- |
|            | Ca(ICC2/PI489777)SNP_20267 | 777  | G | C | 26  | 23  | Root | -- |
| CakTC40994 | Ca(ICC2/PI489777)SNP_20268 | 251  | A | G | 20  | 6   | --   | -- |
|            | Ca(ICC2/PI489777)SNP_20269 | 308  | G | A | 23  | 7   | --   | -- |
|            | Ca(ICC2/PI489777)SNP_20270 | 467  | A | G | 33  | 8   | --   | -- |
|            | Ca(ICC2/PI489777)SNP_20271 | 518  | C | T | 27  | 8   | --   | -- |

|            |                            |      |   |   |     |     |        |     |
|------------|----------------------------|------|---|---|-----|-----|--------|-----|
|            | Ca(ICC2/PI489777)SNP_20272 | 1648 | T | G | 10  | 4   | --     | --  |
|            | Ca(ICC2/PI489777)SNP_20273 | 1691 | G | C | 7   | 4   | --     | --  |
|            | Ca(ICC2/PI489777)SNP_20274 | 1757 | C | G | 8   | 4   | --     | --  |
| CakTC23917 | Ca(ICC2/PI489777)SNP_20275 | 699  | C | T | 528 | 190 | --     | --  |
| CakTC27331 | Ca(ICC2/PI489777)SNP_20276 | 445  | A | G | 16  | 11  | --     | --  |
|            | Ca(ICC2/PI489777)SNP_20277 | 482  | G | C | 21  | 11  | --     | --  |
|            | Ca(ICC2/PI489777)SNP_20278 | 483  | C | T | 21  | 11  | --     | --  |
|            | Ca(ICC2/PI489777)SNP_20279 | 1196 | A | G | 13  | 8   | --     | --  |
|            | Ca(ICC2/PI489777)SNP_20280 | 1197 | C | T | 13  | 8   | --     | --  |
|            | Ca(ICC2/PI489777)SNP_20281 | 1209 | T | C | 13  | 9   | --     | --  |
|            | Ca(ICC2/PI489777)SNP_20282 | 1395 | T | A | 25  | 5   | --     | --  |
| CakTC38236 | Ca(ICC2/PI489777)SNP_20283 | 380  | T | C | 55  | 9   | --     | NAC |
|            | Ca(ICC2/PI489777)SNP_20284 | 1161 | T | C | 123 | 15  | --     | NAC |
| CakTC27736 | Ca(ICC2/PI489777)SNP_20285 | 443  | C | T | 39  | 33  | --     | --  |
|            | Ca(ICC2/PI489777)SNP_20286 | 651  | G | A | 36  | 34  | --     | --  |
|            | Ca(ICC2/PI489777)SNP_20287 | 872  | C | T | 27  | 17  | --     | --  |
|            | Ca(ICC2/PI489777)SNP_20288 | 1115 | G | C | 38  | 11  | --     | --  |
|            | Ca(ICC2/PI489777)SNP_20289 | 1158 | A | G | 45  | 15  | --     | --  |
|            | Ca(ICC2/PI489777)SNP_20290 | 1673 | T | C | 24  | 6   | --     | --  |
|            | Ca(ICC2/PI489777)SNP_20291 | 1760 | T | A | 24  | 6   | --     | --  |
|            | Ca(ICC2/PI489777)SNP_20292 | 1821 | A | G | 26  | 9   | --     | --  |
|            | Ca(ICC2/PI489777)SNP_20293 | 2466 | G | A | 14  | 11  | --     | --  |
|            | Ca(ICC2/PI489777)SNP_20294 | 2523 | A | G | 12  | 9   | --     | --  |
|            | Ca(ICC2/PI489777)SNP_20295 | 2630 | A | G | 12  | 9   | --     | --  |
|            | Ca(ICC2/PI489777)SNP_20296 | 2769 | A | G | 16  | 10  | --     | --  |
|            | Ca(ICC2/PI489777)SNP_20297 | 2964 | C | T | 18  | 8   | --     | --  |
|            | Ca(ICC2/PI489777)SNP_20298 | 3132 | T | C | 12  | 4   | --     | --  |
|            | Ca(ICC2/PI489777)SNP_20299 | 3306 | T | C | 9   | 12  | --     | --  |
|            | Ca(ICC2/PI489777)SNP_20300 | 3324 | A | T | 7   | 14  | --     | --  |
|            | Ca(ICC2/PI489777)SNP_20301 | 3483 | A | G | 14  | 10  | --     | --  |
|            | Ca(ICC2/PI489777)SNP_20302 | 3915 | G | T | 5   | 13  | --     | --  |
|            | Ca(ICC2/PI489777)SNP_20303 | 4293 | C | T | 11  | 6   | --     | --  |
|            | Ca(ICC2/PI489777)SNP_20304 | 5110 | T | C | 12  | 3   | --     | --  |
| CakTC06566 | Ca(ICC2/PI489777)SNP_20305 | 383  | G | A | 3   | 5   | Flower | bud |
|            | Ca(ICC2/PI489777)SNP_20306 | 583  | A | C | 3   | 4   | Flower | bud |
| CakTC38792 | Ca(ICC2/PI489777)SNP_20307 | 861  | A | C | 4   | 9   | --     | --  |
|            | Ca(ICC2/PI489777)SNP_20308 | 897  | C | G | 6   | 9   | --     | --  |
|            | Ca(ICC2/PI489777)SNP_20309 | 920  | A | C | 5   | 9   | --     | --  |
|            | Ca(ICC2/PI489777)SNP_20310 | 970  | G | C | 5   | 11  | --     | --  |
|            | Ca(ICC2/PI489777)SNP_20311 | 984  | C | A | 6   | 11  | --     | --  |
|            | Ca(ICC2/PI489777)SNP_20312 | 1077 | A | G | 6   | 11  | --     | --  |
| CakTC34032 | Ca(ICC2/PI489777)SNP_20313 | 163  | G | A | 6   | 3   | --     | --  |
| CakTC40557 | Ca(ICC2/PI489777)SNP_20314 | 255  | G | A | 21  | 23  | --     | --  |
|            | Ca(ICC2/PI489777)SNP_20315 | 363  | C | T | 19  | 20  | --     | --  |
|            | Ca(ICC2/PI489777)SNP_20316 | 656  | C | T | 14  | 3   | --     | --  |
| CakTC40548 | Ca(ICC2/PI489777)SNP_20317 | 104  | G | A | 6   | 4   | --     | --  |
|            | Ca(ICC2/PI489777)SNP_20318 | 204  | T | A | 8   | 5   | --     | --  |
|            | Ca(ICC2/PI489777)SNP_20319 | 387  | C | A | 13  | 3   | --     | --  |
|            | Ca(ICC2/PI489777)SNP_20320 | 414  | T | C | 14  | 4   | --     | --  |
|            | Ca(ICC2/PI489777)SNP_20321 | 477  | C | T | 16  | 4   | --     | --  |
|            | Ca(ICC2/PI489777)SNP_20322 | 522  | T | C | 14  | 3   | --     | --  |
| CakTC25958 | Ca(ICC2/PI489777)SNP_20323 | 1605 | A | G | 10  | 7   | --     | --  |
|            | Ca(ICC2/PI489777)SNP_20324 | 1616 | C | T | 8   | 6   | --     | --  |
|            | Ca(ICC2/PI489777)SNP_20325 | 1719 | A | C | 7   | 5   | --     | --  |
| CakTC37712 | Ca(ICC2/PI489777)SNP_20326 | 852  | A | G | 5   | 4   | --     | --  |
| CakTC40139 | Ca(ICC2/PI489777)SNP_20327 | 169  | G | C | 4   | 4   | --     | --  |
|            | Ca(ICC2/PI489777)SNP_20328 | 249  | T | A | 4   | 6   | --     | --  |
|            | Ca(ICC2/PI489777)SNP_20329 | 295  | C | T | 5   | 6   | --     | --  |
|            | Ca(ICC2/PI489777)SNP_20330 | 350  | C | T | 5   | 7   | --     | --  |
| CakTC26301 | Ca(ICC2/PI489777)SNP_20331 | 889  | A | C | 23  | 8   | --     | --  |
|            | Ca(ICC2/PI489777)SNP_20332 | 1192 | T | C | 22  | 7   | --     | --  |
|            | Ca(ICC2/PI489777)SNP_20333 | 1333 | T | G | 30  | 8   | --     | --  |
|            | Ca(ICC2/PI489777)SNP_20334 | 1354 | A | G | 35  | 11  | --     | --  |
|            | Ca(ICC2/PI489777)SNP_20335 | 1435 | T | C | 33  | 12  | --     | --  |
|            | Ca(ICC2/PI489777)SNP_20336 | 1492 | T | A | 25  | 9   | --     | --  |
|            | Ca(ICC2/PI489777)SNP_20337 | 1537 | G | A | 31  | 4   | --     | --  |
| CakTC39136 | Ca(ICC2/PI489777)SNP_20338 | 132  | G | C | 11  | 4   | --     | --  |
|            | Ca(ICC2/PI489777)SNP_20339 | 310  | C | T | 26  | 10  | --     | --  |
|            | Ca(ICC2/PI489777)SNP_20340 | 356  | G | A | 30  | 11  | --     | --  |
|            | Ca(ICC2/PI489777)SNP_20341 | 359  | T | C | 30  | 11  | --     | --  |
|            | Ca(ICC2/PI489777)SNP_20342 | 661  | T | G | 30  | 3   | --     | --  |
|            | Ca(ICC2/PI489777)SNP_20343 | 814  | G | A | 23  | 3   | --     | --  |
|            | Ca(ICC2/PI489777)SNP_20344 | 825  | G | T | 23  | 4   | --     | --  |
|            | Ca(ICC2/PI489777)SNP_20345 | 941  | T | C | 17  | 8   | --     | --  |

|            |                            |      |   |   |    |    |        |     |
|------------|----------------------------|------|---|---|----|----|--------|-----|
|            | Ca(ICC2/PI489777)SNP_20346 | 989  | G | A | 23 | 7  | --     | --  |
|            | Ca(ICC2/PI489777)SNP_20347 | 1088 | A | G | 34 | 11 | --     | --  |
| CakTC28453 | Ca(ICC2/PI489777)SNP_20348 | 2181 | T | C | 35 | 5  | Flower | bud |
| CakTC27660 | Ca(ICC2/PI489777)SNP_20349 | 961  | T | C | 7  | 5  | --     | --  |
| CakTC38054 | Ca(ICC2/PI489777)SNP_20350 | 82   | T | C | 6  | 4  | --     | --  |
| CakTC01882 | Ca(ICC2/PI489777)SNP_20351 | 97   | A | G | 3  | 3  | --     | --  |
| CakTC32422 | Ca(ICC2/PI489777)SNP_20352 | 473  | G | A | 9  | 5  | --     | HMG |
|            | Ca(ICC2/PI489777)SNP_20353 | 944  | G | A | 20 | 3  | --     | HMG |
| CakTC36860 | Ca(ICC2/PI489777)SNP_20354 | 69   | G | A | 3  | 4  | --     | --  |
|            | Ca(ICC2/PI489777)SNP_20355 | 111  | T | C | 4  | 4  | --     | --  |
|            | Ca(ICC2/PI489777)SNP_20356 | 118  | A | G | 4  | 4  | --     | --  |
|            | Ca(ICC2/PI489777)SNP_20357 | 193  | C | T | 3  | 3  | --     | --  |
|            | Ca(ICC2/PI489777)SNP_20358 | 412  | C | G | 3  | 5  | --     | --  |
|            | Ca(ICC2/PI489777)SNP_20359 | 413  | T | C | 3  | 5  | --     | --  |
| CakTC38580 | Ca(ICC2/PI489777)SNP_20360 | 579  | G | A | 11 | 5  | --     | --  |
| CakTC24302 | Ca(ICC2/PI489777)SNP_20361 | 595  | G | T | 6  | 3  | --     | --  |
|            | Ca(ICC2/PI489777)SNP_20362 | 697  | T | C | 7  | 3  | --     | --  |
|            | Ca(ICC2/PI489777)SNP_20363 | 709  | A | C | 8  | 3  | --     | --  |
|            | Ca(ICC2/PI489777)SNP_20364 | 715  | T | C | 7  | 3  | --     | --  |
|            | Ca(ICC2/PI489777)SNP_20365 | 1137 | T | A | 14 | 4  | --     | --  |
|            | Ca(ICC2/PI489777)SNP_20366 | 1208 | C | T | 9  | 3  | --     | --  |
|            | Ca(ICC2/PI489777)SNP_20367 | 1210 | A | G | 11 | 3  | --     | --  |
| CakTC25859 | Ca(ICC2/PI489777)SNP_20368 | 137  | G | T | 4  | 3  | --     | --  |
|            | Ca(ICC2/PI489777)SNP_20369 | 849  | T | C | 21 | 8  | --     | --  |
| CakTC39097 | Ca(ICC2/PI489777)SNP_20370 | 1155 | C | A | 18 | 5  | --     | --  |
| CakTC26838 | Ca(ICC2/PI489777)SNP_20371 | 864  | T | G | 25 | 18 | --     | --  |
|            | Ca(ICC2/PI489777)SNP_20372 | 1095 | C | T | 23 | 14 | --     | --  |
| CakTC30688 | Ca(ICC2/PI489777)SNP_20373 | 593  | G | A | 3  | 3  | Flower | bud |
|            | Ca(ICC2/PI489777)SNP_20374 | 1259 | A | C | 7  | 3  | Flower | bud |
| CakTC41662 | Ca(ICC2/PI489777)SNP_20375 | 166  | G | A | 13 | 8  | --     | --  |
|            | Ca(ICC2/PI489777)SNP_20376 | 521  | C | G | 54 | 7  | --     | --  |
| CakTC22478 | Ca(ICC2/PI489777)SNP_20377 | 502  | A | G | 10 | 3  | --     | --  |
| CakTC28557 | Ca(ICC2/PI489777)SNP_20378 | 310  | T | C | 12 | 7  | --     | --  |
|            | Ca(ICC2/PI489777)SNP_20379 | 444  | C | G | 15 | 8  | --     | --  |
|            | Ca(ICC2/PI489777)SNP_20380 | 772  | A | T | 17 | 3  | --     | --  |
|            | Ca(ICC2/PI489777)SNP_20381 | 1089 | A | C | 26 | 5  | --     | --  |
|            | Ca(ICC2/PI489777)SNP_20382 | 1258 | T | C | 25 | 5  | --     | --  |
|            | Ca(ICC2/PI489777)SNP_20383 | 1307 | C | G | 22 | 5  | --     | --  |
|            | Ca(ICC2/PI489777)SNP_20384 | 1309 | C | T | 22 | 4  | --     | --  |
|            | Ca(ICC2/PI489777)SNP_20385 | 1367 | C | T | 27 | 4  | --     | --  |
| CakTC33116 | Ca(ICC2/PI489777)SNP_20386 | 157  | A | G | 7  | 13 | --     | --  |
|            | Ca(ICC2/PI489777)SNP_20387 | 568  | T | C | 6  | 5  | --     | --  |
|            | Ca(ICC2/PI489777)SNP_20388 | 1164 | A | T | 12 | 9  | --     | --  |
|            | Ca(ICC2/PI489777)SNP_20389 | 1181 | G | A | 10 | 10 | --     | --  |
|            | Ca(ICC2/PI489777)SNP_20390 | 1277 | A | G | 7  | 6  | --     | --  |
|            | Ca(ICC2/PI489777)SNP_20391 | 1285 | A | G | 12 | 6  | --     | --  |
|            | Ca(ICC2/PI489777)SNP_20392 | 1400 | T | A | 10 | 4  | --     | --  |
|            | Ca(ICC2/PI489777)SNP_20393 | 1542 | G | A | 5  | 3  | --     | --  |
|            | Ca(ICC2/PI489777)SNP_20394 | 1905 | G | T | 6  | 7  | --     | --  |
|            | Ca(ICC2/PI489777)SNP_20395 | 1963 | T | C | 5  | 4  | --     | --  |
| CakTC38256 | Ca(ICC2/PI489777)SNP_20396 | 835  | C | T | 7  | 4  | --     | PHD |
|            | Ca(ICC2/PI489777)SNP_20397 | 952  | G | A | 9  | 5  | --     | PHD |
| CakTC38932 | Ca(ICC2/PI489777)SNP_20398 | 195  | T | C | 8  | 3  | --     | --  |
|            | Ca(ICC2/PI489777)SNP_20399 | 430  | C | T | 4  | 3  | --     | --  |
|            | Ca(ICC2/PI489777)SNP_20400 | 2749 | T | C | 5  | 4  | --     | --  |
| CakTC27777 | Ca(ICC2/PI489777)SNP_20401 | 176  | T | A | 5  | 4  | Shoot  | --  |
|            | Ca(ICC2/PI489777)SNP_20402 | 405  | A | G | 4  | 4  | Shoot  | --  |
|            | Ca(ICC2/PI489777)SNP_20403 | 536  | C | T | 14 | 9  | Shoot  | --  |
| CakTC09579 | Ca(ICC2/PI489777)SNP_20404 | 687  | A | G | 8  | 9  | --     | --  |
| CakTC34022 | Ca(ICC2/PI489777)SNP_20405 | 657  | T | C | 9  | 12 | --     | --  |
|            | Ca(ICC2/PI489777)SNP_20406 | 1512 | T | G | 30 | 11 | --     | --  |
|            | Ca(ICC2/PI489777)SNP_20407 | 1754 | T | A | 9  | 12 | --     | --  |
|            | Ca(ICC2/PI489777)SNP_20408 | 1767 | C | T | 9  | 10 | --     | --  |
| CakTC34321 | Ca(ICC2/PI489777)SNP_20409 | 675  | C | A | 19 | 12 | --     | --  |
|            | Ca(ICC2/PI489777)SNP_20410 | 676  | A | G | 19 | 12 | --     | --  |
|            | Ca(ICC2/PI489777)SNP_20411 | 763  | A | T | 14 | 10 | --     | --  |
|            | Ca(ICC2/PI489777)SNP_20412 | 774  | G | T | 15 | 12 | --     | --  |
| CakTC31629 | Ca(ICC2/PI489777)SNP_20413 | 1006 | G | A | 8  | 3  | --     | --  |
|            | Ca(ICC2/PI489777)SNP_20414 | 2500 | T | C | 7  | 11 | --     | --  |
| CakTC32892 | Ca(ICC2/PI489777)SNP_20415 | 137  | C | T | 6  | 6  | --     | --  |
|            | Ca(ICC2/PI489777)SNP_20416 | 680  | A | G | 9  | 8  | --     | --  |
|            | Ca(ICC2/PI489777)SNP_20417 | 1589 | G | A | 13 | 5  | --     | --  |
|            | Ca(ICC2/PI489777)SNP_20418 | 1652 | G | A | 12 | 9  | --     | --  |
|            | Ca(ICC2/PI489777)SNP_20419 | 1922 | A | G | 12 | 12 | --     | --  |

|            |                             |      |   |   |    |    |       |      |
|------------|-----------------------------|------|---|---|----|----|-------|------|
| CakTC37889 | Ca(ICCV2/PI489777)SNP_20420 | 812  | G | A | 33 | 11 | --    | --   |
|            | Ca(ICCV2/PI489777)SNP_20421 | 1572 | C | G | 15 | 5  | --    | --   |
| CakTC26619 | Ca(ICCV2/PI489777)SNP_20422 | 763  | A | C | 4  | 5  | --    | --   |
| CakTC10668 | Ca(ICCV2/PI489777)SNP_20423 | 228  | A | C | 25 | 3  | --    | --   |
|            | Ca(ICCV2/PI489777)SNP_20424 | 536  | A | G | 19 | 8  | --    | --   |
|            | Ca(ICCV2/PI489777)SNP_20425 | 1552 | C | T | 21 | 9  | --    | --   |
|            | Ca(ICCV2/PI489777)SNP_20426 | 1739 | C | T | 16 | 13 | --    | --   |
|            | Ca(ICCV2/PI489777)SNP_20427 | 1871 | A | G | 6  | 8  | --    | --   |
| CakTC42265 | Ca(ICCV2/PI489777)SNP_20428 | 247  | T | G | 16 | 16 | --    | --   |
|            | Ca(ICCV2/PI489777)SNP_20429 | 417  | T | C | 27 | 30 | --    | --   |
|            | Ca(ICCV2/PI489777)SNP_20430 | 591  | C | G | 33 | 20 | --    | --   |
| CakTC26076 | Ca(ICCV2/PI489777)SNP_20431 | 1263 | C | G | 59 | 20 | --    | --   |
| CakTC35420 | Ca(ICCV2/PI489777)SNP_20432 | 1109 | G | A | 7  | 3  | --    | --   |
|            | Ca(ICCV2/PI489777)SNP_20433 | 1110 | G | T | 7  | 3  | --    | --   |
|            | Ca(ICCV2/PI489777)SNP_20434 | 2183 | A | G | 3  | 12 | --    | --   |
|            | Ca(ICCV2/PI489777)SNP_20435 | 2481 | C | T | 5  | 9  | --    | --   |
| CakTC30161 | Ca(ICCV2/PI489777)SNP_20436 | 409  | G | A | 9  | 9  | --    | bHLH |
|            | Ca(ICCV2/PI489777)SNP_20437 | 505  | A | G | 5  | 7  | --    | bHLH |
|            | Ca(ICCV2/PI489777)SNP_20438 | 566  | T | C | 5  | 5  | --    | bHLH |
|            | Ca(ICCV2/PI489777)SNP_20439 | 583  | A | G | 6  | 9  | --    | bHLH |
|            | Ca(ICCV2/PI489777)SNP_20440 | 584  | T | G | 6  | 9  | --    | bHLH |
|            | Ca(ICCV2/PI489777)SNP_20441 | 600  | T | C | 6  | 8  | --    | bHLH |
|            | Ca(ICCV2/PI489777)SNP_20442 | 613  | C | G | 5  | 9  | --    | bHLH |
|            | Ca(ICCV2/PI489777)SNP_20443 | 691  | T | A | 4  | 4  | --    | bHLH |
| CakTC08067 | Ca(ICCV2/PI489777)SNP_20444 | 531  | A | G | 23 | 9  | --    | --   |
| CakTC29429 | Ca(ICCV2/PI489777)SNP_20445 | 418  | C | T | 16 | 4  | --    | --   |
|            | Ca(ICCV2/PI489777)SNP_20446 | 871  | C | G | 3  | 3  | --    | --   |
| CakTC33795 | Ca(ICCV2/PI489777)SNP_20447 | 271  | G | A | 29 | 6  | --    | --   |
|            | Ca(ICCV2/PI489777)SNP_20448 | 316  | A | G | 29 | 7  | --    | --   |
|            | Ca(ICCV2/PI489777)SNP_20449 | 379  | G | A | 34 | 6  | --    | --   |
|            | Ca(ICCV2/PI489777)SNP_20450 | 481  | G | A | 32 | 5  | --    | --   |
|            | Ca(ICCV2/PI489777)SNP_20451 | 568  | G | A | 30 | 3  | --    | --   |
| CakTC42438 | Ca(ICCV2/PI489777)SNP_20452 | 88   | C | A | 6  | 3  | --    | --   |
|            | Ca(ICCV2/PI489777)SNP_20453 | 97   | T | C | 7  | 4  | --    | --   |
|            | Ca(ICCV2/PI489777)SNP_20454 | 137  | C | T | 17 | 17 | --    | --   |
|            | Ca(ICCV2/PI489777)SNP_20455 | 143  | A | C | 15 | 18 | --    | --   |
|            | Ca(ICCV2/PI489777)SNP_20456 | 465  | G | T | 45 | 56 | --    | --   |
|            | Ca(ICCV2/PI489777)SNP_20457 | 534  | T | C | 33 | 52 | --    | --   |
| CakTC26610 | Ca(ICCV2/PI489777)SNP_20458 | 1084 | T | C | 27 | 50 | --    | --   |
|            | Ca(ICCV2/PI489777)SNP_20459 | 1362 | G | A | 14 | 26 | --    | --   |
| CakTC41008 | Ca(ICCV2/PI489777)SNP_20460 | 299  | T | C | 4  | 14 | --    | --   |
|            | Ca(ICCV2/PI489777)SNP_20461 | 610  | G | A | 54 | 26 | --    | --   |
|            | Ca(ICCV2/PI489777)SNP_20462 | 680  | G | C | 48 | 23 | --    | --   |
|            | Ca(ICCV2/PI489777)SNP_20463 | 1679 | C | G | 26 | 12 | --    | --   |
|            | Ca(ICCV2/PI489777)SNP_20464 | 1766 | T | C | 19 | 12 | --    | --   |
| CakTC38354 | Ca(ICCV2/PI489777)SNP_20465 | 684  | A | G | 13 | 9  | --    | --   |
|            | Ca(ICCV2/PI489777)SNP_20466 | 711  | A | G | 11 | 11 | --    | --   |
|            | Ca(ICCV2/PI489777)SNP_20467 | 846  | G | A | 13 | 13 | --    | --   |
|            | Ca(ICCV2/PI489777)SNP_20468 | 861  | G | A | 13 | 13 | --    | --   |
|            | Ca(ICCV2/PI489777)SNP_20469 | 1314 | G | A | 11 | 13 | --    | --   |
|            | Ca(ICCV2/PI489777)SNP_20470 | 1489 | T | A | 4  | 10 | --    | --   |
| CakTC03344 | Ca(ICCV2/PI489777)SNP_20471 | 637  | A | G | 9  | 5  | --    | --   |
|            | Ca(ICCV2/PI489777)SNP_20472 | 702  | G | T | 6  | 5  | --    | --   |
| CakTC09051 | Ca(ICCV2/PI489777)SNP_20473 | 1635 | G | A | 6  | 4  | --    | --   |
| CakTC34111 | Ca(ICCV2/PI489777)SNP_20474 | 545  | G | A | 20 | 7  | --    | --   |
|            | Ca(ICCV2/PI489777)SNP_20475 | 791  | A | C | 14 | 5  | --    | --   |
| CakTC42365 | Ca(ICCV2/PI489777)SNP_20476 | 245  | G | A | 14 | 5  | --    | WRKY |
|            | Ca(ICCV2/PI489777)SNP_20477 | 283  | A | G | 16 | 4  | --    | WRKY |
|            | Ca(ICCV2/PI489777)SNP_20478 | 315  | T | G | 17 | 5  | --    | WRKY |
|            | Ca(ICCV2/PI489777)SNP_20479 | 376  | T | G | 18 | 5  | --    | WRKY |
|            | Ca(ICCV2/PI489777)SNP_20480 | 378  | T | G | 18 | 5  | --    | WRKY |
|            | Ca(ICCV2/PI489777)SNP_20481 | 1063 | A | G | 22 | 4  | --    | WRKY |
| CakTC30484 | Ca(ICCV2/PI489777)SNP_20482 | 399  | A | G | 3  | 3  | Shoot | --   |
|            | Ca(ICCV2/PI489777)SNP_20483 | 576  | A | G | 3  | 3  | Shoot | --   |
|            | Ca(ICCV2/PI489777)SNP_20484 | 1837 | C | T | 5  | 3  | Shoot | --   |
| CakTC32748 | Ca(ICCV2/PI489777)SNP_20485 | 1866 | C | G | 12 | 3  | --    | --   |
| CakTC40402 | Ca(ICCV2/PI489777)SNP_20486 | 642  | T | A | 10 | 5  | --    | --   |
| CakTC33857 | Ca(ICCV2/PI489777)SNP_20487 | 252  | G | A | 12 | 4  | --    | --   |
|            | Ca(ICCV2/PI489777)SNP_20488 | 386  | C | T | 13 | 6  | --    | --   |
|            | Ca(ICCV2/PI489777)SNP_20489 | 1637 | G | A | 11 | 4  | --    | --   |
|            | Ca(ICCV2/PI489777)SNP_20490 | 2291 | T | G | 5  | 5  | --    | --   |
|            | Ca(ICCV2/PI489777)SNP_20491 | 2325 | T | C | 5  | 5  | --    | --   |
| CakTC37975 | Ca(ICCV2/PI489777)SNP_20492 | 434  | T | A | 13 | 5  | --    | --   |
| CakTC11113 | Ca(ICCV2/PI489777)SNP_20493 | 1516 | C | T | 15 | 10 | --    | --   |

|            |                            |      |   |   |     |    |    |     |
|------------|----------------------------|------|---|---|-----|----|----|-----|
|            | Ca(ICC2/PI489777)SNP_20494 | 1576 | G | A | 18  | 10 | -- | --  |
|            | Ca(ICC2/PI489777)SNP_20495 | 2306 | C | T | 10  | 6  | -- | --  |
|            | Ca(ICC2/PI489777)SNP_20496 | 2333 | G | A | 13  | 4  | -- | --  |
|            | Ca(ICC2/PI489777)SNP_20497 | 2441 | T | C | 9   | 4  | -- | --  |
|            | Ca(ICC2/PI489777)SNP_20498 | 2456 | A | C | 6   | 4  | -- | --  |
|            | Ca(ICC2/PI489777)SNP_20499 | 2457 | A | G | 6   | 4  | -- | --  |
|            | Ca(ICC2/PI489777)SNP_20500 | 2466 | C | T | 9   | 4  | -- | --  |
|            | Ca(ICC2/PI489777)SNP_20501 | 2482 | T | C | 9   | 3  | -- | --  |
| CakTC40730 | Ca(ICC2/PI489777)SNP_20502 | 209  | A | G | 7   | 4  | -- | --  |
|            | Ca(ICC2/PI489777)SNP_20503 | 253  | C | A | 10  | 10 | -- | --  |
|            | Ca(ICC2/PI489777)SNP_20504 | 323  | C | G | 20  | 21 | -- | --  |
|            | Ca(ICC2/PI489777)SNP_20505 | 527  | T | A | 28  | 18 | -- | --  |
|            | Ca(ICC2/PI489777)SNP_20506 | 1226 | T | A | 16  | 8  | -- | --  |
|            | Ca(ICC2/PI489777)SNP_20507 | 1403 | T | G | 14  | 14 | -- | --  |
|            | Ca(ICC2/PI489777)SNP_20508 | 1442 | A | G | 14  | 14 | -- | --  |
|            | Ca(ICC2/PI489777)SNP_20509 | 1568 | A | G | 9   | 9  | -- | --  |
|            | Ca(ICC2/PI489777)SNP_20510 | 1679 | G | T | 12  | 5  | -- | --  |
|            | Ca(ICC2/PI489777)SNP_20511 | 1798 | G | A | 7   | 4  | -- | --  |
|            | Ca(ICC2/PI489777)SNP_20512 | 1985 | G | C | 8   | 4  | -- | --  |
| CakTC38612 | Ca(ICC2/PI489777)SNP_20513 | 325  | G | A | 4   | 7  | -- | --  |
| CakTC30331 | Ca(ICC2/PI489777)SNP_20514 | 727  | T | A | 5   | 3  | -- | --  |
|            | Ca(ICC2/PI489777)SNP_20515 | 1627 | G | C | 10  | 6  | -- | --  |
|            | Ca(ICC2/PI489777)SNP_20516 | 1846 | T | G | 10  | 4  | -- | --  |
|            | Ca(ICC2/PI489777)SNP_20517 | 2557 | A | T | 13  | 8  | -- | --  |
| CakTC12492 | Ca(ICC2/PI489777)SNP_20518 | 1749 | T | C | 3   | 4  | -- | --  |
|            | Ca(ICC2/PI489777)SNP_20519 | 2172 | A | G | 4   | 3  | -- | --  |
| CakTC34071 | Ca(ICC2/PI489777)SNP_20520 | 152  | T | C | 4   | 11 | -- | --  |
|            | Ca(ICC2/PI489777)SNP_20521 | 683  | T | A | 37  | 31 | -- | --  |
|            | Ca(ICC2/PI489777)SNP_20522 | 836  | C | T | 41  | 27 | -- | --  |
|            | Ca(ICC2/PI489777)SNP_20523 | 2021 | G | A | 8   | 8  | -- | --  |
|            | Ca(ICC2/PI489777)SNP_20524 | 2115 | C | T | 5   | 6  | -- | --  |
|            | Ca(ICC2/PI489777)SNP_20525 | 2118 | T | C | 5   | 7  | -- | --  |
| CakTC38265 | Ca(ICC2/PI489777)SNP_20526 | 403  | C | T | 16  | 29 | -- | CSD |
|            | Ca(ICC2/PI489777)SNP_20527 | 424  | G | A | 24  | 32 | -- | CSD |
|            | Ca(ICC2/PI489777)SNP_20528 | 448  | G | A | 25  | 32 | -- | CSD |
|            | Ca(ICC2/PI489777)SNP_20529 | 671  | C | T | 24  | 32 | -- | CSD |
| CakTC34092 | Ca(ICC2/PI489777)SNP_20530 | 216  | C | T | 5   | 5  | -- | --  |
|            | Ca(ICC2/PI489777)SNP_20531 | 282  | C | T | 6   | 7  | -- | --  |
|            | Ca(ICC2/PI489777)SNP_20532 | 359  | A | T | 8   | 7  | -- | --  |
|            | Ca(ICC2/PI489777)SNP_20533 | 374  | G | T | 8   | 7  | -- | --  |
|            | Ca(ICC2/PI489777)SNP_20534 | 387  | G | T | 7   | 9  | -- | --  |
|            | Ca(ICC2/PI489777)SNP_20535 | 391  | A | C | 5   | 10 | -- | --  |
|            | Ca(ICC2/PI489777)SNP_20536 | 460  | C | T | 4   | 10 | -- | --  |
|            | Ca(ICC2/PI489777)SNP_20537 | 525  | G | T | 5   | 10 | -- | --  |
|            | Ca(ICC2/PI489777)SNP_20538 | 726  | A | T | 8   | 13 | -- | --  |
|            | Ca(ICC2/PI489777)SNP_20539 | 903  | T | G | 13  | 10 | -- | --  |
|            | Ca(ICC2/PI489777)SNP_20540 | 960  | A | G | 9   | 5  | -- | --  |
| CakTC37174 | Ca(ICC2/PI489777)SNP_20541 | 208  | G | A | 5   | 6  | -- | --  |
| CakTC32351 | Ca(ICC2/PI489777)SNP_20542 | 602  | C | A | 9   | 3  | -- | --  |
|            | Ca(ICC2/PI489777)SNP_20543 | 743  | T | C | 11  | 3  | -- | --  |
|            | Ca(ICC2/PI489777)SNP_20544 | 1947 | C | T | 8   | 3  | -- | --  |
| CakTC32613 | Ca(ICC2/PI489777)SNP_20545 | 510  | G | A | 35  | 45 | -- | --  |
|            | Ca(ICC2/PI489777)SNP_20546 | 514  | G | A | 34  | 45 | -- | --  |
|            | Ca(ICC2/PI489777)SNP_20547 | 543  | C | T | 31  | 48 | -- | --  |
|            | Ca(ICC2/PI489777)SNP_20548 | 549  | T | C | 30  | 44 | -- | --  |
|            | Ca(ICC2/PI489777)SNP_20549 | 615  | G | A | 27  | 50 | -- | --  |
|            | Ca(ICC2/PI489777)SNP_20550 | 627  | A | G | 23  | 44 | -- | --  |
|            | Ca(ICC2/PI489777)SNP_20551 | 1335 | C | T | 111 | 60 | -- | --  |
|            | Ca(ICC2/PI489777)SNP_20552 | 1362 | C | T | 101 | 70 | -- | --  |
|            | Ca(ICC2/PI489777)SNP_20553 | 1464 | G | A | 85  | 79 | -- | --  |
|            | Ca(ICC2/PI489777)SNP_20554 | 1560 | A | G | 89  | 69 | -- | --  |
|            | Ca(ICC2/PI489777)SNP_20555 | 2134 | T | G | 8   | 8  | -- | --  |
|            | Ca(ICC2/PI489777)SNP_20556 | 2165 | A | T | 6   | 8  | -- | --  |
| CakTC16715 | Ca(ICC2/PI489777)SNP_20557 | 232  | A | G | 3   | 3  | -- | --  |
| CakTC39213 | Ca(ICC2/PI489777)SNP_20558 | 193  | T | A | 26  | 11 | -- | --  |
|            | Ca(ICC2/PI489777)SNP_20559 | 1205 | C | T | 34  | 14 | -- | --  |
|            | Ca(ICC2/PI489777)SNP_20560 | 1267 | C | T | 28  | 13 | -- | --  |
|            | Ca(ICC2/PI489777)SNP_20561 | 1412 | A | G | 17  | 11 | -- | --  |
|            | Ca(ICC2/PI489777)SNP_20562 | 1419 | C | T | 17  | 11 | -- | --  |
| CakTC27747 | Ca(ICC2/PI489777)SNP_20563 | 287  | T | C | 9   | 4  | -- | --  |
|            | Ca(ICC2/PI489777)SNP_20564 | 458  | C | T | 5   | 9  | -- | --  |
|            | Ca(ICC2/PI489777)SNP_20565 | 611  | G | A | 12  | 7  | -- | --  |
|            | Ca(ICC2/PI489777)SNP_20566 | 637  | T | C | 11  | 8  | -- | --  |
| CakTC39848 | Ca(ICC2/PI489777)SNP_20567 | 1107 | A | T | 33  | 36 | -- | --  |

|            |                             |      |   |   |    |    |    |             |
|------------|-----------------------------|------|---|---|----|----|----|-------------|
|            | Ca(ICCV2/PI489777)SNP_20568 | 1553 | C | A | 9  | 21 | -- | --          |
| CakTC22312 | Ca(ICCV2/PI489777)SNP_20569 | 303  | G | A | 7  | 20 | -- | --          |
|            | Ca(ICCV2/PI489777)SNP_20570 | 419  | A | G | 5  | 18 | -- | --          |
|            | Ca(ICCV2/PI489777)SNP_20571 | 1418 | T | C | 30 | 35 | -- | --          |
|            | Ca(ICCV2/PI489777)SNP_20572 | 1582 | T | A | 13 | 45 | -- | --          |
| CakTC40441 | Ca(ICCV2/PI489777)SNP_20573 | 379  | T | C | 5  | 3  | -- | --          |
| CakTC42175 | Ca(ICCV2/PI489777)SNP_20574 | 49   | C | T | 5  | 4  | -- | --          |
|            | Ca(ICCV2/PI489777)SNP_20575 | 184  | A | T | 9  | 4  | -- | --          |
|            | Ca(ICCV2/PI489777)SNP_20576 | 185  | C | G | 9  | 4  | -- | --          |
|            | Ca(ICCV2/PI489777)SNP_20577 | 271  | T | C | 14 | 4  | -- | --          |
|            | Ca(ICCV2/PI489777)SNP_20578 | 574  | T | C | 10 | 6  | -- | --          |
|            | Ca(ICCV2/PI489777)SNP_20579 | 1316 | C | T | 5  | 5  | -- | --          |
| CakTC33467 | Ca(ICCV2/PI489777)SNP_20580 | 172  | G | A | 11 | 23 | -- | --          |
|            | Ca(ICCV2/PI489777)SNP_20581 | 248  | G | A | 13 | 24 | -- | --          |
|            | Ca(ICCV2/PI489777)SNP_20582 | 305  | A | G | 18 | 20 | -- | --          |
|            | Ca(ICCV2/PI489777)SNP_20583 | 552  | C | G | 15 | 13 | -- | --          |
|            | Ca(ICCV2/PI489777)SNP_20584 | 562  | C | A | 15 | 12 | -- | --          |
| CakTC29771 | Ca(ICCV2/PI489777)SNP_20585 | 246  | A | G | 6  | 3  | -- | --          |
|            | Ca(ICCV2/PI489777)SNP_20586 | 326  | A | G | 6  | 3  | -- | --          |
|            | Ca(ICCV2/PI489777)SNP_20587 | 336  | A | G | 3  | 3  | -- | --          |
|            | Ca(ICCV2/PI489777)SNP_20588 | 1544 | A | G | 3  | 3  | -- | --          |
|            | Ca(ICCV2/PI489777)SNP_20589 | 1545 | T | A | 3  | 3  | -- | --          |
| CakTC29339 | Ca(ICCV2/PI489777)SNP_20590 | 470  | G | A | 4  | 3  | -- | --          |
| CakTC41792 | Ca(ICCV2/PI489777)SNP_20591 | 40   | G | A | 13 | 16 | -- | --          |
|            | Ca(ICCV2/PI489777)SNP_20592 | 162  | C | A | 26 | 26 | -- | --          |
|            | Ca(ICCV2/PI489777)SNP_20593 | 227  | G | A | 37 | 22 | -- | --          |
|            | Ca(ICCV2/PI489777)SNP_20594 | 302  | T | C | 44 | 27 | -- | --          |
|            | Ca(ICCV2/PI489777)SNP_20595 | 950  | A | T | 54 | 38 | -- | --          |
|            | Ca(ICCV2/PI489777)SNP_20596 | 1058 | C | T | 45 | 21 | -- | --          |
|            | Ca(ICCV2/PI489777)SNP_20597 | 1061 | C | T | 48 | 26 | -- | --          |
|            | Ca(ICCV2/PI489777)SNP_20598 | 1544 | A | G | 27 | 34 | -- | --          |
|            | Ca(ICCV2/PI489777)SNP_20599 | 1928 | A | G | 30 | 38 | -- | --          |
|            | Ca(ICCV2/PI489777)SNP_20600 | 2000 | G | A | 25 | 28 | -- | --          |
|            | Ca(ICCV2/PI489777)SNP_20601 | 2101 | A | G | 24 | 23 | -- | --          |
|            | Ca(ICCV2/PI489777)SNP_20602 | 2191 | G | C | 18 | 27 | -- | --          |
| CakTC36913 | Ca(ICCV2/PI489777)SNP_20603 | 395  | T | C | 7  | 10 | -- | --          |
|            | Ca(ICCV2/PI489777)SNP_20604 | 468  | C | T | 8  | 14 | -- | --          |
|            | Ca(ICCV2/PI489777)SNP_20605 | 684  | A | G | 13 | 9  | -- | --          |
|            | Ca(ICCV2/PI489777)SNP_20606 | 934  | C | T | 8  | 6  | -- | --          |
|            | Ca(ICCV2/PI489777)SNP_20607 | 1593 | A | G | 9  | 6  | -- | --          |
|            | Ca(ICCV2/PI489777)SNP_20608 | 1731 | G | A | 13 | 5  | -- | --          |
|            | Ca(ICCV2/PI489777)SNP_20609 | 1975 | A | G | 11 | 5  | -- | --          |
| CakTC24495 | Ca(ICCV2/PI489777)SNP_20610 | 751  | A | G | 19 | 18 | -- | --          |
|            | Ca(ICCV2/PI489777)SNP_20611 | 1267 | T | C | 8  | 12 | -- | --          |
|            | Ca(ICCV2/PI489777)SNP_20612 | 1327 | G | A | 9  | 12 | -- | --          |
|            | Ca(ICCV2/PI489777)SNP_20613 | 1874 | C | T | 15 | 8  | -- | --          |
|            | Ca(ICCV2/PI489777)SNP_20614 | 1891 | A | T | 12 | 8  | -- | --          |
|            | Ca(ICCV2/PI489777)SNP_20615 | 1897 | G | T | 13 | 8  | -- | --          |
| CakTC38118 | Ca(ICCV2/PI489777)SNP_20616 | 117  | C | T | 3  | 4  | -- | --          |
| CakTC28185 | Ca(ICCV2/PI489777)SNP_20617 | 974  | G | A | 26 | 4  | -- | MYB-related |
|            | Ca(ICCV2/PI489777)SNP_20618 | 1157 | G | A | 16 | 3  | -- | MYB-related |
|            | Ca(ICCV2/PI489777)SNP_20619 | 3245 | A | G | 12 | 3  | -- | MYB-related |
| CakTC28859 | Ca(ICCV2/PI489777)SNP_20620 | 305  | C | G | 4  | 3  | -- | --          |
|            | Ca(ICCV2/PI489777)SNP_20621 | 519  | A | T | 3  | 5  | -- | --          |
|            | Ca(ICCV2/PI489777)SNP_20622 | 1109 | A | T | 7  | 8  | -- | --          |
|            | Ca(ICCV2/PI489777)SNP_20623 | 1145 | A | T | 7  | 10 | -- | --          |
|            | Ca(ICCV2/PI489777)SNP_20624 | 1229 | A | G | 5  | 4  | -- | --          |
|            | Ca(ICCV2/PI489777)SNP_20625 | 1238 | T | C | 6  | 6  | -- | --          |
| CakTC32670 | Ca(ICCV2/PI489777)SNP_20626 | 256  | T | C | 10 | 4  | -- | --          |
|            | Ca(ICCV2/PI489777)SNP_20627 | 288  | G | T | 10 | 5  | -- | --          |
|            | Ca(ICCV2/PI489777)SNP_20628 | 352  | T | C | 11 | 5  | -- | --          |
|            | Ca(ICCV2/PI489777)SNP_20629 | 362  | T | A | 11 | 4  | -- | --          |
|            | Ca(ICCV2/PI489777)SNP_20630 | 684  | G | A | 20 | 4  | -- | --          |
|            | Ca(ICCV2/PI489777)SNP_20631 | 1107 | G | T | 13 | 9  | -- | --          |
|            | Ca(ICCV2/PI489777)SNP_20632 | 1842 | C | T | 16 | 11 | -- | --          |
|            | Ca(ICCV2/PI489777)SNP_20633 | 2200 | G | A | 13 | 7  | -- | --          |
|            | Ca(ICCV2/PI489777)SNP_20634 | 2226 | A | G | 13 | 4  | -- | --          |
| CakTC38332 | Ca(ICCV2/PI489777)SNP_20635 | 191  | T | G | 13 | 11 | -- | --          |
| CakTC41033 | Ca(ICCV2/PI489777)SNP_20636 | 1036 | A | G | 14 | 4  | -- | --          |
|            | Ca(ICCV2/PI489777)SNP_20637 | 1349 | G | C | 9  | 4  | -- | --          |
|            | Ca(ICCV2/PI489777)SNP_20638 | 1493 | A | T | 11 | 6  | -- | --          |
|            | Ca(ICCV2/PI489777)SNP_20639 | 1519 | G | C | 7  | 6  | -- | --          |
|            | Ca(ICCV2/PI489777)SNP_20640 | 1534 | A | C | 5  | 9  | -- | --          |
| CakTC39499 | Ca(ICCV2/PI489777)SNP_20641 | 258  | T | C | 7  | 4  | -- | --          |

|            |                            |      |   |   |    |    |           |       |
|------------|----------------------------|------|---|---|----|----|-----------|-------|
|            | Ca(ICC2/PI489777)SNP_20642 | 352  | T | C | 12 | 6  | --        | --    |
|            | Ca(ICC2/PI489777)SNP_20643 | 370  | A | G | 12 | 6  | --        | --    |
|            | Ca(ICC2/PI489777)SNP_20644 | 379  | A | G | 12 | 6  | --        | --    |
|            | Ca(ICC2/PI489777)SNP_20645 | 1060 | A | T | 18 | 3  | --        | --    |
| CakTC29618 | Ca(ICC2/PI489777)SNP_20646 | 499  | T | C | 18 | 13 | --        | --    |
|            | Ca(ICC2/PI489777)SNP_20647 | 1434 | T | C | 4  | 3  | --        | --    |
|            | Ca(ICC2/PI489777)SNP_20648 | 1998 | A | C | 8  | 4  | --        | --    |
|            | Ca(ICC2/PI489777)SNP_20649 | 2058 | A | C | 6  | 4  | --        | --    |
|            | Ca(ICC2/PI489777)SNP_20650 | 2085 | C | G | 5  | 4  | --        | --    |
|            | Ca(ICC2/PI489777)SNP_20651 | 2112 | T | C | 6  | 4  | --        | --    |
| CakTC42847 | Ca(ICC2/PI489777)SNP_20652 | 266  | C | T | 5  | 3  | --        | --    |
|            | Ca(ICC2/PI489777)SNP_20653 | 436  | C | T | 13 | 10 | --        | --    |
|            | Ca(ICC2/PI489777)SNP_20654 | 873  | G | A | 6  | 6  | --        | --    |
|            | Ca(ICC2/PI489777)SNP_20655 | 1098 | A | G | 4  | 4  | --        | --    |
|            | Ca(ICC2/PI489777)SNP_20656 | 1651 | T | G | 3  | 11 | --        | --    |
| CakTC41802 | Ca(ICC2/PI489777)SNP_20657 | 646  | C | G | 8  | 12 | --        | --    |
| CakTC37533 | Ca(ICC2/PI489777)SNP_20658 | 696  | T | C | 28 | 11 | Young_pod | --    |
| CakTC41810 | Ca(ICC2/PI489777)SNP_20659 | 81   | A | C | 10 | 3  | --        | --    |
|            | Ca(ICC2/PI489777)SNP_20660 | 644  | A | T | 5  | 5  | --        | --    |
| CakTC24169 | Ca(ICC2/PI489777)SNP_20661 | 937  | A | T | 3  | 3  | --        | --    |
| CakTC31682 | Ca(ICC2/PI489777)SNP_20662 | 213  | G | C | 7  | 5  | --        | ARR-B |
|            | Ca(ICC2/PI489777)SNP_20663 | 567  | A | G | 12 | 13 | --        | ARR-B |
|            | Ca(ICC2/PI489777)SNP_20664 | 1383 | C | T | 15 | 10 | --        | ARR-B |
| CakTC05127 | Ca(ICC2/PI489777)SNP_20665 | 459  | A | T | 4  | 3  | --        | --    |
|            | Ca(ICC2/PI489777)SNP_20666 | 666  | T | C | 4  | 3  | --        | --    |
| CakTC24119 | Ca(ICC2/PI489777)SNP_20667 | 168  | T | C | 22 | 6  | Shoot     | --    |
| CakTC39744 | Ca(ICC2/PI489777)SNP_20668 | 447  | A | G | 9  | 9  | --        | --    |
|            | Ca(ICC2/PI489777)SNP_20669 | 1016 | T | C | 17 | 6  | --        | --    |
|            | Ca(ICC2/PI489777)SNP_20670 | 1261 | G | T | 16 | 11 | --        | --    |
|            | Ca(ICC2/PI489777)SNP_20671 | 1351 | A | T | 15 | 9  | --        | --    |
| CakTC38683 | Ca(ICC2/PI489777)SNP_20672 | 362  | C | T | 17 | 11 | --        | --    |
|            | Ca(ICC2/PI489777)SNP_20673 | 395  | G | A | 14 | 10 | --        | --    |
|            | Ca(ICC2/PI489777)SNP_20674 | 406  | T | C | 16 | 11 | --        | --    |
|            | Ca(ICC2/PI489777)SNP_20675 | 543  | G | A | 14 | 7  | --        | --    |
|            | Ca(ICC2/PI489777)SNP_20676 | 563  | C | G | 13 | 7  | --        | --    |
| CakTC06703 | Ca(ICC2/PI489777)SNP_20677 | 476  | C | A | 9  | 5  | --        | --    |
|            | Ca(ICC2/PI489777)SNP_20678 | 576  | A | G | 6  | 5  | --        | --    |
|            | Ca(ICC2/PI489777)SNP_20679 | 786  | A | C | 8  | 5  | --        | --    |
| CakTC38422 | Ca(ICC2/PI489777)SNP_20680 | 377  | C | A | 54 | 85 | --        | --    |
|            | Ca(ICC2/PI489777)SNP_20681 | 1045 | A | G | 3  | 12 | --        | --    |
|            | Ca(ICC2/PI489777)SNP_20682 | 1054 | T | G | 3  | 13 | --        | --    |
| CakTC00672 | Ca(ICC2/PI489777)SNP_20683 | 1591 | G | C | 4  | 3  | --        | --    |
| CakTC39024 | Ca(ICC2/PI489777)SNP_20684 | 487  | G | C | 6  | 6  | --        | --    |
| CakTC24344 | Ca(ICC2/PI489777)SNP_20685 | 420  | T | A | 9  | 4  | --        | --    |
| CakTC26539 | Ca(ICC2/PI489777)SNP_20686 | 74   | T | C | 12 | 4  | --        | --    |
|            | Ca(ICC2/PI489777)SNP_20687 | 86   | A | T | 13 | 4  | --        | --    |
|            | Ca(ICC2/PI489777)SNP_20688 | 1244 | T | C | 8  | 3  | --        | --    |
| CakTC29490 | Ca(ICC2/PI489777)SNP_20689 | 1637 | T | C | 3  | 3  | --        | --    |
| CakTC28547 | Ca(ICC2/PI489777)SNP_20690 | 435  | A | G | 11 | 6  | --        | --    |
|            | Ca(ICC2/PI489777)SNP_20691 | 886  | T | G | 6  | 6  | --        | --    |
| CakTC27130 | Ca(ICC2/PI489777)SNP_20692 | 287  | T | C | 14 | 5  | --        | --    |
| CakTC15604 | Ca(ICC2/PI489777)SNP_20693 | 537  | A | G | 6  | 3  | --        | --    |
| CakTC26693 | Ca(ICC2/PI489777)SNP_20694 | 169  | G | T | 5  | 10 | --        | --    |
|            | Ca(ICC2/PI489777)SNP_20695 | 417  | A | C | 59 | 26 | --        | --    |
|            | Ca(ICC2/PI489777)SNP_20696 | 734  | T | C | 26 | 7  | --        | --    |
|            | Ca(ICC2/PI489777)SNP_20697 | 750  | C | T | 24 | 9  | --        | --    |
|            | Ca(ICC2/PI489777)SNP_20698 | 768  | C | A | 25 | 11 | --        | --    |
|            | Ca(ICC2/PI489777)SNP_20699 | 819  | C | T | 21 | 14 | --        | --    |
|            | Ca(ICC2/PI489777)SNP_20700 | 822  | G | C | 23 | 16 | --        | --    |
|            | Ca(ICC2/PI489777)SNP_20701 | 1500 | C | A | 29 | 12 | --        | --    |
| CakTC28213 | Ca(ICC2/PI489777)SNP_20702 | 206  | C | T | 18 | 4  | --        | --    |
|            | Ca(ICC2/PI489777)SNP_20703 | 243  | T | C | 19 | 3  | --        | --    |
|            | Ca(ICC2/PI489777)SNP_20704 | 428  | A | G | 22 | 7  | --        | --    |
|            | Ca(ICC2/PI489777)SNP_20705 | 496  | C | T | 22 | 7  | --        | --    |
|            | Ca(ICC2/PI489777)SNP_20706 | 767  | A | G | 10 | 7  | --        | --    |
|            | Ca(ICC2/PI489777)SNP_20707 | 866  | T | C | 10 | 10 | --        | --    |
|            | Ca(ICC2/PI489777)SNP_20708 | 1208 | T | C | 13 | 7  | --        | --    |
| CakTC30385 | Ca(ICC2/PI489777)SNP_20709 | 53   | T | A | 4  | 3  | --        | --    |
|            | Ca(ICC2/PI489777)SNP_20710 | 82   | A | G | 5  | 5  | --        | --    |
|            | Ca(ICC2/PI489777)SNP_20711 | 140  | C | G | 5  | 3  | --        | --    |
|            | Ca(ICC2/PI489777)SNP_20712 | 167  | G | A | 5  | 4  | --        | --    |
|            | Ca(ICC2/PI489777)SNP_20713 | 678  | C | T | 4  | 4  | --        | --    |
|            | Ca(ICC2/PI489777)SNP_20714 | 679  | T | A | 4  | 4  | --        | --    |
|            | Ca(ICC2/PI489777)SNP_20715 | 747  | C | T | 7  | 5  | --        | --    |



|            |                             |      |   |   |    |    |        |              |
|------------|-----------------------------|------|---|---|----|----|--------|--------------|
|            | Ca(ICCV2/PI489777)SNP_20716 | 760  | G | T | 7  | 3  | --     | --           |
|            | Ca(ICCV2/PI489777)SNP_20717 | 762  | T | A | 7  | 5  | --     | --           |
|            | Ca(ICCV2/PI489777)SNP_20718 | 830  | A | T | 10 | 6  | --     | --           |
|            | Ca(ICCV2/PI489777)SNP_20719 | 917  | G | A | 10 | 6  | --     | --           |
|            | Ca(ICCV2/PI489777)SNP_20720 | 988  | C | T | 10 | 6  | --     | --           |
|            | Ca(ICCV2/PI489777)SNP_20721 | 1062 | A | T | 8  | 9  | --     | --           |
|            | Ca(ICCV2/PI489777)SNP_20722 | 1067 | C | T | 8  | 9  | --     | --           |
|            | Ca(ICCV2/PI489777)SNP_20723 | 1089 | C | T | 6  | 7  | --     | --           |
|            | Ca(ICCV2/PI489777)SNP_20724 | 1092 | A | T | 6  | 8  | --     | --           |
|            | Ca(ICCV2/PI489777)SNP_20725 | 1099 | C | T | 5  | 7  | --     | --           |
|            | Ca(ICCV2/PI489777)SNP_20726 | 1105 | T | C | 5  | 6  | --     | --           |
|            | Ca(ICCV2/PI489777)SNP_20727 | 1117 | A | C | 5  | 7  | --     | --           |
|            | Ca(ICCV2/PI489777)SNP_20728 | 1118 | T | G | 5  | 7  | --     | --           |
|            | Ca(ICCV2/PI489777)SNP_20729 | 1155 | C | T | 5  | 7  | --     | --           |
|            | Ca(ICCV2/PI489777)SNP_20730 | 1161 | G | T | 5  | 7  | --     | --           |
|            | Ca(ICCV2/PI489777)SNP_20731 | 1289 | T | A | 5  | 7  | --     | --           |
|            | Ca(ICCV2/PI489777)SNP_20732 | 1306 | C | T | 4  | 7  | --     | --           |
|            | Ca(ICCV2/PI489777)SNP_20733 | 1320 | T | A | 3  | 7  | --     | --           |
| CakTC35358 | Ca(ICCV2/PI489777)SNP_20734 | 678  | T | C | 15 | 5  | --     | --           |
|            | Ca(ICCV2/PI489777)SNP_20735 | 688  | C | G | 14 | 4  | --     | --           |
|            | Ca(ICCV2/PI489777)SNP_20736 | 767  | T | C | 9  | 4  | --     | --           |
|            | Ca(ICCV2/PI489777)SNP_20737 | 1130 | C | T | 14 | 5  | --     | --           |
|            | Ca(ICCV2/PI489777)SNP_20738 | 1688 | T | C | 6  | 10 | --     | --           |
|            | Ca(ICCV2/PI489777)SNP_20739 | 1825 | C | T | 3  | 9  | --     | --           |
|            | Ca(ICCV2/PI489777)SNP_20740 | 1943 | G | A | 5  | 15 | --     | --           |
|            | Ca(ICCV2/PI489777)SNP_20741 | 1957 | G | A | 6  | 15 | --     | --           |
|            | Ca(ICCV2/PI489777)SNP_20742 | 2055 | G | T | 5  | 20 | --     | --           |
|            | Ca(ICCV2/PI489777)SNP_20743 | 2079 | G | A | 7  | 20 | --     | --           |
|            | Ca(ICCV2/PI489777)SNP_20744 | 2412 | C | A | 8  | 8  | --     | --           |
|            | Ca(ICCV2/PI489777)SNP_20745 | 2858 | C | T | 5  | 6  | --     | --           |
|            | Ca(ICCV2/PI489777)SNP_20746 | 3012 | G | A | 12 | 4  | --     | --           |
|            | Ca(ICCV2/PI489777)SNP_20747 | 3093 | C | T | 11 | 4  | --     | --           |
|            | Ca(ICCV2/PI489777)SNP_20748 | 3293 | T | G | 8  | 11 | --     | --           |
|            | Ca(ICCV2/PI489777)SNP_20749 | 3375 | A | G | 7  | 10 | --     | --           |
|            | Ca(ICCV2/PI489777)SNP_20750 | 3929 | G | A | 12 | 13 | --     | --           |
|            | Ca(ICCV2/PI489777)SNP_20751 | 4282 | T | C | 5  | 13 | --     | --           |
| CakTC38456 | Ca(ICCV2/PI489777)SNP_20752 | 257  | T | A | 20 | 3  | --     | --           |
|            | Ca(ICCV2/PI489777)SNP_20753 | 561  | A | G | 14 | 3  | --     | --           |
|            | Ca(ICCV2/PI489777)SNP_20754 | 625  | A | G | 14 | 4  | --     | --           |
|            | Ca(ICCV2/PI489777)SNP_20755 | 761  | C | A | 9  | 4  | --     | --           |
|            | Ca(ICCV2/PI489777)SNP_20756 | 852  | C | T | 13 | 6  | --     | --           |
|            | Ca(ICCV2/PI489777)SNP_20757 | 1100 | G | A | 15 | 6  | --     | --           |
| CakTC10483 | Ca(ICCV2/PI489777)SNP_20758 | 866  | T | A | 22 | 14 | --     | C2C2-CO-like |
|            | Ca(ICCV2/PI489777)SNP_20759 | 914  | C | T | 23 | 8  | --     | C2C2-CO-like |
|            | Ca(ICCV2/PI489777)SNP_20760 | 1010 | A | G | 20 | 9  | --     | C2C2-CO-like |
| CakTC31301 | Ca(ICCV2/PI489777)SNP_20761 | 861  | C | T | 5  | 6  | --     | --           |
| CakTC41469 | Ca(ICCV2/PI489777)SNP_20762 | 413  | C | T | 9  | 10 | --     | TPR          |
|            | Ca(ICCV2/PI489777)SNP_20763 | 516  | G | A | 9  | 11 | --     | TPR          |
|            | Ca(ICCV2/PI489777)SNP_20764 | 623  | A | G | 9  | 8  | --     | TPR          |
|            | Ca(ICCV2/PI489777)SNP_20765 | 1433 | G | A | 7  | 8  | --     | TPR          |
|            | Ca(ICCV2/PI489777)SNP_20766 | 1628 | T | C | 9  | 9  | --     | TPR          |
|            | Ca(ICCV2/PI489777)SNP_20767 | 1672 | A | G | 11 | 7  | --     | TPR          |
|            | Ca(ICCV2/PI489777)SNP_20768 | 2273 | A | C | 4  | 10 | --     | TPR          |
| CakTC25887 | Ca(ICCV2/PI489777)SNP_20769 | 164  | A | G | 10 | 16 | --     | --           |
|            | Ca(ICCV2/PI489777)SNP_20770 | 898  | C | A | 23 | 20 | --     | --           |
| CakTC32039 | Ca(ICCV2/PI489777)SNP_20771 | 636  | A | G | 35 | 38 | --     | --           |
|            | Ca(ICCV2/PI489777)SNP_20772 | 699  | T | C | 38 | 35 | --     | --           |
|            | Ca(ICCV2/PI489777)SNP_20773 | 969  | T | A | 45 | 31 | --     | --           |
| CakTC33495 | Ca(ICCV2/PI489777)SNP_20774 | 132  | A | C | 8  | 6  | --     | --           |
|            | Ca(ICCV2/PI489777)SNP_20775 | 340  | G | A | 11 | 6  | --     | --           |
|            | Ca(ICCV2/PI489777)SNP_20776 | 389  | T | C | 8  | 6  | --     | --           |
|            | Ca(ICCV2/PI489777)SNP_20777 | 790  | T | C | 4  | 3  | --     | --           |
|            | Ca(ICCV2/PI489777)SNP_20778 | 859  | C | A | 3  | 3  | --     | --           |
|            | Ca(ICCV2/PI489777)SNP_20779 | 1084 | T | C | 6  | 3  | --     | --           |
|            | Ca(ICCV2/PI489777)SNP_20780 | 1258 | T | C | 11 | 9  | --     | --           |
|            | Ca(ICCV2/PI489777)SNP_20781 | 1633 | A | G | 28 | 13 | --     | --           |
|            | Ca(ICCV2/PI489777)SNP_20782 | 1671 | C | T | 24 | 6  | --     | --           |
|            | Ca(ICCV2/PI489777)SNP_20783 | 1678 | C | T | 26 | 13 | --     | --           |
| CakTC10796 | Ca(ICCV2/PI489777)SNP_20784 | 598  | A | G | 3  | 6  | --     | --           |
|            | Ca(ICCV2/PI489777)SNP_20785 | 963  | C | T | 7  | 7  | --     | --           |
|            | Ca(ICCV2/PI489777)SNP_20786 | 988  | C | A | 9  | 7  | --     | --           |
| CakTC42018 | Ca(ICCV2/PI489777)SNP_20787 | 883  | G | A | 5  | 4  | --     | --           |
| CakTC27687 | Ca(ICCV2/PI489777)SNP_20788 | 1217 | C | T | 5  | 3  | Flower | bud          |
|            | Ca(ICCV2/PI489777)SNP_20789 | 1287 | G | A | 6  | 3  | Flower | bud          |

|            |                            |      |   |   |    |    |           |           |
|------------|----------------------------|------|---|---|----|----|-----------|-----------|
|            | Ca(ICC2/PI489777)SNP_20790 | 1366 | C | T | 5  | 3  | Flower    | bud       |
| CakTC23680 | Ca(ICC2/PI489777)SNP_20791 | 1101 | T | C | 22 | 5  | --        | AP2-EREBP |
|            | Ca(ICC2/PI489777)SNP_20792 | 1197 | G | A | 21 | 5  | --        | AP2-EREBP |
| CakTC30363 | Ca(ICC2/PI489777)SNP_20793 | 81   | A | T | 10 | 14 | --        | --        |
|            | Ca(ICC2/PI489777)SNP_20794 | 453  | G | A | 17 | 20 | --        | --        |
|            | Ca(ICC2/PI489777)SNP_20795 | 513  | T | C | 18 | 17 | --        | --        |
| CakTC25616 | Ca(ICC2/PI489777)SNP_20796 | 2080 | G | A | 65 | 92 | --        | --        |
|            | Ca(ICC2/PI489777)SNP_20797 | 3354 | T | C | 43 | 58 | --        | --        |
| CakTC38463 | Ca(ICC2/PI489777)SNP_20798 | 87   | G | C | 8  | 3  | --        | --        |
| CakTC37139 | Ca(ICC2/PI489777)SNP_20799 | 73   | G | A | 8  | 10 | --        | --        |
| CakTC23436 | Ca(ICC2/PI489777)SNP_20800 | 526  | T | C | 6  | 7  | --        | --        |
|            | Ca(ICC2/PI489777)SNP_20801 | 720  | G | A | 8  | 9  | --        | --        |
|            | Ca(ICC2/PI489777)SNP_20802 | 1532 | G | A | 22 | 12 | --        | --        |
|            | Ca(ICC2/PI489777)SNP_20803 | 1846 | A | G | 14 | 19 | --        | --        |
| CakTC25385 | Ca(ICC2/PI489777)SNP_20804 | 1149 | G | A | 18 | 3  | --        | --        |
| CakTC09948 | Ca(ICC2/PI489777)SNP_20805 | 196  | T | C | 8  | 15 | --        | --        |
|            | Ca(ICC2/PI489777)SNP_20806 | 575  | G | C | 3  | 6  | --        | --        |
| CakTC22371 | Ca(ICC2/PI489777)SNP_20807 | 2712 | A | G | 15 | 4  | --        | --        |
| CakTC31615 | Ca(ICC2/PI489777)SNP_20808 | 668  | G | A | 4  | 4  | Young_pod | --        |
| CakTC43370 | Ca(ICC2/PI489777)SNP_20809 | 224  | C | T | 16 | 7  | --        | --        |
| CakTC39307 | Ca(ICC2/PI489777)SNP_20810 | 519  | T | A | 17 | 5  | --        | HB        |
|            | Ca(ICC2/PI489777)SNP_20811 | 969  | T | C | 7  | 4  | --        | HB        |
| CakTC37245 | Ca(ICC2/PI489777)SNP_20812 | 309  | C | A | 5  | 4  | Young_pod | --        |
|            | Ca(ICC2/PI489777)SNP_20813 | 352  | C | T | 5  | 4  | Young_pod | --        |
|            | Ca(ICC2/PI489777)SNP_20814 | 453  | C | T | 6  | 4  | Young_pod | --        |
|            | Ca(ICC2/PI489777)SNP_20815 | 840  | A | G | 5  | 4  | Young_pod | --        |
| CakTC37981 | Ca(ICC2/PI489777)SNP_20816 | 270  | G | A | 15 | 3  | --        | --        |
|            | Ca(ICC2/PI489777)SNP_20817 | 378  | T | C | 16 | 4  | --        | --        |
|            | Ca(ICC2/PI489777)SNP_20818 | 733  | C | T | 16 | 3  | --        | --        |
| CakTC26304 | Ca(ICC2/PI489777)SNP_20819 | 311  | A | G | 4  | 4  | --        | WRKY      |
|            | Ca(ICC2/PI489777)SNP_20820 | 1139 | A | T | 10 | 4  | --        | WRKY      |
|            | Ca(ICC2/PI489777)SNP_20821 | 1275 | G | T | 20 | 13 | --        | WRKY      |
| CakTC29471 | Ca(ICC2/PI489777)SNP_20822 | 831  | T | A | 11 | 3  | --        | --        |
|            | Ca(ICC2/PI489777)SNP_20823 | 1230 | T | C | 10 | 5  | --        | --        |
|            | Ca(ICC2/PI489777)SNP_20824 | 1524 | T | G | 6  | 6  | --        | --        |
|            | Ca(ICC2/PI489777)SNP_20825 | 2172 | T | C | 14 | 4  | --        | --        |
|            | Ca(ICC2/PI489777)SNP_20826 | 2186 | T | C | 15 | 4  | --        | --        |
|            | Ca(ICC2/PI489777)SNP_20827 | 2703 | G | A | 15 | 17 | --        | --        |
|            | Ca(ICC2/PI489777)SNP_20828 | 2715 | G | C | 16 | 18 | --        | --        |
|            | Ca(ICC2/PI489777)SNP_20829 | 2976 | T | C | 10 | 10 | --        | --        |
|            | Ca(ICC2/PI489777)SNP_20830 | 3014 | A | G | 12 | 10 | --        | --        |
|            | Ca(ICC2/PI489777)SNP_20831 | 3023 | C | T | 11 | 8  | --        | --        |
| CakTC41878 | Ca(ICC2/PI489777)SNP_20832 | 427  | A | C | 5  | 4  | --        | --        |
|            | Ca(ICC2/PI489777)SNP_20833 | 1251 | C | T | 11 | 5  | --        | --        |
| CakTC24197 | Ca(ICC2/PI489777)SNP_20834 | 66   | T | A | 12 | 8  | --        | --        |
|            | Ca(ICC2/PI489777)SNP_20835 | 902  | G | A | 65 | 11 | --        | --        |
|            | Ca(ICC2/PI489777)SNP_20836 | 916  | T | C | 65 | 10 | --        | --        |
|            | Ca(ICC2/PI489777)SNP_20837 | 1136 | C | T | 36 | 6  | --        | --        |
| CakTC28820 | Ca(ICC2/PI489777)SNP_20838 | 15   | A | T | 11 | 3  | --        | --        |
|            | Ca(ICC2/PI489777)SNP_20839 | 251  | C | T | 32 | 39 | --        | --        |
|            | Ca(ICC2/PI489777)SNP_20840 | 438  | C | G | 42 | 52 | --        | --        |
|            | Ca(ICC2/PI489777)SNP_20841 | 633  | A | G | 46 | 47 | --        | --        |
|            | Ca(ICC2/PI489777)SNP_20842 | 650  | A | T | 42 | 43 | --        | --        |
|            | Ca(ICC2/PI489777)SNP_20843 | 656  | T | C | 39 | 40 | --        | --        |
|            | Ca(ICC2/PI489777)SNP_20844 | 1492 | C | G | 18 | 23 | --        | --        |
|            | Ca(ICC2/PI489777)SNP_20845 | 1518 | T | A | 18 | 20 | --        | --        |
| CakTC34596 | Ca(ICC2/PI489777)SNP_20846 | 387  | A | G | 4  | 3  | --        | --        |
| CakTC22555 | Ca(ICC2/PI489777)SNP_20847 | 400  | T | C | 22 | 6  | --        | --        |
| CakTC34964 | Ca(ICC2/PI489777)SNP_20848 | 380  | T | G | 5  | 14 | --        | --        |
|            | Ca(ICC2/PI489777)SNP_20849 | 732  | G | T | 12 | 16 | --        | --        |
|            | Ca(ICC2/PI489777)SNP_20850 | 734  | T | A | 12 | 16 | --        | --        |
|            | Ca(ICC2/PI489777)SNP_20851 | 805  | T | G | 14 | 16 | --        | --        |
|            | Ca(ICC2/PI489777)SNP_20852 | 900  | C | T | 8  | 13 | --        | --        |
|            | Ca(ICC2/PI489777)SNP_20853 | 1160 | T | C | 11 | 14 | --        | --        |
|            | Ca(ICC2/PI489777)SNP_20854 | 1311 | C | T | 18 | 13 | --        | --        |
|            | Ca(ICC2/PI489777)SNP_20855 | 1417 | T | G | 19 | 11 | --        | --        |
|            | Ca(ICC2/PI489777)SNP_20856 | 1474 | T | C | 23 | 14 | --        | --        |
|            | Ca(ICC2/PI489777)SNP_20857 | 1604 | A | G | 12 | 13 | --        | --        |
|            | Ca(ICC2/PI489777)SNP_20858 | 1607 | G | A | 18 | 14 | --        | --        |
|            | Ca(ICC2/PI489777)SNP_20859 | 1632 | C | T | 21 | 15 | --        | --        |
|            | Ca(ICC2/PI489777)SNP_20860 | 1637 | C | T | 23 | 13 | --        | --        |
|            | Ca(ICC2/PI489777)SNP_20861 | 1715 | C | A | 26 | 14 | --        | --        |
|            | Ca(ICC2/PI489777)SNP_20862 | 1782 | T | G | 23 | 12 | --        | --        |
|            | Ca(ICC2/PI489777)SNP_20863 | 1928 | G | A | 36 | 21 | --        | --        |

|            |                            |      |   |   |    |    |        |      |
|------------|----------------------------|------|---|---|----|----|--------|------|
|            | Ca(ICC2/PI489777)SNP_20864 | 1968 | A | C | 24 | 17 | --     | --   |
|            | Ca(ICC2/PI489777)SNP_20865 | 2349 | G | T | 9  | 21 | --     | --   |
|            | Ca(ICC2/PI489777)SNP_20866 | 2379 | T | C | 9  | 12 | --     | --   |
|            | Ca(ICC2/PI489777)SNP_20867 | 2598 | A | G | 10 | 20 | --     | --   |
|            | Ca(ICC2/PI489777)SNP_20868 | 2767 | A | T | 6  | 14 | --     | --   |
| CakTC24872 | Ca(ICC2/PI489777)SNP_20869 | 1333 | T | C | 88 | 39 | --     | --   |
| CakTC26985 | Ca(ICC2/PI489777)SNP_20870 | 836  | G | T | 12 | 5  | --     | --   |
|            | Ca(ICC2/PI489777)SNP_20871 | 1277 | G | T | 4  | 5  | --     | --   |
| CakTC10657 | Ca(ICC2/PI489777)SNP_20872 | 453  | G | A | 9  | 4  | --     | --   |
| CakTC29545 | Ca(ICC2/PI489777)SNP_20873 | 876  | T | A | 3  | 7  | --     | --   |
|            | Ca(ICC2/PI489777)SNP_20874 | 969  | T | A | 3  | 5  | --     | --   |
|            | Ca(ICC2/PI489777)SNP_20875 | 2163 | T | A | 3  | 5  | --     | --   |
|            | Ca(ICC2/PI489777)SNP_20876 | 2381 | T | C | 3  | 5  | --     | --   |
| CakTC31376 | Ca(ICC2/PI489777)SNP_20877 | 1248 | T | C | 3  | 3  | Root   | GNAT |
| CakTC23422 | Ca(ICC2/PI489777)SNP_20878 | 82   | T | C | 41 | 27 | --     | --   |
|            | Ca(ICC2/PI489777)SNP_20879 | 128  | T | C | 87 | 64 | --     | --   |
|            | Ca(ICC2/PI489777)SNP_20880 | 135  | C | T | 90 | 65 | --     | --   |
| CakTC40238 | Ca(ICC2/PI489777)SNP_20881 | 464  | G | A | 7  | 15 | --     | --   |
|            | Ca(ICC2/PI489777)SNP_20882 | 487  | C | G | 6  | 14 | --     | --   |
| CakTC29830 | Ca(ICC2/PI489777)SNP_20883 | 158  | G | A | 13 | 11 | --     | --   |
|            | Ca(ICC2/PI489777)SNP_20884 | 644  | G | A | 70 | 74 | --     | --   |
|            | Ca(ICC2/PI489777)SNP_20885 | 794  | T | C | 35 | 39 | --     | --   |
|            | Ca(ICC2/PI489777)SNP_20886 | 989  | T | A | 45 | 40 | --     | --   |
|            | Ca(ICC2/PI489777)SNP_20887 | 1005 | C | T | 46 | 36 | --     | --   |
|            | Ca(ICC2/PI489777)SNP_20888 | 1092 | T | G | 21 | 6  | --     | --   |
| CakTC41219 | Ca(ICC2/PI489777)SNP_20889 | 118  | G | A | 6  | 12 | --     | --   |
|            | Ca(ICC2/PI489777)SNP_20890 | 856  | A | G | 35 | 19 | --     | --   |
|            | Ca(ICC2/PI489777)SNP_20891 | 2284 | A | G | 17 | 8  | --     | --   |
| CakTC23414 | Ca(ICC2/PI489777)SNP_20892 | 844  | G | T | 3  | 3  | --     | --   |
| CakTC22782 | Ca(ICC2/PI489777)SNP_20893 | 142  | G | A | 12 | 3  | --     | --   |
|            | Ca(ICC2/PI489777)SNP_20894 | 682  | C | T | 52 | 10 | --     | --   |
|            | Ca(ICC2/PI489777)SNP_20895 | 775  | T | G | 56 | 10 | --     | --   |
|            | Ca(ICC2/PI489777)SNP_20896 | 829  | C | T | 44 | 10 | --     | --   |
| CakTC10038 | Ca(ICC2/PI489777)SNP_20897 | 922  | C | T | 3  | 3  | --     | --   |
|            | Ca(ICC2/PI489777)SNP_20898 | 1004 | C | T | 3  | 3  | --     | --   |
|            | Ca(ICC2/PI489777)SNP_20899 | 1752 | G | A | 4  | 6  | --     | --   |
|            | Ca(ICC2/PI489777)SNP_20900 | 1973 | T | C | 4  | 7  | --     | --   |
| CakTC42133 | Ca(ICC2/PI489777)SNP_20901 | 442  | G | A | 4  | 13 | --     | --   |
|            | Ca(ICC2/PI489777)SNP_20902 | 573  | G | A | 5  | 11 | --     | --   |
|            | Ca(ICC2/PI489777)SNP_20903 | 696  | G | T | 5  | 8  | --     | --   |
| CakTC39360 | Ca(ICC2/PI489777)SNP_20904 | 320  | G | T | 5  | 5  | --     | --   |
|            | Ca(ICC2/PI489777)SNP_20905 | 1069 | G | C | 5  | 11 | --     | --   |
|            | Ca(ICC2/PI489777)SNP_20906 | 1126 | T | C | 3  | 11 | --     | --   |
|            | Ca(ICC2/PI489777)SNP_20907 | 1316 | C | T | 4  | 5  | --     | --   |
|            | Ca(ICC2/PI489777)SNP_20908 | 1355 | T | C | 3  | 5  | --     | --   |
|            | Ca(ICC2/PI489777)SNP_20909 | 1439 | C | T | 3  | 3  | --     | --   |
| CakTC41822 | Ca(ICC2/PI489777)SNP_20910 | 729  | G | T | 29 | 21 | --     | --   |
| CakTC39086 | Ca(ICC2/PI489777)SNP_20911 | 591  | T | C | 9  | 21 | --     | --   |
|            | Ca(ICC2/PI489777)SNP_20912 | 982  | C | A | 14 | 17 | --     | --   |
|            | Ca(ICC2/PI489777)SNP_20913 | 1114 | G | A | 29 | 19 | --     | --   |
|            | Ca(ICC2/PI489777)SNP_20914 | 1180 | C | T | 30 | 18 | --     | --   |
|            | Ca(ICC2/PI489777)SNP_20915 | 1294 | G | A | 30 | 23 | --     | --   |
|            | Ca(ICC2/PI489777)SNP_20916 | 1538 | C | G | 5  | 4  | --     | --   |
| CakTC32650 | Ca(ICC2/PI489777)SNP_20917 | 391  | G | A | 3  | 3  | --     | --   |
|            | Ca(ICC2/PI489777)SNP_20918 | 650  | T | C | 9  | 11 | --     | --   |
|            | Ca(ICC2/PI489777)SNP_20919 | 815  | T | C | 8  | 7  | --     | --   |
|            | Ca(ICC2/PI489777)SNP_20920 | 880  | A | C | 8  | 6  | --     | --   |
| CakTC42871 | Ca(ICC2/PI489777)SNP_20921 | 521  | G | T | 5  | 4  | --     | --   |
|            | Ca(ICC2/PI489777)SNP_20922 | 741  | A | G | 8  | 10 | --     | --   |
|            | Ca(ICC2/PI489777)SNP_20923 | 1119 | A | G | 11 | 20 | --     | --   |
|            | Ca(ICC2/PI489777)SNP_20924 | 1430 | T | G | 4  | 20 | --     | --   |
|            | Ca(ICC2/PI489777)SNP_20925 | 1447 | G | A | 4  | 19 | --     | --   |
|            | Ca(ICC2/PI489777)SNP_20926 | 1453 | T | C | 4  | 18 | --     | --   |
| CakTC41915 | Ca(ICC2/PI489777)SNP_20927 | 48   | C | T | 18 | 5  | --     | --   |
|            | Ca(ICC2/PI489777)SNP_20928 | 323  | T | C | 30 | 5  | --     | --   |
|            | Ca(ICC2/PI489777)SNP_20929 | 332  | T | C | 34 | 7  | --     | --   |
|            | Ca(ICC2/PI489777)SNP_20930 | 696  | G | A | 26 | 8  | --     | --   |
|            | Ca(ICC2/PI489777)SNP_20931 | 860  | C | T | 20 | 4  | --     | --   |
|            | Ca(ICC2/PI489777)SNP_20932 | 899  | G | A | 14 | 4  | --     | --   |
| CakTC30637 | Ca(ICC2/PI489777)SNP_20933 | 3264 | A | G | 3  | 3  | --     | --   |
| CakTC22239 | Ca(ICC2/PI489777)SNP_20934 | 255  | G | C | 5  | 8  | Flower | bud  |
|            | Ca(ICC2/PI489777)SNP_20935 | 511  | A | G | 8  | 10 | Flower | bud  |
|            | Ca(ICC2/PI489777)SNP_20936 | 994  | C | G | 53 | 6  | Flower | bud  |
|            | Ca(ICC2/PI489777)SNP_20937 | 1001 | A | T | 52 | 7  | Flower | bud  |

|            |                            |      |   |   |     |    |           |        |
|------------|----------------------------|------|---|---|-----|----|-----------|--------|
|            | Ca(ICC2/PI489777)SNP_20938 | 1062 | A | G | 77  | 14 | Flower    | bud    |
|            | Ca(ICC2/PI489777)SNP_20939 | 1155 | T | G | 100 | 16 | Flower    | bud    |
|            | Ca(ICC2/PI489777)SNP_20940 | 1197 | T | A | 106 | 17 | Flower    | bud    |
| CakTC29454 | Ca(ICC2/PI489777)SNP_20941 | 794  | A | G | 5   | 6  | Flower    | bud    |
| CakTC38958 | Ca(ICC2/PI489777)SNP_20942 | 77   | T | C | 18  | 10 | --        | --     |
|            | Ca(ICC2/PI489777)SNP_20943 | 196  | T | C | 20  | 12 | --        | --     |
|            | Ca(ICC2/PI489777)SNP_20944 | 258  | G | T | 22  | 18 | --        | --     |
| CakTC24925 | Ca(ICC2/PI489777)SNP_20945 | 68   | G | A | 19  | 6  | Young_pod | --     |
|            | Ca(ICC2/PI489777)SNP_20946 | 186  | G | A | 33  | 13 | Young_pod | --     |
|            | Ca(ICC2/PI489777)SNP_20947 | 732  | T | A | 44  | 24 | Young_pod | --     |
| CakTC36293 | Ca(ICC2/PI489777)SNP_20948 | 268  | C | T | 3   | 8  | --        | --     |
| CakTC35294 | Ca(ICC2/PI489777)SNP_20949 | 191  | G | C | 4   | 5  | --        | --     |
|            | Ca(ICC2/PI489777)SNP_20950 | 285  | C | A | 3   | 5  | --        | --     |
|            | Ca(ICC2/PI489777)SNP_20951 | 383  | G | C | 4   | 8  | --        | --     |
|            | Ca(ICC2/PI489777)SNP_20952 | 1579 | G | A | 7   | 3  | --        | --     |
|            | Ca(ICC2/PI489777)SNP_20953 | 1893 | G | A | 7   | 6  | --        | --     |
|            | Ca(ICC2/PI489777)SNP_20954 | 2474 | A | T | 7   | 9  | --        | --     |
|            | Ca(ICC2/PI489777)SNP_20955 | 2556 | T | G | 4   | 6  | --        | --     |
|            | Ca(ICC2/PI489777)SNP_20956 | 2688 | T | C | 3   | 3  | --        | --     |
|            | Ca(ICC2/PI489777)SNP_20957 | 2941 | A | G | 6   | 7  | --        | --     |
| CakTC38195 | Ca(ICC2/PI489777)SNP_20958 | 486  | C | T | 15  | 16 | --        | --     |
|            | Ca(ICC2/PI489777)SNP_20959 | 991  | G | T | 3   | 14 | --        | --     |
| CakTC00543 | Ca(ICC2/PI489777)SNP_20960 | 702  | T | G | 4   | 3  | --        | E2F-DP |
| CakTC05291 | Ca(ICC2/PI489777)SNP_20961 | 217  | C | G | 3   | 8  | --        | MADS   |
|            | Ca(ICC2/PI489777)SNP_20962 | 440  | G | C | 3   | 3  | --        | MADS   |
| CakTC26998 | Ca(ICC2/PI489777)SNP_20963 | 181  | C | T | 49  | 29 | --        | HMG    |
|            | Ca(ICC2/PI489777)SNP_20964 | 566  | T | C | 35  | 31 | --        | HMG    |
|            | Ca(ICC2/PI489777)SNP_20965 | 596  | G | T | 31  | 24 | --        | HMG    |
|            | Ca(ICC2/PI489777)SNP_20966 | 697  | G | C | 20  | 23 | --        | HMG    |
|            | Ca(ICC2/PI489777)SNP_20967 | 719  | G | T | 28  | 21 | --        | HMG    |
| CakTC27042 | Ca(ICC2/PI489777)SNP_20968 | 606  | G | A | 5   | 4  | --        | --     |
|            | Ca(ICC2/PI489777)SNP_20969 | 1206 | T | C | 4   | 3  | --        | --     |
|            | Ca(ICC2/PI489777)SNP_20970 | 1236 | A | G | 6   | 5  | --        | --     |
| CakTC40899 | Ca(ICC2/PI489777)SNP_20971 | 844  | T | C | 24  | 16 | --        | --     |
|            | Ca(ICC2/PI489777)SNP_20972 | 873  | G | A | 22  | 17 | --        | --     |
|            | Ca(ICC2/PI489777)SNP_20973 | 1218 | C | T | 17  | 26 | --        | --     |
| CakTC26223 | Ca(ICC2/PI489777)SNP_20974 | 148  | A | G | 5   | 3  | --        | --     |
|            | Ca(ICC2/PI489777)SNP_20975 | 2127 | G | A | 9   | 3  | --        | --     |
|            | Ca(ICC2/PI489777)SNP_20976 | 3120 | A | C | 5   | 4  | --        | --     |
| CakTC25253 | Ca(ICC2/PI489777)SNP_20977 | 332  | A | G | 5   | 3  | Flower    | bud    |
|            | Ca(ICC2/PI489777)SNP_20978 | 913  | C | T | 21  | 3  | Flower    | bud    |
|            | Ca(ICC2/PI489777)SNP_20979 | 1138 | A | G | 11  | 7  | Flower    | bud    |
|            | Ca(ICC2/PI489777)SNP_20980 | 1246 | G | A | 6   | 7  | Flower    | bud    |
|            | Ca(ICC2/PI489777)SNP_20981 | 2737 | T | A | 13  | 6  | Flower    | bud    |
|            | Ca(ICC2/PI489777)SNP_20982 | 2854 | A | G | 13  | 5  | Flower    | bud    |
| CakTC41606 | Ca(ICC2/PI489777)SNP_20983 | 854  | G | A | 4   | 6  | --        | --     |
|            | Ca(ICC2/PI489777)SNP_20984 | 869  | C | T | 4   | 6  | --        | --     |
|            | Ca(ICC2/PI489777)SNP_20985 | 1971 | G | A | 8   | 5  | --        | --     |
| CakTC24132 | Ca(ICC2/PI489777)SNP_20986 | 1958 | C | T | 4   | 5  | --        | --     |
|            | Ca(ICC2/PI489777)SNP_20987 | 2041 | A | G | 5   | 3  | --        | --     |
|            | Ca(ICC2/PI489777)SNP_20988 | 2306 | A | T | 6   | 3  | --        | --     |
|            | Ca(ICC2/PI489777)SNP_20989 | 2894 | C | T | 10  | 4  | --        | --     |
| CakTC41525 | Ca(ICC2/PI489777)SNP_20990 | 830  | A | C | 10  | 11 | --        | --     |
| CakTC37483 | Ca(ICC2/PI489777)SNP_20991 | 346  | A | G | 10  | 5  | --        | GNAT   |
|            | Ca(ICC2/PI489777)SNP_20992 | 1027 | G | A | 3   | 8  | --        | GNAT   |
| CakTC42270 | Ca(ICC2/PI489777)SNP_20993 | 71   | C | T | 8   | 5  | --        | --     |
| CakTC39375 | Ca(ICC2/PI489777)SNP_20994 | 353  | A | G | 14  | 7  | --        | --     |
|            | Ca(ICC2/PI489777)SNP_20995 | 450  | T | C | 8   | 9  | --        | --     |
|            | Ca(ICC2/PI489777)SNP_20996 | 521  | A | G | 6   | 9  | --        | --     |
| CakTC33982 | Ca(ICC2/PI489777)SNP_20997 | 973  | A | T | 10  | 3  | --        | --     |
|            | Ca(ICC2/PI489777)SNP_20998 | 1009 | A | G | 6   | 5  | --        | --     |
|            | Ca(ICC2/PI489777)SNP_20999 | 1627 | A | C | 12  | 5  | --        | --     |
|            | Ca(ICC2/PI489777)SNP_21000 | 1840 | A | G | 3   | 4  | --        | --     |
|            | Ca(ICC2/PI489777)SNP_21001 | 1879 | C | T | 5   | 3  | --        | --     |
| CakTC25090 | Ca(ICC2/PI489777)SNP_21002 | 731  | A | G | 11  | 7  | --        | --     |
|            | Ca(ICC2/PI489777)SNP_21003 | 800  | C | T | 25  | 8  | --        | --     |
|            | Ca(ICC2/PI489777)SNP_21004 | 1064 | G | A | 29  | 13 | --        | --     |
|            | Ca(ICC2/PI489777)SNP_21005 | 1368 | C | T | 20  | 5  | --        | --     |
|            | Ca(ICC2/PI489777)SNP_21006 | 1651 | C | G | 37  | 14 | --        | --     |
|            | Ca(ICC2/PI489777)SNP_21007 | 1981 | C | G | 45  | 17 | --        | --     |
|            | Ca(ICC2/PI489777)SNP_21008 | 2174 | C | T | 41  | 15 | --        | --     |
| CakTC43296 | Ca(ICC2/PI489777)SNP_21009 | 434  | T | G | 21  | 9  | --        | --     |
|            | Ca(ICC2/PI489777)SNP_21010 | 559  | T | C | 22  | 14 | --        | --     |
|            | Ca(ICC2/PI489777)SNP_21011 | 655  | T | A | 22  | 12 | --        | --     |

|            |                            |      |   |   |    |    |        |      |
|------------|----------------------------|------|---|---|----|----|--------|------|
|            | Ca(ICC2/PI489777)SNP_21012 | 677  | C | T | 22 | 10 | --     | --   |
|            | Ca(ICC2/PI489777)SNP_21013 | 793  | T | C | 23 | 6  | --     | --   |
| CakTC37545 | Ca(ICC2/PI489777)SNP_21014 | 722  | G | T | 57 | 26 | --     | --   |
|            | Ca(ICC2/PI489777)SNP_21015 | 793  | C | T | 49 | 15 | --     | --   |
|            | Ca(ICC2/PI489777)SNP_21016 | 1225 | G | A | 12 | 18 | --     | --   |
| CakTC28651 | Ca(ICC2/PI489777)SNP_21017 | 1457 | C | T | 5  | 7  | --     | --   |
| CakTC32487 | Ca(ICC2/PI489777)SNP_21018 | 534  | C | T | 4  | 3  | --     | --   |
| CakTC40923 | Ca(ICC2/PI489777)SNP_21019 | 513  | C | A | 6  | 7  | --     | --   |
| CakTC39958 | Ca(ICC2/PI489777)SNP_21020 | 289  | A | G | 7  | 12 | --     | --   |
|            | Ca(ICC2/PI489777)SNP_21021 | 379  | A | G | 7  | 9  | --     | --   |
| CakTC38772 | Ca(ICC2/PI489777)SNP_21022 | 690  | T | C | 35 | 26 | --     | --   |
| CakTC39945 | Ca(ICC2/PI489777)SNP_21023 | 673  | G | A | 30 | 20 | --     | --   |
|            | Ca(ICC2/PI489777)SNP_21024 | 891  | T | C | 30 | 34 | --     | --   |
| CakTC41832 | Ca(ICC2/PI489777)SNP_21025 | 583  | T | C | 4  | 4  | --     | --   |
| CakTC22468 | Ca(ICC2/PI489777)SNP_21026 | 781  | C | A | 4  | 9  | Flower | bud  |
|            | Ca(ICC2/PI489777)SNP_21027 | 802  | T | C | 4  | 5  | Flower | bud  |
| CakTC34258 | Ca(ICC2/PI489777)SNP_21028 | 518  | C | G | 49 | 22 | --     | TPR  |
|            | Ca(ICC2/PI489777)SNP_21029 | 1141 | C | T | 51 | 21 | --     | TPR  |
|            | Ca(ICC2/PI489777)SNP_21030 | 1351 | A | G | 62 | 35 | --     | TPR  |
|            | Ca(ICC2/PI489777)SNP_21031 | 1405 | A | G | 68 | 22 | --     | TPR  |
| CakTC26012 | Ca(ICC2/PI489777)SNP_21032 | 1028 | A | G | 33 | 27 | --     | --   |
|            | Ca(ICC2/PI489777)SNP_21033 | 1303 | G | A | 39 | 30 | --     | --   |
|            | Ca(ICC2/PI489777)SNP_21034 | 1310 | C | T | 38 | 29 | --     | --   |
|            | Ca(ICC2/PI489777)SNP_21035 | 2067 | G | A | 34 | 4  | --     | --   |
|            | Ca(ICC2/PI489777)SNP_21036 | 2367 | T | A | 19 | 6  | --     | --   |
|            | Ca(ICC2/PI489777)SNP_21037 | 2440 | A | T | 19 | 8  | --     | --   |
|            | Ca(ICC2/PI489777)SNP_21038 | 2459 | T | C | 13 | 6  | --     | --   |
|            | Ca(ICC2/PI489777)SNP_21039 | 2498 | C | A | 21 | 6  | --     | --   |
|            | Ca(ICC2/PI489777)SNP_21040 | 2662 | T | A | 25 | 9  | --     | --   |
|            | Ca(ICC2/PI489777)SNP_21041 | 2710 | T | C | 25 | 13 | --     | --   |
|            | Ca(ICC2/PI489777)SNP_21042 | 2755 | T | C | 27 | 14 | --     | --   |
|            | Ca(ICC2/PI489777)SNP_21043 | 3027 | C | T | 17 | 15 | --     | --   |
|            | Ca(ICC2/PI489777)SNP_21044 | 3211 | C | T | 21 | 6  | --     | --   |
|            | Ca(ICC2/PI489777)SNP_21045 | 3307 | C | A | 22 | 3  | --     | --   |
| CakTC27156 | Ca(ICC2/PI489777)SNP_21046 | 241  | T | C | 6  | 3  | --     | --   |
|            | Ca(ICC2/PI489777)SNP_21047 | 480  | T | C | 7  | 3  | --     | --   |
| CakTC09801 | Ca(ICC2/PI489777)SNP_21048 | 272  | G | A | 7  | 6  | Flower | bud  |
|            | Ca(ICC2/PI489777)SNP_21049 | 614  | C | A | 10 | 9  | Flower | bud  |
| CakTC40479 | Ca(ICC2/PI489777)SNP_21050 | 290  | T | C | 4  | 8  | --     | --   |
| CakTC03979 | Ca(ICC2/PI489777)SNP_21051 | 806  | C | G | 18 | 15 | --     | --   |
|            | Ca(ICC2/PI489777)SNP_21052 | 1645 | G | A | 10 | 10 | --     | --   |
|            | Ca(ICC2/PI489777)SNP_21053 | 1687 | G | A | 9  | 7  | --     | --   |
|            | Ca(ICC2/PI489777)SNP_21054 | 2661 | T | C | 14 | 15 | --     | --   |
| CakTC26842 | Ca(ICC2/PI489777)SNP_21055 | 1364 | C | T | 14 | 3  | Flower | bud  |
|            | Ca(ICC2/PI489777)SNP_21056 | 1537 | C | G | 18 | 4  | Flower | bud  |
|            | Ca(ICC2/PI489777)SNP_21057 | 2541 | A | G | 18 | 6  | Flower | bud  |
|            | Ca(ICC2/PI489777)SNP_21058 | 2859 | T | G | 10 | 3  | Flower | bud  |
| CakTC40889 | Ca(ICC2/PI489777)SNP_21059 | 68   | A | T | 4  | 3  | --     | --   |
|            | Ca(ICC2/PI489777)SNP_21060 | 127  | A | G | 4  | 3  | --     | --   |
|            | Ca(ICC2/PI489777)SNP_21061 | 694  | C | T | 4  | 5  | --     | --   |
| CakTC32054 | Ca(ICC2/PI489777)SNP_21062 | 1247 | C | A | 7  | 3  | --     | --   |
|            | Ca(ICC2/PI489777)SNP_21063 | 1366 | G | A | 6  | 3  | --     | --   |
|            | Ca(ICC2/PI489777)SNP_21064 | 1430 | A | G | 4  | 3  | --     | --   |
| CakTC28169 | Ca(ICC2/PI489777)SNP_21065 | 216  | C | T | 12 | 9  | --     | bZIP |
|            | Ca(ICC2/PI489777)SNP_21066 | 1177 | A | G | 22 | 8  | --     | bZIP |
|            | Ca(ICC2/PI489777)SNP_21067 | 1296 | C | T | 26 | 11 | --     | bZIP |
| CakTC34216 | Ca(ICC2/PI489777)SNP_21068 | 2968 | T | C | 9  | 13 | --     | TAZ  |
|            | Ca(ICC2/PI489777)SNP_21069 | 3673 | G | A | 19 | 10 | --     | TAZ  |
| CakTC27483 | Ca(ICC2/PI489777)SNP_21070 | 750  | T | C | 3  | 3  | --     | HRT  |
| CakTC36905 | Ca(ICC2/PI489777)SNP_21071 | 594  | T | C | 5  | 3  | --     | C3H  |
|            | Ca(ICC2/PI489777)SNP_21072 | 657  | G | A | 4  | 4  | --     | C3H  |
|            | Ca(ICC2/PI489777)SNP_21073 | 697  | C | G | 4  | 4  | --     | C3H  |
|            | Ca(ICC2/PI489777)SNP_21074 | 705  | C | T | 5  | 4  | --     | C3H  |
|            | Ca(ICC2/PI489777)SNP_21075 | 1191 | C | T | 6  | 3  | --     | C3H  |
|            | Ca(ICC2/PI489777)SNP_21076 | 1206 | T | C | 6  | 3  | --     | C3H  |
|            | Ca(ICC2/PI489777)SNP_21077 | 1272 | G | A | 4  | 4  | --     | C3H  |
|            | Ca(ICC2/PI489777)SNP_21078 | 1299 | T | C | 3  | 4  | --     | C3H  |
|            | Ca(ICC2/PI489777)SNP_21079 | 1329 | T | C | 8  | 4  | --     | C3H  |
|            | Ca(ICC2/PI489777)SNP_21080 | 1374 | A | G | 8  | 5  | --     | C3H  |
|            | Ca(ICC2/PI489777)SNP_21081 | 2109 | T | C | 3  | 6  | --     | C3H  |
|            | Ca(ICC2/PI489777)SNP_21082 | 2135 | A | G | 5  | 5  | --     | C3H  |
|            | Ca(ICC2/PI489777)SNP_21083 | 2137 | G | A | 5  | 5  | --     | C3H  |
| CakTC34910 | Ca(ICC2/PI489777)SNP_21084 | 465  | G | A | 10 | 16 | --     | --   |
|            | Ca(ICC2/PI489777)SNP_21085 | 470  | G | A | 11 | 18 | --     | --   |

|            |                            |      |   |   |     |     |        |         |
|------------|----------------------------|------|---|---|-----|-----|--------|---------|
|            | Ca(ICC2/PI489777)SNP_21086 | 1833 | G | A | 12  | 14  | --     | --      |
|            | Ca(ICC2/PI489777)SNP_21087 | 3357 | T | C | 17  | 19  | --     | --      |
|            | Ca(ICC2/PI489777)SNP_21088 | 3460 | A | G | 11  | 9   | --     | --      |
| CakTC09833 | Ca(ICC2/PI489777)SNP_21089 | 573  | T | C | 14  | 8   | --     | --      |
| CakTC28698 | Ca(ICC2/PI489777)SNP_21090 | 550  | C | T | 11  | 7   | --     | --      |
|            | Ca(ICC2/PI489777)SNP_21091 | 597  | T | C | 10  | 7   | --     | --      |
|            | Ca(ICC2/PI489777)SNP_21092 | 1342 | T | C | 8   | 19  | --     | --      |
|            | Ca(ICC2/PI489777)SNP_21093 | 1964 | G | T | 6   | 13  | --     | --      |
|            | Ca(ICC2/PI489777)SNP_21094 | 1965 | G | C | 6   | 14  | --     | --      |
|            | Ca(ICC2/PI489777)SNP_21095 | 1993 | A | G | 9   | 14  | --     | --      |
| CakTC35905 | Ca(ICC2/PI489777)SNP_21096 | 416  | G | A | 13  | 15  | --     | --      |
|            | Ca(ICC2/PI489777)SNP_21097 | 752  | A | C | 8   | 6   | --     | --      |
|            | Ca(ICC2/PI489777)SNP_21098 | 887  | T | G | 5   | 4   | --     | --      |
|            | Ca(ICC2/PI489777)SNP_21099 | 2680 | T | C | 4   | 7   | --     | --      |
| CakTC42661 | Ca(ICC2/PI489777)SNP_21100 | 281  | C | G | 20  | 7   | --     | --      |
|            | Ca(ICC2/PI489777)SNP_21101 | 864  | A | C | 12  | 16  | --     | --      |
| CakTC31197 | Ca(ICC2/PI489777)SNP_21102 | 318  | G | A | 6   | 5   | --     | --      |
|            | Ca(ICC2/PI489777)SNP_21103 | 831  | G | A | 7   | 3   | --     | --      |
|            | Ca(ICC2/PI489777)SNP_21104 | 992  | T | C | 6   | 4   | --     | --      |
|            | Ca(ICC2/PI489777)SNP_21105 | 1542 | G | A | 4   | 5   | --     | --      |
| CakTC37797 | Ca(ICC2/PI489777)SNP_21106 | 853  | A | C | 4   | 11  | Flower | bud     |
| CakTC43318 | Ca(ICC2/PI489777)SNP_21107 | 2739 | C | A | 15  | 4   | --     | --      |
|            | Ca(ICC2/PI489777)SNP_21108 | 2828 | A | G | 13  | 5   | --     | --      |
| CakTC26969 | Ca(ICC2/PI489777)SNP_21109 | 385  | G | A | 7   | 4   | --     | --      |
|            | Ca(ICC2/PI489777)SNP_21110 | 400  | C | T | 7   | 4   | --     | --      |
| CakTC24317 | Ca(ICC2/PI489777)SNP_21111 | 408  | A | C | 19  | 6   | --     | --      |
|            | Ca(ICC2/PI489777)SNP_21112 | 780  | C | T | 18  | 8   | --     | --      |
| CakTC34833 | Ca(ICC2/PI489777)SNP_21113 | 1942 | C | G | 15  | 4   | --     | SBP     |
|            | Ca(ICC2/PI489777)SNP_21114 | 2462 | G | A | 16  | 9   | --     | SBP     |
|            | Ca(ICC2/PI489777)SNP_21115 | 2698 | G | A | 8   | 9   | --     | SBP     |
|            | Ca(ICC2/PI489777)SNP_21116 | 2787 | A | C | 11  | 8   | --     | SBP     |
| CakTC42515 | Ca(ICC2/PI489777)SNP_21117 | 44   | T | C | 5   | 6   | --     | --      |
|            | Ca(ICC2/PI489777)SNP_21118 | 46   | C | A | 6   | 6   | --     | --      |
|            | Ca(ICC2/PI489777)SNP_21119 | 69   | C | A | 13  | 13  | --     | --      |
|            | Ca(ICC2/PI489777)SNP_21120 | 124  | C | T | 15  | 18  | --     | --      |
|            | Ca(ICC2/PI489777)SNP_21121 | 150  | G | C | 14  | 19  | --     | --      |
|            | Ca(ICC2/PI489777)SNP_21122 | 203  | C | T | 16  | 21  | --     | --      |
|            | Ca(ICC2/PI489777)SNP_21123 | 210  | T | C | 18  | 21  | --     | --      |
|            | Ca(ICC2/PI489777)SNP_21124 | 307  | G | C | 20  | 21  | --     | --      |
|            | Ca(ICC2/PI489777)SNP_21125 | 312  | A | C | 21  | 20  | --     | --      |
|            | Ca(ICC2/PI489777)SNP_21126 | 614  | A | C | 9   | 8   | --     | --      |
|            | Ca(ICC2/PI489777)SNP_21127 | 621  | A | G | 9   | 12  | --     | --      |
| CakTC31308 | Ca(ICC2/PI489777)SNP_21128 | 137  | T | C | 4   | 11  | --     | --      |
|            | Ca(ICC2/PI489777)SNP_21129 | 600  | C | T | 166 | 153 | --     | --      |
| CakTC41373 | Ca(ICC2/PI489777)SNP_21130 | 250  | C | T | 8   | 8   | --     | --      |
|            | Ca(ICC2/PI489777)SNP_21131 | 754  | A | G | 10  | 13  | --     | --      |
|            | Ca(ICC2/PI489777)SNP_21132 | 1192 | G | A | 13  | 7   | --     | --      |
|            | Ca(ICC2/PI489777)SNP_21133 | 1227 | A | T | 14  | 8   | --     | --      |
| CakTC29542 | Ca(ICC2/PI489777)SNP_21134 | 1947 | C | T | 7   | 3   | --     | --      |
| CakTC38386 | Ca(ICC2/PI489777)SNP_21135 | 277  | A | T | 10  | 6   | --     | AUX/IAA |
|            | Ca(ICC2/PI489777)SNP_21136 | 1005 | T | A | 28  | 15  | --     | AUX/IAA |
| CakTC24662 | Ca(ICC2/PI489777)SNP_21137 | 321  | T | C | 60  | 16  | --     | --      |
|            | Ca(ICC2/PI489777)SNP_21138 | 412  | C | T | 37  | 15  | --     | --      |
| CakTC41360 | Ca(ICC2/PI489777)SNP_21139 | 183  | G | T | 40  | 25  | --     | --      |
|            | Ca(ICC2/PI489777)SNP_21140 | 256  | A | C | 56  | 39  | --     | --      |
|            | Ca(ICC2/PI489777)SNP_21141 | 259  | G | A | 56  | 39  | --     | --      |
|            | Ca(ICC2/PI489777)SNP_21142 | 280  | G | A | 56  | 38  | --     | --      |
|            | Ca(ICC2/PI489777)SNP_21143 | 394  | G | A | 61  | 55  | --     | --      |
|            | Ca(ICC2/PI489777)SNP_21144 | 493  | G | A | 57  | 52  | --     | --      |
|            | Ca(ICC2/PI489777)SNP_21145 | 687  | A | T | 38  | 45  | --     | --      |
| CakTC27092 | Ca(ICC2/PI489777)SNP_21146 | 205  | C | G | 15  | 6   | --     | --      |
|            | Ca(ICC2/PI489777)SNP_21147 | 359  | G | A | 14  | 6   | --     | --      |
|            | Ca(ICC2/PI489777)SNP_21148 | 394  | C | T | 12  | 6   | --     | --      |
|            | Ca(ICC2/PI489777)SNP_21149 | 406  | T | C | 10  | 6   | --     | --      |
|            | Ca(ICC2/PI489777)SNP_21150 | 928  | A | C | 15  | 5   | --     | --      |
|            | Ca(ICC2/PI489777)SNP_21151 | 2062 | A | T | 12  | 8   | --     | --      |
|            | Ca(ICC2/PI489777)SNP_21152 | 3477 | T | C | 5   | 3   | --     | --      |
|            | Ca(ICC2/PI489777)SNP_21153 | 3884 | C | A | 5   | 4   | --     | --      |
|            | Ca(ICC2/PI489777)SNP_21154 | 4042 | A | C | 6   | 3   | --     | --      |
| CakTC39400 | Ca(ICC2/PI489777)SNP_21155 | 1014 | T | C | 7   | 5   | --     | --      |
| CakTC29265 | Ca(ICC2/PI489777)SNP_21156 | 990  | C | A | 4   | 6   | --     | --      |
|            | Ca(ICC2/PI489777)SNP_21157 | 1127 | C | T | 5   | 6   | --     | --      |
| CakTC23648 | Ca(ICC2/PI489777)SNP_21158 | 122  | C | T | 5   | 3   | --     | --      |
|            | Ca(ICC2/PI489777)SNP_21159 | 1259 | G | C | 11  | 4   | --     | --      |

|            |                            |      |   |   |    |    |        |     |
|------------|----------------------------|------|---|---|----|----|--------|-----|
| CakTC43268 | Ca(ICC2/PI489777)SNP_21160 | 246  | A | G | 25 | 30 | --     | --  |
|            | Ca(ICC2/PI489777)SNP_21161 | 486  | T | C | 17 | 32 | --     | --  |
| CakTC42129 | Ca(ICC2/PI489777)SNP_21162 | 725  | G | T | 26 | 5  | --     | --  |
| CakTC34407 | Ca(ICC2/PI489777)SNP_21163 | 1306 | A | T | 15 | 8  | --     | --  |
|            | Ca(ICC2/PI489777)SNP_21164 | 1390 | G | A | 16 | 11 | --     | --  |
|            | Ca(ICC2/PI489777)SNP_21165 | 1435 | G | A | 18 | 9  | --     | --  |
|            | Ca(ICC2/PI489777)SNP_21166 | 1492 | T | G | 20 | 7  | --     | --  |
|            | Ca(ICC2/PI489777)SNP_21167 | 2016 | G | A | 19 | 4  | --     | --  |
| CakTC35650 | Ca(ICC2/PI489777)SNP_21168 | 386  | G | A | 9  | 8  | --     | --  |
|            | Ca(ICC2/PI489777)SNP_21169 | 2105 | A | G | 7  | 11 | --     | --  |
| CakTC27200 | Ca(ICC2/PI489777)SNP_21170 | 302  | C | T | 13 | 13 | --     | --  |
|            | Ca(ICC2/PI489777)SNP_21171 | 353  | G | T | 17 | 14 | --     | --  |
|            | Ca(ICC2/PI489777)SNP_21172 | 1741 | A | G | 26 | 7  | --     | --  |
|            | Ca(ICC2/PI489777)SNP_21173 | 1757 | G | A | 25 | 8  | --     | --  |
| CakTC11655 | Ca(ICC2/PI489777)SNP_21174 | 300  | A | G | 26 | 12 | --     | --  |
|            | Ca(ICC2/PI489777)SNP_21175 | 538  | C | G | 26 | 13 | --     | --  |
|            | Ca(ICC2/PI489777)SNP_21176 | 864  | T | C | 19 | 15 | --     | --  |
|            | Ca(ICC2/PI489777)SNP_21177 | 910  | T | C | 24 | 14 | --     | --  |
|            | Ca(ICC2/PI489777)SNP_21178 | 994  | G | A | 32 | 13 | --     | --  |
|            | Ca(ICC2/PI489777)SNP_21179 | 2527 | C | T | 55 | 28 | --     | --  |
|            | Ca(ICC2/PI489777)SNP_21180 | 2530 | C | T | 55 | 26 | --     | --  |
| CakTC37487 | Ca(ICC2/PI489777)SNP_21181 | 398  | T | A | 26 | 8  | --     | --  |
|            | Ca(ICC2/PI489777)SNP_21182 | 401  | G | A | 25 | 8  | --     | --  |
|            | Ca(ICC2/PI489777)SNP_21183 | 770  | G | T | 21 | 17 | --     | --  |
| CakTC23998 | Ca(ICC2/PI489777)SNP_21184 | 26   | C | T | 14 | 6  | --     | --  |
|            | Ca(ICC2/PI489777)SNP_21185 | 324  | G | A | 27 | 10 | --     | --  |
| CakTC40024 | Ca(ICC2/PI489777)SNP_21186 | 167  | G | A | 3  | 5  | --     | --  |
|            | Ca(ICC2/PI489777)SNP_21187 | 325  | A | G | 8  | 4  | --     | --  |
|            | Ca(ICC2/PI489777)SNP_21188 | 556  | G | C | 10 | 8  | --     | --  |
|            | Ca(ICC2/PI489777)SNP_21189 | 919  | G | A | 10 | 7  | --     | --  |
| CakTC27607 | Ca(ICC2/PI489777)SNP_21190 | 1178 | C | G | 3  | 11 | --     | --  |
| CakTC26045 | Ca(ICC2/PI489777)SNP_21191 | 855  | C | T | 18 | 8  | --     | --  |
|            | Ca(ICC2/PI489777)SNP_21192 | 1831 | G | A | 23 | 11 | --     | --  |
|            | Ca(ICC2/PI489777)SNP_21193 | 2296 | C | T | 17 | 9  | --     | --  |
|            | Ca(ICC2/PI489777)SNP_21194 | 3118 | C | T | 9  | 7  | --     | --  |
|            | Ca(ICC2/PI489777)SNP_21195 | 3494 | C | G | 7  | 4  | --     | --  |
| CakTC37510 | Ca(ICC2/PI489777)SNP_21196 | 964  | C | G | 3  | 8  | --     | --  |
| CakTC39502 | Ca(ICC2/PI489777)SNP_21197 | 1370 | A | G | 11 | 13 | Flower | bud |
|            | Ca(ICC2/PI489777)SNP_21198 | 1381 | A | G | 10 | 13 | Flower | bud |
| CakTC25400 | Ca(ICC2/PI489777)SNP_21199 | 616  | G | A | 6  | 4  | --     | --  |
|            | Ca(ICC2/PI489777)SNP_21200 | 633  | A | C | 5  | 4  | --     | --  |
|            | Ca(ICC2/PI489777)SNP_21201 | 737  | A | C | 7  | 3  | --     | --  |
| CakTC40737 | Ca(ICC2/PI489777)SNP_21202 | 400  | G | A | 19 | 14 | --     | --  |
|            | Ca(ICC2/PI489777)SNP_21203 | 614  | C | G | 17 | 8  | --     | --  |
| CakTC39850 | Ca(ICC2/PI489777)SNP_21204 | 777  | A | G | 29 | 7  | --     | TUB |
|            | Ca(ICC2/PI489777)SNP_21205 | 792  | C | T | 22 | 5  | --     | TUB |
|            | Ca(ICC2/PI489777)SNP_21206 | 1002 | A | G | 24 | 8  | --     | TUB |
|            | Ca(ICC2/PI489777)SNP_21207 | 1077 | A | T | 23 | 8  | --     | TUB |
| CakTC42000 | Ca(ICC2/PI489777)SNP_21208 | 318  | G | A | 3  | 3  | --     | --  |
| CakTC33301 | Ca(ICC2/PI489777)SNP_21209 | 381  | C | G | 7  | 8  | --     | --  |
|            | Ca(ICC2/PI489777)SNP_21210 | 452  | T | C | 5  | 9  | --     | --  |
|            | Ca(ICC2/PI489777)SNP_21211 | 614  | C | T | 8  | 9  | --     | --  |
|            | Ca(ICC2/PI489777)SNP_21212 | 878  | T | C | 8  | 6  | --     | --  |
|            | Ca(ICC2/PI489777)SNP_21213 | 1535 | G | T | 10 | 5  | --     | --  |
|            | Ca(ICC2/PI489777)SNP_21214 | 1868 | C | G | 9  | 5  | --     | --  |
|            | Ca(ICC2/PI489777)SNP_21215 | 1904 | C | G | 12 | 9  | --     | --  |
|            | Ca(ICC2/PI489777)SNP_21216 | 2036 | T | G | 12 | 9  | --     | --  |
|            | Ca(ICC2/PI489777)SNP_21217 | 2117 | A | G | 14 | 10 | --     | --  |
|            | Ca(ICC2/PI489777)SNP_21218 | 2186 | G | T | 15 | 10 | --     | --  |
|            | Ca(ICC2/PI489777)SNP_21219 | 2345 | T | G | 15 | 6  | --     | --  |
|            | Ca(ICC2/PI489777)SNP_21220 | 2375 | G | A | 15 | 6  | --     | --  |
|            | Ca(ICC2/PI489777)SNP_21221 | 2609 | A | T | 17 | 4  | --     | --  |
|            | Ca(ICC2/PI489777)SNP_21222 | 2645 | C | A | 19 | 3  | --     | --  |
| CakTC23419 | Ca(ICC2/PI489777)SNP_21223 | 146  | C | G | 17 | 3  | --     | --  |
|            | Ca(ICC2/PI489777)SNP_21224 | 474  | C | T | 16 | 7  | --     | --  |
| CakTC39573 | Ca(ICC2/PI489777)SNP_21225 | 52   | C | G | 4  | 5  | --     | --  |
|            | Ca(ICC2/PI489777)SNP_21226 | 53   | C | T | 4  | 4  | --     | --  |
|            | Ca(ICC2/PI489777)SNP_21227 | 672  | A | T | 62 | 36 | --     | --  |
|            | Ca(ICC2/PI489777)SNP_21228 | 730  | T | C | 54 | 37 | --     | --  |
|            | Ca(ICC2/PI489777)SNP_21229 | 840  | T | C | 53 | 41 | --     | --  |
|            | Ca(ICC2/PI489777)SNP_21230 | 1012 | T | C | 32 | 24 | --     | --  |
|            | Ca(ICC2/PI489777)SNP_21231 | 1127 | T | G | 13 | 12 | --     | --  |
|            | Ca(ICC2/PI489777)SNP_21232 | 1156 | A | T | 17 | 12 | --     | --  |
|            | Ca(ICC2/PI489777)SNP_21233 | 1246 | G | A | 9  | 4  | --     | --  |

|            |                             |      |   |   |     |     |    |    |
|------------|-----------------------------|------|---|---|-----|-----|----|----|
| CakTC42773 | Ca(ICCV2/PI489777)SNP_21234 | 102  | T | G | 10  | 4   | -- | -- |
|            | Ca(ICCV2/PI489777)SNP_21235 | 407  | T | G | 11  | 10  | -- | -- |
|            | Ca(ICCV2/PI489777)SNP_21236 | 431  | A | C | 11  | 10  | -- | -- |
|            | Ca(ICCV2/PI489777)SNP_21237 | 437  | A | G | 10  | 9   | -- | -- |
|            | Ca(ICCV2/PI489777)SNP_21238 | 518  | C | T | 15  | 9   | -- | -- |
|            | Ca(ICCV2/PI489777)SNP_21239 | 536  | G | A | 18  | 8   | -- | -- |
|            | Ca(ICCV2/PI489777)SNP_21240 | 650  | A | G | 26  | 7   | -- | -- |
|            | Ca(ICCV2/PI489777)SNP_21241 | 758  | C | T | 35  | 3   | -- | -- |
|            | Ca(ICCV2/PI489777)SNP_21242 | 782  | C | T | 39  | 6   | -- | -- |
|            | Ca(ICCV2/PI489777)SNP_21243 | 794  | T | G | 40  | 8   | -- | -- |
|            | Ca(ICCV2/PI489777)SNP_21244 | 860  | T | C | 34  | 13  | -- | -- |
|            | Ca(ICCV2/PI489777)SNP_21245 | 959  | C | T | 32  | 13  | -- | -- |
|            | Ca(ICCV2/PI489777)SNP_21246 | 969  | G | C | 31  | 13  | -- | -- |
|            | Ca(ICCV2/PI489777)SNP_21247 | 1123 | T | A | 23  | 12  | -- | -- |
|            | Ca(ICCV2/PI489777)SNP_21248 | 1202 | G | A | 23  | 6   | -- | -- |
|            | Ca(ICCV2/PI489777)SNP_21249 | 1434 | C | G | 20  | 4   | -- | -- |
| CakTC23720 | Ca(ICCV2/PI489777)SNP_21250 | 1705 | A | G | 19  | 15  | -- | -- |
| CakTC12509 | Ca(ICCV2/PI489777)SNP_21251 | 13   | T | A | 60  | 14  | -- | -- |
|            | Ca(ICCV2/PI489777)SNP_21252 | 279  | T | A | 62  | 15  | -- | -- |
|            | Ca(ICCV2/PI489777)SNP_21253 | 367  | G | C | 73  | 19  | -- | -- |
|            | Ca(ICCV2/PI489777)SNP_21254 | 481  | G | C | 45  | 21  | -- | -- |
|            | Ca(ICCV2/PI489777)SNP_21255 | 678  | C | T | 52  | 19  | -- | -- |
|            | Ca(ICCV2/PI489777)SNP_21256 | 1634 | G | T | 32  | 7   | -- | -- |
|            | Ca(ICCV2/PI489777)SNP_21257 | 2282 | T | C | 29  | 6   | -- | -- |
|            | Ca(ICCV2/PI489777)SNP_21258 | 2294 | T | C | 29  | 5   | -- | -- |
| CakTC33570 | Ca(ICCV2/PI489777)SNP_21259 | 230  | C | G | 6   | 13  | -- | -- |
| CakTC42118 | Ca(ICCV2/PI489777)SNP_21260 | 902  | T | C | 22  | 7   | -- | -- |
| CakTC42668 | Ca(ICCV2/PI489777)SNP_21261 | 221  | C | G | 13  | 10  | -- | -- |
|            | Ca(ICCV2/PI489777)SNP_21262 | 1004 | A | G | 13  | 5   | -- | -- |
|            | Ca(ICCV2/PI489777)SNP_21263 | 1427 | G | A | 9   | 5   | -- | -- |
|            | Ca(ICCV2/PI489777)SNP_21264 | 1434 | A | T | 7   | 5   | -- | -- |
| CakTC13189 | Ca(ICCV2/PI489777)SNP_21265 | 760  | G | A | 53  | 57  | -- | -- |
|            | Ca(ICCV2/PI489777)SNP_21266 | 913  | G | A | 50  | 62  | -- | -- |
| CakTC38620 | Ca(ICCV2/PI489777)SNP_21267 | 1914 | T | C | 16  | 15  | -- | -- |
|            | Ca(ICCV2/PI489777)SNP_21268 | 2081 | G | C | 14  | 18  | -- | -- |
| CakTC23051 | Ca(ICCV2/PI489777)SNP_21269 | 93   | T | C | 13  | 11  | -- | -- |
| CakTC23689 | Ca(ICCV2/PI489777)SNP_21270 | 105  | A | G | 23  | 4   | -- | -- |
|            | Ca(ICCV2/PI489777)SNP_21271 | 143  | A | G | 48  | 14  | -- | -- |
| CakTC38357 | Ca(ICCV2/PI489777)SNP_21272 | 991  | T | G | 147 | 128 | -- | -- |
|            | Ca(ICCV2/PI489777)SNP_21273 | 1018 | T | G | 138 | 127 | -- | -- |
|            | Ca(ICCV2/PI489777)SNP_21274 | 1048 | A | G | 116 | 103 | -- | -- |
| CakTC29005 | Ca(ICCV2/PI489777)SNP_21275 | 911  | G | A | 6   | 3   | -- | -- |
| CakTC28245 | Ca(ICCV2/PI489777)SNP_21276 | 515  | A | C | 5   | 4   | -- | -- |
| CakTC32703 | Ca(ICCV2/PI489777)SNP_21277 | 438  | C | T | 12  | 16  | -- | -- |
|            | Ca(ICCV2/PI489777)SNP_21278 | 553  | G | A | 3   | 4   | -- | -- |
| CakTC39050 | Ca(ICCV2/PI489777)SNP_21279 | 552  | C | T | 21  | 18  | -- | -- |
| CakTC37843 | Ca(ICCV2/PI489777)SNP_21280 | 97   | T | A | 4   | 7   | -- | -- |
|            | Ca(ICCV2/PI489777)SNP_21281 | 145  | G | C | 6   | 5   | -- | -- |
|            | Ca(ICCV2/PI489777)SNP_21282 | 244  | G | C | 7   | 15  | -- | -- |
|            | Ca(ICCV2/PI489777)SNP_21283 | 673  | C | A | 18  | 20  | -- | -- |
| CakTC42696 | Ca(ICCV2/PI489777)SNP_21284 | 438  | G | A | 104 | 131 | -- | -- |
| CakTC37121 | Ca(ICCV2/PI489777)SNP_21285 | 324  | A | C | 11  | 7   | -- | -- |
|            | Ca(ICCV2/PI489777)SNP_21286 | 357  | T | C | 12  | 14  | -- | -- |
|            | Ca(ICCV2/PI489777)SNP_21287 | 363  | C | T | 15  | 15  | -- | -- |
|            | Ca(ICCV2/PI489777)SNP_21288 | 585  | C | G | 29  | 24  | -- | -- |
| CakTC31891 | Ca(ICCV2/PI489777)SNP_21289 | 968  | C | T | 4   | 3   | -- | -- |
| CakTC39813 | Ca(ICCV2/PI489777)SNP_21290 | 1000 | T | C | 60  | 41  | -- | -- |
| CakTC12129 | Ca(ICCV2/PI489777)SNP_21291 | 414  | C | T | 10  | 11  | -- | -- |
|            | Ca(ICCV2/PI489777)SNP_21292 | 459  | T | C | 9   | 9   | -- | -- |
|            | Ca(ICCV2/PI489777)SNP_21293 | 1008 | T | G | 6   | 5   | -- | -- |
| CakTC34201 | Ca(ICCV2/PI489777)SNP_21294 | 957  | C | G | 14  | 11  | -- | -- |
|            | Ca(ICCV2/PI489777)SNP_21295 | 1190 | A | G | 18  | 7   | -- | -- |
|            | Ca(ICCV2/PI489777)SNP_21296 | 1326 | C | T | 21  | 7   | -- | -- |
|            | Ca(ICCV2/PI489777)SNP_21297 | 2750 | A | G | 11  | 6   | -- | -- |
|            | Ca(ICCV2/PI489777)SNP_21298 | 2793 | C | T | 11  | 5   | -- | -- |
|            | Ca(ICCV2/PI489777)SNP_21299 | 3628 | A | T | 7   | 3   | -- | -- |
|            | Ca(ICCV2/PI489777)SNP_21300 | 3651 | A | G | 8   | 3   | -- | -- |
|            | Ca(ICCV2/PI489777)SNP_21301 | 3724 | C | A | 7   | 5   | -- | -- |
|            | Ca(ICCV2/PI489777)SNP_21302 | 3916 | G | T | 5   | 8   | -- | -- |
|            | Ca(ICCV2/PI489777)SNP_21303 | 4288 | A | G | 4   | 10  | -- | -- |
|            | Ca(ICCV2/PI489777)SNP_21304 | 4733 | T | G | 8   | 5   | -- | -- |
|            | Ca(ICCV2/PI489777)SNP_21305 | 5192 | A | G | 13  | 8   | -- | -- |
|            | Ca(ICCV2/PI489777)SNP_21306 | 5673 | A | T | 4   | 4   | -- | -- |
|            | Ca(ICCV2/PI489777)SNP_21307 | 5690 | G | A | 3   | 4   | -- | -- |



|            |                            |      |   |   |    |    |      |    |
|------------|----------------------------|------|---|---|----|----|------|----|
|            | Ca(ICC2/PI489777)SNP_21308 | 5693 | G | C | 3  | 4  | --   | -- |
|            | Ca(ICC2/PI489777)SNP_21309 | 5794 | C | T | 3  | 5  | --   | -- |
| CakTC38619 | Ca(ICC2/PI489777)SNP_21310 | 407  | G | A | 4  | 7  | Root | -- |
|            | Ca(ICC2/PI489777)SNP_21311 | 475  | C | T | 3  | 7  | Root | -- |
| CakTC11384 | Ca(ICC2/PI489777)SNP_21312 | 400  | C | G | 47 | 18 | --   | -- |
|            | Ca(ICC2/PI489777)SNP_21313 | 526  | A | T | 37 | 21 | --   | -- |
|            | Ca(ICC2/PI489777)SNP_21314 | 585  | C | T | 33 | 15 | --   | -- |
|            | Ca(ICC2/PI489777)SNP_21315 | 616  | C | T | 27 | 13 | --   | -- |
|            | Ca(ICC2/PI489777)SNP_21316 | 985  | G | A | 16 | 12 | --   | -- |
|            | Ca(ICC2/PI489777)SNP_21317 | 1231 | G | C | 9  | 4  | --   | -- |
|            | Ca(ICC2/PI489777)SNP_21318 | 1319 | T | C | 3  | 3  | --   | -- |
| CakTC41271 | Ca(ICC2/PI489777)SNP_21319 | 802  | G | A | 6  | 3  | --   | -- |
|            | Ca(ICC2/PI489777)SNP_21320 | 1780 | G | A | 4  | 4  | --   | -- |
|            | Ca(ICC2/PI489777)SNP_21321 | 2353 | A | T | 5  | 3  | --   | -- |
| CakTC26043 | Ca(ICC2/PI489777)SNP_21322 | 700  | G | A | 10 | 6  | --   | -- |
| CakTC36203 | Ca(ICC2/PI489777)SNP_21323 | 1643 | T | C | 8  | 4  | --   | -- |
|            | Ca(ICC2/PI489777)SNP_21324 | 2574 | C | T | 11 | 5  | --   | -- |
|            | Ca(ICC2/PI489777)SNP_21325 | 3512 | G | A | 8  | 6  | --   | -- |
| CakTC41671 | Ca(ICC2/PI489777)SNP_21326 | 584  | A | G | 7  | 7  | --   | -- |
|            | Ca(ICC2/PI489777)SNP_21327 | 1016 | T | C | 7  | 5  | --   | -- |
|            | Ca(ICC2/PI489777)SNP_21328 | 1328 | C | T | 9  | 5  | --   | -- |
|            | Ca(ICC2/PI489777)SNP_21329 | 1452 | A | G | 11 | 4  | --   | -- |
|            | Ca(ICC2/PI489777)SNP_21330 | 1481 | A | G | 9  | 4  | --   | -- |
|            | Ca(ICC2/PI489777)SNP_21331 | 1502 | A | G | 14 | 4  | --   | -- |
|            | Ca(ICC2/PI489777)SNP_21332 | 1697 | T | C | 12 | 3  | --   | -- |
| CakTC27050 | Ca(ICC2/PI489777)SNP_21333 | 284  | T | G | 10 | 7  | --   | -- |
|            | Ca(ICC2/PI489777)SNP_21334 | 843  | G | A | 5  | 4  | --   | -- |
|            | Ca(ICC2/PI489777)SNP_21335 | 889  | T | G | 8  | 6  | --   | -- |
|            | Ca(ICC2/PI489777)SNP_21336 | 907  | A | G | 61 | 8  | --   | -- |
| CakTC22738 | Ca(ICC2/PI489777)SNP_21337 | 45   | A | G | 23 | 32 | --   | -- |
|            | Ca(ICC2/PI489777)SNP_21338 | 94   | C | T | 29 | 37 | --   | -- |
|            | Ca(ICC2/PI489777)SNP_21339 | 276  | T | A | 31 | 48 | --   | -- |
|            | Ca(ICC2/PI489777)SNP_21340 | 724  | A | G | 13 | 4  | --   | -- |
|            | Ca(ICC2/PI489777)SNP_21341 | 858  | A | T | 39 | 20 | --   | -- |
|            | Ca(ICC2/PI489777)SNP_21342 | 951  | A | G | 34 | 19 | --   | -- |
|            | Ca(ICC2/PI489777)SNP_21343 | 1025 | G | T | 37 | 20 | --   | -- |
|            | Ca(ICC2/PI489777)SNP_21344 | 1095 | G | T | 34 | 18 | --   | -- |
| CakTC26595 | Ca(ICC2/PI489777)SNP_21345 | 1686 | A | T | 4  | 3  | --   | -- |
| CakTC33975 | Ca(ICC2/PI489777)SNP_21346 | 154  | G | A | 11 | 8  | --   | -- |
|            | Ca(ICC2/PI489777)SNP_21347 | 406  | A | G | 14 | 13 | --   | -- |
|            | Ca(ICC2/PI489777)SNP_21348 | 466  | A | G | 11 | 6  | --   | -- |
|            | Ca(ICC2/PI489777)SNP_21349 | 475  | C | A | 11 | 7  | --   | -- |
| CakTC41778 | Ca(ICC2/PI489777)SNP_21350 | 88   | C | G | 11 | 13 | --   | -- |
|            | Ca(ICC2/PI489777)SNP_21351 | 306  | A | C | 29 | 29 | --   | -- |
| CakTC29363 | Ca(ICC2/PI489777)SNP_21352 | 189  | A | T | 8  | 12 | --   | -- |
|            | Ca(ICC2/PI489777)SNP_21353 | 212  | C | G | 8  | 9  | --   | -- |
| CakTC24639 | Ca(ICC2/PI489777)SNP_21354 | 77   | T | C | 7  | 8  | --   | -- |
|            | Ca(ICC2/PI489777)SNP_21355 | 630  | T | C | 8  | 20 | --   | -- |
|            | Ca(ICC2/PI489777)SNP_21356 | 1095 | C | T | 37 | 25 | --   | -- |
|            | Ca(ICC2/PI489777)SNP_21357 | 1156 | G | A | 38 | 26 | --   | -- |
|            | Ca(ICC2/PI489777)SNP_21358 | 1186 | G | A | 35 | 22 | --   | -- |
|            | Ca(ICC2/PI489777)SNP_21359 | 1191 | C | T | 36 | 23 | --   | -- |
| CakTC01733 | Ca(ICC2/PI489777)SNP_21360 | 81   | A | G | 10 | 3  | --   | -- |
|            | Ca(ICC2/PI489777)SNP_21361 | 136  | C | T | 9  | 3  | --   | -- |
| CakTC04070 | Ca(ICC2/PI489777)SNP_21362 | 659  | C | T | 4  | 13 | --   | -- |
|            | Ca(ICC2/PI489777)SNP_21363 | 660  | G | A | 4  | 13 | --   | -- |
| CakTC25601 | Ca(ICC2/PI489777)SNP_21364 | 636  | C | T | 5  | 5  | --   | -- |
|            | Ca(ICC2/PI489777)SNP_21365 | 673  | T | G | 10 | 3  | --   | -- |
|            | Ca(ICC2/PI489777)SNP_21366 | 686  | C | A | 9  | 4  | --   | -- |
|            | Ca(ICC2/PI489777)SNP_21367 | 752  | T | A | 7  | 3  | --   | -- |
|            | Ca(ICC2/PI489777)SNP_21368 | 763  | G | A | 9  | 5  | --   | -- |
| CakTC41586 | Ca(ICC2/PI489777)SNP_21369 | 543  | A | G | 9  | 14 | --   | -- |
|            | Ca(ICC2/PI489777)SNP_21370 | 980  | C | G | 11 | 5  | --   | -- |
|            | Ca(ICC2/PI489777)SNP_21371 | 1632 | T | C | 13 | 6  | --   | -- |
|            | Ca(ICC2/PI489777)SNP_21372 | 1755 | T | C | 11 | 7  | --   | -- |
|            | Ca(ICC2/PI489777)SNP_21373 | 1835 | G | A | 14 | 6  | --   | -- |
|            | Ca(ICC2/PI489777)SNP_21374 | 2208 | G | A | 15 | 12 | --   | -- |
| CakTC12115 | Ca(ICC2/PI489777)SNP_21375 | 196  | C | T | 10 | 4  | --   | -- |
|            | Ca(ICC2/PI489777)SNP_21376 | 588  | C | T | 7  | 4  | --   | -- |
| CakTC27325 | Ca(ICC2/PI489777)SNP_21377 | 782  | A | G | 7  | 3  | --   | -- |
| CakTC38434 | Ca(ICC2/PI489777)SNP_21378 | 85   | T | C | 18 | 5  | --   | -- |
|            | Ca(ICC2/PI489777)SNP_21379 | 167  | G | A | 18 | 6  | --   | -- |
|            | Ca(ICC2/PI489777)SNP_21380 | 1500 | A | G | 11 | 7  | --   | -- |
|            | Ca(ICC2/PI489777)SNP_21381 | 1549 | G | A | 9  | 6  | --   | -- |

|            |                            |      |   |   |     |     |           |    |
|------------|----------------------------|------|---|---|-----|-----|-----------|----|
| CakTC27807 | Ca(ICC2/PI489777)SNP_21382 | 30   | G | C | 28  | 3   | --        | -- |
| CakTC09281 | Ca(ICC2/PI489777)SNP_21383 | 1166 | G | A | 3   | 4   | --        | -- |
| CakTC23754 | Ca(ICC2/PI489777)SNP_21384 | 202  | T | A | 364 | 147 | --        | -- |
|            | Ca(ICC2/PI489777)SNP_21385 | 568  | C | T | 48  | 17  | --        | -- |
|            | Ca(ICC2/PI489777)SNP_21386 | 589  | C | T | 9   | 13  | --        | -- |
|            | Ca(ICC2/PI489777)SNP_21387 | 623  | A | G | 8   | 11  | --        | -- |
| CakTC31968 | Ca(ICC2/PI489777)SNP_21388 | 620  | T | A | 3   | 3   | --        | -- |
|            | Ca(ICC2/PI489777)SNP_21389 | 830  | C | T | 3   | 3   | --        | -- |
| CakTC34004 | Ca(ICC2/PI489777)SNP_21390 | 939  | G | A | 9   | 3   | --        | -- |
|            | Ca(ICC2/PI489777)SNP_21391 | 1832 | G | A | 8   | 4   | --        | -- |
|            | Ca(ICC2/PI489777)SNP_21392 | 1843 | A | T | 8   | 7   | --        | -- |
| CakTC21560 | Ca(ICC2/PI489777)SNP_21393 | 376  | A | G | 6   | 3   | --        | -- |
|            | Ca(ICC2/PI489777)SNP_21394 | 487  | G | A | 5   | 3   | --        | -- |
|            | Ca(ICC2/PI489777)SNP_21395 | 1735 | G | T | 5   | 3   | --        | -- |
|            | Ca(ICC2/PI489777)SNP_21396 | 1819 | A | G | 6   | 3   | --        | -- |
|            | Ca(ICC2/PI489777)SNP_21397 | 2693 | G | A | 6   | 3   | --        | -- |
|            | Ca(ICC2/PI489777)SNP_21398 | 3638 | T | G | 8   | 6   | --        | -- |
|            | Ca(ICC2/PI489777)SNP_21399 | 4084 | C | G | 12  | 7   | --        | -- |
|            | Ca(ICC2/PI489777)SNP_21400 | 4714 | G | A | 3   | 5   | --        | -- |
| CakTC22428 | Ca(ICC2/PI489777)SNP_21401 | 426  | A | G | 45  | 31  | --        | -- |
|            | Ca(ICC2/PI489777)SNP_21402 | 453  | A | G | 48  | 34  | --        | -- |
|            | Ca(ICC2/PI489777)SNP_21403 | 945  | G | A | 42  | 32  | --        | -- |
| CakTC39880 | Ca(ICC2/PI489777)SNP_21404 | 212  | T | C | 11  | 19  | --        | -- |
|            | Ca(ICC2/PI489777)SNP_21405 | 1321 | G | C | 7   | 4   | --        | -- |
| CakTC24593 | Ca(ICC2/PI489777)SNP_21406 | 572  | G | A | 4   | 3   | --        | -- |
|            | Ca(ICC2/PI489777)SNP_21407 | 573  | C | T | 4   | 3   | --        | -- |
|            | Ca(ICC2/PI489777)SNP_21408 | 817  | G | A | 5   | 3   | --        | -- |
|            | Ca(ICC2/PI489777)SNP_21409 | 871  | G | C | 5   | 4   | --        | -- |
| CakTC37681 | Ca(ICC2/PI489777)SNP_21410 | 1238 | A | G | 5   | 15  | --        | -- |
|            | Ca(ICC2/PI489777)SNP_21411 | 1263 | C | G | 3   | 7   | --        | -- |
| CakTC23776 | Ca(ICC2/PI489777)SNP_21412 | 1615 | C | T | 3   | 11  | --        | -- |
| CakTC27597 | Ca(ICC2/PI489777)SNP_21413 | 595  | T | C | 13  | 3   | --        | -- |
|            | Ca(ICC2/PI489777)SNP_21414 | 742  | T | C | 12  | 8   | --        | -- |
|            | Ca(ICC2/PI489777)SNP_21415 | 760  | C | T | 10  | 8   | --        | -- |
|            | Ca(ICC2/PI489777)SNP_21416 | 788  | G | A | 12  | 7   | --        | -- |
| CakTC39218 | Ca(ICC2/PI489777)SNP_21417 | 372  | A | C | 7   | 3   | --        | -- |
| CakTC38907 | Ca(ICC2/PI489777)SNP_21418 | 86   | T | A | 21  | 3   | --        | -- |
|            | Ca(ICC2/PI489777)SNP_21419 | 511  | C | G | 22  | 8   | --        | -- |
| CakTC41027 | Ca(ICC2/PI489777)SNP_21420 | 213  | T | C | 19  | 3   | --        | -- |
|            | Ca(ICC2/PI489777)SNP_21421 | 1867 | G | T | 14  | 7   | --        | -- |
|            | Ca(ICC2/PI489777)SNP_21422 | 1947 | T | C | 10  | 6   | --        | -- |
| CakTC06132 | Ca(ICC2/PI489777)SNP_21423 | 88   | A | G | 8   | 9   | --        | -- |
|            | Ca(ICC2/PI489777)SNP_21424 | 188  | A | G | 9   | 14  | --        | -- |
|            | Ca(ICC2/PI489777)SNP_21425 | 312  | G | T | 19  | 14  | --        | -- |
|            | Ca(ICC2/PI489777)SNP_21426 | 347  | A | T | 18  | 14  | --        | -- |
| CakTC38968 | Ca(ICC2/PI489777)SNP_21427 | 881  | T | C | 23  | 26  | --        | -- |
|            | Ca(ICC2/PI489777)SNP_21428 | 940  | C | T | 21  | 19  | --        | -- |
|            | Ca(ICC2/PI489777)SNP_21429 | 982  | T | A | 16  | 15  | --        | -- |
| CakTC36210 | Ca(ICC2/PI489777)SNP_21430 | 59   | T | G | 3   | 3   | --        | -- |
|            | Ca(ICC2/PI489777)SNP_21431 | 186  | A | G | 17  | 10  | --        | -- |
| CakTC39727 | Ca(ICC2/PI489777)SNP_21432 | 412  | T | A | 5   | 3   | --        | -- |
|            | Ca(ICC2/PI489777)SNP_21433 | 649  | C | T | 7   | 3   | --        | -- |
|            | Ca(ICC2/PI489777)SNP_21434 | 751  | C | T | 10  | 4   | --        | -- |
|            | Ca(ICC2/PI489777)SNP_21435 | 802  | A | G | 9   | 5   | --        | -- |
|            | Ca(ICC2/PI489777)SNP_21436 | 832  | G | T | 8   | 5   | --        | -- |
|            | Ca(ICC2/PI489777)SNP_21437 | 1009 | T | C | 4   | 4   | --        | -- |
| CakTC29940 | Ca(ICC2/PI489777)SNP_21438 | 83   | T | C | 14  | 5   | --        | -- |
|            | Ca(ICC2/PI489777)SNP_21439 | 159  | T | A | 15  | 5   | --        | -- |
|            | Ca(ICC2/PI489777)SNP_21440 | 337  | G | A | 19  | 7   | --        | -- |
|            | Ca(ICC2/PI489777)SNP_21441 | 1959 | T | C | 23  | 3   | --        | -- |
| CakTC08473 | Ca(ICC2/PI489777)SNP_21442 | 1287 | G | C | 3   | 3   | --        | -- |
| CakTC33901 | Ca(ICC2/PI489777)SNP_21443 | 464  | A | T | 7   | 8   | --        | -- |
|            | Ca(ICC2/PI489777)SNP_21444 | 477  | C | T | 6   | 9   | --        | -- |
| CakTC33906 | Ca(ICC2/PI489777)SNP_21445 | 164  | G | T | 11  | 10  | --        | -- |
|            | Ca(ICC2/PI489777)SNP_21446 | 457  | T | G | 19  | 12  | --        | -- |
| CakTC37409 | Ca(ICC2/PI489777)SNP_21447 | 406  | T | C | 6   | 4   | Young_pod | -- |
|            | Ca(ICC2/PI489777)SNP_21448 | 465  | C | A | 5   | 3   | Young_pod | -- |
|            | Ca(ICC2/PI489777)SNP_21449 | 537  | G | A | 5   | 3   | Young_pod | -- |
|            | Ca(ICC2/PI489777)SNP_21450 | 838  | G | A | 7   | 5   | Young_pod | -- |
|            | Ca(ICC2/PI489777)SNP_21451 | 902  | T | G | 10  | 4   | Young_pod | -- |
| CakTC41244 | Ca(ICC2/PI489777)SNP_21452 | 91   | C | A | 28  | 10  | --        | -- |
|            | Ca(ICC2/PI489777)SNP_21453 | 249  | A | C | 34  | 11  | --        | -- |
|            | Ca(ICC2/PI489777)SNP_21454 | 436  | C | T | 36  | 10  | --        | -- |
|            | Ca(ICC2/PI489777)SNP_21455 | 461  | G | T | 35  | 9   | --        | -- |

|            |                             |      |   |   |     |    |        |           |
|------------|-----------------------------|------|---|---|-----|----|--------|-----------|
|            | Ca(ICCV2/PI489777)SNP_21456 | 497  | C | G | 18  | 3  | --     | --        |
| CakTC35938 | Ca(ICCV2/PI489777)SNP_21457 | 222  | T | C | 21  | 6  | --     | --        |
| CakTC43132 | Ca(ICCV2/PI489777)SNP_21458 | 1004 | A | C | 9   | 12 | --     | --        |
|            | Ca(ICCV2/PI489777)SNP_21459 | 1326 | A | G | 13  | 15 | --     | --        |
|            | Ca(ICCV2/PI489777)SNP_21460 | 1705 | G | A | 4   | 8  | --     | --        |
|            | Ca(ICCV2/PI489777)SNP_21461 | 1719 | A | G | 3   | 8  | --     | --        |
| CakTC22766 | Ca(ICCV2/PI489777)SNP_21462 | 403  | C | G | 15  | 5  | --     | --        |
| CakTC39621 | Ca(ICCV2/PI489777)SNP_21463 | 850  | T | A | 9   | 8  | Flower | bud       |
| CakTC29876 | Ca(ICCV2/PI489777)SNP_21464 | 648  | T | C | 11  | 7  | --     | --        |
|            | Ca(ICCV2/PI489777)SNP_21465 | 1527 | T | C | 7   | 5  | --     | --        |
| CakTC25009 | Ca(ICCV2/PI489777)SNP_21466 | 498  | T | G | 8   | 5  | Flower | bud       |
| CakTC43002 | Ca(ICCV2/PI489777)SNP_21467 | 523  | C | T | 10  | 4  | --     | --        |
| CakTC38606 | Ca(ICCV2/PI489777)SNP_21468 | 267  | A | G | 4   | 13 | --     | C2C2-GATA |
|            | Ca(ICCV2/PI489777)SNP_21469 | 279  | T | C | 5   | 13 | --     | C2C2-GATA |
|            | Ca(ICCV2/PI489777)SNP_21470 | 463  | A | C | 8   | 10 | --     | C2C2-GATA |
|            | Ca(ICCV2/PI489777)SNP_21471 | 490  | G | C | 11  | 8  | --     | C2C2-GATA |
|            | Ca(ICCV2/PI489777)SNP_21472 | 641  | A | G | 12  | 4  | --     | C2C2-GATA |
|            | Ca(ICCV2/PI489777)SNP_21473 | 651  | C | T | 13  | 4  | --     | C2C2-GATA |
|            | Ca(ICCV2/PI489777)SNP_21474 | 681  | G | C | 13  | 4  | --     | C2C2-GATA |
|            | Ca(ICCV2/PI489777)SNP_21475 | 783  | A | G | 19  | 9  | --     | C2C2-GATA |
| CakTC25446 | Ca(ICCV2/PI489777)SNP_21476 | 531  | T | G | 10  | 4  | --     | --        |
|            | Ca(ICCV2/PI489777)SNP_21477 | 669  | A | G | 9   | 5  | --     | --        |
|            | Ca(ICCV2/PI489777)SNP_21478 | 677  | C | T | 10  | 5  | --     | --        |
|            | Ca(ICCV2/PI489777)SNP_21479 | 931  | G | C | 6   | 3  | --     | --        |
|            | Ca(ICCV2/PI489777)SNP_21480 | 1463 | A | G | 11  | 4  | --     | --        |
|            | Ca(ICCV2/PI489777)SNP_21481 | 1630 | T | G | 7   | 3  | --     | --        |
|            | Ca(ICCV2/PI489777)SNP_21482 | 1912 | A | C | 6   | 5  | --     | --        |
|            | Ca(ICCV2/PI489777)SNP_21483 | 2126 | G | A | 5   | 4  | --     | --        |
|            | Ca(ICCV2/PI489777)SNP_21484 | 2438 | C | T | 6   | 3  | --     | --        |
| CakTC26869 | Ca(ICCV2/PI489777)SNP_21485 | 128  | T | G | 99  | 3  | --     | --        |
| CakTC35675 | Ca(ICCV2/PI489777)SNP_21486 | 859  | A | C | 14  | 5  | --     | --        |
|            | Ca(ICCV2/PI489777)SNP_21487 | 2513 | C | T | 30  | 7  | --     | --        |
|            | Ca(ICCV2/PI489777)SNP_21488 | 2848 | G | A | 34  | 10 | --     | --        |
|            | Ca(ICCV2/PI489777)SNP_21489 | 3197 | A | G | 13  | 12 | --     | --        |
|            | Ca(ICCV2/PI489777)SNP_21490 | 3222 | G | A | 13  | 12 | --     | --        |
|            | Ca(ICCV2/PI489777)SNP_21491 | 3272 | G | C | 13  | 11 | --     | --        |
| CakTC28757 | Ca(ICCV2/PI489777)SNP_21492 | 436  | G | C | 3   | 6  | --     | --        |
| CakTC38827 | Ca(ICCV2/PI489777)SNP_21493 | 1173 | A | T | 7   | 9  | --     | --        |
|            | Ca(ICCV2/PI489777)SNP_21494 | 1255 | C | T | 6   | 10 | --     | --        |
|            | Ca(ICCV2/PI489777)SNP_21495 | 1259 | G | A | 4   | 9  | --     | --        |
| CakTC37811 | Ca(ICCV2/PI489777)SNP_21496 | 290  | G | T | 4   | 4  | --     | --        |
|            | Ca(ICCV2/PI489777)SNP_21497 | 332  | C | G | 3   | 4  | --     | --        |
|            | Ca(ICCV2/PI489777)SNP_21498 | 1039 | A | G | 9   | 3  | --     | --        |
|            | Ca(ICCV2/PI489777)SNP_21499 | 1174 | G | A | 7   | 3  | --     | --        |
| CakTC38914 | Ca(ICCV2/PI489777)SNP_21500 | 370  | T | G | 19  | 5  | --     | --        |
|            | Ca(ICCV2/PI489777)SNP_21501 | 559  | A | T | 17  | 7  | --     | --        |
| CakTC10421 | Ca(ICCV2/PI489777)SNP_21502 | 219  | T | C | 107 | 62 | --     | --        |
|            | Ca(ICCV2/PI489777)SNP_21503 | 1143 | A | C | 159 | 80 | --     | --        |
| CakTC24477 | Ca(ICCV2/PI489777)SNP_21504 | 104  | T | C | 21  | 7  | --     | --        |
|            | Ca(ICCV2/PI489777)SNP_21505 | 105  | G | A | 20  | 6  | --     | --        |
|            | Ca(ICCV2/PI489777)SNP_21506 | 230  | T | A | 29  | 9  | --     | --        |
|            | Ca(ICCV2/PI489777)SNP_21507 | 291  | A | G | 32  | 14 | --     | --        |
|            | Ca(ICCV2/PI489777)SNP_21508 | 743  | C | T | 56  | 17 | --     | --        |
| CakTC39505 | Ca(ICCV2/PI489777)SNP_21509 | 238  | G | A | 12  | 4  | --     | --        |
|            | Ca(ICCV2/PI489777)SNP_21510 | 343  | G | C | 15  | 5  | --     | --        |
| CakTC24657 | Ca(ICCV2/PI489777)SNP_21511 | 228  | T | C | 20  | 14 | --     | --        |
|            | Ca(ICCV2/PI489777)SNP_21512 | 326  | G | T | 26  | 18 | --     | --        |
|            | Ca(ICCV2/PI489777)SNP_21513 | 1172 | G | C | 63  | 25 | --     | --        |
|            | Ca(ICCV2/PI489777)SNP_21514 | 2329 | G | A | 28  | 22 | --     | --        |
|            | Ca(ICCV2/PI489777)SNP_21515 | 3148 | C | A | 34  | 8  | --     | --        |
| CakTC41710 | Ca(ICCV2/PI489777)SNP_21516 | 48   | C | T | 7   | 5  | --     | --        |
|            | Ca(ICCV2/PI489777)SNP_21517 | 189  | T | G | 23  | 9  | --     | --        |
|            | Ca(ICCV2/PI489777)SNP_21518 | 479  | C | T | 34  | 11 | --     | --        |
|            | Ca(ICCV2/PI489777)SNP_21519 | 1070 | C | T | 34  | 5  | --     | --        |
|            | Ca(ICCV2/PI489777)SNP_21520 | 1185 | T | C | 31  | 5  | --     | --        |
|            | Ca(ICCV2/PI489777)SNP_21521 | 1514 | C | T | 16  | 13 | --     | --        |
|            | Ca(ICCV2/PI489777)SNP_21522 | 1721 | A | T | 22  | 13 | --     | --        |
|            | Ca(ICCV2/PI489777)SNP_21523 | 1739 | T | G | 21  | 12 | --     | --        |
|            | Ca(ICCV2/PI489777)SNP_21524 | 1946 | A | G | 24  | 9  | --     | --        |
|            | Ca(ICCV2/PI489777)SNP_21525 | 1969 | A | T | 24  | 10 | --     | --        |
|            | Ca(ICCV2/PI489777)SNP_21526 | 1980 | G | A | 21  | 10 | --     | --        |
|            | Ca(ICCV2/PI489777)SNP_21527 | 2285 | C | T | 13  | 3  | --     | --        |
| CakTC24726 | Ca(ICCV2/PI489777)SNP_21528 | 1324 | C | G | 20  | 9  | --     | --        |
| CakTC26360 | Ca(ICCV2/PI489777)SNP_21529 | 681  | C | T | 18  | 16 | --     | --        |

|            |                            |      |   |   |     |    |    |           |
|------------|----------------------------|------|---|---|-----|----|----|-----------|
|            | Ca(ICC2/PI489777)SNP_21530 | 1732 | G | A | 5   | 5  | -- | --        |
|            | Ca(ICC2/PI489777)SNP_21531 | 1733 | A | T | 4   | 5  | -- | --        |
| CakTC33668 | Ca(ICC2/PI489777)SNP_21532 | 926  | G | C | 3   | 4  | -- | --        |
|            | Ca(ICC2/PI489777)SNP_21533 | 1143 | A | T | 3   | 3  | -- | --        |
| CakTC41153 | Ca(ICC2/PI489777)SNP_21534 | 1490 | T | C | 20  | 4  | -- | --        |
|            | Ca(ICC2/PI489777)SNP_21535 | 1599 | G | A | 16  | 4  | -- | --        |
|            | Ca(ICC2/PI489777)SNP_21536 | 2068 | G | A | 20  | 5  | -- | --        |
| CakTC37453 | Ca(ICC2/PI489777)SNP_21537 | 390  | A | G | 11  | 7  | -- | --        |
|            | Ca(ICC2/PI489777)SNP_21538 | 820  | T | C | 9   | 9  | -- | --        |
|            | Ca(ICC2/PI489777)SNP_21539 | 874  | T | C | 9   | 8  | -- | --        |
| CakTC11631 | Ca(ICC2/PI489777)SNP_21540 | 85   | A | T | 9   | 6  | -- | --        |
|            | Ca(ICC2/PI489777)SNP_21541 | 110  | G | C | 10  | 5  | -- | --        |
|            | Ca(ICC2/PI489777)SNP_21542 | 490  | G | C | 16  | 6  | -- | --        |
|            | Ca(ICC2/PI489777)SNP_21543 | 756  | T | C | 5   | 5  | -- | --        |
|            | Ca(ICC2/PI489777)SNP_21544 | 796  | A | T | 5   | 5  | -- | --        |
| CakTC25951 | Ca(ICC2/PI489777)SNP_21545 | 230  | G | A | 24  | 24 | -- | --        |
|            | Ca(ICC2/PI489777)SNP_21546 | 689  | A | G | 98  | 54 | -- | --        |
|            | Ca(ICC2/PI489777)SNP_21547 | 950  | C | T | 98  | 38 | -- | --        |
| CakTC32161 | Ca(ICC2/PI489777)SNP_21548 | 355  | A | C | 9   | 6  | -- | --        |
|            | Ca(ICC2/PI489777)SNP_21549 | 421  | A | C | 14  | 5  | -- | --        |
|            | Ca(ICC2/PI489777)SNP_21550 | 454  | A | G | 13  | 6  | -- | --        |
|            | Ca(ICC2/PI489777)SNP_21551 | 726  | T | C | 22  | 8  | -- | --        |
|            | Ca(ICC2/PI489777)SNP_21552 | 1030 | A | G | 12  | 4  | -- | --        |
|            | Ca(ICC2/PI489777)SNP_21553 | 1110 | A | G | 10  | 4  | -- | --        |
| CakTC28480 | Ca(ICC2/PI489777)SNP_21554 | 919  | A | G | 12  | 3  | -- | --        |
|            | Ca(ICC2/PI489777)SNP_21555 | 1000 | A | G | 17  | 3  | -- | --        |
|            | Ca(ICC2/PI489777)SNP_21556 | 1040 | G | A | 15  | 3  | -- | --        |
| CakTC40910 | Ca(ICC2/PI489777)SNP_21557 | 1370 | C | T | 16  | 7  | -- | --        |
|            | Ca(ICC2/PI489777)SNP_21558 | 1475 | G | A | 20  | 10 | -- | --        |
|            | Ca(ICC2/PI489777)SNP_21559 | 1911 | C | T | 14  | 11 | -- | --        |
| CakTC26713 | Ca(ICC2/PI489777)SNP_21560 | 483  | C | T | 57  | 39 | -- | AP2-EREBP |
|            | Ca(ICC2/PI489777)SNP_21561 | 848  | G | A | 128 | 47 | -- | AP2-EREBP |
| CakTC11602 | Ca(ICC2/PI489777)SNP_21562 | 252  | G | C | 14  | 5  | -- | --        |
|            | Ca(ICC2/PI489777)SNP_21563 | 767  | A | G | 16  | 13 | -- | --        |
| CakTC25444 | Ca(ICC2/PI489777)SNP_21564 | 211  | C | A | 15  | 5  | -- | --        |
| CakTC30401 | Ca(ICC2/PI489777)SNP_21565 | 440  | T | C | 10  | 3  | -- | --        |
|            | Ca(ICC2/PI489777)SNP_21566 | 500  | A | T | 11  | 4  | -- | --        |
| CakTC40541 | Ca(ICC2/PI489777)SNP_21567 | 71   | T | G | 25  | 23 | -- | --        |
|            | Ca(ICC2/PI489777)SNP_21568 | 212  | T | C | 29  | 28 | -- | --        |
|            | Ca(ICC2/PI489777)SNP_21569 | 647  | C | T | 14  | 11 | -- | --        |
|            | Ca(ICC2/PI489777)SNP_21570 | 740  | T | C | 3   | 8  | -- | --        |
| CakTC29987 | Ca(ICC2/PI489777)SNP_21571 | 1477 | G | A | 18  | 4  | -- | --        |
|            | Ca(ICC2/PI489777)SNP_21572 | 2215 | T | G | 8   | 6  | -- | --        |
| CakTC34612 | Ca(ICC2/PI489777)SNP_21573 | 360  | C | G | 3   | 6  | -- | --        |
| CakTC36129 | Ca(ICC2/PI489777)SNP_21574 | 164  | G | A | 9   | 4  | -- | --        |
|            | Ca(ICC2/PI489777)SNP_21575 | 194  | G | A | 8   | 5  | -- | --        |
|            | Ca(ICC2/PI489777)SNP_21576 | 332  | A | T | 11  | 6  | -- | --        |
|            | Ca(ICC2/PI489777)SNP_21577 | 401  | T | C | 11  | 5  | -- | --        |
|            | Ca(ICC2/PI489777)SNP_21578 | 586  | G | A | 15  | 4  | -- | --        |
| CakTC42166 | Ca(ICC2/PI489777)SNP_21579 | 399  | A | G | 15  | 6  | -- | --        |
|            | Ca(ICC2/PI489777)SNP_21580 | 1903 | C | T | 5   | 22 | -- | --        |
|            | Ca(ICC2/PI489777)SNP_21581 | 1976 | A | G | 7   | 19 | -- | --        |
| CakTC27190 | Ca(ICC2/PI489777)SNP_21582 | 495  | T | A | 23  | 4  | -- | --        |
|            | Ca(ICC2/PI489777)SNP_21583 | 750  | A | G | 54  | 15 | -- | --        |
| CakTC28476 | Ca(ICC2/PI489777)SNP_21584 | 793  | A | G | 9   | 13 | -- | --        |
| CakTC09333 | Ca(ICC2/PI489777)SNP_21585 | 830  | G | A | 4   | 7  | -- | --        |
|            | Ca(ICC2/PI489777)SNP_21586 | 1063 | C | T | 13  | 3  | -- | --        |
| CakTC26268 | Ca(ICC2/PI489777)SNP_21587 | 1107 | G | A | 10  | 5  | -- | --        |
|            | Ca(ICC2/PI489777)SNP_21588 | 2149 | A | G | 5   | 4  | -- | --        |
| CakTC42893 | Ca(ICC2/PI489777)SNP_21589 | 630  | C | A | 29  | 15 | -- | --        |
|            | Ca(ICC2/PI489777)SNP_21590 | 678  | G | A | 28  | 15 | -- | --        |
|            | Ca(ICC2/PI489777)SNP_21591 | 755  | T | C | 14  | 4  | -- | --        |
|            | Ca(ICC2/PI489777)SNP_21592 | 802  | C | G | 9   | 4  | -- | --        |
| CakTC41875 | Ca(ICC2/PI489777)SNP_21593 | 157  | T | C | 6   | 3  | -- | --        |
|            | Ca(ICC2/PI489777)SNP_21594 | 537  | A | T | 11  | 3  | -- | --        |
| CakTC38209 | Ca(ICC2/PI489777)SNP_21595 | 212  | C | G | 24  | 6  | -- | --        |
|            | Ca(ICC2/PI489777)SNP_21596 | 385  | C | A | 25  | 5  | -- | --        |
|            | Ca(ICC2/PI489777)SNP_21597 | 625  | A | G | 9   | 3  | -- | --        |
| CakTC40778 | Ca(ICC2/PI489777)SNP_21598 | 1006 | G | T | 8   | 5  | -- | --        |
| CakTC39227 | Ca(ICC2/PI489777)SNP_21599 | 172  | C | G | 11  | 3  | -- | --        |
| CakTC10944 | Ca(ICC2/PI489777)SNP_21600 | 857  | T | C | 9   | 6  | -- | --        |
|            | Ca(ICC2/PI489777)SNP_21601 | 1044 | A | G | 6   | 4  | -- | --        |
|            | Ca(ICC2/PI489777)SNP_21602 | 1049 | A | G | 6   | 4  | -- | --        |
| CakTC23971 | Ca(ICC2/PI489777)SNP_21603 | 1169 | G | A | 8   | 5  | -- | --        |

|            |                            |      |   |   |    |    |    |         |
|------------|----------------------------|------|---|---|----|----|----|---------|
|            | Ca(ICC2/PI489777)SNP_21604 | 3147 | C | T | 10 | 12 | -- | --      |
|            | Ca(ICC2/PI489777)SNP_21605 | 3183 | C | T | 7  | 10 | -- | --      |
|            | Ca(ICC2/PI489777)SNP_21606 | 3342 | A | T | 18 | 7  | -- | --      |
| CakTC33742 | Ca(ICC2/PI489777)SNP_21607 | 512  | G | T | 3  | 12 | -- | CCAAT   |
| CakTC28157 | Ca(ICC2/PI489777)SNP_21608 | 307  | C | T | 4  | 3  | -- | ABI3VPI |
|            | Ca(ICC2/PI489777)SNP_21609 | 750  | A | G | 13 | 8  | -- | ABI3VPI |
|            | Ca(ICC2/PI489777)SNP_21610 | 833  | G | A | 22 | 6  | -- | ABI3VPI |
|            | Ca(ICC2/PI489777)SNP_21611 | 1106 | A | T | 29 | 14 | -- | ABI3VPI |
| CakTC33260 | Ca(ICC2/PI489777)SNP_21612 | 504  | A | C | 12 | 14 | -- | --      |
|            | Ca(ICC2/PI489777)SNP_21613 | 595  | T | C | 13 | 8  | -- | --      |
| CakTC22537 | Ca(ICC2/PI489777)SNP_21614 | 161  | C | T | 6  | 5  | -- | --      |
|            | Ca(ICC2/PI489777)SNP_21615 | 252  | C | G | 6  | 5  | -- | --      |
|            | Ca(ICC2/PI489777)SNP_21616 | 380  | C | A | 11 | 8  | -- | --      |
|            | Ca(ICC2/PI489777)SNP_21617 | 418  | T | A | 9  | 8  | -- | --      |
|            | Ca(ICC2/PI489777)SNP_21618 | 1114 | G | A | 24 | 12 | -- | --      |
|            | Ca(ICC2/PI489777)SNP_21619 | 1534 | C | T | 19 | 15 | -- | --      |
|            | Ca(ICC2/PI489777)SNP_21620 | 2965 | A | G | 3  | 3  | -- | --      |
| CakTC07528 | Ca(ICC2/PI489777)SNP_21621 | 77   | A | G | 18 | 4  | -- | --      |
|            | Ca(ICC2/PI489777)SNP_21622 | 116  | A | C | 22 | 6  | -- | --      |
|            | Ca(ICC2/PI489777)SNP_21623 | 170  | G | T | 24 | 6  | -- | --      |
|            | Ca(ICC2/PI489777)SNP_21624 | 221  | G | C | 26 | 8  | -- | --      |
|            | Ca(ICC2/PI489777)SNP_21625 | 245  | G | A | 26 | 7  | -- | --      |
|            | Ca(ICC2/PI489777)SNP_21626 | 398  | T | C | 23 | 5  | -- | --      |
|            | Ca(ICC2/PI489777)SNP_21627 | 734  | G | C | 18 | 7  | -- | --      |
|            | Ca(ICC2/PI489777)SNP_21628 | 749  | G | A | 17 | 7  | -- | --      |
| CakTC29902 | Ca(ICC2/PI489777)SNP_21629 | 1497 | C | T | 17 | 13 | -- | --      |
| CakTC33139 | Ca(ICC2/PI489777)SNP_21630 | 174  | T | C | 9  | 6  | -- | --      |
|            | Ca(ICC2/PI489777)SNP_21631 | 211  | G | A | 9  | 8  | -- | --      |
|            | Ca(ICC2/PI489777)SNP_21632 | 233  | A | G | 11 | 8  | -- | --      |
|            | Ca(ICC2/PI489777)SNP_21633 | 395  | C | T | 9  | 9  | -- | --      |
|            | Ca(ICC2/PI489777)SNP_21634 | 407  | T | C | 7  | 5  | -- | --      |
|            | Ca(ICC2/PI489777)SNP_21635 | 588  | A | G | 4  | 5  | -- | --      |
|            | Ca(ICC2/PI489777)SNP_21636 | 707  | G | A | 8  | 5  | -- | --      |
|            | Ca(ICC2/PI489777)SNP_21637 | 1895 | G | T | 12 | 9  | -- | --      |
| CakTC36677 | Ca(ICC2/PI489777)SNP_21638 | 142  | C | T | 12 | 3  | -- | TPR     |
|            | Ca(ICC2/PI489777)SNP_21639 | 184  | G | A | 13 | 3  | -- | TPR     |
|            | Ca(ICC2/PI489777)SNP_21640 | 496  | G | C | 13 | 6  | -- | TPR     |
|            | Ca(ICC2/PI489777)SNP_21641 | 1969 | G | A | 14 | 5  | -- | TPR     |
|            | Ca(ICC2/PI489777)SNP_21642 | 1995 | C | T | 12 | 5  | -- | TPR     |
| CakTC40709 | Ca(ICC2/PI489777)SNP_21643 | 1198 | T | C | 38 | 14 | -- | --      |
|            | Ca(ICC2/PI489777)SNP_21644 | 1803 | T | G | 21 | 11 | -- | --      |
| CakTC33844 | Ca(ICC2/PI489777)SNP_21645 | 443  | T | C | 5  | 6  | -- | --      |
| CakTC26545 | Ca(ICC2/PI489777)SNP_21646 | 591  | C | T | 53 | 25 | -- | --      |
|            | Ca(ICC2/PI489777)SNP_21647 | 631  | T | C | 42 | 23 | -- | --      |
|            | Ca(ICC2/PI489777)SNP_21648 | 927  | A | G | 65 | 12 | -- | --      |
| CakTC22931 | Ca(ICC2/PI489777)SNP_21649 | 476  | T | C | 7  | 35 | -- | --      |
|            | Ca(ICC2/PI489777)SNP_21650 | 701  | C | A | 13 | 24 | -- | --      |
|            | Ca(ICC2/PI489777)SNP_21651 | 925  | A | T | 7  | 6  | -- | --      |
|            | Ca(ICC2/PI489777)SNP_21652 | 984  | G | T | 6  | 5  | -- | --      |
|            | Ca(ICC2/PI489777)SNP_21653 | 2223 | C | T | 5  | 6  | -- | --      |
| CakTC40779 | Ca(ICC2/PI489777)SNP_21654 | 1121 | A | G | 6  | 13 | -- | BSD     |
|            | Ca(ICC2/PI489777)SNP_21655 | 1626 | C | T | 9  | 8  | -- | BSD     |
| CakTC28638 | Ca(ICC2/PI489777)SNP_21656 | 307  | C | T | 93 | 53 | -- | --      |
| CakTC43154 | Ca(ICC2/PI489777)SNP_21657 | 96   | G | C | 4  | 7  | -- | --      |
|            | Ca(ICC2/PI489777)SNP_21658 | 97   | C | T | 5  | 7  | -- | --      |
|            | Ca(ICC2/PI489777)SNP_21659 | 124  | C | T | 5  | 7  | -- | --      |
|            | Ca(ICC2/PI489777)SNP_21660 | 190  | G | A | 5  | 6  | -- | --      |
|            | Ca(ICC2/PI489777)SNP_21661 | 252  | A | G | 5  | 6  | -- | --      |
|            | Ca(ICC2/PI489777)SNP_21662 | 788  | A | G | 3  | 4  | -- | --      |
| CakTC01820 | Ca(ICC2/PI489777)SNP_21663 | 423  | G | A | 5  | 7  | -- | --      |
|            | Ca(ICC2/PI489777)SNP_21664 | 786  | C | G | 3  | 3  | -- | --      |
| CakTC31256 | Ca(ICC2/PI489777)SNP_21665 | 449  | A | G | 4  | 6  | -- | --      |
|            | Ca(ICC2/PI489777)SNP_21666 | 877  | T | C | 9  | 5  | -- | --      |
|            | Ca(ICC2/PI489777)SNP_21667 | 893  | T | C | 8  | 4  | -- | --      |
| CakTC43143 | Ca(ICC2/PI489777)SNP_21668 | 118  | C | A | 7  | 3  | -- | --      |
| CakTC42985 | Ca(ICC2/PI489777)SNP_21669 | 52   | A | G | 3  | 4  | -- | --      |
|            | Ca(ICC2/PI489777)SNP_21670 | 810  | C | A | 48 | 21 | -- | --      |
|            | Ca(ICC2/PI489777)SNP_21671 | 1215 | T | C | 27 | 9  | -- | --      |
|            | Ca(ICC2/PI489777)SNP_21672 | 1427 | C | G | 35 | 15 | -- | --      |
|            | Ca(ICC2/PI489777)SNP_21673 | 1449 | A | G | 33 | 17 | -- | --      |
| CakTC32465 | Ca(ICC2/PI489777)SNP_21674 | 345  | T | G | 22 | 16 | -- | --      |
|            | Ca(ICC2/PI489777)SNP_21675 | 494  | A | G | 20 | 30 | -- | --      |
|            | Ca(ICC2/PI489777)SNP_21676 | 796  | G | A | 25 | 32 | -- | --      |
|            | Ca(ICC2/PI489777)SNP_21677 | 1834 | T | C | 19 | 15 | -- | --      |

|            |                            |      |   |   |    |    |        |      |
|------------|----------------------------|------|---|---|----|----|--------|------|
|            | Ca(ICC2/PI489777)SNP_21678 | 1993 | T | A | 17 | 12 | --     | --   |
|            | Ca(ICC2/PI489777)SNP_21679 | 2047 | C | T | 18 | 11 | --     | --   |
| CakTC41704 | Ca(ICC2/PI489777)SNP_21680 | 1310 | C | T | 12 | 5  | --     | --   |
| CakTC40266 | Ca(ICC2/PI489777)SNP_21681 | 503  | G | C | 5  | 5  | --     | GRAS |
|            | Ca(ICC2/PI489777)SNP_21682 | 540  | C | T | 9  | 5  | --     | GRAS |
|            | Ca(ICC2/PI489777)SNP_21683 | 885  | C | T | 12 | 6  | --     | GRAS |
|            | Ca(ICC2/PI489777)SNP_21684 | 1041 | G | A | 8  | 6  | --     | GRAS |
|            | Ca(ICC2/PI489777)SNP_21685 | 1104 | A | G | 11 | 5  | --     | GRAS |
|            | Ca(ICC2/PI489777)SNP_21686 | 1182 | G | T | 11 | 4  | --     | GRAS |
|            | Ca(ICC2/PI489777)SNP_21687 | 1464 | G | C | 15 | 6  | --     | GRAS |
|            | Ca(ICC2/PI489777)SNP_21688 | 1686 | C | G | 11 | 5  | --     | GRAS |
| CakTC08914 | Ca(ICC2/PI489777)SNP_21689 | 696  | T | C | 6  | 3  | --     | --   |
| CakTC29945 | Ca(ICC2/PI489777)SNP_21690 | 1475 | T | C | 6  | 4  | --     | --   |
| CakTC38820 | Ca(ICC2/PI489777)SNP_21691 | 290  | T | C | 3  | 3  | --     | --   |
|            | Ca(ICC2/PI489777)SNP_21692 | 901  | G | C | 7  | 5  | --     | --   |
| CakTC26550 | Ca(ICC2/PI489777)SNP_21693 | 332  | C | T | 13 | 5  | Flower | bud  |
|            | Ca(ICC2/PI489777)SNP_21694 | 1020 | A | G | 10 | 4  | Flower | bud  |
|            | Ca(ICC2/PI489777)SNP_21695 | 1231 | T | C | 8  | 5  | Flower | bud  |
|            | Ca(ICC2/PI489777)SNP_21696 | 1236 | T | C | 9  | 5  | Flower | bud  |
|            | Ca(ICC2/PI489777)SNP_21697 | 1762 | A | G | 6  | 3  | Flower | bud  |
| CakTC10294 | Ca(ICC2/PI489777)SNP_21698 | 297  | C | T | 5  | 4  | --     | --   |
| CakTC07812 | Ca(ICC2/PI489777)SNP_21699 | 1352 | T | C | 4  | 3  | --     | RB   |
| CakTC42639 | Ca(ICC2/PI489777)SNP_21700 | 257  | C | T | 30 | 10 | --     | --   |
|            | Ca(ICC2/PI489777)SNP_21701 | 266  | T | C | 36 | 10 | --     | --   |
| CakTC19756 | Ca(ICC2/PI489777)SNP_21702 | 198  | A | G | 3  | 3  | Shoot  | --   |
|            | Ca(ICC2/PI489777)SNP_21703 | 318  | A | C | 3  | 4  | Shoot  | --   |
|            | Ca(ICC2/PI489777)SNP_21704 | 378  | C | T | 5  | 6  | Shoot  | --   |
|            | Ca(ICC2/PI489777)SNP_21705 | 417  | C | T | 4  | 5  | Shoot  | --   |
|            | Ca(ICC2/PI489777)SNP_21706 | 420  | T | C | 4  | 5  | Shoot  | --   |
|            | Ca(ICC2/PI489777)SNP_21707 | 570  | A | G | 5  | 7  | Shoot  | --   |
|            | Ca(ICC2/PI489777)SNP_21708 | 619  | T | C | 6  | 5  | Shoot  | --   |
|            | Ca(ICC2/PI489777)SNP_21709 | 732  | C | T | 5  | 3  | Shoot  | --   |
| CakTC40102 | Ca(ICC2/PI489777)SNP_21710 | 1145 | T | G | 3  | 3  | --     | --   |
| CakTC39124 | Ca(ICC2/PI489777)SNP_21711 | 784  | C | T | 20 | 3  | --     | --   |
|            | Ca(ICC2/PI489777)SNP_21712 | 1349 | G | A | 15 | 7  | --     | --   |
|            | Ca(ICC2/PI489777)SNP_21713 | 1400 | A | G | 14 | 11 | --     | --   |
|            | Ca(ICC2/PI489777)SNP_21714 | 1412 | A | T | 14 | 9  | --     | --   |
|            | Ca(ICC2/PI489777)SNP_21715 | 1421 | C | T | 13 | 8  | --     | --   |
| CakTC38092 | Ca(ICC2/PI489777)SNP_21716 | 839  | T | C | 3  | 5  | --     | MADS |
| CakTC41141 | Ca(ICC2/PI489777)SNP_21717 | 130  | C | G | 6  | 7  | --     | --   |
|            | Ca(ICC2/PI489777)SNP_21718 | 269  | C | T | 17 | 11 | --     | --   |
|            | Ca(ICC2/PI489777)SNP_21719 | 352  | A | G | 28 | 18 | --     | --   |
|            | Ca(ICC2/PI489777)SNP_21720 | 1774 | G | A | 13 | 29 | --     | --   |
|            | Ca(ICC2/PI489777)SNP_21721 | 1906 | A | G | 24 | 24 | --     | --   |
|            | Ca(ICC2/PI489777)SNP_21722 | 1918 | C | G | 25 | 27 | --     | --   |
| CakTC40042 | Ca(ICC2/PI489777)SNP_21723 | 895  | G | A | 22 | 7  | --     | --   |
|            | Ca(ICC2/PI489777)SNP_21724 | 1027 | T | A | 23 | 5  | --     | --   |
|            | Ca(ICC2/PI489777)SNP_21725 | 1183 | A | T | 10 | 3  | --     | --   |
| CakTC43291 | Ca(ICC2/PI489777)SNP_21726 | 639  | A | G | 13 | 9  | --     | --   |
| CakTC42528 | Ca(ICC2/PI489777)SNP_21727 | 324  | G | A | 5  | 3  | --     | --   |
|            | Ca(ICC2/PI489777)SNP_21728 | 361  | G | T | 6  | 3  | --     | --   |
|            | Ca(ICC2/PI489777)SNP_21729 | 636  | T | A | 4  | 8  | --     | --   |
|            | Ca(ICC2/PI489777)SNP_21730 | 708  | A | G | 4  | 6  | --     | --   |
|            | Ca(ICC2/PI489777)SNP_21731 | 807  | T | C | 7  | 5  | --     | --   |
| CakTC34673 | Ca(ICC2/PI489777)SNP_21732 | 325  | C | A | 11 | 10 | --     | --   |
|            | Ca(ICC2/PI489777)SNP_21733 | 365  | A | T | 9  | 8  | --     | --   |
|            | Ca(ICC2/PI489777)SNP_21734 | 498  | A | C | 9  | 6  | --     | --   |
|            | Ca(ICC2/PI489777)SNP_21735 | 519  | T | C | 8  | 3  | --     | --   |
|            | Ca(ICC2/PI489777)SNP_21736 | 690  | C | T | 7  | 5  | --     | --   |
|            | Ca(ICC2/PI489777)SNP_21737 | 772  | G | T | 7  | 5  | --     | --   |
|            | Ca(ICC2/PI489777)SNP_21738 | 936  | G | A | 10 | 5  | --     | --   |
|            | Ca(ICC2/PI489777)SNP_21739 | 1059 | T | G | 12 | 7  | --     | --   |
|            | Ca(ICC2/PI489777)SNP_21740 | 1306 | C | A | 19 | 7  | --     | --   |
|            | Ca(ICC2/PI489777)SNP_21741 | 1478 | T | C | 12 | 5  | --     | --   |
|            | Ca(ICC2/PI489777)SNP_21742 | 1588 | G | A | 11 | 13 | --     | --   |
|            | Ca(ICC2/PI489777)SNP_21743 | 2040 | G | C | 13 | 20 | --     | --   |
|            | Ca(ICC2/PI489777)SNP_21744 | 2283 | A | G | 16 | 9  | --     | --   |
|            | Ca(ICC2/PI489777)SNP_21745 | 2520 | T | C | 11 | 16 | --     | --   |
|            | Ca(ICC2/PI489777)SNP_21746 | 2539 | G | A | 6  | 17 | --     | --   |
|            | Ca(ICC2/PI489777)SNP_21747 | 2613 | G | A | 12 | 19 | --     | --   |
|            | Ca(ICC2/PI489777)SNP_21748 | 2691 | T | C | 13 | 17 | --     | --   |
|            | Ca(ICC2/PI489777)SNP_21749 | 2715 | T | C | 15 | 18 | --     | --   |
|            | Ca(ICC2/PI489777)SNP_21750 | 2832 | T | C | 16 | 16 | --     | --   |
|            | Ca(ICC2/PI489777)SNP_21751 | 2841 | C | G | 17 | 16 | --     | --   |

|            |                            |      |   |   |    |    |           |           |
|------------|----------------------------|------|---|---|----|----|-----------|-----------|
|            | Ca(ICC2/PI489777)SNP_21752 | 2931 | C | A | 15 | 16 | --        | --        |
|            | Ca(ICC2/PI489777)SNP_21753 | 2958 | T | C | 18 | 17 | --        | --        |
|            | Ca(ICC2/PI489777)SNP_21754 | 3273 | T | A | 11 | 12 | --        | --        |
|            | Ca(ICC2/PI489777)SNP_21755 | 3330 | T | A | 5  | 12 | --        | --        |
| CakTC37801 | Ca(ICC2/PI489777)SNP_21756 | 114  | A | T | 32 | 6  | --        | --        |
|            | Ca(ICC2/PI489777)SNP_21757 | 151  | A | G | 36 | 8  | --        | --        |
|            | Ca(ICC2/PI489777)SNP_21758 | 243  | G | A | 41 | 9  | --        | --        |
|            | Ca(ICC2/PI489777)SNP_21759 | 322  | A | G | 39 | 11 | --        | --        |
|            | Ca(ICC2/PI489777)SNP_21760 | 394  | T | C | 39 | 7  | --        | --        |
|            | Ca(ICC2/PI489777)SNP_21761 | 594  | T | G | 23 | 6  | --        | --        |
|            | Ca(ICC2/PI489777)SNP_21762 | 884  | A | G | 9  | 4  | --        | --        |
| CakTC38921 | Ca(ICC2/PI489777)SNP_21763 | 1672 | T | C | 4  | 3  | Flower    | bud       |
| CakTC24695 | Ca(ICC2/PI489777)SNP_21764 | 277  | G | C | 15 | 9  | Mature    | Leaf      |
|            | Ca(ICC2/PI489777)SNP_21765 | 496  | C | T | 20 | 10 | Mature    | Leaf      |
|            | Ca(ICC2/PI489777)SNP_21766 | 554  | G | C | 20 | 11 | Mature    | Leaf      |
|            | Ca(ICC2/PI489777)SNP_21767 | 639  | G | A | 16 | 6  | Mature    | Leaf      |
| CakTC29951 | Ca(ICC2/PI489777)SNP_21768 | 493  | C | T | 11 | 4  | Shoot     | HB        |
|            | Ca(ICC2/PI489777)SNP_21769 | 991  | T | A | 12 | 3  | Shoot     | HB        |
|            | Ca(ICC2/PI489777)SNP_21770 | 1600 | T | C | 4  | 3  | Shoot     | HB        |
| CakTC41707 | Ca(ICC2/PI489777)SNP_21771 | 542  | A | G | 29 | 20 | --        | --        |
|            | Ca(ICC2/PI489777)SNP_21772 | 866  | G | A | 23 | 25 | --        | --        |
|            | Ca(ICC2/PI489777)SNP_21773 | 1865 | G | C | 15 | 6  | --        | --        |
|            | Ca(ICC2/PI489777)SNP_21774 | 1910 | G | C | 8  | 4  | --        | --        |
|            | Ca(ICC2/PI489777)SNP_21775 | 2214 | C | T | 4  | 7  | --        | --        |
|            | Ca(ICC2/PI489777)SNP_21776 | 2265 | C | A | 9  | 8  | --        | --        |
|            | Ca(ICC2/PI489777)SNP_21777 | 2980 | G | C | 10 | 13 | --        | --        |
|            | Ca(ICC2/PI489777)SNP_21778 | 3063 | G | A | 8  | 12 | --        | --        |
|            | Ca(ICC2/PI489777)SNP_21779 | 3366 | C | T | 5  | 8  | --        | --        |
|            | Ca(ICC2/PI489777)SNP_21780 | 3786 | C | T | 4  | 6  | --        | --        |
|            | Ca(ICC2/PI489777)SNP_21781 | 3897 | T | C | 5  | 5  | --        | --        |
|            | Ca(ICC2/PI489777)SNP_21782 | 4016 | G | A | 7  | 5  | --        | --        |
| CakTC40342 | Ca(ICC2/PI489777)SNP_21783 | 676  | C | T | 18 | 3  | --        | --        |
|            | Ca(ICC2/PI489777)SNP_21784 | 1890 | G | C | 14 | 5  | --        | --        |
| CakTC11672 | Ca(ICC2/PI489777)SNP_21785 | 924  | T | G | 3  | 6  | --        | --        |
|            | Ca(ICC2/PI489777)SNP_21786 | 950  | T | C | 4  | 6  | --        | --        |
| CakTC36699 | Ca(ICC2/PI489777)SNP_21787 | 1110 | G | T | 16 | 3  | --        | --        |
|            | Ca(ICC2/PI489777)SNP_21788 | 1343 | C | T | 17 | 9  | --        | --        |
|            | Ca(ICC2/PI489777)SNP_21789 | 1407 | A | G | 16 | 9  | --        | --        |
|            | Ca(ICC2/PI489777)SNP_21790 | 1527 | C | T | 8  | 8  | --        | --        |
|            | Ca(ICC2/PI489777)SNP_21791 | 1910 | G | A | 6  | 3  | --        | --        |
|            | Ca(ICC2/PI489777)SNP_21792 | 1990 | G | A | 7  | 3  | --        | --        |
|            | Ca(ICC2/PI489777)SNP_21793 | 2236 | T | C | 8  | 3  | --        | --        |
|            | Ca(ICC2/PI489777)SNP_21794 | 2240 | C | T | 8  | 3  | --        | --        |
|            | Ca(ICC2/PI489777)SNP_21795 | 2259 | A | G | 8  | 3  | --        | --        |
| CakTC26152 | Ca(ICC2/PI489777)SNP_21796 | 331  | A | C | 19 | 5  | --        | --        |
|            | Ca(ICC2/PI489777)SNP_21797 | 1486 | A | G | 15 | 4  | --        | --        |
|            | Ca(ICC2/PI489777)SNP_21798 | 3412 | G | A | 13 | 5  | --        | --        |
| CakTC32701 | Ca(ICC2/PI489777)SNP_21799 | 658  | C | T | 9  | 6  | --        | --        |
|            | Ca(ICC2/PI489777)SNP_21800 | 885  | G | A | 13 | 6  | --        | --        |
|            | Ca(ICC2/PI489777)SNP_21801 | 1825 | T | G | 4  | 4  | --        | --        |
|            | Ca(ICC2/PI489777)SNP_21802 | 1831 | C | G | 5  | 4  | --        | --        |
|            | Ca(ICC2/PI489777)SNP_21803 | 1977 | T | C | 6  | 7  | --        | --        |
| CakTC41486 | Ca(ICC2/PI489777)SNP_21804 | 199  | A | G | 3  | 8  | --        | --        |
| CakTC40524 | Ca(ICC2/PI489777)SNP_21805 | 94   | G | A | 12 | 4  | Young_pod | --        |
|            | Ca(ICC2/PI489777)SNP_21806 | 142  | A | C | 13 | 3  | Young_pod | --        |
|            | Ca(ICC2/PI489777)SNP_21807 | 355  | A | C | 17 | 7  | Young_pod | --        |
|            | Ca(ICC2/PI489777)SNP_21808 | 369  | G | A | 17 | 7  | Young_pod | --        |
|            | Ca(ICC2/PI489777)SNP_21809 | 551  | C | A | 8  | 6  | Young_pod | --        |
|            | Ca(ICC2/PI489777)SNP_21810 | 599  | T | C | 6  | 5  | Young_pod | --        |
| CakTC41010 | Ca(ICC2/PI489777)SNP_21811 | 380  | A | G | 7  | 6  | --        | --        |
|            | Ca(ICC2/PI489777)SNP_21812 | 498  | T | A | 9  | 4  | --        | --        |
|            | Ca(ICC2/PI489777)SNP_21813 | 542  | T | C | 8  | 7  | --        | --        |
|            | Ca(ICC2/PI489777)SNP_21814 | 563  | A | T | 10 | 8  | --        | --        |
|            | Ca(ICC2/PI489777)SNP_21815 | 726  | T | C | 9  | 3  | --        | --        |
| CakTC25512 | Ca(ICC2/PI489777)SNP_21816 | 1331 | A | G | 28 | 11 | --        | --        |
| CakTC40580 | Ca(ICC2/PI489777)SNP_21817 | 186  | T | C | 3  | 4  | --        | --        |
| CakTC38388 | Ca(ICC2/PI489777)SNP_21818 | 226  | G | A | 19 | 9  | --        | --        |
|            | Ca(ICC2/PI489777)SNP_21819 | 456  | C | T | 11 | 7  | --        | --        |
|            | Ca(ICC2/PI489777)SNP_21820 | 491  | C | T | 16 | 6  | --        | --        |
|            | Ca(ICC2/PI489777)SNP_21821 | 572  | G | A | 22 | 6  | --        | --        |
|            | Ca(ICC2/PI489777)SNP_21822 | 624  | T | C | 24 | 5  | --        | --        |
|            | Ca(ICC2/PI489777)SNP_21823 | 979  | C | T | 22 | 6  | --        | --        |
| CakTC43283 | Ca(ICC2/PI489777)SNP_21824 | 385  | A | C | 54 | 14 | --        | AP2-EREBP |
|            | Ca(ICC2/PI489777)SNP_21825 | 535  | T | G | 43 | 12 | --        | AP2-EREBP |

|            |                            |      |   |   |     |    |           |           |
|------------|----------------------------|------|---|---|-----|----|-----------|-----------|
|            | Ca(ICC2/PI489777)SNP_21826 | 811  | G | A | 34  | 5  | --        | AP2-EREBP |
|            | Ca(ICC2/PI489777)SNP_21827 | 832  | C | T | 22  | 6  | --        | AP2-EREBP |
| CakTC23710 | Ca(ICC2/PI489777)SNP_21828 | 1681 | G | A | 10  | 3  | --        | --        |
| CakTC12635 | Ca(ICC2/PI489777)SNP_21829 | 223  | A | G | 16  | 7  | --        | --        |
|            | Ca(ICC2/PI489777)SNP_21830 | 670  | C | T | 6   | 7  | --        | --        |
| CakTC29007 | Ca(ICC2/PI489777)SNP_21831 | 1354 | T | G | 20  | 9  | --        | --        |
| CakTC27202 | Ca(ICC2/PI489777)SNP_21832 | 446  | A | G | 11  | 4  | Root      | --        |
| CakTC25910 | Ca(ICC2/PI489777)SNP_21833 | 615  | G | A | 140 | 43 | --        | --        |
|            | Ca(ICC2/PI489777)SNP_21834 | 818  | C | T | 113 | 25 | --        | --        |
|            | Ca(ICC2/PI489777)SNP_21835 | 1177 | T | C | 78  | 31 | --        | --        |
|            | Ca(ICC2/PI489777)SNP_21836 | 1193 | A | G | 98  | 36 | --        | --        |
|            | Ca(ICC2/PI489777)SNP_21837 | 1375 | C | T | 59  | 17 | --        | --        |
|            | Ca(ICC2/PI489777)SNP_21838 | 1733 | T | C | 41  | 9  | --        | --        |
|            | Ca(ICC2/PI489777)SNP_21839 | 1749 | C | T | 40  | 4  | --        | --        |
|            | Ca(ICC2/PI489777)SNP_21840 | 1769 | C | A | 39  | 6  | --        | --        |
|            | Ca(ICC2/PI489777)SNP_21841 | 1793 | A | T | 32  | 8  | --        | --        |
| CakTC35012 | Ca(ICC2/PI489777)SNP_21842 | 303  | A | T | 56  | 67 | --        | --        |
|            | Ca(ICC2/PI489777)SNP_21843 | 857  | G | C | 50  | 75 | --        | --        |
|            | Ca(ICC2/PI489777)SNP_21844 | 864  | G | A | 52  | 77 | --        | --        |
|            | Ca(ICC2/PI489777)SNP_21845 | 2055 | G | A | 49  | 51 | --        | --        |
| CakTC41117 | Ca(ICC2/PI489777)SNP_21846 | 99   | C | T | 4   | 6  | --        | --        |
|            | Ca(ICC2/PI489777)SNP_21847 | 426  | T | C | 10  | 8  | --        | --        |
| CakTC10934 | Ca(ICC2/PI489777)SNP_21848 | 894  | T | A | 5   | 6  | --        | --        |
|            | Ca(ICC2/PI489777)SNP_21849 | 906  | T | C | 5   | 6  | --        | --        |
|            | Ca(ICC2/PI489777)SNP_21850 | 1262 | C | T | 4   | 4  | --        | --        |
| CakTC24207 | Ca(ICC2/PI489777)SNP_21851 | 670  | G | T | 35  | 28 | --        | --        |
|            | Ca(ICC2/PI489777)SNP_21852 | 736  | C | G | 37  | 29 | --        | --        |
|            | Ca(ICC2/PI489777)SNP_21853 | 1185 | C | T | 79  | 34 | --        | --        |
|            | Ca(ICC2/PI489777)SNP_21854 | 1426 | T | C | 87  | 29 | --        | --        |
|            | Ca(ICC2/PI489777)SNP_21855 | 1709 | T | G | 93  | 25 | --        | --        |
|            | Ca(ICC2/PI489777)SNP_21856 | 1970 | A | G | 37  | 26 | --        | --        |
|            | Ca(ICC2/PI489777)SNP_21857 | 2115 | C | A | 84  | 34 | --        | --        |
|            | Ca(ICC2/PI489777)SNP_21858 | 2184 | A | G | 93  | 37 | --        | --        |
|            | Ca(ICC2/PI489777)SNP_21859 | 2277 | C | T | 101 | 33 | --        | --        |
|            | Ca(ICC2/PI489777)SNP_21860 | 2418 | A | G | 105 | 22 | --        | --        |
|            | Ca(ICC2/PI489777)SNP_21861 | 2493 | G | C | 90  | 24 | --        | --        |
|            | Ca(ICC2/PI489777)SNP_21862 | 2547 | C | G | 63  | 16 | --        | --        |
|            | Ca(ICC2/PI489777)SNP_21863 | 2608 | A | C | 62  | 18 | --        | --        |
| CakTC02511 | Ca(ICC2/PI489777)SNP_21864 | 309  | T | C | 7   | 12 | --        | --        |
|            | Ca(ICC2/PI489777)SNP_21865 | 312  | T | C | 7   | 12 | --        | --        |
|            | Ca(ICC2/PI489777)SNP_21866 | 327  | G | C | 9   | 12 | --        | --        |
| CakTC36982 | Ca(ICC2/PI489777)SNP_21867 | 3169 | A | T | 50  | 20 | --        | --        |
| CakTC36654 | Ca(ICC2/PI489777)SNP_21868 | 1540 | A | G | 7   | 4  | --        | --        |
| CakTC32998 | Ca(ICC2/PI489777)SNP_21869 | 186  | T | C | 8   | 3  | --        | --        |
| CakTC36880 | Ca(ICC2/PI489777)SNP_21870 | 385  | T | C | 12  | 8  | --        | --        |
|            | Ca(ICC2/PI489777)SNP_21871 | 1363 | C | T | 6   | 10 | --        | --        |
|            | Ca(ICC2/PI489777)SNP_21872 | 2401 | T | C | 14  | 5  | --        | --        |
| CakTC34303 | Ca(ICC2/PI489777)SNP_21873 | 1531 | G | A | 7   | 5  | --        | --        |
|            | Ca(ICC2/PI489777)SNP_21874 | 1815 | A | G | 16  | 6  | --        | --        |
| CakTC06423 | Ca(ICC2/PI489777)SNP_21875 | 330  | G | A | 10  | 4  | --        | TPR       |
|            | Ca(ICC2/PI489777)SNP_21876 | 1625 | T | C | 6   | 4  | --        | TPR       |
| CakTC13458 | Ca(ICC2/PI489777)SNP_21877 | 279  | T | C | 5   | 3  | --        | --        |
|            | Ca(ICC2/PI489777)SNP_21878 | 281  | T | A | 5   | 3  | --        | --        |
| CakTC42746 | Ca(ICC2/PI489777)SNP_21879 | 225  | C | T | 11  | 21 | --        | --        |
|            | Ca(ICC2/PI489777)SNP_21880 | 486  | C | T | 11  | 8  | --        | --        |
| CakTC41189 | Ca(ICC2/PI489777)SNP_21881 | 451  | G | A | 28  | 8  | --        | --        |
|            | Ca(ICC2/PI489777)SNP_21882 | 505  | C | A | 57  | 8  | --        | --        |
|            | Ca(ICC2/PI489777)SNP_21883 | 591  | G | T | 167 | 16 | --        | --        |
| CakTC29186 | Ca(ICC2/PI489777)SNP_21884 | 438  | C | T | 9   | 3  | --        | CCHC      |
|            | Ca(ICC2/PI489777)SNP_21885 | 806  | T | G | 11  | 9  | --        | CCHC      |
| CakTC26796 | Ca(ICC2/PI489777)SNP_21886 | 353  | T | C | 33  | 21 | --        | --        |
|            | Ca(ICC2/PI489777)SNP_21887 | 524  | A | G | 35  | 23 | --        | --        |
| CakTC24994 | Ca(ICC2/PI489777)SNP_21888 | 1855 | G | A | 13  | 5  | --        | --        |
|            | Ca(ICC2/PI489777)SNP_21889 | 1983 | G | C | 10  | 3  | --        | --        |
| CakTC39762 | Ca(ICC2/PI489777)SNP_21890 | 537  | A | T | 8   | 8  | --        | --        |
|            | Ca(ICC2/PI489777)SNP_21891 | 550  | C | T | 11  | 10 | --        | --        |
| CakTC39201 | Ca(ICC2/PI489777)SNP_21892 | 2443 | T | C | 3   | 6  | Young_pod | --        |
| CakTC24909 | Ca(ICC2/PI489777)SNP_21893 | 838  | C | T | 8   | 5  | --        | --        |
| CakTC38316 | Ca(ICC2/PI489777)SNP_21894 | 1527 | G | A | 6   | 3  | --        | --        |
|            | Ca(ICC2/PI489777)SNP_21895 | 1593 | C | T | 7   | 3  | --        | --        |
| CakTC25474 | Ca(ICC2/PI489777)SNP_21896 | 800  | C | G | 95  | 43 | --        | --        |
|            | Ca(ICC2/PI489777)SNP_21897 | 993  | T | C | 88  | 50 | --        | --        |
|            | Ca(ICC2/PI489777)SNP_21898 | 1006 | C | T | 83  | 43 | --        | --        |
|            | Ca(ICC2/PI489777)SNP_21899 | 1052 | C | A | 93  | 40 | --        | --        |



|            |                            |      |   |   |     |    |           |       |
|------------|----------------------------|------|---|---|-----|----|-----------|-------|
|            | Ca(ICC2/PI489777)SNP_21900 | 1057 | T | G | 95  | 47 | --        | --    |
|            | Ca(ICC2/PI489777)SNP_21901 | 1599 | C | T | 82  | 12 | --        | --    |
|            | Ca(ICC2/PI489777)SNP_21902 | 2239 | G | T | 101 | 29 | --        | --    |
|            | Ca(ICC2/PI489777)SNP_21903 | 2282 | C | A | 102 | 31 | --        | --    |
| CakTC41324 | Ca(ICC2/PI489777)SNP_21904 | 185  | C | T | 12  | 4  | --        | --    |
|            | Ca(ICC2/PI489777)SNP_21905 | 2260 | C | A | 17  | 12 | --        | --    |
|            | Ca(ICC2/PI489777)SNP_21906 | 2425 | G | T | 4   | 3  | --        | --    |
| CakTC42282 | Ca(ICC2/PI489777)SNP_21907 | 88   | C | T | 12  | 4  | --        | --    |
|            | Ca(ICC2/PI489777)SNP_21908 | 622  | G | A | 56  | 46 | --        | --    |
|            | Ca(ICC2/PI489777)SNP_21909 | 819  | T | A | 11  | 3  | --        | --    |
| CakTC40882 | Ca(ICC2/PI489777)SNP_21910 | 362  | C | T | 21  | 8  | --        | --    |
| CakTC24986 | Ca(ICC2/PI489777)SNP_21911 | 277  | A | G | 5   | 10 | --        | --    |
|            | Ca(ICC2/PI489777)SNP_21912 | 367  | C | T | 7   | 11 | --        | --    |
|            | Ca(ICC2/PI489777)SNP_21913 | 451  | G | A | 6   | 9  | --        | --    |
|            | Ca(ICC2/PI489777)SNP_21914 | 456  | A | G | 7   | 10 | --        | --    |
|            | Ca(ICC2/PI489777)SNP_21915 | 622  | C | T | 5   | 9  | --        | --    |
| CakTC33147 | Ca(ICC2/PI489777)SNP_21916 | 1219 | T | C | 4   | 4  | --        | --    |
|            | Ca(ICC2/PI489777)SNP_21917 | 1577 | C | T | 3   | 4  | --        | --    |
|            | Ca(ICC2/PI489777)SNP_21918 | 2375 | G | C | 3   | 3  | --        | --    |
|            | Ca(ICC2/PI489777)SNP_21919 | 2502 | G | A | 3   | 4  | --        | --    |
| CakTC09541 | Ca(ICC2/PI489777)SNP_21920 | 303  | A | G | 7   | 5  | --        | --    |
|            | Ca(ICC2/PI489777)SNP_21921 | 512  | C | T | 14  | 10 | --        | --    |
|            | Ca(ICC2/PI489777)SNP_21922 | 547  | T | G | 12  | 9  | --        | --    |
| CakTC35266 | Ca(ICC2/PI489777)SNP_21923 | 1268 | G | T | 35  | 23 | --        | --    |
|            | Ca(ICC2/PI489777)SNP_21924 | 2082 | A | G | 35  | 21 | --        | --    |
|            | Ca(ICC2/PI489777)SNP_21925 | 2093 | A | G | 38  | 19 | --        | --    |
|            | Ca(ICC2/PI489777)SNP_21926 | 2835 | A | G | 31  | 3  | --        | --    |
|            | Ca(ICC2/PI489777)SNP_21927 | 3138 | C | T | 15  | 15 | --        | --    |
|            | Ca(ICC2/PI489777)SNP_21928 | 3228 | T | G | 14  | 14 | --        | --    |
|            | Ca(ICC2/PI489777)SNP_21929 | 3314 | G | A | 18  | 15 | --        | --    |
|            | Ca(ICC2/PI489777)SNP_21930 | 3639 | A | G | 10  | 10 | --        | --    |
| CakTC33810 | Ca(ICC2/PI489777)SNP_21931 | 231  | A | T | 39  | 9  | --        | --    |
|            | Ca(ICC2/PI489777)SNP_21932 | 412  | C | T | 73  | 31 | --        | --    |
|            | Ca(ICC2/PI489777)SNP_21933 | 432  | G | A | 80  | 36 | --        | --    |
|            | Ca(ICC2/PI489777)SNP_21934 | 2199 | C | T | 39  | 43 | --        | --    |
|            | Ca(ICC2/PI489777)SNP_21935 | 2224 | G | C | 34  | 34 | --        | --    |
| CakTC27697 | Ca(ICC2/PI489777)SNP_21936 | 888  | A | G | 7   | 3  | --        | --    |
|            | Ca(ICC2/PI489777)SNP_21937 | 1416 | C | T | 9   | 3  | --        | --    |
|            | Ca(ICC2/PI489777)SNP_21938 | 1594 | T | G | 8   | 4  | --        | --    |
|            | Ca(ICC2/PI489777)SNP_21939 | 3290 | G | A | 9   | 5  | --        | --    |
|            | Ca(ICC2/PI489777)SNP_21940 | 3343 | C | A | 7   | 4  | --        | --    |
| CakTC30917 | Ca(ICC2/PI489777)SNP_21941 | 894  | T | G | 3   | 4  | --        | --    |
| CakTC11607 | Ca(ICC2/PI489777)SNP_21942 | 245  | T | C | 15  | 14 | --        | CCAAT |
|            | Ca(ICC2/PI489777)SNP_21943 | 246  | T | C | 15  | 15 | --        | CCAAT |
|            | Ca(ICC2/PI489777)SNP_21944 | 376  | A | G | 22  | 16 | --        | CCAAT |
|            | Ca(ICC2/PI489777)SNP_21945 | 823  | C | T | 42  | 20 | --        | CCAAT |
|            | Ca(ICC2/PI489777)SNP_21946 | 1108 | A | G | 10  | 5  | --        | CCAAT |
| CakTC41072 | Ca(ICC2/PI489777)SNP_21947 | 524  | A | G | 6   | 3  | --        | --    |
| CakTC01717 | Ca(ICC2/PI489777)SNP_21948 | 530  | T | C | 17  | 19 | --        | --    |
|            | Ca(ICC2/PI489777)SNP_21949 | 1656 | C | T | 11  | 10 | --        | --    |
|            | Ca(ICC2/PI489777)SNP_21950 | 1850 | A | G | 8   | 7  | --        | --    |
| CakTC10094 | Ca(ICC2/PI489777)SNP_21951 | 137  | A | T | 3   | 3  | --        | --    |
| CakTC22246 | Ca(ICC2/PI489777)SNP_21952 | 382  | A | G | 19  | 18 | --        | --    |
| CakTC38034 | Ca(ICC2/PI489777)SNP_21953 | 745  | G | A | 51  | 50 | --        | --    |
|            | Ca(ICC2/PI489777)SNP_21954 | 1034 | G | A | 15  | 5  | --        | --    |
| CakTC40789 | Ca(ICC2/PI489777)SNP_21955 | 480  | T | C | 17  | 8  | Young_pod | --    |
|            | Ca(ICC2/PI489777)SNP_21956 | 1089 | A | T | 9   | 13 | Young_pod | --    |
|            | Ca(ICC2/PI489777)SNP_21957 | 1443 | G | A | 5   | 8  | Young_pod | --    |
| CakTC06070 | Ca(ICC2/PI489777)SNP_21958 | 1179 | A | G | 3   | 4  | --        | --    |
| CakTC28303 | Ca(ICC2/PI489777)SNP_21959 | 393  | C | A | 14  | 4  | --        | --    |
|            | Ca(ICC2/PI489777)SNP_21960 | 637  | C | G | 12  | 7  | --        | --    |
|            | Ca(ICC2/PI489777)SNP_21961 | 930  | A | G | 26  | 14 | --        | --    |
|            | Ca(ICC2/PI489777)SNP_21962 | 1014 | A | G | 23  | 13 | --        | --    |
|            | Ca(ICC2/PI489777)SNP_21963 | 1099 | C | G | 22  | 9  | --        | --    |
| CakTC25537 | Ca(ICC2/PI489777)SNP_21964 | 210  | A | G | 14  | 38 | Flower    | bud   |
| CakTC40333 | Ca(ICC2/PI489777)SNP_21965 | 318  | G | A | 4   | 40 | --        | --    |
|            | Ca(ICC2/PI489777)SNP_21966 | 660  | T | C | 6   | 32 | --        | --    |
| CakTC24303 | Ca(ICC2/PI489777)SNP_21967 | 48   | A | G | 4   | 4  | --        | --    |
|            | Ca(ICC2/PI489777)SNP_21968 | 67   | C | T | 7   | 6  | --        | --    |
|            | Ca(ICC2/PI489777)SNP_21969 | 90   | T | C | 11  | 8  | --        | --    |
|            | Ca(ICC2/PI489777)SNP_21970 | 126  | G | C | 11  | 8  | --        | --    |
|            | Ca(ICC2/PI489777)SNP_21971 | 230  | C | T | 11  | 10 | --        | --    |
|            | Ca(ICC2/PI489777)SNP_21972 | 579  | A | G | 8   | 7  | --        | --    |
| CakTC10968 | Ca(ICC2/PI489777)SNP_21973 | 756  | T | C | 3   | 10 | --        | --    |

|            |                            |      |   |   |    |    |       |      |
|------------|----------------------------|------|---|---|----|----|-------|------|
| CakTC23389 | Ca(ICC2/PI489777)SNP_21974 | 138  | A | G | 31 | 15 | --    | --   |
| CakTC38399 | Ca(ICC2/PI489777)SNP_21975 | 531  | A | G | 4  | 3  | --    | --   |
|            | Ca(ICC2/PI489777)SNP_21976 | 540  | C | T | 3  | 3  | --    | --   |
| CakTC31826 | Ca(ICC2/PI489777)SNP_21977 | 467  | T | G | 7  | 3  | --    | --   |
|            | Ca(ICC2/PI489777)SNP_21978 | 2081 | C | A | 8  | 6  | --    | --   |
| CakTC09659 | Ca(ICC2/PI489777)SNP_21979 | 3044 | C | G | 4  | 3  | --    | FARI |
| CakTC41722 | Ca(ICC2/PI489777)SNP_21980 | 364  | C | T | 5  | 12 | --    | bZIP |
|            | Ca(ICC2/PI489777)SNP_21981 | 514  | T | G | 3  | 6  | --    | bZIP |
| CakTC27273 | Ca(ICC2/PI489777)SNP_21982 | 1019 | T | C | 7  | 3  | --    | --   |
|            | Ca(ICC2/PI489777)SNP_21983 | 2066 | C | T | 5  | 11 | --    | --   |
|            | Ca(ICC2/PI489777)SNP_21984 | 2138 | G | C | 6  | 7  | --    | --   |
|            | Ca(ICC2/PI489777)SNP_21985 | 2156 | A | C | 6  | 7  | --    | --   |
|            | Ca(ICC2/PI489777)SNP_21986 | 2201 | C | A | 10 | 7  | --    | --   |
|            | Ca(ICC2/PI489777)SNP_21987 | 2438 | T | C | 10 | 12 | --    | --   |
|            | Ca(ICC2/PI489777)SNP_21988 | 2879 | C | T | 18 | 16 | --    | --   |
|            | Ca(ICC2/PI489777)SNP_21989 | 2960 | C | T | 9  | 11 | --    | --   |
|            | Ca(ICC2/PI489777)SNP_21990 | 3517 | C | A | 11 | 7  | --    | --   |
| CakTC23122 | Ca(ICC2/PI489777)SNP_21991 | 5836 | T | C | 44 | 9  | Shoot | --   |
|            | Ca(ICC2/PI489777)SNP_21992 | 6446 | T | C | 28 | 11 | Shoot | --   |
|            | Ca(ICC2/PI489777)SNP_21993 | 6507 | G | A | 23 | 9  | Shoot | --   |
| CakTC28076 | Ca(ICC2/PI489777)SNP_21994 | 2843 | A | G | 7  | 5  | --    | --   |
| CakTC37633 | Ca(ICC2/PI489777)SNP_21995 | 741  | C | T | 5  | 6  | --    | GRAS |
|            | Ca(ICC2/PI489777)SNP_21996 | 863  | A | G | 5  | 5  | --    | GRAS |
|            | Ca(ICC2/PI489777)SNP_21997 | 1641 | T | G | 5  | 4  | --    | GRAS |
| CakTC24762 | Ca(ICC2/PI489777)SNP_21998 | 266  | A | G | 26 | 10 | --    | --   |
|            | Ca(ICC2/PI489777)SNP_21999 | 308  | C | T | 29 | 11 | --    | --   |
|            | Ca(ICC2/PI489777)SNP_22000 | 568  | C | T | 19 | 9  | --    | --   |
|            | Ca(ICC2/PI489777)SNP_22001 | 865  | A | G | 26 | 15 | --    | --   |
|            | Ca(ICC2/PI489777)SNP_22002 | 1188 | A | G | 8  | 13 | --    | --   |
| CakTC25598 | Ca(ICC2/PI489777)SNP_22003 | 2522 | A | G | 14 | 3  | --    | --   |
|            | Ca(ICC2/PI489777)SNP_22004 | 3172 | C | A | 13 | 4  | --    | --   |
|            | Ca(ICC2/PI489777)SNP_22005 | 3255 | C | G | 17 | 7  | --    | --   |
|            | Ca(ICC2/PI489777)SNP_22006 | 4077 | T | C | 41 | 29 | --    | --   |
|            | Ca(ICC2/PI489777)SNP_22007 | 4369 | C | A | 46 | 21 | --    | --   |
|            | Ca(ICC2/PI489777)SNP_22008 | 4436 | C | A | 51 | 20 | --    | --   |
|            | Ca(ICC2/PI489777)SNP_22009 | 4558 | T | C | 71 | 22 | --    | --   |
|            | Ca(ICC2/PI489777)SNP_22010 | 4619 | C | A | 74 | 21 | --    | --   |
|            | Ca(ICC2/PI489777)SNP_22011 | 5326 | T | C | 67 | 22 | --    | --   |
|            | Ca(ICC2/PI489777)SNP_22012 | 6127 | A | T | 49 | 24 | --    | --   |
|            | Ca(ICC2/PI489777)SNP_22013 | 6871 | G | C | 74 | 43 | --    | --   |
|            | Ca(ICC2/PI489777)SNP_22014 | 7336 | C | A | 67 | 33 | --    | --   |
|            | Ca(ICC2/PI489777)SNP_22015 | 7642 | G | A | 45 | 39 | --    | --   |
|            | Ca(ICC2/PI489777)SNP_22016 | 8232 | C | T | 7  | 6  | --    | --   |
| CakTC37280 | Ca(ICC2/PI489777)SNP_22017 | 1245 | A | G | 15 | 5  | --    | --   |
|            | Ca(ICC2/PI489777)SNP_22018 | 1396 | T | C | 22 | 5  | --    | --   |
|            | Ca(ICC2/PI489777)SNP_22019 | 1554 | G | A | 20 | 4  | --    | --   |
|            | Ca(ICC2/PI489777)SNP_22020 | 1640 | A | G | 12 | 3  | --    | --   |
|            | Ca(ICC2/PI489777)SNP_22021 | 1661 | A | T | 12 | 3  | --    | --   |
| CakTC39520 | Ca(ICC2/PI489777)SNP_22022 | 176  | A | G | 4  | 3  | --    | --   |
|            | Ca(ICC2/PI489777)SNP_22023 | 218  | C | T | 3  | 3  | --    | --   |
|            | Ca(ICC2/PI489777)SNP_22024 | 314  | C | A | 5  | 7  | --    | --   |
|            | Ca(ICC2/PI489777)SNP_22025 | 651  | A | C | 16 | 9  | --    | --   |
|            | Ca(ICC2/PI489777)SNP_22026 | 769  | G | A | 15 | 8  | --    | --   |
|            | Ca(ICC2/PI489777)SNP_22027 | 852  | G | A | 11 | 8  | --    | --   |
|            | Ca(ICC2/PI489777)SNP_22028 | 939  | G | A | 13 | 9  | --    | --   |
|            | Ca(ICC2/PI489777)SNP_22029 | 971  | C | A | 15 | 11 | --    | --   |
|            | Ca(ICC2/PI489777)SNP_22030 | 1143 | G | A | 13 | 10 | --    | --   |
| CakTC35148 | Ca(ICC2/PI489777)SNP_22031 | 1262 | T | G | 8  | 3  | --    | --   |
|            | Ca(ICC2/PI489777)SNP_22032 | 1278 | G | C | 8  | 3  | --    | --   |
|            | Ca(ICC2/PI489777)SNP_22033 | 1506 | G | A | 7  | 5  | --    | --   |
|            | Ca(ICC2/PI489777)SNP_22034 | 2036 | A | G | 17 | 12 | --    | --   |
|            | Ca(ICC2/PI489777)SNP_22035 | 2887 | C | T | 18 | 10 | --    | --   |
| CakTC37094 | Ca(ICC2/PI489777)SNP_22036 | 1301 | G | C | 8  | 5  | --    | --   |
|            | Ca(ICC2/PI489777)SNP_22037 | 1307 | T | C | 8  | 5  | --    | --   |
|            | Ca(ICC2/PI489777)SNP_22038 | 1322 | T | C | 8  | 5  | --    | --   |
|            | Ca(ICC2/PI489777)SNP_22039 | 1371 | A | C | 9  | 6  | --    | --   |
| CakTC37862 | Ca(ICC2/PI489777)SNP_22040 | 158  | A | G | 7  | 3  | --    | --   |
| CakTC41744 | Ca(ICC2/PI489777)SNP_22041 | 2017 | A | C | 26 | 36 | --    | --   |
|            | Ca(ICC2/PI489777)SNP_22042 | 2028 | T | C | 26 | 34 | --    | --   |
|            | Ca(ICC2/PI489777)SNP_22043 | 2041 | T | C | 28 | 33 | --    | --   |
|            | Ca(ICC2/PI489777)SNP_22044 | 2086 | A | G | 29 | 27 | --    | --   |
|            | Ca(ICC2/PI489777)SNP_22045 | 2187 | G | C | 24 | 23 | --    | --   |
|            | Ca(ICC2/PI489777)SNP_22046 | 2199 | T | C | 30 | 22 | --    | --   |
| CakTC39554 | Ca(ICC2/PI489777)SNP_22047 | 211  | A | G | 24 | 4  | --    | --   |

|            |                            |      |   |   |     |    |           |         |
|------------|----------------------------|------|---|---|-----|----|-----------|---------|
|            | Ca(ICC2/PI489777)SNP_22048 | 237  | C | T | 24  | 4  | --        | --      |
|            | Ca(ICC2/PI489777)SNP_22049 | 272  | A | G | 23  | 4  | --        | --      |
|            | Ca(ICC2/PI489777)SNP_22050 | 343  | A | C | 22  | 4  | --        | --      |
|            | Ca(ICC2/PI489777)SNP_22051 | 401  | G | C | 20  | 4  | --        | --      |
| CakTC29128 | Ca(ICC2/PI489777)SNP_22052 | 177  | G | C | 25  | 61 | --        | --      |
|            | Ca(ICC2/PI489777)SNP_22053 | 528  | C | T | 38  | 63 | --        | --      |
|            | Ca(ICC2/PI489777)SNP_22054 | 610  | T | C | 62  | 66 | --        | --      |
|            | Ca(ICC2/PI489777)SNP_22055 | 625  | C | G | 60  | 65 | --        | --      |
| CakTC38489 | Ca(ICC2/PI489777)SNP_22056 | 1416 | C | G | 5   | 6  | --        | --      |
|            | Ca(ICC2/PI489777)SNP_22057 | 1623 | C | T | 7   | 4  | --        | --      |
| CakTC30093 | Ca(ICC2/PI489777)SNP_22058 | 1124 | A | C | 9   | 8  | Root      | --      |
|            | Ca(ICC2/PI489777)SNP_22059 | 1141 | G | A | 9   | 9  | Root      | --      |
|            | Ca(ICC2/PI489777)SNP_22060 | 1264 | G | A | 10  | 4  | Root      | --      |
| CakTC41403 | Ca(ICC2/PI489777)SNP_22061 | 322  | T | G | 4   | 8  | --        | CCAAT   |
|            | Ca(ICC2/PI489777)SNP_22062 | 380  | G | C | 5   | 10 | --        | CCAAT   |
|            | Ca(ICC2/PI489777)SNP_22063 | 658  | A | G | 12  | 10 | --        | CCAAT   |
|            | Ca(ICC2/PI489777)SNP_22064 | 697  | C | A | 12  | 8  | --        | CCAAT   |
|            | Ca(ICC2/PI489777)SNP_22065 | 700  | A | G | 12  | 8  | --        | CCAAT   |
| CakTC23321 | Ca(ICC2/PI489777)SNP_22066 | 3520 | A | T | 124 | 75 | --        | --      |
|            | Ca(ICC2/PI489777)SNP_22067 | 3523 | T | A | 123 | 75 | --        | --      |
|            | Ca(ICC2/PI489777)SNP_22068 | 4321 | A | T | 76  | 32 | --        | --      |
| CakTC25127 | Ca(ICC2/PI489777)SNP_22069 | 898  | G | A | 39  | 3  | --        | --      |
| CakTC42397 | Ca(ICC2/PI489777)SNP_22070 | 347  | C | T | 10  | 4  | --        | --      |
|            | Ca(ICC2/PI489777)SNP_22071 | 1589 | G | A | 5   | 10 | --        | --      |
| CakTC29857 | Ca(ICC2/PI489777)SNP_22072 | 2661 | T | C | 3   | 6  | Flower    | bud     |
| CakTC10028 | Ca(ICC2/PI489777)SNP_22073 | 45   | A | T | 3   | 4  | --        | --      |
|            | Ca(ICC2/PI489777)SNP_22074 | 172  | G | C | 5   | 4  | --        | --      |
| CakTC23847 | Ca(ICC2/PI489777)SNP_22075 | 82   | C | G | 4   | 3  | --        | --      |
|            | Ca(ICC2/PI489777)SNP_22076 | 571  | C | T | 32  | 9  | --        | --      |
|            | Ca(ICC2/PI489777)SNP_22077 | 1820 | C | G | 27  | 5  | --        | --      |
|            | Ca(ICC2/PI489777)SNP_22078 | 2016 | T | C | 15  | 9  | --        | --      |
| CakTC33963 | Ca(ICC2/PI489777)SNP_22079 | 418  | T | G | 22  | 9  | --        | --      |
|            | Ca(ICC2/PI489777)SNP_22080 | 483  | C | A | 22  | 9  | --        | --      |
|            | Ca(ICC2/PI489777)SNP_22081 | 493  | T | C | 22  | 10 | --        | --      |
|            | Ca(ICC2/PI489777)SNP_22082 | 500  | G | T | 22  | 10 | --        | --      |
|            | Ca(ICC2/PI489777)SNP_22083 | 543  | G | C | 19  | 9  | --        | --      |
| CakTC35496 | Ca(ICC2/PI489777)SNP_22084 | 267  | T | A | 8   | 5  | --        | --      |
|            | Ca(ICC2/PI489777)SNP_22085 | 568  | G | A | 22  | 13 | --        | --      |
|            | Ca(ICC2/PI489777)SNP_22086 | 1059 | A | T | 23  | 28 | --        | --      |
|            | Ca(ICC2/PI489777)SNP_22087 | 1359 | T | G | 15  | 17 | --        | --      |
|            | Ca(ICC2/PI489777)SNP_22088 | 1818 | G | A | 11  | 16 | --        | --      |
|            | Ca(ICC2/PI489777)SNP_22089 | 2219 | A | T | 18  | 17 | --        | --      |
|            | Ca(ICC2/PI489777)SNP_22090 | 2220 | T | G | 18  | 17 | --        | --      |
|            | Ca(ICC2/PI489777)SNP_22091 | 2883 | T | C | 7   | 5  | --        | --      |
|            | Ca(ICC2/PI489777)SNP_22092 | 2978 | C | G | 10  | 7  | --        | --      |
|            | Ca(ICC2/PI489777)SNP_22093 | 3713 | G | C | 8   | 13 | --        | --      |
| CakTC35618 | Ca(ICC2/PI489777)SNP_22094 | 1341 | G | A | 3   | 3  | --        | Jumonji |
|            | Ca(ICC2/PI489777)SNP_22095 | 1426 | T | C | 5   | 5  | --        | Jumonji |
|            | Ca(ICC2/PI489777)SNP_22096 | 2101 | T | C | 5   | 4  | --        | Jumonji |
|            | Ca(ICC2/PI489777)SNP_22097 | 3014 | T | C | 4   | 5  | --        | Jumonji |
| CakTC29788 | Ca(ICC2/PI489777)SNP_22098 | 241  | T | C | 4   | 3  | Young_pod | --      |
| CakTC28337 | Ca(ICC2/PI489777)SNP_22099 | 1644 | A | G | 7   | 4  | Root      | --      |
|            | Ca(ICC2/PI489777)SNP_22100 | 2698 | C | T | 15  | 5  | Root      | --      |
| CakTC37760 | Ca(ICC2/PI489777)SNP_22101 | 550  | G | A | 3   | 4  | --        | --      |
|            | Ca(ICC2/PI489777)SNP_22102 | 561  | G | A | 4   | 4  | --        | --      |
| CakTC41971 | Ca(ICC2/PI489777)SNP_22103 | 350  | G | C | 24  | 6  | --        | --      |
|            | Ca(ICC2/PI489777)SNP_22104 | 447  | T | C | 27  | 8  | --        | --      |
|            | Ca(ICC2/PI489777)SNP_22105 | 653  | G | T | 17  | 14 | --        | --      |
|            | Ca(ICC2/PI489777)SNP_22106 | 692  | C | G | 13  | 12 | --        | --      |
|            | Ca(ICC2/PI489777)SNP_22107 | 731  | C | T | 12  | 11 | --        | --      |
|            | Ca(ICC2/PI489777)SNP_22108 | 754  | C | T | 11  | 10 | --        | --      |
| CakTC24899 | Ca(ICC2/PI489777)SNP_22109 | 506  | G | T | 3   | 3  | --        | --      |
|            | Ca(ICC2/PI489777)SNP_22110 | 731  | T | C | 6   | 4  | --        | --      |
|            | Ca(ICC2/PI489777)SNP_22111 | 1291 | C | T | 51  | 10 | --        | --      |
| CakTC33243 | Ca(ICC2/PI489777)SNP_22112 | 475  | G | T | 3   | 8  | --        | --      |
|            | Ca(ICC2/PI489777)SNP_22113 | 491  | A | C | 4   | 9  | --        | --      |
|            | Ca(ICC2/PI489777)SNP_22114 | 502  | A | G | 4   | 9  | --        | --      |
|            | Ca(ICC2/PI489777)SNP_22115 | 505  | T | C | 4   | 9  | --        | --      |
|            | Ca(ICC2/PI489777)SNP_22116 | 631  | G | A | 6   | 9  | --        | --      |
|            | Ca(ICC2/PI489777)SNP_22117 | 691  | C | T | 7   | 12 | --        | --      |
| CakTC35659 | Ca(ICC2/PI489777)SNP_22118 | 80   | C | G | 12  | 7  | --        | --      |
|            | Ca(ICC2/PI489777)SNP_22119 | 1111 | G | A | 15  | 11 | --        | --      |
|            | Ca(ICC2/PI489777)SNP_22120 | 1113 | A | C | 17  | 10 | --        | --      |
|            | Ca(ICC2/PI489777)SNP_22121 | 2231 | T | C | 19  | 11 | --        | --      |

|            |                             |      |   |   |     |     |    |     |
|------------|-----------------------------|------|---|---|-----|-----|----|-----|
|            | Ca(ICCV2/PI489777)SNP_22122 | 2273 | A | G | 17  | 9   | -- | --  |
| CakTC38569 | Ca(ICCV2/PI489777)SNP_22123 | 319  | A | G | 10  | 7   | -- | --  |
|            | Ca(ICCV2/PI489777)SNP_22124 | 613  | C | T | 18  | 9   | -- | --  |
|            | Ca(ICCV2/PI489777)SNP_22125 | 634  | T | C | 18  | 8   | -- | --  |
| CakTC30565 | Ca(ICCV2/PI489777)SNP_22126 | 1775 | T | C | 15  | 11  | -- | --  |
|            | Ca(ICCV2/PI489777)SNP_22127 | 1880 | A | T | 13  | 6   | -- | --  |
|            | Ca(ICCV2/PI489777)SNP_22128 | 1958 | C | G | 4   | 5   | -- | --  |
| CakTC09941 | Ca(ICCV2/PI489777)SNP_22129 | 527  | G | A | 3   | 3   | -- | --  |
| CakTC23920 | Ca(ICCV2/PI489777)SNP_22130 | 2606 | T | A | 17  | 12  | -- | --  |
|            | Ca(ICCV2/PI489777)SNP_22131 | 2775 | G | A | 4   | 6   | -- | --  |
| CakTC41638 | Ca(ICCV2/PI489777)SNP_22132 | 187  | T | C | 3   | 10  | -- | MYB |
| CakTC38334 | Ca(ICCV2/PI489777)SNP_22133 | 109  | A | C | 30  | 9   | -- | --  |
|            | Ca(ICCV2/PI489777)SNP_22134 | 763  | A | G | 33  | 4   | -- | --  |
| CakTC40136 | Ca(ICCV2/PI489777)SNP_22135 | 351  | T | C | 12  | 14  | -- | --  |
| CakTC27941 | Ca(ICCV2/PI489777)SNP_22136 | 228  | T | C | 15  | 17  | -- | --  |
|            | Ca(ICCV2/PI489777)SNP_22137 | 256  | G | C | 20  | 17  | -- | --  |
|            | Ca(ICCV2/PI489777)SNP_22138 | 764  | A | G | 93  | 23  | -- | --  |
|            | Ca(ICCV2/PI489777)SNP_22139 | 2082 | T | A | 16  | 57  | -- | --  |
|            | Ca(ICCV2/PI489777)SNP_22140 | 2163 | G | C | 11  | 5   | -- | --  |
| CakTC34195 | Ca(ICCV2/PI489777)SNP_22141 | 466  | T | C | 8   | 4   | -- | --  |
| CakTC33458 | Ca(ICCV2/PI489777)SNP_22142 | 822  | G | A | 37  | 13  | -- | --  |
| CakTC38752 | Ca(ICCV2/PI489777)SNP_22143 | 173  | G | A | 6   | 3   | -- | --  |
|            | Ca(ICCV2/PI489777)SNP_22144 | 194  | T | C | 6   | 6   | -- | --  |
|            | Ca(ICCV2/PI489777)SNP_22145 | 197  | A | T | 6   | 6   | -- | --  |
|            | Ca(ICCV2/PI489777)SNP_22146 | 231  | T | G | 9   | 6   | -- | --  |
|            | Ca(ICCV2/PI489777)SNP_22147 | 750  | G | A | 24  | 7   | -- | --  |
|            | Ca(ICCV2/PI489777)SNP_22148 | 1117 | A | G | 29  | 4   | -- | --  |
| CakTC40080 | Ca(ICCV2/PI489777)SNP_22149 | 171  | T | G | 9   | 9   | -- | --  |
| CakTC28562 | Ca(ICCV2/PI489777)SNP_22150 | 121  | C | T | 8   | 6   | -- | --  |
| CakTC42996 | Ca(ICCV2/PI489777)SNP_22151 | 218  | A | G | 9   | 11  | -- | --  |
|            | Ca(ICCV2/PI489777)SNP_22152 | 652  | G | A | 71  | 30  | -- | --  |
|            | Ca(ICCV2/PI489777)SNP_22153 | 768  | C | A | 36  | 15  | -- | --  |
| CakTC26480 | Ca(ICCV2/PI489777)SNP_22154 | 284  | G | C | 164 | 16  | -- | --  |
| CakTC26742 | Ca(ICCV2/PI489777)SNP_22155 | 1255 | G | A | 25  | 5   | -- | --  |
|            | Ca(ICCV2/PI489777)SNP_22156 | 1342 | A | G | 25  | 6   | -- | --  |
|            | Ca(ICCV2/PI489777)SNP_22157 | 1351 | A | G | 26  | 6   | -- | --  |
|            | Ca(ICCV2/PI489777)SNP_22158 | 1399 | T | G | 28  | 8   | -- | --  |
|            | Ca(ICCV2/PI489777)SNP_22159 | 1468 | A | G | 18  | 8   | -- | --  |
| CakTC25438 | Ca(ICCV2/PI489777)SNP_22160 | 3349 | A | G | 5   | 4   | -- | --  |
|            | Ca(ICCV2/PI489777)SNP_22161 | 3563 | C | G | 8   | 5   | -- | --  |
|            | Ca(ICCV2/PI489777)SNP_22162 | 4431 | C | T | 8   | 5   | -- | --  |
| CakTC31723 | Ca(ICCV2/PI489777)SNP_22163 | 426  | T | G | 5   | 3   | -- | --  |
|            | Ca(ICCV2/PI489777)SNP_22164 | 771  | C | A | 7   | 3   | -- | --  |
|            | Ca(ICCV2/PI489777)SNP_22165 | 856  | G | C | 6   | 4   | -- | --  |
|            | Ca(ICCV2/PI489777)SNP_22166 | 874  | A | G | 7   | 4   | -- | --  |
|            | Ca(ICCV2/PI489777)SNP_22167 | 887  | G | A | 7   | 4   | -- | --  |
|            | Ca(ICCV2/PI489777)SNP_22168 | 1187 | G | A | 11  | 4   | -- | --  |
|            | Ca(ICCV2/PI489777)SNP_22169 | 1246 | C | T | 13  | 4   | -- | --  |
|            | Ca(ICCV2/PI489777)SNP_22170 | 1259 | T | G | 12  | 3   | -- | --  |
| CakTC23778 | Ca(ICCV2/PI489777)SNP_22171 | 995  | C | T | 22  | 6   | -- | --  |
|            | Ca(ICCV2/PI489777)SNP_22172 | 1079 | T | C | 13  | 3   | -- | --  |
| CakTC26669 | Ca(ICCV2/PI489777)SNP_22173 | 2607 | G | A | 44  | 25  | -- | --  |
|            | Ca(ICCV2/PI489777)SNP_22174 | 2702 | C | T | 23  | 26  | -- | --  |
|            | Ca(ICCV2/PI489777)SNP_22175 | 3050 | T | C | 5   | 6   | -- | --  |
| CakTC07858 | Ca(ICCV2/PI489777)SNP_22176 | 590  | A | G | 45  | 29  | -- | --  |
|            | Ca(ICCV2/PI489777)SNP_22177 | 841  | C | T | 62  | 25  | -- | --  |
|            | Ca(ICCV2/PI489777)SNP_22178 | 896  | G | T | 67  | 30  | -- | --  |
|            | Ca(ICCV2/PI489777)SNP_22179 | 1868 | G | T | 31  | 22  | -- | --  |
|            | Ca(ICCV2/PI489777)SNP_22180 | 2033 | G | C | 48  | 23  | -- | --  |
|            | Ca(ICCV2/PI489777)SNP_22181 | 2667 | C | G | 21  | 19  | -- | --  |
|            | Ca(ICCV2/PI489777)SNP_22182 | 2685 | C | T | 18  | 18  | -- | --  |
|            | Ca(ICCV2/PI489777)SNP_22183 | 2686 | G | C | 17  | 18  | -- | --  |
|            | Ca(ICCV2/PI489777)SNP_22184 | 2802 | G | T | 13  | 13  | -- | --  |
|            | Ca(ICCV2/PI489777)SNP_22185 | 2906 | G | T | 12  | 8   | -- | --  |
| CakTC23249 | Ca(ICCV2/PI489777)SNP_22186 | 1884 | T | G | 433 | 111 | -- | --  |
|            | Ca(ICCV2/PI489777)SNP_22187 | 2467 | A | C | 259 | 112 | -- | --  |
|            | Ca(ICCV2/PI489777)SNP_22188 | 3271 | A | G | 365 | 121 | -- | --  |
| CakTC29067 | Ca(ICCV2/PI489777)SNP_22189 | 697  | G | C | 30  | 6   | -- | --  |
|            | Ca(ICCV2/PI489777)SNP_22190 | 1379 | G | A | 13  | 6   | -- | --  |
|            | Ca(ICCV2/PI489777)SNP_22191 | 1502 | G | C | 13  | 7   | -- | --  |
|            | Ca(ICCV2/PI489777)SNP_22192 | 1537 | C | T | 11  | 7   | -- | --  |
| CakTC26202 | Ca(ICCV2/PI489777)SNP_22193 | 109  | C | T | 9   | 7   | -- | --  |
|            | Ca(ICCV2/PI489777)SNP_22194 | 306  | C | G | 32  | 24  | -- | --  |
|            | Ca(ICCV2/PI489777)SNP_22195 | 465  | G | A | 30  | 17  | -- | --  |

|            |                             |      |   |   |    |    |    |      |
|------------|-----------------------------|------|---|---|----|----|----|------|
|            | Ca(ICCV2/PI489777)SNP_22196 | 507  | G | A | 25 | 14 | -- | --   |
| CakTC40638 | Ca(ICCV2/PI489777)SNP_22197 | 676  | A | C | 5  | 10 | -- | --   |
|            | Ca(ICCV2/PI489777)SNP_22198 | 734  | T | C | 5  | 10 | -- | --   |
|            | Ca(ICCV2/PI489777)SNP_22199 | 789  | T | A | 7  | 10 | -- | --   |
|            | Ca(ICCV2/PI489777)SNP_22200 | 914  | C | T | 7  | 8  | -- | --   |
| CakTC26283 | Ca(ICCV2/PI489777)SNP_22201 | 216  | G | A | 41 | 13 | -- | --   |
|            | Ca(ICCV2/PI489777)SNP_22202 | 1196 | T | C | 11 | 4  | -- | --   |
| CakTC28715 | Ca(ICCV2/PI489777)SNP_22203 | 390  | T | C | 11 | 5  | -- | --   |
| CakTC25807 | Ca(ICCV2/PI489777)SNP_22204 | 953  | C | T | 9  | 4  | -- | --   |
| CakTC27614 | Ca(ICCV2/PI489777)SNP_22205 | 170  | T | A | 4  | 5  | -- | --   |
| CakTC10138 | Ca(ICCV2/PI489777)SNP_22206 | 252  | C | T | 10 | 5  | -- | --   |
| CakTC13725 | Ca(ICCV2/PI489777)SNP_22207 | 32   | C | G | 3  | 3  | -- | --   |
|            | Ca(ICCV2/PI489777)SNP_22208 | 51   | A | G | 3  | 4  | -- | --   |
|            | Ca(ICCV2/PI489777)SNP_22209 | 63   | T | C | 3  | 4  | -- | --   |
|            | Ca(ICCV2/PI489777)SNP_22210 | 64   | T | C | 3  | 6  | -- | --   |
|            | Ca(ICCV2/PI489777)SNP_22211 | 78   | G | A | 3  | 7  | -- | --   |
|            | Ca(ICCV2/PI489777)SNP_22212 | 97   | G | A | 3  | 6  | -- | --   |
|            | Ca(ICCV2/PI489777)SNP_22213 | 99   | A | G | 3  | 7  | -- | --   |
|            | Ca(ICCV2/PI489777)SNP_22214 | 132  | G | A | 3  | 7  | -- | --   |
|            | Ca(ICCV2/PI489777)SNP_22215 | 159  | T | G | 3  | 8  | -- | --   |
|            | Ca(ICCV2/PI489777)SNP_22216 | 188  | G | A | 3  | 8  | -- | --   |
|            | Ca(ICCV2/PI489777)SNP_22217 | 219  | T | C | 3  | 7  | -- | --   |
|            | Ca(ICCV2/PI489777)SNP_22218 | 231  | G | A | 3  | 8  | -- | --   |
|            | Ca(ICCV2/PI489777)SNP_22219 | 232  | G | T | 3  | 8  | -- | --   |
| CakTC38065 | Ca(ICCV2/PI489777)SNP_22220 | 275  | G | T | 8  | 4  | -- | --   |
|            | Ca(ICCV2/PI489777)SNP_22221 | 423  | A | G | 12 | 5  | -- | --   |
|            | Ca(ICCV2/PI489777)SNP_22222 | 474  | A | C | 24 | 9  | -- | --   |
|            | Ca(ICCV2/PI489777)SNP_22223 | 642  | C | T | 37 | 15 | -- | --   |
|            | Ca(ICCV2/PI489777)SNP_22224 | 688  | C | T | 33 | 20 | -- | --   |
|            | Ca(ICCV2/PI489777)SNP_22225 | 1173 | T | G | 18 | 14 | -- | --   |
|            | Ca(ICCV2/PI489777)SNP_22226 | 1221 | A | G | 16 | 11 | -- | --   |
|            | Ca(ICCV2/PI489777)SNP_22227 | 1257 | G | C | 16 | 14 | -- | --   |
|            | Ca(ICCV2/PI489777)SNP_22228 | 1506 | T | C | 12 | 11 | -- | --   |
|            | Ca(ICCV2/PI489777)SNP_22229 | 1537 | T | G | 12 | 9  | -- | --   |
| CakTC31846 | Ca(ICCV2/PI489777)SNP_22230 | 939  | C | G | 11 | 4  | -- | --   |
| CakTC39049 | Ca(ICCV2/PI489777)SNP_22231 | 750  | G | A | 6  | 3  | -- | --   |
| CakTC33719 | Ca(ICCV2/PI489777)SNP_22232 | 95   | G | A | 16 | 6  | -- | --   |
|            | Ca(ICCV2/PI489777)SNP_22233 | 155  | G | T | 17 | 7  | -- | --   |
|            | Ca(ICCV2/PI489777)SNP_22234 | 176  | T | C | 17 | 10 | -- | --   |
| CakTC27151 | Ca(ICCV2/PI489777)SNP_22235 | 89   | A | G | 31 | 7  | -- | --   |
| CakTC26067 | Ca(ICCV2/PI489777)SNP_22236 | 380  | A | C | 3  | 3  | -- | --   |
| CakTC22736 | Ca(ICCV2/PI489777)SNP_22237 | 399  | C | T | 15 | 10 | -- | --   |
|            | Ca(ICCV2/PI489777)SNP_22238 | 445  | T | G | 10 | 8  | -- | --   |
|            | Ca(ICCV2/PI489777)SNP_22239 | 460  | A | C | 10 | 9  | -- | --   |
|            | Ca(ICCV2/PI489777)SNP_22240 | 572  | C | T | 22 | 19 | -- | --   |
|            | Ca(ICCV2/PI489777)SNP_22241 | 797  | T | C | 33 | 5  | -- | --   |
| CakTC28707 | Ca(ICCV2/PI489777)SNP_22242 | 541  | G | A | 61 | 50 | -- | --   |
|            | Ca(ICCV2/PI489777)SNP_22243 | 550  | G | C | 62 | 49 | -- | --   |
|            | Ca(ICCV2/PI489777)SNP_22244 | 646  | T | C | 42 | 46 | -- | --   |
| CakTC26405 | Ca(ICCV2/PI489777)SNP_22245 | 841  | G | C | 29 | 24 | -- | --   |
|            | Ca(ICCV2/PI489777)SNP_22246 | 1453 | T | C | 27 | 20 | -- | --   |
| CakTC39180 | Ca(ICCV2/PI489777)SNP_22247 | 480  | G | A | 45 | 13 | -- | Tify |
|            | Ca(ICCV2/PI489777)SNP_22248 | 533  | G | A | 55 | 18 | -- | Tify |
|            | Ca(ICCV2/PI489777)SNP_22249 | 1071 | A | G | 45 | 18 | -- | Tify |
|            | Ca(ICCV2/PI489777)SNP_22250 | 1116 | C | T | 47 | 18 | -- | Tify |
|            | Ca(ICCV2/PI489777)SNP_22251 | 1388 | T | C | 27 | 8  | -- | Tify |
| CakTC43064 | Ca(ICCV2/PI489777)SNP_22252 | 315  | C | G | 28 | 15 | -- | --   |
|            | Ca(ICCV2/PI489777)SNP_22253 | 694  | G | C | 33 | 20 | -- | --   |
|            | Ca(ICCV2/PI489777)SNP_22254 | 709  | T | G | 31 | 20 | -- | --   |
| CakTC38532 | Ca(ICCV2/PI489777)SNP_22255 | 76   | T | C | 3  | 3  | -- | --   |
|            | Ca(ICCV2/PI489777)SNP_22256 | 102  | C | T | 4  | 3  | -- | --   |
|            | Ca(ICCV2/PI489777)SNP_22257 | 169  | C | T | 5  | 3  | -- | --   |
|            | Ca(ICCV2/PI489777)SNP_22258 | 170  | C | T | 5  | 3  | -- | --   |
| CakTC09742 | Ca(ICCV2/PI489777)SNP_22259 | 1641 | A | G | 6  | 4  | -- | --   |
| CakTC27727 | Ca(ICCV2/PI489777)SNP_22260 | 272  | T | A | 6  | 9  | -- | --   |
| CakTC24062 | Ca(ICCV2/PI489777)SNP_22261 | 369  | T | C | 8  | 3  | -- | --   |
| CakTC39424 | Ca(ICCV2/PI489777)SNP_22262 | 132  | T | A | 4  | 4  | -- | --   |
|            | Ca(ICCV2/PI489777)SNP_22263 | 134  | C | A | 4  | 4  | -- | --   |
| CakTC26030 | Ca(ICCV2/PI489777)SNP_22264 | 229  | G | A | 5  | 4  | -- | --   |
|            | Ca(ICCV2/PI489777)SNP_22265 | 1149 | T | C | 34 | 9  | -- | --   |
| CakTC42145 | Ca(ICCV2/PI489777)SNP_22266 | 329  | G | A | 3  | 5  | -- | --   |
|            | Ca(ICCV2/PI489777)SNP_22267 | 470  | T | C | 5  | 5  | -- | --   |
| CakTC07911 | Ca(ICCV2/PI489777)SNP_22268 | 337  | C | T | 3  | 3  | -- | --   |
| CakTC37680 | Ca(ICCV2/PI489777)SNP_22269 | 298  | T | C | 11 | 9  | -- | --   |

|            |                            |       |   |   |     |    |    |     |
|------------|----------------------------|-------|---|---|-----|----|----|-----|
|            | Ca(ICC2/PI489777)SNP_22270 | 568   | C | T | 16  | 16 | -- | --  |
|            | Ca(ICC2/PI489777)SNP_22271 | 923   | G | A | 14  | 12 | -- | --  |
| CakTC29087 | Ca(ICC2/PI489777)SNP_22272 | 389   | C | T | 6   | 3  | -- | --  |
|            | Ca(ICC2/PI489777)SNP_22273 | 469   | C | G | 4   | 3  | -- | --  |
|            | Ca(ICC2/PI489777)SNP_22274 | 551   | A | C | 7   | 3  | -- | --  |
|            | Ca(ICC2/PI489777)SNP_22275 | 1125  | C | G | 4   | 3  | -- | --  |
|            | Ca(ICC2/PI489777)SNP_22276 | 1664  | C | G | 3   | 6  | -- | --  |
|            | Ca(ICC2/PI489777)SNP_22277 | 1697  | T | G | 4   | 4  | -- | --  |
|            | Ca(ICC2/PI489777)SNP_22278 | 1712  | C | A | 4   | 4  | -- | --  |
|            | Ca(ICC2/PI489777)SNP_22279 | 1769  | T | A | 4   | 4  | -- | --  |
| CakTC37878 | Ca(ICC2/PI489777)SNP_22280 | 472   | C | G | 5   | 4  | -- | --  |
| CakTC35513 | Ca(ICC2/PI489777)SNP_22281 | 609   | G | A | 3   | 3  | -- | --  |
| CakTC42759 | Ca(ICC2/PI489777)SNP_22282 | 54    | C | A | 5   | 3  | -- | --  |
|            | Ca(ICC2/PI489777)SNP_22283 | 144   | A | G | 6   | 3  | -- | --  |
| CakTC26567 | Ca(ICC2/PI489777)SNP_22284 | 395   | C | T | 15  | 7  | -- | --  |
|            | Ca(ICC2/PI489777)SNP_22285 | 869   | G | T | 13  | 4  | -- | --  |
|            | Ca(ICC2/PI489777)SNP_22286 | 909   | A | G | 9   | 4  | -- | --  |
|            | Ca(ICC2/PI489777)SNP_22287 | 944   | A | C | 5   | 6  | -- | --  |
|            | Ca(ICC2/PI489777)SNP_22288 | 1049  | A | C | 9   | 5  | -- | --  |
|            | Ca(ICC2/PI489777)SNP_22289 | 1256  | T | C | 5   | 3  | -- | --  |
| CakTC36109 | Ca(ICC2/PI489777)SNP_22290 | 501   | A | G | 5   | 3  | -- | --  |
|            | Ca(ICC2/PI489777)SNP_22291 | 949   | A | G | 9   | 5  | -- | --  |
|            | Ca(ICC2/PI489777)SNP_22292 | 2654  | C | G | 4   | 7  | -- | --  |
|            | Ca(ICC2/PI489777)SNP_22293 | 3102  | A | C | 14  | 7  | -- | --  |
|            | Ca(ICC2/PI489777)SNP_22294 | 5139  | T | A | 6   | 5  | -- | --  |
| CakTC29715 | Ca(ICC2/PI489777)SNP_22295 | 362   | G | A | 17  | 8  | -- | --  |
|            | Ca(ICC2/PI489777)SNP_22296 | 828   | G | A | 13  | 7  | -- | --  |
| CakTC33445 | Ca(ICC2/PI489777)SNP_22297 | 418   | C | T | 44  | 42 | -- | --  |
| CakTC26103 | Ca(ICC2/PI489777)SNP_22298 | 179   | A | C | 15  | 9  | -- | --  |
| CakTC26400 | Ca(ICC2/PI489777)SNP_22299 | 350   | T | C | 13  | 7  | -- | --  |
| CakTC43096 | Ca(ICC2/PI489777)SNP_22300 | 517   | A | C | 13  | 8  | -- | --  |
|            | Ca(ICC2/PI489777)SNP_22301 | 707   | C | T | 6   | 9  | -- | --  |
|            | Ca(ICC2/PI489777)SNP_22302 | 1031  | C | T | 9   | 5  | -- | --  |
|            | Ca(ICC2/PI489777)SNP_22303 | 1137  | A | G | 8   | 7  | -- | --  |
| CakTC40037 | Ca(ICC2/PI489777)SNP_22304 | 255   | G | C | 3   | 3  | -- | --  |
|            | Ca(ICC2/PI489777)SNP_22305 | 578   | C | T | 7   | 4  | -- | --  |
|            | Ca(ICC2/PI489777)SNP_22306 | 579   | A | G | 7   | 4  | -- | --  |
|            | Ca(ICC2/PI489777)SNP_22307 | 1132  | A | G | 7   | 4  | -- | --  |
| CakTC39170 | Ca(ICC2/PI489777)SNP_22308 | 1229  | C | T | 6   | 6  | -- | --  |
| CakTC34031 | Ca(ICC2/PI489777)SNP_22309 | 1519  | G | A | 7   | 28 | -- | --  |
|            | Ca(ICC2/PI489777)SNP_22310 | 1894  | G | T | 8   | 10 | -- | --  |
|            | Ca(ICC2/PI489777)SNP_22311 | 2791  | T | C | 20  | 12 | -- | --  |
|            | Ca(ICC2/PI489777)SNP_22312 | 3895  | T | C | 17  | 13 | -- | --  |
|            | Ca(ICC2/PI489777)SNP_22313 | 4903  | C | T | 16  | 21 | -- | --  |
|            | Ca(ICC2/PI489777)SNP_22314 | 5369  | G | C | 23  | 14 | -- | --  |
|            | Ca(ICC2/PI489777)SNP_22315 | 6217  | C | T | 31  | 6  | -- | --  |
|            | Ca(ICC2/PI489777)SNP_22316 | 7123  | T | G | 17  | 11 | -- | --  |
|            | Ca(ICC2/PI489777)SNP_22317 | 7585  | T | C | 14  | 9  | -- | --  |
|            | Ca(ICC2/PI489777)SNP_22318 | 7855  | T | C | 19  | 19 | -- | --  |
|            | Ca(ICC2/PI489777)SNP_22319 | 10711 | G | A | 29  | 9  | -- | --  |
| CakTC10390 | Ca(ICC2/PI489777)SNP_22320 | 991   | A | T | 214 | 48 | -- | C3H |
|            | Ca(ICC2/PI489777)SNP_22321 | 1132  | C | A | 176 | 58 | -- | C3H |
|            | Ca(ICC2/PI489777)SNP_22322 | 1138  | T | C | 181 | 56 | -- | C3H |
|            | Ca(ICC2/PI489777)SNP_22323 | 1645  | C | T | 118 | 37 | -- | C3H |
|            | Ca(ICC2/PI489777)SNP_22324 | 1744  | A | G | 117 | 34 | -- | C3H |
| CakTC30239 | Ca(ICC2/PI489777)SNP_22325 | 676   | C | T | 26  | 3  | -- | --  |
|            | Ca(ICC2/PI489777)SNP_22326 | 738   | C | G | 31  | 3  | -- | --  |
| CakTC37678 | Ca(ICC2/PI489777)SNP_22327 | 361   | C | G | 14  | 5  | -- | --  |
|            | Ca(ICC2/PI489777)SNP_22328 | 452   | A | G | 38  | 3  | -- | --  |
|            | Ca(ICC2/PI489777)SNP_22329 | 661   | T | C | 47  | 13 | -- | --  |
| CakTC38184 | Ca(ICC2/PI489777)SNP_22330 | 73    | A | T | 7   | 7  | -- | --  |
|            | Ca(ICC2/PI489777)SNP_22331 | 561   | A | G | 8   | 3  | -- | --  |
| CakTC24565 | Ca(ICC2/PI489777)SNP_22332 | 328   | T | C | 5   | 3  | -- | --  |
|            | Ca(ICC2/PI489777)SNP_22333 | 1164  | G | T | 20  | 3  | -- | --  |
|            | Ca(ICC2/PI489777)SNP_22334 | 1637  | T | C | 14  | 10 | -- | --  |
|            | Ca(ICC2/PI489777)SNP_22335 | 1643  | T | C | 14  | 10 | -- | --  |
|            | Ca(ICC2/PI489777)SNP_22336 | 1864  | A | G | 14  | 4  | -- | --  |
|            | Ca(ICC2/PI489777)SNP_22337 | 2545  | A | G | 7   | 8  | -- | --  |
| CakTC28408 | Ca(ICC2/PI489777)SNP_22338 | 1762  | A | T | 13  | 11 | -- | --  |
| CakTC26448 | Ca(ICC2/PI489777)SNP_22339 | 1207  | A | T | 17  | 14 | -- | --  |
|            | Ca(ICC2/PI489777)SNP_22340 | 1713  | C | G | 12  | 11 | -- | --  |
|            | Ca(ICC2/PI489777)SNP_22341 | 1756  | G | A | 10  | 13 | -- | --  |
|            | Ca(ICC2/PI489777)SNP_22342 | 1824  | T | G | 13  | 11 | -- | --  |
|            | Ca(ICC2/PI489777)SNP_22343 | 1914  | T | C | 10  | 9  | -- | --  |

|            |                            |      |   |   |    |     |       |      |
|------------|----------------------------|------|---|---|----|-----|-------|------|
|            | Ca(ICC2/PI489777)SNP_22344 | 2218 | G | A | 8  | 10  | --    | --   |
|            | Ca(ICC2/PI489777)SNP_22345 | 2742 | C | G | 27 | 6   | --    | --   |
|            | Ca(ICC2/PI489777)SNP_22346 | 2944 | C | T | 17 | 5   | --    | --   |
| CakTC09694 | Ca(ICC2/PI489777)SNP_22347 | 269  | T | C | 6  | 4   | --    | --   |
|            | Ca(ICC2/PI489777)SNP_22348 | 499  | T | C | 4  | 4   | --    | --   |
|            | Ca(ICC2/PI489777)SNP_22349 | 500  | G | A | 4  | 4   | --    | --   |
|            | Ca(ICC2/PI489777)SNP_22350 | 521  | C | A | 4  | 4   | --    | --   |
|            | Ca(ICC2/PI489777)SNP_22351 | 541  | T | A | 4  | 4   | --    | --   |
| CakTC29159 | Ca(ICC2/PI489777)SNP_22352 | 194  | T | G | 29 | 7   | --    | --   |
|            | Ca(ICC2/PI489777)SNP_22353 | 1359 | A | C | 28 | 10  | --    | --   |
|            | Ca(ICC2/PI489777)SNP_22354 | 1692 | C | G | 23 | 12  | --    | --   |
|            | Ca(ICC2/PI489777)SNP_22355 | 1701 | G | A | 22 | 11  | --    | --   |
|            | Ca(ICC2/PI489777)SNP_22356 | 1757 | T | C | 23 | 12  | --    | --   |
|            | Ca(ICC2/PI489777)SNP_22357 | 1783 | C | T | 27 | 13  | --    | --   |
|            | Ca(ICC2/PI489777)SNP_22358 | 1793 | C | G | 27 | 13  | --    | --   |
|            | Ca(ICC2/PI489777)SNP_22359 | 2117 | G | T | 4  | 4   | --    | --   |
| CakTC42236 | Ca(ICC2/PI489777)SNP_22360 | 365  | A | G | 5  | 3   | --    | --   |
|            | Ca(ICC2/PI489777)SNP_22361 | 1471 | T | C | 13 | 13  | --    | --   |
|            | Ca(ICC2/PI489777)SNP_22362 | 1701 | A | G | 8  | 7   | --    | --   |
| CakTC40420 | Ca(ICC2/PI489777)SNP_22363 | 309  | G | T | 12 | 92  | --    | --   |
|            | Ca(ICC2/PI489777)SNP_22364 | 319  | T | C | 13 | 97  | --    | --   |
|            | Ca(ICC2/PI489777)SNP_22365 | 505  | A | G | 10 | 113 | --    | --   |
|            | Ca(ICC2/PI489777)SNP_22366 | 590  | A | G | 7  | 82  | --    | --   |
| CakTC40438 | Ca(ICC2/PI489777)SNP_22367 | 650  | A | G | 7  | 3   | --    | --   |
| CakTC38693 | Ca(ICC2/PI489777)SNP_22368 | 132  | T | G | 8  | 3   | --    | --   |
|            | Ca(ICC2/PI489777)SNP_22369 | 1121 | G | A | 9  | 6   | --    | --   |
|            | Ca(ICC2/PI489777)SNP_22370 | 1133 | A | C | 9  | 6   | --    | --   |
| CakTC37363 | Ca(ICC2/PI489777)SNP_22371 | 186  | A | T | 3  | 5   | --    | --   |
| CakTC11739 | Ca(ICC2/PI489777)SNP_22372 | 210  | A | G | 23 | 16  | --    | --   |
| CakTC01446 | Ca(ICC2/PI489777)SNP_22373 | 1799 | A | G | 4  | 10  | --    | --   |
| CakTC33086 | Ca(ICC2/PI489777)SNP_22374 | 301  | A | G | 8  | 5   | --    | --   |
|            | Ca(ICC2/PI489777)SNP_22375 | 1235 | A | G | 7  | 6   | --    | --   |
|            | Ca(ICC2/PI489777)SNP_22376 | 1532 | A | C | 14 | 9   | --    | --   |
| CakTC43077 | Ca(ICC2/PI489777)SNP_22377 | 346  | C | T | 4  | 12  | --    | --   |
| CakTC38652 | Ca(ICC2/PI489777)SNP_22378 | 89   | A | C | 11 | 4   | --    | --   |
|            | Ca(ICC2/PI489777)SNP_22379 | 367  | A | G | 28 | 14  | --    | --   |
|            | Ca(ICC2/PI489777)SNP_22380 | 892  | C | T | 11 | 5   | --    | --   |
| CakTC39918 | Ca(ICC2/PI489777)SNP_22381 | 92   | T | C | 5  | 8   | Shoot | --   |
|            | Ca(ICC2/PI489777)SNP_22382 | 172  | C | T | 4  | 8   | Shoot | --   |
|            | Ca(ICC2/PI489777)SNP_22383 | 944  | T | C | 11 | 3   | Shoot | --   |
|            | Ca(ICC2/PI489777)SNP_22384 | 947  | G | A | 12 | 3   | Shoot | --   |
|            | Ca(ICC2/PI489777)SNP_22385 | 989  | T | C | 14 | 5   | Shoot | --   |
|            | Ca(ICC2/PI489777)SNP_22386 | 1030 | C | T | 16 | 5   | Shoot | --   |
|            | Ca(ICC2/PI489777)SNP_22387 | 1060 | G | A | 13 | 4   | Shoot | --   |
| CakTC06127 | Ca(ICC2/PI489777)SNP_22388 | 617  | C | T | 12 | 3   | --    | WRKY |
| CakTC33286 | Ca(ICC2/PI489777)SNP_22389 | 765  | T | C | 4  | 5   | --    | --   |
|            | Ca(ICC2/PI489777)SNP_22390 | 871  | G | C | 7  | 3   | --    | --   |
|            | Ca(ICC2/PI489777)SNP_22391 | 953  | C | A | 7  | 3   | --    | --   |
|            | Ca(ICC2/PI489777)SNP_22392 | 2152 | T | C | 12 | 6   | --    | --   |
| CakTC41316 | Ca(ICC2/PI489777)SNP_22393 | 1584 | A | G | 11 | 12  | --    | --   |
|            | Ca(ICC2/PI489777)SNP_22394 | 1749 | A | T | 10 | 15  | --    | --   |
|            | Ca(ICC2/PI489777)SNP_22395 | 1917 | A | G | 6  | 9   | --    | --   |
|            | Ca(ICC2/PI489777)SNP_22396 | 2052 | T | C | 13 | 16  | --    | --   |
|            | Ca(ICC2/PI489777)SNP_22397 | 2375 | T | A | 9  | 9   | --    | --   |
|            | Ca(ICC2/PI489777)SNP_22398 | 2394 | G | A | 10 | 8   | --    | --   |
|            | Ca(ICC2/PI489777)SNP_22399 | 2395 | A | G | 10 | 8   | --    | --   |
|            | Ca(ICC2/PI489777)SNP_22400 | 2410 | A | G | 7  | 8   | --    | --   |
| CakTC40691 | Ca(ICC2/PI489777)SNP_22401 | 332  | C | T | 12 | 3   | --    | --   |
|            | Ca(ICC2/PI489777)SNP_22402 | 344  | G | C | 13 | 3   | --    | --   |
|            | Ca(ICC2/PI489777)SNP_22403 | 385  | T | G | 17 | 3   | --    | --   |
|            | Ca(ICC2/PI489777)SNP_22404 | 425  | G | T | 19 | 4   | --    | --   |
|            | Ca(ICC2/PI489777)SNP_22405 | 989  | T | C | 6  | 7   | --    | --   |
|            | Ca(ICC2/PI489777)SNP_22406 | 1385 | T | C | 14 | 9   | --    | --   |
|            | Ca(ICC2/PI489777)SNP_22407 | 1484 | C | T | 11 | 6   | --    | --   |
|            | Ca(ICC2/PI489777)SNP_22408 | 1607 | G | A | 16 | 3   | --    | --   |
| CakTC42034 | Ca(ICC2/PI489777)SNP_22409 | 733  | G | A | 3  | 5   | --    | --   |
|            | Ca(ICC2/PI489777)SNP_22410 | 736  | A | G | 3  | 5   | --    | --   |
| CakTC12642 | Ca(ICC2/PI489777)SNP_22411 | 1633 | A | G | 9  | 3   | --    | --   |
| CakTC11657 | Ca(ICC2/PI489777)SNP_22412 | 764  | T | C | 49 | 31  | --    | --   |
|            | Ca(ICC2/PI489777)SNP_22413 | 2756 | G | A | 7  | 9   | --    | --   |
| CakTC35752 | Ca(ICC2/PI489777)SNP_22414 | 730  | A | T | 5  | 3   | --    | --   |
|            | Ca(ICC2/PI489777)SNP_22415 | 1491 | T | C | 6  | 3   | --    | --   |
|            | Ca(ICC2/PI489777)SNP_22416 | 1508 | T | G | 6  | 3   | --    | --   |
|            | Ca(ICC2/PI489777)SNP_22417 | 1709 | G | A | 7  | 3   | --    | --   |

|            |                            |      |   |   |     |    |      |    |
|------------|----------------------------|------|---|---|-----|----|------|----|
|            | Ca(ICC2/PI489777)SNP_22418 | 1972 | G | T | 10  | 4  | --   | -- |
|            | Ca(ICC2/PI489777)SNP_22419 | 2322 | G | A | 3   | 3  | --   | -- |
| CakTC41091 | Ca(ICC2/PI489777)SNP_22420 | 140  | G | A | 8   | 10 | --   | -- |
|            | Ca(ICC2/PI489777)SNP_22421 | 453  | G | A | 7   | 6  | --   | -- |
| CakTC43348 | Ca(ICC2/PI489777)SNP_22422 | 711  | C | T | 34  | 17 | --   | -- |
|            | Ca(ICC2/PI489777)SNP_22423 | 747  | T | C | 39  | 16 | --   | -- |
|            | Ca(ICC2/PI489777)SNP_22424 | 931  | A | T | 29  | 16 | --   | -- |
|            | Ca(ICC2/PI489777)SNP_22425 | 941  | G | A | 47  | 16 | --   | -- |
|            | Ca(ICC2/PI489777)SNP_22426 | 1467 | A | T | 43  | 29 | --   | -- |
|            | Ca(ICC2/PI489777)SNP_22427 | 1703 | A | G | 30  | 22 | --   | -- |
|            | Ca(ICC2/PI489777)SNP_22428 | 1771 | T | C | 26  | 21 | --   | -- |
|            | Ca(ICC2/PI489777)SNP_22429 | 1841 | T | C | 21  | 11 | --   | -- |
| CakTC41199 | Ca(ICC2/PI489777)SNP_22430 | 2274 | A | T | 3   | 3  | --   | -- |
| CakTC38200 | Ca(ICC2/PI489777)SNP_22431 | 206  | C | T | 6   | 9  | --   | -- |
|            | Ca(ICC2/PI489777)SNP_22432 | 531  | A | T | 14  | 7  | --   | -- |
| CakTC42563 | Ca(ICC2/PI489777)SNP_22433 | 521  | G | A | 85  | 55 | --   | -- |
| CakTC43160 | Ca(ICC2/PI489777)SNP_22434 | 152  | T | C | 23  | 3  | --   | -- |
|            | Ca(ICC2/PI489777)SNP_22435 | 766  | G | A | 4   | 5  | --   | -- |
| CakTC32331 | Ca(ICC2/PI489777)SNP_22436 | 115  | A | G | 18  | 6  | --   | -- |
|            | Ca(ICC2/PI489777)SNP_22437 | 229  | T | C | 19  | 7  | --   | -- |
|            | Ca(ICC2/PI489777)SNP_22438 | 250  | C | T | 19  | 7  | --   | -- |
|            | Ca(ICC2/PI489777)SNP_22439 | 742  | G | T | 8   | 9  | --   | -- |
|            | Ca(ICC2/PI489777)SNP_22440 | 994  | T | C | 9   | 10 | --   | -- |
|            | Ca(ICC2/PI489777)SNP_22441 | 1045 | C | T | 7   | 8  | --   | -- |
| CakTC28416 | Ca(ICC2/PI489777)SNP_22442 | 387  | A | T | 11  | 26 | --   | -- |
| CakTC30723 | Ca(ICC2/PI489777)SNP_22443 | 828  | G | C | 3   | 3  | Root | -- |
|            | Ca(ICC2/PI489777)SNP_22444 | 999  | T | C | 4   | 4  | Root | -- |
| CakTC26088 | Ca(ICC2/PI489777)SNP_22445 | 1192 | T | C | 12  | 4  | --   | -- |
| CakTC09232 | Ca(ICC2/PI489777)SNP_22446 | 145  | T | C | 3   | 3  | --   | -- |
|            | Ca(ICC2/PI489777)SNP_22447 | 146  | G | A | 3   | 3  | --   | -- |
| CakTC43336 | Ca(ICC2/PI489777)SNP_22448 | 1757 | C | T | 28  | 6  | --   | -- |
| CakTC39382 | Ca(ICC2/PI489777)SNP_22449 | 104  | G | A | 9   | 6  | --   | -- |
|            | Ca(ICC2/PI489777)SNP_22450 | 712  | A | G | 35  | 15 | --   | -- |
| CakTC25458 | Ca(ICC2/PI489777)SNP_22451 | 834  | T | C | 30  | 7  | --   | -- |
|            | Ca(ICC2/PI489777)SNP_22452 | 858  | A | G | 29  | 8  | --   | -- |
|            | Ca(ICC2/PI489777)SNP_22453 | 930  | C | G | 39  | 10 | --   | -- |
|            | Ca(ICC2/PI489777)SNP_22454 | 2183 | C | A | 32  | 10 | --   | -- |
|            | Ca(ICC2/PI489777)SNP_22455 | 2224 | T | C | 30  | 10 | --   | -- |
| CakTC01830 | Ca(ICC2/PI489777)SNP_22456 | 85   | G | C | 13  | 6  | --   | -- |
| CakTC06047 | Ca(ICC2/PI489777)SNP_22457 | 1079 | T | C | 7   | 8  | --   | -- |
| CakTC27258 | Ca(ICC2/PI489777)SNP_22458 | 140  | C | T | 4   | 5  | --   | -- |
|            | Ca(ICC2/PI489777)SNP_22459 | 1015 | A | G | 20  | 27 | --   | -- |
|            | Ca(ICC2/PI489777)SNP_22460 | 1171 | G | A | 22  | 11 | --   | -- |
| CakTC37847 | Ca(ICC2/PI489777)SNP_22461 | 439  | G | A | 10  | 13 | --   | -- |
|            | Ca(ICC2/PI489777)SNP_22462 | 785  | G | A | 24  | 15 | --   | -- |
| CakTC38865 | Ca(ICC2/PI489777)SNP_22463 | 1047 | A | G | 5   | 13 | --   | -- |
|            | Ca(ICC2/PI489777)SNP_22464 | 1142 | C | T | 6   | 14 | --   | -- |
|            | Ca(ICC2/PI489777)SNP_22465 | 1312 | A | G | 5   | 10 | --   | -- |
| CakTC34232 | Ca(ICC2/PI489777)SNP_22466 | 96   | C | T | 4   | 3  | --   | -- |
|            | Ca(ICC2/PI489777)SNP_22467 | 1061 | T | A | 12  | 13 | --   | -- |
|            | Ca(ICC2/PI489777)SNP_22468 | 1652 | G | A | 18  | 9  | --   | -- |
|            | Ca(ICC2/PI489777)SNP_22469 | 1954 | G | T | 19  | 10 | --   | -- |
| CakTC39208 | Ca(ICC2/PI489777)SNP_22470 | 855  | G | C | 5   | 7  | --   | -- |
|            | Ca(ICC2/PI489777)SNP_22471 | 1068 | T | C | 10  | 16 | --   | -- |
|            | Ca(ICC2/PI489777)SNP_22472 | 1137 | G | T | 10  | 19 | --   | -- |
| CakTC37355 | Ca(ICC2/PI489777)SNP_22473 | 475  | A | G | 13  | 7  | --   | -- |
| CakTC23841 | Ca(ICC2/PI489777)SNP_22474 | 419  | G | A | 9   | 5  | --   | -- |
|            | Ca(ICC2/PI489777)SNP_22475 | 516  | T | C | 10  | 6  | --   | -- |
| CakTC29478 | Ca(ICC2/PI489777)SNP_22476 | 183  | A | C | 8   | 5  | --   | -- |
|            | Ca(ICC2/PI489777)SNP_22477 | 260  | G | C | 9   | 6  | --   | -- |
| CakTC37564 | Ca(ICC2/PI489777)SNP_22478 | 356  | A | C | 13  | 23 | --   | -- |
| CakTC40216 | Ca(ICC2/PI489777)SNP_22479 | 413  | C | T | 6   | 6  | --   | -- |
|            | Ca(ICC2/PI489777)SNP_22480 | 584  | T | C | 6   | 5  | --   | -- |
|            | Ca(ICC2/PI489777)SNP_22481 | 692  | C | T | 5   | 5  | --   | -- |
|            | Ca(ICC2/PI489777)SNP_22482 | 859  | G | T | 7   | 5  | --   | -- |
| CakTC40713 | Ca(ICC2/PI489777)SNP_22483 | 332  | T | C | 194 | 15 | --   | -- |
|            | Ca(ICC2/PI489777)SNP_22484 | 354  | C | A | 196 | 34 | --   | -- |
|            | Ca(ICC2/PI489777)SNP_22485 | 371  | T | C | 202 | 34 | --   | -- |
|            | Ca(ICC2/PI489777)SNP_22486 | 464  | C | T | 202 | 34 | --   | -- |
| CakTC24173 | Ca(ICC2/PI489777)SNP_22487 | 772  | T | A | 33  | 8  | --   | -- |
| CakTC10625 | Ca(ICC2/PI489777)SNP_22488 | 240  | G | C | 29  | 3  | --   | -- |
| CakTC23616 | Ca(ICC2/PI489777)SNP_22489 | 91   | C | A | 14  | 5  | --   | -- |
|            | Ca(ICC2/PI489777)SNP_22490 | 474  | C | T | 91  | 53 | --   | -- |
|            | Ca(ICC2/PI489777)SNP_22491 | 588  | G | T | 105 | 73 | --   | -- |



|            |                            |      |   |   |     |    |           |    |
|------------|----------------------------|------|---|---|-----|----|-----------|----|
|            | Ca(ICC2/PI489777)SNP_22492 | 660  | T | A | 119 | 83 | --        | -- |
|            | Ca(ICC2/PI489777)SNP_22493 | 693  | G | A | 113 | 76 | --        | -- |
|            | Ca(ICC2/PI489777)SNP_22494 | 723  | C | T | 114 | 77 | --        | -- |
|            | Ca(ICC2/PI489777)SNP_22495 | 1120 | G | T | 6   | 22 | --        | -- |
|            | Ca(ICC2/PI489777)SNP_22496 | 1394 | G | A | 15  | 3  | --        | -- |
|            | Ca(ICC2/PI489777)SNP_22497 | 2455 | C | A | 22  | 24 | --        | -- |
| CakTC36110 | Ca(ICC2/PI489777)SNP_22498 | 1035 | A | G | 5   | 5  | --        | -- |
|            | Ca(ICC2/PI489777)SNP_22499 | 5391 | A | G | 7   | 7  | --        | -- |
| CakTC36259 | Ca(ICC2/PI489777)SNP_22500 | 2379 | T | A | 17  | 9  | --        | HB |
|            | Ca(ICC2/PI489777)SNP_22501 | 2478 | G | C | 20  | 11 | --        | HB |
| CakTC41755 | Ca(ICC2/PI489777)SNP_22502 | 2325 | T | G | 3   | 3  | --        | -- |
| CakTC24923 | Ca(ICC2/PI489777)SNP_22503 | 151  | G | A | 29  | 16 | --        | -- |
|            | Ca(ICC2/PI489777)SNP_22504 | 269  | G | A | 37  | 28 | --        | -- |
|            | Ca(ICC2/PI489777)SNP_22505 | 945  | G | A | 29  | 3  | --        | -- |
| CakTC39040 | Ca(ICC2/PI489777)SNP_22506 | 430  | G | A | 10  | 16 | --        | -- |
|            | Ca(ICC2/PI489777)SNP_22507 | 598  | C | T | 9   | 14 | --        | -- |
|            | Ca(ICC2/PI489777)SNP_22508 | 628  | C | T | 8   | 12 | --        | -- |
|            | Ca(ICC2/PI489777)SNP_22509 | 781  | G | A | 6   | 10 | --        | -- |
| CakTC36726 | Ca(ICC2/PI489777)SNP_22510 | 766  | G | A | 14  | 8  | --        | -- |
|            | Ca(ICC2/PI489777)SNP_22511 | 811  | T | C | 13  | 5  | --        | -- |
|            | Ca(ICC2/PI489777)SNP_22512 | 913  | A | G | 15  | 6  | --        | -- |
|            | Ca(ICC2/PI489777)SNP_22513 | 1228 | T | G | 19  | 5  | --        | -- |
|            | Ca(ICC2/PI489777)SNP_22514 | 1258 | G | A | 17  | 5  | --        | -- |
|            | Ca(ICC2/PI489777)SNP_22515 | 1357 | T | C | 18  | 4  | --        | -- |
|            | Ca(ICC2/PI489777)SNP_22516 | 1921 | C | T | 10  | 3  | --        | -- |
|            | Ca(ICC2/PI489777)SNP_22517 | 2110 | C | T | 14  | 6  | --        | -- |
|            | Ca(ICC2/PI489777)SNP_22518 | 2242 | A | G | 22  | 8  | --        | -- |
| CakTC35716 | Ca(ICC2/PI489777)SNP_22519 | 974  | T | C | 11  | 9  | --        | -- |
|            | Ca(ICC2/PI489777)SNP_22520 | 1493 | A | G | 15  | 14 | --        | -- |
|            | Ca(ICC2/PI489777)SNP_22521 | 1862 | A | T | 14  | 7  | --        | -- |
|            | Ca(ICC2/PI489777)SNP_22522 | 2216 | C | T | 5   | 14 | --        | -- |
| CakTC10808 | Ca(ICC2/PI489777)SNP_22523 | 316  | A | C | 13  | 3  | --        | -- |
| CakTC25323 | Ca(ICC2/PI489777)SNP_22524 | 2419 | T | G | 7   | 5  | --        | -- |
|            | Ca(ICC2/PI489777)SNP_22525 | 2830 | T | C | 13  | 7  | --        | -- |
|            | Ca(ICC2/PI489777)SNP_22526 | 2911 | G | A | 7   | 6  | --        | -- |
|            | Ca(ICC2/PI489777)SNP_22527 | 3184 | G | A | 11  | 5  | --        | -- |
|            | Ca(ICC2/PI489777)SNP_22528 | 3334 | T | C | 9   | 4  | --        | -- |
|            | Ca(ICC2/PI489777)SNP_22529 | 3396 | A | G | 6   | 4  | --        | -- |
|            | Ca(ICC2/PI489777)SNP_22530 | 3613 | A | G | 3   | 11 | --        | -- |
|            | Ca(ICC2/PI489777)SNP_22531 | 3880 | A | C | 11  | 12 | --        | -- |
|            | Ca(ICC2/PI489777)SNP_22532 | 3943 | A | G | 28  | 15 | --        | -- |
| CakTC25407 | Ca(ICC2/PI489777)SNP_22533 | 2795 | G | A | 6   | 5  | Young_pod | -- |
| CakTC32586 | Ca(ICC2/PI489777)SNP_22534 | 35   | T | C | 3   | 3  | --        | -- |
|            | Ca(ICC2/PI489777)SNP_22535 | 109  | T | G | 3   | 3  | --        | -- |
|            | Ca(ICC2/PI489777)SNP_22536 | 310  | A | G | 3   | 3  | --        | -- |
| CakTC35871 | Ca(ICC2/PI489777)SNP_22537 | 411  | A | G | 4   | 5  | --        | -- |
| CakTC01293 | Ca(ICC2/PI489777)SNP_22538 | 299  | C | T | 10  | 3  | --        | -- |
|            | Ca(ICC2/PI489777)SNP_22539 | 440  | T | G | 8   | 7  | --        | -- |
|            | Ca(ICC2/PI489777)SNP_22540 | 463  | C | G | 10  | 8  | --        | -- |
|            | Ca(ICC2/PI489777)SNP_22541 | 681  | T | A | 7   | 4  | --        | -- |
| CakTC27651 | Ca(ICC2/PI489777)SNP_22542 | 403  | A | G | 3   | 6  | --        | -- |
|            | Ca(ICC2/PI489777)SNP_22543 | 526  | T | C | 7   | 7  | --        | -- |
| CakTC31607 | Ca(ICC2/PI489777)SNP_22544 | 153  | A | T | 5   | 3  | --        | -- |
|            | Ca(ICC2/PI489777)SNP_22545 | 168  | T | C | 5   | 3  | --        | -- |
|            | Ca(ICC2/PI489777)SNP_22546 | 907  | T | C | 6   | 7  | --        | -- |
|            | Ca(ICC2/PI489777)SNP_22547 | 914  | T | C | 3   | 7  | --        | -- |
|            | Ca(ICC2/PI489777)SNP_22548 | 925  | C | T | 4   | 6  | --        | -- |
|            | Ca(ICC2/PI489777)SNP_22549 | 1017 | A | G | 4   | 8  | --        | -- |
|            | Ca(ICC2/PI489777)SNP_22550 | 1158 | A | G | 4   | 4  | --        | -- |
|            | Ca(ICC2/PI489777)SNP_22551 | 2223 | A | C | 5   | 4  | --        | -- |
|            | Ca(ICC2/PI489777)SNP_22552 | 2302 | C | G | 4   | 4  | --        | -- |
| CakTC32928 | Ca(ICC2/PI489777)SNP_22553 | 571  | T | G | 8   | 3  | --        | -- |
|            | Ca(ICC2/PI489777)SNP_22554 | 615  | T | G | 6   | 3  | --        | -- |
| CakTC42506 | Ca(ICC2/PI489777)SNP_22555 | 170  | C | T | 5   | 7  | --        | -- |
|            | Ca(ICC2/PI489777)SNP_22556 | 185  | T | C | 7   | 7  | --        | -- |
|            | Ca(ICC2/PI489777)SNP_22557 | 425  | C | T | 9   | 11 | --        | -- |
|            | Ca(ICC2/PI489777)SNP_22558 | 821  | C | G | 14  | 6  | --        | -- |
|            | Ca(ICC2/PI489777)SNP_22559 | 845  | G | A | 14  | 5  | --        | -- |
|            | Ca(ICC2/PI489777)SNP_22560 | 1028 | A | G | 8   | 7  | --        | -- |
|            | Ca(ICC2/PI489777)SNP_22561 | 1625 | G | A | 10  | 11 | --        | -- |
| CakTC35926 | Ca(ICC2/PI489777)SNP_22562 | 955  | G | T | 14  | 10 | --        | -- |
| CakTC07794 | Ca(ICC2/PI489777)SNP_22563 | 83   | C | T | 6   | 9  | --        | -- |
|            | Ca(ICC2/PI489777)SNP_22564 | 282  | T | C | 5   | 7  | --        | -- |
|            | Ca(ICC2/PI489777)SNP_22565 | 342  | C | T | 6   | 9  | --        | -- |

|            |                            |      |   |   |    |    |        |         |
|------------|----------------------------|------|---|---|----|----|--------|---------|
| CakTC28045 | Ca(ICC2/P1489777)SNP_22566 | 315  | T | C | 14 | 7  | --     | --      |
|            | Ca(ICC2/P1489777)SNP_22567 | 491  | G | C | 10 | 8  | --     | --      |
|            | Ca(ICC2/P1489777)SNP_22568 | 1275 | A | C | 14 | 10 | --     | --      |
|            | Ca(ICC2/P1489777)SNP_22569 | 1287 | G | A | 15 | 11 | --     | --      |
|            | Ca(ICC2/P1489777)SNP_22570 | 1642 | C | T | 8  | 7  | --     | --      |
|            | Ca(ICC2/P1489777)SNP_22571 | 1746 | A | G | 8  | 5  | --     | --      |
|            | Ca(ICC2/P1489777)SNP_22572 | 2121 | T | C | 6  | 3  | --     | --      |
|            | Ca(ICC2/P1489777)SNP_22573 | 2316 | G | T | 17 | 5  | --     | --      |
|            | Ca(ICC2/P1489777)SNP_22574 | 3189 | C | T | 7  | 7  | --     | --      |
|            | Ca(ICC2/P1489777)SNP_22575 | 3935 | C | G | 8  | 4  | --     | --      |
| CakTC34569 | Ca(ICC2/P1489777)SNP_22576 | 135  | G | C | 3  | 8  | --     | --      |
|            | Ca(ICC2/P1489777)SNP_22577 | 426  | A | C | 3  | 10 | --     | --      |
|            | Ca(ICC2/P1489777)SNP_22578 | 732  | T | C | 5  | 7  | --     | --      |
| CakTC38304 | Ca(ICC2/P1489777)SNP_22579 | 41   | A | C | 6  | 3  | --     | --      |
|            | Ca(ICC2/P1489777)SNP_22580 | 317  | A | G | 15 | 12 | --     | --      |
|            | Ca(ICC2/P1489777)SNP_22581 | 381  | A | G | 11 | 12 | --     | --      |
| CakTC04032 | Ca(ICC2/P1489777)SNP_22582 | 264  | T | G | 13 | 7  | --     | --      |
| CakTC37742 | Ca(ICC2/P1489777)SNP_22583 | 259  | C | G | 35 | 6  | Flower | bud     |
|            | Ca(ICC2/P1489777)SNP_22584 | 304  | C | G | 46 | 8  | Flower | bud     |
|            | Ca(ICC2/P1489777)SNP_22585 | 934  | T | G | 38 | 14 | Flower | bud     |
|            | Ca(ICC2/P1489777)SNP_22586 | 1303 | C | T | 24 | 10 | Flower | bud     |
|            | Ca(ICC2/P1489777)SNP_22587 | 1627 | T | C | 27 | 17 | Flower | bud     |
| CakTC39189 | Ca(ICC2/P1489777)SNP_22588 | 917  | G | A | 3  | 6  | --     | --      |
|            | Ca(ICC2/P1489777)SNP_22589 | 1016 | G | A | 3  | 5  | --     | --      |
|            | Ca(ICC2/P1489777)SNP_22590 | 1209 | T | C | 3  | 4  | --     | --      |
| CakTC39683 | Ca(ICC2/P1489777)SNP_22591 | 184  | C | A | 3  | 3  | --     | --      |
|            | Ca(ICC2/P1489777)SNP_22592 | 212  | G | A | 3  | 4  | --     | --      |
|            | Ca(ICC2/P1489777)SNP_22593 | 332  | T | G | 4  | 3  | --     | --      |
|            | Ca(ICC2/P1489777)SNP_22594 | 792  | G | A | 17 | 13 | --     | --      |
|            | Ca(ICC2/P1489777)SNP_22595 | 1239 | G | A | 9  | 3  | --     | --      |
|            | Ca(ICC2/P1489777)SNP_22596 | 1309 | C | A | 8  | 3  | --     | --      |
| CakTC27472 | Ca(ICC2/P1489777)SNP_22597 | 728  | A | T | 4  | 4  | --     | G2-like |
|            | Ca(ICC2/P1489777)SNP_22598 | 767  | T | C | 4  | 5  | --     | G2-like |
| CakTC27530 | Ca(ICC2/P1489777)SNP_22599 | 245  | G | C | 6  | 6  | --     | --      |
|            | Ca(ICC2/P1489777)SNP_22600 | 351  | A | T | 9  | 6  | --     | --      |
|            | Ca(ICC2/P1489777)SNP_22601 | 372  | G | A | 8  | 7  | --     | --      |
|            | Ca(ICC2/P1489777)SNP_22602 | 374  | C | T | 10 | 7  | --     | --      |
| CakTC40500 | Ca(ICC2/P1489777)SNP_22603 | 14   | A | G | 12 | 7  | --     | --      |
|            | Ca(ICC2/P1489777)SNP_22604 | 141  | C | T | 51 | 54 | --     | --      |
|            | Ca(ICC2/P1489777)SNP_22605 | 159  | T | A | 51 | 56 | --     | --      |
| CakTC40116 | Ca(ICC2/P1489777)SNP_22606 | 562  | C | A | 29 | 21 | --     | zf-HD   |
|            | Ca(ICC2/P1489777)SNP_22607 | 704  | T | C | 25 | 18 | --     | zf-HD   |
|            | Ca(ICC2/P1489777)SNP_22608 | 1317 | A | G | 5  | 4  | --     | zf-HD   |
| CakTC34771 | Ca(ICC2/P1489777)SNP_22609 | 1962 | C | T | 37 | 5  | Shoot  | --      |
|            | Ca(ICC2/P1489777)SNP_22610 | 2129 | C | A | 25 | 9  | Shoot  | --      |
|            | Ca(ICC2/P1489777)SNP_22611 | 2136 | A | G | 25 | 9  | Shoot  | --      |
|            | Ca(ICC2/P1489777)SNP_22612 | 2568 | T | C | 34 | 7  | Shoot  | --      |
|            | Ca(ICC2/P1489777)SNP_22613 | 3243 | A | T | 35 | 9  | Shoot  | --      |
|            | Ca(ICC2/P1489777)SNP_22614 | 3701 | G | C | 25 | 5  | Shoot  | --      |
|            | Ca(ICC2/P1489777)SNP_22615 | 3903 | C | G | 23 | 5  | Shoot  | --      |
| CakTC41956 | Ca(ICC2/P1489777)SNP_22616 | 582  | T | C | 9  | 4  | Root   | --      |
| CakTC11585 | Ca(ICC2/P1489777)SNP_22617 | 167  | G | A | 7  | 3  | --     | --      |
|            | Ca(ICC2/P1489777)SNP_22618 | 195  | A | C | 6  | 3  | --     | --      |
|            | Ca(ICC2/P1489777)SNP_22619 | 613  | C | T | 7  | 4  | --     | --      |
| CakTC38273 | Ca(ICC2/P1489777)SNP_22620 | 1068 | A | C | 4  | 8  | --     | --      |
| CakTC39429 | Ca(ICC2/P1489777)SNP_22621 | 452  | A | G | 10 | 4  | --     | --      |
| CakTC10207 | Ca(ICC2/P1489777)SNP_22622 | 595  | C | T | 5  | 17 | --     | --      |
|            | Ca(ICC2/P1489777)SNP_22623 | 1101 | T | G | 4  | 10 | --     | --      |
|            | Ca(ICC2/P1489777)SNP_22624 | 1219 | G | A | 4  | 3  | --     | --      |
|            | Ca(ICC2/P1489777)SNP_22625 | 1291 | G | C | 5  | 3  | --     | --      |
| CakTC37226 | Ca(ICC2/P1489777)SNP_22626 | 369  | A | G | 16 | 20 | --     | --      |
|            | Ca(ICC2/P1489777)SNP_22627 | 420  | C | T | 13 | 18 | --     | --      |
|            | Ca(ICC2/P1489777)SNP_22628 | 783  | A | T | 19 | 16 | --     | --      |
| CakTC11664 | Ca(ICC2/P1489777)SNP_22629 | 1665 | G | C | 33 | 19 | --     | --      |
| CakTC31643 | Ca(ICC2/P1489777)SNP_22630 | 1850 | T | G | 22 | 9  | --     | --      |
|            | Ca(ICC2/P1489777)SNP_22631 | 1949 | A | G | 4  | 5  | --     | --      |
|            | Ca(ICC2/P1489777)SNP_22632 | 2088 | C | A | 3  | 4  | --     | --      |
| CakTC36624 | Ca(ICC2/P1489777)SNP_22633 | 126  | G | A | 8  | 4  | --     | --      |
|            | Ca(ICC2/P1489777)SNP_22634 | 152  | A | G | 9  | 4  | --     | --      |
|            | Ca(ICC2/P1489777)SNP_22635 | 421  | G | A | 6  | 6  | --     | --      |
|            | Ca(ICC2/P1489777)SNP_22636 | 2422 | T | C | 9  | 4  | --     | --      |
|            | Ca(ICC2/P1489777)SNP_22637 | 2817 | C | G | 9  | 18 | --     | --      |
|            | Ca(ICC2/P1489777)SNP_22638 | 3662 | C | T | 5  | 6  | --     | --      |
|            | Ca(ICC2/P1489777)SNP_22639 | 3799 | A | G | 8  | 3  | --     | --      |

|            |                            |      |   |   |    |    |           |      |
|------------|----------------------------|------|---|---|----|----|-----------|------|
|            | Ca(ICC2/PI489777)SNP_22640 | 3861 | G | A | 7  | 3  | --        | --   |
| CakTC27029 | Ca(ICC2/PI489777)SNP_22641 | 53   | G | T | 4  | 4  | --        | SET  |
| CakTC30466 | Ca(ICC2/PI489777)SNP_22642 | 544  | C | T | 5  | 4  | --        | --   |
|            | Ca(ICC2/PI489777)SNP_22643 | 1117 | T | C | 9  | 5  | --        | --   |
|            | Ca(ICC2/PI489777)SNP_22644 | 1128 | C | A | 10 | 3  | --        | --   |
|            | Ca(ICC2/PI489777)SNP_22645 | 1197 | G | T | 10 | 3  | --        | --   |
| CakTC42225 | Ca(ICC2/PI489777)SNP_22646 | 228  | A | G | 48 | 71 | --        | --   |
| CakTC40684 | Ca(ICC2/PI489777)SNP_22647 | 1645 | T | A | 6  | 5  | --        | --   |
|            | Ca(ICC2/PI489777)SNP_22648 | 1958 | G | A | 4  | 5  | --        | --   |
| CakTC12224 | Ca(ICC2/PI489777)SNP_22649 | 474  | A | C | 11 | 3  | --        | --   |
|            | Ca(ICC2/PI489777)SNP_22650 | 475  | A | C | 11 | 3  | --        | --   |
|            | Ca(ICC2/PI489777)SNP_22651 | 723  | C | T | 10 | 3  | --        | --   |
| CakTC14242 | Ca(ICC2/PI489777)SNP_22652 | 118  | G | A | 7  | 3  | --        | --   |
|            | Ca(ICC2/PI489777)SNP_22653 | 285  | G | A | 7  | 5  | --        | --   |
|            | Ca(ICC2/PI489777)SNP_22654 | 451  | T | C | 4  | 7  | --        | --   |
|            | Ca(ICC2/PI489777)SNP_22655 | 540  | G | A | 4  | 6  | --        | --   |
| CakTC25940 | Ca(ICC2/PI489777)SNP_22656 | 306  | A | G | 27 | 10 | --        | HB   |
|            | Ca(ICC2/PI489777)SNP_22657 | 312  | G | A | 28 | 12 | --        | HB   |
|            | Ca(ICC2/PI489777)SNP_22658 | 570  | G | A | 38 | 16 | --        | HB   |
| CakTC25568 | Ca(ICC2/PI489777)SNP_22659 | 1418 | C | T | 4  | 4  | --        | --   |
| CakTC41192 | Ca(ICC2/PI489777)SNP_22660 | 247  | C | T | 6  | 5  | --        | --   |
|            | Ca(ICC2/PI489777)SNP_22661 | 257  | G | A | 6  | 5  | --        | --   |
|            | Ca(ICC2/PI489777)SNP_22662 | 444  | C | T | 8  | 5  | --        | --   |
|            | Ca(ICC2/PI489777)SNP_22663 | 532  | C | T | 7  | 3  | --        | --   |
| CakTC25225 | Ca(ICC2/PI489777)SNP_22664 | 1857 | C | T | 15 | 8  | Young_pod | --   |
|            | Ca(ICC2/PI489777)SNP_22665 | 1858 | A | C | 15 | 8  | Young_pod | --   |
|            | Ca(ICC2/PI489777)SNP_22666 | 2054 | G | C | 10 | 8  | Young_pod | --   |
|            | Ca(ICC2/PI489777)SNP_22667 | 2069 | C | T | 11 | 8  | Young_pod | --   |
|            | Ca(ICC2/PI489777)SNP_22668 | 2100 | A | G | 9  | 7  | Young_pod | --   |
|            | Ca(ICC2/PI489777)SNP_22669 | 2156 | C | G | 7  | 3  | Young_pod | --   |
| CakTC22837 | Ca(ICC2/PI489777)SNP_22670 | 74   | G | C | 16 | 6  | --        | --   |
|            | Ca(ICC2/PI489777)SNP_22671 | 226  | A | T | 35 | 20 | --        | --   |
|            | Ca(ICC2/PI489777)SNP_22672 | 834  | G | T | 4  | 3  | --        | --   |
| CakTC08767 | Ca(ICC2/PI489777)SNP_22673 | 573  | C | A | 4  | 3  | --        | bHLH |
| CakTC38515 | Ca(ICC2/PI489777)SNP_22674 | 416  | T | C | 7  | 8  | --        | --   |
|            | Ca(ICC2/PI489777)SNP_22675 | 735  | C | A | 9  | 13 | --        | --   |
| CakTC26366 | Ca(ICC2/PI489777)SNP_22676 | 1136 | C | T | 21 | 25 | --        | --   |
|            | Ca(ICC2/PI489777)SNP_22677 | 1232 | C | T | 14 | 20 | --        | --   |
|            | Ca(ICC2/PI489777)SNP_22678 | 1353 | G | T | 6  | 9  | --        | --   |
| CakTC40009 | Ca(ICC2/PI489777)SNP_22679 | 265  | A | G | 16 | 4  | --        | --   |
|            | Ca(ICC2/PI489777)SNP_22680 | 355  | T | C | 58 | 18 | --        | --   |
|            | Ca(ICC2/PI489777)SNP_22681 | 964  | A | T | 36 | 21 | --        | --   |
|            | Ca(ICC2/PI489777)SNP_22682 | 982  | G | T | 31 | 20 | --        | --   |
|            | Ca(ICC2/PI489777)SNP_22683 | 1156 | A | G | 30 | 14 | --        | --   |
| CakTC25894 | Ca(ICC2/PI489777)SNP_22684 | 110  | C | A | 17 | 9  | --        | --   |
|            | Ca(ICC2/PI489777)SNP_22685 | 912  | C | T | 49 | 8  | --        | --   |
|            | Ca(ICC2/PI489777)SNP_22686 | 987  | A | C | 47 | 5  | --        | --   |
|            | Ca(ICC2/PI489777)SNP_22687 | 1114 | C | G | 43 | 9  | --        | --   |
|            | Ca(ICC2/PI489777)SNP_22688 | 1129 | C | A | 38 | 9  | --        | --   |
|            | Ca(ICC2/PI489777)SNP_22689 | 1241 | G | C | 22 | 9  | --        | --   |
|            | Ca(ICC2/PI489777)SNP_22690 | 1268 | G | T | 17 | 6  | --        | --   |
| CakTC27583 | Ca(ICC2/PI489777)SNP_22691 | 225  | T | C | 17 | 6  | --        | --   |
| CakTC37507 | Ca(ICC2/PI489777)SNP_22692 | 151  | T | C | 8  | 4  | --        | --   |
|            | Ca(ICC2/PI489777)SNP_22693 | 291  | C | A | 10 | 4  | --        | --   |
| CakTC41777 | Ca(ICC2/PI489777)SNP_22694 | 132  | C | A | 6  | 7  | --        | --   |
|            | Ca(ICC2/PI489777)SNP_22695 | 1179 | T | C | 8  | 8  | --        | --   |
|            | Ca(ICC2/PI489777)SNP_22696 | 1200 | T | G | 7  | 7  | --        | --   |
|            | Ca(ICC2/PI489777)SNP_22697 | 1366 | C | T | 15 | 9  | --        | --   |
| CakTC31670 | Ca(ICC2/PI489777)SNP_22698 | 926  | C | T | 8  | 3  | --        | --   |
| CakTC33755 | Ca(ICC2/PI489777)SNP_22699 | 451  | G | A | 44 | 52 | --        | --   |
|            | Ca(ICC2/PI489777)SNP_22700 | 874  | T | G | 26 | 49 | --        | --   |
|            | Ca(ICC2/PI489777)SNP_22701 | 2929 | A | G | 4  | 9  | --        | --   |
| CakTC26947 | Ca(ICC2/PI489777)SNP_22702 | 15   | C | T | 30 | 18 | --        | --   |
|            | Ca(ICC2/PI489777)SNP_22703 | 37   | C | T | 28 | 21 | --        | --   |
|            | Ca(ICC2/PI489777)SNP_22704 | 81   | T | C | 39 | 31 | --        | --   |
|            | Ca(ICC2/PI489777)SNP_22705 | 459  | T | C | 30 | 30 | --        | --   |
| CakTC30693 | Ca(ICC2/PI489777)SNP_22706 | 207  | T | C | 4  | 5  | --        | --   |
|            | Ca(ICC2/PI489777)SNP_22707 | 247  | T | C | 3  | 6  | --        | --   |
|            | Ca(ICC2/PI489777)SNP_22708 | 381  | T | G | 3  | 7  | --        | --   |
| CakTC35182 | Ca(ICC2/PI489777)SNP_22709 | 217  | T | C | 8  | 3  | --        | --   |
|            | Ca(ICC2/PI489777)SNP_22710 | 3181 | C | T | 14 | 5  | --        | --   |
| CakTC22267 | Ca(ICC2/PI489777)SNP_22711 | 1309 | A | T | 22 | 8  | Flower    | bud  |
|            | Ca(ICC2/PI489777)SNP_22712 | 1435 | G | T | 33 | 9  | Flower    | bud  |
| CakTC31067 | Ca(ICC2/PI489777)SNP_22713 | 1011 | A | G | 14 | 5  | --        | --   |

|            |                            |      |   |   |     |    |           |       |
|------------|----------------------------|------|---|---|-----|----|-----------|-------|
|            | Ca(ICC2/PI489777)SNP_22714 | 1071 | G | A | 12  | 5  | --        | --    |
| CakTC37741 | Ca(ICC2/PI489777)SNP_22715 | 397  | C | A | 13  | 8  | --        | --    |
|            | Ca(ICC2/PI489777)SNP_22716 | 722  | C | T | 12  | 6  | --        | --    |
|            | Ca(ICC2/PI489777)SNP_22717 | 791  | C | A | 6   | 6  | --        | --    |
| CakTC41964 | Ca(ICC2/PI489777)SNP_22718 | 283  | A | G | 9   | 3  | --        | --    |
| CakTC08257 | Ca(ICC2/PI489777)SNP_22719 | 1364 | A | G | 3   | 3  | Flower    | bud   |
| CakTC39581 | Ca(ICC2/PI489777)SNP_22720 | 384  | A | G | 7   | 3  | Young_pod | SNF2  |
| CakTC37609 | Ca(ICC2/PI489777)SNP_22721 | 268  | C | T | 3   | 4  | --        | --    |
|            | Ca(ICC2/PI489777)SNP_22722 | 348  | A | G | 3   | 7  | --        | --    |
|            | Ca(ICC2/PI489777)SNP_22723 | 840  | A | G | 13  | 12 | --        | --    |
|            | Ca(ICC2/PI489777)SNP_22724 | 927  | G | A | 14  | 8  | --        | --    |
| CakTC30278 | Ca(ICC2/PI489777)SNP_22725 | 747  | G | A | 7   | 5  | Root      | --    |
|            | Ca(ICC2/PI489777)SNP_22726 | 816  | A | G | 6   | 6  | Root      | --    |
|            | Ca(ICC2/PI489777)SNP_22727 | 855  | A | T | 7   | 6  | Root      | --    |
|            | Ca(ICC2/PI489777)SNP_22728 | 909  | A | T | 4   | 6  | Root      | --    |
|            | Ca(ICC2/PI489777)SNP_22729 | 1124 | C | G | 9   | 8  | Root      | --    |
|            | Ca(ICC2/PI489777)SNP_22730 | 1951 | A | G | 4   | 15 | Root      | --    |
|            | Ca(ICC2/PI489777)SNP_22731 | 2485 | C | T | 5   | 4  | Root      | --    |
| CakTC43169 | Ca(ICC2/PI489777)SNP_22732 | 755  | C | T | 5   | 8  | --        | --    |
| CakTC41508 | Ca(ICC2/PI489777)SNP_22733 | 1737 | G | A | 5   | 11 | --        | --    |
|            | Ca(ICC2/PI489777)SNP_22734 | 2233 | G | A | 8   | 26 | --        | --    |
|            | Ca(ICC2/PI489777)SNP_22735 | 2288 | A | G | 6   | 26 | --        | --    |
|            | Ca(ICC2/PI489777)SNP_22736 | 2314 | G | A | 6   | 17 | --        | --    |
|            | Ca(ICC2/PI489777)SNP_22737 | 2320 | T | A | 3   | 3  | --        | --    |
| CakTC41253 | Ca(ICC2/PI489777)SNP_22738 | 563  | C | T | 4   | 3  | --        | ARR-B |
|            | Ca(ICC2/PI489777)SNP_22739 | 938  | T | C | 9   | 4  | --        | ARR-B |
|            | Ca(ICC2/PI489777)SNP_22740 | 1059 | C | G | 10  | 4  | --        | ARR-B |
| CakTC18070 | Ca(ICC2/PI489777)SNP_22741 | 185  | A | G | 6   | 4  | --        | --    |
|            | Ca(ICC2/PI489777)SNP_22742 | 317  | G | C | 9   | 4  | --        | --    |
|            | Ca(ICC2/PI489777)SNP_22743 | 413  | G | A | 6   | 3  | --        | --    |
|            | Ca(ICC2/PI489777)SNP_22744 | 428  | C | T | 4   | 3  | --        | --    |
|            | Ca(ICC2/PI489777)SNP_22745 | 439  | G | T | 5   | 3  | --        | --    |
| CakTC38547 | Ca(ICC2/PI489777)SNP_22746 | 521  | A | T | 7   | 13 | --        | --    |
|            | Ca(ICC2/PI489777)SNP_22747 | 900  | A | G | 12  | 14 | --        | --    |
|            | Ca(ICC2/PI489777)SNP_22748 | 963  | T | G | 6   | 10 | --        | --    |
| CakTC28990 | Ca(ICC2/PI489777)SNP_22749 | 150  | C | T | 5   | 3  | Young_pod | --    |
|            | Ca(ICC2/PI489777)SNP_22750 | 190  | T | G | 5   | 3  | Young_pod | --    |
|            | Ca(ICC2/PI489777)SNP_22751 | 239  | C | G | 5   | 3  | Young_pod | --    |
|            | Ca(ICC2/PI489777)SNP_22752 | 616  | A | G | 4   | 5  | Young_pod | --    |
|            | Ca(ICC2/PI489777)SNP_22753 | 1039 | A | G | 15  | 3  | Young_pod | --    |
|            | Ca(ICC2/PI489777)SNP_22754 | 1138 | T | C | 11  | 4  | Young_pod | --    |
|            | Ca(ICC2/PI489777)SNP_22755 | 1363 | A | G | 8   | 4  | Young_pod | --    |
|            | Ca(ICC2/PI489777)SNP_22756 | 1531 | C | T | 3   | 3  | Young_pod | --    |
|            | Ca(ICC2/PI489777)SNP_22757 | 1970 | A | G | 9   | 3  | Young_pod | --    |
|            | Ca(ICC2/PI489777)SNP_22758 | 2316 | A | G | 8   | 5  | Young_pod | --    |
|            | Ca(ICC2/PI489777)SNP_22759 | 2516 | A | G | 3   | 5  | Young_pod | --    |
| CakTC28670 | Ca(ICC2/PI489777)SNP_22760 | 816  | C | T | 3   | 3  | --        | --    |
|            | Ca(ICC2/PI489777)SNP_22761 | 972  | T | C | 5   | 3  | --        | --    |
|            | Ca(ICC2/PI489777)SNP_22762 | 1030 | C | T | 4   | 3  | --        | --    |
|            | Ca(ICC2/PI489777)SNP_22763 | 1975 | C | T | 4   | 3  | --        | --    |
|            | Ca(ICC2/PI489777)SNP_22764 | 2255 | G | A | 3   | 4  | --        | --    |
| CakTC38502 | Ca(ICC2/PI489777)SNP_22765 | 76   | A | G | 3   | 7  | --        | --    |
|            | Ca(ICC2/PI489777)SNP_22766 | 634  | A | G | 26  | 18 | --        | --    |
|            | Ca(ICC2/PI489777)SNP_22767 | 850  | A | G | 28  | 18 | --        | --    |
|            | Ca(ICC2/PI489777)SNP_22768 | 996  | G | T | 18  | 13 | --        | --    |
| CakTC41523 | Ca(ICC2/PI489777)SNP_22769 | 1460 | C | T | 6   | 3  | --        | --    |
|            | Ca(ICC2/PI489777)SNP_22770 | 1766 | C | T | 15  | 5  | --        | --    |
|            | Ca(ICC2/PI489777)SNP_22771 | 2260 | A | G | 4   | 4  | --        | --    |
| CakTC34486 | Ca(ICC2/PI489777)SNP_22772 | 763  | T | C | 8   | 3  | --        | --    |
| CakTC42780 | Ca(ICC2/PI489777)SNP_22773 | 87   | A | T | 4   | 11 | --        | --    |
|            | Ca(ICC2/PI489777)SNP_22774 | 97   | T | A | 4   | 12 | --        | --    |
|            | Ca(ICC2/PI489777)SNP_22775 | 188  | T | A | 10  | 24 | --        | --    |
|            | Ca(ICC2/PI489777)SNP_22776 | 349  | T | C | 9   | 29 | --        | --    |
|            | Ca(ICC2/PI489777)SNP_22777 | 728  | A | C | 10  | 32 | --        | --    |
|            | Ca(ICC2/PI489777)SNP_22778 | 1142 | G | A | 14  | 31 | --        | --    |
|            | Ca(ICC2/PI489777)SNP_22779 | 1190 | A | G | 15  | 35 | --        | --    |
|            | Ca(ICC2/PI489777)SNP_22780 | 1598 | T | A | 14  | 13 | --        | --    |
| CakTC20158 | Ca(ICC2/PI489777)SNP_22781 | 233  | C | G | 13  | 5  | --        | --    |
|            | Ca(ICC2/PI489777)SNP_22782 | 578  | A | G | 10  | 6  | --        | --    |
| CakTC42852 | Ca(ICC2/PI489777)SNP_22783 | 995  | G | A | 5   | 3  | Flower    | bud   |
| CakTC27525 | Ca(ICC2/PI489777)SNP_22784 | 131  | G | C | 40  | 6  | --        | --    |
|            | Ca(ICC2/PI489777)SNP_22785 | 284  | G | T | 71  | 14 | --        | --    |
|            | Ca(ICC2/PI489777)SNP_22786 | 314  | A | C | 70  | 18 | --        | --    |
|            | Ca(ICC2/PI489777)SNP_22787 | 390  | G | C | 103 | 29 | --        | --    |

|            |                            |      |   |   |    |    |        |      |
|------------|----------------------------|------|---|---|----|----|--------|------|
|            | Ca(ICC2/PI489777)SNP_22788 | 486  | T | C | 99 | 32 | --     | --   |
|            | Ca(ICC2/PI489777)SNP_22789 | 1095 | C | T | 94 | 13 | --     | --   |
|            | Ca(ICC2/PI489777)SNP_22790 | 1566 | T | C | 52 | 6  | --     | --   |
| CakTC39673 | Ca(ICC2/PI489777)SNP_22791 | 85   | G | C | 41 | 6  | --     | C2H2 |
|            | Ca(ICC2/PI489777)SNP_22792 | 208  | C | A | 49 | 7  | --     | C2H2 |
|            | Ca(ICC2/PI489777)SNP_22793 | 272  | A | C | 44 | 7  | --     | C2H2 |
|            | Ca(ICC2/PI489777)SNP_22794 | 434  | G | A | 40 | 8  | --     | C2H2 |
|            | Ca(ICC2/PI489777)SNP_22795 | 887  | C | T | 51 | 11 | --     | C2H2 |
|            | Ca(ICC2/PI489777)SNP_22796 | 903  | T | C | 52 | 11 | --     | C2H2 |
|            | Ca(ICC2/PI489777)SNP_22797 | 957  | A | C | 54 | 9  | --     | C2H2 |
|            | Ca(ICC2/PI489777)SNP_22798 | 3399 | C | T | 8  | 3  | --     | C2H2 |
| CakTC42647 | Ca(ICC2/PI489777)SNP_22799 | 729  | T | C | 8  | 3  | --     | --   |
|            | Ca(ICC2/PI489777)SNP_22800 | 777  | T | A | 10 | 3  | --     | --   |
|            | Ca(ICC2/PI489777)SNP_22801 | 939  | G | T | 7  | 6  | --     | --   |
|            | Ca(ICC2/PI489777)SNP_22802 | 945  | C | T | 7  | 5  | --     | --   |
|            | Ca(ICC2/PI489777)SNP_22803 | 1020 | G | T | 7  | 3  | --     | --   |
|            | Ca(ICC2/PI489777)SNP_22804 | 1080 | A | G | 11 | 9  | --     | --   |
|            | Ca(ICC2/PI489777)SNP_22805 | 1089 | G | A | 11 | 9  | --     | --   |
|            | Ca(ICC2/PI489777)SNP_22806 | 1244 | T | C | 9  | 8  | --     | --   |
|            | Ca(ICC2/PI489777)SNP_22807 | 1662 | T | G | 6  | 8  | --     | --   |
|            | Ca(ICC2/PI489777)SNP_22808 | 1789 | G | A | 6  | 5  | --     | --   |
| CakTC29574 | Ca(ICC2/PI489777)SNP_22809 | 679  | A | T | 6  | 8  | --     | --   |
|            | Ca(ICC2/PI489777)SNP_22810 | 703  | T | C | 6  | 7  | --     | --   |
| CakTC26782 | Ca(ICC2/PI489777)SNP_22811 | 245  | A | G | 4  | 3  | --     | --   |
|            | Ca(ICC2/PI489777)SNP_22812 | 278  | A | G | 4  | 3  | --     | --   |
|            | Ca(ICC2/PI489777)SNP_22813 | 358  | C | T | 3  | 3  | --     | --   |
|            | Ca(ICC2/PI489777)SNP_22814 | 427  | T | C | 3  | 4  | --     | --   |
| CakTC38138 | Ca(ICC2/PI489777)SNP_22815 | 23   | A | G | 10 | 7  | Shoot  | --   |
|            | Ca(ICC2/PI489777)SNP_22816 | 260  | T | C | 18 | 17 | Shoot  | --   |
|            | Ca(ICC2/PI489777)SNP_22817 | 413  | A | G | 21 | 18 | Shoot  | --   |
|            | Ca(ICC2/PI489777)SNP_22818 | 939  | A | G | 6  | 3  | Shoot  | --   |
| CakTC27890 | Ca(ICC2/PI489777)SNP_22819 | 376  | C | G | 24 | 20 | --     | --   |
|            | Ca(ICC2/PI489777)SNP_22820 | 453  | T | C | 32 | 27 | --     | --   |
|            | Ca(ICC2/PI489777)SNP_22821 | 1105 | G | A | 25 | 14 | --     | --   |
|            | Ca(ICC2/PI489777)SNP_22822 | 1268 | T | C | 32 | 11 | --     | --   |
|            | Ca(ICC2/PI489777)SNP_22823 | 1336 | G | T | 22 | 9  | --     | --   |
| CakTC30515 | Ca(ICC2/PI489777)SNP_22824 | 1284 | C | T | 3  | 3  | --     | --   |
|            | Ca(ICC2/PI489777)SNP_22825 | 1290 | C | T | 3  | 3  | --     | --   |
|            | Ca(ICC2/PI489777)SNP_22826 | 1365 | A | C | 4  | 3  | --     | --   |
| CakTC30623 | Ca(ICC2/PI489777)SNP_22827 | 681  | A | T | 14 | 11 | --     | --   |
|            | Ca(ICC2/PI489777)SNP_22828 | 927  | T | G | 9  | 5  | --     | --   |
| CakTC26081 | Ca(ICC2/PI489777)SNP_22829 | 469  | G | T | 37 | 13 | --     | --   |
|            | Ca(ICC2/PI489777)SNP_22830 | 2126 | C | T | 47 | 22 | --     | --   |
|            | Ca(ICC2/PI489777)SNP_22831 | 2226 | G | A | 45 | 27 | --     | --   |
| CakTC24534 | Ca(ICC2/PI489777)SNP_22832 | 760  | C | G | 5  | 6  | Flower | bud  |
|            | Ca(ICC2/PI489777)SNP_22833 | 833  | A | G | 5  | 5  | Flower | bud  |
|            | Ca(ICC2/PI489777)SNP_22834 | 836  | C | G | 5  | 4  | Flower | bud  |
|            | Ca(ICC2/PI489777)SNP_22835 | 854  | G | T | 5  | 5  | Flower | bud  |
|            | Ca(ICC2/PI489777)SNP_22836 | 867  | G | A | 5  | 5  | Flower | bud  |
|            | Ca(ICC2/PI489777)SNP_22837 | 922  | A | G | 4  | 4  | Flower | bud  |
| CakTC27123 | Ca(ICC2/PI489777)SNP_22838 | 167  | T | C | 56 | 24 | --     | --   |
| CakTC37320 | Ca(ICC2/PI489777)SNP_22839 | 224  | G | T | 45 | 26 | --     | --   |
|            | Ca(ICC2/PI489777)SNP_22840 | 574  | G | A | 32 | 35 | --     | --   |
|            | Ca(ICC2/PI489777)SNP_22841 | 600  | T | C | 28 | 33 | --     | --   |
|            | Ca(ICC2/PI489777)SNP_22842 | 831  | C | T | 47 | 27 | --     | --   |
|            | Ca(ICC2/PI489777)SNP_22843 | 1020 | A | C | 34 | 11 | --     | --   |
|            | Ca(ICC2/PI489777)SNP_22844 | 1098 | G | T | 22 | 5  | --     | --   |
| CakTC25296 | Ca(ICC2/PI489777)SNP_22845 | 897  | A | G | 20 | 33 | --     | --   |
| CakTC42349 | Ca(ICC2/PI489777)SNP_22846 | 437  | T | C | 4  | 3  | --     | bZIP |
|            | Ca(ICC2/PI489777)SNP_22847 | 860  | T | C | 9  | 7  | --     | bZIP |
|            | Ca(ICC2/PI489777)SNP_22848 | 1406 | G | A | 8  | 7  | --     | bZIP |
|            | Ca(ICC2/PI489777)SNP_22849 | 1497 | G | T | 6  | 7  | --     | bZIP |
| CakTC40149 | Ca(ICC2/PI489777)SNP_22850 | 377  | C | G | 13 | 6  | --     | --   |
|            | Ca(ICC2/PI489777)SNP_22851 | 697  | T | G | 10 | 9  | --     | --   |
|            | Ca(ICC2/PI489777)SNP_22852 | 959  | T | G | 8  | 8  | --     | --   |
| CakTC34720 | Ca(ICC2/PI489777)SNP_22853 | 205  | T | G | 6  | 15 | --     | --   |
|            | Ca(ICC2/PI489777)SNP_22854 | 220  | C | A | 9  | 14 | --     | --   |
|            | Ca(ICC2/PI489777)SNP_22855 | 263  | T | C | 9  | 13 | --     | --   |
|            | Ca(ICC2/PI489777)SNP_22856 | 600  | T | C | 12 | 11 | --     | --   |
|            | Ca(ICC2/PI489777)SNP_22857 | 718  | T | G | 12 | 11 | --     | --   |
|            | Ca(ICC2/PI489777)SNP_22858 | 897  | T | G | 18 | 9  | --     | --   |
|            | Ca(ICC2/PI489777)SNP_22859 | 1077 | T | C | 21 | 11 | --     | --   |
|            | Ca(ICC2/PI489777)SNP_22860 | 1261 | G | C | 31 | 14 | --     | --   |
|            | Ca(ICC2/PI489777)SNP_22861 | 1869 | A | G | 24 | 6  | --     | --   |

|            |                            |      |   |   |    |    |    |    |
|------------|----------------------------|------|---|---|----|----|----|----|
|            | Ca(ICC2/PI489777)SNP_22862 | 1986 | T | C | 25 | 11 | -- | -- |
|            | Ca(ICC2/PI489777)SNP_22863 | 2253 | A | C | 10 | 6  | -- | -- |
|            | Ca(ICC2/PI489777)SNP_22864 | 2739 | T | C | 24 | 17 | -- | -- |
|            | Ca(ICC2/PI489777)SNP_22865 | 2907 | C | T | 28 | 20 | -- | -- |
|            | Ca(ICC2/PI489777)SNP_22866 | 3355 | A | G | 14 | 10 | -- | -- |
|            | Ca(ICC2/PI489777)SNP_22867 | 3426 | A | T | 14 | 8  | -- | -- |
| CakTC41564 | Ca(ICC2/PI489777)SNP_22868 | 547  | G | A | 5  | 22 | -- | -- |
| CakTC42580 | Ca(ICC2/PI489777)SNP_22869 | 253  | G | T | 3  | 4  | -- | -- |
|            | Ca(ICC2/PI489777)SNP_22870 | 352  | A | G | 8  | 6  | -- | -- |
|            | Ca(ICC2/PI489777)SNP_22871 | 387  | C | T | 8  | 6  | -- | -- |
|            | Ca(ICC2/PI489777)SNP_22872 | 400  | T | G | 7  | 6  | -- | -- |
|            | Ca(ICC2/PI489777)SNP_22873 | 927  | C | A | 12 | 4  | -- | -- |
|            | Ca(ICC2/PI489777)SNP_22874 | 1031 | T | C | 10 | 3  | -- | -- |
| CakTC24934 | Ca(ICC2/PI489777)SNP_22875 | 342  | C | T | 5  | 3  | -- | -- |
|            | Ca(ICC2/PI489777)SNP_22876 | 359  | C | T | 4  | 3  | -- | -- |
|            | Ca(ICC2/PI489777)SNP_22877 | 392  | C | A | 4  | 3  | -- | -- |
|            | Ca(ICC2/PI489777)SNP_22878 | 401  | A | G | 5  | 3  | -- | -- |
|            | Ca(ICC2/PI489777)SNP_22879 | 652  | A | G | 4  | 3  | -- | -- |
| CakTC38955 | Ca(ICC2/PI489777)SNP_22880 | 200  | A | G | 11 | 11 | -- | -- |
|            | Ca(ICC2/PI489777)SNP_22881 | 638  | G | A | 71 | 56 | -- | -- |
| CakTC25178 | Ca(ICC2/PI489777)SNP_22882 | 143  | C | T | 15 | 5  | -- | -- |
|            | Ca(ICC2/PI489777)SNP_22883 | 350  | A | C | 33 | 8  | -- | -- |
|            | Ca(ICC2/PI489777)SNP_22884 | 378  | G | A | 34 | 15 | -- | -- |
| CakTC27093 | Ca(ICC2/PI489777)SNP_22885 | 1049 | C | T | 8  | 4  | -- | -- |
|            | Ca(ICC2/PI489777)SNP_22886 | 1222 | A | G | 10 | 7  | -- | -- |
|            | Ca(ICC2/PI489777)SNP_22887 | 1458 | C | T | 11 | 10 | -- | -- |
|            | Ca(ICC2/PI489777)SNP_22888 | 2245 | A | G | 13 | 9  | -- | -- |
|            | Ca(ICC2/PI489777)SNP_22889 | 2306 | C | T | 13 | 10 | -- | -- |
|            | Ca(ICC2/PI489777)SNP_22890 | 2391 | A | G | 10 | 9  | -- | -- |
|            | Ca(ICC2/PI489777)SNP_22891 | 2404 | T | C | 13 | 9  | -- | -- |
|            | Ca(ICC2/PI489777)SNP_22892 | 2623 | A | C | 11 | 12 | -- | -- |
|            | Ca(ICC2/PI489777)SNP_22893 | 3313 | C | T | 19 | 4  | -- | -- |
|            | Ca(ICC2/PI489777)SNP_22894 | 3661 | G | T | 14 | 8  | -- | -- |
|            | Ca(ICC2/PI489777)SNP_22895 | 3662 | C | A | 14 | 8  | -- | -- |
| CakTC29202 | Ca(ICC2/PI489777)SNP_22896 | 2557 | G | T | 5  | 4  | -- | -- |
|            | Ca(ICC2/PI489777)SNP_22897 | 3100 | G | C | 3  | 3  | -- | -- |
| CakTC37613 | Ca(ICC2/PI489777)SNP_22898 | 1011 | C | T | 25 | 24 | -- | -- |
|            | Ca(ICC2/PI489777)SNP_22899 | 1109 | G | A | 21 | 19 | -- | -- |
| CakTC30076 | Ca(ICC2/PI489777)SNP_22900 | 547  | G | T | 7  | 3  | -- | -- |
| CakTC24682 | Ca(ICC2/PI489777)SNP_22901 | 268  | G | A | 3  | 5  | -- | -- |
|            | Ca(ICC2/PI489777)SNP_22902 | 370  | G | A | 3  | 6  | -- | -- |
|            | Ca(ICC2/PI489777)SNP_22903 | 385  | G | A | 4  | 6  | -- | -- |
|            | Ca(ICC2/PI489777)SNP_22904 | 502  | G | T | 5  | 8  | -- | -- |
|            | Ca(ICC2/PI489777)SNP_22905 | 573  | T | A | 3  | 10 | -- | -- |
|            | Ca(ICC2/PI489777)SNP_22906 | 901  | G | A | 5  | 9  | -- | -- |
| CakTC34650 | Ca(ICC2/PI489777)SNP_22907 | 64   | A | C | 11 | 15 | -- | -- |
|            | Ca(ICC2/PI489777)SNP_22908 | 516  | T | C | 3  | 8  | -- | -- |
|            | Ca(ICC2/PI489777)SNP_22909 | 542  | G | T | 3  | 3  | -- | -- |
| CakTC25374 | Ca(ICC2/PI489777)SNP_22910 | 62   | A | C | 9  | 3  | -- | -- |
|            | Ca(ICC2/PI489777)SNP_22911 | 77   | A | C | 8  | 4  | -- | -- |
|            | Ca(ICC2/PI489777)SNP_22912 | 603  | A | G | 17 | 3  | -- | -- |
|            | Ca(ICC2/PI489777)SNP_22913 | 809  | C | A | 16 | 4  | -- | -- |
|            | Ca(ICC2/PI489777)SNP_22914 | 814  | C | T | 13 | 4  | -- | -- |
|            | Ca(ICC2/PI489777)SNP_22915 | 858  | C | T | 16 | 3  | -- | -- |
|            | Ca(ICC2/PI489777)SNP_22916 | 884  | C | T | 11 | 8  | -- | -- |
|            | Ca(ICC2/PI489777)SNP_22917 | 1274 | T | G | 9  | 7  | -- | -- |
|            | Ca(ICC2/PI489777)SNP_22918 | 1427 | A | G | 11 | 5  | -- | -- |
|            | Ca(ICC2/PI489777)SNP_22919 | 1436 | G | T | 13 | 6  | -- | -- |
|            | Ca(ICC2/PI489777)SNP_22920 | 2499 | G | A | 7  | 5  | -- | -- |
|            | Ca(ICC2/PI489777)SNP_22921 | 2524 | T | G | 8  | 5  | -- | -- |
| CakTC40286 | Ca(ICC2/PI489777)SNP_22922 | 695  | T | G | 3  | 3  | -- | -- |
|            | Ca(ICC2/PI489777)SNP_22923 | 696  | C | T | 3  | 3  | -- | -- |
| CakTC09154 | Ca(ICC2/PI489777)SNP_22924 | 334  | T | A | 3  | 3  | -- | -- |
| CakTC42068 | Ca(ICC2/PI489777)SNP_22925 | 158  | T | G | 13 | 21 | -- | -- |
|            | Ca(ICC2/PI489777)SNP_22926 | 651  | T | C | 22 | 23 | -- | -- |
| CakTC32656 | Ca(ICC2/PI489777)SNP_22927 | 1180 | G | A | 12 | 23 | -- | -- |
|            | Ca(ICC2/PI489777)SNP_22928 | 1275 | G | C | 10 | 22 | -- | -- |
|            | Ca(ICC2/PI489777)SNP_22929 | 1546 | T | C | 20 | 8  | -- | -- |
|            | Ca(ICC2/PI489777)SNP_22930 | 1888 | A | T | 28 | 11 | -- | -- |
|            | Ca(ICC2/PI489777)SNP_22931 | 1895 | T | G | 26 | 8  | -- | -- |
| CakTC41287 | Ca(ICC2/PI489777)SNP_22932 | 946  | C | T | 5  | 3  | -- | -- |
| CakTC36985 | Ca(ICC2/PI489777)SNP_22933 | 1160 | C | G | 13 | 7  | -- | -- |
|            | Ca(ICC2/PI489777)SNP_22934 | 1690 | A | C | 34 | 10 | -- | -- |
|            | Ca(ICC2/PI489777)SNP_22935 | 2222 | C | T | 33 | 14 | -- | -- |

|            |                            |      |   |   |     |     |    |       |
|------------|----------------------------|------|---|---|-----|-----|----|-------|
|            | Ca(ICC2/PI489777)SNP_22936 | 2255 | G | A | 33  | 13  | -- | --    |
|            | Ca(ICC2/PI489777)SNP_22937 | 2310 | A | G | 18  | 9   | -- | --    |
|            | Ca(ICC2/PI489777)SNP_22938 | 2383 | G | A | 22  | 9   | -- | --    |
| CakTC34036 | Ca(ICC2/PI489777)SNP_22939 | 205  | T | G | 4   | 5   | -- | --    |
| CakTC40302 | Ca(ICC2/PI489777)SNP_22940 | 305  | T | C | 10  | 4   | -- | --    |
|            | Ca(ICC2/PI489777)SNP_22941 | 399  | A | T | 10  | 5   | -- | --    |
|            | Ca(ICC2/PI489777)SNP_22942 | 1616 | A | G | 8   | 5   | -- | --    |
|            | Ca(ICC2/PI489777)SNP_22943 | 1754 | C | G | 8   | 4   | -- | --    |
| CakTC38560 | Ca(ICC2/PI489777)SNP_22944 | 529  | A | T | 10  | 5   | -- | TRAF  |
|            | Ca(ICC2/PI489777)SNP_22945 | 628  | T | C | 7   | 7   | -- | TRAF  |
|            | Ca(ICC2/PI489777)SNP_22946 | 896  | A | G | 3   | 4   | -- | TRAF  |
| CakTC24036 | Ca(ICC2/PI489777)SNP_22947 | 116  | A | G | 65  | 190 | -- | --    |
|            | Ca(ICC2/PI489777)SNP_22948 | 160  | A | G | 66  | 207 | -- | --    |
|            | Ca(ICC2/PI489777)SNP_22949 | 310  | G | A | 97  | 262 | -- | --    |
|            | Ca(ICC2/PI489777)SNP_22950 | 844  | C | T | 42  | 6   | -- | --    |
| CakTC14163 | Ca(ICC2/PI489777)SNP_22951 | 320  | C | T | 24  | 8   | -- | --    |
| CakTC42370 | Ca(ICC2/PI489777)SNP_22952 | 136  | G | A | 14  | 3   | -- | --    |
|            | Ca(ICC2/PI489777)SNP_22953 | 220  | T | C | 35  | 6   | -- | --    |
|            | Ca(ICC2/PI489777)SNP_22954 | 271  | A | G | 39  | 7   | -- | --    |
|            | Ca(ICC2/PI489777)SNP_22955 | 289  | C | T | 40  | 6   | -- | --    |
|            | Ca(ICC2/PI489777)SNP_22956 | 313  | A | G | 39  | 13  | -- | --    |
|            | Ca(ICC2/PI489777)SNP_22957 | 382  | G | A | 36  | 11  | -- | --    |
|            | Ca(ICC2/PI489777)SNP_22958 | 424  | T | C | 35  | 12  | -- | --    |
|            | Ca(ICC2/PI489777)SNP_22959 | 1606 | G | A | 38  | 19  | -- | --    |
|            | Ca(ICC2/PI489777)SNP_22960 | 1708 | G | A | 30  | 16  | -- | --    |
|            | Ca(ICC2/PI489777)SNP_22961 | 1721 | A | T | 23  | 11  | -- | --    |
| CakTC38987 | Ca(ICC2/PI489777)SNP_22962 | 1118 | A | C | 3   | 5   | -- | bHLH  |
|            | Ca(ICC2/PI489777)SNP_22963 | 1284 | T | C | 3   | 4   | -- | bHLH  |
| CakTC26870 | Ca(ICC2/PI489777)SNP_22964 | 665  | A | C | 5   | 3   | -- | --    |
| CakTC28548 | Ca(ICC2/PI489777)SNP_22965 | 679  | A | G | 7   | 10  | -- | --    |
| CakTC41148 | Ca(ICC2/PI489777)SNP_22966 | 122  | T | A | 12  | 14  | -- | --    |
|            | Ca(ICC2/PI489777)SNP_22967 | 379  | A | T | 98  | 56  | -- | --    |
|            | Ca(ICC2/PI489777)SNP_22968 | 524  | G | A | 112 | 53  | -- | --    |
|            | Ca(ICC2/PI489777)SNP_22969 | 614  | G | A | 92  | 46  | -- | --    |
| CakTC34312 | Ca(ICC2/PI489777)SNP_22970 | 2805 | T | C | 18  | 18  | -- | --    |
|            | Ca(ICC2/PI489777)SNP_22971 | 3286 | T | C | 10  | 18  | -- | --    |
|            | Ca(ICC2/PI489777)SNP_22972 | 4639 | C | T | 5   | 6   | -- | --    |
|            | Ca(ICC2/PI489777)SNP_22973 | 5362 | A | T | 10  | 13  | -- | --    |
|            | Ca(ICC2/PI489777)SNP_22974 | 5455 | G | A | 10  | 7   | -- | --    |
|            | Ca(ICC2/PI489777)SNP_22975 | 5672 | T | G | 15  | 13  | -- | --    |
| CakTC42313 | Ca(ICC2/PI489777)SNP_22976 | 244  | A | G | 29  | 10  | -- | TPR   |
|            | Ca(ICC2/PI489777)SNP_22977 | 273  | C | G | 30  | 10  | -- | TPR   |
|            | Ca(ICC2/PI489777)SNP_22978 | 504  | T | C | 15  | 7   | -- | TPR   |
|            | Ca(ICC2/PI489777)SNP_22979 | 588  | A | C | 16  | 8   | -- | TPR   |
|            | Ca(ICC2/PI489777)SNP_22980 | 618  | G | A | 17  | 9   | -- | TPR   |
|            | Ca(ICC2/PI489777)SNP_22981 | 924  | G | A | 23  | 17  | -- | TPR   |
|            | Ca(ICC2/PI489777)SNP_22982 | 1468 | G | A | 36  | 13  | -- | TPR   |
| CakTC40277 | Ca(ICC2/PI489777)SNP_22983 | 105  | T | C | 13  | 7   | -- | --    |
| CakTC37188 | Ca(ICC2/PI489777)SNP_22984 | 108  | C | A | 11  | 5   | -- | --    |
|            | Ca(ICC2/PI489777)SNP_22985 | 170  | G | A | 12  | 5   | -- | --    |
|            | Ca(ICC2/PI489777)SNP_22986 | 207  | A | C | 13  | 5   | -- | --    |
|            | Ca(ICC2/PI489777)SNP_22987 | 446  | C | A | 9   | 4   | -- | --    |
| CakTC33364 | Ca(ICC2/PI489777)SNP_22988 | 1035 | G | T | 6   | 19  | -- | --    |
|            | Ca(ICC2/PI489777)SNP_22989 | 1991 | G | C | 10  | 3   | -- | --    |
|            | Ca(ICC2/PI489777)SNP_22990 | 2022 | T | G | 10  | 3   | -- | --    |
| CakTC38295 | Ca(ICC2/PI489777)SNP_22991 | 170  | C | G | 9   | 8   | -- | CCAAT |
|            | Ca(ICC2/PI489777)SNP_22992 | 266  | T | C | 8   | 9   | -- | CCAAT |
|            | Ca(ICC2/PI489777)SNP_22993 | 1120 | C | T | 23  | 18  | -- | CCAAT |
| CakTC43196 | Ca(ICC2/PI489777)SNP_22994 | 365  | A | G | 38  | 78  | -- | --    |
|            | Ca(ICC2/PI489777)SNP_22995 | 378  | T | C | 45  | 84  | -- | --    |
|            | Ca(ICC2/PI489777)SNP_22996 | 467  | G | A | 40  | 72  | -- | --    |
|            | Ca(ICC2/PI489777)SNP_22997 | 485  | C | A | 41  | 81  | -- | --    |
|            | Ca(ICC2/PI489777)SNP_22998 | 569  | A | T | 31  | 67  | -- | --    |
| CakTC24860 | Ca(ICC2/PI489777)SNP_22999 | 457  | T | C | 19  | 3   | -- | TUB   |
|            | Ca(ICC2/PI489777)SNP_23000 | 954  | T | G | 12  | 3   | -- | TUB   |
| CakTC24334 | Ca(ICC2/PI489777)SNP_23001 | 1505 | A | G | 11  | 3   | -- | --    |
| CakTC27937 | Ca(ICC2/PI489777)SNP_23002 | 2150 | T | G | 8   | 5   | -- | --    |
|            | Ca(ICC2/PI489777)SNP_23003 | 2256 | T | C | 6   | 11  | -- | --    |
| CakTC35862 | Ca(ICC2/PI489777)SNP_23004 | 711  | G | A | 10  | 6   | -- | --    |
|            | Ca(ICC2/PI489777)SNP_23005 | 906  | A | G | 8   | 4   | -- | --    |
|            | Ca(ICC2/PI489777)SNP_23006 | 1053 | A | G | 12  | 5   | -- | --    |
|            | Ca(ICC2/PI489777)SNP_23007 | 1806 | C | T | 14  | 12  | -- | --    |
|            | Ca(ICC2/PI489777)SNP_23008 | 1959 | G | A | 12  | 9   | -- | --    |
|            | Ca(ICC2/PI489777)SNP_23009 | 2532 | T | C | 7   | 3   | -- | --    |

|            |                            |      |   |   |    |     |        |     |
|------------|----------------------------|------|---|---|----|-----|--------|-----|
| CakTC08485 | Ca(ICC2/PI489777)SNP_23010 | 526  | C | G | 4  | 6   | --     | --  |
| CakTC10979 | Ca(ICC2/PI489777)SNP_23011 | 335  | T | C | 8  | 3   | --     | --  |
|            | Ca(ICC2/PI489777)SNP_23012 | 766  | C | T | 9  | 7   | --     | --  |
|            | Ca(ICC2/PI489777)SNP_23013 | 862  | G | T | 6  | 8   | --     | --  |
|            | Ca(ICC2/PI489777)SNP_23014 | 1159 | A | G | 11 | 7   | --     | --  |
|            | Ca(ICC2/PI489777)SNP_23015 | 1321 | T | G | 25 | 10  | --     | --  |
|            | Ca(ICC2/PI489777)SNP_23016 | 1648 | A | T | 32 | 12  | --     | --  |
|            | Ca(ICC2/PI489777)SNP_23017 | 2014 | C | T | 10 | 7   | --     | --  |
|            | Ca(ICC2/PI489777)SNP_23018 | 2092 | T | C | 9  | 8   | --     | --  |
|            | Ca(ICC2/PI489777)SNP_23019 | 2206 | T | C | 11 | 7   | --     | --  |
| CakTC34735 | Ca(ICC2/PI489777)SNP_23020 | 263  | C | G | 5  | 3   | --     | --  |
|            | Ca(ICC2/PI489777)SNP_23021 | 405  | G | C | 4  | 3   | --     | --  |
|            | Ca(ICC2/PI489777)SNP_23022 | 455  | A | G | 4  | 3   | --     | --  |
| CakTC11473 | Ca(ICC2/PI489777)SNP_23023 | 856  | T | G | 15 | 10  | --     | --  |
|            | Ca(ICC2/PI489777)SNP_23024 | 1271 | G | T | 9  | 7   | --     | --  |
|            | Ca(ICC2/PI489777)SNP_23025 | 1310 | C | T | 6  | 6   | --     | --  |
| CakTC29811 | Ca(ICC2/PI489777)SNP_23026 | 340  | A | G | 4  | 4   | --     | --  |
|            | Ca(ICC2/PI489777)SNP_23027 | 387  | T | A | 3  | 5   | --     | --  |
| CakTC26427 | Ca(ICC2/PI489777)SNP_23028 | 514  | T | C | 21 | 14  | --     | --  |
|            | Ca(ICC2/PI489777)SNP_23029 | 642  | G | A | 25 | 15  | --     | --  |
|            | Ca(ICC2/PI489777)SNP_23030 | 1807 | T | C | 5  | 7   | --     | --  |
|            | Ca(ICC2/PI489777)SNP_23031 | 2053 | A | T | 12 | 10  | --     | --  |
|            | Ca(ICC2/PI489777)SNP_23032 | 2752 | T | C | 5  | 4   | --     | --  |
| CakTC08442 | Ca(ICC2/PI489777)SNP_23033 | 508  | G | C | 9  | 3   | --     | --  |
|            | Ca(ICC2/PI489777)SNP_23034 | 684  | C | G | 9  | 3   | --     | --  |
| CakTC39518 | Ca(ICC2/PI489777)SNP_23035 | 642  | G | A | 61 | 69  | --     | --  |
|            | Ca(ICC2/PI489777)SNP_23036 | 795  | G | A | 83 | 108 | --     | --  |
| CakTC38598 | Ca(ICC2/PI489777)SNP_23037 | 109  | T | C | 16 | 6   | --     | --  |
|            | Ca(ICC2/PI489777)SNP_23038 | 424  | A | G | 21 | 13  | --     | --  |
| CakTC37907 | Ca(ICC2/PI489777)SNP_23039 | 574  | T | A | 4  | 4   | Flower | bud |
| CakTC05477 | Ca(ICC2/PI489777)SNP_23040 | 443  | T | G | 6  | 6   | --     | SET |
|            | Ca(ICC2/PI489777)SNP_23041 | 488  | C | T | 6  | 7   | --     | SET |
|            | Ca(ICC2/PI489777)SNP_23042 | 872  | C | T | 3  | 3   | --     | SET |
| CakTC10065 | Ca(ICC2/PI489777)SNP_23043 | 223  | A | G | 5  | 3   | --     | --  |
|            | Ca(ICC2/PI489777)SNP_23044 | 357  | T | C | 7  | 3   | --     | --  |
|            | Ca(ICC2/PI489777)SNP_23045 | 453  | T | A | 10 | 3   | --     | --  |
|            | Ca(ICC2/PI489777)SNP_23046 | 807  | T | C | 8  | 10  | --     | --  |
|            | Ca(ICC2/PI489777)SNP_23047 | 972  | G | A | 5  | 6   | --     | --  |
| CakTC39316 | Ca(ICC2/PI489777)SNP_23048 | 470  | G | A | 52 | 59  | --     | --  |
|            | Ca(ICC2/PI489777)SNP_23049 | 686  | A | G | 69 | 67  | --     | --  |
|            | Ca(ICC2/PI489777)SNP_23050 | 800  | A | C | 55 | 55  | --     | --  |
|            | Ca(ICC2/PI489777)SNP_23051 | 893  | A | G | 52 | 42  | --     | --  |
|            | Ca(ICC2/PI489777)SNP_23052 | 908  | G | A | 47 | 47  | --     | --  |
|            | Ca(ICC2/PI489777)SNP_23053 | 959  | G | A | 59 | 59  | --     | --  |
|            | Ca(ICC2/PI489777)SNP_23054 | 1031 | C | T | 71 | 60  | --     | --  |
|            | Ca(ICC2/PI489777)SNP_23055 | 1351 | G | A | 44 | 33  | --     | --  |
| CakTC29891 | Ca(ICC2/PI489777)SNP_23056 | 1252 | A | G | 23 | 14  | Flower | bud |
|            | Ca(ICC2/PI489777)SNP_23057 | 2252 | T | G | 21 | 11  | Flower | bud |
|            | Ca(ICC2/PI489777)SNP_23058 | 2423 | A | C | 34 | 21  | Flower | bud |
|            | Ca(ICC2/PI489777)SNP_23059 | 2521 | C | G | 38 | 23  | Flower | bud |
|            | Ca(ICC2/PI489777)SNP_23060 | 3253 | A | G | 40 | 15  | Flower | bud |
|            | Ca(ICC2/PI489777)SNP_23061 | 3715 | C | T | 20 | 8   | Flower | bud |
|            | Ca(ICC2/PI489777)SNP_23062 | 3765 | G | A | 20 | 9   | Flower | bud |
|            | Ca(ICC2/PI489777)SNP_23063 | 4167 | A | C | 8  | 3   | Flower | bud |
| CakTC37647 | Ca(ICC2/PI489777)SNP_23064 | 810  | A | G | 11 | 3   | --     | --  |
|            | Ca(ICC2/PI489777)SNP_23065 | 852  | G | C | 14 | 3   | --     | --  |
|            | Ca(ICC2/PI489777)SNP_23066 | 866  | T | C | 14 | 4   | --     | --  |
|            | Ca(ICC2/PI489777)SNP_23067 | 878  | G | C | 15 | 3   | --     | --  |
|            | Ca(ICC2/PI489777)SNP_23068 | 889  | T | A | 15 | 3   | --     | --  |
|            | Ca(ICC2/PI489777)SNP_23069 | 899  | G | C | 15 | 3   | --     | --  |
| CakTC38409 | Ca(ICC2/PI489777)SNP_23070 | 222  | T | A | 16 | 16  | --     | --  |
|            | Ca(ICC2/PI489777)SNP_23071 | 814  | G | A | 30 | 21  | --     | --  |
|            | Ca(ICC2/PI489777)SNP_23072 | 841  | G | C | 37 | 31  | --     | --  |
|            | Ca(ICC2/PI489777)SNP_23073 | 1417 | A | G | 23 | 17  | --     | --  |
| CakTC35648 | Ca(ICC2/PI489777)SNP_23074 | 2059 | G | T | 9  | 4   | --     | --  |
| CakTC28839 | Ca(ICC2/PI489777)SNP_23075 | 609  | C | T | 5  | 5   | --     | --  |
|            | Ca(ICC2/PI489777)SNP_23076 | 642  | T | C | 4  | 5   | --     | --  |
|            | Ca(ICC2/PI489777)SNP_23077 | 723  | A | G | 4  | 6   | --     | --  |
|            | Ca(ICC2/PI489777)SNP_23078 | 876  | C | T | 3  | 7   | --     | --  |
|            | Ca(ICC2/PI489777)SNP_23079 | 1017 | T | C | 3  | 6   | --     | --  |
|            | Ca(ICC2/PI489777)SNP_23080 | 1458 | T | A | 7  | 3   | --     | --  |
|            | Ca(ICC2/PI489777)SNP_23081 | 1740 | A | G | 8  | 4   | --     | --  |
|            | Ca(ICC2/PI489777)SNP_23082 | 2034 | T | G | 3  | 7   | --     | --  |
|            | Ca(ICC2/PI489777)SNP_23083 | 2209 | G | A | 6  | 6   | --     | --  |



|            |                            |      |   |   |    |    |        |      |
|------------|----------------------------|------|---|---|----|----|--------|------|
| CakTC38832 | Ca(ICC2/PI489777)SNP_23084 | 1293 | A | G | 8  | 4  | --     | --   |
| CakTC37596 | Ca(ICC2/PI489777)SNP_23085 | 246  | C | A | 16 | 11 | --     | --   |
|            | Ca(ICC2/PI489777)SNP_23086 | 456  | C | T | 33 | 15 | --     | --   |
|            | Ca(ICC2/PI489777)SNP_23087 | 936  | G | A | 27 | 26 | --     | --   |
| CakTC22711 | Ca(ICC2/PI489777)SNP_23088 | 237  | T | C | 7  | 3  | --     | --   |
|            | Ca(ICC2/PI489777)SNP_23089 | 310  | T | C | 8  | 3  | --     | --   |
|            | Ca(ICC2/PI489777)SNP_23090 | 375  | A | G | 6  | 3  | --     | --   |
| CakTC00679 | Ca(ICC2/PI489777)SNP_23091 | 151  | T | C | 10 | 4  | --     | --   |
|            | Ca(ICC2/PI489777)SNP_23092 | 331  | C | T | 12 | 5  | --     | --   |
| CakTC25280 | Ca(ICC2/PI489777)SNP_23093 | 175  | A | C | 16 | 20 | --     | --   |
|            | Ca(ICC2/PI489777)SNP_23094 | 219  | T | C | 17 | 22 | --     | --   |
|            | Ca(ICC2/PI489777)SNP_23095 | 385  | A | G | 30 | 30 | --     | --   |
| CakTC41447 | Ca(ICC2/PI489777)SNP_23096 | 100  | A | C | 7  | 3  | --     | --   |
|            | Ca(ICC2/PI489777)SNP_23097 | 307  | T | C | 9  | 5  | --     | --   |
|            | Ca(ICC2/PI489777)SNP_23098 | 352  | A | C | 8  | 6  | --     | --   |
|            | Ca(ICC2/PI489777)SNP_23099 | 406  | T | C | 8  | 4  | --     | --   |
| CakTC27014 | Ca(ICC2/PI489777)SNP_23100 | 1411 | C | T | 6  | 3  | --     | --   |
| CakTC28725 | Ca(ICC2/PI489777)SNP_23101 | 212  | T | G | 12 | 8  | --     | --   |
|            | Ca(ICC2/PI489777)SNP_23102 | 791  | T | C | 66 | 28 | --     | --   |
|            | Ca(ICC2/PI489777)SNP_23103 | 902  | G | A | 58 | 40 | --     | --   |
| CakTC27537 | Ca(ICC2/PI489777)SNP_23104 | 1402 | C | A | 12 | 12 | --     | ARF  |
|            | Ca(ICC2/PI489777)SNP_23105 | 1766 | G | A | 29 | 6  | --     | ARF  |
|            | Ca(ICC2/PI489777)SNP_23106 | 1873 | G | A | 32 | 5  | --     | ARF  |
|            | Ca(ICC2/PI489777)SNP_23107 | 2356 | T | C | 22 | 8  | --     | ARF  |
|            | Ca(ICC2/PI489777)SNP_23108 | 2492 | T | C | 23 | 10 | --     | ARF  |
|            | Ca(ICC2/PI489777)SNP_23109 | 2886 | G | A | 8  | 7  | --     | ARF  |
|            | Ca(ICC2/PI489777)SNP_23110 | 2904 | C | A | 11 | 5  | --     | ARF  |
|            | Ca(ICC2/PI489777)SNP_23111 | 2966 | A | G | 10 | 5  | --     | ARF  |
|            | Ca(ICC2/PI489777)SNP_23112 | 2976 | T | C | 12 | 7  | --     | ARF  |
|            | Ca(ICC2/PI489777)SNP_23113 | 3030 | C | T | 14 | 8  | --     | ARF  |
|            | Ca(ICC2/PI489777)SNP_23114 | 3171 | A | C | 13 | 8  | --     | ARF  |
|            | Ca(ICC2/PI489777)SNP_23115 | 4016 | C | T | 10 | 5  | --     | ARF  |
|            | Ca(ICC2/PI489777)SNP_23116 | 4151 | G | A | 7  | 3  | --     | ARF  |
| CakTC36401 | Ca(ICC2/PI489777)SNP_23117 | 673  | A | C | 3  | 3  | --     | HB   |
|            | Ca(ICC2/PI489777)SNP_23118 | 1624 | G | A | 14 | 5  | --     | HB   |
| CakTC12571 | Ca(ICC2/PI489777)SNP_23119 | 823  | A | G | 4  | 3  | --     | --   |
|            | Ca(ICC2/PI489777)SNP_23120 | 1175 | A | G | 17 | 3  | --     | --   |
|            | Ca(ICC2/PI489777)SNP_23121 | 1389 | T | C | 14 | 5  | --     | --   |
| CakTC27792 | Ca(ICC2/PI489777)SNP_23122 | 146  | C | T | 7  | 30 | --     | bHLH |
|            | Ca(ICC2/PI489777)SNP_23123 | 270  | C | T | 8  | 36 | --     | bHLH |
|            | Ca(ICC2/PI489777)SNP_23124 | 447  | C | T | 5  | 24 | --     | bHLH |
|            | Ca(ICC2/PI489777)SNP_23125 | 876  | G | A | 9  | 24 | --     | bHLH |
|            | Ca(ICC2/PI489777)SNP_23126 | 1072 | C | T | 11 | 18 | --     | bHLH |
|            | Ca(ICC2/PI489777)SNP_23127 | 1079 | C | G | 11 | 19 | --     | bHLH |
| CakTC30281 | Ca(ICC2/PI489777)SNP_23128 | 1064 | T | C | 4  | 3  | Flower | bud  |
| CakTC43273 | Ca(ICC2/PI489777)SNP_23129 | 214  | A | G | 4  | 4  | --     | --   |
| CakTC38297 | Ca(ICC2/PI489777)SNP_23130 | 313  | A | G | 11 | 10 | --     | --   |
|            | Ca(ICC2/PI489777)SNP_23131 | 690  | C | G | 34 | 17 | --     | --   |
|            | Ca(ICC2/PI489777)SNP_23132 | 859  | T | C | 23 | 9  | --     | --   |
| CakTC09890 | Ca(ICC2/PI489777)SNP_23133 | 867  | G | A | 3  | 4  | --     | --   |
| CakTC09170 | Ca(ICC2/PI489777)SNP_23134 | 2285 | T | C | 5  | 4  | --     | --   |
|            | Ca(ICC2/PI489777)SNP_23135 | 4853 | C | T | 6  | 6  | --     | --   |
| CakTC24121 | Ca(ICC2/PI489777)SNP_23136 | 1450 | T | C | 5  | 3  | --     | TPR  |
|            | Ca(ICC2/PI489777)SNP_23137 | 1484 | T | C | 4  | 3  | --     | TPR  |
|            | Ca(ICC2/PI489777)SNP_23138 | 1648 | A | C | 6  | 4  | --     | TPR  |
| CakTC42122 | Ca(ICC2/PI489777)SNP_23139 | 2838 | A | C | 3  | 6  | --     | --   |
|            | Ca(ICC2/PI489777)SNP_23140 | 2862 | T | C | 3  | 6  | --     | --   |
|            | Ca(ICC2/PI489777)SNP_23141 | 3204 | T | A | 29 | 8  | --     | --   |
|            | Ca(ICC2/PI489777)SNP_23142 | 3465 | C | T | 26 | 8  | --     | --   |
|            | Ca(ICC2/PI489777)SNP_23143 | 3525 | G | T | 19 | 9  | --     | --   |
|            | Ca(ICC2/PI489777)SNP_23144 | 3537 | T | C | 16 | 8  | --     | --   |
|            | Ca(ICC2/PI489777)SNP_23145 | 4212 | A | T | 14 | 5  | --     | --   |
|            | Ca(ICC2/PI489777)SNP_23146 | 4260 | A | T | 13 | 5  | --     | --   |
|            | Ca(ICC2/PI489777)SNP_23147 | 4439 | G | C | 4  | 3  | --     | --   |
| CakTC26217 | Ca(ICC2/PI489777)SNP_23148 | 365  | A | G | 11 | 3  | --     | --   |
| CakTC37851 | Ca(ICC2/PI489777)SNP_23149 | 41   | C | T | 8  | 3  | --     | --   |
|            | Ca(ICC2/PI489777)SNP_23150 | 104  | A | C | 8  | 4  | --     | --   |
| CakTC24821 | Ca(ICC2/PI489777)SNP_23151 | 331  | C | T | 52 | 27 | --     | --   |
|            | Ca(ICC2/PI489777)SNP_23152 | 402  | A | G | 43 | 25 | --     | --   |
|            | Ca(ICC2/PI489777)SNP_23153 | 608  | G | A | 65 | 33 | --     | --   |
|            | Ca(ICC2/PI489777)SNP_23154 | 947  | A | G | 86 | 36 | --     | --   |
|            | Ca(ICC2/PI489777)SNP_23155 | 1155 | A | C | 39 | 15 | --     | --   |
| CakTC28323 | Ca(ICC2/PI489777)SNP_23156 | 1345 | G | T | 4  | 3  | --     | --   |
| CakTC32815 | Ca(ICC2/PI489777)SNP_23157 | 14   | T | C | 13 | 4  | --     | --   |

|            |                            |      |   |   |     |     |        |              |
|------------|----------------------------|------|---|---|-----|-----|--------|--------------|
|            | Ca(ICC2/PI489777)SNP_23158 | 38   | T | C | 21  | 7   | --     | --           |
|            | Ca(ICC2/PI489777)SNP_23159 | 277  | T | A | 22  | 8   | --     | --           |
|            | Ca(ICC2/PI489777)SNP_23160 | 299  | T | C | 21  | 8   | --     | --           |
|            | Ca(ICC2/PI489777)SNP_23161 | 319  | A | G | 16  | 8   | --     | --           |
|            | Ca(ICC2/PI489777)SNP_23162 | 364  | T | C | 13  | 8   | --     | --           |
| CakTC35791 | Ca(ICC2/PI489777)SNP_23163 | 1429 | A | G | 32  | 4   | Mature | Leaf         |
|            | Ca(ICC2/PI489777)SNP_23164 | 2016 | A | G | 12  | 10  | Mature | Leaf         |
| CakTC42593 | Ca(ICC2/PI489777)SNP_23165 | 1486 | A | G | 19  | 6   | --     | --           |
| CakTC37976 | Ca(ICC2/PI489777)SNP_23166 | 849  | C | T | 27  | 13  | --     | --           |
|            | Ca(ICC2/PI489777)SNP_23167 | 985  | A | T | 28  | 13  | --     | --           |
|            | Ca(ICC2/PI489777)SNP_23168 | 1162 | G | A | 25  | 11  | --     | --           |
|            | Ca(ICC2/PI489777)SNP_23169 | 1321 | T | C | 19  | 13  | --     | --           |
|            | Ca(ICC2/PI489777)SNP_23170 | 1354 | G | A | 18  | 9   | --     | --           |
|            | Ca(ICC2/PI489777)SNP_23171 | 1531 | G | A | 12  | 7   | --     | --           |
|            | Ca(ICC2/PI489777)SNP_23172 | 1591 | G | A | 8   | 7   | --     | --           |
|            | Ca(ICC2/PI489777)SNP_23173 | 1649 | C | A | 5   | 7   | --     | --           |
|            | Ca(ICC2/PI489777)SNP_23174 | 1743 | G | A | 6   | 4   | --     | --           |
| CakTC33881 | Ca(ICC2/PI489777)SNP_23175 | 443  | G | C | 6   | 4   | --     | --           |
|            | Ca(ICC2/PI489777)SNP_23176 | 495  | C | T | 5   | 4   | --     | --           |
|            | Ca(ICC2/PI489777)SNP_23177 | 516  | T | C | 4   | 4   | --     | --           |
|            | Ca(ICC2/PI489777)SNP_23178 | 520  | A | G | 4   | 4   | --     | --           |
| CakTC37496 | Ca(ICC2/PI489777)SNP_23179 | 502  | C | T | 4   | 5   | --     | bHLH         |
| CakTC43010 | Ca(ICC2/PI489777)SNP_23180 | 227  | A | G | 3   | 4   | --     | --           |
|            | Ca(ICC2/PI489777)SNP_23181 | 344  | G | C | 3   | 4   | --     | --           |
| CakTC39821 | Ca(ICC2/PI489777)SNP_23182 | 646  | T | C | 7   | 5   | --     | --           |
| CakTC26246 | Ca(ICC2/PI489777)SNP_23183 | 303  | A | G | 30  | 16  | --     | --           |
| CakTC37606 | Ca(ICC2/PI489777)SNP_23184 | 501  | C | T | 13  | 8   | --     | --           |
|            | Ca(ICC2/PI489777)SNP_23185 | 568  | C | A | 12  | 11  | --     | --           |
|            | Ca(ICC2/PI489777)SNP_23186 | 832  | C | G | 11  | 8   | --     | --           |
|            | Ca(ICC2/PI489777)SNP_23187 | 1235 | G | C | 5   | 3   | --     | --           |
| CakTC27738 | Ca(ICC2/PI489777)SNP_23188 | 565  | A | T | 147 | 87  | Flower | bud          |
|            | Ca(ICC2/PI489777)SNP_23189 | 676  | G | A | 188 | 114 | Flower | bud          |
|            | Ca(ICC2/PI489777)SNP_23190 | 1249 | A | C | 206 | 149 | Flower | bud          |
| CakTC40088 | Ca(ICC2/PI489777)SNP_23191 | 81   | A | T | 11  | 3   | --     | --           |
|            | Ca(ICC2/PI489777)SNP_23192 | 92   | A | C | 11  | 4   | --     | --           |
|            | Ca(ICC2/PI489777)SNP_23193 | 93   | T | C | 11  | 4   | --     | --           |
|            | Ca(ICC2/PI489777)SNP_23194 | 157  | A | C | 19  | 4   | --     | --           |
|            | Ca(ICC2/PI489777)SNP_23195 | 244  | T | G | 18  | 3   | --     | --           |
|            | Ca(ICC2/PI489777)SNP_23196 | 592  | A | G | 12  | 8   | --     | --           |
|            | Ca(ICC2/PI489777)SNP_23197 | 610  | T | A | 15  | 9   | --     | --           |
|            | Ca(ICC2/PI489777)SNP_23198 | 1424 | C | T | 10  | 4   | --     | --           |
|            | Ca(ICC2/PI489777)SNP_23199 | 1497 | G | A | 10  | 5   | --     | --           |
| CakTC35343 | Ca(ICC2/PI489777)SNP_23200 | 124  | C | T | 3   | 10  | --     | --           |
| CakTC42378 | Ca(ICC2/PI489777)SNP_23201 | 185  | C | T | 4   | 6   | --     | --           |
|            | Ca(ICC2/PI489777)SNP_23202 | 634  | G | A | 9   | 5   | --     | --           |
|            | Ca(ICC2/PI489777)SNP_23203 | 746  | T | C | 9   | 4   | --     | --           |
|            | Ca(ICC2/PI489777)SNP_23204 | 1462 | T | C | 8   | 12  | --     | --           |
|            | Ca(ICC2/PI489777)SNP_23205 | 1584 | A | C | 9   | 9   | --     | --           |
|            | Ca(ICC2/PI489777)SNP_23206 | 1668 | G | T | 9   | 4   | --     | --           |
|            | Ca(ICC2/PI489777)SNP_23207 | 1694 | C | G | 6   | 4   | --     | --           |
| CakTC28455 | Ca(ICC2/PI489777)SNP_23208 | 349  | A | T | 14  | 8   | --     | --           |
|            | Ca(ICC2/PI489777)SNP_23209 | 1077 | A | C | 36  | 10  | --     | --           |
|            | Ca(ICC2/PI489777)SNP_23210 | 1430 | T | C | 23  | 16  | --     | --           |
| CakTC29684 | Ca(ICC2/PI489777)SNP_23211 | 769  | T | A | 7   | 5   | --     | --           |
| CakTC39624 | Ca(ICC2/PI489777)SNP_23212 | 794  | C | T | 5   | 12  | --     | --           |
|            | Ca(ICC2/PI489777)SNP_23213 | 903  | T | C | 6   | 9   | --     | --           |
|            | Ca(ICC2/PI489777)SNP_23214 | 934  | T | C | 5   | 8   | --     | --           |
|            | Ca(ICC2/PI489777)SNP_23215 | 1014 | T | A | 4   | 6   | --     | --           |
|            | Ca(ICC2/PI489777)SNP_23216 | 1058 | A | G | 4   | 6   | --     | --           |
|            | Ca(ICC2/PI489777)SNP_23217 | 1106 | C | A | 8   | 4   | --     | --           |
|            | Ca(ICC2/PI489777)SNP_23218 | 1145 | G | A | 9   | 3   | --     | --           |
| CakTC39702 | Ca(ICC2/PI489777)SNP_23219 | 1181 | T | A | 39  | 36  | --     | --           |
| CakTC27449 | Ca(ICC2/PI489777)SNP_23220 | 665  | T | C | 93  | 17  | --     | C2C2-CO-like |
|            | Ca(ICC2/PI489777)SNP_23221 | 1025 | A | G | 49  | 19  | --     | C2C2-CO-like |
|            | Ca(ICC2/PI489777)SNP_23222 | 1088 | A | G | 48  | 20  | --     | C2C2-CO-like |
| CakTC23127 | Ca(ICC2/PI489777)SNP_23223 | 411  | G | A | 10  | 10  | --     | --           |
| CakTC38764 | Ca(ICC2/PI489777)SNP_23224 | 201  | C | T | 10  | 13  | --     | --           |
|            | Ca(ICC2/PI489777)SNP_23225 | 1231 | T | A | 6   | 12  | --     | --           |
| CakTC10509 | Ca(ICC2/PI489777)SNP_23226 | 829  | A | G | 18  | 6   | --     | --           |
|            | Ca(ICC2/PI489777)SNP_23227 | 961  | G | C | 16  | 7   | --     | --           |
| CakTC31191 | Ca(ICC2/PI489777)SNP_23228 | 1647 | T | A | 8   | 25  | --     | --           |
|            | Ca(ICC2/PI489777)SNP_23229 | 1971 | C | T | 6   | 15  | --     | --           |
| CakTC37829 | Ca(ICC2/PI489777)SNP_23230 | 808  | C | T | 10  | 4   | --     | --           |
|            | Ca(ICC2/PI489777)SNP_23231 | 940  | G | A | 13  | 6   | --     | --           |

|            |                            |      |   |   |    |    |        |             |
|------------|----------------------------|------|---|---|----|----|--------|-------------|
|            | Ca(ICC2/PI489777)SNP_23232 | 1138 | A | G | 21 | 10 | --     | --          |
|            | Ca(ICC2/PI489777)SNP_23233 | 1285 | A | G | 19 | 10 | --     | --          |
|            | Ca(ICC2/PI489777)SNP_23234 | 1303 | G | A | 20 | 9  | --     | --          |
|            | Ca(ICC2/PI489777)SNP_23235 | 1335 | A | G | 23 | 8  | --     | --          |
|            | Ca(ICC2/PI489777)SNP_23236 | 1489 | T | C | 20 | 7  | --     | --          |
|            | Ca(ICC2/PI489777)SNP_23237 | 1529 | A | G | 17 | 5  | --     | --          |
|            | Ca(ICC2/PI489777)SNP_23238 | 1609 | G | T | 11 | 4  | --     | --          |
| CakTC38935 | Ca(ICC2/PI489777)SNP_23239 | 454  | G | A | 17 | 3  | --     | --          |
| CakTC33747 | Ca(ICC2/PI489777)SNP_23240 | 607  | A | C | 70 | 22 | --     | --          |
| CakTC32173 | Ca(ICC2/PI489777)SNP_23241 | 1170 | G | A | 3  | 3  | Flower | bud         |
| CakTC40761 | Ca(ICC2/PI489777)SNP_23242 | 536  | T | G | 72 | 44 | --     | --          |
|            | Ca(ICC2/PI489777)SNP_23243 | 562  | A | C | 63 | 46 | --     | --          |
|            | Ca(ICC2/PI489777)SNP_23244 | 815  | G | T | 19 | 12 | --     | --          |
| CakTC40700 | Ca(ICC2/PI489777)SNP_23245 | 369  | G | C | 11 | 7  | --     | --          |
|            | Ca(ICC2/PI489777)SNP_23246 | 1094 | A | G | 21 | 10 | --     | --          |
|            | Ca(ICC2/PI489777)SNP_23247 | 1129 | C | T | 21 | 13 | --     | --          |
| CakTC39605 | Ca(ICC2/PI489777)SNP_23248 | 1078 | C | A | 6  | 8  | --     | --          |
| CakTC38634 | Ca(ICC2/PI489777)SNP_23249 | 225  | A | T | 3  | 3  | --     | --          |
|            | Ca(ICC2/PI489777)SNP_23250 | 369  | G | A | 8  | 6  | --     | --          |
|            | Ca(ICC2/PI489777)SNP_23251 | 469  | A | T | 8  | 7  | --     | --          |
|            | Ca(ICC2/PI489777)SNP_23252 | 672  | C | T | 9  | 8  | --     | --          |
| CakTC40408 | Ca(ICC2/PI489777)SNP_23253 | 665  | C | T | 8  | 5  | --     | --          |
| CakTC39259 | Ca(ICC2/PI489777)SNP_23254 | 269  | A | G | 7  | 9  | --     | --          |
|            | Ca(ICC2/PI489777)SNP_23255 | 982  | C | T | 87 | 24 | --     | --          |
| CakTC38860 | Ca(ICC2/PI489777)SNP_23256 | 1129 | C | T | 8  | 8  | --     | --          |
| CakTC27509 | Ca(ICC2/PI489777)SNP_23257 | 30   | C | T | 16 | 20 | --     | CCAAT       |
|            | Ca(ICC2/PI489777)SNP_23258 | 330  | C | T | 29 | 34 | --     | CCAAT       |
| CakTC43325 | Ca(ICC2/PI489777)SNP_23259 | 552  | G | A | 7  | 6  | --     | --          |
| CakTC38839 | Ca(ICC2/PI489777)SNP_23260 | 788  | A | G | 9  | 9  | --     | --          |
|            | Ca(ICC2/PI489777)SNP_23261 | 875  | G | A | 13 | 13 | --     | --          |
|            | Ca(ICC2/PI489777)SNP_23262 | 1300 | G | A | 11 | 5  | --     | --          |
| CakTC19569 | Ca(ICC2/PI489777)SNP_23263 | 940  | T | C | 7  | 8  | --     | --          |
| CakTC27925 | Ca(ICC2/PI489777)SNP_23264 | 427  | C | T | 19 | 28 | --     | --          |
| CakTC05876 | Ca(ICC2/PI489777)SNP_23265 | 72   | A | G | 3  | 4  | --     | MYB-related |
| CakTC32239 | Ca(ICC2/PI489777)SNP_23266 | 1642 | G | A | 3  | 5  | --     | --          |
|            | Ca(ICC2/PI489777)SNP_23267 | 1645 | C | T | 3  | 5  | --     | --          |
| CakTC39388 | Ca(ICC2/PI489777)SNP_23268 | 304  | C | T | 16 | 3  | --     | --          |
|            | Ca(ICC2/PI489777)SNP_23269 | 430  | C | T | 18 | 4  | --     | --          |
|            | Ca(ICC2/PI489777)SNP_23270 | 925  | C | T | 8  | 9  | --     | --          |
| CakTC31426 | Ca(ICC2/PI489777)SNP_23271 | 1059 | G | A | 3  | 5  | --     | --          |
| CakTC34126 | Ca(ICC2/PI489777)SNP_23272 | 85   | T | C | 7  | 5  | --     | --          |
|            | Ca(ICC2/PI489777)SNP_23273 | 240  | C | T | 16 | 16 | --     | --          |
|            | Ca(ICC2/PI489777)SNP_23274 | 297  | C | T | 18 | 18 | --     | --          |
|            | Ca(ICC2/PI489777)SNP_23275 | 375  | C | T | 20 | 19 | --     | --          |
|            | Ca(ICC2/PI489777)SNP_23276 | 552  | T | C | 17 | 17 | --     | --          |
|            | Ca(ICC2/PI489777)SNP_23277 | 1026 | T | C | 33 | 20 | --     | --          |
|            | Ca(ICC2/PI489777)SNP_23278 | 3639 | C | A | 24 | 32 | --     | --          |
|            | Ca(ICC2/PI489777)SNP_23279 | 4077 | G | A | 39 | 23 | --     | --          |
|            | Ca(ICC2/PI489777)SNP_23280 | 7028 | G | C | 34 | 22 | --     | --          |
| CakTC31140 | Ca(ICC2/PI489777)SNP_23281 | 694  | A | G | 7  | 3  | --     | --          |
|            | Ca(ICC2/PI489777)SNP_23282 | 711  | C | T | 6  | 3  | --     | --          |
| CakTC10456 | Ca(ICC2/PI489777)SNP_23283 | 770  | G | T | 9  | 4  | --     | --          |
|            | Ca(ICC2/PI489777)SNP_23284 | 784  | G | A | 9  | 5  | --     | --          |
|            | Ca(ICC2/PI489777)SNP_23285 | 874  | C | A | 9  | 4  | --     | --          |
| CakTC31780 | Ca(ICC2/PI489777)SNP_23286 | 439  | A | T | 4  | 5  | --     | --          |
| CakTC42821 | Ca(ICC2/PI489777)SNP_23287 | 482  | G | T | 42 | 28 | --     | --          |
| CakTC22433 | Ca(ICC2/PI489777)SNP_23288 | 309  | T | C | 14 | 5  | --     | --          |
|            | Ca(ICC2/PI489777)SNP_23289 | 310  | G | A | 15 | 5  | --     | --          |
|            | Ca(ICC2/PI489777)SNP_23290 | 475  | C | A | 11 | 4  | --     | --          |
|            | Ca(ICC2/PI489777)SNP_23291 | 584  | A | T | 11 | 5  | --     | --          |
|            | Ca(ICC2/PI489777)SNP_23292 | 590  | A | C | 9  | 6  | --     | --          |
|            | Ca(ICC2/PI489777)SNP_23293 | 631  | C | G | 13 | 5  | --     | --          |
|            | Ca(ICC2/PI489777)SNP_23294 | 650  | C | T | 14 | 7  | --     | --          |
|            | Ca(ICC2/PI489777)SNP_23295 | 794  | C | T | 9  | 5  | --     | --          |
| CakTC40374 | Ca(ICC2/PI489777)SNP_23296 | 209  | T | G | 9  | 9  | --     | --          |
|            | Ca(ICC2/PI489777)SNP_23297 | 257  | C | A | 13 | 17 | --     | --          |
|            | Ca(ICC2/PI489777)SNP_23298 | 258  | G | A | 13 | 17 | --     | --          |
|            | Ca(ICC2/PI489777)SNP_23299 | 285  | T | C | 14 | 18 | --     | --          |
| CakTC37414 | Ca(ICC2/PI489777)SNP_23300 | 450  | C | G | 4  | 5  | --     | --          |
|            | Ca(ICC2/PI489777)SNP_23301 | 559  | A | G | 6  | 5  | --     | --          |
|            | Ca(ICC2/PI489777)SNP_23302 | 598  | T | C | 4  | 3  | --     | --          |
| CakTC25300 | Ca(ICC2/PI489777)SNP_23303 | 281  | C | T | 35 | 9  | --     | --          |
|            | Ca(ICC2/PI489777)SNP_23304 | 332  | C | T | 37 | 11 | --     | --          |
|            | Ca(ICC2/PI489777)SNP_23305 | 520  | A | G | 26 | 12 | --     | --          |

|            |                            |      |   |   |     |    |       |    |
|------------|----------------------------|------|---|---|-----|----|-------|----|
|            | Ca(ICC2/PI489777)SNP_23306 | 621  | G | C | 18  | 10 | --    | -- |
|            | Ca(ICC2/PI489777)SNP_23307 | 673  | T | G | 16  | 9  | --    | -- |
|            | Ca(ICC2/PI489777)SNP_23308 | 701  | C | T | 13  | 8  | --    | -- |
| CakTC29710 | Ca(ICC2/PI489777)SNP_23309 | 922  | C | A | 4   | 5  | Shoot | -- |
|            | Ca(ICC2/PI489777)SNP_23310 | 1038 | A | G | 4   | 8  | Shoot | -- |
|            | Ca(ICC2/PI489777)SNP_23311 | 1084 | G | A | 6   | 7  | Shoot | -- |
| CakTC29708 | Ca(ICC2/PI489777)SNP_23312 | 522  | T | C | 22  | 5  | --    | -- |
|            | Ca(ICC2/PI489777)SNP_23313 | 696  | A | G | 19  | 5  | --    | -- |
| CakTC29993 | Ca(ICC2/PI489777)SNP_23314 | 131  | T | G | 6   | 3  | --    | -- |
|            | Ca(ICC2/PI489777)SNP_23315 | 1243 | C | A | 7   | 9  | --    | -- |
|            | Ca(ICC2/PI489777)SNP_23316 | 2282 | T | C | 11  | 13 | --    | -- |
|            | Ca(ICC2/PI489777)SNP_23317 | 2849 | A | G | 13  | 15 | --    | -- |
| CakTC28365 | Ca(ICC2/PI489777)SNP_23318 | 239  | A | G | 5   | 5  | --    | -- |
|            | Ca(ICC2/PI489777)SNP_23319 | 607  | A | G | 22  | 11 | --    | -- |
| CakTC42531 | Ca(ICC2/PI489777)SNP_23320 | 447  | C | T | 16  | 12 | --    | -- |
| CakTC29982 | Ca(ICC2/PI489777)SNP_23321 | 1109 | C | A | 4   | 6  | --    | -- |
|            | Ca(ICC2/PI489777)SNP_23322 | 2547 | C | T | 6   | 11 | --    | -- |
|            | Ca(ICC2/PI489777)SNP_23323 | 2649 | C | G | 12  | 9  | --    | -- |
| CakTC33460 | Ca(ICC2/PI489777)SNP_23324 | 156  | G | A | 6   | 4  | --    | -- |
|            | Ca(ICC2/PI489777)SNP_23325 | 250  | T | A | 9   | 7  | --    | -- |
|            | Ca(ICC2/PI489777)SNP_23326 | 316  | A | G | 10  | 9  | --    | -- |
|            | Ca(ICC2/PI489777)SNP_23327 | 848  | A | G | 9   | 5  | --    | -- |
|            | Ca(ICC2/PI489777)SNP_23328 | 892  | G | A | 9   | 4  | --    | -- |
|            | Ca(ICC2/PI489777)SNP_23329 | 967  | G | A | 11  | 4  | --    | -- |
|            | Ca(ICC2/PI489777)SNP_23330 | 1291 | A | T | 21  | 13 | --    | -- |
|            | Ca(ICC2/PI489777)SNP_23331 | 1690 | G | A | 11  | 9  | --    | -- |
| CakTC38727 | Ca(ICC2/PI489777)SNP_23332 | 762  | G | A | 6   | 3  | --    | -- |
| CakTC34763 | Ca(ICC2/PI489777)SNP_23333 | 1512 | G | A | 6   | 9  | --    | -- |
|            | Ca(ICC2/PI489777)SNP_23334 | 1586 | T | A | 7   | 10 | --    | -- |
| CakTC34659 | Ca(ICC2/PI489777)SNP_23335 | 502  | C | T | 8   | 4  | --    | -- |
|            | Ca(ICC2/PI489777)SNP_23336 | 583  | C | T | 14  | 4  | --    | -- |
|            | Ca(ICC2/PI489777)SNP_23337 | 1844 | G | A | 20  | 9  | --    | -- |
|            | Ca(ICC2/PI489777)SNP_23338 | 2716 | A | G | 12  | 4  | --    | -- |
|            | Ca(ICC2/PI489777)SNP_23339 | 3469 | C | T | 14  | 6  | --    | -- |
|            | Ca(ICC2/PI489777)SNP_23340 | 3616 | G | A | 11  | 5  | --    | -- |
|            | Ca(ICC2/PI489777)SNP_23341 | 3974 | T | C | 6   | 5  | --    | -- |
|            | Ca(ICC2/PI489777)SNP_23342 | 4759 | T | C | 10  | 3  | --    | -- |
|            | Ca(ICC2/PI489777)SNP_23343 | 4884 | G | A | 9   | 3  | --    | -- |
|            | Ca(ICC2/PI489777)SNP_23344 | 6116 | A | C | 6   | 3  | --    | -- |
|            | Ca(ICC2/PI489777)SNP_23345 | 6187 | A | G | 5   | 3  | --    | -- |
| CakTC33175 | Ca(ICC2/PI489777)SNP_23346 | 393  | G | C | 15  | 11 | --    | -- |
|            | Ca(ICC2/PI489777)SNP_23347 | 429  | C | T | 16  | 11 | --    | -- |
|            | Ca(ICC2/PI489777)SNP_23348 | 537  | G | C | 14  | 7  | --    | -- |
|            | Ca(ICC2/PI489777)SNP_23349 | 725  | G | A | 16  | 9  | --    | -- |
|            | Ca(ICC2/PI489777)SNP_23350 | 786  | C | T | 16  | 10 | --    | -- |
|            | Ca(ICC2/PI489777)SNP_23351 | 1050 | G | A | 18  | 11 | --    | -- |
|            | Ca(ICC2/PI489777)SNP_23352 | 1230 | G | C | 11  | 7  | --    | -- |
|            | Ca(ICC2/PI489777)SNP_23353 | 1404 | C | T | 15  | 14 | --    | -- |
| CakTC40174 | Ca(ICC2/PI489777)SNP_23354 | 45   | T | A | 5   | 3  | --    | -- |
|            | Ca(ICC2/PI489777)SNP_23355 | 66   | T | G | 5   | 4  | --    | -- |
|            | Ca(ICC2/PI489777)SNP_23356 | 995  | A | G | 12  | 6  | --    | -- |
| CakTC39708 | Ca(ICC2/PI489777)SNP_23357 | 839  | C | T | 18  | 40 | --    | -- |
|            | Ca(ICC2/PI489777)SNP_23358 | 884  | G | A | 18  | 36 | --    | -- |
| CakTC27002 | Ca(ICC2/PI489777)SNP_23359 | 36   | G | A | 3   | 4  | --    | -- |
|            | Ca(ICC2/PI489777)SNP_23360 | 324  | T | A | 4   | 4  | --    | -- |
| CakTC24947 | Ca(ICC2/PI489777)SNP_23361 | 1041 | T | A | 114 | 66 | --    | -- |
| CakTC25503 | Ca(ICC2/PI489777)SNP_23362 | 873  | C | A | 10  | 6  | --    | -- |
|            | Ca(ICC2/PI489777)SNP_23363 | 1455 | A | G | 10  | 9  | --    | -- |
| CakTC41412 | Ca(ICC2/PI489777)SNP_23364 | 318  | G | A | 4   | 4  | --    | -- |
| CakTC34142 | Ca(ICC2/PI489777)SNP_23365 | 545  | G | A | 8   | 5  | --    | -- |
| CakTC28418 | Ca(ICC2/PI489777)SNP_23366 | 1379 | G | A | 49  | 13 | --    | -- |
|            | Ca(ICC2/PI489777)SNP_23367 | 1618 | T | A | 24  | 10 | --    | -- |
| CakTC08328 | Ca(ICC2/PI489777)SNP_23368 | 815  | G | A | 3   | 3  | --    | -- |
| CakTC41266 | Ca(ICC2/PI489777)SNP_23369 | 228  | G | A | 13  | 5  | --    | -- |
|            | Ca(ICC2/PI489777)SNP_23370 | 279  | C | T | 18  | 13 | --    | -- |
|            | Ca(ICC2/PI489777)SNP_23371 | 777  | G | A | 12  | 17 | --    | -- |
|            | Ca(ICC2/PI489777)SNP_23372 | 867  | G | A | 22  | 16 | --    | -- |
|            | Ca(ICC2/PI489777)SNP_23373 | 880  | C | T | 25  | 14 | --    | -- |
|            | Ca(ICC2/PI489777)SNP_23374 | 1050 | A | G | 26  | 13 | --    | -- |
|            | Ca(ICC2/PI489777)SNP_23375 | 1200 | T | A | 17  | 24 | --    | -- |
|            | Ca(ICC2/PI489777)SNP_23376 | 1282 | C | A | 16  | 18 | --    | -- |
|            | Ca(ICC2/PI489777)SNP_23377 | 1296 | T | A | 15  | 18 | --    | -- |
|            | Ca(ICC2/PI489777)SNP_23378 | 1609 | G | C | 25  | 13 | --    | -- |
|            | Ca(ICC2/PI489777)SNP_23379 | 1716 | A | G | 25  | 15 | --    | -- |

|            |                            |      |   |   |     |    |        |     |
|------------|----------------------------|------|---|---|-----|----|--------|-----|
| CakTC25742 | Ca(ICC2/P1489777)SNP_23380 | 666  | A | G | 14  | 20 | Shoot  | --  |
|            | Ca(ICC2/P1489777)SNP_23381 | 1053 | A | G | 24  | 14 | Shoot  | --  |
|            | Ca(ICC2/P1489777)SNP_23382 | 1242 | A | G | 30  | 17 | Shoot  | --  |
|            | Ca(ICC2/P1489777)SNP_23383 | 1330 | C | T | 27  | 16 | Shoot  | --  |
|            | Ca(ICC2/P1489777)SNP_23384 | 1665 | T | G | 6   | 9  | Shoot  | --  |
|            | Ca(ICC2/P1489777)SNP_23385 | 1667 | G | T | 7   | 8  | Shoot  | --  |
| CakTC28904 | Ca(ICC2/P1489777)SNP_23386 | 180  | C | T | 6   | 3  | --     | --  |
|            | Ca(ICC2/P1489777)SNP_23387 | 240  | A | C | 8   | 4  | --     | --  |
| CakTC31056 | Ca(ICC2/P1489777)SNP_23388 | 350  | G | C | 5   | 4  | --     | --  |
|            | Ca(ICC2/P1489777)SNP_23389 | 828  | A | T | 20  | 6  | --     | --  |
|            | Ca(ICC2/P1489777)SNP_23390 | 829  | A | T | 20  | 6  | --     | --  |
| CakTC37252 | Ca(ICC2/P1489777)SNP_23391 | 287  | A | G | 3   | 8  | --     | --  |
|            | Ca(ICC2/P1489777)SNP_23392 | 488  | C | G | 4   | 7  | --     | --  |
|            | Ca(ICC2/P1489777)SNP_23393 | 840  | G | C | 6   | 7  | --     | --  |
| CakTC29371 | Ca(ICC2/P1489777)SNP_23394 | 489  | T | C | 4   | 7  | Flower | bud |
|            | Ca(ICC2/P1489777)SNP_23395 | 555  | T | C | 5   | 6  | Flower | bud |
|            | Ca(ICC2/P1489777)SNP_23396 | 567  | C | T | 4   | 5  | Flower | bud |
| CakTC24532 | Ca(ICC2/P1489777)SNP_23397 | 732  | G | A | 14  | 8  | --     | --  |
|            | Ca(ICC2/P1489777)SNP_23398 | 1303 | T | G | 28  | 11 | --     | --  |
|            | Ca(ICC2/P1489777)SNP_23399 | 1349 | G | A | 22  | 11 | --     | --  |
| CakTC29726 | Ca(ICC2/P1489777)SNP_23400 | 1906 | A | C | 10  | 5  | --     | --  |
|            | Ca(ICC2/P1489777)SNP_23401 | 2082 | A | G | 4   | 4  | --     | --  |
| CakTC37420 | Ca(ICC2/P1489777)SNP_23402 | 151  | C | A | 16  | 9  | --     | --  |
|            | Ca(ICC2/P1489777)SNP_23403 | 349  | G | A | 27  | 16 | --     | --  |
| CakTC42801 | Ca(ICC2/P1489777)SNP_23404 | 1801 | G | C | 7   | 3  | --     | --  |
| CakTC28597 | Ca(ICC2/P1489777)SNP_23405 | 925  | A | C | 26  | 5  | --     | --  |
| CakTC28098 | Ca(ICC2/P1489777)SNP_23406 | 288  | A | T | 3   | 4  | --     | --  |
|            | Ca(ICC2/P1489777)SNP_23407 | 452  | G | C | 5   | 7  | --     | --  |
|            | Ca(ICC2/P1489777)SNP_23408 | 564  | T | C | 12  | 6  | --     | --  |
|            | Ca(ICC2/P1489777)SNP_23409 | 1955 | G | A | 8   | 4  | --     | --  |
| CakTC27103 | Ca(ICC2/P1489777)SNP_23410 | 4257 | G | T | 7   | 7  | --     | --  |
|            | Ca(ICC2/P1489777)SNP_23411 | 4546 | G | A | 19  | 6  | --     | --  |
|            | Ca(ICC2/P1489777)SNP_23412 | 5309 | C | T | 17  | 6  | --     | --  |
| CakTC24581 | Ca(ICC2/P1489777)SNP_23413 | 1419 | C | T | 9   | 8  | --     | --  |
|            | Ca(ICC2/P1489777)SNP_23414 | 1894 | T | C | 7   | 3  | --     | --  |
| CakTC32948 | Ca(ICC2/P1489777)SNP_23415 | 527  | T | A | 31  | 10 | --     | --  |
|            | Ca(ICC2/P1489777)SNP_23416 | 591  | A | G | 34  | 13 | --     | --  |
|            | Ca(ICC2/P1489777)SNP_23417 | 1415 | G | A | 6   | 8  | --     | --  |
|            | Ca(ICC2/P1489777)SNP_23418 | 1957 | C | T | 5   | 8  | --     | --  |
| CakTC39342 | Ca(ICC2/P1489777)SNP_23419 | 464  | C | T | 46  | 26 | --     | --  |
| CakTC25053 | Ca(ICC2/P1489777)SNP_23420 | 167  | C | G | 12  | 8  | --     | LUG |
|            | Ca(ICC2/P1489777)SNP_23421 | 693  | G | A | 9   | 6  | --     | LUG |
|            | Ca(ICC2/P1489777)SNP_23422 | 732  | G | T | 11  | 8  | --     | LUG |
|            | Ca(ICC2/P1489777)SNP_23423 | 1296 | A | G | 19  | 13 | --     | LUG |
|            | Ca(ICC2/P1489777)SNP_23424 | 1815 | G | A | 16  | 15 | --     | LUG |
|            | Ca(ICC2/P1489777)SNP_23425 | 2148 | T | C | 9   | 8  | --     | LUG |
|            | Ca(ICC2/P1489777)SNP_23426 | 2181 | G | A | 11  | 7  | --     | LUG |
|            | Ca(ICC2/P1489777)SNP_23427 | 2400 | A | G | 12  | 10 | --     | LUG |
|            | Ca(ICC2/P1489777)SNP_23428 | 2841 | A | C | 13  | 12 | --     | LUG |
|            | Ca(ICC2/P1489777)SNP_23429 | 2984 | G | A | 14  | 7  | --     | LUG |
|            | Ca(ICC2/P1489777)SNP_23430 | 3054 | A | T | 16  | 6  | --     | LUG |
| CakTC29075 | Ca(ICC2/P1489777)SNP_23431 | 1563 | T | C | 4   | 3  | --     | HB  |
|            | Ca(ICC2/P1489777)SNP_23432 | 1780 | T | C | 8   | 3  | --     | HB  |
| CakTC37014 | Ca(ICC2/P1489777)SNP_23433 | 251  | A | C | 4   | 5  | --     | --  |
|            | Ca(ICC2/P1489777)SNP_23434 | 321  | G | A | 6   | 5  | --     | --  |
|            | Ca(ICC2/P1489777)SNP_23435 | 701  | T | C | 3   | 9  | --     | --  |
| CakTC39348 | Ca(ICC2/P1489777)SNP_23436 | 697  | A | C | 111 | 44 | --     | --  |
|            | Ca(ICC2/P1489777)SNP_23437 | 846  | A | C | 130 | 38 | --     | --  |
|            | Ca(ICC2/P1489777)SNP_23438 | 907  | T | C | 133 | 50 | --     | --  |
|            | Ca(ICC2/P1489777)SNP_23439 | 1080 | T | C | 96  | 43 | --     | --  |
| CakTC29848 | Ca(ICC2/P1489777)SNP_23440 | 145  | C | T | 7   | 6  | --     | --  |
|            | Ca(ICC2/P1489777)SNP_23441 | 148  | G | A | 7   | 6  | --     | --  |
|            | Ca(ICC2/P1489777)SNP_23442 | 1688 | G | A | 33  | 16 | --     | --  |
|            | Ca(ICC2/P1489777)SNP_23443 | 1709 | G | A | 30  | 16 | --     | --  |
|            | Ca(ICC2/P1489777)SNP_23444 | 1779 | G | C | 27  | 15 | --     | --  |
|            | Ca(ICC2/P1489777)SNP_23445 | 1992 | A | G | 35  | 17 | --     | --  |
|            | Ca(ICC2/P1489777)SNP_23446 | 2257 | T | G | 21  | 9  | --     | --  |
|            | Ca(ICC2/P1489777)SNP_23447 | 2355 | C | T | 22  | 12 | --     | --  |
|            | Ca(ICC2/P1489777)SNP_23448 | 2373 | T | G | 27  | 11 | --     | --  |
| CakTC15600 | Ca(ICC2/P1489777)SNP_23449 | 184  | T | C | 4   | 4  | --     | --  |
| CakTC27342 | Ca(ICC2/P1489777)SNP_23450 | 67   | G | C | 22  | 5  | --     | --  |
|            | Ca(ICC2/P1489777)SNP_23451 | 121  | A | G | 23  | 9  | --     | --  |
|            | Ca(ICC2/P1489777)SNP_23452 | 138  | C | T | 27  | 27 | --     | --  |
|            | Ca(ICC2/P1489777)SNP_23453 | 152  | G | A | 53  | 29 | --     | --  |

|            |                            |      |   |   |     |    |        |          |
|------------|----------------------------|------|---|---|-----|----|--------|----------|
|            | Ca(ICC2/PI489777)SNP_23454 | 153  | T | C | 54  | 29 | --     | --       |
|            | Ca(ICC2/PI489777)SNP_23455 | 682  | G | A | 15  | 6  | --     | --       |
| CakTC31858 | Ca(ICC2/PI489777)SNP_23456 | 1520 | A | C | 12  | 4  | Root   | --       |
| CakTC27867 | Ca(ICC2/PI489777)SNP_23457 | 884  | T | C | 12  | 6  | --     | --       |
|            | Ca(ICC2/PI489777)SNP_23458 | 959  | T | C | 8   | 7  | --     | --       |
| CakTC32158 | Ca(ICC2/PI489777)SNP_23459 | 249  | A | G | 4   | 4  | --     | --       |
| CakTC36522 | Ca(ICC2/PI489777)SNP_23460 | 2075 | T | C | 20  | 9  | --     | --       |
|            | Ca(ICC2/PI489777)SNP_23461 | 3746 | G | A | 22  | 11 | --     | --       |
| CakTC37671 | Ca(ICC2/PI489777)SNP_23462 | 163  | C | A | 7   | 8  | --     | --       |
|            | Ca(ICC2/PI489777)SNP_23463 | 349  | C | T | 9   | 8  | --     | --       |
|            | Ca(ICC2/PI489777)SNP_23464 | 748  | T | C | 21  | 6  | --     | --       |
|            | Ca(ICC2/PI489777)SNP_23465 | 1000 | T | C | 6   | 4  | --     | --       |
|            | Ca(ICC2/PI489777)SNP_23466 | 1080 | A | T | 4   | 3  | --     | --       |
|            | Ca(ICC2/PI489777)SNP_23467 | 1114 | T | C | 4   | 3  | --     | --       |
| CakTC34550 | Ca(ICC2/PI489777)SNP_23468 | 1177 | G | A | 3   | 8  | Flower | bud      |
|            | Ca(ICC2/PI489777)SNP_23469 | 1285 | T | A | 18  | 10 | Flower | bud      |
|            | Ca(ICC2/PI489777)SNP_23470 | 1626 | A | G | 3   | 4  | Flower | bud      |
| CakTC36072 | Ca(ICC2/PI489777)SNP_23471 | 532  | C | T | 23  | 14 | --     | --       |
|            | Ca(ICC2/PI489777)SNP_23472 | 1642 | G | A | 13  | 18 | --     | --       |
|            | Ca(ICC2/PI489777)SNP_23473 | 2238 | A | C | 31  | 13 | --     | --       |
|            | Ca(ICC2/PI489777)SNP_23474 | 2548 | A | G | 25  | 4  | --     | --       |
|            | Ca(ICC2/PI489777)SNP_23475 | 3714 | T | C | 15  | 10 | --     | --       |
|            | Ca(ICC2/PI489777)SNP_23476 | 3719 | C | G | 15  | 10 | --     | --       |
|            | Ca(ICC2/PI489777)SNP_23477 | 4702 | A | G | 6   | 12 | --     | --       |
|            | Ca(ICC2/PI489777)SNP_23478 | 4716 | G | A | 6   | 11 | --     | --       |
|            | Ca(ICC2/PI489777)SNP_23479 | 4918 | G | A | 12  | 17 | --     | --       |
|            | Ca(ICC2/PI489777)SNP_23480 | 5371 | A | G | 5   | 4  | --     | --       |
| CakTC38400 | Ca(ICC2/PI489777)SNP_23481 | 82   | A | C | 9   | 25 | --     | --       |
| CakTC00195 | Ca(ICC2/PI489777)SNP_23482 | 424  | G | C | 6   | 6  | --     | WRKY     |
|            | Ca(ICC2/PI489777)SNP_23483 | 456  | C | T | 8   | 10 | --     | WRKY     |
|            | Ca(ICC2/PI489777)SNP_23484 | 570  | T | A | 4   | 9  | --     | WRKY     |
|            | Ca(ICC2/PI489777)SNP_23485 | 697  | A | C | 7   | 4  | --     | WRKY     |
|            | Ca(ICC2/PI489777)SNP_23486 | 707  | C | G | 7   | 4  | --     | WRKY     |
|            | Ca(ICC2/PI489777)SNP_23487 | 708  | T | G | 7   | 4  | --     | WRKY     |
|            | Ca(ICC2/PI489777)SNP_23488 | 849  | G | A | 3   | 8  | --     | WRKY     |
|            | Ca(ICC2/PI489777)SNP_23489 | 1002 | A | G | 5   | 13 | --     | WRKY     |
|            | Ca(ICC2/PI489777)SNP_23490 | 1134 | A | G | 4   | 14 | --     | WRKY     |
|            | Ca(ICC2/PI489777)SNP_23491 | 1260 | C | G | 7   | 12 | --     | WRKY     |
|            | Ca(ICC2/PI489777)SNP_23492 | 1320 | C | T | 6   | 12 | --     | WRKY     |
| CakTC22444 | Ca(ICC2/PI489777)SNP_23493 | 535  | T | A | 3   | 3  | --     | --       |
|            | Ca(ICC2/PI489777)SNP_23494 | 703  | T | C | 4   | 3  | --     | --       |
| CakTC39759 | Ca(ICC2/PI489777)SNP_23495 | 314  | C | T | 20  | 6  | --     | --       |
|            | Ca(ICC2/PI489777)SNP_23496 | 713  | G | A | 12  | 9  | --     | --       |
|            | Ca(ICC2/PI489777)SNP_23497 | 1034 | T | C | 20  | 8  | --     | --       |
|            | Ca(ICC2/PI489777)SNP_23498 | 1076 | C | T | 21  | 8  | --     | --       |
|            | Ca(ICC2/PI489777)SNP_23499 | 1118 | A | T | 17  | 6  | --     | --       |
|            | Ca(ICC2/PI489777)SNP_23500 | 1170 | A | G | 17  | 8  | --     | --       |
| CakTC23110 | Ca(ICC2/PI489777)SNP_23501 | 282  | A | G | 9   | 3  | Flower | bud      |
| CakTC39589 | Ca(ICC2/PI489777)SNP_23502 | 472  | A | C | 10  | 4  | --     | --       |
|            | Ca(ICC2/PI489777)SNP_23503 | 497  | T | C | 7   | 4  | --     | --       |
| CakTC25318 | Ca(ICC2/PI489777)SNP_23504 | 74   | C | T | 3   | 7  | --     | --       |
|            | Ca(ICC2/PI489777)SNP_23505 | 220  | C | T | 3   | 7  | --     | --       |
| CakTC40756 | Ca(ICC2/PI489777)SNP_23506 | 1248 | G | A | 6   | 9  | --     | --       |
|            | Ca(ICC2/PI489777)SNP_23507 | 1249 | C | T | 6   | 9  | --     | --       |
|            | Ca(ICC2/PI489777)SNP_23508 | 1432 | T | C | 7   | 13 | --     | --       |
|            | Ca(ICC2/PI489777)SNP_23509 | 1878 | A | G | 3   | 3  | --     | --       |
| CakTC38189 | Ca(ICC2/PI489777)SNP_23510 | 146  | C | G | 6   | 4  | --     | Trihelix |
| CakTC26075 | Ca(ICC2/PI489777)SNP_23511 | 264  | G | C | 56  | 20 | --     | --       |
|            | Ca(ICC2/PI489777)SNP_23512 | 1400 | T | C | 156 | 55 | --     | --       |
|            | Ca(ICC2/PI489777)SNP_23513 | 1409 | G | A | 158 | 59 | --     | --       |
| CakTC09978 | Ca(ICC2/PI489777)SNP_23514 | 607  | A | C | 5   | 3  | --     | --       |
|            | Ca(ICC2/PI489777)SNP_23515 | 706  | T | C | 4   | 3  | --     | --       |
| CakTC37326 | Ca(ICC2/PI489777)SNP_23516 | 387  | C | T | 28  | 29 | --     | --       |
|            | Ca(ICC2/PI489777)SNP_23517 | 534  | T | C | 46  | 46 | --     | --       |
|            | Ca(ICC2/PI489777)SNP_23518 | 708  | A | G | 39  | 47 | --     | --       |
| CakTC27587 | Ca(ICC2/PI489777)SNP_23519 | 550  | G | A | 8   | 6  | --     | --       |
|            | Ca(ICC2/PI489777)SNP_23520 | 810  | C | A | 22  | 5  | --     | --       |
|            | Ca(ICC2/PI489777)SNP_23521 | 947  | T | G | 24  | 3  | --     | --       |
| CakTC21835 | Ca(ICC2/PI489777)SNP_23522 | 95   | C | A | 6   | 6  | Flower | bud      |
|            | Ca(ICC2/PI489777)SNP_23523 | 271  | T | C | 6   | 8  | Flower | bud      |
| CakTC36781 | Ca(ICC2/PI489777)SNP_23524 | 1892 | T | G | 8   | 3  | --     | --       |
|            | Ca(ICC2/PI489777)SNP_23525 | 2168 | C | T | 9   | 7  | --     | --       |
| CakTC43221 | Ca(ICC2/PI489777)SNP_23526 | 784  | T | C | 13  | 10 | --     | --       |
|            | Ca(ICC2/PI489777)SNP_23527 | 856  | T | A | 15  | 14 | --     | --       |

|            |                            |      |   |   |    |    |        |      |
|------------|----------------------------|------|---|---|----|----|--------|------|
|            | Ca(ICC2/PI489777)SNP_23528 | 1178 | A | G | 26 | 28 | --     | --   |
|            | Ca(ICC2/PI489777)SNP_23529 | 1561 | A | G | 16 | 14 | --     | --   |
|            | Ca(ICC2/PI489777)SNP_23530 | 1562 | G | C | 16 | 14 | --     | --   |
| CakTC32349 | Ca(ICC2/PI489777)SNP_23531 | 388  | A | C | 6  | 3  | --     | --   |
|            | Ca(ICC2/PI489777)SNP_23532 | 487  | G | A | 13 | 9  | --     | --   |
|            | Ca(ICC2/PI489777)SNP_23533 | 832  | T | C | 8  | 16 | --     | --   |
|            | Ca(ICC2/PI489777)SNP_23534 | 933  | T | G | 10 | 9  | --     | --   |
|            | Ca(ICC2/PI489777)SNP_23535 | 1759 | C | T | 7  | 7  | --     | --   |
|            | Ca(ICC2/PI489777)SNP_23536 | 1941 | C | T | 11 | 4  | --     | --   |
|            | Ca(ICC2/PI489777)SNP_23537 | 1971 | C | G | 8  | 4  | --     | --   |
|            | Ca(ICC2/PI489777)SNP_23538 | 2230 | A | C | 8  | 4  | --     | --   |
|            | Ca(ICC2/PI489777)SNP_23539 | 2788 | T | A | 6  | 5  | --     | --   |
|            | Ca(ICC2/PI489777)SNP_23540 | 3643 | C | T | 7  | 4  | --     | --   |
|            | Ca(ICC2/PI489777)SNP_23541 | 4451 | T | C | 13 | 4  | --     | --   |
|            | Ca(ICC2/PI489777)SNP_23542 | 4474 | T | C | 11 | 3  | --     | --   |
|            | Ca(ICC2/PI489777)SNP_23543 | 5876 | G | A | 4  | 3  | --     | --   |
| CakTC23392 | Ca(ICC2/PI489777)SNP_23544 | 803  | G | A | 23 | 3  | --     | --   |
|            | Ca(ICC2/PI489777)SNP_23545 | 931  | T | C | 21 | 4  | --     | --   |
|            | Ca(ICC2/PI489777)SNP_23546 | 958  | C | A | 22 | 3  | --     | --   |
| CakTC25784 | Ca(ICC2/PI489777)SNP_23547 | 173  | C | T | 11 | 3  | --     | --   |
|            | Ca(ICC2/PI489777)SNP_23548 | 176  | C | G | 12 | 3  | --     | --   |
|            | Ca(ICC2/PI489777)SNP_23549 | 365  | A | T | 14 | 4  | --     | --   |
|            | Ca(ICC2/PI489777)SNP_23550 | 406  | T | C | 15 | 4  | --     | --   |
| CakTC36491 | Ca(ICC2/PI489777)SNP_23551 | 443  | C | T | 4  | 3  | --     | --   |
| CakTC39425 | Ca(ICC2/PI489777)SNP_23552 | 1250 | C | G | 5  | 4  | --     | --   |
| CakTC24711 | Ca(ICC2/PI489777)SNP_23553 | 53   | G | A | 3  | 3  | Flower | bud  |
| CakTC32575 | Ca(ICC2/PI489777)SNP_23554 | 377  | G | A | 7  | 7  | --     | --   |
|            | Ca(ICC2/PI489777)SNP_23555 | 639  | G | T | 9  | 4  | --     | --   |
|            | Ca(ICC2/PI489777)SNP_23556 | 647  | A | T | 7  | 4  | --     | --   |
|            | Ca(ICC2/PI489777)SNP_23557 | 916  | C | G | 16 | 3  | --     | --   |
| CakTC42902 | Ca(ICC2/PI489777)SNP_23558 | 1595 | T | C | 3  | 5  | --     | --   |
| CakTC11394 | Ca(ICC2/PI489777)SNP_23559 | 388  | G | A | 7  | 6  | --     | --   |
| CakTC26341 | Ca(ICC2/PI489777)SNP_23560 | 339  | T | C | 11 | 7  | --     | --   |
|            | Ca(ICC2/PI489777)SNP_23561 | 2526 | A | C | 12 | 10 | --     | --   |
|            | Ca(ICC2/PI489777)SNP_23562 | 2748 | C | A | 18 | 4  | --     | --   |
|            | Ca(ICC2/PI489777)SNP_23563 | 4008 | T | C | 7  | 9  | --     | --   |
|            | Ca(ICC2/PI489777)SNP_23564 | 4105 | T | G | 9  | 9  | --     | --   |
|            | Ca(ICC2/PI489777)SNP_23565 | 4485 | C | T | 9  | 5  | --     | --   |
|            | Ca(ICC2/PI489777)SNP_23566 | 4938 | T | A | 8  | 3  | --     | --   |
|            | Ca(ICC2/PI489777)SNP_23567 | 5178 | G | T | 14 | 7  | --     | --   |
|            | Ca(ICC2/PI489777)SNP_23568 | 5487 | A | T | 18 | 9  | --     | --   |
| CakTC38478 | Ca(ICC2/PI489777)SNP_23569 | 35   | C | T | 15 | 6  | --     | --   |
|            | Ca(ICC2/PI489777)SNP_23570 | 82   | C | G | 22 | 7  | --     | --   |
|            | Ca(ICC2/PI489777)SNP_23571 | 323  | T | C | 21 | 9  | --     | --   |
|            | Ca(ICC2/PI489777)SNP_23572 | 438  | G | A | 23 | 11 | --     | --   |
|            | Ca(ICC2/PI489777)SNP_23573 | 468  | C | T | 24 | 13 | --     | --   |
|            | Ca(ICC2/PI489777)SNP_23574 | 559  | T | C | 14 | 14 | --     | --   |
|            | Ca(ICC2/PI489777)SNP_23575 | 662  | T | C | 18 | 14 | --     | --   |
|            | Ca(ICC2/PI489777)SNP_23576 | 665  | T | C | 19 | 16 | --     | --   |
|            | Ca(ICC2/PI489777)SNP_23577 | 989  | T | A | 17 | 18 | --     | --   |
|            | Ca(ICC2/PI489777)SNP_23578 | 1227 | C | A | 11 | 20 | --     | --   |
| CakTC23814 | Ca(ICC2/PI489777)SNP_23579 | 584  | G | T | 10 | 7  | --     | --   |
|            | Ca(ICC2/PI489777)SNP_23580 | 641  | C | G | 8  | 7  | --     | --   |
|            | Ca(ICC2/PI489777)SNP_23581 | 730  | G | A | 6  | 13 | --     | --   |
|            | Ca(ICC2/PI489777)SNP_23582 | 1034 | C | T | 7  | 5  | --     | --   |
| CakTC43346 | Ca(ICC2/PI489777)SNP_23583 | 128  | T | C | 21 | 30 | --     | --   |
|            | Ca(ICC2/PI489777)SNP_23584 | 538  | T | C | 44 | 57 | --     | --   |
|            | Ca(ICC2/PI489777)SNP_23585 | 803  | G | C | 18 | 20 | --     | --   |
| CakTC23084 | Ca(ICC2/PI489777)SNP_23586 | 352  | C | T | 7  | 7  | --     | --   |
|            | Ca(ICC2/PI489777)SNP_23587 | 386  | T | C | 7  | 10 | --     | --   |
|            | Ca(ICC2/PI489777)SNP_23588 | 626  | G | A | 9  | 3  | --     | --   |
| CakTC37581 | Ca(ICC2/PI489777)SNP_23589 | 520  | C | T | 13 | 47 | --     | --   |
|            | Ca(ICC2/PI489777)SNP_23590 | 673  | C | T | 12 | 29 | --     | --   |
| CakTC08847 | Ca(ICC2/PI489777)SNP_23591 | 198  | C | T | 6  | 3  | --     | --   |
|            | Ca(ICC2/PI489777)SNP_23592 | 907  | T | A | 19 | 3  | --     | --   |
| CakTC38848 | Ca(ICC2/PI489777)SNP_23593 | 288  | C | G | 5  | 3  | Flower | bud  |
|            | Ca(ICC2/PI489777)SNP_23594 | 393  | C | A | 5  | 3  | Flower | bud  |
| CakTC04834 | Ca(ICC2/PI489777)SNP_23595 | 433  | G | T | 6  | 11 | --     | bZIP |
| CakTC37996 | Ca(ICC2/PI489777)SNP_23596 | 14   | A | G | 3  | 12 | --     | --   |
|            | Ca(ICC2/PI489777)SNP_23597 | 66   | A | G | 8  | 15 | --     | --   |
|            | Ca(ICC2/PI489777)SNP_23598 | 93   | T | A | 11 | 9  | --     | --   |
|            | Ca(ICC2/PI489777)SNP_23599 | 197  | G | T | 20 | 24 | --     | --   |
|            | Ca(ICC2/PI489777)SNP_23600 | 357  | A | C | 24 | 24 | --     | --   |
|            | Ca(ICC2/PI489777)SNP_23601 | 360  | G | A | 24 | 24 | --     | --   |

|            |                            |      |   |   |    |    |    |      |
|------------|----------------------------|------|---|---|----|----|----|------|
|            | Ca(ICC2/PI489777)SNP_23602 | 456  | A | G | 23 | 16 | -- | --   |
|            | Ca(ICC2/PI489777)SNP_23603 | 825  | A | G | 12 | 6  | -- | --   |
| CakTC41691 | Ca(ICC2/PI489777)SNP_23604 | 182  | C | G | 11 | 14 | -- | --   |
| CakTC40907 | Ca(ICC2/PI489777)SNP_23605 | 676  | G | A | 6  | 3  | -- | MYB  |
| CakTC40808 | Ca(ICC2/PI489777)SNP_23606 | 509  | G | C | 7  | 13 | -- | --   |
| CakTC11513 | Ca(ICC2/PI489777)SNP_23607 | 138  | C | G | 18 | 28 | -- | --   |
| CakTC38454 | Ca(ICC2/PI489777)SNP_23608 | 354  | C | A | 33 | 18 | -- | bHLH |
|            | Ca(ICC2/PI489777)SNP_23609 | 409  | A | T | 41 | 25 | -- | bHLH |
|            | Ca(ICC2/PI489777)SNP_23610 | 478  | G | A | 48 | 26 | -- | bHLH |
|            | Ca(ICC2/PI489777)SNP_23611 | 574  | G | T | 40 | 20 | -- | bHLH |
|            | Ca(ICC2/PI489777)SNP_23612 | 787  | T | C | 30 | 5  | -- | bHLH |
|            | Ca(ICC2/PI489777)SNP_23613 | 829  | A | G | 21 | 6  | -- | bHLH |
| CakTC10770 | Ca(ICC2/PI489777)SNP_23614 | 1338 | G | A | 37 | 5  | -- | --   |
| CakTC26679 | Ca(ICC2/PI489777)SNP_23615 | 876  | A | G | 35 | 9  | -- | --   |
|            | Ca(ICC2/PI489777)SNP_23616 | 933  | G | A | 27 | 4  | -- | --   |
|            | Ca(ICC2/PI489777)SNP_23617 | 1333 | A | C | 20 | 13 | -- | --   |
|            | Ca(ICC2/PI489777)SNP_23618 | 2175 | G | A | 7  | 4  | -- | --   |
| CakTC42061 | Ca(ICC2/PI489777)SNP_23619 | 378  | T | C | 3  | 4  | -- | --   |
|            | Ca(ICC2/PI489777)SNP_23620 | 664  | G | A | 5  | 4  | -- | --   |
|            | Ca(ICC2/PI489777)SNP_23621 | 1160 | A | G | 5  | 5  | -- | --   |
|            | Ca(ICC2/PI489777)SNP_23622 | 1210 | C | A | 6  | 4  | -- | --   |
|            | Ca(ICC2/PI489777)SNP_23623 | 1478 | G | A | 11 | 9  | -- | --   |
|            | Ca(ICC2/PI489777)SNP_23624 | 1626 | T | C | 9  | 14 | -- | --   |
| CakTC24506 | Ca(ICC2/PI489777)SNP_23625 | 771  | G | A | 30 | 14 | -- | --   |
|            | Ca(ICC2/PI489777)SNP_23626 | 1064 | A | G | 32 | 8  | -- | --   |
|            | Ca(ICC2/PI489777)SNP_23627 | 1705 | C | G | 23 | 12 | -- | --   |
| CakTC42245 | Ca(ICC2/PI489777)SNP_23628 | 103  | A | G | 4  | 7  | -- | --   |
|            | Ca(ICC2/PI489777)SNP_23629 | 454  | C | T | 9  | 13 | -- | --   |
|            | Ca(ICC2/PI489777)SNP_23630 | 723  | T | G | 11 | 10 | -- | --   |
| CakTC22843 | Ca(ICC2/PI489777)SNP_23631 | 201  | C | A | 9  | 3  | -- | --   |
|            | Ca(ICC2/PI489777)SNP_23632 | 345  | A | G | 16 | 5  | -- | --   |
|            | Ca(ICC2/PI489777)SNP_23633 | 387  | T | G | 33 | 6  | -- | --   |
|            | Ca(ICC2/PI489777)SNP_23634 | 1444 | C | T | 8  | 4  | -- | --   |
| CakTC26380 | Ca(ICC2/PI489777)SNP_23635 | 295  | A | T | 9  | 7  | -- | --   |
|            | Ca(ICC2/PI489777)SNP_23636 | 302  | T | C | 7  | 7  | -- | --   |
|            | Ca(ICC2/PI489777)SNP_23637 | 653  | T | C | 12 | 7  | -- | --   |
|            | Ca(ICC2/PI489777)SNP_23638 | 759  | G | C | 10 | 3  | -- | --   |
|            | Ca(ICC2/PI489777)SNP_23639 | 1294 | C | T | 4  | 4  | -- | --   |
| CakTC40144 | Ca(ICC2/PI489777)SNP_23640 | 163  | C | T | 3  | 9  | -- | --   |
| CakTC27676 | Ca(ICC2/PI489777)SNP_23641 | 388  | C | T | 16 | 15 | -- | --   |
|            | Ca(ICC2/PI489777)SNP_23642 | 572  | G | A | 24 | 14 | -- | --   |
|            | Ca(ICC2/PI489777)SNP_23643 | 625  | G | A | 21 | 15 | -- | --   |
|            | Ca(ICC2/PI489777)SNP_23644 | 707  | A | G | 16 | 13 | -- | --   |
| CakTC29355 | Ca(ICC2/PI489777)SNP_23645 | 1074 | C | A | 10 | 8  | -- | --   |
| CakTC42546 | Ca(ICC2/PI489777)SNP_23646 | 1190 | A | G | 4  | 3  | -- | --   |
| CakTC00046 | Ca(ICC2/PI489777)SNP_23647 | 161  | T | G | 8  | 9  | -- | --   |
| CakTC24339 | Ca(ICC2/PI489777)SNP_23648 | 701  | C | G | 14 | 3  | -- | --   |
|            | Ca(ICC2/PI489777)SNP_23649 | 757  | T | C | 14 | 5  | -- | --   |
|            | Ca(ICC2/PI489777)SNP_23650 | 792  | G | A | 12 | 5  | -- | --   |
|            | Ca(ICC2/PI489777)SNP_23651 | 890  | C | T | 9  | 3  | -- | --   |
| CakTC30508 | Ca(ICC2/PI489777)SNP_23652 | 1086 | A | T | 5  | 4  | -- | --   |
| CakTC42687 | Ca(ICC2/PI489777)SNP_23653 | 859  | A | T | 11 | 4  | -- | --   |
|            | Ca(ICC2/PI489777)SNP_23654 | 1186 | C | T | 13 | 6  | -- | --   |
| CakTC27053 | Ca(ICC2/PI489777)SNP_23655 | 589  | C | G | 7  | 11 | -- | --   |
|            | Ca(ICC2/PI489777)SNP_23656 | 622  | A | G | 7  | 14 | -- | --   |
| CakTC37224 | Ca(ICC2/PI489777)SNP_23657 | 255  | G | C | 43 | 15 | -- | --   |
|            | Ca(ICC2/PI489777)SNP_23658 | 314  | T | C | 52 | 28 | -- | --   |
|            | Ca(ICC2/PI489777)SNP_23659 | 371  | T | C | 57 | 25 | -- | --   |
|            | Ca(ICC2/PI489777)SNP_23660 | 830  | C | G | 41 | 14 | -- | --   |
|            | Ca(ICC2/PI489777)SNP_23661 | 897  | G | A | 38 | 15 | -- | --   |
|            | Ca(ICC2/PI489777)SNP_23662 | 941  | A | G | 42 | 18 | -- | --   |
|            | Ca(ICC2/PI489777)SNP_23663 | 1536 | A | G | 11 | 4  | -- | --   |
| CakTC28686 | Ca(ICC2/PI489777)SNP_23664 | 644  | G | A | 7  | 9  | -- | --   |
|            | Ca(ICC2/PI489777)SNP_23665 | 913  | T | G | 6  | 4  | -- | --   |
|            | Ca(ICC2/PI489777)SNP_23666 | 1188 | G | A | 3  | 4  | -- | --   |
| CakTC29430 | Ca(ICC2/PI489777)SNP_23667 | 543  | T | C | 14 | 20 | -- | --   |
|            | Ca(ICC2/PI489777)SNP_23668 | 552  | C | T | 14 | 17 | -- | --   |
|            | Ca(ICC2/PI489777)SNP_23669 | 648  | G | A | 14 | 12 | -- | --   |
|            | Ca(ICC2/PI489777)SNP_23670 | 678  | T | C | 14 | 12 | -- | --   |
|            | Ca(ICC2/PI489777)SNP_23671 | 693  | A | G | 13 | 12 | -- | --   |
|            | Ca(ICC2/PI489777)SNP_23672 | 730  | A | G | 15 | 17 | -- | --   |
|            | Ca(ICC2/PI489777)SNP_23673 | 993  | C | T | 12 | 13 | -- | --   |
| CakTC37987 | Ca(ICC2/PI489777)SNP_23674 | 201  | T | G | 7  | 4  | -- | --   |
| CakTC34571 | Ca(ICC2/PI489777)SNP_23675 | 1831 | G | A | 8  | 5  | -- | --   |



|            |                             |      |   |   |    |    |        |      |
|------------|-----------------------------|------|---|---|----|----|--------|------|
| CakTC23703 | Ca(ICCV2/PI489777)SNP_23676 | 1695 | A | G | 10 | 5  | --     | --   |
| CakTC39738 | Ca(ICCV2/PI489777)SNP_23677 | 337  | C | T | 45 | 39 | --     | --   |
|            | Ca(ICCV2/PI489777)SNP_23678 | 1018 | A | G | 50 | 71 | --     | --   |
|            | Ca(ICCV2/PI489777)SNP_23679 | 1111 | G | C | 36 | 57 | --     | --   |
| CakTC38026 | Ca(ICCV2/PI489777)SNP_23680 | 217  | C | T | 7  | 3  | --     | --   |
|            | Ca(ICCV2/PI489777)SNP_23681 | 818  | A | T | 8  | 15 | --     | --   |
| CakTC24295 | Ca(ICCV2/PI489777)SNP_23682 | 140  | G | C | 21 | 14 | --     | --   |
|            | Ca(ICCV2/PI489777)SNP_23683 | 424  | G | T | 39 | 28 | --     | --   |
|            | Ca(ICCV2/PI489777)SNP_23684 | 853  | C | G | 25 | 32 | --     | --   |
|            | Ca(ICCV2/PI489777)SNP_23685 | 3428 | G | T | 11 | 4  | --     | --   |
| CakTC31093 | Ca(ICCV2/PI489777)SNP_23686 | 1150 | T | C | 4  | 4  | --     | --   |
|            | Ca(ICCV2/PI489777)SNP_23687 | 1230 | G | T | 5  | 4  | --     | --   |
| CakTC38471 | Ca(ICCV2/PI489777)SNP_23688 | 1369 | C | T | 9  | 7  | --     | --   |
| CakTC25818 | Ca(ICCV2/PI489777)SNP_23689 | 1489 | C | T | 10 | 3  | --     | --   |
|            | Ca(ICCV2/PI489777)SNP_23690 | 1516 | C | A | 3  | 3  | --     | --   |
|            | Ca(ICCV2/PI489777)SNP_23691 | 1522 | C | T | 4  | 3  | --     | --   |
| CakTC43017 | Ca(ICCV2/PI489777)SNP_23692 | 117  | T | C | 3  | 5  | --     | --   |
|            | Ca(ICCV2/PI489777)SNP_23693 | 325  | T | C | 4  | 5  | --     | --   |
|            | Ca(ICCV2/PI489777)SNP_23694 | 477  | T | G | 7  | 4  | --     | --   |
|            | Ca(ICCV2/PI489777)SNP_23695 | 1524 | A | C | 6  | 3  | --     | --   |
| CakTC40467 | Ca(ICCV2/PI489777)SNP_23696 | 82   | C | T | 12 | 17 | --     | --   |
| CakTC25999 | Ca(ICCV2/PI489777)SNP_23697 | 374  | A | G | 36 | 31 | --     | --   |
| CakTC27261 | Ca(ICCV2/PI489777)SNP_23698 | 180  | T | C | 19 | 5  | --     | --   |
|            | Ca(ICCV2/PI489777)SNP_23699 | 936  | C | T | 37 | 13 | --     | --   |
|            | Ca(ICCV2/PI489777)SNP_23700 | 1235 | G | A | 48 | 13 | --     | --   |
| CakTC29392 | Ca(ICCV2/PI489777)SNP_23701 | 870  | C | T | 3  | 3  | Flower | bud  |
| CakTC30521 | Ca(ICCV2/PI489777)SNP_23702 | 213  | T | A | 5  | 6  | --     | --   |
|            | Ca(ICCV2/PI489777)SNP_23703 | 1011 | T | C | 4  | 3  | --     | --   |
|            | Ca(ICCV2/PI489777)SNP_23704 | 2354 | G | A | 4  | 8  | --     | --   |
| CakTC36021 | Ca(ICCV2/PI489777)SNP_23705 | 487  | T | C | 5  | 7  | --     | --   |
|            | Ca(ICCV2/PI489777)SNP_23706 | 490  | C | T | 4  | 7  | --     | --   |
|            | Ca(ICCV2/PI489777)SNP_23707 | 1159 | T | C | 6  | 4  | --     | --   |
|            | Ca(ICCV2/PI489777)SNP_23708 | 1372 | G | A | 9  | 5  | --     | --   |
|            | Ca(ICCV2/PI489777)SNP_23709 | 1609 | A | G | 12 | 11 | --     | --   |
|            | Ca(ICCV2/PI489777)SNP_23710 | 2275 | C | T | 9  | 11 | --     | --   |
|            | Ca(ICCV2/PI489777)SNP_23711 | 2380 | G | A | 10 | 11 | --     | --   |
| CakTC25621 | Ca(ICCV2/PI489777)SNP_23712 | 1733 | A | T | 7  | 3  | --     | TCP  |
| CakTC35851 | Ca(ICCV2/PI489777)SNP_23713 | 473  | A | C | 11 | 14 | --     | --   |
|            | Ca(ICCV2/PI489777)SNP_23714 | 534  | C | T | 15 | 11 | --     | --   |
|            | Ca(ICCV2/PI489777)SNP_23715 | 908  | A | G | 37 | 17 | --     | --   |
|            | Ca(ICCV2/PI489777)SNP_23716 | 1343 | T | C | 21 | 9  | --     | --   |
|            | Ca(ICCV2/PI489777)SNP_23717 | 1997 | C | T | 27 | 8  | --     | --   |
|            | Ca(ICCV2/PI489777)SNP_23718 | 2157 | C | T | 17 | 3  | --     | --   |
|            | Ca(ICCV2/PI489777)SNP_23719 | 2164 | T | C | 14 | 3  | --     | --   |
|            | Ca(ICCV2/PI489777)SNP_23720 | 2300 | T | C | 10 | 4  | --     | --   |
|            | Ca(ICCV2/PI489777)SNP_23721 | 2635 | A | G | 13 | 7  | --     | --   |
| CakTC42040 | Ca(ICCV2/PI489777)SNP_23722 | 221  | G | T | 10 | 3  | --     | --   |
|            | Ca(ICCV2/PI489777)SNP_23723 | 555  | G | A | 8  | 5  | --     | --   |
|            | Ca(ICCV2/PI489777)SNP_23724 | 596  | A | C | 8  | 5  | --     | --   |
|            | Ca(ICCV2/PI489777)SNP_23725 | 598  | A | C | 7  | 5  | --     | --   |
|            | Ca(ICCV2/PI489777)SNP_23726 | 857  | A | G | 4  | 6  | --     | --   |
| CakTC25307 | Ca(ICCV2/PI489777)SNP_23727 | 711  | G | A | 30 | 33 | --     | --   |
| CakTC33695 | Ca(ICCV2/PI489777)SNP_23728 | 1920 | T | C | 5  | 5  | --     | BESI |
| CakTC28947 | Ca(ICCV2/PI489777)SNP_23729 | 228  | C | T | 25 | 9  | --     | --   |
| CakTC29694 | Ca(ICCV2/PI489777)SNP_23730 | 615  | C | A | 4  | 3  | --     | --   |
| CakTC37522 | Ca(ICCV2/PI489777)SNP_23731 | 115  | T | C | 11 | 4  | --     | --   |
|            | Ca(ICCV2/PI489777)SNP_23732 | 193  | A | C | 19 | 11 | --     | --   |
|            | Ca(ICCV2/PI489777)SNP_23733 | 456  | A | G | 33 | 28 | --     | --   |
|            | Ca(ICCV2/PI489777)SNP_23734 | 552  | A | C | 38 | 30 | --     | --   |
|            | Ca(ICCV2/PI489777)SNP_23735 | 763  | T | C | 42 | 31 | --     | --   |
|            | Ca(ICCV2/PI489777)SNP_23736 | 1529 | C | A | 24 | 3  | --     | --   |
| CakTC41934 | Ca(ICCV2/PI489777)SNP_23737 | 754  | A | G | 19 | 5  | --     | --   |
| CakTC42398 | Ca(ICCV2/PI489777)SNP_23738 | 226  | T | G | 4  | 13 | --     | --   |
|            | Ca(ICCV2/PI489777)SNP_23739 | 448  | G | T | 4  | 12 | --     | --   |
| CakTC41096 | Ca(ICCV2/PI489777)SNP_23740 | 80   | C | T | 12 | 6  | --     | --   |
|            | Ca(ICCV2/PI489777)SNP_23741 | 86   | T | C | 12 | 6  | --     | --   |
|            | Ca(ICCV2/PI489777)SNP_23742 | 109  | G | T | 12 | 6  | --     | --   |
|            | Ca(ICCV2/PI489777)SNP_23743 | 110  | T | C | 12 | 6  | --     | --   |
|            | Ca(ICCV2/PI489777)SNP_23744 | 288  | C | T | 13 | 6  | --     | --   |
| CakTC23507 | Ca(ICCV2/PI489777)SNP_23745 | 291  | A | G | 13 | 5  | --     | --   |
|            | Ca(ICCV2/PI489777)SNP_23746 | 555  | T | A | 18 | 8  | --     | --   |
| CakTC26585 | Ca(ICCV2/PI489777)SNP_23747 | 1099 | A | G | 3  | 9  | --     | --   |
| CakTC24894 | Ca(ICCV2/PI489777)SNP_23748 | 146  | C | A | 8  | 3  | --     | --   |
| CakTC28768 | Ca(ICCV2/PI489777)SNP_23749 | 241  | A | G | 32 | 30 | --     | --   |

|            |                             |      |   |   |     |    |           |           |
|------------|-----------------------------|------|---|---|-----|----|-----------|-----------|
| CakTC13057 | Ca(ICCV2/PI489777)SNP_23750 | 406  | A | T | 21  | 10 | --        | --        |
|            | Ca(ICCV2/PI489777)SNP_23751 | 589  | C | A | 5   | 3  | --        | --        |
| CakTC35325 | Ca(ICCV2/PI489777)SNP_23752 | 1689 | C | T | 18  | 4  | --        | --        |
|            | Ca(ICCV2/PI489777)SNP_23753 | 1999 | T | C | 23  | 7  | --        | --        |
|            | Ca(ICCV2/PI489777)SNP_23754 | 2101 | T | G | 28  | 9  | --        | --        |
|            | Ca(ICCV2/PI489777)SNP_23755 | 2182 | A | G | 20  | 8  | --        | --        |
|            | Ca(ICCV2/PI489777)SNP_23756 | 2774 | C | T | 28  | 17 | --        | --        |
| CakTC27221 | Ca(ICCV2/PI489777)SNP_23757 | 763  | T | C | 12  | 5  | --        | --        |
| CakTC40822 | Ca(ICCV2/PI489777)SNP_23758 | 258  | A | G | 5   | 3  | --        | --        |
| CakTC11011 | Ca(ICCV2/PI489777)SNP_23759 | 395  | C | T | 7   | 5  | --        | --        |
|            | Ca(ICCV2/PI489777)SNP_23760 | 632  | A | C | 6   | 7  | --        | --        |
| CakTC36527 | Ca(ICCV2/PI489777)SNP_23761 | 370  | A | T | 7   | 5  | --        | HB        |
|            | Ca(ICCV2/PI489777)SNP_23762 | 463  | A | G | 7   | 6  | --        | HB        |
|            | Ca(ICCV2/PI489777)SNP_23763 | 1136 | G | A | 5   | 6  | --        | HB        |
|            | Ca(ICCV2/PI489777)SNP_23764 | 1526 | C | T | 10  | 4  | --        | HB        |
|            | Ca(ICCV2/PI489777)SNP_23765 | 2045 | T | C | 8   | 3  | --        | HB        |
|            | Ca(ICCV2/PI489777)SNP_23766 | 2076 | G | A | 8   | 4  | --        | HB        |
|            | Ca(ICCV2/PI489777)SNP_23767 | 2525 | T | A | 8   | 3  | --        | HB        |
| CakTC23044 | Ca(ICCV2/PI489777)SNP_23768 | 4007 | G | A | 9   | 3  | --        | --        |
|            | Ca(ICCV2/PI489777)SNP_23769 | 4175 | G | A | 11  | 3  | --        | --        |
|            | Ca(ICCV2/PI489777)SNP_23770 | 5017 | G | A | 8   | 4  | --        | --        |
| CakTC40109 | Ca(ICCV2/PI489777)SNP_23771 | 317  | C | T | 17  | 19 | --        | --        |
|            | Ca(ICCV2/PI489777)SNP_23772 | 1049 | G | A | 22  | 32 | --        | --        |
|            | Ca(ICCV2/PI489777)SNP_23773 | 1293 | A | G | 22  | 35 | --        | --        |
|            | Ca(ICCV2/PI489777)SNP_23774 | 1337 | A | G | 20  | 21 | --        | --        |
|            | Ca(ICCV2/PI489777)SNP_23775 | 1430 | G | C | 19  | 26 | --        | --        |
| CakTC40608 | Ca(ICCV2/PI489777)SNP_23776 | 338  | T | C | 22  | 4  | --        | --        |
|            | Ca(ICCV2/PI489777)SNP_23777 | 565  | A | T | 26  | 4  | --        | --        |
|            | Ca(ICCV2/PI489777)SNP_23778 | 633  | C | T | 25  | 3  | --        | --        |
|            | Ca(ICCV2/PI489777)SNP_23779 | 662  | G | T | 23  | 3  | --        | --        |
|            | Ca(ICCV2/PI489777)SNP_23780 | 703  | T | A | 21  | 4  | --        | --        |
|            | Ca(ICCV2/PI489777)SNP_23781 | 810  | C | T | 17  | 4  | --        | --        |
| CakTC29291 | Ca(ICCV2/PI489777)SNP_23782 | 1724 | T | C | 14  | 3  | Shoot     | --        |
| CakTC09673 | Ca(ICCV2/PI489777)SNP_23783 | 1086 | C | G | 7   | 3  | --        | --        |
| CakTC12524 | Ca(ICCV2/PI489777)SNP_23784 | 214  | T | C | 17  | 4  | --        | --        |
| CakTC34744 | Ca(ICCV2/PI489777)SNP_23785 | 51   | T | C | 4   | 6  | --        | --        |
|            | Ca(ICCV2/PI489777)SNP_23786 | 2194 | G | A | 11  | 19 | --        | --        |
| CakTC31472 | Ca(ICCV2/PI489777)SNP_23787 | 1477 | A | G | 8   | 6  | --        | --        |
|            | Ca(ICCV2/PI489777)SNP_23788 | 1631 | T | C | 11  | 3  | --        | --        |
| CakTC10596 | Ca(ICCV2/PI489777)SNP_23789 | 170  | C | A | 3   | 3  | --        | WRKY      |
|            | Ca(ICCV2/PI489777)SNP_23790 | 252  | A | G | 5   | 3  | --        | WRKY      |
|            | Ca(ICCV2/PI489777)SNP_23791 | 499  | C | T | 10  | 4  | --        | WRKY      |
|            | Ca(ICCV2/PI489777)SNP_23792 | 568  | C | T | 11  | 5  | --        | WRKY      |
| CakTC26938 | Ca(ICCV2/PI489777)SNP_23793 | 1396 | G | T | 23  | 7  | --        | --        |
|            | Ca(ICCV2/PI489777)SNP_23794 | 2116 | C | T | 13  | 8  | --        | --        |
|            | Ca(ICCV2/PI489777)SNP_23795 | 2588 | A | G | 14  | 7  | --        | --        |
|            | Ca(ICCV2/PI489777)SNP_23796 | 2693 | G | T | 12  | 7  | --        | --        |
|            | Ca(ICCV2/PI489777)SNP_23797 | 3566 | C | A | 22  | 7  | --        | --        |
|            | Ca(ICCV2/PI489777)SNP_23798 | 4710 | A | G | 21  | 11 | --        | --        |
|            | Ca(ICCV2/PI489777)SNP_23799 | 5524 | G | A | 32  | 20 | --        | --        |
|            | Ca(ICCV2/PI489777)SNP_23800 | 5677 | G | A | 29  | 12 | --        | --        |
|            | Ca(ICCV2/PI489777)SNP_23801 | 5822 | G | A | 17  | 7  | --        | --        |
|            | Ca(ICCV2/PI489777)SNP_23802 | 5903 | C | T | 17  | 8  | --        | --        |
| CakTC16127 | Ca(ICCV2/PI489777)SNP_23803 | 260  | A | G | 3   | 5  | --        | --        |
|            | Ca(ICCV2/PI489777)SNP_23804 | 277  | G | A | 3   | 5  | --        | --        |
|            | Ca(ICCV2/PI489777)SNP_23805 | 378  | T | C | 3   | 5  | --        | --        |
|            | Ca(ICCV2/PI489777)SNP_23806 | 409  | T | C | 3   | 5  | --        | --        |
| CakTC39529 | Ca(ICCV2/PI489777)SNP_23807 | 239  | A | C | 101 | 67 | --        | AP2-EREBP |
|            | Ca(ICCV2/PI489777)SNP_23808 | 1056 | C | T | 158 | 68 | --        | AP2-EREBP |
|            | Ca(ICCV2/PI489777)SNP_23809 | 1068 | T | G | 154 | 73 | --        | AP2-EREBP |
| CakTC40195 | Ca(ICCV2/PI489777)SNP_23810 | 157  | G | A | 5   | 6  | --        | --        |
|            | Ca(ICCV2/PI489777)SNP_23811 | 304  | T | C | 10  | 8  | --        | --        |
|            | Ca(ICCV2/PI489777)SNP_23812 | 901  | C | A | 7   | 4  | --        | --        |
| CakTC35166 | Ca(ICCV2/PI489777)SNP_23813 | 2840 | G | C | 4   | 4  | --        | --        |
|            | Ca(ICCV2/PI489777)SNP_23814 | 2870 | G | A | 4   | 5  | --        | --        |
| CakTC10466 | Ca(ICCV2/PI489777)SNP_23815 | 434  | C | T | 35  | 50 | --        | --        |
|            | Ca(ICCV2/PI489777)SNP_23816 | 587  | C | T | 22  | 37 | --        | --        |
|            | Ca(ICCV2/PI489777)SNP_23817 | 593  | A | T | 19  | 22 | --        | --        |
|            | Ca(ICCV2/PI489777)SNP_23818 | 629  | C | T | 13  | 24 | --        | --        |
|            | Ca(ICCV2/PI489777)SNP_23819 | 641  | T | C | 11  | 24 | --        | --        |
| CakTC40251 | Ca(ICCV2/PI489777)SNP_23820 | 267  | A | T | 17  | 7  | --        | --        |
|            | Ca(ICCV2/PI489777)SNP_23821 | 551  | A | T | 8   | 9  | --        | --        |
| CakTC33759 | Ca(ICCV2/PI489777)SNP_23822 | 276  | C | G | 7   | 9  | --        | --        |
| CakTC33503 | Ca(ICCV2/PI489777)SNP_23823 | 1843 | A | C | 7   | 11 | Young_pod | --        |

|            |                            |      |   |   |     |    |        |      |
|------------|----------------------------|------|---|---|-----|----|--------|------|
| CakTC05173 | Ca(ICC2/PI489777)SNP_23824 | 1226 | A | G | 5   | 4  | --     | --   |
| CakTC37021 | Ca(ICC2/PI489777)SNP_23825 | 78   | C | T | 114 | 17 | --     | --   |
|            | Ca(ICC2/PI489777)SNP_23826 | 87   | C | T | 114 | 17 | --     | --   |
|            | Ca(ICC2/PI489777)SNP_23827 | 258  | C | A | 114 | 10 | --     | --   |
|            | Ca(ICC2/PI489777)SNP_23828 | 357  | A | T | 101 | 14 | --     | --   |
| CakTC40297 | Ca(ICC2/PI489777)SNP_23829 | 375  | G | A | 6   | 6  | --     | --   |
|            | Ca(ICC2/PI489777)SNP_23830 | 435  | C | T | 9   | 5  | --     | --   |
|            | Ca(ICC2/PI489777)SNP_23831 | 444  | A | G | 9   | 5  | --     | --   |
| CakTC07791 | Ca(ICC2/PI489777)SNP_23832 | 312  | G | T | 5   | 3  | Root   | --   |
| CakTC25102 | Ca(ICC2/PI489777)SNP_23833 | 142  | G | C | 18  | 5  | --     | --   |
|            | Ca(ICC2/PI489777)SNP_23834 | 667  | G | A | 11  | 6  | --     | --   |
|            | Ca(ICC2/PI489777)SNP_23835 | 1113 | T | C | 13  | 3  | --     | --   |
|            | Ca(ICC2/PI489777)SNP_23836 | 1427 | C | T | 36  | 9  | --     | --   |
|            | Ca(ICC2/PI489777)SNP_23837 | 1428 | G | A | 36  | 9  | --     | --   |
|            | Ca(ICC2/PI489777)SNP_23838 | 1464 | C | T | 44  | 9  | --     | --   |
| CakTC23871 | Ca(ICC2/PI489777)SNP_23839 | 335  | T | G | 7   | 3  | --     | --   |
|            | Ca(ICC2/PI489777)SNP_23840 | 1803 | T | C | 4   | 13 | --     | --   |
|            | Ca(ICC2/PI489777)SNP_23841 | 2732 | C | T | 36  | 23 | --     | --   |
|            | Ca(ICC2/PI489777)SNP_23842 | 2744 | T | C | 32  | 24 | --     | --   |
|            | Ca(ICC2/PI489777)SNP_23843 | 2791 | T | C | 36  | 23 | --     | --   |
|            | Ca(ICC2/PI489777)SNP_23844 | 2843 | G | A | 37  | 21 | --     | --   |
|            | Ca(ICC2/PI489777)SNP_23845 | 3011 | T | C | 26  | 6  | --     | --   |
|            | Ca(ICC2/PI489777)SNP_23846 | 3018 | G | A | 25  | 7  | --     | --   |
|            | Ca(ICC2/PI489777)SNP_23847 | 3026 | A | C | 27  | 6  | --     | --   |
| CakTC00221 | Ca(ICC2/PI489777)SNP_23848 | 358  | A | G | 3   | 6  | --     | --   |
| CakTC38175 | Ca(ICC2/PI489777)SNP_23849 | 1406 | C | A | 10  | 9  | --     | --   |
| CakTC26672 | Ca(ICC2/PI489777)SNP_23850 | 1983 | G | C | 7   | 4  | --     | --   |
| CakTC41052 | Ca(ICC2/PI489777)SNP_23851 | 434  | C | T | 20  | 9  | --     | --   |
|            | Ca(ICC2/PI489777)SNP_23852 | 638  | T | G | 17  | 6  | --     | --   |
|            | Ca(ICC2/PI489777)SNP_23853 | 641  | A | G | 17  | 6  | --     | --   |
|            | Ca(ICC2/PI489777)SNP_23854 | 653  | G | A | 16  | 6  | --     | --   |
| CakTC38944 | Ca(ICC2/PI489777)SNP_23855 | 295  | C | T | 22  | 6  | --     | --   |
|            | Ca(ICC2/PI489777)SNP_23856 | 391  | C | T | 15  | 6  | --     | --   |
|            | Ca(ICC2/PI489777)SNP_23857 | 484  | G | T | 8   | 8  | --     | --   |
|            | Ca(ICC2/PI489777)SNP_23858 | 649  | G | A | 10  | 10 | --     | --   |
|            | Ca(ICC2/PI489777)SNP_23859 | 754  | T | G | 10  | 11 | --     | --   |
|            | Ca(ICC2/PI489777)SNP_23860 | 1048 | T | C | 19  | 7  | --     | --   |
|            | Ca(ICC2/PI489777)SNP_23861 | 1159 | G | A | 17  | 4  | --     | --   |
|            | Ca(ICC2/PI489777)SNP_23862 | 1306 | G | A | 10  | 3  | --     | --   |
| CakTC27344 | Ca(ICC2/PI489777)SNP_23863 | 818  | G | A | 10  | 5  | --     | --   |
|            | Ca(ICC2/PI489777)SNP_23864 | 1001 | G | A | 18  | 8  | --     | --   |
|            | Ca(ICC2/PI489777)SNP_23865 | 1103 | A | G | 13  | 32 | --     | --   |
|            | Ca(ICC2/PI489777)SNP_23866 | 1221 | G | A | 18  | 41 | --     | --   |
|            | Ca(ICC2/PI489777)SNP_23867 | 1229 | T | C | 16  | 43 | --     | --   |
|            | Ca(ICC2/PI489777)SNP_23868 | 1232 | T | C | 14  | 42 | --     | --   |
|            | Ca(ICC2/PI489777)SNP_23869 | 1344 | A | G | 15  | 44 | --     | --   |
|            | Ca(ICC2/PI489777)SNP_23870 | 1482 | A | G | 11  | 28 | --     | --   |
|            | Ca(ICC2/PI489777)SNP_23871 | 1661 | T | C | 3   | 6  | --     | --   |
| CakTC36759 | Ca(ICC2/PI489777)SNP_23872 | 815  | G | T | 3   | 4  | Flower | bud  |
| CakTC42716 | Ca(ICC2/PI489777)SNP_23873 | 41   | G | A | 3   | 3  | --     | --   |
|            | Ca(ICC2/PI489777)SNP_23874 | 592  | G | A | 20  | 13 | --     | --   |
| CakTC23307 | Ca(ICC2/PI489777)SNP_23875 | 765  | C | G | 6   | 10 | --     | --   |
| CakTC41196 | Ca(ICC2/PI489777)SNP_23876 | 99   | C | T | 7   | 13 | --     | --   |
|            | Ca(ICC2/PI489777)SNP_23877 | 181  | G | A | 13  | 56 | --     | --   |
| CakTC41652 | Ca(ICC2/PI489777)SNP_23878 | 608  | G | T | 4   | 3  | --     | --   |
| CakTC34516 | Ca(ICC2/PI489777)SNP_23879 | 904  | T | A | 6   | 4  | --     | --   |
|            | Ca(ICC2/PI489777)SNP_23880 | 1189 | C | T | 12  | 6  | --     | --   |
| CakTC00503 | Ca(ICC2/PI489777)SNP_23881 | 1450 | G | A | 3   | 9  | --     | --   |
| CakTC37722 | Ca(ICC2/PI489777)SNP_23882 | 358  | T | A | 7   | 8  | --     | --   |
|            | Ca(ICC2/PI489777)SNP_23883 | 572  | T | C | 10  | 5  | --     | --   |
| CakTC26829 | Ca(ICC2/PI489777)SNP_23884 | 161  | T | G | 14  | 3  | --     | --   |
|            | Ca(ICC2/PI489777)SNP_23885 | 392  | A | G | 22  | 9  | --     | --   |
| CakTC12384 | Ca(ICC2/PI489777)SNP_23886 | 1722 | T | C | 6   | 3  | --     | --   |
|            | Ca(ICC2/PI489777)SNP_23887 | 1827 | G | C | 7   | 4  | --     | --   |
|            | Ca(ICC2/PI489777)SNP_23888 | 1893 | T | C | 9   | 7  | --     | --   |
|            | Ca(ICC2/PI489777)SNP_23889 | 2105 | G | A | 13  | 6  | --     | --   |
| CakTC30807 | Ca(ICC2/PI489777)SNP_23890 | 970  | T | C | 7   | 5  | --     | --   |
| CakTC39932 | Ca(ICC2/PI489777)SNP_23891 | 1040 | A | C | 8   | 5  | --     | --   |
|            | Ca(ICC2/PI489777)SNP_23892 | 1265 | T | C | 9   | 6  | --     | --   |
| CakTC34113 | Ca(ICC2/PI489777)SNP_23893 | 438  | A | G | 29  | 8  | --     | bZIP |
|            | Ca(ICC2/PI489777)SNP_23894 | 867  | A | G | 30  | 14 | --     | bZIP |
|            | Ca(ICC2/PI489777)SNP_23895 | 1062 | A | G | 29  | 9  | --     | bZIP |
|            | Ca(ICC2/PI489777)SNP_23896 | 1107 | C | T | 27  | 8  | --     | bZIP |
|            | Ca(ICC2/PI489777)SNP_23897 | 1127 | T | C | 27  | 6  | --     | bZIP |

|            |                             |      |   |   |    |    |       |       |
|------------|-----------------------------|------|---|---|----|----|-------|-------|
|            | Ca(ICCV2/PI489777)SNP_23898 | 1299 | C | T | 13 | 7  | --    | bZIP  |
|            | Ca(ICCV2/PI489777)SNP_23899 | 1349 | C | T | 10 | 9  | --    | bZIP  |
|            | Ca(ICCV2/PI489777)SNP_23900 | 2010 | A | G | 25 | 6  | --    | bZIP  |
|            | Ca(ICCV2/PI489777)SNP_23901 | 2036 | A | G | 21 | 6  | --    | bZIP  |
| CakTC26979 | Ca(ICCV2/PI489777)SNP_23902 | 337  | C | T | 5  | 8  | --    | bZIP  |
|            | Ca(ICCV2/PI489777)SNP_23903 | 511  | T | C | 12 | 14 | --    | bZIP  |
|            | Ca(ICCV2/PI489777)SNP_23904 | 1133 | A | G | 13 | 14 | --    | bZIP  |
|            | Ca(ICCV2/PI489777)SNP_23905 | 1204 | T | A | 11 | 10 | --    | bZIP  |
| CakTC26517 | Ca(ICCV2/PI489777)SNP_23906 | 1924 | C | A | 5  | 4  | --    | --    |
|            | Ca(ICCV2/PI489777)SNP_23907 | 2351 | G | A | 4  | 3  | --    | --    |
| CakTC29850 | Ca(ICCV2/PI489777)SNP_23908 | 418  | G | C | 5  | 8  | Shoot | --    |
|            | Ca(ICCV2/PI489777)SNP_23909 | 482  | C | T | 6  | 8  | Shoot | --    |
|            | Ca(ICCV2/PI489777)SNP_23910 | 523  | G | A | 6  | 8  | Shoot | --    |
|            | Ca(ICCV2/PI489777)SNP_23911 | 582  | G | C | 6  | 5  | Shoot | --    |
|            | Ca(ICCV2/PI489777)SNP_23912 | 751  | G | A | 6  | 3  | Shoot | --    |
|            | Ca(ICCV2/PI489777)SNP_23913 | 1439 | A | T | 10 | 6  | Shoot | --    |
|            | Ca(ICCV2/PI489777)SNP_23914 | 2192 | G | T | 3  | 7  | Shoot | --    |
|            | Ca(ICCV2/PI489777)SNP_23915 | 2324 | G | A | 4  | 6  | Shoot | --    |
| CakTC11379 | Ca(ICCV2/PI489777)SNP_23916 | 1270 | G | A | 32 | 8  | --    | --    |
| CakTC38870 | Ca(ICCV2/PI489777)SNP_23917 | 558  | A | G | 6  | 5  | --    | --    |
|            | Ca(ICCV2/PI489777)SNP_23918 | 559  | G | T | 6  | 5  | --    | --    |
|            | Ca(ICCV2/PI489777)SNP_23919 | 608  | T | C | 6  | 5  | --    | --    |
|            | Ca(ICCV2/PI489777)SNP_23920 | 1080 | C | T | 6  | 3  | --    | --    |
| CakTC32065 | Ca(ICCV2/PI489777)SNP_23921 | 1183 | A | G | 14 | 7  | --    | PLATZ |
| CakTC25865 | Ca(ICCV2/PI489777)SNP_23922 | 391  | A | G | 26 | 12 | --    | --    |
|            | Ca(ICCV2/PI489777)SNP_23923 | 654  | T | A | 10 | 8  | --    | --    |
| CakTC09793 | Ca(ICCV2/PI489777)SNP_23924 | 1206 | T | C | 12 | 6  | --    | --    |
|            | Ca(ICCV2/PI489777)SNP_23925 | 2640 | T | C | 12 | 3  | --    | --    |
|            | Ca(ICCV2/PI489777)SNP_23926 | 2811 | C | T | 12 | 4  | --    | --    |
|            | Ca(ICCV2/PI489777)SNP_23927 | 3039 | G | T | 6  | 5  | --    | --    |
|            | Ca(ICCV2/PI489777)SNP_23928 | 3610 | A | G | 12 | 4  | --    | --    |
|            | Ca(ICCV2/PI489777)SNP_23929 | 4656 | A | G | 14 | 3  | --    | --    |
|            | Ca(ICCV2/PI489777)SNP_23930 | 4737 | G | T | 16 | 4  | --    | --    |
|            | Ca(ICCV2/PI489777)SNP_23931 | 5298 | A | G | 17 | 6  | --    | --    |
|            | Ca(ICCV2/PI489777)SNP_23932 | 5426 | C | T | 16 | 4  | --    | --    |
|            | Ca(ICCV2/PI489777)SNP_23933 | 5445 | G | A | 16 | 4  | --    | --    |
| CakTC12403 | Ca(ICCV2/PI489777)SNP_23934 | 1057 | A | C | 5  | 3  | --    | --    |
| CakTC11944 | Ca(ICCV2/PI489777)SNP_23935 | 75   | G | A | 5  | 5  | --    | --    |
|            | Ca(ICCV2/PI489777)SNP_23936 | 370  | A | C | 7  | 6  | --    | --    |
|            | Ca(ICCV2/PI489777)SNP_23937 | 376  | A | C | 3  | 7  | --    | --    |
|            | Ca(ICCV2/PI489777)SNP_23938 | 471  | G | T | 7  | 3  | --    | --    |
| CakTC23633 | Ca(ICCV2/PI489777)SNP_23939 | 151  | C | T | 9  | 5  | --    | --    |
|            | Ca(ICCV2/PI489777)SNP_23940 | 460  | G | C | 15 | 5  | --    | --    |
|            | Ca(ICCV2/PI489777)SNP_23941 | 686  | A | G | 14 | 22 | --    | --    |
|            | Ca(ICCV2/PI489777)SNP_23942 | 1210 | C | A | 10 | 3  | --    | --    |
|            | Ca(ICCV2/PI489777)SNP_23943 | 1217 | T | C | 11 | 3  | --    | --    |
|            | Ca(ICCV2/PI489777)SNP_23944 | 1227 | C | A | 11 | 3  | --    | --    |
| CakTC41986 | Ca(ICCV2/PI489777)SNP_23945 | 406  | T | C | 18 | 15 | --    | --    |
| CakTC34388 | Ca(ICCV2/PI489777)SNP_23946 | 631  | G | A | 23 | 9  | --    | --    |
|            | Ca(ICCV2/PI489777)SNP_23947 | 743  | G | A | 27 | 10 | --    | --    |
|            | Ca(ICCV2/PI489777)SNP_23948 | 751  | T | C | 27 | 10 | --    | --    |
|            | Ca(ICCV2/PI489777)SNP_23949 | 793  | T | C | 28 | 10 | --    | --    |
|            | Ca(ICCV2/PI489777)SNP_23950 | 1033 | T | G | 22 | 4  | --    | --    |
|            | Ca(ICCV2/PI489777)SNP_23951 | 1123 | A | G | 30 | 6  | --    | --    |
| CakTC24403 | Ca(ICCV2/PI489777)SNP_23952 | 182  | A | G | 7  | 6  | --    | --    |
|            | Ca(ICCV2/PI489777)SNP_23953 | 534  | T | C | 23 | 9  | --    | --    |
|            | Ca(ICCV2/PI489777)SNP_23954 | 729  | A | T | 22 | 6  | --    | --    |
|            | Ca(ICCV2/PI489777)SNP_23955 | 948  | A | G | 26 | 12 | --    | --    |
|            | Ca(ICCV2/PI489777)SNP_23956 | 1407 | C | T | 18 | 10 | --    | --    |
|            | Ca(ICCV2/PI489777)SNP_23957 | 1410 | G | T | 19 | 9  | --    | --    |
|            | Ca(ICCV2/PI489777)SNP_23958 | 1755 | T | C | 23 | 13 | --    | --    |
|            | Ca(ICCV2/PI489777)SNP_23959 | 2017 | C | G | 13 | 7  | --    | --    |
|            | Ca(ICCV2/PI489777)SNP_23960 | 2390 | T | C | 29 | 15 | --    | --    |
|            | Ca(ICCV2/PI489777)SNP_23961 | 2508 | T | C | 27 | 17 | --    | --    |
|            | Ca(ICCV2/PI489777)SNP_23962 | 2590 | C | A | 38 | 20 | --    | --    |
|            | Ca(ICCV2/PI489777)SNP_23963 | 2706 | C | T | 38 | 24 | --    | --    |
|            | Ca(ICCV2/PI489777)SNP_23964 | 2790 | C | T | 55 | 27 | --    | --    |
|            | Ca(ICCV2/PI489777)SNP_23965 | 3002 | A | G | 31 | 21 | --    | --    |
|            | Ca(ICCV2/PI489777)SNP_23966 | 3003 | A | C | 31 | 21 | --    | --    |
|            | Ca(ICCV2/PI489777)SNP_23967 | 3033 | A | G | 31 | 18 | --    | --    |
|            | Ca(ICCV2/PI489777)SNP_23968 | 3117 | A | G | 24 | 19 | --    | --    |
|            | Ca(ICCV2/PI489777)SNP_23969 | 3120 | A | G | 23 | 18 | --    | --    |
|            | Ca(ICCV2/PI489777)SNP_23970 | 3272 | C | T | 25 | 15 | --    | --    |
|            | Ca(ICCV2/PI489777)SNP_23971 | 3345 | T | C | 21 | 11 | --    | --    |

|            |                            |      |   |   |    |    |    |          |
|------------|----------------------------|------|---|---|----|----|----|----------|
|            | Ca(ICC2/PI489777)SNP_23972 | 3480 | A | G | 14 | 8  | -- | --       |
|            | Ca(ICC2/PI489777)SNP_23973 | 3578 | G | T | 6  | 8  | -- | --       |
|            | Ca(ICC2/PI489777)SNP_23974 | 3585 | C | T | 7  | 8  | -- | --       |
|            | Ca(ICC2/PI489777)SNP_23975 | 3744 | A | G | 8  | 6  | -- | --       |
|            | Ca(ICC2/PI489777)SNP_23976 | 3769 | A | G | 8  | 5  | -- | --       |
|            | Ca(ICC2/PI489777)SNP_23977 | 3809 | A | G | 7  | 5  | -- | --       |
| CakTC39157 | Ca(ICC2/PI489777)SNP_23978 | 392  | G | C | 3  | 4  | -- | Trihelix |
| CakTC25934 | Ca(ICC2/PI489777)SNP_23979 | 97   | G | A | 34 | 6  | -- | --       |
|            | Ca(ICC2/PI489777)SNP_23980 | 585  | C | T | 71 | 36 | -- | --       |
|            | Ca(ICC2/PI489777)SNP_23981 | 983  | C | T | 79 | 22 | -- | --       |
|            | Ca(ICC2/PI489777)SNP_23982 | 1649 | T | C | 53 | 20 | -- | --       |
|            | Ca(ICC2/PI489777)SNP_23983 | 1862 | G | T | 49 | 22 | -- | --       |
|            | Ca(ICC2/PI489777)SNP_23984 | 1912 | T | C | 50 | 20 | -- | --       |
| CakTC37263 | Ca(ICC2/PI489777)SNP_23985 | 178  | C | G | 7  | 3  | -- | --       |
|            | Ca(ICC2/PI489777)SNP_23986 | 445  | G | A | 17 | 5  | -- | --       |
|            | Ca(ICC2/PI489777)SNP_23987 | 565  | G | A | 18 | 4  | -- | --       |
| CakTC24530 | Ca(ICC2/PI489777)SNP_23988 | 1770 | G | T | 11 | 3  | -- | --       |
| CakTC33376 | Ca(ICC2/PI489777)SNP_23989 | 353  | T | G | 3  | 6  | -- | --       |
| CakTC28743 | Ca(ICC2/PI489777)SNP_23990 | 161  | G | A | 3  | 3  | -- | C2C2-Dof |
|            | Ca(ICC2/PI489777)SNP_23991 | 604  | A | T | 3  | 4  | -- | C2C2-Dof |
| CakTC23170 | Ca(ICC2/PI489777)SNP_23992 | 1096 | T | G | 3  | 7  | -- | --       |
|            | Ca(ICC2/PI489777)SNP_23993 | 1239 | T | A | 5  | 4  | -- | --       |
| CakTC23439 | Ca(ICC2/PI489777)SNP_23994 | 3184 | C | T | 34 | 20 | -- | --       |
|            | Ca(ICC2/PI489777)SNP_23995 | 4218 | T | A | 6  | 3  | -- | --       |
| CakTC06605 | Ca(ICC2/PI489777)SNP_23996 | 194  | G | C | 3  | 3  | -- | --       |
|            | Ca(ICC2/PI489777)SNP_23997 | 983  | A | G | 3  | 3  | -- | --       |
|            | Ca(ICC2/PI489777)SNP_23998 | 1133 | C | T | 4  | 3  | -- | --       |
|            | Ca(ICC2/PI489777)SNP_23999 | 1415 | C | A | 4  | 6  | -- | --       |
|            | Ca(ICC2/PI489777)SNP_24000 | 1512 | A | C | 4  | 6  | -- | --       |
| CakTC36739 | Ca(ICC2/PI489777)SNP_24001 | 1034 | A | C | 11 | 10 | -- | --       |
|            | Ca(ICC2/PI489777)SNP_24002 | 2174 | T | C | 19 | 12 | -- | --       |
| CakTC41503 | Ca(ICC2/PI489777)SNP_24003 | 252  | C | T | 17 | 5  | -- | HMG      |
|            | Ca(ICC2/PI489777)SNP_24004 | 807  | C | T | 13 | 7  | -- | HMG      |
| CakTC08793 | Ca(ICC2/PI489777)SNP_24005 | 665  | T | C | 6  | 3  | -- | --       |
|            | Ca(ICC2/PI489777)SNP_24006 | 1414 | C | A | 5  | 4  | -- | --       |
| CakTC38705 | Ca(ICC2/PI489777)SNP_24007 | 829  | G | A | 4  | 9  | -- | --       |
|            | Ca(ICC2/PI489777)SNP_24008 | 981  | G | A | 11 | 7  | -- | --       |
|            | Ca(ICC2/PI489777)SNP_24009 | 1020 | C | A | 14 | 4  | -- | --       |
| CakTC41668 | Ca(ICC2/PI489777)SNP_24010 | 1857 | A | G | 46 | 18 | -- | --       |
|            | Ca(ICC2/PI489777)SNP_24011 | 2141 | A | T | 20 | 16 | -- | --       |
| CakTC36853 | Ca(ICC2/PI489777)SNP_24012 | 458  | G | A | 4  | 11 | -- | --       |
|            | Ca(ICC2/PI489777)SNP_24013 | 1877 | C | T | 25 | 14 | -- | --       |
| CakTC42670 | Ca(ICC2/PI489777)SNP_24014 | 875  | G | A | 8  | 11 | -- | --       |
|            | Ca(ICC2/PI489777)SNP_24015 | 878  | C | T | 9  | 11 | -- | --       |
|            | Ca(ICC2/PI489777)SNP_24016 | 1469 | G | T | 11 | 3  | -- | --       |
|            | Ca(ICC2/PI489777)SNP_24017 | 1760 | G | A | 6  | 4  | -- | --       |
| CakTC40727 | Ca(ICC2/PI489777)SNP_24018 | 228  | C | G | 8  | 6  | -- | --       |
|            | Ca(ICC2/PI489777)SNP_24019 | 235  | G | T | 8  | 5  | -- | --       |
|            | Ca(ICC2/PI489777)SNP_24020 | 544  | A | G | 8  | 7  | -- | --       |
|            | Ca(ICC2/PI489777)SNP_24021 | 626  | T | A | 8  | 4  | -- | --       |
|            | Ca(ICC2/PI489777)SNP_24022 | 661  | C | T | 9  | 5  | -- | --       |
|            | Ca(ICC2/PI489777)SNP_24023 | 669  | T | C | 8  | 5  | -- | --       |
| CakTC29359 | Ca(ICC2/PI489777)SNP_24024 | 167  | G | A | 12 | 4  | -- | bHLH     |
|            | Ca(ICC2/PI489777)SNP_24025 | 772  | T | C | 7  | 8  | -- | bHLH     |
|            | Ca(ICC2/PI489777)SNP_24026 | 881  | A | G | 8  | 10 | -- | bHLH     |
|            | Ca(ICC2/PI489777)SNP_24027 | 963  | T | A | 9  | 11 | -- | bHLH     |
|            | Ca(ICC2/PI489777)SNP_24028 | 968  | A | G | 8  | 11 | -- | bHLH     |
| CakTC32623 | Ca(ICC2/PI489777)SNP_24029 | 424  | G | A | 50 | 7  | -- | --       |
|            | Ca(ICC2/PI489777)SNP_24030 | 1220 | G | T | 31 | 19 | -- | --       |
| CakTC18021 | Ca(ICC2/PI489777)SNP_24031 | 391  | C | T | 7  | 3  | -- | --       |
|            | Ca(ICC2/PI489777)SNP_24032 | 1422 | A | G | 7  | 5  | -- | --       |
|            | Ca(ICC2/PI489777)SNP_24033 | 1463 | C | T | 6  | 5  | -- | --       |
|            | Ca(ICC2/PI489777)SNP_24034 | 1901 | A | G | 7  | 4  | -- | --       |
|            | Ca(ICC2/PI489777)SNP_24035 | 1909 | C | G | 7  | 4  | -- | --       |
| CakTC35410 | Ca(ICC2/PI489777)SNP_24036 | 665  | A | C | 8  | 6  | -- | --       |
|            | Ca(ICC2/PI489777)SNP_24037 | 739  | G | A | 12 | 8  | -- | --       |
|            | Ca(ICC2/PI489777)SNP_24038 | 851  | A | G | 14 | 5  | -- | --       |
|            | Ca(ICC2/PI489777)SNP_24039 | 1265 | A | G | 12 | 5  | -- | --       |
|            | Ca(ICC2/PI489777)SNP_24040 | 2145 | G | T | 17 | 5  | -- | --       |
|            | Ca(ICC2/PI489777)SNP_24041 | 2764 | G | C | 19 | 10 | -- | --       |
|            | Ca(ICC2/PI489777)SNP_24042 | 2860 | C | G | 17 | 10 | -- | --       |
| CakTC37541 | Ca(ICC2/PI489777)SNP_24043 | 910  | G | C | 49 | 20 | -- | NAC      |
| CakTC16500 | Ca(ICC2/PI489777)SNP_24044 | 2179 | C | T | 4  | 3  | -- | --       |
|            | Ca(ICC2/PI489777)SNP_24045 | 2231 | C | T | 3  | 3  | -- | --       |

|            |                            |      |   |   |    |    |       |     |
|------------|----------------------------|------|---|---|----|----|-------|-----|
| CakTC36485 | Ca(ICC2/PI489777)SNP_24046 | 1294 | G | A | 5  | 4  | --    | --  |
|            | Ca(ICC2/PI489777)SNP_24047 | 1465 | G | A | 10 | 10 | --    | --  |
|            | Ca(ICC2/PI489777)SNP_24048 | 2035 | C | T | 9  | 7  | --    | --  |
|            | Ca(ICC2/PI489777)SNP_24049 | 2338 | T | C | 11 | 6  | --    | --  |
|            | Ca(ICC2/PI489777)SNP_24050 | 2575 | T | C | 13 | 7  | --    | --  |
|            | Ca(ICC2/PI489777)SNP_24051 | 2866 | A | G | 10 | 8  | --    | --  |
| CakTC41458 | Ca(ICC2/PI489777)SNP_24052 | 596  | G | A | 15 | 4  | --    | --  |
|            | Ca(ICC2/PI489777)SNP_24053 | 1486 | A | G | 9  | 4  | --    | --  |
| CakTC11215 | Ca(ICC2/PI489777)SNP_24054 | 199  | C | G | 3  | 3  | --    | --  |
| CakTC08851 | Ca(ICC2/PI489777)SNP_24055 | 238  | T | A | 17 | 7  | --    | --  |
|            | Ca(ICC2/PI489777)SNP_24056 | 259  | A | G | 19 | 9  | --    | --  |
|            | Ca(ICC2/PI489777)SNP_24057 | 409  | G | C | 36 | 18 | --    | --  |
|            | Ca(ICC2/PI489777)SNP_24058 | 448  | A | T | 40 | 27 | --    | --  |
|            | Ca(ICC2/PI489777)SNP_24059 | 962  | G | T | 9  | 12 | --    | --  |
| CakTC26499 | Ca(ICC2/PI489777)SNP_24060 | 618  | C | T | 12 | 5  | --    | TPR |
|            | Ca(ICC2/PI489777)SNP_24061 | 1571 | T | A | 12 | 3  | --    | TPR |
| CakTC32218 | Ca(ICC2/PI489777)SNP_24062 | 154  | C | T | 9  | 4  | --    | --  |
|            | Ca(ICC2/PI489777)SNP_24063 | 1225 | T | G | 16 | 11 | --    | --  |
|            | Ca(ICC2/PI489777)SNP_24064 | 1335 | C | T | 8  | 15 | --    | --  |
|            | Ca(ICC2/PI489777)SNP_24065 | 1566 | T | C | 9  | 25 | --    | --  |
|            | Ca(ICC2/PI489777)SNP_24066 | 1586 | T | C | 10 | 23 | --    | --  |
|            | Ca(ICC2/PI489777)SNP_24067 | 1830 | A | G | 6  | 6  | --    | --  |
|            | Ca(ICC2/PI489777)SNP_24068 | 1890 | C | G | 6  | 4  | --    | --  |
| CakTC41433 | Ca(ICC2/PI489777)SNP_24069 | 543  | A | G | 7  | 3  | --    | --  |
|            | Ca(ICC2/PI489777)SNP_24070 | 563  | C | T | 7  | 3  | --    | --  |
|            | Ca(ICC2/PI489777)SNP_24071 | 584  | C | A | 8  | 3  | --    | --  |
|            | Ca(ICC2/PI489777)SNP_24072 | 1588 | G | A | 8  | 11 | --    | --  |
|            | Ca(ICC2/PI489777)SNP_24073 | 1775 | C | A | 10 | 4  | --    | --  |
|            | Ca(ICC2/PI489777)SNP_24074 | 1801 | G | A | 7  | 4  | --    | --  |
|            | Ca(ICC2/PI489777)SNP_24075 | 1971 | A | G | 7  | 3  | --    | --  |
|            | Ca(ICC2/PI489777)SNP_24076 | 2038 | A | G | 6  | 3  | --    | --  |
|            | Ca(ICC2/PI489777)SNP_24077 | 2215 | C | T | 5  | 3  | --    | --  |
| CakTC37795 | Ca(ICC2/PI489777)SNP_24078 | 878  | A | T | 18 | 6  | --    | --  |
|            | Ca(ICC2/PI489777)SNP_24079 | 1484 | C | A | 8  | 6  | --    | --  |
| CakTC10506 | Ca(ICC2/PI489777)SNP_24080 | 469  | A | G | 25 | 17 | --    | --  |
|            | Ca(ICC2/PI489777)SNP_24081 | 937  | C | T | 45 | 36 | --    | --  |
|            | Ca(ICC2/PI489777)SNP_24082 | 1099 | A | G | 26 | 25 | --    | --  |
| CakTC42152 | Ca(ICC2/PI489777)SNP_24083 | 442  | G | A | 52 | 63 | --    | --  |
|            | Ca(ICC2/PI489777)SNP_24084 | 1246 | T | A | 66 | 38 | --    | --  |
|            | Ca(ICC2/PI489777)SNP_24085 | 1303 | G | A | 62 | 42 | --    | --  |
|            | Ca(ICC2/PI489777)SNP_24086 | 1652 | T | C | 25 | 46 | --    | --  |
|            | Ca(ICC2/PI489777)SNP_24087 | 1680 | G | A | 28 | 47 | --    | --  |
| CakTC41976 | Ca(ICC2/PI489777)SNP_24088 | 559  | G | C | 28 | 39 | --    | --  |
|            | Ca(ICC2/PI489777)SNP_24089 | 1480 | A | C | 8  | 19 | --    | --  |
|            | Ca(ICC2/PI489777)SNP_24090 | 1729 | T | C | 5  | 16 | --    | --  |
| CakTC41892 | Ca(ICC2/PI489777)SNP_24091 | 204  | A | T | 10 | 26 | --    | --  |
|            | Ca(ICC2/PI489777)SNP_24092 | 860  | T | C | 14 | 20 | --    | --  |
|            | Ca(ICC2/PI489777)SNP_24093 | 875  | T | G | 13 | 18 | --    | --  |
| CakTC09511 | Ca(ICC2/PI489777)SNP_24094 | 1938 | A | G | 3  | 3  | --    | --  |
|            | Ca(ICC2/PI489777)SNP_24095 | 1946 | C | T | 3  | 3  | --    | --  |
| CakTC23023 | Ca(ICC2/PI489777)SNP_24096 | 1354 | A | G | 3  | 4  | --    | --  |
|            | Ca(ICC2/PI489777)SNP_24097 | 1374 | G | C | 3  | 4  | --    | --  |
|            | Ca(ICC2/PI489777)SNP_24098 | 1418 | A | G | 3  | 4  | --    | --  |
| CakTC24839 | Ca(ICC2/PI489777)SNP_24099 | 1268 | T | C | 13 | 7  | --    | --  |
|            | Ca(ICC2/PI489777)SNP_24100 | 1349 | G | A | 11 | 16 | --    | --  |
| CakTC34849 | Ca(ICC2/PI489777)SNP_24101 | 991  | G | A | 7  | 4  | --    | --  |
|            | Ca(ICC2/PI489777)SNP_24102 | 3088 | T | C | 6  | 10 | --    | --  |
| CakTC31971 | Ca(ICC2/PI489777)SNP_24103 | 246  | C | G | 16 | 8  | Shoot | --  |
|            | Ca(ICC2/PI489777)SNP_24104 | 258  | C | T | 15 | 8  | Shoot | --  |
|            | Ca(ICC2/PI489777)SNP_24105 | 423  | T | C | 13 | 9  | Shoot | --  |
|            | Ca(ICC2/PI489777)SNP_24106 | 813  | G | C | 15 | 3  | Shoot | --  |
|            | Ca(ICC2/PI489777)SNP_24107 | 872  | T | C | 12 | 3  | Shoot | --  |
|            | Ca(ICC2/PI489777)SNP_24108 | 1509 | C | T | 10 | 5  | Shoot | --  |
|            | Ca(ICC2/PI489777)SNP_24109 | 1582 | T | C | 8  | 6  | Shoot | --  |
|            | Ca(ICC2/PI489777)SNP_24110 | 1863 | G | A | 12 | 3  | Shoot | --  |
|            | Ca(ICC2/PI489777)SNP_24111 | 2497 | A | G | 3  | 3  | Shoot | --  |
| CakTC06303 | Ca(ICC2/PI489777)SNP_24112 | 112  | G | A | 5  | 3  | --    | --  |
|            | Ca(ICC2/PI489777)SNP_24113 | 113  | C | T | 5  | 3  | --    | --  |
| CakTC34494 | Ca(ICC2/PI489777)SNP_24114 | 412  | A | G | 4  | 4  | --    | --  |
| CakTC26983 | Ca(ICC2/PI489777)SNP_24115 | 269  | A | T | 32 | 11 | --    | --  |
|            | Ca(ICC2/PI489777)SNP_24116 | 468  | T | G | 16 | 6  | --    | --  |
|            | Ca(ICC2/PI489777)SNP_24117 | 475  | C | T | 25 | 6  | --    | --  |
|            | Ca(ICC2/PI489777)SNP_24118 | 489  | A | G | 16 | 6  | --    | --  |
|            | Ca(ICC2/PI489777)SNP_24119 | 653  | T | C | 15 | 5  | --    | --  |

|            |                            |      |   |   |     |     |        |              |
|------------|----------------------------|------|---|---|-----|-----|--------|--------------|
| CakTC28805 | Ca(ICC2/P1489777)SNP_24120 | 117  | A | G | 7   | 24  | Root   | --           |
|            | Ca(ICC2/P1489777)SNP_24121 | 125  | G | C | 8   | 28  | Root   | --           |
|            | Ca(ICC2/P1489777)SNP_24122 | 129  | C | T | 7   | 27  | Root   | --           |
|            | Ca(ICC2/P1489777)SNP_24123 | 207  | A | G | 7   | 34  | Root   | --           |
|            | Ca(ICC2/P1489777)SNP_24124 | 229  | C | A | 8   | 34  | Root   | --           |
|            | Ca(ICC2/P1489777)SNP_24125 | 375  | T | C | 17  | 46  | Root   | --           |
|            | Ca(ICC2/P1489777)SNP_24126 | 446  | C | T | 18  | 44  | Root   | --           |
|            | Ca(ICC2/P1489777)SNP_24127 | 748  | C | G | 3   | 24  | Root   | --           |
|            | Ca(ICC2/P1489777)SNP_24128 | 760  | G | C | 3   | 20  | Root   | --           |
|            | Ca(ICC2/P1489777)SNP_24129 | 761  | T | C | 3   | 20  | Root   | --           |
| CakTC40455 | Ca(ICC2/P1489777)SNP_24130 | 402  | C | G | 4   | 3   | --     | --           |
| CakTC39852 | Ca(ICC2/P1489777)SNP_24131 | 153  | G | A | 21  | 4   | --     | --           |
|            | Ca(ICC2/P1489777)SNP_24132 | 945  | A | C | 27  | 5   | --     | --           |
| CakTC24525 | Ca(ICC2/P1489777)SNP_24133 | 1736 | C | G | 5   | 3   | --     | --           |
| CakTC23577 | Ca(ICC2/P1489777)SNP_24134 | 632  | T | C | 9   | 4   | --     | --           |
| CakTC27549 | Ca(ICC2/P1489777)SNP_24135 | 1818 | G | A | 6   | 8   | --     | WI/SNF-BAF60 |
|            | Ca(ICC2/P1489777)SNP_24136 | 2513 | A | G | 8   | 3   | --     | WI/SNF-BAF60 |
| CakTC29888 | Ca(ICC2/P1489777)SNP_24137 | 1011 | G | A | 12  | 5   | --     | --           |
|            | Ca(ICC2/P1489777)SNP_24138 | 2087 | T | C | 5   | 8   | --     | --           |
|            | Ca(ICC2/P1489777)SNP_24139 | 2291 | G | T | 8   | 6   | --     | --           |
| CakTC23406 | Ca(ICC2/P1489777)SNP_24140 | 680  | G | A | 175 | 124 | Flower | bud          |
|            | Ca(ICC2/P1489777)SNP_24141 | 878  | T | C | 157 | 116 | Flower | bud          |
|            | Ca(ICC2/P1489777)SNP_24142 | 926  | T | C | 162 | 127 | Flower | bud          |
|            | Ca(ICC2/P1489777)SNP_24143 | 1079 | C | T | 186 | 110 | Flower | bud          |
|            | Ca(ICC2/P1489777)SNP_24144 | 1751 | G | A | 104 | 83  | Flower | bud          |
| CakTC23337 | Ca(ICC2/P1489777)SNP_24145 | 529  | C | G | 8   | 6   | --     | --           |
| CakTC36971 | Ca(ICC2/P1489777)SNP_24146 | 466  | C | G | 13  | 15  | --     | --           |
|            | Ca(ICC2/P1489777)SNP_24147 | 831  | T | C | 14  | 18  | --     | --           |
|            | Ca(ICC2/P1489777)SNP_24148 | 1084 | C | T | 19  | 18  | --     | --           |
|            | Ca(ICC2/P1489777)SNP_24149 | 1469 | C | T | 23  | 17  | --     | --           |
|            | Ca(ICC2/P1489777)SNP_24150 | 1600 | T | G | 21  | 23  | --     | --           |
|            | Ca(ICC2/P1489777)SNP_24151 | 1639 | G | A | 23  | 21  | --     | --           |
|            | Ca(ICC2/P1489777)SNP_24152 | 1648 | C | T | 22  | 25  | --     | --           |
| CakTC38009 | Ca(ICC2/P1489777)SNP_24153 | 184  | T | A | 11  | 4   | --     | --           |
|            | Ca(ICC2/P1489777)SNP_24154 | 204  | T | A | 14  | 3   | --     | --           |
|            | Ca(ICC2/P1489777)SNP_24155 | 215  | T | C | 14  | 4   | --     | --           |
|            | Ca(ICC2/P1489777)SNP_24156 | 348  | A | G | 17  | 9   | --     | --           |
|            | Ca(ICC2/P1489777)SNP_24157 | 542  | G | A | 21  | 11  | --     | --           |
|            | Ca(ICC2/P1489777)SNP_24158 | 825  | G | C | 26  | 8   | --     | --           |
| CakTC34340 | Ca(ICC2/P1489777)SNP_24159 | 304  | A | C | 26  | 6   | --     | --           |
|            | Ca(ICC2/P1489777)SNP_24160 | 371  | T | C | 54  | 11  | --     | --           |
|            | Ca(ICC2/P1489777)SNP_24161 | 764  | C | A | 32  | 14  | --     | --           |
|            | Ca(ICC2/P1489777)SNP_24162 | 2108 | A | G | 20  | 14  | --     | --           |
|            | Ca(ICC2/P1489777)SNP_24163 | 2477 | A | C | 26  | 18  | --     | --           |
|            | Ca(ICC2/P1489777)SNP_24164 | 2513 | C | A | 27  | 19  | --     | --           |
|            | Ca(ICC2/P1489777)SNP_24165 | 3929 | C | T | 16  | 14  | --     | --           |
|            | Ca(ICC2/P1489777)SNP_24166 | 4394 | A | G | 22  | 9   | --     | --           |
|            | Ca(ICC2/P1489777)SNP_24167 | 5330 | G | A | 9   | 5   | --     | --           |
| CakTC28313 | Ca(ICC2/P1489777)SNP_24168 | 974  | G | C | 16  | 7   | --     | --           |
| CakTC38888 | Ca(ICC2/P1489777)SNP_24169 | 156  | T | C | 16  | 9   | --     | --           |
|            | Ca(ICC2/P1489777)SNP_24170 | 1430 | A | G | 15  | 12  | --     | --           |
|            | Ca(ICC2/P1489777)SNP_24171 | 1502 | C | T | 12  | 9   | --     | --           |
| CakTC31730 | Ca(ICC2/P1489777)SNP_24172 | 892  | A | G | 25  | 16  | --     | --           |
|            | Ca(ICC2/P1489777)SNP_24173 | 1125 | G | A | 7   | 5   | --     | --           |
| CakTC42159 | Ca(ICC2/P1489777)SNP_24174 | 453  | A | G | 48  | 52  | --     | --           |
| CakTC38674 | Ca(ICC2/P1489777)SNP_24175 | 461  | A | C | 8   | 4   | --     | --           |
|            | Ca(ICC2/P1489777)SNP_24176 | 605  | A | G | 5   | 5   | --     | --           |
|            | Ca(ICC2/P1489777)SNP_24177 | 615  | T | C | 7   | 4   | --     | --           |
| CakTC28295 | Ca(ICC2/P1489777)SNP_24178 | 295  | C | G | 4   | 3   | --     | AP2-EREBP    |
|            | Ca(ICC2/P1489777)SNP_24179 | 331  | G | C | 5   | 3   | --     | AP2-EREBP    |
|            | Ca(ICC2/P1489777)SNP_24180 | 1294 | A | G | 7   | 4   | --     | AP2-EREBP    |
| CakTC36305 | Ca(ICC2/P1489777)SNP_24181 | 1161 | C | T | 8   | 3   | --     | --           |
|            | Ca(ICC2/P1489777)SNP_24182 | 1313 | G | T | 8   | 7   | --     | --           |
|            | Ca(ICC2/P1489777)SNP_24183 | 1659 | T | C | 9   | 3   | --     | --           |
|            | Ca(ICC2/P1489777)SNP_24184 | 1680 | C | T | 9   | 3   | --     | --           |
|            | Ca(ICC2/P1489777)SNP_24185 | 2124 | G | A | 9   | 5   | --     | --           |
|            | Ca(ICC2/P1489777)SNP_24186 | 2355 | T | C | 15  | 3   | --     | --           |
|            | Ca(ICC2/P1489777)SNP_24187 | 2481 | A | G | 13  | 4   | --     | --           |
|            | Ca(ICC2/P1489777)SNP_24188 | 2539 | T | C | 12  | 4   | --     | --           |
|            | Ca(ICC2/P1489777)SNP_24189 | 2603 | G | C | 11  | 3   | --     | --           |
| CakTC25025 | Ca(ICC2/P1489777)SNP_24190 | 241  | A | G | 21  | 19  | --     | --           |
|            | Ca(ICC2/P1489777)SNP_24191 | 562  | G | T | 7   | 23  | --     | --           |
| CakTC28051 | Ca(ICC2/P1489777)SNP_24192 | 1896 | A | G | 10  | 8   | --     | --           |
| CakTC11541 | Ca(ICC2/P1489777)SNP_24193 | 57   | A | G | 4   | 3   | --     | --           |

|            |                             |      |   |   |    |    |       |           |
|------------|-----------------------------|------|---|---|----|----|-------|-----------|
| CakTC42575 | Ca(ICCV2/PI489777)SNP_24194 | 854  | G | A | 5  | 5  | --    | --        |
| CakTC27209 | Ca(ICCV2/PI489777)SNP_24195 | 145  | C | T | 10 | 8  | --    | --        |
|            | Ca(ICCV2/PI489777)SNP_24196 | 181  | A | G | 13 | 10 | --    | --        |
|            | Ca(ICCV2/PI489777)SNP_24197 | 385  | G | C | 17 | 24 | --    | --        |
|            | Ca(ICCV2/PI489777)SNP_24198 | 642  | C | T | 47 | 34 | --    | --        |
|            | Ca(ICCV2/PI489777)SNP_24199 | 1105 | T | G | 52 | 39 | --    | --        |
|            | Ca(ICCV2/PI489777)SNP_24200 | 1270 | A | G | 50 | 41 | --    | --        |
|            | Ca(ICCV2/PI489777)SNP_24201 | 1481 | G | T | 25 | 18 | --    | --        |
| CakTC23326 | Ca(ICCV2/PI489777)SNP_24202 | 307  | G | A | 10 | 4  | --    | --        |
|            | Ca(ICCV2/PI489777)SNP_24203 | 2391 | G | A | 90 | 35 | --    | --        |
| CakTC31591 | Ca(ICCV2/PI489777)SNP_24204 | 157  | A | G | 18 | 11 | --    | --        |
|            | Ca(ICCV2/PI489777)SNP_24205 | 924  | G | A | 20 | 4  | --    | --        |
| CakTC38774 | Ca(ICCV2/PI489777)SNP_24206 | 742  | A | G | 7  | 4  | --    | --        |
|            | Ca(ICCV2/PI489777)SNP_24207 | 1350 | G | C | 4  | 5  | --    | --        |
|            | Ca(ICCV2/PI489777)SNP_24208 | 1461 | T | A | 3  | 4  | --    | --        |
| CakTC39541 | Ca(ICCV2/PI489777)SNP_24209 | 1105 | T | A | 23 | 11 | --    | --        |
| CakTC39644 | Ca(ICCV2/PI489777)SNP_24210 | 724  | A | G | 14 | 8  | --    | --        |
|            | Ca(ICCV2/PI489777)SNP_24211 | 1034 | C | T | 24 | 3  | --    | --        |
| CakTC30888 | Ca(ICCV2/PI489777)SNP_24212 | 1470 | T | C | 11 | 3  | --    | bHLH      |
| CakTC37135 | Ca(ICCV2/PI489777)SNP_24213 | 39   | A | C | 7  | 4  | --    | --        |
|            | Ca(ICCV2/PI489777)SNP_24214 | 867  | T | A | 25 | 15 | --    | --        |
|            | Ca(ICCV2/PI489777)SNP_24215 | 1026 | G | C | 8  | 3  | --    | --        |
| CakTC39234 | Ca(ICCV2/PI489777)SNP_24216 | 175  | G | A | 6  | 4  | --    | --        |
|            | Ca(ICCV2/PI489777)SNP_24217 | 193  | T | A | 11 | 6  | --    | --        |
| CakTC30416 | Ca(ICCV2/PI489777)SNP_24218 | 633  | A | G | 3  | 3  | --    | --        |
| CakTC28380 | Ca(ICCV2/PI489777)SNP_24219 | 574  | C | T | 4  | 5  | Shoot | --        |
|            | Ca(ICCV2/PI489777)SNP_24220 | 877  | G | A | 4  | 4  | Shoot | --        |
|            | Ca(ICCV2/PI489777)SNP_24221 | 1285 | G | A | 10 | 3  | Shoot | --        |
|            | Ca(ICCV2/PI489777)SNP_24222 | 1463 | C | G | 6  | 3  | Shoot | --        |
|            | Ca(ICCV2/PI489777)SNP_24223 | 1497 | T | C | 4  | 3  | Shoot | --        |
| CakTC39967 | Ca(ICCV2/PI489777)SNP_24224 | 371  | G | A | 6  | 4  | --    | --        |
|            | Ca(ICCV2/PI489777)SNP_24225 | 388  | A | T | 6  | 5  | --    | --        |
|            | Ca(ICCV2/PI489777)SNP_24226 | 493  | C | T | 5  | 5  | --    | --        |
| CakTC30957 | Ca(ICCV2/PI489777)SNP_24227 | 561  | T | A | 5  | 4  | --    | NAC       |
|            | Ca(ICCV2/PI489777)SNP_24228 | 1256 | G | A | 29 | 5  | --    | NAC       |
|            | Ca(ICCV2/PI489777)SNP_24229 | 1278 | C | T | 28 | 8  | --    | NAC       |
|            | Ca(ICCV2/PI489777)SNP_24230 | 1630 | G | T | 37 | 11 | --    | NAC       |
|            | Ca(ICCV2/PI489777)SNP_24231 | 1640 | T | A | 29 | 10 | --    | NAC       |
|            | Ca(ICCV2/PI489777)SNP_24232 | 1955 | A | C | 28 | 10 | --    | NAC       |
|            | Ca(ICCV2/PI489777)SNP_24233 | 2072 | A | C | 28 | 13 | --    | NAC       |
|            | Ca(ICCV2/PI489777)SNP_24234 | 2255 | G | A | 35 | 13 | --    | NAC       |
|            | Ca(ICCV2/PI489777)SNP_24235 | 2598 | A | C | 15 | 6  | --    | NAC       |
| CakTC23927 | Ca(ICCV2/PI489777)SNP_24236 | 151  | T | C | 6  | 6  | --    | --        |
|            | Ca(ICCV2/PI489777)SNP_24237 | 881  | C | T | 18 | 6  | --    | --        |
|            | Ca(ICCV2/PI489777)SNP_24238 | 919  | C | T | 19 | 6  | --    | --        |
|            | Ca(ICCV2/PI489777)SNP_24239 | 1379 | G | A | 18 | 3  | --    | --        |
| CakTC25759 | Ca(ICCV2/PI489777)SNP_24240 | 1365 | T | C | 3  | 4  | --    | --        |
|            | Ca(ICCV2/PI489777)SNP_24241 | 1595 | C | A | 5  | 5  | --    | --        |
|            | Ca(ICCV2/PI489777)SNP_24242 | 1780 | C | T | 4  | 6  | --    | --        |
| CakTC43137 | Ca(ICCV2/PI489777)SNP_24243 | 592  | T | C | 24 | 15 | --    | Trihelix  |
|            | Ca(ICCV2/PI489777)SNP_24244 | 1503 | C | T | 15 | 10 | --    | Trihelix  |
| CakTC31825 | Ca(ICCV2/PI489777)SNP_24245 | 394  | A | G | 5  | 3  | --    | --        |
|            | Ca(ICCV2/PI489777)SNP_24246 | 1235 | A | G | 3  | 6  | --    | --        |
|            | Ca(ICCV2/PI489777)SNP_24247 | 1502 | T | C | 3  | 5  | --    | --        |
| CakTC37547 | Ca(ICCV2/PI489777)SNP_24248 | 832  | G | A | 3  | 8  | --    | --        |
|            | Ca(ICCV2/PI489777)SNP_24249 | 945  | A | G | 7  | 9  | --    | --        |
|            | Ca(ICCV2/PI489777)SNP_24250 | 1020 | T | A | 7  | 6  | --    | --        |
|            | Ca(ICCV2/PI489777)SNP_24251 | 1025 | A | G | 6  | 8  | --    | --        |
| CakTC24067 | Ca(ICCV2/PI489777)SNP_24252 | 1174 | C | A | 7  | 11 | --    | AP2-EREBP |
|            | Ca(ICCV2/PI489777)SNP_24253 | 1264 | A | G | 8  | 10 | --    | AP2-EREBP |
|            | Ca(ICCV2/PI489777)SNP_24254 | 1380 | T | G | 8  | 12 | --    | AP2-EREBP |
|            | Ca(ICCV2/PI489777)SNP_24255 | 1505 | G | A | 7  | 11 | --    | AP2-EREBP |
| CakTC32152 | Ca(ICCV2/PI489777)SNP_24256 | 340  | G | A | 11 | 6  | --    | --        |
|            | Ca(ICCV2/PI489777)SNP_24257 | 341  | C | A | 11 | 6  | --    | --        |
|            | Ca(ICCV2/PI489777)SNP_24258 | 458  | C | G | 7  | 4  | --    | --        |
|            | Ca(ICCV2/PI489777)SNP_24259 | 510  | C | T | 8  | 4  | --    | --        |
| CakTC38829 | Ca(ICCV2/PI489777)SNP_24260 | 48   | G | A | 4  | 4  | --    | --        |
|            | Ca(ICCV2/PI489777)SNP_24261 | 83   | A | T | 4  | 5  | --    | --        |
|            | Ca(ICCV2/PI489777)SNP_24262 | 99   | A | C | 4  | 4  | --    | --        |
|            | Ca(ICCV2/PI489777)SNP_24263 | 1139 | C | A | 33 | 13 | --    | --        |
| CakTC09803 | Ca(ICCV2/PI489777)SNP_24264 | 108  | G | C | 8  | 3  | --    | --        |
|            | Ca(ICCV2/PI489777)SNP_24265 | 239  | T | C | 11 | 4  | --    | --        |
|            | Ca(ICCV2/PI489777)SNP_24266 | 899  | C | A | 6  | 3  | --    | --        |
|            | Ca(ICCV2/PI489777)SNP_24267 | 2230 | G | A | 7  | 5  | --    | --        |



|            |                             |      |   |   |     |    |    |              |
|------------|-----------------------------|------|---|---|-----|----|----|--------------|
| CakTC41263 | Ca(ICCV2/PI489777)SNP_24268 | 298  | A | C | 15  | 24 | -- | --           |
|            | Ca(ICCV2/PI489777)SNP_24269 | 338  | A | G | 14  | 25 | -- | --           |
|            | Ca(ICCV2/PI489777)SNP_24270 | 467  | T | C | 22  | 32 | -- | --           |
| CakTC11456 | Ca(ICCV2/PI489777)SNP_24271 | 2208 | T | G | 8   | 3  | -- | --           |
|            | Ca(ICCV2/PI489777)SNP_24272 | 2421 | T | A | 3   | 3  | -- | --           |
|            | Ca(ICCV2/PI489777)SNP_24273 | 2466 | C | A | 4   | 3  | -- | --           |
| CakTC26455 | Ca(ICCV2/PI489777)SNP_24274 | 452  | T | C | 18  | 8  | -- | --           |
|            | Ca(ICCV2/PI489777)SNP_24275 | 482  | T | C | 19  | 7  | -- | --           |
|            | Ca(ICCV2/PI489777)SNP_24276 | 647  | C | T | 21  | 7  | -- | --           |
|            | Ca(ICCV2/PI489777)SNP_24277 | 890  | G | A | 12  | 4  | -- | --           |
| CakTC36273 | Ca(ICCV2/PI489777)SNP_24278 | 204  | C | A | 23  | 4  | -- | --           |
|            | Ca(ICCV2/PI489777)SNP_24279 | 654  | G | A | 16  | 11 | -- | --           |
|            | Ca(ICCV2/PI489777)SNP_24280 | 673  | C | T | 17  | 13 | -- | --           |
|            | Ca(ICCV2/PI489777)SNP_24281 | 1386 | A | T | 18  | 6  | -- | --           |
|            | Ca(ICCV2/PI489777)SNP_24282 | 2871 | T | A | 8   | 8  | -- | --           |
| CakTC28293 | Ca(ICCV2/PI489777)SNP_24283 | 69   | T | C | 55  | 19 | -- | --           |
|            | Ca(ICCV2/PI489777)SNP_24284 | 226  | T | C | 153 | 39 | -- | --           |
| CakTC37399 | Ca(ICCV2/PI489777)SNP_24285 | 845  | A | G | 45  | 42 | -- | --           |
| CakTC08455 | Ca(ICCV2/PI489777)SNP_24286 | 604  | A | C | 3   | 3  | -- | --           |
| CakTC34396 | Ca(ICCV2/PI489777)SNP_24287 | 223  | T | G | 24  | 31 | -- | --           |
| CakTC38107 | Ca(ICCV2/PI489777)SNP_24288 | 1706 | G | A | 17  | 12 | -- | --           |
|            | Ca(ICCV2/PI489777)SNP_24289 | 1847 | T | A | 3   | 6  | -- | --           |
| CakTC10289 | Ca(ICCV2/PI489777)SNP_24290 | 241  | T | C | 6   | 4  | -- | --           |
|            | Ca(ICCV2/PI489777)SNP_24291 | 1002 | G | A | 22  | 7  | -- | --           |
|            | Ca(ICCV2/PI489777)SNP_24292 | 1674 | A | G | 12  | 3  | -- | --           |
| CakTC38180 | Ca(ICCV2/PI489777)SNP_24293 | 965  | C | T | 8   | 4  | -- | --           |
| CakTC08074 | Ca(ICCV2/PI489777)SNP_24294 | 1966 | C | T | 3   | 4  | -- | --           |
| CakTC24846 | Ca(ICCV2/PI489777)SNP_24295 | 229  | C | T | 15  | 6  | -- | --           |
|            | Ca(ICCV2/PI489777)SNP_24296 | 245  | T | C | 16  | 7  | -- | --           |
|            | Ca(ICCV2/PI489777)SNP_24297 | 247  | A | G | 17  | 6  | -- | --           |
|            | Ca(ICCV2/PI489777)SNP_24298 | 272  | T | C | 18  | 7  | -- | --           |
|            | Ca(ICCV2/PI489777)SNP_24299 | 356  | C | A | 19  | 7  | -- | --           |
| CakTC24149 | Ca(ICCV2/PI489777)SNP_24300 | 661  | G | A | 21  | 18 | -- | --           |
|            | Ca(ICCV2/PI489777)SNP_24301 | 724  | A | G | 20  | 14 | -- | --           |
| CakTC25092 | Ca(ICCV2/PI489777)SNP_24302 | 257  | A | T | 35  | 16 | -- | --           |
|            | Ca(ICCV2/PI489777)SNP_24303 | 268  | A | G | 36  | 15 | -- | --           |
|            | Ca(ICCV2/PI489777)SNP_24304 | 280  | G | A | 30  | 13 | -- | --           |
|            | Ca(ICCV2/PI489777)SNP_24305 | 322  | C | T | 38  | 17 | -- | --           |
|            | Ca(ICCV2/PI489777)SNP_24306 | 331  | G | A | 33  | 17 | -- | --           |
|            | Ca(ICCV2/PI489777)SNP_24307 | 348  | A | C | 38  | 19 | -- | --           |
| CakTC38004 | Ca(ICCV2/PI489777)SNP_24308 | 107  | C | T | 10  | 5  | -- | --           |
| CakTC42782 | Ca(ICCV2/PI489777)SNP_24309 | 527  | G | C | 19  | 11 | -- | --           |
|            | Ca(ICCV2/PI489777)SNP_24310 | 649  | C | A | 16  | 13 | -- | --           |
|            | Ca(ICCV2/PI489777)SNP_24311 | 1200 | G | A | 18  | 7  | -- | --           |
|            | Ca(ICCV2/PI489777)SNP_24312 | 1555 | C | T | 9   | 7  | -- | --           |
| CakTC38985 | Ca(ICCV2/PI489777)SNP_24313 | 1019 | G | T | 3   | 4  | -- | --           |
|            | Ca(ICCV2/PI489777)SNP_24314 | 1085 | C | T | 4   | 4  | -- | --           |
|            | Ca(ICCV2/PI489777)SNP_24315 | 1183 | A | C | 3   | 5  | -- | --           |
| CakTC28634 | Ca(ICCV2/PI489777)SNP_24316 | 151  | G | A | 3   | 3  | -- | C2C2-CO-like |
|            | Ca(ICCV2/PI489777)SNP_24317 | 665  | G | A | 10  | 4  | -- | C2C2-CO-like |
|            | Ca(ICCV2/PI489777)SNP_24318 | 747  | G | A | 7   | 4  | -- | C2C2-CO-like |
|            | Ca(ICCV2/PI489777)SNP_24319 | 858  | T | C | 7   | 12 | -- | C2C2-CO-like |
|            | Ca(ICCV2/PI489777)SNP_24320 | 982  | C | A | 10  | 13 | -- | C2C2-CO-like |
|            | Ca(ICCV2/PI489777)SNP_24321 | 985  | G | A | 10  | 13 | -- | C2C2-CO-like |
|            | Ca(ICCV2/PI489777)SNP_24322 | 1030 | T | C | 7   | 16 | -- | C2C2-CO-like |
|            | Ca(ICCV2/PI489777)SNP_24323 | 1206 | C | G | 14  | 11 | -- | C2C2-CO-like |
|            | Ca(ICCV2/PI489777)SNP_24324 | 1232 | A | G | 13  | 10 | -- | C2C2-CO-like |
|            | Ca(ICCV2/PI489777)SNP_24325 | 1311 | C | G | 13  | 10 | -- | C2C2-CO-like |
|            | Ca(ICCV2/PI489777)SNP_24326 | 1364 | C | G | 10  | 8  | -- | C2C2-CO-like |
|            | Ca(ICCV2/PI489777)SNP_24327 | 1382 | G | A | 10  | 8  | -- | C2C2-CO-like |
| CakTC33062 | Ca(ICCV2/PI489777)SNP_24328 | 180  | C | G | 33  | 24 | -- | --           |
|            | Ca(ICCV2/PI489777)SNP_24329 | 535  | G | C | 3   | 5  | -- | --           |
| CakTC41562 | Ca(ICCV2/PI489777)SNP_24330 | 228  | A | T | 3   | 10 | -- | --           |
|            | Ca(ICCV2/PI489777)SNP_24331 | 653  | G | A | 4   | 9  | -- | --           |
| CakTC09601 | Ca(ICCV2/PI489777)SNP_24332 | 1571 | C | T | 4   | 4  | -- | --           |
|            | Ca(ICCV2/PI489777)SNP_24333 | 1645 | C | T | 4   | 3  | -- | --           |
|            | Ca(ICCV2/PI489777)SNP_24334 | 1982 | T | C | 3   | 6  | -- | --           |
| CakTC25134 | Ca(ICCV2/PI489777)SNP_24335 | 304  | T | G | 23  | 21 | -- | --           |
|            | Ca(ICCV2/PI489777)SNP_24336 | 409  | C | G | 20  | 22 | -- | --           |
|            | Ca(ICCV2/PI489777)SNP_24337 | 988  | T | G | 40  | 32 | -- | --           |
|            | Ca(ICCV2/PI489777)SNP_24338 | 1033 | A | G | 41  | 30 | -- | --           |
|            | Ca(ICCV2/PI489777)SNP_24339 | 1086 | T | A | 41  | 31 | -- | --           |
|            | Ca(ICCV2/PI489777)SNP_24340 | 1090 | G | T | 42  | 31 | -- | --           |
|            | Ca(ICCV2/PI489777)SNP_24341 | 1150 | A | G | 38  | 31 | -- | --           |

|            |                            |      |   |   |    |    |       |    |
|------------|----------------------------|------|---|---|----|----|-------|----|
|            | Ca(ICC2/PI489777)SNP_24342 | 1167 | G | A | 37 | 33 | --    | -- |
|            | Ca(ICC2/PI489777)SNP_24343 | 1298 | A | G | 40 | 28 | --    | -- |
|            | Ca(ICC2/PI489777)SNP_24344 | 1363 | A | G | 38 | 27 | --    | -- |
|            | Ca(ICC2/PI489777)SNP_24345 | 1384 | C | T | 41 | 26 | --    | -- |
|            | Ca(ICC2/PI489777)SNP_24346 | 1418 | G | A | 37 | 27 | --    | -- |
|            | Ca(ICC2/PI489777)SNP_24347 | 1716 | T | C | 15 | 7  | --    | -- |
| CakTC13748 | Ca(ICC2/PI489777)SNP_24348 | 60   | A | G | 3  | 3  | --    | -- |
|            | Ca(ICC2/PI489777)SNP_24349 | 244  | C | G | 4  | 4  | --    | -- |
|            | Ca(ICC2/PI489777)SNP_24350 | 273  | T | C | 4  | 4  | --    | -- |
| CakTC31407 | Ca(ICC2/PI489777)SNP_24351 | 862  | T | G | 5  | 3  | --    | -- |
|            | Ca(ICC2/PI489777)SNP_24352 | 963  | C | T | 5  | 4  | --    | -- |
|            | Ca(ICC2/PI489777)SNP_24353 | 1013 | T | C | 5  | 4  | --    | -- |
| CakTC29499 | Ca(ICC2/PI489777)SNP_24354 | 721  | C | T | 7  | 4  | --    | -- |
|            | Ca(ICC2/PI489777)SNP_24355 | 844  | T | C | 4  | 6  | --    | -- |
|            | Ca(ICC2/PI489777)SNP_24356 | 949  | C | T | 8  | 6  | --    | -- |
| CakTC40190 | Ca(ICC2/PI489777)SNP_24357 | 115  | G | A | 3  | 5  | --    | -- |
|            | Ca(ICC2/PI489777)SNP_24358 | 280  | A | G | 5  | 6  | --    | -- |
|            | Ca(ICC2/PI489777)SNP_24359 | 937  | A | G | 3  | 3  | --    | -- |
| CakTC13216 | Ca(ICC2/PI489777)SNP_24360 | 702  | A | G | 21 | 19 | --    | -- |
| CakTC30088 | Ca(ICC2/PI489777)SNP_24361 | 305  | T | A | 6  | 3  | --    | -- |
|            | Ca(ICC2/PI489777)SNP_24362 | 390  | T | C | 4  | 5  | --    | -- |
|            | Ca(ICC2/PI489777)SNP_24363 | 1197 | G | A | 5  | 3  | --    | -- |
|            | Ca(ICC2/PI489777)SNP_24364 | 1200 | C | A | 5  | 3  | --    | -- |
| CakTC37592 | Ca(ICC2/PI489777)SNP_24365 | 560  | C | T | 3  | 9  | --    | -- |
|            | Ca(ICC2/PI489777)SNP_24366 | 611  | A | T | 3  | 8  | --    | -- |
|            | Ca(ICC2/PI489777)SNP_24367 | 701  | T | G | 3  | 10 | --    | -- |
| CakTC33658 | Ca(ICC2/PI489777)SNP_24368 | 257  | A | G | 14 | 8  | --    | -- |
|            | Ca(ICC2/PI489777)SNP_24369 | 734  | A | G | 9  | 8  | --    | -- |
| CakTC27174 | Ca(ICC2/PI489777)SNP_24370 | 631  | A | G | 28 | 7  | --    | -- |
|            | Ca(ICC2/PI489777)SNP_24371 | 735  | G | A | 31 | 10 | --    | -- |
|            | Ca(ICC2/PI489777)SNP_24372 | 885  | G | A | 32 | 9  | --    | -- |
|            | Ca(ICC2/PI489777)SNP_24373 | 1074 | T | C | 31 | 9  | --    | -- |
| CakTC33899 | Ca(ICC2/PI489777)SNP_24374 | 568  | T | C | 6  | 4  | --    | -- |
|            | Ca(ICC2/PI489777)SNP_24375 | 694  | A | G | 7  | 4  | --    | -- |
|            | Ca(ICC2/PI489777)SNP_24376 | 913  | C | A | 8  | 3  | --    | -- |
|            | Ca(ICC2/PI489777)SNP_24377 | 1192 | T | C | 12 | 4  | --    | -- |
| CakTC07699 | Ca(ICC2/PI489777)SNP_24378 | 1155 | G | A | 3  | 5  | --    | -- |
|            | Ca(ICC2/PI489777)SNP_24379 | 1380 | C | T | 8  | 5  | --    | -- |
|            | Ca(ICC2/PI489777)SNP_24380 | 2201 | A | T | 9  | 8  | --    | -- |
| CakTC41445 | Ca(ICC2/PI489777)SNP_24381 | 373  | C | G | 8  | 7  | --    | -- |
|            | Ca(ICC2/PI489777)SNP_24382 | 419  | T | G | 8  | 7  | --    | -- |
|            | Ca(ICC2/PI489777)SNP_24383 | 499  | C | T | 3  | 6  | --    | -- |
| CakTC33493 | Ca(ICC2/PI489777)SNP_24384 | 553  | G | T | 23 | 21 | Shoot | -- |
|            | Ca(ICC2/PI489777)SNP_24385 | 1526 | T | A | 25 | 7  | Shoot | -- |
| CakTC03838 | Ca(ICC2/PI489777)SNP_24386 | 685  | T | C | 7  | 3  | --    | -- |
| CakTC30378 | Ca(ICC2/PI489777)SNP_24387 | 305  | G | A | 9  | 3  | Shoot | -- |
|            | Ca(ICC2/PI489777)SNP_24388 | 355  | T | A | 12 | 3  | Shoot | -- |
|            | Ca(ICC2/PI489777)SNP_24389 | 642  | T | C | 11 | 3  | Shoot | -- |
|            | Ca(ICC2/PI489777)SNP_24390 | 724  | T | G | 11 | 4  | Shoot | -- |
|            | Ca(ICC2/PI489777)SNP_24391 | 792  | G | A | 3  | 3  | Shoot | -- |
| CakTC22304 | Ca(ICC2/PI489777)SNP_24392 | 753  | C | T | 8  | 3  | --    | -- |
|            | Ca(ICC2/PI489777)SNP_24393 | 807  | T | A | 8  | 4  | --    | -- |
| CakTC11521 | Ca(ICC2/PI489777)SNP_24394 | 681  | A | G | 17 | 9  | --    | -- |
|            | Ca(ICC2/PI489777)SNP_24395 | 1644 | T | C | 8  | 3  | --    | -- |
| CakTC33069 | Ca(ICC2/PI489777)SNP_24396 | 88   | T | C | 5  | 11 | --    | -- |
|            | Ca(ICC2/PI489777)SNP_24397 | 155  | C | G | 5  | 12 | --    | -- |
|            | Ca(ICC2/PI489777)SNP_24398 | 187  | T | G | 6  | 9  | --    | -- |
|            | Ca(ICC2/PI489777)SNP_24399 | 218  | G | C | 6  | 12 | --    | -- |
|            | Ca(ICC2/PI489777)SNP_24400 | 475  | A | G | 11 | 18 | --    | -- |
|            | Ca(ICC2/PI489777)SNP_24401 | 493  | C | T | 11 | 16 | --    | -- |
|            | Ca(ICC2/PI489777)SNP_24402 | 577  | A | T | 14 | 16 | --    | -- |
|            | Ca(ICC2/PI489777)SNP_24403 | 685  | A | G | 20 | 17 | --    | -- |
|            | Ca(ICC2/PI489777)SNP_24404 | 865  | T | C | 19 | 19 | --    | -- |
|            | Ca(ICC2/PI489777)SNP_24405 | 907  | A | G | 22 | 16 | --    | -- |
|            | Ca(ICC2/PI489777)SNP_24406 | 1012 | T | C | 21 | 15 | --    | -- |
|            | Ca(ICC2/PI489777)SNP_24407 | 1099 | G | T | 24 | 16 | --    | -- |
|            | Ca(ICC2/PI489777)SNP_24408 | 1172 | C | G | 29 | 16 | --    | -- |
|            | Ca(ICC2/PI489777)SNP_24409 | 1186 | G | A | 31 | 17 | --    | -- |
|            | Ca(ICC2/PI489777)SNP_24410 | 1676 | G | A | 24 | 15 | --    | -- |
|            | Ca(ICC2/PI489777)SNP_24411 | 2374 | C | T | 28 | 29 | --    | -- |
|            | Ca(ICC2/PI489777)SNP_24412 | 2510 | G | A | 23 | 20 | --    | -- |
|            | Ca(ICC2/PI489777)SNP_24413 | 2713 | A | G | 5  | 7  | --    | -- |
| CakTC32189 | Ca(ICC2/PI489777)SNP_24414 | 593  | A | C | 9  | 3  | --    | -- |
|            | Ca(ICC2/PI489777)SNP_24415 | 788  | A | G | 4  | 5  | --    | -- |

|            |                            |      |   |   |     |    |           |             |
|------------|----------------------------|------|---|---|-----|----|-----------|-------------|
|            | Ca(ICC2/PI489777)SNP_24416 | 1034 | C | T | 7   | 5  | --        | --          |
|            | Ca(ICC2/PI489777)SNP_24417 | 1065 | T | A | 8   | 3  | --        | --          |
|            | Ca(ICC2/PI489777)SNP_24418 | 1145 | T | C | 8   | 6  | --        | --          |
| CakTC43203 | Ca(ICC2/PI489777)SNP_24419 | 192  | C | T | 14  | 3  | --        | --          |
| CakTC39062 | Ca(ICC2/PI489777)SNP_24420 | 787  | T | C | 38  | 31 | Young_pod | --          |
| CakTC22314 | Ca(ICC2/PI489777)SNP_24421 | 115  | G | T | 93  | 45 | --        | --          |
|            | Ca(ICC2/PI489777)SNP_24422 | 301  | G | A | 135 | 66 | --        | --          |
|            | Ca(ICC2/PI489777)SNP_24423 | 421  | G | A | 172 | 76 | --        | --          |
|            | Ca(ICC2/PI489777)SNP_24424 | 1605 | T | C | 7   | 4  | --        | --          |
|            | Ca(ICC2/PI489777)SNP_24425 | 1719 | T | C | 5   | 3  | --        | --          |
| CakTC27779 | Ca(ICC2/PI489777)SNP_24426 | 1502 | C | G | 33  | 10 | Root      | --          |
|            | Ca(ICC2/PI489777)SNP_24427 | 1710 | A | G | 25  | 18 | Root      | --          |
| CakTC28409 | Ca(ICC2/PI489777)SNP_24428 | 139  | G | T | 11  | 13 | --        | AUX/IAA     |
|            | Ca(ICC2/PI489777)SNP_24429 | 580  | T | C | 10  | 15 | --        | AUX/IAA     |
|            | Ca(ICC2/PI489777)SNP_24430 | 1034 | G | A | 25  | 9  | --        | AUX/IAA     |
| CakTC39018 | Ca(ICC2/PI489777)SNP_24431 | 52   | G | A | 4   | 8  | --        | --          |
|            | Ca(ICC2/PI489777)SNP_24432 | 266  | T | A | 12  | 7  | --        | --          |
|            | Ca(ICC2/PI489777)SNP_24433 | 1061 | A | T | 34  | 13 | --        | --          |
| CakTC24856 | Ca(ICC2/PI489777)SNP_24434 | 1306 | A | C | 4   | 5  | --        | --          |
|            | Ca(ICC2/PI489777)SNP_24435 | 1421 | T | G | 8   | 6  | --        | --          |
|            | Ca(ICC2/PI489777)SNP_24436 | 1682 | C | G | 6   | 3  | --        | --          |
| CakTC26154 | Ca(ICC2/PI489777)SNP_24437 | 1025 | T | C | 5   | 6  | --        | --          |
|            | Ca(ICC2/PI489777)SNP_24438 | 1127 | G | A | 5   | 6  | --        | --          |
|            | Ca(ICC2/PI489777)SNP_24439 | 1258 | T | C | 5   | 4  | --        | --          |
| CakTC24554 | Ca(ICC2/PI489777)SNP_24440 | 1306 | G | A | 6   | 11 | --        | --          |
|            | Ca(ICC2/PI489777)SNP_24441 | 1333 | A | T | 7   | 9  | --        | --          |
|            | Ca(ICC2/PI489777)SNP_24442 | 1764 | A | G | 8   | 3  | --        | --          |
| CakTC37128 | Ca(ICC2/PI489777)SNP_24443 | 351  | A | T | 18  | 14 | --        | --          |
|            | Ca(ICC2/PI489777)SNP_24444 | 417  | C | T | 18  | 17 | --        | --          |
|            | Ca(ICC2/PI489777)SNP_24445 | 516  | A | G | 17  | 12 | --        | --          |
|            | Ca(ICC2/PI489777)SNP_24446 | 1188 | G | A | 6   | 8  | --        | --          |
|            | Ca(ICC2/PI489777)SNP_24447 | 1268 | C | A | 8   | 13 | --        | --          |
|            | Ca(ICC2/PI489777)SNP_24448 | 1402 | A | G | 7   | 10 | --        | --          |
| CakTC39386 | Ca(ICC2/PI489777)SNP_24449 | 1173 | A | G | 30  | 7  | --        | --          |
|            | Ca(ICC2/PI489777)SNP_24450 | 1415 | A | G | 5   | 3  | --        | --          |
| CakTC24070 | Ca(ICC2/PI489777)SNP_24451 | 640  | T | C | 15  | 3  | --        | --          |
|            | Ca(ICC2/PI489777)SNP_24452 | 665  | C | T | 20  | 3  | --        | --          |
| CakTC30417 | Ca(ICC2/PI489777)SNP_24453 | 391  | G | A | 5   | 3  | --        | --          |
| CakTC08719 | Ca(ICC2/PI489777)SNP_24454 | 776  | T | C | 13  | 6  | --        | --          |
|            | Ca(ICC2/PI489777)SNP_24455 | 824  | A | G | 15  | 6  | --        | --          |
|            | Ca(ICC2/PI489777)SNP_24456 | 834  | G | T | 16  | 6  | --        | --          |
|            | Ca(ICC2/PI489777)SNP_24457 | 1358 | A | G | 11  | 3  | --        | --          |
|            | Ca(ICC2/PI489777)SNP_24458 | 1795 | C | T | 25  | 10 | --        | --          |
| CakTC24358 | Ca(ICC2/PI489777)SNP_24459 | 525  | T | C | 48  | 14 | --        | --          |
|            | Ca(ICC2/PI489777)SNP_24460 | 857  | T | C | 34  | 9  | --        | --          |
|            | Ca(ICC2/PI489777)SNP_24461 | 1244 | T | C | 31  | 12 | --        | --          |
|            | Ca(ICC2/PI489777)SNP_24462 | 1563 | C | T | 20  | 11 | --        | --          |
| CakTC33290 | Ca(ICC2/PI489777)SNP_24463 | 1797 | C | T | 7   | 4  | --        | --          |
| CakTC40184 | Ca(ICC2/PI489777)SNP_24464 | 162  | T | C | 27  | 26 | --        | --          |
|            | Ca(ICC2/PI489777)SNP_24465 | 195  | A | G | 30  | 26 | --        | --          |
| CakTC35125 | Ca(ICC2/PI489777)SNP_24466 | 152  | C | T | 4   | 3  | --        | --          |
|            | Ca(ICC2/PI489777)SNP_24467 | 200  | T | C | 4   | 5  | --        | --          |
|            | Ca(ICC2/PI489777)SNP_24468 | 292  | C | T | 6   | 5  | --        | --          |
|            | Ca(ICC2/PI489777)SNP_24469 | 365  | A | G | 5   | 5  | --        | --          |
| CakTC36889 | Ca(ICC2/PI489777)SNP_24470 | 2088 | G | A | 14  | 3  | --        | --          |
|            | Ca(ICC2/PI489777)SNP_24471 | 3277 | A | G | 8   | 8  | --        | --          |
|            | Ca(ICC2/PI489777)SNP_24472 | 3511 | G | A | 15  | 13 | --        | --          |
|            | Ca(ICC2/PI489777)SNP_24473 | 4206 | A | G | 14  | 11 | --        | --          |
| CakTC24620 | Ca(ICC2/PI489777)SNP_24474 | 123  | C | T | 5   | 4  | --        | --          |
|            | Ca(ICC2/PI489777)SNP_24475 | 368  | G | A | 4   | 4  | --        | --          |
|            | Ca(ICC2/PI489777)SNP_24476 | 2799 | T | C | 9   | 3  | --        | --          |
|            | Ca(ICC2/PI489777)SNP_24477 | 3205 | T | A | 4   | 3  | --        | --          |
| CakTC26078 | Ca(ICC2/PI489777)SNP_24478 | 1552 | A | T | 9   | 6  | --        | Bromodomain |
| CakTC25663 | Ca(ICC2/PI489777)SNP_24479 | 3553 | C | T | 6   | 6  | --        | --          |
|            | Ca(ICC2/PI489777)SNP_24480 | 3658 | C | T | 5   | 5  | --        | --          |
|            | Ca(ICC2/PI489777)SNP_24481 | 3947 | A | G | 7   | 4  | --        | --          |
|            | Ca(ICC2/PI489777)SNP_24482 | 3948 | G | T | 7   | 4  | --        | --          |
|            | Ca(ICC2/PI489777)SNP_24483 | 4129 | A | C | 10  | 7  | --        | --          |
|            | Ca(ICC2/PI489777)SNP_24484 | 4154 | C | T | 11  | 6  | --        | --          |
|            | Ca(ICC2/PI489777)SNP_24485 | 4254 | T | G | 14  | 5  | --        | --          |
|            | Ca(ICC2/PI489777)SNP_24486 | 4326 | A | G | 10  | 3  | --        | --          |
|            | Ca(ICC2/PI489777)SNP_24487 | 4614 | G | C | 24  | 3  | --        | --          |
| CakTC38190 | Ca(ICC2/PI489777)SNP_24488 | 165  | T | C | 56  | 21 | --        | --          |
|            | Ca(ICC2/PI489777)SNP_24489 | 183  | G | T | 62  | 23 | --        | --          |

|            |                             |      |   |   |     |     |           |     |
|------------|-----------------------------|------|---|---|-----|-----|-----------|-----|
| CakTC39507 | Ca(ICCV2/PI489777)SNP_24490 | 400  | G | A | 7   | 12  | --        | --  |
|            | Ca(ICCV2/PI489777)SNP_24491 | 409  | T | C | 8   | 14  | --        | --  |
|            | Ca(ICCV2/PI489777)SNP_24492 | 583  | T | A | 12  | 8   | --        | --  |
|            | Ca(ICCV2/PI489777)SNP_24493 | 584  | G | C | 12  | 8   | --        | --  |
|            | Ca(ICCV2/PI489777)SNP_24494 | 767  | G | C | 13  | 3   | --        | --  |
|            | Ca(ICCV2/PI489777)SNP_24495 | 1032 | G | C | 13  | 9   | --        | --  |
|            | Ca(ICCV2/PI489777)SNP_24496 | 1064 | T | C | 13  | 10  | --        | --  |
|            | Ca(ICCV2/PI489777)SNP_24497 | 1074 | C | G | 12  | 10  | --        | --  |
|            | Ca(ICCV2/PI489777)SNP_24498 | 1212 | T | C | 7   | 8   | --        | --  |
|            | Ca(ICCV2/PI489777)SNP_24499 | 1249 | A | G | 8   | 8   | --        | --  |
| CakTC25655 | Ca(ICCV2/PI489777)SNP_24500 | 1830 | T | C | 11  | 5   | --        | --  |
|            | Ca(ICCV2/PI489777)SNP_24501 | 2125 | G | T | 8   | 3   | --        | --  |
| CakTC41136 | Ca(ICCV2/PI489777)SNP_24502 | 135  | G | C | 9   | 6   | --        | --  |
|            | Ca(ICCV2/PI489777)SNP_24503 | 391  | G | T | 16  | 8   | --        | --  |
|            | Ca(ICCV2/PI489777)SNP_24504 | 605  | A | C | 16  | 4   | --        | --  |
|            | Ca(ICCV2/PI489777)SNP_24505 | 1345 | G | C | 8   | 3   | --        | --  |
|            | Ca(ICCV2/PI489777)SNP_24506 | 1539 | G | A | 7   | 3   | --        | --  |
|            | Ca(ICCV2/PI489777)SNP_24507 | 1612 | A | G | 7   | 3   | --        | --  |
|            | Ca(ICCV2/PI489777)SNP_24508 | 1617 | C | T | 7   | 3   | --        | --  |
|            | Ca(ICCV2/PI489777)SNP_24509 | 1668 | A | T | 8   | 3   | --        | --  |
|            | Ca(ICCV2/PI489777)SNP_24510 | 1917 | T | A | 11  | 5   | --        | --  |
|            | Ca(ICCV2/PI489777)SNP_24511 | 2082 | A | G | 8   | 3   | --        | --  |
| CakTC24086 | Ca(ICCV2/PI489777)SNP_24512 | 157  | C | A | 3   | 3   | --        | --  |
| CakTC00570 | Ca(ICCV2/PI489777)SNP_24513 | 321  | T | C | 3   | 4   | --        | --  |
| CakTC27622 | Ca(ICCV2/PI489777)SNP_24514 | 1111 | C | T | 7   | 5   | --        | --  |
|            | Ca(ICCV2/PI489777)SNP_24515 | 1201 | G | C | 9   | 3   | --        | --  |
| CakTC28426 | Ca(ICCV2/PI489777)SNP_24516 | 1489 | T | C | 7   | 5   | Root      | --  |
|            | Ca(ICCV2/PI489777)SNP_24517 | 1497 | A | G | 8   | 4   | Root      | --  |
|            | Ca(ICCV2/PI489777)SNP_24518 | 1617 | T | C | 8   | 5   | Root      | --  |
|            | Ca(ICCV2/PI489777)SNP_24519 | 1776 | G | A | 7   | 3   | Root      | --  |
| CakTC11683 | Ca(ICCV2/PI489777)SNP_24520 | 1651 | C | T | 6   | 9   | --        | --  |
|            | Ca(ICCV2/PI489777)SNP_24521 | 1717 | G | A | 4   | 8   | --        | --  |
|            | Ca(ICCV2/PI489777)SNP_24522 | 1795 | G | C | 3   | 4   | --        | --  |
| CakTC39525 | Ca(ICCV2/PI489777)SNP_24523 | 768  | C | T | 28  | 6   | --        | --  |
| CakTC28814 | Ca(ICCV2/PI489777)SNP_24524 | 494  | C | T | 19  | 4   | --        | --  |
|            | Ca(ICCV2/PI489777)SNP_24525 | 581  | G | A | 20  | 5   | --        | --  |
|            | Ca(ICCV2/PI489777)SNP_24526 | 1163 | A | G | 27  | 11  | --        | --  |
| CakTC39270 | Ca(ICCV2/PI489777)SNP_24527 | 268  | G | T | 20  | 4   | --        | --  |
|            | Ca(ICCV2/PI489777)SNP_24528 | 362  | C | T | 17  | 6   | --        | --  |
|            | Ca(ICCV2/PI489777)SNP_24529 | 668  | C | A | 6   | 3   | --        | --  |
|            | Ca(ICCV2/PI489777)SNP_24530 | 1287 | A | G | 9   | 7   | --        | --  |
| CakTC28872 | Ca(ICCV2/PI489777)SNP_24531 | 835  | A | G | 8   | 3   | --        | --  |
|            | Ca(ICCV2/PI489777)SNP_24532 | 836  | A | G | 8   | 4   | --        | --  |
|            | Ca(ICCV2/PI489777)SNP_24533 | 1230 | C | T | 3   | 3   | --        | --  |
| CakTC11908 | Ca(ICCV2/PI489777)SNP_24534 | 270  | A | T | 6   | 3   | Young_pod | --  |
|            | Ca(ICCV2/PI489777)SNP_24535 | 271  | T | C | 6   | 3   | Young_pod | --  |
| CakTC07970 | Ca(ICCV2/PI489777)SNP_24536 | 570  | C | A | 3   | 4   | --        | C3H |
| CakTC38970 | Ca(ICCV2/PI489777)SNP_24537 | 709  | C | T | 7   | 3   | --        | --  |
| CakTC40054 | Ca(ICCV2/PI489777)SNP_24538 | 171  | A | G | 13  | 15  | --        | TAZ |
|            | Ca(ICCV2/PI489777)SNP_24539 | 244  | A | C | 17  | 17  | --        | TAZ |
|            | Ca(ICCV2/PI489777)SNP_24540 | 310  | T | C | 18  | 16  | --        | TAZ |
|            | Ca(ICCV2/PI489777)SNP_24541 | 779  | T | G | 21  | 13  | --        | TAZ |
|            | Ca(ICCV2/PI489777)SNP_24542 | 1356 | T | C | 13  | 25  | --        | TAZ |
|            | Ca(ICCV2/PI489777)SNP_24543 | 1380 | T | C | 13  | 21  | --        | TAZ |
| CakTC23483 | Ca(ICCV2/PI489777)SNP_24544 | 63   | T | C | 16  | 7   | --        | --  |
|            | Ca(ICCV2/PI489777)SNP_24545 | 614  | T | G | 6   | 3   | --        | --  |
|            | Ca(ICCV2/PI489777)SNP_24546 | 848  | A | G | 7   | 4   | --        | --  |
| CakTC23933 | Ca(ICCV2/PI489777)SNP_24547 | 593  | C | T | 143 | 86  | --        | --  |
|            | Ca(ICCV2/PI489777)SNP_24548 | 682  | A | G | 138 | 97  | --        | --  |
|            | Ca(ICCV2/PI489777)SNP_24549 | 2653 | G | T | 150 | 109 | --        | --  |
| CakTC28898 | Ca(ICCV2/PI489777)SNP_24550 | 280  | G | C | 4   | 3   | --        | --  |
| CakTC24015 | Ca(ICCV2/PI489777)SNP_24551 | 72   | A | T | 15  | 22  | --        | --  |
|            | Ca(ICCV2/PI489777)SNP_24552 | 183  | C | A | 22  | 46  | --        | --  |
|            | Ca(ICCV2/PI489777)SNP_24553 | 1476 | A | C | 98  | 137 | --        | --  |
|            | Ca(ICCV2/PI489777)SNP_24554 | 1881 | T | C | 107 | 104 | --        | --  |
|            | Ca(ICCV2/PI489777)SNP_24555 | 2520 | G | A | 105 | 85  | --        | --  |
|            | Ca(ICCV2/PI489777)SNP_24556 | 2655 | G | A | 96  | 81  | --        | --  |
|            | Ca(ICCV2/PI489777)SNP_24557 | 2712 | T | A | 79  | 77  | --        | --  |
| CakTC30911 | Ca(ICCV2/PI489777)SNP_24558 | 1260 | T | C | 4   | 33  | --        | --  |
|            | Ca(ICCV2/PI489777)SNP_24559 | 1616 | T | C | 3   | 14  | --        | --  |
|            | Ca(ICCV2/PI489777)SNP_24560 | 1621 | A | G | 5   | 19  | --        | --  |
|            | Ca(ICCV2/PI489777)SNP_24561 | 1683 | T | C | 5   | 10  | --        | --  |
|            | Ca(ICCV2/PI489777)SNP_24562 | 1845 | A | G | 5   | 4   | --        | --  |
|            | Ca(ICCV2/PI489777)SNP_24563 | 1890 | G | A | 5   | 5   | --        | --  |

|            |                            |      |   |   |    |    |    |      |
|------------|----------------------------|------|---|---|----|----|----|------|
|            | Ca(ICC2/PI489777)SNP_24564 | 1962 | T | C | 4  | 5  | -- | --   |
|            | Ca(ICC2/PI489777)SNP_24565 | 2085 | G | C | 5  | 5  | -- | --   |
|            | Ca(ICC2/PI489777)SNP_24566 | 2105 | T | C | 5  | 5  | -- | --   |
| CakTC29738 | Ca(ICC2/PI489777)SNP_24567 | 223  | A | G | 4  | 4  | -- | --   |
|            | Ca(ICC2/PI489777)SNP_24568 | 360  | C | T | 3  | 5  | -- | --   |
|            | Ca(ICC2/PI489777)SNP_24569 | 1251 | T | A | 8  | 3  | -- | --   |
|            | Ca(ICC2/PI489777)SNP_24570 | 1800 | G | A | 21 | 4  | -- | --   |
| CakTC10155 | Ca(ICC2/PI489777)SNP_24571 | 96   | A | G | 4  | 5  | -- | TPR  |
|            | Ca(ICC2/PI489777)SNP_24572 | 341  | G | T | 5  | 4  | -- | TPR  |
| CakTC30356 | Ca(ICC2/PI489777)SNP_24573 | 317  | T | C | 12 | 3  | -- | --   |
|            | Ca(ICC2/PI489777)SNP_24574 | 416  | C | T | 11 | 3  | -- | --   |
|            | Ca(ICC2/PI489777)SNP_24575 | 559  | A | G | 7  | 7  | -- | --   |
| CakTC04474 | Ca(ICC2/PI489777)SNP_24576 | 1178 | C | T | 8  | 3  | -- | --   |
| CakTC24199 | Ca(ICC2/PI489777)SNP_24577 | 565  | C | T | 29 | 13 | -- | --   |
|            | Ca(ICC2/PI489777)SNP_24578 | 839  | A | G | 25 | 7  | -- | --   |
|            | Ca(ICC2/PI489777)SNP_24579 | 1228 | T | A | 14 | 14 | -- | --   |
|            | Ca(ICC2/PI489777)SNP_24580 | 1231 | A | G | 14 | 14 | -- | --   |
|            | Ca(ICC2/PI489777)SNP_24581 | 1306 | C | A | 8  | 11 | -- | --   |
| CakTC24540 | Ca(ICC2/PI489777)SNP_24582 | 360  | A | T | 5  | 6  | -- | --   |
|            | Ca(ICC2/PI489777)SNP_24583 | 567  | T | C | 12 | 4  | -- | --   |
|            | Ca(ICC2/PI489777)SNP_24584 | 1315 | C | T | 8  | 5  | -- | --   |
| CakTC15788 | Ca(ICC2/PI489777)SNP_24585 | 1584 | T | C | 60 | 23 | -- | --   |
|            | Ca(ICC2/PI489777)SNP_24586 | 1629 | G | A | 57 | 30 | -- | --   |
| CakTC41421 | Ca(ICC2/PI489777)SNP_24587 | 206  | T | C | 9  | 7  | -- | --   |
| CakTC40884 | Ca(ICC2/PI489777)SNP_24588 | 192  | A | G | 9  | 11 | -- | --   |
|            | Ca(ICC2/PI489777)SNP_24589 | 285  | A | G | 9  | 12 | -- | --   |
|            | Ca(ICC2/PI489777)SNP_24590 | 327  | G | T | 20 | 13 | -- | --   |
| CakTC39990 | Ca(ICC2/PI489777)SNP_24591 | 1083 | G | A | 13 | 5  | -- | --   |
| CakTC38443 | Ca(ICC2/PI489777)SNP_24592 | 120  | A | G | 24 | 35 | -- | --   |
|            | Ca(ICC2/PI489777)SNP_24593 | 161  | T | C | 36 | 38 | -- | --   |
|            | Ca(ICC2/PI489777)SNP_24594 | 386  | C | T | 56 | 55 | -- | --   |
|            | Ca(ICC2/PI489777)SNP_24595 | 413  | A | C | 56 | 50 | -- | --   |
|            | Ca(ICC2/PI489777)SNP_24596 | 443  | T | C | 60 | 53 | -- | --   |
|            | Ca(ICC2/PI489777)SNP_24597 | 482  | T | C | 51 | 55 | -- | --   |
|            | Ca(ICC2/PI489777)SNP_24598 | 515  | T | G | 48 | 52 | -- | --   |
|            | Ca(ICC2/PI489777)SNP_24599 | 815  | T | C | 54 | 29 | -- | --   |
|            | Ca(ICC2/PI489777)SNP_24600 | 1328 | G | A | 32 | 21 | -- | --   |
| CakTC43173 | Ca(ICC2/PI489777)SNP_24601 | 947  | G | A | 4  | 5  | -- | --   |
| CakTC25520 | Ca(ICC2/PI489777)SNP_24602 | 304  | A | G | 12 | 14 | -- | --   |
|            | Ca(ICC2/PI489777)SNP_24603 | 625  | C | T | 41 | 18 | -- | --   |
|            | Ca(ICC2/PI489777)SNP_24604 | 742  | T | C | 36 | 18 | -- | --   |
|            | Ca(ICC2/PI489777)SNP_24605 | 1003 | G | A | 32 | 19 | -- | --   |
|            | Ca(ICC2/PI489777)SNP_24606 | 1306 | C | T | 24 | 28 | -- | --   |
|            | Ca(ICC2/PI489777)SNP_24607 | 1384 | G | A | 21 | 28 | -- | --   |
|            | Ca(ICC2/PI489777)SNP_24608 | 1520 | A | G | 16 | 12 | -- | --   |
|            | Ca(ICC2/PI489777)SNP_24609 | 1537 | T | A | 7  | 8  | -- | --   |
| CakTC27333 | Ca(ICC2/PI489777)SNP_24610 | 743  | G | A | 11 | 4  | -- | --   |
| CakTC40059 | Ca(ICC2/PI489777)SNP_24611 | 964  | G | C | 9  | 3  | -- | --   |
|            | Ca(ICC2/PI489777)SNP_24612 | 1052 | C | T | 4  | 3  | -- | --   |
| CakTC29022 | Ca(ICC2/PI489777)SNP_24613 | 811  | G | A | 13 | 5  | -- | --   |
|            | Ca(ICC2/PI489777)SNP_24614 | 1020 | C | G | 15 | 6  | -- | --   |
|            | Ca(ICC2/PI489777)SNP_24615 | 1138 | C | T | 12 | 9  | -- | --   |
|            | Ca(ICC2/PI489777)SNP_24616 | 1676 | G | C | 7  | 6  | -- | --   |
| CakTC26604 | Ca(ICC2/PI489777)SNP_24617 | 563  | A | G | 6  | 6  | -- | --   |
| CakTC26095 | Ca(ICC2/PI489777)SNP_24618 | 154  | T | C | 32 | 12 | -- | --   |
| CakTC30341 | Ca(ICC2/PI489777)SNP_24619 | 63   | T | C | 3  | 3  | -- | --   |
|            | Ca(ICC2/PI489777)SNP_24620 | 76   | G | T | 3  | 3  | -- | --   |
| CakTC26071 | Ca(ICC2/PI489777)SNP_24621 | 295  | A | T | 3  | 10 | -- | --   |
| CakTC26129 | Ca(ICC2/PI489777)SNP_24622 | 805  | A | T | 28 | 5  | -- | WRKY |
| CakTC41289 | Ca(ICC2/PI489777)SNP_24623 | 576  | C | G | 15 | 8  | -- | --   |
|            | Ca(ICC2/PI489777)SNP_24624 | 591  | A | G | 14 | 9  | -- | --   |
|            | Ca(ICC2/PI489777)SNP_24625 | 864  | T | C | 8  | 12 | -- | --   |
|            | Ca(ICC2/PI489777)SNP_24626 | 921  | G | A | 7  | 11 | -- | --   |
|            | Ca(ICC2/PI489777)SNP_24627 | 1167 | G | A | 10 | 3  | -- | --   |
|            | Ca(ICC2/PI489777)SNP_24628 | 1473 | G | T | 8  | 5  | -- | --   |
| CakTC01281 | Ca(ICC2/PI489777)SNP_24629 | 1013 | C | T | 4  | 6  | -- | --   |
| CakTC26488 | Ca(ICC2/PI489777)SNP_24630 | 672  | T | A | 4  | 4  | -- | --   |
| CakTC42450 | Ca(ICC2/PI489777)SNP_24631 | 192  | T | A | 3  | 3  | -- | --   |
|            | Ca(ICC2/PI489777)SNP_24632 | 1544 | C | T | 12 | 9  | -- | --   |
| CakTC38928 | Ca(ICC2/PI489777)SNP_24633 | 390  | C | A | 10 | 5  | -- | --   |
|            | Ca(ICC2/PI489777)SNP_24634 | 407  | A | T | 11 | 5  | -- | --   |
| CakTC38905 | Ca(ICC2/PI489777)SNP_24635 | 431  | C | T | 4  | 3  | -- | --   |
| CakTC29118 | Ca(ICC2/PI489777)SNP_24636 | 369  | A | G | 59 | 68 | -- | --   |
|            | Ca(ICC2/PI489777)SNP_24637 | 918  | T | G | 64 | 38 | -- | --   |

|            |                            |      |   |   |    |    |        |             |
|------------|----------------------------|------|---|---|----|----|--------|-------------|
| CakTC36252 | Ca(ICC2/PI489777)SNP_24638 | 283  | G | C | 11 | 6  | --     | --          |
|            | Ca(ICC2/PI489777)SNP_24639 | 1277 | C | G | 22 | 14 | --     | --          |
|            | Ca(ICC2/PI489777)SNP_24640 | 2603 | T | C | 34 | 15 | --     | --          |
|            | Ca(ICC2/PI489777)SNP_24641 | 2688 | G | T | 55 | 16 | --     | --          |
|            | Ca(ICC2/PI489777)SNP_24642 | 2887 | T | C | 39 | 10 | --     | --          |
| CakTC27320 | Ca(ICC2/PI489777)SNP_24643 | 408  | G | A | 4  | 3  | --     | --          |
|            | Ca(ICC2/PI489777)SNP_24644 | 862  | G | A | 5  | 5  | --     | --          |
|            | Ca(ICC2/PI489777)SNP_24645 | 1003 | A | G | 7  | 5  | --     | --          |
|            | Ca(ICC2/PI489777)SNP_24646 | 1024 | G | A | 7  | 5  | --     | --          |
|            | Ca(ICC2/PI489777)SNP_24647 | 1105 | A | G | 4  | 4  | --     | --          |
| CakTC41847 | Ca(ICC2/PI489777)SNP_24648 | 586  | A | G | 14 | 6  | --     | --          |
| CakTC31530 | Ca(ICC2/PI489777)SNP_24649 | 212  | T | C | 9  | 3  | --     | --          |
|            | Ca(ICC2/PI489777)SNP_24650 | 225  | T | C | 11 | 3  | --     | --          |
| CakTC37340 | Ca(ICC2/PI489777)SNP_24651 | 649  | T | G | 32 | 15 | --     | --          |
|            | Ca(ICC2/PI489777)SNP_24652 | 769  | A | G | 43 | 11 | --     | --          |
|            | Ca(ICC2/PI489777)SNP_24653 | 919  | G | C | 33 | 5  | --     | --          |
| CakTC25721 | Ca(ICC2/PI489777)SNP_24654 | 727  | C | T | 40 | 25 | --     | --          |
|            | Ca(ICC2/PI489777)SNP_24655 | 870  | A | G | 35 | 20 | --     | --          |
|            | Ca(ICC2/PI489777)SNP_24656 | 904  | T | C | 20 | 19 | --     | --          |
|            | Ca(ICC2/PI489777)SNP_24657 | 944  | A | T | 22 | 18 | --     | --          |
|            | Ca(ICC2/PI489777)SNP_24658 | 1186 | T | C | 28 | 12 | --     | --          |
|            | Ca(ICC2/PI489777)SNP_24659 | 1505 | A | G | 42 | 23 | --     | --          |
|            | Ca(ICC2/PI489777)SNP_24660 | 1563 | C | T | 48 | 29 | --     | --          |
|            | Ca(ICC2/PI489777)SNP_24661 | 1721 | C | T | 24 | 31 | --     | --          |
|            | Ca(ICC2/PI489777)SNP_24662 | 2632 | A | G | 22 | 16 | --     | --          |
|            | Ca(ICC2/PI489777)SNP_24663 | 2727 | A | G | 23 | 14 | --     | --          |
|            | Ca(ICC2/PI489777)SNP_24664 | 2926 | T | C | 17 | 14 | --     | --          |
| CakTC37599 | Ca(ICC2/PI489777)SNP_24665 | 651  | G | A | 9  | 19 | --     | --          |
|            | Ca(ICC2/PI489777)SNP_24666 | 738  | C | T | 11 | 14 | --     | --          |
|            | Ca(ICC2/PI489777)SNP_24667 | 754  | A | G | 9  | 13 | --     | --          |
|            | Ca(ICC2/PI489777)SNP_24668 | 807  | T | C | 9  | 10 | --     | --          |
|            | Ca(ICC2/PI489777)SNP_24669 | 840  | A | G | 10 | 8  | --     | --          |
| CakTC27090 | Ca(ICC2/PI489777)SNP_24670 | 170  | T | A | 4  | 6  | --     | --          |
| CakTC28662 | Ca(ICC2/PI489777)SNP_24671 | 23   | T | C | 3  | 6  | --     | --          |
|            | Ca(ICC2/PI489777)SNP_24672 | 27   | T | C | 5  | 7  | --     | --          |
|            | Ca(ICC2/PI489777)SNP_24673 | 624  | T | A | 14 | 14 | --     | --          |
| CakTC30433 | Ca(ICC2/PI489777)SNP_24674 | 492  | C | T | 7  | 10 | --     | --          |
|            | Ca(ICC2/PI489777)SNP_24675 | 542  | T | G | 7  | 12 | --     | --          |
|            | Ca(ICC2/PI489777)SNP_24676 | 575  | C | G | 5  | 12 | --     | --          |
|            | Ca(ICC2/PI489777)SNP_24677 | 724  | G | C | 8  | 9  | --     | --          |
|            | Ca(ICC2/PI489777)SNP_24678 | 1126 | A | G | 6  | 7  | --     | --          |
|            | Ca(ICC2/PI489777)SNP_24679 | 1199 | A | G | 4  | 4  | --     | --          |
|            | Ca(ICC2/PI489777)SNP_24680 | 1540 | C | T | 4  | 4  | --     | --          |
| CakTC41231 | Ca(ICC2/PI489777)SNP_24681 | 590  | G | A | 35 | 35 | --     | --          |
| CakTC33129 | Ca(ICC2/PI489777)SNP_24682 | 1740 | G | A | 8  | 5  | Mature | Leaf        |
|            | Ca(ICC2/PI489777)SNP_24683 | 2132 | G | A | 15 | 5  | Mature | Leaf        |
| CakTC37653 | Ca(ICC2/PI489777)SNP_24684 | 274  | A | C | 21 | 10 | --     | --          |
|            | Ca(ICC2/PI489777)SNP_24685 | 647  | C | T | 22 | 13 | --     | --          |
|            | Ca(ICC2/PI489777)SNP_24686 | 1200 | T | A | 23 | 4  | --     | --          |
| CakTC31809 | Ca(ICC2/PI489777)SNP_24687 | 309  | T | C | 3  | 6  | --     | PHD         |
|            | Ca(ICC2/PI489777)SNP_24688 | 1970 | A | G | 5  | 5  | --     | PHD         |
|            | Ca(ICC2/PI489777)SNP_24689 | 2143 | A | C | 4  | 3  | --     | PHD         |
| CakTC23257 | Ca(ICC2/PI489777)SNP_24690 | 777  | T | C | 13 | 5  | --     | --          |
|            | Ca(ICC2/PI489777)SNP_24691 | 961  | G | A | 14 | 7  | --     | --          |
| CakTC35250 | Ca(ICC2/PI489777)SNP_24692 | 334  | T | C | 7  | 4  | --     | --          |
|            | Ca(ICC2/PI489777)SNP_24693 | 1232 | A | G | 8  | 6  | --     | --          |
|            | Ca(ICC2/PI489777)SNP_24694 | 2518 | T | C | 11 | 7  | --     | --          |
| CakTC38001 | Ca(ICC2/PI489777)SNP_24695 | 532  | G | A | 4  | 7  | --     | --          |
| CakTC10720 | Ca(ICC2/PI489777)SNP_24696 | 1178 | T | G | 7  | 3  | --     | --          |
|            | Ca(ICC2/PI489777)SNP_24697 | 1204 | C | T | 7  | 3  | --     | --          |
| CakTC42449 | Ca(ICC2/PI489777)SNP_24698 | 729  | G | A | 4  | 5  | --     | --          |
|            | Ca(ICC2/PI489777)SNP_24699 | 1136 | C | T | 7  | 3  | --     | --          |
| CakTC12245 | Ca(ICC2/PI489777)SNP_24700 | 200  | A | T | 5  | 3  | --     | --          |
|            | Ca(ICC2/PI489777)SNP_24701 | 247  | C | A | 5  | 3  | --     | --          |
| CakTC34453 | Ca(ICC2/PI489777)SNP_24702 | 1576 | A | G | 4  | 3  | --     | --          |
| CakTC42014 | Ca(ICC2/PI489777)SNP_24703 | 150  | C | T | 4  | 4  | --     | AP2-EREBP   |
|            | Ca(ICC2/PI489777)SNP_24704 | 516  | G | A | 4  | 8  | --     | AP2-EREBP   |
| CakTC41340 | Ca(ICC2/PI489777)SNP_24705 | 873  | G | A | 3  | 6  | --     | --          |
|            | Ca(ICC2/PI489777)SNP_24706 | 1265 | C | G | 3  | 9  | --     | --          |
|            | Ca(ICC2/PI489777)SNP_24707 | 1451 | G | A | 7  | 4  | --     | --          |
| CakTC25798 | Ca(ICC2/PI489777)SNP_24708 | 497  | T | C | 5  | 5  | --     | Bromodomain |
|            | Ca(ICC2/PI489777)SNP_24709 | 723  | A | T | 6  | 3  | --     | Bromodomain |
|            | Ca(ICC2/PI489777)SNP_24710 | 2041 | G | T | 5  | 7  | --     | Bromodomain |
|            | Ca(ICC2/PI489777)SNP_24711 | 2620 | T | C | 9  | 4  | --     | Bromodomain |

|            |                            |      |   |   |     |    |        |             |
|------------|----------------------------|------|---|---|-----|----|--------|-------------|
|            | Ca(ICC2/PI489777)SNP_24712 | 2914 | T | A | 10  | 3  | --     | Bromodomain |
|            | Ca(ICC2/PI489777)SNP_24713 | 3147 | T | G | 4   | 7  | --     | Bromodomain |
| CakTC27397 | Ca(ICC2/PI489777)SNP_24714 | 219  | A | G | 3   | 3  | --     | --          |
| CakTC16908 | Ca(ICC2/PI489777)SNP_24715 | 172  | C | T | 4   | 4  | --     | --          |
|            | Ca(ICC2/PI489777)SNP_24716 | 175  | A | C | 4   | 4  | --     | --          |
| CakTC27896 | Ca(ICC2/PI489777)SNP_24717 | 271  | A | G | 11  | 5  | --     | --          |
|            | Ca(ICC2/PI489777)SNP_24718 | 1090 | T | G | 7   | 3  | --     | --          |
|            | Ca(ICC2/PI489777)SNP_24719 | 1124 | A | G | 6   | 3  | --     | --          |
| CakTC31079 | Ca(ICC2/PI489777)SNP_24720 | 876  | T | C | 78  | 41 | --     | --          |
| CakTC26433 | Ca(ICC2/PI489777)SNP_24721 | 1650 | C | G | 3   | 4  | --     | --          |
|            | Ca(ICC2/PI489777)SNP_24722 | 1807 | A | G | 8   | 4  | --     | --          |
|            | Ca(ICC2/PI489777)SNP_24723 | 1880 | C | A | 11  | 3  | --     | --          |
|            | Ca(ICC2/PI489777)SNP_24724 | 1890 | G | A | 12  | 3  | --     | --          |
|            | Ca(ICC2/PI489777)SNP_24725 | 2322 | T | C | 10  | 6  | --     | --          |
|            | Ca(ICC2/PI489777)SNP_24726 | 2409 | G | C | 9   | 5  | --     | --          |
|            | Ca(ICC2/PI489777)SNP_24727 | 2919 | T | G | 21  | 3  | --     | --          |
| CakTC36397 | Ca(ICC2/PI489777)SNP_24728 | 217  | T | C | 3   | 8  | --     | --          |
|            | Ca(ICC2/PI489777)SNP_24729 | 225  | T | G | 3   | 9  | --     | --          |
|            | Ca(ICC2/PI489777)SNP_24730 | 249  | G | A | 3   | 11 | --     | --          |
| CakTC31610 | Ca(ICC2/PI489777)SNP_24731 | 1628 | C | T | 4   | 3  | Flower | bud         |
| CakTC38669 | Ca(ICC2/PI489777)SNP_24732 | 3392 | A | C | 9   | 3  | --     | --          |
|            | Ca(ICC2/PI489777)SNP_24733 | 3986 | A | G | 6   | 5  | --     | --          |
|            | Ca(ICC2/PI489777)SNP_24734 | 4084 | C | A | 6   | 5  | --     | --          |
| CakTC31581 | Ca(ICC2/PI489777)SNP_24735 | 246  | G | C | 3   | 4  | --     | --          |
|            | Ca(ICC2/PI489777)SNP_24736 | 333  | A | G | 36  | 32 | --     | --          |
| CakTC03554 | Ca(ICC2/PI489777)SNP_24737 | 563  | A | G | 17  | 29 | --     | --          |
| CakTC28060 | Ca(ICC2/PI489777)SNP_24738 | 162  | C | T | 54  | 50 | --     | --          |
|            | Ca(ICC2/PI489777)SNP_24739 | 576  | A | G | 32  | 24 | --     | --          |
|            | Ca(ICC2/PI489777)SNP_24740 | 690  | C | T | 26  | 21 | --     | --          |
| CakTC26122 | Ca(ICC2/PI489777)SNP_24741 | 496  | C | T | 6   | 4  | --     | --          |
|            | Ca(ICC2/PI489777)SNP_24742 | 582  | A | T | 6   | 3  | --     | --          |
| CakTC25789 | Ca(ICC2/PI489777)SNP_24743 | 233  | T | C | 19  | 13 | --     | --          |
|            | Ca(ICC2/PI489777)SNP_24744 | 2030 | A | T | 44  | 6  | --     | --          |
|            | Ca(ICC2/PI489777)SNP_24745 | 3084 | G | A | 16  | 16 | --     | --          |
|            | Ca(ICC2/PI489777)SNP_24746 | 3339 | C | T | 10  | 9  | --     | --          |
| CakTC34616 | Ca(ICC2/PI489777)SNP_24747 | 120  | T | A | 19  | 27 | --     | --          |
| CakTC25994 | Ca(ICC2/PI489777)SNP_24748 | 662  | A | G | 38  | 23 | --     | --          |
| CakTC23542 | Ca(ICC2/PI489777)SNP_24749 | 248  | C | G | 11  | 4  | --     | --          |
|            | Ca(ICC2/PI489777)SNP_24750 | 315  | A | G | 11  | 4  | --     | --          |
|            | Ca(ICC2/PI489777)SNP_24751 | 807  | C | G | 10  | 4  | --     | --          |
|            | Ca(ICC2/PI489777)SNP_24752 | 1421 | G | A | 9   | 12 | --     | --          |
|            | Ca(ICC2/PI489777)SNP_24753 | 1455 | A | C | 8   | 12 | --     | --          |
|            | Ca(ICC2/PI489777)SNP_24754 | 1494 | T | C | 7   | 8  | --     | --          |
| CakTC22786 | Ca(ICC2/PI489777)SNP_24755 | 162  | G | A | 91  | 27 | --     | --          |
|            | Ca(ICC2/PI489777)SNP_24756 | 216  | A | C | 138 | 28 | --     | --          |
| CakTC38535 | Ca(ICC2/PI489777)SNP_24757 | 413  | G | A | 33  | 9  | --     | --          |
|            | Ca(ICC2/PI489777)SNP_24758 | 419  | T | C | 32  | 9  | --     | --          |
|            | Ca(ICC2/PI489777)SNP_24759 | 485  | A | G | 36  | 16 | --     | --          |
|            | Ca(ICC2/PI489777)SNP_24760 | 569  | A | G | 28  | 22 | --     | --          |
| CakTC22368 | Ca(ICC2/PI489777)SNP_24761 | 221  | T | C | 5   | 3  | --     | --          |
|            | Ca(ICC2/PI489777)SNP_24762 | 256  | G | C | 5   | 3  | --     | --          |
|            | Ca(ICC2/PI489777)SNP_24763 | 258  | A | C | 5   | 3  | --     | --          |
| CakTC10426 | Ca(ICC2/PI489777)SNP_24764 | 853  | A | G | 5   | 5  | --     | --          |
| CakTC13102 | Ca(ICC2/PI489777)SNP_24765 | 1087 | T | C | 5   | 3  | --     | --          |
| CakTC32264 | Ca(ICC2/PI489777)SNP_24766 | 1388 | C | G | 5   | 3  | --     | --          |
|            | Ca(ICC2/PI489777)SNP_24767 | 1436 | A | C | 4   | 3  | --     | --          |
| CakTC31742 | Ca(ICC2/PI489777)SNP_24768 | 156  | C | G | 8   | 4  | Flower | bud         |
|            | Ca(ICC2/PI489777)SNP_24769 | 711  | G | C | 3   | 4  | Flower | bud         |
|            | Ca(ICC2/PI489777)SNP_24770 | 737  | G | A | 3   | 3  | Flower | bud         |
| CakTC22912 | Ca(ICC2/PI489777)SNP_24771 | 2629 | T | C | 8   | 4  | --     | --          |
|            | Ca(ICC2/PI489777)SNP_24772 | 2995 | T | C | 26  | 9  | --     | --          |
| CakTC31160 | Ca(ICC2/PI489777)SNP_24773 | 447  | C | T | 3   | 4  | Shoot  | --          |
|            | Ca(ICC2/PI489777)SNP_24774 | 522  | G | A | 3   | 4  | Shoot  | --          |
| CakTC31898 | Ca(ICC2/PI489777)SNP_24775 | 254  | A | G | 6   | 7  | --     | --          |
|            | Ca(ICC2/PI489777)SNP_24776 | 302  | C | T | 7   | 8  | --     | --          |
|            | Ca(ICC2/PI489777)SNP_24777 | 329  | G | A | 8   | 8  | --     | --          |
|            | Ca(ICC2/PI489777)SNP_24778 | 1218 | C | T | 7   | 6  | --     | --          |
|            | Ca(ICC2/PI489777)SNP_24779 | 1263 | C | G | 4   | 7  | --     | --          |
|            | Ca(ICC2/PI489777)SNP_24780 | 1319 | C | T | 4   | 6  | --     | --          |
|            | Ca(ICC2/PI489777)SNP_24781 | 1328 | A | G | 3   | 5  | --     | --          |
|            | Ca(ICC2/PI489777)SNP_24782 | 1367 | T | C | 3   | 5  | --     | --          |
| CakTC36602 | Ca(ICC2/PI489777)SNP_24783 | 295  | T | C | 16  | 4  | --     | --          |
|            | Ca(ICC2/PI489777)SNP_24784 | 310  | C | T | 17  | 4  | --     | --          |
|            | Ca(ICC2/PI489777)SNP_24785 | 319  | T | C | 17  | 4  | --     | --          |

|            |                            |      |   |   |    |    |           |      |
|------------|----------------------------|------|---|---|----|----|-----------|------|
|            | Ca(ICC2/PI489777)SNP_24786 | 325  | C | G | 17 | 4  | --        | --   |
|            | Ca(ICC2/PI489777)SNP_24787 | 460  | C | T | 17 | 3  | --        | --   |
|            | Ca(ICC2/PI489777)SNP_24788 | 490  | T | C | 19 | 3  | --        | --   |
|            | Ca(ICC2/PI489777)SNP_24789 | 1016 | C | T | 22 | 10 | --        | --   |
| CakTC37558 | Ca(ICC2/PI489777)SNP_24790 | 575  | A | T | 8  | 4  | --        | --   |
| CakTC41144 | Ca(ICC2/PI489777)SNP_24791 | 989  | T | C | 6  | 4  | --        | --   |
| CakTC43102 | Ca(ICC2/PI489777)SNP_24792 | 339  | T | C | 67 | 42 | --        | --   |
| CakTC36365 | Ca(ICC2/PI489777)SNP_24793 | 586  | G | A | 4  | 3  | Young_pod | --   |
| CakTC27230 | Ca(ICC2/PI489777)SNP_24794 | 103  | C | T | 5  | 7  | Flower    | bud  |
|            | Ca(ICC2/PI489777)SNP_24795 | 202  | C | T | 6  | 7  | Flower    | bud  |
|            | Ca(ICC2/PI489777)SNP_24796 | 1294 | C | T | 6  | 6  | Flower    | bud  |
|            | Ca(ICC2/PI489777)SNP_24797 | 1299 | A | G | 8  | 5  | Flower    | bud  |
|            | Ca(ICC2/PI489777)SNP_24798 | 1489 | A | C | 6  | 5  | Flower    | bud  |
| CakTC28172 | Ca(ICC2/PI489777)SNP_24799 | 865  | A | C | 3  | 5  | --        | --   |
|            | Ca(ICC2/PI489777)SNP_24800 | 908  | T | C | 5  | 5  | --        | --   |
|            | Ca(ICC2/PI489777)SNP_24801 | 2002 | T | C | 5  | 4  | --        | --   |
|            | Ca(ICC2/PI489777)SNP_24802 | 2003 | T | C | 5  | 4  | --        | --   |
| CakTC08234 | Ca(ICC2/PI489777)SNP_24803 | 418  | C | T | 3  | 33 | --        | --   |
|            | Ca(ICC2/PI489777)SNP_24804 | 748  | T | A | 4  | 29 | --        | --   |
|            | Ca(ICC2/PI489777)SNP_24805 | 778  | G | C | 4  | 27 | --        | --   |
|            | Ca(ICC2/PI489777)SNP_24806 | 785  | G | T | 4  | 25 | --        | --   |
|            | Ca(ICC2/PI489777)SNP_24807 | 988  | A | T | 7  | 47 | --        | --   |
|            | Ca(ICC2/PI489777)SNP_24808 | 992  | C | A | 7  | 44 | --        | --   |
|            | Ca(ICC2/PI489777)SNP_24809 | 1004 | T | C | 6  | 46 | --        | --   |
|            | Ca(ICC2/PI489777)SNP_24810 | 1070 | G | T | 7  | 48 | --        | --   |
|            | Ca(ICC2/PI489777)SNP_24811 | 1197 | C | T | 6  | 44 | --        | --   |
|            | Ca(ICC2/PI489777)SNP_24812 | 1262 | C | T | 4  | 45 | --        | --   |
|            | Ca(ICC2/PI489777)SNP_24813 | 1366 | A | G | 4  | 26 | --        | --   |
|            | Ca(ICC2/PI489777)SNP_24814 | 1367 | T | A | 4  | 23 | --        | --   |
| CakTC37821 | Ca(ICC2/PI489777)SNP_24815 | 32   | C | T | 7  | 7  | --        | --   |
|            | Ca(ICC2/PI489777)SNP_24816 | 339  | A | T | 15 | 11 | --        | --   |
|            | Ca(ICC2/PI489777)SNP_24817 | 340  | G | A | 16 | 11 | --        | --   |
|            | Ca(ICC2/PI489777)SNP_24818 | 421  | C | G | 16 | 12 | --        | --   |
|            | Ca(ICC2/PI489777)SNP_24819 | 424  | T | C | 17 | 11 | --        | --   |
|            | Ca(ICC2/PI489777)SNP_24820 | 475  | C | T | 15 | 13 | --        | --   |
|            | Ca(ICC2/PI489777)SNP_24821 | 565  | G | A | 17 | 15 | --        | --   |
|            | Ca(ICC2/PI489777)SNP_24822 | 571  | T | G | 18 | 11 | --        | --   |
|            | Ca(ICC2/PI489777)SNP_24823 | 592  | G | T | 15 | 13 | --        | --   |
|            | Ca(ICC2/PI489777)SNP_24824 | 703  | T | A | 17 | 20 | --        | --   |
|            | Ca(ICC2/PI489777)SNP_24825 | 956  | G | A | 15 | 19 | --        | --   |
|            | Ca(ICC2/PI489777)SNP_24826 | 1270 | C | T | 26 | 20 | --        | --   |
|            | Ca(ICC2/PI489777)SNP_24827 | 1328 | A | G | 22 | 9  | --        | --   |
| CakTC11469 | Ca(ICC2/PI489777)SNP_24828 | 496  | A | G | 8  | 6  | --        | --   |
| CakTC27781 | Ca(ICC2/PI489777)SNP_24829 | 340  | C | G | 26 | 18 | --        | --   |
|            | Ca(ICC2/PI489777)SNP_24830 | 476  | C | A | 32 | 17 | --        | --   |
|            | Ca(ICC2/PI489777)SNP_24831 | 993  | G | C | 10 | 5  | --        | --   |
|            | Ca(ICC2/PI489777)SNP_24832 | 1063 | C | T | 6  | 5  | --        | --   |
| CakTC10705 | Ca(ICC2/PI489777)SNP_24833 | 716  | A | G | 10 | 5  | --        | --   |
|            | Ca(ICC2/PI489777)SNP_24834 | 846  | C | T | 7  | 4  | --        | --   |
|            | Ca(ICC2/PI489777)SNP_24835 | 1728 | C | T | 15 | 9  | --        | --   |
|            | Ca(ICC2/PI489777)SNP_24836 | 1807 | A | T | 19 | 7  | --        | --   |
|            | Ca(ICC2/PI489777)SNP_24837 | 1961 | C | G | 33 | 12 | --        | --   |
|            | Ca(ICC2/PI489777)SNP_24838 | 1971 | G | A | 35 | 11 | --        | --   |
|            | Ca(ICC2/PI489777)SNP_24839 | 2070 | A | G | 36 | 11 | --        | --   |
|            | Ca(ICC2/PI489777)SNP_24840 | 2136 | A | C | 36 | 12 | --        | --   |
|            | Ca(ICC2/PI489777)SNP_24841 | 2148 | G | A | 35 | 12 | --        | --   |
|            | Ca(ICC2/PI489777)SNP_24842 | 2172 | G | A | 35 | 10 | --        | --   |
|            | Ca(ICC2/PI489777)SNP_24843 | 2394 | C | T | 15 | 8  | --        | --   |
|            | Ca(ICC2/PI489777)SNP_24844 | 2412 | G | A | 19 | 7  | --        | --   |
|            | Ca(ICC2/PI489777)SNP_24845 | 2493 | T | C | 15 | 5  | --        | --   |
|            | Ca(ICC2/PI489777)SNP_24846 | 2499 | T | G | 17 | 6  | --        | --   |
|            | Ca(ICC2/PI489777)SNP_24847 | 2523 | A | C | 15 | 6  | --        | --   |
| CakTC37324 | Ca(ICC2/PI489777)SNP_24848 | 973  | C | T | 6  | 4  | --        | --   |
| CakTC41306 | Ca(ICC2/PI489777)SNP_24849 | 588  | C | T | 4  | 3  | --        | --   |
| CakTC43278 | Ca(ICC2/PI489777)SNP_24850 | 238  | A | T | 85 | 34 | --        | --   |
|            | Ca(ICC2/PI489777)SNP_24851 | 437  | G | A | 84 | 43 | --        | --   |
|            | Ca(ICC2/PI489777)SNP_24852 | 443  | A | T | 77 | 43 | --        | --   |
|            | Ca(ICC2/PI489777)SNP_24853 | 519  | C | T | 49 | 42 | --        | --   |
|            | Ca(ICC2/PI489777)SNP_24854 | 587  | T | C | 28 | 23 | --        | --   |
|            | Ca(ICC2/PI489777)SNP_24855 | 602  | T | C | 25 | 27 | --        | --   |
|            | Ca(ICC2/PI489777)SNP_24856 | 605  | G | A | 26 | 28 | --        | --   |
|            | Ca(ICC2/PI489777)SNP_24857 | 697  | G | A | 24 | 24 | --        | --   |
| CakTC26394 | Ca(ICC2/PI489777)SNP_24858 | 222  | C | T | 8  | 23 | --        | CCHC |
|            | Ca(ICC2/PI489777)SNP_24859 | 294  | C | T | 14 | 39 | --        | CCHC |



|            |                            |      |   |   |    |    |           |       |
|------------|----------------------------|------|---|---|----|----|-----------|-------|
|            | Ca(ICC2/PI489777)SNP_24860 | 342  | T | C | 27 | 55 | --        | CCHC  |
| CakTC41827 | Ca(ICC2/PI489777)SNP_24861 | 481  | G | A | 6  | 7  | --        | --    |
|            | Ca(ICC2/PI489777)SNP_24862 | 569  | T | C | 6  | 7  | --        | --    |
| CakTC25562 | Ca(ICC2/PI489777)SNP_24863 | 389  | T | C | 58 | 33 | --        | --    |
|            | Ca(ICC2/PI489777)SNP_24864 | 501  | A | G | 64 | 45 | --        | --    |
|            | Ca(ICC2/PI489777)SNP_24865 | 1302 | G | A | 69 | 41 | --        | --    |
| CakTC39247 | Ca(ICC2/PI489777)SNP_24866 | 400  | G | C | 21 | 31 | --        | --    |
|            | Ca(ICC2/PI489777)SNP_24867 | 432  | A | C | 17 | 24 | --        | --    |
|            | Ca(ICC2/PI489777)SNP_24868 | 475  | C | G | 9  | 23 | --        | --    |
|            | Ca(ICC2/PI489777)SNP_24869 | 619  | G | T | 7  | 26 | --        | --    |
|            | Ca(ICC2/PI489777)SNP_24870 | 682  | G | A | 6  | 26 | --        | --    |
|            | Ca(ICC2/PI489777)SNP_24871 | 1246 | G | A | 4  | 11 | --        | --    |
|            | Ca(ICC2/PI489777)SNP_24872 | 1408 | G | A | 3  | 6  | --        | --    |
|            | Ca(ICC2/PI489777)SNP_24873 | 1442 | T | G | 4  | 7  | --        | --    |
| CakTC23466 | Ca(ICC2/PI489777)SNP_24874 | 285  | T | C | 43 | 25 | --        | --    |
| CakTC43381 | Ca(ICC2/PI489777)SNP_24875 | 310  | C | T | 14 | 15 | --        | --    |
|            | Ca(ICC2/PI489777)SNP_24876 | 316  | T | A | 13 | 15 | --        | --    |
|            | Ca(ICC2/PI489777)SNP_24877 | 630  | C | T | 41 | 24 | --        | --    |
|            | Ca(ICC2/PI489777)SNP_24878 | 1597 | C | G | 38 | 23 | --        | --    |
| CakTC09336 | Ca(ICC2/PI489777)SNP_24879 | 202  | T | A | 7  | 5  | --        | --    |
|            | Ca(ICC2/PI489777)SNP_24880 | 234  | G | A | 9  | 5  | --        | --    |
|            | Ca(ICC2/PI489777)SNP_24881 | 471  | C | T | 6  | 5  | --        | --    |
|            | Ca(ICC2/PI489777)SNP_24882 | 1085 | T | G | 6  | 10 | --        | --    |
| CakTC28359 | Ca(ICC2/PI489777)SNP_24883 | 186  | A | G | 18 | 7  | --        | --    |
| CakTC31596 | Ca(ICC2/PI489777)SNP_24884 | 350  | G | A | 7  | 7  | --        | --    |
| CakTC39253 | Ca(ICC2/PI489777)SNP_24885 | 965  | G | A | 26 | 16 | --        | --    |
|            | Ca(ICC2/PI489777)SNP_24886 | 967  | T | G | 25 | 13 | --        | --    |
|            | Ca(ICC2/PI489777)SNP_24887 | 1190 | G | A | 37 | 14 | --        | --    |
|            | Ca(ICC2/PI489777)SNP_24888 | 1292 | G | A | 37 | 15 | --        | --    |
|            | Ca(ICC2/PI489777)SNP_24889 | 1352 | A | T | 35 | 14 | --        | --    |
|            | Ca(ICC2/PI489777)SNP_24890 | 1442 | G | C | 28 | 12 | --        | --    |
|            | Ca(ICC2/PI489777)SNP_24891 | 1501 | A | G | 8  | 4  | --        | --    |
| CakTC41733 | Ca(ICC2/PI489777)SNP_24892 | 551  | C | T | 6  | 3  | --        | --    |
|            | Ca(ICC2/PI489777)SNP_24893 | 623  | C | T | 9  | 3  | --        | --    |
|            | Ca(ICC2/PI489777)SNP_24894 | 1229 | G | A | 7  | 10 | --        | --    |
|            | Ca(ICC2/PI489777)SNP_24895 | 2258 | G | A | 4  | 6  | --        | --    |
| CakTC06743 | Ca(ICC2/PI489777)SNP_24896 | 531  | A | G | 11 | 9  | --        | --    |
| CakTC36010 | Ca(ICC2/PI489777)SNP_24897 | 1478 | G | C | 5  | 7  | --        | CAMTA |
|            | Ca(ICC2/PI489777)SNP_24898 | 1601 | G | A | 15 | 7  | --        | CAMTA |
|            | Ca(ICC2/PI489777)SNP_24899 | 2522 | A | G | 14 | 10 | --        | CAMTA |
|            | Ca(ICC2/PI489777)SNP_24900 | 2690 | A | G | 13 | 6  | --        | CAMTA |
|            | Ca(ICC2/PI489777)SNP_24901 | 2975 | A | G | 17 | 10 | --        | CAMTA |
|            | Ca(ICC2/PI489777)SNP_24902 | 3139 | C | G | 13 | 6  | --        | CAMTA |
| CakTC24664 | Ca(ICC2/PI489777)SNP_24903 | 1283 | G | T | 16 | 8  | --        | --    |
| CakTC39508 | Ca(ICC2/PI489777)SNP_24904 | 253  | T | C | 13 | 6  | --        | --    |
|            | Ca(ICC2/PI489777)SNP_24905 | 1110 | T | A | 22 | 12 | --        | --    |
|            | Ca(ICC2/PI489777)SNP_24906 | 1231 | T | A | 16 | 5  | --        | --    |
| CakTC40415 | Ca(ICC2/PI489777)SNP_24907 | 1078 | T | C | 4  | 7  | --        | --    |
|            | Ca(ICC2/PI489777)SNP_24908 | 1268 | G | C | 10 | 4  | --        | --    |
|            | Ca(ICC2/PI489777)SNP_24909 | 1365 | T | C | 9  | 3  | --        | --    |
| CakTC30510 | Ca(ICC2/PI489777)SNP_24910 | 237  | C | A | 5  | 6  | --        | --    |
|            | Ca(ICC2/PI489777)SNP_24911 | 240  | A | G | 5  | 6  | --        | --    |
|            | Ca(ICC2/PI489777)SNP_24912 | 1408 | G | A | 9  | 4  | --        | --    |
| CakTC40856 | Ca(ICC2/PI489777)SNP_24913 | 281  | G | A | 9  | 4  | --        | --    |
|            | Ca(ICC2/PI489777)SNP_24914 | 787  | T | C | 8  | 3  | --        | --    |
|            | Ca(ICC2/PI489777)SNP_24915 | 895  | C | T | 8  | 6  | --        | --    |
|            | Ca(ICC2/PI489777)SNP_24916 | 897  | C | G | 8  | 5  | --        | --    |
|            | Ca(ICC2/PI489777)SNP_24917 | 1255 | C | T | 9  | 8  | --        | --    |
| CakTC26649 | Ca(ICC2/PI489777)SNP_24918 | 2687 | C | T | 3  | 4  | --        | --    |
|            | Ca(ICC2/PI489777)SNP_24919 | 3845 | G | T | 4  | 4  | --        | --    |
|            | Ca(ICC2/PI489777)SNP_24920 | 4001 | A | G | 4  | 6  | --        | --    |
| CakTC38856 | Ca(ICC2/PI489777)SNP_24921 | 139  | C | A | 4  | 3  | --        | --    |
|            | Ca(ICC2/PI489777)SNP_24922 | 627  | A | G | 9  | 6  | --        | --    |
|            | Ca(ICC2/PI489777)SNP_24923 | 696  | C | G | 10 | 5  | --        | --    |
| CakTC01737 | Ca(ICC2/PI489777)SNP_24924 | 149  | T | C | 15 | 12 | --        | --    |
|            | Ca(ICC2/PI489777)SNP_24925 | 2033 | C | T | 26 | 16 | --        | --    |
|            | Ca(ICC2/PI489777)SNP_24926 | 2135 | T | C | 18 | 18 | --        | --    |
|            | Ca(ICC2/PI489777)SNP_24927 | 2243 | G | A | 20 | 9  | --        | --    |
|            | Ca(ICC2/PI489777)SNP_24928 | 2402 | G | A | 21 | 3  | --        | --    |
|            | Ca(ICC2/PI489777)SNP_24929 | 2822 | T | A | 16 | 7  | --        | --    |
| CakTC22591 | Ca(ICC2/PI489777)SNP_24930 | 3342 | T | C | 3  | 3  | Young_pod | --    |
|            | Ca(ICC2/PI489777)SNP_24931 | 3367 | G | T | 4  | 4  | Young_pod | --    |
|            | Ca(ICC2/PI489777)SNP_24932 | 3379 | G | C | 4  | 4  | Young_pod | --    |
|            | Ca(ICC2/PI489777)SNP_24933 | 3465 | C | T | 4  | 5  | Young_pod | --    |

|            |                            |      |   |   |     |     |           |     |
|------------|----------------------------|------|---|---|-----|-----|-----------|-----|
|            | Ca(ICC2/PI489777)SNP_24934 | 3563 | C | T | 4   | 3   | Young_pod | --  |
| CakTC30519 | Ca(ICC2/PI489777)SNP_24935 | 2375 | A | C | 13  | 11  | Flower    | bud |
|            | Ca(ICC2/PI489777)SNP_24936 | 3195 | A | G | 15  | 7   | Flower    | bud |
| CakTC41855 | Ca(ICC2/PI489777)SNP_24937 | 1256 | C | G | 4   | 5   | --        | --  |
|            | Ca(ICC2/PI489777)SNP_24938 | 1360 | A | T | 4   | 6   | --        | --  |
| CakTC43212 | Ca(ICC2/PI489777)SNP_24939 | 759  | C | G | 3   | 8   | --        | HB  |
| CakTC42150 | Ca(ICC2/PI489777)SNP_24940 | 434  | C | A | 6   | 8   | --        | --  |
|            | Ca(ICC2/PI489777)SNP_24941 | 580  | G | A | 11  | 7   | --        | --  |
|            | Ca(ICC2/PI489777)SNP_24942 | 700  | A | C | 16  | 6   | --        | --  |
| CakTC32916 | Ca(ICC2/PI489777)SNP_24943 | 213  | A | G | 6   | 3   | --        | --  |
|            | Ca(ICC2/PI489777)SNP_24944 | 218  | G | C | 6   | 3   | --        | --  |
|            | Ca(ICC2/PI489777)SNP_24945 | 442  | C | G | 5   | 3   | --        | --  |
| CakTC07094 | Ca(ICC2/PI489777)SNP_24946 | 1825 | C | G | 3   | 4   | --        | --  |
| CakTC40847 | Ca(ICC2/PI489777)SNP_24947 | 223  | A | G | 66  | 123 | --        | --  |
|            | Ca(ICC2/PI489777)SNP_24948 | 361  | A | G | 74  | 158 | --        | --  |
|            | Ca(ICC2/PI489777)SNP_24949 | 539  | C | G | 59  | 115 | --        | --  |
| CakTC26680 | Ca(ICC2/PI489777)SNP_24950 | 765  | G | C | 7   | 3   | --        | --  |
| CakTC39695 | Ca(ICC2/PI489777)SNP_24951 | 430  | A | G | 3   | 3   | --        | --  |
|            | Ca(ICC2/PI489777)SNP_24952 | 612  | T | C | 5   | 3   | --        | --  |
| CakTC33517 | Ca(ICC2/PI489777)SNP_24953 | 185  | G | T | 28  | 19  | --        | --  |
|            | Ca(ICC2/PI489777)SNP_24954 | 373  | T | A | 72  | 37  | --        | --  |
| CakTC36586 | Ca(ICC2/PI489777)SNP_24955 | 1946 | T | C | 9   | 6   | --        | --  |
|            | Ca(ICC2/PI489777)SNP_24956 | 2387 | C | T | 21  | 14  | --        | --  |
|            | Ca(ICC2/PI489777)SNP_24957 | 2507 | C | T | 16  | 13  | --        | --  |
| CakTC40068 | Ca(ICC2/PI489777)SNP_24958 | 293  | T | A | 7   | 8   | --        | --  |
|            | Ca(ICC2/PI489777)SNP_24959 | 341  | T | C | 8   | 8   | --        | --  |
|            | Ca(ICC2/PI489777)SNP_24960 | 398  | G | A | 8   | 8   | --        | --  |
|            | Ca(ICC2/PI489777)SNP_24961 | 608  | G | A | 10  | 10  | --        | --  |
| CakTC25640 | Ca(ICC2/PI489777)SNP_24962 | 575  | T | C | 31  | 13  | --        | --  |
|            | Ca(ICC2/PI489777)SNP_24963 | 728  | T | C | 43  | 23  | --        | --  |
| CakTC10444 | Ca(ICC2/PI489777)SNP_24964 | 244  | C | T | 8   | 4   | --        | --  |
|            | Ca(ICC2/PI489777)SNP_24965 | 628  | G | C | 9   | 5   | --        | --  |
| CakTC38819 | Ca(ICC2/PI489777)SNP_24966 | 1277 | A | G | 3   | 3   | --        | --  |
|            | Ca(ICC2/PI489777)SNP_24967 | 1394 | T | A | 3   | 3   | --        | --  |
| CakTC42457 | Ca(ICC2/PI489777)SNP_24968 | 287  | G | T | 5   | 11  | Young_pod | --  |
|            | Ca(ICC2/PI489777)SNP_24969 | 1007 | T | A | 5   | 4   | Young_pod | --  |
|            | Ca(ICC2/PI489777)SNP_24970 | 1097 | T | C | 6   | 3   | Young_pod | --  |
|            | Ca(ICC2/PI489777)SNP_24971 | 1418 | T | C | 6   | 8   | Young_pod | --  |
|            | Ca(ICC2/PI489777)SNP_24972 | 1454 | G | A | 5   | 10  | Young_pod | --  |
| CakTC36378 | Ca(ICC2/PI489777)SNP_24973 | 483  | G | A | 105 | 77  | --        | --  |
|            | Ca(ICC2/PI489777)SNP_24974 | 786  | A | G | 104 | 53  | --        | --  |
|            | Ca(ICC2/PI489777)SNP_24975 | 854  | T | C | 101 | 45  | --        | --  |
|            | Ca(ICC2/PI489777)SNP_24976 | 1031 | A | G | 96  | 38  | --        | --  |
|            | Ca(ICC2/PI489777)SNP_24977 | 1679 | G | A | 89  | 37  | --        | --  |
|            | Ca(ICC2/PI489777)SNP_24978 | 2036 | A | G | 109 | 67  | --        | --  |
|            | Ca(ICC2/PI489777)SNP_24979 | 2773 | C | G | 81  | 41  | --        | --  |
|            | Ca(ICC2/PI489777)SNP_24980 | 2800 | A | T | 77  | 39  | --        | --  |
|            | Ca(ICC2/PI489777)SNP_24981 | 2965 | C | G | 22  | 4   | --        | --  |
| CakTC06077 | Ca(ICC2/PI489777)SNP_24982 | 516  | T | G | 12  | 14  | --        | --  |
|            | Ca(ICC2/PI489777)SNP_24983 | 546  | G | A | 12  | 12  | --        | --  |
|            | Ca(ICC2/PI489777)SNP_24984 | 616  | G | C | 10  | 8   | --        | --  |
| CakTC34207 | Ca(ICC2/PI489777)SNP_24985 | 235  | A | G | 5   | 12  | --        | --  |
|            | Ca(ICC2/PI489777)SNP_24986 | 555  | T | C | 20  | 17  | --        | --  |
|            | Ca(ICC2/PI489777)SNP_24987 | 1477 | C | A | 16  | 10  | --        | --  |
|            | Ca(ICC2/PI489777)SNP_24988 | 2021 | A | C | 9   | 5   | --        | --  |
| CakTC25956 | Ca(ICC2/PI489777)SNP_24989 | 716  | C | T | 41  | 8   | --        | --  |
|            | Ca(ICC2/PI489777)SNP_24990 | 887  | C | T | 39  | 6   | --        | --  |
|            | Ca(ICC2/PI489777)SNP_24991 | 1457 | C | A | 50  | 24  | --        | --  |
|            | Ca(ICC2/PI489777)SNP_24992 | 1574 | A | T | 31  | 13  | --        | --  |
|            | Ca(ICC2/PI489777)SNP_24993 | 1683 | T | C | 16  | 4   | --        | --  |
| CakTC39438 | Ca(ICC2/PI489777)SNP_24994 | 358  | T | C | 32  | 16  | --        | --  |
|            | Ca(ICC2/PI489777)SNP_24995 | 524  | A | C | 11  | 19  | --        | --  |
|            | Ca(ICC2/PI489777)SNP_24996 | 1039 | A | G | 25  | 20  | --        | --  |
|            | Ca(ICC2/PI489777)SNP_24997 | 1418 | A | G | 9   | 4   | --        | --  |
| CakTC42462 | Ca(ICC2/PI489777)SNP_24998 | 563  | G | T | 4   | 6   | --        | --  |
| CakTC27405 | Ca(ICC2/PI489777)SNP_24999 | 317  | A | C | 10  | 6   | --        | --  |
|            | Ca(ICC2/PI489777)SNP_25000 | 383  | A | C | 11  | 9   | --        | --  |
|            | Ca(ICC2/PI489777)SNP_25001 | 3258 | C | A | 11  | 3   | --        | --  |
|            | Ca(ICC2/PI489777)SNP_25002 | 3707 | G | A | 5   | 5   | --        | --  |
| CakTC27089 | Ca(ICC2/PI489777)SNP_25003 | 225  | T | A | 17  | 25  | --        | --  |
|            | Ca(ICC2/PI489777)SNP_25004 | 761  | A | G | 4   | 4   | --        | --  |
|            | Ca(ICC2/PI489777)SNP_25005 | 870  | A | T | 4   | 4   | --        | --  |
| CakTC38781 | Ca(ICC2/PI489777)SNP_25006 | 44   | T | C | 4   | 9   | --        | --  |
|            | Ca(ICC2/PI489777)SNP_25007 | 98   | T | C | 5   | 11  | --        | --  |

|            |                             |      |   |   |    |    |       |             |
|------------|-----------------------------|------|---|---|----|----|-------|-------------|
|            | Ca(ICCV2/PI489777)SNP_25008 | 169  | G | C | 9  | 19 | --    | --          |
| CakTC28346 | Ca(ICCV2/PI489777)SNP_25009 | 144  | G | A | 26 | 8  | --    | --          |
|            | Ca(ICCV2/PI489777)SNP_25010 | 152  | A | C | 28 | 10 | --    | --          |
|            | Ca(ICCV2/PI489777)SNP_25011 | 712  | A | T | 38 | 22 | --    | --          |
| CakTC40396 | Ca(ICCV2/PI489777)SNP_25012 | 350  | C | T | 9  | 6  | --    | --          |
|            | Ca(ICCV2/PI489777)SNP_25013 | 398  | T | C | 12 | 5  | --    | --          |
|            | Ca(ICCV2/PI489777)SNP_25014 | 584  | T | C | 11 | 4  | --    | --          |
| CakTC24605 | Ca(ICCV2/PI489777)SNP_25015 | 596  | G | A | 34 | 21 | --    | --          |
|            | Ca(ICCV2/PI489777)SNP_25016 | 725  | T | A | 50 | 19 | --    | --          |
|            | Ca(ICCV2/PI489777)SNP_25017 | 854  | A | G | 48 | 11 | --    | --          |
|            | Ca(ICCV2/PI489777)SNP_25018 | 1081 | C | G | 27 | 8  | --    | --          |
|            | Ca(ICCV2/PI489777)SNP_25019 | 1090 | C | G | 23 | 7  | --    | --          |
|            | Ca(ICCV2/PI489777)SNP_25020 | 1102 | C | G | 16 | 4  | --    | --          |
| CakTC04045 | Ca(ICCV2/PI489777)SNP_25021 | 174  | A | C | 3  | 3  | --    | --          |
|            | Ca(ICCV2/PI489777)SNP_25022 | 246  | C | T | 3  | 3  | --    | --          |
|            | Ca(ICCV2/PI489777)SNP_25023 | 346  | A | G | 5  | 4  | --    | --          |
|            | Ca(ICCV2/PI489777)SNP_25024 | 901  | A | G | 3  | 3  | --    | --          |
| CakTC05031 | Ca(ICCV2/PI489777)SNP_25025 | 794  | T | C | 5  | 5  | --    | --          |
|            | Ca(ICCV2/PI489777)SNP_25026 | 831  | A | G | 5  | 4  | --    | --          |
|            | Ca(ICCV2/PI489777)SNP_25027 | 876  | T | C | 6  | 5  | --    | --          |
|            | Ca(ICCV2/PI489777)SNP_25028 | 1386 | C | T | 8  | 3  | --    | --          |
| CakTC31924 | Ca(ICCV2/PI489777)SNP_25029 | 1343 | G | T | 4  | 15 | --    | --          |
| CakTC41926 | Ca(ICCV2/PI489777)SNP_25030 | 130  | C | G | 23 | 7  | --    | --          |
|            | Ca(ICCV2/PI489777)SNP_25031 | 1126 | A | C | 20 | 7  | --    | --          |
| CakTC16280 | Ca(ICCV2/PI489777)SNP_25032 | 304  | G | A | 3  | 4  | --    | --          |
|            | Ca(ICCV2/PI489777)SNP_25033 | 313  | G | A | 3  | 4  | --    | --          |
|            | Ca(ICCV2/PI489777)SNP_25034 | 347  | T | A | 3  | 4  | --    | --          |
| CakTC29149 | Ca(ICCV2/PI489777)SNP_25035 | 277  | T | C | 4  | 15 | --    | --          |
|            | Ca(ICCV2/PI489777)SNP_25036 | 316  | T | C | 5  | 19 | --    | --          |
|            | Ca(ICCV2/PI489777)SNP_25037 | 406  | T | C | 6  | 22 | --    | --          |
|            | Ca(ICCV2/PI489777)SNP_25038 | 472  | G | A | 6  | 25 | --    | --          |
|            | Ca(ICCV2/PI489777)SNP_25039 | 541  | A | G | 9  | 27 | --    | --          |
|            | Ca(ICCV2/PI489777)SNP_25040 | 547  | A | C | 7  | 27 | --    | --          |
|            | Ca(ICCV2/PI489777)SNP_25041 | 625  | A | T | 8  | 19 | --    | --          |
|            | Ca(ICCV2/PI489777)SNP_25042 | 667  | G | T | 7  | 17 | --    | --          |
|            | Ca(ICCV2/PI489777)SNP_25043 | 673  | T | A | 7  | 19 | --    | --          |
|            | Ca(ICCV2/PI489777)SNP_25044 | 718  | C | T | 8  | 14 | --    | --          |
|            | Ca(ICCV2/PI489777)SNP_25045 | 847  | A | T | 13 | 33 | --    | --          |
|            | Ca(ICCV2/PI489777)SNP_25046 | 850  | G | A | 13 | 33 | --    | --          |
|            | Ca(ICCV2/PI489777)SNP_25047 | 961  | C | A | 12 | 31 | --    | --          |
|            | Ca(ICCV2/PI489777)SNP_25048 | 1068 | T | A | 13 | 31 | --    | --          |
|            | Ca(ICCV2/PI489777)SNP_25049 | 1138 | A | G | 3  | 10 | --    | --          |
| CakTC42732 | Ca(ICCV2/PI489777)SNP_25050 | 970  | A | G | 42 | 20 | --    | BSD         |
|            | Ca(ICCV2/PI489777)SNP_25051 | 1209 | C | T | 31 | 34 | --    | BSD         |
| CakTC02412 | Ca(ICCV2/PI489777)SNP_25052 | 386  | C | T | 3  | 5  | --    | --          |
|            | Ca(ICCV2/PI489777)SNP_25053 | 980  | C | T | 4  | 4  | --    | --          |
|            | Ca(ICCV2/PI489777)SNP_25054 | 1079 | T | G | 6  | 4  | --    | --          |
|            | Ca(ICCV2/PI489777)SNP_25055 | 1337 | C | T | 8  | 8  | --    | --          |
|            | Ca(ICCV2/PI489777)SNP_25056 | 1531 | T | C | 8  | 6  | --    | --          |
|            | Ca(ICCV2/PI489777)SNP_25057 | 1545 | G | T | 10 | 6  | --    | --          |
| CakTC30336 | Ca(ICCV2/PI489777)SNP_25058 | 245  | C | T | 3  | 5  | --    | --          |
|            | Ca(ICCV2/PI489777)SNP_25059 | 255  | A | C | 5  | 6  | --    | --          |
|            | Ca(ICCV2/PI489777)SNP_25060 | 812  | A | G | 5  | 6  | --    | --          |
|            | Ca(ICCV2/PI489777)SNP_25061 | 814  | G | A | 5  | 6  | --    | --          |
| CakTC41834 | Ca(ICCV2/PI489777)SNP_25062 | 283  | G | T | 6  | 7  | --    | --          |
| CakTC42698 | Ca(ICCV2/PI489777)SNP_25063 | 243  | C | T | 9  | 4  | --    | MYB-related |
|            | Ca(ICCV2/PI489777)SNP_25064 | 352  | T | C | 13 | 5  | --    | MYB-related |
|            | Ca(ICCV2/PI489777)SNP_25065 | 1327 | C | T | 13 | 4  | --    | MYB-related |
| CakTC28121 | Ca(ICCV2/PI489777)SNP_25066 | 721  | A | G | 19 | 11 | --    | --          |
|            | Ca(ICCV2/PI489777)SNP_25067 | 1582 | G | A | 12 | 5  | --    | --          |
|            | Ca(ICCV2/PI489777)SNP_25068 | 1585 | A | G | 12 | 6  | --    | --          |
| CakTC29878 | Ca(ICCV2/PI489777)SNP_25069 | 557  | C | A | 11 | 3  | Shoot | --          |
|            | Ca(ICCV2/PI489777)SNP_25070 | 643  | T | A | 16 | 9  | Shoot | --          |
|            | Ca(ICCV2/PI489777)SNP_25071 | 847  | A | G | 19 | 13 | Shoot | --          |
|            | Ca(ICCV2/PI489777)SNP_25072 | 1543 | T | C | 25 | 13 | Shoot | --          |
|            | Ca(ICCV2/PI489777)SNP_25073 | 1954 | A | G | 12 | 14 | Shoot | --          |
|            | Ca(ICCV2/PI489777)SNP_25074 | 2128 | G | A | 14 | 14 | Shoot | --          |
| CakTC27141 | Ca(ICCV2/PI489777)SNP_25075 | 248  | T | C | 8  | 49 | --    | --          |
| CakTC27218 | Ca(ICCV2/PI489777)SNP_25076 | 615  | T | C | 9  | 10 | --    | --          |
|            | Ca(ICCV2/PI489777)SNP_25077 | 1147 | G | A | 25 | 5  | --    | --          |
|            | Ca(ICCV2/PI489777)SNP_25078 | 1222 | A | G | 24 | 5  | --    | --          |
|            | Ca(ICCV2/PI489777)SNP_25079 | 1259 | C | T | 23 | 7  | --    | --          |
|            | Ca(ICCV2/PI489777)SNP_25080 | 1260 | C | G | 23 | 7  | --    | --          |
|            | Ca(ICCV2/PI489777)SNP_25081 | 1294 | C | T | 29 | 9  | --    | --          |

|            |                            |      |   |   |     |    |        |     |
|------------|----------------------------|------|---|---|-----|----|--------|-----|
|            | Ca(ICC2/P1489777)SNP_25082 | 1347 | A | T | 36  | 12 | --     | --  |
|            | Ca(ICC2/P1489777)SNP_25083 | 2881 | C | A | 15  | 11 | --     | --  |
|            | Ca(ICC2/P1489777)SNP_25084 | 2944 | G | A | 14  | 11 | --     | --  |
|            | Ca(ICC2/P1489777)SNP_25085 | 3163 | A | G | 10  | 8  | --     | --  |
|            | Ca(ICC2/P1489777)SNP_25086 | 3569 | A | T | 9   | 6  | --     | --  |
| CakTC39057 | Ca(ICC2/P1489777)SNP_25087 | 681  | A | T | 4   | 7  | --     | --  |
|            | Ca(ICC2/P1489777)SNP_25088 | 900  | T | A | 5   | 13 | --     | --  |
| CakTC25901 | Ca(ICC2/P1489777)SNP_25089 | 69   | A | C | 3   | 10 | Flower | bud |
|            | Ca(ICC2/P1489777)SNP_25090 | 199  | G | A | 5   | 11 | Flower | bud |
| CakTC43322 | Ca(ICC2/P1489777)SNP_25091 | 32   | G | A | 8   | 3  | --     | --  |
|            | Ca(ICC2/P1489777)SNP_25092 | 625  | C | T | 15  | 6  | --     | --  |
| CakTC36052 | Ca(ICC2/P1489777)SNP_25093 | 1842 | T | C | 7   | 3  | --     | --  |
| CakTC36171 | Ca(ICC2/P1489777)SNP_25094 | 184  | C | T | 5   | 5  | --     | --  |
|            | Ca(ICC2/P1489777)SNP_25095 | 247  | A | G | 5   | 6  | --     | --  |
|            | Ca(ICC2/P1489777)SNP_25096 | 1606 | G | A | 8   | 3  | --     | --  |
| CakTC11788 | Ca(ICC2/P1489777)SNP_25097 | 330  | T | C | 9   | 3  | --     | --  |
| CakTC41346 | Ca(ICC2/P1489777)SNP_25098 | 612  | A | G | 46  | 15 | --     | --  |
|            | Ca(ICC2/P1489777)SNP_25099 | 641  | A | G | 45  | 15 | --     | --  |
|            | Ca(ICC2/P1489777)SNP_25100 | 663  | G | C | 43  | 16 | --     | --  |
|            | Ca(ICC2/P1489777)SNP_25101 | 678  | A | G | 46  | 16 | --     | --  |
|            | Ca(ICC2/P1489777)SNP_25102 | 752  | G | C | 30  | 13 | --     | --  |
|            | Ca(ICC2/P1489777)SNP_25103 | 782  | T | C | 30  | 11 | --     | --  |
|            | Ca(ICC2/P1489777)SNP_25104 | 783  | G | T | 28  | 9  | --     | --  |
| CakTC38916 | Ca(ICC2/P1489777)SNP_25105 | 601  | A | T | 8   | 3  | --     | --  |
| CakTC26867 | Ca(ICC2/P1489777)SNP_25106 | 387  | T | C | 160 | 64 | --     | --  |
|            | Ca(ICC2/P1489777)SNP_25107 | 441  | T | A | 217 | 75 | --     | --  |
|            | Ca(ICC2/P1489777)SNP_25108 | 596  | A | T | 232 | 98 | --     | --  |
| CakTC43254 | Ca(ICC2/P1489777)SNP_25109 | 71   | T | A | 7   | 28 | Root   | --  |
|            | Ca(ICC2/P1489777)SNP_25110 | 556  | A | G | 3   | 11 | Root   | --  |
| CakTC37247 | Ca(ICC2/P1489777)SNP_25111 | 916  | A | G | 5   | 3  | --     | --  |
| CakTC37293 | Ca(ICC2/P1489777)SNP_25112 | 737  | C | G | 22  | 16 | --     | --  |
|            | Ca(ICC2/P1489777)SNP_25113 | 863  | A | G | 14  | 17 | --     | --  |
| CakTC24190 | Ca(ICC2/P1489777)SNP_25114 | 1011 | T | C | 30  | 4  | --     | --  |
| CakTC26603 | Ca(ICC2/P1489777)SNP_25115 | 165  | C | T | 15  | 9  | --     | --  |
|            | Ca(ICC2/P1489777)SNP_25116 | 843  | A | C | 24  | 4  | --     | --  |
| CakTC40776 | Ca(ICC2/P1489777)SNP_25117 | 714  | G | A | 13  | 3  | --     | VOZ |
|            | Ca(ICC2/P1489777)SNP_25118 | 756  | C | G | 13  | 4  | --     | VOZ |
| CakTC35416 | Ca(ICC2/P1489777)SNP_25119 | 670  | T | C | 3   | 14 | --     | --  |
|            | Ca(ICC2/P1489777)SNP_25120 | 779  | A | C | 13  | 12 | --     | --  |
|            | Ca(ICC2/P1489777)SNP_25121 | 1250 | T | G | 16  | 16 | --     | --  |
|            | Ca(ICC2/P1489777)SNP_25122 | 1351 | T | A | 11  | 15 | --     | --  |
|            | Ca(ICC2/P1489777)SNP_25123 | 1952 | T | A | 14  | 3  | --     | --  |
| CakTC35886 | Ca(ICC2/P1489777)SNP_25124 | 2441 | G | T | 5   | 3  | --     | --  |
|            | Ca(ICC2/P1489777)SNP_25125 | 2688 | A | T | 12  | 5  | --     | --  |
|            | Ca(ICC2/P1489777)SNP_25126 | 2756 | C | T | 7   | 4  | --     | --  |
|            | Ca(ICC2/P1489777)SNP_25127 | 2757 | G | A | 7   | 4  | --     | --  |
|            | Ca(ICC2/P1489777)SNP_25128 | 2787 | A | G | 8   | 4  | --     | --  |
| CakTC40508 | Ca(ICC2/P1489777)SNP_25129 | 173  | T | G | 9   | 5  | --     | --  |
|            | Ca(ICC2/P1489777)SNP_25130 | 224  | A | G | 9   | 4  | --     | --  |
|            | Ca(ICC2/P1489777)SNP_25131 | 343  | A | T | 6   | 8  | --     | --  |
|            | Ca(ICC2/P1489777)SNP_25132 | 357  | T | C | 8   | 8  | --     | --  |
|            | Ca(ICC2/P1489777)SNP_25133 | 542  | A | G | 6   | 13 | --     | --  |
|            | Ca(ICC2/P1489777)SNP_25134 | 602  | A | G | 7   | 13 | --     | --  |
| CakTC08676 | Ca(ICC2/P1489777)SNP_25135 | 4255 | G | A | 4   | 5  | --     | --  |
|            | Ca(ICC2/P1489777)SNP_25136 | 4538 | T | C | 5   | 3  | --     | --  |
| CakTC32412 | Ca(ICC2/P1489777)SNP_25137 | 92   | G | C | 5   | 5  | --     | --  |
|            | Ca(ICC2/P1489777)SNP_25138 | 150  | G | C | 3   | 5  | --     | --  |
| CakTC34915 | Ca(ICC2/P1489777)SNP_25139 | 344  | T | C | 19  | 13 | --     | --  |
|            | Ca(ICC2/P1489777)SNP_25140 | 758  | C | T | 34  | 29 | --     | --  |
|            | Ca(ICC2/P1489777)SNP_25141 | 973  | C | T | 26  | 28 | --     | --  |
|            | Ca(ICC2/P1489777)SNP_25142 | 997  | G | A | 27  | 27 | --     | --  |
|            | Ca(ICC2/P1489777)SNP_25143 | 1013 | G | A | 21  | 26 | --     | --  |
|            | Ca(ICC2/P1489777)SNP_25144 | 1153 | C | T | 20  | 18 | --     | --  |
|            | Ca(ICC2/P1489777)SNP_25145 | 1206 | G | A | 21  | 14 | --     | --  |
|            | Ca(ICC2/P1489777)SNP_25146 | 1263 | A | G | 18  | 12 | --     | --  |
|            | Ca(ICC2/P1489777)SNP_25147 | 1846 | G | T | 20  | 17 | --     | --  |
|            | Ca(ICC2/P1489777)SNP_25148 | 1961 | T | C | 20  | 18 | --     | --  |
|            | Ca(ICC2/P1489777)SNP_25149 | 2223 | A | G | 14  | 15 | --     | --  |
|            | Ca(ICC2/P1489777)SNP_25150 | 2754 | A | G | 10  | 5  | --     | --  |
|            | Ca(ICC2/P1489777)SNP_25151 | 2952 | T | C | 18  | 13 | --     | --  |
|            | Ca(ICC2/P1489777)SNP_25152 | 3113 | G | A | 18  | 3  | --     | --  |
|            | Ca(ICC2/P1489777)SNP_25153 | 3207 | T | C | 41  | 9  | --     | --  |
|            | Ca(ICC2/P1489777)SNP_25154 | 3428 | G | A | 34  | 11 | --     | --  |
| CakTC41719 | Ca(ICC2/P1489777)SNP_25155 | 202  | C | T | 13  | 14 | --     | --  |

|            |                            |      |   |   |    |    |        |      |
|------------|----------------------------|------|---|---|----|----|--------|------|
|            | Ca(ICC2/PI489777)SNP_25156 | 1508 | C | T | 20 | 7  | --     | --   |
|            | Ca(ICC2/PI489777)SNP_25157 | 1745 | C | A | 11 | 9  | --     | --   |
| CakTC29508 | Ca(ICC2/PI489777)SNP_25158 | 606  | G | A | 12 | 5  | --     | --   |
|            | Ca(ICC2/PI489777)SNP_25159 | 623  | A | G | 12 | 5  | --     | --   |
|            | Ca(ICC2/PI489777)SNP_25160 | 637  | A | G | 13 | 5  | --     | --   |
|            | Ca(ICC2/PI489777)SNP_25161 | 646  | G | T | 13 | 5  | --     | --   |
|            | Ca(ICC2/PI489777)SNP_25162 | 918  | G | C | 23 | 7  | --     | --   |
|            | Ca(ICC2/PI489777)SNP_25163 | 1458 | T | C | 9  | 3  | --     | --   |
| CakTC41686 | Ca(ICC2/PI489777)SNP_25164 | 145  | C | T | 3  | 3  | --     | --   |
| CakTC23031 | Ca(ICC2/PI489777)SNP_25165 | 116  | A | G | 19 | 6  | --     | --   |
|            | Ca(ICC2/PI489777)SNP_25166 | 171  | T | C | 20 | 7  | --     | --   |
|            | Ca(ICC2/PI489777)SNP_25167 | 223  | T | G | 18 | 7  | --     | --   |
|            | Ca(ICC2/PI489777)SNP_25168 | 306  | C | G | 23 | 7  | --     | --   |
| CakTC31751 | Ca(ICC2/PI489777)SNP_25169 | 871  | G | C | 6  | 6  | --     | --   |
|            | Ca(ICC2/PI489777)SNP_25170 | 1457 | C | T | 7  | 9  | --     | --   |
| CakTC08398 | Ca(ICC2/PI489777)SNP_25171 | 1908 | G | A | 4  | 8  | --     | --   |
| CakTC41222 | Ca(ICC2/PI489777)SNP_25172 | 228  | C | A | 6  | 5  | --     | --   |
| CakTC23901 | Ca(ICC2/PI489777)SNP_25173 | 797  | C | T | 8  | 3  | --     | --   |
|            | Ca(ICC2/PI489777)SNP_25174 | 842  | A | G | 6  | 3  | --     | --   |
| CakTC38559 | Ca(ICC2/PI489777)SNP_25175 | 621  | A | T | 22 | 13 | --     | --   |
|            | Ca(ICC2/PI489777)SNP_25176 | 704  | T | C | 27 | 15 | --     | --   |
|            | Ca(ICC2/PI489777)SNP_25177 | 738  | G | A | 26 | 16 | --     | --   |
|            | Ca(ICC2/PI489777)SNP_25178 | 881  | G | T | 18 | 9  | --     | --   |
| CakTC28204 | Ca(ICC2/PI489777)SNP_25179 | 1114 | A | G | 20 | 13 | --     | SNF2 |
|            | Ca(ICC2/PI489777)SNP_25180 | 1657 | A | G | 40 | 9  | --     | SNF2 |
| CakTC22031 | Ca(ICC2/PI489777)SNP_25181 | 1173 | C | T | 7  | 3  | --     | --   |
|            | Ca(ICC2/PI489777)SNP_25182 | 1669 | G | C | 10 | 5  | --     | --   |
|            | Ca(ICC2/PI489777)SNP_25183 | 1680 | C | T | 12 | 5  | --     | --   |
|            | Ca(ICC2/PI489777)SNP_25184 | 1692 | G | A | 10 | 5  | --     | --   |
|            | Ca(ICC2/PI489777)SNP_25185 | 1816 | A | G | 9  | 5  | --     | --   |
| CakTC39887 | Ca(ICC2/PI489777)SNP_25186 | 666  | G | A | 29 | 8  | --     | --   |
| CakTC32419 | Ca(ICC2/PI489777)SNP_25187 | 370  | C | T | 10 | 4  | --     | --   |
|            | Ca(ICC2/PI489777)SNP_25188 | 526  | A | G | 5  | 6  | --     | --   |
|            | Ca(ICC2/PI489777)SNP_25189 | 614  | T | C | 3  | 7  | --     | --   |
|            | Ca(ICC2/PI489777)SNP_25190 | 700  | T | C | 3  | 7  | --     | --   |
|            | Ca(ICC2/PI489777)SNP_25191 | 859  | C | A | 5  | 8  | --     | --   |
|            | Ca(ICC2/PI489777)SNP_25192 | 899  | G | A | 5  | 8  | --     | --   |
|            | Ca(ICC2/PI489777)SNP_25193 | 1003 | T | C | 3  | 5  | --     | --   |
|            | Ca(ICC2/PI489777)SNP_25194 | 1117 | A | T | 3  | 8  | --     | --   |
|            | Ca(ICC2/PI489777)SNP_25195 | 1169 | G | A | 3  | 8  | --     | --   |
|            | Ca(ICC2/PI489777)SNP_25196 | 1522 | C | T | 5  | 11 | --     | --   |
|            | Ca(ICC2/PI489777)SNP_25197 | 1762 | G | A | 4  | 13 | --     | --   |
| CakTC17513 | Ca(ICC2/PI489777)SNP_25198 | 1364 | C | T | 5  | 3  | --     | --   |
|            | Ca(ICC2/PI489777)SNP_25199 | 1462 | T | G | 3  | 3  | --     | --   |
| CakTC40011 | Ca(ICC2/PI489777)SNP_25200 | 362  | A | C | 5  | 4  | --     | --   |
|            | Ca(ICC2/PI489777)SNP_25201 | 419  | A | C | 3  | 4  | --     | --   |
| CakTC30799 | Ca(ICC2/PI489777)SNP_25202 | 1128 | G | C | 5  | 5  | --     | --   |
| CakTC40615 | Ca(ICC2/PI489777)SNP_25203 | 518  | C | A | 12 | 15 | --     | --   |
|            | Ca(ICC2/PI489777)SNP_25204 | 703  | A | G | 3  | 10 | --     | --   |
| CakTC30012 | Ca(ICC2/PI489777)SNP_25205 | 1273 | C | A | 25 | 18 | --     | --   |
|            | Ca(ICC2/PI489777)SNP_25206 | 1348 | A | G | 30 | 20 | --     | --   |
|            | Ca(ICC2/PI489777)SNP_25207 | 1355 | A | C | 26 | 20 | --     | --   |
| CakTC43000 | Ca(ICC2/PI489777)SNP_25208 | 390  | A | G | 16 | 7  | --     | --   |
|            | Ca(ICC2/PI489777)SNP_25209 | 546  | A | C | 27 | 14 | --     | --   |
| CakTC37415 | Ca(ICC2/PI489777)SNP_25210 | 925  | T | C | 12 | 5  | --     | --   |
| CakTC38875 | Ca(ICC2/PI489777)SNP_25211 | 589  | T | C | 12 | 17 | --     | --   |
|            | Ca(ICC2/PI489777)SNP_25212 | 1053 | T | A | 47 | 30 | --     | --   |
|            | Ca(ICC2/PI489777)SNP_25213 | 1134 | C | T | 30 | 25 | --     | --   |
|            | Ca(ICC2/PI489777)SNP_25214 | 1210 | C | G | 22 | 12 | --     | --   |
| CakTC43110 | Ca(ICC2/PI489777)SNP_25215 | 841  | C | T | 6  | 9  | --     | --   |
| CakTC40824 | Ca(ICC2/PI489777)SNP_25216 | 460  | T | C | 16 | 7  | --     | --   |
|            | Ca(ICC2/PI489777)SNP_25217 | 1446 | C | T | 9  | 6  | --     | --   |
|            | Ca(ICC2/PI489777)SNP_25218 | 1723 | T | A | 12 | 7  | --     | --   |
|            | Ca(ICC2/PI489777)SNP_25219 | 1744 | T | A | 9  | 6  | --     | --   |
|            | Ca(ICC2/PI489777)SNP_25220 | 1866 | C | T | 9  | 6  | --     | --   |
|            | Ca(ICC2/PI489777)SNP_25221 | 1940 | A | G | 8  | 5  | --     | --   |
|            | Ca(ICC2/PI489777)SNP_25222 | 1942 | G | T | 8  | 5  | --     | --   |
| CakTC23996 | Ca(ICC2/PI489777)SNP_25223 | 645  | A | G | 8  | 3  | Flower | bud  |
|            | Ca(ICC2/PI489777)SNP_25224 | 2195 | G | A | 16 | 4  | Flower | bud  |
| CakTC31014 | Ca(ICC2/PI489777)SNP_25225 | 1009 | A | G | 3  | 6  | --     | --   |
| CakTC30940 | Ca(ICC2/PI489777)SNP_25226 | 1351 | T | G | 8  | 4  | --     | --   |
|            | Ca(ICC2/PI489777)SNP_25227 | 1399 | C | A | 8  | 4  | --     | --   |
| CakTC36236 | Ca(ICC2/PI489777)SNP_25228 | 25   | T | C | 4  | 10 | --     | --   |
|            | Ca(ICC2/PI489777)SNP_25229 | 447  | T | A | 3  | 20 | --     | --   |

|            |                            |      |   |   |     |    |    |         |
|------------|----------------------------|------|---|---|-----|----|----|---------|
|            | Ca(ICC2/PI489777)SNP_25230 | 603  | C | T | 4   | 16 | -- | --      |
| CakTC42338 | Ca(ICC2/PI489777)SNP_25231 | 706  | C | T | 26  | 18 | -- | --      |
| CakTC11505 | Ca(ICC2/PI489777)SNP_25232 | 182  | A | T | 16  | 7  | -- | --      |
|            | Ca(ICC2/PI489777)SNP_25233 | 639  | A | G | 18  | 8  | -- | --      |
| CakTC39324 | Ca(ICC2/PI489777)SNP_25234 | 223  | A | G | 4   | 6  | -- | --      |
|            | Ca(ICC2/PI489777)SNP_25235 | 306  | G | A | 5   | 6  | -- | --      |
|            | Ca(ICC2/PI489777)SNP_25236 | 580  | A | G | 5   | 8  | -- | --      |
|            | Ca(ICC2/PI489777)SNP_25237 | 588  | G | A | 4   | 9  | -- | --      |
|            | Ca(ICC2/PI489777)SNP_25238 | 590  | G | A | 5   | 9  | -- | --      |
|            | Ca(ICC2/PI489777)SNP_25239 | 598  | C | A | 5   | 8  | -- | --      |
|            | Ca(ICC2/PI489777)SNP_25240 | 1284 | C | T | 6   | 3  | -- | --      |
| CakTC29881 | Ca(ICC2/PI489777)SNP_25241 | 1303 | A | C | 21  | 3  | -- | --      |
| CakTC09976 | Ca(ICC2/PI489777)SNP_25242 | 1376 | A | G | 8   | 3  | -- | --      |
| CakTC24096 | Ca(ICC2/PI489777)SNP_25243 | 1501 | G | C | 7   | 3  | -- | --      |
| CakTC23272 | Ca(ICC2/PI489777)SNP_25244 | 1532 | T | C | 4   | 3  | -- | --      |
| CakTC27485 | Ca(ICC2/PI489777)SNP_25245 | 335  | G | A | 3   | 5  | -- | --      |
|            | Ca(ICC2/PI489777)SNP_25246 | 2421 | A | T | 3   | 3  | -- | --      |
|            | Ca(ICC2/PI489777)SNP_25247 | 2777 | T | C | 8   | 3  | -- | --      |
|            | Ca(ICC2/PI489777)SNP_25248 | 2863 | T | C | 10  | 3  | -- | --      |
| CakTC06592 | Ca(ICC2/PI489777)SNP_25249 | 276  | A | C | 4   | 3  | -- | --      |
|            | Ca(ICC2/PI489777)SNP_25250 | 1012 | C | T | 7   | 5  | -- | --      |
| CakTC27844 | Ca(ICC2/PI489777)SNP_25251 | 678  | A | G | 8   | 7  | -- | --      |
|            | Ca(ICC2/PI489777)SNP_25252 | 899  | T | C | 16  | 7  | -- | --      |
|            | Ca(ICC2/PI489777)SNP_25253 | 1983 | C | T | 7   | 8  | -- | --      |
| CakTC30707 | Ca(ICC2/PI489777)SNP_25254 | 523  | C | T | 5   | 3  | -- | MYB     |
|            | Ca(ICC2/PI489777)SNP_25255 | 550  | C | T | 3   | 3  | -- | MYB     |
| CakTC36520 | Ca(ICC2/PI489777)SNP_25256 | 559  | C | T | 28  | 10 | -- | CPP     |
|            | Ca(ICC2/PI489777)SNP_25257 | 575  | C | T | 30  | 10 | -- | CPP     |
|            | Ca(ICC2/PI489777)SNP_25258 | 1972 | A | T | 15  | 10 | -- | CPP     |
|            | Ca(ICC2/PI489777)SNP_25259 | 1976 | G | T | 16  | 10 | -- | CPP     |
|            | Ca(ICC2/PI489777)SNP_25260 | 1988 | G | A | 16  | 9  | -- | CPP     |
|            | Ca(ICC2/PI489777)SNP_25261 | 2130 | A | G | 12  | 12 | -- | CPP     |
|            | Ca(ICC2/PI489777)SNP_25262 | 2197 | A | G | 9   | 9  | -- | CPP     |
|            | Ca(ICC2/PI489777)SNP_25263 | 2239 | G | C | 8   | 9  | -- | CPP     |
|            | Ca(ICC2/PI489777)SNP_25264 | 2552 | A | C | 14  | 10 | -- | CPP     |
|            | Ca(ICC2/PI489777)SNP_25265 | 2556 | G | C | 13  | 10 | -- | CPP     |
| CakTC33569 | Ca(ICC2/PI489777)SNP_25266 | 3254 | A | C | 9   | 9  | -- | --      |
| CakTC41683 | Ca(ICC2/PI489777)SNP_25267 | 373  | G | A | 26  | 28 | -- | --      |
|            | Ca(ICC2/PI489777)SNP_25268 | 493  | T | C | 23  | 13 | -- | --      |
|            | Ca(ICC2/PI489777)SNP_25269 | 509  | G | C | 22  | 17 | -- | --      |
|            | Ca(ICC2/PI489777)SNP_25270 | 546  | A | G | 18  | 13 | -- | --      |
| CakTC23864 | Ca(ICC2/PI489777)SNP_25271 | 340  | C | C | 13  | 6  | -- | AUX/IAA |
| CakTC40998 | Ca(ICC2/PI489777)SNP_25272 | 1348 | T | C | 7   | 8  | -- | --      |
|            | Ca(ICC2/PI489777)SNP_25273 | 1468 | G | C | 8   | 3  | -- | --      |
|            | Ca(ICC2/PI489777)SNP_25274 | 1471 | C | G | 7   | 3  | -- | --      |
|            | Ca(ICC2/PI489777)SNP_25275 | 1714 | A | T | 14  | 17 | -- | --      |
|            | Ca(ICC2/PI489777)SNP_25276 | 1779 | G | A | 7   | 16 | -- | --      |
|            | Ca(ICC2/PI489777)SNP_25277 | 1781 | C | T | 5   | 16 | -- | --      |
|            | Ca(ICC2/PI489777)SNP_25278 | 1827 | A | G | 6   | 16 | -- | --      |
|            | Ca(ICC2/PI489777)SNP_25279 | 1846 | A | G | 5   | 17 | -- | --      |
|            | Ca(ICC2/PI489777)SNP_25280 | 1855 | A | T | 5   | 17 | -- | --      |
| CakTC42079 | Ca(ICC2/PI489777)SNP_25281 | 352  | G | T | 44  | 37 | -- | --      |
| CakTC10458 | Ca(ICC2/PI489777)SNP_25282 | 240  | C | T | 5   | 3  | -- | --      |
|            | Ca(ICC2/PI489777)SNP_25283 | 650  | A | G | 4   | 3  | -- | --      |
| CakTC39240 | Ca(ICC2/PI489777)SNP_25284 | 424  | A | G | 28  | 11 | -- | --      |
|            | Ca(ICC2/PI489777)SNP_25285 | 535  | A | G | 13  | 10 | -- | --      |
|            | Ca(ICC2/PI489777)SNP_25286 | 1246 | T | G | 6   | 5  | -- | --      |
|            | Ca(ICC2/PI489777)SNP_25287 | 1347 | G | A | 4   | 3  | -- | --      |
| CakTC24809 | Ca(ICC2/PI489777)SNP_25288 | 108  | T | C | 31  | 9  | -- | --      |
| CakTC43007 | Ca(ICC2/PI489777)SNP_25289 | 136  | T | C | 3   | 8  | -- | --      |
|            | Ca(ICC2/PI489777)SNP_25290 | 357  | C | T | 58  | 70 | -- | --      |
|            | Ca(ICC2/PI489777)SNP_25291 | 572  | T | C | 76  | 96 | -- | --      |
|            | Ca(ICC2/PI489777)SNP_25292 | 897  | C | T | 128 | 63 | -- | --      |
|            | Ca(ICC2/PI489777)SNP_25293 | 1069 | C | T | 109 | 82 | -- | --      |
|            | Ca(ICC2/PI489777)SNP_25294 | 1444 | C | T | 72  | 49 | -- | --      |
| CakTC17523 | Ca(ICC2/PI489777)SNP_25295 | 240  | G | C | 19  | 3  | -- | --      |
|            | Ca(ICC2/PI489777)SNP_25296 | 252  | G | C | 18  | 3  | -- | --      |
|            | Ca(ICC2/PI489777)SNP_25297 | 261  | T | C | 21  | 3  | -- | --      |
| CakTC38969 | Ca(ICC2/PI489777)SNP_25298 | 435  | G | A | 11  | 5  | -- | --      |
|            | Ca(ICC2/PI489777)SNP_25299 | 471  | A | G | 9   | 5  | -- | --      |
|            | Ca(ICC2/PI489777)SNP_25300 | 482  | C | T | 8   | 6  | -- | --      |
|            | Ca(ICC2/PI489777)SNP_25301 | 1187 | T | G | 8   | 12 | -- | --      |
| CakTC33313 | Ca(ICC2/PI489777)SNP_25302 | 67   | A | T | 8   | 3  | -- | --      |
| CakTC25214 | Ca(ICC2/PI489777)SNP_25303 | 147  | G | A | 4   | 3  | -- | --      |

|            |                            |      |   |   |    |    |        |     |
|------------|----------------------------|------|---|---|----|----|--------|-----|
|            | Ca(ICC2/PI489777)SNP_25304 | 163  | C | G | 4  | 3  | --     | --  |
|            | Ca(ICC2/PI489777)SNP_25305 | 943  | A | G | 30 | 20 | --     | --  |
|            | Ca(ICC2/PI489777)SNP_25306 | 2434 | A | G | 32 | 5  | --     | --  |
|            | Ca(ICC2/PI489777)SNP_25307 | 3228 | A | G | 8  | 3  | --     | --  |
| CakTC43119 | Ca(ICC2/PI489777)SNP_25308 | 566  | G | A | 15 | 5  | --     | --  |
|            | Ca(ICC2/PI489777)SNP_25309 | 1031 | T | C | 12 | 7  | --     | --  |
|            | Ca(ICC2/PI489777)SNP_25310 | 1215 | G | A | 9  | 5  | --     | --  |
| CakTC42517 | Ca(ICC2/PI489777)SNP_25311 | 688  | G | A | 17 | 5  | --     | --  |
| CakTC26597 | Ca(ICC2/PI489777)SNP_25312 | 919  | T | C | 19 | 3  | --     | --  |
|            | Ca(ICC2/PI489777)SNP_25313 | 2057 | G | A | 8  | 3  | --     | --  |
|            | Ca(ICC2/PI489777)SNP_25314 | 2086 | C | A | 10 | 5  | --     | --  |
|            | Ca(ICC2/PI489777)SNP_25315 | 2350 | A | C | 4  | 3  | --     | --  |
| CakTC25947 | Ca(ICC2/PI489777)SNP_25316 | 431  | A | T | 31 | 20 | --     | --  |
|            | Ca(ICC2/PI489777)SNP_25317 | 785  | C | T | 10 | 3  | --     | --  |
| CakTC31497 | Ca(ICC2/PI489777)SNP_25318 | 330  | C | A | 32 | 20 | --     | MYB |
|            | Ca(ICC2/PI489777)SNP_25319 | 504  | C | T | 20 | 19 | --     | MYB |
|            | Ca(ICC2/PI489777)SNP_25320 | 510  | C | T | 19 | 18 | --     | MYB |
|            | Ca(ICC2/PI489777)SNP_25321 | 606  | T | C | 20 | 17 | --     | MYB |
| CakTC12490 | Ca(ICC2/PI489777)SNP_25322 | 1850 | A | C | 17 | 9  | --     | --  |
| CakTC08491 | Ca(ICC2/PI489777)SNP_25323 | 286  | T | A | 6  | 6  | --     | --  |
|            | Ca(ICC2/PI489777)SNP_25324 | 475  | T | C | 5  | 3  | --     | --  |
| CakTC30139 | Ca(ICC2/PI489777)SNP_25325 | 217  | A | G | 4  | 4  | --     | --  |
| CakTC25680 | Ca(ICC2/PI489777)SNP_25326 | 156  | A | G | 4  | 12 | --     | --  |
|            | Ca(ICC2/PI489777)SNP_25327 | 609  | C | T | 15 | 15 | --     | --  |
|            | Ca(ICC2/PI489777)SNP_25328 | 888  | C | T | 15 | 9  | --     | --  |
|            | Ca(ICC2/PI489777)SNP_25329 | 974  | T | G | 20 | 8  | --     | --  |
| CakTC10046 | Ca(ICC2/PI489777)SNP_25330 | 978  | G | A | 9  | 3  | --     | --  |
| CakTC34218 | Ca(ICC2/PI489777)SNP_25331 | 280  | A | C | 11 | 9  | --     | --  |
| CakTC39805 | Ca(ICC2/PI489777)SNP_25332 | 722  | T | C | 14 | 21 | --     | --  |
|            | Ca(ICC2/PI489777)SNP_25333 | 751  | G | A | 12 | 24 | --     | --  |
|            | Ca(ICC2/PI489777)SNP_25334 | 1057 | T | C | 12 | 23 | --     | --  |
|            | Ca(ICC2/PI489777)SNP_25335 | 1311 | T | C | 5  | 8  | --     | --  |
| CakTC42347 | Ca(ICC2/PI489777)SNP_25336 | 105  | C | A | 4  | 3  | --     | --  |
|            | Ca(ICC2/PI489777)SNP_25337 | 1257 | A | G | 20 | 8  | --     | --  |
|            | Ca(ICC2/PI489777)SNP_25338 | 1334 | C | T | 20 | 9  | --     | --  |
|            | Ca(ICC2/PI489777)SNP_25339 | 1912 | A | T | 7  | 4  | --     | --  |
| CakTC36142 | Ca(ICC2/PI489777)SNP_25340 | 2543 | T | C | 5  | 4  | --     | --  |
| CakTC26943 | Ca(ICC2/PI489777)SNP_25341 | 246  | G | A | 52 | 29 | --     | --  |
| CakTC37333 | Ca(ICC2/PI489777)SNP_25342 | 61   | C | T | 7  | 3  | --     | --  |
|            | Ca(ICC2/PI489777)SNP_25343 | 73   | C | G | 13 | 7  | --     | --  |
| CakTC41003 | Ca(ICC2/PI489777)SNP_25344 | 480  | A | C | 3  | 3  | --     | --  |
| CakTC11421 | Ca(ICC2/PI489777)SNP_25345 | 122  | A | T | 34 | 17 | --     | --  |
|            | Ca(ICC2/PI489777)SNP_25346 | 1068 | A | G | 4  | 5  | --     | --  |
| CakTC33255 | Ca(ICC2/PI489777)SNP_25347 | 191  | T | C | 3  | 7  | --     | --  |
|            | Ca(ICC2/PI489777)SNP_25348 | 545  | G | A | 10 | 7  | --     | --  |
|            | Ca(ICC2/PI489777)SNP_25349 | 563  | G | A | 12 | 7  | --     | --  |
|            | Ca(ICC2/PI489777)SNP_25350 | 977  | C | T | 6  | 8  | --     | --  |
|            | Ca(ICC2/PI489777)SNP_25351 | 1515 | G | A | 7  | 7  | --     | --  |
|            | Ca(ICC2/PI489777)SNP_25352 | 1885 | C | T | 15 | 5  | --     | --  |
| CakTC41155 | Ca(ICC2/PI489777)SNP_25353 | 48   | A | C | 5  | 9  | --     | --  |
|            | Ca(ICC2/PI489777)SNP_25354 | 195  | C | T | 8  | 11 | --     | --  |
|            | Ca(ICC2/PI489777)SNP_25355 | 745  | A | G | 6  | 7  | --     | --  |
|            | Ca(ICC2/PI489777)SNP_25356 | 1234 | A | G | 14 | 12 | --     | --  |
|            | Ca(ICC2/PI489777)SNP_25357 | 1984 | G | A | 7  | 17 | --     | --  |
|            | Ca(ICC2/PI489777)SNP_25358 | 2192 | T | C | 10 | 15 | --     | --  |
|            | Ca(ICC2/PI489777)SNP_25359 | 2309 | G | A | 8  | 11 | --     | --  |
|            | Ca(ICC2/PI489777)SNP_25360 | 2398 | A | T | 7  | 6  | --     | --  |
| CakTC27327 | Ca(ICC2/PI489777)SNP_25361 | 1428 | T | C | 5  | 3  | Flower | bud |
| CakTC30203 | Ca(ICC2/PI489777)SNP_25362 | 116  | A | G | 3  | 3  | --     | --  |
|            | Ca(ICC2/PI489777)SNP_25363 | 510  | T | C | 13 | 4  | --     | --  |
|            | Ca(ICC2/PI489777)SNP_25364 | 678  | A | G | 5  | 3  | --     | --  |
|            | Ca(ICC2/PI489777)SNP_25365 | 785  | T | C | 5  | 3  | --     | --  |
|            | Ca(ICC2/PI489777)SNP_25366 | 1098 | T | G | 6  | 5  | --     | --  |
|            | Ca(ICC2/PI489777)SNP_25367 | 1212 | C | T | 8  | 9  | --     | --  |
|            | Ca(ICC2/PI489777)SNP_25368 | 1424 | T | G | 4  | 6  | --     | --  |
| CakTC32532 | Ca(ICC2/PI489777)SNP_25369 | 250  | T | G | 15 | 13 | --     | --  |
|            | Ca(ICC2/PI489777)SNP_25370 | 2056 | C | A | 19 | 16 | --     | --  |
| CakTC37237 | Ca(ICC2/PI489777)SNP_25371 | 390  | G | A | 11 | 9  | --     | --  |
|            | Ca(ICC2/PI489777)SNP_25372 | 913  | G | C | 4  | 5  | --     | --  |
| CakTC23780 | Ca(ICC2/PI489777)SNP_25373 | 268  | A | C | 10 | 4  | --     | --  |
| CakTC24905 | Ca(ICC2/PI489777)SNP_25374 | 479  | C | T | 14 | 7  | --     | --  |
|            | Ca(ICC2/PI489777)SNP_25375 | 1485 | A | G | 15 | 5  | --     | --  |
|            | Ca(ICC2/PI489777)SNP_25376 | 1545 | C | T | 9  | 4  | --     | --  |
|            | Ca(ICC2/PI489777)SNP_25377 | 2014 | C | T | 18 | 9  | --     | --  |

|            |                             |      |   |   |    |    |    |     |
|------------|-----------------------------|------|---|---|----|----|----|-----|
| CakTC25105 | Ca(ICCV2/PI489777)SNP_25378 | 103  | C | T | 6  | 5  | -- | TPR |
|            | Ca(ICCV2/PI489777)SNP_25379 | 757  | G | T | 6  | 12 | -- | TPR |
| CakTC11511 | Ca(ICCV2/PI489777)SNP_25380 | 244  | T | G | 76 | 22 | -- | --  |
| CakTC38622 | Ca(ICCV2/PI489777)SNP_25381 | 623  | T | A | 7  | 5  | -- | --  |
|            | Ca(ICCV2/PI489777)SNP_25382 | 640  | C | T | 7  | 5  | -- | --  |
| CakTC36566 | Ca(ICCV2/PI489777)SNP_25383 | 203  | A | G | 10 | 10 | -- | --  |
|            | Ca(ICCV2/PI489777)SNP_25384 | 963  | A | G | 8  | 4  | -- | --  |
|            | Ca(ICCV2/PI489777)SNP_25385 | 966  | T | C | 8  | 5  | -- | --  |
|            | Ca(ICCV2/PI489777)SNP_25386 | 1102 | C | A | 10 | 5  | -- | --  |
|            | Ca(ICCV2/PI489777)SNP_25387 | 1548 | T | C | 12 | 5  | -- | --  |
|            | Ca(ICCV2/PI489777)SNP_25388 | 1905 | T | G | 8  | 5  | -- | --  |
|            | Ca(ICCV2/PI489777)SNP_25389 | 2256 | C | G | 7  | 4  | -- | --  |
| CakTC37950 | Ca(ICCV2/PI489777)SNP_25390 | 115  | G | A | 5  | 4  | -- | --  |
|            | Ca(ICCV2/PI489777)SNP_25391 | 275  | C | G | 16 | 16 | -- | --  |
|            | Ca(ICCV2/PI489777)SNP_25392 | 350  | A | C | 22 | 16 | -- | --  |
|            | Ca(ICCV2/PI489777)SNP_25393 | 359  | C | G | 23 | 18 | -- | --  |
|            | Ca(ICCV2/PI489777)SNP_25394 | 629  | G | C | 40 | 17 | -- | --  |
|            | Ca(ICCV2/PI489777)SNP_25395 | 743  | A | G | 62 | 20 | -- | --  |
|            | Ca(ICCV2/PI489777)SNP_25396 | 791  | C | T | 62 | 19 | -- | --  |
| CakTC40794 | Ca(ICCV2/PI489777)SNP_25397 | 173  | C | T | 3  | 12 | -- | --  |
|            | Ca(ICCV2/PI489777)SNP_25398 | 182  | G | A | 5  | 13 | -- | --  |
|            | Ca(ICCV2/PI489777)SNP_25399 | 385  | C | G | 5  | 18 | -- | --  |
|            | Ca(ICCV2/PI489777)SNP_25400 | 494  | T | C | 6  | 21 | -- | --  |
| CakTC36038 | Ca(ICCV2/PI489777)SNP_25401 | 1056 | G | A | 26 | 7  | -- | --  |
|            | Ca(ICCV2/PI489777)SNP_25402 | 2427 | T | G | 20 | 5  | -- | --  |
|            | Ca(ICCV2/PI489777)SNP_25403 | 2433 | T | C | 20 | 6  | -- | --  |
|            | Ca(ICCV2/PI489777)SNP_25404 | 2816 | C | T | 15 | 6  | -- | --  |
| CakTC38238 | Ca(ICCV2/PI489777)SNP_25405 | 348  | A | T | 27 | 8  | -- | --  |
| CakTC42177 | Ca(ICCV2/PI489777)SNP_25406 | 1369 | C | T | 38 | 3  | -- | --  |
| CakTC36120 | Ca(ICCV2/PI489777)SNP_25407 | 639  | T | C | 11 | 5  | -- | --  |
|            | Ca(ICCV2/PI489777)SNP_25408 | 746  | T | A | 14 | 4  | -- | --  |
|            | Ca(ICCV2/PI489777)SNP_25409 | 1496 | C | T | 13 | 4  | -- | --  |
|            | Ca(ICCV2/PI489777)SNP_25410 | 1679 | T | A | 5  | 6  | -- | --  |
|            | Ca(ICCV2/PI489777)SNP_25411 | 2410 | G | A | 4  | 4  | -- | --  |
| CakTC02595 | Ca(ICCV2/PI489777)SNP_25412 | 560  | A | G | 11 | 4  | -- | --  |
|            | Ca(ICCV2/PI489777)SNP_25413 | 752  | C | T | 8  | 4  | -- | --  |
|            | Ca(ICCV2/PI489777)SNP_25414 | 827  | A | T | 8  | 3  | -- | --  |
|            | Ca(ICCV2/PI489777)SNP_25415 | 893  | A | G | 10 | 4  | -- | --  |
|            | Ca(ICCV2/PI489777)SNP_25416 | 941  | T | C | 8  | 4  | -- | --  |
|            | Ca(ICCV2/PI489777)SNP_25417 | 1757 | A | G | 5  | 6  | -- | --  |
|            | Ca(ICCV2/PI489777)SNP_25418 | 1940 | C | T | 4  | 3  | -- | --  |
| CakTC29192 | Ca(ICCV2/PI489777)SNP_25419 | 688  | T | C | 21 | 27 | -- | --  |
|            | Ca(ICCV2/PI489777)SNP_25420 | 1161 | C | T | 7  | 5  | -- | --  |
| CakTC33180 | Ca(ICCV2/PI489777)SNP_25421 | 463  | C | A | 16 | 8  | -- | --  |
| CakTC22483 | Ca(ICCV2/PI489777)SNP_25422 | 346  | A | G | 7  | 3  | -- | --  |
|            | Ca(ICCV2/PI489777)SNP_25423 | 371  | G | A | 6  | 3  | -- | --  |
| CakTC24595 | Ca(ICCV2/PI489777)SNP_25424 | 470  | C | T | 11 | 7  | -- | --  |
| CakTC36220 | Ca(ICCV2/PI489777)SNP_25425 | 353  | A | G | 13 | 3  | -- | --  |
|            | Ca(ICCV2/PI489777)SNP_25426 | 360  | T | C | 9  | 3  | -- | --  |
|            | Ca(ICCV2/PI489777)SNP_25427 | 365  | T | C | 7  | 4  | -- | --  |
|            | Ca(ICCV2/PI489777)SNP_25428 | 860  | T | C | 15 | 6  | -- | --  |
|            | Ca(ICCV2/PI489777)SNP_25429 | 896  | G | A | 17 | 5  | -- | --  |
|            | Ca(ICCV2/PI489777)SNP_25430 | 941  | C | T | 22 | 5  | -- | --  |
|            | Ca(ICCV2/PI489777)SNP_25431 | 1217 | G | A | 21 | 4  | -- | --  |
|            | Ca(ICCV2/PI489777)SNP_25432 | 1220 | T | C | 21 | 4  | -- | --  |
|            | Ca(ICCV2/PI489777)SNP_25433 | 1352 | C | T | 15 | 7  | -- | --  |
|            | Ca(ICCV2/PI489777)SNP_25434 | 1431 | A | G | 10 | 6  | -- | --  |
|            | Ca(ICCV2/PI489777)SNP_25435 | 1437 | G | C | 10 | 6  | -- | --  |
|            | Ca(ICCV2/PI489777)SNP_25436 | 1820 | A | G | 16 | 4  | -- | --  |
|            | Ca(ICCV2/PI489777)SNP_25437 | 1930 | T | C | 19 | 4  | -- | --  |
|            | Ca(ICCV2/PI489777)SNP_25438 | 2092 | A | C | 23 | 5  | -- | --  |
|            | Ca(ICCV2/PI489777)SNP_25439 | 2174 | C | G | 20 | 5  | -- | --  |
|            | Ca(ICCV2/PI489777)SNP_25440 | 2433 | C | T | 14 | 3  | -- | --  |
|            | Ca(ICCV2/PI489777)SNP_25441 | 2606 | G | A | 12 | 7  | -- | --  |
|            | Ca(ICCV2/PI489777)SNP_25442 | 2685 | A | G | 8  | 8  | -- | --  |
|            | Ca(ICCV2/PI489777)SNP_25443 | 2830 | G | A | 9  | 6  | -- | --  |
|            | Ca(ICCV2/PI489777)SNP_25444 | 2843 | A | G | 12 | 6  | -- | --  |
| CakTC26175 | Ca(ICCV2/PI489777)SNP_25445 | 188  | A | G | 9  | 16 | -- | --  |
|            | Ca(ICCV2/PI489777)SNP_25446 | 734  | A | G | 6  | 3  | -- | --  |
| CakTC33187 | Ca(ICCV2/PI489777)SNP_25447 | 471  | A | T | 18 | 13 | -- | --  |
|            | Ca(ICCV2/PI489777)SNP_25448 | 1357 | A | G | 15 | 31 | -- | --  |
|            | Ca(ICCV2/PI489777)SNP_25449 | 1428 | T | G | 17 | 28 | -- | --  |
|            | Ca(ICCV2/PI489777)SNP_25450 | 1665 | T | A | 18 | 19 | -- | --  |
|            | Ca(ICCV2/PI489777)SNP_25451 | 1929 | A | G | 11 | 9  | -- | --  |



|            |                            |      |   |   |    |    |        |      |
|------------|----------------------------|------|---|---|----|----|--------|------|
|            | Ca(ICC2/PI489777)SNP_25452 | 1941 | C | T | 12 | 11 | --     | --   |
|            | Ca(ICC2/PI489777)SNP_25453 | 2098 | G | A | 5  | 7  | --     | --   |
| CakTC38271 | Ca(ICC2/PI489777)SNP_25454 | 495  | C | G | 6  | 6  | --     | --   |
|            | Ca(ICC2/PI489777)SNP_25455 | 626  | C | T | 6  | 11 | --     | --   |
|            | Ca(ICC2/PI489777)SNP_25456 | 733  | G | A | 7  | 8  | --     | --   |
|            | Ca(ICC2/PI489777)SNP_25457 | 833  | A | G | 5  | 9  | --     | --   |
|            | Ca(ICC2/PI489777)SNP_25458 | 855  | T | C | 5  | 9  | --     | --   |
|            | Ca(ICC2/PI489777)SNP_25459 | 929  | T | G | 4  | 7  | --     | --   |
| CakTC33160 | Ca(ICC2/PI489777)SNP_25460 | 51   | A | G | 33 | 18 | --     | --   |
|            | Ca(ICC2/PI489777)SNP_25461 | 536  | C | A | 3  | 9  | --     | --   |
| CakTC02827 | Ca(ICC2/PI489777)SNP_25462 | 1127 | A | G | 6  | 4  | --     | --   |
| CakTC29368 | Ca(ICC2/PI489777)SNP_25463 | 154  | T | C | 24 | 16 | --     | --   |
|            | Ca(ICC2/PI489777)SNP_25464 | 249  | C | G | 29 | 17 | --     | --   |
|            | Ca(ICC2/PI489777)SNP_25465 | 264  | C | T | 28 | 18 | --     | --   |
| CakTC28018 | Ca(ICC2/PI489777)SNP_25466 | 1035 | G | A | 22 | 10 | --     | GNAT |
| CakTC37831 | Ca(ICC2/PI489777)SNP_25467 | 203  | G | T | 4  | 5  | --     | --   |
|            | Ca(ICC2/PI489777)SNP_25468 | 405  | C | G | 9  | 5  | --     | --   |
|            | Ca(ICC2/PI489777)SNP_25469 | 429  | G | T | 9  | 4  | --     | --   |
|            | Ca(ICC2/PI489777)SNP_25470 | 449  | C | T | 9  | 7  | --     | --   |
|            | Ca(ICC2/PI489777)SNP_25471 | 617  | T | C | 17 | 3  | --     | --   |
|            | Ca(ICC2/PI489777)SNP_25472 | 744  | T | A | 17 | 4  | --     | --   |
| CakTC40915 | Ca(ICC2/PI489777)SNP_25473 | 1503 | A | C | 45 | 18 | --     | --   |
| CakTC36386 | Ca(ICC2/PI489777)SNP_25474 | 642  | A | G | 3  | 3  | --     | --   |
| CakTC08616 | Ca(ICC2/PI489777)SNP_25475 | 829  | A | G | 5  | 5  | --     | --   |
| CakTC32375 | Ca(ICC2/PI489777)SNP_25476 | 1265 | A | C | 12 | 10 | --     | --   |
| CakTC25026 | Ca(ICC2/PI489777)SNP_25477 | 1854 | C | A | 18 | 9  | --     | --   |
|            | Ca(ICC2/PI489777)SNP_25478 | 2298 | T | C | 4  | 3  | --     | --   |
| CakTC30532 | Ca(ICC2/PI489777)SNP_25479 | 912  | T | C | 16 | 5  | --     | SNF2 |
|            | Ca(ICC2/PI489777)SNP_25480 | 1821 | G | A | 9  | 9  | --     | SNF2 |
|            | Ca(ICC2/PI489777)SNP_25481 | 2232 | C | G | 11 | 6  | --     | SNF2 |
|            | Ca(ICC2/PI489777)SNP_25482 | 2249 | G | A | 11 | 7  | --     | SNF2 |
| CakTC24688 | Ca(ICC2/PI489777)SNP_25483 | 1997 | C | T | 15 | 10 | --     | --   |
|            | Ca(ICC2/PI489777)SNP_25484 | 2181 | G | C | 24 | 22 | --     | --   |
|            | Ca(ICC2/PI489777)SNP_25485 | 2388 | C | T | 22 | 18 | --     | --   |
|            | Ca(ICC2/PI489777)SNP_25486 | 2559 | A | G | 23 | 21 | --     | --   |
|            | Ca(ICC2/PI489777)SNP_25487 | 2655 | A | T | 17 | 13 | --     | --   |
|            | Ca(ICC2/PI489777)SNP_25488 | 2761 | C | T | 15 | 7  | --     | --   |
|            | Ca(ICC2/PI489777)SNP_25489 | 3384 | G | A | 13 | 20 | --     | --   |
|            | Ca(ICC2/PI489777)SNP_25490 | 3953 | T | A | 6  | 3  | --     | --   |
| CakTC31356 | Ca(ICC2/PI489777)SNP_25491 | 1244 | T | G | 11 | 4  | Flower | bud  |
|            | Ca(ICC2/PI489777)SNP_25492 | 1490 | T | C | 17 | 12 | Flower | bud  |
|            | Ca(ICC2/PI489777)SNP_25493 | 2366 | T | C | 14 | 5  | Flower | bud  |
| CakTC08536 | Ca(ICC2/PI489777)SNP_25494 | 222  | T | C | 8  | 4  | Root   | --   |
|            | Ca(ICC2/PI489777)SNP_25495 | 362  | A | G | 9  | 4  | Root   | --   |
| CakTC35370 | Ca(ICC2/PI489777)SNP_25496 | 87   | C | A | 10 | 3  | --     | --   |
|            | Ca(ICC2/PI489777)SNP_25497 | 89   | T | C | 10 | 3  | --     | --   |
|            | Ca(ICC2/PI489777)SNP_25498 | 106  | G | A | 11 | 4  | --     | --   |
|            | Ca(ICC2/PI489777)SNP_25499 | 235  | G | A | 12 | 5  | --     | --   |
|            | Ca(ICC2/PI489777)SNP_25500 | 1490 | A | C | 5  | 4  | --     | --   |
|            | Ca(ICC2/PI489777)SNP_25501 | 1884 | C | T | 10 | 13 | --     | --   |
|            | Ca(ICC2/PI489777)SNP_25502 | 2042 | G | A | 19 | 17 | --     | --   |
|            | Ca(ICC2/PI489777)SNP_25503 | 2127 | T | C | 22 | 20 | --     | --   |
|            | Ca(ICC2/PI489777)SNP_25504 | 2814 | A | T | 6  | 11 | --     | --   |
| CakTC33905 | Ca(ICC2/PI489777)SNP_25505 | 109  | G | A | 4  | 4  | --     | --   |
|            | Ca(ICC2/PI489777)SNP_25506 | 237  | A | G | 4  | 8  | --     | --   |
| CakTC37883 | Ca(ICC2/PI489777)SNP_25507 | 245  | A | C | 6  | 4  | --     | --   |
| CakTC38822 | Ca(ICC2/PI489777)SNP_25508 | 661  | T | C | 3  | 7  | --     | --   |
|            | Ca(ICC2/PI489777)SNP_25509 | 781  | C | T | 3  | 7  | --     | --   |
|            | Ca(ICC2/PI489777)SNP_25510 | 811  | T | C | 3  | 7  | --     | --   |
| CakTC27192 | Ca(ICC2/PI489777)SNP_25511 | 1305 | G | A | 6  | 9  | --     | --   |
|            | Ca(ICC2/PI489777)SNP_25512 | 1389 | G | A | 8  | 13 | --     | --   |
|            | Ca(ICC2/PI489777)SNP_25513 | 1485 | G | T | 9  | 6  | --     | --   |
|            | Ca(ICC2/PI489777)SNP_25514 | 1559 | T | C | 9  | 6  | --     | --   |
|            | Ca(ICC2/PI489777)SNP_25515 | 1652 | G | C | 7  | 4  | --     | --   |
|            | Ca(ICC2/PI489777)SNP_25516 | 1817 | C | A | 4  | 3  | --     | --   |
|            | Ca(ICC2/PI489777)SNP_25517 | 1842 | G | A | 4  | 3  | --     | --   |
| CakTC38432 | Ca(ICC2/PI489777)SNP_25518 | 688  | G | T | 11 | 8  | --     | GNAT |
| CakTC41434 | Ca(ICC2/PI489777)SNP_25519 | 222  | G | A | 19 | 7  | --     | --   |
|            | Ca(ICC2/PI489777)SNP_25520 | 918  | G | A | 34 | 9  | --     | --   |
|            | Ca(ICC2/PI489777)SNP_25521 | 1338 | G | A | 24 | 9  | --     | --   |
|            | Ca(ICC2/PI489777)SNP_25522 | 1401 | A | G | 24 | 9  | --     | --   |
|            | Ca(ICC2/PI489777)SNP_25523 | 1407 | G | C | 24 | 9  | --     | --   |
|            | Ca(ICC2/PI489777)SNP_25524 | 2253 | T | G | 25 | 6  | --     | --   |
|            | Ca(ICC2/PI489777)SNP_25525 | 2379 | A | C | 16 | 3  | --     | --   |

|            |                             |      |   |   |    |    |           |      |
|------------|-----------------------------|------|---|---|----|----|-----------|------|
| CakTC11319 | Ca(ICCV2/PI489777)SNP_25526 | 676  | G | A | 20 | 4  | --        | --   |
|            | Ca(ICCV2/PI489777)SNP_25527 | 1009 | G | A | 28 | 6  | --        | --   |
| CakTC25211 | Ca(ICCV2/PI489777)SNP_25528 | 19   | T | A | 8  | 4  | --        | --   |
|            | Ca(ICCV2/PI489777)SNP_25529 | 44   | T | C | 12 | 5  | --        | --   |
|            | Ca(ICCV2/PI489777)SNP_25530 | 45   | C | T | 12 | 5  | --        | --   |
|            | Ca(ICCV2/PI489777)SNP_25531 | 687  | T | C | 5  | 5  | --        | --   |
|            | Ca(ICCV2/PI489777)SNP_25532 | 696  | C | T | 5  | 5  | --        | --   |
|            | Ca(ICCV2/PI489777)SNP_25533 | 849  | G | A | 7  | 4  | --        | --   |
| CakTC41242 | Ca(ICCV2/PI489777)SNP_25534 | 230  | A | G | 52 | 40 | --        | --   |
| CakTC40172 | Ca(ICCV2/PI489777)SNP_25535 | 23   | A | G | 4  | 3  | --        | MYB  |
|            | Ca(ICCV2/PI489777)SNP_25536 | 869  | A | G | 15 | 8  | --        | MYB  |
| CakTC29871 | Ca(ICCV2/PI489777)SNP_25537 | 734  | G | T | 21 | 21 | --        | --   |
|            | Ca(ICCV2/PI489777)SNP_25538 | 757  | G | A | 20 | 25 | --        | --   |
|            | Ca(ICCV2/PI489777)SNP_25539 | 1470 | A | G | 11 | 8  | --        | --   |
|            | Ca(ICCV2/PI489777)SNP_25540 | 1689 | G | A | 4  | 9  | --        | --   |
| CakTC41941 | Ca(ICCV2/PI489777)SNP_25541 | 269  | G | A | 21 | 6  | --        | --   |
|            | Ca(ICCV2/PI489777)SNP_25542 | 490  | T | C | 54 | 23 | --        | --   |
|            | Ca(ICCV2/PI489777)SNP_25543 | 1022 | A | G | 13 | 8  | --        | --   |
| CakTC41960 | Ca(ICCV2/PI489777)SNP_25544 | 118  | C | G | 15 | 11 | --        | --   |
|            | Ca(ICCV2/PI489777)SNP_25545 | 844  | G | A | 34 | 10 | --        | --   |
|            | Ca(ICCV2/PI489777)SNP_25546 | 904  | C | G | 16 | 4  | --        | --   |
|            | Ca(ICCV2/PI489777)SNP_25547 | 946  | C | T | 13 | 3  | --        | --   |
| CakTC42832 | Ca(ICCV2/PI489777)SNP_25548 | 235  | T | C | 24 | 6  | --        | --   |
|            | Ca(ICCV2/PI489777)SNP_25549 | 309  | A | G | 25 | 6  | --        | --   |
|            | Ca(ICCV2/PI489777)SNP_25550 | 421  | A | T | 16 | 3  | --        | --   |
|            | Ca(ICCV2/PI489777)SNP_25551 | 699  | A | G | 10 | 5  | --        | --   |
|            | Ca(ICCV2/PI489777)SNP_25552 | 844  | A | G | 21 | 7  | --        | --   |
|            | Ca(ICCV2/PI489777)SNP_25553 | 904  | A | G | 20 | 10 | --        | --   |
|            | Ca(ICCV2/PI489777)SNP_25554 | 954  | G | A | 22 | 8  | --        | --   |
|            | Ca(ICCV2/PI489777)SNP_25555 | 985  | C | T | 21 | 4  | --        | --   |
|            | Ca(ICCV2/PI489777)SNP_25556 | 1033 | T | C | 29 | 8  | --        | --   |
|            | Ca(ICCV2/PI489777)SNP_25557 | 1306 | C | T | 46 | 14 | --        | --   |
| CakTC24321 | Ca(ICCV2/PI489777)SNP_25558 | 1148 | T | G | 37 | 47 | --        | --   |
|            | Ca(ICCV2/PI489777)SNP_25559 | 1415 | G | A | 32 | 33 | --        | --   |
|            | Ca(ICCV2/PI489777)SNP_25560 | 1961 | A | G | 7  | 19 | --        | --   |
| CakTC42501 | Ca(ICCV2/PI489777)SNP_25561 | 418  | A | G | 6  | 9  | --        | --   |
| CakTC32410 | Ca(ICCV2/PI489777)SNP_25562 | 168  | C | T | 3  | 3  | --        | --   |
|            | Ca(ICCV2/PI489777)SNP_25563 | 392  | C | T | 3  | 3  | --        | --   |
|            | Ca(ICCV2/PI489777)SNP_25564 | 563  | A | G | 3  | 5  | --        | --   |
|            | Ca(ICCV2/PI489777)SNP_25565 | 629  | G | C | 4  | 5  | --        | --   |
|            | Ca(ICCV2/PI489777)SNP_25566 | 1685 | A | G | 5  | 5  | --        | --   |
|            | Ca(ICCV2/PI489777)SNP_25567 | 1767 | G | T | 10 | 7  | --        | --   |
| CakTC39882 | Ca(ICCV2/PI489777)SNP_25568 | 480  | C | T | 11 | 6  | Young_pod | --   |
|            | Ca(ICCV2/PI489777)SNP_25569 | 1346 | A | G | 12 | 5  | Young_pod | --   |
| CakTC37123 | Ca(ICCV2/PI489777)SNP_25570 | 398  | C | G | 3  | 12 | --        | --   |
|            | Ca(ICCV2/PI489777)SNP_25571 | 1052 | C | G | 8  | 12 | --        | --   |
|            | Ca(ICCV2/PI489777)SNP_25572 | 1383 | G | A | 14 | 13 | --        | --   |
| CakTC38154 | Ca(ICCV2/PI489777)SNP_25573 | 548  | C | T | 12 | 11 | --        | MADS |
|            | Ca(ICCV2/PI489777)SNP_25574 | 641  | T | C | 16 | 13 | --        | MADS |
|            | Ca(ICCV2/PI489777)SNP_25575 | 998  | C | T | 4  | 4  | --        | MADS |
| CakTC26143 | Ca(ICCV2/PI489777)SNP_25576 | 2645 | A | G | 33 | 6  | --        | --   |
|            | Ca(ICCV2/PI489777)SNP_25577 | 3072 | C | T | 39 | 14 | --        | --   |
| CakTC38140 | Ca(ICCV2/PI489777)SNP_25578 | 930  | G | A | 7  | 5  | --        | --   |
| CakTC31667 | Ca(ICCV2/PI489777)SNP_25579 | 413  | C | T | 7  | 12 | --        | --   |
| CakTC42194 | Ca(ICCV2/PI489777)SNP_25580 | 256  | G | T | 21 | 7  | --        | --   |
|            | Ca(ICCV2/PI489777)SNP_25581 | 698  | C | T | 12 | 15 | --        | --   |
|            | Ca(ICCV2/PI489777)SNP_25582 | 710  | A | G | 10 | 15 | --        | --   |
|            | Ca(ICCV2/PI489777)SNP_25583 | 755  | T | G | 8  | 15 | --        | --   |
|            | Ca(ICCV2/PI489777)SNP_25584 | 894  | G | T | 5  | 15 | --        | --   |
| CakTC20162 | Ca(ICCV2/PI489777)SNP_25585 | 372  | A | C | 14 | 11 | --        | --   |
| CakTC25251 | Ca(ICCV2/PI489777)SNP_25586 | 1154 | G | A | 6  | 3  | --        | --   |
| CakTC39480 | Ca(ICCV2/PI489777)SNP_25587 | 253  | C | A | 12 | 3  | --        | --   |
|            | Ca(ICCV2/PI489777)SNP_25588 | 297  | C | T | 13 | 3  | --        | --   |
|            | Ca(ICCV2/PI489777)SNP_25589 | 392  | A | G | 9  | 6  | --        | --   |
|            | Ca(ICCV2/PI489777)SNP_25590 | 1247 | A | G | 16 | 7  | --        | --   |
|            | Ca(ICCV2/PI489777)SNP_25591 | 1248 | T | A | 16 | 7  | --        | --   |
| CakTC26908 | Ca(ICCV2/PI489777)SNP_25592 | 268  | C | T | 5  | 3  | --        | --   |
|            | Ca(ICCV2/PI489777)SNP_25593 | 858  | T | C | 8  | 3  | --        | --   |
| CakTC29405 | Ca(ICCV2/PI489777)SNP_25594 | 68   | C | G | 6  | 5  | --        | --   |
|            | Ca(ICCV2/PI489777)SNP_25595 | 78   | T | G | 6  | 5  | --        | --   |
|            | Ca(ICCV2/PI489777)SNP_25596 | 89   | C | A | 7  | 5  | --        | --   |
| CakTC28467 | Ca(ICCV2/PI489777)SNP_25597 | 1486 | T | G | 58 | 20 | --        | --   |
|            | Ca(ICCV2/PI489777)SNP_25598 | 2240 | A | T | 19 | 6  | --        | --   |
| CakTC31802 | Ca(ICCV2/PI489777)SNP_25599 | 123  | T | C | 23 | 16 | --        | --   |

|            |                            |      |   |   |    |    |    |           |
|------------|----------------------------|------|---|---|----|----|----|-----------|
|            | Ca(ICC2/PI489777)SNP_25600 | 687  | G | T | 14 | 7  | -- | --        |
| CakTC33925 | Ca(ICC2/PI489777)SNP_25601 | 106  | C | T | 11 | 10 | -- | --        |
|            | Ca(ICC2/PI489777)SNP_25602 | 197  | C | T | 11 | 11 | -- | --        |
|            | Ca(ICC2/PI489777)SNP_25603 | 492  | C | G | 10 | 6  | -- | --        |
|            | Ca(ICC2/PI489777)SNP_25604 | 622  | T | A | 6  | 5  | -- | --        |
| CakTC24163 | Ca(ICC2/PI489777)SNP_25605 | 667  | T | C | 15 | 10 | -- | --        |
|            | Ca(ICC2/PI489777)SNP_25606 | 748  | T | G | 17 | 11 | -- | --        |
| CakTC12624 | Ca(ICC2/PI489777)SNP_25607 | 47   | G | A | 19 | 7  | -- | --        |
|            | Ca(ICC2/PI489777)SNP_25608 | 130  | C | G | 19 | 10 | -- | --        |
|            | Ca(ICC2/PI489777)SNP_25609 | 223  | T | C | 30 | 13 | -- | --        |
|            | Ca(ICC2/PI489777)SNP_25610 | 232  | C | T | 34 | 14 | -- | --        |
|            | Ca(ICC2/PI489777)SNP_25611 | 523  | T | C | 9  | 10 | -- | --        |
| CakTC34138 | Ca(ICC2/PI489777)SNP_25612 | 544  | C | T | 8  | 4  | -- | --        |
|            | Ca(ICC2/PI489777)SNP_25613 | 545  | G | A | 8  | 4  | -- | --        |
| CakTC31201 | Ca(ICC2/PI489777)SNP_25614 | 589  | C | G | 5  | 4  | -- | --        |
|            | Ca(ICC2/PI489777)SNP_25615 | 613  | A | C | 5  | 5  | -- | --        |
|            | Ca(ICC2/PI489777)SNP_25616 | 671  | T | C | 7  | 4  | -- | --        |
|            | Ca(ICC2/PI489777)SNP_25617 | 2446 | A | G | 7  | 4  | -- | --        |
|            | Ca(ICC2/PI489777)SNP_25618 | 2467 | T | G | 7  | 3  | -- | --        |
|            | Ca(ICC2/PI489777)SNP_25619 | 2511 | G | A | 7  | 3  | -- | --        |
| CakTC29930 | Ca(ICC2/PI489777)SNP_25620 | 483  | T | C | 40 | 15 | -- | --        |
|            | Ca(ICC2/PI489777)SNP_25621 | 726  | A | G | 39 | 25 | -- | --        |
|            | Ca(ICC2/PI489777)SNP_25622 | 798  | T | G | 32 | 27 | -- | --        |
|            | Ca(ICC2/PI489777)SNP_25623 | 1045 | G | A | 48 | 34 | -- | --        |
| CakTC37706 | Ca(ICC2/PI489777)SNP_25624 | 349  | C | T | 8  | 3  | -- | C2C2-GATA |
|            | Ca(ICC2/PI489777)SNP_25625 | 360  | C | G | 8  | 3  | -- | C2C2-GATA |
|            | Ca(ICC2/PI489777)SNP_25626 | 930  | C | T | 7  | 6  | -- | C2C2-GATA |
|            | Ca(ICC2/PI489777)SNP_25627 | 932  | G | C | 7  | 6  | -- | C2C2-GATA |
| CakTC26646 | Ca(ICC2/PI489777)SNP_25628 | 1146 | T | A | 35 | 11 | -- | --        |
|            | Ca(ICC2/PI489777)SNP_25629 | 2177 | T | C | 29 | 15 | -- | --        |
|            | Ca(ICC2/PI489777)SNP_25630 | 2353 | G | A | 33 | 11 | -- | --        |
|            | Ca(ICC2/PI489777)SNP_25631 | 2481 | G | A | 27 | 7  | -- | --        |
|            | Ca(ICC2/PI489777)SNP_25632 | 2514 | T | C | 33 | 7  | -- | --        |
|            | Ca(ICC2/PI489777)SNP_25633 | 3134 | C | G | 25 | 8  | -- | --        |
|            | Ca(ICC2/PI489777)SNP_25634 | 3288 | G | A | 9  | 5  | -- | --        |
| CakTC26211 | Ca(ICC2/PI489777)SNP_25635 | 808  | C | T | 14 | 14 | -- | --        |
|            | Ca(ICC2/PI489777)SNP_25636 | 1753 | C | T | 20 | 9  | -- | --        |
|            | Ca(ICC2/PI489777)SNP_25637 | 2119 | C | A | 7  | 11 | -- | --        |
| CakTC34733 | Ca(ICC2/PI489777)SNP_25638 | 353  | A | G | 7  | 6  | -- | --        |
|            | Ca(ICC2/PI489777)SNP_25639 | 809  | G | A | 13 | 3  | -- | --        |
|            | Ca(ICC2/PI489777)SNP_25640 | 1595 | C | T | 16 | 7  | -- | --        |
|            | Ca(ICC2/PI489777)SNP_25641 | 1634 | A | G | 18 | 6  | -- | --        |
| CakTC38597 | Ca(ICC2/PI489777)SNP_25642 | 890  | A | G | 8  | 5  | -- | --        |
| CakTC26612 | Ca(ICC2/PI489777)SNP_25643 | 364  | C | T | 24 | 22 | -- | --        |
|            | Ca(ICC2/PI489777)SNP_25644 | 642  | A | G | 62 | 87 | -- | --        |
| CakTC34130 | Ca(ICC2/PI489777)SNP_25645 | 411  | T | C | 11 | 9  | -- | --        |
|            | Ca(ICC2/PI489777)SNP_25646 | 576  | A | G | 9  | 8  | -- | --        |
|            | Ca(ICC2/PI489777)SNP_25647 | 651  | G | A | 8  | 8  | -- | --        |
|            | Ca(ICC2/PI489777)SNP_25648 | 660  | A | G | 8  | 8  | -- | --        |
| CakTC34221 | Ca(ICC2/PI489777)SNP_25649 | 1657 | A | T | 3  | 3  | -- | --        |
| CakTC26962 | Ca(ICC2/PI489777)SNP_25650 | 190  | G | A | 10 | 8  | -- | --        |
|            | Ca(ICC2/PI489777)SNP_25651 | 321  | A | G | 13 | 17 | -- | --        |
|            | Ca(ICC2/PI489777)SNP_25652 | 612  | C | G | 24 | 18 | -- | --        |
|            | Ca(ICC2/PI489777)SNP_25653 | 763  | A | C | 15 | 12 | -- | --        |
|            | Ca(ICC2/PI489777)SNP_25654 | 1062 | T | C | 19 | 13 | -- | --        |
|            | Ca(ICC2/PI489777)SNP_25655 | 2068 | T | C | 11 | 5  | -- | --        |
|            | Ca(ICC2/PI489777)SNP_25656 | 2725 | G | A | 7  | 5  | -- | --        |
|            | Ca(ICC2/PI489777)SNP_25657 | 3549 | C | G | 10 | 9  | -- | --        |
| CakTC23007 | Ca(ICC2/PI489777)SNP_25658 | 559  | T | C | 6  | 4  | -- | --        |
| CakTC11932 | Ca(ICC2/PI489777)SNP_25659 | 645  | C | T | 5  | 3  | -- | --        |
|            | Ca(ICC2/PI489777)SNP_25660 | 1825 | T | C | 7  | 3  | -- | --        |
|            | Ca(ICC2/PI489777)SNP_25661 | 2718 | C | A | 4  | 5  | -- | --        |
|            | Ca(ICC2/PI489777)SNP_25662 | 3195 | G | C | 3  | 3  | -- | --        |
| CakTC28272 | Ca(ICC2/PI489777)SNP_25663 | 91   | T | C | 3  | 6  | -- | --        |
| CakTC27031 | Ca(ICC2/PI489777)SNP_25664 | 495  | T | C | 26 | 14 | -- | --        |
|            | Ca(ICC2/PI489777)SNP_25665 | 894  | C | T | 19 | 15 | -- | --        |
|            | Ca(ICC2/PI489777)SNP_25666 | 1267 | T | G | 28 | 11 | -- | --        |
|            | Ca(ICC2/PI489777)SNP_25667 | 1411 | C | A | 21 | 8  | -- | --        |
| CakTC30232 | Ca(ICC2/PI489777)SNP_25668 | 124  | C | G | 4  | 6  | -- | --        |
| CakTC08976 | Ca(ICC2/PI489777)SNP_25669 | 483  | G | A | 8  | 6  | -- | --        |
| CakTC41862 | Ca(ICC2/PI489777)SNP_25670 | 312  | T | G | 5  | 3  | -- | --        |
|            | Ca(ICC2/PI489777)SNP_25671 | 593  | A | G | 25 | 10 | -- | --        |
| CakTC40060 | Ca(ICC2/PI489777)SNP_25672 | 441  | A | G | 11 | 4  | -- | --        |
|            | Ca(ICC2/PI489777)SNP_25673 | 537  | C | T | 10 | 4  | -- | --        |

|            |                            |      |   |   |     |    |        |      |
|------------|----------------------------|------|---|---|-----|----|--------|------|
|            | Ca(ICC2/PI489777)SNP_25674 | 624  | A | G | 8   | 8  | --     | --   |
|            | Ca(ICC2/PI489777)SNP_25675 | 794  | T | G | 18  | 14 | --     | --   |
|            | Ca(ICC2/PI489777)SNP_25676 | 799  | G | T | 18  | 15 | --     | --   |
| CakTC12120 | Ca(ICC2/PI489777)SNP_25677 | 1004 | T | G | 18  | 3  | --     | --   |
|            | Ca(ICC2/PI489777)SNP_25678 | 1012 | C | T | 17  | 6  | --     | --   |
|            | Ca(ICC2/PI489777)SNP_25679 | 1019 | A | G | 17  | 5  | --     | --   |
|            | Ca(ICC2/PI489777)SNP_25680 | 1187 | C | T | 23  | 19 | --     | --   |
|            | Ca(ICC2/PI489777)SNP_25681 | 1239 | A | G | 30  | 24 | --     | --   |
|            | Ca(ICC2/PI489777)SNP_25682 | 1286 | A | G | 26  | 23 | --     | --   |
|            | Ca(ICC2/PI489777)SNP_25683 | 1298 | G | A | 28  | 23 | --     | --   |
|            | Ca(ICC2/PI489777)SNP_25684 | 2227 | A | G | 10  | 18 | --     | --   |
| CakTC27132 | Ca(ICC2/PI489777)SNP_25685 | 302  | C | T | 97  | 57 | --     | --   |
|            | Ca(ICC2/PI489777)SNP_25686 | 329  | T | C | 90  | 56 | --     | --   |
|            | Ca(ICC2/PI489777)SNP_25687 | 395  | C | T | 104 | 61 | --     | --   |
|            | Ca(ICC2/PI489777)SNP_25688 | 630  | T | G | 35  | 31 | --     | --   |
| CakTC37838 | Ca(ICC2/PI489777)SNP_25689 | 644  | G | A | 6   | 3  | --     | --   |
| CakTC25195 | Ca(ICC2/PI489777)SNP_25690 | 539  | C | A | 3   | 5  | --     | --   |
|            | Ca(ICC2/PI489777)SNP_25691 | 946  | G | A | 7   | 3  | --     | --   |
|            | Ca(ICC2/PI489777)SNP_25692 | 983  | T | C | 12  | 6  | --     | --   |
|            | Ca(ICC2/PI489777)SNP_25693 | 1012 | G | C | 15  | 5  | --     | --   |
|            | Ca(ICC2/PI489777)SNP_25694 | 1026 | T | A | 15  | 6  | --     | --   |
|            | Ca(ICC2/PI489777)SNP_25695 | 1122 | T | C | 17  | 6  | --     | --   |
|            | Ca(ICC2/PI489777)SNP_25696 | 1128 | C | A | 18  | 6  | --     | --   |
|            | Ca(ICC2/PI489777)SNP_25697 | 1194 | G | A | 27  | 11 | --     | --   |
|            | Ca(ICC2/PI489777)SNP_25698 | 1731 | C | A | 13  | 8  | --     | --   |
|            | Ca(ICC2/PI489777)SNP_25699 | 1734 | A | T | 14  | 9  | --     | --   |
| CakTC38260 | Ca(ICC2/PI489777)SNP_25700 | 172  | G | A | 3   | 4  | --     | --   |
|            | Ca(ICC2/PI489777)SNP_25701 | 544  | A | G | 10  | 6  | --     | --   |
| CakTC40782 | Ca(ICC2/PI489777)SNP_25702 | 496  | G | A | 4   | 5  | --     | --   |
| CakTC31700 | Ca(ICC2/PI489777)SNP_25703 | 46   | G | T | 3   | 4  | --     | TPR  |
|            | Ca(ICC2/PI489777)SNP_25704 | 66   | A | G | 3   | 5  | --     | TPR  |
|            | Ca(ICC2/PI489777)SNP_25705 | 72   | A | C | 3   | 5  | --     | TPR  |
|            | Ca(ICC2/PI489777)SNP_25706 | 163  | T | A | 4   | 3  | --     | TPR  |
|            | Ca(ICC2/PI489777)SNP_25707 | 199  | T | A | 3   | 3  | --     | TPR  |
|            | Ca(ICC2/PI489777)SNP_25708 | 251  | A | G | 5   | 3  | --     | TPR  |
|            | Ca(ICC2/PI489777)SNP_25709 | 307  | A | C | 5   | 3  | --     | TPR  |
|            | Ca(ICC2/PI489777)SNP_25710 | 328  | C | T | 6   | 3  | --     | TPR  |
| CakTC43162 | Ca(ICC2/PI489777)SNP_25711 | 679  | T | A | 5   | 9  | --     | --   |
| CakTC12090 | Ca(ICC2/PI489777)SNP_25712 | 204  | T | G | 4   | 4  | --     | --   |
| CakTC30432 | Ca(ICC2/PI489777)SNP_25713 | 1018 | A | G | 7   | 3  | --     | --   |
|            | Ca(ICC2/PI489777)SNP_25714 | 1021 | A | G | 8   | 4  | --     | --   |
|            | Ca(ICC2/PI489777)SNP_25715 | 1041 | G | A | 8   | 4  | --     | --   |
|            | Ca(ICC2/PI489777)SNP_25716 | 1338 | C | T | 6   | 3  | --     | --   |
| CakTC09735 | Ca(ICC2/PI489777)SNP_25717 | 2577 | G | A | 4   | 3  | Mature | Leaf |
|            | Ca(ICC2/PI489777)SNP_25718 | 3545 | A | G | 6   | 3  | Mature | Leaf |
| CakTC38993 | Ca(ICC2/PI489777)SNP_25719 | 955  | A | T | 17  | 16 | --     | bZIP |
| CakTC29985 | Ca(ICC2/PI489777)SNP_25720 | 319  | C | G | 28  | 4  | --     | --   |
|            | Ca(ICC2/PI489777)SNP_25721 | 1337 | A | C | 46  | 8  | --     | --   |
|            | Ca(ICC2/PI489777)SNP_25722 | 2959 | A | C | 19  | 9  | --     | --   |
| CakTC30814 | Ca(ICC2/PI489777)SNP_25723 | 260  | T | C | 7   | 4  | --     | --   |
|            | Ca(ICC2/PI489777)SNP_25724 | 281  | A | C | 7   | 5  | --     | --   |
| CakTC30443 | Ca(ICC2/PI489777)SNP_25725 | 283  | T | G | 13  | 25 | --     | --   |
|            | Ca(ICC2/PI489777)SNP_25726 | 353  | C | T | 12  | 25 | --     | --   |
|            | Ca(ICC2/PI489777)SNP_25727 | 387  | T | C | 15  | 25 | --     | --   |
|            | Ca(ICC2/PI489777)SNP_25728 | 1106 | C | T | 9   | 13 | --     | --   |
| CakTC36286 | Ca(ICC2/PI489777)SNP_25729 | 348  | T | C | 9   | 3  | --     | --   |
|            | Ca(ICC2/PI489777)SNP_25730 | 415  | T | C | 9   | 3  | --     | --   |
|            | Ca(ICC2/PI489777)SNP_25731 | 480  | C | T | 6   | 4  | --     | --   |
| CakTC41416 | Ca(ICC2/PI489777)SNP_25732 | 462  | A | G | 20  | 34 | --     | --   |
| CakTC39602 | Ca(ICC2/PI489777)SNP_25733 | 60   | C | T | 58  | 24 | --     | --   |
|            | Ca(ICC2/PI489777)SNP_25734 | 222  | C | G | 71  | 43 | --     | --   |
|            | Ca(ICC2/PI489777)SNP_25735 | 530  | G | T | 43  | 49 | --     | --   |
|            | Ca(ICC2/PI489777)SNP_25736 | 886  | T | C | 19  | 30 | --     | --   |
| CakTC26323 | Ca(ICC2/PI489777)SNP_25737 | 47   | A | G | 6   | 3  | --     | --   |
|            | Ca(ICC2/PI489777)SNP_25738 | 304  | A | G | 31  | 12 | --     | --   |
|            | Ca(ICC2/PI489777)SNP_25739 | 540  | T | G | 26  | 10 | --     | --   |
| CakTC39591 | Ca(ICC2/PI489777)SNP_25740 | 59   | C | G | 9   | 5  | --     | --   |
|            | Ca(ICC2/PI489777)SNP_25741 | 203  | A | C | 15  | 15 | --     | --   |
|            | Ca(ICC2/PI489777)SNP_25742 | 217  | A | G | 15  | 16 | --     | --   |
|            | Ca(ICC2/PI489777)SNP_25743 | 496  | A | G | 14  | 16 | --     | --   |
|            | Ca(ICC2/PI489777)SNP_25744 | 514  | T | C | 17  | 14 | --     | --   |
|            | Ca(ICC2/PI489777)SNP_25745 | 880  | A | T | 5   | 5  | --     | --   |
|            | Ca(ICC2/PI489777)SNP_25746 | 952  | T | G | 6   | 5  | --     | --   |
| CakTC26069 | Ca(ICC2/PI489777)SNP_25747 | 678  | C | A | 28  | 26 | --     | --   |

|            |                            |      |   |   |     |     |           |      |
|------------|----------------------------|------|---|---|-----|-----|-----------|------|
|            | Ca(ICC2/PI489777)SNP_25748 | 1305 | A | G | 20  | 13  | --        | --   |
|            | Ca(ICC2/PI489777)SNP_25749 | 2062 | G | A | 27  | 44  | --        | --   |
|            | Ca(ICC2/PI489777)SNP_25750 | 2124 | T | C | 31  | 46  | --        | --   |
|            | Ca(ICC2/PI489777)SNP_25751 | 2136 | A | T | 30  | 43  | --        | --   |
|            | Ca(ICC2/PI489777)SNP_25752 | 2562 | C | G | 26  | 25  | --        | --   |
|            | Ca(ICC2/PI489777)SNP_25753 | 2580 | G | T | 20  | 15  | --        | --   |
|            | Ca(ICC2/PI489777)SNP_25754 | 2678 | T | C | 11  | 8   | --        | --   |
| CakTC11976 | Ca(ICC2/PI489777)SNP_25755 | 1262 | G | T | 7   | 5   | --        | --   |
| CakTC29492 | Ca(ICC2/PI489777)SNP_25756 | 1018 | G | A | 4   | 3   | --        | --   |
| CakTC40114 | Ca(ICC2/PI489777)SNP_25757 | 173  | G | C | 14  | 4   | --        | --   |
|            | Ca(ICC2/PI489777)SNP_25758 | 187  | A | G | 13  | 4   | --        | --   |
|            | Ca(ICC2/PI489777)SNP_25759 | 247  | C | G | 17  | 16  | --        | --   |
|            | Ca(ICC2/PI489777)SNP_25760 | 454  | T | C | 21  | 19  | --        | --   |
|            | Ca(ICC2/PI489777)SNP_25761 | 1076 | A | G | 24  | 11  | --        | --   |
| CakTC17546 | Ca(ICC2/PI489777)SNP_25762 | 371  | A | G | 9   | 5   | --        | --   |
|            | Ca(ICC2/PI489777)SNP_25763 | 502  | C | T | 7   | 7   | --        | --   |
| CakTC28636 | Ca(ICC2/PI489777)SNP_25764 | 672  | G | A | 12  | 3   | Root      | --   |
|            | Ca(ICC2/PI489777)SNP_25765 | 1038 | A | G | 7   | 4   | Root      | --   |
|            | Ca(ICC2/PI489777)SNP_25766 | 1101 | A | G | 9   | 5   | Root      | --   |
|            | Ca(ICC2/PI489777)SNP_25767 | 1188 | G | T | 23  | 10  | Root      | --   |
|            | Ca(ICC2/PI489777)SNP_25768 | 1338 | C | T | 22  | 8   | Root      | --   |
|            | Ca(ICC2/PI489777)SNP_25769 | 1593 | T | C | 24  | 13  | Root      | --   |
| CakTC27301 | Ca(ICC2/PI489777)SNP_25770 | 740  | C | A | 45  | 10  | --        | --   |
|            | Ca(ICC2/PI489777)SNP_25771 | 782  | C | T | 38  | 15  | --        | --   |
| CakTC11332 | Ca(ICC2/PI489777)SNP_25772 | 35   | G | T | 18  | 11  | --        | --   |
|            | Ca(ICC2/PI489777)SNP_25773 | 84   | A | C | 22  | 11  | --        | --   |
|            | Ca(ICC2/PI489777)SNP_25774 | 134  | A | C | 25  | 10  | --        | --   |
|            | Ca(ICC2/PI489777)SNP_25775 | 598  | T | A | 22  | 11  | --        | --   |
|            | Ca(ICC2/PI489777)SNP_25776 | 658  | G | A | 26  | 16  | --        | --   |
|            | Ca(ICC2/PI489777)SNP_25777 | 694  | C | T | 21  | 15  | --        | --   |
|            | Ca(ICC2/PI489777)SNP_25778 | 778  | T | C | 24  | 11  | --        | --   |
|            | Ca(ICC2/PI489777)SNP_25779 | 784  | G | C | 23  | 12  | --        | --   |
|            | Ca(ICC2/PI489777)SNP_25780 | 793  | G | A | 21  | 11  | --        | --   |
|            | Ca(ICC2/PI489777)SNP_25781 | 875  | T | C | 8   | 7   | --        | --   |
|            | Ca(ICC2/PI489777)SNP_25782 | 879  | C | A | 11  | 7   | --        | --   |
|            | Ca(ICC2/PI489777)SNP_25783 | 915  | C | G | 9   | 8   | --        | --   |
| CakTC36132 | Ca(ICC2/PI489777)SNP_25784 | 373  | G | T | 6   | 7   | Young_pod | --   |
|            | Ca(ICC2/PI489777)SNP_25785 | 1074 | G | T | 5   | 3   | Young_pod | --   |
|            | Ca(ICC2/PI489777)SNP_25786 | 1276 | T | C | 5   | 3   | Young_pod | --   |
| CakTC14826 | Ca(ICC2/PI489777)SNP_25787 | 755  | A | T | 3   | 4   | --        | --   |
| CakTC29773 | Ca(ICC2/PI489777)SNP_25788 | 902  | A | G | 7   | 6   | --        | --   |
|            | Ca(ICC2/PI489777)SNP_25789 | 1041 | T | A | 5   | 7   | --        | --   |
|            | Ca(ICC2/PI489777)SNP_25790 | 1160 | G | A | 4   | 8   | --        | --   |
| CakTC41126 | Ca(ICC2/PI489777)SNP_25791 | 224  | T | C | 8   | 6   | --        | --   |
|            | Ca(ICC2/PI489777)SNP_25792 | 1008 | C | T | 35  | 8   | --        | --   |
|            | Ca(ICC2/PI489777)SNP_25793 | 1459 | C | T | 20  | 15  | --        | --   |
| CakTC42333 | Ca(ICC2/PI489777)SNP_25794 | 80   | G | T | 123 | 118 | --        | --   |
| CakTC42097 | Ca(ICC2/PI489777)SNP_25795 | 1280 | T | C | 3   | 3   | --        | SNF2 |
| CakTC41012 | Ca(ICC2/PI489777)SNP_25796 | 62   | A | G | 8   | 7   | --        | --   |
|            | Ca(ICC2/PI489777)SNP_25797 | 429  | T | G | 24  | 16  | --        | --   |
| CakTC25752 | Ca(ICC2/PI489777)SNP_25798 | 1267 | G | A | 3   | 3   | Flower    | bud  |
|            | Ca(ICC2/PI489777)SNP_25799 | 1457 | T | A | 3   | 4   | Flower    | bud  |
|            | Ca(ICC2/PI489777)SNP_25800 | 1562 | G | A | 9   | 4   | Flower    | bud  |
|            | Ca(ICC2/PI489777)SNP_25801 | 1573 | T | C | 9   | 3   | Flower    | bud  |
| CakTC37551 | Ca(ICC2/PI489777)SNP_25802 | 769  | T | G | 21  | 5   | --        | --   |
|            | Ca(ICC2/PI489777)SNP_25803 | 778  | A | G | 23  | 5   | --        | --   |
|            | Ca(ICC2/PI489777)SNP_25804 | 844  | T | G | 18  | 3   | --        | --   |
|            | Ca(ICC2/PI489777)SNP_25805 | 952  | T | C | 13  | 4   | --        | --   |
|            | Ca(ICC2/PI489777)SNP_25806 | 1267 | A | G | 12  | 7   | --        | --   |
| CakTC40867 | Ca(ICC2/PI489777)SNP_25807 | 358  | C | A | 30  | 32  | --        | --   |
|            | Ca(ICC2/PI489777)SNP_25808 | 370  | A | T | 36  | 29  | --        | --   |
| CakTC41661 | Ca(ICC2/PI489777)SNP_25809 | 325  | A | T | 17  | 6   | --        | --   |
|            | Ca(ICC2/PI489777)SNP_25810 | 345  | T | C | 19  | 8   | --        | --   |
|            | Ca(ICC2/PI489777)SNP_25811 | 1356 | A | T | 28  | 12  | --        | --   |
|            | Ca(ICC2/PI489777)SNP_25812 | 1411 | G | T | 33  | 20  | --        | --   |
|            | Ca(ICC2/PI489777)SNP_25813 | 1908 | G | A | 13  | 8   | --        | --   |
|            | Ca(ICC2/PI489777)SNP_25814 | 2274 | C | T | 18  | 12  | --        | --   |
|            | Ca(ICC2/PI489777)SNP_25815 | 2289 | G | A | 17  | 11  | --        | --   |
|            | Ca(ICC2/PI489777)SNP_25816 | 2398 | G | A | 12  | 11  | --        | --   |
| CakTC41614 | Ca(ICC2/PI489777)SNP_25817 | 214  | C | T | 33  | 12  | --        | --   |
|            | Ca(ICC2/PI489777)SNP_25818 | 297  | T | C | 32  | 11  | --        | --   |
|            | Ca(ICC2/PI489777)SNP_25819 | 445  | G | A | 67  | 22  | --        | --   |
|            | Ca(ICC2/PI489777)SNP_25820 | 451  | C | T | 57  | 22  | --        | --   |
| CakTC23449 | Ca(ICC2/PI489777)SNP_25821 | 767  | A | G | 7   | 4   | --        | --   |

|            |                             |      |   |   |     |    |        |     |
|------------|-----------------------------|------|---|---|-----|----|--------|-----|
| CakTC32182 | Ca(ICCV2/PI489777)SNP_25822 | 738  | C | T | 6   | 5  | --     | --  |
| CakTC38117 | Ca(ICCV2/PI489777)SNP_25823 | 1225 | T | C | 8   | 3  | --     | --  |
|            | Ca(ICCV2/PI489777)SNP_25824 | 1493 | G | A | 6   | 3  | --     | --  |
| CakTC39026 | Ca(ICCV2/PI489777)SNP_25825 | 1151 | A | T | 15  | 24 | --     | --  |
| CakTC32708 | Ca(ICCV2/PI489777)SNP_25826 | 497  | C | T | 12  | 9  | --     | --  |
|            | Ca(ICCV2/PI489777)SNP_25827 | 856  | G | A | 16  | 4  | --     | --  |
|            | Ca(ICCV2/PI489777)SNP_25828 | 1269 | A | T | 11  | 8  | --     | --  |
| CakTC23969 | Ca(ICCV2/PI489777)SNP_25829 | 265  | G | C | 33  | 32 | --     | --  |
|            | Ca(ICCV2/PI489777)SNP_25830 | 476  | C | A | 38  | 39 | --     | --  |
|            | Ca(ICCV2/PI489777)SNP_25831 | 543  | G | T | 33  | 31 | --     | --  |
|            | Ca(ICCV2/PI489777)SNP_25832 | 717  | T | A | 26  | 10 | --     | --  |
|            | Ca(ICCV2/PI489777)SNP_25833 | 740  | G | T | 26  | 7  | --     | --  |
| CakTC42767 | Ca(ICCV2/PI489777)SNP_25834 | 1092 | C | G | 107 | 37 | --     | --  |
|            | Ca(ICCV2/PI489777)SNP_25835 | 1272 | T | C | 77  | 29 | --     | --  |
|            | Ca(ICCV2/PI489777)SNP_25836 | 1487 | G | A | 50  | 21 | --     | --  |
|            | Ca(ICCV2/PI489777)SNP_25837 | 1514 | C | T | 48  | 19 | --     | --  |
| CakTC40623 | Ca(ICCV2/PI489777)SNP_25838 | 317  | G | C | 42  | 19 | --     | --  |
|            | Ca(ICCV2/PI489777)SNP_25839 | 347  | G | T | 44  | 19 | --     | --  |
|            | Ca(ICCV2/PI489777)SNP_25840 | 440  | T | C | 36  | 22 | --     | --  |
|            | Ca(ICCV2/PI489777)SNP_25841 | 482  | T | C | 48  | 25 | --     | --  |
|            | Ca(ICCV2/PI489777)SNP_25842 | 560  | T | A | 50  | 19 | --     | --  |
|            | Ca(ICCV2/PI489777)SNP_25843 | 783  | A | G | 50  | 18 | --     | --  |
|            | Ca(ICCV2/PI489777)SNP_25844 | 887  | C | T | 59  | 16 | --     | --  |
|            | Ca(ICCV2/PI489777)SNP_25845 | 1109 | C | A | 45  | 9  | --     | --  |
|            | Ca(ICCV2/PI489777)SNP_25846 | 1172 | T | C | 44  | 12 | --     | --  |
|            | Ca(ICCV2/PI489777)SNP_25847 | 1196 | C | A | 45  | 12 | --     | --  |
| CakTC27933 | Ca(ICCV2/PI489777)SNP_25848 | 1210 | A | G | 43  | 17 | --     | --  |
| CakTC29655 | Ca(ICCV2/PI489777)SNP_25849 | 141  | G | A | 12  | 7  | --     | --  |
|            | Ca(ICCV2/PI489777)SNP_25850 | 818  | A | T | 24  | 10 | --     | --  |
| CakTC12442 | Ca(ICCV2/PI489777)SNP_25851 | 1360 | G | T | 3   | 7  | --     | --  |
|            | Ca(ICCV2/PI489777)SNP_25852 | 1393 | T | A | 3   | 7  | --     | --  |
| CakTC29103 | Ca(ICCV2/PI489777)SNP_25853 | 426  | T | C | 20  | 7  | --     | --  |
|            | Ca(ICCV2/PI489777)SNP_25854 | 505  | G | A | 23  | 10 | --     | --  |
|            | Ca(ICCV2/PI489777)SNP_25855 | 1107 | C | T | 14  | 3  | --     | --  |
|            | Ca(ICCV2/PI489777)SNP_25856 | 1595 | T | A | 9   | 3  | --     | --  |
| CakTC38414 | Ca(ICCV2/PI489777)SNP_25857 | 427  | C | G | 14  | 3  | --     | --  |
|            | Ca(ICCV2/PI489777)SNP_25858 | 573  | A | T | 14  | 3  | --     | --  |
|            | Ca(ICCV2/PI489777)SNP_25859 | 625  | T | C | 18  | 4  | --     | --  |
|            | Ca(ICCV2/PI489777)SNP_25860 | 871  | T | C | 10  | 5  | --     | --  |
|            | Ca(ICCV2/PI489777)SNP_25861 | 991  | T | A | 15  | 4  | --     | --  |
|            | Ca(ICCV2/PI489777)SNP_25862 | 1052 | T | A | 19  | 4  | --     | --  |
|            | Ca(ICCV2/PI489777)SNP_25863 | 1327 | T | C | 16  | 4  | --     | --  |
|            | Ca(ICCV2/PI489777)SNP_25864 | 1576 | G | A | 10  | 3  | --     | --  |
| CakTC36217 | Ca(ICCV2/PI489777)SNP_25865 | 282  | T | G | 5   | 7  | --     | --  |
|            | Ca(ICCV2/PI489777)SNP_25866 | 319  | A | G | 5   | 7  | --     | --  |
|            | Ca(ICCV2/PI489777)SNP_25867 | 336  | G | C | 5   | 5  | --     | --  |
|            | Ca(ICCV2/PI489777)SNP_25868 | 348  | C | T | 5   | 5  | --     | --  |
| CakTC34871 | Ca(ICCV2/PI489777)SNP_25869 | 226  | C | G | 7   | 8  | --     | --  |
|            | Ca(ICCV2/PI489777)SNP_25870 | 1030 | T | C | 12  | 8  | --     | --  |
|            | Ca(ICCV2/PI489777)SNP_25871 | 1047 | C | T | 11  | 8  | --     | --  |
|            | Ca(ICCV2/PI489777)SNP_25872 | 1196 | T | C | 16  | 13 | --     | --  |
|            | Ca(ICCV2/PI489777)SNP_25873 | 1354 | C | A | 16  | 9  | --     | --  |
|            | Ca(ICCV2/PI489777)SNP_25874 | 1525 | A | T | 17  | 7  | --     | --  |
|            | Ca(ICCV2/PI489777)SNP_25875 | 2026 | A | G | 19  | 5  | --     | --  |
|            | Ca(ICCV2/PI489777)SNP_25876 | 2331 | T | C | 16  | 5  | --     | --  |
|            | Ca(ICCV2/PI489777)SNP_25877 | 2690 | T | G | 5   | 4  | --     | --  |
|            | Ca(ICCV2/PI489777)SNP_25878 | 2695 | A | G | 5   | 4  | --     | --  |
|            | Ca(ICCV2/PI489777)SNP_25879 | 2953 | C | T | 11  | 10 | --     | --  |
| CakTC37143 | Ca(ICCV2/PI489777)SNP_25880 | 528  | C | T | 11  | 3  | --     | --  |
| CakTC28235 | Ca(ICCV2/PI489777)SNP_25881 | 1064 | C | T | 20  | 15 | --     | --  |
|            | Ca(ICCV2/PI489777)SNP_25882 | 1742 | A | G | 8   | 9  | --     | --  |
| CakTC27880 | Ca(ICCV2/PI489777)SNP_25883 | 573  | A | G | 3   | 3  | --     | --  |
|            | Ca(ICCV2/PI489777)SNP_25884 | 821  | G | A | 4   | 4  | --     | --  |
| CakTC40991 | Ca(ICCV2/PI489777)SNP_25885 | 212  | G | A | 8   | 5  | --     | --  |
|            | Ca(ICCV2/PI489777)SNP_25886 | 839  | T | C | 46  | 21 | --     | --  |
| CakTC42006 | Ca(ICCV2/PI489777)SNP_25887 | 85   | T | C | 18  | 11 | --     | --  |
|            | Ca(ICCV2/PI489777)SNP_25888 | 869  | C | A | 8   | 7  | --     | --  |
| CakTC29937 | Ca(ICCV2/PI489777)SNP_25889 | 752  | G | A | 13  | 8  | --     | --  |
| CakTC33934 | Ca(ICCV2/PI489777)SNP_25890 | 435  | T | G | 26  | 9  | --     | --  |
| CakTC32781 | Ca(ICCV2/PI489777)SNP_25891 | 945  | T | C | 5   | 4  | --     | --  |
|            | Ca(ICCV2/PI489777)SNP_25892 | 3202 | A | C | 3   | 5  | --     | --  |
|            | Ca(ICCV2/PI489777)SNP_25893 | 3363 | T | G | 3   | 3  | --     | --  |
|            | Ca(ICCV2/PI489777)SNP_25894 | 3508 | A | C | 3   | 3  | --     | --  |
| CakTC42467 | Ca(ICCV2/PI489777)SNP_25895 | 1081 | T | A | 6   | 6  | Flower | bud |

|            |                            |      |   |   |    |    |           |            |
|------------|----------------------------|------|---|---|----|----|-----------|------------|
|            | Ca(ICC2/PI489777)SNP_25896 | 1320 | T | C | 3  | 3  | Flower    | bud        |
| CakTC32282 | Ca(ICC2/PI489777)SNP_25897 | 140  | T | G | 4  | 5  | --        | --         |
| CakTC38269 | Ca(ICC2/PI489777)SNP_25898 | 384  | G | A | 7  | 4  | --        | --         |
| CakTC26805 | Ca(ICC2/PI489777)SNP_25899 | 941  | A | G | 23 | 15 | --        | Alfin-like |
| CakTC42149 | Ca(ICC2/PI489777)SNP_25900 | 400  | C | T | 41 | 20 | --        | --         |
|            | Ca(ICC2/PI489777)SNP_25901 | 592  | C | T | 24 | 7  | --        | --         |
| CakTC29160 | Ca(ICC2/PI489777)SNP_25902 | 562  | G | T | 10 | 6  | --        | --         |
| CakTC25876 | Ca(ICC2/PI489777)SNP_25903 | 948  | T | C | 8  | 3  | --        | --         |
|            | Ca(ICC2/PI489777)SNP_25904 | 1279 | G | T | 7  | 7  | --        | --         |
|            | Ca(ICC2/PI489777)SNP_25905 | 1375 | T | C | 10 | 3  | --        | --         |
|            | Ca(ICC2/PI489777)SNP_25906 | 1397 | T | C | 9  | 3  | --        | --         |
|            | Ca(ICC2/PI489777)SNP_25907 | 1431 | T | C | 10 | 3  | --        | --         |
|            | Ca(ICC2/PI489777)SNP_25908 | 2012 | T | C | 7  | 3  | --        | --         |
|            | Ca(ICC2/PI489777)SNP_25909 | 2032 | T | C | 5  | 3  | --        | --         |
|            | Ca(ICC2/PI489777)SNP_25910 | 2033 | G | T | 8  | 3  | --        | --         |
|            | Ca(ICC2/PI489777)SNP_25911 | 2113 | C | T | 13 | 4  | --        | --         |
|            | Ca(ICC2/PI489777)SNP_25912 | 2370 | C | T | 16 | 4  | --        | --         |
|            | Ca(ICC2/PI489777)SNP_25913 | 2391 | T | A | 16 | 5  | --        | --         |
|            | Ca(ICC2/PI489777)SNP_25914 | 2768 | C | G | 6  | 6  | --        | --         |
|            | Ca(ICC2/PI489777)SNP_25915 | 2831 | G | A | 9  | 8  | --        | --         |
|            | Ca(ICC2/PI489777)SNP_25916 | 2839 | T | C | 9  | 7  | --        | --         |
| CakTC26522 | Ca(ICC2/PI489777)SNP_25917 | 58   | T | A | 14 | 4  | --        | --         |
|            | Ca(ICC2/PI489777)SNP_25918 | 251  | T | C | 30 | 15 | --        | --         |
| CakTC28822 | Ca(ICC2/PI489777)SNP_25919 | 231  | C | T | 6  | 7  | --        | --         |
|            | Ca(ICC2/PI489777)SNP_25920 | 378  | T | C | 7  | 6  | --        | --         |
|            | Ca(ICC2/PI489777)SNP_25921 | 570  | T | A | 9  | 4  | --        | --         |
| CakTC24964 | Ca(ICC2/PI489777)SNP_25922 | 394  | C | T | 66 | 24 | --        | HB         |
| CakTC31117 | Ca(ICC2/PI489777)SNP_25923 | 101  | T | C | 3  | 7  | Young_pod | --         |
| CakTC42329 | Ca(ICC2/PI489777)SNP_25924 | 465  | C | T | 7  | 6  | --        | --         |
| CakTC12602 | Ca(ICC2/PI489777)SNP_25925 | 185  | A | G | 10 | 7  | --        | --         |
|            | Ca(ICC2/PI489777)SNP_25926 | 250  | G | A | 13 | 8  | --        | --         |
| CakTC42926 | Ca(ICC2/PI489777)SNP_25927 | 852  | A | G | 8  | 6  | --        | MBF1       |
| CakTC27628 | Ca(ICC2/PI489777)SNP_25928 | 904  | G | A | 6  | 15 | --        | --         |
|            | Ca(ICC2/PI489777)SNP_25929 | 1440 | G | A | 4  | 5  | --        | --         |
|            | Ca(ICC2/PI489777)SNP_25930 | 1455 | C | T | 4  | 5  | --        | --         |
|            | Ca(ICC2/PI489777)SNP_25931 | 1896 | G | A | 3  | 4  | --        | --         |
|            | Ca(ICC2/PI489777)SNP_25932 | 2440 | T | A | 6  | 17 | --        | --         |
| CakTC38071 | Ca(ICC2/PI489777)SNP_25933 | 240  | C | T | 20 | 9  | --        | --         |
|            | Ca(ICC2/PI489777)SNP_25934 | 852  | C | T | 12 | 14 | --        | --         |
| CakTC33831 | Ca(ICC2/PI489777)SNP_25935 | 616  | G | A | 3  | 11 | --        | --         |
| CakTC35241 | Ca(ICC2/PI489777)SNP_25936 | 193  | T | C | 23 | 13 | --        | --         |
|            | Ca(ICC2/PI489777)SNP_25937 | 274  | C | T | 27 | 16 | --        | --         |
|            | Ca(ICC2/PI489777)SNP_25938 | 448  | C | T | 29 | 15 | --        | --         |
|            | Ca(ICC2/PI489777)SNP_25939 | 466  | C | A | 30 | 21 | --        | --         |
|            | Ca(ICC2/PI489777)SNP_25940 | 493  | C | T | 28 | 23 | --        | --         |
|            | Ca(ICC2/PI489777)SNP_25941 | 589  | T | G | 31 | 21 | --        | --         |
|            | Ca(ICC2/PI489777)SNP_25942 | 768  | G | A | 41 | 27 | --        | --         |
|            | Ca(ICC2/PI489777)SNP_25943 | 1178 | C | G | 25 | 25 | --        | --         |
|            | Ca(ICC2/PI489777)SNP_25944 | 1384 | G | A | 23 | 14 | --        | --         |
|            | Ca(ICC2/PI489777)SNP_25945 | 1857 | G | T | 28 | 17 | --        | --         |
|            | Ca(ICC2/PI489777)SNP_25946 | 2083 | G | C | 40 | 19 | --        | --         |
|            | Ca(ICC2/PI489777)SNP_25947 | 2575 | A | G | 16 | 15 | --        | --         |
|            | Ca(ICC2/PI489777)SNP_25948 | 3032 | T | C | 35 | 19 | --        | --         |
|            | Ca(ICC2/PI489777)SNP_25949 | 3067 | T | G | 34 | 15 | --        | --         |
| CakTC32612 | Ca(ICC2/PI489777)SNP_25950 | 1241 | A | G | 3  | 3  | --        | --         |
| CakTC27869 | Ca(ICC2/PI489777)SNP_25951 | 409  | G | A | 4  | 4  | --        | --         |
|            | Ca(ICC2/PI489777)SNP_25952 | 791  | C | T | 6  | 7  | --        | --         |
|            | Ca(ICC2/PI489777)SNP_25953 | 1349 | G | A | 9  | 8  | --        | --         |
|            | Ca(ICC2/PI489777)SNP_25954 | 1483 | A | G | 6  | 3  | --        | --         |
| CakTC37191 | Ca(ICC2/PI489777)SNP_25955 | 146  | C | A | 9  | 7  | --        | --         |
|            | Ca(ICC2/PI489777)SNP_25956 | 235  | T | C | 13 | 12 | --        | --         |
|            | Ca(ICC2/PI489777)SNP_25957 | 394  | A | T | 13 | 14 | --        | --         |
|            | Ca(ICC2/PI489777)SNP_25958 | 688  | C | T | 17 | 5  | --        | --         |
| CakTC42651 | Ca(ICC2/PI489777)SNP_25959 | 698  | G | A | 9  | 7  | --        | --         |
|            | Ca(ICC2/PI489777)SNP_25960 | 711  | A | G | 9  | 3  | --        | --         |
|            | Ca(ICC2/PI489777)SNP_25961 | 808  | A | G | 7  | 4  | --        | --         |
|            | Ca(ICC2/PI489777)SNP_25962 | 823  | G | A | 6  | 4  | --        | --         |
|            | Ca(ICC2/PI489777)SNP_25963 | 834  | T | G | 6  | 3  | --        | --         |
|            | Ca(ICC2/PI489777)SNP_25964 | 847  | C | A | 6  | 4  | --        | --         |
| CakTC15321 | Ca(ICC2/PI489777)SNP_25965 | 2641 | A | C | 4  | 3  | --        | --         |
|            | Ca(ICC2/PI489777)SNP_25966 | 2772 | T | C | 6  | 4  | --        | --         |
| CakTC38381 | Ca(ICC2/PI489777)SNP_25967 | 1116 | C | T | 3  | 10 | --        | --         |
| CakTC40360 | Ca(ICC2/PI489777)SNP_25968 | 277  | T | C | 20 | 17 | --        | MADS       |
| CakTC34870 | Ca(ICC2/PI489777)SNP_25969 | 1787 | A | G | 3  | 3  | --        | --         |

|            |                            |      |   |   |     |    |           |         |
|------------|----------------------------|------|---|---|-----|----|-----------|---------|
| CakTC09946 | Ca(ICC2/PI489777)SNP_25970 | 1308 | T | C | 60  | 59 | --        | AUX/IAA |
| CakTC29683 | Ca(ICC2/PI489777)SNP_25971 | 545  | C | T | 14  | 6  | Flower    | bud     |
| CakTC41790 | Ca(ICC2/PI489777)SNP_25972 | 169  | T | C | 5   | 11 | --        | --      |
|            | Ca(ICC2/PI489777)SNP_25973 | 413  | T | C | 17  | 10 | --        | --      |
|            | Ca(ICC2/PI489777)SNP_25974 | 1703 | T | C | 21  | 12 | --        | --      |
| CakTC08186 | Ca(ICC2/PI489777)SNP_25975 | 801  | T | C | 7   | 10 | --        | --      |
| CakTC24138 | Ca(ICC2/PI489777)SNP_25976 | 918  | A | G | 7   | 4  | --        | --      |
| CakTC38012 | Ca(ICC2/PI489777)SNP_25977 | 317  | C | T | 8   | 3  | --        | HSF     |
| CakTC22636 | Ca(ICC2/PI489777)SNP_25978 | 1547 | A | G | 36  | 19 | --        | --      |
|            | Ca(ICC2/PI489777)SNP_25979 | 1581 | C | T | 44  | 19 | --        | --      |
|            | Ca(ICC2/PI489777)SNP_25980 | 1774 | G | C | 46  | 14 | --        | --      |
|            | Ca(ICC2/PI489777)SNP_25981 | 1927 | C | T | 47  | 27 | --        | --      |
| CakTC40753 | Ca(ICC2/PI489777)SNP_25982 | 1086 | A | T | 3   | 9  | Young_pod | --      |
|            | Ca(ICC2/PI489777)SNP_25983 | 1163 | G | A | 4   | 6  | Young_pod | --      |
| CakTC06236 | Ca(ICC2/PI489777)SNP_25984 | 737  | C | G | 3   | 6  | --        | --      |
| CakTC42785 | Ca(ICC2/PI489777)SNP_25985 | 21   | A | T | 10  | 5  | --        | --      |
|            | Ca(ICC2/PI489777)SNP_25986 | 44   | T | C | 10  | 7  | --        | --      |
|            | Ca(ICC2/PI489777)SNP_25987 | 150  | C | A | 10  | 7  | --        | --      |
|            | Ca(ICC2/PI489777)SNP_25988 | 239  | T | A | 11  | 7  | --        | --      |
|            | Ca(ICC2/PI489777)SNP_25989 | 418  | T | C | 3   | 3  | --        | --      |
| CakTC28655 | Ca(ICC2/PI489777)SNP_25990 | 56   | T | C | 42  | 26 | --        | --      |
|            | Ca(ICC2/PI489777)SNP_25991 | 233  | A | G | 118 | 64 | --        | --      |
|            | Ca(ICC2/PI489777)SNP_25992 | 266  | C | T | 158 | 71 | --        | --      |
|            | Ca(ICC2/PI489777)SNP_25993 | 285  | G | A | 138 | 75 | --        | --      |
|            | Ca(ICC2/PI489777)SNP_25994 | 286  | T | A | 145 | 76 | --        | --      |
|            | Ca(ICC2/PI489777)SNP_25995 | 306  | A | G | 153 | 78 | --        | --      |
|            | Ca(ICC2/PI489777)SNP_25996 | 443  | A | G | 160 | 95 | --        | --      |
|            | Ca(ICC2/PI489777)SNP_25997 | 851  | T | A | 41  | 13 | --        | --      |
| CakTC31446 | Ca(ICC2/PI489777)SNP_25998 | 159  | T | C | 3   | 8  | --        | --      |
| CakTC39035 | Ca(ICC2/PI489777)SNP_25999 | 548  | C | G | 8   | 4  | --        | C3H     |
|            | Ca(ICC2/PI489777)SNP_26000 | 994  | C | T | 8   | 14 | --        | C3H     |
| CakTC26117 | Ca(ICC2/PI489777)SNP_26001 | 117  | T | C | 11  | 3  | --        | TPR     |
|            | Ca(ICC2/PI489777)SNP_26002 | 146  | C | T | 11  | 3  | --        | TPR     |
|            | Ca(ICC2/PI489777)SNP_26003 | 294  | A | G | 11  | 5  | --        | TPR     |
| CakTC39144 | Ca(ICC2/PI489777)SNP_26004 | 610  | T | C | 5   | 3  | --        | --      |
|            | Ca(ICC2/PI489777)SNP_26005 | 649  | T | C | 6   | 3  | --        | --      |
|            | Ca(ICC2/PI489777)SNP_26006 | 683  | T | A | 4   | 3  | --        | --      |
|            | Ca(ICC2/PI489777)SNP_26007 | 1099 | C | T | 10  | 8  | --        | --      |
| CakTC41800 | Ca(ICC2/PI489777)SNP_26008 | 1904 | T | C | 8   | 4  | --        | --      |
| CakTC42023 | Ca(ICC2/PI489777)SNP_26009 | 761  | A | G | 11  | 6  | --        | --      |
|            | Ca(ICC2/PI489777)SNP_26010 | 1214 | C | A | 16  | 5  | --        | --      |
|            | Ca(ICC2/PI489777)SNP_26011 | 1451 | T | A | 9   | 5  | --        | --      |
|            | Ca(ICC2/PI489777)SNP_26012 | 1564 | C | T | 8   | 5  | --        | --      |
|            | Ca(ICC2/PI489777)SNP_26013 | 1665 | A | T | 10  | 3  | --        | --      |
| CakTC29456 | Ca(ICC2/PI489777)SNP_26014 | 22   | C | A | 7   | 3  | --        | --      |
|            | Ca(ICC2/PI489777)SNP_26015 | 145  | T | C | 8   | 5  | --        | --      |
|            | Ca(ICC2/PI489777)SNP_26016 | 237  | A | G | 9   | 6  | --        | --      |
|            | Ca(ICC2/PI489777)SNP_26017 | 239  | G | T | 9   | 6  | --        | --      |
|            | Ca(ICC2/PI489777)SNP_26018 | 262  | A | C | 8   | 6  | --        | --      |
|            | Ca(ICC2/PI489777)SNP_26019 | 358  | C | T | 7   | 6  | --        | --      |
|            | Ca(ICC2/PI489777)SNP_26020 | 391  | C | A | 6   | 4  | --        | --      |
|            | Ca(ICC2/PI489777)SNP_26021 | 613  | A | T | 4   | 5  | --        | --      |
| CakTC32858 | Ca(ICC2/PI489777)SNP_26022 | 248  | C | T | 9   | 4  | --        | --      |
|            | Ca(ICC2/PI489777)SNP_26023 | 656  | C | T | 14  | 9  | --        | --      |
|            | Ca(ICC2/PI489777)SNP_26024 | 794  | C | A | 10  | 14 | --        | --      |
|            | Ca(ICC2/PI489777)SNP_26025 | 1808 | T | A | 12  | 8  | --        | --      |
|            | Ca(ICC2/PI489777)SNP_26026 | 1917 | T | C | 8   | 8  | --        | --      |
| CakTC34277 | Ca(ICC2/PI489777)SNP_26027 | 59   | A | G | 5   | 9  | --        | --      |
|            | Ca(ICC2/PI489777)SNP_26028 | 91   | A | G | 7   | 10 | --        | --      |
| CakTC03814 | Ca(ICC2/PI489777)SNP_26029 | 516  | A | C | 3   | 7  | --        | --      |
|            | Ca(ICC2/PI489777)SNP_26030 | 791  | C | T | 5   | 8  | --        | --      |
| CakTC39362 | Ca(ICC2/PI489777)SNP_26031 | 348  | C | T | 50  | 12 | --        | --      |
|            | Ca(ICC2/PI489777)SNP_26032 | 357  | T | C | 49  | 11 | --        | --      |
|            | Ca(ICC2/PI489777)SNP_26033 | 501  | C | T | 42  | 7  | --        | --      |
|            | Ca(ICC2/PI489777)SNP_26034 | 776  | G | A | 36  | 14 | --        | --      |
|            | Ca(ICC2/PI489777)SNP_26035 | 807  | C | T | 36  | 16 | --        | --      |
| CakTC29174 | Ca(ICC2/PI489777)SNP_26036 | 71   | C | G | 11  | 8  | --        | --      |
| CakTC24587 | Ca(ICC2/PI489777)SNP_26037 | 593  | G | A | 28  | 18 | --        | --      |
|            | Ca(ICC2/PI489777)SNP_26038 | 731  | T | C | 35  | 20 | --        | --      |
|            | Ca(ICC2/PI489777)SNP_26039 | 991  | C | T | 9   | 5  | --        | --      |
| CakTC40618 | Ca(ICC2/PI489777)SNP_26040 | 130  | G | C | 9   | 9  | --        | --      |
|            | Ca(ICC2/PI489777)SNP_26041 | 332  | T | C | 17  | 13 | --        | --      |
|            | Ca(ICC2/PI489777)SNP_26042 | 420  | C | A | 15  | 13 | --        | --      |
|            | Ca(ICC2/PI489777)SNP_26043 | 1667 | C | T | 28  | 10 | --        | --      |



|            |                             |      |   |   |    |     |           |       |
|------------|-----------------------------|------|---|---|----|-----|-----------|-------|
|            | Ca(ICCV2/PI489777)SNP_26044 | 1679 | A | G | 29 | 10  | --        | --    |
| CakTC10331 | Ca(ICCV2/PI489777)SNP_26045 | 149  | T | C | 4  | 6   | --        | --    |
| CakTC29085 | Ca(ICCV2/PI489777)SNP_26046 | 118  | A | G | 14 | 4   | --        | --    |
| CakTC23627 | Ca(ICCV2/PI489777)SNP_26047 | 244  | C | A | 3  | 5   | --        | --    |
| CakTC32566 | Ca(ICCV2/PI489777)SNP_26048 | 381  | T | G | 10 | 6   | --        | --    |
| CakTC41864 | Ca(ICCV2/PI489777)SNP_26049 | 905  | G | T | 23 | 3   | --        | --    |
| CakTC34953 | Ca(ICCV2/PI489777)SNP_26050 | 734  | A | G | 4  | 3   | Young_pod | --    |
| CakTC39461 | Ca(ICCV2/PI489777)SNP_26051 | 847  | C | T | 13 | 16  | --        | --    |
|            | Ca(ICCV2/PI489777)SNP_26052 | 948  | A | C | 6  | 12  | --        | --    |
|            | Ca(ICCV2/PI489777)SNP_26053 | 1043 | A | G | 10 | 12  | --        | --    |
|            | Ca(ICCV2/PI489777)SNP_26054 | 1050 | T | C | 12 | 12  | --        | --    |
| CakTC11479 | Ca(ICCV2/PI489777)SNP_26055 | 382  | T | C | 15 | 3   | --        | --    |
|            | Ca(ICCV2/PI489777)SNP_26056 | 562  | A | G | 8  | 3   | --        | --    |
| CakTC31037 | Ca(ICCV2/PI489777)SNP_26057 | 349  | T | C | 6  | 10  | --        | --    |
|            | Ca(ICCV2/PI489777)SNP_26058 | 781  | G | A | 10 | 13  | --        | --    |
|            | Ca(ICCV2/PI489777)SNP_26059 | 2038 | T | C | 5  | 4   | --        | --    |
| CakTC28096 | Ca(ICCV2/PI489777)SNP_26060 | 1895 | C | T | 26 | 15  | --        | --    |
|            | Ca(ICCV2/PI489777)SNP_26061 | 1916 | C | T | 25 | 16  | --        | --    |
|            | Ca(ICCV2/PI489777)SNP_26062 | 1928 | G | A | 22 | 11  | --        | --    |
|            | Ca(ICCV2/PI489777)SNP_26063 | 2096 | C | T | 24 | 9   | --        | --    |
|            | Ca(ICCV2/PI489777)SNP_26064 | 2482 | C | A | 24 | 17  | --        | --    |
|            | Ca(ICCV2/PI489777)SNP_26065 | 2600 | T | C | 13 | 9   | --        | --    |
|            | Ca(ICCV2/PI489777)SNP_26066 | 2636 | G | A | 15 | 6   | --        | --    |
| CakTC38490 | Ca(ICCV2/PI489777)SNP_26067 | 649  | T | C | 7  | 5   | --        | --    |
|            | Ca(ICCV2/PI489777)SNP_26068 | 776  | A | G | 9  | 4   | --        | --    |
|            | Ca(ICCV2/PI489777)SNP_26069 | 880  | T | A | 12 | 3   | --        | --    |
|            | Ca(ICCV2/PI489777)SNP_26070 | 883  | A | G | 12 | 3   | --        | --    |
|            | Ca(ICCV2/PI489777)SNP_26071 | 928  | G | A | 10 | 4   | --        | --    |
| CakTC41272 | Ca(ICCV2/PI489777)SNP_26072 | 357  | A | G | 79 | 252 | --        | --    |
|            | Ca(ICCV2/PI489777)SNP_26073 | 461  | C | A | 94 | 253 | --        | --    |
| CakTC35471 | Ca(ICCV2/PI489777)SNP_26074 | 2250 | T | C | 9  | 6   | --        | --    |
|            | Ca(ICCV2/PI489777)SNP_26075 | 3260 | A | G | 22 | 17  | --        | --    |
|            | Ca(ICCV2/PI489777)SNP_26076 | 3473 | C | A | 8  | 12  | --        | --    |
| CakTC11581 | Ca(ICCV2/PI489777)SNP_26077 | 436  | T | G | 4  | 3   | --        | --    |
|            | Ca(ICCV2/PI489777)SNP_26078 | 437  | C | A | 4  | 3   | --        | --    |
| CakTC27729 | Ca(ICCV2/PI489777)SNP_26079 | 1070 | T | A | 6  | 5   | --        | --    |
| CakTC43241 | Ca(ICCV2/PI489777)SNP_26080 | 483  | T | A | 11 | 15  | --        | --    |
|            | Ca(ICCV2/PI489777)SNP_26081 | 663  | T | C | 4  | 11  | --        | --    |
| CakTC23430 | Ca(ICCV2/PI489777)SNP_26082 | 415  | T | G | 7  | 4   | Root      | --    |
|            | Ca(ICCV2/PI489777)SNP_26083 | 421  | A | G | 6  | 5   | Root      | --    |
|            | Ca(ICCV2/PI489777)SNP_26084 | 432  | G | C | 7  | 5   | Root      | --    |
|            | Ca(ICCV2/PI489777)SNP_26085 | 434  | T | A | 8  | 4   | Root      | --    |
|            | Ca(ICCV2/PI489777)SNP_26086 | 663  | G | A | 10 | 6   | Root      | --    |
|            | Ca(ICCV2/PI489777)SNP_26087 | 715  | T | C | 15 | 3   | Root      | --    |
| CakTC40134 | Ca(ICCV2/PI489777)SNP_26088 | 480  | C | A | 26 | 7   | --        | --    |
|            | Ca(ICCV2/PI489777)SNP_26089 | 503  | G | A | 26 | 8   | --        | --    |
|            | Ca(ICCV2/PI489777)SNP_26090 | 556  | A | G | 28 | 15  | --        | --    |
|            | Ca(ICCV2/PI489777)SNP_26091 | 835  | G | T | 55 | 26  | --        | --    |
| CakTC11110 | Ca(ICCV2/PI489777)SNP_26092 | 702  | T | C | 30 | 18  | --        | --    |
|            | Ca(ICCV2/PI489777)SNP_26093 | 738  | T | C | 28 | 21  | --        | --    |
|            | Ca(ICCV2/PI489777)SNP_26094 | 1315 | C | T | 49 | 12  | --        | --    |
| CakTC36388 | Ca(ICCV2/PI489777)SNP_26095 | 124  | T | C | 4  | 6   | --        | --    |
|            | Ca(ICCV2/PI489777)SNP_26096 | 301  | A | G | 11 | 18  | --        | --    |
|            | Ca(ICCV2/PI489777)SNP_26097 | 317  | G | C | 11 | 19  | --        | --    |
| CakTC40427 | Ca(ICCV2/PI489777)SNP_26098 | 353  | A | C | 17 | 5   | --        | --    |
|            | Ca(ICCV2/PI489777)SNP_26099 | 583  | A | G | 15 | 12  | --        | --    |
|            | Ca(ICCV2/PI489777)SNP_26100 | 656  | T | C | 15 | 9   | --        | --    |
|            | Ca(ICCV2/PI489777)SNP_26101 | 963  | T | G | 36 | 8   | --        | --    |
|            | Ca(ICCV2/PI489777)SNP_26102 | 1791 | G | C | 6  | 10  | --        | --    |
| CakTC34684 | Ca(ICCV2/PI489777)SNP_26103 | 1127 | A | C | 9  | 6   | --        | --    |
|            | Ca(ICCV2/PI489777)SNP_26104 | 2073 | T | C | 6  | 4   | --        | --    |
|            | Ca(ICCV2/PI489777)SNP_26105 | 2729 | A | T | 9  | 9   | --        | --    |
| CakTC37663 | Ca(ICCV2/PI489777)SNP_26106 | 873  | C | A | 17 | 21  | --        | --    |
|            | Ca(ICCV2/PI489777)SNP_26107 | 1030 | A | T | 12 | 11  | --        | --    |
|            | Ca(ICCV2/PI489777)SNP_26108 | 1419 | A | T | 10 | 6   | --        | --    |
|            | Ca(ICCV2/PI489777)SNP_26109 | 1518 | A | T | 11 | 3   | --        | --    |
|            | Ca(ICCV2/PI489777)SNP_26110 | 1520 | C | T | 11 | 3   | --        | --    |
| CakTC42954 | Ca(ICCV2/PI489777)SNP_26111 | 524  | T | G | 3  | 3   | --        | --    |
| CakTC26638 | Ca(ICCV2/PI489777)SNP_26112 | 555  | G | A | 59 | 13  | --        | --    |
|            | Ca(ICCV2/PI489777)SNP_26113 | 743  | C | T | 26 | 4   | --        | --    |
| CakTC41527 | Ca(ICCV2/PI489777)SNP_26114 | 209  | T | C | 13 | 40  | --        | CCAAT |
| CakTC11858 | Ca(ICCV2/PI489777)SNP_26115 | 244  | A | G | 6  | 3   | Flower    | bud   |
| CakTC37781 | Ca(ICCV2/PI489777)SNP_26116 | 1225 | C | T | 32 | 12  | --        | --    |
| CakTC40016 | Ca(ICCV2/PI489777)SNP_26117 | 124  | A | T | 5  | 8   | --        | --    |

|            |                            |      |   |   |     |    |    |           |
|------------|----------------------------|------|---|---|-----|----|----|-----------|
|            | Ca(ICC2/PI489777)SNP_26118 | 360  | A | G | 7   | 15 | -- | --        |
|            | Ca(ICC2/PI489777)SNP_26119 | 452  | C | G | 9   | 15 | -- | --        |
|            | Ca(ICC2/PI489777)SNP_26120 | 573  | G | A | 6   | 7  | -- | --        |
|            | Ca(ICC2/PI489777)SNP_26121 | 1227 | T | G | 6   | 8  | -- | --        |
|            | Ca(ICC2/PI489777)SNP_26122 | 1511 | C | G | 8   | 4  | -- | --        |
|            | Ca(ICC2/PI489777)SNP_26123 | 1522 | G | A | 7   | 4  | -- | --        |
|            | Ca(ICC2/PI489777)SNP_26124 | 1570 | C | G | 4   | 4  | -- | --        |
| CakTC24064 | Ca(ICC2/PI489777)SNP_26125 | 422  | G | C | 6   | 3  | -- | AP2-EREBP |
|            | Ca(ICC2/PI489777)SNP_26126 | 433  | C | T | 7   | 3  | -- | AP2-EREBP |
|            | Ca(ICC2/PI489777)SNP_26127 | 1381 | C | A | 8   | 7  | -- | AP2-EREBP |
|            | Ca(ICC2/PI489777)SNP_26128 | 1390 | A | G | 6   | 7  | -- | AP2-EREBP |
|            | Ca(ICC2/PI489777)SNP_26129 | 1507 | A | G | 9   | 10 | -- | AP2-EREBP |
|            | Ca(ICC2/PI489777)SNP_26130 | 1675 | A | G | 5   | 15 | -- | AP2-EREBP |
| CakTC07500 | Ca(ICC2/PI489777)SNP_26131 | 929  | T | A | 5   | 10 | -- | --        |
| CakTC34897 | Ca(ICC2/PI489777)SNP_26132 | 2442 | T | C | 10  | 5  | -- | --        |
|            | Ca(ICC2/PI489777)SNP_26133 | 2919 | T | C | 10  | 5  | -- | --        |
| CakTC09573 | Ca(ICC2/PI489777)SNP_26134 | 1325 | C | T | 3   | 3  | -- | --        |
| CakTC22810 | Ca(ICC2/PI489777)SNP_26135 | 65   | G | A | 38  | 5  | -- | --        |
|            | Ca(ICC2/PI489777)SNP_26136 | 99   | T | C | 104 | 35 | -- | --        |
|            | Ca(ICC2/PI489777)SNP_26137 | 105  | G | A | 120 | 67 | -- | --        |
|            | Ca(ICC2/PI489777)SNP_26138 | 151  | T | A | 152 | 74 | -- | --        |
|            | Ca(ICC2/PI489777)SNP_26139 | 157  | T | C | 184 | 71 | -- | --        |
| CakTC40082 | Ca(ICC2/PI489777)SNP_26140 | 233  | A | G | 22  | 3  | -- | --        |
|            | Ca(ICC2/PI489777)SNP_26141 | 786  | C | T | 11  | 5  | -- | --        |
|            | Ca(ICC2/PI489777)SNP_26142 | 795  | T | C | 10  | 4  | -- | --        |
| CakTC00795 | Ca(ICC2/PI489777)SNP_26143 | 352  | A | G | 30  | 22 | -- | --        |
|            | Ca(ICC2/PI489777)SNP_26144 | 364  | G | A | 31  | 24 | -- | --        |
|            | Ca(ICC2/PI489777)SNP_26145 | 400  | T | A | 34  | 24 | -- | --        |
|            | Ca(ICC2/PI489777)SNP_26146 | 406  | G | A | 34  | 31 | -- | --        |
|            | Ca(ICC2/PI489777)SNP_26147 | 559  | G | A | 37  | 40 | -- | --        |
| CakTC23727 | Ca(ICC2/PI489777)SNP_26148 | 622  | C | T | 85  | 51 | -- | --        |
|            | Ca(ICC2/PI489777)SNP_26149 | 661  | C | G | 105 | 60 | -- | --        |
|            | Ca(ICC2/PI489777)SNP_26150 | 750  | A | C | 103 | 52 | -- | --        |
| CakTC25967 | Ca(ICC2/PI489777)SNP_26151 | 626  | C | T | 28  | 9  | -- | --        |
|            | Ca(ICC2/PI489777)SNP_26152 | 637  | A | C | 26  | 7  | -- | --        |
|            | Ca(ICC2/PI489777)SNP_26153 | 1406 | C | T | 28  | 20 | -- | --        |
|            | Ca(ICC2/PI489777)SNP_26154 | 1856 | G | T | 20  | 3  | -- | --        |
|            | Ca(ICC2/PI489777)SNP_26155 | 1913 | A | C | 14  | 3  | -- | --        |
| CakTC32714 | Ca(ICC2/PI489777)SNP_26156 | 467  | A | C | 18  | 9  | -- | --        |
|            | Ca(ICC2/PI489777)SNP_26157 | 1157 | A | C | 14  | 4  | -- | --        |
| CakTC34885 | Ca(ICC2/PI489777)SNP_26158 | 556  | C | A | 12  | 4  | -- | --        |
|            | Ca(ICC2/PI489777)SNP_26159 | 808  | T | C | 7   | 6  | -- | --        |
|            | Ca(ICC2/PI489777)SNP_26160 | 1669 | T | C | 17  | 11 | -- | --        |
|            | Ca(ICC2/PI489777)SNP_26161 | 2884 | T | C | 6   | 12 | -- | --        |
| CakTC34635 | Ca(ICC2/PI489777)SNP_26162 | 580  | A | T | 3   | 7  | -- | --        |
|            | Ca(ICC2/PI489777)SNP_26163 | 601  | C | G | 3   | 6  | -- | --        |
| CakTC38088 | Ca(ICC2/PI489777)SNP_26164 | 864  | A | C | 14  | 6  | -- | --        |
|            | Ca(ICC2/PI489777)SNP_26165 | 971  | T | A | 9   | 4  | -- | --        |
|            | Ca(ICC2/PI489777)SNP_26166 | 972  | G | T | 9   | 4  | -- | --        |
| CakTC30252 | Ca(ICC2/PI489777)SNP_26167 | 1093 | T | G | 12  | 3  | -- | --        |
| CakTC34442 | Ca(ICC2/PI489777)SNP_26168 | 212  | G | A | 17  | 4  | -- | --        |
|            | Ca(ICC2/PI489777)SNP_26169 | 311  | G | C | 20  | 4  | -- | --        |
| CakTC22734 | Ca(ICC2/PI489777)SNP_26170 | 34   | C | G | 3   | 5  | -- | --        |
|            | Ca(ICC2/PI489777)SNP_26171 | 1109 | A | C | 15  | 8  | -- | --        |
|            | Ca(ICC2/PI489777)SNP_26172 | 1717 | T | C | 27  | 31 | -- | --        |
|            | Ca(ICC2/PI489777)SNP_26173 | 1747 | C | T | 21  | 26 | -- | --        |
|            | Ca(ICC2/PI489777)SNP_26174 | 2168 | G | A | 17  | 9  | -- | --        |
|            | Ca(ICC2/PI489777)SNP_26175 | 2198 | T | C | 10  | 7  | -- | --        |
| CakTC29473 | Ca(ICC2/PI489777)SNP_26176 | 1279 | T | C | 25  | 11 | -- | --        |
| CakTC24020 | Ca(ICC2/PI489777)SNP_26177 | 62   | A | G | 11  | 10 | -- | --        |
|            | Ca(ICC2/PI489777)SNP_26178 | 418  | G | A | 41  | 8  | -- | --        |
|            | Ca(ICC2/PI489777)SNP_26179 | 508  | T | C | 39  | 8  | -- | --        |
|            | Ca(ICC2/PI489777)SNP_26180 | 719  | G | A | 37  | 14 | -- | --        |
|            | Ca(ICC2/PI489777)SNP_26181 | 861  | T | C | 52  | 12 | -- | --        |
|            | Ca(ICC2/PI489777)SNP_26182 | 889  | C | T | 61  | 19 | -- | --        |
|            | Ca(ICC2/PI489777)SNP_26183 | 1047 | T | C | 47  | 21 | -- | --        |
|            | Ca(ICC2/PI489777)SNP_26184 | 1050 | C | T | 50  | 22 | -- | --        |
| CakTC26988 | Ca(ICC2/PI489777)SNP_26185 | 288  | T | C | 9   | 4  | -- | --        |
|            | Ca(ICC2/PI489777)SNP_26186 | 306  | G | A | 8   | 3  | -- | --        |
| CakTC27943 | Ca(ICC2/PI489777)SNP_26187 | 1978 | C | T | 36  | 21 | -- | C3H       |
|            | Ca(ICC2/PI489777)SNP_26188 | 2239 | G | A | 23  | 20 | -- | C3H       |
|            | Ca(ICC2/PI489777)SNP_26189 | 2659 | A | C | 10  | 6  | -- | C3H       |
|            | Ca(ICC2/PI489777)SNP_26190 | 2711 | T | C | 10  | 8  | -- | C3H       |
| CakTC27976 | Ca(ICC2/PI489777)SNP_26191 | 1513 | T | C | 27  | 7  | -- | --        |

|            |                            |      |   |   |     |    |        |         |
|------------|----------------------------|------|---|---|-----|----|--------|---------|
|            | Ca(ICC2/PI489777)SNP_26192 | 2511 | A | C | 5   | 8  | --     | --      |
| CakTC38553 | Ca(ICC2/PI489777)SNP_26193 | 296  | G | A | 10  | 5  | --     | --      |
|            | Ca(ICC2/PI489777)SNP_26194 | 407  | G | A | 11  | 10 | --     | --      |
|            | Ca(ICC2/PI489777)SNP_26195 | 518  | G | C | 9   | 7  | --     | --      |
|            | Ca(ICC2/PI489777)SNP_26196 | 569  | G | A | 6   | 7  | --     | --      |
|            | Ca(ICC2/PI489777)SNP_26197 | 878  | G | A | 6   | 10 | --     | --      |
| CakTC38649 | Ca(ICC2/PI489777)SNP_26198 | 197  | A | G | 12  | 4  | --     | NAC     |
|            | Ca(ICC2/PI489777)SNP_26199 | 608  | A | G | 40  | 5  | --     | NAC     |
|            | Ca(ICC2/PI489777)SNP_26200 | 818  | C | T | 36  | 3  | --     | NAC     |
| CakTC37375 | Ca(ICC2/PI489777)SNP_26201 | 648  | C | T | 8   | 10 | --     | --      |
|            | Ca(ICC2/PI489777)SNP_26202 | 684  | A | T | 7   | 7  | --     | --      |
|            | Ca(ICC2/PI489777)SNP_26203 | 804  | C | A | 14  | 9  | --     | --      |
|            | Ca(ICC2/PI489777)SNP_26204 | 824  | C | G | 14  | 9  | --     | --      |
|            | Ca(ICC2/PI489777)SNP_26205 | 1023 | G | C | 10  | 8  | --     | --      |
| CakTC43023 | Ca(ICC2/PI489777)SNP_26206 | 168  | C | T | 3   | 8  | --     | --      |
|            | Ca(ICC2/PI489777)SNP_26207 | 523  | C | G | 6   | 6  | --     | --      |
|            | Ca(ICC2/PI489777)SNP_26208 | 699  | A | G | 3   | 3  | --     | --      |
| CakTC30318 | Ca(ICC2/PI489777)SNP_26209 | 326  | T | G | 8   | 4  | --     | --      |
|            | Ca(ICC2/PI489777)SNP_26210 | 1370 | T | C | 7   | 3  | --     | --      |
| CakTC37872 | Ca(ICC2/PI489777)SNP_26211 | 359  | A | C | 38  | 23 | --     | --      |
|            | Ca(ICC2/PI489777)SNP_26212 | 493  | A | T | 33  | 26 | --     | --      |
|            | Ca(ICC2/PI489777)SNP_26213 | 589  | A | C | 25  | 10 | --     | --      |
|            | Ca(ICC2/PI489777)SNP_26214 | 805  | G | A | 17  | 10 | --     | --      |
|            | Ca(ICC2/PI489777)SNP_26215 | 935  | G | A | 3   | 3  | --     | --      |
| CakTC43164 | Ca(ICC2/PI489777)SNP_26216 | 641  | T | C | 3   | 11 | --     | --      |
| CakTC24286 | Ca(ICC2/PI489777)SNP_26217 | 1687 | G | A | 19  | 14 | --     | --      |
|            | Ca(ICC2/PI489777)SNP_26218 | 1714 | C | T | 21  | 14 | --     | --      |
|            | Ca(ICC2/PI489777)SNP_26219 | 1919 | A | T | 11  | 8  | --     | --      |
| CakTC36730 | Ca(ICC2/PI489777)SNP_26220 | 398  | C | A | 4   | 3  | --     | --      |
|            | Ca(ICC2/PI489777)SNP_26221 | 412  | T | C | 4   | 3  | --     | --      |
|            | Ca(ICC2/PI489777)SNP_26222 | 1477 | C | T | 3   | 3  | --     | --      |
|            | Ca(ICC2/PI489777)SNP_26223 | 1659 | T | C | 4   | 6  | --     | --      |
|            | Ca(ICC2/PI489777)SNP_26224 | 1932 | C | T | 5   | 3  | --     | --      |
|            | Ca(ICC2/PI489777)SNP_26225 | 2257 | C | T | 8   | 3  | --     | --      |
| CakTC24811 | Ca(ICC2/PI489777)SNP_26226 | 1060 | A | G | 3   | 4  | --     | --      |
|            | Ca(ICC2/PI489777)SNP_26227 | 1124 | C | T | 3   | 4  | --     | --      |
|            | Ca(ICC2/PI489777)SNP_26228 | 1249 | G | A | 3   | 4  | --     | --      |
| CakTC32303 | Ca(ICC2/PI489777)SNP_26229 | 468  | G | A | 7   | 3  | --     | --      |
|            | Ca(ICC2/PI489777)SNP_26230 | 524  | G | A | 8   | 3  | --     | --      |
| CakTC33819 | Ca(ICC2/PI489777)SNP_26231 | 1924 | A | G | 3   | 4  | Flower | bud     |
|            | Ca(ICC2/PI489777)SNP_26232 | 2002 | A | G | 5   | 4  | Flower | bud     |
| CakTC42188 | Ca(ICC2/PI489777)SNP_26233 | 204  | C | T | 14  | 10 | --     | --      |
| CakTC38894 | Ca(ICC2/PI489777)SNP_26234 | 622  | T | C | 49  | 10 | --     | --      |
|            | Ca(ICC2/PI489777)SNP_26235 | 722  | C | G | 38  | 14 | --     | --      |
| CakTC39470 | Ca(ICC2/PI489777)SNP_26236 | 734  | T | A | 104 | 32 | --     | --      |
|            | Ca(ICC2/PI489777)SNP_26237 | 750  | A | G | 103 | 29 | --     | --      |
|            | Ca(ICC2/PI489777)SNP_26238 | 969  | T | C | 94  | 20 | --     | --      |
|            | Ca(ICC2/PI489777)SNP_26239 | 1371 | C | T | 11  | 3  | --     | --      |
| CakTC39206 | Ca(ICC2/PI489777)SNP_26240 | 258  | G | A | 33  | 17 | --     | AUX/IAA |
|            | Ca(ICC2/PI489777)SNP_26241 | 391  | A | C | 31  | 16 | --     | AUX/IAA |
|            | Ca(ICC2/PI489777)SNP_26242 | 633  | G | C | 16  | 20 | --     | AUX/IAA |
|            | Ca(ICC2/PI489777)SNP_26243 | 1198 | T | C | 18  | 4  | --     | AUX/IAA |
| CakTC39548 | Ca(ICC2/PI489777)SNP_26244 | 814  | C | A | 31  | 16 | --     | --      |
|            | Ca(ICC2/PI489777)SNP_26245 | 868  | A | G | 43  | 21 | --     | --      |
| CakTC12887 | Ca(ICC2/PI489777)SNP_26246 | 445  | G | A | 9   | 25 | --     | --      |
| CakTC03352 | Ca(ICC2/PI489777)SNP_26247 | 537  | G | C | 12  | 8  | --     | --      |
|            | Ca(ICC2/PI489777)SNP_26248 | 771  | C | T | 12  | 12 | --     | --      |
|            | Ca(ICC2/PI489777)SNP_26249 | 804  | A | G | 10  | 9  | --     | --      |
|            | Ca(ICC2/PI489777)SNP_26250 | 1272 | T | C | 16  | 15 | --     | --      |
| CakTC41806 | Ca(ICC2/PI489777)SNP_26251 | 297  | T | C | 64  | 41 | --     | --      |
| CakTC14298 | Ca(ICC2/PI489777)SNP_26252 | 154  | C | T | 4   | 7  | --     | --      |
| CakTC03335 | Ca(ICC2/PI489777)SNP_26253 | 289  | C | T | 17  | 9  | --     | --      |
|            | Ca(ICC2/PI489777)SNP_26254 | 308  | T | C | 13  | 9  | --     | --      |
|            | Ca(ICC2/PI489777)SNP_26255 | 334  | C | A | 16  | 7  | --     | --      |
|            | Ca(ICC2/PI489777)SNP_26256 | 362  | T | C | 15  | 7  | --     | --      |
|            | Ca(ICC2/PI489777)SNP_26257 | 465  | C | T | 10  | 6  | --     | --      |
| CakTC41738 | Ca(ICC2/PI489777)SNP_26258 | 1006 | G | C | 16  | 13 | --     | --      |
|            | Ca(ICC2/PI489777)SNP_26259 | 1022 | G | A | 17  | 12 | --     | --      |
|            | Ca(ICC2/PI489777)SNP_26260 | 1203 | C | A | 21  | 11 | --     | --      |
| CakTC10136 | Ca(ICC2/PI489777)SNP_26261 | 1331 | A | G | 4   | 3  | --     | --      |
|            | Ca(ICC2/PI489777)SNP_26262 | 1373 | A | G | 4   | 3  | --     | --      |
|            | Ca(ICC2/PI489777)SNP_26263 | 1390 | G | A | 4   | 3  | --     | --      |
| CakTC38228 | Ca(ICC2/PI489777)SNP_26264 | 153  | G | C | 3   | 5  | --     | --      |
|            | Ca(ICC2/PI489777)SNP_26265 | 342  | G | T | 4   | 3  | --     | --      |

|            |                            |      |   |   |     |    |        |     |
|------------|----------------------------|------|---|---|-----|----|--------|-----|
|            | Ca(ICC2/PI489777)SNP_26266 | 359  | T | A | 3   | 3  | --     | --  |
| CakTC39096 | Ca(ICC2/PI489777)SNP_26267 | 485  | A | C | 8   | 6  | --     | --  |
|            | Ca(ICC2/PI489777)SNP_26268 | 554  | T | C | 8   | 5  | --     | --  |
|            | Ca(ICC2/PI489777)SNP_26269 | 869  | G | T | 9   | 6  | --     | --  |
|            | Ca(ICC2/PI489777)SNP_26270 | 875  | A | G | 9   | 7  | --     | --  |
|            | Ca(ICC2/PI489777)SNP_26271 | 917  | G | A | 8   | 8  | --     | --  |
|            | Ca(ICC2/PI489777)SNP_26272 | 975  | C | T | 8   | 8  | --     | --  |
| CakTC26105 | Ca(ICC2/PI489777)SNP_26273 | 1229 | G | A | 8   | 3  | --     | --  |
|            | Ca(ICC2/PI489777)SNP_26274 | 2128 | T | C | 3   | 3  | --     | --  |
|            | Ca(ICC2/PI489777)SNP_26275 | 2129 | G | A | 5   | 3  | --     | --  |
| CakTC37905 | Ca(ICC2/PI489777)SNP_26276 | 463  | A | G | 4   | 11 | --     | --  |
|            | Ca(ICC2/PI489777)SNP_26277 | 560  | T | C | 5   | 6  | --     | --  |
|            | Ca(ICC2/PI489777)SNP_26278 | 597  | G | A | 4   | 6  | --     | --  |
|            | Ca(ICC2/PI489777)SNP_26279 | 693  | G | A | 5   | 5  | --     | --  |
|            | Ca(ICC2/PI489777)SNP_26280 | 789  | G | A | 5   | 5  | --     | --  |
|            | Ca(ICC2/PI489777)SNP_26281 | 843  | G | A | 4   | 3  | --     | --  |
| CakTC30003 | Ca(ICC2/PI489777)SNP_26282 | 97   | T | C | 11  | 4  | Flower | bud |
|            | Ca(ICC2/PI489777)SNP_26283 | 142  | C | T | 10  | 5  | Flower | bud |
|            | Ca(ICC2/PI489777)SNP_26284 | 229  | C | T | 10  | 11 | Flower | bud |
|            | Ca(ICC2/PI489777)SNP_26285 | 234  | A | G | 13  | 11 | Flower | bud |
|            | Ca(ICC2/PI489777)SNP_26286 | 299  | G | C | 11  | 6  | Flower | bud |
|            | Ca(ICC2/PI489777)SNP_26287 | 693  | T | C | 19  | 8  | Flower | bud |
| CakTC26403 | Ca(ICC2/PI489777)SNP_26288 | 1294 | C | T | 18  | 4  | --     | --  |
|            | Ca(ICC2/PI489777)SNP_26289 | 1902 | G | C | 10  | 3  | --     | --  |
| CakTC06961 | Ca(ICC2/PI489777)SNP_26290 | 444  | A | G | 60  | 52 | --     | --  |
| CakTC10124 | Ca(ICC2/PI489777)SNP_26291 | 305  | G | C | 28  | 12 | --     | --  |
|            | Ca(ICC2/PI489777)SNP_26292 | 368  | A | G | 28  | 18 | --     | --  |
|            | Ca(ICC2/PI489777)SNP_26293 | 423  | A | G | 27  | 16 | --     | --  |
|            | Ca(ICC2/PI489777)SNP_26294 | 1136 | C | T | 12  | 6  | --     | --  |
| CakTC38063 | Ca(ICC2/PI489777)SNP_26295 | 136  | G | T | 4   | 5  | --     | --  |
|            | Ca(ICC2/PI489777)SNP_26296 | 211  | T | G | 6   | 6  | --     | --  |
|            | Ca(ICC2/PI489777)SNP_26297 | 1043 | A | G | 6   | 4  | --     | --  |
|            | Ca(ICC2/PI489777)SNP_26298 | 1273 | A | G | 6   | 6  | --     | --  |
|            | Ca(ICC2/PI489777)SNP_26299 | 1582 | G | T | 4   | 4  | --     | --  |
| CakTC25549 | Ca(ICC2/PI489777)SNP_26300 | 764  | T | G | 48  | 22 | --     | --  |
| CakTC33866 | Ca(ICC2/PI489777)SNP_26301 | 77   | C | T | 4   | 3  | --     | --  |
|            | Ca(ICC2/PI489777)SNP_26302 | 261  | T | C | 9   | 5  | --     | --  |
|            | Ca(ICC2/PI489777)SNP_26303 | 459  | G | C | 7   | 5  | --     | --  |
|            | Ca(ICC2/PI489777)SNP_26304 | 1554 | T | G | 9   | 6  | --     | --  |
|            | Ca(ICC2/PI489777)SNP_26305 | 2046 | C | T | 15  | 3  | --     | --  |
| CakTC26336 | Ca(ICC2/PI489777)SNP_26306 | 804  | G | T | 82  | 8  | --     | --  |
|            | Ca(ICC2/PI489777)SNP_26307 | 999  | G | A | 107 | 19 | --     | --  |
|            | Ca(ICC2/PI489777)SNP_26308 | 1882 | A | G | 94  | 21 | --     | --  |
|            | Ca(ICC2/PI489777)SNP_26309 | 1887 | A | G | 89  | 20 | --     | --  |
|            | Ca(ICC2/PI489777)SNP_26310 | 1900 | T | A | 84  | 18 | --     | --  |
|            | Ca(ICC2/PI489777)SNP_26311 | 1960 | G | T | 52  | 10 | --     | --  |
| CakTC34175 | Ca(ICC2/PI489777)SNP_26312 | 282  | C | T | 13  | 9  | --     | --  |
|            | Ca(ICC2/PI489777)SNP_26313 | 1755 | T | C | 10  | 9  | --     | --  |
| CakTC32953 | Ca(ICC2/PI489777)SNP_26314 | 154  | G | A | 11  | 3  | --     | --  |
|            | Ca(ICC2/PI489777)SNP_26315 | 299  | T | C | 13  | 3  | --     | --  |
| CakTC42064 | Ca(ICC2/PI489777)SNP_26316 | 445  | C | G | 27  | 11 | --     | --  |
|            | Ca(ICC2/PI489777)SNP_26317 | 1456 | G | C | 9   | 9  | --     | --  |
|            | Ca(ICC2/PI489777)SNP_26318 | 1823 | A | T | 8   | 11 | --     | --  |
| CakTC42116 | Ca(ICC2/PI489777)SNP_26319 | 429  | C | T | 4   | 4  | Flower | bud |
|            | Ca(ICC2/PI489777)SNP_26320 | 733  | A | G | 4   | 6  | Flower | bud |
| CakTC24175 | Ca(ICC2/PI489777)SNP_26321 | 602  | A | G | 27  | 25 | --     | --  |
|            | Ca(ICC2/PI489777)SNP_26322 | 1109 | T | C | 5   | 8  | --     | --  |
|            | Ca(ICC2/PI489777)SNP_26323 | 1417 | T | A | 8   | 4  | --     | --  |
| CakTC26591 | Ca(ICC2/PI489777)SNP_26324 | 480  | C | A | 58  | 43 | --     | --  |
| CakTC37553 | Ca(ICC2/PI489777)SNP_26325 | 30   | T | C | 5   | 7  | Flower | bud |
|            | Ca(ICC2/PI489777)SNP_26326 | 57   | C | T | 5   | 7  | Flower | bud |
|            | Ca(ICC2/PI489777)SNP_26327 | 83   | G | C | 5   | 11 | Flower | bud |
|            | Ca(ICC2/PI489777)SNP_26328 | 111  | G | A | 18  | 13 | Flower | bud |
|            | Ca(ICC2/PI489777)SNP_26329 | 120  | T | C | 17  | 13 | Flower | bud |
|            | Ca(ICC2/PI489777)SNP_26330 | 187  | A | G | 27  | 26 | Flower | bud |
| CakTC38751 | Ca(ICC2/PI489777)SNP_26331 | 1611 | A | G | 5   | 3  | --     | --  |
| CakTC39927 | Ca(ICC2/PI489777)SNP_26332 | 945  | C | T | 42  | 10 | --     | --  |
|            | Ca(ICC2/PI489777)SNP_26333 | 1033 | C | G | 31  | 13 | --     | --  |
|            | Ca(ICC2/PI489777)SNP_26334 | 1063 | G | A | 33  | 14 | --     | --  |
|            | Ca(ICC2/PI489777)SNP_26335 | 1121 | G | A | 12  | 10 | --     | --  |
| CakTC32646 | Ca(ICC2/PI489777)SNP_26336 | 730  | G | A | 20  | 22 | --     | --  |
|            | Ca(ICC2/PI489777)SNP_26337 | 2131 | A | G | 6   | 13 | --     | --  |
| CakTC37361 | Ca(ICC2/PI489777)SNP_26338 | 99   | G | C | 6   | 4  | --     | --  |
|            | Ca(ICC2/PI489777)SNP_26339 | 584  | C | G | 7   | 3  | --     | --  |

|            |                            |      |   |   |    |    |        |     |
|------------|----------------------------|------|---|---|----|----|--------|-----|
|            | Ca(ICC2/PI489777)SNP_26340 | 688  | G | A | 5  | 3  | --     | --  |
|            | Ca(ICC2/PI489777)SNP_26341 | 690  | T | C | 5  | 3  | --     | --  |
|            | Ca(ICC2/PI489777)SNP_26342 | 730  | C | A | 6  | 3  | --     | --  |
| CakTC29792 | Ca(ICC2/PI489777)SNP_26343 | 271  | T | C | 31 | 6  | --     | --  |
|            | Ca(ICC2/PI489777)SNP_26344 | 326  | G | A | 33 | 8  | --     | --  |
|            | Ca(ICC2/PI489777)SNP_26345 | 941  | G | A | 42 | 11 | --     | --  |
| CakTC28545 | Ca(ICC2/PI489777)SNP_26346 | 128  | G | A | 44 | 30 | --     | --  |
|            | Ca(ICC2/PI489777)SNP_26347 | 227  | T | C | 51 | 39 | --     | --  |
|            | Ca(ICC2/PI489777)SNP_26348 | 230  | G | T | 47 | 38 | --     | --  |
|            | Ca(ICC2/PI489777)SNP_26349 | 287  | C | T | 52 | 42 | --     | --  |
|            | Ca(ICC2/PI489777)SNP_26350 | 398  | C | T | 47 | 44 | --     | --  |
|            | Ca(ICC2/PI489777)SNP_26351 | 674  | C | T | 25 | 14 | --     | --  |
|            | Ca(ICC2/PI489777)SNP_26352 | 877  | T | C | 14 | 3  | --     | --  |
|            | Ca(ICC2/PI489777)SNP_26353 | 949  | G | A | 32 | 16 | --     | --  |
|            | Ca(ICC2/PI489777)SNP_26354 | 955  | T | C | 37 | 16 | --     | --  |
|            | Ca(ICC2/PI489777)SNP_26355 | 1057 | G | C | 64 | 47 | --     | --  |
|            | Ca(ICC2/PI489777)SNP_26356 | 1470 | T | C | 36 | 17 | --     | --  |
|            | Ca(ICC2/PI489777)SNP_26357 | 1588 | C | T | 20 | 11 | --     | --  |
|            | Ca(ICC2/PI489777)SNP_26358 | 1600 | T | G | 16 | 8  | --     | --  |
|            | Ca(ICC2/PI489777)SNP_26359 | 1616 | C | G | 15 | 9  | --     | --  |
| CakTC10504 | Ca(ICC2/PI489777)SNP_26360 | 1032 | A | G | 4  | 3  | --     | --  |
|            | Ca(ICC2/PI489777)SNP_26361 | 2358 | C | A | 5  | 3  | --     | --  |
| CakTC11592 | Ca(ICC2/PI489777)SNP_26362 | 221  | G | C | 30 | 5  | --     | --  |
|            | Ca(ICC2/PI489777)SNP_26363 | 358  | G | A | 33 | 5  | --     | --  |
|            | Ca(ICC2/PI489777)SNP_26364 | 445  | A | G | 35 | 12 | --     | --  |
|            | Ca(ICC2/PI489777)SNP_26365 | 551  | G | C | 34 | 13 | --     | --  |
|            | Ca(ICC2/PI489777)SNP_26366 | 772  | C | T | 30 | 13 | --     | --  |
| CakTC37255 | Ca(ICC2/PI489777)SNP_26367 | 578  | T | A | 21 | 11 | --     | --  |
|            | Ca(ICC2/PI489777)SNP_26368 | 788  | A | G | 48 | 30 | --     | --  |
| CakTC28708 | Ca(ICC2/PI489777)SNP_26369 | 740  | T | A | 4  | 3  | --     | --  |
| CakTC32097 | Ca(ICC2/PI489777)SNP_26370 | 699  | T | C | 16 | 8  | --     | --  |
| CakTC42757 | Ca(ICC2/PI489777)SNP_26371 | 832  | A | G | 6  | 4  | --     | --  |
| CakTC32049 | Ca(ICC2/PI489777)SNP_26372 | 56   | A | C | 26 | 8  | Flower | bud |
| CakTC11058 | Ca(ICC2/PI489777)SNP_26373 | 188  | G | A | 7  | 3  | --     | --  |
| CakTC42317 | Ca(ICC2/PI489777)SNP_26374 | 600  | T | C | 5  | 10 | --     | --  |
| CakTC36694 | Ca(ICC2/PI489777)SNP_26375 | 546  | A | G | 21 | 18 | --     | --  |
|            | Ca(ICC2/PI489777)SNP_26376 | 2276 | A | C | 9  | 5  | --     | --  |
|            | Ca(ICC2/PI489777)SNP_26377 | 2366 | A | G | 15 | 8  | --     | --  |
|            | Ca(ICC2/PI489777)SNP_26378 | 2576 | C | T | 21 | 11 | --     | --  |
| CakTC29259 | Ca(ICC2/PI489777)SNP_26379 | 806  | G | A | 5  | 7  | --     | --  |
|            | Ca(ICC2/PI489777)SNP_26380 | 870  | T | A | 6  | 8  | --     | --  |
|            | Ca(ICC2/PI489777)SNP_26381 | 892  | G | A | 6  | 8  | --     | --  |
|            | Ca(ICC2/PI489777)SNP_26382 | 982  | G | C | 3  | 7  | --     | --  |
|            | Ca(ICC2/PI489777)SNP_26383 | 985  | A | T | 3  | 7  | --     | --  |
| CakTC36687 | Ca(ICC2/PI489777)SNP_26384 | 189  | C | T | 9  | 17 | --     | --  |
|            | Ca(ICC2/PI489777)SNP_26385 | 298  | G | A | 9  | 18 | --     | --  |
| CakTC38412 | Ca(ICC2/PI489777)SNP_26386 | 76   | C | T | 5  | 3  | --     | --  |
|            | Ca(ICC2/PI489777)SNP_26387 | 114  | T | C | 8  | 4  | --     | --  |
|            | Ca(ICC2/PI489777)SNP_26388 | 430  | T | C | 14 | 10 | --     | --  |
|            | Ca(ICC2/PI489777)SNP_26389 | 1459 | C | T | 10 | 4  | --     | --  |
|            | Ca(ICC2/PI489777)SNP_26390 | 1469 | A | G | 11 | 4  | --     | --  |
|            | Ca(ICC2/PI489777)SNP_26391 | 1532 | A | C | 11 | 4  | --     | --  |
| CakTC41919 | Ca(ICC2/PI489777)SNP_26392 | 63   | C | A | 9  | 3  | Shoot  | --  |
|            | Ca(ICC2/PI489777)SNP_26393 | 418  | A | G | 10 | 7  | Shoot  | --  |
|            | Ca(ICC2/PI489777)SNP_26394 | 500  | G | T | 10 | 8  | Shoot  | --  |
|            | Ca(ICC2/PI489777)SNP_26395 | 520  | T | C | 8  | 8  | Shoot  | --  |
|            | Ca(ICC2/PI489777)SNP_26396 | 528  | A | G | 10 | 7  | Shoot  | --  |
|            | Ca(ICC2/PI489777)SNP_26397 | 643  | T | C | 13 | 9  | Shoot  | --  |
|            | Ca(ICC2/PI489777)SNP_26398 | 673  | G | T | 16 | 8  | Shoot  | --  |
| CakTC40993 | Ca(ICC2/PI489777)SNP_26399 | 335  | A | G | 36 | 13 | --     | --  |
|            | Ca(ICC2/PI489777)SNP_26400 | 663  | C | G | 36 | 10 | --     | --  |
| CakTC15659 | Ca(ICC2/PI489777)SNP_26401 | 133  | A | T | 4  | 5  | --     | --  |
|            | Ca(ICC2/PI489777)SNP_26402 | 139  | A | C | 3  | 5  | --     | --  |
| CakTC26387 | Ca(ICC2/PI489777)SNP_26403 | 40   | T | G | 12 | 4  | Shoot  | --  |
|            | Ca(ICC2/PI489777)SNP_26404 | 146  | G | C | 12 | 7  | Shoot  | --  |
|            | Ca(ICC2/PI489777)SNP_26405 | 212  | A | T | 12 | 8  | Shoot  | --  |
|            | Ca(ICC2/PI489777)SNP_26406 | 331  | A | T | 6  | 8  | Shoot  | --  |
| CakTC40751 | Ca(ICC2/PI489777)SNP_26407 | 124  | C | G | 13 | 22 | --     | --  |
|            | Ca(ICC2/PI489777)SNP_26408 | 583  | T | C | 12 | 21 | --     | --  |
| CakTC29417 | Ca(ICC2/PI489777)SNP_26409 | 1105 | T | A | 11 | 5  | --     | --  |
|            | Ca(ICC2/PI489777)SNP_26410 | 1198 | T | C | 12 | 3  | --     | --  |
| CakTC33220 | Ca(ICC2/PI489777)SNP_26411 | 130  | A | G | 20 | 12 | --     | --  |
|            | Ca(ICC2/PI489777)SNP_26412 | 146  | G | A | 20 | 13 | --     | --  |
|            | Ca(ICC2/PI489777)SNP_26413 | 247  | G | C | 25 | 15 | --     | --  |

|            |                            |      |   |   |     |     |       |     |
|------------|----------------------------|------|---|---|-----|-----|-------|-----|
|            | Ca(ICC2/PI489777)SNP_26414 | 1490 | T | A | 53  | 31  | --    | --  |
|            | Ca(ICC2/PI489777)SNP_26415 | 1639 | C | T | 63  | 28  | --    | --  |
|            | Ca(ICC2/PI489777)SNP_26416 | 1801 | T | C | 54  | 19  | --    | --  |
| CakTC42866 | Ca(ICC2/PI489777)SNP_26417 | 136  | C | T | 6   | 4   | --    | --  |
|            | Ca(ICC2/PI489777)SNP_26418 | 553  | G | A | 45  | 27  | --    | --  |
| CakTC39216 | Ca(ICC2/PI489777)SNP_26419 | 519  | G | T | 9   | 27  | --    | --  |
| CakTC25714 | Ca(ICC2/PI489777)SNP_26420 | 49   | C | G | 7   | 5   | Root  | --  |
|            | Ca(ICC2/PI489777)SNP_26421 | 494  | T | C | 15  | 11  | Root  | --  |
|            | Ca(ICC2/PI489777)SNP_26422 | 497  | T | C | 15  | 9   | Root  | --  |
|            | Ca(ICC2/PI489777)SNP_26423 | 650  | T | C | 9   | 3   | Root  | --  |
| CakTC27834 | Ca(ICC2/PI489777)SNP_26424 | 704  | T | C | 11  | 3   | --    | FHA |
|            | Ca(ICC2/PI489777)SNP_26425 | 822  | T | C | 19  | 3   | --    | FHA |
|            | Ca(ICC2/PI489777)SNP_26426 | 842  | C | G | 18  | 3   | --    | FHA |
|            | Ca(ICC2/PI489777)SNP_26427 | 929  | C | A | 17  | 3   | --    | FHA |
| CakTC43062 | Ca(ICC2/PI489777)SNP_26428 | 347  | G | A | 9   | 8   | --    | --  |
|            | Ca(ICC2/PI489777)SNP_26429 | 1036 | G | T | 12  | 4   | --    | --  |
|            | Ca(ICC2/PI489777)SNP_26430 | 1751 | C | T | 8   | 5   | --    | --  |
| CakTC42640 | Ca(ICC2/PI489777)SNP_26431 | 496  | T | C | 16  | 6   | --    | --  |
|            | Ca(ICC2/PI489777)SNP_26432 | 592  | A | C | 20  | 4   | --    | --  |
|            | Ca(ICC2/PI489777)SNP_26433 | 784  | A | T | 7   | 6   | --    | --  |
|            | Ca(ICC2/PI489777)SNP_26434 | 930  | A | C | 11  | 8   | --    | --  |
|            | Ca(ICC2/PI489777)SNP_26435 | 1045 | T | A | 10  | 8   | --    | --  |
|            | Ca(ICC2/PI489777)SNP_26436 | 1183 | A | G | 14  | 10  | --    | --  |
|            | Ca(ICC2/PI489777)SNP_26437 | 1317 | A | C | 8   | 5   | --    | --  |
|            | Ca(ICC2/PI489777)SNP_26438 | 1328 | C | G | 11  | 4   | --    | --  |
|            | Ca(ICC2/PI489777)SNP_26439 | 1399 | A | G | 8   | 7   | --    | --  |
|            | Ca(ICC2/PI489777)SNP_26440 | 1479 | G | C | 7   | 6   | --    | --  |
|            | Ca(ICC2/PI489777)SNP_26441 | 1513 | C | T | 6   | 7   | --    | --  |
|            | Ca(ICC2/PI489777)SNP_26442 | 1544 | C | G | 5   | 7   | --    | --  |
|            | Ca(ICC2/PI489777)SNP_26443 | 1553 | C | G | 5   | 7   | --    | --  |
|            | Ca(ICC2/PI489777)SNP_26444 | 1555 | G | T | 5   | 7   | --    | --  |
| CakTC41180 | Ca(ICC2/PI489777)SNP_26445 | 367  | G | A | 62  | 63  | --    | --  |
| CakTC11666 | Ca(ICC2/PI489777)SNP_26446 | 506  | T | C | 3   | 5   | --    | --  |
|            | Ca(ICC2/PI489777)SNP_26447 | 1043 | T | G | 4   | 9   | --    | --  |
|            | Ca(ICC2/PI489777)SNP_26448 | 1085 | A | T | 6   | 7   | --    | --  |
|            | Ca(ICC2/PI489777)SNP_26449 | 1463 | T | C | 4   | 4   | --    | --  |
| CakTC37985 | Ca(ICC2/PI489777)SNP_26450 | 392  | G | A | 7   | 7   | --    | --  |
|            | Ca(ICC2/PI489777)SNP_26451 | 1355 | C | G | 6   | 7   | --    | --  |
| CakTC30937 | Ca(ICC2/PI489777)SNP_26452 | 1408 | G | A | 3   | 4   | --    | --  |
| CakTC41602 | Ca(ICC2/PI489777)SNP_26453 | 73   | T | A | 6   | 8   | --    | --  |
|            | Ca(ICC2/PI489777)SNP_26454 | 75   | A | T | 5   | 8   | --    | --  |
|            | Ca(ICC2/PI489777)SNP_26455 | 89   | A | G | 5   | 11  | --    | --  |
|            | Ca(ICC2/PI489777)SNP_26456 | 114  | T | C | 15  | 13  | --    | --  |
|            | Ca(ICC2/PI489777)SNP_26457 | 671  | G | A | 114 | 110 | --    | --  |
|            | Ca(ICC2/PI489777)SNP_26458 | 675  | A | C | 108 | 119 | --    | --  |
| CakTC25812 | Ca(ICC2/PI489777)SNP_26459 | 203  | T | C | 15  | 3   | Shoot | --  |
|            | Ca(ICC2/PI489777)SNP_26460 | 1100 | C | A | 13  | 3   | Shoot | --  |
|            | Ca(ICC2/PI489777)SNP_26461 | 1270 | C | T | 21  | 6   | Shoot | --  |
| CakTC39211 | Ca(ICC2/PI489777)SNP_26462 | 525  | T | A | 19  | 4   | Root  | --  |
|            | Ca(ICC2/PI489777)SNP_26463 | 700  | A | G | 21  | 3   | Root  | --  |
|            | Ca(ICC2/PI489777)SNP_26464 | 924  | C | G | 16  | 3   | Root  | --  |
|            | Ca(ICC2/PI489777)SNP_26465 | 1260 | T | C | 18  | 3   | Root  | --  |
| CakTC27599 | Ca(ICC2/PI489777)SNP_26466 | 418  | A | G | 10  | 13  | --    | --  |
|            | Ca(ICC2/PI489777)SNP_26467 | 1058 | G | T | 4   | 3   | --    | --  |
|            | Ca(ICC2/PI489777)SNP_26468 | 1130 | T | C | 7   | 4   | --    | --  |
|            | Ca(ICC2/PI489777)SNP_26469 | 2165 | A | G | 22  | 11  | --    | --  |
|            | Ca(ICC2/PI489777)SNP_26470 | 2231 | T | C | 17  | 17  | --    | --  |
|            | Ca(ICC2/PI489777)SNP_26471 | 2618 | G | A | 13  | 7   | --    | --  |
|            | Ca(ICC2/PI489777)SNP_26472 | 2755 | A | G | 10  | 16  | --    | --  |
|            | Ca(ICC2/PI489777)SNP_26473 | 3202 | T | G | 4   | 3   | --    | --  |
| CakTC22742 | Ca(ICC2/PI489777)SNP_26474 | 864  | T | G | 5   | 3   | --    | --  |
|            | Ca(ICC2/PI489777)SNP_26475 | 895  | T | C | 4   | 3   | --    | --  |
| CakTC29557 | Ca(ICC2/PI489777)SNP_26476 | 1642 | C | T | 14  | 5   | --    | --  |
| CakTC34567 | Ca(ICC2/PI489777)SNP_26477 | 427  | T | C | 8   | 11  | --    | --  |
|            | Ca(ICC2/PI489777)SNP_26478 | 561  | A | G | 19  | 15  | --    | --  |
|            | Ca(ICC2/PI489777)SNP_26479 | 700  | C | T | 17  | 9   | --    | --  |
|            | Ca(ICC2/PI489777)SNP_26480 | 931  | C | T | 15  | 11  | --    | --  |
|            | Ca(ICC2/PI489777)SNP_26481 | 1242 | T | G | 8   | 20  | --    | --  |
|            | Ca(ICC2/PI489777)SNP_26482 | 1278 | C | A | 7   | 18  | --    | --  |
|            | Ca(ICC2/PI489777)SNP_26483 | 1655 | G | A | 13  | 8   | --    | --  |
|            | Ca(ICC2/PI489777)SNP_26484 | 1850 | T | C | 12  | 8   | --    | --  |
|            | Ca(ICC2/PI489777)SNP_26485 | 2161 | G | A | 9   | 4   | --    | --  |
| CakTC32588 | Ca(ICC2/PI489777)SNP_26486 | 204  | T | C | 4   | 5   | --    | --  |
| CakTC37562 | Ca(ICC2/PI489777)SNP_26487 | 599  | G | A | 12  | 12  | --    | --  |

|            |                            |      |   |   |    |    |           |    |
|------------|----------------------------|------|---|---|----|----|-----------|----|
|            | Ca(ICC2/PI489777)SNP_26488 | 825  | T | C | 17 | 19 | --        | -- |
|            | Ca(ICC2/PI489777)SNP_26489 | 969  | C | T | 15 | 16 | --        | -- |
| CakTC32556 | Ca(ICC2/PI489777)SNP_26490 | 644  | G | A | 16 | 4  | --        | -- |
|            | Ca(ICC2/PI489777)SNP_26491 | 1793 | G | A | 4  | 3  | --        | -- |
| CakTC39434 | Ca(ICC2/PI489777)SNP_26492 | 474  | A | G | 16 | 42 | --        | -- |
|            | Ca(ICC2/PI489777)SNP_26493 | 800  | T | C | 15 | 20 | --        | -- |
| CakTC30128 | Ca(ICC2/PI489777)SNP_26494 | 461  | G | C | 4  | 3  | --        | -- |
| CakTC32961 | Ca(ICC2/PI489777)SNP_26495 | 159  | A | G | 6  | 21 | --        | -- |
|            | Ca(ICC2/PI489777)SNP_26496 | 300  | T | C | 7  | 21 | --        | -- |
|            | Ca(ICC2/PI489777)SNP_26497 | 323  | T | C | 7  | 21 | --        | -- |
|            | Ca(ICC2/PI489777)SNP_26498 | 410  | C | T | 5  | 20 | --        | -- |
| CakTC38654 | Ca(ICC2/PI489777)SNP_26499 | 882  | T | C | 6  | 3  | --        | -- |
|            | Ca(ICC2/PI489777)SNP_26500 | 929  | G | T | 5  | 3  | --        | -- |
|            | Ca(ICC2/PI489777)SNP_26501 | 1256 | A | C | 4  | 4  | --        | -- |
| CakTC22759 | Ca(ICC2/PI489777)SNP_26502 | 342  | A | C | 3  | 4  | --        | -- |
| CakTC35046 | Ca(ICC2/PI489777)SNP_26503 | 830  | T | A | 4  | 6  | --        | -- |
|            | Ca(ICC2/PI489777)SNP_26504 | 1202 | A | T | 9  | 8  | --        | -- |
| CakTC39042 | Ca(ICC2/PI489777)SNP_26505 | 589  | T | G | 16 | 3  | --        | -- |
|            | Ca(ICC2/PI489777)SNP_26506 | 765  | G | A | 16 | 3  | --        | -- |
| CakTC40034 | Ca(ICC2/PI489777)SNP_26507 | 140  | G | C | 20 | 19 | --        | -- |
|            | Ca(ICC2/PI489777)SNP_26508 | 204  | T | C | 15 | 22 | --        | -- |
|            | Ca(ICC2/PI489777)SNP_26509 | 246  | A | G | 17 | 23 | --        | -- |
|            | Ca(ICC2/PI489777)SNP_26510 | 444  | T | C | 12 | 20 | --        | -- |
|            | Ca(ICC2/PI489777)SNP_26511 | 636  | T | G | 10 | 5  | --        | -- |
|            | Ca(ICC2/PI489777)SNP_26512 | 1213 | A | T | 7  | 4  | --        | -- |
| CakTC25636 | Ca(ICC2/PI489777)SNP_26513 | 1668 | A | G | 9  | 4  | --        | -- |
|            | Ca(ICC2/PI489777)SNP_26514 | 2104 | G | A | 6  | 4  | --        | -- |
|            | Ca(ICC2/PI489777)SNP_26515 | 2683 | A | G | 6  | 12 | --        | -- |
|            | Ca(ICC2/PI489777)SNP_26516 | 2748 | G | A | 9  | 10 | --        | -- |
|            | Ca(ICC2/PI489777)SNP_26517 | 2905 | T | G | 4  | 7  | --        | -- |
|            | Ca(ICC2/PI489777)SNP_26518 | 2936 | G | C | 5  | 4  | --        | -- |
|            | Ca(ICC2/PI489777)SNP_26519 | 3176 | A | G | 8  | 3  | --        | -- |
|            | Ca(ICC2/PI489777)SNP_26520 | 3196 | G | T | 8  | 3  | --        | -- |
|            | Ca(ICC2/PI489777)SNP_26521 | 3206 | T | C | 5  | 3  | --        | -- |
|            | Ca(ICC2/PI489777)SNP_26522 | 4212 | G | A | 63 | 34 | --        | -- |
|            | Ca(ICC2/PI489777)SNP_26523 | 4751 | G | T | 33 | 23 | --        | -- |
| CakTC16840 | Ca(ICC2/PI489777)SNP_26524 | 294  | A | G | 4  | 3  | --        | -- |
| CakTC41190 | Ca(ICC2/PI489777)SNP_26525 | 184  | G | A | 15 | 4  | --        | -- |
|            | Ca(ICC2/PI489777)SNP_26526 | 193  | C | G | 13 | 5  | --        | -- |
|            | Ca(ICC2/PI489777)SNP_26527 | 280  | G | C | 13 | 9  | --        | -- |
| CakTC30879 | Ca(ICC2/PI489777)SNP_26528 | 340  | A | G | 11 | 3  | --        | -- |
|            | Ca(ICC2/PI489777)SNP_26529 | 527  | C | G | 11 | 3  | --        | -- |
|            | Ca(ICC2/PI489777)SNP_26530 | 1175 | G | A | 13 | 4  | --        | -- |
|            | Ca(ICC2/PI489777)SNP_26531 | 1488 | C | T | 11 | 3  | --        | -- |
|            | Ca(ICC2/PI489777)SNP_26532 | 1722 | G | A | 7  | 4  | --        | -- |
| CakTC11388 | Ca(ICC2/PI489777)SNP_26533 | 169  | C | T | 69 | 47 | --        | -- |
|            | Ca(ICC2/PI489777)SNP_26534 | 277  | A | C | 66 | 57 | --        | -- |
|            | Ca(ICC2/PI489777)SNP_26535 | 436  | T | A | 66 | 50 | --        | -- |
|            | Ca(ICC2/PI489777)SNP_26536 | 1372 | C | T | 38 | 36 | --        | -- |
| CakTC41641 | Ca(ICC2/PI489777)SNP_26537 | 2064 | A | G | 9  | 7  | --        | -- |
|            | Ca(ICC2/PI489777)SNP_26538 | 2820 | A | G | 5  | 5  | --        | -- |
| CakTC26021 | Ca(ICC2/PI489777)SNP_26539 | 211  | C | G | 15 | 12 | --        | -- |
|            | Ca(ICC2/PI489777)SNP_26540 | 239  | G | A | 17 | 13 | --        | -- |
|            | Ca(ICC2/PI489777)SNP_26541 | 398  | G | T | 16 | 18 | --        | -- |
|            | Ca(ICC2/PI489777)SNP_26542 | 490  | A | G | 17 | 21 | --        | -- |
|            | Ca(ICC2/PI489777)SNP_26543 | 638  | A | G | 12 | 14 | --        | -- |
|            | Ca(ICC2/PI489777)SNP_26544 | 764  | T | G | 20 | 12 | --        | -- |
|            | Ca(ICC2/PI489777)SNP_26545 | 937  | A | T | 24 | 16 | --        | -- |
|            | Ca(ICC2/PI489777)SNP_26546 | 987  | T | C | 34 | 17 | --        | -- |
|            | Ca(ICC2/PI489777)SNP_26547 | 995  | T | C | 34 | 19 | --        | -- |
|            | Ca(ICC2/PI489777)SNP_26548 | 1063 | C | T | 33 | 22 | --        | -- |
|            | Ca(ICC2/PI489777)SNP_26549 | 1160 | G | A | 32 | 22 | --        | -- |
|            | Ca(ICC2/PI489777)SNP_26550 | 1238 | A | G | 22 | 17 | --        | -- |
|            | Ca(ICC2/PI489777)SNP_26551 | 1966 | G | A | 16 | 22 | --        | -- |
|            | Ca(ICC2/PI489777)SNP_26552 | 2125 | G | T | 13 | 10 | --        | -- |
| CakTC31418 | Ca(ICC2/PI489777)SNP_26553 | 320  | C | T | 15 | 4  | Young_pod | -- |
|            | Ca(ICC2/PI489777)SNP_26554 | 557  | T | G | 21 | 5  | Young_pod | -- |
|            | Ca(ICC2/PI489777)SNP_26555 | 630  | T | G | 21 | 5  | Young_pod | -- |
|            | Ca(ICC2/PI489777)SNP_26556 | 655  | T | C | 17 | 5  | Young_pod | -- |
|            | Ca(ICC2/PI489777)SNP_26557 | 730  | T | G | 14 | 5  | Young_pod | -- |
| CakTC39165 | Ca(ICC2/PI489777)SNP_26558 | 292  | G | A | 9  | 5  | --        | -- |
|            | Ca(ICC2/PI489777)SNP_26559 | 1282 | T | A | 7  | 8  | --        | -- |
|            | Ca(ICC2/PI489777)SNP_26560 | 1432 | C | T | 5  | 4  | --        | -- |
| CakTC27992 | Ca(ICC2/PI489777)SNP_26561 | 183  | A | G | 5  | 5  | --        | -- |

|            |                            |      |   |   |    |    |    |      |
|------------|----------------------------|------|---|---|----|----|----|------|
|            | Ca(ICC2/PI489777)SNP_26562 | 217  | C | G | 5  | 5  | -- | --   |
|            | Ca(ICC2/PI489777)SNP_26563 | 220  | G | A | 6  | 5  | -- | --   |
| CakTC26728 | Ca(ICC2/PI489777)SNP_26564 | 854  | C | T | 18 | 7  | -- | --   |
|            | Ca(ICC2/PI489777)SNP_26565 | 1478 | T | C | 8  | 3  | -- | --   |
| CakTC35530 | Ca(ICC2/PI489777)SNP_26566 | 2872 | T | C | 8  | 5  | -- | --   |
| CakTC17629 | Ca(ICC2/PI489777)SNP_26567 | 614  | T | C | 18 | 8  | -- | --   |
|            | Ca(ICC2/PI489777)SNP_26568 | 828  | A | G | 25 | 7  | -- | --   |
|            | Ca(ICC2/PI489777)SNP_26569 | 950  | C | T | 20 | 5  | -- | --   |
| CakTC42059 | Ca(ICC2/PI489777)SNP_26570 | 208  | A | G | 13 | 6  | -- | --   |
|            | Ca(ICC2/PI489777)SNP_26571 | 340  | G | T | 12 | 7  | -- | --   |
| CakTC39366 | Ca(ICC2/PI489777)SNP_26572 | 276  | T | C | 17 | 5  | -- | --   |
| CakTC31241 | Ca(ICC2/PI489777)SNP_26573 | 418  | C | A | 7  | 4  | -- | --   |
|            | Ca(ICC2/PI489777)SNP_26574 | 436  | A | C | 4  | 4  | -- | --   |
| CakTC29151 | Ca(ICC2/PI489777)SNP_26575 | 208  | G | C | 5  | 5  | -- | --   |
|            | Ca(ICC2/PI489777)SNP_26576 | 286  | G | A | 5  | 5  | -- | --   |
| CakTC39281 | Ca(ICC2/PI489777)SNP_26577 | 623  | G | C | 11 | 14 | -- | --   |
| CakTC24417 | Ca(ICC2/PI489777)SNP_26578 | 681  | C | G | 7  | 5  | -- | CCHC |
| CakTC25519 | Ca(ICC2/PI489777)SNP_26579 | 478  | A | T | 3  | 5  | -- | --   |
|            | Ca(ICC2/PI489777)SNP_26580 | 1007 | G | A | 3  | 3  | -- | --   |
| CakTC28489 | Ca(ICC2/PI489777)SNP_26581 | 1029 | G | A | 27 | 7  | -- | --   |
|            | Ca(ICC2/PI489777)SNP_26582 | 1248 | G | A | 27 | 6  | -- | --   |
| CakTC42685 | Ca(ICC2/PI489777)SNP_26583 | 245  | T | C | 10 | 9  | -- | --   |
|            | Ca(ICC2/PI489777)SNP_26584 | 818  | T | C | 6  | 8  | -- | --   |
|            | Ca(ICC2/PI489777)SNP_26585 | 888  | T | A | 6  | 8  | -- | --   |
| CakTC41626 | Ca(ICC2/PI489777)SNP_26586 | 93   | G | A | 10 | 9  | -- | --   |
|            | Ca(ICC2/PI489777)SNP_26587 | 229  | T | C | 12 | 13 | -- | --   |
|            | Ca(ICC2/PI489777)SNP_26588 | 315  | A | G | 13 | 13 | -- | --   |
|            | Ca(ICC2/PI489777)SNP_26589 | 1134 | A | C | 12 | 23 | -- | --   |
|            | Ca(ICC2/PI489777)SNP_26590 | 1185 | T | G | 12 | 25 | -- | --   |
|            | Ca(ICC2/PI489777)SNP_26591 | 1200 | C | T | 13 | 25 | -- | --   |
|            | Ca(ICC2/PI489777)SNP_26592 | 1257 | C | T | 17 | 22 | -- | --   |
|            | Ca(ICC2/PI489777)SNP_26593 | 1269 | T | C | 18 | 19 | -- | --   |
|            | Ca(ICC2/PI489777)SNP_26594 | 1362 | G | A | 19 | 15 | -- | --   |
|            | Ca(ICC2/PI489777)SNP_26595 | 1401 | T | C | 21 | 15 | -- | --   |
|            | Ca(ICC2/PI489777)SNP_26596 | 1815 | A | T | 5  | 16 | -- | --   |
|            | Ca(ICC2/PI489777)SNP_26597 | 1834 | A | G | 6  | 18 | -- | --   |
|            | Ca(ICC2/PI489777)SNP_26598 | 2071 | T | C | 5  | 14 | -- | --   |
|            | Ca(ICC2/PI489777)SNP_26599 | 2174 | G | T | 4  | 10 | -- | --   |
| CakTC35924 | Ca(ICC2/PI489777)SNP_26600 | 283  | G | A | 13 | 8  | -- | --   |
|            | Ca(ICC2/PI489777)SNP_26601 | 420  | T | C | 7  | 6  | -- | --   |
|            | Ca(ICC2/PI489777)SNP_26602 | 2237 | T | C | 5  | 5  | -- | --   |
| CakTC42857 | Ca(ICC2/PI489777)SNP_26603 | 676  | G | A | 7  | 9  | -- | ARID |
|            | Ca(ICC2/PI489777)SNP_26604 | 1387 | T | G | 5  | 6  | -- | ARID |
|            | Ca(ICC2/PI489777)SNP_26605 | 1604 | G | C | 3  | 5  | -- | ARID |
| CakTC23795 | Ca(ICC2/PI489777)SNP_26606 | 714  | T | A | 11 | 4  | -- | --   |
| CakTC28922 | Ca(ICC2/PI489777)SNP_26607 | 2224 | G | T | 15 | 7  | -- | FHA  |
| CakTC34402 | Ca(ICC2/PI489777)SNP_26608 | 292  | A | T | 10 | 6  | -- | --   |
| CakTC42522 | Ca(ICC2/PI489777)SNP_26609 | 276  | C | G | 8  | 6  | -- | --   |
|            | Ca(ICC2/PI489777)SNP_26610 | 553  | T | C | 6  | 5  | -- | --   |
| CakTC37744 | Ca(ICC2/PI489777)SNP_26611 | 731  | G | A | 13 | 11 | -- | --   |
|            | Ca(ICC2/PI489777)SNP_26612 | 930  | T | G | 11 | 6  | -- | --   |
| CakTC33923 | Ca(ICC2/PI489777)SNP_26613 | 174  | C | G | 17 | 7  | -- | --   |
|            | Ca(ICC2/PI489777)SNP_26614 | 254  | A | G | 19 | 11 | -- | --   |
|            | Ca(ICC2/PI489777)SNP_26615 | 470  | T | A | 21 | 13 | -- | --   |
|            | Ca(ICC2/PI489777)SNP_26616 | 643  | G | A | 10 | 4  | -- | --   |
| CakTC12546 | Ca(ICC2/PI489777)SNP_26617 | 787  | A | G | 9  | 7  | -- | --   |
|            | Ca(ICC2/PI489777)SNP_26618 | 3309 | A | C | 8  | 3  | -- | --   |
|            | Ca(ICC2/PI489777)SNP_26619 | 3512 | A | G | 3  | 3  | -- | --   |
|            | Ca(ICC2/PI489777)SNP_26620 | 3551 | C | T | 4  | 3  | -- | --   |
|            | Ca(ICC2/PI489777)SNP_26621 | 4356 | G | A | 4  | 3  | -- | --   |
|            | Ca(ICC2/PI489777)SNP_26622 | 4431 | A | G | 4  | 4  | -- | --   |
|            | Ca(ICC2/PI489777)SNP_26623 | 4551 | G | A | 4  | 6  | -- | --   |
| CakTC42234 | Ca(ICC2/PI489777)SNP_26624 | 71   | G | C | 10 | 5  | -- | --   |
|            | Ca(ICC2/PI489777)SNP_26625 | 694  | T | A | 88 | 53 | -- | --   |
|            | Ca(ICC2/PI489777)SNP_26626 | 700  | A | T | 87 | 54 | -- | --   |
|            | Ca(ICC2/PI489777)SNP_26627 | 729  | C | G | 85 | 49 | -- | --   |
| CakTC38495 | Ca(ICC2/PI489777)SNP_26628 | 12   | G | C | 5  | 3  | -- | --   |
| CakTC33451 | Ca(ICC2/PI489777)SNP_26629 | 377  | C | T | 12 | 11 | -- | --   |
|            | Ca(ICC2/PI489777)SNP_26630 | 538  | C | A | 11 | 13 | -- | --   |
| CakTC11587 | Ca(ICC2/PI489777)SNP_26631 | 675  | G | T | 12 | 8  | -- | --   |
|            | Ca(ICC2/PI489777)SNP_26632 | 777  | G | A | 5  | 3  | -- | --   |
| CakTC11411 | Ca(ICC2/PI489777)SNP_26633 | 204  | C | G | 8  | 8  | -- | --   |
|            | Ca(ICC2/PI489777)SNP_26634 | 987  | A | G | 17 | 7  | -- | --   |
|            | Ca(ICC2/PI489777)SNP_26635 | 2210 | C | T | 29 | 11 | -- | --   |



|            |                             |      |   |   |     |    |    |     |
|------------|-----------------------------|------|---|---|-----|----|----|-----|
| CakTC29956 | Ca(ICCV2/PI489777)SNP_26636 | 104  | C | T | 3   | 5  | -- | --  |
|            | Ca(ICCV2/PI489777)SNP_26637 | 240  | T | C | 3   | 7  | -- | --  |
|            | Ca(ICCV2/PI489777)SNP_26638 | 2295 | G | A | 11  | 5  | -- | --  |
|            | Ca(ICCV2/PI489777)SNP_26639 | 2403 | T | G | 15  | 7  | -- | --  |
|            | Ca(ICCV2/PI489777)SNP_26640 | 2505 | G | A | 17  | 9  | -- | --  |
|            | Ca(ICCV2/PI489777)SNP_26641 | 2818 | G | A | 16  | 5  | -- | --  |
| CakTC09646 | Ca(ICCV2/PI489777)SNP_26642 | 106  | C | G | 14  | 3  | -- | --  |
|            | Ca(ICCV2/PI489777)SNP_26643 | 120  | T | C | 16  | 3  | -- | --  |
|            | Ca(ICCV2/PI489777)SNP_26644 | 927  | A | C | 16  | 12 | -- | --  |
| CakTC29860 | Ca(ICCV2/PI489777)SNP_26645 | 265  | C | T | 14  | 6  | -- | --  |
|            | Ca(ICCV2/PI489777)SNP_26646 | 331  | C | A | 17  | 9  | -- | --  |
|            | Ca(ICCV2/PI489777)SNP_26647 | 1828 | C | T | 12  | 10 | -- | --  |
| CakTC23583 | Ca(ICCV2/PI489777)SNP_26648 | 358  | A | G | 4   | 5  | -- | --  |
|            | Ca(ICCV2/PI489777)SNP_26649 | 436  | A | G | 4   | 5  | -- | --  |
|            | Ca(ICCV2/PI489777)SNP_26650 | 475  | C | G | 4   | 3  | -- | --  |
|            | Ca(ICCV2/PI489777)SNP_26651 | 479  | G | T | 4   | 3  | -- | --  |
| CakTC28883 | Ca(ICCV2/PI489777)SNP_26652 | 1227 | C | T | 4   | 4  | -- | --  |
|            | Ca(ICCV2/PI489777)SNP_26653 | 1656 | A | T | 3   | 3  | -- | --  |
| CakTC39225 | Ca(ICCV2/PI489777)SNP_26654 | 456  | A | G | 16  | 7  | -- | --  |
|            | Ca(ICCV2/PI489777)SNP_26655 | 1624 | G | A | 4   | 6  | -- | --  |
| CakTC39774 | Ca(ICCV2/PI489777)SNP_26656 | 267  | A | C | 19  | 3  | -- | --  |
|            | Ca(ICCV2/PI489777)SNP_26657 | 339  | G | A | 17  | 6  | -- | --  |
| CakTC28474 | Ca(ICCV2/PI489777)SNP_26658 | 453  | A | C | 9   | 10 | -- | --  |
|            | Ca(ICCV2/PI489777)SNP_26659 | 524  | A | C | 6   | 8  | -- | --  |
|            | Ca(ICCV2/PI489777)SNP_26660 | 661  | C | T | 8   | 6  | -- | --  |
| CakTC41174 | Ca(ICCV2/PI489777)SNP_26661 | 413  | C | T | 10  | 5  | -- | --  |
| CakTC22248 | Ca(ICCV2/PI489777)SNP_26662 | 731  | A | G | 109 | 60 | -- | --  |
|            | Ca(ICCV2/PI489777)SNP_26663 | 1514 | G | T | 55  | 53 | -- | --  |
| CakTC24410 | Ca(ICCV2/PI489777)SNP_26664 | 988  | A | C | 34  | 21 | -- | --  |
|            | Ca(ICCV2/PI489777)SNP_26665 | 1060 | G | A | 29  | 14 | -- | --  |
|            | Ca(ICCV2/PI489777)SNP_26666 | 1433 | A | G | 20  | 16 | -- | --  |
| CakTC26628 | Ca(ICCV2/PI489777)SNP_26667 | 48   | T | C | 43  | 16 | -- | --  |
|            | Ca(ICCV2/PI489777)SNP_26668 | 101  | T | A | 49  | 20 | -- | --  |
|            | Ca(ICCV2/PI489777)SNP_26669 | 437  | C | A | 130 | 61 | -- | --  |
|            | Ca(ICCV2/PI489777)SNP_26670 | 470  | C | A | 127 | 59 | -- | --  |
| CakTC37803 | Ca(ICCV2/PI489777)SNP_26671 | 1167 | G | A | 87  | 71 | -- | --  |
| CakTC43366 | Ca(ICCV2/PI489777)SNP_26672 | 138  | T | C | 3   | 3  | -- | --  |
| CakTC32513 | Ca(ICCV2/PI489777)SNP_26673 | 700  | C | T | 9   | 9  | -- | --  |
|            | Ca(ICCV2/PI489777)SNP_26674 | 1048 | A | G | 14  | 9  | -- | --  |
|            | Ca(ICCV2/PI489777)SNP_26675 | 1438 | G | A | 25  | 20 | -- | --  |
|            | Ca(ICCV2/PI489777)SNP_26676 | 1945 | A | G | 9   | 4  | -- | --  |
| CakTC43152 | Ca(ICCV2/PI489777)SNP_26677 | 77   | T | C | 8   | 6  | -- | --  |
| CakTC42828 | Ca(ICCV2/PI489777)SNP_26678 | 164  | A | T | 11  | 10 | -- | --  |
|            | Ca(ICCV2/PI489777)SNP_26679 | 173  | G | A | 11  | 11 | -- | --  |
|            | Ca(ICCV2/PI489777)SNP_26680 | 311  | A | G | 14  | 13 | -- | --  |
|            | Ca(ICCV2/PI489777)SNP_26681 | 636  | A | T | 12  | 16 | -- | --  |
|            | Ca(ICCV2/PI489777)SNP_26682 | 661  | C | T | 10  | 16 | -- | --  |
|            | Ca(ICCV2/PI489777)SNP_26683 | 773  | G | A | 3   | 9  | -- | --  |
| CakTC16343 | Ca(ICCV2/PI489777)SNP_26684 | 1259 | A | C | 5   | 4  | -- | --  |
|            | Ca(ICCV2/PI489777)SNP_26685 | 1261 | A | C | 6   | 4  | -- | --  |
| CakTC07843 | Ca(ICCV2/PI489777)SNP_26686 | 281  | C | T | 5   | 3  | -- | --  |
| CakTC37330 | Ca(ICCV2/PI489777)SNP_26687 | 890  | G | C | 9   | 13 | -- | --  |
| CakTC24038 | Ca(ICCV2/PI489777)SNP_26688 | 597  | A | T | 34  | 6  | -- | SBP |
|            | Ca(ICCV2/PI489777)SNP_26689 | 598  | A | T | 33  | 6  | -- | SBP |
|            | Ca(ICCV2/PI489777)SNP_26690 | 1006 | T | C | 41  | 12 | -- | SBP |
|            | Ca(ICCV2/PI489777)SNP_26691 | 1276 | G | A | 42  | 19 | -- | SBP |
|            | Ca(ICCV2/PI489777)SNP_26692 | 1520 | A | G | 35  | 22 | -- | SBP |
|            | Ca(ICCV2/PI489777)SNP_26693 | 2514 | G | A | 71  | 29 | -- | SBP |
|            | Ca(ICCV2/PI489777)SNP_26694 | 2704 | G | A | 80  | 18 | -- | SBP |
|            | Ca(ICCV2/PI489777)SNP_26695 | 3490 | A | G | 41  | 19 | -- | SBP |
|            | Ca(ICCV2/PI489777)SNP_26696 | 3509 | G | T | 41  | 21 | -- | SBP |
|            | Ca(ICCV2/PI489777)SNP_26697 | 3811 | T | C | 11  | 13 | -- | SBP |
|            | Ca(ICCV2/PI489777)SNP_26698 | 3875 | C | A | 5   | 10 | -- | SBP |
|            | Ca(ICCV2/PI489777)SNP_26699 | 3929 | C | A | 3   | 8  | -- | SBP |
| CakTC13870 | Ca(ICCV2/PI489777)SNP_26700 | 475  | C | T | 6   | 41 | -- | --  |
|            | Ca(ICCV2/PI489777)SNP_26701 | 481  | G | A | 5   | 41 | -- | --  |
|            | Ca(ICCV2/PI489777)SNP_26702 | 489  | G | T | 5   | 41 | -- | --  |
|            | Ca(ICCV2/PI489777)SNP_26703 | 514  | A | G | 5   | 41 | -- | --  |
|            | Ca(ICCV2/PI489777)SNP_26704 | 524  | C | T | 5   | 38 | -- | --  |
|            | Ca(ICCV2/PI489777)SNP_26705 | 537  | T | G | 3   | 41 | -- | --  |
|            | Ca(ICCV2/PI489777)SNP_26706 | 544  | G | A | 4   | 39 | -- | --  |
| CakTC24263 | Ca(ICCV2/PI489777)SNP_26707 | 77   | C | G | 6   | 3  | -- | --  |
|            | Ca(ICCV2/PI489777)SNP_26708 | 309  | A | C | 57  | 25 | -- | --  |
|            | Ca(ICCV2/PI489777)SNP_26709 | 354  | T | G | 53  | 22 | -- | --  |

|            |                             |      |   |   |     |    |       |     |
|------------|-----------------------------|------|---|---|-----|----|-------|-----|
|            | Ca(ICCV2/PI489777)SNP_26710 | 549  | C | A | 70  | 61 | --    | --  |
| CakTC25064 | Ca(ICCV2/PI489777)SNP_26711 | 302  | T | C | 14  | 3  | Shoot | --  |
|            | Ca(ICCV2/PI489777)SNP_26712 | 553  | T | C | 16  | 3  | Shoot | --  |
|            | Ca(ICCV2/PI489777)SNP_26713 | 692  | C | A | 14  | 4  | Shoot | --  |
| CakTC28484 | Ca(ICCV2/PI489777)SNP_26714 | 240  | T | C | 5   | 16 | --    | --  |
|            | Ca(ICCV2/PI489777)SNP_26715 | 250  | T | C | 6   | 19 | --    | --  |
|            | Ca(ICCV2/PI489777)SNP_26716 | 1965 | C | T | 17  | 11 | --    | --  |
| CakTC10316 | Ca(ICCV2/PI489777)SNP_26717 | 467  | A | T | 5   | 4  | --    | --  |
|            | Ca(ICCV2/PI489777)SNP_26718 | 711  | C | A | 6   | 4  | --    | --  |
|            | Ca(ICCV2/PI489777)SNP_26719 | 717  | A | G | 6   | 4  | --    | --  |
| CakTC39971 | Ca(ICCV2/PI489777)SNP_26720 | 212  | T | G | 6   | 7  | --    | --  |
|            | Ca(ICCV2/PI489777)SNP_26721 | 590  | C | T | 9   | 6  | --    | --  |
| CakTC41187 | Ca(ICCV2/PI489777)SNP_26722 | 1762 | C | T | 6   | 10 | --    | --  |
| CakTC32094 | Ca(ICCV2/PI489777)SNP_26723 | 231  | G | A | 15  | 6  | --    | --  |
|            | Ca(ICCV2/PI489777)SNP_26724 | 288  | C | A | 16  | 7  | --    | --  |
|            | Ca(ICCV2/PI489777)SNP_26725 | 967  | C | T | 13  | 3  | --    | --  |
|            | Ca(ICCV2/PI489777)SNP_26726 | 1437 | T | C | 10  | 10 | --    | --  |
| CakTC42946 | Ca(ICCV2/PI489777)SNP_26727 | 580  | A | G | 3   | 3  | --    | --  |
| CakTC26589 | Ca(ICCV2/PI489777)SNP_26728 | 244  | A | T | 5   | 5  | --    | --  |
|            | Ca(ICCV2/PI489777)SNP_26729 | 1090 | T | C | 45  | 29 | --    | --  |
| CakTC33288 | Ca(ICCV2/PI489777)SNP_26730 | 2537 | T | C | 12  | 8  | --    | TPR |
|            | Ca(ICCV2/PI489777)SNP_26731 | 2724 | A | C | 4   | 4  | --    | TPR |
| CakTC40329 | Ca(ICCV2/PI489777)SNP_26732 | 397  | T | A | 5   | 9  | --    | --  |
|            | Ca(ICCV2/PI489777)SNP_26733 | 558  | A | T | 5   | 8  | --    | --  |
|            | Ca(ICCV2/PI489777)SNP_26734 | 592  | G | A | 8   | 6  | --    | --  |
|            | Ca(ICCV2/PI489777)SNP_26735 | 1393 | G | A | 8   | 6  | --    | --  |
|            | Ca(ICCV2/PI489777)SNP_26736 | 1515 | T | G | 3   | 4  | --    | --  |
|            | Ca(ICCV2/PI489777)SNP_26737 | 1533 | T | C | 6   | 5  | --    | --  |
| CakTC27239 | Ca(ICCV2/PI489777)SNP_26738 | 790  | C | T | 31  | 16 | --    | --  |
|            | Ca(ICCV2/PI489777)SNP_26739 | 961  | C | A | 20  | 5  | --    | --  |
| CakTC37461 | Ca(ICCV2/PI489777)SNP_26740 | 28   | C | A | 3   | 5  | --    | --  |
|            | Ca(ICCV2/PI489777)SNP_26741 | 53   | G | A | 11  | 10 | --    | --  |
|            | Ca(ICCV2/PI489777)SNP_26742 | 107  | T | C | 29  | 32 | --    | --  |
|            | Ca(ICCV2/PI489777)SNP_26743 | 300  | T | A | 37  | 33 | --    | --  |
|            | Ca(ICCV2/PI489777)SNP_26744 | 307  | T | C | 36  | 34 | --    | --  |
|            | Ca(ICCV2/PI489777)SNP_26745 | 512  | T | C | 35  | 19 | --    | --  |
|            | Ca(ICCV2/PI489777)SNP_26746 | 915  | C | T | 10  | 8  | --    | --  |
| CakTC43059 | Ca(ICCV2/PI489777)SNP_26747 | 189  | T | C | 10  | 5  | --    | --  |
| CakTC34619 | Ca(ICCV2/PI489777)SNP_26748 | 183  | C | T | 6   | 14 | --    | NAC |
|            | Ca(ICCV2/PI489777)SNP_26749 | 218  | T | A | 8   | 14 | --    | NAC |
|            | Ca(ICCV2/PI489777)SNP_26750 | 1060 | G | A | 9   | 8  | --    | NAC |
|            | Ca(ICCV2/PI489777)SNP_26751 | 1304 | C | G | 14  | 6  | --    | NAC |
|            | Ca(ICCV2/PI489777)SNP_26752 | 1361 | C | T | 15  | 3  | --    | NAC |
|            | Ca(ICCV2/PI489777)SNP_26753 | 1387 | T | G | 17  | 7  | --    | NAC |
|            | Ca(ICCV2/PI489777)SNP_26754 | 1510 | A | G | 21  | 10 | --    | NAC |
|            | Ca(ICCV2/PI489777)SNP_26755 | 1525 | C | T | 21  | 8  | --    | NAC |
|            | Ca(ICCV2/PI489777)SNP_26756 | 1587 | C | A | 18  | 6  | --    | NAC |
|            | Ca(ICCV2/PI489777)SNP_26757 | 1647 | T | C | 13  | 7  | --    | NAC |
|            | Ca(ICCV2/PI489777)SNP_26758 | 1681 | C | A | 14  | 6  | --    | NAC |
|            | Ca(ICCV2/PI489777)SNP_26759 | 1705 | T | C | 12  | 5  | --    | NAC |
|            | Ca(ICCV2/PI489777)SNP_26760 | 1762 | G | A | 8   | 9  | --    | NAC |
|            | Ca(ICCV2/PI489777)SNP_26761 | 1773 | T | C | 9   | 7  | --    | NAC |
|            | Ca(ICCV2/PI489777)SNP_26762 | 1889 | G | A | 6   | 6  | --    | NAC |
| CakTC42423 | Ca(ICCV2/PI489777)SNP_26763 | 245  | T | C | 13  | 48 | --    | --  |
|            | Ca(ICCV2/PI489777)SNP_26764 | 1279 | G | A | 78  | 66 | --    | --  |
|            | Ca(ICCV2/PI489777)SNP_26765 | 1379 | T | C | 76  | 57 | --    | --  |
|            | Ca(ICCV2/PI489777)SNP_26766 | 1757 | T | C | 30  | 32 | --    | --  |
| CakTC30766 | Ca(ICCV2/PI489777)SNP_26767 | 1022 | C | A | 17  | 3  | --    | --  |
|            | Ca(ICCV2/PI489777)SNP_26768 | 1026 | C | T | 15  | 3  | --    | --  |
|            | Ca(ICCV2/PI489777)SNP_26769 | 1497 | A | G | 6   | 3  | --    | --  |
|            | Ca(ICCV2/PI489777)SNP_26770 | 1946 | C | G | 14  | 7  | --    | --  |
|            | Ca(ICCV2/PI489777)SNP_26771 | 2790 | A | G | 3   | 4  | --    | --  |
|            | Ca(ICCV2/PI489777)SNP_26772 | 3018 | G | A | 4   | 6  | --    | --  |
|            | Ca(ICCV2/PI489777)SNP_26773 | 3264 | C | A | 11  | 4  | --    | --  |
|            | Ca(ICCV2/PI489777)SNP_26774 | 3901 | T | C | 3   | 7  | --    | --  |
| CakTC22602 | Ca(ICCV2/PI489777)SNP_26775 | 509  | T | G | 610 | 11 | --    | --  |
|            | Ca(ICCV2/PI489777)SNP_26776 | 526  | G | A | 584 | 10 | --    | --  |
| CakTC40913 | Ca(ICCV2/PI489777)SNP_26777 | 439  | T | A | 7   | 4  | --    | --  |
| CakTC41098 | Ca(ICCV2/PI489777)SNP_26778 | 107  | T | A | 4   | 5  | --    | --  |
|            | Ca(ICCV2/PI489777)SNP_26779 | 654  | G | C | 4   | 4  | --    | --  |
| CakTC38207 | Ca(ICCV2/PI489777)SNP_26780 | 302  | G | A | 21  | 19 | --    | --  |
|            | Ca(ICCV2/PI489777)SNP_26781 | 611  | C | G | 22  | 13 | --    | --  |
|            | Ca(ICCV2/PI489777)SNP_26782 | 875  | G | A | 22  | 12 | --    | --  |
|            | Ca(ICCV2/PI489777)SNP_26783 | 1031 | T | A | 10  | 8  | --    | --  |

|            |                            |      |   |   |     |    |        |      |
|------------|----------------------------|------|---|---|-----|----|--------|------|
| CakTC40040 | Ca(ICC2/PI489777)SNP_26784 | 230  | C | T | 23  | 9  | --     | --   |
|            | Ca(ICC2/PI489777)SNP_26785 | 336  | C | T | 37  | 12 | --     | --   |
|            | Ca(ICC2/PI489777)SNP_26786 | 1133 | A | G | 23  | 19 | --     | --   |
|            | Ca(ICC2/PI489777)SNP_26787 | 1313 | T | A | 18  | 18 | --     | --   |
| CakTC29900 | Ca(ICC2/PI489777)SNP_26788 | 306  | C | T | 3   | 3  | Flower | bud  |
|            | Ca(ICC2/PI489777)SNP_26789 | 408  | C | G | 5   | 4  | Flower | bud  |
|            | Ca(ICC2/PI489777)SNP_26790 | 1200 | A | G | 10  | 8  | Flower | bud  |
|            | Ca(ICC2/PI489777)SNP_26791 | 2980 | C | T | 8   | 10 | Flower | bud  |
|            | Ca(ICC2/PI489777)SNP_26792 | 3346 | A | G | 12  | 4  | Flower | bud  |
|            | Ca(ICC2/PI489777)SNP_26793 | 3347 | A | G | 12  | 4  | Flower | bud  |
|            | Ca(ICC2/PI489777)SNP_26794 | 3378 | C | T | 10  | 4  | Flower | bud  |
|            | Ca(ICC2/PI489777)SNP_26795 | 3701 | T | C | 13  | 3  | Flower | bud  |
| CakTC25276 | Ca(ICC2/PI489777)SNP_26796 | 927  | G | A | 3   | 3  | --     | --   |
| CakTC08345 | Ca(ICC2/PI489777)SNP_26797 | 655  | C | A | 10  | 5  | --     | --   |
|            | Ca(ICC2/PI489777)SNP_26798 | 718  | C | T | 9   | 6  | --     | --   |
|            | Ca(ICC2/PI489777)SNP_26799 | 1037 | T | C | 3   | 3  | --     | --   |
|            | Ca(ICC2/PI489777)SNP_26800 | 1072 | G | C | 3   | 3  | --     | --   |
| CakTC40546 | Ca(ICC2/PI489777)SNP_26801 | 40   | A | G | 19  | 18 | --     | --   |
|            | Ca(ICC2/PI489777)SNP_26802 | 484  | G | A | 34  | 27 | --     | --   |
|            | Ca(ICC2/PI489777)SNP_26803 | 508  | C | T | 33  | 25 | --     | --   |
|            | Ca(ICC2/PI489777)SNP_26804 | 657  | T | A | 5   | 4  | --     | --   |
| CakTC43015 | Ca(ICC2/PI489777)SNP_26805 | 138  | T | C | 10  | 10 | --     | --   |
|            | Ca(ICC2/PI489777)SNP_26806 | 587  | C | A | 100 | 89 | --     | --   |
| CakTC42983 | Ca(ICC2/PI489777)SNP_26807 | 950  | C | T | 20  | 5  | --     | --   |
|            | Ca(ICC2/PI489777)SNP_26808 | 1031 | T | C | 21  | 6  | --     | --   |
|            | Ca(ICC2/PI489777)SNP_26809 | 1151 | C | T | 14  | 5  | --     | --   |
|            | Ca(ICC2/PI489777)SNP_26810 | 1158 | C | T | 13  | 4  | --     | --   |
|            | Ca(ICC2/PI489777)SNP_26811 | 1274 | C | T | 8   | 5  | --     | --   |
|            | Ca(ICC2/PI489777)SNP_26812 | 1334 | C | A | 18  | 7  | --     | --   |
|            | Ca(ICC2/PI489777)SNP_26813 | 1466 | A | G | 30  | 8  | --     | --   |
|            | Ca(ICC2/PI489777)SNP_26814 | 1505 | C | T | 33  | 8  | --     | --   |
|            | Ca(ICC2/PI489777)SNP_26815 | 1634 | C | T | 21  | 6  | --     | --   |
|            | Ca(ICC2/PI489777)SNP_26816 | 1798 | T | C | 5   | 3  | --     | --   |
| CakTC34725 | Ca(ICC2/PI489777)SNP_26817 | 133  | G | T | 13  | 4  | --     | --   |
| CakTC36364 | Ca(ICC2/PI489777)SNP_26818 | 399  | G | A | 3   | 4  | --     | --   |
| CakTC26364 | Ca(ICC2/PI489777)SNP_26819 | 37   | G | T | 23  | 12 | --     | --   |
|            | Ca(ICC2/PI489777)SNP_26820 | 829  | G | A | 24  | 12 | --     | --   |
| CakTC29702 | Ca(ICC2/PI489777)SNP_26821 | 588  | C | T | 41  | 31 | --     | --   |
|            | Ca(ICC2/PI489777)SNP_26822 | 630  | C | T | 41  | 25 | --     | --   |
| CakTC43243 | Ca(ICC2/PI489777)SNP_26823 | 272  | G | C | 13  | 3  | --     | --   |
|            | Ca(ICC2/PI489777)SNP_26824 | 479  | C | A | 9   | 4  | --     | --   |
| CakTC04300 | Ca(ICC2/PI489777)SNP_26825 | 130  | C | T | 14  | 6  | --     | --   |
|            | Ca(ICC2/PI489777)SNP_26826 | 133  | T | A | 14  | 6  | --     | --   |
|            | Ca(ICC2/PI489777)SNP_26827 | 161  | T | C | 17  | 6  | --     | --   |
|            | Ca(ICC2/PI489777)SNP_26828 | 184  | C | T | 26  | 7  | --     | --   |
|            | Ca(ICC2/PI489777)SNP_26829 | 194  | T | C | 21  | 5  | --     | --   |
|            | Ca(ICC2/PI489777)SNP_26830 | 207  | A | G | 27  | 8  | --     | --   |
|            | Ca(ICC2/PI489777)SNP_26831 | 220  | G | C | 28  | 8  | --     | --   |
|            | Ca(ICC2/PI489777)SNP_26832 | 263  | C | T | 31  | 8  | --     | --   |
| CakTC22324 | Ca(ICC2/PI489777)SNP_26833 | 330  | A | T | 6   | 5  | --     | --   |
|            | Ca(ICC2/PI489777)SNP_26834 | 342  | C | T | 6   | 5  | --     | --   |
|            | Ca(ICC2/PI489777)SNP_26835 | 354  | C | T | 6   | 5  | --     | --   |
|            | Ca(ICC2/PI489777)SNP_26836 | 378  | C | G | 6   | 5  | --     | --   |
|            | Ca(ICC2/PI489777)SNP_26837 | 741  | C | T | 54  | 15 | --     | --   |
| CakTC08995 | Ca(ICC2/PI489777)SNP_26838 | 345  | C | T | 35  | 42 | --     | --   |
|            | Ca(ICC2/PI489777)SNP_26839 | 414  | T | C | 48  | 36 | --     | --   |
|            | Ca(ICC2/PI489777)SNP_26840 | 532  | C | A | 55  | 38 | --     | --   |
|            | Ca(ICC2/PI489777)SNP_26841 | 533  | A | C | 54  | 40 | --     | --   |
|            | Ca(ICC2/PI489777)SNP_26842 | 914  | G | C | 17  | 6  | --     | --   |
| CakTC28600 | Ca(ICC2/PI489777)SNP_26843 | 350  | C | T | 7   | 7  | --     | --   |
| CakTC30779 | Ca(ICC2/PI489777)SNP_26844 | 1613 | T | C | 6   | 3  | --     | VARL |
|            | Ca(ICC2/PI489777)SNP_26845 | 3530 | C | T | 12  | 8  | --     | VARL |
| CakTC32165 | Ca(ICC2/PI489777)SNP_26846 | 144  | T | A | 3   | 3  | --     | --   |
|            | Ca(ICC2/PI489777)SNP_26847 | 151  | A | G | 3   | 3  | --     | --   |
|            | Ca(ICC2/PI489777)SNP_26848 | 173  | T | C | 3   | 3  | --     | --   |
|            | Ca(ICC2/PI489777)SNP_26849 | 186  | A | G | 3   | 3  | --     | --   |
|            | Ca(ICC2/PI489777)SNP_26850 | 187  | G | A | 3   | 3  | --     | --   |
|            | Ca(ICC2/PI489777)SNP_26851 | 204  | A | G | 3   | 3  | --     | --   |
|            | Ca(ICC2/PI489777)SNP_26852 | 208  | A | G | 4   | 3  | --     | --   |
|            | Ca(ICC2/PI489777)SNP_26853 | 218  | A | G | 4   | 3  | --     | --   |
|            | Ca(ICC2/PI489777)SNP_26854 | 282  | G | A | 4   | 3  | --     | --   |
|            | Ca(ICC2/PI489777)SNP_26855 | 287  | A | G | 4   | 3  | --     | --   |
|            | Ca(ICC2/PI489777)SNP_26856 | 307  | C | T | 4   | 3  | --     | --   |
|            | Ca(ICC2/PI489777)SNP_26857 | 308  | T | C | 4   | 3  | --     | --   |

|            |                            |      |   |   |    |    |    |      |
|------------|----------------------------|------|---|---|----|----|----|------|
|            | Ca(ICC2/PI489777)SNP_26858 | 320  | C | T | 3  | 3  | -- | --   |
|            | Ca(ICC2/PI489777)SNP_26859 | 322  | T | A | 4  | 3  | -- | --   |
|            | Ca(ICC2/PI489777)SNP_26860 | 379  | C | T | 4  | 5  | -- | --   |
|            | Ca(ICC2/PI489777)SNP_26861 | 387  | G | T | 3  | 5  | -- | --   |
|            | Ca(ICC2/PI489777)SNP_26862 | 445  | C | T | 4  | 3  | -- | --   |
| CakTC37763 | Ca(ICC2/PI489777)SNP_26863 | 262  | A | G | 8  | 4  | -- | --   |
|            | Ca(ICC2/PI489777)SNP_26864 | 263  | G | T | 8  | 5  | -- | --   |
|            | Ca(ICC2/PI489777)SNP_26865 | 634  | G | A | 3  | 13 | -- | --   |
|            | Ca(ICC2/PI489777)SNP_26866 | 1616 | C | G | 3  | 7  | -- | --   |
|            | Ca(ICC2/PI489777)SNP_26867 | 1631 | A | G | 3  | 7  | -- | --   |
| CakTC26547 | Ca(ICC2/PI489777)SNP_26868 | 403  | T | C | 9  | 3  | -- | --   |
|            | Ca(ICC2/PI489777)SNP_26869 | 676  | T | C | 7  | 5  | -- | --   |
|            | Ca(ICC2/PI489777)SNP_26870 | 678  | A | G | 7  | 5  | -- | --   |
|            | Ca(ICC2/PI489777)SNP_26871 | 717  | A | T | 7  | 5  | -- | --   |
|            | Ca(ICC2/PI489777)SNP_26872 | 720  | T | C | 7  | 5  | -- | --   |
|            | Ca(ICC2/PI489777)SNP_26873 | 733  | C | T | 7  | 5  | -- | --   |
|            | Ca(ICC2/PI489777)SNP_26874 | 792  | A | G | 5  | 5  | -- | --   |
|            | Ca(ICC2/PI489777)SNP_26875 | 801  | A | T | 7  | 5  | -- | --   |
|            | Ca(ICC2/PI489777)SNP_26876 | 809  | T | C | 8  | 5  | -- | --   |
|            | Ca(ICC2/PI489777)SNP_26877 | 885  | C | T | 9  | 4  | -- | --   |
|            | Ca(ICC2/PI489777)SNP_26878 | 894  | G | C | 9  | 4  | -- | --   |
| CakTC41299 | Ca(ICC2/PI489777)SNP_26879 | 1426 | G | A | 14 | 12 | -- | --   |
|            | Ca(ICC2/PI489777)SNP_26880 | 2103 | A | G | 10 | 14 | -- | --   |
| CakTC30863 | Ca(ICC2/PI489777)SNP_26881 | 364  | C | T | 13 | 5  | -- | --   |
|            | Ca(ICC2/PI489777)SNP_26882 | 613  | C | G | 5  | 3  | -- | --   |
|            | Ca(ICC2/PI489777)SNP_26883 | 721  | A | G | 8  | 8  | -- | --   |
|            | Ca(ICC2/PI489777)SNP_26884 | 787  | T | C | 8  | 8  | -- | --   |
| CakTC32494 | Ca(ICC2/PI489777)SNP_26885 | 1538 | T | C | 6  | 3  | -- | C3H  |
| CakTC08720 | Ca(ICC2/PI489777)SNP_26886 | 1949 | C | G | 4  | 5  | -- | --   |
|            | Ca(ICC2/PI489777)SNP_26887 | 2002 | T | A | 3  | 4  | -- | --   |
|            | Ca(ICC2/PI489777)SNP_26888 | 2040 | T | G | 3  | 4  | -- | --   |
| CakTC27695 | Ca(ICC2/PI489777)SNP_26889 | 742  | T | C | 31 | 18 | -- | --   |
| CakTC40197 | Ca(ICC2/PI489777)SNP_26890 | 476  | C | T | 23 | 20 | -- | --   |
|            | Ca(ICC2/PI489777)SNP_26891 | 726  | G | A | 32 | 18 | -- | --   |
|            | Ca(ICC2/PI489777)SNP_26892 | 1233 | A | G | 12 | 5  | -- | --   |
| CakTC29665 | Ca(ICC2/PI489777)SNP_26893 | 106  | A | G | 4  | 4  | -- | --   |
|            | Ca(ICC2/PI489777)SNP_26894 | 348  | C | A | 8  | 6  | -- | --   |
|            | Ca(ICC2/PI489777)SNP_26895 | 791  | A | T | 10 | 4  | -- | --   |
|            | Ca(ICC2/PI489777)SNP_26896 | 878  | A | T | 12 | 6  | -- | --   |
|            | Ca(ICC2/PI489777)SNP_26897 | 1492 | C | A | 13 | 8  | -- | --   |
| CakTC32727 | Ca(ICC2/PI489777)SNP_26898 | 115  | C | A | 6  | 7  | -- | --   |
| CakTC31186 | Ca(ICC2/PI489777)SNP_26899 | 106  | G | A | 38 | 20 | -- | --   |
| CakTC32601 | Ca(ICC2/PI489777)SNP_26900 | 68   | A | T | 54 | 20 | -- | --   |
|            | Ca(ICC2/PI489777)SNP_26901 | 450  | A | T | 11 | 10 | -- | --   |
| CakTC33787 | Ca(ICC2/PI489777)SNP_26902 | 377  | A | C | 4  | 8  | -- | --   |
|            | Ca(ICC2/PI489777)SNP_26903 | 381  | G | T | 4  | 8  | -- | --   |
|            | Ca(ICC2/PI489777)SNP_26904 | 479  | T | C | 5  | 7  | -- | --   |
| CakTC41796 | Ca(ICC2/PI489777)SNP_26905 | 1251 | T | C | 20 | 5  | -- | --   |
|            | Ca(ICC2/PI489777)SNP_26906 | 1725 | A | G | 9  | 4  | -- | --   |
|            | Ca(ICC2/PI489777)SNP_26907 | 1827 | G | A | 15 | 3  | -- | --   |
|            | Ca(ICC2/PI489777)SNP_26908 | 2069 | G | A | 4  | 3  | -- | --   |
|            | Ca(ICC2/PI489777)SNP_26909 | 2072 | C | G | 6  | 3  | -- | --   |
|            | Ca(ICC2/PI489777)SNP_26910 | 2086 | C | T | 6  | 3  | -- | --   |
| CakTC28695 | Ca(ICC2/PI489777)SNP_26911 | 2720 | A | G | 6  | 3  | -- | --   |
| CakTC39322 | Ca(ICC2/PI489777)SNP_26912 | 623  | T | C | 10 | 5  | -- | Tify |
| CakTC39108 | Ca(ICC2/PI489777)SNP_26913 | 326  | C | T | 27 | 20 | -- | --   |
|            | Ca(ICC2/PI489777)SNP_26914 | 1118 | C | T | 19 | 9  | -- | --   |
|            | Ca(ICC2/PI489777)SNP_26915 | 1239 | A | G | 23 | 10 | -- | --   |
| CakTC39101 | Ca(ICC2/PI489777)SNP_26916 | 450  | G | A | 14 | 9  | -- | --   |
|            | Ca(ICC2/PI489777)SNP_26917 | 867  | T | C | 29 | 24 | -- | --   |
|            | Ca(ICC2/PI489777)SNP_26918 | 1005 | G | A | 24 | 27 | -- | --   |
|            | Ca(ICC2/PI489777)SNP_26919 | 1008 | G | A | 27 | 24 | -- | --   |
|            | Ca(ICC2/PI489777)SNP_26920 | 1083 | T | C | 26 | 22 | -- | --   |
|            | Ca(ICC2/PI489777)SNP_26921 | 1167 | G | A | 24 | 22 | -- | --   |
|            | Ca(ICC2/PI489777)SNP_26922 | 1201 | A | G | 21 | 21 | -- | --   |
| CakTC26721 | Ca(ICC2/PI489777)SNP_26923 | 1408 | C | T | 12 | 5  | -- | --   |
|            | Ca(ICC2/PI489777)SNP_26924 | 2856 | C | T | 13 | 3  | -- | --   |
| CakTC39953 | Ca(ICC2/PI489777)SNP_26925 | 368  | C | G | 9  | 4  | -- | --   |
|            | Ca(ICC2/PI489777)SNP_26926 | 579  | G | A | 11 | 4  | -- | --   |
| CakTC28059 | Ca(ICC2/PI489777)SNP_26927 | 637  | G | A | 19 | 24 | -- | --   |
|            | Ca(ICC2/PI489777)SNP_26928 | 1751 | G | A | 13 | 8  | -- | --   |
|            | Ca(ICC2/PI489777)SNP_26929 | 1967 | G | A | 6  | 6  | -- | --   |
| CakTC36426 | Ca(ICC2/PI489777)SNP_26930 | 197  | A | G | 15 | 4  | -- | --   |
|            | Ca(ICC2/PI489777)SNP_26931 | 203  | T | C | 17 | 4  | -- | --   |

|            |                            |      |   |   |    |    |       |    |
|------------|----------------------------|------|---|---|----|----|-------|----|
|            | Ca(ICC2/PI489777)SNP_26932 | 209  | G | T | 18 | 4  | --    | -- |
| CakTC39941 | Ca(ICC2/PI489777)SNP_26933 | 275  | G | A | 9  | 4  | --    | -- |
|            | Ca(ICC2/PI489777)SNP_26934 | 536  | C | T | 6  | 4  | --    | -- |
|            | Ca(ICC2/PI489777)SNP_26935 | 578  | G | T | 6  | 3  | --    | -- |
|            | Ca(ICC2/PI489777)SNP_26936 | 584  | G | A | 6  | 4  | --    | -- |
| CakTC17801 | Ca(ICC2/PI489777)SNP_26937 | 311  | T | C | 3  | 3  | --    | -- |
| CakTC09296 | Ca(ICC2/PI489777)SNP_26938 | 797  | T | C | 3  | 3  | --    | -- |
| CakTC28796 | Ca(ICC2/PI489777)SNP_26939 | 669  | A | G | 7  | 10 | --    | -- |
|            | Ca(ICC2/PI489777)SNP_26940 | 758  | A | G | 8  | 7  | --    | -- |
|            | Ca(ICC2/PI489777)SNP_26941 | 859  | T | C | 9  | 6  | --    | -- |
|            | Ca(ICC2/PI489777)SNP_26942 | 1156 | G | A | 6  | 3  | --    | -- |
| CakTC40208 | Ca(ICC2/PI489777)SNP_26943 | 190  | T | A | 8  | 3  | --    | -- |
|            | Ca(ICC2/PI489777)SNP_26944 | 542  | T | C | 11 | 6  | --    | -- |
|            | Ca(ICC2/PI489777)SNP_26945 | 545  | G | C | 11 | 8  | --    | -- |
|            | Ca(ICC2/PI489777)SNP_26946 | 605  | T | C | 9  | 8  | --    | -- |
| CakTC34305 | Ca(ICC2/PI489777)SNP_26947 | 545  | A | C | 9  | 7  | --    | -- |
| CakTC38519 | Ca(ICC2/PI489777)SNP_26948 | 991  | T | G | 10 | 6  | --    | -- |
|            | Ca(ICC2/PI489777)SNP_26949 | 1092 | T | C | 16 | 7  | --    | -- |
|            | Ca(ICC2/PI489777)SNP_26950 | 1596 | G | C | 11 | 4  | --    | -- |
| CakTC29971 | Ca(ICC2/PI489777)SNP_26951 | 573  | G | T | 9  | 7  | Root  | -- |
|            | Ca(ICC2/PI489777)SNP_26952 | 793  | G | A | 12 | 4  | Root  | -- |
|            | Ca(ICC2/PI489777)SNP_26953 | 922  | C | T | 8  | 3  | Root  | -- |
|            | Ca(ICC2/PI489777)SNP_26954 | 972  | C | T | 7  | 3  | Root  | -- |
|            | Ca(ICC2/PI489777)SNP_26955 | 1438 | C | G | 6  | 6  | Root  | -- |
|            | Ca(ICC2/PI489777)SNP_26956 | 1718 | C | T | 7  | 6  | Root  | -- |
|            | Ca(ICC2/PI489777)SNP_26957 | 1720 | T | C | 7  | 5  | Root  | -- |
|            | Ca(ICC2/PI489777)SNP_26958 | 1842 | G | A | 9  | 3  | Root  | -- |
|            | Ca(ICC2/PI489777)SNP_26959 | 3520 | G | A | 3  | 3  | Root  | -- |
|            | Ca(ICC2/PI489777)SNP_26960 | 3625 | G | A | 9  | 4  | Root  | -- |
|            | Ca(ICC2/PI489777)SNP_26961 | 4639 | T | C | 5  | 6  | Root  | -- |
| CakTC22859 | Ca(ICC2/PI489777)SNP_26962 | 228  | A | G | 3  | 5  | --    | -- |
|            | Ca(ICC2/PI489777)SNP_26963 | 342  | C | A | 4  | 5  | --    | -- |
|            | Ca(ICC2/PI489777)SNP_26964 | 377  | G | C | 4  | 5  | --    | -- |
| CakTC39704 | Ca(ICC2/PI489777)SNP_26965 | 211  | G | C | 36 | 19 | --    | -- |
|            | Ca(ICC2/PI489777)SNP_26966 | 308  | A | T | 36 | 24 | --    | -- |
| CakTC34702 | Ca(ICC2/PI489777)SNP_26967 | 1160 | G | A | 31 | 9  | --    | -- |
|            | Ca(ICC2/PI489777)SNP_26968 | 1229 | A | T | 33 | 12 | --    | -- |
|            | Ca(ICC2/PI489777)SNP_26969 | 2747 | C | T | 7  | 6  | --    | -- |
|            | Ca(ICC2/PI489777)SNP_26970 | 2896 | C | T | 12 | 7  | --    | -- |
|            | Ca(ICC2/PI489777)SNP_26971 | 3139 | G | A | 17 | 7  | --    | -- |
|            | Ca(ICC2/PI489777)SNP_26972 | 3170 | T | G | 13 | 7  | --    | -- |
|            | Ca(ICC2/PI489777)SNP_26973 | 3397 | T | G | 9  | 7  | --    | -- |
| CakTC10006 | Ca(ICC2/PI489777)SNP_26974 | 274  | G | A | 18 | 10 | --    | -- |
|            | Ca(ICC2/PI489777)SNP_26975 | 380  | G | A | 11 | 9  | --    | -- |
| CakTC33380 | Ca(ICC2/PI489777)SNP_26976 | 220  | C | T | 7  | 4  | --    | -- |
|            | Ca(ICC2/PI489777)SNP_26977 | 236  | G | A | 7  | 4  | --    | -- |
|            | Ca(ICC2/PI489777)SNP_26978 | 1825 | G | A | 16 | 5  | --    | -- |
|            | Ca(ICC2/PI489777)SNP_26979 | 1908 | C | A | 18 | 5  | --    | -- |
| CakTC42590 | Ca(ICC2/PI489777)SNP_26980 | 388  | C | T | 39 | 14 | --    | -- |
|            | Ca(ICC2/PI489777)SNP_26981 | 728  | G | A | 26 | 11 | --    | -- |
|            | Ca(ICC2/PI489777)SNP_26982 | 889  | G | A | 25 | 4  | --    | -- |
|            | Ca(ICC2/PI489777)SNP_26983 | 971  | C | G | 23 | 5  | --    | -- |
|            | Ca(ICC2/PI489777)SNP_26984 | 1062 | T | G | 10 | 4  | --    | -- |
| CakTC24448 | Ca(ICC2/PI489777)SNP_26985 | 103  | C | T | 27 | 18 | --    | -- |
|            | Ca(ICC2/PI489777)SNP_26986 | 133  | C | T | 26 | 18 | --    | -- |
| CakTC32681 | Ca(ICC2/PI489777)SNP_26987 | 473  | T | C | 11 | 9  | Shoot | -- |
| CakTC37193 | Ca(ICC2/PI489777)SNP_26988 | 408  | G | A | 78 | 12 | --    | -- |
|            | Ca(ICC2/PI489777)SNP_26989 | 634  | C | T | 60 | 11 | --    | -- |
| CakTC30195 | Ca(ICC2/PI489777)SNP_26990 | 608  | A | T | 6  | 3  | Shoot | -- |
| CakTC42838 | Ca(ICC2/PI489777)SNP_26991 | 517  | T | C | 14 | 10 | --    | -- |
| CakTC38032 | Ca(ICC2/PI489777)SNP_26992 | 435  | G | A | 12 | 4  | --    | -- |
| CakTC13051 | Ca(ICC2/PI489777)SNP_26993 | 308  | T | C | 14 | 14 | --    | -- |
|            | Ca(ICC2/PI489777)SNP_26994 | 453  | C | T | 18 | 20 | --    | -- |
|            | Ca(ICC2/PI489777)SNP_26995 | 474  | A | G | 20 | 21 | --    | -- |
|            | Ca(ICC2/PI489777)SNP_26996 | 1245 | T | C | 16 | 6  | --    | -- |
|            | Ca(ICC2/PI489777)SNP_26997 | 1787 | A | G | 13 | 12 | --    | -- |
|            | Ca(ICC2/PI489777)SNP_26998 | 2315 | C | T | 40 | 26 | --    | -- |
|            | Ca(ICC2/PI489777)SNP_26999 | 2558 | T | C | 33 | 16 | --    | -- |
|            | Ca(ICC2/PI489777)SNP_27000 | 2579 | G | A | 34 | 14 | --    | -- |
|            | Ca(ICC2/PI489777)SNP_27001 | 2724 | A | G | 22 | 11 | --    | -- |
| CakTC41036 | Ca(ICC2/PI489777)SNP_27002 | 1319 | C | A | 8  | 3  | --    | -- |
|            | Ca(ICC2/PI489777)SNP_27003 | 1328 | G | A | 8  | 4  | --    | -- |
| CakTC10815 | Ca(ICC2/PI489777)SNP_27004 | 311  | G | A | 4  | 4  | --    | -- |
|            | Ca(ICC2/PI489777)SNP_27005 | 805  | A | G | 24 | 4  | --    | -- |

|            |                            |      |   |   |     |     |      |     |
|------------|----------------------------|------|---|---|-----|-----|------|-----|
|            | Ca(ICC2/PI489777)SNP_27006 | 1279 | C | T | 10  | 4   | --   | --  |
| CakTC38090 | Ca(ICC2/PI489777)SNP_27007 | 729  | G | A | 22  | 15  | --   | --  |
| CakTC22961 | Ca(ICC2/PI489777)SNP_27008 | 72   | A | G | 13  | 9   | --   | --  |
| CakTC39999 | Ca(ICC2/PI489777)SNP_27009 | 787  | T | G | 5   | 4   | --   | --  |
| CakTC34132 | Ca(ICC2/PI489777)SNP_27010 | 222  | T | A | 19  | 3   | --   | --  |
|            | Ca(ICC2/PI489777)SNP_27011 | 231  | G | A | 19  | 3   | --   | --  |
|            | Ca(ICC2/PI489777)SNP_27012 | 437  | G | A | 21  | 4   | --   | --  |
|            | Ca(ICC2/PI489777)SNP_27013 | 529  | G | C | 16  | 3   | --   | --  |
|            | Ca(ICC2/PI489777)SNP_27014 | 697  | G | A | 18  | 3   | --   | --  |
|            | Ca(ICC2/PI489777)SNP_27015 | 705  | A | G | 17  | 3   | --   | --  |
|            | Ca(ICC2/PI489777)SNP_27016 | 1094 | G | C | 29  | 9   | --   | --  |
|            | Ca(ICC2/PI489777)SNP_27017 | 1110 | G | C | 41  | 9   | --   | --  |
|            | Ca(ICC2/PI489777)SNP_27018 | 1149 | C | T | 44  | 9   | --   | --  |
|            | Ca(ICC2/PI489777)SNP_27019 | 1271 | G | T | 55  | 10  | --   | --  |
|            | Ca(ICC2/PI489777)SNP_27020 | 1356 | A | G | 59  | 10  | --   | --  |
|            | Ca(ICC2/PI489777)SNP_27021 | 1422 | A | G | 59  | 8   | --   | --  |
|            | Ca(ICC2/PI489777)SNP_27022 | 1431 | C | T | 60  | 8   | --   | --  |
| CakTC28572 | Ca(ICC2/PI489777)SNP_27023 | 650  | G | A | 7   | 6   | Root | --  |
|            | Ca(ICC2/PI489777)SNP_27024 | 752  | C | G | 9   | 5   | Root | --  |
|            | Ca(ICC2/PI489777)SNP_27025 | 1145 | G | A | 5   | 3   | Root | --  |
| CakTC32391 | Ca(ICC2/PI489777)SNP_27026 | 77   | C | A | 3   | 3   | --   | --  |
| CakTC37696 | Ca(ICC2/PI489777)SNP_27027 | 286  | C | T | 8   | 6   | --   | --  |
|            | Ca(ICC2/PI489777)SNP_27028 | 442  | A | G | 7   | 9   | --   | --  |
|            | Ca(ICC2/PI489777)SNP_27029 | 704  | G | T | 7   | 6   | --   | --  |
|            | Ca(ICC2/PI489777)SNP_27030 | 1121 | A | G | 10  | 3   | --   | --  |
| CakTC24365 | Ca(ICC2/PI489777)SNP_27031 | 877  | G | A | 7   | 4   | --   | --  |
| CakTC31229 | Ca(ICC2/PI489777)SNP_27032 | 183  | A | G | 12  | 10  | --   | --  |
|            | Ca(ICC2/PI489777)SNP_27033 | 456  | C | A | 5   | 9   | --   | --  |
|            | Ca(ICC2/PI489777)SNP_27034 | 477  | G | C | 5   | 8   | --   | --  |
|            | Ca(ICC2/PI489777)SNP_27035 | 681  | A | T | 6   | 14  | --   | --  |
|            | Ca(ICC2/PI489777)SNP_27036 | 978  | G | A | 14  | 19  | --   | --  |
|            | Ca(ICC2/PI489777)SNP_27037 | 984  | C | G | 15  | 20  | --   | --  |
|            | Ca(ICC2/PI489777)SNP_27038 | 1002 | T | C | 15  | 17  | --   | --  |
| CakTC33145 | Ca(ICC2/PI489777)SNP_27039 | 242  | A | G | 21  | 18  | --   | --  |
|            | Ca(ICC2/PI489777)SNP_27040 | 284  | C | T | 23  | 20  | --   | --  |
|            | Ca(ICC2/PI489777)SNP_27041 | 422  | T | C | 24  | 17  | --   | --  |
|            | Ca(ICC2/PI489777)SNP_27042 | 626  | G | A | 21  | 16  | --   | --  |
|            | Ca(ICC2/PI489777)SNP_27043 | 724  | A | T | 21  | 11  | --   | --  |
|            | Ca(ICC2/PI489777)SNP_27044 | 2322 | A | G | 10  | 5   | --   | --  |
| CakTC40739 | Ca(ICC2/PI489777)SNP_27045 | 356  | T | C | 35  | 20  | --   | --  |
|            | Ca(ICC2/PI489777)SNP_27046 | 397  | A | G | 34  | 17  | --   | --  |
|            | Ca(ICC2/PI489777)SNP_27047 | 406  | C | T | 32  | 19  | --   | --  |
|            | Ca(ICC2/PI489777)SNP_27048 | 499  | T | G | 25  | 15  | --   | --  |
|            | Ca(ICC2/PI489777)SNP_27049 | 526  | G | A | 30  | 15  | --   | --  |
|            | Ca(ICC2/PI489777)SNP_27050 | 1051 | T | C | 28  | 31  | --   | --  |
|            | Ca(ICC2/PI489777)SNP_27051 | 1117 | T | C | 22  | 28  | --   | --  |
|            | Ca(ICC2/PI489777)SNP_27052 | 1342 | C | T | 36  | 29  | --   | --  |
|            | Ca(ICC2/PI489777)SNP_27053 | 1507 | C | T | 25  | 24  | --   | --  |
|            | Ca(ICC2/PI489777)SNP_27054 | 1555 | C | A | 17  | 25  | --   | --  |
|            | Ca(ICC2/PI489777)SNP_27055 | 1591 | C | G | 16  | 25  | --   | --  |
|            | Ca(ICC2/PI489777)SNP_27056 | 1610 | C | T | 16  | 21  | --   | --  |
|            | Ca(ICC2/PI489777)SNP_27057 | 1705 | T | C | 9   | 25  | --   | --  |
|            | Ca(ICC2/PI489777)SNP_27058 | 1802 | T | C | 3   | 11  | --   | --  |
| CakTC31605 | Ca(ICC2/PI489777)SNP_27059 | 368  | C | T | 15  | 5   | --   | TCP |
|            | Ca(ICC2/PI489777)SNP_27060 | 461  | C | T | 19  | 5   | --   | TCP |
|            | Ca(ICC2/PI489777)SNP_27061 | 660  | T | C | 12  | 4   | --   | TCP |
| CakTC43043 | Ca(ICC2/PI489777)SNP_27062 | 340  | A | G | 8   | 4   | --   | --  |
|            | Ca(ICC2/PI489777)SNP_27063 | 344  | G | C | 8   | 5   | --   | --  |
|            | Ca(ICC2/PI489777)SNP_27064 | 697  | G | A | 15  | 7   | --   | --  |
|            | Ca(ICC2/PI489777)SNP_27065 | 1758 | G | C | 3   | 5   | --   | --  |
|            | Ca(ICC2/PI489777)SNP_27066 | 1782 | A | G | 3   | 9   | --   | --  |
|            | Ca(ICC2/PI489777)SNP_27067 | 1824 | G | T | 3   | 8   | --   | --  |
|            | Ca(ICC2/PI489777)SNP_27068 | 1848 | C | G | 3   | 7   | --   | --  |
|            | Ca(ICC2/PI489777)SNP_27069 | 1850 | G | C | 3   | 7   | --   | --  |
| CakTC23967 | Ca(ICC2/PI489777)SNP_27070 | 231  | T | C | 25  | 6   | --   | --  |
| CakTC22988 | Ca(ICC2/PI489777)SNP_27071 | 701  | A | T | 134 | 154 | --   | --  |
| CakTC29269 | Ca(ICC2/PI489777)SNP_27072 | 1531 | T | C | 5   | 3   | --   | --  |
|            | Ca(ICC2/PI489777)SNP_27073 | 1544 | C | G | 6   | 3   | --   | --  |
|            | Ca(ICC2/PI489777)SNP_27074 | 1555 | A | G | 4   | 3   | --   | --  |
| CakTC12147 | Ca(ICC2/PI489777)SNP_27075 | 424  | A | G | 3   | 3   | --   | --  |
| CakTC06122 | Ca(ICC2/PI489777)SNP_27076 | 68   | G | C | 13  | 9   | --   | --  |
| CakTC40535 | Ca(ICC2/PI489777)SNP_27077 | 1110 | G | A | 14  | 4   | --   | --  |
|            | Ca(ICC2/PI489777)SNP_27078 | 1806 | T | C | 7   | 9   | --   | --  |
| CakTC10032 | Ca(ICC2/PI489777)SNP_27079 | 1402 | G | A | 19  | 8   | --   | --  |

|            |                            |      |   |   |     |    |        |             |
|------------|----------------------------|------|---|---|-----|----|--------|-------------|
|            | Ca(ICC2/PI489777)SNP_27080 | 1474 | A | G | 18  | 8  | --     | --          |
|            | Ca(ICC2/PI489777)SNP_27081 | 1735 | C | T | 10  | 4  | --     | --          |
| CakTC43341 | Ca(ICC2/PI489777)SNP_27082 | 480  | A | G | 13  | 6  | --     | --          |
|            | Ca(ICC2/PI489777)SNP_27083 | 578  | T | C | 16  | 5  | --     | --          |
| CakTC33750 | Ca(ICC2/PI489777)SNP_27084 | 138  | C | A | 10  | 4  | --     | --          |
|            | Ca(ICC2/PI489777)SNP_27085 | 462  | T | C | 39  | 27 | --     | --          |
| CakTC32088 | Ca(ICC2/PI489777)SNP_27086 | 1455 | C | T | 4   | 5  | --     | --          |
| CakTC25669 | Ca(ICC2/PI489777)SNP_27087 | 265  | A | C | 36  | 8  | --     | --          |
|            | Ca(ICC2/PI489777)SNP_27088 | 267  | A | C | 36  | 9  | --     | --          |
| CakTC30133 | Ca(ICC2/PI489777)SNP_27089 | 266  | C | A | 3   | 9  | --     | --          |
|            | Ca(ICC2/PI489777)SNP_27090 | 320  | A | G | 4   | 8  | --     | --          |
| CakTC39764 | Ca(ICC2/PI489777)SNP_27091 | 935  | T | C | 4   | 5  | --     | --          |
|            | Ca(ICC2/PI489777)SNP_27092 | 1048 | C | G | 3   | 4  | --     | --          |
| CakTC39194 | Ca(ICC2/PI489777)SNP_27093 | 280  | G | A | 6   | 5  | --     | --          |
|            | Ca(ICC2/PI489777)SNP_27094 | 586  | T | C | 6   | 3  | --     | --          |
| CakTC27148 | Ca(ICC2/PI489777)SNP_27095 | 265  | G | C | 138 | 31 | --     | MYB-related |
|            | Ca(ICC2/PI489777)SNP_27096 | 1261 | A | G | 151 | 54 | --     | MYB-related |
| CakTC40246 | Ca(ICC2/PI489777)SNP_27097 | 103  | G | A | 5   | 6  | --     | --          |
|            | Ca(ICC2/PI489777)SNP_27098 | 314  | C | T | 12  | 21 | --     | --          |
|            | Ca(ICC2/PI489777)SNP_27099 | 464  | T | A | 16  | 17 | --     | --          |
|            | Ca(ICC2/PI489777)SNP_27100 | 728  | A | G | 13  | 13 | --     | --          |
|            | Ca(ICC2/PI489777)SNP_27101 | 1066 | G | A | 18  | 14 | --     | --          |
|            | Ca(ICC2/PI489777)SNP_27102 | 1125 | T | G | 21  | 9  | --     | --          |
|            | Ca(ICC2/PI489777)SNP_27103 | 1200 | G | T | 18  | 8  | --     | --          |
| CakTC39015 | Ca(ICC2/PI489777)SNP_27104 | 437  | A | G | 20  | 8  | --     | --          |
|            | Ca(ICC2/PI489777)SNP_27105 | 791  | T | A | 6   | 3  | --     | --          |
| CakTC40093 | Ca(ICC2/PI489777)SNP_27106 | 878  | C | T | 22  | 4  | --     | BBR/BPC     |
| CakTC24835 | Ca(ICC2/PI489777)SNP_27107 | 407  | G | A | 3   | 4  | Flower | bud         |
|            | Ca(ICC2/PI489777)SNP_27108 | 490  | C | A | 7   | 6  | Flower | bud         |
|            | Ca(ICC2/PI489777)SNP_27109 | 1880 | G | A | 14  | 5  | Flower | bud         |
|            | Ca(ICC2/PI489777)SNP_27110 | 1882 | G | A | 14  | 5  | Flower | bud         |
| CakTC42070 | Ca(ICC2/PI489777)SNP_27111 | 1530 | G | T | 7   | 3  | --     | --          |
| CakTC39556 | Ca(ICC2/PI489777)SNP_27112 | 745  | T | C | 8   | 11 | --     | --          |
|            | Ca(ICC2/PI489777)SNP_27113 | 943  | G | A | 7   | 13 | --     | --          |
|            | Ca(ICC2/PI489777)SNP_27114 | 1069 | A | G | 8   | 13 | --     | --          |
|            | Ca(ICC2/PI489777)SNP_27115 | 1109 | A | G | 7   | 11 | --     | --          |
| CakTC23773 | Ca(ICC2/PI489777)SNP_27116 | 1507 | A | G | 62  | 33 | --     | C3H         |
| CakTC26621 | Ca(ICC2/PI489777)SNP_27117 | 320  | A | C | 8   | 5  | --     | --          |
|            | Ca(ICC2/PI489777)SNP_27118 | 337  | C | A | 9   | 5  | --     | --          |
|            | Ca(ICC2/PI489777)SNP_27119 | 721  | A | G | 8   | 4  | --     | --          |
|            | Ca(ICC2/PI489777)SNP_27120 | 771  | G | A | 10  | 5  | --     | --          |
|            | Ca(ICC2/PI489777)SNP_27121 | 925  | C | T | 8   | 4  | --     | --          |
|            | Ca(ICC2/PI489777)SNP_27122 | 979  | G | A | 9   | 5  | --     | --          |
|            | Ca(ICC2/PI489777)SNP_27123 | 1015 | G | C | 8   | 5  | --     | --          |
| CakTC28028 | Ca(ICC2/PI489777)SNP_27124 | 116  | G | C | 26  | 17 | --     | --          |
|            | Ca(ICC2/PI489777)SNP_27125 | 950  | G | A | 49  | 16 | --     | --          |
|            | Ca(ICC2/PI489777)SNP_27126 | 2465 | A | G | 26  | 9  | --     | --          |
| CakTC35722 | Ca(ICC2/PI489777)SNP_27127 | 87   | A | G | 5   | 5  | Mature | Leaf        |
|            | Ca(ICC2/PI489777)SNP_27128 | 181  | A | T | 7   | 5  | Mature | Leaf        |
|            | Ca(ICC2/PI489777)SNP_27129 | 247  | A | C | 8   | 7  | Mature | Leaf        |
|            | Ca(ICC2/PI489777)SNP_27130 | 1932 | T | C | 9   | 3  | Mature | Leaf        |
|            | Ca(ICC2/PI489777)SNP_27131 | 2398 | A | G | 9   | 5  | Mature | Leaf        |
|            | Ca(ICC2/PI489777)SNP_27132 | 3037 | G | A | 3   | 7  | Mature | Leaf        |
|            | Ca(ICC2/PI489777)SNP_27133 | 3040 | A | G | 3   | 8  | Mature | Leaf        |
|            | Ca(ICC2/PI489777)SNP_27134 | 3622 | C | G | 4   | 3  | Mature | Leaf        |
|            | Ca(ICC2/PI489777)SNP_27135 | 3834 | C | T | 3   | 3  | Mature | Leaf        |
|            | Ca(ICC2/PI489777)SNP_27136 | 3909 | C | T | 5   | 3  | Mature | Leaf        |
| CakTC38891 | Ca(ICC2/PI489777)SNP_27137 | 495  | T | C | 22  | 18 | --     | --          |
|            | Ca(ICC2/PI489777)SNP_27138 | 843  | C | T | 15  | 18 | --     | --          |
| CakTC30523 | Ca(ICC2/PI489777)SNP_27139 | 753  | A | G | 28  | 3  | --     | --          |
|            | Ca(ICC2/PI489777)SNP_27140 | 1350 | T | A | 6   | 3  | --     | --          |
|            | Ca(ICC2/PI489777)SNP_27141 | 1896 | C | T | 6   | 4  | --     | --          |
|            | Ca(ICC2/PI489777)SNP_27142 | 2107 | C | A | 4   | 6  | --     | --          |
|            | Ca(ICC2/PI489777)SNP_27143 | 2794 | C | A | 7   | 3  | --     | --          |
| CakTC35858 | Ca(ICC2/PI489777)SNP_27144 | 725  | C | A | 11  | 3  | --     | --          |
|            | Ca(ICC2/PI489777)SNP_27145 | 1721 | G | A | 8   | 4  | --     | --          |
|            | Ca(ICC2/PI489777)SNP_27146 | 1993 | G | A | 6   | 4  | --     | --          |
|            | Ca(ICC2/PI489777)SNP_27147 | 2414 | T | A | 12  | 4  | --     | --          |
| CakTC38641 | Ca(ICC2/PI489777)SNP_27148 | 232  | A | G | 8   | 3  | --     | --          |
|            | Ca(ICC2/PI489777)SNP_27149 | 827  | A | G | 3   | 3  | --     | --          |
|            | Ca(ICC2/PI489777)SNP_27150 | 828  | A | G | 3   | 3  | --     | --          |
| CakTC09653 | Ca(ICC2/PI489777)SNP_27151 | 2380 | G | A | 16  | 9  | --     | --          |
| CakTC40725 | Ca(ICC2/PI489777)SNP_27152 | 1641 | G | A | 8   | 11 | --     | --          |
| CakTC40004 | Ca(ICC2/PI489777)SNP_27153 | 627  | T | C | 5   | 10 | --     | HB          |

|            |                            |      |   |   |    |    |      |    |
|------------|----------------------------|------|---|---|----|----|------|----|
|            | Ca(ICC2/PI489777)SNP_27154 | 742  | A | C | 4  | 34 | --   | HB |
|            | Ca(ICC2/PI489777)SNP_27155 | 825  | G | A | 3  | 14 | --   | HB |
|            | Ca(ICC2/PI489777)SNP_27156 | 856  | T | C | 4  | 10 | --   | HB |
| CakTC38636 | Ca(ICC2/PI489777)SNP_27157 | 497  | C | G | 9  | 4  | --   | -- |
| CakTC33897 | Ca(ICC2/PI489777)SNP_27158 | 157  | C | G | 26 | 12 | Root | -- |
|            | Ca(ICC2/PI489777)SNP_27159 | 159  | T | A | 26 | 13 | Root | -- |
|            | Ca(ICC2/PI489777)SNP_27160 | 685  | A | T | 3  | 10 | Root | -- |
|            | Ca(ICC2/PI489777)SNP_27161 | 725  | A | C | 3  | 10 | Root | -- |
|            | Ca(ICC2/PI489777)SNP_27162 | 770  | G | A | 3  | 6  | Root | -- |
|            | Ca(ICC2/PI489777)SNP_27163 | 802  | A | T | 3  | 5  | Root | -- |
|            | Ca(ICC2/PI489777)SNP_27164 | 804  | G | C | 3  | 7  | Root | -- |
| CakTC39126 | Ca(ICC2/PI489777)SNP_27165 | 515  | T | C | 6  | 5  | --   | -- |
| CakTC42199 | Ca(ICC2/PI489777)SNP_27166 | 510  | A | G | 3  | 7  | --   | -- |
|            | Ca(ICC2/PI489777)SNP_27167 | 1152 | A | G | 15 | 16 | --   | -- |
|            | Ca(ICC2/PI489777)SNP_27168 | 1245 | G | C | 17 | 15 | --   | -- |
|            | Ca(ICC2/PI489777)SNP_27169 | 1402 | A | G | 10 | 14 | --   | -- |
|            | Ca(ICC2/PI489777)SNP_27170 | 1404 | C | T | 11 | 14 | --   | -- |
|            | Ca(ICC2/PI489777)SNP_27171 | 1473 | G | A | 7  | 14 | --   | -- |
| CakTC38903 | Ca(ICC2/PI489777)SNP_27172 | 441  | C | T | 10 | 10 | --   | -- |
|            | Ca(ICC2/PI489777)SNP_27173 | 649  | A | G | 8  | 7  | --   | -- |
|            | Ca(ICC2/PI489777)SNP_27174 | 841  | A | C | 5  | 4  | --   | -- |
|            | Ca(ICC2/PI489777)SNP_27175 | 947  | A | G | 5  | 6  | --   | -- |
|            | Ca(ICC2/PI489777)SNP_27176 | 1041 | A | G | 6  | 4  | --   | -- |
|            | Ca(ICC2/PI489777)SNP_27177 | 1197 | G | A | 7  | 4  | --   | -- |
|            | Ca(ICC2/PI489777)SNP_27178 | 1200 | T | G | 7  | 4  | --   | -- |
| CakTC25591 | Ca(ICC2/PI489777)SNP_27179 | 930  | T | G | 36 | 19 | --   | -- |
| CakTC36929 | Ca(ICC2/PI489777)SNP_27180 | 940  | G | T | 6  | 8  | --   | -- |
|            | Ca(ICC2/PI489777)SNP_27181 | 981  | A | G | 6  | 9  | --   | -- |
|            | Ca(ICC2/PI489777)SNP_27182 | 1418 | C | T | 9  | 9  | --   | -- |
|            | Ca(ICC2/PI489777)SNP_27183 | 1653 | C | G | 6  | 7  | --   | -- |
|            | Ca(ICC2/PI489777)SNP_27184 | 2006 | C | T | 8  | 6  | --   | -- |
|            | Ca(ICC2/PI489777)SNP_27185 | 2157 | T | C | 12 | 4  | --   | -- |
|            | Ca(ICC2/PI489777)SNP_27186 | 2240 | T | C | 8  | 4  | --   | -- |
|            | Ca(ICC2/PI489777)SNP_27187 | 3431 | T | C | 17 | 9  | --   | -- |
|            | Ca(ICC2/PI489777)SNP_27188 | 4106 | T | G | 11 | 5  | --   | -- |
| CakTC04399 | Ca(ICC2/PI489777)SNP_27189 | 135  | G | C | 22 | 22 | --   | -- |
|            | Ca(ICC2/PI489777)SNP_27190 | 161  | C | G | 28 | 23 | --   | -- |
|            | Ca(ICC2/PI489777)SNP_27191 | 162  | A | T | 26 | 24 | --   | -- |
|            | Ca(ICC2/PI489777)SNP_27192 | 837  | A | G | 26 | 6  | --   | -- |
|            | Ca(ICC2/PI489777)SNP_27193 | 867  | C | T | 23 | 6  | --   | -- |
| CakTC29463 | Ca(ICC2/PI489777)SNP_27194 | 53   | A | G | 5  | 5  | --   | -- |
|            | Ca(ICC2/PI489777)SNP_27195 | 95   | C | T | 10 | 5  | --   | -- |
|            | Ca(ICC2/PI489777)SNP_27196 | 601  | T | C | 19 | 16 | --   | -- |
|            | Ca(ICC2/PI489777)SNP_27197 | 640  | T | G | 25 | 14 | --   | -- |
|            | Ca(ICC2/PI489777)SNP_27198 | 678  | A | C | 20 | 14 | --   | -- |
| CakTC26967 | Ca(ICC2/PI489777)SNP_27199 | 1357 | C | T | 33 | 26 | --   | -- |
| CakTC42635 | Ca(ICC2/PI489777)SNP_27200 | 231  | T | C | 3  | 5  | --   | -- |
|            | Ca(ICC2/PI489777)SNP_27201 | 887  | A | G | 5  | 3  | --   | -- |
|            | Ca(ICC2/PI489777)SNP_27202 | 1184 | A | G | 17 | 13 | --   | -- |
|            | Ca(ICC2/PI489777)SNP_27203 | 1679 | A | G | 6  | 8  | --   | -- |
|            | Ca(ICC2/PI489777)SNP_27204 | 1694 | C | T | 6  | 6  | --   | -- |
|            | Ca(ICC2/PI489777)SNP_27205 | 1701 | A | G | 6  | 5  | --   | -- |
| CakTC17073 | Ca(ICC2/PI489777)SNP_27206 | 278  | G | C | 7  | 3  | --   | -- |
| CakTC07851 | Ca(ICC2/PI489777)SNP_27207 | 897  | C | T | 3  | 4  | --   | -- |
|            | Ca(ICC2/PI489777)SNP_27208 | 912  | T | C | 5  | 4  | --   | -- |
|            | Ca(ICC2/PI489777)SNP_27209 | 1113 | A | G | 3  | 4  | --   | -- |
|            | Ca(ICC2/PI489777)SNP_27210 | 1260 | A | G | 5  | 4  | --   | -- |
|            | Ca(ICC2/PI489777)SNP_27211 | 1386 | T | C | 3  | 3  | --   | -- |
|            | Ca(ICC2/PI489777)SNP_27212 | 1458 | A | G | 3  | 3  | --   | -- |
| CakTC28367 | Ca(ICC2/PI489777)SNP_27213 | 424  | T | C | 5  | 5  | --   | -- |
| CakTC37833 | Ca(ICC2/PI489777)SNP_27214 | 1026 | C | T | 16 | 23 | --   | -- |
|            | Ca(ICC2/PI489777)SNP_27215 | 1386 | T | C | 8  | 3  | --   | -- |
| CakTC41119 | Ca(ICC2/PI489777)SNP_27216 | 54   | C | T | 7  | 8  | --   | -- |
|            | Ca(ICC2/PI489777)SNP_27217 | 87   | T | C | 19 | 10 | --   | -- |
|            | Ca(ICC2/PI489777)SNP_27218 | 198  | A | G | 24 | 13 | --   | -- |
|            | Ca(ICC2/PI489777)SNP_27219 | 434  | C | T | 22 | 16 | --   | -- |
|            | Ca(ICC2/PI489777)SNP_27220 | 710  | C | T | 13 | 5  | --   | -- |
|            | Ca(ICC2/PI489777)SNP_27221 | 974  | C | T | 29 | 14 | --   | -- |
|            | Ca(ICC2/PI489777)SNP_27222 | 1013 | C | T | 32 | 16 | --   | -- |
|            | Ca(ICC2/PI489777)SNP_27223 | 1052 | A | T | 38 | 15 | --   | -- |
|            | Ca(ICC2/PI489777)SNP_27224 | 1336 | C | T | 32 | 19 | --   | -- |
|            | Ca(ICC2/PI489777)SNP_27225 | 1643 | T | C | 39 | 21 | --   | -- |
| CakTC28074 | Ca(ICC2/PI489777)SNP_27226 | 228  | T | G | 12 | 4  | --   | -- |
|            | Ca(ICC2/PI489777)SNP_27227 | 263  | A | T | 18 | 8  | --   | -- |



|            |                            |      |   |   |    |    |      |       |
|------------|----------------------------|------|---|---|----|----|------|-------|
|            | Ca(ICC2/PI489777)SNP_27228 | 392  | T | A | 22 | 9  | --   | --    |
|            | Ca(ICC2/PI489777)SNP_27229 | 512  | T | C | 17 | 10 | --   | --    |
|            | Ca(ICC2/PI489777)SNP_27230 | 632  | A | G | 14 | 8  | --   | --    |
|            | Ca(ICC2/PI489777)SNP_27231 | 890  | T | C | 16 | 9  | --   | --    |
|            | Ca(ICC2/PI489777)SNP_27232 | 1097 | A | T | 21 | 11 | --   | --    |
|            | Ca(ICC2/PI489777)SNP_27233 | 1254 | C | A | 15 | 6  | --   | --    |
|            | Ca(ICC2/PI489777)SNP_27234 | 1362 | T | A | 11 | 5  | --   | --    |
| CakTC32813 | Ca(ICC2/PI489777)SNP_27235 | 543  | A | T | 3  | 3  | --   | --    |
|            | Ca(ICC2/PI489777)SNP_27236 | 1168 | A | C | 9  | 3  | --   | --    |
|            | Ca(ICC2/PI489777)SNP_27237 | 1181 | T | C | 8  | 3  | --   | --    |
|            | Ca(ICC2/PI489777)SNP_27238 | 1339 | C | T | 7  | 3  | --   | --    |
| CakTC37635 | Ca(ICC2/PI489777)SNP_27239 | 322  | T | A | 19 | 3  | --   | --    |
| CakTC37211 | Ca(ICC2/PI489777)SNP_27240 | 357  | T | G | 19 | 11 | --   | --    |
|            | Ca(ICC2/PI489777)SNP_27241 | 366  | C | T | 19 | 10 | --   | --    |
|            | Ca(ICC2/PI489777)SNP_27242 | 654  | A | G | 37 | 19 | --   | --    |
| CakTC37804 | Ca(ICC2/PI489777)SNP_27243 | 332  | C | T | 5  | 4  | --   | --    |
| CakTC23843 | Ca(ICC2/PI489777)SNP_27244 | 315  | C | T | 4  | 4  | --   | DBP   |
|            | Ca(ICC2/PI489777)SNP_27245 | 347  | T | G | 5  | 3  | --   | DBP   |
|            | Ca(ICC2/PI489777)SNP_27246 | 558  | T | C | 24 | 17 | --   | DBP   |
| CakTC28270 | Ca(ICC2/PI489777)SNP_27247 | 378  | G | A | 7  | 10 | --   | WRKY  |
|            | Ca(ICC2/PI489777)SNP_27248 | 576  | T | C | 7  | 7  | --   | WRKY  |
|            | Ca(ICC2/PI489777)SNP_27249 | 1667 | G | C | 15 | 3  | --   | WRKY  |
|            | Ca(ICC2/PI489777)SNP_27250 | 1891 | C | T | 7  | 3  | --   | WRKY  |
| CakTC38428 | Ca(ICC2/PI489777)SNP_27251 | 282  | G | T | 3  | 3  | --   | --    |
| CakTC37687 | Ca(ICC2/PI489777)SNP_27252 | 691  | G | A | 49 | 44 | --   | --    |
|            | Ca(ICC2/PI489777)SNP_27253 | 858  | A | G | 53 | 42 | --   | --    |
|            | Ca(ICC2/PI489777)SNP_27254 | 1069 | G | T | 25 | 21 | --   | --    |
|            | Ca(ICC2/PI489777)SNP_27255 | 1171 | C | T | 15 | 13 | --   | --    |
| CakTC22511 | Ca(ICC2/PI489777)SNP_27256 | 1541 | T | C | 92 | 36 | Root | --    |
|            | Ca(ICC2/PI489777)SNP_27257 | 1747 | T | C | 85 | 54 | Root | --    |
|            | Ca(ICC2/PI489777)SNP_27258 | 1790 | A | G | 64 | 49 | Root | --    |
|            | Ca(ICC2/PI489777)SNP_27259 | 1928 | A | T | 62 | 64 | Root | --    |
| CakTC09985 | Ca(ICC2/PI489777)SNP_27260 | 1373 | G | A | 48 | 17 | --   | --    |
|            | Ca(ICC2/PI489777)SNP_27261 | 1663 | G | A | 23 | 15 | --   | --    |
| CakTC21048 | Ca(ICC2/PI489777)SNP_27262 | 768  | T | C | 5  | 3  | --   | --    |
|            | Ca(ICC2/PI489777)SNP_27263 | 849  | A | T | 7  | 3  | --   | --    |
|            | Ca(ICC2/PI489777)SNP_27264 | 1378 | C | T | 3  | 3  | --   | --    |
| CakTC26784 | Ca(ICC2/PI489777)SNP_27265 | 748  | T | G | 79 | 83 | --   | --    |
| CakTC11079 | Ca(ICC2/PI489777)SNP_27266 | 247  | C | T | 4  | 9  | --   | --    |
|            | Ca(ICC2/PI489777)SNP_27267 | 301  | T | C | 4  | 9  | --   | --    |
| CakTC25871 | Ca(ICC2/PI489777)SNP_27268 | 222  | C | T | 5  | 5  | --   | --    |
| CakTC30091 | Ca(ICC2/PI489777)SNP_27269 | 566  | A | G | 5  | 4  | --   | zf-HD |
|            | Ca(ICC2/PI489777)SNP_27270 | 703  | C | T | 4  | 4  | --   | zf-HD |
|            | Ca(ICC2/PI489777)SNP_27271 | 800  | C | G | 4  | 3  | --   | zf-HD |
| CakTC42077 | Ca(ICC2/PI489777)SNP_27272 | 360  | T | C | 5  | 5  | --   | --    |
|            | Ca(ICC2/PI489777)SNP_27273 | 533  | A | G | 11 | 12 | --   | --    |
|            | Ca(ICC2/PI489777)SNP_27274 | 971  | G | C | 16 | 11 | --   | --    |
| CakTC28315 | Ca(ICC2/PI489777)SNP_27275 | 255  | A | G | 5  | 5  | --   | --    |
|            | Ca(ICC2/PI489777)SNP_27276 | 651  | T | C | 23 | 9  | --   | --    |
|            | Ca(ICC2/PI489777)SNP_27277 | 1069 | A | G | 16 | 11 | --   | --    |
|            | Ca(ICC2/PI489777)SNP_27278 | 1125 | T | A | 9  | 9  | --   | --    |
|            | Ca(ICC2/PI489777)SNP_27279 | 1148 | A | G | 14 | 11 | --   | --    |
|            | Ca(ICC2/PI489777)SNP_27280 | 1255 | T | C | 16 | 8  | --   | --    |
|            | Ca(ICC2/PI489777)SNP_27281 | 1470 | C | A | 11 | 6  | --   | --    |
|            | Ca(ICC2/PI489777)SNP_27282 | 1489 | A | G | 12 | 6  | --   | --    |
|            | Ca(ICC2/PI489777)SNP_27283 | 1772 | C | T | 11 | 4  | --   | --    |
| CakTC40933 | Ca(ICC2/PI489777)SNP_27284 | 67   | T | G | 6  | 8  | --   | --    |
|            | Ca(ICC2/PI489777)SNP_27285 | 91   | T | C | 8  | 9  | --   | --    |
|            | Ca(ICC2/PI489777)SNP_27286 | 702  | A | C | 77 | 91 | --   | --    |
| CakTC24646 | Ca(ICC2/PI489777)SNP_27287 | 573  | T | C | 61 | 32 | --   | HB    |
|            | Ca(ICC2/PI489777)SNP_27288 | 1356 | G | T | 42 | 36 | --   | HB    |
|            | Ca(ICC2/PI489777)SNP_27289 | 1513 | G | T | 23 | 7  | --   | HB    |
|            | Ca(ICC2/PI489777)SNP_27290 | 1531 | G | A | 19 | 9  | --   | HB    |
| CakTC32348 | Ca(ICC2/PI489777)SNP_27291 | 1049 | A | C | 9  | 6  | --   | --    |
|            | Ca(ICC2/PI489777)SNP_27292 | 2050 | T | C | 8  | 5  | --   | --    |
| CakTC41583 | Ca(ICC2/PI489777)SNP_27293 | 251  | C | G | 7  | 4  | --   | --    |
|            | Ca(ICC2/PI489777)SNP_27294 | 471  | A | G | 4  | 5  | --   | --    |
|            | Ca(ICC2/PI489777)SNP_27295 | 483  | A | G | 3  | 6  | --   | --    |
|            | Ca(ICC2/PI489777)SNP_27296 | 747  | C | T | 12 | 4  | --   | --    |
|            | Ca(ICC2/PI489777)SNP_27297 | 777  | C | T | 12 | 4  | --   | --    |
|            | Ca(ICC2/PI489777)SNP_27298 | 1155 | C | T | 6  | 3  | --   | --    |
|            | Ca(ICC2/PI489777)SNP_27299 | 1288 | A | G | 8  | 7  | --   | --    |
|            | Ca(ICC2/PI489777)SNP_27300 | 1519 | A | T | 5  | 5  | --   | --    |
|            | Ca(ICC2/PI489777)SNP_27301 | 1528 | G | T | 6  | 6  | --   | --    |

|            |                            |      |   |   |    |    |        |           |
|------------|----------------------------|------|---|---|----|----|--------|-----------|
| CakTC40335 | Ca(ICC2/Pi489777)SNP_27302 | 199  | T | G | 44 | 13 | --     | TPR       |
|            | Ca(ICC2/Pi489777)SNP_27303 | 201  | T | C | 40 | 13 | --     | TPR       |
|            | Ca(ICC2/Pi489777)SNP_27304 | 641  | G | C | 12 | 9  | --     | TPR       |
| CakTC38523 | Ca(ICC2/Pi489777)SNP_27305 | 459  | G | A | 27 | 14 | --     | --        |
| CakTC24764 | Ca(ICC2/Pi489777)SNP_27306 | 407  | G | A | 24 | 4  | --     | --        |
|            | Ca(ICC2/Pi489777)SNP_27307 | 517  | C | T | 29 | 10 | --     | --        |
|            | Ca(ICC2/Pi489777)SNP_27308 | 654  | C | T | 34 | 12 | --     | --        |
| CakTC24592 | Ca(ICC2/Pi489777)SNP_27309 | 730  | T | G | 20 | 7  | --     | --        |
|            | Ca(ICC2/Pi489777)SNP_27310 | 831  | A | T | 16 | 6  | --     | --        |
|            | Ca(ICC2/Pi489777)SNP_27311 | 879  | C | A | 13 | 7  | --     | --        |
|            | Ca(ICC2/Pi489777)SNP_27312 | 953  | G | A | 11 | 5  | --     | --        |
| CakTC08814 | Ca(ICC2/Pi489777)SNP_27313 | 675  | C | T | 3  | 3  | --     | --        |
| CakTC24219 | Ca(ICC2/Pi489777)SNP_27314 | 593  | T | C | 16 | 3  | --     | --        |
| CakTC37412 | Ca(ICC2/Pi489777)SNP_27315 | 190  | A | T | 8  | 5  | --     | --        |
|            | Ca(ICC2/Pi489777)SNP_27316 | 305  | A | G | 10 | 8  | --     | --        |
|            | Ca(ICC2/Pi489777)SNP_27317 | 470  | G | A | 6  | 6  | --     | --        |
| CakTC41742 | Ca(ICC2/Pi489777)SNP_27318 | 1397 | A | G | 16 | 14 | --     | --        |
|            | Ca(ICC2/Pi489777)SNP_27319 | 1617 | A | C | 3  | 9  | --     | --        |
|            | Ca(ICC2/Pi489777)SNP_27320 | 1895 | T | A | 4  | 12 | --     | --        |
|            | Ca(ICC2/Pi489777)SNP_27321 | 1991 | A | G | 4  | 10 | --     | --        |
|            | Ca(ICC2/Pi489777)SNP_27322 | 2063 | T | C | 6  | 14 | --     | --        |
| CakTC29038 | Ca(ICC2/Pi489777)SNP_27323 | 413  | G | A | 3  | 6  | Flower | bud       |
| CakTC41232 | Ca(ICC2/Pi489777)SNP_27324 | 449  | C | G | 3  | 3  | --     | HB        |
|            | Ca(ICC2/Pi489777)SNP_27325 | 858  | A | G | 8  | 6  | --     | HB        |
|            | Ca(ICC2/Pi489777)SNP_27326 | 887  | G | A | 9  | 7  | --     | HB        |
|            | Ca(ICC2/Pi489777)SNP_27327 | 896  | A | G | 9  | 7  | --     | HB        |
|            | Ca(ICC2/Pi489777)SNP_27328 | 899  | G | A | 9  | 7  | --     | HB        |
| CakTC28108 | Ca(ICC2/Pi489777)SNP_27329 | 212  | A | C | 31 | 13 | --     | --        |
|            | Ca(ICC2/Pi489777)SNP_27330 | 226  | A | G | 33 | 15 | --     | --        |
|            | Ca(ICC2/Pi489777)SNP_27331 | 518  | T | C | 22 | 16 | --     | --        |
|            | Ca(ICC2/Pi489777)SNP_27332 | 1539 | T | C | 38 | 8  | --     | --        |
|            | Ca(ICC2/Pi489777)SNP_27333 | 1586 | G | A | 50 | 6  | --     | --        |
| CakTC41110 | Ca(ICC2/Pi489777)SNP_27334 | 375  | A | G | 5  | 13 | --     | AP2-EREBP |
|            | Ca(ICC2/Pi489777)SNP_27335 | 392  | A | G | 5  | 13 | --     | AP2-EREBP |
|            | Ca(ICC2/Pi489777)SNP_27336 | 429  | T | C | 4  | 12 | --     | AP2-EREBP |
|            | Ca(ICC2/Pi489777)SNP_27337 | 539  | T | C | 3  | 12 | --     | AP2-EREBP |
| CakTC42386 | Ca(ICC2/Pi489777)SNP_27338 | 63   | C | T | 45 | 55 | --     | --        |
|            | Ca(ICC2/Pi489777)SNP_27339 | 85   | C | G | 76 | 68 | --     | --        |
|            | Ca(ICC2/Pi489777)SNP_27340 | 136  | G | A | 78 | 70 | --     | --        |
|            | Ca(ICC2/Pi489777)SNP_27341 | 728  | G | A | 10 | 14 | --     | --        |
| CakTC27108 | Ca(ICC2/Pi489777)SNP_27342 | 465  | C | A | 6  | 4  | --     | --        |
|            | Ca(ICC2/Pi489777)SNP_27343 | 633  | A | G | 7  | 6  | --     | --        |
|            | Ca(ICC2/Pi489777)SNP_27344 | 713  | T | C | 8  | 5  | --     | --        |
|            | Ca(ICC2/Pi489777)SNP_27345 | 1011 | A | G | 8  | 3  | --     | --        |
| CakTC42748 | Ca(ICC2/Pi489777)SNP_27346 | 530  | A | G | 4  | 4  | --     | --        |
|            | Ca(ICC2/Pi489777)SNP_27347 | 535  | T | A | 3  | 5  | --     | --        |
|            | Ca(ICC2/Pi489777)SNP_27348 | 635  | A | T | 4  | 3  | --     | --        |
| CakTC02338 | Ca(ICC2/Pi489777)SNP_27349 | 1008 | G | A | 7  | 11 | --     | --        |
| CakTC24597 | Ca(ICC2/Pi489777)SNP_27350 | 260  | T | G | 11 | 6  | Root   | --        |
| CakTC25649 | Ca(ICC2/Pi489777)SNP_27351 | 602  | T | G | 4  | 5  | Flower | bud       |
|            | Ca(ICC2/Pi489777)SNP_27352 | 610  | C | T | 4  | 5  | Flower | bud       |
|            | Ca(ICC2/Pi489777)SNP_27353 | 652  | G | A | 4  | 6  | Flower | bud       |
| CakTC37339 | Ca(ICC2/Pi489777)SNP_27354 | 45   | C | G | 36 | 19 | --     | --        |
|            | Ca(ICC2/Pi489777)SNP_27355 | 127  | C | G | 47 | 28 | --     | --        |
|            | Ca(ICC2/Pi489777)SNP_27356 | 143  | C | T | 46 | 28 | --     | --        |
|            | Ca(ICC2/Pi489777)SNP_27357 | 302  | C | T | 56 | 38 | --     | --        |
|            | Ca(ICC2/Pi489777)SNP_27358 | 407  | G | C | 43 | 40 | --     | --        |
|            | Ca(ICC2/Pi489777)SNP_27359 | 416  | T | C | 54 | 37 | --     | --        |
|            | Ca(ICC2/Pi489777)SNP_27360 | 524  | C | T | 48 | 29 | --     | --        |
|            | Ca(ICC2/Pi489777)SNP_27361 | 788  | T | C | 45 | 17 | --     | --        |
|            | Ca(ICC2/Pi489777)SNP_27362 | 983  | C | T | 22 | 8  | --     | --        |
|            | Ca(ICC2/Pi489777)SNP_27363 | 1040 | G | A | 17 | 4  | --     | --        |
| CakTC31659 | Ca(ICC2/Pi489777)SNP_27364 | 1512 | G | T | 4  | 6  | --     | --        |
|            | Ca(ICC2/Pi489777)SNP_27365 | 2308 | A | G | 3  | 4  | --     | --        |
| CakTC36577 | Ca(ICC2/Pi489777)SNP_27366 | 273  | A | G | 8  | 6  | --     | --        |
|            | Ca(ICC2/Pi489777)SNP_27367 | 295  | G | C | 8  | 6  | --     | --        |
|            | Ca(ICC2/Pi489777)SNP_27368 | 316  | C | G | 6  | 6  | --     | --        |
| CakTC23505 | Ca(ICC2/Pi489777)SNP_27369 | 597  | A | G | 18 | 7  | --     | --        |
|            | Ca(ICC2/Pi489777)SNP_27370 | 618  | G | T | 16 | 5  | --     | --        |
|            | Ca(ICC2/Pi489777)SNP_27371 | 695  | G | A | 10 | 10 | --     | --        |
|            | Ca(ICC2/Pi489777)SNP_27372 | 854  | A | G | 16 | 8  | --     | --        |
| CakTC11732 | Ca(ICC2/Pi489777)SNP_27373 | 280  | G | C | 6  | 6  | --     | --        |
|            | Ca(ICC2/Pi489777)SNP_27374 | 354  | T | C | 4  | 4  | --     | --        |
|            | Ca(ICC2/Pi489777)SNP_27375 | 513  | T | A | 4  | 6  | --     | --        |

|            |                            |      |   |   |     |    |    |             |
|------------|----------------------------|------|---|---|-----|----|----|-------------|
|            | Ca(ICC2/PI489777)SNP_27376 | 948  | C | G | 20  | 9  | -- | --          |
|            | Ca(ICC2/PI489777)SNP_27377 | 1413 | A | G | 6   | 3  | -- | --          |
|            | Ca(ICC2/PI489777)SNP_27378 | 1725 | C | A | 4   | 4  | -- | --          |
| CakTC36878 | Ca(ICC2/PI489777)SNP_27379 | 253  | C | T | 14  | 10 | -- | --          |
| CakTC31284 | Ca(ICC2/PI489777)SNP_27380 | 820  | T | C | 21  | 19 | -- | --          |
|            | Ca(ICC2/PI489777)SNP_27381 | 883  | G | A | 20  | 18 | -- | --          |
|            | Ca(ICC2/PI489777)SNP_27382 | 966  | T | C | 14  | 11 | -- | --          |
| CakTC39043 | Ca(ICC2/PI489777)SNP_27383 | 621  | A | G | 6   | 8  | -- | --          |
|            | Ca(ICC2/PI489777)SNP_27384 | 720  | T | C | 6   | 8  | -- | --          |
|            | Ca(ICC2/PI489777)SNP_27385 | 922  | G | T | 4   | 7  | -- | --          |
| CakTC24999 | Ca(ICC2/PI489777)SNP_27386 | 570  | T | C | 214 | 26 | -- | --          |
|            | Ca(ICC2/PI489777)SNP_27387 | 921  | C | T | 207 | 81 | -- | --          |
|            | Ca(ICC2/PI489777)SNP_27388 | 996  | G | A | 106 | 91 | -- | --          |
| CakTC27364 | Ca(ICC2/PI489777)SNP_27389 | 859  | T | C | 10  | 4  | -- | --          |
| CakTC37064 | Ca(ICC2/PI489777)SNP_27390 | 2035 | C | A | 3   | 3  | -- | --          |
| CakTC42960 | Ca(ICC2/PI489777)SNP_27391 | 198  | T | C | 18  | 30 | -- | --          |
|            | Ca(ICC2/PI489777)SNP_27392 | 215  | C | G | 22  | 30 | -- | --          |
|            | Ca(ICC2/PI489777)SNP_27393 | 381  | C | G | 26  | 41 | -- | --          |
|            | Ca(ICC2/PI489777)SNP_27394 | 433  | T | G | 26  | 42 | -- | --          |
|            | Ca(ICC2/PI489777)SNP_27395 | 486  | T | C | 22  | 46 | -- | --          |
|            | Ca(ICC2/PI489777)SNP_27396 | 529  | C | G | 24  | 41 | -- | --          |
|            | Ca(ICC2/PI489777)SNP_27397 | 567  | C | T | 17  | 39 | -- | --          |
|            | Ca(ICC2/PI489777)SNP_27398 | 646  | C | G | 14  | 21 | -- | --          |
|            | Ca(ICC2/PI489777)SNP_27399 | 696  | C | G | 10  | 17 | -- | --          |
|            | Ca(ICC2/PI489777)SNP_27400 | 807  | G | A | 7   | 5  | -- | --          |
| CakTC42485 | Ca(ICC2/PI489777)SNP_27401 | 54   | T | C | 9   | 5  | -- | --          |
|            | Ca(ICC2/PI489777)SNP_27402 | 174  | T | C | 9   | 7  | -- | --          |
|            | Ca(ICC2/PI489777)SNP_27403 | 192  | T | C | 9   | 12 | -- | --          |
|            | Ca(ICC2/PI489777)SNP_27404 | 252  | C | T | 9   | 14 | -- | --          |
|            | Ca(ICC2/PI489777)SNP_27405 | 302  | C | G | 10  | 16 | -- | --          |
|            | Ca(ICC2/PI489777)SNP_27406 | 324  | T | C | 10  | 16 | -- | --          |
|            | Ca(ICC2/PI489777)SNP_27407 | 363  | C | G | 10  | 15 | -- | --          |
|            | Ca(ICC2/PI489777)SNP_27408 | 735  | C | T | 6   | 3  | -- | --          |
|            | Ca(ICC2/PI489777)SNP_27409 | 738  | G | A | 6   | 3  | -- | --          |
| CakTC38991 | Ca(ICC2/PI489777)SNP_27410 | 526  | C | T | 36  | 12 | -- | MYB         |
|            | Ca(ICC2/PI489777)SNP_27411 | 720  | G | C | 41  | 21 | -- | MYB         |
|            | Ca(ICC2/PI489777)SNP_27412 | 774  | A | C | 39  | 21 | -- | MYB         |
| CakTC10052 | Ca(ICC2/PI489777)SNP_27413 | 2920 | T | C | 12  | 7  | -- | Jumonji     |
| CakTC33173 | Ca(ICC2/PI489777)SNP_27414 | 158  | G | A | 6   | 4  | -- | --          |
|            | Ca(ICC2/PI489777)SNP_27415 | 172  | A | C | 6   | 4  | -- | --          |
|            | Ca(ICC2/PI489777)SNP_27416 | 181  | G | T | 6   | 4  | -- | --          |
|            | Ca(ICC2/PI489777)SNP_27417 | 183  | A | T | 6   | 4  | -- | --          |
|            | Ca(ICC2/PI489777)SNP_27418 | 217  | A | G | 7   | 4  | -- | --          |
|            | Ca(ICC2/PI489777)SNP_27419 | 700  | C | T | 31  | 9  | -- | --          |
| CakTC03257 | Ca(ICC2/PI489777)SNP_27420 | 1627 | G | A | 3   | 3  | -- | --          |
| CakTC42490 | Ca(ICC2/PI489777)SNP_27421 | 845  | C | G | 58  | 22 | -- | --          |
|            | Ca(ICC2/PI489777)SNP_27422 | 915  | G | A | 55  | 19 | -- | --          |
|            | Ca(ICC2/PI489777)SNP_27423 | 976  | C | A | 10  | 7  | -- | --          |
| CakTC31391 | Ca(ICC2/PI489777)SNP_27424 | 1075 | G | A | 4   | 4  | -- | --          |
|            | Ca(ICC2/PI489777)SNP_27425 | 1184 | T | G | 10  | 3  | -- | --          |
|            | Ca(ICC2/PI489777)SNP_27426 | 1191 | C | T | 11  | 5  | -- | --          |
|            | Ca(ICC2/PI489777)SNP_27427 | 1233 | A | G | 11  | 3  | -- | --          |
|            | Ca(ICC2/PI489777)SNP_27428 | 1263 | A | G | 6   | 3  | -- | --          |
|            | Ca(ICC2/PI489777)SNP_27429 | 2053 | T | G | 3   | 6  | -- | --          |
| CakTC09901 | Ca(ICC2/PI489777)SNP_27430 | 475  | C | T | 3   | 3  | -- | --          |
| CakTC25744 | Ca(ICC2/PI489777)SNP_27431 | 923  | A | G | 41  | 24 | -- | --          |
| CakTC23642 | Ca(ICC2/PI489777)SNP_27432 | 155  | C | G | 13  | 7  | -- | --          |
|            | Ca(ICC2/PI489777)SNP_27433 | 200  | A | T | 14  | 9  | -- | --          |
|            | Ca(ICC2/PI489777)SNP_27434 | 202  | A | G | 13  | 9  | -- | --          |
| CakTC25586 | Ca(ICC2/PI489777)SNP_27435 | 489  | T | A | 8   | 5  | -- | --          |
| CakTC30746 | Ca(ICC2/PI489777)SNP_27436 | 815  | A | T | 5   | 7  | -- | --          |
|            | Ca(ICC2/PI489777)SNP_27437 | 818  | A | G | 5   | 7  | -- | --          |
| CakTC33058 | Ca(ICC2/PI489777)SNP_27438 | 1354 | A | G | 9   | 5  | -- | MYB-related |
|            | Ca(ICC2/PI489777)SNP_27439 | 2341 | G | A | 5   | 8  | -- | MYB-related |
|            | Ca(ICC2/PI489777)SNP_27440 | 2599 | G | A | 19  | 7  | -- | MYB-related |
| CakTC27353 | Ca(ICC2/PI489777)SNP_27441 | 225  | C | G | 12  | 7  | -- | --          |
|            | Ca(ICC2/PI489777)SNP_27442 | 394  | A | G | 16  | 10 | -- | --          |
|            | Ca(ICC2/PI489777)SNP_27443 | 439  | G | A | 18  | 10 | -- | --          |
|            | Ca(ICC2/PI489777)SNP_27444 | 838  | A | G | 20  | 14 | -- | --          |
|            | Ca(ICC2/PI489777)SNP_27445 | 1159 | A | G | 6   | 12 | -- | --          |
|            | Ca(ICC2/PI489777)SNP_27446 | 1252 | T | C | 6   | 16 | -- | --          |
|            | Ca(ICC2/PI489777)SNP_27447 | 1270 | C | A | 3   | 14 | -- | --          |
| CakTC25289 | Ca(ICC2/PI489777)SNP_27448 | 598  | G | A | 49  | 16 | -- | C2C2-GATA   |
|            | Ca(ICC2/PI489777)SNP_27449 | 730  | T | C | 53  | 15 | -- | C2C2-GATA   |

|            |                            |      |   |   |     |    |       |           |
|------------|----------------------------|------|---|---|-----|----|-------|-----------|
|            | Ca(ICC2/PI489777)SNP_27450 | 786  | T | C | 45  | 15 | --    | C2C2-GATA |
|            | Ca(ICC2/PI489777)SNP_27451 | 812  | T | C | 49  | 17 | --    | C2C2-GATA |
|            | Ca(ICC2/PI489777)SNP_27452 | 875  | A | C | 51  | 21 | --    | C2C2-GATA |
|            | Ca(ICC2/PI489777)SNP_27453 | 1288 | A | C | 38  | 17 | --    | C2C2-GATA |
| CakTC38402 | Ca(ICC2/PI489777)SNP_27454 | 573  | T | C | 10  | 4  | --    | --        |
|            | Ca(ICC2/PI489777)SNP_27455 | 729  | T | C | 9   | 8  | --    | --        |
| CakTC41636 | Ca(ICC2/PI489777)SNP_27456 | 227  | G | C | 5   | 8  | --    | --        |
| CakTC28727 | Ca(ICC2/PI489777)SNP_27457 | 1687 | C | A | 19  | 6  | --    | --        |
| CakTC10966 | Ca(ICC2/PI489777)SNP_27458 | 337  | T | C | 5   | 3  | --    | --        |
| CakTC26716 | Ca(ICC2/PI489777)SNP_27459 | 75   | A | G | 22  | 21 | --    | --        |
|            | Ca(ICC2/PI489777)SNP_27460 | 113  | G | C | 21  | 23 | --    | --        |
| CakTC30852 | Ca(ICC2/PI489777)SNP_27461 | 878  | T | C | 5   | 3  | --    | --        |
| CakTC25100 | Ca(ICC2/PI489777)SNP_27462 | 1798 | T | A | 98  | 20 | --    | --        |
| CakTC28595 | Ca(ICC2/PI489777)SNP_27463 | 311  | G | C | 17  | 7  | --    | --        |
|            | Ca(ICC2/PI489777)SNP_27464 | 1503 | A | T | 14  | 8  | --    | --        |
|            | Ca(ICC2/PI489777)SNP_27465 | 1600 | A | C | 11  | 8  | --    | --        |
|            | Ca(ICC2/PI489777)SNP_27466 | 2695 | A | G | 5   | 6  | --    | --        |
| CakTC26576 | Ca(ICC2/PI489777)SNP_27467 | 412  | T | C | 46  | 6  | --    | --        |
|            | Ca(ICC2/PI489777)SNP_27468 | 436  | A | G | 43  | 6  | --    | --        |
|            | Ca(ICC2/PI489777)SNP_27469 | 502  | A | T | 72  | 8  | --    | --        |
|            | Ca(ICC2/PI489777)SNP_27470 | 629  | A | G | 60  | 7  | --    | --        |
| CakTC39176 | Ca(ICC2/PI489777)SNP_27471 | 546  | A | T | 6   | 4  | --    | --        |
| CakTC25070 | Ca(ICC2/PI489777)SNP_27472 | 344  | C | G | 6   | 6  | --    | --        |
|            | Ca(ICC2/PI489777)SNP_27473 | 454  | C | T | 11  | 10 | --    | --        |
|            | Ca(ICC2/PI489777)SNP_27474 | 1055 | T | C | 23  | 10 | --    | --        |
|            | Ca(ICC2/PI489777)SNP_27475 | 1192 | T | A | 16  | 7  | --    | --        |
|            | Ca(ICC2/PI489777)SNP_27476 | 1496 | C | G | 24  | 6  | --    | --        |
| CakTC32449 | Ca(ICC2/PI489777)SNP_27477 | 293  | G | T | 3   | 12 | --    | BSD       |
|            | Ca(ICC2/PI489777)SNP_27478 | 2043 | G | A | 6   | 3  | --    | BSD       |
|            | Ca(ICC2/PI489777)SNP_27479 | 2064 | A | C | 6   | 3  | --    | BSD       |
| CakTC41939 | Ca(ICC2/PI489777)SNP_27480 | 393  | G | A | 15  | 6  | --    | --        |
|            | Ca(ICC2/PI489777)SNP_27481 | 1084 | A | C | 32  | 6  | --    | --        |
| CakTC39810 | Ca(ICC2/PI489777)SNP_27482 | 250  | C | T | 8   | 12 | --    | --        |
| CakTC41018 | Ca(ICC2/PI489777)SNP_27483 | 507  | C | A | 61  | 54 | --    | --        |
|            | Ca(ICC2/PI489777)SNP_27484 | 1164 | T | C | 91  | 56 | --    | --        |
| CakTC35735 | Ca(ICC2/PI489777)SNP_27485 | 852  | C | T | 9   | 4  | --    | --        |
| CakTC37383 | Ca(ICC2/PI489777)SNP_27486 | 994  | G | A | 10  | 11 | --    | --        |
| CakTC22561 | Ca(ICC2/PI489777)SNP_27487 | 1575 | A | C | 4   | 5  | --    | --        |
| CakTC09680 | Ca(ICC2/PI489777)SNP_27488 | 324  | A | G | 10  | 4  | --    | --        |
|            | Ca(ICC2/PI489777)SNP_27489 | 562  | A | C | 11  | 4  | --    | --        |
|            | Ca(ICC2/PI489777)SNP_27490 | 563  | G | T | 11  | 4  | --    | --        |
|            | Ca(ICC2/PI489777)SNP_27491 | 612  | A | C | 8   | 3  | --    | --        |
| CakTC29340 | Ca(ICC2/PI489777)SNP_27492 | 278  | G | A | 38  | 42 | --    | --        |
|            | Ca(ICC2/PI489777)SNP_27493 | 416  | C | T | 76  | 39 | --    | --        |
| CakTC02565 | Ca(ICC2/PI489777)SNP_27494 | 438  | C | G | 3   | 13 | --    | --        |
| CakTC24713 | Ca(ICC2/PI489777)SNP_27495 | 1820 | G | A | 9   | 3  | Shoot | --        |
| CakTC42497 | Ca(ICC2/PI489777)SNP_27496 | 225  | A | G | 12  | 3  | --    | --        |
|            | Ca(ICC2/PI489777)SNP_27497 | 258  | G | C | 20  | 3  | --    | --        |
|            | Ca(ICC2/PI489777)SNP_27498 | 336  | T | C | 20  | 3  | --    | --        |
|            | Ca(ICC2/PI489777)SNP_27499 | 1715 | T | C | 3   | 4  | --    | --        |
| CakTC36647 | Ca(ICC2/PI489777)SNP_27500 | 1201 | A | T | 6   | 3  | --    | --        |
|            | Ca(ICC2/PI489777)SNP_27501 | 2573 | G | C | 3   | 3  | --    | --        |
| CakTC39422 | Ca(ICC2/PI489777)SNP_27502 | 964  | A | G | 13  | 7  | --    | --        |
|            | Ca(ICC2/PI489777)SNP_27503 | 1197 | A | G | 14  | 5  | --    | --        |
|            | Ca(ICC2/PI489777)SNP_27504 | 1213 | G | A | 13  | 6  | --    | --        |
| CakTC23677 | Ca(ICC2/PI489777)SNP_27505 | 698  | C | T | 11  | 4  | --    | --        |
|            | Ca(ICC2/PI489777)SNP_27506 | 699  | A | G | 11  | 5  | --    | --        |
| CakTC25143 | Ca(ICC2/PI489777)SNP_27507 | 180  | C | G | 27  | 3  | --    | --        |
|            | Ca(ICC2/PI489777)SNP_27508 | 189  | G | C | 31  | 3  | --    | --        |
|            | Ca(ICC2/PI489777)SNP_27509 | 281  | C | G | 33  | 4  | --    | --        |
|            | Ca(ICC2/PI489777)SNP_27510 | 467  | G | A | 19  | 3  | --    | --        |
|            | Ca(ICC2/PI489777)SNP_27511 | 604  | T | C | 11  | 3  | --    | --        |
| CakTC34271 | Ca(ICC2/PI489777)SNP_27512 | 594  | G | C | 6   | 7  | --    | --        |
|            | Ca(ICC2/PI489777)SNP_27513 | 1074 | A | G | 10  | 8  | --    | --        |
|            | Ca(ICC2/PI489777)SNP_27514 | 1484 | T | A | 6   | 11 | --    | --        |
|            | Ca(ICC2/PI489777)SNP_27515 | 2131 | T | G | 3   | 3  | --    | --        |
|            | Ca(ICC2/PI489777)SNP_27516 | 2175 | G | A | 3   | 4  | --    | --        |
| CakTC27055 | Ca(ICC2/PI489777)SNP_27517 | 920  | T | C | 102 | 35 | --    | NAC       |
| CakTC33278 | Ca(ICC2/PI489777)SNP_27518 | 183  | T | C | 5   | 4  | Root  | --        |
|            | Ca(ICC2/PI489777)SNP_27519 | 360  | G | A | 6   | 6  | Root  | --        |
|            | Ca(ICC2/PI489777)SNP_27520 | 417  | T | C | 8   | 6  | Root  | --        |
|            | Ca(ICC2/PI489777)SNP_27521 | 498  | G | T | 8   | 6  | Root  | --        |
| CakTC28115 | Ca(ICC2/PI489777)SNP_27522 | 130  | T | C | 5   | 7  | --    | --        |
|            | Ca(ICC2/PI489777)SNP_27523 | 375  | T | C | 12  | 12 | --    | --        |

|            |                            |      |   |   |    |    |    |              |
|------------|----------------------------|------|---|---|----|----|----|--------------|
|            | Ca(ICC2/PI489777)SNP_27524 | 400  | T | C | 12 | 13 | -- | --           |
| CakTC37927 | Ca(ICC2/PI489777)SNP_27525 | 262  | C | T | 17 | 9  | -- | --           |
|            | Ca(ICC2/PI489777)SNP_27526 | 445  | C | A | 14 | 9  | -- | --           |
| CakTC39300 | Ca(ICC2/PI489777)SNP_27527 | 258  | T | C | 19 | 7  | -- | Tify         |
|            | Ca(ICC2/PI489777)SNP_27528 | 374  | T | A | 25 | 9  | -- | Tify         |
|            | Ca(ICC2/PI489777)SNP_27529 | 444  | T | C | 27 | 11 | -- | Tify         |
|            | Ca(ICC2/PI489777)SNP_27530 | 501  | G | T | 18 | 14 | -- | Tify         |
|            | Ca(ICC2/PI489777)SNP_27531 | 675  | A | G | 16 | 12 | -- | Tify         |
| CakTC35910 | Ca(ICC2/PI489777)SNP_27532 | 160  | C | T | 12 | 6  | -- | --           |
|            | Ca(ICC2/PI489777)SNP_27533 | 748  | G | C | 22 | 12 | -- | --           |
|            | Ca(ICC2/PI489777)SNP_27534 | 858  | G | C | 25 | 16 | -- | --           |
|            | Ca(ICC2/PI489777)SNP_27535 | 947  | A | G | 20 | 15 | -- | --           |
|            | Ca(ICC2/PI489777)SNP_27536 | 1146 | G | A | 18 | 18 | -- | --           |
|            | Ca(ICC2/PI489777)SNP_27537 | 1173 | C | T | 19 | 15 | -- | --           |
|            | Ca(ICC2/PI489777)SNP_27538 | 1254 | A | G | 16 | 14 | -- | --           |
|            | Ca(ICC2/PI489777)SNP_27539 | 1676 | C | A | 18 | 10 | -- | --           |
|            | Ca(ICC2/PI489777)SNP_27540 | 1677 | A | G | 21 | 10 | -- | --           |
|            | Ca(ICC2/PI489777)SNP_27541 | 1826 | A | G | 19 | 16 | -- | --           |
|            | Ca(ICC2/PI489777)SNP_27542 | 1828 | A | T | 17 | 16 | -- | --           |
|            | Ca(ICC2/PI489777)SNP_27543 | 1851 | A | T | 16 | 13 | -- | --           |
|            | Ca(ICC2/PI489777)SNP_27544 | 1928 | T | C | 17 | 13 | -- | --           |
|            | Ca(ICC2/PI489777)SNP_27545 | 1993 | A | G | 18 | 19 | -- | --           |
|            | Ca(ICC2/PI489777)SNP_27546 | 2020 | T | C | 21 | 17 | -- | --           |
|            | Ca(ICC2/PI489777)SNP_27547 | 2077 | T | C | 16 | 17 | -- | --           |
|            | Ca(ICC2/PI489777)SNP_27548 | 2117 | T | A | 18 | 17 | -- | --           |
|            | Ca(ICC2/PI489777)SNP_27549 | 2299 | A | T | 21 | 19 | -- | --           |
|            | Ca(ICC2/PI489777)SNP_27550 | 2349 | G | A | 20 | 10 | -- | --           |
|            | Ca(ICC2/PI489777)SNP_27551 | 2587 | A | T | 47 | 17 | -- | --           |
|            | Ca(ICC2/PI489777)SNP_27552 | 2764 | C | T | 27 | 11 | -- | --           |
|            | Ca(ICC2/PI489777)SNP_27553 | 2808 | G | A | 21 | 9  | -- | --           |
| CakTC17861 | Ca(ICC2/PI489777)SNP_27554 | 165  | G | C | 18 | 12 | -- | --           |
|            | Ca(ICC2/PI489777)SNP_27555 | 174  | G | T | 18 | 10 | -- | --           |
|            | Ca(ICC2/PI489777)SNP_27556 | 194  | C | G | 23 | 16 | -- | --           |
|            | Ca(ICC2/PI489777)SNP_27557 | 205  | T | C | 24 | 16 | -- | --           |
|            | Ca(ICC2/PI489777)SNP_27558 | 231  | G | C | 43 | 16 | -- | --           |
|            | Ca(ICC2/PI489777)SNP_27559 | 260  | T | A | 37 | 14 | -- | --           |
|            | Ca(ICC2/PI489777)SNP_27560 | 295  | A | G | 51 | 17 | -- | --           |
|            | Ca(ICC2/PI489777)SNP_27561 | 313  | G | A | 49 | 17 | -- | --           |
| CakTC26353 | Ca(ICC2/PI489777)SNP_27562 | 360  | G | C | 21 | 3  | -- | --           |
|            | Ca(ICC2/PI489777)SNP_27563 | 690  | C | G | 34 | 5  | -- | --           |
|            | Ca(ICC2/PI489777)SNP_27564 | 828  | A | T | 39 | 10 | -- | --           |
|            | Ca(ICC2/PI489777)SNP_27565 | 836  | G | A | 39 | 10 | -- | --           |
|            | Ca(ICC2/PI489777)SNP_27566 | 1113 | A | G | 20 | 4  | -- | --           |
|            | Ca(ICC2/PI489777)SNP_27567 | 1399 | T | C | 37 | 4  | -- | --           |
|            | Ca(ICC2/PI489777)SNP_27568 | 1443 | A | G | 37 | 4  | -- | --           |
|            | Ca(ICC2/PI489777)SNP_27569 | 1485 | A | G | 36 | 3  | -- | --           |
|            | Ca(ICC2/PI489777)SNP_27570 | 1978 | C | T | 13 | 6  | -- | --           |
|            | Ca(ICC2/PI489777)SNP_27571 | 2030 | C | T | 16 | 7  | -- | --           |
|            | Ca(ICC2/PI489777)SNP_27572 | 2057 | T | C | 17 | 7  | -- | --           |
|            | Ca(ICC2/PI489777)SNP_27573 | 2170 | T | C | 16 | 6  | -- | --           |
|            | Ca(ICC2/PI489777)SNP_27574 | 2178 | G | A | 17 | 7  | -- | --           |
|            | Ca(ICC2/PI489777)SNP_27575 | 2214 | T | A | 19 | 10 | -- | --           |
| CakTC39893 | Ca(ICC2/PI489777)SNP_27576 | 2028 | T | C | 4  | 4  | -- | --           |
|            | Ca(ICC2/PI489777)SNP_27577 | 2277 | C | T | 5  | 3  | -- | --           |
|            | Ca(ICC2/PI489777)SNP_27578 | 2384 | A | T | 7  | 4  | -- | --           |
|            | Ca(ICC2/PI489777)SNP_27579 | 2487 | A | G | 5  | 4  | -- | --           |
|            | Ca(ICC2/PI489777)SNP_27580 | 3012 | A | C | 3  | 4  | -- | --           |
|            | Ca(ICC2/PI489777)SNP_27581 | 3066 | G | C | 4  | 3  | -- | --           |
| CakTC31258 | Ca(ICC2/PI489777)SNP_27582 | 819  | G | A | 9  | 11 | -- | --           |
|            | Ca(ICC2/PI489777)SNP_27583 | 852  | C | T | 12 | 9  | -- | --           |
|            | Ca(ICC2/PI489777)SNP_27584 | 1281 | T | C | 17 | 17 | -- | --           |
| CakTC29532 | Ca(ICC2/PI489777)SNP_27585 | 437  | T | A | 5  | 5  | -- | Trihelix     |
|            | Ca(ICC2/PI489777)SNP_27586 | 566  | A | C | 3  | 4  | -- | Trihelix     |
|            | Ca(ICC2/PI489777)SNP_27587 | 608  | T | C | 3  | 3  | -- | Trihelix     |
| CakTC07052 | Ca(ICC2/PI489777)SNP_27588 | 480  | C | T | 3  | 4  | -- | --           |
|            | Ca(ICC2/PI489777)SNP_27589 | 617  | T | C | 4  | 3  | -- | --           |
| CakTC28965 | Ca(ICC2/PI489777)SNP_27590 | 279  | A | G | 10 | 9  | -- | --           |
| CakTC27503 | Ca(ICC2/PI489777)SNP_27591 | 1439 | T | A | 11 | 4  | -- | C2C2-CO-like |
| CakTC26654 | Ca(ICC2/PI489777)SNP_27592 | 552  | C | T | 5  | 3  | -- | --           |
| CakTC37422 | Ca(ICC2/PI489777)SNP_27593 | 353  | C | T | 5  | 4  | -- | --           |
|            | Ca(ICC2/PI489777)SNP_27594 | 949  | C | G | 9  | 6  | -- | --           |
|            | Ca(ICC2/PI489777)SNP_27595 | 952  | C | T | 9  | 6  | -- | --           |
| CakTC35164 | Ca(ICC2/PI489777)SNP_27596 | 341  | C | A | 9  | 3  | -- | --           |
|            | Ca(ICC2/PI489777)SNP_27597 | 357  | C | T | 9  | 3  | -- | --           |

|            |                            |      |   |   |     |     |        |       |
|------------|----------------------------|------|---|---|-----|-----|--------|-------|
|            | Ca(ICC2/PI489777)SNP_27598 | 392  | A | T | 8   | 4   | --     | --    |
|            | Ca(ICC2/PI489777)SNP_27599 | 394  | T | C | 8   | 4   | --     | --    |
|            | Ca(ICC2/PI489777)SNP_27600 | 432  | A | G | 7   | 4   | --     | --    |
|            | Ca(ICC2/PI489777)SNP_27601 | 567  | A | G | 11  | 7   | --     | --    |
|            | Ca(ICC2/PI489777)SNP_27602 | 582  | G | A | 12  | 7   | --     | --    |
|            | Ca(ICC2/PI489777)SNP_27603 | 627  | A | C | 10  | 7   | --     | --    |
|            | Ca(ICC2/PI489777)SNP_27604 | 642  | G | A | 15  | 6   | --     | --    |
| CakTC35913 | Ca(ICC2/PI489777)SNP_27605 | 1114 | A | G | 42  | 4   | --     | --    |
|            | Ca(ICC2/PI489777)SNP_27606 | 2353 | A | G | 17  | 4   | --     | --    |
|            | Ca(ICC2/PI489777)SNP_27607 | 2481 | G | A | 9   | 5   | --     | --    |
|            | Ca(ICC2/PI489777)SNP_27608 | 2512 | G | A | 11  | 6   | --     | --    |
| CakTC12578 | Ca(ICC2/PI489777)SNP_27609 | 1246 | A | C | 10  | 6   | --     | --    |
| CakTC32275 | Ca(ICC2/PI489777)SNP_27610 | 1488 | A | G | 8   | 5   | Flower | bud   |
| CakTC34985 | Ca(ICC2/PI489777)SNP_27611 | 282  | G | A | 5   | 13  | --     | --    |
|            | Ca(ICC2/PI489777)SNP_27612 | 304  | C | G | 4   | 15  | --     | --    |
| CakTC42900 | Ca(ICC2/PI489777)SNP_27613 | 202  | T | C | 14  | 6   | --     | --    |
|            | Ca(ICC2/PI489777)SNP_27614 | 303  | C | G | 21  | 13  | --     | --    |
|            | Ca(ICC2/PI489777)SNP_27615 | 317  | G | T | 21  | 13  | --     | --    |
|            | Ca(ICC2/PI489777)SNP_27616 | 1742 | G | A | 4   | 13  | --     | --    |
| CakTC37458 | Ca(ICC2/PI489777)SNP_27617 | 922  | C | T | 9   | 3   | --     | --    |
| CakTC26474 | Ca(ICC2/PI489777)SNP_27618 | 517  | G | T | 27  | 20  | --     | --    |
|            | Ca(ICC2/PI489777)SNP_27619 | 586  | T | C | 15  | 20  | --     | --    |
|            | Ca(ICC2/PI489777)SNP_27620 | 823  | T | C | 51  | 22  | --     | --    |
|            | Ca(ICC2/PI489777)SNP_27621 | 975  | T | C | 51  | 21  | --     | --    |
|            | Ca(ICC2/PI489777)SNP_27622 | 1000 | C | T | 48  | 20  | --     | --    |
|            | Ca(ICC2/PI489777)SNP_27623 | 1111 | A | T | 38  | 16  | --     | --    |
|            | Ca(ICC2/PI489777)SNP_27624 | 1112 | A | G | 38  | 16  | --     | --    |
| CakTC29809 | Ca(ICC2/PI489777)SNP_27625 | 225  | T | C | 17  | 3   | --     | --    |
|            | Ca(ICC2/PI489777)SNP_27626 | 1210 | C | T | 18  | 5   | --     | --    |
|            | Ca(ICC2/PI489777)SNP_27627 | 1232 | T | C | 18  | 4   | --     | --    |
| CakTC40311 | Ca(ICC2/PI489777)SNP_27628 | 342  | T | G | 41  | 17  | --     | --    |
|            | Ca(ICC2/PI489777)SNP_27629 | 442  | G | A | 44  | 20  | --     | --    |
|            | Ca(ICC2/PI489777)SNP_27630 | 656  | G | C | 38  | 18  | --     | --    |
| CakTC37771 | Ca(ICC2/PI489777)SNP_27631 | 685  | A | T | 8   | 3   | Shoot  | --    |
|            | Ca(ICC2/PI489777)SNP_27632 | 689  | C | G | 8   | 3   | Shoot  | --    |
|            | Ca(ICC2/PI489777)SNP_27633 | 727  | T | C | 5   | 3   | Shoot  | --    |
|            | Ca(ICC2/PI489777)SNP_27634 | 912  | G | C | 5   | 6   | Shoot  | --    |
| CakTC17796 | Ca(ICC2/PI489777)SNP_27635 | 1699 | G | A | 26  | 15  | --     | --    |
| CakTC00959 | Ca(ICC2/PI489777)SNP_27636 | 1207 | C | T | 3   | 4   | --     | mTERF |
|            | Ca(ICC2/PI489777)SNP_27637 | 1252 | C | G | 3   | 4   | --     | mTERF |
|            | Ca(ICC2/PI489777)SNP_27638 | 1261 | T | C | 3   | 3   | --     | mTERF |
| CakTC33105 | Ca(ICC2/PI489777)SNP_27639 | 1840 | A | T | 12  | 8   | --     | --    |
|            | Ca(ICC2/PI489777)SNP_27640 | 2161 | A | G | 4   | 6   | --     | --    |
| CakTC31787 | Ca(ICC2/PI489777)SNP_27641 | 577  | G | C | 3   | 3   | --     | GeBP  |
| CakTC01704 | Ca(ICC2/PI489777)SNP_27642 | 972  | C | T | 7   | 5   | --     | --    |
| CakTC40646 | Ca(ICC2/PI489777)SNP_27643 | 326  | A | G | 72  | 60  | --     | --    |
| CakTC32058 | Ca(ICC2/PI489777)SNP_27644 | 204  | T | C | 5   | 28  | --     | --    |
|            | Ca(ICC2/PI489777)SNP_27645 | 252  | A | C | 6   | 27  | --     | --    |
|            | Ca(ICC2/PI489777)SNP_27646 | 275  | C | A | 7   | 28  | --     | --    |
| CakTC30158 | Ca(ICC2/PI489777)SNP_27647 | 716  | G | A | 3   | 4   | --     | --    |
|            | Ca(ICC2/PI489777)SNP_27648 | 1977 | G | A | 5   | 3   | --     | --    |
| CakTC42523 | Ca(ICC2/PI489777)SNP_27649 | 197  | T | C | 16  | 24  | --     | --    |
|            | Ca(ICC2/PI489777)SNP_27650 | 208  | A | T | 16  | 24  | --     | --    |
|            | Ca(ICC2/PI489777)SNP_27651 | 220  | T | C | 16  | 21  | --     | --    |
|            | Ca(ICC2/PI489777)SNP_27652 | 300  | A | G | 18  | 24  | --     | --    |
|            | Ca(ICC2/PI489777)SNP_27653 | 342  | T | G | 20  | 23  | --     | --    |
|            | Ca(ICC2/PI489777)SNP_27654 | 1319 | T | C | 17  | 32  | --     | --    |
|            | Ca(ICC2/PI489777)SNP_27655 | 1459 | G | C | 16  | 19  | --     | --    |
|            | Ca(ICC2/PI489777)SNP_27656 | 1525 | T | C | 15  | 19  | --     | --    |
| CakTC31789 | Ca(ICC2/PI489777)SNP_27657 | 409  | C | T | 165 | 107 | --     | --    |
|            | Ca(ICC2/PI489777)SNP_27658 | 493  | G | C | 183 | 102 | --     | --    |
|            | Ca(ICC2/PI489777)SNP_27659 | 1017 | G | C | 18  | 8   | --     | --    |
|            | Ca(ICC2/PI489777)SNP_27660 | 1058 | A | G | 13  | 7   | --     | --    |
| CakTC24539 | Ca(ICC2/PI489777)SNP_27661 | 169  | C | T | 5   | 3   | --     | --    |
|            | Ca(ICC2/PI489777)SNP_27662 | 217  | C | T | 7   | 3   | --     | --    |
|            | Ca(ICC2/PI489777)SNP_27663 | 748  | T | G | 10  | 4   | --     | --    |
|            | Ca(ICC2/PI489777)SNP_27664 | 2929 | C | G | 10  | 3   | --     | --    |
| CakTC40460 | Ca(ICC2/PI489777)SNP_27665 | 1051 | G | A | 5   | 3   | --     | PHD   |
|            | Ca(ICC2/PI489777)SNP_27666 | 2805 | T | A | 17  | 13  | --     | PHD   |
|            | Ca(ICC2/PI489777)SNP_27667 | 2807 | A | G | 16  | 13  | --     | PHD   |
|            | Ca(ICC2/PI489777)SNP_27668 | 3060 | A | C | 22  | 25  | --     | PHD   |
| CakTC34907 | Ca(ICC2/PI489777)SNP_27669 | 945  | C | T | 16  | 9   | --     | SNF2  |
|            | Ca(ICC2/PI489777)SNP_27670 | 3434 | A | G | 5   | 12  | --     | SNF2  |
| CakTC34102 | Ca(ICC2/PI489777)SNP_27671 | 314  | A | G | 5   | 12  | --     | --    |

|            |                            |      |   |   |     |     |    |         |
|------------|----------------------------|------|---|---|-----|-----|----|---------|
| CakTC42666 | Ca(ICC2/PI489777)SNP_27672 | 372  | C | T | 7   | 8   | -- | --      |
| CakTC14366 | Ca(ICC2/PI489777)SNP_27673 | 209  | G | A | 6   | 3   | -- | Jumonji |
| CakTC24210 | Ca(ICC2/PI489777)SNP_27674 | 77   | C | T | 5   | 3   | -- | --      |
|            | Ca(ICC2/PI489777)SNP_27675 | 232  | T | A | 9   | 4   | -- | --      |
|            | Ca(ICC2/PI489777)SNP_27676 | 261  | G | A | 7   | 5   | -- | --      |
|            | Ca(ICC2/PI489777)SNP_27677 | 402  | C | T | 5   | 5   | -- | --      |
| CakTC42104 | Ca(ICC2/PI489777)SNP_27678 | 552  | T | C | 5   | 3   | -- | MYB     |
| CakTC24276 | Ca(ICC2/PI489777)SNP_27679 | 141  | T | A | 5   | 3   | -- | --      |
|            | Ca(ICC2/PI489777)SNP_27680 | 174  | C | A | 4   | 3   | -- | --      |
|            | Ca(ICC2/PI489777)SNP_27681 | 533  | A | C | 10  | 6   | -- | --      |
|            | Ca(ICC2/PI489777)SNP_27682 | 565  | G | C | 10  | 6   | -- | --      |
|            | Ca(ICC2/PI489777)SNP_27683 | 713  | A | G | 23  | 8   | -- | --      |
|            | Ca(ICC2/PI489777)SNP_27684 | 801  | C | T | 26  | 11  | -- | --      |
|            | Ca(ICC2/PI489777)SNP_27685 | 817  | T | C | 21  | 11  | -- | --      |
|            | Ca(ICC2/PI489777)SNP_27686 | 928  | A | G | 49  | 14  | -- | --      |
|            | Ca(ICC2/PI489777)SNP_27687 | 1114 | G | A | 37  | 28  | -- | --      |
|            | Ca(ICC2/PI489777)SNP_27688 | 1184 | T | C | 34  | 26  | -- | --      |
|            | Ca(ICC2/PI489777)SNP_27689 | 1701 | C | A | 9   | 13  | -- | --      |
| CakTC10754 | Ca(ICC2/PI489777)SNP_27690 | 426  | C | T | 23  | 13  | -- | --      |
|            | Ca(ICC2/PI489777)SNP_27691 | 846  | A | G | 9   | 9   | -- | --      |
|            | Ca(ICC2/PI489777)SNP_27692 | 1047 | A | T | 7   | 5   | -- | --      |
|            | Ca(ICC2/PI489777)SNP_27693 | 1107 | A | C | 8   | 9   | -- | --      |
|            | Ca(ICC2/PI489777)SNP_27694 | 1710 | T | C | 3   | 3   | -- | --      |
| CakTC37451 | Ca(ICC2/PI489777)SNP_27695 | 205  | C | T | 13  | 19  | -- | --      |
|            | Ca(ICC2/PI489777)SNP_27696 | 280  | C | T | 19  | 20  | -- | --      |
|            | Ca(ICC2/PI489777)SNP_27697 | 424  | A | G | 24  | 16  | -- | --      |
|            | Ca(ICC2/PI489777)SNP_27698 | 595  | T | C | 22  | 24  | -- | --      |
|            | Ca(ICC2/PI489777)SNP_27699 | 749  | T | C | 24  | 26  | -- | --      |
|            | Ca(ICC2/PI489777)SNP_27700 | 1054 | T | C | 12  | 24  | -- | --      |
|            | Ca(ICC2/PI489777)SNP_27701 | 1144 | G | A | 17  | 22  | -- | --      |
|            | Ca(ICC2/PI489777)SNP_27702 | 1184 | C | T | 22  | 18  | -- | --      |
|            | Ca(ICC2/PI489777)SNP_27703 | 1396 | C | A | 19  | 15  | -- | --      |
|            | Ca(ICC2/PI489777)SNP_27704 | 1474 | C | T | 18  | 14  | -- | --      |
|            | Ca(ICC2/PI489777)SNP_27705 | 1531 | A | G | 19  | 15  | -- | --      |
|            | Ca(ICC2/PI489777)SNP_27706 | 1582 | T | A | 11  | 9   | -- | --      |
|            | Ca(ICC2/PI489777)SNP_27707 | 1598 | A | G | 10  | 8   | -- | --      |
| CakTC10677 | Ca(ICC2/PI489777)SNP_27708 | 71   | A | C | 3   | 7   | -- | --      |
| CakTC30697 | Ca(ICC2/PI489777)SNP_27709 | 519  | G | A | 5   | 3   | -- | TPR     |
|            | Ca(ICC2/PI489777)SNP_27710 | 643  | T | A | 7   | 4   | -- | TPR     |
|            | Ca(ICC2/PI489777)SNP_27711 | 762  | T | G | 5   | 5   | -- | TPR     |
|            | Ca(ICC2/PI489777)SNP_27712 | 763  | C | T | 6   | 5   | -- | TPR     |
|            | Ca(ICC2/PI489777)SNP_27713 | 785  | G | T | 5   | 4   | -- | TPR     |
|            | Ca(ICC2/PI489777)SNP_27714 | 787  | T | C | 5   | 4   | -- | TPR     |
|            | Ca(ICC2/PI489777)SNP_27715 | 879  | C | T | 3   | 3   | -- | TPR     |
|            | Ca(ICC2/PI489777)SNP_27716 | 901  | T | C | 3   | 3   | -- | TPR     |
| CakTC29378 | Ca(ICC2/PI489777)SNP_27717 | 1023 | A | T | 3   | 3   | -- | --      |
| CakTC28228 | Ca(ICC2/PI489777)SNP_27718 | 561  | A | G | 23  | 13  | -- | --      |
|            | Ca(ICC2/PI489777)SNP_27719 | 615  | G | T | 14  | 13  | -- | --      |
| CakTC26956 | Ca(ICC2/PI489777)SNP_27720 | 550  | C | T | 105 | 103 | -- | --      |
|            | Ca(ICC2/PI489777)SNP_27721 | 733  | C | T | 13  | 5   | -- | --      |
| CakTC25695 | Ca(ICC2/PI489777)SNP_27722 | 1644 | T | C | 9   | 7   | -- | --      |
|            | Ca(ICC2/PI489777)SNP_27723 | 2055 | T | G | 8   | 7   | -- | --      |
| CakTC30184 | Ca(ICC2/PI489777)SNP_27724 | 301  | T | C | 9   | 3   | -- | --      |
|            | Ca(ICC2/PI489777)SNP_27725 | 732  | T | A | 6   | 6   | -- | --      |
|            | Ca(ICC2/PI489777)SNP_27726 | 901  | C | A | 4   | 3   | -- | --      |
| CakTC41209 | Ca(ICC2/PI489777)SNP_27727 | 619  | A | C | 29  | 11  | -- | --      |
|            | Ca(ICC2/PI489777)SNP_27728 | 1570 | A | G | 19  | 11  | -- | --      |
| CakTC23661 | Ca(ICC2/PI489777)SNP_27729 | 138  | G | A | 19  | 15  | -- | --      |
|            | Ca(ICC2/PI489777)SNP_27730 | 1040 | G | T | 41  | 23  | -- | --      |
|            | Ca(ICC2/PI489777)SNP_27731 | 2006 | C | T | 59  | 30  | -- | --      |
| CakTC24248 | Ca(ICC2/PI489777)SNP_27732 | 232  | C | T | 15  | 9   | -- | --      |
|            | Ca(ICC2/PI489777)SNP_27733 | 450  | G | A | 9   | 3   | -- | --      |
|            | Ca(ICC2/PI489777)SNP_27734 | 1373 | C | T | 32  | 27  | -- | --      |
|            | Ca(ICC2/PI489777)SNP_27735 | 1458 | A | C | 9   | 16  | -- | --      |
|            | Ca(ICC2/PI489777)SNP_27736 | 1473 | T | A | 6   | 13  | -- | --      |
| CakTC36588 | Ca(ICC2/PI489777)SNP_27737 | 74   | C | A | 5   | 9   | -- | --      |
|            | Ca(ICC2/PI489777)SNP_27738 | 318  | C | T | 15  | 17  | -- | --      |
| CakTC29968 | Ca(ICC2/PI489777)SNP_27739 | 182  | C | T | 5   | 6   | -- | --      |
|            | Ca(ICC2/PI489777)SNP_27740 | 256  | G | A | 5   | 7   | -- | --      |
|            | Ca(ICC2/PI489777)SNP_27741 | 617  | C | A | 6   | 7   | -- | --      |
|            | Ca(ICC2/PI489777)SNP_27742 | 3989 | G | A | 13  | 3   | -- | --      |
|            | Ca(ICC2/PI489777)SNP_27743 | 4414 | G | C | 15  | 4   | -- | --      |
|            | Ca(ICC2/PI489777)SNP_27744 | 5656 | G | A | 4   | 5   | -- | --      |
|            | Ca(ICC2/PI489777)SNP_27745 | 5665 | G | A | 5   | 4   | -- | --      |

|            |                            |      |   |   |     |    |       |              |
|------------|----------------------------|------|---|---|-----|----|-------|--------------|
|            | Ca(ICC2/PI489777)SNP_27746 | 5756 | G | A | 6   | 4  | --    | --           |
|            | Ca(ICC2/PI489777)SNP_27747 | 6385 | G | A | 3   | 3  | --    | --           |
|            | Ca(ICC2/PI489777)SNP_27748 | 6930 | G | A | 6   | 3  | --    | --           |
| CakTC42050 | Ca(ICC2/PI489777)SNP_27749 | 1082 | A | G | 5   | 5  | Shoot | --           |
|            | Ca(ICC2/PI489777)SNP_27750 | 1660 | G | A | 4   | 7  | Shoot | --           |
| CakTC34807 | Ca(ICC2/PI489777)SNP_27751 | 1319 | T | C | 6   | 3  | --    | --           |
|            | Ca(ICC2/PI489777)SNP_27752 | 1558 | A | G | 4   | 3  | --    | --           |
| CakTC37730 | Ca(ICC2/PI489777)SNP_27753 | 322  | G | T | 33  | 12 | --    | --           |
|            | Ca(ICC2/PI489777)SNP_27754 | 444  | G | T | 29  | 12 | --    | --           |
|            | Ca(ICC2/PI489777)SNP_27755 | 470  | G | A | 39  | 11 | --    | --           |
|            | Ca(ICC2/PI489777)SNP_27756 | 584  | T | A | 28  | 17 | --    | --           |
| CakTC41029 | Ca(ICC2/PI489777)SNP_27757 | 1554 | C | G | 74  | 64 | --    | --           |
| CakTC31811 | Ca(ICC2/PI489777)SNP_27758 | 585  | G | A | 3   | 7  | --    | --           |
|            | Ca(ICC2/PI489777)SNP_27759 | 977  | A | G | 7   | 10 | --    | --           |
| CakTC33842 | Ca(ICC2/PI489777)SNP_27760 | 440  | A | G | 14  | 9  | --    | --           |
|            | Ca(ICC2/PI489777)SNP_27761 | 484  | G | T | 8   | 8  | --    | --           |
| CakTC42544 | Ca(ICC2/PI489777)SNP_27762 | 256  | A | C | 5   | 8  | --    | --           |
| CakTC25228 | Ca(ICC2/PI489777)SNP_27763 | 120  | C | T | 8   | 12 | --    | --           |
|            | Ca(ICC2/PI489777)SNP_27764 | 212  | C | T | 58  | 19 | --    | --           |
|            | Ca(ICC2/PI489777)SNP_27765 | 241  | A | T | 82  | 31 | --    | --           |
|            | Ca(ICC2/PI489777)SNP_27766 | 357  | T | C | 124 | 43 | --    | --           |
|            | Ca(ICC2/PI489777)SNP_27767 | 520  | C | T | 151 | 37 | --    | --           |
|            | Ca(ICC2/PI489777)SNP_27768 | 730  | A | C | 98  | 15 | --    | --           |
|            | Ca(ICC2/PI489777)SNP_27769 | 763  | C | T | 96  | 13 | --    | --           |
|            | Ca(ICC2/PI489777)SNP_27770 | 781  | C | T | 95  | 12 | --    | --           |
|            | Ca(ICC2/PI489777)SNP_27771 | 793  | C | A | 61  | 10 | --    | --           |
|            | Ca(ICC2/PI489777)SNP_27772 | 1222 | G | C | 28  | 3  | --    | --           |
| CakTC35960 | Ca(ICC2/PI489777)SNP_27773 | 1349 | C | T | 24  | 6  | --    | bHLH         |
|            | Ca(ICC2/PI489777)SNP_27774 | 2111 | G | C | 14  | 11 | --    | bHLH         |
| CakTC28112 | Ca(ICC2/PI489777)SNP_27775 | 869  | C | A | 7   | 4  | --    | MYB          |
|            | Ca(ICC2/PI489777)SNP_27776 | 1532 | G | C | 7   | 3  | --    | MYB          |
|            | Ca(ICC2/PI489777)SNP_27777 | 1899 | G | A | 13  | 8  | --    | MYB          |
|            | Ca(ICC2/PI489777)SNP_27778 | 1982 | C | T | 14  | 9  | --    | MYB          |
|            | Ca(ICC2/PI489777)SNP_27779 | 2624 | C | T | 13  | 5  | --    | MYB          |
|            | Ca(ICC2/PI489777)SNP_27780 | 2961 | A | G | 9   | 3  | --    | MYB          |
|            | Ca(ICC2/PI489777)SNP_27781 | 3371 | A | G | 6   | 9  | --    | MYB          |
|            | Ca(ICC2/PI489777)SNP_27782 | 3423 | G | T | 8   | 11 | --    | MYB          |
|            | Ca(ICC2/PI489777)SNP_27783 | 3700 | C | T | 22  | 14 | --    | MYB          |
|            | Ca(ICC2/PI489777)SNP_27784 | 4046 | C | A | 14  | 15 | --    | MYB          |
|            | Ca(ICC2/PI489777)SNP_27785 | 4706 | C | A | 13  | 7  | --    | MYB          |
|            | Ca(ICC2/PI489777)SNP_27786 | 5078 | C | T | 10  | 8  | --    | MYB          |
| CakTC28252 | Ca(ICC2/PI489777)SNP_27787 | 1366 | T | C | 33  | 21 | --    | --           |
| CakTC30626 | Ca(ICC2/PI489777)SNP_27788 | 281  | C | G | 9   | 12 | --    | --           |
|            | Ca(ICC2/PI489777)SNP_27789 | 1035 | A | G | 3   | 5  | --    | --           |
|            | Ca(ICC2/PI489777)SNP_27790 | 1052 | C | G | 3   | 5  | --    | --           |
| CakTC30300 | Ca(ICC2/PI489777)SNP_27791 | 43   | A | T | 4   | 5  | --    | --           |
|            | Ca(ICC2/PI489777)SNP_27792 | 374  | T | C | 12  | 7  | --    | --           |
|            | Ca(ICC2/PI489777)SNP_27793 | 1445 | T | C | 3   | 3  | --    | --           |
|            | Ca(ICC2/PI489777)SNP_27794 | 1793 | G | T | 6   | 3  | --    | --           |
| CakTC39735 | Ca(ICC2/PI489777)SNP_27795 | 359  | A | G | 5   | 3  | --    | --           |
| CakTC24624 | Ca(ICC2/PI489777)SNP_27796 | 4220 | T | C | 4   | 4  | --    | --           |
|            | Ca(ICC2/PI489777)SNP_27797 | 4263 | G | T | 4   | 4  | --    | --           |
| CakTC41899 | Ca(ICC2/PI489777)SNP_27798 | 246  | G | A | 9   | 7  | --    | --           |
|            | Ca(ICC2/PI489777)SNP_27799 | 959  | A | G | 27  | 7  | --    | --           |
|            | Ca(ICC2/PI489777)SNP_27800 | 995  | G | A | 22  | 8  | --    | --           |
|            | Ca(ICC2/PI489777)SNP_27801 | 1256 | C | T | 34  | 14 | --    | --           |
| CakTC41179 | Ca(ICC2/PI489777)SNP_27802 | 612  | A | T | 99  | 10 | --    | --           |
|            | Ca(ICC2/PI489777)SNP_27803 | 636  | A | C | 72  | 8  | --    | --           |
| CakTC11798 | Ca(ICC2/PI489777)SNP_27804 | 400  | G | T | 6   | 6  | --    | --           |
|            | Ca(ICC2/PI489777)SNP_27805 | 892  | C | G | 3   | 4  | --    | --           |
|            | Ca(ICC2/PI489777)SNP_27806 | 1054 | T | G | 6   | 3  | --    | --           |
| CakTC29287 | Ca(ICC2/PI489777)SNP_27807 | 342  | T | C | 6   | 3  | --    | --           |
| CakTC37998 | Ca(ICC2/PI489777)SNP_27808 | 1161 | A | G | 5   | 6  | --    | --           |
| CakTC41066 | Ca(ICC2/PI489777)SNP_27809 | 228  | G | C | 19  | 5  | --    | --           |
| CakTC38997 | Ca(ICC2/PI489777)SNP_27810 | 1196 | T | C | 10  | 7  | --    | WI/SNF-BAF60 |
| CakTC31171 | Ca(ICC2/PI489777)SNP_27811 | 1363 | T | G | 12  | 6  | --    | --           |
|            | Ca(ICC2/PI489777)SNP_27812 | 2301 | C | T | 3   | 8  | --    | --           |
| CakTC33768 | Ca(ICC2/PI489777)SNP_27813 | 570  | C | T | 76  | 52 | --    | --           |
| CakTC33861 | Ca(ICC2/PI489777)SNP_27814 | 325  | A | G | 11  | 11 | --    | --           |
|            | Ca(ICC2/PI489777)SNP_27815 | 333  | C | A | 12  | 10 | --    | --           |
|            | Ca(ICC2/PI489777)SNP_27816 | 1716 | T | C | 17  | 5  | --    | --           |
|            | Ca(ICC2/PI489777)SNP_27817 | 2312 | T | A | 14  | 15 | --    | --           |
| CakTC42267 | Ca(ICC2/PI489777)SNP_27818 | 594  | C | G | 8   | 15 | --    | --           |
| CakTC29044 | Ca(ICC2/PI489777)SNP_27819 | 762  | A | T | 91  | 65 | --    | --           |



|            |                             |      |   |   |     |    |       |      |
|------------|-----------------------------|------|---|---|-----|----|-------|------|
|            | Ca(ICCV2/PI489777)SNP_27820 | 885  | G | A | 104 | 94 | --    | --   |
| CakTC07771 | Ca(ICCV2/PI489777)SNP_27821 | 1213 | T | C | 7   | 5  | --    | --   |
| CakTC26677 | Ca(ICCV2/PI489777)SNP_27822 | 933  | G | A | 16  | 12 | --    | bZIP |
| CakTC39675 | Ca(ICCV2/PI489777)SNP_27823 | 167  | T | C | 8   | 34 | --    | --   |
|            | Ca(ICCV2/PI489777)SNP_27824 | 278  | C | T | 19  | 43 | --    | --   |
|            | Ca(ICCV2/PI489777)SNP_27825 | 551  | G | A | 16  | 25 | --    | --   |
|            | Ca(ICCV2/PI489777)SNP_27826 | 2244 | T | A | 4   | 3  | --    | --   |
| CakTC37206 | Ca(ICCV2/PI489777)SNP_27827 | 923  | T | C | 9   | 8  | --    | --   |
| CakTC23598 | Ca(ICCV2/PI489777)SNP_27828 | 72   | G | A | 12  | 13 | --    | --   |
|            | Ca(ICCV2/PI489777)SNP_27829 | 196  | G | T | 15  | 13 | --    | --   |
|            | Ca(ICCV2/PI489777)SNP_27830 | 361  | T | C | 14  | 9  | --    | --   |
|            | Ca(ICCV2/PI489777)SNP_27831 | 395  | G | A | 13  | 9  | --    | --   |
|            | Ca(ICCV2/PI489777)SNP_27832 | 405  | G | A | 13  | 9  | --    | --   |
|            | Ca(ICCV2/PI489777)SNP_27833 | 487  | G | C | 13  | 5  | --    | --   |
|            | Ca(ICCV2/PI489777)SNP_27834 | 495  | T | A | 14  | 6  | --    | --   |
|            | Ca(ICCV2/PI489777)SNP_27835 | 515  | T | G | 12  | 6  | --    | --   |
|            | Ca(ICCV2/PI489777)SNP_27836 | 633  | C | T | 17  | 10 | --    | --   |
|            | Ca(ICCV2/PI489777)SNP_27837 | 1079 | G | A | 8   | 12 | --    | --   |
| CakTC40489 | Ca(ICCV2/PI489777)SNP_27838 | 303  | A | C | 5   | 3  | --    | --   |
|            | Ca(ICCV2/PI489777)SNP_27839 | 326  | A | G | 5   | 6  | --    | --   |
|            | Ca(ICCV2/PI489777)SNP_27840 | 1116 | T | A | 36  | 8  | --    | --   |
|            | Ca(ICCV2/PI489777)SNP_27841 | 1805 | C | A | 21  | 17 | --    | --   |
|            | Ca(ICCV2/PI489777)SNP_27842 | 1871 | A | T | 16  | 11 | --    | --   |
| CakTC26504 | Ca(ICCV2/PI489777)SNP_27843 | 136  | T | C | 40  | 12 | --    | --   |
| CakTC25585 | Ca(ICCV2/PI489777)SNP_27844 | 621  | C | T | 7   | 7  | --    | TRAF |
|            | Ca(ICCV2/PI489777)SNP_27845 | 669  | G | A | 6   | 6  | --    | TRAF |
| CakTC28829 | Ca(ICCV2/PI489777)SNP_27846 | 155  | C | G | 12  | 6  | --    | --   |
|            | Ca(ICCV2/PI489777)SNP_27847 | 176  | T | G | 13  | 6  | --    | --   |
|            | Ca(ICCV2/PI489777)SNP_27848 | 387  | T | C | 14  | 5  | --    | --   |
|            | Ca(ICCV2/PI489777)SNP_27849 | 801  | G | A | 4   | 15 | --    | --   |
|            | Ca(ICCV2/PI489777)SNP_27850 | 807  | T | G | 4   | 16 | --    | --   |
|            | Ca(ICCV2/PI489777)SNP_27851 | 975  | T | C | 12  | 26 | --    | --   |
|            | Ca(ICCV2/PI489777)SNP_27852 | 1444 | T | C | 3   | 13 | --    | --   |
| CakTC42232 | Ca(ICCV2/PI489777)SNP_27853 | 731  | C | T | 3   | 6  | --    | LIM  |
| CakTC23015 | Ca(ICCV2/PI489777)SNP_27854 | 659  | C | T | 9   | 3  | Shoot | --   |
|            | Ca(ICCV2/PI489777)SNP_27855 | 716  | A | G | 8   | 3  | Shoot | --   |
| CakTC11061 | Ca(ICCV2/PI489777)SNP_27856 | 904  | G | A | 3   | 5  | --    | --   |
|            | Ca(ICCV2/PI489777)SNP_27857 | 939  | A | T | 3   | 7  | --    | --   |
| CakTC39402 | Ca(ICCV2/PI489777)SNP_27858 | 628  | C | G | 36  | 14 | --    | --   |
|            | Ca(ICCV2/PI489777)SNP_27859 | 697  | G | T | 32  | 14 | --    | --   |
|            | Ca(ICCV2/PI489777)SNP_27860 | 1337 | A | G | 20  | 13 | --    | --   |
| CakTC43104 | Ca(ICCV2/PI489777)SNP_27861 | 194  | G | A | 4   | 3  | --    | --   |
|            | Ca(ICCV2/PI489777)SNP_27862 | 909  | A | G | 6   | 7  | --    | --   |
|            | Ca(ICCV2/PI489777)SNP_27863 | 921  | G | A | 6   | 8  | --    | --   |
|            | Ca(ICCV2/PI489777)SNP_27864 | 1755 | T | C | 3   | 3  | --    | --   |
| CakTC28262 | Ca(ICCV2/PI489777)SNP_27865 | 387  | G | A | 11  | 5  | --    | --   |
| CakTC34041 | Ca(ICCV2/PI489777)SNP_27866 | 1006 | T | C | 9   | 15 | --    | GNAT |
|            | Ca(ICCV2/PI489777)SNP_27867 | 1212 | T | G | 10  | 9  | --    | GNAT |
|            | Ca(ICCV2/PI489777)SNP_27868 | 2089 | T | G | 8   | 5  | --    | GNAT |
|            | Ca(ICCV2/PI489777)SNP_27869 | 2188 | C | T | 3   | 3  | --    | GNAT |
|            | Ca(ICCV2/PI489777)SNP_27870 | 2191 | T | A | 3   | 3  | --    | GNAT |
| CakTC36626 | Ca(ICCV2/PI489777)SNP_27871 | 1100 | C | T | 14  | 15 | --    | --   |
|            | Ca(ICCV2/PI489777)SNP_27872 | 1680 | G | C | 16  | 8  | --    | --   |
|            | Ca(ICCV2/PI489777)SNP_27873 | 2063 | C | T | 13  | 16 | --    | --   |
| CakTC25604 | Ca(ICCV2/PI489777)SNP_27874 | 522  | T | C | 11  | 3  | --    | --   |
|            | Ca(ICCV2/PI489777)SNP_27875 | 2231 | G | A | 8   | 5  | --    | --   |
|            | Ca(ICCV2/PI489777)SNP_27876 | 2234 | A | G | 7   | 5  | --    | --   |
|            | Ca(ICCV2/PI489777)SNP_27877 | 2795 | G | A | 6   | 10 | --    | --   |
|            | Ca(ICCV2/PI489777)SNP_27878 | 2839 | A | T | 6   | 10 | --    | --   |
|            | Ca(ICCV2/PI489777)SNP_27879 | 2849 | A | G | 5   | 8  | --    | --   |
| CakTC24677 | Ca(ICCV2/PI489777)SNP_27880 | 587  | A | G | 21  | 14 | --    | --   |
|            | Ca(ICCV2/PI489777)SNP_27881 | 623  | A | G | 26  | 16 | --    | --   |
|            | Ca(ICCV2/PI489777)SNP_27882 | 695  | T | A | 22  | 14 | --    | --   |
| CakTC31315 | Ca(ICCV2/PI489777)SNP_27883 | 257  | G | A | 3   | 7  | --    | --   |
|            | Ca(ICCV2/PI489777)SNP_27884 | 668  | T | G | 13  | 7  | --    | --   |
|            | Ca(ICCV2/PI489777)SNP_27885 | 1050 | G | A | 7   | 6  | --    | --   |
|            | Ca(ICCV2/PI489777)SNP_27886 | 1491 | C | T | 12  | 14 | --    | --   |
|            | Ca(ICCV2/PI489777)SNP_27887 | 2490 | G | A | 5   | 5  | --    | --   |
| CakTC09363 | Ca(ICCV2/PI489777)SNP_27888 | 166  | C | T | 3   | 3  | --    | --   |
|            | Ca(ICCV2/PI489777)SNP_27889 | 313  | T | C | 3   | 3  | --    | --   |
| CakTC42417 | Ca(ICCV2/PI489777)SNP_27890 | 1593 | T | C | 14  | 9  | --    | --   |
| CakTC42774 | Ca(ICCV2/PI489777)SNP_27891 | 667  | G | A | 5   | 7  | --    | --   |
|            | Ca(ICCV2/PI489777)SNP_27892 | 744  | T | A | 7   | 6  | --    | --   |
|            | Ca(ICCV2/PI489777)SNP_27893 | 789  | A | G | 5   | 4  | --    | --   |

|            |                            |      |   |   |    |    |    |      |
|------------|----------------------------|------|---|---|----|----|----|------|
|            | Ca(ICC2/PI489777)SNP_27894 | 798  | T | C | 8  | 4  | -- | --   |
|            | Ca(ICC2/PI489777)SNP_27895 | 954  | G | A | 4  | 5  | -- | --   |
|            | Ca(ICC2/PI489777)SNP_27896 | 975  | T | G | 4  | 6  | -- | --   |
|            | Ca(ICC2/PI489777)SNP_27897 | 1054 | A | G | 5  | 8  | -- | --   |
|            | Ca(ICC2/PI489777)SNP_27898 | 1188 | C | T | 5  | 6  | -- | --   |
|            | Ca(ICC2/PI489777)SNP_27899 | 1239 | G | A | 4  | 5  | -- | --   |
|            | Ca(ICC2/PI489777)SNP_27900 | 1428 | T | G | 9  | 7  | -- | --   |
|            | Ca(ICC2/PI489777)SNP_27901 | 1512 | T | C | 8  | 7  | -- | --   |
|            | Ca(ICC2/PI489777)SNP_27902 | 1566 | C | T | 13 | 6  | -- | --   |
|            | Ca(ICC2/PI489777)SNP_27903 | 1723 | G | T | 10 | 3  | -- | --   |
| CakTC40167 | Ca(ICC2/PI489777)SNP_27904 | 1067 | G | A | 6  | 5  | -- | --   |
| CakTC41238 | Ca(ICC2/PI489777)SNP_27905 | 363  | T | G | 24 | 7  | -- | --   |
|            | Ca(ICC2/PI489777)SNP_27906 | 2198 | T | C | 16 | 3  | -- | --   |
| CakTC12761 | Ca(ICC2/PI489777)SNP_27907 | 288  | C | A | 29 | 15 | -- | WRKY |
|            | Ca(ICC2/PI489777)SNP_27908 | 845  | G | T | 20 | 6  | -- | WRKY |
| CakTC38841 | Ca(ICC2/PI489777)SNP_27909 | 176  | C | T | 7  | 4  | -- | --   |
|            | Ca(ICC2/PI489777)SNP_27910 | 672  | G | A | 9  | 7  | -- | --   |
|            | Ca(ICC2/PI489777)SNP_27911 | 828  | C | A | 3  | 8  | -- | --   |
|            | Ca(ICC2/PI489777)SNP_27912 | 984  | T | A | 6  | 6  | -- | --   |
|            | Ca(ICC2/PI489777)SNP_27913 | 1094 | G | A | 8  | 7  | -- | --   |
|            | Ca(ICC2/PI489777)SNP_27914 | 1110 | T | A | 5  | 7  | -- | --   |
|            | Ca(ICC2/PI489777)SNP_27915 | 1116 | T | G | 5  | 7  | -- | --   |
|            | Ca(ICC2/PI489777)SNP_27916 | 1194 | T | C | 5  | 5  | -- | --   |
| CakTC12522 | Ca(ICC2/PI489777)SNP_27917 | 669  | G | T | 7  | 3  | -- | --   |
| CakTC31795 | Ca(ICC2/PI489777)SNP_27918 | 412  | C | T | 4  | 4  | -- | --   |
|            | Ca(ICC2/PI489777)SNP_27919 | 1187 | T | C | 10 | 10 | -- | --   |
|            | Ca(ICC2/PI489777)SNP_27920 | 1454 | T | C | 23 | 14 | -- | --   |
|            | Ca(ICC2/PI489777)SNP_27921 | 1622 | C | T | 15 | 13 | -- | --   |
|            | Ca(ICC2/PI489777)SNP_27922 | 1646 | C | T | 14 | 13 | -- | --   |
|            | Ca(ICC2/PI489777)SNP_27923 | 1745 | A | T | 10 | 11 | -- | --   |
|            | Ca(ICC2/PI489777)SNP_27924 | 1772 | G | A | 10 | 12 | -- | --   |
|            | Ca(ICC2/PI489777)SNP_27925 | 1877 | G | A | 12 | 11 | -- | --   |
|            | Ca(ICC2/PI489777)SNP_27926 | 2018 | G | A | 11 | 12 | -- | --   |
|            | Ca(ICC2/PI489777)SNP_27927 | 2348 | C | T | 14 | 22 | -- | --   |
|            | Ca(ICC2/PI489777)SNP_27928 | 2408 | C | T | 15 | 22 | -- | --   |
|            | Ca(ICC2/PI489777)SNP_27929 | 2438 | A | C | 16 | 21 | -- | --   |
|            | Ca(ICC2/PI489777)SNP_27930 | 2512 | G | C | 16 | 19 | -- | --   |
|            | Ca(ICC2/PI489777)SNP_27931 | 2624 | A | G | 29 | 11 | -- | --   |
|            | Ca(ICC2/PI489777)SNP_27932 | 2684 | G | A | 30 | 6  | -- | --   |
| CakTC25129 | Ca(ICC2/PI489777)SNP_27933 | 57   | G | C | 4  | 3  | -- | --   |
| CakTC39449 | Ca(ICC2/PI489777)SNP_27934 | 1269 | T | A | 70 | 44 | -- | --   |
|            | Ca(ICC2/PI489777)SNP_27935 | 1277 | G | T | 74 | 39 | -- | --   |
| CakTC08362 | Ca(ICC2/PI489777)SNP_27936 | 1495 | T | C | 3  | 4  | -- | --   |
|            | Ca(ICC2/PI489777)SNP_27937 | 2917 | C | T | 3  | 4  | -- | --   |
|            | Ca(ICC2/PI489777)SNP_27938 | 3535 | C | T | 3  | 4  | -- | --   |
| CakTC39071 | Ca(ICC2/PI489777)SNP_27939 | 712  | C | G | 18 | 9  | -- | NAC  |
|            | Ca(ICC2/PI489777)SNP_27940 | 1034 | G | C | 9  | 4  | -- | NAC  |
|            | Ca(ICC2/PI489777)SNP_27941 | 1135 | G | A | 5  | 4  | -- | NAC  |
| CakTC27516 | Ca(ICC2/PI489777)SNP_27942 | 231  | A | T | 8  | 19 | -- | --   |
|            | Ca(ICC2/PI489777)SNP_27943 | 450  | A | G | 25 | 17 | -- | --   |
|            | Ca(ICC2/PI489777)SNP_27944 | 822  | A | G | 19 | 28 | -- | --   |
|            | Ca(ICC2/PI489777)SNP_27945 | 1329 | G | T | 16 | 5  | -- | --   |
|            | Ca(ICC2/PI489777)SNP_27946 | 1526 | A | C | 16 | 10 | -- | --   |
|            | Ca(ICC2/PI489777)SNP_27947 | 3393 | T | C | 15 | 6  | -- | --   |
|            | Ca(ICC2/PI489777)SNP_27948 | 3408 | G | A | 15 | 6  | -- | --   |
|            | Ca(ICC2/PI489777)SNP_27949 | 3464 | T | C | 13 | 5  | -- | --   |
| CakTC43271 | Ca(ICC2/PI489777)SNP_27950 | 739  | T | C | 10 | 6  | -- | --   |
|            | Ca(ICC2/PI489777)SNP_27951 | 756  | T | C | 6  | 8  | -- | --   |
|            | Ca(ICC2/PI489777)SNP_27952 | 1417 | G | C | 18 | 4  | -- | --   |
| CakTC42239 | Ca(ICC2/PI489777)SNP_27953 | 132  | T | A | 20 | 10 | -- | --   |
|            | Ca(ICC2/PI489777)SNP_27954 | 495  | T | G | 25 | 19 | -- | --   |
|            | Ca(ICC2/PI489777)SNP_27955 | 561  | G | A | 12 | 13 | -- | --   |
|            | Ca(ICC2/PI489777)SNP_27956 | 600  | G | A | 9  | 14 | -- | --   |
| CakTC38862 | Ca(ICC2/PI489777)SNP_27957 | 81   | T | A | 9  | 3  | -- | --   |
| CakTC41724 | Ca(ICC2/PI489777)SNP_27958 | 370  | C | T | 9  | 16 | -- | --   |
|            | Ca(ICC2/PI489777)SNP_27959 | 496  | C | T | 13 | 18 | -- | --   |
| CakTC38041 | Ca(ICC2/PI489777)SNP_27960 | 67   | A | C | 13 | 5  | -- | --   |
|            | Ca(ICC2/PI489777)SNP_27961 | 115  | C | G | 14 | 5  | -- | --   |
|            | Ca(ICC2/PI489777)SNP_27962 | 148  | T | C | 16 | 6  | -- | --   |
|            | Ca(ICC2/PI489777)SNP_27963 | 220  | G | C | 16 | 6  | -- | --   |
|            | Ca(ICC2/PI489777)SNP_27964 | 229  | T | A | 19 | 7  | -- | --   |
|            | Ca(ICC2/PI489777)SNP_27965 | 345  | A | G | 21 | 6  | -- | --   |
|            | Ca(ICC2/PI489777)SNP_27966 | 685  | C | T | 10 | 9  | -- | --   |
|            | Ca(ICC2/PI489777)SNP_27967 | 1126 | C | T | 47 | 34 | -- | --   |

|            |                            |      |   |   |    |    |    |        |
|------------|----------------------------|------|---|---|----|----|----|--------|
|            | Ca(ICC2/PI489777)SNP_27968 | 1139 | T | A | 45 | 31 | -- | --     |
| CakTC31373 | Ca(ICC2/PI489777)SNP_27969 | 442  | T | C | 3  | 6  | -- | --     |
|            | Ca(ICC2/PI489777)SNP_27970 | 484  | C | G | 3  | 5  | -- | --     |
| CakTC30247 | Ca(ICC2/PI489777)SNP_27971 | 364  | T | C | 3  | 3  | -- | --     |
| CakTC40372 | Ca(ICC2/PI489777)SNP_27972 | 169  | T | A | 6  | 4  | -- | --     |
| CakTC35465 | Ca(ICC2/PI489777)SNP_27973 | 4116 | G | A | 19 | 10 | -- | --     |
|            | Ca(ICC2/PI489777)SNP_27974 | 4182 | A | G | 17 | 8  | -- | --     |
| CakTC37351 | Ca(ICC2/PI489777)SNP_27975 | 368  | A | T | 3  | 9  | -- | --     |
|            | Ca(ICC2/PI489777)SNP_27976 | 951  | A | G | 5  | 13 | -- | --     |
|            | Ca(ICC2/PI489777)SNP_27977 | 1290 | T | G | 5  | 15 | -- | --     |
|            | Ca(ICC2/PI489777)SNP_27978 | 1424 | G | A | 5  | 7  | -- | --     |
|            | Ca(ICC2/PI489777)SNP_27979 | 1431 | A | T | 3  | 7  | -- | --     |
| CakTC27071 | Ca(ICC2/PI489777)SNP_27980 | 660  | A | G | 30 | 23 | -- | --     |
| CakTC34751 | Ca(ICC2/PI489777)SNP_27981 | 1181 | G | A | 9  | 7  | -- | --     |
|            | Ca(ICC2/PI489777)SNP_27982 | 1505 | C | T | 12 | 10 | -- | --     |
|            | Ca(ICC2/PI489777)SNP_27983 | 1541 | G | A | 12 | 6  | -- | --     |
| CakTC37482 | Ca(ICC2/PI489777)SNP_27984 | 506  | G | T | 26 | 12 | -- | --     |
|            | Ca(ICC2/PI489777)SNP_27985 | 659  | G | C | 25 | 10 | -- | --     |
|            | Ca(ICC2/PI489777)SNP_27986 | 963  | C | T | 17 | 8  | -- | --     |
|            | Ca(ICC2/PI489777)SNP_27987 | 1004 | T | C | 11 | 6  | -- | --     |
| CakTC38538 | Ca(ICC2/PI489777)SNP_27988 | 92   | C | A | 4  | 4  | -- | --     |
| CakTC07661 | Ca(ICC2/PI489777)SNP_27989 | 104  | G | A | 8  | 4  | -- | ARR-B  |
|            | Ca(ICC2/PI489777)SNP_27990 | 878  | G | A | 14 | 5  | -- | ARR-B  |
|            | Ca(ICC2/PI489777)SNP_27991 | 1100 | A | G | 10 | 12 | -- | ARR-B  |
|            | Ca(ICC2/PI489777)SNP_27992 | 1897 | A | G | 6  | 8  | -- | ARR-B  |
| CakTC34378 | Ca(ICC2/PI489777)SNP_27993 | 1289 | G | A | 7  | 5  | -- | --     |
|            | Ca(ICC2/PI489777)SNP_27994 | 1532 | A | T | 10 | 10 | -- | --     |
|            | Ca(ICC2/PI489777)SNP_27995 | 2066 | A | G | 8  | 6  | -- | --     |
| CakTC26762 | Ca(ICC2/PI489777)SNP_27996 | 327  | A | T | 7  | 7  | -- | RWP-RK |
|            | Ca(ICC2/PI489777)SNP_27997 | 400  | C | G | 6  | 6  | -- | RWP-RK |
|            | Ca(ICC2/PI489777)SNP_27998 | 719  | C | G | 10 | 5  | -- | RWP-RK |
| CakTC37292 | Ca(ICC2/PI489777)SNP_27999 | 276  | A | G | 6  | 3  | -- | --     |
|            | Ca(ICC2/PI489777)SNP_28000 | 1181 | A | C | 7  | 5  | -- | --     |
|            | Ca(ICC2/PI489777)SNP_28001 | 1395 | G | A | 13 | 8  | -- | --     |
|            | Ca(ICC2/PI489777)SNP_28002 | 1641 | C | A | 8  | 4  | -- | --     |
|            | Ca(ICC2/PI489777)SNP_28003 | 1655 | C | T | 8  | 4  | -- | --     |
| CakTC34246 | Ca(ICC2/PI489777)SNP_28004 | 1084 | G | A | 4  | 5  | -- | --     |
| CakTC39823 | Ca(ICC2/PI489777)SNP_28005 | 754  | G | A | 27 | 3  | -- | --     |
|            | Ca(ICC2/PI489777)SNP_28006 | 867  | G | A | 33 | 3  | -- | --     |
| CakTC41521 | Ca(ICC2/PI489777)SNP_28007 | 349  | T | C | 13 | 12 | -- | GRAS   |
|            | Ca(ICC2/PI489777)SNP_28008 | 467  | T | C | 19 | 16 | -- | GRAS   |
|            | Ca(ICC2/PI489777)SNP_28009 | 577  | C | A | 15 | 15 | -- | GRAS   |
|            | Ca(ICC2/PI489777)SNP_28010 | 752  | C | T | 26 | 18 | -- | GRAS   |
|            | Ca(ICC2/PI489777)SNP_28011 | 932  | A | G | 35 | 19 | -- | GRAS   |
|            | Ca(ICC2/PI489777)SNP_28012 | 1085 | A | G | 32 | 16 | -- | GRAS   |
|            | Ca(ICC2/PI489777)SNP_28013 | 1214 | G | T | 35 | 22 | -- | GRAS   |
|            | Ca(ICC2/PI489777)SNP_28014 | 1415 | G | C | 16 | 16 | -- | GRAS   |
|            | Ca(ICC2/PI489777)SNP_28015 | 2285 | G | C | 23 | 7  | -- | GRAS   |
| CakTC29553 | Ca(ICC2/PI489777)SNP_28016 | 483  | T | A | 16 | 7  | -- | --     |
|            | Ca(ICC2/PI489777)SNP_28017 | 873  | A | G | 28 | 10 | -- | --     |
|            | Ca(ICC2/PI489777)SNP_28018 | 1113 | A | G | 21 | 11 | -- | --     |
|            | Ca(ICC2/PI489777)SNP_28019 | 1197 | C | A | 18 | 11 | -- | --     |
|            | Ca(ICC2/PI489777)SNP_28020 | 1248 | A | C | 11 | 10 | -- | --     |
| CakTC38794 | Ca(ICC2/PI489777)SNP_28021 | 49   | A | G | 8  | 8  | -- | --     |
|            | Ca(ICC2/PI489777)SNP_28022 | 529  | C | T | 9  | 5  | -- | --     |
| CakTC39793 | Ca(ICC2/PI489777)SNP_28023 | 515  | A | G | 5  | 3  | -- | --     |
| CakTC31065 | Ca(ICC2/PI489777)SNP_28024 | 785  | A | G | 3  | 5  | -- | --     |
| CakTC42672 | Ca(ICC2/PI489777)SNP_28025 | 428  | T | C | 18 | 22 | -- | --     |
|            | Ca(ICC2/PI489777)SNP_28026 | 575  | C | T | 13 | 11 | -- | --     |
|            | Ca(ICC2/PI489777)SNP_28027 | 688  | T | G | 7  | 6  | -- | --     |
| CakTC37720 | Ca(ICC2/PI489777)SNP_28028 | 132  | T | C | 41 | 28 | -- | Tify   |
|            | Ca(ICC2/PI489777)SNP_28029 | 151  | T | G | 43 | 34 | -- | Tify   |
|            | Ca(ICC2/PI489777)SNP_28030 | 226  | T | C | 63 | 56 | -- | Tify   |
|            | Ca(ICC2/PI489777)SNP_28031 | 957  | G | A | 16 | 5  | -- | Tify   |
| CakTC40801 | Ca(ICC2/PI489777)SNP_28032 | 104  | C | T | 10 | 10 | -- | --     |
|            | Ca(ICC2/PI489777)SNP_28033 | 153  | C | T | 12 | 11 | -- | --     |
|            | Ca(ICC2/PI489777)SNP_28034 | 552  | T | C | 17 | 17 | -- | --     |
|            | Ca(ICC2/PI489777)SNP_28035 | 1052 | G | A | 7  | 7  | -- | --     |
|            | Ca(ICC2/PI489777)SNP_28036 | 1076 | T | C | 4  | 10 | -- | --     |
|            | Ca(ICC2/PI489777)SNP_28037 | 1082 | C | T | 4  | 10 | -- | --     |
|            | Ca(ICC2/PI489777)SNP_28038 | 1741 | C | A | 10 | 8  | -- | --     |
| CakTC36245 | Ca(ICC2/PI489777)SNP_28039 | 344  | A | G | 14 | 17 | -- | --     |
| CakTC38314 | Ca(ICC2/PI489777)SNP_28040 | 648  | A | G | 9  | 5  | -- | --     |
| CakTC24379 | Ca(ICC2/PI489777)SNP_28041 | 1290 | C | T | 36 | 9  | -- | --     |

|            |                            |      |   |   |     |    |           |    |
|------------|----------------------------|------|---|---|-----|----|-----------|----|
| CakTC26378 | Ca(ICC2/PI489777)SNP_28042 | 442  | A | C | 19  | 4  | --        | -- |
|            | Ca(ICC2/PI489777)SNP_28043 | 478  | T | C | 25  | 4  | --        | -- |
|            | Ca(ICC2/PI489777)SNP_28044 | 502  | T | C | 24  | 8  | --        | -- |
|            | Ca(ICC2/PI489777)SNP_28045 | 523  | C | A | 20  | 8  | --        | -- |
| CakTC42042 | Ca(ICC2/PI489777)SNP_28046 | 748  | G | A | 24  | 21 | --        | -- |
|            | Ca(ICC2/PI489777)SNP_28047 | 1090 | T | C | 19  | 12 | --        | -- |
|            | Ca(ICC2/PI489777)SNP_28048 | 1252 | G | A | 19  | 14 | --        | -- |
| CakTC42512 | Ca(ICC2/PI489777)SNP_28049 | 411  | T | C | 3   | 9  | Young_pod | -- |
| CakTC31576 | Ca(ICC2/PI489777)SNP_28050 | 291  | T | G | 5   | 5  | --        | -- |
| CakTC33976 | Ca(ICC2/PI489777)SNP_28051 | 1654 | A | T | 15  | 18 | --        | -- |
| CakTC33137 | Ca(ICC2/PI489777)SNP_28052 | 1252 | G | C | 16  | 12 | --        | -- |
| CakTC38545 | Ca(ICC2/PI489777)SNP_28053 | 393  | A | G | 6   | 3  | --        | -- |
|            | Ca(ICC2/PI489777)SNP_28054 | 558  | C | A | 6   | 6  | --        | -- |
|            | Ca(ICC2/PI489777)SNP_28055 | 1006 | A | G | 10  | 5  | --        | -- |
|            | Ca(ICC2/PI489777)SNP_28056 | 1029 | A | G | 7   | 5  | --        | -- |
| CakTC23716 | Ca(ICC2/PI489777)SNP_28057 | 343  | C | T | 5   | 7  | --        | -- |
|            | Ca(ICC2/PI489777)SNP_28058 | 722  | T | C | 104 | 23 | --        | -- |
|            | Ca(ICC2/PI489777)SNP_28059 | 1168 | T | C | 42  | 21 | --        | -- |
|            | Ca(ICC2/PI489777)SNP_28060 | 1658 | T | A | 30  | 5  | --        | -- |
|            | Ca(ICC2/PI489777)SNP_28061 | 1812 | A | T | 21  | 7  | --        | -- |
|            | Ca(ICC2/PI489777)SNP_28062 | 1813 | A | G | 21  | 7  | --        | -- |
|            | Ca(ICC2/PI489777)SNP_28063 | 1851 | G | A | 6   | 4  | --        | -- |
| CakTC27232 | Ca(ICC2/PI489777)SNP_28064 | 968  | A | G | 8   | 3  | --        | -- |
|            | Ca(ICC2/PI489777)SNP_28065 | 1038 | C | A | 5   | 3  | --        | -- |
|            | Ca(ICC2/PI489777)SNP_28066 | 1464 | G | A | 10  | 3  | --        | -- |
| CakTC30759 | Ca(ICC2/PI489777)SNP_28067 | 242  | T | G | 10  | 5  | --        | -- |
|            | Ca(ICC2/PI489777)SNP_28068 | 868  | T | C | 11  | 6  | --        | -- |
|            | Ca(ICC2/PI489777)SNP_28069 | 2484 | A | G | 4   | 3  | --        | -- |
|            | Ca(ICC2/PI489777)SNP_28070 | 4762 | C | T | 8   | 8  | --        | -- |
| CakTC37604 | Ca(ICC2/PI489777)SNP_28071 | 147  | C | G | 28  | 17 | --        | -- |
|            | Ca(ICC2/PI489777)SNP_28072 | 149  | T | C | 28  | 16 | --        | -- |
|            | Ca(ICC2/PI489777)SNP_28073 | 162  | C | T | 28  | 10 | --        | -- |
| CakTC13150 | Ca(ICC2/PI489777)SNP_28074 | 870  | C | T | 9   | 6  | --        | -- |
|            | Ca(ICC2/PI489777)SNP_28075 | 1091 | C | T | 4   | 9  | --        | -- |
| CakTC36222 | Ca(ICC2/PI489777)SNP_28076 | 918  | G | A | 36  | 8  | --        | -- |
|            | Ca(ICC2/PI489777)SNP_28077 | 930  | C | T | 34  | 9  | --        | -- |
|            | Ca(ICC2/PI489777)SNP_28078 | 951  | G | A | 34  | 9  | --        | -- |
|            | Ca(ICC2/PI489777)SNP_28079 | 1047 | G | A | 29  | 10 | --        | -- |
|            | Ca(ICC2/PI489777)SNP_28080 | 1207 | A | G | 22  | 6  | --        | -- |
|            | Ca(ICC2/PI489777)SNP_28081 | 1289 | A | T | 14  | 4  | --        | -- |
|            | Ca(ICC2/PI489777)SNP_28082 | 1369 | C | T | 29  | 4  | --        | -- |
|            | Ca(ICC2/PI489777)SNP_28083 | 1374 | A | G | 23  | 4  | --        | -- |
|            | Ca(ICC2/PI489777)SNP_28084 | 1701 | C | T | 34  | 4  | --        | -- |
|            | Ca(ICC2/PI489777)SNP_28085 | 1912 | A | G | 24  | 4  | --        | -- |
|            | Ca(ICC2/PI489777)SNP_28086 | 1914 | A | G | 24  | 4  | --        | -- |
|            | Ca(ICC2/PI489777)SNP_28087 | 2088 | G | T | 16  | 5  | --        | -- |
|            | Ca(ICC2/PI489777)SNP_28088 | 2167 | T | C | 17  | 9  | --        | -- |
|            | Ca(ICC2/PI489777)SNP_28089 | 2191 | A | C | 17  | 11 | --        | -- |
|            | Ca(ICC2/PI489777)SNP_28090 | 2227 | C | T | 18  | 10 | --        | -- |
|            | Ca(ICC2/PI489777)SNP_28091 | 2377 | C | T | 16  | 11 | --        | -- |
|            | Ca(ICC2/PI489777)SNP_28092 | 2455 | A | G | 20  | 13 | --        | -- |
|            | Ca(ICC2/PI489777)SNP_28093 | 2476 | T | C | 18  | 13 | --        | -- |
|            | Ca(ICC2/PI489777)SNP_28094 | 3007 | G | A | 8   | 3  | --        | -- |
| CakTC24772 | Ca(ICC2/PI489777)SNP_28095 | 1850 | A | G | 16  | 4  | --        | -- |
| CakTC12773 | Ca(ICC2/PI489777)SNP_28096 | 578  | C | T | 8   | 4  | --        | -- |
|            | Ca(ICC2/PI489777)SNP_28097 | 593  | A | G | 7   | 4  | --        | -- |
|            | Ca(ICC2/PI489777)SNP_28098 | 606  | A | G | 8   | 4  | --        | -- |
| CakTC22240 | Ca(ICC2/PI489777)SNP_28099 | 201  | G | A | 3   | 4  | --        | -- |
|            | Ca(ICC2/PI489777)SNP_28100 | 316  | G | A | 9   | 5  | --        | -- |
|            | Ca(ICC2/PI489777)SNP_28101 | 385  | G | A | 9   | 4  | --        | -- |
|            | Ca(ICC2/PI489777)SNP_28102 | 400  | A | G | 9   | 4  | --        | -- |
|            | Ca(ICC2/PI489777)SNP_28103 | 418  | C | T | 11  | 4  | --        | -- |
|            | Ca(ICC2/PI489777)SNP_28104 | 423  | A | C | 10  | 4  | --        | -- |
|            | Ca(ICC2/PI489777)SNP_28105 | 487  | C | T | 9   | 3  | --        | -- |
| CakTC42628 | Ca(ICC2/PI489777)SNP_28106 | 1412 | T | A | 7   | 3  | --        | -- |
| CakTC40921 | Ca(ICC2/PI489777)SNP_28107 | 647  | A | G | 24  | 9  | --        | -- |
|            | Ca(ICC2/PI489777)SNP_28108 | 842  | G | A | 17  | 8  | --        | -- |
|            | Ca(ICC2/PI489777)SNP_28109 | 982  | G | A | 12  | 6  | --        | -- |
|            | Ca(ICC2/PI489777)SNP_28110 | 1069 | C | T | 10  | 5  | --        | -- |
| CakTC38347 | Ca(ICC2/PI489777)SNP_28111 | 1114 | G | T | 14  | 3  | --        | -- |
|            | Ca(ICC2/PI489777)SNP_28112 | 1269 | G | A | 8   | 5  | --        | -- |
| CakTC27116 | Ca(ICC2/PI489777)SNP_28113 | 1776 | T | C | 6   | 3  | --        | -- |
| CakTC36417 | Ca(ICC2/PI489777)SNP_28114 | 31   | G | T | 20  | 7  | --        | -- |
|            | Ca(ICC2/PI489777)SNP_28115 | 39   | C | T | 27  | 7  | --        | -- |

|            |                            |      |   |   |    |    |       |      |
|------------|----------------------------|------|---|---|----|----|-------|------|
|            | Ca(ICC2/PI489777)SNP_28116 | 60   | A | G | 29 | 6  | --    | --   |
|            | Ca(ICC2/PI489777)SNP_28117 | 216  | A | G | 33 | 8  | --    | --   |
|            | Ca(ICC2/PI489777)SNP_28118 | 405  | T | C | 27 | 7  | --    | --   |
| CakTC28680 | Ca(ICC2/PI489777)SNP_28119 | 1589 | C | T | 7  | 4  | --    | --   |
|            | Ca(ICC2/PI489777)SNP_28120 | 2328 | T | A | 4  | 4  | --    | --   |
| CakTC26022 | Ca(ICC2/PI489777)SNP_28121 | 883  | C | A | 17 | 9  | --    | --   |
|            | Ca(ICC2/PI489777)SNP_28122 | 1042 | C | T | 25 | 21 | --    | --   |
|            | Ca(ICC2/PI489777)SNP_28123 | 1770 | T | C | 19 | 11 | --    | --   |
|            | Ca(ICC2/PI489777)SNP_28124 | 1848 | C | T | 25 | 12 | --    | --   |
|            | Ca(ICC2/PI489777)SNP_28125 | 1945 | G | A | 25 | 11 | --    | --   |
|            | Ca(ICC2/PI489777)SNP_28126 | 2013 | A | G | 25 | 10 | --    | --   |
|            | Ca(ICC2/PI489777)SNP_28127 | 2021 | A | G | 24 | 9  | --    | --   |
|            | Ca(ICC2/PI489777)SNP_28128 | 2071 | T | A | 18 | 6  | --    | --   |
|            | Ca(ICC2/PI489777)SNP_28129 | 2610 | C | A | 14 | 6  | --    | --   |
|            | Ca(ICC2/PI489777)SNP_28130 | 2769 | C | T | 15 | 5  | --    | --   |
|            | Ca(ICC2/PI489777)SNP_28131 | 2797 | G | C | 12 | 4  | --    | --   |
| CakTC25176 | Ca(ICC2/PI489777)SNP_28132 | 1291 | C | T | 15 | 3  | --    | --   |
|            | Ca(ICC2/PI489777)SNP_28133 | 1324 | C | T | 14 | 3  | --    | --   |
|            | Ca(ICC2/PI489777)SNP_28134 | 2076 | G | A | 10 | 5  | --    | --   |
|            | Ca(ICC2/PI489777)SNP_28135 | 2435 | T | C | 12 | 6  | --    | --   |
|            | Ca(ICC2/PI489777)SNP_28136 | 2440 | A | T | 13 | 5  | --    | --   |
|            | Ca(ICC2/PI489777)SNP_28137 | 2653 | C | T | 15 | 3  | --    | --   |
|            | Ca(ICC2/PI489777)SNP_28138 | 2865 | G | A | 17 | 9  | --    | --   |
|            | Ca(ICC2/PI489777)SNP_28139 | 3048 | G | A | 19 | 5  | --    | --   |
|            | Ca(ICC2/PI489777)SNP_28140 | 3087 | A | G | 17 | 4  | --    | --   |
| CakTC27125 | Ca(ICC2/PI489777)SNP_28141 | 1374 | C | T | 10 | 4  | Shoot | --   |
| CakTC26461 | Ca(ICC2/PI489777)SNP_28142 | 77   | G | A | 8  | 6  | --    | --   |
|            | Ca(ICC2/PI489777)SNP_28143 | 289  | T | G | 9  | 6  | --    | --   |
|            | Ca(ICC2/PI489777)SNP_28144 | 450  | A | T | 17 | 10 | --    | --   |
| CakTC27905 | Ca(ICC2/PI489777)SNP_28145 | 77   | A | G | 4  | 3  | --    | --   |
|            | Ca(ICC2/PI489777)SNP_28146 | 689  | T | C | 10 | 6  | --    | --   |
| CakTC11094 | Ca(ICC2/PI489777)SNP_28147 | 385  | T | A | 14 | 5  | --    | GRAS |
| CakTC42094 | Ca(ICC2/PI489777)SNP_28148 | 1072 | A | C | 5  | 5  | --    | --   |
|            | Ca(ICC2/PI489777)SNP_28149 | 1720 | A | C | 3  | 3  | --    | --   |
|            | Ca(ICC2/PI489777)SNP_28150 | 1766 | A | G | 4  | 6  | --    | --   |
|            | Ca(ICC2/PI489777)SNP_28151 | 1828 | G | A | 5  | 6  | --    | --   |
| CakTC37353 | Ca(ICC2/PI489777)SNP_28152 | 313  | A | G | 14 | 19 | --    | --   |
| CakTC23001 | Ca(ICC2/PI489777)SNP_28153 | 336  | T | C | 9  | 4  | --    | --   |
| CakTC27833 | Ca(ICC2/PI489777)SNP_28154 | 1523 | C | T | 12 | 5  | --    | --   |
|            | Ca(ICC2/PI489777)SNP_28155 | 1914 | C | T | 10 | 7  | --    | --   |
|            | Ca(ICC2/PI489777)SNP_28156 | 2583 | A | C | 6  | 7  | --    | --   |
| CakTC37299 | Ca(ICC2/PI489777)SNP_28157 | 934  | C | T | 5  | 37 | --    | --   |
| CakTC39570 | Ca(ICC2/PI489777)SNP_28158 | 121  | T | G | 3  | 4  | --    | --   |
|            | Ca(ICC2/PI489777)SNP_28159 | 540  | T | C | 16 | 3  | --    | --   |
|            | Ca(ICC2/PI489777)SNP_28160 | 727  | A | T | 11 | 4  | --    | --   |
|            | Ca(ICC2/PI489777)SNP_28161 | 736  | A | G | 11 | 6  | --    | --   |
|            | Ca(ICC2/PI489777)SNP_28162 | 739  | G | C | 10 | 6  | --    | --   |
|            | Ca(ICC2/PI489777)SNP_28163 | 761  | T | C | 11 | 5  | --    | --   |
| CakTC43198 | Ca(ICC2/PI489777)SNP_28164 | 526  | A | C | 5  | 4  | Shoot | MYB  |
| CakTC32335 | Ca(ICC2/PI489777)SNP_28165 | 1435 | T | C | 5  | 3  | --    | --   |
| CakTC09778 | Ca(ICC2/PI489777)SNP_28166 | 196  | T | G | 3  | 4  | --    | --   |
|            | Ca(ICC2/PI489777)SNP_28167 | 460  | G | T | 10 | 8  | --    | --   |
|            | Ca(ICC2/PI489777)SNP_28168 | 489  | C | T | 10 | 8  | --    | --   |
|            | Ca(ICC2/PI489777)SNP_28169 | 1663 | A | G | 8  | 8  | --    | --   |
| CakTC23725 | Ca(ICC2/PI489777)SNP_28170 | 235  | A | G | 8  | 5  | --    | --   |
|            | Ca(ICC2/PI489777)SNP_28171 | 409  | C | T | 12 | 9  | --    | --   |
|            | Ca(ICC2/PI489777)SNP_28172 | 952  | A | G | 4  | 5  | --    | --   |
|            | Ca(ICC2/PI489777)SNP_28173 | 1237 | T | C | 4  | 4  | --    | --   |
| CakTC37516 | Ca(ICC2/PI489777)SNP_28174 | 454  | A | C | 3  | 4  | --    | --   |
|            | Ca(ICC2/PI489777)SNP_28175 | 1340 | C | T | 4  | 7  | --    | --   |
|            | Ca(ICC2/PI489777)SNP_28176 | 1580 | T | C | 3  | 5  | --    | --   |
| CakTC34598 | Ca(ICC2/PI489777)SNP_28177 | 1453 | C | T | 23 | 10 | --    | --   |
|            | Ca(ICC2/PI489777)SNP_28178 | 1533 | T | A | 27 | 12 | --    | --   |
| CakTC18906 | Ca(ICC2/PI489777)SNP_28179 | 649  | T | A | 6  | 8  | --    | --   |
| CakTC37625 | Ca(ICC2/PI489777)SNP_28180 | 795  | C | T | 12 | 12 | --    | --   |
|            | Ca(ICC2/PI489777)SNP_28181 | 1068 | G | A | 4  | 5  | --    | --   |
| CakTC38290 | Ca(ICC2/PI489777)SNP_28182 | 85   | T | C | 80 | 20 | --    | --   |
| CakTC35564 | Ca(ICC2/PI489777)SNP_28183 | 187  | T | C | 6  | 7  | --    | --   |
|            | Ca(ICC2/PI489777)SNP_28184 | 189  | T | A | 6  | 5  | --    | --   |
|            | Ca(ICC2/PI489777)SNP_28185 | 758  | G | T | 41 | 19 | --    | --   |
|            | Ca(ICC2/PI489777)SNP_28186 | 773  | G | C | 41 | 19 | --    | --   |
|            | Ca(ICC2/PI489777)SNP_28187 | 1001 | A | T | 30 | 12 | --    | --   |
|            | Ca(ICC2/PI489777)SNP_28188 | 1270 | C | T | 34 | 21 | --    | --   |
|            | Ca(ICC2/PI489777)SNP_28189 | 1385 | G | A | 33 | 20 | --    | --   |

|            |                            |      |   |   |     |    |           |          |
|------------|----------------------------|------|---|---|-----|----|-----------|----------|
|            | Ca(ICC2/PI489777)SNP_28190 | 1673 | C | T | 26  | 27 | --        | --       |
|            | Ca(ICC2/PI489777)SNP_28191 | 2819 | A | G | 29  | 14 | --        | --       |
|            | Ca(ICC2/PI489777)SNP_28192 | 3236 | C | T | 39  | 14 | --        | --       |
|            | Ca(ICC2/PI489777)SNP_28193 | 3491 | G | A | 28  | 14 | --        | --       |
|            | Ca(ICC2/PI489777)SNP_28194 | 3500 | G | A | 27  | 11 | --        | --       |
|            | Ca(ICC2/PI489777)SNP_28195 | 3530 | C | T | 30  | 14 | --        | --       |
|            | Ca(ICC2/PI489777)SNP_28196 | 3590 | A | G | 18  | 11 | --        | --       |
|            | Ca(ICC2/PI489777)SNP_28197 | 3701 | T | C | 10  | 19 | --        | --       |
|            | Ca(ICC2/PI489777)SNP_28198 | 3797 | A | G | 14  | 22 | --        | --       |
|            | Ca(ICC2/PI489777)SNP_28199 | 3916 | C | A | 20  | 19 | --        | --       |
|            | Ca(ICC2/PI489777)SNP_28200 | 3953 | A | G | 20  | 19 | --        | --       |
|            | Ca(ICC2/PI489777)SNP_28201 | 4165 | G | A | 16  | 6  | --        | --       |
| CakTC30540 | Ca(ICC2/PI489777)SNP_28202 | 1585 | C | T | 11  | 4  | --        | --       |
| CakTC38059 | Ca(ICC2/PI489777)SNP_28203 | 27   | T | C | 3   | 4  | --        | --       |
|            | Ca(ICC2/PI489777)SNP_28204 | 58   | G | A | 5   | 7  | --        | --       |
| CakTC09650 | Ca(ICC2/PI489777)SNP_28205 | 2484 | A | C | 7   | 4  | --        | --       |
|            | Ca(ICC2/PI489777)SNP_28206 | 2490 | T | A | 7   | 4  | --        | --       |
| CakTC39916 | Ca(ICC2/PI489777)SNP_28207 | 347  | C | T | 80  | 44 | --        | --       |
|            | Ca(ICC2/PI489777)SNP_28208 | 1322 | G | A | 4   | 7  | --        | --       |
| CakTC23382 | Ca(ICC2/PI489777)SNP_28209 | 646  | G | A | 15  | 3  | Root      | bHLH     |
|            | Ca(ICC2/PI489777)SNP_28210 | 1013 | A | G | 24  | 6  | Root      | bHLH     |
|            | Ca(ICC2/PI489777)SNP_28211 | 1016 | G | A | 24  | 6  | Root      | bHLH     |
|            | Ca(ICC2/PI489777)SNP_28212 | 1166 | T | G | 32  | 5  | Root      | bHLH     |
|            | Ca(ICC2/PI489777)SNP_28213 | 1627 | T | C | 25  | 4  | Root      | bHLH     |
| CakTC38133 | Ca(ICC2/PI489777)SNP_28214 | 238  | A | T | 9   | 10 | --        | --       |
| CakTC40186 | Ca(ICC2/PI489777)SNP_28215 | 554  | G | A | 4   | 4  | --        | --       |
| CakTC25637 | Ca(ICC2/PI489777)SNP_28216 | 594  | G | A | 73  | 48 | --        | --       |
|            | Ca(ICC2/PI489777)SNP_28217 | 726  | C | T | 103 | 67 | --        | --       |
|            | Ca(ICC2/PI489777)SNP_28218 | 866  | G | T | 96  | 60 | --        | --       |
| CakTC41247 | Ca(ICC2/PI489777)SNP_28219 | 1006 | C | T | 12  | 6  | --        | --       |
|            | Ca(ICC2/PI489777)SNP_28220 | 1535 | C | G | 14  | 7  | --        | --       |
|            | Ca(ICC2/PI489777)SNP_28221 | 2114 | T | G | 7   | 4  | --        | --       |
|            | Ca(ICC2/PI489777)SNP_28222 | 2324 | A | G | 6   | 3  | --        | --       |
| CakTC43069 | Ca(ICC2/PI489777)SNP_28223 | 68   | A | C | 12  | 10 | --        | --       |
|            | Ca(ICC2/PI489777)SNP_28224 | 148  | T | C | 14  | 12 | --        | --       |
|            | Ca(ICC2/PI489777)SNP_28225 | 241  | G | C | 12  | 12 | --        | --       |
|            | Ca(ICC2/PI489777)SNP_28226 | 245  | C | T | 11  | 13 | --        | --       |
|            | Ca(ICC2/PI489777)SNP_28227 | 257  | T | A | 12  | 11 | --        | --       |
|            | Ca(ICC2/PI489777)SNP_28228 | 320  | C | T | 11  | 9  | --        | --       |
|            | Ca(ICC2/PI489777)SNP_28229 | 467  | C | A | 12  | 3  | --        | --       |
| CakTC41472 | Ca(ICC2/PI489777)SNP_28230 | 220  | C | T | 11  | 3  | --        | --       |
| CakTC32318 | Ca(ICC2/PI489777)SNP_28231 | 1445 | A | G | 3   | 3  | --        | --       |
|            | Ca(ICC2/PI489777)SNP_28232 | 1580 | T | C | 3   | 3  | --        | --       |
| CakTC34671 | Ca(ICC2/PI489777)SNP_28233 | 2217 | G | A | 7   | 4  | --        | --       |
|            | Ca(ICC2/PI489777)SNP_28234 | 3043 | G | T | 7   | 7  | --        | --       |
|            | Ca(ICC2/PI489777)SNP_28235 | 3155 | C | T | 6   | 7  | --        | --       |
|            | Ca(ICC2/PI489777)SNP_28236 | 3358 | T | G | 5   | 4  | --        | --       |
|            | Ca(ICC2/PI489777)SNP_28237 | 3396 | G | T | 7   | 4  | --        | --       |
|            | Ca(ICC2/PI489777)SNP_28238 | 3621 | T | C | 12  | 5  | --        | --       |
| CakTC33883 | Ca(ICC2/PI489777)SNP_28239 | 1735 | C | T | 14  | 6  | --        | --       |
|            | Ca(ICC2/PI489777)SNP_28240 | 1802 | T | A | 14  | 7  | --        | --       |
| CakTC40406 | Ca(ICC2/PI489777)SNP_28241 | 438  | C | T | 51  | 33 | --        | --       |
| CakTC24435 | Ca(ICC2/PI489777)SNP_28242 | 450  | T | A | 69  | 54 | --        | --       |
| CakTC27985 | Ca(ICC2/PI489777)SNP_28243 | 323  | T | C | 14  | 4  | --        | --       |
|            | Ca(ICC2/PI489777)SNP_28244 | 1232 | A | G | 26  | 6  | --        | --       |
|            | Ca(ICC2/PI489777)SNP_28245 | 1556 | A | G | 23  | 10 | --        | --       |
|            | Ca(ICC2/PI489777)SNP_28246 | 1624 | A | G | 25  | 9  | --        | --       |
|            | Ca(ICC2/PI489777)SNP_28247 | 2283 | C | T | 23  | 18 | --        | --       |
| CakTC23131 | Ca(ICC2/PI489777)SNP_28248 | 161  | T | C | 6   | 3  | --        | --       |
| CakTC23931 | Ca(ICC2/PI489777)SNP_28249 | 69   | C | T | 30  | 9  | --        | --       |
|            | Ca(ICC2/PI489777)SNP_28250 | 192  | C | T | 41  | 11 | --        | --       |
| CakTC01101 | Ca(ICC2/PI489777)SNP_28251 | 202  | G | A | 8   | 3  | --        | Trihelix |
|            | Ca(ICC2/PI489777)SNP_28252 | 442  | C | T | 6   | 3  | --        | Trihelix |
|            | Ca(ICC2/PI489777)SNP_28253 | 627  | T | C | 4   | 3  | --        | Trihelix |
| CakTC38146 | Ca(ICC2/PI489777)SNP_28254 | 466  | T | C | 4   | 3  | --        | --       |
|            | Ca(ICC2/PI489777)SNP_28255 | 577  | T | G | 4   | 3  | --        | --       |
| CakTC26093 | Ca(ICC2/PI489777)SNP_28256 | 1592 | C | T | 8   | 6  | --        | Jumonji  |
|            | Ca(ICC2/PI489777)SNP_28257 | 1907 | C | T | 13  | 4  | --        | Jumonji  |
|            | Ca(ICC2/PI489777)SNP_28258 | 1945 | T | C | 12  | 4  | --        | Jumonji  |
|            | Ca(ICC2/PI489777)SNP_28259 | 1965 | T | C | 9   | 6  | --        | Jumonji  |
|            | Ca(ICC2/PI489777)SNP_28260 | 2129 | G | T | 11  | 6  | --        | Jumonji  |
| CakTC42533 | Ca(ICC2/PI489777)SNP_28261 | 883  | A | C | 20  | 4  | --        | --       |
| CakTC10192 | Ca(ICC2/PI489777)SNP_28262 | 141  | T | C | 17  | 8  | --        | --       |
| CakTC23399 | Ca(ICC2/PI489777)SNP_28263 | 358  | C | T | 68  | 23 | Young_pod | --       |

|            |                            |       |   |   |    |    |           |    |
|------------|----------------------------|-------|---|---|----|----|-----------|----|
|            | Ca(ICC2/PI489777)SNP_28264 | 421   | A | G | 44 | 24 | Young_pod | -- |
|            | Ca(ICC2/PI489777)SNP_28265 | 583   | C | T | 47 | 22 | Young_pod | -- |
|            | Ca(ICC2/PI489777)SNP_28266 | 586   | C | A | 48 | 21 | Young_pod | -- |
|            | Ca(ICC2/PI489777)SNP_28267 | 751   | C | T | 39 | 21 | Young_pod | -- |
|            | Ca(ICC2/PI489777)SNP_28268 | 868   | G | A | 37 | 15 | Young_pod | -- |
|            | Ca(ICC2/PI489777)SNP_28269 | 1165  | A | G | 30 | 12 | Young_pod | -- |
|            | Ca(ICC2/PI489777)SNP_28270 | 1174  | T | C | 24 | 13 | Young_pod | -- |
|            | Ca(ICC2/PI489777)SNP_28271 | 1318  | C | T | 20 | 6  | Young_pod | -- |
| CakTC11396 | Ca(ICC2/PI489777)SNP_28272 | 893   | A | G | 35 | 11 | --        | -- |
|            | Ca(ICC2/PI489777)SNP_28273 | 1411  | T | C | 34 | 17 | --        | -- |
|            | Ca(ICC2/PI489777)SNP_28274 | 1418  | A | G | 37 | 18 | --        | -- |
|            | Ca(ICC2/PI489777)SNP_28275 | 1519  | C | A | 30 | 13 | --        | -- |
| CakTC25834 | Ca(ICC2/PI489777)SNP_28276 | 301   | C | G | 50 | 8  | --        | -- |
| CakTC28182 | Ca(ICC2/PI489777)SNP_28277 | 520   | T | G | 13 | 8  | --        | -- |
|            | Ca(ICC2/PI489777)SNP_28278 | 875   | A | C | 12 | 9  | --        | -- |
|            | Ca(ICC2/PI489777)SNP_28279 | 990   | C | T | 21 | 12 | --        | -- |
|            | Ca(ICC2/PI489777)SNP_28280 | 1125  | C | T | 24 | 10 | --        | -- |
| CakTC07342 | Ca(ICC2/PI489777)SNP_28281 | 245   | A | G | 4  | 4  | --        | -- |
| CakTC36837 | Ca(ICC2/PI489777)SNP_28282 | 352   | G | A | 6  | 3  | Shoot     | -- |
|            | Ca(ICC2/PI489777)SNP_28283 | 369   | G | T | 6  | 3  | Shoot     | -- |
| CakTC05310 | Ca(ICC2/PI489777)SNP_28284 | 436   | A | T | 3  | 3  | --        | -- |
|            | Ca(ICC2/PI489777)SNP_28285 | 460   | C | T | 3  | 5  | --        | -- |
|            | Ca(ICC2/PI489777)SNP_28286 | 992   | T | C | 3  | 4  | --        | -- |
|            | Ca(ICC2/PI489777)SNP_28287 | 1039  | T | C | 3  | 7  | --        | -- |
|            | Ca(ICC2/PI489777)SNP_28288 | 1231  | A | C | 7  | 12 | --        | -- |
| CakTC39920 | Ca(ICC2/PI489777)SNP_28289 | 221   | A | G | 22 | 3  | --        | -- |
|            | Ca(ICC2/PI489777)SNP_28290 | 243   | A | C | 21 | 4  | --        | -- |
|            | Ca(ICC2/PI489777)SNP_28291 | 285   | C | G | 20 | 4  | --        | -- |
|            | Ca(ICC2/PI489777)SNP_28292 | 347   | G | C | 39 | 8  | --        | -- |
|            | Ca(ICC2/PI489777)SNP_28293 | 382   | A | G | 43 | 11 | --        | -- |
| CakTC38395 | Ca(ICC2/PI489777)SNP_28294 | 399   | A | G | 22 | 19 | --        | -- |
|            | Ca(ICC2/PI489777)SNP_28295 | 786   | G | A | 47 | 31 | --        | -- |
|            | Ca(ICC2/PI489777)SNP_28296 | 807   | G | A | 46 | 30 | --        | -- |
|            | Ca(ICC2/PI489777)SNP_28297 | 1104  | A | T | 20 | 13 | --        | -- |
| CakTC37004 | Ca(ICC2/PI489777)SNP_28298 | 208   | T | C | 18 | 11 | --        | -- |
|            | Ca(ICC2/PI489777)SNP_28299 | 237   | C | A | 17 | 12 | --        | -- |
|            | Ca(ICC2/PI489777)SNP_28300 | 305   | T | C | 20 | 13 | --        | -- |
|            | Ca(ICC2/PI489777)SNP_28301 | 419   | T | C | 12 | 9  | --        | -- |
|            | Ca(ICC2/PI489777)SNP_28302 | 1082  | T | C | 16 | 4  | --        | -- |
|            | Ca(ICC2/PI489777)SNP_28303 | 1097  | T | C | 13 | 4  | --        | -- |
|            | Ca(ICC2/PI489777)SNP_28304 | 1115  | T | C | 14 | 4  | --        | -- |
|            | Ca(ICC2/PI489777)SNP_28305 | 1202  | C | G | 13 | 4  | --        | -- |
|            | Ca(ICC2/PI489777)SNP_28306 | 1225  | G | C | 13 | 4  | --        | -- |
|            | Ca(ICC2/PI489777)SNP_28307 | 1727  | A | G | 18 | 13 | --        | -- |
| CakTC35521 | Ca(ICC2/PI489777)SNP_28308 | 1871  | T | C | 9  | 4  | --        | -- |
|            | Ca(ICC2/PI489777)SNP_28309 | 2895  | A | T | 6  | 12 | --        | -- |
|            | Ca(ICC2/PI489777)SNP_28310 | 2954  | A | T | 7  | 13 | --        | -- |
|            | Ca(ICC2/PI489777)SNP_28311 | 3195  | T | C | 11 | 7  | --        | -- |
|            | Ca(ICC2/PI489777)SNP_28312 | 3354  | A | T | 8  | 7  | --        | -- |
|            | Ca(ICC2/PI489777)SNP_28313 | 3394  | A | T | 7  | 7  | --        | -- |
| CakTC33992 | Ca(ICC2/PI489777)SNP_28314 | 4188  | T | C | 5  | 5  | --        | -- |
|            | Ca(ICC2/PI489777)SNP_28315 | 4533  | C | T | 7  | 4  | --        | -- |
|            | Ca(ICC2/PI489777)SNP_28316 | 5158  | A | G | 10 | 5  | --        | -- |
|            | Ca(ICC2/PI489777)SNP_28317 | 5163  | G | C | 12 | 5  | --        | -- |
|            | Ca(ICC2/PI489777)SNP_28318 | 5412  | G | T | 12 | 8  | --        | -- |
|            | Ca(ICC2/PI489777)SNP_28319 | 5603  | A | G | 16 | 12 | --        | -- |
|            | Ca(ICC2/PI489777)SNP_28320 | 8264  | T | C | 7  | 4  | --        | -- |
|            | Ca(ICC2/PI489777)SNP_28321 | 8820  | T | C | 14 | 29 | --        | -- |
|            | Ca(ICC2/PI489777)SNP_28322 | 9037  | C | A | 13 | 18 | --        | -- |
|            | Ca(ICC2/PI489777)SNP_28323 | 9972  | T | C | 14 | 4  | --        | -- |
|            | Ca(ICC2/PI489777)SNP_28324 | 10634 | G | A | 19 | 23 | --        | -- |
|            | Ca(ICC2/PI489777)SNP_28325 | 13020 | A | G | 16 | 9  | --        | -- |
|            | Ca(ICC2/PI489777)SNP_28326 | 13067 | A | G | 16 | 5  | --        | -- |
| CakTC26130 | Ca(ICC2/PI489777)SNP_28327 | 243   | T | A | 8  | 14 | --        | -- |
| CakTC38299 | Ca(ICC2/PI489777)SNP_28328 | 397   | G | A | 12 | 9  | --        | -- |
| CakTC27143 | Ca(ICC2/PI489777)SNP_28329 | 1198  | A | G | 3  | 5  | --        | -- |
| CakTC25357 | Ca(ICC2/PI489777)SNP_28330 | 1271  | T | A | 8  | 5  | --        | -- |
| CakTC39583 | Ca(ICC2/PI489777)SNP_28331 | 153   | T | C | 23 | 15 | --        | -- |
|            | Ca(ICC2/PI489777)SNP_28332 | 258   | A | G | 23 | 18 | --        | -- |
|            | Ca(ICC2/PI489777)SNP_28333 | 748   | G | A | 16 | 16 | --        | -- |
| CakTC23112 | Ca(ICC2/PI489777)SNP_28334 | 1006  | C | T | 29 | 23 | --        | -- |
| CakTC42311 | Ca(ICC2/PI489777)SNP_28335 | 189   | T | C | 27 | 25 | --        | -- |
|            | Ca(ICC2/PI489777)SNP_28336 | 292   | C | T | 35 | 25 | --        | -- |
|            | Ca(ICC2/PI489777)SNP_28337 | 430   | A | C | 26 | 28 | --        | -- |

|            |                            |      |   |   |    |    |        |       |
|------------|----------------------------|------|---|---|----|----|--------|-------|
|            | Ca(ICC2/PI489777)SNP_28338 | 493  | C | A | 25 | 24 | --     | --    |
|            | Ca(ICC2/PI489777)SNP_28339 | 645  | A | G | 15 | 14 | --     | --    |
|            | Ca(ICC2/PI489777)SNP_28340 | 742  | A | T | 17 | 12 | --     | --    |
| CakTC42854 | Ca(ICC2/PI489777)SNP_28341 | 528  | T | C | 31 | 30 | --     | CCAAT |
|            | Ca(ICC2/PI489777)SNP_28342 | 556  | C | T | 32 | 17 | --     | CCAAT |
|            | Ca(ICC2/PI489777)SNP_28343 | 610  | C | G | 29 | 4  | --     | CCAAT |
| CakTC42918 | Ca(ICC2/PI489777)SNP_28344 | 65   | T | A | 5  | 4  | --     | --    |
|            | Ca(ICC2/PI489777)SNP_28345 | 410  | C | G | 5  | 6  | --     | --    |
|            | Ca(ICC2/PI489777)SNP_28346 | 426  | C | T | 5  | 5  | --     | --    |
|            | Ca(ICC2/PI489777)SNP_28347 | 707  | A | G | 12 | 5  | --     | --    |
|            | Ca(ICC2/PI489777)SNP_28348 | 812  | T | C | 11 | 4  | --     | --    |
| CakTC11169 | Ca(ICC2/PI489777)SNP_28349 | 182  | G | T | 11 | 4  | Root   | --    |
| CakTC01879 | Ca(ICC2/PI489777)SNP_28350 | 73   | C | G | 8  | 6  | --     | CCAAT |
|            | Ca(ICC2/PI489777)SNP_28351 | 97   | T | G | 8  | 8  | --     | CCAAT |
|            | Ca(ICC2/PI489777)SNP_28352 | 100  | A | C | 8  | 8  | --     | CCAAT |
|            | Ca(ICC2/PI489777)SNP_28353 | 156  | C | A | 9  | 8  | --     | CCAAT |
|            | Ca(ICC2/PI489777)SNP_28354 | 176  | T | G | 9  | 8  | --     | CCAAT |
| CakTC38153 | Ca(ICC2/PI489777)SNP_28355 | 551  | G | A | 13 | 13 | --     | --    |
| CakTC36757 | Ca(ICC2/PI489777)SNP_28356 | 1802 | A | G | 10 | 4  | --     | --    |
| CakTC30859 | Ca(ICC2/PI489777)SNP_28357 | 727  | T | C | 9  | 6  | --     | --    |
|            | Ca(ICC2/PI489777)SNP_28358 | 1983 | A | C | 11 | 3  | --     | --    |
|            | Ca(ICC2/PI489777)SNP_28359 | 2182 | G | T | 6  | 3  | --     | --    |
| CakTC29582 | Ca(ICC2/PI489777)SNP_28360 | 774  | C | G | 12 | 7  | --     | --    |
| CakTC27878 | Ca(ICC2/PI489777)SNP_28361 | 104  | A | G | 9  | 4  | --     | --    |
|            | Ca(ICC2/PI489777)SNP_28362 | 289  | A | C | 6  | 13 | --     | --    |
| CakTC30815 | Ca(ICC2/PI489777)SNP_28363 | 1347 | A | G | 3  | 4  | --     | --    |
|            | Ca(ICC2/PI489777)SNP_28364 | 1732 | C | G | 4  | 3  | --     | --    |
| CakTC31111 | Ca(ICC2/PI489777)SNP_28365 | 376  | C | T | 6  | 5  | --     | --    |
| CakTC31386 | Ca(ICC2/PI489777)SNP_28366 | 1172 | C | T | 5  | 5  | --     | --    |
|            | Ca(ICC2/PI489777)SNP_28367 | 1400 | A | G | 7  | 11 | --     | --    |
| CakTC38741 | Ca(ICC2/PI489777)SNP_28368 | 21   | C | A | 12 | 5  | --     | --    |
|            | Ca(ICC2/PI489777)SNP_28369 | 71   | T | C | 19 | 9  | --     | --    |
|            | Ca(ICC2/PI489777)SNP_28370 | 104  | C | A | 24 | 10 | --     | --    |
|            | Ca(ICC2/PI489777)SNP_28371 | 115  | C | G | 22 | 9  | --     | --    |
|            | Ca(ICC2/PI489777)SNP_28372 | 153  | T | C | 28 | 13 | --     | --    |
|            | Ca(ICC2/PI489777)SNP_28373 | 156  | G | T | 25 | 13 | --     | --    |
|            | Ca(ICC2/PI489777)SNP_28374 | 426  | T | C | 37 | 15 | --     | --    |
|            | Ca(ICC2/PI489777)SNP_28375 | 896  | A | G | 24 | 24 | --     | --    |
|            | Ca(ICC2/PI489777)SNP_28376 | 1058 | T | C | 14 | 16 | --     | --    |
|            | Ca(ICC2/PI489777)SNP_28377 | 1066 | A | C | 15 | 17 | --     | --    |
|            | Ca(ICC2/PI489777)SNP_28378 | 1074 | G | C | 13 | 17 | --     | --    |
|            | Ca(ICC2/PI489777)SNP_28379 | 1089 | G | A | 17 | 16 | --     | --    |
|            | Ca(ICC2/PI489777)SNP_28380 | 1200 | T | A | 17 | 7  | --     | --    |
| CakTC38069 | Ca(ICC2/PI489777)SNP_28381 | 639  | G | A | 17 | 16 | --     | --    |
| CakTC38732 | Ca(ICC2/PI489777)SNP_28382 | 1069 | G | A | 18 | 13 | --     | --    |
| CakTC42812 | Ca(ICC2/PI489777)SNP_28383 | 58   | A | G | 4  | 7  | --     | --    |
|            | Ca(ICC2/PI489777)SNP_28384 | 104  | T | C | 4  | 9  | --     | --    |
|            | Ca(ICC2/PI489777)SNP_28385 | 180  | T | C | 4  | 10 | --     | --    |
|            | Ca(ICC2/PI489777)SNP_28386 | 609  | T | C | 11 | 11 | --     | --    |
|            | Ca(ICC2/PI489777)SNP_28387 | 630  | C | T | 11 | 10 | --     | --    |
| CakTC13554 | Ca(ICC2/PI489777)SNP_28388 | 804  | A | G | 14 | 5  | --     | --    |
| CakTC38881 | Ca(ICC2/PI489777)SNP_28389 | 1415 | T | C | 4  | 4  | --     | --    |
| CakTC34855 | Ca(ICC2/PI489777)SNP_28390 | 418  | C | T | 14 | 8  | --     | --    |
|            | Ca(ICC2/PI489777)SNP_28391 | 487  | G | A | 17 | 9  | --     | --    |
|            | Ca(ICC2/PI489777)SNP_28392 | 617  | G | T | 21 | 10 | --     | --    |
|            | Ca(ICC2/PI489777)SNP_28393 | 790  | A | G | 18 | 8  | --     | --    |
| CakTC38085 | Ca(ICC2/PI489777)SNP_28394 | 122  | G | C | 4  | 3  | --     | --    |
|            | Ca(ICC2/PI489777)SNP_28395 | 1128 | G | A | 4  | 3  | --     | --    |
| CakTC34128 | Ca(ICC2/PI489777)SNP_28396 | 211  | A | G | 11 | 6  | --     | --    |
|            | Ca(ICC2/PI489777)SNP_28397 | 392  | T | A | 14 | 9  | --     | --    |
|            | Ca(ICC2/PI489777)SNP_28398 | 1574 | T | C | 7  | 8  | --     | --    |
| CakTC26090 | Ca(ICC2/PI489777)SNP_28399 | 706  | C | T | 18 | 9  | Flower | bud   |
| CakTC25282 | Ca(ICC2/PI489777)SNP_28400 | 121  | G | C | 39 | 30 | --     | --    |
|            | Ca(ICC2/PI489777)SNP_28401 | 1386 | G | A | 62 | 30 | --     | --    |
|            | Ca(ICC2/PI489777)SNP_28402 | 2583 | A | T | 51 | 14 | --     | --    |
|            | Ca(ICC2/PI489777)SNP_28403 | 2985 | T | A | 40 | 17 | --     | --    |
|            | Ca(ICC2/PI489777)SNP_28404 | 3597 | T | C | 25 | 9  | --     | --    |
|            | Ca(ICC2/PI489777)SNP_28405 | 3700 | A | G | 17 | 9  | --     | --    |
|            | Ca(ICC2/PI489777)SNP_28406 | 3794 | C | T | 16 | 4  | --     | --    |
| CakTC24383 | Ca(ICC2/PI489777)SNP_28407 | 1152 | A | T | 26 | 17 | --     | --    |
|            | Ca(ICC2/PI489777)SNP_28408 | 1295 | T | C | 33 | 16 | --     | --    |
| CakTC29859 | Ca(ICC2/PI489777)SNP_28409 | 2790 | T | C | 5  | 3  | --     | --    |
|            | Ca(ICC2/PI489777)SNP_28410 | 2799 | T | G | 5  | 3  | --     | --    |
| CakTC33918 | Ca(ICC2/PI489777)SNP_28411 | 470  | T | A | 15 | 96 | --     | --    |



|            |                             |      |   |   |    |    |           |      |
|------------|-----------------------------|------|---|---|----|----|-----------|------|
| CakTC32201 | Ca(ICCV2/PI489777)SNP_28412 | 351  | C | T | 4  | 3  | --        | --   |
| CakTC25539 | Ca(ICCV2/PI489777)SNP_28413 | 186  | A | T | 5  | 5  | --        | --   |
| CakTC14132 | Ca(ICCV2/PI489777)SNP_28414 | 325  | G | C | 13 | 5  | --        | --   |
|            | Ca(ICCV2/PI489777)SNP_28415 | 390  | A | G | 14 | 6  | --        | --   |
| CakTC08924 | Ca(ICCV2/PI489777)SNP_28416 | 1641 | C | T | 3  | 6  | --        | --   |
|            | Ca(ICCV2/PI489777)SNP_28417 | 2296 | T | C | 11 | 3  | --        | --   |
|            | Ca(ICCV2/PI489777)SNP_28418 | 3758 | C | T | 3  | 3  | --        | --   |
|            | Ca(ICCV2/PI489777)SNP_28419 | 3788 | T | C | 3  | 3  | --        | --   |
| CakTC42868 | Ca(ICCV2/PI489777)SNP_28420 | 619  | A | G | 6  | 9  | --        | --   |
| CakTC23819 | Ca(ICCV2/PI489777)SNP_28421 | 679  | C | G | 16 | 7  | --        | --   |
| CakTC24114 | Ca(ICCV2/PI489777)SNP_28422 | 1082 | A | G | 10 | 5  | Young_pod | --   |
| CakTC25824 | Ca(ICCV2/PI489777)SNP_28423 | 908  | G | T | 15 | 3  | --        | WRKY |
| CakTC37364 | Ca(ICCV2/PI489777)SNP_28424 | 657  | A | G | 21 | 38 | --        | --   |
|            | Ca(ICCV2/PI489777)SNP_28425 | 677  | T | C | 22 | 34 | --        | --   |
|            | Ca(ICCV2/PI489777)SNP_28426 | 864  | T | C | 13 | 15 | --        | --   |
|            | Ca(ICCV2/PI489777)SNP_28427 | 941  | G | C | 14 | 8  | --        | --   |
|            | Ca(ICCV2/PI489777)SNP_28428 | 958  | A | T | 14 | 8  | --        | --   |
| CakTC30219 | Ca(ICCV2/PI489777)SNP_28429 | 391  | A | T | 5  | 4  | Root      | bZIP |
|            | Ca(ICCV2/PI489777)SNP_28430 | 1090 | G | C | 3  | 4  | Root      | bZIP |
| CakTC25243 | Ca(ICCV2/PI489777)SNP_28431 | 1895 | T | C | 16 | 14 | --        | --   |
|            | Ca(ICCV2/PI489777)SNP_28432 | 2102 | G | A | 18 | 27 | --        | --   |
|            | Ca(ICCV2/PI489777)SNP_28433 | 2732 | A | G | 16 | 21 | --        | --   |
|            | Ca(ICCV2/PI489777)SNP_28434 | 3755 | T | C | 37 | 18 | --        | --   |
|            | Ca(ICCV2/PI489777)SNP_28435 | 4875 | A | G | 11 | 6  | --        | --   |
|            | Ca(ICCV2/PI489777)SNP_28436 | 4943 | G | A | 10 | 5  | --        | --   |
|            | Ca(ICCV2/PI489777)SNP_28437 | 4951 | T | G | 9  | 4  | --        | --   |
| CakTC40667 | Ca(ICCV2/PI489777)SNP_28438 | 93   | A | G | 4  | 4  | --        | --   |
|            | Ca(ICCV2/PI489777)SNP_28439 | 202  | G | A | 11 | 9  | --        | --   |
|            | Ca(ICCV2/PI489777)SNP_28440 | 209  | G | T | 7  | 8  | --        | --   |
| CakTC35129 | Ca(ICCV2/PI489777)SNP_28441 | 2898 | T | C | 12 | 6  | --        | --   |
|            | Ca(ICCV2/PI489777)SNP_28442 | 2971 | A | G | 13 | 8  | --        | --   |
|            | Ca(ICCV2/PI489777)SNP_28443 | 3039 | G | C | 9  | 9  | --        | --   |
|            | Ca(ICCV2/PI489777)SNP_28444 | 3079 | A | T | 8  | 7  | --        | --   |
| CakTC40577 | Ca(ICCV2/PI489777)SNP_28445 | 625  | T | C | 11 | 15 | --        | --   |
|            | Ca(ICCV2/PI489777)SNP_28446 | 1060 | T | C | 13 | 20 | --        | --   |
|            | Ca(ICCV2/PI489777)SNP_28447 | 1070 | T | C | 12 | 18 | --        | --   |
|            | Ca(ICCV2/PI489777)SNP_28448 | 1711 | A | G | 8  | 8  | --        | --   |
|            | Ca(ICCV2/PI489777)SNP_28449 | 1719 | G | T | 9  | 7  | --        | --   |
|            | Ca(ICCV2/PI489777)SNP_28450 | 1737 | C | T | 8  | 7  | --        | --   |
| CakTC39034 | Ca(ICCV2/PI489777)SNP_28451 | 699  | G | T | 4  | 3  | --        | --   |
|            | Ca(ICCV2/PI489777)SNP_28452 | 2046 | T | C | 3  | 16 | --        | --   |
| CakTC36672 | Ca(ICCV2/PI489777)SNP_28453 | 240  | G | A | 3  | 3  | --        | --   |
| CakTC36062 | Ca(ICCV2/PI489777)SNP_28454 | 102  | G | T | 9  | 3  | --        | --   |
|            | Ca(ICCV2/PI489777)SNP_28455 | 169  | G | C | 10 | 3  | --        | --   |
|            | Ca(ICCV2/PI489777)SNP_28456 | 408  | C | T | 6  | 3  | --        | --   |
|            | Ca(ICCV2/PI489777)SNP_28457 | 741  | G | T | 10 | 11 | --        | --   |
|            | Ca(ICCV2/PI489777)SNP_28458 | 1173 | T | A | 10 | 4  | --        | --   |
|            | Ca(ICCV2/PI489777)SNP_28459 | 1515 | C | T | 13 | 11 | --        | --   |
|            | Ca(ICCV2/PI489777)SNP_28460 | 1848 | A | G | 13 | 8  | --        | --   |
|            | Ca(ICCV2/PI489777)SNP_28461 | 2043 | T | C | 12 | 9  | --        | --   |
| CakTC38115 | Ca(ICCV2/PI489777)SNP_28462 | 320  | G | T | 3  | 5  | --        | --   |
|            | Ca(ICCV2/PI489777)SNP_28463 | 330  | C | G | 3  | 5  | --        | --   |
|            | Ca(ICCV2/PI489777)SNP_28464 | 683  | C | T | 6  | 3  | --        | --   |
|            | Ca(ICCV2/PI489777)SNP_28465 | 986  | G | T | 11 | 5  | --        | --   |
|            | Ca(ICCV2/PI489777)SNP_28466 | 1079 | G | C | 12 | 3  | --        | --   |
|            | Ca(ICCV2/PI489777)SNP_28467 | 1131 | G | A | 14 | 5  | --        | --   |
|            | Ca(ICCV2/PI489777)SNP_28468 | 1499 | C | T | 4  | 7  | --        | --   |
| CakTC37816 | Ca(ICCV2/PI489777)SNP_28469 | 494  | G | T | 6  | 3  | --        | NAC  |
| CakTC27887 | Ca(ICCV2/PI489777)SNP_28470 | 729  | G | C | 9  | 3  | --        | --   |
|            | Ca(ICCV2/PI489777)SNP_28471 | 1252 | T | C | 29 | 8  | --        | --   |
| CakTC38061 | Ca(ICCV2/PI489777)SNP_28472 | 451  | C | T | 26 | 11 | --        | --   |
|            | Ca(ICCV2/PI489777)SNP_28473 | 508  | C | T | 29 | 6  | --        | --   |
|            | Ca(ICCV2/PI489777)SNP_28474 | 718  | A | G | 22 | 7  | --        | --   |
|            | Ca(ICCV2/PI489777)SNP_28475 | 850  | G | A | 19 | 9  | --        | --   |
|            | Ca(ICCV2/PI489777)SNP_28476 | 871  | C | T | 16 | 10 | --        | --   |
|            | Ca(ICCV2/PI489777)SNP_28477 | 913  | A | G | 20 | 8  | --        | --   |
| CakTC32973 | Ca(ICCV2/PI489777)SNP_28478 | 208  | C | T | 3  | 4  | --        | --   |
|            | Ca(ICCV2/PI489777)SNP_28479 | 227  | C | T | 5  | 4  | --        | --   |
|            | Ca(ICCV2/PI489777)SNP_28480 | 428  | G | A | 3  | 3  | --        | --   |
|            | Ca(ICCV2/PI489777)SNP_28481 | 443  | A | G | 3  | 3  | --        | --   |
| CakTC31077 | Ca(ICCV2/PI489777)SNP_28482 | 420  | C | T | 5  | 8  | --        | --   |
| CakTC22317 | Ca(ICCV2/PI489777)SNP_28483 | 111  | G | C | 3  | 9  | --        | --   |
|            | Ca(ICCV2/PI489777)SNP_28484 | 236  | C | G | 3  | 5  | --        | --   |
| CakTC42872 | Ca(ICCV2/PI489777)SNP_28485 | 216  | T | C | 30 | 45 | --        | --   |

|            |                            |      |   |   |    |    |        |     |
|------------|----------------------------|------|---|---|----|----|--------|-----|
| CakTC38961 | Ca(ICC2/P1489777)SNP_28486 | 162  | G | A | 23 | 3  | --     | --  |
|            | Ca(ICC2/P1489777)SNP_28487 | 185  | C | A | 20 | 4  | --     | --  |
|            | Ca(ICC2/P1489777)SNP_28488 | 381  | A | T | 16 | 12 | --     | --  |
|            | Ca(ICC2/P1489777)SNP_28489 | 416  | A | G | 17 | 13 | --     | --  |
|            | Ca(ICC2/P1489777)SNP_28490 | 713  | A | G | 21 | 15 | --     | --  |
|            | Ca(ICC2/P1489777)SNP_28491 | 824  | G | A | 34 | 16 | --     | --  |
|            | Ca(ICC2/P1489777)SNP_28492 | 917  | T | C | 27 | 9  | --     | --  |
|            | Ca(ICC2/P1489777)SNP_28493 | 1437 | G | A | 29 | 7  | --     | --  |
|            | Ca(ICC2/P1489777)SNP_28494 | 1459 | G | A | 26 | 7  | --     | --  |
|            | Ca(ICC2/P1489777)SNP_28495 | 1553 | T | A | 8  | 3  | --     | --  |
| CakTC35357 | Ca(ICC2/P1489777)SNP_28496 | 181  | T | A | 4  | 3  | Flower | bud |
|            | Ca(ICC2/P1489777)SNP_28497 | 2373 | G | A | 24 | 7  | Flower | bud |
| CakTC39323 | Ca(ICC2/P1489777)SNP_28498 | 766  | G | A | 16 | 6  | --     | --  |
|            | Ca(ICC2/P1489777)SNP_28499 | 1159 | G | T | 3  | 3  | --     | --  |
|            | Ca(ICC2/P1489777)SNP_28500 | 1319 | A | G | 3  | 4  | --     | --  |
| CakTC36436 | Ca(ICC2/P1489777)SNP_28501 | 1097 | G | A | 93 | 9  | --     | --  |
|            | Ca(ICC2/P1489777)SNP_28502 | 2091 | A | T | 38 | 7  | --     | --  |
| CakTC29944 | Ca(ICC2/P1489777)SNP_28503 | 1406 | G | T | 8  | 3  | --     | --  |
|            | Ca(ICC2/P1489777)SNP_28504 | 2100 | T | C | 9  | 5  | --     | --  |
|            | Ca(ICC2/P1489777)SNP_28505 | 2237 | C | A | 8  | 6  | --     | --  |
|            | Ca(ICC2/P1489777)SNP_28506 | 2774 | G | A | 12 | 6  | --     | --  |
| CakTC11768 | Ca(ICC2/P1489777)SNP_28507 | 104  | A | G | 4  | 5  | --     | --  |
|            | Ca(ICC2/P1489777)SNP_28508 | 160  | C | T | 4  | 4  | --     | --  |
|            | Ca(ICC2/P1489777)SNP_28509 | 631  | G | A | 3  | 3  | --     | --  |
| CakTC38595 | Ca(ICC2/P1489777)SNP_28510 | 1247 | G | A | 5  | 3  | --     | --  |
| CakTC41716 | Ca(ICC2/P1489777)SNP_28511 | 41   | T | C | 22 | 11 | --     | --  |
|            | Ca(ICC2/P1489777)SNP_28512 | 366  | A | G | 39 | 40 | --     | --  |
| CakTC39080 | Ca(ICC2/P1489777)SNP_28513 | 758  | C | T | 30 | 19 | --     | --  |
|            | Ca(ICC2/P1489777)SNP_28514 | 1072 | G | A | 37 | 9  | --     | --  |
| CakTC28998 | Ca(ICC2/P1489777)SNP_28515 | 500  | C | A | 5  | 3  | --     | --  |
|            | Ca(ICC2/P1489777)SNP_28516 | 893  | A | G | 6  | 3  | --     | --  |
|            | Ca(ICC2/P1489777)SNP_28517 | 947  | A | G | 6  | 3  | --     | --  |
|            | Ca(ICC2/P1489777)SNP_28518 | 956  | T | C | 6  | 4  | --     | --  |
|            | Ca(ICC2/P1489777)SNP_28519 | 1305 | G | A | 3  | 4  | --     | --  |
| CakTC25760 | Ca(ICC2/P1489777)SNP_28520 | 42   | C | T | 5  | 3  | --     | --  |
|            | Ca(ICC2/P1489777)SNP_28521 | 793  | T | C | 17 | 5  | --     | --  |
| CakTC28608 | Ca(ICC2/P1489777)SNP_28522 | 693  | A | G | 4  | 5  | --     | --  |
| CakTC27136 | Ca(ICC2/P1489777)SNP_28523 | 586  | A | G | 25 | 10 | --     | --  |
| CakTC42439 | Ca(ICC2/P1489777)SNP_28524 | 88   | T | G | 5  | 3  | --     | --  |
| CakTC35536 | Ca(ICC2/P1489777)SNP_28525 | 411  | C | T | 4  | 4  | --     | --  |
|            | Ca(ICC2/P1489777)SNP_28526 | 459  | C | T | 8  | 5  | --     | --  |
|            | Ca(ICC2/P1489777)SNP_28527 | 812  | T | C | 18 | 12 | --     | --  |
|            | Ca(ICC2/P1489777)SNP_28528 | 950  | A | G | 23 | 22 | --     | --  |
|            | Ca(ICC2/P1489777)SNP_28529 | 1092 | T | G | 23 | 22 | --     | --  |
|            | Ca(ICC2/P1489777)SNP_28530 | 1104 | G | C | 26 | 22 | --     | --  |
|            | Ca(ICC2/P1489777)SNP_28531 | 1209 | T | C | 19 | 17 | --     | --  |
|            | Ca(ICC2/P1489777)SNP_28532 | 1536 | T | A | 25 | 14 | --     | --  |
|            | Ca(ICC2/P1489777)SNP_28533 | 1792 | T | C | 17 | 12 | --     | --  |
|            | Ca(ICC2/P1489777)SNP_28534 | 1926 | C | G | 23 | 10 | --     | --  |
|            | Ca(ICC2/P1489777)SNP_28535 | 2253 | G | A | 13 | 24 | --     | --  |
|            | Ca(ICC2/P1489777)SNP_28536 | 2733 | C | T | 21 | 12 | --     | --  |
|            | Ca(ICC2/P1489777)SNP_28537 | 2978 | T | C | 17 | 8  | --     | --  |
|            | Ca(ICC2/P1489777)SNP_28538 | 3150 | A | G | 11 | 8  | --     | --  |
|            | Ca(ICC2/P1489777)SNP_28539 | 3355 | A | G | 12 | 8  | --     | --  |
|            | Ca(ICC2/P1489777)SNP_28540 | 3529 | A | G | 5  | 5  | --     | --  |
| CakTC32035 | Ca(ICC2/P1489777)SNP_28541 | 5167 | G | A | 16 | 9  | Shoot  | --  |
| CakTC40330 | Ca(ICC2/P1489777)SNP_28542 | 755  | T | G | 52 | 7  | --     | --  |
|            | Ca(ICC2/P1489777)SNP_28543 | 969  | A | G | 41 | 7  | --     | --  |
|            | Ca(ICC2/P1489777)SNP_28544 | 993  | A | G | 32 | 9  | --     | --  |
|            | Ca(ICC2/P1489777)SNP_28545 | 1038 | A | G | 46 | 8  | --     | --  |
|            | Ca(ICC2/P1489777)SNP_28546 | 1218 | G | A | 37 | 8  | --     | --  |
|            | Ca(ICC2/P1489777)SNP_28547 | 1620 | C | G | 54 | 14 | --     | --  |
| CakTC11397 | Ca(ICC2/P1489777)SNP_28548 | 67   | C | G | 4  | 3  | --     | --  |
|            | Ca(ICC2/P1489777)SNP_28549 | 141  | A | G | 4  | 3  | --     | --  |
| CakTC29082 | Ca(ICC2/P1489777)SNP_28550 | 132  | A | T | 3  | 3  | --     | --  |
|            | Ca(ICC2/P1489777)SNP_28551 | 235  | T | G | 3  | 6  | --     | --  |
|            | Ca(ICC2/P1489777)SNP_28552 | 390  | T | C | 9  | 8  | --     | --  |
|            | Ca(ICC2/P1489777)SNP_28553 | 402  | A | G | 6  | 7  | --     | --  |
|            | Ca(ICC2/P1489777)SNP_28554 | 418  | G | T | 6  | 7  | --     | --  |
|            | Ca(ICC2/P1489777)SNP_28555 | 684  | T | A | 6  | 6  | --     | --  |
| CakTC27815 | Ca(ICC2/P1489777)SNP_28556 | 234  | G | A | 6  | 5  | --     | --  |
|            | Ca(ICC2/P1489777)SNP_28557 | 298  | C | T | 5  | 5  | --     | --  |
|            | Ca(ICC2/P1489777)SNP_28558 | 616  | T | C | 7  | 10 | --     | --  |
|            | Ca(ICC2/P1489777)SNP_28559 | 927  | T | C | 9  | 5  | --     | --  |

|            |                            |      |   |   |    |    |    |         |
|------------|----------------------------|------|---|---|----|----|----|---------|
|            | Ca(ICC2/PI489777)SNP_28560 | 1069 | C | G | 9  | 3  | -- | --      |
|            | Ca(ICC2/PI489777)SNP_28561 | 1522 | T | A | 7  | 3  | -- | --      |
|            | Ca(ICC2/PI489777)SNP_28562 | 1620 | A | G | 7  | 3  | -- | --      |
| CakTC03811 | Ca(ICC2/PI489777)SNP_28563 | 1302 | C | G | 3  | 14 | -- | --      |
| CakTC05198 | Ca(ICC2/PI489777)SNP_28564 | 48   | C | T | 4  | 5  | -- | --      |
|            | Ca(ICC2/PI489777)SNP_28565 | 107  | C | A | 5  | 5  | -- | --      |
|            | Ca(ICC2/PI489777)SNP_28566 | 132  | T | A | 4  | 5  | -- | --      |
|            | Ca(ICC2/PI489777)SNP_28567 | 492  | A | T | 6  | 4  | -- | --      |
|            | Ca(ICC2/PI489777)SNP_28568 | 568  | A | G | 8  | 5  | -- | --      |
|            | Ca(ICC2/PI489777)SNP_28569 | 583  | C | T | 9  | 4  | -- | --      |
|            | Ca(ICC2/PI489777)SNP_28570 | 612  | A | T | 10 | 4  | -- | --      |
|            | Ca(ICC2/PI489777)SNP_28571 | 621  | T | C | 10 | 4  | -- | --      |
|            | Ca(ICC2/PI489777)SNP_28572 | 633  | C | G | 10 | 4  | -- | --      |
|            | Ca(ICC2/PI489777)SNP_28573 | 675  | C | A | 10 | 3  | -- | --      |
|            | Ca(ICC2/PI489777)SNP_28574 | 681  | C | T | 10 | 3  | -- | --      |
| CakTC36300 | Ca(ICC2/PI489777)SNP_28575 | 257  | C | G | 8  | 10 | -- | --      |
|            | Ca(ICC2/PI489777)SNP_28576 | 398  | C | T | 14 | 10 | -- | --      |
|            | Ca(ICC2/PI489777)SNP_28577 | 599  | T | C | 16 | 6  | -- | --      |
|            | Ca(ICC2/PI489777)SNP_28578 | 791  | C | T | 5  | 6  | -- | --      |
|            | Ca(ICC2/PI489777)SNP_28579 | 827  | A | G | 3  | 6  | -- | --      |
|            | Ca(ICC2/PI489777)SNP_28580 | 1145 | C | T | 11 | 12 | -- | --      |
|            | Ca(ICC2/PI489777)SNP_28581 | 1214 | A | G | 12 | 11 | -- | --      |
|            | Ca(ICC2/PI489777)SNP_28582 | 1412 | G | A | 13 | 7  | -- | --      |
|            | Ca(ICC2/PI489777)SNP_28583 | 2408 | T | G | 7  | 5  | -- | --      |
|            | Ca(ICC2/PI489777)SNP_28584 | 2456 | A | G | 6  | 4  | -- | --      |
| CakTC42796 | Ca(ICC2/PI489777)SNP_28585 | 337  | A | G | 10 | 5  | -- | --      |
|            | Ca(ICC2/PI489777)SNP_28586 | 433  | A | G | 6  | 6  | -- | --      |
|            | Ca(ICC2/PI489777)SNP_28587 | 443  | G | A | 6  | 7  | -- | --      |
|            | Ca(ICC2/PI489777)SNP_28588 | 476  | G | C | 5  | 7  | -- | --      |
| CakTC12311 | Ca(ICC2/PI489777)SNP_28589 | 81   | C | T | 8  | 7  | -- | --      |
|            | Ca(ICC2/PI489777)SNP_28590 | 180  | C | T | 10 | 8  | -- | --      |
| CakTC37885 | Ca(ICC2/PI489777)SNP_28591 | 697  | T | A | 26 | 8  | -- | --      |
|            | Ca(ICC2/PI489777)SNP_28592 | 803  | A | T | 25 | 14 | -- | --      |
|            | Ca(ICC2/PI489777)SNP_28593 | 869  | A | T | 18 | 14 | -- | --      |
|            | Ca(ICC2/PI489777)SNP_28594 | 878  | T | C | 25 | 13 | -- | --      |
| CakTC35475 | Ca(ICC2/PI489777)SNP_28595 | 367  | G | A | 4  | 8  | -- | --      |
| CakTC26587 | Ca(ICC2/PI489777)SNP_28596 | 168  | C | T | 11 | 5  | -- | --      |
|            | Ca(ICC2/PI489777)SNP_28597 | 254  | G | A | 12 | 5  | -- | --      |
|            | Ca(ICC2/PI489777)SNP_28598 | 258  | G | A | 12 | 5  | -- | --      |
|            | Ca(ICC2/PI489777)SNP_28599 | 437  | C | T | 11 | 7  | -- | --      |
| CakTC26778 | Ca(ICC2/PI489777)SNP_28600 | 322  | A | G | 6  | 3  | -- | --      |
|            | Ca(ICC2/PI489777)SNP_28601 | 498  | G | T | 5  | 4  | -- | --      |
| CakTC36410 | Ca(ICC2/PI489777)SNP_28602 | 1124 | A | G | 7  | 10 | -- | --      |
| CakTC35898 | Ca(ICC2/PI489777)SNP_28603 | 70   | G | A | 5  | 15 | -- | --      |
|            | Ca(ICC2/PI489777)SNP_28604 | 93   | A | G | 4  | 14 | -- | --      |
|            | Ca(ICC2/PI489777)SNP_28605 | 171  | T | A | 16 | 19 | -- | --      |
|            | Ca(ICC2/PI489777)SNP_28606 | 210  | C | T | 23 | 21 | -- | --      |
|            | Ca(ICC2/PI489777)SNP_28607 | 304  | T | G | 27 | 17 | -- | --      |
|            | Ca(ICC2/PI489777)SNP_28608 | 396  | A | G | 29 | 21 | -- | --      |
|            | Ca(ICC2/PI489777)SNP_28609 | 846  | T | G | 15 | 12 | -- | --      |
|            | Ca(ICC2/PI489777)SNP_28610 | 1251 | C | T | 17 | 15 | -- | --      |
|            | Ca(ICC2/PI489777)SNP_28611 | 2289 | G | C | 20 | 13 | -- | --      |
|            | Ca(ICC2/PI489777)SNP_28612 | 3489 | G | A | 7  | 10 | -- | --      |
|            | Ca(ICC2/PI489777)SNP_28613 | 3876 | T | C | 16 | 11 | -- | --      |
|            | Ca(ICC2/PI489777)SNP_28614 | 4683 | T | C | 18 | 11 | -- | --      |
| CakTC33751 | Ca(ICC2/PI489777)SNP_28615 | 671  | T | A | 10 | 25 | -- | --      |
|            | Ca(ICC2/PI489777)SNP_28616 | 849  | A | G | 9  | 9  | -- | --      |
| CakTC41139 | Ca(ICC2/PI489777)SNP_28617 | 794  | A | G | 14 | 5  | -- | --      |
| CakTC42488 | Ca(ICC2/PI489777)SNP_28618 | 459  | C | T | 15 | 6  | -- | --      |
|            | Ca(ICC2/PI489777)SNP_28619 | 728  | A | G | 11 | 6  | -- | --      |
| CakTC33459 | Ca(ICC2/PI489777)SNP_28620 | 670  | T | G | 13 | 12 | -- | --      |
| CakTC31503 | Ca(ICC2/PI489777)SNP_28621 | 485  | A | T | 7  | 7  | -- | Jumonji |
|            | Ca(ICC2/PI489777)SNP_28622 | 519  | C | T | 8  | 7  | -- | Jumonji |
|            | Ca(ICC2/PI489777)SNP_28623 | 594  | C | T | 11 | 8  | -- | Jumonji |
|            | Ca(ICC2/PI489777)SNP_28624 | 840  | T | C | 16 | 6  | -- | Jumonji |
|            | Ca(ICC2/PI489777)SNP_28625 | 1098 | C | T | 9  | 6  | -- | Jumonji |
|            | Ca(ICC2/PI489777)SNP_28626 | 1101 | C | T | 9  | 6  | -- | Jumonji |
|            | Ca(ICC2/PI489777)SNP_28627 | 1113 | C | T | 9  | 6  | -- | Jumonji |
|            | Ca(ICC2/PI489777)SNP_28628 | 1353 | T | C | 7  | 7  | -- | Jumonji |
|            | Ca(ICC2/PI489777)SNP_28629 | 1502 | A | G | 6  | 6  | -- | Jumonji |
|            | Ca(ICC2/PI489777)SNP_28630 | 1734 | C | T | 7  | 6  | -- | Jumonji |
|            | Ca(ICC2/PI489777)SNP_28631 | 2012 | A | G | 14 | 4  | -- | Jumonji |
|            | Ca(ICC2/PI489777)SNP_28632 | 2241 | T | C | 10 | 4  | -- | Jumonji |
|            | Ca(ICC2/PI489777)SNP_28633 | 2286 | C | T | 7  | 3  | -- | Jumonji |

|            |                            |      |   |   |     |     |       |    |
|------------|----------------------------|------|---|---|-----|-----|-------|----|
| CakTC24849 | Ca(ICC2/PI489777)SNP_28634 | 380  | G | A | 187 | 125 | --    | -- |
| CakTC23009 | Ca(ICC2/PI489777)SNP_28635 | 847  | T | C | 17  | 5   | --    | -- |
|            | Ca(ICC2/PI489777)SNP_28636 | 928  | A | C | 17  | 5   | --    | -- |
|            | Ca(ICC2/PI489777)SNP_28637 | 955  | G | A | 16  | 5   | --    | -- |
| CakTC27757 | Ca(ICC2/PI489777)SNP_28638 | 88   | A | T | 13  | 9   | --    | -- |
|            | Ca(ICC2/PI489777)SNP_28639 | 141  | A | C | 18  | 10  | --    | -- |
|            | Ca(ICC2/PI489777)SNP_28640 | 214  | T | A | 38  | 12  | --    | -- |
|            | Ca(ICC2/PI489777)SNP_28641 | 257  | A | G | 26  | 23  | --    | -- |
|            | Ca(ICC2/PI489777)SNP_28642 | 1124 | G | A | 6   | 16  | --    | -- |
|            | Ca(ICC2/PI489777)SNP_28643 | 1137 | C | T | 6   | 20  | --    | -- |
| CakTC14832 | Ca(ICC2/PI489777)SNP_28644 | 390  | C | T | 6   | 7   | Shoot | -- |
|            | Ca(ICC2/PI489777)SNP_28645 | 1341 | C | T | 8   | 5   | Shoot | -- |
| CakTC28528 | Ca(ICC2/PI489777)SNP_28646 | 301  | G | A | 22  | 17  | --    | -- |
|            | Ca(ICC2/PI489777)SNP_28647 | 510  | T | C | 53  | 42  | --    | -- |
| CakTC26620 | Ca(ICC2/PI489777)SNP_28648 | 419  | A | C | 7   | 3   | --    | -- |
|            | Ca(ICC2/PI489777)SNP_28649 | 436  | C | A | 9   | 3   | --    | -- |
|            | Ca(ICC2/PI489777)SNP_28650 | 820  | A | G | 6   | 4   | --    | -- |
|            | Ca(ICC2/PI489777)SNP_28651 | 870  | G | A | 4   | 3   | --    | -- |
| CakTC39462 | Ca(ICC2/PI489777)SNP_28652 | 420  | C | G | 6   | 7   | --    | -- |
|            | Ca(ICC2/PI489777)SNP_28653 | 445  | T | C | 6   | 9   | --    | -- |
|            | Ca(ICC2/PI489777)SNP_28654 | 1045 | T | C | 3   | 3   | --    | -- |
| CakTC36988 | Ca(ICC2/PI489777)SNP_28655 | 3784 | G | A | 15  | 6   | --    | -- |
| CakTC27315 | Ca(ICC2/PI489777)SNP_28656 | 142  | A | G | 20  | 35  | --    | -- |
|            | Ca(ICC2/PI489777)SNP_28657 | 154  | G | C | 20  | 40  | --    | -- |
| CakTC32387 | Ca(ICC2/PI489777)SNP_28658 | 424  | G | A | 31  | 20  | --    | -- |
|            | Ca(ICC2/PI489777)SNP_28659 | 1653 | C | A | 48  | 28  | --    | -- |
|            | Ca(ICC2/PI489777)SNP_28660 | 3526 | G | A | 123 | 43  | --    | -- |
|            | Ca(ICC2/PI489777)SNP_28661 | 3785 | G | A | 52  | 29  | --    | -- |
| CakTC24053 | Ca(ICC2/PI489777)SNP_28662 | 315  | C | A | 31  | 10  | --    | -- |
|            | Ca(ICC2/PI489777)SNP_28663 | 881  | G | A | 50  | 24  | --    | -- |
|            | Ca(ICC2/PI489777)SNP_28664 | 1674 | G | A | 49  | 45  | --    | -- |
|            | Ca(ICC2/PI489777)SNP_28665 | 1696 | C | A | 48  | 59  | --    | -- |
|            | Ca(ICC2/PI489777)SNP_28666 | 1771 | C | T | 63  | 54  | --    | -- |
|            | Ca(ICC2/PI489777)SNP_28667 | 1792 | A | G | 51  | 63  | --    | -- |
|            | Ca(ICC2/PI489777)SNP_28668 | 1804 | T | C | 50  | 54  | --    | -- |
|            | Ca(ICC2/PI489777)SNP_28669 | 1835 | C | T | 52  | 56  | --    | -- |
|            | Ca(ICC2/PI489777)SNP_28670 | 2185 | T | C | 22  | 20  | --    | -- |
| CakTC33482 | Ca(ICC2/PI489777)SNP_28671 | 576  | G | A | 7   | 7   | --    | -- |
| CakTC41743 | Ca(ICC2/PI489777)SNP_28672 | 213  | G | A | 3   | 3   | --    | -- |
|            | Ca(ICC2/PI489777)SNP_28673 | 651  | T | C | 6   | 5   | --    | -- |
| CakTC35429 | Ca(ICC2/PI489777)SNP_28674 | 416  | C | T | 11  | 6   | --    | -- |
|            | Ca(ICC2/PI489777)SNP_28675 | 3497 | G | A | 36  | 18  | --    | -- |
| CakTC39599 | Ca(ICC2/PI489777)SNP_28676 | 894  | A | G | 12  | 28  | --    | -- |
| CakTC42945 | Ca(ICC2/PI489777)SNP_28677 | 171  | C | T | 17  | 13  | --    | -- |
|            | Ca(ICC2/PI489777)SNP_28678 | 357  | A | G | 16  | 21  | --    | -- |
|            | Ca(ICC2/PI489777)SNP_28679 | 600  | T | C | 11  | 28  | --    | -- |
| CakTC26509 | Ca(ICC2/PI489777)SNP_28680 | 1122 | C | T | 17  | 17  | --    | -- |
|            | Ca(ICC2/PI489777)SNP_28681 | 1131 | T | C | 17  | 17  | --    | -- |
|            | Ca(ICC2/PI489777)SNP_28682 | 1632 | G | T | 14  | 7   | --    | -- |
|            | Ca(ICC2/PI489777)SNP_28683 | 3255 | A | G | 20  | 4   | --    | -- |
|            | Ca(ICC2/PI489777)SNP_28684 | 3336 | C | T | 20  | 4   | --    | -- |
| CakTC43139 | Ca(ICC2/PI489777)SNP_28685 | 366  | C | T | 27  | 8   | --    | -- |
|            | Ca(ICC2/PI489777)SNP_28686 | 427  | T | A | 19  | 8   | --    | -- |
| CakTC29172 | Ca(ICC2/PI489777)SNP_28687 | 732  | G | A | 3   | 3   | --    | -- |
| CakTC24754 | Ca(ICC2/PI489777)SNP_28688 | 159  | G | T | 123 | 140 | --    | -- |
|            | Ca(ICC2/PI489777)SNP_28689 | 222  | G | T | 131 | 149 | --    | -- |
|            | Ca(ICC2/PI489777)SNP_28690 | 256  | G | T | 127 | 146 | --    | -- |
| CakTC34774 | Ca(ICC2/PI489777)SNP_28691 | 597  | A | G | 7   | 6   | --    | -- |
|            | Ca(ICC2/PI489777)SNP_28692 | 1322 | T | C | 5   | 7   | --    | -- |
|            | Ca(ICC2/PI489777)SNP_28693 | 1941 | T | A | 16  | 3   | --    | -- |
|            | Ca(ICC2/PI489777)SNP_28694 | 2091 | T | C | 12  | 7   | --    | -- |
|            | Ca(ICC2/PI489777)SNP_28695 | 2732 | T | C | 18  | 8   | --    | -- |
|            | Ca(ICC2/PI489777)SNP_28696 | 2994 | C | G | 15  | 8   | --    | -- |
|            | Ca(ICC2/PI489777)SNP_28697 | 3135 | T | C | 12  | 9   | --    | -- |
| CakTC29450 | Ca(ICC2/PI489777)SNP_28698 | 673  | T | G | 5   | 5   | --    | -- |
|            | Ca(ICC2/PI489777)SNP_28699 | 1569 | G | A | 7   | 5   | --    | -- |
| CakTC38657 | Ca(ICC2/PI489777)SNP_28700 | 210  | G | A | 3   | 5   | --    | -- |
|            | Ca(ICC2/PI489777)SNP_28701 | 1127 | G | C | 79  | 64  | --    | -- |
|            | Ca(ICC2/PI489777)SNP_28702 | 1128 | T | A | 84  | 64  | --    | -- |
| CakTC30389 | Ca(ICC2/PI489777)SNP_28703 | 316  | C | T | 9   | 9   | --    | -- |
|            | Ca(ICC2/PI489777)SNP_28704 | 405  | A | G | 9   | 10  | --    | -- |
|            | Ca(ICC2/PI489777)SNP_28705 | 722  | G | A | 61  | 18  | --    | -- |
|            | Ca(ICC2/PI489777)SNP_28706 | 890  | C | T | 43  | 17  | --    | -- |
|            | Ca(ICC2/PI489777)SNP_28707 | 956  | A | G | 46  | 14  | --    | -- |

|            |                            |      |   |   |    |    |        |      |
|------------|----------------------------|------|---|---|----|----|--------|------|
|            | Ca(ICC2/PI489777)SNP_28708 | 962  | G | A | 56 | 18 | --     | --   |
|            | Ca(ICC2/PI489777)SNP_28709 | 986  | C | T | 56 | 19 | --     | --   |
|            | Ca(ICC2/PI489777)SNP_28710 | 1070 | A | G | 58 | 19 | --     | --   |
|            | Ca(ICC2/PI489777)SNP_28711 | 1470 | A | T | 32 | 17 | --     | --   |
|            | Ca(ICC2/PI489777)SNP_28712 | 1475 | C | A | 30 | 8  | --     | --   |
| CakTC09860 | Ca(ICC2/PI489777)SNP_28713 | 1798 | C | A | 6  | 3  | --     | --   |
|            | Ca(ICC2/PI489777)SNP_28714 | 1799 | T | A | 5  | 3  | --     | --   |
|            | Ca(ICC2/PI489777)SNP_28715 | 1857 | T | C | 7  | 3  | --     | --   |
|            | Ca(ICC2/PI489777)SNP_28716 | 1984 | A | G | 6  | 3  | --     | --   |
| CakTC35435 | Ca(ICC2/PI489777)SNP_28717 | 415  | T | C | 10 | 3  | --     | --   |
|            | Ca(ICC2/PI489777)SNP_28718 | 418  | T | C | 10 | 5  | --     | --   |
|            | Ca(ICC2/PI489777)SNP_28719 | 610  | T | C | 16 | 5  | --     | --   |
|            | Ca(ICC2/PI489777)SNP_28720 | 1306 | G | A | 17 | 11 | --     | --   |
|            | Ca(ICC2/PI489777)SNP_28721 | 1726 | G | C | 15 | 8  | --     | --   |
|            | Ca(ICC2/PI489777)SNP_28722 | 1792 | A | G | 11 | 10 | --     | --   |
|            | Ca(ICC2/PI489777)SNP_28723 | 1801 | A | G | 13 | 9  | --     | --   |
|            | Ca(ICC2/PI489777)SNP_28724 | 1867 | T | C | 17 | 12 | --     | --   |
|            | Ca(ICC2/PI489777)SNP_28725 | 2302 | C | G | 13 | 8  | --     | --   |
|            | Ca(ICC2/PI489777)SNP_28726 | 2617 | T | C | 20 | 4  | --     | --   |
|            | Ca(ICC2/PI489777)SNP_28727 | 2716 | T | C | 16 | 3  | --     | --   |
|            | Ca(ICC2/PI489777)SNP_28728 | 2815 | C | T | 13 | 5  | --     | --   |
|            | Ca(ICC2/PI489777)SNP_28729 | 2839 | T | C | 14 | 3  | --     | --   |
|            | Ca(ICC2/PI489777)SNP_28730 | 2854 | T | A | 13 | 5  | --     | --   |
|            | Ca(ICC2/PI489777)SNP_28731 | 2857 | T | C | 14 | 5  | --     | --   |
|            | Ca(ICC2/PI489777)SNP_28732 | 2943 | C | T | 14 | 7  | --     | --   |
|            | Ca(ICC2/PI489777)SNP_28733 | 2944 | T | G | 14 | 7  | --     | --   |
|            | Ca(ICC2/PI489777)SNP_28734 | 2973 | T | C | 17 | 7  | --     | --   |
|            | Ca(ICC2/PI489777)SNP_28735 | 3072 | T | C | 15 | 6  | --     | --   |
|            | Ca(ICC2/PI489777)SNP_28736 | 3733 | G | T | 11 | 7  | --     | --   |
|            | Ca(ICC2/PI489777)SNP_28737 | 4026 | A | G | 9  | 9  | --     | --   |
|            | Ca(ICC2/PI489777)SNP_28738 | 4110 | A | T | 6  | 8  | --     | --   |
| CakTC33256 | Ca(ICC2/PI489777)SNP_28739 | 85   | C | T | 16 | 3  | --     | --   |
|            | Ca(ICC2/PI489777)SNP_28740 | 196  | C | T | 41 | 5  | --     | --   |
|            | Ca(ICC2/PI489777)SNP_28741 | 230  | C | T | 41 | 5  | --     | --   |
|            | Ca(ICC2/PI489777)SNP_28742 | 342  | T | C | 45 | 5  | --     | --   |
|            | Ca(ICC2/PI489777)SNP_28743 | 414  | T | G | 42 | 5  | --     | --   |
| CakTC40759 | Ca(ICC2/PI489777)SNP_28744 | 130  | C | A | 22 | 8  | --     | --   |
| CakTC13613 | Ca(ICC2/PI489777)SNP_28745 | 333  | C | T | 8  | 7  | --     | --   |
|            | Ca(ICC2/PI489777)SNP_28746 | 339  | C | A | 8  | 6  | --     | --   |
| CakTC37508 | Ca(ICC2/PI489777)SNP_28747 | 1441 | T | C | 4  | 8  | --     | --   |
| CakTC27097 | Ca(ICC2/PI489777)SNP_28748 | 1541 | A | T | 3  | 3  | Shoot  | --   |
| CakTC39067 | Ca(ICC2/PI489777)SNP_28749 | 550  | A | G | 31 | 10 | --     | --   |
|            | Ca(ICC2/PI489777)SNP_28750 | 851  | C | T | 24 | 13 | --     | --   |
|            | Ca(ICC2/PI489777)SNP_28751 | 1195 | C | T | 18 | 8  | --     | --   |
| CakTC29775 | Ca(ICC2/PI489777)SNP_28752 | 77   | G | T | 3  | 6  | Flower | bud  |
|            | Ca(ICC2/PI489777)SNP_28753 | 133  | C | G | 3  | 6  | Flower | bud  |
|            | Ca(ICC2/PI489777)SNP_28754 | 142  | T | C | 3  | 5  | Flower | bud  |
| CakTC00012 | Ca(ICC2/PI489777)SNP_28755 | 170  | T | C | 3  | 8  | --     | --   |
|            | Ca(ICC2/PI489777)SNP_28756 | 181  | G | T | 3  | 8  | --     | --   |
| CakTC27894 | Ca(ICC2/PI489777)SNP_28757 | 1179 | T | C | 3  | 3  | --     | --   |
| CakTC41925 | Ca(ICC2/PI489777)SNP_28758 | 699  | G | A | 3  | 5  | --     | --   |
| CakTC30700 | Ca(ICC2/PI489777)SNP_28759 | 960  | T | C | 61 | 12 | --     | --   |
| CakTC34680 | Ca(ICC2/PI489777)SNP_28760 | 90   | C | T | 7  | 3  | --     | --   |
|            | Ca(ICC2/PI489777)SNP_28761 | 1475 | C | T | 18 | 9  | --     | --   |
|            | Ca(ICC2/PI489777)SNP_28762 | 1502 | T | C | 15 | 9  | --     | --   |
|            | Ca(ICC2/PI489777)SNP_28763 | 2492 | A | G | 7  | 6  | --     | --   |
|            | Ca(ICC2/PI489777)SNP_28764 | 3248 | C | T | 7  | 4  | --     | --   |
|            | Ca(ICC2/PI489777)SNP_28765 | 3281 | C | T | 6  | 4  | --     | --   |
|            | Ca(ICC2/PI489777)SNP_28766 | 3301 | C | G | 6  | 4  | --     | --   |
| CakTC35430 | Ca(ICC2/PI489777)SNP_28767 | 64   | C | G | 8  | 6  | --     | FARI |
| CakTC26647 | Ca(ICC2/PI489777)SNP_28768 | 130  | A | C | 14 | 5  | --     | --   |
|            | Ca(ICC2/PI489777)SNP_28769 | 230  | G | T | 71 | 20 | --     | --   |
|            | Ca(ICC2/PI489777)SNP_28770 | 252  | T | C | 73 | 20 | --     | --   |
|            | Ca(ICC2/PI489777)SNP_28771 | 273  | T | C | 75 | 20 | --     | --   |
|            | Ca(ICC2/PI489777)SNP_28772 | 274  | G | A | 75 | 21 | --     | --   |
|            | Ca(ICC2/PI489777)SNP_28773 | 304  | T | A | 82 | 20 | --     | --   |
|            | Ca(ICC2/PI489777)SNP_28774 | 328  | T | A | 80 | 17 | --     | --   |
|            | Ca(ICC2/PI489777)SNP_28775 | 784  | A | G | 23 | 6  | --     | --   |
| CakTC30488 | Ca(ICC2/PI489777)SNP_28776 | 522  | A | C | 5  | 7  | --     | --   |
|            | Ca(ICC2/PI489777)SNP_28777 | 707  | A | G | 7  | 5  | --     | --   |
| CakTC29939 | Ca(ICC2/PI489777)SNP_28778 | 724  | T | C | 5  | 16 | --     | --   |
|            | Ca(ICC2/PI489777)SNP_28779 | 1227 | C | A | 6  | 11 | --     | --   |
|            | Ca(ICC2/PI489777)SNP_28780 | 1527 | C | T | 5  | 8  | --     | --   |
|            | Ca(ICC2/PI489777)SNP_28781 | 1716 | G | A | 6  | 5  | --     | --   |

|            |                            |      |   |   |    |    |        |     |
|------------|----------------------------|------|---|---|----|----|--------|-----|
|            | Ca(ICC2/PI489777)SNP_28782 | 1860 | G | A | 7  | 4  | --     | --  |
| CakTC43055 | Ca(ICC2/PI489777)SNP_28783 | 753  | T | C | 9  | 6  | --     | --  |
|            | Ca(ICC2/PI489777)SNP_28784 | 894  | A | G | 7  | 5  | --     | --  |
|            | Ca(ICC2/PI489777)SNP_28785 | 921  | T | C | 10 | 5  | --     | --  |
|            | Ca(ICC2/PI489777)SNP_28786 | 969  | C | T | 9  | 5  | --     | --  |
| CakTC38243 | Ca(ICC2/PI489777)SNP_28787 | 256  | C | A | 88 | 39 | --     | --  |
|            | Ca(ICC2/PI489777)SNP_28788 | 295  | A | T | 93 | 39 | --     | --  |
|            | Ca(ICC2/PI489777)SNP_28789 | 938  | C | A | 13 | 12 | --     | --  |
| CakTC32740 | Ca(ICC2/PI489777)SNP_28790 | 279  | T | C | 20 | 19 | --     | --  |
|            | Ca(ICC2/PI489777)SNP_28791 | 886  | G | A | 22 | 31 | --     | --  |
|            | Ca(ICC2/PI489777)SNP_28792 | 1756 | C | T | 25 | 32 | --     | --  |
|            | Ca(ICC2/PI489777)SNP_28793 | 1879 | G | A | 20 | 14 | --     | --  |
| CakTC28237 | Ca(ICC2/PI489777)SNP_28794 | 716  | A | T | 16 | 7  | --     | --  |
|            | Ca(ICC2/PI489777)SNP_28795 | 1154 | T | C | 21 | 27 | --     | --  |
|            | Ca(ICC2/PI489777)SNP_28796 | 1859 | C | A | 27 | 13 | --     | --  |
| CakTC30831 | Ca(ICC2/PI489777)SNP_28797 | 921  | T | C | 4  | 3  | --     | --  |
|            | Ca(ICC2/PI489777)SNP_28798 | 1466 | A | G | 14 | 7  | --     | --  |
|            | Ca(ICC2/PI489777)SNP_28799 | 1584 | C | A | 5  | 5  | --     | --  |
| CakTC42910 | Ca(ICC2/PI489777)SNP_28800 | 1511 | C | A | 9  | 5  | --     | --  |
|            | Ca(ICC2/PI489777)SNP_28801 | 1541 | T | C | 10 | 6  | --     | --  |
|            | Ca(ICC2/PI489777)SNP_28802 | 1803 | C | T | 3  | 8  | --     | --  |
|            | Ca(ICC2/PI489777)SNP_28803 | 1823 | T | C | 3  | 8  | --     | --  |
|            | Ca(ICC2/PI489777)SNP_28804 | 1850 | A | G | 3  | 9  | --     | --  |
| CakTC36498 | Ca(ICC2/PI489777)SNP_28805 | 2480 | G | T | 21 | 5  | --     | --  |
|            | Ca(ICC2/PI489777)SNP_28806 | 2486 | A | T | 17 | 7  | --     | --  |
|            | Ca(ICC2/PI489777)SNP_28807 | 2617 | A | G | 5  | 9  | --     | --  |
|            | Ca(ICC2/PI489777)SNP_28808 | 2631 | C | T | 6  | 9  | --     | --  |
|            | Ca(ICC2/PI489777)SNP_28809 | 2952 | T | C | 14 | 5  | --     | --  |
|            | Ca(ICC2/PI489777)SNP_28810 | 3012 | G | A | 16 | 5  | --     | --  |
| CakTC31538 | Ca(ICC2/PI489777)SNP_28811 | 425  | G | A | 13 | 8  | Flower | bud |
| CakTC25388 | Ca(ICC2/PI489777)SNP_28812 | 127  | G | T | 3  | 3  | --     | --  |
|            | Ca(ICC2/PI489777)SNP_28813 | 440  | T | G | 13 | 3  | --     | --  |
|            | Ca(ICC2/PI489777)SNP_28814 | 1255 | C | T | 8  | 5  | --     | --  |
|            | Ca(ICC2/PI489777)SNP_28815 | 1263 | C | A | 8  | 5  | --     | --  |
|            | Ca(ICC2/PI489777)SNP_28816 | 1447 | G | C | 7  | 9  | --     | --  |
|            | Ca(ICC2/PI489777)SNP_28817 | 1623 | A | T | 3  | 5  | --     | --  |
| CakTC25396 | Ca(ICC2/PI489777)SNP_28818 | 974  | T | C | 9  | 8  | --     | --  |
|            | Ca(ICC2/PI489777)SNP_28819 | 1445 | T | C | 9  | 11 | --     | --  |
|            | Ca(ICC2/PI489777)SNP_28820 | 1636 | C | T | 4  | 6  | --     | --  |
| CakTC38074 | Ca(ICC2/PI489777)SNP_28821 | 113  | G | T | 4  | 3  | --     | --  |
|            | Ca(ICC2/PI489777)SNP_28822 | 353  | G | T | 5  | 7  | --     | --  |
|            | Ca(ICC2/PI489777)SNP_28823 | 362  | A | G | 5  | 7  | --     | --  |
|            | Ca(ICC2/PI489777)SNP_28824 | 761  | T | C | 3  | 9  | --     | --  |
| CakTC43367 | Ca(ICC2/PI489777)SNP_28825 | 515  | T | A | 5  | 4  | --     | --  |
| CakTC27945 | Ca(ICC2/PI489777)SNP_28826 | 666  | A | G | 17 | 20 | --     | TPR |
|            | Ca(ICC2/PI489777)SNP_28827 | 720  | G | A | 15 | 19 | --     | TPR |
|            | Ca(ICC2/PI489777)SNP_28828 | 732  | A | C | 14 | 19 | --     | TPR |
| CakTC40506 | Ca(ICC2/PI489777)SNP_28829 | 51   | G | T | 7  | 13 | --     | --  |
|            | Ca(ICC2/PI489777)SNP_28830 | 56   | C | G | 24 | 17 | --     | --  |
|            | Ca(ICC2/PI489777)SNP_28831 | 496  | T | C | 41 | 45 | --     | --  |
|            | Ca(ICC2/PI489777)SNP_28832 | 595  | G | A | 30 | 24 | --     | --  |
| CakTC34739 | Ca(ICC2/PI489777)SNP_28833 | 198  | T | G | 18 | 8  | --     | --  |
|            | Ca(ICC2/PI489777)SNP_28834 | 562  | C | T | 28 | 11 | --     | --  |
|            | Ca(ICC2/PI489777)SNP_28835 | 564  | A | G | 28 | 11 | --     | --  |
|            | Ca(ICC2/PI489777)SNP_28836 | 835  | G | A | 64 | 9  | --     | --  |
|            | Ca(ICC2/PI489777)SNP_28837 | 847  | A | T | 55 | 8  | --     | --  |
|            | Ca(ICC2/PI489777)SNP_28838 | 907  | A | G | 57 | 11 | --     | --  |
|            | Ca(ICC2/PI489777)SNP_28839 | 2941 | T | C | 63 | 18 | --     | --  |
|            | Ca(ICC2/PI489777)SNP_28840 | 3431 | A | G | 40 | 12 | --     | --  |
| CakTC09923 | Ca(ICC2/PI489777)SNP_28841 | 268  | T | C | 9  | 4  | --     | --  |
|            | Ca(ICC2/PI489777)SNP_28842 | 316  | T | C | 10 | 3  | --     | --  |
|            | Ca(ICC2/PI489777)SNP_28843 | 327  | C | A | 10 | 4  | --     | --  |
| CakTC27603 | Ca(ICC2/PI489777)SNP_28844 | 289  | T | C | 7  | 3  | Root   | --  |
|            | Ca(ICC2/PI489777)SNP_28845 | 594  | A | C | 9  | 9  | Root   | --  |
|            | Ca(ICC2/PI489777)SNP_28846 | 787  | T | C | 6  | 9  | Root   | --  |
| CakTC05777 | Ca(ICC2/PI489777)SNP_28847 | 447  | T | C | 6  | 5  | --     | --  |
|            | Ca(ICC2/PI489777)SNP_28848 | 995  | A | G | 4  | 9  | --     | --  |
| CakTC41414 | Ca(ICC2/PI489777)SNP_28849 | 152  | A | G | 3  | 4  | --     | --  |
|            | Ca(ICC2/PI489777)SNP_28850 | 185  | G | C | 6  | 3  | --     | --  |
|            | Ca(ICC2/PI489777)SNP_28851 | 974  | C | T | 14 | 8  | --     | --  |
|            | Ca(ICC2/PI489777)SNP_28852 | 1616 | C | T | 8  | 7  | --     | --  |
|            | Ca(ICC2/PI489777)SNP_28853 | 1798 | G | A | 7  | 4  | --     | --  |
|            | Ca(ICC2/PI489777)SNP_28854 | 1966 | C | T | 5  | 3  | --     | --  |
| CakTC35884 | Ca(ICC2/PI489777)SNP_28855 | 577  | T | C | 20 | 14 | --     | --  |

|            |                            |      |   |   |     |     |      |      |
|------------|----------------------------|------|---|---|-----|-----|------|------|
|            | Ca(ICC2/PI489777)SNP_28856 | 1903 | G | T | 18  | 15  | --   | --   |
|            | Ca(ICC2/PI489777)SNP_28857 | 1960 | G | T | 23  | 13  | --   | --   |
|            | Ca(ICC2/PI489777)SNP_28858 | 1990 | A | G | 27  | 16  | --   | --   |
|            | Ca(ICC2/PI489777)SNP_28859 | 2117 | A | G | 33  | 16  | --   | --   |
|            | Ca(ICC2/PI489777)SNP_28860 | 2359 | C | T | 43  | 27  | --   | --   |
|            | Ca(ICC2/PI489777)SNP_28861 | 2812 | A | G | 28  | 12  | --   | --   |
| CakTC37836 | Ca(ICC2/PI489777)SNP_28862 | 203  | G | A | 46  | 117 | --   | --   |
|            | Ca(ICC2/PI489777)SNP_28863 | 257  | T | C | 49  | 102 | --   | --   |
|            | Ca(ICC2/PI489777)SNP_28864 | 863  | A | G | 43  | 116 | --   | --   |
| CakTC11815 | Ca(ICC2/PI489777)SNP_28865 | 258  | A | G | 15  | 11  | --   | --   |
| CakTC31905 | Ca(ICC2/PI489777)SNP_28866 | 751  | T | A | 123 | 54  | --   | --   |
| CakTC26266 | Ca(ICC2/PI489777)SNP_28867 | 140  | G | C | 49  | 15  | Root | --   |
|            | Ca(ICC2/PI489777)SNP_28868 | 145  | A | T | 40  | 16  | Root | --   |
| CakTC27376 | Ca(ICC2/PI489777)SNP_28869 | 63   | A | C | 7   | 5   | --   | --   |
| CakTC33366 | Ca(ICC2/PI489777)SNP_28870 | 1862 | T | A | 5   | 4   | --   | --   |
|            | Ca(ICC2/PI489777)SNP_28871 | 2058 | A | G | 6   | 4   | --   | --   |
|            | Ca(ICC2/PI489777)SNP_28872 | 2118 | G | T | 7   | 4   | --   | --   |
| CakTC40373 | Ca(ICC2/PI489777)SNP_28873 | 518  | G | A | 3   | 6   | --   | SOH1 |
| CakTC26949 | Ca(ICC2/PI489777)SNP_28874 | 2500 | A | G | 29  | 8   | --   | --   |
|            | Ca(ICC2/PI489777)SNP_28875 | 2966 | T | C | 6   | 5   | --   | --   |
| CakTC23343 | Ca(ICC2/PI489777)SNP_28876 | 381  | G | A | 8   | 6   | --   | --   |
|            | Ca(ICC2/PI489777)SNP_28877 | 741  | A | G | 14  | 4   | --   | --   |
|            | Ca(ICC2/PI489777)SNP_28878 | 1207 | G | A | 8   | 3   | --   | --   |
|            | Ca(ICC2/PI489777)SNP_28879 | 1232 | G | A | 6   | 3   | --   | --   |
| CakTC10330 | Ca(ICC2/PI489777)SNP_28880 | 3193 | C | T | 3   | 6   | --   | --   |
|            | Ca(ICC2/PI489777)SNP_28881 | 4492 | A | T | 8   | 8   | --   | --   |
| CakTC14740 | Ca(ICC2/PI489777)SNP_28882 | 297  | G | A | 5   | 3   | --   | --   |
| CakTC24933 | Ca(ICC2/PI489777)SNP_28883 | 121  | A | C | 18  | 3   | --   | --   |
| CakTC26904 | Ca(ICC2/PI489777)SNP_28884 | 493  | C | T | 5   | 3   | --   | --   |
| CakTC40075 | Ca(ICC2/PI489777)SNP_28885 | 1116 | G | A | 59  | 50  | --   | --   |
|            | Ca(ICC2/PI489777)SNP_28886 | 1176 | A | G | 58  | 49  | --   | --   |
|            | Ca(ICC2/PI489777)SNP_28887 | 1288 | G | A | 25  | 6   | --   | --   |
| CakTC25216 | Ca(ICC2/PI489777)SNP_28888 | 278  | T | C | 6   | 8   | --   | --   |
|            | Ca(ICC2/PI489777)SNP_28889 | 857  | T | C | 25  | 30  | --   | --   |
|            | Ca(ICC2/PI489777)SNP_28890 | 976  | C | T | 16  | 31  | --   | --   |
|            | Ca(ICC2/PI489777)SNP_28891 | 1015 | G | A | 15  | 26  | --   | --   |
| CakTC11034 | Ca(ICC2/PI489777)SNP_28892 | 184  | A | C | 3   | 7   | --   | --   |
| CakTC26329 | Ca(ICC2/PI489777)SNP_28893 | 132  | A | G | 5   | 3   | --   | --   |
|            | Ca(ICC2/PI489777)SNP_28894 | 1946 | C | A | 16  | 6   | --   | --   |
|            | Ca(ICC2/PI489777)SNP_28895 | 2079 | G | C | 14  | 7   | --   | --   |
|            | Ca(ICC2/PI489777)SNP_28896 | 2525 | A | G | 8   | 6   | --   | --   |
| CakTC38695 | Ca(ICC2/PI489777)SNP_28897 | 317  | T | C | 12  | 4   | --   | --   |
|            | Ca(ICC2/PI489777)SNP_28898 | 503  | A | G | 10  | 6   | --   | --   |
|            | Ca(ICC2/PI489777)SNP_28899 | 608  | A | C | 9   | 9   | --   | --   |
|            | Ca(ICC2/PI489777)SNP_28900 | 681  | T | A | 11  | 9   | --   | --   |
|            | Ca(ICC2/PI489777)SNP_28901 | 1068 | C | T | 18  | 8   | --   | --   |
| CakTC22330 | Ca(ICC2/PI489777)SNP_28902 | 176  | C | G | 7   | 5   | --   | --   |
| CakTC40260 | Ca(ICC2/PI489777)SNP_28903 | 207  | T | C | 7   | 5   | --   | --   |
|            | Ca(ICC2/PI489777)SNP_28904 | 364  | G | A | 6   | 6   | --   | --   |
|            | Ca(ICC2/PI489777)SNP_28905 | 987  | C | T | 6   | 7   | --   | --   |
| CakTC40986 | Ca(ICC2/PI489777)SNP_28906 | 77   | C | T | 9   | 14  | --   | --   |
|            | Ca(ICC2/PI489777)SNP_28907 | 241  | T | G | 13  | 17  | --   | --   |
|            | Ca(ICC2/PI489777)SNP_28908 | 288  | G | T | 15  | 18  | --   | --   |
|            | Ca(ICC2/PI489777)SNP_28909 | 315  | T | C | 15  | 17  | --   | --   |
|            | Ca(ICC2/PI489777)SNP_28910 | 407  | T | G | 11  | 5   | --   | --   |
|            | Ca(ICC2/PI489777)SNP_28911 | 558  | A | C | 7   | 6   | --   | --   |
| CakTC37106 | Ca(ICC2/PI489777)SNP_28912 | 701  | G | C | 5   | 3   | --   | --   |
|            | Ca(ICC2/PI489777)SNP_28913 | 1751 | T | C | 3   | 6   | --   | --   |
|            | Ca(ICC2/PI489777)SNP_28914 | 2094 | C | T | 6   | 6   | --   | --   |
|            | Ca(ICC2/PI489777)SNP_28915 | 2646 | C | T | 3   | 10  | --   | --   |
|            | Ca(ICC2/PI489777)SNP_28916 | 2652 | C | G | 3   | 9   | --   | --   |
| CakTC37141 | Ca(ICC2/PI489777)SNP_28917 | 218  | A | T | 3   | 3   | --   | --   |
|            | Ca(ICC2/PI489777)SNP_28918 | 783  | C | T | 12  | 5   | --   | --   |
|            | Ca(ICC2/PI489777)SNP_28919 | 901  | A | G | 10  | 3   | --   | --   |
| CakTC26880 | Ca(ICC2/PI489777)SNP_28920 | 2255 | T | C | 13  | 4   | --   | --   |
| CakTC07663 | Ca(ICC2/PI489777)SNP_28921 | 379  | A | G | 3   | 3   | --   | --   |
| CakTC08529 | Ca(ICC2/PI489777)SNP_28922 | 1298 | C | G | 10  | 6   | --   | --   |
|            | Ca(ICC2/PI489777)SNP_28923 | 1505 | C | T | 7   | 3   | --   | --   |
| CakTC30072 | Ca(ICC2/PI489777)SNP_28924 | 660  | A | G | 4   | 3   | --   | --   |
| CakTC25099 | Ca(ICC2/PI489777)SNP_28925 | 321  | C | T | 15  | 11  | --   | --   |
|            | Ca(ICC2/PI489777)SNP_28926 | 793  | G | C | 18  | 7   | --   | --   |
| CakTC31359 | Ca(ICC2/PI489777)SNP_28927 | 21   | T | C | 3   | 3   | --   | --   |
|            | Ca(ICC2/PI489777)SNP_28928 | 37   | T | G | 3   | 3   | --   | --   |
|            | Ca(ICC2/PI489777)SNP_28929 | 44   | A | C | 3   | 3   | --   | --   |

|            |                            |      |   |   |     |     |    |    |
|------------|----------------------------|------|---|---|-----|-----|----|----|
|            | Ca(ICC2/PI489777)SNP_28930 | 55   | G | A | 3   | 3   | -- | -- |
|            | Ca(ICC2/PI489777)SNP_28931 | 69   | G | A | 3   | 3   | -- | -- |
|            | Ca(ICC2/PI489777)SNP_28932 | 111  | C | A | 9   | 5   | -- | -- |
|            | Ca(ICC2/PI489777)SNP_28933 | 202  | C | A | 15  | 9   | -- | -- |
|            | Ca(ICC2/PI489777)SNP_28934 | 231  | T | C | 17  | 16  | -- | -- |
|            | Ca(ICC2/PI489777)SNP_28935 | 232  | A | T | 16  | 16  | -- | -- |
|            | Ca(ICC2/PI489777)SNP_28936 | 354  | A | G | 25  | 27  | -- | -- |
|            | Ca(ICC2/PI489777)SNP_28937 | 364  | A | G | 26  | 36  | -- | -- |
|            | Ca(ICC2/PI489777)SNP_28938 | 425  | A | T | 38  | 43  | -- | -- |
|            | Ca(ICC2/PI489777)SNP_28939 | 1207 | C | T | 19  | 32  | -- | -- |
|            | Ca(ICC2/PI489777)SNP_28940 | 1306 | T | A | 20  | 29  | -- | -- |
|            | Ca(ICC2/PI489777)SNP_28941 | 1367 | T | C | 18  | 27  | -- | -- |
|            | Ca(ICC2/PI489777)SNP_28942 | 1377 | T | C | 18  | 22  | -- | -- |
|            | Ca(ICC2/PI489777)SNP_28943 | 1529 | G | T | 6   | 4   | -- | -- |
| CakTC41760 | Ca(ICC2/PI489777)SNP_28944 | 866  | C | G | 9   | 5   | -- | -- |
|            | Ca(ICC2/PI489777)SNP_28945 | 1605 | T | C | 11  | 3   | -- | -- |
| CakTC26523 | Ca(ICC2/PI489777)SNP_28946 | 353  | G | A | 49  | 22  | -- | -- |
|            | Ca(ICC2/PI489777)SNP_28947 | 458  | G | T | 47  | 21  | -- | -- |
| CakTC40325 | Ca(ICC2/PI489777)SNP_28948 | 198  | C | T | 8   | 7   | -- | -- |
|            | Ca(ICC2/PI489777)SNP_28949 | 336  | C | T | 14  | 11  | -- | -- |
|            | Ca(ICC2/PI489777)SNP_28950 | 465  | G | A | 14  | 23  | -- | -- |
| CakTC08763 | Ca(ICC2/PI489777)SNP_28951 | 868  | A | G | 3   | 4   | -- | -- |
|            | Ca(ICC2/PI489777)SNP_28952 | 901  | T | A | 3   | 4   | -- | -- |
|            | Ca(ICC2/PI489777)SNP_28953 | 971  | T | C | 4   | 3   | -- | -- |
|            | Ca(ICC2/PI489777)SNP_28954 | 986  | C | G | 4   | 3   | -- | -- |
|            | Ca(ICC2/PI489777)SNP_28955 | 2477 | A | G | 4   | 6   | -- | -- |
| CakTC33950 | Ca(ICC2/PI489777)SNP_28956 | 565  | A | G | 15  | 3   | -- | -- |
|            | Ca(ICC2/PI489777)SNP_28957 | 988  | C | T | 22  | 19  | -- | -- |
|            | Ca(ICC2/PI489777)SNP_28958 | 1000 | T | C | 21  | 16  | -- | -- |
|            | Ca(ICC2/PI489777)SNP_28959 | 1135 | C | T | 24  | 13  | -- | -- |
|            | Ca(ICC2/PI489777)SNP_28960 | 1189 | T | C | 27  | 14  | -- | -- |
|            | Ca(ICC2/PI489777)SNP_28961 | 1303 | T | C | 19  | 13  | -- | -- |
|            | Ca(ICC2/PI489777)SNP_28962 | 1645 | A | G | 30  | 15  | -- | -- |
| CakTC23175 | Ca(ICC2/PI489777)SNP_28963 | 496  | C | G | 11  | 10  | -- | -- |
|            | Ca(ICC2/PI489777)SNP_28964 | 721  | T | C | 3   | 6   | -- | -- |
|            | Ca(ICC2/PI489777)SNP_28965 | 823  | A | G | 6   | 5   | -- | -- |
| CakTC42422 | Ca(ICC2/PI489777)SNP_28966 | 237  | T | C | 4   | 4   | -- | -- |
|            | Ca(ICC2/PI489777)SNP_28967 | 246  | C | T | 5   | 5   | -- | -- |
|            | Ca(ICC2/PI489777)SNP_28968 | 1050 | C | T | 7   | 4   | -- | -- |
|            | Ca(ICC2/PI489777)SNP_28969 | 1359 | A | G | 5   | 3   | -- | -- |
|            | Ca(ICC2/PI489777)SNP_28970 | 1524 | T | A | 5   | 3   | -- | -- |
|            | Ca(ICC2/PI489777)SNP_28971 | 1564 | A | G | 3   | 3   | -- | -- |
| CakTC37194 | Ca(ICC2/PI489777)SNP_28972 | 322  | C | T | 69  | 20  | -- | -- |
|            | Ca(ICC2/PI489777)SNP_28973 | 646  | G | A | 60  | 22  | -- | -- |
|            | Ca(ICC2/PI489777)SNP_28974 | 1210 | G | T | 101 | 44  | -- | -- |
|            | Ca(ICC2/PI489777)SNP_28975 | 1446 | T | G | 57  | 18  | -- | -- |
| CakTC42761 | Ca(ICC2/PI489777)SNP_28976 | 868  | C | G | 156 | 112 | -- | -- |
| CakTC31771 | Ca(ICC2/PI489777)SNP_28977 | 803  | G | C | 6   | 3   | -- | -- |
| CakTC38112 | Ca(ICC2/PI489777)SNP_28978 | 614  | A | C | 6   | 8   | -- | -- |
| CakTC39853 | Ca(ICC2/PI489777)SNP_28979 | 896  | A | G | 12  | 3   | -- | -- |
| CakTC28831 | Ca(ICC2/PI489777)SNP_28980 | 56   | G | T | 5   | 6   | -- | -- |
|            | Ca(ICC2/PI489777)SNP_28981 | 243  | C | T | 14  | 9   | -- | -- |
|            | Ca(ICC2/PI489777)SNP_28982 | 429  | G | A | 22  | 11  | -- | -- |
|            | Ca(ICC2/PI489777)SNP_28983 | 435  | C | T | 20  | 13  | -- | -- |
|            | Ca(ICC2/PI489777)SNP_28984 | 1313 | G | T | 11  | 7   | -- | -- |
|            | Ca(ICC2/PI489777)SNP_28985 | 1348 | G | A | 12  | 5   | -- | -- |
|            | Ca(ICC2/PI489777)SNP_28986 | 1380 | A | C | 13  | 3   | -- | -- |
|            | Ca(ICC2/PI489777)SNP_28987 | 1416 | G | C | 10  | 3   | -- | -- |
| CakTC24666 | Ca(ICC2/PI489777)SNP_28988 | 1576 | T | C | 77  | 6   | -- | -- |
| CakTC14492 | Ca(ICC2/PI489777)SNP_28989 | 402  | T | C | 3   | 3   | -- | -- |
| CakTC38729 | Ca(ICC2/PI489777)SNP_28990 | 135  | T | A | 28  | 7   | -- | -- |
|            | Ca(ICC2/PI489777)SNP_28991 | 258  | T | C | 36  | 7   | -- | -- |
| CakTC37047 | Ca(ICC2/PI489777)SNP_28992 | 123  | T | C | 15  | 4   | -- | -- |
|            | Ca(ICC2/PI489777)SNP_28993 | 251  | G | A | 29  | 8   | -- | -- |
|            | Ca(ICC2/PI489777)SNP_28994 | 929  | A | G | 12  | 8   | -- | -- |
|            | Ca(ICC2/PI489777)SNP_28995 | 1872 | C | T | 21  | 7   | -- | -- |
| CakTC27163 | Ca(ICC2/PI489777)SNP_28996 | 333  | T | C | 9   | 23  | -- | -- |
|            | Ca(ICC2/PI489777)SNP_28997 | 526  | A | C | 17  | 18  | -- | -- |
| CakTC39045 | Ca(ICC2/PI489777)SNP_28998 | 235  | G | C | 10  | 3   | -- | -- |
|            | Ca(ICC2/PI489777)SNP_28999 | 316  | G | A | 12  | 3   | -- | -- |
|            | Ca(ICC2/PI489777)SNP_29000 | 463  | T | C | 18  | 4   | -- | -- |
|            | Ca(ICC2/PI489777)SNP_29001 | 802  | T | C | 11  | 3   | -- | -- |
|            | Ca(ICC2/PI489777)SNP_29002 | 1169 | G | A | 13  | 7   | -- | -- |
|            | Ca(ICC2/PI489777)SNP_29003 | 1204 | G | T | 15  | 6   | -- | -- |



|            |                             |      |   |   |     |     |        |            |
|------------|-----------------------------|------|---|---|-----|-----|--------|------------|
|            | Ca(ICCV2/PI489777)SNP_29004 | 1321 | T | C | 9   | 6   | --     | --         |
| CakTC40487 | Ca(ICCV2/PI489777)SNP_29005 | 201  | T | G | 6   | 5   | --     | --         |
|            | Ca(ICCV2/PI489777)SNP_29006 | 1832 | G | C | 17  | 12  | --     | --         |
|            | Ca(ICCV2/PI489777)SNP_29007 | 2040 | G | A | 6   | 5   | --     | --         |
| CakTC24957 | Ca(ICCV2/PI489777)SNP_29008 | 61   | T | C | 14  | 4   | --     | --         |
|            | Ca(ICCV2/PI489777)SNP_29009 | 217  | T | C | 16  | 7   | --     | --         |
|            | Ca(ICCV2/PI489777)SNP_29010 | 226  | C | A | 16  | 8   | --     | --         |
|            | Ca(ICCV2/PI489777)SNP_29011 | 262  | A | C | 16  | 8   | --     | --         |
|            | Ca(ICCV2/PI489777)SNP_29012 | 2422 | G | T | 7   | 4   | --     | --         |
|            | Ca(ICCV2/PI489777)SNP_29013 | 3066 | C | T | 14  | 11  | --     | --         |
| CakTC42881 | Ca(ICCV2/PI489777)SNP_29014 | 548  | C | G | 8   | 4   | --     | --         |
|            | Ca(ICCV2/PI489777)SNP_29015 | 800  | C | T | 6   | 3   | --     | --         |
| CakTC28160 | Ca(ICCV2/PI489777)SNP_29016 | 836  | C | T | 14  | 4   | --     | --         |
|            | Ca(ICCV2/PI489777)SNP_29017 | 899  | A | G | 13  | 4   | --     | --         |
|            | Ca(ICCV2/PI489777)SNP_29018 | 1427 | A | T | 15  | 6   | --     | --         |
|            | Ca(ICCV2/PI489777)SNP_29019 | 1472 | G | A | 14  | 7   | --     | --         |
|            | Ca(ICCV2/PI489777)SNP_29020 | 1550 | G | A | 9   | 8   | --     | --         |
|            | Ca(ICCV2/PI489777)SNP_29021 | 1697 | C | T | 16  | 8   | --     | --         |
|            | Ca(ICCV2/PI489777)SNP_29022 | 1809 | G | A | 16  | 8   | --     | --         |
|            | Ca(ICCV2/PI489777)SNP_29023 | 2195 | A | G | 15  | 6   | --     | --         |
|            | Ca(ICCV2/PI489777)SNP_29024 | 2289 | G | C | 10  | 6   | --     | --         |
| CakTC31304 | Ca(ICCV2/PI489777)SNP_29025 | 459  | C | T | 8   | 5   | --     | --         |
|            | Ca(ICCV2/PI489777)SNP_29026 | 2095 | C | G | 5   | 5   | --     | --         |
| CakTC08650 | Ca(ICCV2/PI489777)SNP_29027 | 64   | C | G | 11  | 10  | --     | --         |
|            | Ca(ICCV2/PI489777)SNP_29028 | 432  | T | C | 196 | 153 | --     | --         |
| CakTC39592 | Ca(ICCV2/PI489777)SNP_29029 | 137  | A | T | 11  | 10  | --     | TRAF       |
|            | Ca(ICCV2/PI489777)SNP_29030 | 350  | A | G | 23  | 9   | --     | TRAF       |
|            | Ca(ICCV2/PI489777)SNP_29031 | 357  | A | C | 22  | 8   | --     | TRAF       |
|            | Ca(ICCV2/PI489777)SNP_29032 | 918  | T | C | 18  | 4   | --     | TRAF       |
| CakTC23196 | Ca(ICCV2/PI489777)SNP_29033 | 1055 | T | C | 4   | 6   | --     | --         |
| CakTC37705 | Ca(ICCV2/PI489777)SNP_29034 | 1353 | A | T | 6   | 7   | --     | --         |
| CakTC41370 | Ca(ICCV2/PI489777)SNP_29035 | 246  | C | G | 42  | 14  | --     | --         |
| CakTC38024 | Ca(ICCV2/PI489777)SNP_29036 | 487  | C | T | 41  | 18  | --     | --         |
|            | Ca(ICCV2/PI489777)SNP_29037 | 1123 | C | T | 34  | 30  | --     | --         |
|            | Ca(ICCV2/PI489777)SNP_29038 | 1432 | T | A | 19  | 9   | --     | --         |
| CakTC06214 | Ca(ICCV2/PI489777)SNP_29039 | 1949 | C | T | 4   | 3   | --     | --         |
| CakTC42262 | Ca(ICCV2/PI489777)SNP_29040 | 274  | C | T | 3   | 3   | --     | --         |
|            | Ca(ICCV2/PI489777)SNP_29041 | 346  | A | T | 3   | 4   | --     | --         |
|            | Ca(ICCV2/PI489777)SNP_29042 | 988  | C | T | 5   | 6   | --     | --         |
| CakTC36802 | Ca(ICCV2/PI489777)SNP_29043 | 824  | C | T | 15  | 8   | --     | --         |
|            | Ca(ICCV2/PI489777)SNP_29044 | 1061 | G | A | 16  | 9   | --     | --         |
| CakTC25470 | Ca(ICCV2/PI489777)SNP_29045 | 286  | T | C | 3   | 4   | --     | --         |
| CakTC26877 | Ca(ICCV2/PI489777)SNP_29046 | 172  | T | C | 4   | 4   | --     | --         |
| CakTC00444 | Ca(ICCV2/PI489777)SNP_29047 | 535  | G | A | 4   | 3   | --     | --         |
|            | Ca(ICCV2/PI489777)SNP_29048 | 576  | T | C | 4   | 4   | --     | --         |
| CakTC09477 | Ca(ICCV2/PI489777)SNP_29049 | 916  | T | C | 4   | 6   | --     | bZIP       |
|            | Ca(ICCV2/PI489777)SNP_29050 | 1036 | G | A | 4   | 11  | --     | bZIP       |
| CakTC40752 | Ca(ICCV2/PI489777)SNP_29051 | 850  | G | A | 56  | 35  | --     | --         |
|            | Ca(ICCV2/PI489777)SNP_29052 | 1348 | A | G | 46  | 60  | --     | --         |
| CakTC30201 | Ca(ICCV2/PI489777)SNP_29053 | 947  | T | C | 3   | 4   | Flower | bud        |
| CakTC43315 | Ca(ICCV2/PI489777)SNP_29054 | 477  | G | A | 12  | 4   | --     | PBF-2-like |
|            | Ca(ICCV2/PI489777)SNP_29055 | 521  | C | T | 13  | 3   | --     | PBF-2-like |
| CakTC29241 | Ca(ICCV2/PI489777)SNP_29056 | 212  | G | A | 28  | 6   | --     | --         |
|            | Ca(ICCV2/PI489777)SNP_29057 | 957  | A | G | 40  | 12  | --     | --         |
|            | Ca(ICCV2/PI489777)SNP_29058 | 984  | G | A | 22  | 9   | --     | --         |
| CakTC14064 | Ca(ICCV2/PI489777)SNP_29059 | 560  | G | A | 3   | 4   | --     | CCHC       |
| CakTC34403 | Ca(ICCV2/PI489777)SNP_29060 | 801  | C | T | 10  | 6   | --     | --         |
|            | Ca(ICCV2/PI489777)SNP_29061 | 1363 | C | A | 4   | 6   | --     | --         |
|            | Ca(ICCV2/PI489777)SNP_29062 | 1765 | A | T | 8   | 4   | --     | --         |
| CakTC27828 | Ca(ICCV2/PI489777)SNP_29063 | 328  | T | A | 15  | 4   | --     | --         |
|            | Ca(ICCV2/PI489777)SNP_29064 | 1318 | G | A | 26  | 25  | --     | --         |
|            | Ca(ICCV2/PI489777)SNP_29065 | 1446 | G | A | 31  | 24  | --     | --         |
| CakTC33388 | Ca(ICCV2/PI489777)SNP_29066 | 992  | A | G | 8   | 5   | --     | --         |
|            | Ca(ICCV2/PI489777)SNP_29067 | 1179 | A | C | 12  | 10  | --     | --         |
|            | Ca(ICCV2/PI489777)SNP_29068 | 1405 | C | A | 13  | 10  | --     | --         |
|            | Ca(ICCV2/PI489777)SNP_29069 | 1503 | C | A | 14  | 9   | --     | --         |
| CakTC30942 | Ca(ICCV2/PI489777)SNP_29070 | 697  | C | T | 10  | 4   | --     | --         |
|            | Ca(ICCV2/PI489777)SNP_29071 | 1071 | A | G | 5   | 4   | --     | --         |
|            | Ca(ICCV2/PI489777)SNP_29072 | 2656 | C | T | 5   | 9   | --     | --         |
|            | Ca(ICCV2/PI489777)SNP_29073 | 2804 | T | A | 6   | 4   | --     | --         |
| CakTC25498 | Ca(ICCV2/PI489777)SNP_29074 | 1089 | T | C | 41  | 24  | --     | --         |
|            | Ca(ICCV2/PI489777)SNP_29075 | 1128 | C | T | 34  | 15  | --     | --         |
|            | Ca(ICCV2/PI489777)SNP_29076 | 1227 | T | C | 35  | 22  | --     | --         |
| CakTC37205 | Ca(ICCV2/PI489777)SNP_29077 | 848  | A | C | 10  | 14  | --     | --         |

|            |                            |      |   |   |    |    |       |    |
|------------|----------------------------|------|---|---|----|----|-------|----|
|            | Ca(ICC2/PI489777)SNP_29078 | 903  | G | A | 11 | 14 | --    | -- |
| CakTC23558 | Ca(ICC2/PI489777)SNP_29079 | 210  | C | T | 13 | 4  | --    | -- |
|            | Ca(ICC2/PI489777)SNP_29080 | 595  | G | A | 31 | 9  | --    | -- |
|            | Ca(ICC2/PI489777)SNP_29081 | 636  | G | T | 32 | 6  | --    | -- |
|            | Ca(ICC2/PI489777)SNP_29082 | 651  | G | A | 35 | 4  | --    | -- |
|            | Ca(ICC2/PI489777)SNP_29083 | 1179 | C | T | 22 | 4  | --    | -- |
|            | Ca(ICC2/PI489777)SNP_29084 | 1380 | T | G | 36 | 7  | --    | -- |
|            | Ca(ICC2/PI489777)SNP_29085 | 1527 | A | C | 28 | 13 | --    | -- |
|            | Ca(ICC2/PI489777)SNP_29086 | 1692 | T | G | 28 | 13 | --    | -- |
|            | Ca(ICC2/PI489777)SNP_29087 | 1824 | T | G | 30 | 9  | --    | -- |
|            | Ca(ICC2/PI489777)SNP_29088 | 1863 | A | G | 26 | 8  | --    | -- |
|            | Ca(ICC2/PI489777)SNP_29089 | 1944 | C | T | 20 | 8  | --    | -- |
| CakTC43021 | Ca(ICC2/PI489777)SNP_29090 | 265  | T | G | 19 | 4  | --    | -- |
|            | Ca(ICC2/PI489777)SNP_29091 | 465  | T | A | 14 | 6  | --    | -- |
|            | Ca(ICC2/PI489777)SNP_29092 | 481  | A | C | 14 | 5  | --    | -- |
|            | Ca(ICC2/PI489777)SNP_29093 | 748  | T | C | 7  | 6  | --    | -- |
|            | Ca(ICC2/PI489777)SNP_29094 | 1396 | C | A | 3  | 9  | --    | -- |
|            | Ca(ICC2/PI489777)SNP_29095 | 1453 | T | A | 5  | 8  | --    | -- |
|            | Ca(ICC2/PI489777)SNP_29096 | 1460 | A | T | 4  | 7  | --    | -- |
|            | Ca(ICC2/PI489777)SNP_29097 | 1543 | T | C | 3  | 5  | --    | -- |
|            | Ca(ICC2/PI489777)SNP_29098 | 1643 | G | A | 4  | 6  | --    | -- |
|            | Ca(ICC2/PI489777)SNP_29099 | 1666 | C | G | 4  | 6  | --    | -- |
|            | Ca(ICC2/PI489777)SNP_29100 | 1748 | G | A | 4  | 3  | --    | -- |
| CakTC33539 | Ca(ICC2/PI489777)SNP_29101 | 582  | C | T | 19 | 38 | --    | -- |
| CakTC26705 | Ca(ICC2/PI489777)SNP_29102 | 843  | A | G | 6  | 26 | --    | -- |
|            | Ca(ICC2/PI489777)SNP_29103 | 1533 | C | T | 19 | 32 | --    | -- |
|            | Ca(ICC2/PI489777)SNP_29104 | 1590 | G | T | 21 | 32 | --    | -- |
|            | Ca(ICC2/PI489777)SNP_29105 | 1647 | A | G | 13 | 43 | --    | -- |
|            | Ca(ICC2/PI489777)SNP_29106 | 2015 | G | C | 4  | 27 | --    | -- |
| CakTC09514 | Ca(ICC2/PI489777)SNP_29107 | 737  | A | G | 4  | 6  | --    | -- |
|            | Ca(ICC2/PI489777)SNP_29108 | 741  | T | C | 4  | 5  | --    | -- |
|            | Ca(ICC2/PI489777)SNP_29109 | 747  | G | A | 4  | 5  | --    | -- |
|            | Ca(ICC2/PI489777)SNP_29110 | 776  | T | G | 4  | 6  | --    | -- |
|            | Ca(ICC2/PI489777)SNP_29111 | 836  | G | A | 4  | 6  | --    | -- |
|            | Ca(ICC2/PI489777)SNP_29112 | 887  | G | T | 3  | 4  | --    | -- |
|            | Ca(ICC2/PI489777)SNP_29113 | 926  | C | T | 3  | 6  | --    | -- |
|            | Ca(ICC2/PI489777)SNP_29114 | 948  | C | T | 3  | 5  | --    | -- |
|            | Ca(ICC2/PI489777)SNP_29115 | 958  | C | T | 3  | 6  | --    | -- |
|            | Ca(ICC2/PI489777)SNP_29116 | 974  | T | A | 3  | 6  | --    | -- |
|            | Ca(ICC2/PI489777)SNP_29117 | 1020 | T | G | 3  | 6  | --    | -- |
|            | Ca(ICC2/PI489777)SNP_29118 | 1088 | G | A | 4  | 6  | --    | -- |
|            | Ca(ICC2/PI489777)SNP_29119 | 1106 | A | C | 4  | 6  | --    | -- |
| CakTC42970 | Ca(ICC2/PI489777)SNP_29120 | 443  | G | A | 12 | 3  | --    | -- |
| CakTC25464 | Ca(ICC2/PI489777)SNP_29121 | 637  | A | C | 9  | 3  | --    | -- |
|            | Ca(ICC2/PI489777)SNP_29122 | 965  | G | T | 16 | 5  | --    | -- |
| CakTC27935 | Ca(ICC2/PI489777)SNP_29123 | 631  | T | G | 23 | 12 | --    | -- |
|            | Ca(ICC2/PI489777)SNP_29124 | 634  | A | T | 24 | 14 | --    | -- |
|            | Ca(ICC2/PI489777)SNP_29125 | 656  | T | C | 24 | 19 | --    | -- |
|            | Ca(ICC2/PI489777)SNP_29126 | 687  | C | T | 22 | 19 | --    | -- |
|            | Ca(ICC2/PI489777)SNP_29127 | 734  | C | G | 23 | 17 | --    | -- |
|            | Ca(ICC2/PI489777)SNP_29128 | 743  | A | G | 22 | 13 | --    | -- |
| CakTC42768 | Ca(ICC2/PI489777)SNP_29129 | 82   | A | T | 8  | 4  | --    | -- |
|            | Ca(ICC2/PI489777)SNP_29130 | 107  | C | A | 9  | 5  | --    | -- |
|            | Ca(ICC2/PI489777)SNP_29131 | 197  | A | G | 9  | 6  | --    | -- |
|            | Ca(ICC2/PI489777)SNP_29132 | 413  | T | C | 36 | 10 | --    | -- |
|            | Ca(ICC2/PI489777)SNP_29133 | 599  | C | T | 57 | 24 | --    | -- |
|            | Ca(ICC2/PI489777)SNP_29134 | 1028 | A | G | 21 | 6  | --    | -- |
| CakTC39404 | Ca(ICC2/PI489777)SNP_29135 | 103  | A | T | 22 | 11 | --    | -- |
|            | Ca(ICC2/PI489777)SNP_29136 | 295  | C | G | 29 | 21 | --    | -- |
|            | Ca(ICC2/PI489777)SNP_29137 | 541  | T | G | 14 | 9  | --    | -- |
|            | Ca(ICC2/PI489777)SNP_29138 | 775  | A | C | 22 | 18 | --    | -- |
|            | Ca(ICC2/PI489777)SNP_29139 | 940  | G | A | 17 | 17 | --    | -- |
|            | Ca(ICC2/PI489777)SNP_29140 | 967  | C | T | 16 | 17 | --    | -- |
|            | Ca(ICC2/PI489777)SNP_29141 | 1012 | T | G | 15 | 16 | --    | -- |
| CakTC38910 | Ca(ICC2/PI489777)SNP_29142 | 913  | C | T | 7  | 9  | Shoot | -- |
|            | Ca(ICC2/PI489777)SNP_29143 | 1289 | A | G | 3  | 9  | Shoot | -- |
| CakTC40838 | Ca(ICC2/PI489777)SNP_29144 | 239  | A | C | 13 | 6  | --    | -- |
|            | Ca(ICC2/PI489777)SNP_29145 | 480  | T | A | 5  | 4  | --    | -- |
|            | Ca(ICC2/PI489777)SNP_29146 | 537  | C | T | 5  | 4  | --    | -- |
|            | Ca(ICC2/PI489777)SNP_29147 | 575  | T | C | 5  | 4  | --    | -- |
|            | Ca(ICC2/PI489777)SNP_29148 | 583  | T | G | 5  | 4  | --    | -- |
| CakTC06590 | Ca(ICC2/PI489777)SNP_29149 | 357  | T | C | 3  | 3  | --    | -- |
|            | Ca(ICC2/PI489777)SNP_29150 | 524  | G | T | 8  | 3  | --    | -- |
| CakTC12807 | Ca(ICC2/PI489777)SNP_29151 | 1223 | C | A | 4  | 3  | --    | -- |

|            |                            |      |   |   |    |    |           |    |
|------------|----------------------------|------|---|---|----|----|-----------|----|
| CakTC26276 | Ca(ICC2/PI489777)SNP_29152 | 147  | C | A | 19 | 11 | --        | -- |
|            | Ca(ICC2/PI489777)SNP_29153 | 422  | A | G | 22 | 20 | --        | -- |
|            | Ca(ICC2/PI489777)SNP_29154 | 423  | C | A | 21 | 19 | --        | -- |
| CakTC39397 | Ca(ICC2/PI489777)SNP_29155 | 864  | G | A | 35 | 6  | --        | -- |
|            | Ca(ICC2/PI489777)SNP_29156 | 938  | G | A | 34 | 6  | --        | -- |
|            | Ca(ICC2/PI489777)SNP_29157 | 1025 | T | A | 28 | 6  | --        | -- |
|            | Ca(ICC2/PI489777)SNP_29158 | 1033 | T | C | 27 | 6  | --        | -- |
|            | Ca(ICC2/PI489777)SNP_29159 | 1232 | C | T | 9  | 11 | --        | -- |
|            | Ca(ICC2/PI489777)SNP_29160 | 1265 | A | G | 8  | 9  | --        | -- |
|            | Ca(ICC2/PI489777)SNP_29161 | 1280 | G | C | 8  | 9  | --        | -- |
|            | Ca(ICC2/PI489777)SNP_29162 | 1433 | T | G | 5  | 7  | --        | -- |
|            | Ca(ICC2/PI489777)SNP_29163 | 1445 | A | G | 5  | 8  | --        | -- |
|            | Ca(ICC2/PI489777)SNP_29164 | 1467 | C | T | 5  | 8  | --        | -- |
| CakTC37249 | Ca(ICC2/PI489777)SNP_29165 | 368  | A | G | 4  | 3  | --        | -- |
| CakTC41465 | Ca(ICC2/PI489777)SNP_29166 | 525  | G | C | 72 | 54 | --        | -- |
| CakTC37819 | Ca(ICC2/PI489777)SNP_29167 | 347  | A | T | 20 | 3  | --        | -- |
| CakTC22811 | Ca(ICC2/PI489777)SNP_29168 | 1880 | T | A | 29 | 3  | --        | -- |
|            | Ca(ICC2/PI489777)SNP_29169 | 2388 | C | A | 18 | 7  | --        | -- |
|            | Ca(ICC2/PI489777)SNP_29170 | 2394 | G | C | 20 | 7  | --        | -- |
|            | Ca(ICC2/PI489777)SNP_29171 | 2414 | T | G | 19 | 8  | --        | -- |
|            | Ca(ICC2/PI489777)SNP_29172 | 2463 | A | T | 18 | 6  | --        | -- |
|            | Ca(ICC2/PI489777)SNP_29173 | 2478 | T | C | 25 | 7  | --        | -- |
|            | Ca(ICC2/PI489777)SNP_29174 | 2491 | T | C | 26 | 10 | --        | -- |
|            | Ca(ICC2/PI489777)SNP_29175 | 2709 | G | T | 44 | 10 | --        | -- |
|            | Ca(ICC2/PI489777)SNP_29176 | 2729 | G | A | 46 | 12 | --        | -- |
|            | Ca(ICC2/PI489777)SNP_29177 | 2765 | G | A | 44 | 10 | --        | -- |
|            | Ca(ICC2/PI489777)SNP_29178 | 3139 | C | T | 11 | 4  | --        | -- |
|            | Ca(ICC2/PI489777)SNP_29179 | 3218 | G | A | 7  | 4  | --        | -- |
|            | Ca(ICC2/PI489777)SNP_29180 | 3344 | A | G | 4  | 6  | --        | -- |
| CakTC42124 | Ca(ICC2/PI489777)SNP_29181 | 150  | C | T | 5  | 3  | --        | -- |
|            | Ca(ICC2/PI489777)SNP_29182 | 477  | C | G | 22 | 4  | --        | -- |
| CakTC10938 | Ca(ICC2/PI489777)SNP_29183 | 205  | G | T | 20 | 13 | --        | -- |
|            | Ca(ICC2/PI489777)SNP_29184 | 388  | A | G | 20 | 23 | --        | -- |
| CakTC16040 | Ca(ICC2/PI489777)SNP_29185 | 4438 | C | T | 5  | 3  | --        | -- |
| CakTC41157 | Ca(ICC2/PI489777)SNP_29186 | 327  | A | G | 3  | 4  | Root      | -- |
|            | Ca(ICC2/PI489777)SNP_29187 | 437  | G | C | 3  | 4  | Root      | -- |
| CakTC31467 | Ca(ICC2/PI489777)SNP_29188 | 630  | C | T | 13 | 16 | Young_pod | -- |
|            | Ca(ICC2/PI489777)SNP_29189 | 784  | C | G | 19 | 11 | Young_pod | -- |
|            | Ca(ICC2/PI489777)SNP_29190 | 814  | G | A | 18 | 11 | Young_pod | -- |
|            | Ca(ICC2/PI489777)SNP_29191 | 832  | C | G | 17 | 10 | Young_pod | -- |
| CakTC30793 | Ca(ICC2/PI489777)SNP_29192 | 709  | T | A | 9  | 4  | --        | -- |
|            | Ca(ICC2/PI489777)SNP_29193 | 1735 | G | A | 8  | 5  | --        | -- |
|            | Ca(ICC2/PI489777)SNP_29194 | 1780 | A | T | 7  | 5  | --        | -- |
| CakTC38602 | Ca(ICC2/PI489777)SNP_29195 | 151  | T | C | 6  | 3  | --        | -- |
|            | Ca(ICC2/PI489777)SNP_29196 | 299  | A | T | 5  | 3  | --        | -- |
|            | Ca(ICC2/PI489777)SNP_29197 | 345  | G | C | 6  | 4  | --        | -- |
|            | Ca(ICC2/PI489777)SNP_29198 | 399  | T | C | 6  | 3  | --        | -- |
|            | Ca(ICC2/PI489777)SNP_29199 | 879  | T | C | 5  | 7  | --        | -- |
|            | Ca(ICC2/PI489777)SNP_29200 | 913  | G | A | 9  | 7  | --        | -- |
| CakTC23556 | Ca(ICC2/PI489777)SNP_29201 | 664  | T | G | 46 | 22 | --        | -- |
|            | Ca(ICC2/PI489777)SNP_29202 | 703  | G | A | 45 | 24 | --        | -- |
|            | Ca(ICC2/PI489777)SNP_29203 | 1432 | A | C | 37 | 9  | --        | -- |
|            | Ca(ICC2/PI489777)SNP_29204 | 2095 | A | C | 41 | 20 | --        | -- |
|            | Ca(ICC2/PI489777)SNP_29205 | 2651 | A | G | 20 | 8  | --        | -- |
| CakTC06178 | Ca(ICC2/PI489777)SNP_29206 | 444  | G | A | 6  | 6  | --        | -- |
|            | Ca(ICC2/PI489777)SNP_29207 | 673  | C | T | 9  | 8  | --        | -- |
|            | Ca(ICC2/PI489777)SNP_29208 | 726  | G | A | 6  | 5  | --        | -- |
| CakTC32654 | Ca(ICC2/PI489777)SNP_29209 | 504  | A | G | 17 | 16 | --        | -- |
|            | Ca(ICC2/PI489777)SNP_29210 | 1978 | A | C | 21 | 8  | --        | -- |
|            | Ca(ICC2/PI489777)SNP_29211 | 2106 | T | C | 17 | 8  | --        | -- |
|            | Ca(ICC2/PI489777)SNP_29212 | 2111 | C | G | 19 | 8  | --        | -- |
| CakTC40179 | Ca(ICC2/PI489777)SNP_29213 | 686  | T | A | 4  | 9  | --        | -- |
|            | Ca(ICC2/PI489777)SNP_29214 | 866  | T | C | 6  | 16 | --        | -- |
|            | Ca(ICC2/PI489777)SNP_29215 | 920  | C | G | 9  | 16 | --        | -- |
|            | Ca(ICC2/PI489777)SNP_29216 | 1002 | G | T | 8  | 11 | --        | -- |
| CakTC41837 | Ca(ICC2/PI489777)SNP_29217 | 233  | A | G | 13 | 10 | --        | -- |
|            | Ca(ICC2/PI489777)SNP_29218 | 449  | A | G | 12 | 9  | --        | -- |
|            | Ca(ICC2/PI489777)SNP_29219 | 722  | A | C | 13 | 6  | --        | -- |
|            | Ca(ICC2/PI489777)SNP_29220 | 922  | G | T | 4  | 3  | --        | -- |
| CakTC25696 | Ca(ICC2/PI489777)SNP_29221 | 115  | C | G | 3  | 3  | --        | -- |
|            | Ca(ICC2/PI489777)SNP_29222 | 1523 | G | A | 7  | 5  | --        | -- |
| CakTC39054 | Ca(ICC2/PI489777)SNP_29223 | 219  | A | G | 40 | 24 | --        | -- |
|            | Ca(ICC2/PI489777)SNP_29224 | 963  | C | T | 34 | 20 | --        | -- |
|            | Ca(ICC2/PI489777)SNP_29225 | 1078 | T | G | 29 | 16 | --        | -- |

|            |                             |      |   |   |    |    |    |     |
|------------|-----------------------------|------|---|---|----|----|----|-----|
| CakTC40213 | Ca(ICCV2/PI489777)SNP_29226 | 341  | G | A | 14 | 6  | -- | C3H |
|            | Ca(ICCV2/PI489777)SNP_29227 | 540  | T | C | 12 | 6  | -- | C3H |
|            | Ca(ICCV2/PI489777)SNP_29228 | 657  | T | C | 7  | 7  | -- | C3H |
|            | Ca(ICCV2/PI489777)SNP_29229 | 729  | T | A | 4  | 4  | -- | C3H |
|            | Ca(ICCV2/PI489777)SNP_29230 | 834  | G | A | 4  | 3  | -- | C3H |
| CakTC37241 | Ca(ICCV2/PI489777)SNP_29231 | 298  | A | T | 39 | 14 | -- | --  |
|            | Ca(ICCV2/PI489777)SNP_29232 | 338  | C | T | 37 | 15 | -- | --  |
|            | Ca(ICCV2/PI489777)SNP_29233 | 478  | G | A | 22 | 19 | -- | --  |
| CakTC38419 | Ca(ICCV2/PI489777)SNP_29234 | 1055 | C | A | 5  | 3  | -- | --  |
| CakTC29261 | Ca(ICCV2/PI489777)SNP_29235 | 660  | T | G | 15 | 8  | -- | --  |
|            | Ca(ICCV2/PI489777)SNP_29236 | 759  | T | C | 17 | 8  | -- | --  |
|            | Ca(ICCV2/PI489777)SNP_29237 | 2854 | T | C | 6  | 3  | -- | --  |
|            | Ca(ICCV2/PI489777)SNP_29238 | 2875 | A | G | 8  | 3  | -- | --  |
|            | Ca(ICCV2/PI489777)SNP_29239 | 2878 | A | G | 8  | 3  | -- | --  |
|            | Ca(ICCV2/PI489777)SNP_29240 | 2908 | A | G | 7  | 3  | -- | --  |
| CakTC33207 | Ca(ICCV2/PI489777)SNP_29241 | 1055 | G | T | 6  | 7  | -- | --  |
|            | Ca(ICCV2/PI489777)SNP_29242 | 1310 | A | C | 11 | 9  | -- | --  |
|            | Ca(ICCV2/PI489777)SNP_29243 | 1781 | T | A | 6  | 5  | -- | --  |
|            | Ca(ICCV2/PI489777)SNP_29244 | 1947 | G | C | 5  | 4  | -- | --  |
| CakTC42074 | Ca(ICCV2/PI489777)SNP_29245 | 559  | C | G | 18 | 3  | -- | --  |
| CakTC39934 | Ca(ICCV2/PI489777)SNP_29246 | 687  | C | A | 10 | 3  | -- | --  |
|            | Ca(ICCV2/PI489777)SNP_29247 | 753  | G | A | 9  | 7  | -- | --  |
|            | Ca(ICCV2/PI489777)SNP_29248 | 930  | C | A | 20 | 7  | -- | --  |
|            | Ca(ICCV2/PI489777)SNP_29249 | 951  | G | C | 22 | 7  | -- | --  |
| CakTC36968 | Ca(ICCV2/PI489777)SNP_29250 | 342  | G | A | 3  | 17 | -- | --  |
| CakTC23129 | Ca(ICCV2/PI489777)SNP_29251 | 195  | A | G | 10 | 5  | -- | --  |
|            | Ca(ICCV2/PI489777)SNP_29252 | 213  | T | C | 13 | 4  | -- | --  |
|            | Ca(ICCV2/PI489777)SNP_29253 | 685  | A | C | 16 | 12 | -- | --  |
|            | Ca(ICCV2/PI489777)SNP_29254 | 789  | G | A | 16 | 12 | -- | --  |
|            | Ca(ICCV2/PI489777)SNP_29255 | 827  | T | C | 17 | 13 | -- | --  |
|            | Ca(ICCV2/PI489777)SNP_29256 | 1396 | A | G | 9  | 3  | -- | --  |
|            | Ca(ICCV2/PI489777)SNP_29257 | 1427 | C | A | 11 | 3  | -- | --  |
|            | Ca(ICCV2/PI489777)SNP_29258 | 1590 | C | G | 8  | 4  | -- | --  |
|            | Ca(ICCV2/PI489777)SNP_29259 | 1642 | G | A | 6  | 4  | -- | --  |
|            | Ca(ICCV2/PI489777)SNP_29260 | 1643 | T | C | 6  | 4  | -- | --  |
|            | Ca(ICCV2/PI489777)SNP_29261 | 1688 | G | C | 6  | 3  | -- | --  |
| CakTC30744 | Ca(ICCV2/PI489777)SNP_29262 | 294  | C | T | 5  | 6  | -- | --  |
|            | Ca(ICCV2/PI489777)SNP_29263 | 1085 | G | A | 12 | 3  | -- | --  |
|            | Ca(ICCV2/PI489777)SNP_29264 | 1086 | G | A | 12 | 3  | -- | --  |
|            | Ca(ICCV2/PI489777)SNP_29265 | 2657 | G | A | 7  | 5  | -- | --  |
|            | Ca(ICCV2/PI489777)SNP_29266 | 2829 | G | A | 7  | 5  | -- | --  |
|            | Ca(ICCV2/PI489777)SNP_29267 | 2977 | T | C | 5  | 9  | -- | --  |
|            | Ca(ICCV2/PI489777)SNP_29268 | 3164 | G | A | 9  | 3  | -- | --  |
|            | Ca(ICCV2/PI489777)SNP_29269 | 3286 | A | G | 9  | 4  | -- | --  |
| CakTC15709 | Ca(ICCV2/PI489777)SNP_29270 | 306  | T | C | 4  | 7  | -- | --  |
| CakTC23117 | Ca(ICCV2/PI489777)SNP_29271 | 534  | C | T | 6  | 3  | -- | --  |
| CakTC37164 | Ca(ICCV2/PI489777)SNP_29272 | 237  | T | C | 16 | 4  | -- | --  |
|            | Ca(ICCV2/PI489777)SNP_29273 | 596  | G | A | 10 | 8  | -- | --  |
|            | Ca(ICCV2/PI489777)SNP_29274 | 693  | T | C | 6  | 7  | -- | --  |
| CakTC32108 | Ca(ICCV2/PI489777)SNP_29275 | 235  | T | C | 12 | 8  | -- | --  |
|            | Ca(ICCV2/PI489777)SNP_29276 | 253  | A | T | 14 | 8  | -- | --  |
|            | Ca(ICCV2/PI489777)SNP_29277 | 265  | A | T | 14 | 7  | -- | --  |
|            | Ca(ICCV2/PI489777)SNP_29278 | 295  | C | G | 14 | 8  | -- | --  |
|            | Ca(ICCV2/PI489777)SNP_29279 | 304  | C | A | 12 | 8  | -- | --  |
| CakTC40067 | Ca(ICCV2/PI489777)SNP_29280 | 76   | A | G | 11 | 5  | -- | --  |
|            | Ca(ICCV2/PI489777)SNP_29281 | 434  | A | G | 26 | 14 | -- | --  |
|            | Ca(ICCV2/PI489777)SNP_29282 | 988  | G | A | 23 | 18 | -- | --  |
| CakTC40862 | Ca(ICCV2/PI489777)SNP_29283 | 645  | T | C | 17 | 16 | -- | --  |
| CakTC29861 | Ca(ICCV2/PI489777)SNP_29284 | 761  | G | T | 8  | 5  | -- | --  |
|            | Ca(ICCV2/PI489777)SNP_29285 | 833  | G | A | 7  | 10 | -- | --  |
|            | Ca(ICCV2/PI489777)SNP_29286 | 1304 | T | C | 6  | 6  | -- | --  |
|            | Ca(ICCV2/PI489777)SNP_29287 | 1676 | T | C | 8  | 4  | -- | --  |
|            | Ca(ICCV2/PI489777)SNP_29288 | 2044 | C | A | 6  | 9  | -- | --  |
|            | Ca(ICCV2/PI489777)SNP_29289 | 2084 | T | C | 4  | 13 | -- | --  |
|            | Ca(ICCV2/PI489777)SNP_29290 | 2267 | T | C | 6  | 10 | -- | --  |
|            | Ca(ICCV2/PI489777)SNP_29291 | 2276 | T | A | 5  | 11 | -- | --  |
| CakTC27471 | Ca(ICCV2/PI489777)SNP_29292 | 388  | A | T | 4  | 5  | -- | --  |
|            | Ca(ICCV2/PI489777)SNP_29293 | 431  | A | C | 5  | 4  | -- | --  |
|            | Ca(ICCV2/PI489777)SNP_29294 | 597  | T | G | 4  | 3  | -- | --  |
|            | Ca(ICCV2/PI489777)SNP_29295 | 1690 | G | A | 6  | 3  | -- | --  |
|            | Ca(ICCV2/PI489777)SNP_29296 | 1714 | C | T | 5  | 3  | -- | --  |
| CakTC35424 | Ca(ICCV2/PI489777)SNP_29297 | 731  | G | T | 6  | 9  | -- | --  |
|            | Ca(ICCV2/PI489777)SNP_29298 | 1175 | C | T | 4  | 4  | -- | --  |
|            | Ca(ICCV2/PI489777)SNP_29299 | 1446 | A | G | 7  | 4  | -- | --  |

|            |                            |      |   |   |    |     |    |     |
|------------|----------------------------|------|---|---|----|-----|----|-----|
|            | Ca(ICC2/PI489777)SNP_29300 | 1499 | T | C | 6  | 3   | -- | --  |
|            | Ca(ICC2/PI489777)SNP_29301 | 2522 | T | C | 3  | 4   | -- | --  |
|            | Ca(ICC2/PI489777)SNP_29302 | 2823 | G | A | 5  | 4   | -- | --  |
| CakTC09677 | Ca(ICC2/PI489777)SNP_29303 | 789  | C | A | 3  | 6   | -- | --  |
|            | Ca(ICC2/PI489777)SNP_29304 | 2562 | T | C | 5  | 5   | -- | --  |
| CakTC41829 | Ca(ICC2/PI489777)SNP_29305 | 1350 | T | C | 8  | 6   | -- | --  |
| CakTC00293 | Ca(ICC2/PI489777)SNP_29306 | 1041 | C | T | 4  | 3   | -- | --  |
| CakTC23411 | Ca(ICC2/PI489777)SNP_29307 | 978  | T | G | 22 | 5   | -- | --  |
|            | Ca(ICC2/PI489777)SNP_29308 | 1966 | C | T | 4  | 7   | -- | --  |
| CakTC39662 | Ca(ICC2/PI489777)SNP_29309 | 755  | T | C | 4  | 5   | -- | --  |
|            | Ca(ICC2/PI489777)SNP_29310 | 773  | T | C | 3  | 5   | -- | --  |
|            | Ca(ICC2/PI489777)SNP_29311 | 1250 | A | G | 6  | 14  | -- | --  |
|            | Ca(ICC2/PI489777)SNP_29312 | 1472 | A | G | 4  | 3   | -- | --  |
|            | Ca(ICC2/PI489777)SNP_29313 | 1478 | A | G | 4  | 4   | -- | --  |
| CakTC42676 | Ca(ICC2/PI489777)SNP_29314 | 790  | A | G | 94 | 115 | -- | --  |
|            | Ca(ICC2/PI489777)SNP_29315 | 859  | C | A | 66 | 83  | -- | --  |
| CakTC26423 | Ca(ICC2/PI489777)SNP_29316 | 525  | A | G | 3  | 4   | -- | --  |
|            | Ca(ICC2/PI489777)SNP_29317 | 1051 | C | A | 6  | 3   | -- | --  |
|            | Ca(ICC2/PI489777)SNP_29318 | 1125 | T | C | 12 | 3   | -- | --  |
|            | Ca(ICC2/PI489777)SNP_29319 | 1315 | G | A | 15 | 6   | -- | --  |
|            | Ca(ICC2/PI489777)SNP_29320 | 1676 | C | G | 9  | 5   | -- | --  |
|            | Ca(ICC2/PI489777)SNP_29321 | 1755 | A | G | 7  | 3   | -- | --  |
| CakTC27329 | Ca(ICC2/PI489777)SNP_29322 | 80   | A | C | 11 | 7   | -- | --  |
|            | Ca(ICC2/PI489777)SNP_29323 | 81   | T | C | 12 | 7   | -- | --  |
| CakTC26118 | Ca(ICC2/PI489777)SNP_29324 | 761  | G | A | 7  | 4   | -- | TPR |
|            | Ca(ICC2/PI489777)SNP_29325 | 830  | A | G | 8  | 3   | -- | TPR |
| CakTC39723 | Ca(ICC2/PI489777)SNP_29326 | 991  | G | A | 10 | 3   | -- | --  |
| CakTC24658 | Ca(ICC2/PI489777)SNP_29327 | 217  | C | T | 13 | 7   | -- | --  |
|            | Ca(ICC2/PI489777)SNP_29328 | 363  | C | A | 35 | 17  | -- | --  |
|            | Ca(ICC2/PI489777)SNP_29329 | 1184 | A | T | 90 | 24  | -- | --  |
| CakTC24147 | Ca(ICC2/PI489777)SNP_29330 | 222  | G | A | 5  | 4   | -- | --  |
|            | Ca(ICC2/PI489777)SNP_29331 | 245  | T | C | 5  | 4   | -- | --  |
|            | Ca(ICC2/PI489777)SNP_29332 | 278  | G | C | 6  | 4   | -- | --  |
| CakTC41943 | Ca(ICC2/PI489777)SNP_29333 | 644  | T | A | 45 | 15  | -- | --  |
|            | Ca(ICC2/PI489777)SNP_29334 | 742  | C | G | 45 | 15  | -- | --  |
| CakTC11457 | Ca(ICC2/PI489777)SNP_29335 | 1643 | C | A | 9  | 8   | -- | --  |
|            | Ca(ICC2/PI489777)SNP_29336 | 2254 | G | A | 9  | 6   | -- | --  |
|            | Ca(ICC2/PI489777)SNP_29337 | 2435 | G | C | 12 | 10  | -- | --  |
| CakTC24002 | Ca(ICC2/PI489777)SNP_29338 | 3035 | G | A | 11 | 4   | -- | --  |
|            | Ca(ICC2/PI489777)SNP_29339 | 3572 | T | C | 7  | 3   | -- | --  |
| CakTC40796 | Ca(ICC2/PI489777)SNP_29340 | 147  | C | T | 5  | 3   | -- | --  |
| CakTC35417 | Ca(ICC2/PI489777)SNP_29341 | 2744 | A | G | 13 | 6   | -- | --  |
| CakTC22927 | Ca(ICC2/PI489777)SNP_29342 | 143  | G | T | 8  | 21  | -- | --  |
|            | Ca(ICC2/PI489777)SNP_29343 | 150  | T | C | 9  | 21  | -- | --  |
|            | Ca(ICC2/PI489777)SNP_29344 | 159  | G | C | 9  | 11  | -- | --  |
|            | Ca(ICC2/PI489777)SNP_29345 | 700  | G | A | 7  | 3   | -- | --  |
|            | Ca(ICC2/PI489777)SNP_29346 | 892  | C | T | 3  | 4   | -- | --  |
| CakTC38613 | Ca(ICC2/PI489777)SNP_29347 | 421  | A | T | 5  | 12  | -- | --  |
| CakTC34740 | Ca(ICC2/PI489777)SNP_29348 | 751  | A | G | 31 | 18  | -- | TPR |
|            | Ca(ICC2/PI489777)SNP_29349 | 1591 | A | G | 23 | 31  | -- | TPR |
| CakTC37726 | Ca(ICC2/PI489777)SNP_29350 | 177  | A | G | 6  | 8   | -- | --  |
|            | Ca(ICC2/PI489777)SNP_29351 | 189  | T | C | 7  | 9   | -- | --  |
|            | Ca(ICC2/PI489777)SNP_29352 | 237  | G | A | 8  | 13  | -- | --  |
|            | Ca(ICC2/PI489777)SNP_29353 | 254  | C | A | 9  | 12  | -- | --  |
|            | Ca(ICC2/PI489777)SNP_29354 | 456  | C | G | 14 | 19  | -- | --  |
|            | Ca(ICC2/PI489777)SNP_29355 | 486  | G | A | 15 | 20  | -- | --  |
|            | Ca(ICC2/PI489777)SNP_29356 | 492  | T | C | 17 | 20  | -- | --  |
|            | Ca(ICC2/PI489777)SNP_29357 | 605  | T | C | 18 | 16  | -- | --  |
|            | Ca(ICC2/PI489777)SNP_29358 | 624  | A | G | 16 | 20  | -- | --  |
|            | Ca(ICC2/PI489777)SNP_29359 | 924  | T | A | 21 | 11  | -- | --  |
| CakTC37443 | Ca(ICC2/PI489777)SNP_29360 | 291  | G | A | 6  | 14  | -- | --  |
|            | Ca(ICC2/PI489777)SNP_29361 | 697  | C | A | 5  | 7   | -- | --  |
| CakTC36238 | Ca(ICC2/PI489777)SNP_29362 | 477  | G | A | 21 | 19  | -- | C3H |
|            | Ca(ICC2/PI489777)SNP_29363 | 1782 | T | C | 49 | 27  | -- | C3H |
|            | Ca(ICC2/PI489777)SNP_29364 | 1965 | C | T | 47 | 16  | -- | C3H |
| CakTC34548 | Ca(ICC2/PI489777)SNP_29365 | 133  | T | G | 7  | 3   | -- | --  |
| CakTC39771 | Ca(ICC2/PI489777)SNP_29366 | 494  | G | A | 3  | 6   | -- | --  |
| CakTC29984 | Ca(ICC2/PI489777)SNP_29367 | 2171 | T | C | 6  | 4   | -- | --  |
|            | Ca(ICC2/PI489777)SNP_29368 | 2829 | G | A | 7  | 7   | -- | --  |
| CakTC35736 | Ca(ICC2/PI489777)SNP_29369 | 584  | C | T | 18 | 11  | -- | --  |
|            | Ca(ICC2/PI489777)SNP_29370 | 1526 | T | G | 19 | 14  | -- | --  |
|            | Ca(ICC2/PI489777)SNP_29371 | 1721 | G | A | 21 | 16  | -- | --  |
|            | Ca(ICC2/PI489777)SNP_29372 | 1791 | C | G | 26 | 23  | -- | --  |
|            | Ca(ICC2/PI489777)SNP_29373 | 2114 | T | A | 25 | 18  | -- | --  |

|            |                            |      |   |   |     |     |        |           |
|------------|----------------------------|------|---|---|-----|-----|--------|-----------|
|            | Ca(ICC2/PI489777)SNP_29374 | 2449 | G | T | 23  | 17  | --     | --        |
|            | Ca(ICC2/PI489777)SNP_29375 | 2654 | A | C | 23  | 17  | --     | --        |
|            | Ca(ICC2/PI489777)SNP_29376 | 3069 | G | T | 12  | 9   | --     | --        |
|            | Ca(ICC2/PI489777)SNP_29377 | 3160 | T | G | 10  | 7   | --     | --        |
| CakTC38999 | Ca(ICC2/PI489777)SNP_29378 | 106  | T | C | 3   | 6   | --     | --        |
|            | Ca(ICC2/PI489777)SNP_29379 | 253  | A | G | 9   | 13  | --     | --        |
|            | Ca(ICC2/PI489777)SNP_29380 | 622  | T | C | 18  | 13  | --     | --        |
|            | Ca(ICC2/PI489777)SNP_29381 | 649  | A | G | 18  | 19  | --     | --        |
|            | Ca(ICC2/PI489777)SNP_29382 | 1234 | C | T | 7   | 10  | --     | --        |
| CakTC43113 | Ca(ICC2/PI489777)SNP_29383 | 230  | G | T | 11  | 6   | --     | --        |
| CakTC02781 | Ca(ICC2/PI489777)SNP_29384 | 258  | T | C | 6   | 4   | --     | --        |
|            | Ca(ICC2/PI489777)SNP_29385 | 293  | G | A | 6   | 4   | --     | --        |
|            | Ca(ICC2/PI489777)SNP_29386 | 381  | G | T | 4   | 5   | --     | --        |
| CakTC38616 | Ca(ICC2/PI489777)SNP_29387 | 183  | C | G | 6   | 5   | --     | --        |
|            | Ca(ICC2/PI489777)SNP_29388 | 371  | G | T | 8   | 6   | --     | --        |
|            | Ca(ICC2/PI489777)SNP_29389 | 721  | C | T | 5   | 12  | --     | --        |
|            | Ca(ICC2/PI489777)SNP_29390 | 922  | G | A | 6   | 6   | --     | --        |
|            | Ca(ICC2/PI489777)SNP_29391 | 952  | T | G | 4   | 7   | --     | --        |
| CakTC41082 | Ca(ICC2/PI489777)SNP_29392 | 255  | C | T | 10  | 4   | --     | --        |
|            | Ca(ICC2/PI489777)SNP_29393 | 294  | C | T | 10  | 7   | --     | --        |
|            | Ca(ICC2/PI489777)SNP_29394 | 628  | A | G | 5   | 7   | --     | --        |
|            | Ca(ICC2/PI489777)SNP_29395 | 630  | G | A | 5   | 7   | --     | --        |
|            | Ca(ICC2/PI489777)SNP_29396 | 657  | T | C | 5   | 6   | --     | --        |
|            | Ca(ICC2/PI489777)SNP_29397 | 735  | G | A | 9   | 4   | --     | --        |
|            | Ca(ICC2/PI489777)SNP_29398 | 1431 | A | T | 16  | 5   | --     | --        |
|            | Ca(ICC2/PI489777)SNP_29399 | 1448 | G | A | 18  | 4   | --     | --        |
|            | Ca(ICC2/PI489777)SNP_29400 | 1499 | T | C | 16  | 4   | --     | --        |
|            | Ca(ICC2/PI489777)SNP_29401 | 1638 | C | T | 20  | 6   | --     | --        |
| CakTC43387 | Ca(ICC2/PI489777)SNP_29402 | 693  | C | G | 35  | 27  | --     | --        |
|            | Ca(ICC2/PI489777)SNP_29403 | 1540 | C | T | 123 | 107 | --     | --        |
|            | Ca(ICC2/PI489777)SNP_29404 | 1588 | A | G | 117 | 115 | --     | --        |
|            | Ca(ICC2/PI489777)SNP_29405 | 1702 | A | C | 118 | 113 | --     | --        |
|            | Ca(ICC2/PI489777)SNP_29406 | 1787 | T | C | 102 | 97  | --     | --        |
| CakTC38798 | Ca(ICC2/PI489777)SNP_29407 | 564  | C | T | 14  | 7   | --     | --        |
|            | Ca(ICC2/PI489777)SNP_29408 | 1223 | T | A | 3   | 4   | --     | --        |
| CakTC28880 | Ca(ICC2/PI489777)SNP_29409 | 349  | T | C | 7   | 3   | --     | --        |
| CakTC39576 | Ca(ICC2/PI489777)SNP_29410 | 116  | G | A | 6   | 7   | --     | --        |
|            | Ca(ICC2/PI489777)SNP_29411 | 672  | T | C | 12  | 3   | --     | --        |
|            | Ca(ICC2/PI489777)SNP_29412 | 768  | T | C | 16  | 3   | --     | --        |
| CakTC41946 | Ca(ICC2/PI489777)SNP_29413 | 1122 | C | T | 47  | 22  | --     | --        |
|            | Ca(ICC2/PI489777)SNP_29414 | 1177 | G | A | 44  | 21  | --     | --        |
|            | Ca(ICC2/PI489777)SNP_29415 | 1287 | C | T | 36  | 22  | --     | --        |
|            | Ca(ICC2/PI489777)SNP_29416 | 1513 | A | G | 22  | 16  | --     | --        |
|            | Ca(ICC2/PI489777)SNP_29417 | 1655 | G | C | 7   | 10  | --     | --        |
| CakTC29873 | Ca(ICC2/PI489777)SNP_29418 | 621  | T | G | 12  | 8   | Flower | bud       |
|            | Ca(ICC2/PI489777)SNP_29419 | 742  | G | A | 9   | 7   | Flower | bud       |
|            | Ca(ICC2/PI489777)SNP_29420 | 775  | T | C | 10  | 6   | Flower | bud       |
|            | Ca(ICC2/PI489777)SNP_29421 | 1490 | C | T | 21  | 6   | Flower | bud       |
|            | Ca(ICC2/PI489777)SNP_29422 | 1526 | C | T | 25  | 3   | Flower | bud       |
|            | Ca(ICC2/PI489777)SNP_29423 | 1553 | G | A | 26  | 6   | Flower | bud       |
| CakTC30634 | Ca(ICC2/PI489777)SNP_29424 | 866  | C | T | 4   | 6   | --     | --        |
|            | Ca(ICC2/PI489777)SNP_29425 | 1013 | G | A | 8   | 6   | --     | --        |
| CakTC32495 | Ca(ICC2/PI489777)SNP_29426 | 174  | G | A | 21  | 9   | --     | --        |
|            | Ca(ICC2/PI489777)SNP_29427 | 1330 | A | G | 31  | 19  | --     | --        |
| CakTC34223 | Ca(ICC2/PI489777)SNP_29428 | 207  | G | A | 16  | 3   | --     | --        |
|            | Ca(ICC2/PI489777)SNP_29429 | 347  | A | G | 17  | 4   | --     | --        |
|            | Ca(ICC2/PI489777)SNP_29430 | 1532 | A | C | 25  | 10  | --     | --        |
| CakTC24494 | Ca(ICC2/PI489777)SNP_29431 | 2109 | G | A | 43  | 21  | --     | --        |
|            | Ca(ICC2/PI489777)SNP_29432 | 2165 | T | C | 27  | 16  | --     | --        |
| CakTC12111 | Ca(ICC2/PI489777)SNP_29433 | 1473 | G | A | 21  | 4   | --     | --        |
| CakTC26920 | Ca(ICC2/PI489777)SNP_29434 | 1118 | A | G | 5   | 9   | --     | --        |
|            | Ca(ICC2/PI489777)SNP_29435 | 1387 | C | A | 4   | 4   | --     | --        |
| CakTC35901 | Ca(ICC2/PI489777)SNP_29436 | 153  | C | G | 7   | 5   | --     | --        |
|            | Ca(ICC2/PI489777)SNP_29437 | 355  | C | A | 6   | 4   | --     | --        |
|            | Ca(ICC2/PI489777)SNP_29438 | 1291 | A | C | 9   | 6   | --     | --        |
|            | Ca(ICC2/PI489777)SNP_29439 | 1296 | T | A | 9   | 6   | --     | --        |
| CakTC39453 | Ca(ICC2/PI489777)SNP_29440 | 531  | G | A | 61  | 28  | Flower | bud       |
| CakTC24903 | Ca(ICC2/PI489777)SNP_29441 | 616  | C | T | 26  | 10  | --     | AP2-EREBP |
| CakTC27034 | Ca(ICC2/PI489777)SNP_29442 | 152  | G | T | 28  | 13  | --     | --        |
| CakTC22922 | Ca(ICC2/PI489777)SNP_29443 | 364  | C | T | 9   | 40  | --     | --        |
|            | Ca(ICC2/PI489777)SNP_29444 | 420  | C | T | 16  | 47  | --     | --        |
|            | Ca(ICC2/PI489777)SNP_29445 | 572  | T | C | 32  | 94  | --     | --        |
|            | Ca(ICC2/PI489777)SNP_29446 | 632  | A | G | 39  | 117 | --     | --        |
|            | Ca(ICC2/PI489777)SNP_29447 | 839  | C | T | 37  | 120 | --     | --        |

|            |                             |      |   |   |    |     |    |       |
|------------|-----------------------------|------|---|---|----|-----|----|-------|
|            | Ca(ICCV2/PI489777)SNP_29448 | 860  | T | C | 42 | 129 | -- | --    |
|            | Ca(ICCV2/PI489777)SNP_29449 | 980  | C | A | 34 | 122 | -- | --    |
|            | Ca(ICCV2/PI489777)SNP_29450 | 1979 | A | C | 30 | 101 | -- | --    |
|            | Ca(ICCV2/PI489777)SNP_29451 | 2009 | G | T | 30 | 110 | -- | --    |
|            | Ca(ICCV2/PI489777)SNP_29452 | 2033 | C | T | 28 | 83  | -- | --    |
| CakTC23161 | Ca(ICCV2/PI489777)SNP_29453 | 1628 | A | G | 18 | 14  | -- | --    |
| CakTC42664 | Ca(ICCV2/PI489777)SNP_29454 | 668  | G | A | 8  | 4   | -- | --    |
|            | Ca(ICCV2/PI489777)SNP_29455 | 700  | T | C | 8  | 4   | -- | --    |
| CakTC28452 | Ca(ICCV2/PI489777)SNP_29456 | 293  | G | A | 26 | 22  | -- | --    |
|            | Ca(ICCV2/PI489777)SNP_29457 | 686  | A | G | 32 | 40  | -- | --    |
|            | Ca(ICCV2/PI489777)SNP_29458 | 1358 | G | A | 20 | 22  | -- | --    |
| CakTC37235 | Ca(ICCV2/PI489777)SNP_29459 | 152  | T | A | 6  | 6   | -- | CCAAT |
| CakTC38607 | Ca(ICCV2/PI489777)SNP_29460 | 853  | A | G | 38 | 31  | -- | --    |
| CakTC40292 | Ca(ICCV2/PI489777)SNP_29461 | 16   | C | T | 6  | 3   | -- | --    |
|            | Ca(ICCV2/PI489777)SNP_29462 | 577  | T | C | 11 | 12  | -- | --    |
| CakTC37374 | Ca(ICCV2/PI489777)SNP_29463 | 484  | C | T | 12 | 8   | -- | --    |
|            | Ca(ICCV2/PI489777)SNP_29464 | 593  | T | C | 16 | 4   | -- | --    |
| CakTC36323 | Ca(ICCV2/PI489777)SNP_29465 | 2848 | A | G | 4  | 3   | -- | --    |
| CakTC41240 | Ca(ICCV2/PI489777)SNP_29466 | 53   | C | T | 5  | 3   | -- | --    |
|            | Ca(ICCV2/PI489777)SNP_29467 | 70   | A | G | 6  | 4   | -- | --    |
|            | Ca(ICCV2/PI489777)SNP_29468 | 106  | G | A | 7  | 4   | -- | --    |
|            | Ca(ICCV2/PI489777)SNP_29469 | 124  | G | C | 36 | 12  | -- | --    |
|            | Ca(ICCV2/PI489777)SNP_29470 | 390  | A | C | 62 | 39  | -- | --    |
| CakTC24545 | Ca(ICCV2/PI489777)SNP_29471 | 258  | T | C | 25 | 10  | -- | --    |
|            | Ca(ICCV2/PI489777)SNP_29472 | 2131 | C | T | 7  | 7   | -- | --    |
|            | Ca(ICCV2/PI489777)SNP_29473 | 2139 | A | G | 7  | 7   | -- | --    |
|            | Ca(ICCV2/PI489777)SNP_29474 | 2145 | C | T | 7  | 7   | -- | --    |
|            | Ca(ICCV2/PI489777)SNP_29475 | 2182 | A | G | 6  | 8   | -- | --    |
|            | Ca(ICCV2/PI489777)SNP_29476 | 2206 | C | T | 6  | 7   | -- | --    |
|            | Ca(ICCV2/PI489777)SNP_29477 | 3409 | G | A | 10 | 12  | -- | --    |
|            | Ca(ICCV2/PI489777)SNP_29478 | 3471 | A | G | 5  | 4   | -- | --    |
| CakTC13310 | Ca(ICCV2/PI489777)SNP_29479 | 392  | A | G | 4  | 6   | -- | --    |
| CakTC37336 | Ca(ICCV2/PI489777)SNP_29480 | 641  | C | T | 39 | 25  | -- | --    |
| CakTC28943 | Ca(ICCV2/PI489777)SNP_29481 | 309  | G | A | 28 | 8   | -- | --    |
|            | Ca(ICCV2/PI489777)SNP_29482 | 519  | T | G | 25 | 4   | -- | --    |
| CakTC42524 | Ca(ICCV2/PI489777)SNP_29483 | 334  | A | T | 49 | 15  | -- | --    |
| CakTC33707 | Ca(ICCV2/PI489777)SNP_29484 | 1191 | A | C | 15 | 8   | -- | --    |
|            | Ca(ICCV2/PI489777)SNP_29485 | 1209 | C | T | 16 | 8   | -- | --    |
|            | Ca(ICCV2/PI489777)SNP_29486 | 1227 | T | C | 17 | 8   | -- | --    |
|            | Ca(ICCV2/PI489777)SNP_29487 | 1380 | A | G | 16 | 4   | -- | --    |
| CakTC36329 | Ca(ICCV2/PI489777)SNP_29488 | 108  | C | A | 9  | 3   | -- | --    |
|            | Ca(ICCV2/PI489777)SNP_29489 | 199  | T | C | 12 | 5   | -- | --    |
|            | Ca(ICCV2/PI489777)SNP_29490 | 984  | A | T | 33 | 17  | -- | --    |
|            | Ca(ICCV2/PI489777)SNP_29491 | 1923 | A | G | 37 | 19  | -- | --    |
|            | Ca(ICCV2/PI489777)SNP_29492 | 3147 | A | G | 18 | 21  | -- | --    |
|            | Ca(ICCV2/PI489777)SNP_29493 | 3369 | G | A | 21 | 10  | -- | --    |
|            | Ca(ICCV2/PI489777)SNP_29494 | 4434 | T | C | 11 | 5   | -- | --    |
| CakTC41426 | Ca(ICCV2/PI489777)SNP_29495 | 693  | A | G | 16 | 10  | -- | --    |
|            | Ca(ICCV2/PI489777)SNP_29496 | 1332 | C | T | 20 | 13  | -- | --    |
|            | Ca(ICCV2/PI489777)SNP_29497 | 1368 | G | A | 14 | 12  | -- | --    |
|            | Ca(ICCV2/PI489777)SNP_29498 | 1374 | A | G | 18 | 9   | -- | --    |
|            | Ca(ICCV2/PI489777)SNP_29499 | 1407 | A | G | 19 | 11  | -- | --    |
|            | Ca(ICCV2/PI489777)SNP_29500 | 1481 | T | C | 20 | 4   | -- | --    |
|            | Ca(ICCV2/PI489777)SNP_29501 | 1971 | T | C | 9  | 8   | -- | --    |
| CakTC38031 | Ca(ICCV2/PI489777)SNP_29502 | 162  | C | T | 4  | 5   | -- | --    |
|            | Ca(ICCV2/PI489777)SNP_29503 | 640  | G | A | 12 | 11  | -- | --    |
|            | Ca(ICCV2/PI489777)SNP_29504 | 1229 | G | A | 26 | 4   | -- | --    |
|            | Ca(ICCV2/PI489777)SNP_29505 | 1312 | A | G | 22 | 4   | -- | --    |
|            | Ca(ICCV2/PI489777)SNP_29506 | 1362 | T | G | 24 | 3   | -- | --    |
| CakTC41023 | Ca(ICCV2/PI489777)SNP_29507 | 167  | C | G | 21 | 3   | -- | --    |
|            | Ca(ICCV2/PI489777)SNP_29508 | 170  | G | T | 21 | 3   | -- | --    |
|            | Ca(ICCV2/PI489777)SNP_29509 | 440  | C | A | 9  | 4   | -- | --    |
| CakTC33189 | Ca(ICCV2/PI489777)SNP_29510 | 405  | C | G | 6  | 3   | -- | --    |
|            | Ca(ICCV2/PI489777)SNP_29511 | 617  | G | A | 8  | 4   | -- | --    |
|            | Ca(ICCV2/PI489777)SNP_29512 | 1710 | A | T | 9  | 4   | -- | --    |
|            | Ca(ICCV2/PI489777)SNP_29513 | 1916 | G | C | 8  | 5   | -- | --    |
|            | Ca(ICCV2/PI489777)SNP_29514 | 1951 | C | G | 6  | 4   | -- | --    |
| CakTC25028 | Ca(ICCV2/PI489777)SNP_29515 | 870  | T | A | 18 | 16  | -- | --    |
|            | Ca(ICCV2/PI489777)SNP_29516 | 2012 | A | T | 4  | 5   | -- | --    |
|            | Ca(ICCV2/PI489777)SNP_29517 | 2020 | C | T | 7  | 5   | -- | --    |
|            | Ca(ICCV2/PI489777)SNP_29518 | 2108 | C | G | 7  | 5   | -- | --    |
| CakTC38708 | Ca(ICCV2/PI489777)SNP_29519 | 239  | A | C | 31 | 37  | -- | --    |
|            | Ca(ICCV2/PI489777)SNP_29520 | 397  | C | T | 44 | 43  | -- | --    |
| CakTC11747 | Ca(ICCV2/PI489777)SNP_29521 | 621  | A | G | 6  | 3   | -- | --    |

|            |                             |      |   |   |    |    |    |           |
|------------|-----------------------------|------|---|---|----|----|----|-----------|
|            | Ca(ICCV2/PI489777)SNP_29522 | 989  | A | G | 15 | 3  | -- | --        |
| CakTC39939 | Ca(ICCV2/PI489777)SNP_29523 | 628  | G | T | 4  | 5  | -- | C2C2-GATA |
|            | Ca(ICCV2/PI489777)SNP_29524 | 1036 | C | T | 6  | 4  | -- | C2C2-GATA |
|            | Ca(ICCV2/PI489777)SNP_29525 | 1259 | G | T | 3  | 3  | -- | C2C2-GATA |
| CakTC42558 | Ca(ICCV2/PI489777)SNP_29526 | 202  | A | T | 21 | 8  | -- | C2H2      |
|            | Ca(ICCV2/PI489777)SNP_29527 | 754  | G | A | 30 | 3  | -- | C2H2      |
| CakTC30299 | Ca(ICCV2/PI489777)SNP_29528 | 151  | G | A | 3  | 6  | -- | --        |
|            | Ca(ICCV2/PI489777)SNP_29529 | 366  | G | A | 4  | 3  | -- | --        |
|            | Ca(ICCV2/PI489777)SNP_29530 | 398  | A | C | 4  | 3  | -- | --        |
| CakTC35088 | Ca(ICCV2/PI489777)SNP_29531 | 352  | C | A | 4  | 4  | -- | --        |
| CakTC11390 | Ca(ICCV2/PI489777)SNP_29532 | 411  | A | G | 13 | 4  | -- | --        |
|            | Ca(ICCV2/PI489777)SNP_29533 | 897  | A | G | 18 | 19 | -- | --        |
|            | Ca(ICCV2/PI489777)SNP_29534 | 1155 | C | T | 26 | 12 | -- | --        |
|            | Ca(ICCV2/PI489777)SNP_29535 | 1374 | G | T | 17 | 7  | -- | --        |
| CakTC25554 | Ca(ICCV2/PI489777)SNP_29536 | 452  | T | C | 43 | 9  | -- | --        |
|            | Ca(ICCV2/PI489777)SNP_29537 | 570  | G | C | 34 | 7  | -- | --        |
|            | Ca(ICCV2/PI489777)SNP_29538 | 571  | C | A | 34 | 7  | -- | --        |
|            | Ca(ICCV2/PI489777)SNP_29539 | 914  | G | A | 40 | 25 | -- | --        |
|            | Ca(ICCV2/PI489777)SNP_29540 | 1175 | A | G | 76 | 30 | -- | --        |
| CakTC40170 | Ca(ICCV2/PI489777)SNP_29541 | 1036 | G | T | 14 | 7  | -- | --        |
| CakTC39809 | Ca(ICCV2/PI489777)SNP_29542 | 231  | C | T | 20 | 24 | -- | --        |
|            | Ca(ICCV2/PI489777)SNP_29543 | 342  | C | A | 16 | 24 | -- | --        |
|            | Ca(ICCV2/PI489777)SNP_29544 | 948  | G | C | 28 | 9  | -- | --        |
|            | Ca(ICCV2/PI489777)SNP_29545 | 994  | G | A | 23 | 5  | -- | --        |
|            | Ca(ICCV2/PI489777)SNP_29546 | 1023 | A | G | 23 | 6  | -- | --        |
|            | Ca(ICCV2/PI489777)SNP_29547 | 1035 | C | A | 23 | 6  | -- | --        |
| CakTC40869 | Ca(ICCV2/PI489777)SNP_29548 | 362  | A | G | 80 | 38 | -- | CCHC      |
| CakTC29836 | Ca(ICCV2/PI489777)SNP_29549 | 781  | G | T | 4  | 3  | -- | --        |
|            | Ca(ICCV2/PI489777)SNP_29550 | 796  | C | T | 4  | 3  | -- | --        |
|            | Ca(ICCV2/PI489777)SNP_29551 | 802  | G | A | 3  | 3  | -- | --        |
|            | Ca(ICCV2/PI489777)SNP_29552 | 950  | T | C | 6  | 4  | -- | --        |
|            | Ca(ICCV2/PI489777)SNP_29553 | 1111 | C | T | 6  | 3  | -- | --        |
|            | Ca(ICCV2/PI489777)SNP_29554 | 2057 | C | T | 15 | 6  | -- | --        |
|            | Ca(ICCV2/PI489777)SNP_29555 | 2088 | A | T | 14 | 6  | -- | --        |
|            | Ca(ICCV2/PI489777)SNP_29556 | 2093 | T | A | 15 | 6  | -- | --        |
|            | Ca(ICCV2/PI489777)SNP_29557 | 3057 | G | A | 7  | 7  | -- | --        |
|            | Ca(ICCV2/PI489777)SNP_29558 | 3217 | C | T | 5  | 4  | -- | --        |
|            | Ca(ICCV2/PI489777)SNP_29559 | 3226 | T | C | 3  | 4  | -- | --        |
| CakTC06249 | Ca(ICCV2/PI489777)SNP_29560 | 330  | G | A | 9  | 7  | -- | --        |
|            | Ca(ICCV2/PI489777)SNP_29561 | 334  | G | A | 8  | 8  | -- | --        |
|            | Ca(ICCV2/PI489777)SNP_29562 | 382  | G | A | 12 | 7  | -- | --        |
|            | Ca(ICCV2/PI489777)SNP_29563 | 460  | T | A | 13 | 7  | -- | --        |
|            | Ca(ICCV2/PI489777)SNP_29564 | 595  | G | A | 10 | 14 | -- | --        |
|            | Ca(ICCV2/PI489777)SNP_29565 | 724  | A | G | 15 | 14 | -- | --        |
|            | Ca(ICCV2/PI489777)SNP_29566 | 1045 | T | A | 9  | 13 | -- | --        |
| CakTC29030 | Ca(ICCV2/PI489777)SNP_29567 | 95   | C | T | 7  | 3  | -- | --        |
| CakTC28005 | Ca(ICCV2/PI489777)SNP_29568 | 233  | T | A | 14 | 14 | -- | --        |
| CakTC32153 | Ca(ICCV2/PI489777)SNP_29569 | 864  | C | T | 40 | 37 | -- | --        |
|            | Ca(ICCV2/PI489777)SNP_29570 | 934  | G | C | 13 | 19 | -- | --        |
|            | Ca(ICCV2/PI489777)SNP_29571 | 938  | A | T | 20 | 12 | -- | --        |
|            | Ca(ICCV2/PI489777)SNP_29572 | 1044 | A | G | 19 | 9  | -- | --        |
|            | Ca(ICCV2/PI489777)SNP_29573 | 1340 | C | A | 33 | 26 | -- | --        |
|            | Ca(ICCV2/PI489777)SNP_29574 | 1573 | T | G | 3  | 3  | -- | --        |
| CakTC38667 | Ca(ICCV2/PI489777)SNP_29575 | 577  | A | G | 3  | 26 | -- | MYB       |
|            | Ca(ICCV2/PI489777)SNP_29576 | 724  | T | C | 6  | 10 | -- | MYB       |
|            | Ca(ICCV2/PI489777)SNP_29577 | 898  | G | A | 11 | 9  | -- | MYB       |
| CakTC11450 | Ca(ICCV2/PI489777)SNP_29578 | 617  | T | C | 4  | 4  | -- | --        |
|            | Ca(ICCV2/PI489777)SNP_29579 | 1184 | T | C | 5  | 4  | -- | --        |
|            | Ca(ICCV2/PI489777)SNP_29580 | 1340 | C | T | 11 | 6  | -- | --        |
|            | Ca(ICCV2/PI489777)SNP_29581 | 1461 | T | G | 11 | 10 | -- | --        |
|            | Ca(ICCV2/PI489777)SNP_29582 | 1569 | G | T | 11 | 5  | -- | --        |
|            | Ca(ICCV2/PI489777)SNP_29583 | 1604 | T | C | 11 | 5  | -- | --        |
|            | Ca(ICCV2/PI489777)SNP_29584 | 1609 | T | G | 11 | 5  | -- | --        |
|            | Ca(ICCV2/PI489777)SNP_29585 | 1632 | G | A | 9  | 5  | -- | --        |
| CakTC27768 | Ca(ICCV2/PI489777)SNP_29586 | 1250 | T | A | 16 | 16 | -- | --        |
|            | Ca(ICCV2/PI489777)SNP_29587 | 1706 | T | C | 12 | 11 | -- | --        |
| CakTC37861 | Ca(ICCV2/PI489777)SNP_29588 | 986  | T | C | 10 | 6  | -- | --        |
|            | Ca(ICCV2/PI489777)SNP_29589 | 1485 | G | C | 15 | 5  | -- | --        |
|            | Ca(ICCV2/PI489777)SNP_29590 | 1519 | G | C | 12 | 5  | -- | --        |
| CakTC32101 | Ca(ICCV2/PI489777)SNP_29591 | 379  | A | G | 21 | 10 | -- | --        |
|            | Ca(ICCV2/PI489777)SNP_29592 | 687  | T | C | 17 | 9  | -- | --        |
|            | Ca(ICCV2/PI489777)SNP_29593 | 823  | T | G | 16 | 4  | -- | --        |
| CakTC31517 | Ca(ICCV2/PI489777)SNP_29594 | 427  | A | G | 33 | 9  | -- | --        |
|            | Ca(ICCV2/PI489777)SNP_29595 | 459  | G | T | 26 | 5  | -- | --        |



|            |                            |      |   |   |     |    |       |      |
|------------|----------------------------|------|---|---|-----|----|-------|------|
|            | Ca(ICC2/PI489777)SNP_29596 | 2149 | G | A | 11  | 9  | --    | --   |
|            | Ca(ICC2/PI489777)SNP_29597 | 2209 | G | A | 12  | 10 | --    | --   |
| CakTC40965 | Ca(ICC2/PI489777)SNP_29598 | 677  | A | C | 11  | 6  | --    | --   |
|            | Ca(ICC2/PI489777)SNP_29599 | 871  | G | A | 6   | 6  | --    | --   |
|            | Ca(ICC2/PI489777)SNP_29600 | 897  | T | C | 7   | 8  | --    | --   |
|            | Ca(ICC2/PI489777)SNP_29601 | 1735 | T | C | 5   | 7  | --    | --   |
| CakTC23955 | Ca(ICC2/PI489777)SNP_29602 | 170  | C | T | 8   | 4  | --    | --   |
| CakTC24204 | Ca(ICC2/PI489777)SNP_29603 | 1043 | G | C | 149 | 67 | --    | --   |
| CakTC40886 | Ca(ICC2/PI489777)SNP_29604 | 299  | C | T | 19  | 9  | --    | --   |
| CakTC27433 | Ca(ICC2/PI489777)SNP_29605 | 1814 | A | G | 16  | 8  | --    | --   |
| CakTC34723 | Ca(ICC2/PI489777)SNP_29606 | 1110 | A | G | 3   | 3  | --    | --   |
|            | Ca(ICC2/PI489777)SNP_29607 | 1164 | G | A | 3   | 3  | --    | --   |
| CakTC26363 | Ca(ICC2/PI489777)SNP_29608 | 336  | T | A | 23  | 11 | --    | --   |
|            | Ca(ICC2/PI489777)SNP_29609 | 372  | A | T | 20  | 11 | --    | --   |
|            | Ca(ICC2/PI489777)SNP_29610 | 376  | C | T | 24  | 10 | --    | --   |
|            | Ca(ICC2/PI489777)SNP_29611 | 725  | C | T | 9   | 3  | --    | --   |
|            | Ca(ICC2/PI489777)SNP_29612 | 747  | C | T | 8   | 3  | --    | --   |
|            | Ca(ICC2/PI489777)SNP_29613 | 923  | A | G | 12  | 8  | --    | --   |
|            | Ca(ICC2/PI489777)SNP_29614 | 961  | A | G | 11  | 8  | --    | --   |
|            | Ca(ICC2/PI489777)SNP_29615 | 988  | C | T | 13  | 8  | --    | --   |
| CakTC38529 | Ca(ICC2/PI489777)SNP_29616 | 158  | T | A | 3   | 5  | --    | --   |
|            | Ca(ICC2/PI489777)SNP_29617 | 297  | A | G | 3   | 6  | --    | --   |
|            | Ca(ICC2/PI489777)SNP_29618 | 325  | G | A | 3   | 5  | --    | --   |
|            | Ca(ICC2/PI489777)SNP_29619 | 429  | A | G | 4   | 5  | --    | --   |
| CakTC29732 | Ca(ICC2/PI489777)SNP_29620 | 789  | A | T | 3   | 4  | Shoot | --   |
| CakTC29024 | Ca(ICC2/PI489777)SNP_29621 | 355  | G | A | 17  | 5  | --    | --   |
| CakTC41577 | Ca(ICC2/PI489777)SNP_29622 | 1475 | C | T | 10  | 3  | --    | SNF2 |
|            | Ca(ICC2/PI489777)SNP_29623 | 2129 | A | G | 4   | 3  | --    | SNF2 |
| CakTC42585 | Ca(ICC2/PI489777)SNP_29624 | 197  | G | C | 14  | 5  | --    | --   |
|            | Ca(ICC2/PI489777)SNP_29625 | 220  | G | A | 16  | 5  | --    | --   |
|            | Ca(ICC2/PI489777)SNP_29626 | 272  | C | T | 17  | 4  | --    | --   |
| CakTC37852 | Ca(ICC2/PI489777)SNP_29627 | 407  | A | G | 21  | 16 | --    | --   |
|            | Ca(ICC2/PI489777)SNP_29628 | 1164 | G | T | 6   | 5  | --    | --   |
| CakTC35235 | Ca(ICC2/PI489777)SNP_29629 | 1300 | A | C | 68  | 31 | --    | --   |
|            | Ca(ICC2/PI489777)SNP_29630 | 1503 | A | G | 78  | 39 | --    | --   |
|            | Ca(ICC2/PI489777)SNP_29631 | 2081 | A | C | 67  | 25 | --    | --   |
| CakTC25868 | Ca(ICC2/PI489777)SNP_29632 | 891  | C | T | 20  | 10 | --    | --   |
| CakTC23549 | Ca(ICC2/PI489777)SNP_29633 | 450  | C | T | 101 | 51 | --    | --   |
| CakTC40284 | Ca(ICC2/PI489777)SNP_29634 | 431  | A | G | 53  | 45 | --    | --   |
|            | Ca(ICC2/PI489777)SNP_29635 | 460  | A | G | 62  | 48 | --    | --   |
|            | Ca(ICC2/PI489777)SNP_29636 | 504  | C | G | 46  | 26 | --    | --   |
|            | Ca(ICC2/PI489777)SNP_29637 | 538  | C | T | 38  | 37 | --    | --   |
| CakTC38791 | Ca(ICC2/PI489777)SNP_29638 | 99   | T | C | 7   | 3  | --    | --   |
|            | Ca(ICC2/PI489777)SNP_29639 | 109  | C | T | 7   | 3  | --    | --   |
|            | Ca(ICC2/PI489777)SNP_29640 | 134  | A | G | 8   | 3  | --    | --   |
|            | Ca(ICC2/PI489777)SNP_29641 | 153  | T | C | 8   | 3  | --    | --   |
|            | Ca(ICC2/PI489777)SNP_29642 | 301  | G | A | 6   | 7  | --    | --   |
| CakTC41134 | Ca(ICC2/PI489777)SNP_29643 | 901  | T | C | 10  | 10 | --    | --   |
| CakTC42465 | Ca(ICC2/PI489777)SNP_29644 | 1707 | T | C | 4   | 4  | --    | --   |
| CakTC43005 | Ca(ICC2/PI489777)SNP_29645 | 1439 | G | A | 7   | 7  | --    | --   |
| CakTC31807 | Ca(ICC2/PI489777)SNP_29646 | 145  | C | T | 10  | 15 | --    | --   |
|            | Ca(ICC2/PI489777)SNP_29647 | 370  | A | G | 4   | 20 | --    | --   |
| CakTC31203 | Ca(ICC2/PI489777)SNP_29648 | 344  | C | G | 3   | 5  | --    | --   |
| CakTC29468 | Ca(ICC2/PI489777)SNP_29649 | 1066 | C | A | 3   | 4  | --    | --   |
| CakTC08884 | Ca(ICC2/PI489777)SNP_29650 | 1485 | T | C | 5   | 14 | --    | --   |
|            | Ca(ICC2/PI489777)SNP_29651 | 1599 | A | G | 7   | 17 | --    | --   |
|            | Ca(ICC2/PI489777)SNP_29652 | 1674 | C | T | 8   | 18 | --    | --   |
| CakTC39292 | Ca(ICC2/PI489777)SNP_29653 | 665  | G | A | 18  | 15 | --    | --   |
|            | Ca(ICC2/PI489777)SNP_29654 | 1322 | T | C | 4   | 14 | --    | --   |
| CakTC37544 | Ca(ICC2/PI489777)SNP_29655 | 259  | C | T | 52  | 20 | --    | --   |
|            | Ca(ICC2/PI489777)SNP_29656 | 337  | A | C | 49  | 23 | --    | --   |
|            | Ca(ICC2/PI489777)SNP_29657 | 403  | T | C | 49  | 16 | --    | --   |
|            | Ca(ICC2/PI489777)SNP_29658 | 406  | T | G | 49  | 18 | --    | --   |
|            | Ca(ICC2/PI489777)SNP_29659 | 649  | G | A | 53  | 20 | --    | --   |
|            | Ca(ICC2/PI489777)SNP_29660 | 688  | G | A | 53  | 28 | --    | --   |
| CakTC30082 | Ca(ICC2/PI489777)SNP_29661 | 340  | A | C | 10  | 90 | --    | --   |
| CakTC07915 | Ca(ICC2/PI489777)SNP_29662 | 411  | C | T | 4   | 4  | --    | --   |
| CakTC41482 | Ca(ICC2/PI489777)SNP_29663 | 485  | A | G | 3   | 4  | --    | --   |
| CakTC30594 | Ca(ICC2/PI489777)SNP_29664 | 1134 | T | C | 5   | 13 | --    | --   |
|            | Ca(ICC2/PI489777)SNP_29665 | 1860 | C | G | 4   | 11 | --    | --   |
|            | Ca(ICC2/PI489777)SNP_29666 | 3190 | A | G | 3   | 5  | --    | --   |
| CakTC39531 | Ca(ICC2/PI489777)SNP_29667 | 954  | C | G | 67  | 31 | --    | --   |
|            | Ca(ICC2/PI489777)SNP_29668 | 991  | G | A | 71  | 34 | --    | --   |
| CakTC27012 | Ca(ICC2/PI489777)SNP_29669 | 1167 | T | G | 7   | 8  | --    | CCHC |

|            |                             |      |   |   |    |    |    |              |
|------------|-----------------------------|------|---|---|----|----|----|--------------|
|            | Ca(ICCV2/PI489777)SNP_29670 | 1606 | T | C | 6  | 8  | -- | CCHC         |
|            | Ca(ICCV2/PI489777)SNP_29671 | 1686 | C | T | 7  | 7  | -- | CCHC         |
|            | Ca(ICCV2/PI489777)SNP_29672 | 1952 | C | T | 6  | 5  | -- | CCHC         |
| CakTC09836 | Ca(ICCV2/PI489777)SNP_29673 | 2526 | C | T | 3  | 3  | -- | --           |
|            | Ca(ICCV2/PI489777)SNP_29674 | 2853 | C | T | 3  | 4  | -- | --           |
| CakTC37721 | Ca(ICCV2/PI489777)SNP_29675 | 700  | T | C | 8  | 9  | -- | --           |
| CakTC38384 | Ca(ICCV2/PI489777)SNP_29676 | 7    | T | C | 9  | 11 | -- | --           |
|            | Ca(ICCV2/PI489777)SNP_29677 | 1077 | T | G | 6  | 19 | -- | --           |
| CakTC28660 | Ca(ICCV2/PI489777)SNP_29678 | 686  | C | T | 5  | 5  | -- | --           |
|            | Ca(ICCV2/PI489777)SNP_29679 | 954  | A | T | 4  | 9  | -- | --           |
|            | Ca(ICCV2/PI489777)SNP_29680 | 1086 | T | C | 5  | 11 | -- | --           |
|            | Ca(ICCV2/PI489777)SNP_29681 | 1925 | G | A | 17 | 3  | -- | --           |
| CakTC37306 | Ca(ICCV2/PI489777)SNP_29682 | 24   | C | T | 6  | 10 | -- | --           |
| CakTC43028 | Ca(ICCV2/PI489777)SNP_29683 | 519  | T | C | 9  | 3  | -- | --           |
|            | Ca(ICCV2/PI489777)SNP_29684 | 855  | G | A | 11 | 4  | -- | --           |
| CakTC37133 | Ca(ICCV2/PI489777)SNP_29685 | 160  | A | C | 35 | 34 | -- | --           |
| CakTC37908 | Ca(ICCV2/PI489777)SNP_29686 | 166  | T | A | 35 | 30 | -- | --           |
|            | Ca(ICCV2/PI489777)SNP_29687 | 168  | T | C | 34 | 29 | -- | --           |
|            | Ca(ICCV2/PI489777)SNP_29688 | 186  | T | C | 36 | 21 | -- | --           |
|            | Ca(ICCV2/PI489777)SNP_29689 | 230  | T | C | 33 | 17 | -- | --           |
|            | Ca(ICCV2/PI489777)SNP_29690 | 310  | A | G | 40 | 24 | -- | --           |
|            | Ca(ICCV2/PI489777)SNP_29691 | 448  | G | T | 27 | 24 | -- | --           |
|            | Ca(ICCV2/PI489777)SNP_29692 | 619  | T | C | 16 | 9  | -- | --           |
| CakTC31980 | Ca(ICCV2/PI489777)SNP_29693 | 220  | G | A | 38 | 8  | -- | --           |
|            | Ca(ICCV2/PI489777)SNP_29694 | 632  | T | C | 18 | 9  | -- | --           |
|            | Ca(ICCV2/PI489777)SNP_29695 | 1079 | A | G | 27 | 8  | -- | --           |
|            | Ca(ICCV2/PI489777)SNP_29696 | 1136 | C | T | 26 | 9  | -- | --           |
|            | Ca(ICCV2/PI489777)SNP_29697 | 1187 | G | A | 15 | 5  | -- | --           |
| CakTC27336 | Ca(ICCV2/PI489777)SNP_29698 | 1094 | C | T | 14 | 6  | -- | --           |
|            | Ca(ICCV2/PI489777)SNP_29699 | 1168 | T | C | 12 | 8  | -- | --           |
|            | Ca(ICCV2/PI489777)SNP_29700 | 1336 | T | C | 13 | 5  | -- | --           |
| CakTC42787 | Ca(ICCV2/PI489777)SNP_29701 | 97   | G | T | 3  | 3  | -- | --           |
|            | Ca(ICCV2/PI489777)SNP_29702 | 316  | G | C | 4  | 10 | -- | --           |
|            | Ca(ICCV2/PI489777)SNP_29703 | 403  | A | T | 5  | 10 | -- | --           |
|            | Ca(ICCV2/PI489777)SNP_29704 | 1081 | T | C | 12 | 10 | -- | --           |
|            | Ca(ICCV2/PI489777)SNP_29705 | 1165 | T | G | 11 | 9  | -- | --           |
|            | Ca(ICCV2/PI489777)SNP_29706 | 1456 | T | A | 5  | 12 | -- | --           |
|            | Ca(ICCV2/PI489777)SNP_29707 | 1578 | G | C | 4  | 6  | -- | --           |
| CakTC36288 | Ca(ICCV2/PI489777)SNP_29708 | 1008 | A | G | 5  | 9  | -- | --           |
|            | Ca(ICCV2/PI489777)SNP_29709 | 1351 | G | A | 8  | 9  | -- | --           |
|            | Ca(ICCV2/PI489777)SNP_29710 | 1646 | G | T | 11 | 6  | -- | --           |
|            | Ca(ICCV2/PI489777)SNP_29711 | 1680 | G | T | 8  | 5  | -- | --           |
|            | Ca(ICCV2/PI489777)SNP_29712 | 1693 | G | A | 8  | 5  | -- | --           |
|            | Ca(ICCV2/PI489777)SNP_29713 | 2211 | T | G | 6  | 5  | -- | --           |
|            | Ca(ICCV2/PI489777)SNP_29714 | 2659 | A | G | 8  | 9  | -- | --           |
|            | Ca(ICCV2/PI489777)SNP_29715 | 3427 | A | G | 10 | 7  | -- | --           |
| CakTC11377 | Ca(ICCV2/PI489777)SNP_29716 | 158  | G | T | 9  | 5  | -- | --           |
| CakTC24381 | Ca(ICCV2/PI489777)SNP_29717 | 184  | G | A | 4  | 4  | -- | --           |
| CakTC25036 | Ca(ICCV2/PI489777)SNP_29718 | 330  | C | T | 9  | 6  | -- | WRKY         |
|            | Ca(ICCV2/PI489777)SNP_29719 | 508  | C | G | 8  | 3  | -- | WRKY         |
|            | Ca(ICCV2/PI489777)SNP_29720 | 882  | T | C | 13 | 3  | -- | WRKY         |
|            | Ca(ICCV2/PI489777)SNP_29721 | 1081 | A | T | 32 | 11 | -- | WRKY         |
|            | Ca(ICCV2/PI489777)SNP_29722 | 1231 | T | C | 24 | 8  | -- | WRKY         |
| CakTC35641 | Ca(ICCV2/PI489777)SNP_29723 | 1415 | T | C | 5  | 4  | -- | --           |
|            | Ca(ICCV2/PI489777)SNP_29724 | 1865 | T | A | 6  | 3  | -- | --           |
|            | Ca(ICCV2/PI489777)SNP_29725 | 1913 | A | G | 9  | 3  | -- | --           |
|            | Ca(ICCV2/PI489777)SNP_29726 | 3030 | A | G | 13 | 5  | -- | --           |
|            | Ca(ICCV2/PI489777)SNP_29727 | 3212 | T | A | 12 | 5  | -- | --           |
| CakTC25855 | Ca(ICCV2/PI489777)SNP_29728 | 504  | G | A | 28 | 15 | -- | --           |
|            | Ca(ICCV2/PI489777)SNP_29729 | 1047 | A | G | 20 | 8  | -- | --           |
|            | Ca(ICCV2/PI489777)SNP_29730 | 1464 | C | T | 15 | 11 | -- | --           |
|            | Ca(ICCV2/PI489777)SNP_29731 | 2131 | C | A | 7  | 14 | -- | --           |
|            | Ca(ICCV2/PI489777)SNP_29732 | 2611 | C | T | 12 | 15 | -- | --           |
|            | Ca(ICCV2/PI489777)SNP_29733 | 2691 | A | G | 11 | 15 | -- | --           |
|            | Ca(ICCV2/PI489777)SNP_29734 | 2716 | T | C | 12 | 15 | -- | --           |
|            | Ca(ICCV2/PI489777)SNP_29735 | 3113 | C | T | 26 | 15 | -- | --           |
|            | Ca(ICCV2/PI489777)SNP_29736 | 3429 | A | G | 21 | 4  | -- | --           |
|            | Ca(ICCV2/PI489777)SNP_29737 | 3876 | C | G | 15 | 4  | -- | --           |
|            | Ca(ICCV2/PI489777)SNP_29738 | 3951 | G | C | 10 | 4  | -- | --           |
| CakTC32914 | Ca(ICCV2/PI489777)SNP_29739 | 1199 | T | C | 4  | 6  | -- | WI/SNF-BAF60 |
|            | Ca(ICCV2/PI489777)SNP_29740 | 4048 | G | T | 12 | 5  | -- | WI/SNF-BAF60 |
|            | Ca(ICCV2/PI489777)SNP_29741 | 4069 | C | T | 12 | 7  | -- | WI/SNF-BAF60 |
|            | Ca(ICCV2/PI489777)SNP_29742 | 4070 | A | C | 13 | 6  | -- | WI/SNF-BAF60 |
|            | Ca(ICCV2/PI489777)SNP_29743 | 4081 | T | C | 15 | 8  | -- | WI/SNF-BAF60 |

|            |                            |      |   |   |     |    |           |              |
|------------|----------------------------|------|---|---|-----|----|-----------|--------------|
|            | Ca(ICC2/PI489777)SNP_29744 | 4082 | C | T | 16  | 8  | --        | WI/SNF-BAF60 |
| CakTC10162 | Ca(ICC2/PI489777)SNP_29745 | 1377 | T | A | 6   | 7  | --        | --           |
|            | Ca(ICC2/PI489777)SNP_29746 | 1769 | T | C | 4   | 3  | --        | --           |
|            | Ca(ICC2/PI489777)SNP_29747 | 2339 | C | T | 3   | 7  | --        | --           |
| CakTC24972 | Ca(ICC2/PI489777)SNP_29748 | 349  | A | G | 3   | 7  | --        | --           |
|            | Ca(ICC2/PI489777)SNP_29749 | 1039 | C | A | 8   | 8  | --        | --           |
|            | Ca(ICC2/PI489777)SNP_29750 | 1867 | A | C | 16  | 12 | --        | --           |
|            | Ca(ICC2/PI489777)SNP_29751 | 1874 | A | G | 17  | 13 | --        | --           |
|            | Ca(ICC2/PI489777)SNP_29752 | 2049 | A | T | 9   | 15 | --        | --           |
|            | Ca(ICC2/PI489777)SNP_29753 | 2173 | A | G | 7   | 12 | --        | --           |
| CakTC43085 | Ca(ICC2/PI489777)SNP_29754 | 528  | A | T | 20  | 5  | --        | --           |
|            | Ca(ICC2/PI489777)SNP_29755 | 636  | C | T | 23  | 6  | --        | --           |
|            | Ca(ICC2/PI489777)SNP_29756 | 729  | G | T | 13  | 6  | --        | --           |
|            | Ca(ICC2/PI489777)SNP_29757 | 769  | G | A | 15  | 6  | --        | --           |
|            | Ca(ICC2/PI489777)SNP_29758 | 774  | A | G | 15  | 6  | --        | --           |
| CakTC24788 | Ca(ICC2/PI489777)SNP_29759 | 902  | A | G | 133 | 40 | --        | --           |
|            | Ca(ICC2/PI489777)SNP_29760 | 1141 | A | G | 100 | 31 | --        | --           |
|            | Ca(ICC2/PI489777)SNP_29761 | 1503 | G | A | 37  | 42 | --        | --           |
|            | Ca(ICC2/PI489777)SNP_29762 | 1544 | G | A | 33  | 56 | --        | --           |
|            | Ca(ICC2/PI489777)SNP_29763 | 1655 | G | A | 29  | 41 | --        | --           |
|            | Ca(ICC2/PI489777)SNP_29764 | 2042 | C | G | 39  | 30 | --        | --           |
|            | Ca(ICC2/PI489777)SNP_29765 | 2702 | C | T | 42  | 65 | --        | --           |
| CakTC37331 | Ca(ICC2/PI489777)SNP_29766 | 129  | G | T | 12  | 3  | --        | TPR          |
|            | Ca(ICC2/PI489777)SNP_29767 | 151  | C | T | 12  | 3  | --        | TPR          |
|            | Ca(ICC2/PI489777)SNP_29768 | 275  | C | T | 15  | 3  | --        | TPR          |
|            | Ca(ICC2/PI489777)SNP_29769 | 310  | T | C | 13  | 3  | --        | TPR          |
|            | Ca(ICC2/PI489777)SNP_29770 | 667  | G | T | 8   | 10 | --        | TPR          |
|            | Ca(ICC2/PI489777)SNP_29771 | 687  | G | A | 10  | 11 | --        | TPR          |
|            | Ca(ICC2/PI489777)SNP_29772 | 754  | A | G | 9   | 13 | --        | TPR          |
|            | Ca(ICC2/PI489777)SNP_29773 | 949  | G | A | 7   | 10 | --        | TPR          |
|            | Ca(ICC2/PI489777)SNP_29774 | 1011 | A | C | 7   | 8  | --        | TPR          |
| CakTC33541 | Ca(ICC2/PI489777)SNP_29775 | 816  | G | C | 20  | 5  | --        | --           |
| CakTC25526 | Ca(ICC2/PI489777)SNP_29776 | 987  | G | A | 19  | 13 | --        | --           |
|            | Ca(ICC2/PI489777)SNP_29777 | 1136 | G | C | 23  | 8  | --        | --           |
|            | Ca(ICC2/PI489777)SNP_29778 | 1219 | G | A | 21  | 8  | --        | --           |
|            | Ca(ICC2/PI489777)SNP_29779 | 1406 | C | A | 22  | 9  | --        | --           |
| CakTC26200 | Ca(ICC2/PI489777)SNP_29780 | 21   | T | C | 4   | 4  | --        | --           |
|            | Ca(ICC2/PI489777)SNP_29781 | 468  | A | C | 27  | 7  | --        | --           |
|            | Ca(ICC2/PI489777)SNP_29782 | 474  | A | G | 22  | 8  | --        | --           |
|            | Ca(ICC2/PI489777)SNP_29783 | 481  | C | G | 18  | 7  | --        | --           |
|            | Ca(ICC2/PI489777)SNP_29784 | 492  | A | G | 16  | 5  | --        | --           |
|            | Ca(ICC2/PI489777)SNP_29785 | 501  | G | A | 16  | 3  | --        | --           |
|            | Ca(ICC2/PI489777)SNP_29786 | 538  | C | T | 12  | 3  | --        | --           |
|            | Ca(ICC2/PI489777)SNP_29787 | 552  | G | A | 12  | 3  | --        | --           |
|            | Ca(ICC2/PI489777)SNP_29788 | 561  | G | T | 12  | 3  | --        | --           |
| CakTC23182 | Ca(ICC2/PI489777)SNP_29789 | 129  | A | G | 413 | 3  | --        | --           |
|            | Ca(ICC2/PI489777)SNP_29790 | 155  | C | G | 507 | 3  | --        | --           |
|            | Ca(ICC2/PI489777)SNP_29791 | 382  | G | A | 371 | 3  | --        | --           |
| CakTC25560 | Ca(ICC2/PI489777)SNP_29792 | 738  | T | C | 6   | 13 | Young_pod | --           |
| CakTC01176 | Ca(ICC2/PI489777)SNP_29793 | 409  | C | A | 5   | 9  | --        | --           |
|            | Ca(ICC2/PI489777)SNP_29794 | 488  | C | T | 5   | 9  | --        | --           |
| CakTC38947 | Ca(ICC2/PI489777)SNP_29795 | 184  | T | A | 3   | 3  | --        | --           |
|            | Ca(ICC2/PI489777)SNP_29796 | 292  | G | A | 8   | 3  | --        | --           |
|            | Ca(ICC2/PI489777)SNP_29797 | 526  | G | A | 10  | 3  | --        | --           |
|            | Ca(ICC2/PI489777)SNP_29798 | 532  | C | T | 10  | 3  | --        | --           |
|            | Ca(ICC2/PI489777)SNP_29799 | 586  | A | C | 9   | 3  | --        | --           |
|            | Ca(ICC2/PI489777)SNP_29800 | 723  | G | A | 9   | 3  | --        | --           |
|            | Ca(ICC2/PI489777)SNP_29801 | 889  | A | G | 5   | 4  | --        | --           |
|            | Ca(ICC2/PI489777)SNP_29802 | 893  | G | A | 4   | 4  | --        | --           |
| CakTC39288 | Ca(ICC2/PI489777)SNP_29803 | 392  | A | C | 10  | 9  | --        | --           |
|            | Ca(ICC2/PI489777)SNP_29804 | 430  | G | C | 9   | 9  | --        | --           |
|            | Ca(ICC2/PI489777)SNP_29805 | 443  | C | A | 9   | 6  | --        | --           |
|            | Ca(ICC2/PI489777)SNP_29806 | 497  | T | A | 8   | 6  | --        | --           |
|            | Ca(ICC2/PI489777)SNP_29807 | 511  | A | G | 8   | 5  | --        | --           |
|            | Ca(ICC2/PI489777)SNP_29808 | 614  | A | G | 7   | 7  | --        | --           |
|            | Ca(ICC2/PI489777)SNP_29809 | 899  | G | A | 15  | 7  | --        | --           |
|            | Ca(ICC2/PI489777)SNP_29810 | 1367 | A | G | 6   | 6  | --        | --           |
|            | Ca(ICC2/PI489777)SNP_29811 | 1398 | G | T | 6   | 3  | --        | --           |
| CakTC43380 | Ca(ICC2/PI489777)SNP_29812 | 94   | T | C | 11  | 6  | --        | --           |
|            | Ca(ICC2/PI489777)SNP_29813 | 95   | G | A | 22  | 6  | --        | --           |
|            | Ca(ICC2/PI489777)SNP_29814 | 210  | C | T | 49  | 32 | --        | --           |
| CakTC39494 | Ca(ICC2/PI489777)SNP_29815 | 64   | C | G | 14  | 4  | --        | --           |
|            | Ca(ICC2/PI489777)SNP_29816 | 160  | C | A | 19  | 4  | --        | --           |
|            | Ca(ICC2/PI489777)SNP_29817 | 676  | C | T | 5   | 3  | --        | --           |

|            |                            |      |   |   |     |    |    |              |
|------------|----------------------------|------|---|---|-----|----|----|--------------|
|            | Ca(ICC2/PI489777)SNP_29818 | 721  | A | G | 5   | 4  | -- | --           |
|            | Ca(ICC2/PI489777)SNP_29819 | 730  | C | T | 5   | 4  | -- | --           |
|            | Ca(ICC2/PI489777)SNP_29820 | 922  | G | A | 7   | 4  | -- | --           |
| CakTC32018 | Ca(ICC2/PI489777)SNP_29821 | 580  | T | C | 3   | 9  | -- | --           |
|            | Ca(ICC2/PI489777)SNP_29822 | 933  | G | A | 5   | 22 | -- | --           |
|            | Ca(ICC2/PI489777)SNP_29823 | 1290 | A | G | 6   | 5  | -- | --           |
|            | Ca(ICC2/PI489777)SNP_29824 | 1875 | A | C | 7   | 10 | -- | --           |
|            | Ca(ICC2/PI489777)SNP_29825 | 1895 | G | A | 7   | 9  | -- | --           |
|            | Ca(ICC2/PI489777)SNP_29826 | 2009 | A | G | 5   | 7  | -- | --           |
| CakTC27664 | Ca(ICC2/PI489777)SNP_29827 | 834  | T | G | 3   | 6  | -- | --           |
| CakTC22574 | Ca(ICC2/PI489777)SNP_29828 | 616  | G | A | 5   | 3  | -- | --           |
| CakTC40849 | Ca(ICC2/PI489777)SNP_29829 | 163  | C | G | 16  | 4  | -- | --           |
|            | Ca(ICC2/PI489777)SNP_29830 | 1265 | C | G | 23  | 19 | -- | --           |
|            | Ca(ICC2/PI489777)SNP_29831 | 1478 | G | A | 20  | 7  | -- | --           |
| CakTC11485 | Ca(ICC2/PI489777)SNP_29832 | 556  | A | G | 3   | 10 | -- | --           |
|            | Ca(ICC2/PI489777)SNP_29833 | 1285 | T | C | 6   | 4  | -- | --           |
| CakTC39483 | Ca(ICC2/PI489777)SNP_29834 | 659  | T | A | 11  | 6  | -- | --           |
|            | Ca(ICC2/PI489777)SNP_29835 | 830  | A | G | 9   | 5  | -- | --           |
|            | Ca(ICC2/PI489777)SNP_29836 | 841  | C | T | 11  | 6  | -- | --           |
| CakTC37571 | Ca(ICC2/PI489777)SNP_29837 | 594  | G | T | 3   | 6  | -- | --           |
|            | Ca(ICC2/PI489777)SNP_29838 | 603  | C | T | 3   | 6  | -- | --           |
| CakTC43105 | Ca(ICC2/PI489777)SNP_29839 | 236  | G | A | 7   | 3  | -- | C2C2-Dof     |
|            | Ca(ICC2/PI489777)SNP_29840 | 297  | T | G | 10  | 3  | -- | C2C2-Dof     |
|            | Ca(ICC2/PI489777)SNP_29841 | 1031 | C | T | 17  | 11 | -- | C2C2-Dof     |
|            | Ca(ICC2/PI489777)SNP_29842 | 1094 | G | A | 21  | 11 | -- | C2C2-Dof     |
|            | Ca(ICC2/PI489777)SNP_29843 | 1149 | G | A | 20  | 9  | -- | C2C2-Dof     |
|            | Ca(ICC2/PI489777)SNP_29844 | 1194 | G | A | 18  | 9  | -- | C2C2-Dof     |
| CakTC41675 | Ca(ICC2/PI489777)SNP_29845 | 637  | G | A | 4   | 16 | -- | --           |
| CakTC37587 | Ca(ICC2/PI489777)SNP_29846 | 347  | A | G | 7   | 3  | -- | --           |
|            | Ca(ICC2/PI489777)SNP_29847 | 521  | G | A | 18  | 3  | -- | --           |
|            | Ca(ICC2/PI489777)SNP_29848 | 714  | C | T | 13  | 9  | -- | --           |
| CakTC05836 | Ca(ICC2/PI489777)SNP_29849 | 493  | C | T | 39  | 20 | -- | --           |
|            | Ca(ICC2/PI489777)SNP_29850 | 586  | T | C | 35  | 7  | -- | --           |
|            | Ca(ICC2/PI489777)SNP_29851 | 727  | C | T | 25  | 3  | -- | --           |
| CakTC39818 | Ca(ICC2/PI489777)SNP_29852 | 1004 | G | A | 13  | 4  | -- | --           |
| CakTC40600 | Ca(ICC2/PI489777)SNP_29853 | 457  | T | G | 9   | 6  | -- | --           |
|            | Ca(ICC2/PI489777)SNP_29854 | 1742 | C | T | 3   | 5  | -- | --           |
|            | Ca(ICC2/PI489777)SNP_29855 | 1790 | A | G | 3   | 6  | -- | --           |
|            | Ca(ICC2/PI489777)SNP_29856 | 2370 | C | T | 6   | 4  | -- | --           |
|            | Ca(ICC2/PI489777)SNP_29857 | 3937 | A | G | 11  | 3  | -- | --           |
| CakTC39384 | Ca(ICC2/PI489777)SNP_29858 | 217  | A | G | 5   | 5  | -- | --           |
|            | Ca(ICC2/PI489777)SNP_29859 | 358  | T | A | 6   | 17 | -- | --           |
|            | Ca(ICC2/PI489777)SNP_29860 | 454  | T | C | 7   | 15 | -- | --           |
|            | Ca(ICC2/PI489777)SNP_29861 | 550  | G | A | 6   | 14 | -- | --           |
| CakTC36591 | Ca(ICC2/PI489777)SNP_29862 | 111  | T | C | 8   | 3  | -- | --           |
|            | Ca(ICC2/PI489777)SNP_29863 | 2074 | G | A | 26  | 12 | -- | --           |
|            | Ca(ICC2/PI489777)SNP_29864 | 2077 | A | G | 27  | 12 | -- | --           |
|            | Ca(ICC2/PI489777)SNP_29865 | 2168 | T | A | 27  | 12 | -- | --           |
|            | Ca(ICC2/PI489777)SNP_29866 | 2192 | T | G | 23  | 11 | -- | --           |
|            | Ca(ICC2/PI489777)SNP_29867 | 2214 | G | A | 27  | 8  | -- | --           |
|            | Ca(ICC2/PI489777)SNP_29868 | 2369 | G | A | 19  | 9  | -- | --           |
| CakTC11563 | Ca(ICC2/PI489777)SNP_29869 | 195  | A | G | 6   | 4  | -- | --           |
|            | Ca(ICC2/PI489777)SNP_29870 | 585  | T | C | 10  | 7  | -- | --           |
| CakTC36298 | Ca(ICC2/PI489777)SNP_29871 | 937  | T | A | 5   | 3  | -- | --           |
| CakTC37347 | Ca(ICC2/PI489777)SNP_29872 | 246  | T | C | 121 | 71 | -- | --           |
|            | Ca(ICC2/PI489777)SNP_29873 | 441  | A | C | 96  | 91 | -- | --           |
|            | Ca(ICC2/PI489777)SNP_29874 | 471  | T | G | 75  | 91 | -- | --           |
|            | Ca(ICC2/PI489777)SNP_29875 | 588  | A | G | 90  | 60 | -- | --           |
| CakTC28356 | Ca(ICC2/PI489777)SNP_29876 | 153  | A | T | 4   | 11 | -- | --           |
| CakTC40629 | Ca(ICC2/PI489777)SNP_29877 | 64   | C | T | 41  | 20 | -- | WI/SNF-BAF60 |
|            | Ca(ICC2/PI489777)SNP_29878 | 485  | G | A | 71  | 53 | -- | WI/SNF-BAF60 |
|            | Ca(ICC2/PI489777)SNP_29879 | 526  | A | G | 58  | 48 | -- | WI/SNF-BAF60 |
|            | Ca(ICC2/PI489777)SNP_29880 | 527  | C | G | 60  | 48 | -- | WI/SNF-BAF60 |
|            | Ca(ICC2/PI489777)SNP_29881 | 589  | A | G | 42  | 42 | -- | WI/SNF-BAF60 |
| CakTC32072 | Ca(ICC2/PI489777)SNP_29882 | 575  | G | C | 11  | 3  | -- | --           |
|            | Ca(ICC2/PI489777)SNP_29883 | 579  | A | G | 11  | 4  | -- | --           |
| CakTC27996 | Ca(ICC2/PI489777)SNP_29884 | 936  | G | A | 20  | 10 | -- | --           |
|            | Ca(ICC2/PI489777)SNP_29885 | 1287 | G | A | 29  | 8  | -- | --           |
|            | Ca(ICC2/PI489777)SNP_29886 | 1578 | C | T | 14  | 13 | -- | --           |
| CakTC26882 | Ca(ICC2/PI489777)SNP_29887 | 203  | A | T | 13  | 8  | -- | --           |
| CakTC28667 | Ca(ICC2/PI489777)SNP_29888 | 297  | C | T | 11  | 7  | -- | --           |
|            | Ca(ICC2/PI489777)SNP_29889 | 429  | G | A | 13  | 10 | -- | --           |
|            | Ca(ICC2/PI489777)SNP_29890 | 504  | G | T | 12  | 11 | -- | --           |
|            | Ca(ICC2/PI489777)SNP_29891 | 608  | A | G | 13  | 12 | -- | --           |

|            |                             |      |   |   |    |    |    |     |
|------------|-----------------------------|------|---|---|----|----|----|-----|
|            | Ca(ICCV2/PI489777)SNP_29892 | 642  | T | C | 10 | 12 | -- | --  |
| CakTC42058 | Ca(ICCV2/PI489777)SNP_29893 | 150  | A | G | 18 | 15 | -- | --  |
|            | Ca(ICCV2/PI489777)SNP_29894 | 152  | T | A | 17 | 13 | -- | --  |
|            | Ca(ICCV2/PI489777)SNP_29895 | 168  | G | A | 21 | 16 | -- | --  |
|            | Ca(ICCV2/PI489777)SNP_29896 | 455  | T | A | 34 | 22 | -- | --  |
|            | Ca(ICCV2/PI489777)SNP_29897 | 659  | G | A | 35 | 14 | -- | --  |
|            | Ca(ICCV2/PI489777)SNP_29898 | 878  | C | A | 44 | 30 | -- | --  |
|            | Ca(ICCV2/PI489777)SNP_29899 | 1145 | A | G | 34 | 32 | -- | --  |
|            | Ca(ICCV2/PI489777)SNP_29900 | 1169 | A | G | 32 | 35 | -- | --  |
|            | Ca(ICCV2/PI489777)SNP_29901 | 1196 | G | A | 34 | 27 | -- | --  |
|            | Ca(ICCV2/PI489777)SNP_29902 | 1208 | A | G | 34 | 30 | -- | --  |
|            | Ca(ICCV2/PI489777)SNP_29903 | 1214 | T | G | 32 | 31 | -- | --  |
|            | Ca(ICCV2/PI489777)SNP_29904 | 1307 | A | C | 20 | 17 | -- | --  |
| CakTC31282 | Ca(ICCV2/PI489777)SNP_29905 | 265  | T | C | 6  | 3  | -- | --  |
|            | Ca(ICCV2/PI489777)SNP_29906 | 346  | A | G | 4  | 4  | -- | --  |
|            | Ca(ICCV2/PI489777)SNP_29907 | 362  | T | C | 5  | 4  | -- | --  |
| CakTC23737 | Ca(ICCV2/PI489777)SNP_29908 | 757  | G | C | 24 | 14 | -- | --  |
| CakTC29077 | Ca(ICCV2/PI489777)SNP_29909 | 140  | A | G | 16 | 4  | -- | --  |
|            | Ca(ICCV2/PI489777)SNP_29910 | 170  | G | A | 18 | 5  | -- | --  |
|            | Ca(ICCV2/PI489777)SNP_29911 | 177  | C | A | 20 | 6  | -- | --  |
|            | Ca(ICCV2/PI489777)SNP_29912 | 194  | G | C | 21 | 5  | -- | --  |
|            | Ca(ICCV2/PI489777)SNP_29913 | 302  | G | C | 23 | 7  | -- | --  |
|            | Ca(ICCV2/PI489777)SNP_29914 | 419  | T | C | 21 | 8  | -- | --  |
|            | Ca(ICCV2/PI489777)SNP_29915 | 607  | C | T | 8  | 3  | -- | --  |
| CakTC31589 | Ca(ICCV2/PI489777)SNP_29916 | 1089 | T | C | 8  | 10 | -- | --  |
|            | Ca(ICCV2/PI489777)SNP_29917 | 1096 | C | A | 8  | 9  | -- | --  |
|            | Ca(ICCV2/PI489777)SNP_29918 | 1677 | G | A | 7  | 8  | -- | --  |
|            | Ca(ICCV2/PI489777)SNP_29919 | 2265 | C | T | 8  | 6  | -- | --  |
|            | Ca(ICCV2/PI489777)SNP_29920 | 2489 | C | T | 10 | 9  | -- | --  |
|            | Ca(ICCV2/PI489777)SNP_29921 | 2547 | A | T | 10 | 9  | -- | --  |
| CakTC28123 | Ca(ICCV2/PI489777)SNP_29922 | 2000 | C | G | 4  | 3  | -- | --  |
|            | Ca(ICCV2/PI489777)SNP_29923 | 2031 | A | C | 3  | 3  | -- | --  |
|            | Ca(ICCV2/PI489777)SNP_29924 | 2699 | G | C | 3  | 3  | -- | --  |
|            | Ca(ICCV2/PI489777)SNP_29925 | 2836 | A | T | 3  | 4  | -- | --  |
|            | Ca(ICCV2/PI489777)SNP_29926 | 3061 | A | C | 5  | 7  | -- | --  |
|            | Ca(ICCV2/PI489777)SNP_29927 | 3316 | C | A | 6  | 8  | -- | --  |
|            | Ca(ICCV2/PI489777)SNP_29928 | 3655 | G | A | 6  | 4  | -- | --  |
| CakTC29978 | Ca(ICCV2/PI489777)SNP_29929 | 2779 | A | C | 3  | 4  | -- | --  |
| CakTC28460 | Ca(ICCV2/PI489777)SNP_29930 | 1106 | T | C | 36 | 24 | -- | --  |
| CakTC38137 | Ca(ICCV2/PI489777)SNP_29931 | 27   | T | C | 5  | 3  | -- | --  |
|            | Ca(ICCV2/PI489777)SNP_29932 | 29   | C | G | 5  | 3  | -- | --  |
|            | Ca(ICCV2/PI489777)SNP_29933 | 130  | C | A | 13 | 3  | -- | --  |
| CakTC07866 | Ca(ICCV2/PI489777)SNP_29934 | 869  | T | A | 3  | 3  | -- | --  |
|            | Ca(ICCV2/PI489777)SNP_29935 | 948  | A | C | 3  | 6  | -- | --  |
| CakTC41258 | Ca(ICCV2/PI489777)SNP_29936 | 311  | A | G | 7  | 5  | -- | --  |
| CakTC41795 | Ca(ICCV2/PI489777)SNP_29937 | 95   | T | A | 27 | 8  | -- | TPR |
|            | Ca(ICCV2/PI489777)SNP_29938 | 112  | A | T | 28 | 6  | -- | TPR |
|            | Ca(ICCV2/PI489777)SNP_29939 | 113  | G | A | 28 | 7  | -- | TPR |
|            | Ca(ICCV2/PI489777)SNP_29940 | 332  | G | A | 33 | 13 | -- | TPR |
|            | Ca(ICCV2/PI489777)SNP_29941 | 571  | C | G | 19 | 18 | -- | TPR |
|            | Ca(ICCV2/PI489777)SNP_29942 | 1525 | A | G | 29 | 11 | -- | TPR |
|            | Ca(ICCV2/PI489777)SNP_29943 | 2275 | T | A | 17 | 3  | -- | TPR |
| CakTC30822 | Ca(ICCV2/PI489777)SNP_29944 | 25   | G | A | 34 | 24 | -- | --  |
|            | Ca(ICCV2/PI489777)SNP_29945 | 82   | G | A | 63 | 66 | -- | --  |
|            | Ca(ICCV2/PI489777)SNP_29946 | 125  | G | A | 55 | 70 | -- | --  |
| CakTC13985 | Ca(ICCV2/PI489777)SNP_29947 | 1433 | A | G | 3  | 5  | -- | --  |
|            | Ca(ICCV2/PI489777)SNP_29948 | 1542 | T | C | 5  | 7  | -- | --  |
|            | Ca(ICCV2/PI489777)SNP_29949 | 1546 | G | A | 5  | 7  | -- | --  |
|            | Ca(ICCV2/PI489777)SNP_29950 | 1589 | T | C | 6  | 7  | -- | --  |
|            | Ca(ICCV2/PI489777)SNP_29951 | 1640 | C | T | 5  | 8  | -- | --  |
|            | Ca(ICCV2/PI489777)SNP_29952 | 1696 | T | C | 5  | 9  | -- | --  |
|            | Ca(ICCV2/PI489777)SNP_29953 | 1703 | C | T | 5  | 9  | -- | --  |
|            | Ca(ICCV2/PI489777)SNP_29954 | 1734 | C | T | 5  | 10 | -- | --  |
|            | Ca(ICCV2/PI489777)SNP_29955 | 1830 | G | A | 4  | 6  | -- | --  |
| CakTC38550 | Ca(ICCV2/PI489777)SNP_29956 | 473  | G | A | 8  | 9  | -- | --  |
|            | Ca(ICCV2/PI489777)SNP_29957 | 565  | G | A | 8  | 9  | -- | --  |
|            | Ca(ICCV2/PI489777)SNP_29958 | 569  | G | A | 8  | 10 | -- | --  |
|            | Ca(ICCV2/PI489777)SNP_29959 | 797  | T | G | 4  | 6  | -- | --  |
|            | Ca(ICCV2/PI489777)SNP_29960 | 998  | C | T | 4  | 6  | -- | --  |
|            | Ca(ICCV2/PI489777)SNP_29961 | 1016 | A | G | 3  | 6  | -- | --  |
|            | Ca(ICCV2/PI489777)SNP_29962 | 1043 | A | G | 4  | 6  | -- | --  |
|            | Ca(ICCV2/PI489777)SNP_29963 | 1100 | T | G | 5  | 4  | -- | --  |
|            | Ca(ICCV2/PI489777)SNP_29964 | 1211 | C | T | 4  | 7  | -- | --  |
| CakTC42707 | Ca(ICCV2/PI489777)SNP_29965 | 99   | A | T | 5  | 4  | -- | --  |

|            |                            |      |   |   |    |    |        |          |
|------------|----------------------------|------|---|---|----|----|--------|----------|
|            | Ca(ICC2/PI489777)SNP_29966 | 184  | G | A | 8  | 5  | --     | --       |
|            | Ca(ICC2/PI489777)SNP_29967 | 394  | C | A | 10 | 4  | --     | --       |
|            | Ca(ICC2/PI489777)SNP_29968 | 497  | A | G | 10 | 4  | --     | --       |
| CakTC41728 | Ca(ICC2/PI489777)SNP_29969 | 362  | T | C | 29 | 17 | --     | --       |
|            | Ca(ICC2/PI489777)SNP_29970 | 392  | A | T | 28 | 16 | --     | --       |
|            | Ca(ICC2/PI489777)SNP_29971 | 1018 | T | C | 21 | 7  | --     | --       |
|            | Ca(ICC2/PI489777)SNP_29972 | 1061 | G | C | 32 | 16 | --     | --       |
|            | Ca(ICC2/PI489777)SNP_29973 | 1124 | G | A | 32 | 20 | --     | --       |
|            | Ca(ICC2/PI489777)SNP_29974 | 2043 | A | G | 31 | 13 | --     | --       |
|            | Ca(ICC2/PI489777)SNP_29975 | 2056 | A | G | 33 | 13 | --     | --       |
| CakTC37316 | Ca(ICC2/PI489777)SNP_29976 | 576  | G | A | 22 | 10 | --     | --       |
| CakTC32284 | Ca(ICC2/PI489777)SNP_29977 | 751  | A | G | 4  | 6  | --     | --       |
| CakTC27528 | Ca(ICC2/PI489777)SNP_29978 | 614  | A | G | 7  | 7  | --     | TUB      |
|            | Ca(ICC2/PI489777)SNP_29979 | 680  | C | T | 10 | 9  | --     | TUB      |
|            | Ca(ICC2/PI489777)SNP_29980 | 1043 | C | T | 26 | 7  | --     | TUB      |
|            | Ca(ICC2/PI489777)SNP_29981 | 1163 | C | T | 23 | 5  | --     | TUB      |
|            | Ca(ICC2/PI489777)SNP_29982 | 1343 | C | T | 17 | 5  | --     | TUB      |
|            | Ca(ICC2/PI489777)SNP_29983 | 1355 | T | C | 20 | 5  | --     | TUB      |
|            | Ca(ICC2/PI489777)SNP_29984 | 1534 | C | A | 16 | 8  | --     | TUB      |
|            | Ca(ICC2/PI489777)SNP_29985 | 1559 | A | G | 18 | 9  | --     | TUB      |
| CakTC13085 | Ca(ICC2/PI489777)SNP_29986 | 409  | C | T | 8  | 3  | --     | --       |
| CakTC22633 | Ca(ICC2/PI489777)SNP_29987 | 648  | C | T | 7  | 8  | --     | SET      |
|            | Ca(ICC2/PI489777)SNP_29988 | 1111 | G | A | 9  | 3  | --     | SET      |
| CakTC33357 | Ca(ICC2/PI489777)SNP_29989 | 267  | T | C | 31 | 7  | --     | --       |
|            | Ca(ICC2/PI489777)SNP_29990 | 388  | A | G | 35 | 9  | --     | --       |
|            | Ca(ICC2/PI489777)SNP_29991 | 1846 | T | C | 26 | 13 | --     | --       |
|            | Ca(ICC2/PI489777)SNP_29992 | 1966 | T | A | 24 | 11 | --     | --       |
| CakTC29923 | Ca(ICC2/PI489777)SNP_29993 | 848  | C | T | 4  | 4  | --     | --       |
|            | Ca(ICC2/PI489777)SNP_29994 | 970  | G | A | 4  | 3  | --     | --       |
|            | Ca(ICC2/PI489777)SNP_29995 | 1509 | G | A | 4  | 6  | --     | --       |
|            | Ca(ICC2/PI489777)SNP_29996 | 1884 | G | A | 11 | 5  | --     | --       |
| CakTC40854 | Ca(ICC2/PI489777)SNP_29997 | 736  | A | G | 9  | 5  | --     | GNAT     |
| CakTC24045 | Ca(ICC2/PI489777)SNP_29998 | 142  | T | C | 13 | 3  | --     | --       |
|            | Ca(ICC2/PI489777)SNP_29999 | 696  | T | C | 54 | 22 | --     | --       |
| CakTC28665 | Ca(ICC2/PI489777)SNP_30000 | 233  | A | C | 48 | 27 | --     | --       |
|            | Ca(ICC2/PI489777)SNP_30001 | 561  | G | T | 53 | 26 | --     | --       |
|            | Ca(ICC2/PI489777)SNP_30002 | 2799 | C | T | 9  | 18 | --     | --       |
|            | Ca(ICC2/PI489777)SNP_30003 | 2835 | T | C | 5  | 11 | --     | --       |
| CakTC36215 | Ca(ICC2/PI489777)SNP_30004 | 98   | C | T | 11 | 6  | --     | --       |
|            | Ca(ICC2/PI489777)SNP_30005 | 156  | T | C | 11 | 10 | --     | --       |
|            | Ca(ICC2/PI489777)SNP_30006 | 200  | A | G | 11 | 10 | --     | --       |
|            | Ca(ICC2/PI489777)SNP_30007 | 289  | G | A | 11 | 10 | --     | --       |
|            | Ca(ICC2/PI489777)SNP_30008 | 298  | A | G | 11 | 11 | --     | --       |
| CakTC26864 | Ca(ICC2/PI489777)SNP_30009 | 661  | G | A | 9  | 16 | --     | --       |
|            | Ca(ICC2/PI489777)SNP_30010 | 712  | C | T | 5  | 16 | --     | --       |
|            | Ca(ICC2/PI489777)SNP_30011 | 832  | G | C | 13 | 4  | --     | --       |
| CakTC41438 | Ca(ICC2/PI489777)SNP_30012 | 645  | T | C | 19 | 14 | --     | --       |
|            | Ca(ICC2/PI489777)SNP_30013 | 1197 | C | T | 42 | 12 | --     | --       |
|            | Ca(ICC2/PI489777)SNP_30014 | 2110 | G | A | 29 | 15 | --     | --       |
| CakTC37424 | Ca(ICC2/PI489777)SNP_30015 | 512  | C | T | 9  | 6  | --     | --       |
|            | Ca(ICC2/PI489777)SNP_30016 | 573  | A | T | 8  | 6  | --     | --       |
| CakTC34374 | Ca(ICC2/PI489777)SNP_30017 | 116  | G | A | 8  | 3  | --     | zf-HD    |
| CakTC01425 | Ca(ICC2/PI489777)SNP_30018 | 478  | G | C | 7  | 5  | --     | C2C2-Dof |
| CakTC30380 | Ca(ICC2/PI489777)SNP_30019 | 1003 | G | T | 8  | 5  | --     | --       |
|            | Ca(ICC2/PI489777)SNP_30020 | 1199 | A | G | 8  | 6  | --     | --       |
| CakTC09943 | Ca(ICC2/PI489777)SNP_30021 | 706  | G | T | 3  | 4  | --     | --       |
| CakTC37266 | Ca(ICC2/PI489777)SNP_30022 | 868  | T | C | 10 | 4  | --     | bHLH     |
|            | Ca(ICC2/PI489777)SNP_30023 | 934  | C | T | 8  | 4  | --     | bHLH     |
|            | Ca(ICC2/PI489777)SNP_30024 | 990  | G | C | 5  | 3  | --     | bHLH     |
| CakTC26927 | Ca(ICC2/PI489777)SNP_30025 | 339  | G | A | 4  | 4  | --     | --       |
| CakTC29124 | Ca(ICC2/PI489777)SNP_30026 | 572  | T | C | 15 | 12 | --     | --       |
| CakTC39131 | Ca(ICC2/PI489777)SNP_30027 | 406  | A | C | 7  | 4  | --     | --       |
| CakTC11871 | Ca(ICC2/PI489777)SNP_30028 | 1697 | T | A | 25 | 4  | --     | --       |
|            | Ca(ICC2/PI489777)SNP_30029 | 2453 | G | C | 19 | 6  | --     | --       |
|            | Ca(ICC2/PI489777)SNP_30030 | 2465 | T | C | 20 | 3  | --     | --       |
|            | Ca(ICC2/PI489777)SNP_30031 | 2987 | A | G | 4  | 4  | --     | --       |
| CakTC42922 | Ca(ICC2/PI489777)SNP_30032 | 221  | G | A | 3  | 3  | Flower | bud      |
| CakTC27312 | Ca(ICC2/PI489777)SNP_30033 | 1030 | C | T | 9  | 3  | --     | --       |
|            | Ca(ICC2/PI489777)SNP_30034 | 1608 | A | G | 5  | 4  | --     | --       |
| CakTC42138 | Ca(ICC2/PI489777)SNP_30035 | 490  | A | C | 4  | 4  | --     | --       |
|            | Ca(ICC2/PI489777)SNP_30036 | 750  | T | C | 7  | 6  | --     | --       |
| CakTC37436 | Ca(ICC2/PI489777)SNP_30037 | 133  | T | C | 5  | 13 | --     | --       |
|            | Ca(ICC2/PI489777)SNP_30038 | 281  | C | T | 4  | 22 | --     | --       |
| CakTC37769 | Ca(ICC2/PI489777)SNP_30039 | 516  | G | A | 36 | 16 | --     | --       |

|            |                             |      |   |   |     |     |      |     |
|------------|-----------------------------|------|---|---|-----|-----|------|-----|
|            | Ca(ICCV2/PI489777)SNP_30040 | 729  | C | T | 38  | 20  | --   | --  |
| CakTC39650 | Ca(ICCV2/PI489777)SNP_30041 | 53   | G | T | 9   | 4   | --   | --  |
|            | Ca(ICCV2/PI489777)SNP_30042 | 68   | C | A | 9   | 5   | --   | --  |
|            | Ca(ICCV2/PI489777)SNP_30043 | 750  | C | T | 24  | 8   | --   | --  |
|            | Ca(ICCV2/PI489777)SNP_30044 | 1056 | C | G | 27  | 20  | --   | --  |
| CakTC30932 | Ca(ICCV2/PI489777)SNP_30045 | 285  | T | A | 5   | 4   | --   | --  |
|            | Ca(ICCV2/PI489777)SNP_30046 | 309  | C | T | 3   | 3   | --   | --  |
|            | Ca(ICCV2/PI489777)SNP_30047 | 1168 | T | G | 3   | 3   | --   | --  |
| CakTC25075 | Ca(ICCV2/PI489777)SNP_30048 | 125  | T | G | 77  | 63  | --   | --  |
|            | Ca(ICCV2/PI489777)SNP_30049 | 524  | C | T | 32  | 28  | --   | --  |
|            | Ca(ICCV2/PI489777)SNP_30050 | 712  | A | C | 65  | 39  | --   | --  |
|            | Ca(ICCV2/PI489777)SNP_30051 | 1034 | C | G | 26  | 5   | --   | --  |
|            | Ca(ICCV2/PI489777)SNP_30052 | 1093 | G | C | 18  | 7   | --   | --  |
| CakTC23493 | Ca(ICCV2/PI489777)SNP_30053 | 391  | A | T | 196 | 119 | --   | --  |
|            | Ca(ICCV2/PI489777)SNP_30054 | 1058 | C | T | 26  | 15  | --   | --  |
|            | Ca(ICCV2/PI489777)SNP_30055 | 1104 | C | A | 25  | 14  | --   | --  |
| CakTC24746 | Ca(ICCV2/PI489777)SNP_30056 | 708  | T | C | 52  | 19  | --   | --  |
|            | Ca(ICCV2/PI489777)SNP_30057 | 1104 | C | T | 51  | 20  | --   | --  |
| CakTC39215 | Ca(ICCV2/PI489777)SNP_30058 | 160  | A | T | 7   | 3   | --   | --  |
|            | Ca(ICCV2/PI489777)SNP_30059 | 1063 | A | T | 7   | 6   | --   | --  |
|            | Ca(ICCV2/PI489777)SNP_30060 | 1066 | G | A | 8   | 6   | --   | --  |
|            | Ca(ICCV2/PI489777)SNP_30061 | 1344 | T | G | 7   | 6   | --   | --  |
|            | Ca(ICCV2/PI489777)SNP_30062 | 1352 | A | G | 6   | 6   | --   | --  |
| CakTC25437 | Ca(ICCV2/PI489777)SNP_30063 | 286  | G | C | 49  | 11  | --   | --  |
| CakTC25927 | Ca(ICCV2/PI489777)SNP_30064 | 489  | C | T | 12  | 7   | --   | --  |
|            | Ca(ICCV2/PI489777)SNP_30065 | 547  | A | C | 18  | 8   | --   | --  |
|            | Ca(ICCV2/PI489777)SNP_30066 | 552  | A | G | 18  | 8   | --   | --  |
|            | Ca(ICCV2/PI489777)SNP_30067 | 747  | C | T | 15  | 8   | --   | --  |
|            | Ca(ICCV2/PI489777)SNP_30068 | 939  | C | T | 27  | 8   | --   | --  |
|            | Ca(ICCV2/PI489777)SNP_30069 | 1457 | T | C | 41  | 20  | --   | --  |
| CakTC08007 | Ca(ICCV2/PI489777)SNP_30070 | 97   | C | G | 4   | 3   | --   | --  |
|            | Ca(ICCV2/PI489777)SNP_30071 | 789  | C | A | 22  | 7   | --   | --  |
| CakTC27789 | Ca(ICCV2/PI489777)SNP_30072 | 412  | G | C | 26  | 4   | --   | --  |
|            | Ca(ICCV2/PI489777)SNP_30073 | 743  | A | C | 14  | 4   | --   | --  |
| CakTC39667 | Ca(ICCV2/PI489777)SNP_30074 | 992  | A | T | 10  | 7   | --   | --  |
| CakTC39249 | Ca(ICCV2/PI489777)SNP_30075 | 339  | C | T | 5   | 12  | --   | --  |
|            | Ca(ICCV2/PI489777)SNP_30076 | 822  | T | G | 5   | 4   | --   | --  |
|            | Ca(ICCV2/PI489777)SNP_30077 | 897  | A | C | 5   | 6   | --   | --  |
| CakTC41062 | Ca(ICCV2/PI489777)SNP_30078 | 45   | A | C | 7   | 3   | --   | --  |
|            | Ca(ICCV2/PI489777)SNP_30079 | 49   | C | T | 8   | 3   | --   | --  |
|            | Ca(ICCV2/PI489777)SNP_30080 | 88   | G | C | 9   | 12  | --   | --  |
|            | Ca(ICCV2/PI489777)SNP_30081 | 464  | T | C | 10  | 14  | --   | --  |
|            | Ca(ICCV2/PI489777)SNP_30082 | 1313 | C | T | 11  | 11  | --   | --  |
|            | Ca(ICCV2/PI489777)SNP_30083 | 1532 | A | C | 11  | 14  | --   | --  |
|            | Ca(ICCV2/PI489777)SNP_30084 | 2362 | T | C | 5   | 3   | --   | --  |
| CakTC27830 | Ca(ICCV2/PI489777)SNP_30085 | 64   | G | A | 12  | 17  | --   | --  |
| CakTC31459 | Ca(ICCV2/PI489777)SNP_30086 | 203  | C | T | 7   | 8   | Root | --  |
|            | Ca(ICCV2/PI489777)SNP_30087 | 264  | A | T | 7   | 8   | Root | --  |
|            | Ca(ICCV2/PI489777)SNP_30088 | 270  | G | A | 6   | 8   | Root | --  |
|            | Ca(ICCV2/PI489777)SNP_30089 | 278  | G | A | 6   | 8   | Root | --  |
|            | Ca(ICCV2/PI489777)SNP_30090 | 289  | A | G | 7   | 8   | Root | --  |
|            | Ca(ICCV2/PI489777)SNP_30091 | 297  | A | G | 7   | 7   | Root | --  |
|            | Ca(ICCV2/PI489777)SNP_30092 | 311  | G | A | 7   | 8   | Root | --  |
|            | Ca(ICCV2/PI489777)SNP_30093 | 713  | A | T | 7   | 11  | Root | --  |
|            | Ca(ICCV2/PI489777)SNP_30094 | 770  | A | C | 9   | 16  | Root | --  |
|            | Ca(ICCV2/PI489777)SNP_30095 | 799  | C | T | 10  | 19  | Root | --  |
|            | Ca(ICCV2/PI489777)SNP_30096 | 1061 | A | G | 13  | 18  | Root | --  |
|            | Ca(ICCV2/PI489777)SNP_30097 | 1136 | T | A | 8   | 16  | Root | --  |
| CakTC34514 | Ca(ICCV2/PI489777)SNP_30098 | 335  | G | A | 15  | 8   | --   | --  |
|            | Ca(ICCV2/PI489777)SNP_30099 | 580  | A | G | 16  | 10  | --   | --  |
| CakTC41684 | Ca(ICCV2/PI489777)SNP_30100 | 1711 | T | G | 11  | 13  | --   | --  |
| CakTC10520 | Ca(ICCV2/PI489777)SNP_30101 | 629  | A | G | 39  | 38  | --   | --  |
| CakTC03601 | Ca(ICCV2/PI489777)SNP_30102 | 180  | C | G | 10  | 6   | --   | MYB |
|            | Ca(ICCV2/PI489777)SNP_30103 | 250  | C | T | 17  | 7   | --   | MYB |
| CakTC24561 | Ca(ICCV2/PI489777)SNP_30104 | 433  | C | T | 3   | 3   | --   | --  |
| CakTC25882 | Ca(ICCV2/PI489777)SNP_30105 | 613  | T | C | 5   | 3   | --   | --  |
|            | Ca(ICCV2/PI489777)SNP_30106 | 1098 | A | G | 7   | 3   | --   | --  |
| CakTC07013 | Ca(ICCV2/PI489777)SNP_30107 | 27   | G | A | 3   | 5   | --   | --  |
|            | Ca(ICCV2/PI489777)SNP_30108 | 790  | T | C | 7   | 7   | --   | --  |
|            | Ca(ICCV2/PI489777)SNP_30109 | 791  | A | G | 7   | 6   | --   | --  |
| CakTC36451 | Ca(ICCV2/PI489777)SNP_30110 | 408  | T | C | 23  | 5   | --   | --  |
|            | Ca(ICCV2/PI489777)SNP_30111 | 583  | G | C | 27  | 7   | --   | --  |
|            | Ca(ICCV2/PI489777)SNP_30112 | 1041 | A | G | 34  | 7   | --   | --  |
|            | Ca(ICCV2/PI489777)SNP_30113 | 1545 | C | T | 15  | 13  | --   | --  |

|            |                            |      |   |   |     |     |       |    |
|------------|----------------------------|------|---|---|-----|-----|-------|----|
|            | Ca(ICC2/PI489777)SNP_30114 | 1626 | T | C | 21  | 13  | --    | -- |
|            | Ca(ICC2/PI489777)SNP_30115 | 1686 | T | A | 22  | 13  | --    | -- |
|            | Ca(ICC2/PI489777)SNP_30116 | 2398 | C | G | 49  | 11  | --    | -- |
| CakTC10312 | Ca(ICC2/PI489777)SNP_30117 | 690  | C | T | 10  | 3   | --    | -- |
|            | Ca(ICC2/PI489777)SNP_30118 | 1154 | G | A | 12  | 3   | --    | -- |
| CakTC38374 | Ca(ICC2/PI489777)SNP_30119 | 687  | C | T | 102 | 109 | --    | -- |
|            | Ca(ICC2/PI489777)SNP_30120 | 762  | T | C | 65  | 63  | --    | -- |
|            | Ca(ICC2/PI489777)SNP_30121 | 877  | T | C | 29  | 33  | --    | -- |
| CakTC31312 | Ca(ICC2/PI489777)SNP_30122 | 377  | T | C | 5   | 4   | --    | -- |
|            | Ca(ICC2/PI489777)SNP_30123 | 910  | G | A | 11  | 6   | --    | -- |
|            | Ca(ICC2/PI489777)SNP_30124 | 1417 | A | G | 13  | 4   | --    | -- |
|            | Ca(ICC2/PI489777)SNP_30125 | 2002 | T | C | 12  | 11  | --    | -- |
|            | Ca(ICC2/PI489777)SNP_30126 | 2044 | A | G | 12  | 10  | --    | -- |
|            | Ca(ICC2/PI489777)SNP_30127 | 2311 | C | A | 21  | 5   | --    | -- |
|            | Ca(ICC2/PI489777)SNP_30128 | 2580 | C | T | 8   | 4   | --    | -- |
|            | Ca(ICC2/PI489777)SNP_30129 | 2597 | G | C | 7   | 3   | --    | -- |
|            | Ca(ICC2/PI489777)SNP_30130 | 2614 | G | C | 8   | 4   | --    | -- |
| CakTC11476 | Ca(ICC2/PI489777)SNP_30131 | 97   | A | G | 7   | 3   | --    | -- |
|            | Ca(ICC2/PI489777)SNP_30132 | 668  | A | G | 61  | 33  | --    | -- |
|            | Ca(ICC2/PI489777)SNP_30133 | 1648 | C | T | 36  | 13  | --    | -- |
| CakTC32450 | Ca(ICC2/PI489777)SNP_30134 | 253  | C | T | 8   | 5   | --    | -- |
|            | Ca(ICC2/PI489777)SNP_30135 | 772  | T | C | 4   | 10  | --    | -- |
|            | Ca(ICC2/PI489777)SNP_30136 | 1702 | G | T | 14  | 7   | --    | -- |
| CakTC38278 | Ca(ICC2/PI489777)SNP_30137 | 652  | A | G | 7   | 3   | --    | -- |
| CakTC07777 | Ca(ICC2/PI489777)SNP_30138 | 278  | G | A | 4   | 4   | --    | -- |
| CakTC23071 | Ca(ICC2/PI489777)SNP_30139 | 70   | A | G | 33  | 4   | --    | HB |
|            | Ca(ICC2/PI489777)SNP_30140 | 1057 | C | T | 39  | 11  | --    | HB |
|            | Ca(ICC2/PI489777)SNP_30141 | 1060 | A | G | 45  | 12  | --    | HB |
|            | Ca(ICC2/PI489777)SNP_30142 | 1075 | C | T | 45  | 13  | --    | HB |
| CakTC41392 | Ca(ICC2/PI489777)SNP_30143 | 78   | A | G | 3   | 3   | Shoot | -- |
|            | Ca(ICC2/PI489777)SNP_30144 | 112  | C | T | 5   | 4   | Shoot | -- |
| CakTC29967 | Ca(ICC2/PI489777)SNP_30145 | 364  | C | T | 3   | 3   | --    | -- |
|            | Ca(ICC2/PI489777)SNP_30146 | 376  | C | T | 3   | 3   | --    | -- |
|            | Ca(ICC2/PI489777)SNP_30147 | 556  | T | C | 4   | 4   | --    | -- |
|            | Ca(ICC2/PI489777)SNP_30148 | 574  | C | T | 4   | 4   | --    | -- |
|            | Ca(ICC2/PI489777)SNP_30149 | 652  | C | T | 4   | 4   | --    | -- |
|            | Ca(ICC2/PI489777)SNP_30150 | 847  | T | C | 4   | 7   | --    | -- |
|            | Ca(ICC2/PI489777)SNP_30151 | 853  | T | A | 4   | 7   | --    | -- |
|            | Ca(ICC2/PI489777)SNP_30152 | 895  | T | C | 4   | 7   | --    | -- |
|            | Ca(ICC2/PI489777)SNP_30153 | 901  | T | A | 4   | 7   | --    | -- |
|            | Ca(ICC2/PI489777)SNP_30154 | 1501 | C | T | 10  | 3   | --    | -- |
|            | Ca(ICC2/PI489777)SNP_30155 | 1508 | T | C | 9   | 3   | --    | -- |
|            | Ca(ICC2/PI489777)SNP_30156 | 1528 | C | T | 12  | 3   | --    | -- |
|            | Ca(ICC2/PI489777)SNP_30157 | 1536 | T | G | 11  | 3   | --    | -- |
| CakTC07160 | Ca(ICC2/PI489777)SNP_30158 | 572  | T | C | 3   | 30  | --    | -- |
|            | Ca(ICC2/PI489777)SNP_30159 | 879  | T | A | 7   | 25  | --    | -- |
| CakTC41840 | Ca(ICC2/PI489777)SNP_30160 | 383  | A | T | 65  | 59  | --    | -- |
|            | Ca(ICC2/PI489777)SNP_30161 | 386  | C | G | 67  | 60  | --    | -- |
|            | Ca(ICC2/PI489777)SNP_30162 | 428  | A | G | 63  | 59  | --    | -- |
|            | Ca(ICC2/PI489777)SNP_30163 | 675  | A | C | 79  | 50  | --    | -- |
|            | Ca(ICC2/PI489777)SNP_30164 | 704  | T | A | 82  | 50  | --    | -- |
|            | Ca(ICC2/PI489777)SNP_30165 | 728  | T | C | 74  | 57  | --    | -- |
|            | Ca(ICC2/PI489777)SNP_30166 | 850  | T | C | 77  | 55  | --    | -- |
|            | Ca(ICC2/PI489777)SNP_30167 | 919  | T | C | 63  | 67  | --    | -- |
|            | Ca(ICC2/PI489777)SNP_30168 | 1080 | C | A | 89  | 81  | --    | -- |
| CakTC27363 | Ca(ICC2/PI489777)SNP_30169 | 1248 | C | T | 22  | 14  | --    | -- |
|            | Ca(ICC2/PI489777)SNP_30170 | 3901 | G | A | 23  | 11  | --    | -- |
|            | Ca(ICC2/PI489777)SNP_30171 | 4244 | T | C | 37  | 30  | --    | -- |
| CakTC23651 | Ca(ICC2/PI489777)SNP_30172 | 473  | C | A | 22  | 13  | --    | -- |
|            | Ca(ICC2/PI489777)SNP_30173 | 558  | C | A | 4   | 3   | --    | -- |
|            | Ca(ICC2/PI489777)SNP_30174 | 635  | G | A | 3   | 3   | --    | -- |
|            | Ca(ICC2/PI489777)SNP_30175 | 1094 | A | G | 8   | 3   | --    | -- |
|            | Ca(ICC2/PI489777)SNP_30176 | 1949 | A | G | 10  | 3   | --    | -- |
|            | Ca(ICC2/PI489777)SNP_30177 | 1989 | T | G | 7   | 3   | --    | -- |
| CakTC39416 | Ca(ICC2/PI489777)SNP_30178 | 207  | G | C | 11  | 10  | --    | -- |
|            | Ca(ICC2/PI489777)SNP_30179 | 480  | G | C | 9   | 6   | --    | -- |
|            | Ca(ICC2/PI489777)SNP_30180 | 779  | G | T | 9   | 3   | --    | -- |
|            | Ca(ICC2/PI489777)SNP_30181 | 871  | C | T | 6   | 7   | --    | -- |
| CakTC34877 | Ca(ICC2/PI489777)SNP_30182 | 276  | G | A | 3   | 3   | --    | -- |
| CakTC40299 | Ca(ICC2/PI489777)SNP_30183 | 9    | G | T | 3   | 8   | --    | -- |
|            | Ca(ICC2/PI489777)SNP_30184 | 221  | G | A | 4   | 31  | --    | -- |
|            | Ca(ICC2/PI489777)SNP_30185 | 355  | C | T | 5   | 28  | --    | -- |
|            | Ca(ICC2/PI489777)SNP_30186 | 610  | G | A | 5   | 24  | --    | -- |
|            | Ca(ICC2/PI489777)SNP_30187 | 676  | A | G | 4   | 32  | --    | -- |



|            |                            |      |   |   |     |    |      |      |
|------------|----------------------------|------|---|---|-----|----|------|------|
| CakTC37661 | Ca(ICC2/PI489777)SNP_30188 | 81   | G | T | 9   | 8  | --   | --   |
|            | Ca(ICC2/PI489777)SNP_30189 | 159  | T | A | 10  | 8  | --   | --   |
| CakTC38467 | Ca(ICC2/PI489777)SNP_30190 | 101  | C | A | 11  | 22 | --   | --   |
|            | Ca(ICC2/PI489777)SNP_30191 | 1031 | C | T | 3   | 3  | --   | --   |
| CakTC11689 | Ca(ICC2/PI489777)SNP_30192 | 185  | G | A | 9   | 13 | --   | --   |
|            | Ca(ICC2/PI489777)SNP_30193 | 257  | G | A | 12  | 18 | --   | --   |
|            | Ca(ICC2/PI489777)SNP_30194 | 302  | A | T | 16  | 17 | --   | --   |
|            | Ca(ICC2/PI489777)SNP_30195 | 320  | A | G | 17  | 21 | --   | --   |
|            | Ca(ICC2/PI489777)SNP_30196 | 474  | T | C | 26  | 19 | --   | --   |
| CakTC37984 | Ca(ICC2/PI489777)SNP_30197 | 924  | A | G | 22  | 13 | --   | WRKY |
| CakTC31990 | Ca(ICC2/PI489777)SNP_30198 | 260  | G | C | 6   | 4  | --   | --   |
|            | Ca(ICC2/PI489777)SNP_30199 | 1494 | C | G | 3   | 3  | --   | --   |
| CakTC09765 | Ca(ICC2/PI489777)SNP_30200 | 1140 | C | T | 4   | 13 | --   | --   |
|            | Ca(ICC2/PI489777)SNP_30201 | 1257 | A | G | 4   | 10 | --   | --   |
| CakTC11401 | Ca(ICC2/PI489777)SNP_30202 | 136  | G | T | 9   | 5  | --   | --   |
|            | Ca(ICC2/PI489777)SNP_30203 | 149  | A | C | 7   | 4  | --   | --   |
|            | Ca(ICC2/PI489777)SNP_30204 | 175  | A | G | 8   | 8  | --   | --   |
|            | Ca(ICC2/PI489777)SNP_30205 | 437  | G | A | 14  | 16 | --   | --   |
|            | Ca(ICC2/PI489777)SNP_30206 | 441  | G | A | 12  | 17 | --   | --   |
|            | Ca(ICC2/PI489777)SNP_30207 | 489  | G | A | 12  | 19 | --   | --   |
|            | Ca(ICC2/PI489777)SNP_30208 | 567  | T | A | 9   | 16 | --   | --   |
|            | Ca(ICC2/PI489777)SNP_30209 | 690  | G | T | 6   | 12 | --   | --   |
|            | Ca(ICC2/PI489777)SNP_30210 | 702  | G | A | 7   | 16 | --   | --   |
|            | Ca(ICC2/PI489777)SNP_30211 | 831  | A | G | 12  | 10 | --   | --   |
|            | Ca(ICC2/PI489777)SNP_30212 | 1152 | T | A | 10  | 8  | --   | --   |
| CakTC25867 | Ca(ICC2/PI489777)SNP_30213 | 455  | G | A | 3   | 3  | --   | --   |
| CakTC04190 | Ca(ICC2/PI489777)SNP_30214 | 1318 | G | A | 10  | 5  | Root | --   |
|            | Ca(ICC2/PI489777)SNP_30215 | 1368 | G | T | 12  | 8  | Root | --   |
|            | Ca(ICC2/PI489777)SNP_30216 | 1588 | T | C | 8   | 10 | Root | --   |
|            | Ca(ICC2/PI489777)SNP_30217 | 1620 | C | G | 9   | 7  | Root | --   |
|            | Ca(ICC2/PI489777)SNP_30218 | 1736 | G | A | 8   | 6  | Root | --   |
|            | Ca(ICC2/PI489777)SNP_30219 | 1834 | A | G | 4   | 3  | Root | --   |
|            | Ca(ICC2/PI489777)SNP_30220 | 1860 | C | T | 5   | 3  | Root | --   |
| CakTC27142 | Ca(ICC2/PI489777)SNP_30221 | 1143 | C | T | 173 | 78 | --   | --   |
|            | Ca(ICC2/PI489777)SNP_30222 | 1209 | C | T | 174 | 78 | --   | --   |
| CakTC27723 | Ca(ICC2/PI489777)SNP_30223 | 5    | C | T | 5   | 6  | --   | --   |
|            | Ca(ICC2/PI489777)SNP_30224 | 678  | C | T | 6   | 18 | --   | --   |
|            | Ca(ICC2/PI489777)SNP_30225 | 781  | A | G | 7   | 25 | --   | --   |
|            | Ca(ICC2/PI489777)SNP_30226 | 819  | T | A | 11  | 23 | --   | --   |
|            | Ca(ICC2/PI489777)SNP_30227 | 1065 | A | C | 19  | 23 | --   | --   |
|            | Ca(ICC2/PI489777)SNP_30228 | 1292 | T | G | 9   | 16 | --   | --   |
| CakTC30971 | Ca(ICC2/PI489777)SNP_30229 | 390  | G | C | 8   | 6  | Root | MYB  |
|            | Ca(ICC2/PI489777)SNP_30230 | 561  | T | C | 5   | 3  | Root | MYB  |
|            | Ca(ICC2/PI489777)SNP_30231 | 657  | G | T | 5   | 5  | Root | MYB  |
|            | Ca(ICC2/PI489777)SNP_30232 | 741  | T | C | 5   | 5  | Root | MYB  |
|            | Ca(ICC2/PI489777)SNP_30233 | 765  | T | C | 5   | 5  | Root | MYB  |
| CakTC06597 | Ca(ICC2/PI489777)SNP_30234 | 585  | G | T | 19  | 19 | --   | --   |
|            | Ca(ICC2/PI489777)SNP_30235 | 741  | A | G | 29  | 12 | --   | --   |
|            | Ca(ICC2/PI489777)SNP_30236 | 971  | C | T | 38  | 20 | --   | --   |
|            | Ca(ICC2/PI489777)SNP_30237 | 1319 | T | C | 16  | 4  | --   | --   |
| CakTC32750 | Ca(ICC2/PI489777)SNP_30238 | 60   | A | G | 9   | 4  | --   | --   |
|            | Ca(ICC2/PI489777)SNP_30239 | 112  | A | C | 12  | 6  | --   | --   |
|            | Ca(ICC2/PI489777)SNP_30240 | 497  | T | C | 18  | 11 | --   | --   |
|            | Ca(ICC2/PI489777)SNP_30241 | 1858 | A | T | 11  | 16 | --   | --   |
| CakTC40193 | Ca(ICC2/PI489777)SNP_30242 | 388  | T | C | 4   | 4  | --   | --   |
| CakTC34570 | Ca(ICC2/PI489777)SNP_30243 | 442  | G | C | 34  | 7  | --   | --   |
|            | Ca(ICC2/PI489777)SNP_30244 | 515  | T | C | 45  | 8  | --   | --   |
|            | Ca(ICC2/PI489777)SNP_30245 | 587  | T | C | 46  | 8  | --   | --   |
|            | Ca(ICC2/PI489777)SNP_30246 | 1013 | T | C | 24  | 5  | --   | --   |
|            | Ca(ICC2/PI489777)SNP_30247 | 1553 | G | A | 27  | 3  | --   | --   |
| CakTC30009 | Ca(ICC2/PI489777)SNP_30248 | 2871 | A | G | 6   | 4  | --   | --   |
| CakTC27780 | Ca(ICC2/PI489777)SNP_30249 | 453  | G | A | 8   | 5  | --   | --   |
|            | Ca(ICC2/PI489777)SNP_30250 | 523  | C | G | 13  | 4  | --   | --   |
|            | Ca(ICC2/PI489777)SNP_30251 | 1130 | G | T | 11  | 10 | --   | --   |
|            | Ca(ICC2/PI489777)SNP_30252 | 1266 | G | C | 18  | 12 | --   | --   |
|            | Ca(ICC2/PI489777)SNP_30253 | 1559 | G | A | 21  | 8  | --   | --   |
| CakTC43099 | Ca(ICC2/PI489777)SNP_30254 | 230  | T | G | 3   | 4  | Root | --   |
|            | Ca(ICC2/PI489777)SNP_30255 | 1951 | G | A | 7   | 3  | Root | --   |
| CakTC38014 | Ca(ICC2/PI489777)SNP_30256 | 399  | T | C | 12  | 4  | --   | --   |
|            | Ca(ICC2/PI489777)SNP_30257 | 816  | C | T | 10  | 5  | --   | --   |
| CakTC38007 | Ca(ICC2/PI489777)SNP_30258 | 571  | C | A | 12  | 6  | --   | --   |
|            | Ca(ICC2/PI489777)SNP_30259 | 581  | G | A | 13  | 6  | --   | --   |
| CakTC40280 | Ca(ICC2/PI489777)SNP_30260 | 566  | C | T | 64  | 61 | --   | --   |
|            | Ca(ICC2/PI489777)SNP_30261 | 774  | G | T | 59  | 48 | --   | --   |

|            |                            |      |   |   |     |    |        |     |
|------------|----------------------------|------|---|---|-----|----|--------|-----|
| CakTC28718 | Ca(ICC2/PI489777)SNP_30262 | 460  | G | A | 52  | 23 | --     | --  |
|            | Ca(ICC2/PI489777)SNP_30263 | 604  | G | A | 52  | 22 | --     | --  |
|            | Ca(ICC2/PI489777)SNP_30264 | 1548 | C | T | 55  | 23 | --     | --  |
| CakTC07674 | Ca(ICC2/PI489777)SNP_30265 | 460  | G | A | 5   | 3  | --     | --  |
| CakTC42303 | Ca(ICC2/PI489777)SNP_30266 | 362  | A | G | 27  | 8  | --     | --  |
|            | Ca(ICC2/PI489777)SNP_30267 | 524  | T | C | 14  | 6  | --     | --  |
|            | Ca(ICC2/PI489777)SNP_30268 | 623  | C | T | 14  | 4  | --     | --  |
| CakTC40382 | Ca(ICC2/PI489777)SNP_30269 | 239  | C | T | 13  | 9  | --     | --  |
|            | Ca(ICC2/PI489777)SNP_30270 | 299  | C | T | 13  | 8  | --     | --  |
|            | Ca(ICC2/PI489777)SNP_30271 | 335  | C | T | 14  | 9  | --     | --  |
|            | Ca(ICC2/PI489777)SNP_30272 | 458  | T | C | 20  | 8  | --     | --  |
|            | Ca(ICC2/PI489777)SNP_30273 | 680  | C | T | 19  | 7  | --     | --  |
| CakTC26307 | Ca(ICC2/PI489777)SNP_30274 | 1729 | T | C | 90  | 73 | --     | --  |
|            | Ca(ICC2/PI489777)SNP_30275 | 1741 | T | C | 100 | 70 | --     | --  |
| CakTC25518 | Ca(ICC2/PI489777)SNP_30276 | 315  | G | C | 5   | 4  | --     | --  |
|            | Ca(ICC2/PI489777)SNP_30277 | 394  | T | G | 4   | 5  | --     | --  |
| CakTC33645 | Ca(ICC2/PI489777)SNP_30278 | 211  | G | A | 12  | 7  | --     | --  |
|            | Ca(ICC2/PI489777)SNP_30279 | 322  | G | A | 16  | 8  | --     | --  |
|            | Ca(ICC2/PI489777)SNP_30280 | 575  | G | A | 13  | 6  | --     | --  |
|            | Ca(ICC2/PI489777)SNP_30281 | 640  | A | T | 16  | 4  | --     | --  |
|            | Ca(ICC2/PI489777)SNP_30282 | 1041 | T | C | 18  | 11 | --     | --  |
|            | Ca(ICC2/PI489777)SNP_30283 | 1242 | T | C | 20  | 6  | --     | --  |
| CakTC32216 | Ca(ICC2/PI489777)SNP_30284 | 502  | A | G | 3   | 4  | --     | --  |
|            | Ca(ICC2/PI489777)SNP_30285 | 507  | T | C | 3   | 4  | --     | --  |
| CakTC35044 | Ca(ICC2/PI489777)SNP_30286 | 2034 | C | G | 4   | 4  | --     | --  |
|            | Ca(ICC2/PI489777)SNP_30287 | 2284 | A | G | 5   | 6  | --     | --  |
|            | Ca(ICC2/PI489777)SNP_30288 | 2290 | G | T | 5   | 6  | --     | --  |
|            | Ca(ICC2/PI489777)SNP_30289 | 2601 | C | G | 3   | 3  | --     | --  |
| CakTC36488 | Ca(ICC2/PI489777)SNP_30290 | 300  | G | C | 3   | 12 | --     | --  |
| CakTC26690 | Ca(ICC2/PI489777)SNP_30291 | 316  | T | C | 43  | 34 | --     | --  |
|            | Ca(ICC2/PI489777)SNP_30292 | 1712 | A | G | 35  | 31 | --     | --  |
|            | Ca(ICC2/PI489777)SNP_30293 | 1831 | A | G | 12  | 21 | --     | --  |
| CakTC42359 | Ca(ICC2/PI489777)SNP_30294 | 326  | T | C | 31  | 5  | --     | --  |
|            | Ca(ICC2/PI489777)SNP_30295 | 754  | C | T | 20  | 13 | --     | --  |
| CakTC38444 | Ca(ICC2/PI489777)SNP_30296 | 1281 | C | T | 17  | 6  | Flower | bud |
|            | Ca(ICC2/PI489777)SNP_30297 | 1287 | G | C | 17  | 6  | Flower | bud |
| CakTC30017 | Ca(ICC2/PI489777)SNP_30298 | 1213 | C | T | 11  | 3  | --     | --  |
|            | Ca(ICC2/PI489777)SNP_30299 | 2960 | T | G | 55  | 18 | --     | --  |
|            | Ca(ICC2/PI489777)SNP_30300 | 3514 | T | G | 58  | 11 | --     | --  |
|            | Ca(ICC2/PI489777)SNP_30301 | 3530 | A | G | 43  | 9  | --     | --  |
| CakTC25624 | Ca(ICC2/PI489777)SNP_30302 | 880  | C | G | 9   | 3  | Root   | --  |
|            | Ca(ICC2/PI489777)SNP_30303 | 929  | C | T | 12  | 4  | Root   | --  |
|            | Ca(ICC2/PI489777)SNP_30304 | 2886 | C | A | 12  | 4  | Root   | --  |
| CakTC32786 | Ca(ICC2/PI489777)SNP_30305 | 119  | T | C | 3   | 4  | --     | --  |
|            | Ca(ICC2/PI489777)SNP_30306 | 121  | A | G | 3   | 4  | --     | --  |
|            | Ca(ICC2/PI489777)SNP_30307 | 160  | A | G | 6   | 4  | --     | --  |
|            | Ca(ICC2/PI489777)SNP_30308 | 172  | T | C | 7   | 3  | --     | --  |
|            | Ca(ICC2/PI489777)SNP_30309 | 174  | G | A | 7   | 4  | --     | --  |
|            | Ca(ICC2/PI489777)SNP_30310 | 187  | C | T | 7   | 3  | --     | --  |
|            | Ca(ICC2/PI489777)SNP_30311 | 189  | A | G | 7   | 3  | --     | --  |
|            | Ca(ICC2/PI489777)SNP_30312 | 219  | G | C | 7   | 4  | --     | --  |
|            | Ca(ICC2/PI489777)SNP_30313 | 242  | G | A | 8   | 4  | --     | --  |
|            | Ca(ICC2/PI489777)SNP_30314 | 293  | G | A | 8   | 4  | --     | --  |
|            | Ca(ICC2/PI489777)SNP_30315 | 298  | A | G | 8   | 4  | --     | --  |
|            | Ca(ICC2/PI489777)SNP_30316 | 320  | C | T | 7   | 3  | --     | --  |
|            | Ca(ICC2/PI489777)SNP_30317 | 361  | T | C | 3   | 3  | --     | --  |
|            | Ca(ICC2/PI489777)SNP_30318 | 367  | G | T | 6   | 3  | --     | --  |
| CakTC43202 | Ca(ICC2/PI489777)SNP_30319 | 74   | T | G | 14  | 4  | --     | --  |
|            | Ca(ICC2/PI489777)SNP_30320 | 79   | T | C | 14  | 4  | --     | --  |
|            | Ca(ICC2/PI489777)SNP_30321 | 111  | T | A | 16  | 6  | --     | --  |
|            | Ca(ICC2/PI489777)SNP_30322 | 134  | T | A | 16  | 6  | --     | --  |
|            | Ca(ICC2/PI489777)SNP_30323 | 142  | C | T | 16  | 6  | --     | --  |
|            | Ca(ICC2/PI489777)SNP_30324 | 148  | C | T | 16  | 6  | --     | --  |
|            | Ca(ICC2/PI489777)SNP_30325 | 631  | C | A | 8   | 11 | --     | --  |
|            | Ca(ICC2/PI489777)SNP_30326 | 659  | T | C | 8   | 9  | --     | --  |
|            | Ca(ICC2/PI489777)SNP_30327 | 673  | C | T | 8   | 8  | --     | --  |
|            | Ca(ICC2/PI489777)SNP_30328 | 718  | G | A | 7   | 6  | --     | --  |
| CakTC35140 | Ca(ICC2/PI489777)SNP_30329 | 401  | T | C | 3   | 6  | --     | --  |
|            | Ca(ICC2/PI489777)SNP_30330 | 575  | A | G | 5   | 13 | --     | --  |
|            | Ca(ICC2/PI489777)SNP_30331 | 2058 | A | T | 9   | 9  | --     | --  |
|            | Ca(ICC2/PI489777)SNP_30332 | 3051 | C | T | 13  | 6  | --     | --  |
|            | Ca(ICC2/PI489777)SNP_30333 | 3204 | G | A | 8   | 5  | --     | --  |
| CakTC09928 | Ca(ICC2/PI489777)SNP_30334 | 2040 | C | T | 3   | 4  | --     | --  |
| CakTC34339 | Ca(ICC2/PI489777)SNP_30335 | 355  | C | T | 3   | 4  | --     | --  |

|            |                            |      |   |   |    |    |           |     |
|------------|----------------------------|------|---|---|----|----|-----------|-----|
| CakTC31949 | Ca(ICC2/PI489777)SNP_30336 | 1101 | G | A | 8  | 4  | --        | --  |
| CakTC32806 | Ca(ICC2/PI489777)SNP_30337 | 585  | C | T | 10 | 5  | --        | --  |
|            | Ca(ICC2/PI489777)SNP_30338 | 866  | C | G | 11 | 10 | --        | --  |
| CakTC25237 | Ca(ICC2/PI489777)SNP_30339 | 213  | T | G | 3  | 4  | --        | --  |
|            | Ca(ICC2/PI489777)SNP_30340 | 459  | G | C | 12 | 6  | --        | --  |
|            | Ca(ICC2/PI489777)SNP_30341 | 1422 | G | T | 4  | 7  | --        | --  |
| CakTC39242 | Ca(ICC2/PI489777)SNP_30342 | 3390 | C | T | 10 | 4  | --        | --  |
| CakTC43179 | Ca(ICC2/PI489777)SNP_30343 | 756  | G | T | 7  | 5  | --        | --  |
| CakTC32514 | Ca(ICC2/PI489777)SNP_30344 | 304  | C | G | 8  | 6  | --        | --  |
|            | Ca(ICC2/PI489777)SNP_30345 | 305  | C | T | 8  | 8  | --        | --  |
|            | Ca(ICC2/PI489777)SNP_30346 | 355  | C | G | 8  | 8  | --        | --  |
| CakTC07708 | Ca(ICC2/PI489777)SNP_30347 | 522  | A | G | 7  | 13 | --        | --  |
|            | Ca(ICC2/PI489777)SNP_30348 | 525  | G | A | 10 | 12 | --        | --  |
|            | Ca(ICC2/PI489777)SNP_30349 | 546  | C | A | 9  | 11 | --        | --  |
| CakTC42105 | Ca(ICC2/PI489777)SNP_30350 | 70   | G | A | 9  | 8  | --        | --  |
|            | Ca(ICC2/PI489777)SNP_30351 | 177  | G | T | 24 | 15 | --        | --  |
|            | Ca(ICC2/PI489777)SNP_30352 | 264  | G | A | 27 | 15 | --        | --  |
| CakTC29883 | Ca(ICC2/PI489777)SNP_30353 | 1681 | T | C | 10 | 4  | --        | --  |
|            | Ca(ICC2/PI489777)SNP_30354 | 1701 | A | C | 18 | 4  | --        | --  |
|            | Ca(ICC2/PI489777)SNP_30355 | 2185 | A | G | 5  | 4  | --        | --  |
|            | Ca(ICC2/PI489777)SNP_30356 | 2191 | A | G | 5  | 4  | --        | --  |
|            | Ca(ICC2/PI489777)SNP_30357 | 2654 | A | G | 10 | 5  | --        | --  |
| CakTC39488 | Ca(ICC2/PI489777)SNP_30358 | 853  | T | C | 18 | 13 | --        | --  |
|            | Ca(ICC2/PI489777)SNP_30359 | 1047 | G | A | 18 | 9  | --        | --  |
| CakTC20247 | Ca(ICC2/PI489777)SNP_30360 | 694  | G | C | 4  | 3  | Flower    | bud |
| CakTC24340 | Ca(ICC2/PI489777)SNP_30361 | 963  | T | G | 23 | 12 | --        | --  |
|            | Ca(ICC2/PI489777)SNP_30362 | 1408 | C | T | 27 | 15 | --        | --  |
|            | Ca(ICC2/PI489777)SNP_30363 | 1863 | A | G | 25 | 11 | --        | --  |
|            | Ca(ICC2/PI489777)SNP_30364 | 1869 | T | G | 24 | 10 | --        | --  |
| CakTC26563 | Ca(ICC2/PI489777)SNP_30365 | 300  | C | T | 11 | 7  | --        | --  |
|            | Ca(ICC2/PI489777)SNP_30366 | 533  | G | C | 11 | 11 | --        | --  |
| CakTC26160 | Ca(ICC2/PI489777)SNP_30367 | 1584 | T | C | 5  | 3  | --        | TPR |
|            | Ca(ICC2/PI489777)SNP_30368 | 1622 | C | T | 5  | 3  | --        | TPR |
| CakTC37868 | Ca(ICC2/PI489777)SNP_30369 | 59   | C | T | 17 | 10 | --        | --  |
|            | Ca(ICC2/PI489777)SNP_30370 | 575  | C | T | 42 | 24 | --        | --  |
|            | Ca(ICC2/PI489777)SNP_30371 | 587  | A | T | 46 | 25 | --        | --  |
|            | Ca(ICC2/PI489777)SNP_30372 | 920  | C | T | 51 | 21 | --        | --  |
|            | Ca(ICC2/PI489777)SNP_30373 | 1097 | C | T | 59 | 29 | --        | --  |
|            | Ca(ICC2/PI489777)SNP_30374 | 1136 | T | C | 62 | 26 | --        | --  |
|            | Ca(ICC2/PI489777)SNP_30375 | 1220 | T | C | 56 | 22 | --        | --  |
|            | Ca(ICC2/PI489777)SNP_30376 | 1422 | T | C | 39 | 12 | --        | --  |
|            | Ca(ICC2/PI489777)SNP_30377 | 1535 | C | T | 13 | 6  | --        | --  |
|            | Ca(ICC2/PI489777)SNP_30378 | 1549 | G | C | 9  | 6  | --        | --  |
| CakTC42448 | Ca(ICC2/PI489777)SNP_30379 | 205  | T | A | 4  | 6  | --        | --  |
| CakTC26834 | Ca(ICC2/PI489777)SNP_30380 | 253  | T | G | 9  | 7  | --        | --  |
|            | Ca(ICC2/PI489777)SNP_30381 | 3139 | T | C | 10 | 13 | --        | --  |
| CakTC27127 | Ca(ICC2/PI489777)SNP_30382 | 996  | T | C | 4  | 4  | Flower    | bud |
|            | Ca(ICC2/PI489777)SNP_30383 | 1037 | T | C | 4  | 5  | Flower    | bud |
|            | Ca(ICC2/PI489777)SNP_30384 | 1309 | A | G | 4  | 9  | Flower    | bud |
| CakTC11027 | Ca(ICC2/PI489777)SNP_30385 | 637  | G | A | 20 | 12 | --        | --  |
|            | Ca(ICC2/PI489777)SNP_30386 | 698  | T | G | 14 | 8  | --        | --  |
|            | Ca(ICC2/PI489777)SNP_30387 | 699  | C | G | 13 | 8  | --        | --  |
|            | Ca(ICC2/PI489777)SNP_30388 | 733  | T | A | 11 | 7  | --        | --  |
|            | Ca(ICC2/PI489777)SNP_30389 | 745  | G | C | 10 | 7  | --        | --  |
| CakTC31496 | Ca(ICC2/PI489777)SNP_30390 | 255  | G | A | 3  | 6  | --        | --  |
|            | Ca(ICC2/PI489777)SNP_30391 | 256  | A | G | 3  | 6  | --        | --  |
|            | Ca(ICC2/PI489777)SNP_30392 | 374  | G | A | 7  | 8  | --        | --  |
|            | Ca(ICC2/PI489777)SNP_30393 | 677  | T | C | 9  | 8  | --        | --  |
| CakTC05762 | Ca(ICC2/PI489777)SNP_30394 | 70   | G | A | 17 | 18 | --        | --  |
| CakTC23040 | Ca(ICC2/PI489777)SNP_30395 | 129  | T | C | 18 | 3  | --        | --  |
|            | Ca(ICC2/PI489777)SNP_30396 | 241  | A | G | 15 | 5  | --        | --  |
|            | Ca(ICC2/PI489777)SNP_30397 | 289  | T | A | 15 | 4  | --        | --  |
|            | Ca(ICC2/PI489777)SNP_30398 | 303  | C | G | 16 | 5  | --        | --  |
|            | Ca(ICC2/PI489777)SNP_30399 | 511  | T | A | 22 | 4  | --        | --  |
|            | Ca(ICC2/PI489777)SNP_30400 | 714  | G | A | 32 | 10 | --        | --  |
|            | Ca(ICC2/PI489777)SNP_30401 | 715  | A | G | 33 | 12 | --        | --  |
|            | Ca(ICC2/PI489777)SNP_30402 | 1256 | C | T | 58 | 9  | --        | --  |
| CakTC36196 | Ca(ICC2/PI489777)SNP_30403 | 649  | T | C | 3  | 4  | --        | --  |
| CakTC10788 | Ca(ICC2/PI489777)SNP_30404 | 197  | A | G | 3  | 9  | Young_pod | --  |
| CakTC13636 | Ca(ICC2/PI489777)SNP_30405 | 478  | A | G | 6  | 4  | --        | --  |
| CakTC39965 | Ca(ICC2/PI489777)SNP_30406 | 527  | G | A | 15 | 21 | --        | --  |
|            | Ca(ICC2/PI489777)SNP_30407 | 884  | T | C | 18 | 27 | --        | --  |
| CakTC35123 | Ca(ICC2/PI489777)SNP_30408 | 669  | A | G | 5  | 4  | --        | --  |
|            | Ca(ICC2/PI489777)SNP_30409 | 760  | G | A | 5  | 4  | --        | --  |

|            |                            |      |   |   |    |    |       |       |
|------------|----------------------------|------|---|---|----|----|-------|-------|
|            | Ca(ICC2/PI489777)SNP_30410 | 885  | G | A | 7  | 3  | --    | --    |
|            | Ca(ICC2/PI489777)SNP_30411 | 1278 | G | A | 7  | 3  | --    | --    |
|            | Ca(ICC2/PI489777)SNP_30412 | 1401 | A | G | 7  | 5  | --    | --    |
|            | Ca(ICC2/PI489777)SNP_30413 | 1581 | G | A | 5  | 7  | --    | --    |
|            | Ca(ICC2/PI489777)SNP_30414 | 1659 | C | T | 6  | 7  | --    | --    |
|            | Ca(ICC2/PI489777)SNP_30415 | 2293 | G | A | 15 | 3  | --    | --    |
|            | Ca(ICC2/PI489777)SNP_30416 | 2463 | A | T | 18 | 5  | --    | --    |
|            | Ca(ICC2/PI489777)SNP_30417 | 3372 | A | G | 7  | 3  | --    | --    |
| CakTC24401 | Ca(ICC2/PI489777)SNP_30418 | 135  | T | C | 5  | 3  | --    | --    |
|            | Ca(ICC2/PI489777)SNP_30419 | 393  | A | G | 5  | 7  | --    | --    |
|            | Ca(ICC2/PI489777)SNP_30420 | 504  | G | A | 6  | 4  | --    | --    |
| CakTC23391 | Ca(ICC2/PI489777)SNP_30421 | 88   | A | G | 11 | 9  | --    | --    |
|            | Ca(ICC2/PI489777)SNP_30422 | 143  | T | C | 17 | 17 | --    | --    |
| CakTC41339 | Ca(ICC2/PI489777)SNP_30423 | 610  | A | G | 6  | 9  | Shoot | --    |
| CakTC34847 | Ca(ICC2/PI489777)SNP_30424 | 1970 | A | C | 5  | 4  | --    | HB    |
|            | Ca(ICC2/PI489777)SNP_30425 | 1999 | G | A | 5  | 4  | --    | HB    |
|            | Ca(ICC2/PI489777)SNP_30426 | 2008 | A | G | 5  | 4  | --    | HB    |
|            | Ca(ICC2/PI489777)SNP_30427 | 2011 | G | A | 4  | 4  | --    | HB    |
|            | Ca(ICC2/PI489777)SNP_30428 | 2641 | T | C | 4  | 3  | --    | HB    |
|            | Ca(ICC2/PI489777)SNP_30429 | 3664 | C | T | 9  | 8  | --    | HB    |
| CakTC00831 | Ca(ICC2/PI489777)SNP_30430 | 1375 | A | G | 4  | 3  | --    | --    |
| CakTC26416 | Ca(ICC2/PI489777)SNP_30431 | 593  | C | T | 15 | 15 | --    | --    |
|            | Ca(ICC2/PI489777)SNP_30432 | 1184 | C | T | 16 | 12 | --    | --    |
| CakTC42859 | Ca(ICC2/PI489777)SNP_30433 | 1020 | C | T | 8  | 3  | --    | --    |
|            | Ca(ICC2/PI489777)SNP_30434 | 1074 | G | T | 6  | 3  | --    | --    |
|            | Ca(ICC2/PI489777)SNP_30435 | 1752 | C | T | 6  | 5  | --    | --    |
| CakTC27172 | Ca(ICC2/PI489777)SNP_30436 | 737  | G | A | 61 | 54 | --    | --    |
|            | Ca(ICC2/PI489777)SNP_30437 | 803  | A | G | 34 | 30 | --    | --    |
|            | Ca(ICC2/PI489777)SNP_30438 | 881  | T | C | 3  | 6  | --    | --    |
| CakTC25087 | Ca(ICC2/PI489777)SNP_30439 | 78   | A | T | 4  | 7  | --    | --    |
|            | Ca(ICC2/PI489777)SNP_30440 | 92   | C | T | 4  | 9  | --    | --    |
|            | Ca(ICC2/PI489777)SNP_30441 | 273  | T | C | 26 | 31 | --    | --    |
|            | Ca(ICC2/PI489777)SNP_30442 | 1091 | C | G | 13 | 10 | --    | --    |
| CakTC37798 | Ca(ICC2/PI489777)SNP_30443 | 610  | A | C | 3  | 8  | --    | C3H   |
|            | Ca(ICC2/PI489777)SNP_30444 | 615  | C | A | 3  | 8  | --    | C3H   |
| CakTC36428 | Ca(ICC2/PI489777)SNP_30445 | 438  | A | G | 4  | 5  | --    | --    |
|            | Ca(ICC2/PI489777)SNP_30446 | 474  | G | A | 3  | 5  | --    | --    |
|            | Ca(ICC2/PI489777)SNP_30447 | 813  | G | A | 3  | 4  | --    | --    |
|            | Ca(ICC2/PI489777)SNP_30448 | 815  | C | T | 3  | 4  | --    | --    |
|            | Ca(ICC2/PI489777)SNP_30449 | 946  | C | T | 3  | 3  | --    | --    |
| CakTC41057 | Ca(ICC2/PI489777)SNP_30450 | 165  | A | G | 12 | 3  | --    | --    |
|            | Ca(ICC2/PI489777)SNP_30451 | 370  | A | G | 39 | 11 | --    | --    |
|            | Ca(ICC2/PI489777)SNP_30452 | 429  | A | G | 45 | 19 | --    | --    |
|            | Ca(ICC2/PI489777)SNP_30453 | 1425 | A | G | 57 | 20 | --    | --    |
|            | Ca(ICC2/PI489777)SNP_30454 | 1473 | G | A | 59 | 25 | --    | --    |
| CakTC38972 | Ca(ICC2/PI489777)SNP_30455 | 348  | A | G | 57 | 36 | --    | --    |
|            | Ca(ICC2/PI489777)SNP_30456 | 390  | A | G | 54 | 41 | --    | --    |
|            | Ca(ICC2/PI489777)SNP_30457 | 393  | G | A | 58 | 40 | --    | --    |
|            | Ca(ICC2/PI489777)SNP_30458 | 522  | T | C | 62 | 52 | --    | --    |
|            | Ca(ICC2/PI489777)SNP_30459 | 564  | C | T | 59 | 50 | --    | --    |
|            | Ca(ICC2/PI489777)SNP_30460 | 1074 | C | T | 25 | 17 | --    | --    |
| CakTC31624 | Ca(ICC2/PI489777)SNP_30461 | 470  | A | C | 8  | 8  | --    | --    |
|            | Ca(ICC2/PI489777)SNP_30462 | 1559 | C | G | 3  | 4  | --    | --    |
| CakTC30764 | Ca(ICC2/PI489777)SNP_30463 | 412  | C | T | 5  | 7  | --    | --    |
|            | Ca(ICC2/PI489777)SNP_30464 | 418  | A | T | 5  | 8  | --    | --    |
|            | Ca(ICC2/PI489777)SNP_30465 | 468  | G | C | 3  | 8  | --    | --    |
|            | Ca(ICC2/PI489777)SNP_30466 | 564  | C | T | 3  | 9  | --    | --    |
| CakTC39748 | Ca(ICC2/PI489777)SNP_30467 | 1113 | T | C | 39 | 21 | --    | zf-HD |
|            | Ca(ICC2/PI489777)SNP_30468 | 1221 | G | A | 36 | 15 | --    | zf-HD |
|            | Ca(ICC2/PI489777)SNP_30469 | 1318 | C | A | 14 | 4  | --    | zf-HD |
|            | Ca(ICC2/PI489777)SNP_30470 | 1784 | A | C | 16 | 10 | --    | zf-HD |
|            | Ca(ICC2/PI489777)SNP_30471 | 1825 | A | T | 19 | 9  | --    | zf-HD |
|            | Ca(ICC2/PI489777)SNP_30472 | 1990 | C | G | 18 | 8  | --    | zf-HD |
| CakTC41723 | Ca(ICC2/PI489777)SNP_30473 | 393  | C | T | 26 | 31 | --    | --    |
| CakTC39377 | Ca(ICC2/PI489777)SNP_30474 | 824  | T | A | 4  | 9  | --    | --    |
| CakTC41431 | Ca(ICC2/PI489777)SNP_30475 | 516  | C | T | 5  | 3  | --    | --    |
| CakTC39782 | Ca(ICC2/PI489777)SNP_30476 | 147  | A | C | 15 | 3  | --    | --    |
|            | Ca(ICC2/PI489777)SNP_30477 | 264  | A | G | 24 | 7  | --    | --    |
|            | Ca(ICC2/PI489777)SNP_30478 | 347  | C | T | 25 | 9  | --    | --    |
|            | Ca(ICC2/PI489777)SNP_30479 | 464  | G | A | 25 | 14 | --    | --    |
| CakTC41334 | Ca(ICC2/PI489777)SNP_30480 | 175  | G | T | 23 | 15 | --    | --    |
| CakTC43180 | Ca(ICC2/PI489777)SNP_30481 | 643  | C | T | 13 | 6  | --    | --    |
| CakTC40317 | Ca(ICC2/PI489777)SNP_30482 | 311  | C | T | 25 | 12 | --    | --    |
|            | Ca(ICC2/PI489777)SNP_30483 | 332  | G | C | 24 | 12 | --    | --    |

|            |                            |      |   |   |    |    |        |     |
|------------|----------------------------|------|---|---|----|----|--------|-----|
|            | Ca(ICC2/PI489777)SNP_30484 | 1121 | A | G | 25 | 11 | --     | --  |
|            | Ca(ICC2/PI489777)SNP_30485 | 1145 | T | A | 28 | 13 | --     | --  |
| CakTC38006 | Ca(ICC2/PI489777)SNP_30486 | 953  | C | G | 13 | 16 | --     | --  |
|            | Ca(ICC2/PI489777)SNP_30487 | 1059 | C | T | 4  | 5  | --     | --  |
| CakTC24487 | Ca(ICC2/PI489777)SNP_30488 | 647  | C | T | 3  | 8  | --     | --  |
| CakTC24853 | Ca(ICC2/PI489777)SNP_30489 | 1110 | C | G | 8  | 5  | --     | --  |
|            | Ca(ICC2/PI489777)SNP_30490 | 1147 | T | C | 7  | 4  | --     | --  |
| CakTC33108 | Ca(ICC2/PI489777)SNP_30491 | 720  | C | T | 38 | 5  | --     | --  |
|            | Ca(ICC2/PI489777)SNP_30492 | 825  | G | A | 33 | 5  | --     | --  |
|            | Ca(ICC2/PI489777)SNP_30493 | 861  | C | T | 32 | 8  | --     | --  |
|            | Ca(ICC2/PI489777)SNP_30494 | 1203 | G | A | 30 | 16 | --     | --  |
|            | Ca(ICC2/PI489777)SNP_30495 | 1435 | A | T | 27 | 10 | --     | --  |
|            | Ca(ICC2/PI489777)SNP_30496 | 1614 | G | A | 29 | 18 | --     | --  |
|            | Ca(ICC2/PI489777)SNP_30497 | 1837 | A | T | 25 | 9  | --     | --  |
| CakTC37148 | Ca(ICC2/PI489777)SNP_30498 | 1093 | C | T | 19 | 4  | --     | --  |
|            | Ca(ICC2/PI489777)SNP_30499 | 1576 | C | T | 20 | 6  | --     | --  |
| CakTC23022 | Ca(ICC2/PI489777)SNP_30500 | 3124 | G | A | 5  | 3  | --     | --  |
|            | Ca(ICC2/PI489777)SNP_30501 | 3539 | G | A | 6  | 11 | --     | --  |
|            | Ca(ICC2/PI489777)SNP_30502 | 3569 | T | G | 5  | 13 | --     | --  |
|            | Ca(ICC2/PI489777)SNP_30503 | 3585 | A | G | 4  | 13 | --     | --  |
| CakTC24485 | Ca(ICC2/PI489777)SNP_30504 | 427  | T | G | 16 | 5  | --     | --  |
|            | Ca(ICC2/PI489777)SNP_30505 | 1036 | T | C | 14 | 17 | --     | --  |
| CakTC32827 | Ca(ICC2/PI489777)SNP_30506 | 146  | C | T | 11 | 8  | --     | --  |
|            | Ca(ICC2/PI489777)SNP_30507 | 580  | T | C | 8  | 6  | --     | --  |
|            | Ca(ICC2/PI489777)SNP_30508 | 919  | C | T | 16 | 6  | --     | --  |
|            | Ca(ICC2/PI489777)SNP_30509 | 1844 | A | T | 16 | 11 | --     | --  |
|            | Ca(ICC2/PI489777)SNP_30510 | 1940 | A | G | 18 | 14 | --     | --  |
|            | Ca(ICC2/PI489777)SNP_30511 | 2587 | G | T | 11 | 12 | --     | --  |
|            | Ca(ICC2/PI489777)SNP_30512 | 2588 | T | G | 11 | 11 | --     | --  |
|            | Ca(ICC2/PI489777)SNP_30513 | 2641 | G | A | 11 | 8  | --     | --  |
|            | Ca(ICC2/PI489777)SNP_30514 | 2652 | T | C | 9  | 7  | --     | --  |
| CakTC42411 | Ca(ICC2/PI489777)SNP_30515 | 74   | G | A | 9  | 9  | --     | --  |
|            | Ca(ICC2/PI489777)SNP_30516 | 104  | G | T | 10 | 12 | --     | --  |
|            | Ca(ICC2/PI489777)SNP_30517 | 821  | G | T | 19 | 4  | --     | --  |
| CakTC18613 | Ca(ICC2/PI489777)SNP_30518 | 297  | T | C | 26 | 14 | --     | --  |
| CakTC41494 | Ca(ICC2/PI489777)SNP_30519 | 837  | T | C | 4  | 6  | Flower | bud |
| CakTC33403 | Ca(ICC2/PI489777)SNP_30520 | 697  | A | G | 4  | 3  | --     | --  |
| CakTC39001 | Ca(ICC2/PI489777)SNP_30521 | 175  | A | C | 14 | 6  | --     | --  |
|            | Ca(ICC2/PI489777)SNP_30522 | 233  | C | T | 17 | 5  | --     | --  |
| CakTC26435 | Ca(ICC2/PI489777)SNP_30523 | 79   | A | G | 9  | 5  | --     | --  |
|            | Ca(ICC2/PI489777)SNP_30524 | 908  | A | G | 35 | 14 | --     | --  |
|            | Ca(ICC2/PI489777)SNP_30525 | 983  | T | C | 23 | 17 | --     | --  |
|            | Ca(ICC2/PI489777)SNP_30526 | 1055 | T | C | 17 | 17 | --     | --  |
|            | Ca(ICC2/PI489777)SNP_30527 | 1155 | T | C | 6  | 11 | --     | --  |
| CakTC39496 | Ca(ICC2/PI489777)SNP_30528 | 1086 | A | C | 7  | 8  | --     | --  |
| CakTC39914 | Ca(ICC2/PI489777)SNP_30529 | 159  | C | T | 7  | 4  | --     | --  |
|            | Ca(ICC2/PI489777)SNP_30530 | 604  | A | G | 17 | 12 | --     | --  |
|            | Ca(ICC2/PI489777)SNP_30531 | 625  | A | G | 28 | 15 | --     | --  |
|            | Ca(ICC2/PI489777)SNP_30532 | 1239 | T | C | 18 | 6  | --     | --  |
|            | Ca(ICC2/PI489777)SNP_30533 | 1256 | C | A | 15 | 6  | --     | --  |
|            | Ca(ICC2/PI489777)SNP_30534 | 1266 | C | T | 14 | 4  | --     | --  |
| CakTC22980 | Ca(ICC2/PI489777)SNP_30535 | 47   | A | T | 4  | 3  | --     | --  |
|            | Ca(ICC2/PI489777)SNP_30536 | 138  | T | C | 7  | 4  | --     | --  |
|            | Ca(ICC2/PI489777)SNP_30537 | 153  | G | A | 7  | 4  | --     | --  |
|            | Ca(ICC2/PI489777)SNP_30538 | 288  | A | T | 5  | 3  | --     | --  |
| CakTC25805 | Ca(ICC2/PI489777)SNP_30539 | 481  | C | G | 16 | 6  | --     | --  |
| CakTC34533 | Ca(ICC2/PI489777)SNP_30540 | 989  | A | G | 10 | 12 | --     | SET |
|            | Ca(ICC2/PI489777)SNP_30541 | 1257 | A | G | 17 | 14 | --     | SET |
|            | Ca(ICC2/PI489777)SNP_30542 | 1491 | G | C | 13 | 5  | --     | SET |
|            | Ca(ICC2/PI489777)SNP_30543 | 1506 | T | A | 10 | 5  | --     | SET |
|            | Ca(ICC2/PI489777)SNP_30544 | 1527 | A | G | 8  | 5  | --     | SET |
|            | Ca(ICC2/PI489777)SNP_30545 | 1670 | A | G | 8  | 4  | --     | SET |
|            | Ca(ICC2/PI489777)SNP_30546 | 2299 | A | G | 11 | 6  | --     | SET |
|            | Ca(ICC2/PI489777)SNP_30547 | 2367 | G | A | 13 | 7  | --     | SET |
|            | Ca(ICC2/PI489777)SNP_30548 | 2485 | A | G | 6  | 4  | --     | SET |
|            | Ca(ICC2/PI489777)SNP_30549 | 2656 | C | T | 12 | 5  | --     | SET |
|            | Ca(ICC2/PI489777)SNP_30550 | 3115 | C | T | 15 | 13 | --     | SET |
|            | Ca(ICC2/PI489777)SNP_30551 | 3397 | C | G | 14 | 6  | --     | SET |
|            | Ca(ICC2/PI489777)SNP_30552 | 3715 | A | G | 10 | 4  | --     | SET |
|            | Ca(ICC2/PI489777)SNP_30553 | 3842 | G | A | 9  | 5  | --     | SET |
|            | Ca(ICC2/PI489777)SNP_30554 | 4411 | A | G | 7  | 10 | --     | SET |
|            | Ca(ICC2/PI489777)SNP_30555 | 4644 | G | A | 12 | 3  | --     | SET |
|            | Ca(ICC2/PI489777)SNP_30556 | 4768 | G | A | 14 | 3  | --     | SET |
|            | Ca(ICC2/PI489777)SNP_30557 | 4923 | G | A | 11 | 6  | --     | SET |

|            |                             |      |   |   |    |    |    |             |
|------------|-----------------------------|------|---|---|----|----|----|-------------|
|            | Ca(ICCV2/PI489777)SNP_30558 | 5233 | C | T | 6  | 8  | -- | SET         |
|            | Ca(ICCV2/PI489777)SNP_30559 | 6448 | C | T | 17 | 10 | -- | SET         |
|            | Ca(ICCV2/PI489777)SNP_30560 | 6763 | G | C | 18 | 13 | -- | SET         |
|            | Ca(ICCV2/PI489777)SNP_30561 | 7405 | T | C | 21 | 7  | -- | SET         |
|            | Ca(ICCV2/PI489777)SNP_30562 | 7439 | C | T | 20 | 6  | -- | SET         |
|            | Ca(ICCV2/PI489777)SNP_30563 | 7527 | G | C | 18 | 6  | -- | SET         |
|            | Ca(ICCV2/PI489777)SNP_30564 | 7608 | T | C | 17 | 6  | -- | SET         |
| CakTC32111 | Ca(ICCV2/PI489777)SNP_30565 | 236  | C | G | 41 | 38 | -- | --          |
|            | Ca(ICCV2/PI489777)SNP_30566 | 245  | C | T | 42 | 41 | -- | --          |
| CakTC40554 | Ca(ICCV2/PI489777)SNP_30567 | 383  | T | G | 10 | 3  | -- | --          |
|            | Ca(ICCV2/PI489777)SNP_30568 | 1332 | G | C | 9  | 3  | -- | --          |
|            | Ca(ICCV2/PI489777)SNP_30569 | 1983 | G | A | 7  | 10 | -- | --          |
|            | Ca(ICCV2/PI489777)SNP_30570 | 2038 | A | G | 10 | 9  | -- | --          |
| CakTC23711 | Ca(ICCV2/PI489777)SNP_30571 | 464  | A | T | 82 | 7  | -- | --          |
| CakTC24560 | Ca(ICCV2/PI489777)SNP_30572 | 1349 | T | G | 24 | 29 | -- | Bromodomain |
|            | Ca(ICCV2/PI489777)SNP_30573 | 1711 | C | T | 34 | 12 | -- | Bromodomain |
| CakTC42142 | Ca(ICCV2/PI489777)SNP_30574 | 108  | G | A | 7  | 5  | -- | --          |
|            | Ca(ICCV2/PI489777)SNP_30575 | 142  | G | C | 8  | 9  | -- | --          |
|            | Ca(ICCV2/PI489777)SNP_30576 | 256  | C | T | 24 | 29 | -- | --          |
|            | Ca(ICCV2/PI489777)SNP_30577 | 322  | T | A | 26 | 33 | -- | --          |
| CakTC40544 | Ca(ICCV2/PI489777)SNP_30578 | 408  | G | A | 7  | 3  | -- | --          |
|            | Ca(ICCV2/PI489777)SNP_30579 | 591  | T | C | 6  | 5  | -- | --          |
|            | Ca(ICCV2/PI489777)SNP_30580 | 657  | T | C | 7  | 7  | -- | --          |
| CakTC42345 | Ca(ICCV2/PI489777)SNP_30581 | 400  | A | G | 8  | 22 | -- | --          |
|            | Ca(ICCV2/PI489777)SNP_30582 | 799  | C | G | 12 | 11 | -- | --          |
| CakTC25381 | Ca(ICCV2/PI489777)SNP_30583 | 700  | G | T | 28 | 11 | -- | --          |
|            | Ca(ICCV2/PI489777)SNP_30584 | 1043 | T | G | 10 | 5  | -- | --          |
| CakTC35075 | Ca(ICCV2/PI489777)SNP_30585 | 690  | A | T | 11 | 6  | -- | FAR1        |
|            | Ca(ICCV2/PI489777)SNP_30586 | 1666 | G | T | 12 | 3  | -- | FAR1        |
| CakTC26005 | Ca(ICCV2/PI489777)SNP_30587 | 570  | A | G | 7  | 4  | -- | --          |
| CakTC41568 | Ca(ICCV2/PI489777)SNP_30588 | 2167 | G | A | 13 | 7  | -- | --          |
|            | Ca(ICCV2/PI489777)SNP_30589 | 2169 | T | C | 13 | 7  | -- | --          |
| CakTC32764 | Ca(ICCV2/PI489777)SNP_30590 | 1459 | A | G | 3  | 3  | -- | --          |
| CakTC27195 | Ca(ICCV2/PI489777)SNP_30591 | 1063 | A | G | 5  | 6  | -- | --          |
|            | Ca(ICCV2/PI489777)SNP_30592 | 1198 | G | A | 5  | 6  | -- | --          |
| CakTC37807 | Ca(ICCV2/PI489777)SNP_30593 | 258  | C | T | 11 | 20 | -- | --          |
|            | Ca(ICCV2/PI489777)SNP_30594 | 357  | T | C | 12 | 23 | -- | --          |
| CakTC35334 | Ca(ICCV2/PI489777)SNP_30595 | 147  | C | T | 3  | 6  | -- | --          |
|            | Ca(ICCV2/PI489777)SNP_30596 | 396  | G | A | 3  | 7  | -- | --          |
| CakTC42864 | Ca(ICCV2/PI489777)SNP_30597 | 435  | C | T | 46 | 46 | -- | --          |
| CakTC32546 | Ca(ICCV2/PI489777)SNP_30598 | 336  | G | C | 7  | 28 | -- | --          |
|            | Ca(ICCV2/PI489777)SNP_30599 | 429  | T | C | 3  | 26 | -- | --          |
|            | Ca(ICCV2/PI489777)SNP_30600 | 486  | C | G | 3  | 27 | -- | --          |
|            | Ca(ICCV2/PI489777)SNP_30601 | 498  | T | A | 3  | 26 | -- | --          |
| CakTC33005 | Ca(ICCV2/PI489777)SNP_30602 | 451  | G | A | 4  | 4  | -- | TRAF        |
|            | Ca(ICCV2/PI489777)SNP_30603 | 1787 | A | G | 7  | 3  | -- | TRAF        |
|            | Ca(ICCV2/PI489777)SNP_30604 | 2059 | T | C | 5  | 5  | -- | TRAF        |
|            | Ca(ICCV2/PI489777)SNP_30605 | 2699 | G | A | 5  | 6  | -- | TRAF        |
| CakTC39141 | Ca(ICCV2/PI489777)SNP_30606 | 1032 | T | C | 4  | 5  | -- | --          |
|            | Ca(ICCV2/PI489777)SNP_30607 | 1041 | T | A | 4  | 5  | -- | --          |
|            | Ca(ICCV2/PI489777)SNP_30608 | 1107 | G | A | 3  | 5  | -- | --          |
|            | Ca(ICCV2/PI489777)SNP_30609 | 1191 | T | A | 3  | 5  | -- | --          |
|            | Ca(ICCV2/PI489777)SNP_30610 | 1353 | T | C | 3  | 3  | -- | --          |
| CakTC03291 | Ca(ICCV2/PI489777)SNP_30611 | 1708 | C | A | 11 | 9  | -- | --          |
|            | Ca(ICCV2/PI489777)SNP_30612 | 2319 | G | A | 12 | 5  | -- | --          |
|            | Ca(ICCV2/PI489777)SNP_30613 | 2500 | G | C | 6  | 12 | -- | --          |
| CakTC38889 | Ca(ICCV2/PI489777)SNP_30614 | 912  | A | G | 17 | 9  | -- | --          |
|            | Ca(ICCV2/PI489777)SNP_30615 | 922  | G | A | 16 | 12 | -- | --          |
|            | Ca(ICCV2/PI489777)SNP_30616 | 980  | G | C | 12 | 10 | -- | --          |
|            | Ca(ICCV2/PI489777)SNP_30617 | 983  | G | A | 12 | 7  | -- | --          |
|            | Ca(ICCV2/PI489777)SNP_30618 | 993  | G | T | 12 | 9  | -- | --          |
|            | Ca(ICCV2/PI489777)SNP_30619 | 1044 | G | A | 13 | 8  | -- | --          |
|            | Ca(ICCV2/PI489777)SNP_30620 | 1109 | G | T | 8  | 7  | -- | --          |
| CakTC42576 | Ca(ICCV2/PI489777)SNP_30621 | 460  | T | C | 4  | 4  | -- | --          |
| CakTC10035 | Ca(ICCV2/PI489777)SNP_30622 | 1365 | T | C | 3  | 3  | -- | --          |
|            | Ca(ICCV2/PI489777)SNP_30623 | 2025 | T | C | 4  | 4  | -- | --          |
| CakTC39299 | Ca(ICCV2/PI489777)SNP_30624 | 506  | G | A | 5  | 9  | -- | --          |
|            | Ca(ICCV2/PI489777)SNP_30625 | 1070 | A | G | 5  | 4  | -- | --          |
| CakTC38343 | Ca(ICCV2/PI489777)SNP_30626 | 707  | T | C | 3  | 9  | -- | --          |
|            | Ca(ICCV2/PI489777)SNP_30627 | 824  | C | G | 3  | 9  | -- | --          |
| CakTC37657 | Ca(ICCV2/PI489777)SNP_30628 | 526  | T | G | 15 | 8  | -- | --          |
|            | Ca(ICCV2/PI489777)SNP_30629 | 575  | A | T | 11 | 8  | -- | --          |
|            | Ca(ICCV2/PI489777)SNP_30630 | 789  | G | A | 18 | 14 | -- | --          |
|            | Ca(ICCV2/PI489777)SNP_30631 | 994  | A | G | 26 | 21 | -- | --          |

|            |                             |      |   |   |    |    |       |              |
|------------|-----------------------------|------|---|---|----|----|-------|--------------|
| CakTC33736 | Ca(ICCV2/PI489777)SNP_30632 | 383  | C | T | 7  | 4  | --    | --           |
|            | Ca(ICCV2/PI489777)SNP_30633 | 497  | T | C | 12 | 8  | --    | --           |
|            | Ca(ICCV2/PI489777)SNP_30634 | 536  | G | A | 12 | 9  | --    | --           |
|            | Ca(ICCV2/PI489777)SNP_30635 | 711  | T | A | 12 | 7  | --    | --           |
|            | Ca(ICCV2/PI489777)SNP_30636 | 1325 | A | G | 14 | 7  | --    | --           |
|            | Ca(ICCV2/PI489777)SNP_30637 | 1575 | G | A | 12 | 15 | --    | --           |
|            | Ca(ICCV2/PI489777)SNP_30638 | 1985 | A | T | 10 | 4  | --    | --           |
| CakTC25875 | Ca(ICCV2/PI489777)SNP_30639 | 307  | G | A | 5  | 3  | --    | --           |
| CakTC35328 | Ca(ICCV2/PI489777)SNP_30640 | 1557 | G | T | 19 | 10 | --    | --           |
|            | Ca(ICCV2/PI489777)SNP_30641 | 2787 | A | G | 14 | 7  | --    | --           |
|            | Ca(ICCV2/PI489777)SNP_30642 | 2841 | T | C | 13 | 7  | --    | --           |
|            | Ca(ICCV2/PI489777)SNP_30643 | 3096 | T | A | 27 | 17 | --    | --           |
|            | Ca(ICCV2/PI489777)SNP_30644 | 3308 | G | A | 20 | 10 | --    | --           |
| CakTC16060 | Ca(ICCV2/PI489777)SNP_30645 | 156  | C | A | 3  | 7  | --    | --           |
| CakTC11590 | Ca(ICCV2/PI489777)SNP_30646 | 355  | T | C | 64 | 74 | --    | --           |
|            | Ca(ICCV2/PI489777)SNP_30647 | 739  | G | A | 32 | 55 | --    | --           |
| CakTC41974 | Ca(ICCV2/PI489777)SNP_30648 | 1337 | A | G | 15 | 8  | --    | Sigma70-like |
| CakTC40553 | Ca(ICCV2/PI489777)SNP_30649 | 203  | A | G | 57 | 24 | --    | --           |
|            | Ca(ICCV2/PI489777)SNP_30650 | 233  | C | T | 63 | 26 | --    | --           |
| CakTC39301 | Ca(ICCV2/PI489777)SNP_30651 | 1870 | C | T | 15 | 6  | --    | --           |
|            | Ca(ICCV2/PI489777)SNP_30652 | 2147 | T | A | 10 | 9  | --    | --           |
|            | Ca(ICCV2/PI489777)SNP_30653 | 2168 | T | A | 12 | 10 | --    | --           |
|            | Ca(ICCV2/PI489777)SNP_30654 | 2290 | C | T | 15 | 6  | --    | --           |
|            | Ca(ICCV2/PI489777)SNP_30655 | 2364 | A | G | 18 | 4  | --    | --           |
|            | Ca(ICCV2/PI489777)SNP_30656 | 2366 | G | T | 18 | 4  | --    | --           |
| CakTC39872 | Ca(ICCV2/PI489777)SNP_30657 | 656  | G | T | 7  | 4  | --    | --           |
|            | Ca(ICCV2/PI489777)SNP_30658 | 662  | T | C | 8  | 4  | --    | --           |
| CakTC43101 | Ca(ICCV2/PI489777)SNP_30659 | 460  | A | C | 5  | 3  | --    | --           |
|            | Ca(ICCV2/PI489777)SNP_30660 | 478  | G | A | 4  | 3  | --    | --           |
|            | Ca(ICCV2/PI489777)SNP_30661 | 503  | G | C | 4  | 3  | --    | --           |
|            | Ca(ICCV2/PI489777)SNP_30662 | 1137 | G | A | 4  | 3  | --    | --           |
| CakTC23463 | Ca(ICCV2/PI489777)SNP_30663 | 166  | G | A | 20 | 5  | Shoot | --           |
|            | Ca(ICCV2/PI489777)SNP_30664 | 194  | G | T | 49 | 40 | Shoot | --           |
| CakTC24962 | Ca(ICCV2/PI489777)SNP_30665 | 415  | A | T | 34 | 10 | --    | --           |
|            | Ca(ICCV2/PI489777)SNP_30666 | 581  | C | T | 33 | 16 | --    | --           |
|            | Ca(ICCV2/PI489777)SNP_30667 | 1319 | A | T | 23 | 7  | --    | --           |
|            | Ca(ICCV2/PI489777)SNP_30668 | 1383 | G | T | 19 | 8  | --    | --           |
|            | Ca(ICCV2/PI489777)SNP_30669 | 1384 | T | G | 19 | 8  | --    | --           |
| CakTC41615 | Ca(ICCV2/PI489777)SNP_30670 | 560  | T | A | 6  | 7  | --    | --           |
| CakTC23474 | Ca(ICCV2/PI489777)SNP_30671 | 127  | A | G | 7  | 3  | --    | --           |
|            | Ca(ICCV2/PI489777)SNP_30672 | 128  | G | T | 7  | 3  | --    | --           |
|            | Ca(ICCV2/PI489777)SNP_30673 | 275  | A | C | 70 | 19 | --    | --           |
| CakTC41350 | Ca(ICCV2/PI489777)SNP_30674 | 446  | C | T | 68 | 56 | --    | --           |
| CakTC39255 | Ca(ICCV2/PI489777)SNP_30675 | 1541 | G | C | 4  | 4  | --    | ARID         |
|            | Ca(ICCV2/PI489777)SNP_30676 | 2838 | G | A | 4  | 3  | --    | ARID         |
| CakTC41357 | Ca(ICCV2/PI489777)SNP_30677 | 1961 | G | C | 12 | 11 | --    | --           |
| CakTC28504 | Ca(ICCV2/PI489777)SNP_30678 | 244  | C | T | 6  | 8  | --    | --           |
|            | Ca(ICCV2/PI489777)SNP_30679 | 274  | C | T | 7  | 8  | --    | --           |
|            | Ca(ICCV2/PI489777)SNP_30680 | 892  | G | A | 13 | 10 | --    | --           |
|            | Ca(ICCV2/PI489777)SNP_30681 | 2494 | G | A | 16 | 18 | --    | --           |
|            | Ca(ICCV2/PI489777)SNP_30682 | 2554 | T | G | 21 | 19 | --    | --           |
| CakTC35942 | Ca(ICCV2/PI489777)SNP_30683 | 1078 | G | A | 9  | 3  | --    | --           |
| CakTC25547 | Ca(ICCV2/PI489777)SNP_30684 | 221  | C | T | 15 | 7  | --    | --           |
|            | Ca(ICCV2/PI489777)SNP_30685 | 273  | A | G | 19 | 10 | --    | --           |
|            | Ca(ICCV2/PI489777)SNP_30686 | 891  | A | G | 12 | 3  | --    | --           |
|            | Ca(ICCV2/PI489777)SNP_30687 | 939  | T | G | 12 | 6  | --    | --           |
| CakTC33507 | Ca(ICCV2/PI489777)SNP_30688 | 160  | T | A | 19 | 6  | --    | --           |
|            | Ca(ICCV2/PI489777)SNP_30689 | 1210 | C | T | 15 | 16 | --    | --           |
|            | Ca(ICCV2/PI489777)SNP_30690 | 1477 | G | T | 19 | 15 | --    | --           |
|            | Ca(ICCV2/PI489777)SNP_30691 | 1775 | G | A | 13 | 10 | --    | --           |
|            | Ca(ICCV2/PI489777)SNP_30692 | 1800 | A | C | 12 | 10 | --    | --           |
|            | Ca(ICCV2/PI489777)SNP_30693 | 1867 | T | C | 4  | 4  | --    | --           |
| CakTC27952 | Ca(ICCV2/PI489777)SNP_30694 | 964  | G | A | 7  | 6  | --    | --           |
|            | Ca(ICCV2/PI489777)SNP_30695 | 1008 | A | G | 8  | 7  | --    | --           |
|            | Ca(ICCV2/PI489777)SNP_30696 | 1680 | A | T | 10 | 11 | --    | --           |
| CakTC42406 | Ca(ICCV2/PI489777)SNP_30697 | 707  | A | G | 4  | 3  | --    | --           |
| CakTC09413 | Ca(ICCV2/PI489777)SNP_30698 | 1482 | C | G | 4  | 3  | --    | --           |
| CakTC27361 | Ca(ICCV2/PI489777)SNP_30699 | 180  | T | C | 9  | 8  | --    | --           |
|            | Ca(ICCV2/PI489777)SNP_30700 | 1434 | A | G | 44 | 30 | --    | --           |
|            | Ca(ICCV2/PI489777)SNP_30701 | 1746 | G | A | 32 | 19 | --    | --           |
| CakTC26637 | Ca(ICCV2/PI489777)SNP_30702 | 701  | C | T | 4  | 5  | --    | --           |
| CakTC42427 | Ca(ICCV2/PI489777)SNP_30703 | 328  | C | T | 20 | 9  | --    | --           |
|            | Ca(ICCV2/PI489777)SNP_30704 | 631  | A | T | 24 | 19 | --    | --           |
|            | Ca(ICCV2/PI489777)SNP_30705 | 1282 | G | A | 26 | 9  | --    | --           |

|            |                            |       |   |   |    |    |           |    |
|------------|----------------------------|-------|---|---|----|----|-----------|----|
|            | Ca(ICC2/PI489777)SNP_30706 | 1774  | G | C | 12 | 13 | --        | -- |
|            | Ca(ICC2/PI489777)SNP_30707 | 1778  | G | T | 11 | 14 | --        | -- |
| CakTC29615 | Ca(ICC2/PI489777)SNP_30708 | 2321  | C | T | 69 | 34 | --        | -- |
|            | Ca(ICC2/PI489777)SNP_30709 | 2732  | A | G | 60 | 32 | --        | -- |
|            | Ca(ICC2/PI489777)SNP_30710 | 2789  | T | C | 39 | 44 | --        | -- |
| CakTC39839 | Ca(ICC2/PI489777)SNP_30711 | 771   | T | C | 15 | 12 | --        | -- |
| CakTC35975 | Ca(ICC2/PI489777)SNP_30712 | 506   | C | T | 8  | 6  | --        | -- |
|            | Ca(ICC2/PI489777)SNP_30713 | 610   | A | G | 6  | 7  | --        | -- |
|            | Ca(ICC2/PI489777)SNP_30714 | 1568  | G | T | 8  | 6  | --        | -- |
|            | Ca(ICC2/PI489777)SNP_30715 | 1588  | T | C | 8  | 8  | --        | -- |
|            | Ca(ICC2/PI489777)SNP_30716 | 1610  | G | A | 7  | 12 | --        | -- |
|            | Ca(ICC2/PI489777)SNP_30717 | 2032  | T | C | 13 | 10 | --        | -- |
|            | Ca(ICC2/PI489777)SNP_30718 | 2244  | T | G | 11 | 6  | --        | -- |
|            | Ca(ICC2/PI489777)SNP_30719 | 2808  | T | C | 5  | 4  | --        | -- |
|            | Ca(ICC2/PI489777)SNP_30720 | 3329  | C | T | 16 | 11 | --        | -- |
|            | Ca(ICC2/PI489777)SNP_30721 | 3331  | T | G | 14 | 11 | --        | -- |
|            | Ca(ICC2/PI489777)SNP_30722 | 3344  | G | A | 16 | 12 | --        | -- |
|            | Ca(ICC2/PI489777)SNP_30723 | 3392  | A | T | 15 | 12 | --        | -- |
|            | Ca(ICC2/PI489777)SNP_30724 | 3863  | G | A | 3  | 4  | --        | -- |
| CakTC28921 | Ca(ICC2/PI489777)SNP_30725 | 340   | T | G | 12 | 13 | --        | -- |
| CakTC11984 | Ca(ICC2/PI489777)SNP_30726 | 125   | A | T | 5  | 4  | --        | -- |
| CakTC28465 | Ca(ICC2/PI489777)SNP_30727 | 49    | G | A | 14 | 10 | --        | -- |
|            | Ca(ICC2/PI489777)SNP_30728 | 102   | C | G | 29 | 12 | --        | -- |
|            | Ca(ICC2/PI489777)SNP_30729 | 298   | C | G | 37 | 17 | --        | -- |
|            | Ca(ICC2/PI489777)SNP_30730 | 593   | G | A | 19 | 15 | --        | -- |
|            | Ca(ICC2/PI489777)SNP_30731 | 602   | A | G | 21 | 16 | --        | -- |
|            | Ca(ICC2/PI489777)SNP_30732 | 605   | G | A | 20 | 16 | --        | -- |
|            | Ca(ICC2/PI489777)SNP_30733 | 728   | C | T | 22 | 14 | --        | -- |
| CakTC43033 | Ca(ICC2/PI489777)SNP_30734 | 167   | G | T | 6  | 4  | --        | -- |
| CakTC10976 | Ca(ICC2/PI489777)SNP_30735 | 520   | C | G | 62 | 29 | --        | -- |
| CakTC09593 | Ca(ICC2/PI489777)SNP_30736 | 391   | G | A | 4  | 3  | --        | -- |
|            | Ca(ICC2/PI489777)SNP_30737 | 547   | C | G | 4  | 3  | --        | -- |
| CakTC24736 | Ca(ICC2/PI489777)SNP_30738 | 468   | T | G | 7  | 20 | --        | -- |
| CakTC41053 | Ca(ICC2/PI489777)SNP_30739 | 856   | T | G | 67 | 34 | Shoot     | -- |
|            | Ca(ICC2/PI489777)SNP_30740 | 1030  | T | C | 63 | 33 | Shoot     | -- |
|            | Ca(ICC2/PI489777)SNP_30741 | 1057  | T | C | 66 | 36 | Shoot     | -- |
|            | Ca(ICC2/PI489777)SNP_30742 | 1846  | T | G | 49 | 34 | Shoot     | -- |
|            | Ca(ICC2/PI489777)SNP_30743 | 2006  | A | G | 41 | 34 | Shoot     | -- |
|            | Ca(ICC2/PI489777)SNP_30744 | 2202  | A | G | 25 | 7  | Shoot     | -- |
| CakTC42475 | Ca(ICC2/PI489777)SNP_30745 | 291   | A | G | 5  | 6  | --        | -- |
|            | Ca(ICC2/PI489777)SNP_30746 | 321   | T | G | 5  | 6  | --        | -- |
| CakTC34825 | Ca(ICC2/PI489777)SNP_30747 | 392   | A | G | 7  | 10 | --        | -- |
|            | Ca(ICC2/PI489777)SNP_30748 | 407   | T | C | 7  | 9  | --        | -- |
|            | Ca(ICC2/PI489777)SNP_30749 | 458   | G | C | 5  | 7  | --        | -- |
| CakTC27241 | Ca(ICC2/PI489777)SNP_30750 | 1040  | G | A | 17 | 8  | --        | -- |
|            | Ca(ICC2/PI489777)SNP_30751 | 2193  | C | A | 9  | 10 | --        | -- |
|            | Ca(ICC2/PI489777)SNP_30752 | 2295  | C | T | 8  | 8  | --        | -- |
|            | Ca(ICC2/PI489777)SNP_30753 | 3059  | T | C | 14 | 4  | --        | -- |
|            | Ca(ICC2/PI489777)SNP_30754 | 3437  | A | G | 15 | 7  | --        | -- |
|            | Ca(ICC2/PI489777)SNP_30755 | 5247  | A | G | 30 | 9  | --        | -- |
|            | Ca(ICC2/PI489777)SNP_30756 | 6150  | T | A | 17 | 5  | --        | -- |
|            | Ca(ICC2/PI489777)SNP_30757 | 6303  | T | C | 14 | 7  | --        | -- |
|            | Ca(ICC2/PI489777)SNP_30758 | 8809  | A | C | 11 | 6  | --        | -- |
|            | Ca(ICC2/PI489777)SNP_30759 | 10582 | C | T | 23 | 14 | --        | -- |
| CakTC34129 | Ca(ICC2/PI489777)SNP_30760 | 366   | G | A | 10 | 4  | --        | -- |
|            | Ca(ICC2/PI489777)SNP_30761 | 1025  | G | A | 11 | 10 | --        | -- |
|            | Ca(ICC2/PI489777)SNP_30762 | 1037  | G | A | 11 | 10 | --        | -- |
|            | Ca(ICC2/PI489777)SNP_30763 | 2165  | C | G | 6  | 3  | --        | -- |
| CakTC39858 | Ca(ICC2/PI489777)SNP_30764 | 422   | A | G | 6  | 3  | --        | -- |
|            | Ca(ICC2/PI489777)SNP_30765 | 497   | T | C | 6  | 3  | --        | -- |
|            | Ca(ICC2/PI489777)SNP_30766 | 1173  | A | G | 4  | 3  | --        | -- |
|            | Ca(ICC2/PI489777)SNP_30767 | 1213  | A | C | 3  | 3  | --        | -- |
| CakTC28535 | Ca(ICC2/PI489777)SNP_30768 | 255   | A | C | 6  | 9  | --        | -- |
|            | Ca(ICC2/PI489777)SNP_30769 | 1032  | C | T | 15 | 3  | --        | -- |
|            | Ca(ICC2/PI489777)SNP_30770 | 1038  | T | C | 13 | 4  | --        | -- |
|            | Ca(ICC2/PI489777)SNP_30771 | 1049  | G | A | 11 | 4  | --        | -- |
| CakTC29045 | Ca(ICC2/PI489777)SNP_30772 | 516   | A | G | 27 | 17 | --        | -- |
|            | Ca(ICC2/PI489777)SNP_30773 | 639   | A | G | 34 | 23 | --        | -- |
|            | Ca(ICC2/PI489777)SNP_30774 | 828   | G | A | 24 | 18 | --        | -- |
|            | Ca(ICC2/PI489777)SNP_30775 | 1260  | T | C | 18 | 5  | --        | -- |
| CakTC38511 | Ca(ICC2/PI489777)SNP_30776 | 193   | A | T | 22 | 26 | --        | -- |
|            | Ca(ICC2/PI489777)SNP_30777 | 235   | G | A | 22 | 20 | --        | -- |
|            | Ca(ICC2/PI489777)SNP_30778 | 718   | T | C | 53 | 27 | --        | -- |
| CakTC29626 | Ca(ICC2/PI489777)SNP_30779 | 489   | C | T | 47 | 32 | Young_pod | -- |



|            |                            |      |   |   |    |    |           |             |
|------------|----------------------------|------|---|---|----|----|-----------|-------------|
|            | Ca(ICC2/PI489777)SNP_30780 | 711  | T | C | 31 | 29 | Young_pod | --          |
|            | Ca(ICC2/PI489777)SNP_30781 | 979  | C | T | 27 | 18 | Young_pod | --          |
|            | Ca(ICC2/PI489777)SNP_30782 | 1042 | A | C | 31 | 14 | Young_pod | --          |
| CakTC42374 | Ca(ICC2/PI489777)SNP_30783 | 682  | A | G | 12 | 8  | --        | --          |
| CakTC25703 | Ca(ICC2/PI489777)SNP_30784 | 742  | A | T | 29 | 15 | --        | --          |
|            | Ca(ICC2/PI489777)SNP_30785 | 757  | C | T | 35 | 15 | --        | --          |
|            | Ca(ICC2/PI489777)SNP_30786 | 916  | G | A | 49 | 20 | --        | --          |
|            | Ca(ICC2/PI489777)SNP_30787 | 925  | A | G | 61 | 21 | --        | --          |
|            | Ca(ICC2/PI489777)SNP_30788 | 964  | A | G | 64 | 26 | --        | --          |
|            | Ca(ICC2/PI489777)SNP_30789 | 1081 | C | T | 80 | 29 | --        | --          |
| CakTC28171 | Ca(ICC2/PI489777)SNP_30790 | 235  | C | T | 33 | 7  | --        | WRKY        |
|            | Ca(ICC2/PI489777)SNP_30791 | 479  | T | G | 63 | 18 | --        | WRKY        |
|            | Ca(ICC2/PI489777)SNP_30792 | 569  | A | G | 66 | 20 | --        | WRKY        |
|            | Ca(ICC2/PI489777)SNP_30793 | 1182 | G | A | 40 | 6  | --        | WRKY        |
|            | Ca(ICC2/PI489777)SNP_30794 | 1341 | A | G | 12 | 4  | --        | WRKY        |
|            | Ca(ICC2/PI489777)SNP_30795 | 1606 | A | G | 14 | 4  | --        | WRKY        |
|            | Ca(ICC2/PI489777)SNP_30796 | 1646 | C | T | 13 | 5  | --        | WRKY        |
|            | Ca(ICC2/PI489777)SNP_30797 | 4276 | G | A | 16 | 7  | --        | WRKY        |
|            | Ca(ICC2/PI489777)SNP_30798 | 4475 | G | T | 30 | 3  | --        | WRKY        |
|            | Ca(ICC2/PI489777)SNP_30799 | 4797 | T | C | 18 | 3  | --        | WRKY        |
|            | Ca(ICC2/PI489777)SNP_30800 | 4879 | A | C | 8  | 3  | --        | WRKY        |
|            | Ca(ICC2/PI489777)SNP_30801 | 5168 | T | C | 17 | 6  | --        | WRKY        |
|            | Ca(ICC2/PI489777)SNP_30802 | 5321 | C | A | 17 | 8  | --        | WRKY        |
|            | Ca(ICC2/PI489777)SNP_30803 | 5331 | T | C | 17 | 7  | --        | WRKY        |
|            | Ca(ICC2/PI489777)SNP_30804 | 5379 | A | G | 12 | 7  | --        | WRKY        |
| CakTC41443 | Ca(ICC2/PI489777)SNP_30805 | 779  | A | C | 5  | 5  | --        | --          |
|            | Ca(ICC2/PI489777)SNP_30806 | 1025 | G | A | 4  | 5  | --        | --          |
| CakTC42936 | Ca(ICC2/PI489777)SNP_30807 | 648  | G | A | 36 | 21 | --        | --          |
| CakTC14772 | Ca(ICC2/PI489777)SNP_30808 | 423  | G | C | 4  | 3  | --        | --          |
|            | Ca(ICC2/PI489777)SNP_30809 | 514  | C | T | 3  | 4  | --        | --          |
|            | Ca(ICC2/PI489777)SNP_30810 | 538  | C | T | 3  | 4  | --        | --          |
| CakTC32170 | Ca(ICC2/PI489777)SNP_30811 | 98   | G | A | 3  | 3  | --        | MYB         |
|            | Ca(ICC2/PI489777)SNP_30812 | 170  | T | A | 3  | 5  | --        | MYB         |
|            | Ca(ICC2/PI489777)SNP_30813 | 755  | C | T | 3  | 4  | --        | MYB         |
|            | Ca(ICC2/PI489777)SNP_30814 | 756  | T | A | 3  | 4  | --        | MYB         |
|            | Ca(ICC2/PI489777)SNP_30815 | 1088 | T | G | 7  | 4  | --        | MYB         |
|            | Ca(ICC2/PI489777)SNP_30816 | 1252 | A | C | 6  | 5  | --        | MYB         |
|            | Ca(ICC2/PI489777)SNP_30817 | 1349 | T | G | 5  | 3  | --        | MYB         |
| CakTC28354 | Ca(ICC2/PI489777)SNP_30818 | 474  | G | A | 33 | 12 | --        | --          |
|            | Ca(ICC2/PI489777)SNP_30819 | 654  | G | A | 22 | 12 | --        | --          |
|            | Ca(ICC2/PI489777)SNP_30820 | 726  | A | G | 22 | 12 | --        | --          |
|            | Ca(ICC2/PI489777)SNP_30821 | 1268 | T | C | 22 | 19 | --        | --          |
|            | Ca(ICC2/PI489777)SNP_30822 | 1428 | G | A | 21 | 20 | --        | --          |
|            | Ca(ICC2/PI489777)SNP_30823 | 1756 | A | G | 27 | 12 | --        | --          |
|            | Ca(ICC2/PI489777)SNP_30824 | 1852 | A | G | 17 | 14 | --        | --          |
|            | Ca(ICC2/PI489777)SNP_30825 | 2250 | A | G | 21 | 14 | --        | --          |
|            | Ca(ICC2/PI489777)SNP_30826 | 2301 | T | A | 18 | 18 | --        | --          |
| CakTC37117 | Ca(ICC2/PI489777)SNP_30827 | 402  | G | A | 20 | 13 | --        | --          |
|            | Ca(ICC2/PI489777)SNP_30828 | 1082 | T | A | 14 | 7  | --        | --          |
|            | Ca(ICC2/PI489777)SNP_30829 | 1316 | G | A | 15 | 6  | --        | --          |
|            | Ca(ICC2/PI489777)SNP_30830 | 1682 | C | T | 18 | 8  | --        | --          |
|            | Ca(ICC2/PI489777)SNP_30831 | 2303 | A | G | 27 | 14 | --        | --          |
| CakTC38506 | Ca(ICC2/PI489777)SNP_30832 | 162  | A | G | 3  | 3  | --        | --          |
|            | Ca(ICC2/PI489777)SNP_30833 | 242  | G | A | 9  | 3  | --        | --          |
|            | Ca(ICC2/PI489777)SNP_30834 | 294  | A | G | 9  | 3  | --        | --          |
|            | Ca(ICC2/PI489777)SNP_30835 | 309  | A | G | 9  | 3  | --        | --          |
|            | Ca(ICC2/PI489777)SNP_30836 | 371  | C | T | 7  | 3  | --        | --          |
|            | Ca(ICC2/PI489777)SNP_30837 | 381  | A | T | 8  | 3  | --        | --          |
|            | Ca(ICC2/PI489777)SNP_30838 | 462  | A | T | 11 | 3  | --        | --          |
|            | Ca(ICC2/PI489777)SNP_30839 | 468  | T | C | 11 | 3  | --        | --          |
| CakTC25935 | Ca(ICC2/PI489777)SNP_30840 | 234  | G | A | 19 | 4  | --        | --          |
|            | Ca(ICC2/PI489777)SNP_30841 | 277  | A | G | 56 | 22 | --        | --          |
|            | Ca(ICC2/PI489777)SNP_30842 | 290  | C | T | 66 | 24 | --        | --          |
|            | Ca(ICC2/PI489777)SNP_30843 | 302  | A | G | 61 | 20 | --        | --          |
| CakTC29211 | Ca(ICC2/PI489777)SNP_30844 | 1480 | C | T | 5  | 3  | --        | CCHC        |
|            | Ca(ICC2/PI489777)SNP_30845 | 2431 | A | G | 11 | 4  | --        | CCHC        |
|            | Ca(ICC2/PI489777)SNP_30846 | 2818 | T | C | 3  | 3  | --        | CCHC        |
| CakTC38663 | Ca(ICC2/PI489777)SNP_30847 | 1395 | G | A | 5  | 3  | --        | --          |
| CakTC32966 | Ca(ICC2/PI489777)SNP_30848 | 1481 | G | A | 8  | 3  | --        | Bromodomain |
|            | Ca(ICC2/PI489777)SNP_30849 | 1520 | T | C | 9  | 5  | --        | Bromodomain |
|            | Ca(ICC2/PI489777)SNP_30850 | 2297 | A | T | 9  | 6  | --        | Bromodomain |
|            | Ca(ICC2/PI489777)SNP_30851 | 2463 | T | C | 7  | 3  | --        | Bromodomain |
|            | Ca(ICC2/PI489777)SNP_30852 | 2592 | G | A | 4  | 3  | --        | Bromodomain |
|            | Ca(ICC2/PI489777)SNP_30853 | 2742 | C | T | 3  | 3  | --        | Bromodomain |

|            |                             |      |   |   |    |    |        |             |
|------------|-----------------------------|------|---|---|----|----|--------|-------------|
|            | Ca(ICCV2/PI489777)SNP_30854 | 2745 | C | T | 3  | 3  | --     | Bromodomain |
| CakTC27233 | Ca(ICCV2/PI489777)SNP_30855 | 629  | G | A | 20 | 10 | --     | --          |
|            | Ca(ICCV2/PI489777)SNP_30856 | 1692 | G | T | 30 | 21 | --     | --          |
|            | Ca(ICCV2/PI489777)SNP_30857 | 1698 | G | A | 33 | 21 | --     | --          |
|            | Ca(ICCV2/PI489777)SNP_30858 | 2698 | C | A | 36 | 18 | --     | --          |
| CakTC43374 | Ca(ICCV2/PI489777)SNP_30859 | 136  | A | T | 11 | 7  | --     | --          |
| CakTC33020 | Ca(ICCV2/PI489777)SNP_30860 | 222  | C | T | 9  | 6  | --     | ABI3VP1     |
|            | Ca(ICCV2/PI489777)SNP_30861 | 262  | G | C | 9  | 7  | --     | ABI3VP1     |
| CakTC26237 | Ca(ICCV2/PI489777)SNP_30862 | 441  | G | A | 18 | 4  | --     | --          |
|            | Ca(ICCV2/PI489777)SNP_30863 | 451  | G | A | 19 | 4  | --     | --          |
|            | Ca(ICCV2/PI489777)SNP_30864 | 525  | C | T | 18 | 5  | --     | --          |
|            | Ca(ICCV2/PI489777)SNP_30865 | 564  | C | A | 17 | 6  | --     | --          |
| CakTC26625 | Ca(ICCV2/PI489777)SNP_30866 | 143  | T | C | 12 | 5  | Flower | bud         |
|            | Ca(ICCV2/PI489777)SNP_30867 | 228  | T | G | 12 | 5  | Flower | bud         |
|            | Ca(ICCV2/PI489777)SNP_30868 | 354  | C | A | 10 | 6  | Flower | bud         |
|            | Ca(ICCV2/PI489777)SNP_30869 | 471  | T | C | 12 | 7  | Flower | bud         |
|            | Ca(ICCV2/PI489777)SNP_30870 | 591  | C | G | 12 | 6  | Flower | bud         |
|            | Ca(ICCV2/PI489777)SNP_30871 | 1084 | A | G | 4  | 4  | Flower | bud         |
| CakTC43350 | Ca(ICCV2/PI489777)SNP_30872 | 643  | G | C | 10 | 4  | --     | --          |
| CakTC11117 | Ca(ICCV2/PI489777)SNP_30873 | 154  | C | T | 11 | 4  | --     | --          |
|            | Ca(ICCV2/PI489777)SNP_30874 | 412  | A | G | 43 | 29 | --     | --          |
|            | Ca(ICCV2/PI489777)SNP_30875 | 655  | A | G | 52 | 40 | --     | --          |
|            | Ca(ICCV2/PI489777)SNP_30876 | 891  | T | G | 23 | 17 | --     | --          |
|            | Ca(ICCV2/PI489777)SNP_30877 | 952  | A | G | 3  | 5  | --     | --          |
| CakTC28994 | Ca(ICCV2/PI489777)SNP_30878 | 254  | T | C | 3  | 3  | --     | --          |
| CakTC25174 | Ca(ICCV2/PI489777)SNP_30879 | 415  | T | C | 15 | 4  | Shoot  | --          |
| CakTC25712 | Ca(ICCV2/PI489777)SNP_30880 | 414  | G | A | 8  | 9  | --     | --          |
|            | Ca(ICCV2/PI489777)SNP_30881 | 474  | C | A | 16 | 19 | --     | --          |
|            | Ca(ICCV2/PI489777)SNP_30882 | 900  | T | C | 16 | 25 | --     | --          |
|            | Ca(ICCV2/PI489777)SNP_30883 | 945  | C | T | 3  | 22 | --     | --          |
|            | Ca(ICCV2/PI489777)SNP_30884 | 2942 | T | A | 94 | 23 | --     | --          |
|            | Ca(ICCV2/PI489777)SNP_30885 | 3017 | G | A | 91 | 25 | --     | --          |
|            | Ca(ICCV2/PI489777)SNP_30886 | 3169 | T | G | 59 | 21 | --     | --          |
|            | Ca(ICCV2/PI489777)SNP_30887 | 3209 | C | G | 49 | 20 | --     | --          |
| CakTC38983 | Ca(ICCV2/PI489777)SNP_30888 | 281  | A | T | 8  | 7  | --     | --          |
|            | Ca(ICCV2/PI489777)SNP_30889 | 641  | C | T | 4  | 9  | --     | --          |
|            | Ca(ICCV2/PI489777)SNP_30890 | 1034 | G | C | 9  | 10 | --     | --          |
|            | Ca(ICCV2/PI489777)SNP_30891 | 1037 | C | T | 9  | 10 | --     | --          |
|            | Ca(ICCV2/PI489777)SNP_30892 | 1205 | A | G | 9  | 10 | --     | --          |
|            | Ca(ICCV2/PI489777)SNP_30893 | 1208 | C | T | 10 | 10 | --     | --          |
|            | Ca(ICCV2/PI489777)SNP_30894 | 1361 | A | C | 8  | 5  | --     | --          |
| CakTC12304 | Ca(ICCV2/PI489777)SNP_30895 | 471  | G | A | 5  | 9  | --     | --          |
|            | Ca(ICCV2/PI489777)SNP_30896 | 699  | T | G | 10 | 6  | --     | --          |
|            | Ca(ICCV2/PI489777)SNP_30897 | 1050 | C | G | 6  | 3  | --     | --          |
|            | Ca(ICCV2/PI489777)SNP_30898 | 1080 | T | C | 4  | 3  | --     | --          |
|            | Ca(ICCV2/PI489777)SNP_30899 | 4681 | C | T | 6  | 5  | --     | --          |
| CakTC42277 | Ca(ICCV2/PI489777)SNP_30900 | 652  | T | C | 4  | 5  | Flower | bud         |
| CakTC41910 | Ca(ICCV2/PI489777)SNP_30901 | 58   | C | A | 3  | 5  | --     | --          |
|            | Ca(ICCV2/PI489777)SNP_30902 | 343  | A | G | 7  | 17 | --     | --          |
|            | Ca(ICCV2/PI489777)SNP_30903 | 823  | T | C | 3  | 9  | --     | --          |
| CakTC28980 | Ca(ICCV2/PI489777)SNP_30904 | 580  | G | A | 3  | 5  | --     | C2C2-GATA   |
| CakTC24538 | Ca(ICCV2/PI489777)SNP_30905 | 1273 | A | G | 11 | 3  | --     | --          |
|            | Ca(ICCV2/PI489777)SNP_30906 | 1456 | C | G | 6  | 4  | --     | --          |
| CakTC29741 | Ca(ICCV2/PI489777)SNP_30907 | 955  | A | T | 4  | 3  | --     | --          |
|            | Ca(ICCV2/PI489777)SNP_30908 | 1415 | C | T | 6  | 6  | --     | --          |
| CakTC15264 | Ca(ICCV2/PI489777)SNP_30909 | 404  | T | C | 11 | 6  | --     | --          |
| CakTC27445 | Ca(ICCV2/PI489777)SNP_30910 | 210  | C | G | 8  | 3  | --     | --          |
|            | Ca(ICCV2/PI489777)SNP_30911 | 1554 | T | C | 17 | 8  | --     | --          |
|            | Ca(ICCV2/PI489777)SNP_30912 | 1557 | C | T | 17 | 9  | --     | --          |
| CakTC27921 | Ca(ICCV2/PI489777)SNP_30913 | 452  | A | G | 11 | 5  | --     | --          |
|            | Ca(ICCV2/PI489777)SNP_30914 | 472  | A | G | 10 | 5  | --     | --          |
|            | Ca(ICCV2/PI489777)SNP_30915 | 989  | C | T | 9  | 7  | --     | --          |
|            | Ca(ICCV2/PI489777)SNP_30916 | 1397 | C | A | 11 | 4  | --     | --          |
|            | Ca(ICCV2/PI489777)SNP_30917 | 1441 | T | C | 9  | 7  | --     | --          |
|            | Ca(ICCV2/PI489777)SNP_30918 | 1525 | G | A | 10 | 14 | --     | --          |
|            | Ca(ICCV2/PI489777)SNP_30919 | 1646 | A | G | 15 | 13 | --     | --          |
|            | Ca(ICCV2/PI489777)SNP_30920 | 1766 | G | A | 19 | 14 | --     | --          |
|            | Ca(ICCV2/PI489777)SNP_30921 | 1958 | A | T | 21 | 5  | --     | --          |
|            | Ca(ICCV2/PI489777)SNP_30922 | 1975 | A | G | 21 | 5  | --     | --          |
|            | Ca(ICCV2/PI489777)SNP_30923 | 2068 | T | C | 17 | 8  | --     | --          |
|            | Ca(ICCV2/PI489777)SNP_30924 | 2086 | T | A | 16 | 9  | --     | --          |
|            | Ca(ICCV2/PI489777)SNP_30925 | 2299 | C | A | 20 | 16 | --     | --          |
| CakTC37623 | Ca(ICCV2/PI489777)SNP_30926 | 97   | C | G | 11 | 4  | --     | --          |
|            | Ca(ICCV2/PI489777)SNP_30927 | 459  | C | T | 13 | 15 | --     | --          |

|            |                             |      |   |   |    |    |    |      |
|------------|-----------------------------|------|---|---|----|----|----|------|
|            | Ca(ICCV2/PI489777)SNP_30928 | 636  | A | C | 11 | 11 | -- | --   |
|            | Ca(ICCV2/PI489777)SNP_30929 | 843  | C | T | 12 | 11 | -- | --   |
|            | Ca(ICCV2/PI489777)SNP_30930 | 969  | G | C | 20 | 8  | -- | --   |
| CakTC33416 | Ca(ICCV2/PI489777)SNP_30931 | 141  | C | A | 35 | 43 | -- | --   |
|            | Ca(ICCV2/PI489777)SNP_30932 | 498  | T | C | 11 | 23 | -- | --   |
| CakTC10215 | Ca(ICCV2/PI489777)SNP_30933 | 736  | G | A | 8  | 4  | -- | --   |
|            | Ca(ICCV2/PI489777)SNP_30934 | 739  | G | A | 8  | 4  | -- | --   |
|            | Ca(ICCV2/PI489777)SNP_30935 | 799  | A | G | 8  | 4  | -- | --   |
|            | Ca(ICCV2/PI489777)SNP_30936 | 896  | T | A | 7  | 4  | -- | --   |
|            | Ca(ICCV2/PI489777)SNP_30937 | 920  | T | C | 8  | 4  | -- | --   |
|            | Ca(ICCV2/PI489777)SNP_30938 | 1078 | G | A | 8  | 3  | -- | --   |
|            | Ca(ICCV2/PI489777)SNP_30939 | 1102 | C | T | 8  | 3  | -- | --   |
|            | Ca(ICCV2/PI489777)SNP_30940 | 1217 | G | C | 9  | 3  | -- | --   |
|            | Ca(ICCV2/PI489777)SNP_30941 | 1219 | C | T | 9  | 3  | -- | --   |
| CakTC41933 | Ca(ICCV2/PI489777)SNP_30942 | 713  | T | C | 14 | 5  | -- | --   |
| CakTC35566 | Ca(ICCV2/PI489777)SNP_30943 | 356  | G | A | 11 | 3  | -- | --   |
|            | Ca(ICCV2/PI489777)SNP_30944 | 770  | C | T | 22 | 10 | -- | --   |
|            | Ca(ICCV2/PI489777)SNP_30945 | 821  | C | G | 21 | 12 | -- | --   |
|            | Ca(ICCV2/PI489777)SNP_30946 | 983  | G | A | 27 | 4  | -- | --   |
|            | Ca(ICCV2/PI489777)SNP_30947 | 1013 | A | G | 24 | 4  | -- | --   |
|            | Ca(ICCV2/PI489777)SNP_30948 | 1325 | A | G | 16 | 5  | -- | --   |
|            | Ca(ICCV2/PI489777)SNP_30949 | 1910 | C | T | 14 | 9  | -- | --   |
|            | Ca(ICCV2/PI489777)SNP_30950 | 2150 | C | T | 7  | 10 | -- | --   |
|            | Ca(ICCV2/PI489777)SNP_30951 | 2705 | G | A | 23 | 8  | -- | --   |
|            | Ca(ICCV2/PI489777)SNP_30952 | 3377 | G | A | 13 | 3  | -- | --   |
|            | Ca(ICCV2/PI489777)SNP_30953 | 3731 | A | C | 18 | 7  | -- | --   |
|            | Ca(ICCV2/PI489777)SNP_30954 | 3917 | A | G | 24 | 10 | -- | --   |
|            | Ca(ICCV2/PI489777)SNP_30955 | 4294 | A | G | 8  | 4  | -- | --   |
| CakTC37503 | Ca(ICCV2/PI489777)SNP_30956 | 271  | A | G | 10 | 10 | -- | --   |
|            | Ca(ICCV2/PI489777)SNP_30957 | 1162 | G | T | 13 | 23 | -- | --   |
|            | Ca(ICCV2/PI489777)SNP_30958 | 1182 | C | T | 11 | 23 | -- | --   |
|            | Ca(ICCV2/PI489777)SNP_30959 | 1196 | T | C | 12 | 25 | -- | --   |
| CakTC39943 | Ca(ICCV2/PI489777)SNP_30960 | 961  | A | G | 17 | 7  | -- | --   |
| CakTC30216 | Ca(ICCV2/PI489777)SNP_30961 | 1118 | G | A | 7  | 9  | -- | --   |
| CakTC39196 | Ca(ICCV2/PI489777)SNP_30962 | 805  | A | T | 4  | 6  | -- | --   |
|            | Ca(ICCV2/PI489777)SNP_30963 | 1336 | T | C | 6  | 3  | -- | --   |
| CakTC25508 | Ca(ICCV2/PI489777)SNP_30964 | 1473 | G | A | 67 | 25 | -- | --   |
| CakTC24512 | Ca(ICCV2/PI489777)SNP_30965 | 1250 | A | G | 5  | 8  | -- | bZIP |
|            | Ca(ICCV2/PI489777)SNP_30966 | 1359 | G | A | 4  | 6  | -- | bZIP |
| CakTC31574 | Ca(ICCV2/PI489777)SNP_30967 | 146  | T | A | 6  | 3  | -- | --   |
|            | Ca(ICCV2/PI489777)SNP_30968 | 1647 | G | A | 20 | 14 | -- | --   |
|            | Ca(ICCV2/PI489777)SNP_30969 | 1885 | A | T | 19 | 15 | -- | --   |
|            | Ca(ICCV2/PI489777)SNP_30970 | 2003 | C | T | 19 | 14 | -- | --   |
|            | Ca(ICCV2/PI489777)SNP_30971 | 2744 | T | A | 14 | 11 | -- | --   |
|            | Ca(ICCV2/PI489777)SNP_30972 | 2992 | C | T | 13 | 6  | -- | --   |
|            | Ca(ICCV2/PI489777)SNP_30973 | 3143 | G | C | 11 | 5  | -- | --   |
| CakTC43257 | Ca(ICCV2/PI489777)SNP_30974 | 169  | T | C | 83 | 9  | -- | --   |
| CakTC23782 | Ca(ICCV2/PI489777)SNP_30975 | 81   | C | T | 5  | 7  | -- | --   |
|            | Ca(ICCV2/PI489777)SNP_30976 | 599  | C | T | 71 | 25 | -- | --   |
|            | Ca(ICCV2/PI489777)SNP_30977 | 697  | A | G | 62 | 28 | -- | --   |
|            | Ca(ICCV2/PI489777)SNP_30978 | 1197 | C | T | 49 | 31 | -- | --   |
| CakTC09632 | Ca(ICCV2/PI489777)SNP_30979 | 296  | T | A | 4  | 3  | -- | --   |
|            | Ca(ICCV2/PI489777)SNP_30980 | 301  | C | A | 6  | 3  | -- | --   |
| CakTC39083 | Ca(ICCV2/PI489777)SNP_30981 | 860  | G | C | 6  | 4  | -- | --   |
| CakTC02504 | Ca(ICCV2/PI489777)SNP_30982 | 704  | C | T | 18 | 8  | -- | --   |
| CakTC24330 | Ca(ICCV2/PI489777)SNP_30983 | 427  | G | A | 37 | 6  | -- | --   |
|            | Ca(ICCV2/PI489777)SNP_30984 | 796  | C | A | 39 | 13 | -- | --   |
|            | Ca(ICCV2/PI489777)SNP_30985 | 1909 | T | G | 38 | 22 | -- | --   |
| CakTC37600 | Ca(ICCV2/PI489777)SNP_30986 | 929  | T | G | 13 | 3  | -- | --   |
| CakTC24752 | Ca(ICCV2/PI489777)SNP_30987 | 653  | T | C | 9  | 12 | -- | --   |
|            | Ca(ICCV2/PI489777)SNP_30988 | 1990 | G | C | 3  | 5  | -- | --   |
|            | Ca(ICCV2/PI489777)SNP_30989 | 2242 | A | G | 8  | 9  | -- | --   |
| CakTC23426 | Ca(ICCV2/PI489777)SNP_30990 | 421  | T | C | 10 | 7  | -- | HSF  |
| CakTC10097 | Ca(ICCV2/PI489777)SNP_30991 | 533  | A | G | 11 | 4  | -- | --   |
| CakTC39815 | Ca(ICCV2/PI489777)SNP_30992 | 851  | T | C | 33 | 10 | -- | --   |
| CakTC08151 | Ca(ICCV2/PI489777)SNP_30993 | 1851 | A | G | 5  | 4  | -- | --   |
| CakTC33878 | Ca(ICCV2/PI489777)SNP_30994 | 165  | T | A | 23 | 25 | -- | --   |
| CakTC38442 | Ca(ICCV2/PI489777)SNP_30995 | 318  | G | A | 31 | 10 | -- | --   |
|            | Ca(ICCV2/PI489777)SNP_30996 | 903  | C | T | 18 | 6  | -- | --   |
|            | Ca(ICCV2/PI489777)SNP_30997 | 918  | G | T | 17 | 7  | -- | --   |
|            | Ca(ICCV2/PI489777)SNP_30998 | 978  | T | A | 17 | 6  | -- | --   |
|            | Ca(ICCV2/PI489777)SNP_30999 | 982  | A | G | 16 | 6  | -- | --   |
| CakTC23803 | Ca(ICCV2/PI489777)SNP_31000 | 1179 | T | C | 22 | 5  | -- | --   |
|            | Ca(ICCV2/PI489777)SNP_31001 | 3447 | G | A | 16 | 3  | -- | --   |

|            |                            |      |   |   |    |    |      |      |
|------------|----------------------------|------|---|---|----|----|------|------|
|            | Ca(ICC2/PI489777)SNP_31002 | 3880 | C | A | 9  | 6  | --   | --   |
|            | Ca(ICC2/PI489777)SNP_31003 | 4033 | A | G | 7  | 6  | --   | --   |
| CakTC36875 | Ca(ICC2/PI489777)SNP_31004 | 136  | C | A | 24 | 16 | --   | --   |
|            | Ca(ICC2/PI489777)SNP_31005 | 184  | A | T | 31 | 20 | --   | --   |
|            | Ca(ICC2/PI489777)SNP_31006 | 205  | G | C | 32 | 22 | --   | --   |
|            | Ca(ICC2/PI489777)SNP_31007 | 442  | A | C | 43 | 20 | --   | --   |
| CakTC15393 | Ca(ICC2/PI489777)SNP_31008 | 379  | A | G | 3  | 4  | --   | --   |
| CakTC42877 | Ca(ICC2/PI489777)SNP_31009 | 173  | A | T | 21 | 4  | --   | --   |
|            | Ca(ICC2/PI489777)SNP_31010 | 247  | C | T | 22 | 11 | --   | --   |
|            | Ca(ICC2/PI489777)SNP_31011 | 401  | C | G | 54 | 41 | --   | --   |
|            | Ca(ICC2/PI489777)SNP_31012 | 585  | A | G | 44 | 46 | --   | --   |
|            | Ca(ICC2/PI489777)SNP_31013 | 720  | G | A | 39 | 37 | --   | --   |
|            | Ca(ICC2/PI489777)SNP_31014 | 764  | C | T | 38 | 38 | --   | --   |
|            | Ca(ICC2/PI489777)SNP_31015 | 781  | G | A | 28 | 34 | --   | --   |
| CakTC25729 | Ca(ICC2/PI489777)SNP_31016 | 553  | C | T | 17 | 14 | --   | --   |
|            | Ca(ICC2/PI489777)SNP_31017 | 748  | G | A | 3  | 8  | --   | --   |
|            | Ca(ICC2/PI489777)SNP_31018 | 1846 | C | T | 8  | 17 | --   | --   |
|            | Ca(ICC2/PI489777)SNP_31019 | 1936 | A | T | 8  | 23 | --   | --   |
|            | Ca(ICC2/PI489777)SNP_31020 | 2027 | C | T | 7  | 21 | --   | --   |
|            | Ca(ICC2/PI489777)SNP_31021 | 2106 | A | C | 6  | 17 | --   | --   |
|            | Ca(ICC2/PI489777)SNP_31022 | 2112 | C | G | 5  | 17 | --   | --   |
|            | Ca(ICC2/PI489777)SNP_31023 | 2117 | T | A | 6  | 17 | --   | --   |
|            | Ca(ICC2/PI489777)SNP_31024 | 2163 | G | C | 6  | 16 | --   | --   |
|            | Ca(ICC2/PI489777)SNP_31025 | 2191 | C | G | 6  | 16 | --   | --   |
|            | Ca(ICC2/PI489777)SNP_31026 | 2279 | C | A | 5  | 7  | --   | --   |
|            | Ca(ICC2/PI489777)SNP_31027 | 2288 | C | T | 4  | 8  | --   | --   |
| CakTC30906 | Ca(ICC2/PI489777)SNP_31028 | 1005 | A | G | 6  | 5  | --   | GRAS |
|            | Ca(ICC2/PI489777)SNP_31029 | 2193 | A | G | 7  | 6  | --   | GRAS |
|            | Ca(ICC2/PI489777)SNP_31030 | 2488 | G | A | 6  | 3  | --   | GRAS |
|            | Ca(ICC2/PI489777)SNP_31031 | 2513 | A | G | 6  | 3  | --   | GRAS |
| CakTC42552 | Ca(ICC2/PI489777)SNP_31032 | 318  | T | C | 4  | 5  | --   | --   |
|            | Ca(ICC2/PI489777)SNP_31033 | 460  | A | C | 6  | 5  | --   | --   |
| CakTC31086 | Ca(ICC2/PI489777)SNP_31034 | 249  | C | G | 7  | 8  | --   | --   |
| CakTC03881 | Ca(ICC2/PI489777)SNP_31035 | 83   | G | A | 5  | 9  | --   | --   |
|            | Ca(ICC2/PI489777)SNP_31036 | 249  | T | G | 5  | 8  | --   | --   |
| CakTC27918 | Ca(ICC2/PI489777)SNP_31037 | 171  | C | T | 12 | 3  | --   | --   |
|            | Ca(ICC2/PI489777)SNP_31038 | 737  | T | C | 42 | 6  | --   | --   |
|            | Ca(ICC2/PI489777)SNP_31039 | 933  | T | C | 32 | 3  | --   | --   |
| CakTC37912 | Ca(ICC2/PI489777)SNP_31040 | 928  | T | G | 7  | 4  | --   | --   |
|            | Ca(ICC2/PI489777)SNP_31041 | 943  | C | A | 7  | 4  | --   | --   |
|            | Ca(ICC2/PI489777)SNP_31042 | 952  | T | G | 7  | 4  | --   | --   |
|            | Ca(ICC2/PI489777)SNP_31043 | 961  | A | T | 7  | 4  | --   | --   |
|            | Ca(ICC2/PI489777)SNP_31044 | 993  | T | C | 7  | 4  | --   | --   |
| CakTC38861 | Ca(ICC2/PI489777)SNP_31045 | 1015 | A | G | 39 | 20 | --   | --   |
|            | Ca(ICC2/PI489777)SNP_31046 | 1042 | A | G | 45 | 27 | --   | --   |
|            | Ca(ICC2/PI489777)SNP_31047 | 1243 | T | C | 38 | 24 | --   | --   |
|            | Ca(ICC2/PI489777)SNP_31048 | 1246 | A | G | 45 | 23 | --   | --   |
| CakTC38458 | Ca(ICC2/PI489777)SNP_31049 | 290  | G | C | 7  | 6  | Root | --   |
|            | Ca(ICC2/PI489777)SNP_31050 | 1075 | G | T | 5  | 11 | Root | --   |
| CakTC11441 | Ca(ICC2/PI489777)SNP_31051 | 961  | C | T | 9  | 6  | --   | --   |
|            | Ca(ICC2/PI489777)SNP_31052 | 979  | G | T | 9  | 6  | --   | --   |
|            | Ca(ICC2/PI489777)SNP_31053 | 1947 | A | C | 6  | 6  | --   | --   |
| CakTC29326 | Ca(ICC2/PI489777)SNP_31054 | 537  | T | C | 3  | 5  | --   | GRAS |
|            | Ca(ICC2/PI489777)SNP_31055 | 1804 | C | T | 6  | 8  | --   | GRAS |
|            | Ca(ICC2/PI489777)SNP_31056 | 2068 | A | G | 5  | 9  | --   | GRAS |
| CakTC32272 | Ca(ICC2/PI489777)SNP_31057 | 967  | T | C | 9  | 5  | --   | WRKY |
|            | Ca(ICC2/PI489777)SNP_31058 | 1066 | A | G | 5  | 6  | --   | WRKY |
|            | Ca(ICC2/PI489777)SNP_31059 | 1189 | G | A | 6  | 4  | --   | WRKY |
|            | Ca(ICC2/PI489777)SNP_31060 | 1847 | G | C | 8  | 7  | --   | WRKY |
| CakTC25250 | Ca(ICC2/PI489777)SNP_31061 | 576  | T | C | 19 | 5  | --   | --   |
|            | Ca(ICC2/PI489777)SNP_31062 | 881  | G | A | 15 | 11 | --   | --   |
| CakTC39601 | Ca(ICC2/PI489777)SNP_31063 | 243  | C | A | 5  | 19 | --   | --   |
| CakTC42180 | Ca(ICC2/PI489777)SNP_31064 | 460  | G | A | 15 | 4  | --   | MADS |
| CakTC38080 | Ca(ICC2/PI489777)SNP_31065 | 699  | G | C | 4  | 9  | --   | --   |
|            | Ca(ICC2/PI489777)SNP_31066 | 1195 | A | G | 3  | 7  | --   | --   |
|            | Ca(ICC2/PI489777)SNP_31067 | 1275 | C | T | 6  | 5  | --   | --   |
|            | Ca(ICC2/PI489777)SNP_31068 | 1321 | G | A | 5  | 3  | --   | --   |
|            | Ca(ICC2/PI489777)SNP_31069 | 1366 | C | T | 5  | 3  | --   | --   |
| CakTC33805 | Ca(ICC2/PI489777)SNP_31070 | 971  | T | C | 29 | 7  | --   | --   |
|            | Ca(ICC2/PI489777)SNP_31071 | 1031 | C | T | 29 | 9  | --   | --   |
|            | Ca(ICC2/PI489777)SNP_31072 | 1288 | C | T | 29 | 12 | --   | --   |
|            | Ca(ICC2/PI489777)SNP_31073 | 1297 | A | T | 30 | 14 | --   | --   |
|            | Ca(ICC2/PI489777)SNP_31074 | 1457 | G | T | 24 | 8  | --   | --   |
|            | Ca(ICC2/PI489777)SNP_31075 | 1742 | T | C | 16 | 9  | --   | --   |

|            |                            |      |   |   |    |    |        |         |
|------------|----------------------------|------|---|---|----|----|--------|---------|
|            | Ca(ICC2/PI489777)SNP_31076 | 1786 | T | G | 14 | 8  | --     | --      |
|            | Ca(ICC2/PI489777)SNP_31077 | 1889 | A | C | 9  | 7  | --     | --      |
|            | Ca(ICC2/PI489777)SNP_31078 | 1943 | C | A | 11 | 9  | --     | --      |
|            | Ca(ICC2/PI489777)SNP_31079 | 1982 | C | A | 9  | 11 | --     | --      |
| CakTC33474 | Ca(ICC2/PI489777)SNP_31080 | 492  | C | G | 10 | 6  | --     | --      |
|            | Ca(ICC2/PI489777)SNP_31081 | 618  | A | G | 9  | 6  | --     | --      |
|            | Ca(ICC2/PI489777)SNP_31082 | 645  | C | G | 9  | 5  | --     | --      |
| CakTC34538 | Ca(ICC2/PI489777)SNP_31083 | 89   | C | G | 9  | 7  | --     | --      |
|            | Ca(ICC2/PI489777)SNP_31084 | 202  | G | A | 6  | 9  | --     | --      |
|            | Ca(ICC2/PI489777)SNP_31085 | 759  | A | T | 12 | 8  | --     | --      |
| CakTC26506 | Ca(ICC2/PI489777)SNP_31086 | 1101 | C | T | 21 | 41 | --     | --      |
| CakTC23245 | Ca(ICC2/PI489777)SNP_31087 | 233  | C | T | 18 | 13 | --     | --      |
| CakTC33564 | Ca(ICC2/PI489777)SNP_31088 | 336  | T | C | 4  | 12 | Root   | --      |
| CakTC36416 | Ca(ICC2/PI489777)SNP_31089 | 1441 | A | C | 29 | 6  | --     | --      |
| CakTC30647 | Ca(ICC2/PI489777)SNP_31090 | 600  | A | C | 9  | 19 | --     | --      |
|            | Ca(ICC2/PI489777)SNP_31091 | 772  | T | C | 9  | 24 | --     | --      |
|            | Ca(ICC2/PI489777)SNP_31092 | 1014 | C | G | 7  | 16 | --     | --      |
| CakTC43045 | Ca(ICC2/PI489777)SNP_31093 | 915  | G | C | 7  | 7  | Shoot  | --      |
|            | Ca(ICC2/PI489777)SNP_31094 | 2012 | A | C | 8  | 12 | Shoot  | --      |
| CakTC09699 | Ca(ICC2/PI489777)SNP_31095 | 847  | G | A | 6  | 11 | Flower | bud     |
|            | Ca(ICC2/PI489777)SNP_31096 | 1080 | C | T | 3  | 3  | Flower | bud     |
| CakTC25320 | Ca(ICC2/PI489777)SNP_31097 | 533  | T | A | 17 | 16 | --     | --      |
| CakTC37427 | Ca(ICC2/PI489777)SNP_31098 | 113  | G | A | 3  | 5  | --     | --      |
|            | Ca(ICC2/PI489777)SNP_31099 | 122  | A | G | 3  | 5  | --     | --      |
|            | Ca(ICC2/PI489777)SNP_31100 | 144  | G | C | 5  | 7  | --     | --      |
|            | Ca(ICC2/PI489777)SNP_31101 | 161  | G | C | 4  | 7  | --     | --      |
|            | Ca(ICC2/PI489777)SNP_31102 | 479  | A | T | 10 | 8  | --     | --      |
|            | Ca(ICC2/PI489777)SNP_31103 | 526  | G | C | 9  | 8  | --     | --      |
|            | Ca(ICC2/PI489777)SNP_31104 | 530  | C | T | 6  | 8  | --     | --      |
|            | Ca(ICC2/PI489777)SNP_31105 | 1046 | A | G | 3  | 9  | --     | --      |
| CakTC38836 | Ca(ICC2/PI489777)SNP_31106 | 758  | C | T | 22 | 35 | --     | --      |
| CakTC31243 | Ca(ICC2/PI489777)SNP_31107 | 747  | A | T | 6  | 4  | --     | --      |
|            | Ca(ICC2/PI489777)SNP_31108 | 756  | T | C | 5  | 4  | --     | --      |
|            | Ca(ICC2/PI489777)SNP_31109 | 780  | G | A | 6  | 5  | --     | --      |
|            | Ca(ICC2/PI489777)SNP_31110 | 1557 | T | G | 7  | 6  | --     | --      |
|            | Ca(ICC2/PI489777)SNP_31111 | 2276 | C | T | 4  | 9  | --     | --      |
| CakTC33738 | Ca(ICC2/PI489777)SNP_31112 | 463  | T | A | 11 | 15 | --     | --      |
| CakTC40903 | Ca(ICC2/PI489777)SNP_31113 | 335  | T | C | 8  | 7  | --     | --      |
|            | Ca(ICC2/PI489777)SNP_31114 | 782  | C | G | 6  | 11 | --     | --      |
|            | Ca(ICC2/PI489777)SNP_31115 | 866  | T | C | 5  | 10 | --     | --      |
| CakTC27106 | Ca(ICC2/PI489777)SNP_31116 | 105  | A | C | 4  | 11 | --     | --      |
|            | Ca(ICC2/PI489777)SNP_31117 | 134  | C | T | 4  | 9  | --     | --      |
|            | Ca(ICC2/PI489777)SNP_31118 | 684  | C | T | 19 | 16 | --     | --      |
|            | Ca(ICC2/PI489777)SNP_31119 | 945  | A | C | 7  | 7  | --     | --      |
|            | Ca(ICC2/PI489777)SNP_31120 | 1317 | T | C | 12 | 7  | --     | --      |
|            | Ca(ICC2/PI489777)SNP_31121 | 1656 | C | A | 12 | 8  | --     | --      |
|            | Ca(ICC2/PI489777)SNP_31122 | 2505 | G | A | 5  | 8  | --     | --      |
| CakTC30285 | Ca(ICC2/PI489777)SNP_31123 | 1027 | G | C | 5  | 3  | --     | NAC     |
| CakTC40894 | Ca(ICC2/PI489777)SNP_31124 | 231  | G | A | 3  | 4  | --     | --      |
|            | Ca(ICC2/PI489777)SNP_31125 | 1140 | T | G | 10 | 9  | --     | --      |
|            | Ca(ICC2/PI489777)SNP_31126 | 1161 | G | A | 7  | 9  | --     | --      |
|            | Ca(ICC2/PI489777)SNP_31127 | 1305 | T | C | 7  | 8  | --     | --      |
|            | Ca(ICC2/PI489777)SNP_31128 | 1453 | A | G | 5  | 11 | --     | --      |
| CakTC26231 | Ca(ICC2/PI489777)SNP_31129 | 1837 | C | T | 9  | 3  | --     | --      |
|            | Ca(ICC2/PI489777)SNP_31130 | 2101 | G | A | 8  | 5  | --     | --      |
|            | Ca(ICC2/PI489777)SNP_31131 | 2869 | T | C | 6  | 4  | --     | --      |
| CakTC11616 | Ca(ICC2/PI489777)SNP_31132 | 254  | C | A | 4  | 3  | --     | --      |
|            | Ca(ICC2/PI489777)SNP_31133 | 269  | G | T | 4  | 3  | --     | --      |
| CakTC29375 | Ca(ICC2/PI489777)SNP_31134 | 107  | G | A | 13 | 7  | --     | AUX/IAA |
|            | Ca(ICC2/PI489777)SNP_31135 | 847  | A | G | 3  | 9  | --     | AUX/IAA |
| CakTC02599 | Ca(ICC2/PI489777)SNP_31136 | 467  | T | C | 6  | 3  | --     | --      |
|            | Ca(ICC2/PI489777)SNP_31137 | 1265 | C | T | 3  | 4  | --     | --      |
| CakTC39830 | Ca(ICC2/PI489777)SNP_31138 | 258  | T | C | 10 | 4  | --     | --      |
|            | Ca(ICC2/PI489777)SNP_31139 | 417  | A | G | 12 | 7  | --     | --      |
|            | Ca(ICC2/PI489777)SNP_31140 | 439  | T | C | 12 | 7  | --     | --      |
|            | Ca(ICC2/PI489777)SNP_31141 | 456  | A | G | 11 | 7  | --     | --      |
|            | Ca(ICC2/PI489777)SNP_31142 | 464  | C | G | 12 | 7  | --     | --      |
|            | Ca(ICC2/PI489777)SNP_31143 | 466  | G | C | 12 | 7  | --     | --      |
|            | Ca(ICC2/PI489777)SNP_31144 | 495  | A | G | 12 | 6  | --     | --      |
|            | Ca(ICC2/PI489777)SNP_31145 | 507  | C | T | 11 | 7  | --     | --      |
|            | Ca(ICC2/PI489777)SNP_31146 | 895  | A | T | 8  | 16 | --     | --      |
|            | Ca(ICC2/PI489777)SNP_31147 | 957  | A | G | 8  | 17 | --     | --      |
|            | Ca(ICC2/PI489777)SNP_31148 | 1007 | C | T | 10 | 14 | --     | --      |
|            | Ca(ICC2/PI489777)SNP_31149 | 1237 | G | C | 10 | 7  | --     | --      |

|            |                             |      |   |   |    |    |    |    |
|------------|-----------------------------|------|---|---|----|----|----|----|
| CakTC27795 | Ca(ICCV2/PI489777)SNP_31150 | 920  | C | G | 3  | 3  | -- | -- |
| CakTC31122 | Ca(ICCV2/PI489777)SNP_31151 | 1899 | C | G | 7  | 5  | -- | -- |
|            | Ca(ICCV2/PI489777)SNP_31152 | 2920 | T | C | 13 | 7  | -- | -- |
| CakTC10011 | Ca(ICCV2/PI489777)SNP_31153 | 568  | G | C | 28 | 4  | -- | -- |
|            | Ca(ICCV2/PI489777)SNP_31154 | 876  | G | A | 15 | 8  | -- | -- |
|            | Ca(ICCV2/PI489777)SNP_31155 | 998  | T | A | 11 | 7  | -- | -- |
|            | Ca(ICCV2/PI489777)SNP_31156 | 1076 | G | A | 11 | 6  | -- | -- |
|            | Ca(ICCV2/PI489777)SNP_31157 | 1188 | T | C | 10 | 5  | -- | -- |
| CakTC39649 | Ca(ICCV2/PI489777)SNP_31158 | 414  | A | C | 5  | 3  | -- | -- |
|            | Ca(ICCV2/PI489777)SNP_31159 | 429  | T | C | 5  | 4  | -- | -- |
|            | Ca(ICCV2/PI489777)SNP_31160 | 547  | A | G | 4  | 7  | -- | -- |
|            | Ca(ICCV2/PI489777)SNP_31161 | 739  | G | A | 4  | 7  | -- | -- |
|            | Ca(ICCV2/PI489777)SNP_31162 | 1138 | A | G | 3  | 8  | -- | -- |
| CakTC40919 | Ca(ICCV2/PI489777)SNP_31163 | 803  | T | C | 28 | 13 | -- | -- |
| CakTC35346 | Ca(ICCV2/PI489777)SNP_31164 | 643  | A | C | 13 | 8  | -- | -- |
|            | Ca(ICCV2/PI489777)SNP_31165 | 1391 | G | A | 9  | 5  | -- | -- |
|            | Ca(ICCV2/PI489777)SNP_31166 | 1543 | G | A | 5  | 8  | -- | -- |
| CakTC39514 | Ca(ICCV2/PI489777)SNP_31167 | 1016 | C | T | 7  | 4  | -- | -- |
|            | Ca(ICCV2/PI489777)SNP_31168 | 1097 | C | T | 4  | 4  | -- | -- |
| CakTC29238 | Ca(ICCV2/PI489777)SNP_31169 | 872  | G | C | 24 | 7  | -- | -- |
| CakTC38638 | Ca(ICCV2/PI489777)SNP_31170 | 206  | C | A | 13 | 3  | -- | -- |
|            | Ca(ICCV2/PI489777)SNP_31171 | 212  | C | G | 12 | 3  | -- | -- |
|            | Ca(ICCV2/PI489777)SNP_31172 | 275  | G | A | 26 | 6  | -- | -- |
|            | Ca(ICCV2/PI489777)SNP_31173 | 353  | G | A | 37 | 11 | -- | -- |
|            | Ca(ICCV2/PI489777)SNP_31174 | 479  | A | G | 31 | 12 | -- | -- |
|            | Ca(ICCV2/PI489777)SNP_31175 | 490  | A | C | 25 | 11 | -- | -- |
|            | Ca(ICCV2/PI489777)SNP_31176 | 893  | G | T | 36 | 18 | -- | -- |
|            | Ca(ICCV2/PI489777)SNP_31177 | 1205 | A | T | 34 | 15 | -- | -- |
|            | Ca(ICCV2/PI489777)SNP_31178 | 1506 | T | C | 31 | 14 | -- | -- |
| CakTC32991 | Ca(ICCV2/PI489777)SNP_31179 | 515  | T | A | 4  | 3  | -- | -- |
| CakTC09968 | Ca(ICCV2/PI489777)SNP_31180 | 2002 | G | A | 3  | 3  | -- | -- |
| CakTC42492 | Ca(ICCV2/PI489777)SNP_31181 | 944  | C | T | 19 | 6  | -- | -- |
|            | Ca(ICCV2/PI489777)SNP_31182 | 1178 | A | G | 20 | 8  | -- | -- |
| CakTC28369 | Ca(ICCV2/PI489777)SNP_31183 | 398  | C | T | 48 | 30 | -- | -- |
|            | Ca(ICCV2/PI489777)SNP_31184 | 825  | T | C | 27 | 34 | -- | -- |
|            | Ca(ICCV2/PI489777)SNP_31185 | 1479 | A | G | 36 | 43 | -- | -- |
|            | Ca(ICCV2/PI489777)SNP_31186 | 1556 | T | C | 30 | 35 | -- | -- |
|            | Ca(ICCV2/PI489777)SNP_31187 | 1637 | G | A | 28 | 23 | -- | -- |
|            | Ca(ICCV2/PI489777)SNP_31188 | 1749 | G | A | 5  | 8  | -- | -- |
|            | Ca(ICCV2/PI489777)SNP_31189 | 1755 | G | A | 5  | 7  | -- | -- |
| CakTC26362 | Ca(ICCV2/PI489777)SNP_31190 | 204  | T | A | 7  | 3  | -- | -- |
|            | Ca(ICCV2/PI489777)SNP_31191 | 240  | A | T | 9  | 3  | -- | -- |
|            | Ca(ICCV2/PI489777)SNP_31192 | 244  | C | T | 9  | 4  | -- | -- |
| CakTC30997 | Ca(ICCV2/PI489777)SNP_31193 | 471  | A | G | 38 | 7  | -- | -- |
|            | Ca(ICCV2/PI489777)SNP_31194 | 641  | G | T | 45 | 9  | -- | -- |
|            | Ca(ICCV2/PI489777)SNP_31195 | 1544 | A | G | 16 | 5  | -- | -- |
|            | Ca(ICCV2/PI489777)SNP_31196 | 1799 | G | A | 17 | 7  | -- | -- |
|            | Ca(ICCV2/PI489777)SNP_31197 | 1874 | C | A | 22 | 6  | -- | -- |
| CakTC16534 | Ca(ICCV2/PI489777)SNP_31198 | 473  | T | C | 7  | 3  | -- | -- |
|            | Ca(ICCV2/PI489777)SNP_31199 | 569  | G | A | 6  | 3  | -- | -- |
| CakTC27357 | Ca(ICCV2/PI489777)SNP_31200 | 789  | G | A | 39 | 26 | -- | -- |
|            | Ca(ICCV2/PI489777)SNP_31201 | 830  | T | C | 40 | 36 | -- | -- |
|            | Ca(ICCV2/PI489777)SNP_31202 | 1065 | T | C | 70 | 28 | -- | -- |
|            | Ca(ICCV2/PI489777)SNP_31203 | 1117 | A | G | 69 | 28 | -- | -- |
|            | Ca(ICCV2/PI489777)SNP_31204 | 1164 | T | A | 74 | 29 | -- | -- |
|            | Ca(ICCV2/PI489777)SNP_31205 | 1212 | C | T | 81 | 27 | -- | -- |
|            | Ca(ICCV2/PI489777)SNP_31206 | 1495 | T | C | 87 | 21 | -- | -- |
| CakTC41474 | Ca(ICCV2/PI489777)SNP_31207 | 588  | G | C | 17 | 12 | -- | -- |
| CakTC37894 | Ca(ICCV2/PI489777)SNP_31208 | 126  | A | G | 13 | 7  | -- | -- |
|            | Ca(ICCV2/PI489777)SNP_31209 | 335  | G | T | 59 | 29 | -- | -- |
|            | Ca(ICCV2/PI489777)SNP_31210 | 347  | T | C | 59 | 29 | -- | -- |
| CakTC36955 | Ca(ICCV2/PI489777)SNP_31211 | 46   | T | C | 8  | 6  | -- | -- |
|            | Ca(ICCV2/PI489777)SNP_31212 | 50   | G | A | 12 | 7  | -- | -- |
|            | Ca(ICCV2/PI489777)SNP_31213 | 474  | T | C | 24 | 13 | -- | -- |
|            | Ca(ICCV2/PI489777)SNP_31214 | 550  | G | C | 22 | 10 | -- | -- |
|            | Ca(ICCV2/PI489777)SNP_31215 | 1161 | C | T | 11 | 9  | -- | -- |
|            | Ca(ICCV2/PI489777)SNP_31216 | 1659 | A | G | 12 | 19 | -- | -- |
|            | Ca(ICCV2/PI489777)SNP_31217 | 2277 | C | A | 19 | 3  | -- | -- |
| CakTC42126 | Ca(ICCV2/PI489777)SNP_31218 | 491  | C | T | 4  | 4  | -- | -- |
|            | Ca(ICCV2/PI489777)SNP_31219 | 500  | A | G | 3  | 3  | -- | -- |
|            | Ca(ICCV2/PI489777)SNP_31220 | 515  | A | C | 5  | 3  | -- | -- |
|            | Ca(ICCV2/PI489777)SNP_31221 | 635  | A | G | 4  | 4  | -- | -- |
|            | Ca(ICCV2/PI489777)SNP_31222 | 1377 | G | A | 4  | 3  | -- | -- |
| CakTC34282 | Ca(ICCV2/PI489777)SNP_31223 | 312  | G | A | 9  | 3  | -- | -- |

|            |                             |      |   |   |     |     |        |         |
|------------|-----------------------------|------|---|---|-----|-----|--------|---------|
| CakTC35628 | Ca(ICCV2/PI489777)SNP_31224 | 66   | C | T | 10  | 3   | --     | --      |
|            | Ca(ICCV2/PI489777)SNP_31225 | 393  | T | C | 13  | 16  | --     | --      |
|            | Ca(ICCV2/PI489777)SNP_31226 | 1269 | C | T | 14  | 8   | --     | --      |
|            | Ca(ICCV2/PI489777)SNP_31227 | 1953 | T | C | 18  | 7   | --     | --      |
|            | Ca(ICCV2/PI489777)SNP_31228 | 2716 | G | A | 13  | 12  | --     | --      |
|            | Ca(ICCV2/PI489777)SNP_31229 | 2718 | G | A | 14  | 12  | --     | --      |
|            | Ca(ICCV2/PI489777)SNP_31230 | 2727 | G | A | 15  | 13  | --     | --      |
|            | Ca(ICCV2/PI489777)SNP_31231 | 2891 | T | C | 9   | 12  | --     | --      |
|            | Ca(ICCV2/PI489777)SNP_31232 | 2930 | T | G | 10  | 11  | --     | --      |
|            | Ca(ICCV2/PI489777)SNP_31233 | 3064 | G | A | 9   | 6   | --     | --      |
| CakTC42229 | Ca(ICCV2/PI489777)SNP_31234 | 285  | C | T | 9   | 6   | Flower | bud     |
|            | Ca(ICCV2/PI489777)SNP_31235 | 1393 | C | T | 11  | 13  | Flower | bud     |
| CakTC33095 | Ca(ICCV2/PI489777)SNP_31236 | 276  | T | A | 72  | 53  | --     | --      |
|            | Ca(ICCV2/PI489777)SNP_31237 | 297  | G | T | 72  | 53  | --     | --      |
|            | Ca(ICCV2/PI489777)SNP_31238 | 339  | G | A | 68  | 50  | --     | --      |
|            | Ca(ICCV2/PI489777)SNP_31239 | 466  | T | G | 13  | 17  | --     | --      |
| CakTC43309 | Ca(ICCV2/PI489777)SNP_31240 | 66   | T | C | 6   | 3   | --     | --      |
|            | Ca(ICCV2/PI489777)SNP_31241 | 327  | A | G | 7   | 5   | --     | --      |
|            | Ca(ICCV2/PI489777)SNP_31242 | 415  | C | A | 7   | 5   | --     | --      |
| CakTC29366 | Ca(ICCV2/PI489777)SNP_31243 | 633  | C | T | 5   | 3   | --     | Jumonji |
| CakTC29954 | Ca(ICCV2/PI489777)SNP_31244 | 240  | C | A | 16  | 7   | Root   | --      |
|            | Ca(ICCV2/PI489777)SNP_31245 | 283  | T | G | 17  | 7   | Root   | --      |
|            | Ca(ICCV2/PI489777)SNP_31246 | 407  | T | G | 12  | 11  | Root   | --      |
|            | Ca(ICCV2/PI489777)SNP_31247 | 436  | G | A | 23  | 11  | Root   | --      |
|            | Ca(ICCV2/PI489777)SNP_31248 | 535  | A | G | 22  | 10  | Root   | --      |
|            | Ca(ICCV2/PI489777)SNP_31249 | 718  | A | G | 18  | 9   | Root   | --      |
|            | Ca(ICCV2/PI489777)SNP_31250 | 800  | A | G | 17  | 8   | Root   | --      |
|            | Ca(ICCV2/PI489777)SNP_31251 | 1501 | C | T | 17  | 15  | Root   | --      |
|            | Ca(ICCV2/PI489777)SNP_31252 | 1516 | T | G | 12  | 15  | Root   | --      |
|            | Ca(ICCV2/PI489777)SNP_31253 | 1561 | C | T | 11  | 15  | Root   | --      |
|            | Ca(ICCV2/PI489777)SNP_31254 | 1576 | T | C | 10  | 15  | Root   | --      |
| CakTC33232 | Ca(ICCV2/PI489777)SNP_31255 | 132  | A | C | 144 | 128 | --     | --      |
| CakTC29435 | Ca(ICCV2/PI489777)SNP_31256 | 163  | T | C | 18  | 21  | --     | --      |
|            | Ca(ICCV2/PI489777)SNP_31257 | 223  | A | G | 34  | 49  | --     | --      |
|            | Ca(ICCV2/PI489777)SNP_31258 | 307  | A | G | 129 | 138 | --     | --      |
|            | Ca(ICCV2/PI489777)SNP_31259 | 400  | T | G | 188 | 198 | --     | --      |
|            | Ca(ICCV2/PI489777)SNP_31260 | 471  | C | T | 225 | 229 | --     | --      |
|            | Ca(ICCV2/PI489777)SNP_31261 | 631  | C | G | 217 | 280 | --     | --      |
| CakTC40105 | Ca(ICCV2/PI489777)SNP_31262 | 453  | A | G | 36  | 44  | --     | --      |
|            | Ca(ICCV2/PI489777)SNP_31263 | 981  | C | T | 37  | 38  | --     | --      |
|            | Ca(ICCV2/PI489777)SNP_31264 | 1224 | T | C | 25  | 23  | --     | --      |
|            | Ca(ICCV2/PI489777)SNP_31265 | 1245 | G | A | 24  | 20  | --     | --      |
|            | Ca(ICCV2/PI489777)SNP_31266 | 1390 | A | G | 11  | 9   | --     | --      |
| CakTC36717 | Ca(ICCV2/PI489777)SNP_31267 | 1832 | T | C | 22  | 12  | --     | --      |
|            | Ca(ICCV2/PI489777)SNP_31268 | 2213 | T | C | 7   | 7   | --     | --      |
| CakTC22411 | Ca(ICCV2/PI489777)SNP_31269 | 364  | C | G | 115 | 60  | --     | --      |
|            | Ca(ICCV2/PI489777)SNP_31270 | 517  | G | A | 136 | 58  | --     | --      |
| CakTC32533 | Ca(ICCV2/PI489777)SNP_31271 | 1845 | C | T | 12  | 17  | --     | --      |
|            | Ca(ICCV2/PI489777)SNP_31272 | 1858 | C | T | 10  | 16  | --     | --      |
| CakTC28344 | Ca(ICCV2/PI489777)SNP_31273 | 440  | G | T | 237 | 107 | --     | --      |
| CakTC41887 | Ca(ICCV2/PI489777)SNP_31274 | 1401 | T | C | 13  | 3   | --     | --      |
| CakTC32306 | Ca(ICCV2/PI489777)SNP_31275 | 279  | C | T | 4   | 3   | --     | --      |
|            | Ca(ICCV2/PI489777)SNP_31276 | 1558 | G | T | 7   | 3   | --     | --      |
| CakTC32277 | Ca(ICCV2/PI489777)SNP_31277 | 1292 | A | G | 28  | 27  | --     | --      |
| CakTC41280 | Ca(ICCV2/PI489777)SNP_31278 | 764  | T | C | 5   | 6   | --     | SET     |
|            | Ca(ICCV2/PI489777)SNP_31279 | 2252 | A | T | 9   | 3   | --     | SET     |
| CakTC36003 | Ca(ICCV2/PI489777)SNP_31280 | 1353 | T | C | 29  | 7   | --     | --      |
| CakTC35490 | Ca(ICCV2/PI489777)SNP_31281 | 284  | G | T | 13  | 6   | --     | --      |
|            | Ca(ICCV2/PI489777)SNP_31282 | 296  | C | G | 11  | 5   | --     | --      |
|            | Ca(ICCV2/PI489777)SNP_31283 | 333  | T | A | 11  | 7   | --     | --      |
|            | Ca(ICCV2/PI489777)SNP_31284 | 377  | G | A | 11  | 8   | --     | --      |
|            | Ca(ICCV2/PI489777)SNP_31285 | 539  | G | A | 19  | 3   | --     | --      |
|            | Ca(ICCV2/PI489777)SNP_31286 | 1736 | G | A | 7   | 14  | --     | --      |
|            | Ca(ICCV2/PI489777)SNP_31287 | 2195 | G | A | 9   | 11  | --     | --      |
|            | Ca(ICCV2/PI489777)SNP_31288 | 2279 | G | A | 14  | 11  | --     | --      |
|            | Ca(ICCV2/PI489777)SNP_31289 | 2319 | A | G | 15  | 11  | --     | --      |
|            | Ca(ICCV2/PI489777)SNP_31290 | 3206 | A | G | 7   | 7   | --     | --      |
|            | Ca(ICCV2/PI489777)SNP_31291 | 3313 | C | A | 7   | 6   | --     | --      |
|            | Ca(ICCV2/PI489777)SNP_31292 | 3329 | T | A | 8   | 6   | --     | --      |
|            | Ca(ICCV2/PI489777)SNP_31293 | 3636 | T | A | 9   | 3   | --     | --      |
| CakTC28729 | Ca(ICCV2/PI489777)SNP_31294 | 845  | G | A | 8   | 3   | --     | --      |
|            | Ca(ICCV2/PI489777)SNP_31295 | 899  | A | G | 8   | 3   | --     | --      |
| CakTC07728 | Ca(ICCV2/PI489777)SNP_31296 | 399  | A | T | 3   | 12  | --     | --      |
|            | Ca(ICCV2/PI489777)SNP_31297 | 444  | A | G | 3   | 11  | --     | --      |

|            |                            |      |   |   |     |    |    |              |
|------------|----------------------------|------|---|---|-----|----|----|--------------|
|            | Ca(ICC2/PI489777)SNP_31298 | 456  | A | G | 3   | 10 | -- | --           |
|            | Ca(ICC2/PI489777)SNP_31299 | 494  | G | T | 3   | 11 | -- | --           |
|            | Ca(ICC2/PI489777)SNP_31300 | 544  | C | G | 3   | 7  | -- | --           |
|            | Ca(ICC2/PI489777)SNP_31301 | 723  | G | A | 3   | 4  | -- | --           |
| CakTC40806 | Ca(ICC2/PI489777)SNP_31302 | 1251 | C | T | 4   | 3  | -- | MYB-related  |
|            | Ca(ICC2/PI489777)SNP_31303 | 1316 | C | G | 4   | 3  | -- | MYB-related  |
| CakTC37903 | Ca(ICC2/PI489777)SNP_31304 | 888  | C | G | 27  | 11 | -- | --           |
| CakTC37612 | Ca(ICC2/PI489777)SNP_31305 | 137  | G | A | 13  | 6  | -- | --           |
|            | Ca(ICC2/PI489777)SNP_31306 | 155  | C | G | 15  | 11 | -- | --           |
|            | Ca(ICC2/PI489777)SNP_31307 | 161  | A | G | 15  | 11 | -- | --           |
|            | Ca(ICC2/PI489777)SNP_31308 | 267  | A | C | 13  | 12 | -- | --           |
|            | Ca(ICC2/PI489777)SNP_31309 | 887  | T | C | 9   | 17 | -- | --           |
| CakTC33769 | Ca(ICC2/PI489777)SNP_31310 | 1827 | T | C | 5   | 3  | -- | --           |
|            | Ca(ICC2/PI489777)SNP_31311 | 1857 | G | T | 6   | 3  | -- | --           |
|            | Ca(ICC2/PI489777)SNP_31312 | 2196 | C | A | 4   | 5  | -- | --           |
| CakTC39330 | Ca(ICC2/PI489777)SNP_31313 | 669  | C | A | 13  | 4  | -- | --           |
|            | Ca(ICC2/PI489777)SNP_31314 | 714  | T | C | 13  | 3  | -- | --           |
|            | Ca(ICC2/PI489777)SNP_31315 | 855  | C | G | 9   | 9  | -- | --           |
|            | Ca(ICC2/PI489777)SNP_31316 | 930  | A | G | 16  | 8  | -- | --           |
|            | Ca(ICC2/PI489777)SNP_31317 | 1082 | A | G | 26  | 7  | -- | --           |
|            | Ca(ICC2/PI489777)SNP_31318 | 1095 | C | T | 25  | 6  | -- | --           |
|            | Ca(ICC2/PI489777)SNP_31319 | 1359 | T | G | 20  | 4  | -- | --           |
|            | Ca(ICC2/PI489777)SNP_31320 | 1427 | T | C | 12  | 3  | -- | --           |
| CakTC41752 | Ca(ICC2/PI489777)SNP_31321 | 839  | A | G | 14  | 6  | -- | --           |
|            | Ca(ICC2/PI489777)SNP_31322 | 887  | T | C | 14  | 7  | -- | --           |
|            | Ca(ICC2/PI489777)SNP_31323 | 926  | T | G | 12  | 6  | -- | --           |
|            | Ca(ICC2/PI489777)SNP_31324 | 1016 | A | C | 9   | 4  | -- | --           |
|            | Ca(ICC2/PI489777)SNP_31325 | 1073 | A | T | 8   | 7  | -- | --           |
|            | Ca(ICC2/PI489777)SNP_31326 | 1892 | A | G | 16  | 5  | -- | --           |
| CakTC42750 | Ca(ICC2/PI489777)SNP_31327 | 127  | G | T | 3   | 4  | -- | --           |
|            | Ca(ICC2/PI489777)SNP_31328 | 841  | T | C | 4   | 7  | -- | --           |
|            | Ca(ICC2/PI489777)SNP_31329 | 1042 | A | G | 4   | 9  | -- | --           |
| CakTC22364 | Ca(ICC2/PI489777)SNP_31330 | 951  | A | G | 92  | 65 | -- | --           |
|            | Ca(ICC2/PI489777)SNP_31331 | 978  | G | A | 102 | 60 | -- | --           |
|            | Ca(ICC2/PI489777)SNP_31332 | 1020 | A | G | 103 | 67 | -- | --           |
| CakTC41085 | Ca(ICC2/PI489777)SNP_31333 | 417  | A | G | 19  | 13 | -- | --           |
| CakTC32224 | Ca(ICC2/PI489777)SNP_31334 | 230  | C | T | 9   | 6  | -- | --           |
|            | Ca(ICC2/PI489777)SNP_31335 | 284  | A | G | 10  | 6  | -- | --           |
|            | Ca(ICC2/PI489777)SNP_31336 | 957  | A | G | 19  | 6  | -- | --           |
|            | Ca(ICC2/PI489777)SNP_31337 | 1076 | T | C | 22  | 6  | -- | --           |
|            | Ca(ICC2/PI489777)SNP_31338 | 1091 | G | A | 23  | 6  | -- | --           |
|            | Ca(ICC2/PI489777)SNP_31339 | 1596 | T | A | 8   | 5  | -- | --           |
| CakTC25840 | Ca(ICC2/PI489777)SNP_31340 | 228  | T | C | 56  | 39 | -- | C2C2-CO-like |
|            | Ca(ICC2/PI489777)SNP_31341 | 523  | C | G | 88  | 34 | -- | C2C2-CO-like |
|            | Ca(ICC2/PI489777)SNP_31342 | 778  | T | C | 110 | 32 | -- | C2C2-CO-like |
|            | Ca(ICC2/PI489777)SNP_31343 | 845  | C | G | 87  | 24 | -- | C2C2-CO-like |
|            | Ca(ICC2/PI489777)SNP_31344 | 1028 | C | T | 73  | 18 | -- | C2C2-CO-like |
|            | Ca(ICC2/PI489777)SNP_31345 | 1306 | T | G | 38  | 15 | -- | C2C2-CO-like |
|            | Ca(ICC2/PI489777)SNP_31346 | 1391 | C | T | 57  | 17 | -- | C2C2-CO-like |
|            | Ca(ICC2/PI489777)SNP_31347 | 1415 | G | A | 46  | 16 | -- | C2C2-CO-like |
|            | Ca(ICC2/PI489777)SNP_31348 | 1519 | G | A | 54  | 14 | -- | C2C2-CO-like |
|            | Ca(ICC2/PI489777)SNP_31349 | 1542 | A | G | 49  | 14 | -- | C2C2-CO-like |
| CakTC36121 | Ca(ICC2/PI489777)SNP_31350 | 1935 | A | C | 15  | 5  | -- | --           |
| CakTC37548 | Ca(ICC2/PI489777)SNP_31351 | 957  | C | A | 16  | 13 | -- | ABI3VP1      |
|            | Ca(ICC2/PI489777)SNP_31352 | 1014 | A | G | 13  | 9  | -- | ABI3VP1      |
|            | Ca(ICC2/PI489777)SNP_31353 | 1107 | C | A | 14  | 6  | -- | ABI3VP1      |
|            | Ca(ICC2/PI489777)SNP_31354 | 1353 | G | A | 10  | 13 | -- | ABI3VP1      |
|            | Ca(ICC2/PI489777)SNP_31355 | 1595 | G | A | 17  | 9  | -- | ABI3VP1      |
| CakTC27802 | Ca(ICC2/PI489777)SNP_31356 | 185  | G | A | 4   | 3  | -- | --           |
|            | Ca(ICC2/PI489777)SNP_31357 | 502  | G | T | 17  | 10 | -- | --           |
|            | Ca(ICC2/PI489777)SNP_31358 | 1741 | T | C | 14  | 9  | -- | --           |
|            | Ca(ICC2/PI489777)SNP_31359 | 2094 | T | G | 23  | 10 | -- | --           |
| CakTC23671 | Ca(ICC2/PI489777)SNP_31360 | 394  | C | T | 39  | 20 | -- | --           |
|            | Ca(ICC2/PI489777)SNP_31361 | 523  | A | G | 47  | 32 | -- | --           |
|            | Ca(ICC2/PI489777)SNP_31362 | 832  | A | G | 48  | 37 | -- | --           |
|            | Ca(ICC2/PI489777)SNP_31363 | 847  | T | C | 48  | 35 | -- | --           |
|            | Ca(ICC2/PI489777)SNP_31364 | 1204 | T | C | 37  | 23 | -- | --           |
|            | Ca(ICC2/PI489777)SNP_31365 | 1215 | A | G | 39  | 23 | -- | --           |
|            | Ca(ICC2/PI489777)SNP_31366 | 1742 | G | C | 17  | 10 | -- | --           |
| CakTC36112 | Ca(ICC2/PI489777)SNP_31367 | 250  | G | A | 15  | 16 | -- | --           |
|            | Ca(ICC2/PI489777)SNP_31368 | 744  | G | A | 11  | 7  | -- | --           |
|            | Ca(ICC2/PI489777)SNP_31369 | 768  | G | T | 12  | 4  | -- | --           |
|            | Ca(ICC2/PI489777)SNP_31370 | 930  | G | A | 12  | 9  | -- | --           |
|            | Ca(ICC2/PI489777)SNP_31371 | 1476 | T | C | 14  | 6  | -- | --           |



|            |                            |      |   |   |    |    |           |      |
|------------|----------------------------|------|---|---|----|----|-----------|------|
|            | Ca(ICC2/PI489777)SNP_31372 | 1903 | A | G | 7  | 7  | --        | --   |
| CakTC29807 | Ca(ICC2/PI489777)SNP_31373 | 926  | T | C | 4  | 8  | --        | --   |
| CakTC24979 | Ca(ICC2/PI489777)SNP_31374 | 967  | G | A | 11 | 14 | Flower    | bud  |
|            | Ca(ICC2/PI489777)SNP_31375 | 1045 | C | G | 11 | 19 | Flower    | bud  |
| CakTC39568 | Ca(ICC2/PI489777)SNP_31376 | 719  | C | T | 11 | 4  | Young_pod | --   |
| CakTC42201 | Ca(ICC2/PI489777)SNP_31377 | 24   | C | G | 5  | 3  | --        | --   |
|            | Ca(ICC2/PI489777)SNP_31378 | 238  | A | T | 11 | 7  | --        | --   |
|            | Ca(ICC2/PI489777)SNP_31379 | 257  | A | G | 12 | 7  | --        | --   |
|            | Ca(ICC2/PI489777)SNP_31380 | 355  | T | C | 13 | 15 | --        | --   |
|            | Ca(ICC2/PI489777)SNP_31381 | 550  | A | G | 7  | 21 | --        | --   |
|            | Ca(ICC2/PI489777)SNP_31382 | 555  | T | A | 6  | 17 | --        | --   |
|            | Ca(ICC2/PI489777)SNP_31383 | 635  | G | T | 8  | 17 | --        | --   |
|            | Ca(ICC2/PI489777)SNP_31384 | 961  | G | A | 12 | 8  | --        | --   |
|            | Ca(ICC2/PI489777)SNP_31385 | 1144 | A | G | 11 | 6  | --        | --   |
|            | Ca(ICC2/PI489777)SNP_31386 | 1171 | T | G | 12 | 11 | --        | --   |
| CakTC30226 | Ca(ICC2/PI489777)SNP_31387 | 479  | G | A | 22 | 6  | --        | --   |
|            | Ca(ICC2/PI489777)SNP_31388 | 550  | C | T | 21 | 5  | --        | --   |
|            | Ca(ICC2/PI489777)SNP_31389 | 1243 | A | G | 11 | 12 | --        | --   |
| CakTC32279 | Ca(ICC2/PI489777)SNP_31390 | 365  | T | C | 8  | 4  | --        | --   |
|            | Ca(ICC2/PI489777)SNP_31391 | 395  | T | G | 8  | 4  | --        | --   |
| CakTC22242 | Ca(ICC2/PI489777)SNP_31392 | 381  | A | G | 18 | 13 | --        | --   |
| CakTC29698 | Ca(ICC2/PI489777)SNP_31393 | 51   | C | T | 9  | 7  | --        | --   |
|            | Ca(ICC2/PI489777)SNP_31394 | 117  | T | A | 9  | 9  | --        | --   |
|            | Ca(ICC2/PI489777)SNP_31395 | 525  | C | T | 4  | 18 | --        | --   |
|            | Ca(ICC2/PI489777)SNP_31396 | 789  | T | C | 12 | 23 | --        | --   |
|            | Ca(ICC2/PI489777)SNP_31397 | 1044 | C | A | 6  | 21 | --        | --   |
|            | Ca(ICC2/PI489777)SNP_31398 | 1116 | T | G | 6  | 17 | --        | --   |
|            | Ca(ICC2/PI489777)SNP_31399 | 1127 | A | G | 5  | 18 | --        | --   |
|            | Ca(ICC2/PI489777)SNP_31400 | 1137 | C | T | 6  | 12 | --        | --   |
|            | Ca(ICC2/PI489777)SNP_31401 | 1181 | C | G | 5  | 7  | --        | --   |
| CakTC14595 | Ca(ICC2/PI489777)SNP_31402 | 93   | G | A | 9  | 4  | --        | --   |
|            | Ca(ICC2/PI489777)SNP_31403 | 280  | T | G | 16 | 10 | --        | --   |
|            | Ca(ICC2/PI489777)SNP_31404 | 1436 | G | A | 20 | 13 | --        | --   |
|            | Ca(ICC2/PI489777)SNP_31405 | 1481 | A | G | 14 | 12 | --        | --   |
|            | Ca(ICC2/PI489777)SNP_31406 | 1487 | G | A | 13 | 12 | --        | --   |
| CakTC40875 | Ca(ICC2/PI489777)SNP_31407 | 268  | C | G | 7  | 3  | --        | --   |
|            | Ca(ICC2/PI489777)SNP_31408 | 277  | C | G | 7  | 3  | --        | --   |
|            | Ca(ICC2/PI489777)SNP_31409 | 402  | G | C | 8  | 4  | --        | --   |
|            | Ca(ICC2/PI489777)SNP_31410 | 620  | T | G | 7  | 5  | --        | --   |
|            | Ca(ICC2/PI489777)SNP_31411 | 1340 | G | C | 8  | 4  | --        | --   |
|            | Ca(ICC2/PI489777)SNP_31412 | 1358 | C | G | 7  | 4  | --        | --   |
|            | Ca(ICC2/PI489777)SNP_31413 | 1566 | A | G | 3  | 4  | --        | --   |
| CakTC25853 | Ca(ICC2/PI489777)SNP_31414 | 638  | C | A | 11 | 9  | --        | --   |
| CakTC28230 | Ca(ICC2/PI489777)SNP_31415 | 352  | T | C | 7  | 3  | --        | --   |
|            | Ca(ICC2/PI489777)SNP_31416 | 442  | C | T | 9  | 3  | --        | --   |
|            | Ca(ICC2/PI489777)SNP_31417 | 1833 | T | C | 3  | 8  | --        | --   |
| CakTC39533 | Ca(ICC2/PI489777)SNP_31418 | 453  | C | T | 11 | 14 | Root      | --   |
|            | Ca(ICC2/PI489777)SNP_31419 | 468  | C | G | 10 | 15 | Root      | --   |
|            | Ca(ICC2/PI489777)SNP_31420 | 699  | A | T | 15 | 16 | Root      | --   |
|            | Ca(ICC2/PI489777)SNP_31421 | 705  | C | T | 16 | 15 | Root      | --   |
|            | Ca(ICC2/PI489777)SNP_31422 | 1224 | T | A | 8  | 15 | Root      | --   |
|            | Ca(ICC2/PI489777)SNP_31423 | 1301 | T | G | 7  | 8  | Root      | --   |
| CakTC08324 | Ca(ICC2/PI489777)SNP_31424 | 239  | C | T | 31 | 19 | --        | --   |
|            | Ca(ICC2/PI489777)SNP_31425 | 347  | A | G | 35 | 22 | --        | --   |
| CakTC16188 | Ca(ICC2/PI489777)SNP_31426 | 1782 | G | A | 22 | 3  | --        | bHLH |
|            | Ca(ICC2/PI489777)SNP_31427 | 2323 | T | C | 16 | 4  | --        | bHLH |
| CakTC01756 | Ca(ICC2/PI489777)SNP_31428 | 120  | A | G | 14 | 4  | --        | --   |
|            | Ca(ICC2/PI489777)SNP_31429 | 1549 | C | T | 30 | 13 | --        | --   |
| CakTC38718 | Ca(ICC2/PI489777)SNP_31430 | 438  | C | G | 3  | 5  | --        | --   |
|            | Ca(ICC2/PI489777)SNP_31431 | 624  | T | C | 3  | 7  | --        | --   |
| CakTC39444 | Ca(ICC2/PI489777)SNP_31432 | 886  | A | G | 16 | 9  | --        | TPR  |
| CakTC40928 | Ca(ICC2/PI489777)SNP_31433 | 343  | T | G | 6  | 5  | --        | --   |
|            | Ca(ICC2/PI489777)SNP_31434 | 3518 | C | T | 3  | 3  | --        | --   |
| CakTC43270 | Ca(ICC2/PI489777)SNP_31435 | 481  | A | G | 10 | 11 | --        | --   |
|            | Ca(ICC2/PI489777)SNP_31436 | 855  | A | G | 4  | 3  | --        | --   |
| CakTC30324 | Ca(ICC2/PI489777)SNP_31437 | 996  | A | T | 6  | 3  | --        | --   |
|            | Ca(ICC2/PI489777)SNP_31438 | 1233 | A | G | 6  | 4  | --        | --   |
|            | Ca(ICC2/PI489777)SNP_31439 | 1371 | A | G | 6  | 3  | --        | --   |
| CakTC30535 | Ca(ICC2/PI489777)SNP_31440 | 165  | C | G | 38 | 7  | --        | --   |
|            | Ca(ICC2/PI489777)SNP_31441 | 279  | T | C | 51 | 13 | --        | --   |
|            | Ca(ICC2/PI489777)SNP_31442 | 289  | T | A | 49 | 11 | --        | --   |
|            | Ca(ICC2/PI489777)SNP_31443 | 411  | C | A | 55 | 24 | --        | --   |
|            | Ca(ICC2/PI489777)SNP_31444 | 552  | A | G | 42 | 24 | --        | --   |
|            | Ca(ICC2/PI489777)SNP_31445 | 1011 | G | A | 67 | 15 | --        | --   |

|            |                            |      |   |   |     |    |           |         |
|------------|----------------------------|------|---|---|-----|----|-----------|---------|
|            | Ca(ICC2/PI489777)SNP_31446 | 1024 | C | A | 65  | 15 | --        | --      |
|            | Ca(ICC2/PI489777)SNP_31447 | 1212 | G | A | 38  | 8  | --        | --      |
| CakTC42004 | Ca(ICC2/PI489777)SNP_31448 | 1383 | T | C | 33  | 20 | --        | --      |
| CakTC28785 | Ca(ICC2/PI489777)SNP_31449 | 2165 | C | T | 16  | 6  | --        | --      |
|            | Ca(ICC2/PI489777)SNP_31450 | 2382 | C | A | 9   | 4  | --        | --      |
|            | Ca(ICC2/PI489777)SNP_31451 | 2454 | A | G | 6   | 3  | --        | --      |
|            | Ca(ICC2/PI489777)SNP_31452 | 2541 | A | G | 7   | 5  | --        | --      |
|            | Ca(ICC2/PI489777)SNP_31453 | 2558 | A | G | 4   | 5  | --        | --      |
|            | Ca(ICC2/PI489777)SNP_31454 | 2559 | A | G | 4   | 5  | --        | --      |
|            | Ca(ICC2/PI489777)SNP_31455 | 2752 | C | T | 5   | 4  | --        | --      |
|            | Ca(ICC2/PI489777)SNP_31456 | 2837 | C | T | 7   | 3  | --        | --      |
| CakTC37983 | Ca(ICC2/PI489777)SNP_31457 | 283  | C | T | 10  | 4  | --        | SRS     |
|            | Ca(ICC2/PI489777)SNP_31458 | 470  | G | C | 12  | 3  | --        | SRS     |
|            | Ca(ICC2/PI489777)SNP_31459 | 1221 | A | T | 12  | 10 | --        | SRS     |
| CakTC26574 | Ca(ICC2/PI489777)SNP_31460 | 343  | G | A | 13  | 9  | --        | --      |
|            | Ca(ICC2/PI489777)SNP_31461 | 1561 | C | A | 19  | 13 | --        | --      |
| CakTC09604 | Ca(ICC2/PI489777)SNP_31462 | 4089 | T | C | 4   | 4  | --        | --      |
| CakTC27608 | Ca(ICC2/PI489777)SNP_31463 | 441  | C | T | 150 | 97 | --        | --      |
|            | Ca(ICC2/PI489777)SNP_31464 | 480  | C | T | 142 | 89 | --        | --      |
|            | Ca(ICC2/PI489777)SNP_31465 | 585  | A | G | 145 | 79 | --        | --      |
| CakTC40198 | Ca(ICC2/PI489777)SNP_31466 | 1181 | A | G | 4   | 3  | --        | --      |
| CakTC23644 | Ca(ICC2/PI489777)SNP_31467 | 479  | G | T | 14  | 4  | --        | --      |
|            | Ca(ICC2/PI489777)SNP_31468 | 2461 | C | T | 23  | 9  | --        | --      |
|            | Ca(ICC2/PI489777)SNP_31469 | 3239 | G | C | 7   | 17 | --        | --      |
|            | Ca(ICC2/PI489777)SNP_31470 | 3687 | C | T | 18  | 10 | --        | --      |
|            | Ca(ICC2/PI489777)SNP_31471 | 3877 | C | T | 18  | 8  | --        | --      |
|            | Ca(ICC2/PI489777)SNP_31472 | 4535 | A | G | 4   | 3  | --        | --      |
| CakTC43094 | Ca(ICC2/PI489777)SNP_31473 | 330  | C | T | 3   | 3  | Young_pod | --      |
|            | Ca(ICC2/PI489777)SNP_31474 | 552  | G | C | 6   | 16 | Young_pod | --      |
|            | Ca(ICC2/PI489777)SNP_31475 | 651  | A | T | 3   | 16 | Young_pod | --      |
| CakTC29864 | Ca(ICC2/PI489777)SNP_31476 | 1717 | G | A | 42  | 14 | --        | --      |
| CakTC04726 | Ca(ICC2/PI489777)SNP_31477 | 2352 | A | G | 3   | 4  | --        | --      |
| CakTC27744 | Ca(ICC2/PI489777)SNP_31478 | 413  | G | A | 3   | 3  | --        | --      |
|            | Ca(ICC2/PI489777)SNP_31479 | 419  | G | A | 3   | 3  | --        | --      |
|            | Ca(ICC2/PI489777)SNP_31480 | 459  | G | A | 3   | 3  | --        | --      |
| CakTC38681 | Ca(ICC2/PI489777)SNP_31481 | 350  | C | T | 122 | 42 | --        | --      |
|            | Ca(ICC2/PI489777)SNP_31482 | 364  | G | A | 111 | 47 | --        | --      |
| CakTC37992 | Ca(ICC2/PI489777)SNP_31483 | 548  | C | G | 9   | 8  | --        | AUX/IAA |
|            | Ca(ICC2/PI489777)SNP_31484 | 656  | G | C | 10  | 4  | --        | AUX/IAA |
|            | Ca(ICC2/PI489777)SNP_31485 | 700  | G | A | 10  | 6  | --        | AUX/IAA |
|            | Ca(ICC2/PI489777)SNP_31486 | 806  | A | G | 14  | 6  | --        | AUX/IAA |
|            | Ca(ICC2/PI489777)SNP_31487 | 891  | A | G | 11  | 9  | --        | AUX/IAA |
| CakTC29351 | Ca(ICC2/PI489777)SNP_31488 | 629  | A | T | 58  | 47 | --        | --      |
|            | Ca(ICC2/PI489777)SNP_31489 | 907  | G | A | 20  | 21 | --        | --      |
|            | Ca(ICC2/PI489777)SNP_31490 | 993  | G | A | 17  | 13 | --        | --      |
|            | Ca(ICC2/PI489777)SNP_31491 | 1004 | T | A | 17  | 13 | --        | --      |
| CakTC23503 | Ca(ICC2/PI489777)SNP_31492 | 109  | C | A | 20  | 7  | --        | --      |
| CakTC39895 | Ca(ICC2/PI489777)SNP_31493 | 1016 | A | G | 15  | 34 | --        | --      |
| CakTC35237 | Ca(ICC2/PI489777)SNP_31494 | 594  | A | C | 3   | 9  | --        | --      |
| CakTC35223 | Ca(ICC2/PI489777)SNP_31495 | 132  | A | G | 5   | 3  | Flower    | bud     |
|            | Ca(ICC2/PI489777)SNP_31496 | 512  | G | A | 4   | 3  | Flower    | bud     |
|            | Ca(ICC2/PI489777)SNP_31497 | 1280 | C | T | 9   | 8  | Flower    | bud     |
|            | Ca(ICC2/PI489777)SNP_31498 | 1281 | A | G | 10  | 12 | Flower    | bud     |
|            | Ca(ICC2/PI489777)SNP_31499 | 1373 | T | C | 11  | 12 | Flower    | bud     |
|            | Ca(ICC2/PI489777)SNP_31500 | 2109 | T | C | 7   | 3  | Flower    | bud     |
|            | Ca(ICC2/PI489777)SNP_31501 | 2223 | A | G | 10  | 3  | Flower    | bud     |
| CakTC09866 | Ca(ICC2/PI489777)SNP_31502 | 1183 | G | A | 13  | 7  | --        | --      |
|            | Ca(ICC2/PI489777)SNP_31503 | 2457 | T | G | 31  | 16 | --        | --      |
|            | Ca(ICC2/PI489777)SNP_31504 | 2741 | A | G | 13  | 7  | --        | --      |
| CakTC25770 | Ca(ICC2/PI489777)SNP_31505 | 441  | T | C | 13  | 3  | --        | --      |
|            | Ca(ICC2/PI489777)SNP_31506 | 1302 | C | A | 56  | 25 | --        | --      |
|            | Ca(ICC2/PI489777)SNP_31507 | 1775 | C | T | 29  | 15 | --        | --      |
|            | Ca(ICC2/PI489777)SNP_31508 | 1881 | C | T | 30  | 11 | --        | --      |
| CakTC31851 | Ca(ICC2/PI489777)SNP_31509 | 65   | G | T | 3   | 3  | Young_pod | --      |
|            | Ca(ICC2/PI489777)SNP_31510 | 167  | G | A | 3   | 4  | Young_pod | --      |
| CakTC40301 | Ca(ICC2/PI489777)SNP_31511 | 200  | T | C | 10  | 17 | --        | --      |
|            | Ca(ICC2/PI489777)SNP_31512 | 292  | C | T | 12  | 25 | --        | --      |
| CakTC42066 | Ca(ICC2/PI489777)SNP_31513 | 1727 | G | T | 27  | 31 | --        | --      |
| CakTC11730 | Ca(ICC2/PI489777)SNP_31514 | 449  | A | G | 4   | 4  | --        | --      |
|            | Ca(ICC2/PI489777)SNP_31515 | 497  | G | A | 3   | 3  | --        | --      |
| CakTC36539 | Ca(ICC2/PI489777)SNP_31516 | 450  | G | T | 5   | 4  | --        | --      |
|            | Ca(ICC2/PI489777)SNP_31517 | 1225 | A | G | 4   | 8  | --        | --      |
| CakTC30410 | Ca(ICC2/PI489777)SNP_31518 | 730  | T | A | 14  | 4  | --        | --      |
|            | Ca(ICC2/PI489777)SNP_31519 | 889  | T | C | 19  | 5  | --        | --      |

|            |                            |      |   |   |    |    |           |       |
|------------|----------------------------|------|---|---|----|----|-----------|-------|
|            | Ca(ICC2/PI489777)SNP_31520 | 1486 | T | G | 9  | 4  | --        | --    |
|            | Ca(ICC2/PI489777)SNP_31521 | 1603 | G | A | 3  | 4  | --        | --    |
| CakTC12396 | Ca(ICC2/PI489777)SNP_31522 | 261  | T | A | 3  | 3  | --        | --    |
|            | Ca(ICC2/PI489777)SNP_31523 | 264  | T | C | 4  | 3  | --        | --    |
|            | Ca(ICC2/PI489777)SNP_31524 | 280  | C | A | 3  | 3  | --        | --    |
|            | Ca(ICC2/PI489777)SNP_31525 | 293  | C | A | 4  | 3  | --        | --    |
|            | Ca(ICC2/PI489777)SNP_31526 | 339  | T | A | 6  | 3  | --        | --    |
|            | Ca(ICC2/PI489777)SNP_31527 | 349  | A | T | 5  | 3  | --        | --    |
|            | Ca(ICC2/PI489777)SNP_31528 | 350  | A | G | 5  | 3  | --        | --    |
|            | Ca(ICC2/PI489777)SNP_31529 | 405  | C | A | 5  | 3  | --        | --    |
|            | Ca(ICC2/PI489777)SNP_31530 | 458  | G | A | 3  | 3  | --        | --    |
|            | Ca(ICC2/PI489777)SNP_31531 | 471  | T | G | 3  | 3  | --        | --    |
| CakTC24820 | Ca(ICC2/PI489777)SNP_31532 | 513  | C | A | 12 | 4  | Young_pod | --    |
|            | Ca(ICC2/PI489777)SNP_31533 | 521  | T | A | 12 | 4  | Young_pod | --    |
|            | Ca(ICC2/PI489777)SNP_31534 | 862  | C | T | 11 | 3  | Young_pod | --    |
|            | Ca(ICC2/PI489777)SNP_31535 | 955  | G | A | 10 | 3  | Young_pod | --    |
| CakTC37100 | Ca(ICC2/PI489777)SNP_31536 | 53   | G | A | 6  | 3  | Shoot     | --    |
|            | Ca(ICC2/PI489777)SNP_31537 | 355  | G | A | 14 | 3  | Shoot     | --    |
| CakTC41183 | Ca(ICC2/PI489777)SNP_31538 | 294  | A | G | 8  | 4  | --        | --    |
|            | Ca(ICC2/PI489777)SNP_31539 | 297  | C | T | 10 | 4  | --        | --    |
|            | Ca(ICC2/PI489777)SNP_31540 | 319  | G | C | 12 | 4  | --        | --    |
|            | Ca(ICC2/PI489777)SNP_31541 | 328  | G | A | 12 | 4  | --        | --    |
|            | Ca(ICC2/PI489777)SNP_31542 | 374  | C | G | 12 | 4  | --        | --    |
|            | Ca(ICC2/PI489777)SNP_31543 | 387  | A | G | 12 | 4  | --        | --    |
| CakTC39513 | Ca(ICC2/PI489777)SNP_31544 | 379  | A | G | 4  | 3  | --        | --    |
|            | Ca(ICC2/PI489777)SNP_31545 | 540  | G | A | 6  | 8  | --        | --    |
|            | Ca(ICC2/PI489777)SNP_31546 | 618  | G | A | 5  | 7  | --        | --    |
|            | Ca(ICC2/PI489777)SNP_31547 | 801  | A | G | 9  | 6  | --        | --    |
|            | Ca(ICC2/PI489777)SNP_31548 | 1338 | A | G | 3  | 7  | --        | --    |
|            | Ca(ICC2/PI489777)SNP_31549 | 1391 | T | A | 3  | 7  | --        | --    |
| CakTC39868 | Ca(ICC2/PI489777)SNP_31550 | 960  | T | C | 19 | 7  | --        | --    |
|            | Ca(ICC2/PI489777)SNP_31551 | 1337 | C | T | 7  | 4  | --        | --    |
| CakTC26581 | Ca(ICC2/PI489777)SNP_31552 | 728  | A | T | 11 | 11 | --        | --    |
|            | Ca(ICC2/PI489777)SNP_31553 | 926  | A | G | 10 | 10 | --        | --    |
|            | Ca(ICC2/PI489777)SNP_31554 | 1020 | A | G | 11 | 9  | --        | --    |
|            | Ca(ICC2/PI489777)SNP_31555 | 1255 | C | T | 9  | 7  | --        | --    |
|            | Ca(ICC2/PI489777)SNP_31556 | 1280 | A | C | 9  | 7  | --        | --    |
|            | Ca(ICC2/PI489777)SNP_31557 | 1293 | T | A | 8  | 7  | --        | --    |
|            | Ca(ICC2/PI489777)SNP_31558 | 1365 | C | T | 4  | 6  | --        | --    |
|            | Ca(ICC2/PI489777)SNP_31559 | 1413 | C | T | 5  | 6  | --        | --    |
|            | Ca(ICC2/PI489777)SNP_31560 | 1422 | G | A | 7  | 6  | --        | --    |
| CakTC42906 | Ca(ICC2/PI489777)SNP_31561 | 652  | G | A | 11 | 6  | --        | --    |
|            | Ca(ICC2/PI489777)SNP_31562 | 700  | G | A | 12 | 4  | --        | --    |
|            | Ca(ICC2/PI489777)SNP_31563 | 748  | C | T | 11 | 4  | --        | --    |
|            | Ca(ICC2/PI489777)SNP_31564 | 791  | T | A | 11 | 3  | --        | --    |
|            | Ca(ICC2/PI489777)SNP_31565 | 842  | A | G | 11 | 3  | --        | --    |
| CakTC31090 | Ca(ICC2/PI489777)SNP_31566 | 262  | C | A | 4  | 8  | --        | --    |
|            | Ca(ICC2/PI489777)SNP_31567 | 294  | G | T | 5  | 8  | --        | --    |
| CakTC37400 | Ca(ICC2/PI489777)SNP_31568 | 640  | C | T | 34 | 26 | --        | --    |
|            | Ca(ICC2/PI489777)SNP_31569 | 813  | T | C | 32 | 44 | --        | --    |
| CakTC31653 | Ca(ICC2/PI489777)SNP_31570 | 180  | T | C | 9  | 4  | --        | --    |
|            | Ca(ICC2/PI489777)SNP_31571 | 363  | G | A | 5  | 9  | --        | --    |
|            | Ca(ICC2/PI489777)SNP_31572 | 390  | G | A | 7  | 9  | --        | --    |
| CakTC26975 | Ca(ICC2/PI489777)SNP_31573 | 2998 | G | A | 5  | 3  | --        | --    |
| CakTC43225 | Ca(ICC2/PI489777)SNP_31574 | 225  | G | C | 10 | 9  | --        | --    |
| CakTC37585 | Ca(ICC2/PI489777)SNP_31575 | 685  | C | G | 18 | 4  | --        | BSD   |
|            | Ca(ICC2/PI489777)SNP_31576 | 863  | A | G | 20 | 7  | --        | BSD   |
|            | Ca(ICC2/PI489777)SNP_31577 | 981  | G | C | 23 | 10 | --        | BSD   |
|            | Ca(ICC2/PI489777)SNP_31578 | 1037 | G | A | 17 | 11 | --        | BSD   |
|            | Ca(ICC2/PI489777)SNP_31579 | 1040 | T | C | 18 | 12 | --        | BSD   |
|            | Ca(ICC2/PI489777)SNP_31580 | 1057 | A | T | 19 | 12 | --        | BSD   |
|            | Ca(ICC2/PI489777)SNP_31581 | 1070 | C | G | 21 | 9  | --        | BSD   |
|            | Ca(ICC2/PI489777)SNP_31582 | 1147 | T | G | 14 | 11 | --        | BSD   |
|            | Ca(ICC2/PI489777)SNP_31583 | 1443 | A | G | 7  | 3  | --        | BSD   |
| CakTC09200 | Ca(ICC2/PI489777)SNP_31584 | 433  | C | T | 3  | 3  | --        | --    |
|            | Ca(ICC2/PI489777)SNP_31585 | 1158 | G | A | 4  | 8  | --        | --    |
|            | Ca(ICC2/PI489777)SNP_31586 | 1172 | A | G | 3  | 9  | --        | --    |
| CakTC29749 | Ca(ICC2/PI489777)SNP_31587 | 179  | T | C | 15 | 10 | --        | --    |
| CakTC41936 | Ca(ICC2/PI489777)SNP_31588 | 10   | C | A | 4  | 3  | --        | --    |
|            | Ca(ICC2/PI489777)SNP_31589 | 212  | G | A | 12 | 9  | --        | --    |
|            | Ca(ICC2/PI489777)SNP_31590 | 220  | G | A | 12 | 10 | --        | --    |
| CakTC32489 | Ca(ICC2/PI489777)SNP_31591 | 187  | C | A | 4  | 9  | --        | ARR-B |
| CakTC33555 | Ca(ICC2/PI489777)SNP_31592 | 90   | T | C | 8  | 5  | --        | --    |
|            | Ca(ICC2/PI489777)SNP_31593 | 517  | A | T | 8  | 4  | --        | --    |

|            |                            |      |   |   |    |    |           |          |
|------------|----------------------------|------|---|---|----|----|-----------|----------|
| CakTC40620 | Ca(ICC2/PI489777)SNP_31594 | 15   | A | G | 11 | 4  | --        | --       |
|            | Ca(ICC2/PI489777)SNP_31595 | 464  | C | T | 11 | 9  | --        | --       |
| CakTC30272 | Ca(ICC2/PI489777)SNP_31596 | 1319 | A | C | 7  | 3  | --        | --       |
| CakTC40871 | Ca(ICC2/PI489777)SNP_31597 | 305  | T | C | 13 | 14 | --        | --       |
|            | Ca(ICC2/PI489777)SNP_31598 | 329  | G | C | 13 | 17 | --        | --       |
|            | Ca(ICC2/PI489777)SNP_31599 | 431  | T | C | 20 | 12 | --        | --       |
|            | Ca(ICC2/PI489777)SNP_31600 | 452  | C | T | 22 | 14 | --        | --       |
|            | Ca(ICC2/PI489777)SNP_31601 | 497  | A | G | 23 | 11 | --        | --       |
|            | Ca(ICC2/PI489777)SNP_31602 | 845  | G | C | 25 | 13 | --        | --       |
|            | Ca(ICC2/PI489777)SNP_31603 | 897  | G | A | 22 | 18 | --        | --       |
|            | Ca(ICC2/PI489777)SNP_31604 | 1370 | G | C | 11 | 23 | --        | --       |
|            | Ca(ICC2/PI489777)SNP_31605 | 1520 | C | T | 10 | 22 | --        | --       |
| CakTC28205 | Ca(ICC2/PI489777)SNP_31606 | 620  | G | A | 24 | 15 | --        | --       |
|            | Ca(ICC2/PI489777)SNP_31607 | 1322 | A | T | 14 | 8  | --        | --       |
|            | Ca(ICC2/PI489777)SNP_31608 | 1643 | T | C | 17 | 8  | --        | --       |
|            | Ca(ICC2/PI489777)SNP_31609 | 1768 | G | A | 13 | 4  | --        | --       |
| CakTC11811 | Ca(ICC2/PI489777)SNP_31610 | 616  | C | T | 9  | 3  | --        | --       |
| CakTC37920 | Ca(ICC2/PI489777)SNP_31611 | 952  | G | A | 5  | 4  | --        | --       |
| CakTC28649 | Ca(ICC2/PI489777)SNP_31612 | 759  | A | G | 88 | 41 | --        | --       |
| CakTC14534 | Ca(ICC2/PI489777)SNP_31613 | 914  | A | G | 3  | 3  | --        | --       |
| CakTC25929 | Ca(ICC2/PI489777)SNP_31614 | 431  | C | T | 9  | 4  | --        | FAR1     |
|            | Ca(ICC2/PI489777)SNP_31615 | 947  | A | T | 4  | 3  | --        | FAR1     |
| CakTC41599 | Ca(ICC2/PI489777)SNP_31616 | 1364 | T | C | 22 | 17 | --        | --       |
|            | Ca(ICC2/PI489777)SNP_31617 | 1986 | G | A | 10 | 11 | --        | --       |
|            | Ca(ICC2/PI489777)SNP_31618 | 2043 | C | G | 9  | 13 | --        | --       |
| CakTC42257 | Ca(ICC2/PI489777)SNP_31619 | 1445 | G | A | 15 | 8  | --        | --       |
| CakTC28477 | Ca(ICC2/PI489777)SNP_31620 | 269  | G | A | 6  | 17 | --        | --       |
|            | Ca(ICC2/PI489777)SNP_31621 | 608  | C | T | 11 | 10 | --        | --       |
|            | Ca(ICC2/PI489777)SNP_31622 | 984  | C | G | 9  | 5  | --        | --       |
|            | Ca(ICC2/PI489777)SNP_31623 | 1109 | G | A | 10 | 4  | --        | --       |
|            | Ca(ICC2/PI489777)SNP_31624 | 1611 | C | G | 6  | 5  | --        | --       |
|            | Ca(ICC2/PI489777)SNP_31625 | 1682 | T | C | 4  | 5  | --        | --       |
| CakTC39117 | Ca(ICC2/PI489777)SNP_31626 | 931  | C | T | 45 | 28 | --        | --       |
|            | Ca(ICC2/PI489777)SNP_31627 | 1572 | G | T | 7  | 16 | --        | --       |
| CakTC38405 | Ca(ICC2/PI489777)SNP_31628 | 440  | C | T | 21 | 16 | --        | --       |
|            | Ca(ICC2/PI489777)SNP_31629 | 581  | T | C | 27 | 6  | --        | --       |
|            | Ca(ICC2/PI489777)SNP_31630 | 648  | C | A | 21 | 7  | --        | --       |
| CakTC12520 | Ca(ICC2/PI489777)SNP_31631 | 154  | C | A | 7  | 4  | --        | --       |
|            | Ca(ICC2/PI489777)SNP_31632 | 354  | G | A | 23 | 10 | --        | --       |
|            | Ca(ICC2/PI489777)SNP_31633 | 1293 | T | C | 7  | 14 | --        | --       |
|            | Ca(ICC2/PI489777)SNP_31634 | 1782 | C | T | 7  | 5  | --        | --       |
|            | Ca(ICC2/PI489777)SNP_31635 | 1926 | T | A | 17 | 6  | --        | --       |
|            | Ca(ICC2/PI489777)SNP_31636 | 4083 | T | C | 22 | 13 | --        | --       |
|            | Ca(ICC2/PI489777)SNP_31637 | 5036 | G | C | 21 | 21 | --        | --       |
|            | Ca(ICC2/PI489777)SNP_31638 | 5102 | A | G | 15 | 19 | --        | --       |
| CakTC41854 | Ca(ICC2/PI489777)SNP_31639 | 92   | T | C | 7  | 4  | --        | --       |
|            | Ca(ICC2/PI489777)SNP_31640 | 240  | G | A | 24 | 7  | --        | --       |
|            | Ca(ICC2/PI489777)SNP_31641 | 913  | A | G | 13 | 17 | --        | --       |
| CakTC26823 | Ca(ICC2/PI489777)SNP_31642 | 531  | A | G | 10 | 7  | --        | --       |
|            | Ca(ICC2/PI489777)SNP_31643 | 556  | C | A | 10 | 7  | --        | --       |
|            | Ca(ICC2/PI489777)SNP_31644 | 591  | T | A | 3  | 6  | --        | --       |
|            | Ca(ICC2/PI489777)SNP_31645 | 615  | G | C | 3  | 6  | --        | --       |
|            | Ca(ICC2/PI489777)SNP_31646 | 638  | C | G | 4  | 6  | --        | --       |
|            | Ca(ICC2/PI489777)SNP_31647 | 649  | G | A | 4  | 6  | --        | --       |
|            | Ca(ICC2/PI489777)SNP_31648 | 680  | G | C | 3  | 6  | --        | --       |
| CakTC34325 | Ca(ICC2/PI489777)SNP_31649 | 175  | C | T | 9  | 17 | --        | --       |
|            | Ca(ICC2/PI489777)SNP_31650 | 182  | G | T | 9  | 17 | --        | --       |
|            | Ca(ICC2/PI489777)SNP_31651 | 479  | A | T | 21 | 19 | --        | --       |
|            | Ca(ICC2/PI489777)SNP_31652 | 731  | T | C | 19 | 13 | --        | --       |
|            | Ca(ICC2/PI489777)SNP_31653 | 887  | A | T | 15 | 20 | --        | --       |
|            | Ca(ICC2/PI489777)SNP_31654 | 950  | T | C | 18 | 23 | --        | --       |
|            | Ca(ICC2/PI489777)SNP_31655 | 1792 | G | A | 13 | 22 | --        | --       |
|            | Ca(ICC2/PI489777)SNP_31656 | 1817 | T | C | 14 | 24 | --        | --       |
|            | Ca(ICC2/PI489777)SNP_31657 | 1889 | A | G | 14 | 23 | --        | --       |
|            | Ca(ICC2/PI489777)SNP_31658 | 2453 | T | C | 17 | 15 | --        | --       |
|            | Ca(ICC2/PI489777)SNP_31659 | 2616 | T | C | 8  | 21 | --        | --       |
| CakTC23885 | Ca(ICC2/PI489777)SNP_31660 | 1837 | C | T | 10 | 9  | --        | --       |
| CakTC30600 | Ca(ICC2/PI489777)SNP_31661 | 435  | T | C | 3  | 3  | Young_pod | C2C2-Dof |
| CakTC24631 | Ca(ICC2/PI489777)SNP_31662 | 1152 | T | A | 13 | 3  | --        | --       |
|            | Ca(ICC2/PI489777)SNP_31663 | 1419 | G | A | 3  | 3  | --        | --       |
| CakTC42305 | Ca(ICC2/PI489777)SNP_31664 | 649  | A | G | 31 | 28 | --        | --       |
| CakTC42923 | Ca(ICC2/PI489777)SNP_31665 | 151  | C | T | 13 | 3  | --        | --       |
|            | Ca(ICC2/PI489777)SNP_31666 | 279  | C | T | 30 | 3  | --        | --       |
|            | Ca(ICC2/PI489777)SNP_31667 | 379  | A | C | 25 | 3  | --        | --       |

|            |                             |      |   |   |     |     |      |           |
|------------|-----------------------------|------|---|---|-----|-----|------|-----------|
| CakTC23657 | Ca(ICCV2/PI489777)SNP_31668 | 948  | T | G | 7   | 17  | --   | --        |
|            | Ca(ICCV2/PI489777)SNP_31669 | 999  | T | C | 12  | 22  | --   | --        |
|            | Ca(ICCV2/PI489777)SNP_31670 | 1486 | C | G | 21  | 28  | --   | --        |
|            | Ca(ICCV2/PI489777)SNP_31671 | 1734 | T | C | 18  | 24  | --   | --        |
|            | Ca(ICCV2/PI489777)SNP_31672 | 1879 | G | A | 15  | 20  | --   | --        |
|            | Ca(ICCV2/PI489777)SNP_31673 | 2071 | A | G | 12  | 20  | --   | --        |
| CakTC40644 | Ca(ICCV2/PI489777)SNP_31674 | 138  | T | C | 18  | 10  | --   | --        |
|            | Ca(ICCV2/PI489777)SNP_31675 | 303  | C | G | 21  | 9   | --   | --        |
|            | Ca(ICCV2/PI489777)SNP_31676 | 629  | C | G | 5   | 11  | --   | --        |
| CakTC38767 | Ca(ICCV2/PI489777)SNP_31677 | 863  | T | G | 20  | 15  | --   | --        |
|            | Ca(ICCV2/PI489777)SNP_31678 | 1004 | C | T | 13  | 3   | --   | --        |
| CakTC43141 | Ca(ICCV2/PI489777)SNP_31679 | 372  | A | G | 14  | 6   | --   | --        |
|            | Ca(ICCV2/PI489777)SNP_31680 | 435  | T | C | 15  | 7   | --   | --        |
|            | Ca(ICCV2/PI489777)SNP_31681 | 505  | A | G | 20  | 7   | --   | --        |
| CakTC32661 | Ca(ICCV2/PI489777)SNP_31682 | 90   | G | C | 27  | 25  | --   | --        |
| CakTC10949 | Ca(ICCV2/PI489777)SNP_31683 | 815  | G | A | 80  | 44  | --   | --        |
| CakTC23619 | Ca(ICCV2/PI489777)SNP_31684 | 404  | C | T | 23  | 8   | --   | --        |
| CakTC29257 | Ca(ICCV2/PI489777)SNP_31685 | 179  | T | A | 12  | 5   | --   | G2-like   |
|            | Ca(ICCV2/PI489777)SNP_31686 | 489  | T | C | 9   | 6   | --   | G2-like   |
|            | Ca(ICCV2/PI489777)SNP_31687 | 631  | A | C | 10  | 8   | --   | G2-like   |
|            | Ca(ICCV2/PI489777)SNP_31688 | 720  | C | T | 7   | 15  | --   | G2-like   |
|            | Ca(ICCV2/PI489777)SNP_31689 | 1511 | G | A | 26  | 3   | --   | G2-like   |
|            | Ca(ICCV2/PI489777)SNP_31690 | 1632 | C | T | 29  | 3   | --   | G2-like   |
|            | Ca(ICCV2/PI489777)SNP_31691 | 1876 | A | G | 26  | 8   | --   | G2-like   |
|            | Ca(ICCV2/PI489777)SNP_31692 | 1882 | T | C | 24  | 7   | --   | G2-like   |
|            | Ca(ICCV2/PI489777)SNP_31693 | 1998 | C | A | 20  | 9   | --   | G2-like   |
| CakTC38022 | Ca(ICCV2/PI489777)SNP_31694 | 123  | T | C | 25  | 13  | --   | --        |
| CakTC35917 | Ca(ICCV2/PI489777)SNP_31695 | 335  | C | T | 3   | 5   | --   | --        |
| CakTC39613 | Ca(ICCV2/PI489777)SNP_31696 | 126  | C | T | 18  | 6   | --   | --        |
|            | Ca(ICCV2/PI489777)SNP_31697 | 258  | C | T | 24  | 10  | --   | --        |
|            | Ca(ICCV2/PI489777)SNP_31698 | 660  | A | C | 6   | 7   | --   | --        |
|            | Ca(ICCV2/PI489777)SNP_31699 | 834  | A | G | 10  | 7   | --   | --        |
| CakTC25671 | Ca(ICCV2/PI489777)SNP_31700 | 116  | C | T | 7   | 5   | --   | --        |
|            | Ca(ICCV2/PI489777)SNP_31701 | 338  | G | A | 23  | 15  | --   | --        |
|            | Ca(ICCV2/PI489777)SNP_31702 | 353  | C | T | 23  | 15  | --   | --        |
|            | Ca(ICCV2/PI489777)SNP_31703 | 445  | T | G | 29  | 17  | --   | --        |
|            | Ca(ICCV2/PI489777)SNP_31704 | 785  | G | A | 18  | 14  | --   | --        |
|            | Ca(ICCV2/PI489777)SNP_31705 | 836  | C | A | 15  | 15  | --   | --        |
|            | Ca(ICCV2/PI489777)SNP_31706 | 983  | T | G | 3   | 7   | --   | --        |
| CakTC40191 | Ca(ICCV2/PI489777)SNP_31707 | 938  | G | A | 5   | 3   | --   | --        |
| CakTC38410 | Ca(ICCV2/PI489777)SNP_31708 | 679  | C | T | 6   | 4   | --   | --        |
| CakTC37757 | Ca(ICCV2/PI489777)SNP_31709 | 109  | C | A | 3   | 5   | --   | AP2-EREBP |
|            | Ca(ICCV2/PI489777)SNP_31710 | 236  | T | C | 3   | 6   | --   | AP2-EREBP |
|            | Ca(ICCV2/PI489777)SNP_31711 | 695  | C | T | 5   | 6   | --   | AP2-EREBP |
|            | Ca(ICCV2/PI489777)SNP_31712 | 730  | A | G | 4   | 6   | --   | AP2-EREBP |
|            | Ca(ICCV2/PI489777)SNP_31713 | 738  | A | G | 3   | 5   | --   | AP2-EREBP |
|            | Ca(ICCV2/PI489777)SNP_31714 | 747  | T | C | 4   | 5   | --   | AP2-EREBP |
| CakTC26710 | Ca(ICCV2/PI489777)SNP_31715 | 345  | C | G | 21  | 14  | --   | --        |
|            | Ca(ICCV2/PI489777)SNP_31716 | 798  | A | G | 11  | 12  | --   | --        |
|            | Ca(ICCV2/PI489777)SNP_31717 | 1221 | A | G | 23  | 17  | --   | --        |
|            | Ca(ICCV2/PI489777)SNP_31718 | 2095 | G | T | 9   | 10  | --   | --        |
|            | Ca(ICCV2/PI489777)SNP_31719 | 2116 | G | A | 8   | 9   | --   | --        |
|            | Ca(ICCV2/PI489777)SNP_31720 | 2185 | C | T | 10  | 7   | --   | --        |
|            | Ca(ICCV2/PI489777)SNP_31721 | 2303 | C | A | 8   | 5   | --   | --        |
| CakTC42971 | Ca(ICCV2/PI489777)SNP_31722 | 280  | A | G | 24  | 4   | --   | AP2-EREBP |
|            | Ca(ICCV2/PI489777)SNP_31723 | 466  | T | C | 22  | 4   | --   | AP2-EREBP |
| CakTC18716 | Ca(ICCV2/PI489777)SNP_31724 | 3224 | G | T | 3   | 3   | --   | --        |
| CakTC27571 | Ca(ICCV2/PI489777)SNP_31725 | 151  | T | C | 18  | 3   | --   | --        |
|            | Ca(ICCV2/PI489777)SNP_31726 | 441  | G | A | 22  | 4   | --   | --        |
|            | Ca(ICCV2/PI489777)SNP_31727 | 508  | C | G | 15  | 3   | --   | --        |
|            | Ca(ICCV2/PI489777)SNP_31728 | 852  | C | T | 12  | 10  | --   | --        |
|            | Ca(ICCV2/PI489777)SNP_31729 | 983  | T | C | 19  | 10  | --   | --        |
|            | Ca(ICCV2/PI489777)SNP_31730 | 1188 | A | C | 10  | 6   | --   | --        |
| CakTC37097 | Ca(ICCV2/PI489777)SNP_31731 | 1901 | A | G | 25  | 28  | --   | --        |
|            | Ca(ICCV2/PI489777)SNP_31732 | 1949 | T | C | 27  | 30  | --   | --        |
|            | Ca(ICCV2/PI489777)SNP_31733 | 1952 | T | C | 27  | 27  | --   | --        |
|            | Ca(ICCV2/PI489777)SNP_31734 | 2480 | G | C | 17  | 16  | --   | --        |
| CakTC29289 | Ca(ICCV2/PI489777)SNP_31735 | 1643 | A | T | 292 | 166 | --   | --        |
|            | Ca(ICCV2/PI489777)SNP_31736 | 2070 | C | T | 74  | 40  | --   | --        |
| CakTC40327 | Ca(ICCV2/PI489777)SNP_31737 | 219  | G | T | 9   | 22  | Root | AP2-EREBP |
| CakTC42230 | Ca(ICCV2/PI489777)SNP_31738 | 238  | G | T | 5   | 5   | --   | --        |
|            | Ca(ICCV2/PI489777)SNP_31739 | 506  | C | T | 7   | 7   | --   | --        |
|            | Ca(ICCV2/PI489777)SNP_31740 | 518  | A | C | 9   | 7   | --   | --        |
|            | Ca(ICCV2/PI489777)SNP_31741 | 920  | G | A | 13  | 9   | --   | --        |

|            |                             |      |   |   |     |    |        |             |
|------------|-----------------------------|------|---|---|-----|----|--------|-------------|
|            | Ca(ICCV2/PI489777)SNP_31742 | 1496 | A | G | 19  | 6  | --     | --          |
| CakTC25043 | Ca(ICCV2/PI489777)SNP_31743 | 937  | T | A | 57  | 29 | --     | --          |
|            | Ca(ICCV2/PI489777)SNP_31744 | 964  | G | A | 53  | 28 | --     | --          |
|            | Ca(ICCV2/PI489777)SNP_31745 | 1213 | C | T | 40  | 27 | --     | --          |
| CakTC28771 | Ca(ICCV2/PI489777)SNP_31746 | 340  | A | C | 8   | 7  | --     | Bromodomain |
|            | Ca(ICCV2/PI489777)SNP_31747 | 1560 | G | A | 22  | 13 | --     | Bromodomain |
| CakTC42612 | Ca(ICCV2/PI489777)SNP_31748 | 97   | C | T | 7   | 4  | --     | --          |
|            | Ca(ICCV2/PI489777)SNP_31749 | 124  | C | A | 7   | 5  | --     | --          |
|            | Ca(ICCV2/PI489777)SNP_31750 | 196  | G | A | 8   | 6  | --     | --          |
|            | Ca(ICCV2/PI489777)SNP_31751 | 277  | C | G | 7   | 6  | --     | --          |
| CakTC43148 | Ca(ICCV2/PI489777)SNP_31752 | 493  | T | C | 14  | 7  | --     | bHLH        |
| CakTC32944 | Ca(ICCV2/PI489777)SNP_31753 | 843  | T | C | 59  | 33 | --     | --          |
|            | Ca(ICCV2/PI489777)SNP_31754 | 1449 | G | A | 59  | 23 | --     | --          |
|            | Ca(ICCV2/PI489777)SNP_31755 | 1719 | A | G | 46  | 27 | --     | --          |
|            | Ca(ICCV2/PI489777)SNP_31756 | 2406 | T | A | 38  | 29 | --     | --          |
|            | Ca(ICCV2/PI489777)SNP_31757 | 2675 | G | C | 26  | 21 | --     | --          |
| CakTC42289 | Ca(ICCV2/PI489777)SNP_31758 | 169  | G | A | 11  | 16 | --     | --          |
| CakTC31381 | Ca(ICCV2/PI489777)SNP_31759 | 1523 | A | G | 4   | 5  | --     | --          |
| CakTC39795 | Ca(ICCV2/PI489777)SNP_31760 | 340  | C | T | 14  | 7  | --     | --          |
|            | Ca(ICCV2/PI489777)SNP_31761 | 872  | T | C | 6   | 7  | --     | --          |
|            | Ca(ICCV2/PI489777)SNP_31762 | 1062 | A | G | 3   | 7  | --     | --          |
|            | Ca(ICCV2/PI489777)SNP_31763 | 1109 | A | G | 3   | 9  | --     | --          |
| CakTC28863 | Ca(ICCV2/PI489777)SNP_31764 | 1943 | G | A | 7   | 3  | --     | --          |
| CakTC10525 | Ca(ICCV2/PI489777)SNP_31765 | 1347 | T | C | 6   | 4  | --     | --          |
|            | Ca(ICCV2/PI489777)SNP_31766 | 1649 | A | C | 3   | 3  | --     | --          |
| CakTC33664 | Ca(ICCV2/PI489777)SNP_31767 | 67   | G | C | 65  | 36 | --     | --          |
|            | Ca(ICCV2/PI489777)SNP_31768 | 88   | A | G | 74  | 37 | --     | --          |
|            | Ca(ICCV2/PI489777)SNP_31769 | 419  | C | A | 158 | 89 | --     | --          |
| CakTC26024 | Ca(ICCV2/PI489777)SNP_31770 | 159  | A | T | 18  | 17 | --     | --          |
| CakTC40476 | Ca(ICCV2/PI489777)SNP_31771 | 141  | T | C | 8   | 7  | --     | --          |
| CakTC15504 | Ca(ICCV2/PI489777)SNP_31772 | 339  | T | C | 15  | 18 | --     | --          |
|            | Ca(ICCV2/PI489777)SNP_31773 | 475  | A | G | 17  | 17 | --     | --          |
|            | Ca(ICCV2/PI489777)SNP_31774 | 2378 | T | G | 8   | 8  | --     | --          |
| CakTC25056 | Ca(ICCV2/PI489777)SNP_31775 | 648  | G | A | 23  | 8  | --     | --          |
| CakTC26498 | Ca(ICCV2/PI489777)SNP_31776 | 718  | G | A | 11  | 4  | --     | --          |
|            | Ca(ICCV2/PI489777)SNP_31777 | 725  | G | A | 10  | 4  | --     | --          |
|            | Ca(ICCV2/PI489777)SNP_31778 | 729  | G | C | 10  | 4  | --     | --          |
|            | Ca(ICCV2/PI489777)SNP_31779 | 751  | A | T | 11  | 4  | --     | --          |
|            | Ca(ICCV2/PI489777)SNP_31780 | 794  | G | C | 9   | 4  | --     | --          |
|            | Ca(ICCV2/PI489777)SNP_31781 | 836  | T | C | 11  | 4  | --     | --          |
| CakTC31525 | Ca(ICCV2/PI489777)SNP_31782 | 440  | A | G | 19  | 3  | --     | --          |
|            | Ca(ICCV2/PI489777)SNP_31783 | 467  | T | A | 14  | 3  | --     | --          |
|            | Ca(ICCV2/PI489777)SNP_31784 | 860  | A | T | 24  | 5  | --     | --          |
|            | Ca(ICCV2/PI489777)SNP_31785 | 947  | G | T | 22  | 5  | --     | --          |
|            | Ca(ICCV2/PI489777)SNP_31786 | 1005 | A | T | 21  | 3  | --     | --          |
| CakTC27619 | Ca(ICCV2/PI489777)SNP_31787 | 838  | G | A | 23  | 15 | --     | LOB         |
| CakTC33092 | Ca(ICCV2/PI489777)SNP_31788 | 179  | G | C | 6   | 3  | --     | --          |
|            | Ca(ICCV2/PI489777)SNP_31789 | 503  | C | T | 6   | 3  | --     | --          |
|            | Ca(ICCV2/PI489777)SNP_31790 | 527  | G | T | 7   | 3  | --     | --          |
| CakTC23285 | Ca(ICCV2/PI489777)SNP_31791 | 371  | C | T | 12  | 4  | Flower | bud         |
|            | Ca(ICCV2/PI489777)SNP_31792 | 1347 | A | T | 3   | 4  | Flower | bud         |
|            | Ca(ICCV2/PI489777)SNP_31793 | 1364 | C | T | 5   | 8  | Flower | bud         |
|            | Ca(ICCV2/PI489777)SNP_31794 | 1497 | C | T | 3   | 8  | Flower | bud         |
|            | Ca(ICCV2/PI489777)SNP_31795 | 1499 | C | A | 4   | 8  | Flower | bud         |
| CakTC42224 | Ca(ICCV2/PI489777)SNP_31796 | 154  | G | C | 12  | 5  | --     | --          |
|            | Ca(ICCV2/PI489777)SNP_31797 | 535  | C | G | 13  | 4  | --     | --          |
|            | Ca(ICCV2/PI489777)SNP_31798 | 877  | G | A | 9   | 6  | --     | --          |
|            | Ca(ICCV2/PI489777)SNP_31799 | 1643 | A | G | 8   | 5  | --     | --          |
|            | Ca(ICCV2/PI489777)SNP_31800 | 1695 | A | C | 7   | 3  | --     | --          |
| CakTC11723 | Ca(ICCV2/PI489777)SNP_31801 | 503  | C | A | 4   | 3  | --     | --          |
| CakTC36227 | Ca(ICCV2/PI489777)SNP_31802 | 48   | G | A | 27  | 19 | --     | --          |
|            | Ca(ICCV2/PI489777)SNP_31803 | 885  | G | A | 58  | 18 | --     | --          |
|            | Ca(ICCV2/PI489777)SNP_31804 | 1029 | G | A | 37  | 13 | --     | --          |
| CakTC09641 | Ca(ICCV2/PI489777)SNP_31805 | 2813 | A | G | 6   | 3  | --     | --          |
| CakTC40493 | Ca(ICCV2/PI489777)SNP_31806 | 612  | A | G | 6   | 13 | --     | --          |
| CakTC22700 | Ca(ICCV2/PI489777)SNP_31807 | 352  | A | T | 11  | 4  | --     | --          |
| CakTC39466 | Ca(ICCV2/PI489777)SNP_31808 | 778  | A | T | 9   | 9  | --     | --          |
|            | Ca(ICCV2/PI489777)SNP_31809 | 858  | T | A | 8   | 10 | --     | --          |
|            | Ca(ICCV2/PI489777)SNP_31810 | 892  | A | G | 5   | 11 | --     | --          |
|            | Ca(ICCV2/PI489777)SNP_31811 | 908  | T | C | 8   | 12 | --     | --          |
| CakTC41871 | Ca(ICCV2/PI489777)SNP_31812 | 147  | T | A | 10  | 6  | --     | --          |
|            | Ca(ICCV2/PI489777)SNP_31813 | 199  | G | T | 14  | 7  | --     | --          |
|            | Ca(ICCV2/PI489777)SNP_31814 | 274  | G | A | 16  | 5  | --     | --          |
|            | Ca(ICCV2/PI489777)SNP_31815 | 298  | T | C | 16  | 9  | --     | --          |

|            |                            |      |   |   |     |     |           |     |
|------------|----------------------------|------|---|---|-----|-----|-----------|-----|
|            | Ca(ICC2/PI489777)SNP_31816 | 391  | T | C | 17  | 13  | --        | --  |
| CakTC34593 | Ca(ICC2/PI489777)SNP_31817 | 377  | T | C | 3   | 5   | --        | --  |
|            | Ca(ICC2/PI489777)SNP_31818 | 558  | A | C | 3   | 4   | --        | --  |
|            | Ca(ICC2/PI489777)SNP_31819 | 560  | G | A | 3   | 4   | --        | --  |
| CakTC31249 | Ca(ICC2/PI489777)SNP_31820 | 340  | T | G | 23  | 29  | --        | --  |
|            | Ca(ICC2/PI489777)SNP_31821 | 503  | G | T | 17  | 24  | --        | --  |
|            | Ca(ICC2/PI489777)SNP_31822 | 1304 | A | G | 9   | 31  | --        | --  |
|            | Ca(ICC2/PI489777)SNP_31823 | 1862 | A | G | 26  | 27  | --        | --  |
|            | Ca(ICC2/PI489777)SNP_31824 | 2319 | G | A | 18  | 9   | --        | --  |
| CakTC29898 | Ca(ICC2/PI489777)SNP_31825 | 730  | A | G | 20  | 10  | Flower    | bud |
|            | Ca(ICC2/PI489777)SNP_31826 | 2014 | G | A | 23  | 13  | Flower    | bud |
|            | Ca(ICC2/PI489777)SNP_31827 | 2086 | A | C | 27  | 11  | Flower    | bud |
|            | Ca(ICC2/PI489777)SNP_31828 | 3260 | T | G | 10  | 7   | Flower    | bud |
|            | Ca(ICC2/PI489777)SNP_31829 | 3434 | T | C | 8   | 4   | Flower    | bud |
| CakTC00264 | Ca(ICC2/PI489777)SNP_31830 | 316  | T | A | 27  | 23  | --        | --  |
|            | Ca(ICC2/PI489777)SNP_31831 | 849  | A | G | 89  | 55  | --        | --  |
| CakTC43233 | Ca(ICC2/PI489777)SNP_31832 | 563  | A | G | 21  | 18  | --        | --  |
|            | Ca(ICC2/PI489777)SNP_31833 | 975  | T | C | 19  | 14  | --        | --  |
| CakTC37203 | Ca(ICC2/PI489777)SNP_31834 | 225  | G | A | 6   | 4   | --        | --  |
| CakTC40434 | Ca(ICC2/PI489777)SNP_31835 | 680  | C | T | 4   | 7   | --        | --  |
| CakTC31532 | Ca(ICC2/PI489777)SNP_31836 | 344  | C | G | 3   | 12  | --        | --  |
|            | Ca(ICC2/PI489777)SNP_31837 | 1193 | G | C | 10  | 3   | --        | --  |
| CakTC24653 | Ca(ICC2/PI489777)SNP_31838 | 993  | C | T | 11  | 3   | Young_pod | --  |
|            | Ca(ICC2/PI489777)SNP_31839 | 1215 | T | G | 17  | 4   | Young_pod | --  |
|            | Ca(ICC2/PI489777)SNP_31840 | 1336 | G | A | 12  | 3   | Young_pod | --  |
| CakTC40940 | Ca(ICC2/PI489777)SNP_31841 | 272  | T | C | 3   | 4   | --        | --  |
|            | Ca(ICC2/PI489777)SNP_31842 | 455  | A | G | 4   | 12  | --        | --  |
|            | Ca(ICC2/PI489777)SNP_31843 | 632  | C | G | 5   | 15  | --        | --  |
| CakTC41749 | Ca(ICC2/PI489777)SNP_31844 | 27   | G | T | 3   | 5   | --        | --  |
|            | Ca(ICC2/PI489777)SNP_31845 | 54   | A | T | 17  | 20  | --        | --  |
|            | Ca(ICC2/PI489777)SNP_31846 | 386  | C | T | 32  | 51  | --        | --  |
| CakTC41961 | Ca(ICC2/PI489777)SNP_31847 | 337  | C | T | 29  | 17  | --        | --  |
|            | Ca(ICC2/PI489777)SNP_31848 | 927  | C | T | 16  | 3   | --        | --  |
| CakTC39163 | Ca(ICC2/PI489777)SNP_31849 | 968  | C | T | 11  | 12  | --        | --  |
| CakTC40364 | Ca(ICC2/PI489777)SNP_31850 | 631  | G | A | 12  | 4   | --        | --  |
| CakTC37527 | Ca(ICC2/PI489777)SNP_31851 | 195  | T | A | 7   | 12  | --        | --  |
|            | Ca(ICC2/PI489777)SNP_31852 | 240  | A | G | 11  | 12  | --        | --  |
|            | Ca(ICC2/PI489777)SNP_31853 | 244  | G | A | 11  | 12  | --        | --  |
|            | Ca(ICC2/PI489777)SNP_31854 | 487  | A | G | 10  | 6   | --        | --  |
| CakTC29789 | Ca(ICC2/PI489777)SNP_31855 | 545  | T | C | 5   | 3   | --        | --  |
|            | Ca(ICC2/PI489777)SNP_31856 | 619  | A | T | 4   | 3   | --        | --  |
|            | Ca(ICC2/PI489777)SNP_31857 | 719  | C | A | 5   | 3   | --        | --  |
|            | Ca(ICC2/PI489777)SNP_31858 | 1010 | T | C | 5   | 5   | --        | --  |
| CakTC30869 | Ca(ICC2/PI489777)SNP_31859 | 449  | G | A | 11  | 8   | --        | --  |
|            | Ca(ICC2/PI489777)SNP_31860 | 1011 | G | T | 5   | 9   | --        | --  |
| CakTC24367 | Ca(ICC2/PI489777)SNP_31861 | 647  | T | C | 17  | 10  | --        | --  |
|            | Ca(ICC2/PI489777)SNP_31862 | 694  | G | A | 15  | 11  | --        | --  |
|            | Ca(ICC2/PI489777)SNP_31863 | 908  | A | G | 15  | 13  | --        | --  |
| CakTC33304 | Ca(ICC2/PI489777)SNP_31864 | 272  | G | T | 10  | 5   | --        | --  |
|            | Ca(ICC2/PI489777)SNP_31865 | 306  | A | G | 8   | 8   | --        | --  |
|            | Ca(ICC2/PI489777)SNP_31866 | 428  | C | A | 10  | 8   | --        | --  |
|            | Ca(ICC2/PI489777)SNP_31867 | 1556 | A | G | 9   | 5   | --        | --  |
|            | Ca(ICC2/PI489777)SNP_31868 | 1661 | G | A | 10  | 6   | --        | --  |
|            | Ca(ICC2/PI489777)SNP_31869 | 1694 | G | A | 9   | 5   | --        | --  |
|            | Ca(ICC2/PI489777)SNP_31870 | 1835 | T | A | 3   | 3   | --        | --  |
|            | Ca(ICC2/PI489777)SNP_31871 | 2165 | G | A | 4   | 5   | --        | --  |
| CakTC39060 | Ca(ICC2/PI489777)SNP_31872 | 32   | G | T | 11  | 11  | --        | --  |
|            | Ca(ICC2/PI489777)SNP_31873 | 61   | T | A | 14  | 14  | --        | --  |
|            | Ca(ICC2/PI489777)SNP_31874 | 385  | C | T | 24  | 9   | --        | --  |
| CakTC10729 | Ca(ICC2/PI489777)SNP_31875 | 1015 | A | G | 7   | 4   | --        | --  |
| CakTC25073 | Ca(ICC2/PI489777)SNP_31876 | 104  | C | G | 258 | 174 | --        | --  |
| CakTC40211 | Ca(ICC2/PI489777)SNP_31877 | 1228 | C | T | 4   | 4   | --        | --  |
| CakTC11223 | Ca(ICC2/PI489777)SNP_31878 | 244  | T | A | 6   | 3   | --        | --  |
|            | Ca(ICC2/PI489777)SNP_31879 | 277  | T | C | 6   | 5   | --        | --  |
|            | Ca(ICC2/PI489777)SNP_31880 | 367  | C | T | 5   | 8   | --        | --  |
|            | Ca(ICC2/PI489777)SNP_31881 | 965  | C | A | 6   | 3   | --        | --  |
| CakTC42237 | Ca(ICC2/PI489777)SNP_31882 | 711  | G | A | 19  | 9   | --        | --  |
|            | Ca(ICC2/PI489777)SNP_31883 | 1316 | A | G | 19  | 18  | --        | --  |
|            | Ca(ICC2/PI489777)SNP_31884 | 1542 | C | T | 13  | 16  | --        | --  |
| CakTC26298 | Ca(ICC2/PI489777)SNP_31885 | 1824 | C | T | 32  | 19  | --        | --  |
|            | Ca(ICC2/PI489777)SNP_31886 | 2395 | C | G | 10  | 8   | --        | --  |
| CakTC41105 | Ca(ICC2/PI489777)SNP_31887 | 102  | G | A | 9   | 3   | --        | --  |
|            | Ca(ICC2/PI489777)SNP_31888 | 596  | C | T | 30  | 4   | --        | --  |
|            | Ca(ICC2/PI489777)SNP_31889 | 976  | G | A | 20  | 7   | --        | --  |

|            |                            |      |   |   |     |     |        |     |
|------------|----------------------------|------|---|---|-----|-----|--------|-----|
| CakTC30695 | Ca(ICC2/PI489777)SNP_31890 | 104  | A | G | 5   | 4   | --     | --  |
|            | Ca(ICC2/PI489777)SNP_31891 | 1111 | C | T | 5   | 7   | --     | --  |
|            | Ca(ICC2/PI489777)SNP_31892 | 1123 | A | G | 6   | 7   | --     | --  |
| CakTC31456 | Ca(ICC2/PI489777)SNP_31893 | 589  | C | T | 4   | 6   | --     | --  |
|            | Ca(ICC2/PI489777)SNP_31894 | 869  | G | A | 9   | 7   | --     | --  |
|            | Ca(ICC2/PI489777)SNP_31895 | 1121 | G | A | 3   | 4   | --     | --  |
| CakTC39766 | Ca(ICC2/PI489777)SNP_31896 | 239  | T | G | 20  | 8   | --     | --  |
|            | Ca(ICC2/PI489777)SNP_31897 | 313  | C | T | 24  | 12  | --     | --  |
|            | Ca(ICC2/PI489777)SNP_31898 | 386  | C | T | 30  | 12  | --     | --  |
|            | Ca(ICC2/PI489777)SNP_31899 | 460  | T | C | 23  | 12  | --     | --  |
|            | Ca(ICC2/PI489777)SNP_31900 | 880  | T | C | 19  | 9   | --     | --  |
|            | Ca(ICC2/PI489777)SNP_31901 | 999  | A | T | 22  | 5   | --     | --  |
|            | Ca(ICC2/PI489777)SNP_31902 | 1014 | A | G | 20  | 6   | --     | --  |
|            | Ca(ICC2/PI489777)SNP_31903 | 1017 | G | A | 20  | 5   | --     | --  |
|            | Ca(ICC2/PI489777)SNP_31904 | 1051 | A | G | 18  | 3   | --     | --  |
|            | Ca(ICC2/PI489777)SNP_31905 | 1194 | T | G | 14  | 7   | --     | --  |
| CakTC41297 | Ca(ICC2/PI489777)SNP_31906 | 252  | G | C | 4   | 4   | Root   | --  |
|            | Ca(ICC2/PI489777)SNP_31907 | 652  | T | C | 10  | 4   | Root   | --  |
| CakTC25268 | Ca(ICC2/PI489777)SNP_31908 | 19   | A | G | 3   | 14  | --     | --  |
|            | Ca(ICC2/PI489777)SNP_31909 | 28   | C | T | 3   | 12  | --     | --  |
|            | Ca(ICC2/PI489777)SNP_31910 | 42   | C | T | 3   | 15  | --     | --  |
|            | Ca(ICC2/PI489777)SNP_31911 | 108  | G | A | 4   | 18  | --     | --  |
|            | Ca(ICC2/PI489777)SNP_31912 | 111  | T | C | 3   | 19  | --     | --  |
|            | Ca(ICC2/PI489777)SNP_31913 | 121  | A | G | 4   | 19  | --     | --  |
|            | Ca(ICC2/PI489777)SNP_31914 | 125  | A | G | 4   | 19  | --     | --  |
|            | Ca(ICC2/PI489777)SNP_31915 | 531  | T | C | 4   | 25  | --     | --  |
|            | Ca(ICC2/PI489777)SNP_31916 | 552  | T | C | 4   | 29  | --     | --  |
|            | Ca(ICC2/PI489777)SNP_31917 | 723  | T | A | 10  | 27  | --     | --  |
|            | Ca(ICC2/PI489777)SNP_31918 | 741  | T | A | 10  | 28  | --     | --  |
|            | Ca(ICC2/PI489777)SNP_31919 | 843  | C | A | 8   | 19  | --     | --  |
|            | Ca(ICC2/PI489777)SNP_31920 | 888  | C | T | 6   | 22  | --     | --  |
|            | Ca(ICC2/PI489777)SNP_31921 | 1410 | T | C | 4   | 12  | --     | --  |
|            | Ca(ICC2/PI489777)SNP_31922 | 1437 | A | T | 3   | 9   | --     | --  |
| CakTC40720 | Ca(ICC2/PI489777)SNP_31923 | 211  | T | G | 13  | 6   | --     | --  |
|            | Ca(ICC2/PI489777)SNP_31924 | 581  | G | A | 7   | 7   | --     | --  |
| CakTC25331 | Ca(ICC2/PI489777)SNP_31925 | 388  | G | C | 64  | 36  | --     | EIL |
|            | Ca(ICC2/PI489777)SNP_31926 | 541  | G | A | 84  | 43  | --     | EIL |
|            | Ca(ICC2/PI489777)SNP_31927 | 659  | C | T | 168 | 88  | --     | EIL |
|            | Ca(ICC2/PI489777)SNP_31928 | 677  | A | G | 167 | 95  | --     | EIL |
|            | Ca(ICC2/PI489777)SNP_31929 | 873  | C | A | 196 | 101 | --     | EIL |
|            | Ca(ICC2/PI489777)SNP_31930 | 1675 | A | G | 144 | 43  | --     | EIL |
|            | Ca(ICC2/PI489777)SNP_31931 | 2377 | G | A | 15  | 32  | --     | EIL |
|            | Ca(ICC2/PI489777)SNP_31932 | 2395 | A | G | 24  | 30  | --     | EIL |
| CakTC34143 | Ca(ICC2/PI489777)SNP_31933 | 441  | A | G | 4   | 3   | --     | --  |
|            | Ca(ICC2/PI489777)SNP_31934 | 459  | G | A | 3   | 3   | --     | --  |
|            | Ca(ICC2/PI489777)SNP_31935 | 543  | T | G | 4   | 3   | --     | --  |
| CakTC27902 | Ca(ICC2/PI489777)SNP_31936 | 724  | A | G | 6   | 6   | --     | --  |
|            | Ca(ICC2/PI489777)SNP_31937 | 787  | C | G | 5   | 6   | --     | --  |
| CakTC30047 | Ca(ICC2/PI489777)SNP_31938 | 145  | T | C | 3   | 5   | Flower | bud |
|            | Ca(ICC2/PI489777)SNP_31939 | 164  | G | A | 3   | 5   | Flower | bud |
|            | Ca(ICC2/PI489777)SNP_31940 | 349  | T | C | 4   | 3   | Flower | bud |
| CakTC10445 | Ca(ICC2/PI489777)SNP_31941 | 989  | C | T | 8   | 5   | --     | BSD |
| CakTC32910 | Ca(ICC2/PI489777)SNP_31942 | 2113 | C | A | 19  | 5   | --     | --  |
|            | Ca(ICC2/PI489777)SNP_31943 | 2350 | C | G | 22  | 11  | --     | --  |
| CakTC39437 | Ca(ICC2/PI489777)SNP_31944 | 415  | A | G | 4   | 3   | --     | --  |
|            | Ca(ICC2/PI489777)SNP_31945 | 991  | G | A | 5   | 10  | --     | --  |
|            | Ca(ICC2/PI489777)SNP_31946 | 1214 | A | G | 17  | 10  | --     | --  |
|            | Ca(ICC2/PI489777)SNP_31947 | 1245 | T | G | 18  | 11  | --     | --  |
| CakTC25617 | Ca(ICC2/PI489777)SNP_31948 | 189  | A | T | 27  | 12  | --     | --  |
|            | Ca(ICC2/PI489777)SNP_31949 | 208  | T | A | 26  | 12  | --     | --  |
|            | Ca(ICC2/PI489777)SNP_31950 | 748  | G | T | 28  | 7   | --     | --  |
|            | Ca(ICC2/PI489777)SNP_31951 | 1003 | G | A | 21  | 9   | --     | --  |
|            | Ca(ICC2/PI489777)SNP_31952 | 1240 | C | A | 30  | 11  | --     | --  |
|            | Ca(ICC2/PI489777)SNP_31953 | 1621 | T | C | 51  | 16  | --     | --  |
|            | Ca(ICC2/PI489777)SNP_31954 | 1947 | A | G | 60  | 13  | --     | --  |
|            | Ca(ICC2/PI489777)SNP_31955 | 2249 | A | T | 47  | 13  | --     | --  |
| CakTC22989 | Ca(ICC2/PI489777)SNP_31956 | 42   | A | C | 8   | 4   | --     | --  |
| CakTC42723 | Ca(ICC2/PI489777)SNP_31957 | 139  | T | C | 31  | 12  | --     | --  |
|            | Ca(ICC2/PI489777)SNP_31958 | 376  | T | C | 32  | 17  | --     | --  |
|            | Ca(ICC2/PI489777)SNP_31959 | 602  | A | C | 18  | 16  | --     | --  |
| CakTC39145 | Ca(ICC2/PI489777)SNP_31960 | 156  | C | T | 7   | 3   | --     | --  |
|            | Ca(ICC2/PI489777)SNP_31961 | 618  | A | T | 10  | 4   | --     | --  |
|            | Ca(ICC2/PI489777)SNP_31962 | 918  | A | G | 17  | 7   | --     | --  |
|            | Ca(ICC2/PI489777)SNP_31963 | 962  | A | C | 11  | 5   | --     | --  |



|            |                            |      |   |   |    |    |       |          |
|------------|----------------------------|------|---|---|----|----|-------|----------|
|            | Ca(ICC2/PI489777)SNP_31964 | 1134 | G | T | 10 | 7  | --    | --       |
|            | Ca(ICC2/PI489777)SNP_31965 | 1195 | A | G | 9  | 9  | --    | --       |
|            | Ca(ICC2/PI489777)SNP_31966 | 1198 | A | G | 9  | 9  | --    | --       |
|            | Ca(ICC2/PI489777)SNP_31967 | 1221 | G | A | 10 | 10 | --    | --       |
|            | Ca(ICC2/PI489777)SNP_31968 | 1227 | A | G | 9  | 9  | --    | --       |
|            | Ca(ICC2/PI489777)SNP_31969 | 1235 | T | G | 10 | 10 | --    | --       |
|            | Ca(ICC2/PI489777)SNP_31970 | 1243 | T | C | 10 | 9  | --    | --       |
|            | Ca(ICC2/PI489777)SNP_31971 | 1256 | G | A | 9  | 7  | --    | --       |
|            | Ca(ICC2/PI489777)SNP_31972 | 1360 | A | G | 8  | 7  | --    | --       |
| CakTC39561 | Ca(ICC2/PI489777)SNP_31973 | 769  | A | G | 5  | 3  | --    | --       |
| CakTC33944 | Ca(ICC2/PI489777)SNP_31974 | 387  | C | T | 4  | 7  | --    | --       |
|            | Ca(ICC2/PI489777)SNP_31975 | 411  | A | G | 5  | 9  | --    | --       |
|            | Ca(ICC2/PI489777)SNP_31976 | 573  | C | T | 8  | 9  | --    | --       |
|            | Ca(ICC2/PI489777)SNP_31977 | 854  | G | A | 10 | 8  | --    | --       |
|            | Ca(ICC2/PI489777)SNP_31978 | 1850 | C | T | 11 | 5  | --    | --       |
| CakTC42315 | Ca(ICC2/PI489777)SNP_31979 | 1387 | T | G | 6  | 5  | --    | Trihelix |
|            | Ca(ICC2/PI489777)SNP_31980 | 1474 | G | A | 7  | 3  | --    | Trihelix |
| CakTC35272 | Ca(ICC2/PI489777)SNP_31981 | 413  | A | G | 6  | 10 | --    | --       |
|            | Ca(ICC2/PI489777)SNP_31982 | 896  | G | C | 8  | 3  | --    | --       |
|            | Ca(ICC2/PI489777)SNP_31983 | 1310 | A | G | 14 | 10 | --    | --       |
|            | Ca(ICC2/PI489777)SNP_31984 | 1988 | T | C | 11 | 4  | --    | --       |
|            | Ca(ICC2/PI489777)SNP_31985 | 2117 | G | A | 9  | 19 | --    | --       |
|            | Ca(ICC2/PI489777)SNP_31986 | 2207 | C | A | 12 | 25 | --    | --       |
|            | Ca(ICC2/PI489777)SNP_31987 | 2549 | C | T | 11 | 7  | --    | --       |
|            | Ca(ICC2/PI489777)SNP_31988 | 2648 | T | C | 11 | 6  | --    | --       |
|            | Ca(ICC2/PI489777)SNP_31989 | 2675 | T | A | 11 | 6  | --    | --       |
| CakTC33525 | Ca(ICC2/PI489777)SNP_31990 | 117  | A | T | 67 | 89 | --    | --       |
|            | Ca(ICC2/PI489777)SNP_31991 | 611  | G | A | 44 | 53 | --    | --       |
| CakTC30117 | Ca(ICC2/PI489777)SNP_31992 | 285  | A | G | 14 | 4  | --    | --       |
|            | Ca(ICC2/PI489777)SNP_31993 | 411  | G | A | 12 | 4  | --    | --       |
|            | Ca(ICC2/PI489777)SNP_31994 | 464  | T | C | 14 | 3  | --    | --       |
| CakTC29415 | Ca(ICC2/PI489777)SNP_31995 | 817  | G | C | 6  | 5  | Shoot | --       |
|            | Ca(ICC2/PI489777)SNP_31996 | 869  | G | A | 8  | 5  | Shoot | --       |
|            | Ca(ICC2/PI489777)SNP_31997 | 1253 | G | A | 10 | 4  | Shoot | --       |
| CakTC33544 | Ca(ICC2/PI489777)SNP_31998 | 4509 | C | T | 11 | 5  | --    | --       |
|            | Ca(ICC2/PI489777)SNP_31999 | 7983 | A | T | 4  | 7  | --    | --       |
|            | Ca(ICC2/PI489777)SNP_32000 | 8029 | A | T | 5  | 6  | --    | --       |
|            | Ca(ICC2/PI489777)SNP_32001 | 8030 | A | G | 5  | 6  | --    | --       |
|            | Ca(ICC2/PI489777)SNP_32002 | 8225 | C | T | 3  | 3  | --    | --       |
| CakTC22620 | Ca(ICC2/PI489777)SNP_32003 | 258  | G | C | 21 | 10 | --    | --       |
|            | Ca(ICC2/PI489777)SNP_32004 | 259  | T | A | 21 | 10 | --    | --       |
| CakTC39955 | Ca(ICC2/PI489777)SNP_32005 | 255  | G | A | 4  | 8  | --    | --       |
|            | Ca(ICC2/PI489777)SNP_32006 | 444  | A | G | 11 | 4  | --    | --       |
| CakTC39553 | Ca(ICC2/PI489777)SNP_32007 | 437  | G | A | 9  | 3  | --    | --       |
|            | Ca(ICC2/PI489777)SNP_32008 | 846  | C | G | 9  | 3  | --    | --       |
| CakTC28095 | Ca(ICC2/PI489777)SNP_32009 | 559  | G | T | 35 | 29 | --    | --       |
| CakTC34734 | Ca(ICC2/PI489777)SNP_32010 | 2767 | A | C | 11 | 4  | --    | --       |
| CakTC32820 | Ca(ICC2/PI489777)SNP_32011 | 2133 | G | A | 14 | 12 | --    | --       |
|            | Ca(ICC2/PI489777)SNP_32012 | 2662 | A | G | 8  | 9  | --    | --       |
|            | Ca(ICC2/PI489777)SNP_32013 | 2827 | T | C | 8  | 3  | --    | --       |
|            | Ca(ICC2/PI489777)SNP_32014 | 2830 | G | T | 8  | 3  | --    | --       |
| CakTC30313 | Ca(ICC2/PI489777)SNP_32015 | 807  | C | A | 9  | 5  | --    | --       |
| CakTC25899 | Ca(ICC2/PI489777)SNP_32016 | 504  | C | T | 11 | 8  | --    | --       |
|            | Ca(ICC2/PI489777)SNP_32017 | 546  | T | C | 6  | 9  | --    | --       |
| CakTC43053 | Ca(ICC2/PI489777)SNP_32018 | 268  | G | T | 8  | 10 | --    | --       |
|            | Ca(ICC2/PI489777)SNP_32019 | 895  | T | C | 8  | 9  | --    | --       |
|            | Ca(ICC2/PI489777)SNP_32020 | 1021 | C | T | 10 | 6  | --    | --       |
|            | Ca(ICC2/PI489777)SNP_32021 | 1051 | A | C | 8  | 6  | --    | --       |
|            | Ca(ICC2/PI489777)SNP_32022 | 1288 | A | G | 6  | 3  | --    | --       |
|            | Ca(ICC2/PI489777)SNP_32023 | 1462 | G | A | 5  | 5  | --    | --       |
| CakTC35684 | Ca(ICC2/PI489777)SNP_32024 | 1085 | C | T | 10 | 6  | --    | SBP      |
|            | Ca(ICC2/PI489777)SNP_32025 | 1174 | G | A | 9  | 6  | --    | SBP      |
|            | Ca(ICC2/PI489777)SNP_32026 | 1913 | T | A | 12 | 7  | --    | SBP      |
|            | Ca(ICC2/PI489777)SNP_32027 | 2114 | C | T | 10 | 8  | --    | SBP      |
|            | Ca(ICC2/PI489777)SNP_32028 | 2154 | A | G | 9  | 9  | --    | SBP      |
|            | Ca(ICC2/PI489777)SNP_32029 | 2250 | G | A | 13 | 8  | --    | SBP      |
|            | Ca(ICC2/PI489777)SNP_32030 | 2430 | G | C | 11 | 5  | --    | SBP      |
|            | Ca(ICC2/PI489777)SNP_32031 | 2440 | C | T | 11 | 3  | --    | SBP      |
|            | Ca(ICC2/PI489777)SNP_32032 | 2734 | A | T | 3  | 3  | --    | SBP      |
|            | Ca(ICC2/PI489777)SNP_32033 | 2826 | G | A | 10 | 7  | --    | SBP      |
|            | Ca(ICC2/PI489777)SNP_32034 | 2842 | G | A | 10 | 6  | --    | SBP      |
|            | Ca(ICC2/PI489777)SNP_32035 | 2985 | C | T | 23 | 8  | --    | SBP      |
|            | Ca(ICC2/PI489777)SNP_32036 | 3291 | G | C | 18 | 13 | --    | SBP      |
|            | Ca(ICC2/PI489777)SNP_32037 | 3311 | G | A | 20 | 11 | --    | SBP      |

|            |                            |      |   |   |     |     |    |             |
|------------|----------------------------|------|---|---|-----|-----|----|-------------|
| CakTC34920 | Ca(ICC2/PI489777)SNP_32038 | 2830 | C | T | 4   | 4   | -- | --          |
|            | Ca(ICC2/PI489777)SNP_32039 | 2848 | A | G | 4   | 4   | -- | --          |
| CakTC00504 | Ca(ICC2/PI489777)SNP_32040 | 354  | T | G | 9   | 10  | -- | --          |
| CakTC29520 | Ca(ICC2/PI489777)SNP_32041 | 364  | C | A | 13  | 12  | -- | --          |
|            | Ca(ICC2/PI489777)SNP_32042 | 371  | C | G | 12  | 13  | -- | --          |
| CakTC39178 | Ca(ICC2/PI489777)SNP_32043 | 1306 | A | G | 18  | 3   | -- | --          |
|            | Ca(ICC2/PI489777)SNP_32044 | 1321 | A | T | 17  | 3   | -- | --          |
|            | Ca(ICC2/PI489777)SNP_32045 | 1363 | T | A | 18  | 3   | -- | --          |
|            | Ca(ICC2/PI489777)SNP_32046 | 1365 | G | T | 18  | 3   | -- | --          |
| CakTC36548 | Ca(ICC2/PI489777)SNP_32047 | 297  | C | T | 9   | 12  | -- | --          |
|            | Ca(ICC2/PI489777)SNP_32048 | 2064 | A | G | 21  | 32  | -- | --          |
| CakTC39093 | Ca(ICC2/PI489777)SNP_32049 | 1140 | T | C | 17  | 6   | -- | --          |
| CakTC34668 | Ca(ICC2/PI489777)SNP_32050 | 613  | A | G | 4   | 4   | -- | --          |
| CakTC40537 | Ca(ICC2/PI489777)SNP_32051 | 286  | C | T | 36  | 32  | -- | --          |
|            | Ca(ICC2/PI489777)SNP_32052 | 314  | T | C | 39  | 33  | -- | --          |
|            | Ca(ICC2/PI489777)SNP_32053 | 371  | T | A | 37  | 30  | -- | --          |
|            | Ca(ICC2/PI489777)SNP_32054 | 545  | G | A | 50  | 29  | -- | --          |
|            | Ca(ICC2/PI489777)SNP_32055 | 605  | A | C | 38  | 24  | -- | --          |
|            | Ca(ICC2/PI489777)SNP_32056 | 608  | A | G | 37  | 21  | -- | --          |
| CakTC10742 | Ca(ICC2/PI489777)SNP_32057 | 182  | A | G | 13  | 7   | -- | --          |
|            | Ca(ICC2/PI489777)SNP_32058 | 211  | A | G | 13  | 7   | -- | --          |
|            | Ca(ICC2/PI489777)SNP_32059 | 583  | T | A | 11  | 7   | -- | --          |
|            | Ca(ICC2/PI489777)SNP_32060 | 586  | G | T | 9   | 7   | -- | --          |
|            | Ca(ICC2/PI489777)SNP_32061 | 1123 | C | T | 30  | 14  | -- | --          |
|            | Ca(ICC2/PI489777)SNP_32062 | 1189 | G | T | 21  | 12  | -- | --          |
|            | Ca(ICC2/PI489777)SNP_32063 | 1195 | A | G | 21  | 15  | -- | --          |
|            | Ca(ICC2/PI489777)SNP_32064 | 1291 | A | T | 20  | 19  | -- | --          |
|            | Ca(ICC2/PI489777)SNP_32065 | 1305 | C | G | 22  | 18  | -- | --          |
|            | Ca(ICC2/PI489777)SNP_32066 | 1334 | A | G | 21  | 16  | -- | --          |
|            | Ca(ICC2/PI489777)SNP_32067 | 1371 | C | T | 22  | 12  | -- | --          |
|            | Ca(ICC2/PI489777)SNP_32068 | 1654 | G | T | 35  | 19  | -- | --          |
| CakTC34556 | Ca(ICC2/PI489777)SNP_32069 | 112  | C | T | 9   | 3   | -- | bHLH        |
|            | Ca(ICC2/PI489777)SNP_32070 | 485  | A | T | 14  | 8   | -- | bHLH        |
| CakTC23945 | Ca(ICC2/PI489777)SNP_32071 | 136  | C | G | 9   | 5   | -- | MYB-related |
|            | Ca(ICC2/PI489777)SNP_32072 | 206  | C | T | 18  | 8   | -- | MYB-related |
|            | Ca(ICC2/PI489777)SNP_32073 | 570  | T | A | 23  | 7   | -- | MYB-related |
|            | Ca(ICC2/PI489777)SNP_32074 | 641  | A | G | 25  | 6   | -- | MYB-related |
|            | Ca(ICC2/PI489777)SNP_32075 | 671  | G | A | 22  | 4   | -- | MYB-related |
|            | Ca(ICC2/PI489777)SNP_32076 | 707  | A | G | 21  | 4   | -- | MYB-related |
|            | Ca(ICC2/PI489777)SNP_32077 | 1015 | A | T | 21  | 5   | -- | MYB-related |
| CakTC40419 | Ca(ICC2/PI489777)SNP_32078 | 438  | A | G | 58  | 82  | -- | --          |
|            | Ca(ICC2/PI489777)SNP_32079 | 1345 | A | T | 33  | 65  | -- | --          |
| CakTC32333 | Ca(ICC2/PI489777)SNP_32080 | 1212 | A | G | 15  | 7   | -- | --          |
|            | Ca(ICC2/PI489777)SNP_32081 | 1353 | G | A | 12  | 9   | -- | --          |
| CakTC38688 | Ca(ICC2/PI489777)SNP_32082 | 1233 | A | G | 7   | 4   | -- | --          |
| CakTC39155 | Ca(ICC2/PI489777)SNP_32083 | 793  | G | T | 21  | 7   | -- | --          |
| CakTC38884 | Ca(ICC2/PI489777)SNP_32084 | 598  | A | G | 72  | 109 | -- | AUX/IAA     |
| CakTC41817 | Ca(ICC2/PI489777)SNP_32085 | 203  | G | A | 4   | 10  | -- | --          |
| CakTC02103 | Ca(ICC2/PI489777)SNP_32086 | 1078 | G | T | 4   | 13  | -- | --          |
|            | Ca(ICC2/PI489777)SNP_32087 | 1143 | G | C | 4   | 17  | -- | --          |
|            | Ca(ICC2/PI489777)SNP_32088 | 1253 | A | G | 3   | 16  | -- | --          |
| CakTC40786 | Ca(ICC2/PI489777)SNP_32089 | 456  | C | T | 110 | 134 | -- | --          |
|            | Ca(ICC2/PI489777)SNP_32090 | 724  | C | T | 20  | 15  | -- | --          |
| CakTC35923 | Ca(ICC2/PI489777)SNP_32091 | 526  | G | C | 5   | 3   | -- | --          |
|            | Ca(ICC2/PI489777)SNP_32092 | 617  | G | A | 8   | 3   | -- | --          |
|            | Ca(ICC2/PI489777)SNP_32093 | 919  | G | T | 18  | 15  | -- | --          |
|            | Ca(ICC2/PI489777)SNP_32094 | 1051 | C | A | 12  | 13  | -- | --          |
|            | Ca(ICC2/PI489777)SNP_32095 | 2373 | G | A | 12  | 4   | -- | --          |
|            | Ca(ICC2/PI489777)SNP_32096 | 2528 | C | G | 6   | 3   | -- | --          |
| CakTC14030 | Ca(ICC2/PI489777)SNP_32097 | 79   | A | G | 7   | 4   | -- | --          |
|            | Ca(ICC2/PI489777)SNP_32098 | 286  | T | C | 4   | 4   | -- | --          |
| CakTC25674 | Ca(ICC2/PI489777)SNP_32099 | 1787 | T | A | 4   | 6   | -- | --          |
| CakTC37684 | Ca(ICC2/PI489777)SNP_32100 | 303  | A | C | 3   | 3   | -- | --          |
|            | Ca(ICC2/PI489777)SNP_32101 | 351  | T | A | 3   | 3   | -- | --          |
|            | Ca(ICC2/PI489777)SNP_32102 | 663  | C | T | 4   | 3   | -- | --          |
|            | Ca(ICC2/PI489777)SNP_32103 | 730  | T | C | 6   | 5   | -- | --          |
|            | Ca(ICC2/PI489777)SNP_32104 | 744  | T | G | 4   | 5   | -- | --          |
|            | Ca(ICC2/PI489777)SNP_32105 | 1074 | C | T | 23  | 8   | -- | --          |
|            | Ca(ICC2/PI489777)SNP_32106 | 1426 | G | A | 6   | 8   | -- | --          |
| CakTC28679 | Ca(ICC2/PI489777)SNP_32107 | 123  | G | T | 3   | 5   | -- | --          |
|            | Ca(ICC2/PI489777)SNP_32108 | 162  | A | T | 3   | 8   | -- | --          |
| CakTC40337 | Ca(ICC2/PI489777)SNP_32109 | 593  | G | T | 21  | 17  | -- | --          |
|            | Ca(ICC2/PI489777)SNP_32110 | 680  | T | A | 16  | 12  | -- | --          |
|            | Ca(ICC2/PI489777)SNP_32111 | 776  | C | T | 14  | 13  | -- | --          |

|            |                            |      |   |   |     |    |        |      |
|------------|----------------------------|------|---|---|-----|----|--------|------|
|            | Ca(ICC2/PI489777)SNP_32112 | 803  | C | T | 16  | 12 | --     | --   |
|            | Ca(ICC2/PI489777)SNP_32113 | 1010 | G | A | 19  | 14 | --     | --   |
|            | Ca(ICC2/PI489777)SNP_32114 | 1250 | T | C | 15  | 17 | --     | --   |
|            | Ca(ICC2/PI489777)SNP_32115 | 1640 | C | T | 14  | 13 | --     | --   |
|            | Ca(ICC2/PI489777)SNP_32116 | 1718 | C | T | 9   | 8  | --     | --   |
| CakTC10291 | Ca(ICC2/PI489777)SNP_32117 | 845  | T | G | 8   | 6  | --     | --   |
| CakTC37805 | Ca(ICC2/PI489777)SNP_32118 | 373  | C | T | 4   | 4  | --     | DBP  |
| CakTC11646 | Ca(ICC2/PI489777)SNP_32119 | 263  | G | A | 224 | 58 | --     | --   |
|            | Ca(ICC2/PI489777)SNP_32120 | 366  | T | C | 267 | 64 | --     | --   |
|            | Ca(ICC2/PI489777)SNP_32121 | 565  | T | C | 245 | 69 | --     | --   |
|            | Ca(ICC2/PI489777)SNP_32122 | 737  | T | A | 77  | 41 | --     | --   |
| CakTC43151 | Ca(ICC2/PI489777)SNP_32123 | 91   | T | C | 7   | 8  | --     | --   |
|            | Ca(ICC2/PI489777)SNP_32124 | 94   | T | C | 6   | 7  | --     | --   |
|            | Ca(ICC2/PI489777)SNP_32125 | 429  | G | T | 34  | 19 | --     | --   |
|            | Ca(ICC2/PI489777)SNP_32126 | 546  | C | G | 47  | 14 | --     | --   |
|            | Ca(ICC2/PI489777)SNP_32127 | 889  | G | A | 8   | 4  | --     | --   |
| CakTC35144 | Ca(ICC2/PI489777)SNP_32128 | 201  | T | C | 8   | 3  | --     | --   |
|            | Ca(ICC2/PI489777)SNP_32129 | 772  | C | T | 5   | 5  | --     | --   |
|            | Ca(ICC2/PI489777)SNP_32130 | 868  | T | G | 9   | 5  | --     | --   |
|            | Ca(ICC2/PI489777)SNP_32131 | 946  | G | C | 11  | 5  | --     | --   |
|            | Ca(ICC2/PI489777)SNP_32132 | 1035 | C | A | 11  | 5  | --     | --   |
|            | Ca(ICC2/PI489777)SNP_32133 | 1098 | C | T | 13  | 7  | --     | --   |
|            | Ca(ICC2/PI489777)SNP_32134 | 1145 | G | A | 14  | 6  | --     | --   |
|            | Ca(ICC2/PI489777)SNP_32135 | 1159 | T | G | 14  | 6  | --     | --   |
|            | Ca(ICC2/PI489777)SNP_32136 | 1318 | A | G | 11  | 4  | --     | --   |
|            | Ca(ICC2/PI489777)SNP_32137 | 1471 | C | A | 11  | 6  | --     | --   |
|            | Ca(ICC2/PI489777)SNP_32138 | 1810 | A | T | 13  | 3  | --     | --   |
|            | Ca(ICC2/PI489777)SNP_32139 | 1993 | G | A | 16  | 10 | --     | --   |
|            | Ca(ICC2/PI489777)SNP_32140 | 3202 | T | C | 13  | 3  | --     | --   |
|            | Ca(ICC2/PI489777)SNP_32141 | 3234 | T | C | 12  | 3  | --     | --   |
| CakTC38366 | Ca(ICC2/PI489777)SNP_32142 | 545  | C | T | 48  | 29 | --     | --   |
|            | Ca(ICC2/PI489777)SNP_32143 | 885  | G | A | 36  | 24 | --     | --   |
|            | Ca(ICC2/PI489777)SNP_32144 | 953  | T | C | 38  | 24 | --     | --   |
|            | Ca(ICC2/PI489777)SNP_32145 | 1064 | G | C | 18  | 13 | --     | --   |
|            | Ca(ICC2/PI489777)SNP_32146 | 1093 | C | G | 4   | 3  | --     | --   |
| CakTC24202 | Ca(ICC2/PI489777)SNP_32147 | 417  | G | A | 24  | 5  | Shoot  | --   |
|            | Ca(ICC2/PI489777)SNP_32148 | 888  | G | A | 43  | 12 | Shoot  | --   |
|            | Ca(ICC2/PI489777)SNP_32149 | 999  | C | T | 43  | 12 | Shoot  | --   |
|            | Ca(ICC2/PI489777)SNP_32150 | 1806 | T | C | 11  | 7  | Shoot  | --   |
| CakTC01661 | Ca(ICC2/PI489777)SNP_32151 | 166  | G | A | 9   | 16 | --     | --   |
|            | Ca(ICC2/PI489777)SNP_32152 | 170  | A | C | 9   | 16 | --     | --   |
|            | Ca(ICC2/PI489777)SNP_32153 | 404  | T | A | 12  | 15 | --     | --   |
|            | Ca(ICC2/PI489777)SNP_32154 | 433  | C | G | 11  | 14 | --     | --   |
| CakTC24997 | Ca(ICC2/PI489777)SNP_32155 | 710  | A | C | 7   | 9  | --     | --   |
|            | Ca(ICC2/PI489777)SNP_32156 | 779  | C | T | 5   | 7  | --     | --   |
|            | Ca(ICC2/PI489777)SNP_32157 | 1129 | A | G | 15  | 14 | --     | --   |
| CakTC12149 | Ca(ICC2/PI489777)SNP_32158 | 945  | A | C | 27  | 27 | --     | --   |
| CakTC32099 | Ca(ICC2/PI489777)SNP_32159 | 1041 | G | C | 8   | 5  | Flower | bud  |
|            | Ca(ICC2/PI489777)SNP_32160 | 1476 | T | C | 12  | 3  | Flower | bud  |
| CakTC32270 | Ca(ICC2/PI489777)SNP_32161 | 443  | C | T | 12  | 11 | --     | --   |
|            | Ca(ICC2/PI489777)SNP_32162 | 650  | T | A | 8   | 8  | --     | --   |
|            | Ca(ICC2/PI489777)SNP_32163 | 751  | T | C | 6   | 10 | --     | --   |
|            | Ca(ICC2/PI489777)SNP_32164 | 794  | G | A | 8   | 9  | --     | --   |
|            | Ca(ICC2/PI489777)SNP_32165 | 1481 | G | A | 12  | 4  | --     | --   |
| CakTC22344 | Ca(ICC2/PI489777)SNP_32166 | 136  | A | C | 9   | 3  | --     | --   |
|            | Ca(ICC2/PI489777)SNP_32167 | 146  | C | T | 10  | 3  | --     | --   |
|            | Ca(ICC2/PI489777)SNP_32168 | 150  | C | A | 10  | 3  | --     | --   |
|            | Ca(ICC2/PI489777)SNP_32169 | 207  | T | C | 8   | 3  | --     | --   |
|            | Ca(ICC2/PI489777)SNP_32170 | 209  | G | A | 11  | 3  | --     | --   |
|            | Ca(ICC2/PI489777)SNP_32171 | 225  | A | C | 12  | 3  | --     | --   |
|            | Ca(ICC2/PI489777)SNP_32172 | 269  | G | A | 16  | 3  | --     | --   |
|            | Ca(ICC2/PI489777)SNP_32173 | 347  | C | T | 17  | 3  | --     | --   |
| CakTC22449 | Ca(ICC2/PI489777)SNP_32174 | 1690 | C | T | 9   | 4  | Mature | Leaf |
|            | Ca(ICC2/PI489777)SNP_32175 | 2682 | T | A | 8   | 4  | Mature | Leaf |
|            | Ca(ICC2/PI489777)SNP_32176 | 5773 | A | G | 3   | 4  | Mature | Leaf |
| CakTC32771 | Ca(ICC2/PI489777)SNP_32177 | 1087 | A | C | 13  | 6  | --     | --   |
| CakTC31911 | Ca(ICC2/PI489777)SNP_32178 | 1673 | T | C | 6   | 4  | Flower | bud  |
|            | Ca(ICC2/PI489777)SNP_32179 | 1679 | G | T | 7   | 4  | Flower | bud  |
|            | Ca(ICC2/PI489777)SNP_32180 | 1711 | T | G | 5   | 6  | Flower | bud  |
|            | Ca(ICC2/PI489777)SNP_32181 | 1805 | A | T | 8   | 9  | Flower | bud  |
| CakTC37213 | Ca(ICC2/PI489777)SNP_32182 | 111  | A | G | 4   | 3  | --     | --   |
| CakTC28569 | Ca(ICC2/PI489777)SNP_32183 | 998  | G | T | 3   | 8  | --     | --   |
|            | Ca(ICC2/PI489777)SNP_32184 | 1183 | A | G | 3   | 8  | --     | --   |
| CakTC31725 | Ca(ICC2/PI489777)SNP_32185 | 440  | A | G | 13  | 11 | Flower | bud  |

|            |                            |      |   |   |    |    |    |             |
|------------|----------------------------|------|---|---|----|----|----|-------------|
| CakTC10963 | Ca(ICC2/PI489777)SNP_32186 | 652  | A | G | 7  | 3  | -- | --          |
|            | Ca(ICC2/PI489777)SNP_32187 | 699  | A | G | 5  | 3  | -- | --          |
|            | Ca(ICC2/PI489777)SNP_32188 | 741  | G | C | 4  | 3  | -- | --          |
|            | Ca(ICC2/PI489777)SNP_32189 | 850  | A | T | 8  | 3  | -- | --          |
|            | Ca(ICC2/PI489777)SNP_32190 | 959  | G | A | 8  | 5  | -- | --          |
|            | Ca(ICC2/PI489777)SNP_32191 | 1057 | C | G | 6  | 4  | -- | --          |
|            | Ca(ICC2/PI489777)SNP_32192 | 1112 | G | T | 7  | 4  | -- | --          |
|            | Ca(ICC2/PI489777)SNP_32193 | 1223 | T | C | 4  | 3  | -- | --          |
|            | Ca(ICC2/PI489777)SNP_32194 | 1231 | G | A | 5  | 4  | -- | --          |
| CakTC37685 | Ca(ICC2/PI489777)SNP_32195 | 1186 | T | C | 7  | 6  | -- | --          |
| CakTC37638 | Ca(ICC2/PI489777)SNP_32196 | 1171 | G | A | 6  | 7  | -- | --          |
|            | Ca(ICC2/PI489777)SNP_32197 | 1562 | G | A | 10 | 6  | -- | --          |
|            | Ca(ICC2/PI489777)SNP_32198 | 1603 | T | C | 4  | 4  | -- | --          |
| CakTC31656 | Ca(ICC2/PI489777)SNP_32199 | 232  | A | G | 7  | 3  | -- | --          |
|            | Ca(ICC2/PI489777)SNP_32200 | 956  | C | T | 11 | 10 | -- | --          |
|            | Ca(ICC2/PI489777)SNP_32201 | 1049 | C | T | 12 | 10 | -- | --          |
| CakTC38330 | Ca(ICC2/PI489777)SNP_32202 | 359  | T | A | 6  | 5  | -- | --          |
|            | Ca(ICC2/PI489777)SNP_32203 | 361  | T | C | 6  | 6  | -- | --          |
|            | Ca(ICC2/PI489777)SNP_32204 | 517  | A | G | 4  | 6  | -- | --          |
|            | Ca(ICC2/PI489777)SNP_32205 | 1012 | C | T | 4  | 5  | -- | --          |
| CakTC10732 | Ca(ICC2/PI489777)SNP_32206 | 1135 | C | A | 32 | 8  | -- | --          |
|            | Ca(ICC2/PI489777)SNP_32207 | 1480 | A | G | 23 | 7  | -- | --          |
|            | Ca(ICC2/PI489777)SNP_32208 | 1680 | C | A | 18 | 10 | -- | --          |
|            | Ca(ICC2/PI489777)SNP_32209 | 1681 | G | T | 18 | 10 | -- | --          |
| CakTC11749 | Ca(ICC2/PI489777)SNP_32210 | 211  | C | T | 4  | 6  | -- | --          |
| CakTC28404 | Ca(ICC2/PI489777)SNP_32211 | 530  | C | G | 71 | 39 | -- | --          |
| CakTC39743 | Ca(ICC2/PI489777)SNP_32212 | 100  | C | T | 13 | 4  | -- | --          |
|            | Ca(ICC2/PI489777)SNP_32213 | 122  | A | G | 14 | 7  | -- | --          |
|            | Ca(ICC2/PI489777)SNP_32214 | 142  | T | C | 14 | 6  | -- | --          |
|            | Ca(ICC2/PI489777)SNP_32215 | 324  | A | G | 24 | 14 | -- | --          |
|            | Ca(ICC2/PI489777)SNP_32216 | 479  | G | T | 28 | 13 | -- | --          |
|            | Ca(ICC2/PI489777)SNP_32217 | 838  | G | T | 36 | 14 | -- | --          |
|            | Ca(ICC2/PI489777)SNP_32218 | 839  | C | T | 36 | 15 | -- | --          |
|            | Ca(ICC2/PI489777)SNP_32219 | 875  | T | G | 32 | 15 | -- | --          |
|            | Ca(ICC2/PI489777)SNP_32220 | 1034 | G | C | 29 | 11 | -- | --          |
| CakTC31292 | Ca(ICC2/PI489777)SNP_32221 | 158  | C | T | 69 | 7  | -- | --          |
| CakTC09561 | Ca(ICC2/PI489777)SNP_32222 | 3112 | T | C | 11 | 3  | -- | --          |
|            | Ca(ICC2/PI489777)SNP_32223 | 3133 | A | G | 11 | 3  | -- | --          |
| CakTC41694 | Ca(ICC2/PI489777)SNP_32224 | 820  | G | T | 15 | 9  | -- | --          |
|            | Ca(ICC2/PI489777)SNP_32225 | 976  | G | C | 15 | 9  | -- | --          |
| CakTC38097 | Ca(ICC2/PI489777)SNP_32226 | 639  | G | A | 18 | 6  | -- | --          |
|            | Ca(ICC2/PI489777)SNP_32227 | 965  | T | A | 18 | 3  | -- | --          |
| CakTC22319 | Ca(ICC2/PI489777)SNP_32228 | 586  | G | A | 31 | 9  | -- | --          |
|            | Ca(ICC2/PI489777)SNP_32229 | 1681 | C | T | 32 | 7  | -- | --          |
|            | Ca(ICC2/PI489777)SNP_32230 | 1742 | C | T | 25 | 3  | -- | --          |
| CakTC34225 | Ca(ICC2/PI489777)SNP_32231 | 493  | A | G | 6  | 24 | -- | --          |
|            | Ca(ICC2/PI489777)SNP_32232 | 1204 | G | A | 46 | 36 | -- | --          |
|            | Ca(ICC2/PI489777)SNP_32233 | 1372 | C | T | 45 | 48 | -- | --          |
|            | Ca(ICC2/PI489777)SNP_32234 | 1411 | T | C | 44 | 49 | -- | --          |
|            | Ca(ICC2/PI489777)SNP_32235 | 1414 | C | T | 45 | 49 | -- | --          |
|            | Ca(ICC2/PI489777)SNP_32236 | 2062 | A | G | 13 | 6  | -- | --          |
|            | Ca(ICC2/PI489777)SNP_32237 | 2067 | A | G | 13 | 6  | -- | --          |
| CakTC33990 | Ca(ICC2/PI489777)SNP_32238 | 86   | A | T | 3  | 4  | -- | --          |
|            | Ca(ICC2/PI489777)SNP_32239 | 112  | C | T | 5  | 4  | -- | --          |
|            | Ca(ICC2/PI489777)SNP_32240 | 199  | C | G | 29 | 60 | -- | --          |
|            | Ca(ICC2/PI489777)SNP_32241 | 529  | G | T | 12 | 32 | -- | --          |
| CakTC24298 | Ca(ICC2/PI489777)SNP_32242 | 658  | G | A | 52 | 12 | -- | MYB-related |
| CakTC25153 | Ca(ICC2/PI489777)SNP_32243 | 207  | A | G | 11 | 10 | -- | --          |
|            | Ca(ICC2/PI489777)SNP_32244 | 241  | A | C | 14 | 14 | -- | --          |
|            | Ca(ICC2/PI489777)SNP_32245 | 249  | T | C | 14 | 18 | -- | --          |
|            | Ca(ICC2/PI489777)SNP_32246 | 267  | T | G | 14 | 15 | -- | --          |
|            | Ca(ICC2/PI489777)SNP_32247 | 488  | T | A | 15 | 28 | -- | --          |
|            | Ca(ICC2/PI489777)SNP_32248 | 863  | A | G | 6  | 3  | -- | --          |
| CakTC26172 | Ca(ICC2/PI489777)SNP_32249 | 577  | G | A | 20 | 14 | -- | --          |
|            | Ca(ICC2/PI489777)SNP_32250 | 665  | A | G | 27 | 14 | -- | --          |
|            | Ca(ICC2/PI489777)SNP_32251 | 1941 | A | C | 28 | 16 | -- | --          |
|            | Ca(ICC2/PI489777)SNP_32252 | 1967 | A | G | 29 | 17 | -- | --          |
|            | Ca(ICC2/PI489777)SNP_32253 | 2038 | T | A | 35 | 18 | -- | --          |
|            | Ca(ICC2/PI489777)SNP_32254 | 2356 | G | A | 24 | 55 | -- | --          |
|            | Ca(ICC2/PI489777)SNP_32255 | 2404 | T | C | 24 | 63 | -- | --          |
|            | Ca(ICC2/PI489777)SNP_32256 | 2416 | G | A | 28 | 64 | -- | --          |
|            | Ca(ICC2/PI489777)SNP_32257 | 2850 | A | G | 16 | 14 | -- | --          |
|            | Ca(ICC2/PI489777)SNP_32258 | 3226 | T | G | 23 | 11 | -- | --          |
|            | Ca(ICC2/PI489777)SNP_32259 | 3273 | A | G | 18 | 9  | -- | --          |

|            |                            |      |   |   |     |    |    |         |
|------------|----------------------------|------|---|---|-----|----|----|---------|
|            | Ca(ICC2/PI489777)SNP_32260 | 3365 | T | C | 10  | 6  | -- | --      |
|            | Ca(ICC2/PI489777)SNP_32261 | 3387 | C | T | 5   | 5  | -- | --      |
| CakTC37764 | Ca(ICC2/PI489777)SNP_32262 | 90   | G | T | 8   | 8  | -- | --      |
|            | Ca(ICC2/PI489777)SNP_32263 | 553  | C | T | 40  | 10 | -- | --      |
| CakTC35027 | Ca(ICC2/PI489777)SNP_32264 | 701  | C | T | 4   | 4  | -- | SET     |
|            | Ca(ICC2/PI489777)SNP_32265 | 714  | T | C | 4   | 4  | -- | SET     |
|            | Ca(ICC2/PI489777)SNP_32266 | 815  | T | C | 4   | 4  | -- | SET     |
|            | Ca(ICC2/PI489777)SNP_32267 | 1128 | G | A | 3   | 10 | -- | SET     |
|            | Ca(ICC2/PI489777)SNP_32268 | 1593 | T | C | 5   | 3  | -- | SET     |
|            | Ca(ICC2/PI489777)SNP_32269 | 1827 | C | T | 6   | 3  | -- | SET     |
| CakTC29475 | Ca(ICC2/PI489777)SNP_32270 | 467  | G | C | 15  | 12 | -- | --      |
|            | Ca(ICC2/PI489777)SNP_32271 | 552  | C | T | 13  | 11 | -- | --      |
|            | Ca(ICC2/PI489777)SNP_32272 | 557  | C | T | 13  | 10 | -- | --      |
|            | Ca(ICC2/PI489777)SNP_32273 | 1313 | C | G | 11  | 5  | -- | --      |
|            | Ca(ICC2/PI489777)SNP_32274 | 1388 | T | C | 8   | 3  | -- | --      |
|            | Ca(ICC2/PI489777)SNP_32275 | 2417 | A | C | 4   | 9  | -- | --      |
|            | Ca(ICC2/PI489777)SNP_32276 | 2418 | C | A | 4   | 9  | -- | --      |
| CakTC33087 | Ca(ICC2/PI489777)SNP_32277 | 768  | C | A | 16  | 7  | -- | --      |
|            | Ca(ICC2/PI489777)SNP_32278 | 787  | A | G | 16  | 8  | -- | --      |
|            | Ca(ICC2/PI489777)SNP_32279 | 1033 | T | C | 6   | 5  | -- | --      |
|            | Ca(ICC2/PI489777)SNP_32280 | 2214 | A | G | 13  | 11 | -- | --      |
| CakTC24252 | Ca(ICC2/PI489777)SNP_32281 | 327  | G | A | 48  | 21 | -- | --      |
|            | Ca(ICC2/PI489777)SNP_32282 | 458  | G | C | 60  | 31 | -- | --      |
|            | Ca(ICC2/PI489777)SNP_32283 | 1256 | T | A | 46  | 28 | -- | --      |
|            | Ca(ICC2/PI489777)SNP_32284 | 1283 | A | G | 56  | 28 | -- | --      |
|            | Ca(ICC2/PI489777)SNP_32285 | 1319 | A | G | 56  | 27 | -- | --      |
|            | Ca(ICC2/PI489777)SNP_32286 | 1481 | C | T | 63  | 22 | -- | --      |
|            | Ca(ICC2/PI489777)SNP_32287 | 1772 | T | C | 50  | 19 | -- | --      |
|            | Ca(ICC2/PI489777)SNP_32288 | 2126 | C | T | 32  | 10 | -- | --      |
|            | Ca(ICC2/PI489777)SNP_32289 | 2166 | C | T | 29  | 9  | -- | --      |
| CakTC32878 | Ca(ICC2/PI489777)SNP_32290 | 248  | A | G | 246 | 12 | -- | --      |
|            | Ca(ICC2/PI489777)SNP_32291 | 453  | T | A | 280 | 19 | -- | --      |
|            | Ca(ICC2/PI489777)SNP_32292 | 525  | T | A | 264 | 19 | -- | --      |
| CakTC32778 | Ca(ICC2/PI489777)SNP_32293 | 152  | A | G | 4   | 5  | -- | --      |
| CakTC29445 | Ca(ICC2/PI489777)SNP_32294 | 210  | T | C | 8   | 3  | -- | --      |
|            | Ca(ICC2/PI489777)SNP_32295 | 530  | A | G | 15  | 9  | -- | --      |
|            | Ca(ICC2/PI489777)SNP_32296 | 885  | A | G | 5   | 9  | -- | --      |
| CakTC26310 | Ca(ICC2/PI489777)SNP_32297 | 1133 | G | A | 38  | 22 | -- | bZIP    |
|            | Ca(ICC2/PI489777)SNP_32298 | 1298 | A | G | 33  | 15 | -- | bZIP    |
|            | Ca(ICC2/PI489777)SNP_32299 | 1361 | A | T | 29  | 16 | -- | bZIP    |
|            | Ca(ICC2/PI489777)SNP_32300 | 1380 | C | T | 26  | 8  | -- | bZIP    |
| CakTC42794 | Ca(ICC2/PI489777)SNP_32301 | 245  | A | C | 21  | 5  | -- | --      |
|            | Ca(ICC2/PI489777)SNP_32302 | 326  | A | G | 24  | 6  | -- | --      |
|            | Ca(ICC2/PI489777)SNP_32303 | 399  | G | C | 23  | 7  | -- | --      |
|            | Ca(ICC2/PI489777)SNP_32304 | 497  | T | C | 24  | 7  | -- | --      |
|            | Ca(ICC2/PI489777)SNP_32305 | 521  | C | T | 23  | 7  | -- | --      |
|            | Ca(ICC2/PI489777)SNP_32306 | 653  | A | G | 24  | 5  | -- | --      |
| CakTC32366 | Ca(ICC2/PI489777)SNP_32307 | 247  | A | G | 5   | 18 | -- | --      |
|            | Ca(ICC2/PI489777)SNP_32308 | 295  | G | A | 8   | 18 | -- | --      |
|            | Ca(ICC2/PI489777)SNP_32309 | 361  | G | A | 11  | 20 | -- | --      |
|            | Ca(ICC2/PI489777)SNP_32310 | 403  | A | G | 11  | 18 | -- | --      |
|            | Ca(ICC2/PI489777)SNP_32311 | 574  | A | G | 19  | 25 | -- | --      |
|            | Ca(ICC2/PI489777)SNP_32312 | 937  | G | A | 11  | 17 | -- | --      |
|            | Ca(ICC2/PI489777)SNP_32313 | 940  | G | C | 11  | 17 | -- | --      |
|            | Ca(ICC2/PI489777)SNP_32314 | 976  | G | T | 10  | 16 | -- | --      |
|            | Ca(ICC2/PI489777)SNP_32315 | 1054 | G | C | 7   | 12 | -- | --      |
|            | Ca(ICC2/PI489777)SNP_32316 | 1408 | T | C | 14  | 9  | -- | --      |
|            | Ca(ICC2/PI489777)SNP_32317 | 1447 | T | G | 15  | 12 | -- | --      |
|            | Ca(ICC2/PI489777)SNP_32318 | 2602 | T | C | 6   | 13 | -- | --      |
|            | Ca(ICC2/PI489777)SNP_32319 | 2725 | A | G | 8   | 4  | -- | --      |
|            | Ca(ICC2/PI489777)SNP_32320 | 2776 | T | C | 10  | 10 | -- | --      |
|            | Ca(ICC2/PI489777)SNP_32321 | 2824 | G | A | 8   | 10 | -- | --      |
| CakTC42826 | Ca(ICC2/PI489777)SNP_32322 | 285  | C | T | 10  | 4  | -- | --      |
|            | Ca(ICC2/PI489777)SNP_32323 | 353  | C | T | 12  | 5  | -- | --      |
|            | Ca(ICC2/PI489777)SNP_32324 | 437  | G | A | 10  | 4  | -- | --      |
|            | Ca(ICC2/PI489777)SNP_32325 | 545  | T | C | 9   | 3  | -- | --      |
| CakTC37874 | Ca(ICC2/PI489777)SNP_32326 | 50   | T | G | 3   | 3  | -- | --      |
|            | Ca(ICC2/PI489777)SNP_32327 | 61   | C | T | 7   | 5  | -- | --      |
| CakTC33128 | Ca(ICC2/PI489777)SNP_32328 | 25   | T | A | 3   | 4  | -- | --      |
|            | Ca(ICC2/PI489777)SNP_32329 | 405  | G | A | 14  | 4  | -- | --      |
|            | Ca(ICC2/PI489777)SNP_32330 | 1652 | A | T | 8   | 3  | -- | --      |
| CakTC10681 | Ca(ICC2/PI489777)SNP_32331 | 598  | G | A | 13  | 5  | -- | BBR/BPC |
| CakTC29459 | Ca(ICC2/PI489777)SNP_32332 | 369  | A | G | 30  | 10 | -- | --      |
| CakTC25556 | Ca(ICC2/PI489777)SNP_32333 | 2731 | G | A | 8   | 8  | -- | SNF2    |

|            |                            |      |   |   |    |    |           |      |
|------------|----------------------------|------|---|---|----|----|-----------|------|
| CakTC09881 | Ca(ICC2/PI489777)SNP_32334 | 884  | C | A | 4  | 4  | --        | --   |
| CakTC39184 | Ca(ICC2/PI489777)SNP_32335 | 272  | C | G | 4  | 3  | --        | --   |
|            | Ca(ICC2/PI489777)SNP_32336 | 504  | A | G | 8  | 8  | --        | --   |
|            | Ca(ICC2/PI489777)SNP_32337 | 516  | A | G | 8  | 8  | --        | --   |
|            | Ca(ICC2/PI489777)SNP_32338 | 741  | C | T | 9  | 8  | --        | --   |
| CakTC04147 | Ca(ICC2/PI489777)SNP_32339 | 379  | G | A | 33 | 30 | --        | --   |
|            | Ca(ICC2/PI489777)SNP_32340 | 586  | G | A | 34 | 26 | --        | --   |
|            | Ca(ICC2/PI489777)SNP_32341 | 985  | T | G | 17 | 14 | --        | --   |
|            | Ca(ICC2/PI489777)SNP_32342 | 1366 | T | A | 31 | 26 | --        | --   |
| CakTC18160 | Ca(ICC2/PI489777)SNP_32343 | 162  | A | G | 8  | 3  | --        | --   |
|            | Ca(ICC2/PI489777)SNP_32344 | 480  | C | A | 5  | 4  | --        | --   |
| CakTC22966 | Ca(ICC2/PI489777)SNP_32345 | 325  | C | T | 4  | 3  | --        | --   |
| CakTC32955 | Ca(ICC2/PI489777)SNP_32346 | 35   | C | T | 10 | 4  | Young_pod | --   |
|            | Ca(ICC2/PI489777)SNP_32347 | 39   | G | C | 10 | 4  | Young_pod | --   |
|            | Ca(ICC2/PI489777)SNP_32348 | 55   | G | A | 18 | 21 | Young_pod | --   |
|            | Ca(ICC2/PI489777)SNP_32349 | 104  | C | A | 32 | 19 | Young_pod | --   |
|            | Ca(ICC2/PI489777)SNP_32350 | 111  | C | T | 35 | 21 | Young_pod | --   |
|            | Ca(ICC2/PI489777)SNP_32351 | 171  | T | C | 52 | 21 | Young_pod | --   |
|            | Ca(ICC2/PI489777)SNP_32352 | 799  | A | G | 6  | 3  | Young_pod | --   |
| CakTC27600 | Ca(ICC2/PI489777)SNP_32353 | 574  | G | A | 3  | 4  | --        | SNF2 |
|            | Ca(ICC2/PI489777)SNP_32354 | 597  | G | A | 3  | 3  | --        | SNF2 |
|            | Ca(ICC2/PI489777)SNP_32355 | 1550 | T | C | 3  | 3  | --        | SNF2 |
|            | Ca(ICC2/PI489777)SNP_32356 | 1568 | T | G | 3  | 3  | --        | SNF2 |
|            | Ca(ICC2/PI489777)SNP_32357 | 1622 | C | T | 3  | 3  | --        | SNF2 |
| CakTC31764 | Ca(ICC2/PI489777)SNP_32358 | 963  | A | G | 4  | 5  | --        | --   |
|            | Ca(ICC2/PI489777)SNP_32359 | 1311 | G | A | 13 | 6  | --        | --   |
| CakTC08203 | Ca(ICC2/PI489777)SNP_32360 | 613  | C | T | 16 | 8  | --        | --   |
|            | Ca(ICC2/PI489777)SNP_32361 | 706  | T | A | 14 | 7  | --        | --   |
|            | Ca(ICC2/PI489777)SNP_32362 | 726  | C | G | 13 | 6  | --        | --   |
|            | Ca(ICC2/PI489777)SNP_32363 | 751  | C | T | 11 | 7  | --        | --   |
|            | Ca(ICC2/PI489777)SNP_32364 | 814  | G | A | 15 | 10 | --        | --   |
| CakTC32241 | Ca(ICC2/PI489777)SNP_32365 | 1098 | A | G | 12 | 15 | --        | --   |
|            | Ca(ICC2/PI489777)SNP_32366 | 1206 | G | A | 9  | 19 | --        | --   |
|            | Ca(ICC2/PI489777)SNP_32367 | 1353 | T | C | 13 | 21 | --        | --   |
|            | Ca(ICC2/PI489777)SNP_32368 | 1356 | G | A | 13 | 20 | --        | --   |
| CakTC11841 | Ca(ICC2/PI489777)SNP_32369 | 35   | T | C | 45 | 8  | Root      | --   |
| CakTC01921 | Ca(ICC2/PI489777)SNP_32370 | 820  | G | A | 10 | 7  | --        | --   |
|            | Ca(ICC2/PI489777)SNP_32371 | 823  | G | A | 10 | 8  | --        | --   |
|            | Ca(ICC2/PI489777)SNP_32372 | 883  | A | G | 9  | 8  | --        | --   |
|            | Ca(ICC2/PI489777)SNP_32373 | 1004 | T | C | 8  | 9  | --        | --   |
|            | Ca(ICC2/PI489777)SNP_32374 | 1162 | G | A | 3  | 8  | --        | --   |
|            | Ca(ICC2/PI489777)SNP_32375 | 1186 | C | T | 3  | 7  | --        | --   |
|            | Ca(ICC2/PI489777)SNP_32376 | 1301 | G | C | 4  | 9  | --        | --   |
|            | Ca(ICC2/PI489777)SNP_32377 | 1303 | C | T | 4  | 9  | --        | --   |
|            | Ca(ICC2/PI489777)SNP_32378 | 1354 | A | G | 4  | 6  | --        | --   |
| CakTC40990 | Ca(ICC2/PI489777)SNP_32379 | 964  | G | A | 4  | 6  | --        | --   |
| CakTC11385 | Ca(ICC2/PI489777)SNP_32380 | 123  | A | C | 4  | 6  | --        | --   |
|            | Ca(ICC2/PI489777)SNP_32381 | 547  | C | T | 3  | 8  | --        | --   |
|            | Ca(ICC2/PI489777)SNP_32382 | 751  | G | A | 6  | 3  | --        | --   |
|            | Ca(ICC2/PI489777)SNP_32383 | 844  | G | A | 6  | 3  | --        | --   |
|            | Ca(ICC2/PI489777)SNP_32384 | 1205 | C | T | 3  | 3  | --        | --   |
| CakTC39608 | Ca(ICC2/PI489777)SNP_32385 | 419  | G | C | 10 | 11 | --        | --   |
| CakTC39993 | Ca(ICC2/PI489777)SNP_32386 | 579  | T | G | 19 | 6  | --        | --   |
|            | Ca(ICC2/PI489777)SNP_32387 | 584  | A | G | 17 | 6  | --        | --   |
| CakTC40084 | Ca(ICC2/PI489777)SNP_32388 | 728  | T | G | 4  | 8  | --        | --   |
|            | Ca(ICC2/PI489777)SNP_32389 | 1000 | T | C | 6  | 7  | --        | --   |
| CakTC02493 | Ca(ICC2/PI489777)SNP_32390 | 153  | C | T | 3  | 3  | --        | --   |
|            | Ca(ICC2/PI489777)SNP_32391 | 190  | G | A | 4  | 3  | --        | --   |
|            | Ca(ICC2/PI489777)SNP_32392 | 442  | C | T | 11 | 5  | --        | --   |
|            | Ca(ICC2/PI489777)SNP_32393 | 586  | T | C | 16 | 7  | --        | --   |
|            | Ca(ICC2/PI489777)SNP_32394 | 628  | C | A | 19 | 7  | --        | --   |
|            | Ca(ICC2/PI489777)SNP_32395 | 634  | T | C | 18 | 4  | --        | --   |
|            | Ca(ICC2/PI489777)SNP_32396 | 821  | G | A | 17 | 6  | --        | --   |
|            | Ca(ICC2/PI489777)SNP_32397 | 949  | G | C | 17 | 5  | --        | --   |
|            | Ca(ICC2/PI489777)SNP_32398 | 1288 | C | A | 14 | 6  | --        | --   |
|            | Ca(ICC2/PI489777)SNP_32399 | 1621 | G | A | 9  | 5  | --        | --   |
|            | Ca(ICC2/PI489777)SNP_32400 | 1877 | T | C | 13 | 8  | --        | --   |
|            | Ca(ICC2/PI489777)SNP_32401 | 1957 | G | A | 10 | 6  | --        | --   |
|            | Ca(ICC2/PI489777)SNP_32402 | 2039 | G | C | 8  | 7  | --        | --   |
|            | Ca(ICC2/PI489777)SNP_32403 | 2095 | G | A | 9  | 6  | --        | --   |
|            | Ca(ICC2/PI489777)SNP_32404 | 2175 | G | C | 6  | 6  | --        | --   |
|            | Ca(ICC2/PI489777)SNP_32405 | 2192 | A | G | 3  | 3  | --        | --   |
| CakTC42507 | Ca(ICC2/PI489777)SNP_32406 | 296  | T | G | 8  | 8  | --        | --   |
|            | Ca(ICC2/PI489777)SNP_32407 | 299  | T | A | 7  | 8  | --        | --   |

|            |                            |      |   |   |    |    |        |             |
|------------|----------------------------|------|---|---|----|----|--------|-------------|
|            | Ca(ICC2/PI489777)SNP_32408 | 441  | A | G | 9  | 9  | --     | --          |
|            | Ca(ICC2/PI489777)SNP_32409 | 445  | C | T | 9  | 8  | --     | --          |
|            | Ca(ICC2/PI489777)SNP_32410 | 460  | C | T | 8  | 6  | --     | --          |
|            | Ca(ICC2/PI489777)SNP_32411 | 514  | A | G | 5  | 8  | --     | --          |
|            | Ca(ICC2/PI489777)SNP_32412 | 631  | A | C | 4  | 7  | --     | --          |
|            | Ca(ICC2/PI489777)SNP_32413 | 648  | A | T | 6  | 6  | --     | --          |
|            | Ca(ICC2/PI489777)SNP_32414 | 741  | A | G | 7  | 7  | --     | --          |
| CakTC37408 | Ca(ICC2/PI489777)SNP_32415 | 905  | C | T | 6  | 4  | --     | --          |
|            | Ca(ICC2/PI489777)SNP_32416 | 964  | A | T | 4  | 4  | --     | --          |
| CakTC26106 | Ca(ICC2/PI489777)SNP_32417 | 247  | T | C | 6  | 5  | --     | --          |
|            | Ca(ICC2/PI489777)SNP_32418 | 269  | A | G | 6  | 5  | --     | --          |
|            | Ca(ICC2/PI489777)SNP_32419 | 279  | C | G | 7  | 5  | --     | --          |
|            | Ca(ICC2/PI489777)SNP_32420 | 667  | T | A | 10 | 11 | --     | --          |
| CakTC32738 | Ca(ICC2/PI489777)SNP_32421 | 239  | C | T | 24 | 13 | --     | --          |
| CakTC40073 | Ca(ICC2/PI489777)SNP_32422 | 453  | A | G | 20 | 6  | --     | Bromodomain |
|            | Ca(ICC2/PI489777)SNP_32423 | 698  | C | G | 11 | 6  | --     | Bromodomain |
|            | Ca(ICC2/PI489777)SNP_32424 | 809  | A | C | 10 | 8  | --     | Bromodomain |
| CakTC40132 | Ca(ICC2/PI489777)SNP_32425 | 798  | A | G | 41 | 5  | --     | --          |
|            | Ca(ICC2/PI489777)SNP_32426 | 1455 | G | C | 22 | 12 | --     | --          |
| CakTC31102 | Ca(ICC2/PI489777)SNP_32427 | 548  | G | A | 9  | 5  | --     | --          |
|            | Ca(ICC2/PI489777)SNP_32428 | 1136 | A | G | 31 | 6  | --     | --          |
|            | Ca(ICC2/PI489777)SNP_32429 | 1169 | T | A | 33 | 6  | --     | --          |
|            | Ca(ICC2/PI489777)SNP_32430 | 1511 | T | C | 15 | 3  | --     | --          |
| CakTC28644 | Ca(ICC2/PI489777)SNP_32431 | 481  | C | T | 9  | 6  | --     | CCAAT       |
| CakTC27477 | Ca(ICC2/PI489777)SNP_32432 | 209  | T | C | 27 | 14 | --     | --          |
|            | Ca(ICC2/PI489777)SNP_32433 | 419  | T | C | 28 | 16 | --     | --          |
|            | Ca(ICC2/PI489777)SNP_32434 | 560  | C | T | 23 | 16 | --     | --          |
|            | Ca(ICC2/PI489777)SNP_32435 | 832  | C | A | 13 | 6  | --     | --          |
|            | Ca(ICC2/PI489777)SNP_32436 | 959  | C | A | 14 | 5  | --     | --          |
|            | Ca(ICC2/PI489777)SNP_32437 | 980  | G | T | 16 | 8  | --     | --          |
|            | Ca(ICC2/PI489777)SNP_32438 | 1355 | T | G | 16 | 11 | --     | --          |
|            | Ca(ICC2/PI489777)SNP_32439 | 1365 | A | C | 15 | 9  | --     | --          |
|            | Ca(ICC2/PI489777)SNP_32440 | 1439 | G | T | 18 | 10 | --     | --          |
|            | Ca(ICC2/PI489777)SNP_32441 | 1768 | A | C | 23 | 10 | --     | --          |
|            | Ca(ICC2/PI489777)SNP_32442 | 1847 | A | C | 19 | 8  | --     | --          |
| CakTC36542 | Ca(ICC2/PI489777)SNP_32443 | 1338 | T | G | 61 | 29 | --     | --          |
|            | Ca(ICC2/PI489777)SNP_32444 | 1544 | T | C | 52 | 31 | --     | --          |
|            | Ca(ICC2/PI489777)SNP_32445 | 2609 | A | G | 32 | 15 | --     | --          |
| CakTC33222 | Ca(ICC2/PI489777)SNP_32446 | 400  | A | T | 10 | 5  | --     | --          |
|            | Ca(ICC2/PI489777)SNP_32447 | 1076 | C | T | 8  | 5  | --     | --          |
| CakTC34069 | Ca(ICC2/PI489777)SNP_32448 | 77   | G | A | 16 | 4  | --     | --          |
|            | Ca(ICC2/PI489777)SNP_32449 | 218  | A | G | 29 | 4  | --     | --          |
|            | Ca(ICC2/PI489777)SNP_32450 | 283  | G | A | 30 | 4  | --     | --          |
|            | Ca(ICC2/PI489777)SNP_32451 | 313  | T | C | 28 | 4  | --     | --          |
| CakTC01576 | Ca(ICC2/PI489777)SNP_32452 | 521  | T | A | 4  | 3  | --     | --          |
|            | Ca(ICC2/PI489777)SNP_32453 | 589  | C | T | 4  | 3  | --     | --          |
| CakTC38339 | Ca(ICC2/PI489777)SNP_32454 | 498  | A | T | 11 | 20 | --     | --          |
|            | Ca(ICC2/PI489777)SNP_32455 | 804  | G | A | 4  | 4  | --     | --          |
| CakTC38524 | Ca(ICC2/PI489777)SNP_32456 | 98   | T | A | 8  | 13 | --     | --          |
|            | Ca(ICC2/PI489777)SNP_32457 | 665  | C | T | 10 | 10 | --     | --          |
|            | Ca(ICC2/PI489777)SNP_32458 | 1157 | G | A | 10 | 10 | --     | --          |
|            | Ca(ICC2/PI489777)SNP_32459 | 1439 | C | G | 7  | 5  | --     | --          |
| CakTC05927 | Ca(ICC2/PI489777)SNP_32460 | 210  | G | A | 7  | 3  | --     | MADS        |
| CakTC37290 | Ca(ICC2/PI489777)SNP_32461 | 871  | T | C | 8  | 6  | --     | --          |
|            | Ca(ICC2/PI489777)SNP_32462 | 885  | T | C | 9  | 6  | --     | --          |
|            | Ca(ICC2/PI489777)SNP_32463 | 886  | G | C | 8  | 6  | --     | --          |
| CakTC29280 | Ca(ICC2/PI489777)SNP_32464 | 501  | C | A | 5  | 3  | --     | --          |
| CakTC03093 | Ca(ICC2/PI489777)SNP_32465 | 340  | T | C | 4  | 4  | --     | --          |
| CakTC40006 | Ca(ICC2/PI489777)SNP_32466 | 898  | G | T | 46 | 17 | --     | TPR         |
|            | Ca(ICC2/PI489777)SNP_32467 | 1135 | C | T | 12 | 7  | --     | TPR         |
| CakTC29834 | Ca(ICC2/PI489777)SNP_32468 | 1060 | G | T | 3  | 5  | --     | --          |
|            | Ca(ICC2/PI489777)SNP_32469 | 1111 | C | A | 3  | 5  | --     | --          |
|            | Ca(ICC2/PI489777)SNP_32470 | 2903 | C | T | 7  | 3  | --     | --          |
| CakTC28687 | Ca(ICC2/PI489777)SNP_32471 | 476  | G | A | 17 | 9  | --     | WRKY        |
|            | Ca(ICC2/PI489777)SNP_32472 | 591  | G | A | 8  | 3  | --     | WRKY        |
|            | Ca(ICC2/PI489777)SNP_32473 | 1038 | A | C | 14 | 6  | --     | WRKY        |
|            | Ca(ICC2/PI489777)SNP_32474 | 1083 | C | T | 17 | 8  | --     | WRKY        |
| CakTC32551 | Ca(ICC2/PI489777)SNP_32475 | 472  | C | T | 9  | 4  | Flower | bud         |
|            | Ca(ICC2/PI489777)SNP_32476 | 708  | G | A | 5  | 5  | Flower | bud         |
| CakTC39356 | Ca(ICC2/PI489777)SNP_32477 | 799  | T | G | 83 | 22 | --     | --          |
|            | Ca(ICC2/PI489777)SNP_32478 | 1137 | T | G | 85 | 33 | --     | --          |
|            | Ca(ICC2/PI489777)SNP_32479 | 1144 | C | T | 83 | 29 | --     | --          |
| CakTC38626 | Ca(ICC2/PI489777)SNP_32480 | 1046 | C | G | 3  | 9  | --     | --          |
| CakTC28702 | Ca(ICC2/PI489777)SNP_32481 | 1678 | A | G | 10 | 6  | --     | --          |

|            |                            |      |   |   |    |    |        |              |
|------------|----------------------------|------|---|---|----|----|--------|--------------|
|            | Ca(ICC2/PI489777)SNP_32482 | 2484 | A | G | 10 | 3  | --     | --           |
|            | Ca(ICC2/PI489777)SNP_32483 | 2509 | A | G | 8  | 3  | --     | --           |
|            | Ca(ICC2/PI489777)SNP_32484 | 2546 | G | T | 8  | 3  | --     | --           |
|            | Ca(ICC2/PI489777)SNP_32485 | 2580 | A | G | 8  | 3  | --     | --           |
| CakTC13077 | Ca(ICC2/PI489777)SNP_32486 | 179  | G | A | 36 | 5  | --     | C2C2-CO-like |
|            | Ca(ICC2/PI489777)SNP_32487 | 213  | G | A | 43 | 7  | --     | C2C2-CO-like |
|            | Ca(ICC2/PI489777)SNP_32488 | 427  | T | A | 42 | 10 | --     | C2C2-CO-like |
| CakTC38433 | Ca(ICC2/PI489777)SNP_32489 | 995  | G | A | 3  | 4  | --     | --           |
| CakTC37303 | Ca(ICC2/PI489777)SNP_32490 | 472  | T | C | 5  | 10 | --     | --           |
|            | Ca(ICC2/PI489777)SNP_32491 | 1085 | T | C | 4  | 4  | --     | --           |
|            | Ca(ICC2/PI489777)SNP_32492 | 1203 | G | C | 5  | 3  | --     | --           |
| CakTC26052 | Ca(ICC2/PI489777)SNP_32493 | 416  | C | T | 59 | 46 | --     | --           |
|            | Ca(ICC2/PI489777)SNP_32494 | 733  | A | G | 15 | 20 | --     | --           |
| CakTC41165 | Ca(ICC2/PI489777)SNP_32495 | 493  | T | G | 23 | 14 | --     | --           |
|            | Ca(ICC2/PI489777)SNP_32496 | 682  | G | A | 7  | 4  | --     | --           |
| CakTC40038 | Ca(ICC2/PI489777)SNP_32497 | 938  | G | C | 18 | 12 | --     | --           |
|            | Ca(ICC2/PI489777)SNP_32498 | 1030 | A | T | 13 | 9  | --     | --           |
| CakTC11063 | Ca(ICC2/PI489777)SNP_32499 | 1000 | A | G | 4  | 5  | --     | --           |
|            | Ca(ICC2/PI489777)SNP_32500 | 1002 | C | T | 3  | 5  | --     | --           |
| CakTC39174 | Ca(ICC2/PI489777)SNP_32501 | 1305 | G | A | 9  | 3  | --     | --           |
| CakTC39337 | Ca(ICC2/PI489777)SNP_32502 | 138  | G | A | 8  | 5  | --     | --           |
|            | Ca(ICC2/PI489777)SNP_32503 | 541  | G | A | 12 | 4  | --     | --           |
|            | Ca(ICC2/PI489777)SNP_32504 | 829  | G | A | 13 | 7  | --     | --           |
|            | Ca(ICC2/PI489777)SNP_32505 | 1009 | A | G | 13 | 6  | --     | --           |
|            | Ca(ICC2/PI489777)SNP_32506 | 1138 | C | T | 15 | 5  | --     | --           |
| CakTC40422 | Ca(ICC2/PI489777)SNP_32507 | 454  | C | T | 10 | 8  | --     | --           |
|            | Ca(ICC2/PI489777)SNP_32508 | 664  | T | C | 5  | 9  | --     | --           |
| CakTC22492 | Ca(ICC2/PI489777)SNP_32509 | 3552 | C | T | 3  | 4  | Shoot  | --           |
| CakTC29561 | Ca(ICC2/PI489777)SNP_32510 | 715  | A | G | 4  | 3  | --     | --           |
| CakTC40449 | Ca(ICC2/PI489777)SNP_32511 | 307  | T | G | 5  | 5  | Flower | bud          |
|            | Ca(ICC2/PI489777)SNP_32512 | 1833 | G | A | 6  | 7  | Flower | bud          |
|            | Ca(ICC2/PI489777)SNP_32513 | 1970 | T | C | 11 | 12 | Flower | bud          |
|            | Ca(ICC2/PI489777)SNP_32514 | 2056 | T | G | 11 | 12 | Flower | bud          |
| CakTC32208 | Ca(ICC2/PI489777)SNP_32515 | 1093 | G | A | 7  | 3  | --     | --           |
| CakTC37171 | Ca(ICC2/PI489777)SNP_32516 | 163  | C | T | 4  | 4  | --     | --           |
|            | Ca(ICC2/PI489777)SNP_32517 | 880  | A | G | 10 | 10 | --     | --           |
| CakTC08042 | Ca(ICC2/PI489777)SNP_32518 | 2694 | G | A | 3  | 3  | --     | --           |
| CakTC24177 | Ca(ICC2/PI489777)SNP_32519 | 3690 | A | C | 8  | 3  | --     | --           |
| CakTC36091 | Ca(ICC2/PI489777)SNP_32520 | 817  | T | C | 6  | 3  | --     | --           |
|            | Ca(ICC2/PI489777)SNP_32521 | 933  | C | A | 5  | 6  | --     | --           |
|            | Ca(ICC2/PI489777)SNP_32522 | 2722 | A | T | 4  | 7  | --     | --           |
|            | Ca(ICC2/PI489777)SNP_32523 | 4534 | G | A | 3  | 10 | --     | --           |
| CakTC26111 | Ca(ICC2/PI489777)SNP_32524 | 3050 | A | T | 3  | 5  | --     | --           |
|            | Ca(ICC2/PI489777)SNP_32525 | 3139 | G | T | 3  | 5  | --     | --           |
|            | Ca(ICC2/PI489777)SNP_32526 | 3328 | T | C | 4  | 4  | --     | --           |
| CakTC32461 | Ca(ICC2/PI489777)SNP_32527 | 257  | T | A | 15 | 3  | --     | MYB          |
|            | Ca(ICC2/PI489777)SNP_32528 | 420  | T | C | 18 | 4  | --     | MYB          |
|            | Ca(ICC2/PI489777)SNP_32529 | 841  | C | T | 10 | 3  | --     | MYB          |
|            | Ca(ICC2/PI489777)SNP_32530 | 1486 | A | G | 17 | 6  | --     | MYB          |
|            | Ca(ICC2/PI489777)SNP_32531 | 1574 | C | T | 23 | 7  | --     | MYB          |
| CakTC39329 | Ca(ICC2/PI489777)SNP_32532 | 1023 | G | T | 15 | 8  | --     | --           |
| CakTC39315 | Ca(ICC2/PI489777)SNP_32533 | 607  | C | T | 9  | 6  | --     | --           |
|            | Ca(ICC2/PI489777)SNP_32534 | 629  | G | A | 8  | 5  | --     | --           |
|            | Ca(ICC2/PI489777)SNP_32535 | 893  | C | G | 12 | 3  | --     | --           |
| CakTC30186 | Ca(ICC2/PI489777)SNP_32536 | 741  | A | G | 5  | 9  | --     | --           |
| CakTC40047 | Ca(ICC2/PI489777)SNP_32537 | 398  | G | A | 3  | 6  | Flower | bud          |
|            | Ca(ICC2/PI489777)SNP_32538 | 1323 | G | T | 3  | 7  | Flower | bud          |
| CakTC28255 | Ca(ICC2/PI489777)SNP_32539 | 745  | C | T | 19 | 11 | Flower | bud          |
|            | Ca(ICC2/PI489777)SNP_32540 | 1216 | C | T | 7  | 14 | Flower | bud          |
|            | Ca(ICC2/PI489777)SNP_32541 | 1660 | A | G | 21 | 19 | Flower | bud          |
|            | Ca(ICC2/PI489777)SNP_32542 | 2800 | G | C | 18 | 15 | Flower | bud          |
| CakTC27155 | Ca(ICC2/PI489777)SNP_32543 | 123  | T | G | 14 | 6  | --     | --           |
|            | Ca(ICC2/PI489777)SNP_32544 | 207  | A | G | 19 | 12 | --     | --           |
|            | Ca(ICC2/PI489777)SNP_32545 | 449  | C | A | 21 | 17 | --     | --           |
|            | Ca(ICC2/PI489777)SNP_32546 | 723  | G | A | 4  | 14 | --     | --           |
|            | Ca(ICC2/PI489777)SNP_32547 | 1639 | G | C | 14 | 6  | --     | --           |
| CakTC20018 | Ca(ICC2/PI489777)SNP_32548 | 104  | G | T | 4  | 3  | --     | --           |
|            | Ca(ICC2/PI489777)SNP_32549 | 257  | C | A | 3  | 3  | --     | --           |
|            | Ca(ICC2/PI489777)SNP_32550 | 280  | C | T | 3  | 3  | --     | --           |
|            | Ca(ICC2/PI489777)SNP_32551 | 285  | T | G | 3  | 3  | --     | --           |
|            | Ca(ICC2/PI489777)SNP_32552 | 291  | A | T | 3  | 3  | --     | --           |
| CakTC37675 | Ca(ICC2/PI489777)SNP_32553 | 469  | T | C | 15 | 6  | --     | --           |
|            | Ca(ICC2/PI489777)SNP_32554 | 1108 | A | G | 19 | 9  | --     | --           |
| CakTC41538 | Ca(ICC2/PI489777)SNP_32555 | 171  | T | C | 9  | 3  | --     | ARR-B        |



|            |                            |      |   |   |     |    |        |       |
|------------|----------------------------|------|---|---|-----|----|--------|-------|
|            | Ca(ICC2/PI489777)SNP_32556 | 766  | T | C | 15  | 4  | --     | ARR-B |
|            | Ca(ICC2/PI489777)SNP_32557 | 811  | A | G | 14  | 3  | --     | ARR-B |
|            | Ca(ICC2/PI489777)SNP_32558 | 859  | G | T | 20  | 6  | --     | ARR-B |
|            | Ca(ICC2/PI489777)SNP_32559 | 1005 | G | A | 28  | 6  | --     | ARR-B |
|            | Ca(ICC2/PI489777)SNP_32560 | 1060 | C | T | 33  | 5  | --     | ARR-B |
|            | Ca(ICC2/PI489777)SNP_32561 | 1101 | G | C | 33  | 5  | --     | ARR-B |
|            | Ca(ICC2/PI489777)SNP_32562 | 1234 | T | C | 30  | 13 | --     | ARR-B |
|            | Ca(ICC2/PI489777)SNP_32563 | 1653 | C | T | 12  | 6  | --     | ARR-B |
|            | Ca(ICC2/PI489777)SNP_32564 | 1789 | C | T | 18  | 5  | --     | ARR-B |
|            | Ca(ICC2/PI489777)SNP_32565 | 2025 | T | C | 15  | 9  | --     | ARR-B |
|            | Ca(ICC2/PI489777)SNP_32566 | 2085 | T | C | 14  | 8  | --     | ARR-B |
|            | Ca(ICC2/PI489777)SNP_32567 | 2093 | C | T | 14  | 8  | --     | ARR-B |
| CakTC29671 | Ca(ICC2/PI489777)SNP_32568 | 91   | G | A | 3   | 3  | --     | --    |
|            | Ca(ICC2/PI489777)SNP_32569 | 150  | T | C | 3   | 5  | --     | --    |
|            | Ca(ICC2/PI489777)SNP_32570 | 193  | T | C | 3   | 3  | --     | --    |
|            | Ca(ICC2/PI489777)SNP_32571 | 368  | C | T | 3   | 3  | --     | --    |
|            | Ca(ICC2/PI489777)SNP_32572 | 561  | C | T | 3   | 4  | --     | --    |
| CakTC41712 | Ca(ICC2/PI489777)SNP_32573 | 288  | T | C | 8   | 5  | --     | --    |
|            | Ca(ICC2/PI489777)SNP_32574 | 399  | C | G | 7   | 5  | --     | --    |
|            | Ca(ICC2/PI489777)SNP_32575 | 527  | A | G | 6   | 3  | --     | --    |
| CakTC42682 | Ca(ICC2/PI489777)SNP_32576 | 471  | G | A | 78  | 36 | --     | --    |
|            | Ca(ICC2/PI489777)SNP_32577 | 670  | G | C | 32  | 14 | --     | --    |
|            | Ca(ICC2/PI489777)SNP_32578 | 757  | T | C | 26  | 7  | --     | --    |
| CakTC29161 | Ca(ICC2/PI489777)SNP_32579 | 414  | A | G | 9   | 3  | --     | --    |
|            | Ca(ICC2/PI489777)SNP_32580 | 687  | C | T | 6   | 4  | --     | --    |
|            | Ca(ICC2/PI489777)SNP_32581 | 696  | A | G | 6   | 4  | --     | --    |
|            | Ca(ICC2/PI489777)SNP_32582 | 900  | G | A | 3   | 7  | --     | --    |
|            | Ca(ICC2/PI489777)SNP_32583 | 947  | G | T | 3   | 9  | --     | --    |
|            | Ca(ICC2/PI489777)SNP_32584 | 966  | T | A | 4   | 8  | --     | --    |
|            | Ca(ICC2/PI489777)SNP_32585 | 999  | G | A | 3   | 9  | --     | --    |
| CakTC05237 | Ca(ICC2/PI489777)SNP_32586 | 1701 | A | G | 5   | 5  | --     | --    |
| CakTC31756 | Ca(ICC2/PI489777)SNP_32587 | 376  | G | A | 5   | 7  | Flower | bud   |
| CakTC22740 | Ca(ICC2/PI489777)SNP_32588 | 1763 | C | T | 5   | 5  | Shoot  | --    |
|            | Ca(ICC2/PI489777)SNP_32589 | 1796 | G | A | 6   | 6  | Shoot  | --    |
|            | Ca(ICC2/PI489777)SNP_32590 | 1807 | G | A | 20  | 6  | Shoot  | --    |
|            | Ca(ICC2/PI489777)SNP_32591 | 1819 | A | T | 22  | 7  | Shoot  | --    |
|            | Ca(ICC2/PI489777)SNP_32592 | 2027 | A | T | 141 | 43 | Shoot  | --    |
|            | Ca(ICC2/PI489777)SNP_32593 | 2852 | C | G | 7   | 12 | Shoot  | --    |
| CakTC28190 | Ca(ICC2/PI489777)SNP_32594 | 825  | C | T | 36  | 13 | --     | --    |
|            | Ca(ICC2/PI489777)SNP_32595 | 861  | G | A | 32  | 13 | --     | --    |
|            | Ca(ICC2/PI489777)SNP_32596 | 925  | G | A | 29  | 14 | --     | --    |
| CakTC33912 | Ca(ICC2/PI489777)SNP_32597 | 7    | A | C | 5   | 8  | --     | --    |
|            | Ca(ICC2/PI489777)SNP_32598 | 40   | T | C | 15  | 26 | --     | --    |
| CakTC37181 | Ca(ICC2/PI489777)SNP_32599 | 1057 | C | T | 7   | 6  | --     | --    |
|            | Ca(ICC2/PI489777)SNP_32600 | 1086 | T | C | 6   | 5  | --     | --    |
| CakTC09834 | Ca(ICC2/PI489777)SNP_32601 | 207  | G | T | 6   | 4  | --     | --    |
| CakTC41045 | Ca(ICC2/PI489777)SNP_32602 | 91   | A | C | 6   | 4  | --     | --    |
|            | Ca(ICC2/PI489777)SNP_32603 | 155  | T | C | 6   | 5  | --     | --    |
|            | Ca(ICC2/PI489777)SNP_32604 | 156  | G | T | 6   | 5  | --     | --    |
|            | Ca(ICC2/PI489777)SNP_32605 | 293  | C | A | 7   | 6  | --     | --    |
| CakTC35979 | Ca(ICC2/PI489777)SNP_32606 | 2372 | G | T | 29  | 10 | --     | --    |
| CakTC26745 | Ca(ICC2/PI489777)SNP_32607 | 389  | C | A | 18  | 6  | --     | --    |
|            | Ca(ICC2/PI489777)SNP_32608 | 435  | T | G | 17  | 5  | --     | --    |
|            | Ca(ICC2/PI489777)SNP_32609 | 1907 | G | C | 19  | 3  | --     | --    |
| CakTC37560 | Ca(ICC2/PI489777)SNP_32610 | 233  | A | C | 23  | 17 | --     | --    |
|            | Ca(ICC2/PI489777)SNP_32611 | 278  | A | G | 36  | 19 | --     | --    |
|            | Ca(ICC2/PI489777)SNP_32612 | 285  | A | G | 36  | 20 | --     | --    |
|            | Ca(ICC2/PI489777)SNP_32613 | 577  | C | T | 40  | 29 | --     | --    |
|            | Ca(ICC2/PI489777)SNP_32614 | 643  | C | T | 41  | 20 | --     | --    |
|            | Ca(ICC2/PI489777)SNP_32615 | 769  | T | C | 33  | 18 | --     | --    |
|            | Ca(ICC2/PI489777)SNP_32616 | 1195 | G | A | 31  | 22 | --     | --    |
| CakTC24308 | Ca(ICC2/PI489777)SNP_32617 | 652  | G | T | 5   | 6  | --     | --    |
|            | Ca(ICC2/PI489777)SNP_32618 | 1036 | C | T | 7   | 4  | --     | --    |
| CakTC33491 | Ca(ICC2/PI489777)SNP_32619 | 1135 | T | C | 20  | 9  | --     | --    |
|            | Ca(ICC2/PI489777)SNP_32620 | 1234 | T | C | 16  | 6  | --     | --    |
|            | Ca(ICC2/PI489777)SNP_32621 | 1369 | G | A | 16  | 6  | --     | --    |
| CakTC10813 | Ca(ICC2/PI489777)SNP_32622 | 125  | A | C | 5   | 3  | --     | --    |
|            | Ca(ICC2/PI489777)SNP_32623 | 803  | T | C | 7   | 4  | --     | --    |
|            | Ca(ICC2/PI489777)SNP_32624 | 852  | G | C | 7   | 4  | --     | --    |
| CakTC34805 | Ca(ICC2/PI489777)SNP_32625 | 234  | T | A | 5   | 4  | --     | --    |
|            | Ca(ICC2/PI489777)SNP_32626 | 502  | G | A | 6   | 6  | --     | --    |
|            | Ca(ICC2/PI489777)SNP_32627 | 2638 | C | G | 7   | 3  | --     | --    |
|            | Ca(ICC2/PI489777)SNP_32628 | 3016 | C | T | 26  | 8  | --     | --    |
|            | Ca(ICC2/PI489777)SNP_32629 | 3040 | A | C | 25  | 7  | --     | --    |

|            |                             |      |   |   |    |    |    |      |
|------------|-----------------------------|------|---|---|----|----|----|------|
| CakTC09314 | Ca(ICCV2/PI489777)SNP_32630 | 465  | T | C | 3  | 3  | -- | --   |
| CakTC11532 | Ca(ICCV2/PI489777)SNP_32631 | 731  | C | T | 13 | 7  | -- | --   |
| CakTC24601 | Ca(ICCV2/PI489777)SNP_32632 | 715  | G | T | 39 | 9  | -- | --   |
| CakTC40353 | Ca(ICCV2/PI489777)SNP_32633 | 1596 | C | T | 4  | 4  | -- | --   |
|            | Ca(ICCV2/PI489777)SNP_32634 | 3405 | A | G | 6  | 6  | -- | --   |
|            | Ca(ICCV2/PI489777)SNP_32635 | 4324 | G | A | 8  | 3  | -- | --   |
|            | Ca(ICCV2/PI489777)SNP_32636 | 4467 | C | T | 4  | 3  | -- | --   |
| CakTC40641 | Ca(ICCV2/PI489777)SNP_32637 | 580  | A | G | 7  | 9  | -- | --   |
|            | Ca(ICCV2/PI489777)SNP_32638 | 668  | C | G | 8  | 8  | -- | --   |
|            | Ca(ICCV2/PI489777)SNP_32639 | 680  | A | G | 7  | 8  | -- | --   |
| CakTC37253 | Ca(ICCV2/PI489777)SNP_32640 | 364  | G | A | 11 | 14 | -- | --   |
|            | Ca(ICCV2/PI489777)SNP_32641 | 384  | A | T | 12 | 13 | -- | --   |
|            | Ca(ICCV2/PI489777)SNP_32642 | 531  | A | G | 6  | 19 | -- | --   |
|            | Ca(ICCV2/PI489777)SNP_32643 | 660  | A | G | 8  | 28 | -- | --   |
|            | Ca(ICCV2/PI489777)SNP_32644 | 759  | G | A | 7  | 18 | -- | --   |
|            | Ca(ICCV2/PI489777)SNP_32645 | 906  | C | T | 4  | 16 | -- | --   |
|            | Ca(ICCV2/PI489777)SNP_32646 | 907  | G | A | 4  | 16 | -- | --   |
|            | Ca(ICCV2/PI489777)SNP_32647 | 940  | T | A | 4  | 16 | -- | --   |
|            | Ca(ICCV2/PI489777)SNP_32648 | 982  | C | G | 4  | 16 | -- | --   |
| CakTC28412 | Ca(ICCV2/PI489777)SNP_32649 | 85   | C | G | 18 | 27 | -- | --   |
|            | Ca(ICCV2/PI489777)SNP_32650 | 109  | G | T | 22 | 27 | -- | --   |
|            | Ca(ICCV2/PI489777)SNP_32651 | 607  | G | T | 28 | 30 | -- | --   |
|            | Ca(ICCV2/PI489777)SNP_32652 | 1106 | T | G | 29 | 22 | -- | --   |
| CakTC37387 | Ca(ICCV2/PI489777)SNP_32653 | 410  | C | T | 16 | 8  | -- | --   |
|            | Ca(ICCV2/PI489777)SNP_32654 | 569  | C | T | 17 | 7  | -- | --   |
|            | Ca(ICCV2/PI489777)SNP_32655 | 601  | T | G | 15 | 7  | -- | --   |
| CakTC38303 | Ca(ICCV2/PI489777)SNP_32656 | 280  | C | T | 5  | 3  | -- | --   |
| CakTC32648 | Ca(ICCV2/PI489777)SNP_32657 | 1486 | C | T | 19 | 15 | -- | --   |
|            | Ca(ICCV2/PI489777)SNP_32658 | 1945 | A | G | 16 | 12 | -- | --   |
| CakTC31129 | Ca(ICCV2/PI489777)SNP_32659 | 763  | A | G | 4  | 4  | -- | --   |
| CakTC22276 | Ca(ICCV2/PI489777)SNP_32660 | 1088 | T | C | 4  | 13 | -- | --   |
|            | Ca(ICCV2/PI489777)SNP_32661 | 1321 | A | G | 3  | 3  | -- | --   |
|            | Ca(ICCV2/PI489777)SNP_32662 | 1391 | A | G | 4  | 3  | -- | --   |
| CakTC41312 | Ca(ICCV2/PI489777)SNP_32663 | 581  | A | G | 12 | 11 | -- | --   |
| CakTC28553 | Ca(ICCV2/PI489777)SNP_32664 | 85   | G | A | 11 | 6  | -- | --   |
|            | Ca(ICCV2/PI489777)SNP_32665 | 2280 | A | C | 14 | 4  | -- | --   |
|            | Ca(ICCV2/PI489777)SNP_32666 | 3014 | G | A | 14 | 10 | -- | --   |
|            | Ca(ICCV2/PI489777)SNP_32667 | 3467 | C | T | 17 | 5  | -- | --   |
| CakTC37576 | Ca(ICCV2/PI489777)SNP_32668 | 112  | G | T | 16 | 9  | -- | --   |
|            | Ca(ICCV2/PI489777)SNP_32669 | 212  | C | T | 17 | 10 | -- | --   |
|            | Ca(ICCV2/PI489777)SNP_32670 | 670  | T | C | 6  | 4  | -- | --   |
|            | Ca(ICCV2/PI489777)SNP_32671 | 723  | T | G | 5  | 7  | -- | --   |
|            | Ca(ICCV2/PI489777)SNP_32672 | 951  | G | A | 4  | 11 | -- | --   |
|            | Ca(ICCV2/PI489777)SNP_32673 | 976  | G | T | 4  | 11 | -- | --   |
| CakTC40098 | Ca(ICCV2/PI489777)SNP_32674 | 1210 | A | G | 9  | 5  | -- | --   |
|            | Ca(ICCV2/PI489777)SNP_32675 | 1228 | C | G | 9  | 4  | -- | --   |
| CakTC33002 | Ca(ICCV2/PI489777)SNP_32676 | 194  | C | A | 5  | 6  | -- | HB   |
|            | Ca(ICCV2/PI489777)SNP_32677 | 223  | A | T | 4  | 7  | -- | HB   |
|            | Ca(ICCV2/PI489777)SNP_32678 | 293  | T | G | 6  | 11 | -- | HB   |
|            | Ca(ICCV2/PI489777)SNP_32679 | 376  | A | C | 6  | 8  | -- | HB   |
|            | Ca(ICCV2/PI489777)SNP_32680 | 382  | C | T | 6  | 7  | -- | HB   |
|            | Ca(ICCV2/PI489777)SNP_32681 | 484  | C | G | 6  | 6  | -- | HB   |
|            | Ca(ICCV2/PI489777)SNP_32682 | 580  | A | C | 8  | 7  | -- | HB   |
|            | Ca(ICCV2/PI489777)SNP_32683 | 1595 | G | A | 6  | 8  | -- | HB   |
|            | Ca(ICCV2/PI489777)SNP_32684 | 1942 | A | G | 12 | 6  | -- | HB   |
|            | Ca(ICCV2/PI489777)SNP_32685 | 1960 | T | C | 14 | 5  | -- | HB   |
|            | Ca(ICCV2/PI489777)SNP_32686 | 2129 | A | G | 7  | 5  | -- | HB   |
|            | Ca(ICCV2/PI489777)SNP_32687 | 2158 | C | T | 7  | 4  | -- | HB   |
| CakTC42693 | Ca(ICCV2/PI489777)SNP_32688 | 581  | A | G | 12 | 6  | -- | --   |
|            | Ca(ICCV2/PI489777)SNP_32689 | 1890 | C | G | 8  | 3  | -- | --   |
| CakTC41171 | Ca(ICCV2/PI489777)SNP_32690 | 664  | T | C | 6  | 6  | -- | --   |
|            | Ca(ICCV2/PI489777)SNP_32691 | 1563 | T | C | 16 | 7  | -- | --   |
|            | Ca(ICCV2/PI489777)SNP_32692 | 2007 | A | G | 9  | 5  | -- | --   |
| CakTC01160 | Ca(ICCV2/PI489777)SNP_32693 | 763  | A | G | 5  | 4  | -- | GRAS |
|            | Ca(ICCV2/PI489777)SNP_32694 | 816  | G | A | 5  | 4  | -- | GRAS |
|            | Ca(ICCV2/PI489777)SNP_32695 | 1465 | A | G | 3  | 3  | -- | GRAS |
|            | Ca(ICCV2/PI489777)SNP_32696 | 1636 | T | C | 6  | 5  | -- | GRAS |
| CakTC34682 | Ca(ICCV2/PI489777)SNP_32697 | 418  | T | C | 11 | 8  | -- | --   |
|            | Ca(ICCV2/PI489777)SNP_32698 | 574  | C | T | 9  | 6  | -- | --   |
|            | Ca(ICCV2/PI489777)SNP_32699 | 973  | G | A | 17 | 10 | -- | --   |
|            | Ca(ICCV2/PI489777)SNP_32700 | 2074 | A | T | 25 | 6  | -- | --   |
|            | Ca(ICCV2/PI489777)SNP_32701 | 3046 | A | G | 12 | 7  | -- | --   |
|            | Ca(ICCV2/PI489777)SNP_32702 | 3474 | T | C | 6  | 7  | -- | --   |
| CakTC23514 | Ca(ICCV2/PI489777)SNP_32703 | 2410 | T | C | 51 | 33 | -- | --   |

|            |                            |      |   |   |    |    |    |          |
|------------|----------------------------|------|---|---|----|----|----|----------|
|            | Ca(ICC2/PI489777)SNP_32704 | 2422 | T | C | 52 | 32 | -- | --       |
|            | Ca(ICC2/PI489777)SNP_32705 | 3560 | G | A | 3  | 4  | -- | --       |
|            | Ca(ICC2/PI489777)SNP_32706 | 3573 | A | G | 3  | 3  | -- | --       |
| CakTC32618 | Ca(ICC2/PI489777)SNP_32707 | 179  | G | C | 10 | 35 | -- | --       |
|            | Ca(ICC2/PI489777)SNP_32708 | 181  | G | C | 15 | 36 | -- | --       |
| CakTC32921 | Ca(ICC2/PI489777)SNP_32709 | 162  | G | A | 23 | 15 | -- | --       |
|            | Ca(ICC2/PI489777)SNP_32710 | 329  | G | T | 24 | 15 | -- | --       |
| CakTC24161 | Ca(ICC2/PI489777)SNP_32711 | 1597 | G | T | 6  | 3  | -- | --       |
|            | Ca(ICC2/PI489777)SNP_32712 | 2527 | T | C | 3  | 7  | -- | --       |
|            | Ca(ICC2/PI489777)SNP_32713 | 2611 | A | T | 5  | 7  | -- | --       |
|            | Ca(ICC2/PI489777)SNP_32714 | 2921 | T | G | 5  | 3  | -- | --       |
| CakTC29002 | Ca(ICC2/PI489777)SNP_32715 | 249  | T | C | 6  | 12 | -- | --       |
|            | Ca(ICC2/PI489777)SNP_32716 | 433  | C | A | 9  | 6  | -- | --       |
|            | Ca(ICC2/PI489777)SNP_32717 | 797  | A | G | 14 | 6  | -- | --       |
|            | Ca(ICC2/PI489777)SNP_32718 | 930  | A | G | 5  | 6  | -- | --       |
| CakTC23970 | Ca(ICC2/PI489777)SNP_32719 | 223  | C | T | 8  | 7  | -- | --       |
|            | Ca(ICC2/PI489777)SNP_32720 | 263  | C | T | 8  | 4  | -- | --       |
|            | Ca(ICC2/PI489777)SNP_32721 | 334  | G | A | 9  | 4  | -- | --       |
|            | Ca(ICC2/PI489777)SNP_32722 | 493  | T | C | 8  | 4  | -- | --       |
|            | Ca(ICC2/PI489777)SNP_32723 | 521  | T | C | 6  | 3  | -- | --       |
|            | Ca(ICC2/PI489777)SNP_32724 | 1955 | G | A | 13 | 4  | -- | --       |
|            | Ca(ICC2/PI489777)SNP_32725 | 3931 | C | T | 14 | 12 | -- | --       |
| CakTC15732 | Ca(ICC2/PI489777)SNP_32726 | 178  | C | A | 4  | 3  | -- | --       |
| CakTC41995 | Ca(ICC2/PI489777)SNP_32727 | 414  | G | A | 7  | 10 | -- | --       |
|            | Ca(ICC2/PI489777)SNP_32728 | 417  | C | T | 7  | 9  | -- | --       |
| CakTC42216 | Ca(ICC2/PI489777)SNP_32729 | 454  | G | A | 3  | 6  | -- | --       |
| CakTC42941 | Ca(ICC2/PI489777)SNP_32730 | 510  | G | A | 44 | 8  | -- | --       |
|            | Ca(ICC2/PI489777)SNP_32731 | 591  | G | A | 45 | 9  | -- | --       |
|            | Ca(ICC2/PI489777)SNP_32732 | 648  | G | A | 27 | 8  | -- | --       |
| CakTC39420 | Ca(ICC2/PI489777)SNP_32733 | 197  | T | C | 8  | 4  | -- | --       |
| CakTC25972 | Ca(ICC2/PI489777)SNP_32734 | 273  | G | A | 20 | 9  | -- | --       |
|            | Ca(ICC2/PI489777)SNP_32735 | 282  | T | G | 19 | 9  | -- | --       |
| CakTC43306 | Ca(ICC2/PI489777)SNP_32736 | 678  | G | A | 6  | 5  | -- | --       |
| CakTC26070 | Ca(ICC2/PI489777)SNP_32737 | 421  | C | T | 59 | 46 | -- | --       |
|            | Ca(ICC2/PI489777)SNP_32738 | 502  | T | C | 59 | 54 | -- | --       |
|            | Ca(ICC2/PI489777)SNP_32739 | 793  | C | G | 56 | 36 | -- | --       |
| CakTC39546 | Ca(ICC2/PI489777)SNP_32740 | 346  | A | G | 28 | 19 | -- | --       |
|            | Ca(ICC2/PI489777)SNP_32741 | 382  | G | A | 24 | 18 | -- | --       |
|            | Ca(ICC2/PI489777)SNP_32742 | 790  | T | C | 14 | 13 | -- | --       |
|            | Ca(ICC2/PI489777)SNP_32743 | 895  | G | A | 11 | 15 | -- | --       |
| CakTC12193 | Ca(ICC2/PI489777)SNP_32744 | 347  | C | T | 12 | 4  | -- | --       |
| CakTC26348 | Ca(ICC2/PI489777)SNP_32745 | 137  | A | C | 5  | 3  | -- | --       |
|            | Ca(ICC2/PI489777)SNP_32746 | 2864 | A | G | 9  | 4  | -- | --       |
| CakTC37778 | Ca(ICC2/PI489777)SNP_32747 | 362  | C | G | 3  | 5  | -- | --       |
| CakTC09421 | Ca(ICC2/PI489777)SNP_32748 | 343  | G | A | 3  | 10 | -- | --       |
| CakTC40032 | Ca(ICC2/PI489777)SNP_32749 | 224  | C | G | 3  | 4  | -- | --       |
|            | Ca(ICC2/PI489777)SNP_32750 | 281  | C | G | 4  | 4  | -- | --       |
|            | Ca(ICC2/PI489777)SNP_32751 | 285  | A | G | 4  | 5  | -- | --       |
|            | Ca(ICC2/PI489777)SNP_32752 | 505  | A | T | 6  | 4  | -- | --       |
|            | Ca(ICC2/PI489777)SNP_32753 | 545  | G | A | 6  | 4  | -- | --       |
| CakTC36260 | Ca(ICC2/PI489777)SNP_32754 | 388  | G | T | 6  | 3  | -- | --       |
|            | Ca(ICC2/PI489777)SNP_32755 | 392  | C | T | 4  | 3  | -- | --       |
|            | Ca(ICC2/PI489777)SNP_32756 | 1567 | A | G | 25 | 14 | -- | --       |
|            | Ca(ICC2/PI489777)SNP_32757 | 1843 | T | A | 12 | 18 | -- | --       |
|            | Ca(ICC2/PI489777)SNP_32758 | 2689 | A | G | 31 | 17 | -- | --       |
|            | Ca(ICC2/PI489777)SNP_32759 | 2998 | G | A | 11 | 12 | -- | --       |
| CakTC23351 | Ca(ICC2/PI489777)SNP_32760 | 1672 | T | C | 18 | 4  | -- | --       |
|            | Ca(ICC2/PI489777)SNP_32761 | 1686 | G | C | 22 | 4  | -- | --       |
|            | Ca(ICC2/PI489777)SNP_32762 | 2061 | T | G | 18 | 5  | -- | --       |
|            | Ca(ICC2/PI489777)SNP_32763 | 2101 | C | T | 24 | 6  | -- | --       |
|            | Ca(ICC2/PI489777)SNP_32764 | 3964 | A | G | 24 | 3  | -- | --       |
|            | Ca(ICC2/PI489777)SNP_32765 | 4149 | A | T | 25 | 6  | -- | --       |
| CakTC28247 | Ca(ICC2/PI489777)SNP_32766 | 1830 | G | A | 15 | 7  | -- | --       |
|            | Ca(ICC2/PI489777)SNP_32767 | 2059 | T | G | 8  | 3  | -- | --       |
| CakTC38697 | Ca(ICC2/PI489777)SNP_32768 | 200  | A | T | 6  | 4  | -- | C2C2-Dof |
|            | Ca(ICC2/PI489777)SNP_32769 | 257  | C | T | 9  | 6  | -- | C2C2-Dof |
|            | Ca(ICC2/PI489777)SNP_32770 | 368  | G | A | 10 | 7  | -- | C2C2-Dof |
|            | Ca(ICC2/PI489777)SNP_32771 | 391  | T | G | 11 | 6  | -- | C2C2-Dof |
|            | Ca(ICC2/PI489777)SNP_32772 | 544  | C | G | 8  | 5  | -- | C2C2-Dof |
|            | Ca(ICC2/PI489777)SNP_32773 | 595  | C | A | 9  | 4  | -- | C2C2-Dof |
| CakTC25953 | Ca(ICC2/PI489777)SNP_32774 | 169  | C | T | 18 | 19 | -- | --       |
|            | Ca(ICC2/PI489777)SNP_32775 | 249  | T | C | 31 | 24 | -- | --       |
|            | Ca(ICC2/PI489777)SNP_32776 | 766  | C | T | 35 | 32 | -- | --       |
|            | Ca(ICC2/PI489777)SNP_32777 | 772  | A | C | 35 | 29 | -- | --       |

|            |                             |      |   |   |    |    |    |      |
|------------|-----------------------------|------|---|---|----|----|----|------|
|            | Ca(ICCV2/PI489777)SNP_32778 | 1541 | A | G | 14 | 4  | -- | --   |
| CakTC39199 | Ca(ICCV2/PI489777)SNP_32779 | 1182 | A | G | 11 | 8  | -- | --   |
|            | Ca(ICCV2/PI489777)SNP_32780 | 1484 | C | G | 4  | 4  | -- | --   |
| CakTC31636 | Ca(ICCV2/PI489777)SNP_32781 | 554  | T | A | 6  | 10 | -- | --   |
| CakTC12529 | Ca(ICCV2/PI489777)SNP_32782 | 393  | T | C | 5  | 3  | -- | --   |
|            | Ca(ICCV2/PI489777)SNP_32783 | 402  | A | T | 5  | 3  | -- | --   |
|            | Ca(ICCV2/PI489777)SNP_32784 | 435  | A | T | 5  | 3  | -- | --   |
| CakTC38226 | Ca(ICCV2/PI489777)SNP_32785 | 784  | G | C | 8  | 9  | -- | --   |
|            | Ca(ICCV2/PI489777)SNP_32786 | 820  | G | A | 8  | 8  | -- | --   |
| CakTC39717 | Ca(ICCV2/PI489777)SNP_32787 | 698  | G | A | 4  | 6  | -- | TPR  |
|            | Ca(ICCV2/PI489777)SNP_32788 | 734  | C | T | 3  | 6  | -- | TPR  |
| CakTC35527 | Ca(ICCV2/PI489777)SNP_32789 | 2416 | T | A | 18 | 7  | -- | TPR  |
|            | Ca(ICCV2/PI489777)SNP_32790 | 2427 | C | T | 20 | 8  | -- | TPR  |
|            | Ca(ICCV2/PI489777)SNP_32791 | 2596 | C | T | 23 | 12 | -- | TPR  |
|            | Ca(ICCV2/PI489777)SNP_32792 | 2659 | T | A | 14 | 14 | -- | TPR  |
|            | Ca(ICCV2/PI489777)SNP_32793 | 2962 | C | T | 11 | 15 | -- | TPR  |
|            | Ca(ICCV2/PI489777)SNP_32794 | 3001 | A | G | 15 | 15 | -- | TPR  |
|            | Ca(ICCV2/PI489777)SNP_32795 | 3373 | T | A | 15 | 11 | -- | TPR  |
|            | Ca(ICCV2/PI489777)SNP_32796 | 3422 | A | T | 5  | 4  | -- | TPR  |
| CakTC34060 | Ca(ICCV2/PI489777)SNP_32797 | 1360 | G | C | 11 | 5  | -- | --   |
|            | Ca(ICCV2/PI489777)SNP_32798 | 1883 | G | A | 7  | 3  | -- | --   |
| CakTC32400 | Ca(ICCV2/PI489777)SNP_32799 | 382  | C | T | 5  | 8  | -- | --   |
|            | Ca(ICCV2/PI489777)SNP_32800 | 575  | T | G | 8  | 11 | -- | --   |
|            | Ca(ICCV2/PI489777)SNP_32801 | 1062 | T | C | 14 | 3  | -- | --   |
|            | Ca(ICCV2/PI489777)SNP_32802 | 1420 | A | G | 4  | 8  | -- | --   |
|            | Ca(ICCV2/PI489777)SNP_32803 | 1858 | T | C | 4  | 5  | -- | --   |
| CakTC28011 | Ca(ICCV2/PI489777)SNP_32804 | 1616 | G | A | 4  | 4  | -- | ARID |
| CakTC27292 | Ca(ICCV2/PI489777)SNP_32805 | 517  | C | G | 3  | 4  | -- | --   |
| CakTC22536 | Ca(ICCV2/PI489777)SNP_32806 | 578  | T | G | 12 | 5  | -- | --   |
|            | Ca(ICCV2/PI489777)SNP_32807 | 1389 | C | G | 32 | 13 | -- | --   |
|            | Ca(ICCV2/PI489777)SNP_32808 | 1444 | C | A | 33 | 13 | -- | --   |
|            | Ca(ICCV2/PI489777)SNP_32809 | 2058 | C | G | 13 | 3  | -- | --   |
|            | Ca(ICCV2/PI489777)SNP_32810 | 2088 | C | A | 10 | 3  | -- | --   |
|            | Ca(ICCV2/PI489777)SNP_32811 | 2092 | G | A | 10 | 3  | -- | --   |
|            | Ca(ICCV2/PI489777)SNP_32812 | 2099 | A | G | 8  | 3  | -- | --   |
|            | Ca(ICCV2/PI489777)SNP_32813 | 2238 | G | T | 11 | 4  | -- | --   |
|            | Ca(ICCV2/PI489777)SNP_32814 | 2262 | G | A | 8  | 4  | -- | --   |
|            | Ca(ICCV2/PI489777)SNP_32815 | 2268 | C | T | 10 | 4  | -- | --   |
|            | Ca(ICCV2/PI489777)SNP_32816 | 2363 | C | G | 5  | 4  | -- | --   |
|            | Ca(ICCV2/PI489777)SNP_32817 | 2537 | T | C | 7  | 3  | -- | --   |
|            | Ca(ICCV2/PI489777)SNP_32818 | 2637 | T | C | 6  | 3  | -- | --   |
| CakTC34251 | Ca(ICCV2/PI489777)SNP_32819 | 303  | G | C | 3  | 3  | -- | --   |
|            | Ca(ICCV2/PI489777)SNP_32820 | 335  | T | G | 3  | 3  | -- | --   |
| CakTC26720 | Ca(ICCV2/PI489777)SNP_32821 | 2050 | C | G | 5  | 5  | -- | --   |
|            | Ca(ICCV2/PI489777)SNP_32822 | 2145 | C | G | 3  | 3  | -- | --   |
|            | Ca(ICCV2/PI489777)SNP_32823 | 2162 | A | G | 4  | 3  | -- | --   |
| CakTC36716 | Ca(ICCV2/PI489777)SNP_32824 | 106  | G | A | 4  | 3  | -- | --   |
|            | Ca(ICCV2/PI489777)SNP_32825 | 232  | A | C | 14 | 3  | -- | --   |
|            | Ca(ICCV2/PI489777)SNP_32826 | 233  | G | A | 14 | 3  | -- | --   |
|            | Ca(ICCV2/PI489777)SNP_32827 | 250  | T | G | 14 | 3  | -- | --   |
|            | Ca(ICCV2/PI489777)SNP_32828 | 1094 | T | G | 14 | 9  | -- | --   |
|            | Ca(ICCV2/PI489777)SNP_32829 | 1147 | C | G | 13 | 10 | -- | --   |
|            | Ca(ICCV2/PI489777)SNP_32830 | 1441 | A | T | 15 | 6  | -- | --   |
|            | Ca(ICCV2/PI489777)SNP_32831 | 1444 | A | G | 14 | 6  | -- | --   |
|            | Ca(ICCV2/PI489777)SNP_32832 | 1534 | A | G | 11 | 6  | -- | --   |
|            | Ca(ICCV2/PI489777)SNP_32833 | 1688 | T | C | 15 | 4  | -- | --   |
|            | Ca(ICCV2/PI489777)SNP_32834 | 2320 | A | G | 10 | 9  | -- | --   |
|            | Ca(ICCV2/PI489777)SNP_32835 | 2421 | T | A | 11 | 8  | -- | --   |
|            | Ca(ICCV2/PI489777)SNP_32836 | 2425 | C | T | 11 | 8  | -- | --   |
|            | Ca(ICCV2/PI489777)SNP_32837 | 2442 | T | C | 11 | 8  | -- | --   |
|            | Ca(ICCV2/PI489777)SNP_32838 | 2476 | C | T | 10 | 8  | -- | --   |
| CakTC34082 | Ca(ICCV2/PI489777)SNP_32839 | 435  | G | A | 13 | 11 | -- | --   |
|            | Ca(ICCV2/PI489777)SNP_32840 | 561  | C | T | 13 | 10 | -- | --   |
|            | Ca(ICCV2/PI489777)SNP_32841 | 570  | G | C | 15 | 9  | -- | --   |
|            | Ca(ICCV2/PI489777)SNP_32842 | 600  | T | C | 15 | 5  | -- | --   |
|            | Ca(ICCV2/PI489777)SNP_32843 | 636  | T | C | 16 | 5  | -- | --   |
|            | Ca(ICCV2/PI489777)SNP_32844 | 687  | G | A | 18 | 5  | -- | --   |
|            | Ca(ICCV2/PI489777)SNP_32845 | 879  | C | T | 25 | 9  | -- | --   |
|            | Ca(ICCV2/PI489777)SNP_32846 | 969  | G | A | 24 | 7  | -- | --   |
|            | Ca(ICCV2/PI489777)SNP_32847 | 2166 | G | A | 15 | 8  | -- | --   |
|            | Ca(ICCV2/PI489777)SNP_32848 | 2658 | T | C | 11 | 11 | -- | --   |
|            | Ca(ICCV2/PI489777)SNP_32849 | 2973 | T | C | 22 | 14 | -- | --   |
|            | Ca(ICCV2/PI489777)SNP_32850 | 4005 | T | C | 17 | 9  | -- | --   |
|            | Ca(ICCV2/PI489777)SNP_32851 | 4020 | T | A | 18 | 9  | -- | --   |

|            |                            |      |   |   |     |    |        |         |
|------------|----------------------------|------|---|---|-----|----|--------|---------|
|            | Ca(ICC2/PI489777)SNP_32852 | 4492 | G | A | 29  | 7  | --     | --      |
|            | Ca(ICC2/PI489777)SNP_32853 | 6210 | A | T | 27  | 19 | --     | --      |
|            | Ca(ICC2/PI489777)SNP_32854 | 6246 | G | A | 28  | 21 | --     | --      |
|            | Ca(ICC2/PI489777)SNP_32855 | 6525 | G | T | 15  | 11 | --     | --      |
|            | Ca(ICC2/PI489777)SNP_32856 | 6681 | C | T | 10  | 9  | --     | --      |
|            | Ca(ICC2/PI489777)SNP_32857 | 6690 | T | A | 9   | 9  | --     | --      |
|            | Ca(ICC2/PI489777)SNP_32858 | 6885 | C | T | 6   | 5  | --     | --      |
| CakTC26521 | Ca(ICC2/PI489777)SNP_32859 | 177  | C | T | 115 | 67 | --     | --      |
|            | Ca(ICC2/PI489777)SNP_32860 | 712  | G | A | 117 | 68 | --     | --      |
|            | Ca(ICC2/PI489777)SNP_32861 | 1074 | A | G | 46  | 36 | --     | --      |
|            | Ca(ICC2/PI489777)SNP_32862 | 1075 | A | T | 44  | 36 | --     | --      |
|            | Ca(ICC2/PI489777)SNP_32863 | 1201 | A | G | 19  | 11 | --     | --      |
| CakTC39687 | Ca(ICC2/PI489777)SNP_32864 | 767  | A | T | 25  | 22 | --     | --      |
| CakTC07747 | Ca(ICC2/PI489777)SNP_32865 | 3522 | A | G | 12  | 4  | --     | --      |
| CakTC24273 | Ca(ICC2/PI489777)SNP_32866 | 2043 | A | G | 4   | 5  | --     | --      |
|            | Ca(ICC2/PI489777)SNP_32867 | 2161 | T | C | 4   | 5  | --     | --      |
| CakTC24159 | Ca(ICC2/PI489777)SNP_32868 | 539  | A | G | 5   | 6  | Shoot  | --      |
|            | Ca(ICC2/PI489777)SNP_32869 | 625  | A | G | 10  | 5  | Shoot  | --      |
|            | Ca(ICC2/PI489777)SNP_32870 | 756  | C | A | 14  | 8  | Shoot  | --      |
|            | Ca(ICC2/PI489777)SNP_32871 | 793  | A | T | 16  | 8  | Shoot  | --      |
|            | Ca(ICC2/PI489777)SNP_32872 | 852  | T | A | 16  | 7  | Shoot  | --      |
|            | Ca(ICC2/PI489777)SNP_32873 | 1006 | T | G | 14  | 8  | Shoot  | --      |
|            | Ca(ICC2/PI489777)SNP_32874 | 1127 | G | C | 5   | 7  | Shoot  | --      |
|            | Ca(ICC2/PI489777)SNP_32875 | 1189 | C | T | 6   | 6  | Shoot  | --      |
|            | Ca(ICC2/PI489777)SNP_32876 | 1274 | C | T | 7   | 6  | Shoot  | --      |
|            | Ca(ICC2/PI489777)SNP_32877 | 1276 | T | C | 7   | 6  | Shoot  | --      |
|            | Ca(ICC2/PI489777)SNP_32878 | 1345 | C | T | 7   | 6  | Shoot  | --      |
|            | Ca(ICC2/PI489777)SNP_32879 | 2862 | C | T | 3   | 8  | Shoot  | --      |
|            | Ca(ICC2/PI489777)SNP_32880 | 2906 | C | G | 3   | 5  | Shoot  | --      |
|            | Ca(ICC2/PI489777)SNP_32881 | 3009 | G | A | 3   | 6  | Shoot  | --      |
|            | Ca(ICC2/PI489777)SNP_32882 | 4334 | C | T | 3   | 3  | Shoot  | --      |
| CakTC28482 | Ca(ICC2/PI489777)SNP_32883 | 329  | G | C | 7   | 6  | --     | --      |
| CakTC42959 | Ca(ICC2/PI489777)SNP_32884 | 248  | G | A | 5   | 4  | --     | --      |
|            | Ca(ICC2/PI489777)SNP_32885 | 311  | T | G | 4   | 4  | --     | --      |
|            | Ca(ICC2/PI489777)SNP_32886 | 901  | G | A | 3   | 3  | --     | --      |
|            | Ca(ICC2/PI489777)SNP_32887 | 1306 | A | T | 14  | 5  | --     | --      |
|            | Ca(ICC2/PI489777)SNP_32888 | 1313 | G | T | 13  | 3  | --     | --      |
|            | Ca(ICC2/PI489777)SNP_32889 | 1369 | A | G | 7   | 7  | --     | --      |
|            | Ca(ICC2/PI489777)SNP_32890 | 1756 | C | T | 8   | 5  | --     | --      |
| CakTC31550 | Ca(ICC2/PI489777)SNP_32891 | 929  | G | A | 6   | 11 | --     | HB      |
|            | Ca(ICC2/PI489777)SNP_32892 | 1838 | A | G | 9   | 4  | --     | HB      |
|            | Ca(ICC2/PI489777)SNP_32893 | 1895 | A | G | 10  | 5  | --     | HB      |
|            | Ca(ICC2/PI489777)SNP_32894 | 2066 | G | A | 10  | 5  | --     | HB      |
|            | Ca(ICC2/PI489777)SNP_32895 | 2105 | A | C | 8   | 5  | --     | HB      |
| CakTC17443 | Ca(ICC2/PI489777)SNP_32896 | 1490 | C | T | 10  | 3  | --     | --      |
|            | Ca(ICC2/PI489777)SNP_32897 | 1604 | C | T | 10  | 5  | --     | --      |
|            | Ca(ICC2/PI489777)SNP_32898 | 2235 | T | A | 5   | 10 | --     | --      |
|            | Ca(ICC2/PI489777)SNP_32899 | 2695 | A | G | 13  | 11 | --     | --      |
|            | Ca(ICC2/PI489777)SNP_32900 | 3206 | T | C | 7   | 13 | --     | --      |
|            | Ca(ICC2/PI489777)SNP_32901 | 3401 | A | C | 12  | 11 | --     | --      |
|            | Ca(ICC2/PI489777)SNP_32902 | 3512 | A | C | 13  | 8  | --     | --      |
|            | Ca(ICC2/PI489777)SNP_32903 | 3644 | T | A | 11  | 7  | --     | --      |
|            | Ca(ICC2/PI489777)SNP_32904 | 3645 | G | T | 12  | 7  | --     | --      |
|            | Ca(ICC2/PI489777)SNP_32905 | 3704 | C | T | 10  | 5  | --     | --      |
|            | Ca(ICC2/PI489777)SNP_32906 | 3756 | T | A | 6   | 3  | --     | --      |
|            | Ca(ICC2/PI489777)SNP_32907 | 3767 | G | T | 5   | 3  | --     | --      |
| CakTC33968 | Ca(ICC2/PI489777)SNP_32908 | 1346 | T | G | 14  | 4  | --     | --      |
|            | Ca(ICC2/PI489777)SNP_32909 | 1490 | G | A | 16  | 5  | --     | --      |
|            | Ca(ICC2/PI489777)SNP_32910 | 1604 | G | A | 16  | 5  | --     | --      |
| CakTC04180 | Ca(ICC2/PI489777)SNP_32911 | 141  | A | G | 6   | 39 | --     | --      |
| CakTC04080 | Ca(ICC2/PI489777)SNP_32912 | 32   | C | T | 9   | 14 | --     | --      |
| CakTC23863 | Ca(ICC2/PI489777)SNP_32913 | 53   | G | A | 12  | 4  | --     | AUX/IAA |
|            | Ca(ICC2/PI489777)SNP_32914 | 125  | T | C | 13  | 6  | --     | AUX/IAA |
|            | Ca(ICC2/PI489777)SNP_32915 | 466  | C | T | 26  | 12 | --     | AUX/IAA |
| CakTC39851 | Ca(ICC2/PI489777)SNP_32916 | 996  | A | G | 4   | 3  | --     | --      |
| CakTC37284 | Ca(ICC2/PI489777)SNP_32917 | 558  | A | T | 135 | 58 | --     | --      |
|            | Ca(ICC2/PI489777)SNP_32918 | 617  | A | G | 125 | 60 | --     | --      |
|            | Ca(ICC2/PI489777)SNP_32919 | 716  | T | A | 159 | 70 | --     | --      |
| CakTC29395 | Ca(ICC2/PI489777)SNP_32920 | 574  | A | G | 9   | 4  | Flower | bud     |
| CakTC27655 | Ca(ICC2/PI489777)SNP_32921 | 214  | G | T | 7   | 5  | --     | ABI3VP1 |
| CakTC29949 | Ca(ICC2/PI489777)SNP_32922 | 1161 | G | T | 4   | 3  | --     | --      |
| CakTC22971 | Ca(ICC2/PI489777)SNP_32923 | 3381 | T | G | 6   | 4  | --     | --      |
| CakTC39538 | Ca(ICC2/PI489777)SNP_32924 | 1306 | G | A | 7   | 10 | --     | --      |
| CakTC23793 | Ca(ICC2/PI489777)SNP_32925 | 1345 | T | C | 10  | 10 | --     | --      |

|            |                            |      |   |   |    |    |    |    |
|------------|----------------------------|------|---|---|----|----|----|----|
|            | Ca(ICC2/PI489777)SNP_32926 | 1362 | C | T | 8  | 7  | -- | -- |
|            | Ca(ICC2/PI489777)SNP_32927 | 1420 | T | C | 9  | 8  | -- | -- |
| CakTC10068 | Ca(ICC2/PI489777)SNP_32928 | 433  | T | C | 4  | 3  | -- | -- |
| CakTC28042 | Ca(ICC2/PI489777)SNP_32929 | 199  | G | C | 5  | 4  | -- | -- |
|            | Ca(ICC2/PI489777)SNP_32930 | 237  | A | G | 5  | 4  | -- | -- |
|            | Ca(ICC2/PI489777)SNP_32931 | 313  | T | C | 4  | 4  | -- | -- |
|            | Ca(ICC2/PI489777)SNP_32932 | 649  | A | G | 12 | 3  | -- | -- |
| CakTC39699 | Ca(ICC2/PI489777)SNP_32933 | 120  | A | G | 3  | 11 | -- | -- |
| CakTC31029 | Ca(ICC2/PI489777)SNP_32934 | 450  | C | G | 8  | 3  | -- | -- |
|            | Ca(ICC2/PI489777)SNP_32935 | 533  | T | A | 6  | 4  | -- | -- |
|            | Ca(ICC2/PI489777)SNP_32936 | 804  | T | G | 7  | 3  | -- | -- |
|            | Ca(ICC2/PI489777)SNP_32937 | 1696 | T | C | 14 | 3  | -- | -- |
|            | Ca(ICC2/PI489777)SNP_32938 | 1828 | G | T | 13 | 6  | -- | -- |
|            | Ca(ICC2/PI489777)SNP_32939 | 2113 | G | A | 12 | 5  | -- | -- |
|            | Ca(ICC2/PI489777)SNP_32940 | 2248 | C | A | 19 | 5  | -- | -- |
|            | Ca(ICC2/PI489777)SNP_32941 | 2251 | A | T | 19 | 5  | -- | -- |
|            | Ca(ICC2/PI489777)SNP_32942 | 2323 | C | G | 18 | 4  | -- | -- |
| CakTC28577 | Ca(ICC2/PI489777)SNP_32943 | 436  | C | A | 12 | 8  | -- | -- |
|            | Ca(ICC2/PI489777)SNP_32944 | 504  | G | A | 14 | 8  | -- | -- |
|            | Ca(ICC2/PI489777)SNP_32945 | 531  | A | G | 13 | 7  | -- | -- |
|            | Ca(ICC2/PI489777)SNP_32946 | 1076 | G | A | 17 | 7  | -- | -- |
|            | Ca(ICC2/PI489777)SNP_32947 | 1218 | A | G | 15 | 6  | -- | -- |
|            | Ca(ICC2/PI489777)SNP_32948 | 1248 | C | T | 14 | 8  | -- | -- |
| CakTC28709 | Ca(ICC2/PI489777)SNP_32949 | 120  | C | T | 21 | 4  | -- | -- |
|            | Ca(ICC2/PI489777)SNP_32950 | 658  | T | A | 29 | 19 | -- | -- |
|            | Ca(ICC2/PI489777)SNP_32951 | 718  | G | A | 30 | 24 | -- | -- |
|            | Ca(ICC2/PI489777)SNP_32952 | 754  | C | T | 30 | 22 | -- | -- |
|            | Ca(ICC2/PI489777)SNP_32953 | 838  | T | C | 30 | 22 | -- | -- |
|            | Ca(ICC2/PI489777)SNP_32954 | 844  | G | C | 30 | 22 | -- | -- |
|            | Ca(ICC2/PI489777)SNP_32955 | 853  | G | A | 29 | 21 | -- | -- |
|            | Ca(ICC2/PI489777)SNP_32956 | 935  | T | C | 16 | 17 | -- | -- |
|            | Ca(ICC2/PI489777)SNP_32957 | 939  | C | A | 19 | 16 | -- | -- |
|            | Ca(ICC2/PI489777)SNP_32958 | 975  | C | G | 17 | 14 | -- | -- |
| CakTC24927 | Ca(ICC2/PI489777)SNP_32959 | 178  | G | A | 11 | 9  | -- | -- |
|            | Ca(ICC2/PI489777)SNP_32960 | 194  | C | T | 12 | 9  | -- | -- |
|            | Ca(ICC2/PI489777)SNP_32961 | 216  | A | G | 11 | 9  | -- | -- |
|            | Ca(ICC2/PI489777)SNP_32962 | 233  | T | C | 12 | 8  | -- | -- |
|            | Ca(ICC2/PI489777)SNP_32963 | 519  | G | A | 33 | 9  | -- | -- |
| CakTC34874 | Ca(ICC2/PI489777)SNP_32964 | 73   | A | C | 5  | 4  | -- | -- |
|            | Ca(ICC2/PI489777)SNP_32965 | 592  | A | G | 5  | 4  | -- | -- |
|            | Ca(ICC2/PI489777)SNP_32966 | 611  | C | G | 8  | 4  | -- | -- |
| CakTC32022 | Ca(ICC2/PI489777)SNP_32967 | 1919 | T | G | 5  | 3  | -- | -- |
| CakTC38604 | Ca(ICC2/PI489777)SNP_32968 | 165  | C | T | 20 | 7  | -- | -- |
|            | Ca(ICC2/PI489777)SNP_32969 | 355  | G | T | 60 | 5  | -- | -- |
|            | Ca(ICC2/PI489777)SNP_32970 | 363  | T | G | 61 | 5  | -- | -- |
|            | Ca(ICC2/PI489777)SNP_32971 | 383  | A | G | 46 | 8  | -- | -- |
|            | Ca(ICC2/PI489777)SNP_32972 | 684  | T | C | 49 | 12 | -- | -- |
|            | Ca(ICC2/PI489777)SNP_32973 | 695  | G | C | 55 | 11 | -- | -- |
|            | Ca(ICC2/PI489777)SNP_32974 | 773  | G | A | 64 | 8  | -- | -- |
|            | Ca(ICC2/PI489777)SNP_32975 | 801  | A | C | 66 | 9  | -- | -- |
|            | Ca(ICC2/PI489777)SNP_32976 | 813  | T | G | 67 | 7  | -- | -- |
|            | Ca(ICC2/PI489777)SNP_32977 | 918  | C | G | 71 | 4  | -- | -- |
|            | Ca(ICC2/PI489777)SNP_32978 | 930  | G | A | 67 | 4  | -- | -- |
|            | Ca(ICC2/PI489777)SNP_32979 | 1101 | C | T | 80 | 10 | -- | -- |
|            | Ca(ICC2/PI489777)SNP_32980 | 1292 | A | C | 57 | 11 | -- | -- |
|            | Ca(ICC2/PI489777)SNP_32981 | 1319 | C | G | 55 | 17 | -- | -- |
|            | Ca(ICC2/PI489777)SNP_32982 | 1388 | G | C | 39 | 14 | -- | -- |
|            | Ca(ICC2/PI489777)SNP_32983 | 1439 | G | A | 25 | 11 | -- | -- |
|            | Ca(ICC2/PI489777)SNP_32984 | 1494 | A | G | 23 | 12 | -- | -- |
|            | Ca(ICC2/PI489777)SNP_32985 | 1519 | T | C | 21 | 14 | -- | -- |
|            | Ca(ICC2/PI489777)SNP_32986 | 1527 | A | G | 21 | 14 | -- | -- |
|            | Ca(ICC2/PI489777)SNP_32987 | 1587 | G | A | 21 | 14 | -- | -- |
|            | Ca(ICC2/PI489777)SNP_32988 | 1616 | T | C | 14 | 14 | -- | -- |
|            | Ca(ICC2/PI489777)SNP_32989 | 1662 | T | G | 15 | 8  | -- | -- |
|            | Ca(ICC2/PI489777)SNP_32990 | 1664 | A | G | 14 | 8  | -- | -- |
| CakTC43313 | Ca(ICC2/PI489777)SNP_32991 | 824  | T | C | 5  | 3  | -- | -- |
|            | Ca(ICC2/PI489777)SNP_32992 | 1067 | C | T | 10 | 7  | -- | -- |
| CakTC06868 | Ca(ICC2/PI489777)SNP_32993 | 531  | G | C | 25 | 11 | -- | -- |
|            | Ca(ICC2/PI489777)SNP_32994 | 614  | G | T | 37 | 15 | -- | -- |
| CakTC27481 | Ca(ICC2/PI489777)SNP_32995 | 1884 | C | G | 8  | 3  | -- | -- |
|            | Ca(ICC2/PI489777)SNP_32996 | 1889 | A | G | 8  | 3  | -- | -- |
| CakTC29101 | Ca(ICC2/PI489777)SNP_32997 | 1435 | C | T | 11 | 3  | -- | -- |
|            | Ca(ICC2/PI489777)SNP_32998 | 1594 | A | G | 11 | 3  | -- | -- |
| CakTC39266 | Ca(ICC2/PI489777)SNP_32999 | 1026 | T | C | 6  | 11 | -- | -- |

|            |                            |      |   |   |     |    |    |         |
|------------|----------------------------|------|---|---|-----|----|----|---------|
| CakTC38966 | Ca(ICC2/PI489777)SNP_33000 | 1337 | A | G | 10  | 6  | -- | --      |
| CakTC37127 | Ca(ICC2/PI489777)SNP_33001 | 720  | G | C | 70  | 51 | -- | AUX/IAA |
| CakTC33988 | Ca(ICC2/PI489777)SNP_33002 | 965  | T | C | 113 | 51 | -- | --      |
|            | Ca(ICC2/PI489777)SNP_33003 | 1919 | G | A | 4   | 5  | -- | --      |
| CakTC39669 | Ca(ICC2/PI489777)SNP_33004 | 117  | T | A | 9   | 4  | -- | --      |
|            | Ca(ICC2/PI489777)SNP_33005 | 245  | T | C | 7   | 4  | -- | --      |
|            | Ca(ICC2/PI489777)SNP_33006 | 317  | A | C | 8   | 5  | -- | --      |
|            | Ca(ICC2/PI489777)SNP_33007 | 417  | A | G | 10  | 9  | -- | --      |
|            | Ca(ICC2/PI489777)SNP_33008 | 724  | G | A | 8   | 8  | -- | --      |
|            | Ca(ICC2/PI489777)SNP_33009 | 739  | C | A | 8   | 11 | -- | --      |
|            | Ca(ICC2/PI489777)SNP_33010 | 822  | G | C | 5   | 14 | -- | --      |
|            | Ca(ICC2/PI489777)SNP_33011 | 893  | A | C | 3   | 9  | -- | --      |
|            | Ca(ICC2/PI489777)SNP_33012 | 945  | T | C | 3   | 13 | -- | --      |
| CakTC41596 | Ca(ICC2/PI489777)SNP_33013 | 748  | A | G | 4   | 5  | -- | --      |
| CakTC38879 | Ca(ICC2/PI489777)SNP_33014 | 784  | A | G | 12  | 13 | -- | --      |
|            | Ca(ICC2/PI489777)SNP_33015 | 949  | A | C | 10  | 12 | -- | --      |
| CakTC41457 | Ca(ICC2/PI489777)SNP_33016 | 84   | A | G | 11  | 8  | -- | --      |
| CakTC37243 | Ca(ICC2/PI489777)SNP_33017 | 364  | A | G | 4   | 3  | -- | --      |
|            | Ca(ICC2/PI489777)SNP_33018 | 1551 | T | C | 29  | 14 | -- | --      |
|            | Ca(ICC2/PI489777)SNP_33019 | 1680 | C | A | 25  | 8  | -- | --      |
| CakTC35374 | Ca(ICC2/PI489777)SNP_33020 | 666  | T | C | 7   | 19 | -- | --      |
|            | Ca(ICC2/PI489777)SNP_33021 | 1211 | A | T | 22  | 22 | -- | --      |
|            | Ca(ICC2/PI489777)SNP_33022 | 1784 | A | G | 12  | 14 | -- | --      |
|            | Ca(ICC2/PI489777)SNP_33023 | 2703 | A | G | 13  | 5  | -- | --      |
|            | Ca(ICC2/PI489777)SNP_33024 | 3260 | C | A | 13  | 16 | -- | --      |
| CakTC29089 | Ca(ICC2/PI489777)SNP_33025 | 590  | G | A | 7   | 4  | -- | --      |
|            | Ca(ICC2/PI489777)SNP_33026 | 839  | A | G | 18  | 8  | -- | --      |
| CakTC38874 | Ca(ICC2/PI489777)SNP_33027 | 138  | G | T | 4   | 8  | -- | --      |
|            | Ca(ICC2/PI489777)SNP_33028 | 582  | G | A | 8   | 3  | -- | --      |
|            | Ca(ICC2/PI489777)SNP_33029 | 597  | T | A | 8   | 3  | -- | --      |
|            | Ca(ICC2/PI489777)SNP_33030 | 843  | G | C | 12  | 3  | -- | --      |
|            | Ca(ICC2/PI489777)SNP_33031 | 900  | C | A | 9   | 3  | -- | --      |
|            | Ca(ICC2/PI489777)SNP_33032 | 993  | A | G | 9   | 5  | -- | --      |
|            | Ca(ICC2/PI489777)SNP_33033 | 1059 | A | T | 11  | 5  | -- | --      |
|            | Ca(ICC2/PI489777)SNP_33034 | 1181 | G | A | 8   | 3  | -- | --      |
| CakTC34030 | Ca(ICC2/PI489777)SNP_33035 | 325  | C | T | 8   | 4  | -- | --      |
|            | Ca(ICC2/PI489777)SNP_33036 | 419  | T | C | 9   | 5  | -- | --      |
|            | Ca(ICC2/PI489777)SNP_33037 | 528  | T | G | 10  | 6  | -- | --      |
|            | Ca(ICC2/PI489777)SNP_33038 | 542  | T | C | 10  | 7  | -- | --      |
| CakTC24194 | Ca(ICC2/PI489777)SNP_33039 | 1269 | G | A | 21  | 11 | -- | TPR     |
|            | Ca(ICC2/PI489777)SNP_33040 | 1974 | A | C | 16  | 8  | -- | TPR     |
|            | Ca(ICC2/PI489777)SNP_33041 | 2438 | T | C | 14  | 3  | -- | TPR     |
| CakTC28038 | Ca(ICC2/PI489777)SNP_33042 | 262  | A | G | 5   | 4  | -- | --      |
|            | Ca(ICC2/PI489777)SNP_33043 | 299  | T | C | 4   | 4  | -- | --      |
|            | Ca(ICC2/PI489777)SNP_33044 | 451  | A | G | 4   | 3  | -- | --      |
| CakTC29122 | Ca(ICC2/PI489777)SNP_33045 | 565  | T | G | 6   | 9  | -- | --      |
|            | Ca(ICC2/PI489777)SNP_33046 | 676  | C | T | 9   | 6  | -- | --      |
|            | Ca(ICC2/PI489777)SNP_33047 | 877  | T | C | 31  | 22 | -- | --      |
|            | Ca(ICC2/PI489777)SNP_33048 | 904  | A | G | 33  | 27 | -- | --      |
|            | Ca(ICC2/PI489777)SNP_33049 | 1108 | A | G | 35  | 32 | -- | --      |
|            | Ca(ICC2/PI489777)SNP_33050 | 1363 | G | A | 18  | 14 | -- | --      |
|            | Ca(ICC2/PI489777)SNP_33051 | 1711 | T | G | 20  | 9  | -- | --      |
| CakTC42244 | Ca(ICC2/PI489777)SNP_33052 | 347  | C | T | 4   | 5  | -- | --      |
|            | Ca(ICC2/PI489777)SNP_33053 | 707  | C | A | 3   | 4  | -- | --      |
|            | Ca(ICC2/PI489777)SNP_33054 | 1072 | C | T | 3   | 8  | -- | --      |
|            | Ca(ICC2/PI489777)SNP_33055 | 1387 | T | C | 12  | 14 | -- | --      |
|            | Ca(ICC2/PI489777)SNP_33056 | 1546 | A | C | 5   | 19 | -- | --      |
| CakTC38472 | Ca(ICC2/PI489777)SNP_33057 | 745  | G | A | 18  | 6  | -- | --      |
|            | Ca(ICC2/PI489777)SNP_33058 | 926  | C | A | 11  | 4  | -- | --      |
|            | Ca(ICC2/PI489777)SNP_33059 | 960  | G | A | 9   | 5  | -- | --      |
| CakTC28400 | Ca(ICC2/PI489777)SNP_33060 | 148  | A | T | 8   | 4  | -- | --      |
|            | Ca(ICC2/PI489777)SNP_33061 | 326  | G | A | 21  | 4  | -- | --      |
|            | Ca(ICC2/PI489777)SNP_33062 | 380  | A | T | 18  | 6  | -- | --      |
|            | Ca(ICC2/PI489777)SNP_33063 | 395  | C | T | 18  | 3  | -- | --      |
|            | Ca(ICC2/PI489777)SNP_33064 | 766  | A | G | 13  | 7  | -- | --      |
|            | Ca(ICC2/PI489777)SNP_33065 | 2580 | G | A | 17  | 17 | -- | --      |
|            | Ca(ICC2/PI489777)SNP_33066 | 3674 | C | T | 17  | 8  | -- | --      |
|            | Ca(ICC2/PI489777)SNP_33067 | 4043 | C | T | 36  | 40 | -- | --      |
|            | Ca(ICC2/PI489777)SNP_33068 | 4052 | A | G | 26  | 22 | -- | --      |
|            | Ca(ICC2/PI489777)SNP_33069 | 4382 | T | A | 50  | 32 | -- | --      |
| CakTC41366 | Ca(ICC2/PI489777)SNP_33070 | 303  | A | G | 4   | 6  | -- | --      |
| CakTC09684 | Ca(ICC2/PI489777)SNP_33071 | 1044 | A | G | 8   | 3  | -- | --      |
| CakTC24150 | Ca(ICC2/PI489777)SNP_33072 | 1141 | T | C | 31  | 15 | -- | --      |
|            | Ca(ICC2/PI489777)SNP_33073 | 1204 | C | T | 18  | 12 | -- | --      |

|            |                            |      |   |   |    |    |           |       |
|------------|----------------------------|------|---|---|----|----|-----------|-------|
| CakTC30578 | Ca(ICC2/PI489777)SNP_33074 | 1059 | C | T | 6  | 4  | Young_pod | WRKY  |
| CakTC06168 | Ca(ICC2/PI489777)SNP_33075 | 153  | A | T | 17 | 5  | --        | CCAAT |
|            | Ca(ICC2/PI489777)SNP_33076 | 190  | T | G | 13 | 6  | --        | CCAAT |
|            | Ca(ICC2/PI489777)SNP_33077 | 211  | C | A | 17 | 6  | --        | CCAAT |
|            | Ca(ICC2/PI489777)SNP_33078 | 252  | C | T | 20 | 6  | --        | CCAAT |
| CakTC07842 | Ca(ICC2/PI489777)SNP_33079 | 857  | A | T | 3  | 3  | --        | --    |
| CakTC28758 | Ca(ICC2/PI489777)SNP_33080 | 88   | G | A | 13 | 4  | --        | --    |
|            | Ca(ICC2/PI489777)SNP_33081 | 150  | A | T | 11 | 10 | --        | --    |
|            | Ca(ICC2/PI489777)SNP_33082 | 171  | T | A | 19 | 11 | --        | --    |
|            | Ca(ICC2/PI489777)SNP_33083 | 432  | A | T | 61 | 34 | --        | --    |
|            | Ca(ICC2/PI489777)SNP_33084 | 623  | G | A | 79 | 43 | --        | --    |
| CakTC42101 | Ca(ICC2/PI489777)SNP_33085 | 585  | A | T | 11 | 9  | --        | --    |
|            | Ca(ICC2/PI489777)SNP_33086 | 726  | C | A | 14 | 10 | --        | --    |
|            | Ca(ICC2/PI489777)SNP_33087 | 757  | A | G | 12 | 9  | --        | --    |
|            | Ca(ICC2/PI489777)SNP_33088 | 883  | T | G | 8  | 7  | --        | --    |
| CakTC32508 | Ca(ICC2/PI489777)SNP_33089 | 177  | C | T | 12 | 28 | --        | --    |
|            | Ca(ICC2/PI489777)SNP_33090 | 275  | T | C | 16 | 33 | --        | --    |
| CakTC28711 | Ca(ICC2/PI489777)SNP_33091 | 341  | G | A | 21 | 15 | --        | FHA   |
|            | Ca(ICC2/PI489777)SNP_33092 | 1567 | C | T | 39 | 17 | --        | FHA   |
|            | Ca(ICC2/PI489777)SNP_33093 | 2132 | A | T | 20 | 19 | --        | FHA   |
|            | Ca(ICC2/PI489777)SNP_33094 | 2702 | C | T | 33 | 18 | --        | FHA   |
|            | Ca(ICC2/PI489777)SNP_33095 | 2714 | C | T | 34 | 23 | --        | FHA   |
| CakTC03608 | Ca(ICC2/PI489777)SNP_33096 | 746  | A | G | 6  | 4  | --        | --    |
|            | Ca(ICC2/PI489777)SNP_33097 | 1193 | G | A | 9  | 5  | --        | --    |
|            | Ca(ICC2/PI489777)SNP_33098 | 2894 | A | G | 7  | 4  | --        | --    |
| CakTC08248 | Ca(ICC2/PI489777)SNP_33099 | 239  | T | C | 7  | 5  | --        | --    |
|            | Ca(ICC2/PI489777)SNP_33100 | 269  | A | C | 7  | 5  | --        | --    |
|            | Ca(ICC2/PI489777)SNP_33101 | 335  | A | C | 8  | 7  | --        | --    |
|            | Ca(ICC2/PI489777)SNP_33102 | 1472 | T | C | 7  | 5  | --        | --    |
|            | Ca(ICC2/PI489777)SNP_33103 | 1511 | C | A | 7  | 5  | --        | --    |
| CakTC24359 | Ca(ICC2/PI489777)SNP_33104 | 684  | T | G | 6  | 3  | --        | --    |
| CakTC29254 | Ca(ICC2/PI489777)SNP_33105 | 516  | A | T | 8  | 6  | --        | --    |
| CakTC35836 | Ca(ICC2/PI489777)SNP_33106 | 416  | C | T | 9  | 12 | --        | --    |
|            | Ca(ICC2/PI489777)SNP_33107 | 896  | C | T | 13 | 4  | --        | --    |
|            | Ca(ICC2/PI489777)SNP_33108 | 1160 | A | G | 12 | 9  | --        | --    |
|            | Ca(ICC2/PI489777)SNP_33109 | 1616 | T | C | 10 | 3  | --        | --    |
|            | Ca(ICC2/PI489777)SNP_33110 | 1916 | C | G | 7  | 9  | --        | --    |
|            | Ca(ICC2/PI489777)SNP_33111 | 2291 | A | G | 6  | 9  | --        | --    |
| CakTC40649 | Ca(ICC2/PI489777)SNP_33112 | 86   | A | C | 16 | 5  | --        | --    |
|            | Ca(ICC2/PI489777)SNP_33113 | 1559 | G | T | 12 | 13 | --        | --    |
| CakTC38083 | Ca(ICC2/PI489777)SNP_33114 | 488  | C | T | 14 | 6  | Root      | --    |
|            | Ca(ICC2/PI489777)SNP_33115 | 690  | G | A | 22 | 14 | Root      | --    |
|            | Ca(ICC2/PI489777)SNP_33116 | 1036 | G | A | 7  | 6  | Root      | --    |
| CakTC13055 | Ca(ICC2/PI489777)SNP_33117 | 436  | G | T | 11 | 3  | --        | --    |
|            | Ca(ICC2/PI489777)SNP_33118 | 529  | C | G | 8  | 9  | --        | --    |
|            | Ca(ICC2/PI489777)SNP_33119 | 562  | A | G | 8  | 8  | --        | --    |
|            | Ca(ICC2/PI489777)SNP_33120 | 682  | A | G | 7  | 6  | --        | --    |
| CakTC25873 | Ca(ICC2/PI489777)SNP_33121 | 566  | T | C | 22 | 23 | --        | --    |
|            | Ca(ICC2/PI489777)SNP_33122 | 679  | G | T | 16 | 22 | --        | --    |
|            | Ca(ICC2/PI489777)SNP_33123 | 707  | T | A | 19 | 23 | --        | --    |
|            | Ca(ICC2/PI489777)SNP_33124 | 803  | A | T | 15 | 16 | --        | --    |
|            | Ca(ICC2/PI489777)SNP_33125 | 841  | G | T | 4  | 14 | --        | --    |
| CakTC11610 | Ca(ICC2/PI489777)SNP_33126 | 22   | G | A | 4  | 3  | --        | --    |
|            | Ca(ICC2/PI489777)SNP_33127 | 184  | T | C | 10 | 4  | --        | --    |
|            | Ca(ICC2/PI489777)SNP_33128 | 683  | T | A | 14 | 8  | --        | --    |
|            | Ca(ICC2/PI489777)SNP_33129 | 701  | A | G | 14 | 8  | --        | --    |
|            | Ca(ICC2/PI489777)SNP_33130 | 797  | A | G | 14 | 7  | --        | --    |
|            | Ca(ICC2/PI489777)SNP_33131 | 902  | T | G | 7  | 6  | --        | --    |
|            | Ca(ICC2/PI489777)SNP_33132 | 904  | A | T | 7  | 6  | --        | --    |
| CakTC23786 | Ca(ICC2/PI489777)SNP_33133 | 1355 | T | C | 9  | 5  | --        | --    |
| CakTC34344 | Ca(ICC2/PI489777)SNP_33134 | 164  | C | T | 47 | 34 | --        | --    |
| CakTC27725 | Ca(ICC2/PI489777)SNP_33135 | 10   | C | T | 3  | 6  | --        | MADS  |
|            | Ca(ICC2/PI489777)SNP_33136 | 387  | G | A | 7  | 17 | --        | MADS  |
|            | Ca(ICC2/PI489777)SNP_33137 | 567  | T | C | 4  | 13 | --        | MADS  |
| CakTC15249 | Ca(ICC2/PI489777)SNP_33138 | 819  | C | T | 3  | 3  | --        | --    |
| CakTC28208 | Ca(ICC2/PI489777)SNP_33139 | 150  | C | T | 4  | 5  | --        | --    |
|            | Ca(ICC2/PI489777)SNP_33140 | 196  | G | A | 15 | 12 | --        | --    |
|            | Ca(ICC2/PI489777)SNP_33141 | 223  | C | G | 18 | 12 | --        | --    |
|            | Ca(ICC2/PI489777)SNP_33142 | 821  | T | C | 29 | 17 | --        | --    |
|            | Ca(ICC2/PI489777)SNP_33143 | 895  | G | T | 32 | 17 | --        | --    |
|            | Ca(ICC2/PI489777)SNP_33144 | 941  | T | C | 34 | 17 | --        | --    |
|            | Ca(ICC2/PI489777)SNP_33145 | 1151 | A | T | 22 | 6  | --        | --    |
|            | Ca(ICC2/PI489777)SNP_33146 | 1744 | A | G | 9  | 3  | --        | --    |
| CakTC26875 | Ca(ICC2/PI489777)SNP_33147 | 158  | C | A | 4  | 10 | --        | --    |



|            |                             |      |   |   |     |     |           |           |
|------------|-----------------------------|------|---|---|-----|-----|-----------|-----------|
| CakTC37690 | Ca(ICCV2/PI489777)SNP_33148 | 183  | C | T | 17  | 13  | --        | --        |
|            | Ca(ICCV2/PI489777)SNP_33149 | 579  | A | T | 26  | 17  | --        | --        |
|            | Ca(ICCV2/PI489777)SNP_33150 | 631  | G | C | 20  | 16  | --        | --        |
| CakTC36506 | Ca(ICCV2/PI489777)SNP_33151 | 1921 | T | C | 4   | 5   | --        | --        |
|            | Ca(ICCV2/PI489777)SNP_33152 | 1986 | C | G | 5   | 8   | --        | --        |
|            | Ca(ICCV2/PI489777)SNP_33153 | 2156 | A | G | 7   | 7   | --        | --        |
|            | Ca(ICCV2/PI489777)SNP_33154 | 2579 | T | C | 4   | 7   | --        | --        |
| CakTC29479 | Ca(ICCV2/PI489777)SNP_33155 | 30   | G | A | 16  | 3   | --        | --        |
|            | Ca(ICCV2/PI489777)SNP_33156 | 723  | G | A | 248 | 211 | --        | --        |
|            | Ca(ICCV2/PI489777)SNP_33157 | 759  | A | G | 228 | 171 | --        | --        |
| CakTC29229 | Ca(ICCV2/PI489777)SNP_33158 | 894  | A | C | 64  | 40  | --        | --        |
|            | Ca(ICCV2/PI489777)SNP_33159 | 1825 | A | G | 21  | 11  | --        | --        |
| CakTC40411 | Ca(ICCV2/PI489777)SNP_33160 | 1218 | G | A | 16  | 5   | --        | --        |
|            | Ca(ICCV2/PI489777)SNP_33161 | 1482 | G | A | 22  | 12  | --        | --        |
| CakTC26817 | Ca(ICCV2/PI489777)SNP_33162 | 464  | G | A | 19  | 6   | --        | --        |
|            | Ca(ICCV2/PI489777)SNP_33163 | 511  | C | T | 20  | 6   | --        | --        |
|            | Ca(ICCV2/PI489777)SNP_33164 | 826  | A | G | 25  | 15  | --        | --        |
|            | Ca(ICCV2/PI489777)SNP_33165 | 907  | G | A | 19  | 15  | --        | --        |
|            | Ca(ICCV2/PI489777)SNP_33166 | 1087 | T | C | 22  | 10  | --        | --        |
|            | Ca(ICCV2/PI489777)SNP_33167 | 1198 | A | G | 17  | 35  | --        | --        |
|            | Ca(ICCV2/PI489777)SNP_33168 | 1279 | C | T | 14  | 8   | --        | --        |
|            | Ca(ICCV2/PI489777)SNP_33169 | 1285 | A | G | 14  | 9   | --        | --        |
|            | Ca(ICCV2/PI489777)SNP_33170 | 1555 | C | T | 14  | 10  | --        | --        |
|            | Ca(ICCV2/PI489777)SNP_33171 | 1951 | A | G | 18  | 13  | --        | --        |
|            | Ca(ICCV2/PI489777)SNP_33172 | 2032 | G | A | 16  | 12  | --        | --        |
| CakTC22631 | Ca(ICCV2/PI489777)SNP_33173 | 783  | T | C | 3   | 3   | --        | --        |
|            | Ca(ICCV2/PI489777)SNP_33174 | 936  | C | T | 9   | 4   | --        | --        |
|            | Ca(ICCV2/PI489777)SNP_33175 | 1042 | T | C | 10  | 4   | --        | --        |
|            | Ca(ICCV2/PI489777)SNP_33176 | 1052 | C | G | 9   | 4   | --        | --        |
|            | Ca(ICCV2/PI489777)SNP_33177 | 1118 | C | T | 8   | 4   | --        | --        |
|            | Ca(ICCV2/PI489777)SNP_33178 | 1501 | T | A | 3   | 4   | --        | --        |
|            | Ca(ICCV2/PI489777)SNP_33179 | 1508 | G | A | 3   | 3   | --        | --        |
|            | Ca(ICCV2/PI489777)SNP_33180 | 2332 | G | A | 4   | 6   | --        | --        |
| CakTC40611 | Ca(ICCV2/PI489777)SNP_33181 | 523  | G | A | 30  | 34  | --        | --        |
|            | Ca(ICCV2/PI489777)SNP_33182 | 873  | T | C | 53  | 20  | --        | --        |
|            | Ca(ICCV2/PI489777)SNP_33183 | 1914 | A | G | 20  | 4   | --        | --        |
| CakTC35097 | Ca(ICCV2/PI489777)SNP_33184 | 165  | C | T | 6   | 9   | --        | --        |
|            | Ca(ICCV2/PI489777)SNP_33185 | 341  | G | A | 8   | 10  | --        | --        |
|            | Ca(ICCV2/PI489777)SNP_33186 | 526  | G | A | 8   | 6   | --        | --        |
|            | Ca(ICCV2/PI489777)SNP_33187 | 762  | C | G | 9   | 7   | --        | --        |
|            | Ca(ICCV2/PI489777)SNP_33188 | 1512 | G | A | 11  | 4   | --        | --        |
|            | Ca(ICCV2/PI489777)SNP_33189 | 1824 | G | A | 17  | 14  | --        | --        |
|            | Ca(ICCV2/PI489777)SNP_33190 | 2600 | G | A | 6   | 3   | --        | --        |
|            | Ca(ICCV2/PI489777)SNP_33191 | 2687 | G | A | 5   | 3   | --        | --        |
| CakTC31150 | Ca(ICCV2/PI489777)SNP_33192 | 661  | T | C | 11  | 6   | Young_pod | --        |
|            | Ca(ICCV2/PI489777)SNP_33193 | 712  | T | C | 8   | 4   | Young_pod | --        |
| CakTC23119 | Ca(ICCV2/PI489777)SNP_33194 | 1022 | T | G | 18  | 12  | --        | --        |
|            | Ca(ICCV2/PI489777)SNP_33195 | 1041 | C | G | 16  | 12  | --        | --        |
| CakTC03234 | Ca(ICCV2/PI489777)SNP_33196 | 239  | T | A | 12  | 15  | --        | --        |
|            | Ca(ICCV2/PI489777)SNP_33197 | 243  | A | T | 12  | 15  | --        | --        |
|            | Ca(ICCV2/PI489777)SNP_33198 | 1066 | G | T | 21  | 4   | --        | --        |
|            | Ca(ICCV2/PI489777)SNP_33199 | 1068 | T | C | 19  | 3   | --        | --        |
|            | Ca(ICCV2/PI489777)SNP_33200 | 1084 | C | T | 24  | 3   | --        | --        |
| CakTC39500 | Ca(ICCV2/PI489777)SNP_33201 | 184  | A | T | 3   | 8   | --        | --        |
|            | Ca(ICCV2/PI489777)SNP_33202 | 250  | A | G | 5   | 8   | --        | --        |
|            | Ca(ICCV2/PI489777)SNP_33203 | 376  | T | C | 6   | 7   | --        | --        |
|            | Ca(ICCV2/PI489777)SNP_33204 | 484  | G | A | 5   | 6   | --        | --        |
|            | Ca(ICCV2/PI489777)SNP_33205 | 1194 | G | A | 4   | 6   | --        | --        |
| CakTC41505 | Ca(ICCV2/PI489777)SNP_33206 | 628  | A | T | 44  | 20  | --        | --        |
|            | Ca(ICCV2/PI489777)SNP_33207 | 691  | A | G | 27  | 16  | --        | --        |
| CakTC27837 | Ca(ICCV2/PI489777)SNP_33208 | 818  | C | G | 10  | 10  | --        | --        |
|            | Ca(ICCV2/PI489777)SNP_33209 | 1008 | T | G | 13  | 7   | --        | --        |
|            | Ca(ICCV2/PI489777)SNP_33210 | 1064 | A | C | 14  | 8   | --        | --        |
|            | Ca(ICCV2/PI489777)SNP_33211 | 1253 | A | T | 15  | 4   | --        | --        |
| CakTC29725 | Ca(ICCV2/PI489777)SNP_33212 | 874  | G | A | 10  | 7   | --        | --        |
| CakTC23554 | Ca(ICCV2/PI489777)SNP_33213 | 278  | T | G | 89  | 35  | --        | AP2-EREBP |
|            | Ca(ICCV2/PI489777)SNP_33214 | 506  | C | A | 141 | 63  | --        | AP2-EREBP |
|            | Ca(ICCV2/PI489777)SNP_33215 | 669  | G | A | 128 | 63  | --        | AP2-EREBP |
|            | Ca(ICCV2/PI489777)SNP_33216 | 675  | C | T | 126 | 63  | --        | AP2-EREBP |
|            | Ca(ICCV2/PI489777)SNP_33217 | 745  | C | G | 128 | 67  | --        | AP2-EREBP |
|            | Ca(ICCV2/PI489777)SNP_33218 | 786  | T | G | 124 | 62  | --        | AP2-EREBP |
|            | Ca(ICCV2/PI489777)SNP_33219 | 792  | C | T | 116 | 63  | --        | AP2-EREBP |
|            | Ca(ICCV2/PI489777)SNP_33220 | 813  | T | C | 112 | 61  | --        | AP2-EREBP |
|            | Ca(ICCV2/PI489777)SNP_33221 | 1144 | G | C | 130 | 77  | --        | AP2-EREBP |

|            |                            |      |   |   |     |     |           |             |
|------------|----------------------------|------|---|---|-----|-----|-----------|-------------|
| CakTC04731 | Ca(ICC2/P1489777)SNP_33222 | 153  | A | T | 4   | 4   | --        | --          |
| CakTC27731 | Ca(ICC2/P1489777)SNP_33223 | 174  | C | G | 9   | 3   | --        | --          |
|            | Ca(ICC2/P1489777)SNP_33224 | 404  | T | A | 12  | 4   | --        | --          |
| CakTC16592 | Ca(ICC2/P1489777)SNP_33225 | 61   | C | T | 7   | 3   | --        | --          |
|            | Ca(ICC2/P1489777)SNP_33226 | 125  | T | G | 7   | 3   | --        | --          |
| CakTC38912 | Ca(ICC2/P1489777)SNP_33227 | 508  | G | C | 5   | 3   | --        | --          |
|            | Ca(ICC2/P1489777)SNP_33228 | 725  | A | T | 5   | 3   | --        | --          |
|            | Ca(ICC2/P1489777)SNP_33229 | 1024 | G | A | 4   | 5   | --        | --          |
| CakTC34439 | Ca(ICC2/P1489777)SNP_33230 | 323  | T | C | 12  | 6   | --        | --          |
|            | Ca(ICC2/P1489777)SNP_33231 | 962  | T | C | 23  | 8   | --        | --          |
|            | Ca(ICC2/P1489777)SNP_33232 | 1388 | G | C | 35  | 13  | --        | --          |
|            | Ca(ICC2/P1489777)SNP_33233 | 1391 | T | C | 37  | 14  | --        | --          |
|            | Ca(ICC2/P1489777)SNP_33234 | 1493 | T | C | 37  | 19  | --        | --          |
|            | Ca(ICC2/P1489777)SNP_33235 | 1619 | C | T | 34  | 17  | --        | --          |
|            | Ca(ICC2/P1489777)SNP_33236 | 1656 | A | G | 28  | 16  | --        | --          |
|            | Ca(ICC2/P1489777)SNP_33237 | 1674 | T | C | 28  | 15  | --        | --          |
|            | Ca(ICC2/P1489777)SNP_33238 | 1718 | C | T | 22  | 12  | --        | --          |
|            | Ca(ICC2/P1489777)SNP_33239 | 1720 | C | T | 22  | 13  | --        | --          |
|            | Ca(ICC2/P1489777)SNP_33240 | 1758 | T | C | 17  | 9   | --        | --          |
|            | Ca(ICC2/P1489777)SNP_33241 | 1760 | G | T | 16  | 9   | --        | --          |
|            | Ca(ICC2/P1489777)SNP_33242 | 1801 | G | T | 13  | 6   | --        | --          |
|            | Ca(ICC2/P1489777)SNP_33243 | 1810 | C | T | 14  | 6   | --        | --          |
| CakTC30461 | Ca(ICC2/P1489777)SNP_33244 | 426  | A | G | 3   | 4   | --        | --          |
|            | Ca(ICC2/P1489777)SNP_33245 | 438  | A | T | 4   | 4   | --        | --          |
| CakTC40392 | Ca(ICC2/P1489777)SNP_33246 | 504  | G | C | 3   | 5   | --        | MYB-related |
| CakTC09725 | Ca(ICC2/P1489777)SNP_33247 | 933  | T | G | 3   | 3   | --        | --          |
|            | Ca(ICC2/P1489777)SNP_33248 | 964  | G | C | 3   | 3   | --        | --          |
|            | Ca(ICC2/P1489777)SNP_33249 | 1101 | G | A | 3   | 3   | --        | --          |
| CakTC27220 | Ca(ICC2/P1489777)SNP_33250 | 48   | G | A | 3   | 8   | --        | --          |
|            | Ca(ICC2/P1489777)SNP_33251 | 116  | C | T | 5   | 9   | --        | --          |
|            | Ca(ICC2/P1489777)SNP_33252 | 1840 | T | C | 10  | 5   | --        | --          |
| CakTC31195 | Ca(ICC2/P1489777)SNP_33253 | 296  | T | C | 9   | 5   | --        | --          |
|            | Ca(ICC2/P1489777)SNP_33254 | 779  | C | T | 8   | 3   | --        | --          |
| CakTC38425 | Ca(ICC2/P1489777)SNP_33255 | 70   | A | T | 73  | 48  | --        | --          |
|            | Ca(ICC2/P1489777)SNP_33256 | 450  | C | G | 101 | 113 | --        | --          |
|            | Ca(ICC2/P1489777)SNP_33257 | 516  | A | G | 99  | 95  | --        | --          |
|            | Ca(ICC2/P1489777)SNP_33258 | 1106 | T | A | 3   | 8   | --        | --          |
| CakTC39528 | Ca(ICC2/P1489777)SNP_33259 | 173  | C | A | 14  | 3   | --        | --          |
|            | Ca(ICC2/P1489777)SNP_33260 | 174  | G | A | 15  | 3   | --        | --          |
|            | Ca(ICC2/P1489777)SNP_33261 | 820  | G | C | 8   | 6   | --        | --          |
| CakTC33251 | Ca(ICC2/P1489777)SNP_33262 | 124  | A | G | 4   | 5   | --        | --          |
| CakTC26316 | Ca(ICC2/P1489777)SNP_33263 | 1504 | T | C | 15  | 3   | --        | --          |
|            | Ca(ICC2/P1489777)SNP_33264 | 1967 | G | A | 9   | 6   | --        | --          |
|            | Ca(ICC2/P1489777)SNP_33265 | 2084 | C | T | 10  | 4   | --        | --          |
| CakTC35393 | Ca(ICC2/P1489777)SNP_33266 | 1949 | T | C | 44  | 23  | --        | --          |
|            | Ca(ICC2/P1489777)SNP_33267 | 2477 | T | C | 38  | 24  | --        | --          |
|            | Ca(ICC2/P1489777)SNP_33268 | 2657 | C | T | 38  | 30  | --        | --          |
| CakTC40065 | Ca(ICC2/P1489777)SNP_33269 | 749  | C | A | 5   | 6   | --        | --          |
|            | Ca(ICC2/P1489777)SNP_33270 | 910  | G | T | 4   | 5   | --        | --          |
|            | Ca(ICC2/P1489777)SNP_33271 | 914  | A | T | 4   | 5   | --        | --          |
| CakTC39802 | Ca(ICC2/P1489777)SNP_33272 | 842  | G | T | 14  | 10  | --        | --          |
| CakTC35142 | Ca(ICC2/P1489777)SNP_33273 | 2886 | C | T | 13  | 3   | --        | --          |
| CakTC25063 | Ca(ICC2/P1489777)SNP_33274 | 457  | C | G | 31  | 23  | --        | --          |
|            | Ca(ICC2/P1489777)SNP_33275 | 847  | C | T | 19  | 28  | --        | --          |
|            | Ca(ICC2/P1489777)SNP_33276 | 1360 | G | A | 42  | 26  | --        | --          |
|            | Ca(ICC2/P1489777)SNP_33277 | 1503 | G | T | 59  | 34  | --        | --          |
|            | Ca(ICC2/P1489777)SNP_33278 | 1504 | A | T | 59  | 34  | --        | --          |
|            | Ca(ICC2/P1489777)SNP_33279 | 1669 | T | C | 57  | 29  | --        | --          |
|            | Ca(ICC2/P1489777)SNP_33280 | 2291 | T | C | 15  | 5   | --        | --          |
|            | Ca(ICC2/P1489777)SNP_33281 | 2318 | C | T | 10  | 5   | --        | --          |
|            | Ca(ICC2/P1489777)SNP_33282 | 2569 | G | A | 12  | 13  | --        | --          |
| CakTC32413 | Ca(ICC2/P1489777)SNP_33283 | 496  | C | G | 16  | 27  | Young_pod | --          |
|            | Ca(ICC2/P1489777)SNP_33284 | 653  | A | G | 12  | 26  | Young_pod | --          |
|            | Ca(ICC2/P1489777)SNP_33285 | 2021 | T | C | 12  | 17  | Young_pod | --          |
|            | Ca(ICC2/P1489777)SNP_33286 | 2206 | A | G | 12  | 12  | Young_pod | --          |
| CakTC12351 | Ca(ICC2/P1489777)SNP_33287 | 149  | C | A | 3   | 23  | --        | --          |
|            | Ca(ICC2/P1489777)SNP_33288 | 691  | C | T | 5   | 7   | --        | --          |
| CakTC25884 | Ca(ICC2/P1489777)SNP_33289 | 636  | A | G | 15  | 10  | Young_pod | --          |
|            | Ca(ICC2/P1489777)SNP_33290 | 849  | T | A | 7   | 5   | Young_pod | --          |
| CakTC40468 | Ca(ICC2/P1489777)SNP_33291 | 1752 | G | C | 24  | 27  | --        | --          |
| CakTC35874 | Ca(ICC2/P1489777)SNP_33292 | 584  | A | C | 4   | 3   | --        | --          |
|            | Ca(ICC2/P1489777)SNP_33293 | 731  | G | A | 3   | 3   | --        | --          |
|            | Ca(ICC2/P1489777)SNP_33294 | 1821 | G | T | 4   | 3   | --        | --          |
|            | Ca(ICC2/P1489777)SNP_33295 | 1884 | T | G | 3   | 3   | --        | --          |

|            |                            |      |   |   |     |    |        |      |
|------------|----------------------------|------|---|---|-----|----|--------|------|
| CakTC40864 | Ca(ICC2/PI489777)SNP_33296 | 269  | C | T | 4   | 5  | --     | --   |
|            | Ca(ICC2/PI489777)SNP_33297 | 296  | T | C | 4   | 5  | --     | --   |
|            | Ca(ICC2/PI489777)SNP_33298 | 586  | G | A | 3   | 4  | --     | --   |
| CakTC37583 | Ca(ICC2/PI489777)SNP_33299 | 999  | T | C | 15  | 10 | --     | --   |
| CakTC28910 | Ca(ICC2/PI489777)SNP_33300 | 1081 | G | T | 6   | 3  | --     | --   |
| CakTC40735 | Ca(ICC2/PI489777)SNP_33301 | 1252 | C | T | 15  | 4  | --     | --   |
|            | Ca(ICC2/PI489777)SNP_33302 | 1363 | A | G | 12  | 3  | --     | --   |
|            | Ca(ICC2/PI489777)SNP_33303 | 1426 | C | T | 13  | 4  | --     | --   |
| CakTC27998 | Ca(ICC2/PI489777)SNP_33304 | 226  | A | G | 4   | 3  | --     | --   |
|            | Ca(ICC2/PI489777)SNP_33305 | 245  | G | A | 4   | 3  | --     | --   |
|            | Ca(ICC2/PI489777)SNP_33306 | 252  | A | T | 4   | 3  | --     | --   |
| CakTC27843 | Ca(ICC2/PI489777)SNP_33307 | 1465 | G | T | 3   | 4  | --     | --   |
| CakTC43030 | Ca(ICC2/PI489777)SNP_33308 | 157  | T | C | 4   | 3  | Flower | bud  |
|            | Ca(ICC2/PI489777)SNP_33309 | 220  | G | C | 4   | 5  | Flower | bud  |
|            | Ca(ICC2/PI489777)SNP_33310 | 823  | G | A | 7   | 3  | Flower | bud  |
| CakTC10899 | Ca(ICC2/PI489777)SNP_33311 | 1237 | T | C | 12  | 8  | --     | --   |
| CakTC42080 | Ca(ICC2/PI489777)SNP_33312 | 882  | G | A | 4   | 5  | --     | --   |
| CakTC29589 | Ca(ICC2/PI489777)SNP_33313 | 467  | G | T | 7   | 9  | --     | --   |
| CakTC39399 | Ca(ICC2/PI489777)SNP_33314 | 360  | T | C | 6   | 6  | --     | --   |
|            | Ca(ICC2/PI489777)SNP_33315 | 431  | A | T | 6   | 6  | --     | --   |
|            | Ca(ICC2/PI489777)SNP_33316 | 992  | A | C | 11  | 3  | --     | --   |
|            | Ca(ICC2/PI489777)SNP_33317 | 1076 | C | T | 10  | 6  | --     | --   |
| CakTC33395 | Ca(ICC2/PI489777)SNP_33318 | 57   | A | G | 7   | 11 | --     | --   |
|            | Ca(ICC2/PI489777)SNP_33319 | 283  | A | G | 17  | 22 | --     | --   |
|            | Ca(ICC2/PI489777)SNP_33320 | 304  | T | A | 13  | 19 | --     | --   |
|            | Ca(ICC2/PI489777)SNP_33321 | 325  | T | A | 17  | 23 | --     | --   |
|            | Ca(ICC2/PI489777)SNP_33322 | 331  | G | A | 17  | 18 | --     | --   |
|            | Ca(ICC2/PI489777)SNP_33323 | 424  | A | G | 17  | 21 | --     | --   |
| CakTC11461 | Ca(ICC2/PI489777)SNP_33324 | 349  | T | C | 14  | 20 | --     | --   |
| CakTC09808 | Ca(ICC2/PI489777)SNP_33325 | 1162 | T | A | 13  | 3  | --     | --   |
| CakTC39352 | Ca(ICC2/PI489777)SNP_33326 | 1384 | G | A | 16  | 6  | --     | --   |
|            | Ca(ICC2/PI489777)SNP_33327 | 1580 | C | T | 20  | 3  | --     | --   |
|            | Ca(ICC2/PI489777)SNP_33328 | 1666 | G | A | 18  | 3  | --     | --   |
| CakTC42988 | Ca(ICC2/PI489777)SNP_33329 | 108  | C | T | 4   | 5  | --     | --   |
|            | Ca(ICC2/PI489777)SNP_33330 | 677  | C | T | 30  | 14 | --     | --   |
| CakTC27974 | Ca(ICC2/PI489777)SNP_33331 | 1062 | C | T | 3   | 3  | --     | --   |
| CakTC39190 | Ca(ICC2/PI489777)SNP_33332 | 357  | A | G | 6   | 7  | --     | --   |
|            | Ca(ICC2/PI489777)SNP_33333 | 630  | A | C | 5   | 10 | --     | --   |
|            | Ca(ICC2/PI489777)SNP_33334 | 1033 | C | T | 6   | 6  | --     | --   |
|            | Ca(ICC2/PI489777)SNP_33335 | 1394 | T | A | 4   | 5  | --     | --   |
|            | Ca(ICC2/PI489777)SNP_33336 | 1445 | T | G | 4   | 6  | --     | --   |
|            | Ca(ICC2/PI489777)SNP_33337 | 1464 | G | A | 4   | 3  | --     | --   |
| CakTC24473 | Ca(ICC2/PI489777)SNP_33338 | 875  | T | C | 138 | 41 | --     | --   |
|            | Ca(ICC2/PI489777)SNP_33339 | 1316 | G | A | 67  | 22 | --     | --   |
| CakTC28192 | Ca(ICC2/PI489777)SNP_33340 | 339  | A | G | 9   | 3  | --     | --   |
|            | Ca(ICC2/PI489777)SNP_33341 | 377  | A | C | 9   | 3  | --     | --   |
|            | Ca(ICC2/PI489777)SNP_33342 | 558  | C | T | 7   | 6  | --     | --   |
|            | Ca(ICC2/PI489777)SNP_33343 | 1170 | C | T | 26  | 11 | --     | --   |
| CakTC38056 | Ca(ICC2/PI489777)SNP_33344 | 1163 | G | A | 3   | 5  | --     | --   |
| CakTC24056 | Ca(ICC2/PI489777)SNP_33345 | 771  | T | C | 5   | 5  | --     | --   |
| CakTC41923 | Ca(ICC2/PI489777)SNP_33346 | 407  | G | A | 3   | 12 | --     | --   |
|            | Ca(ICC2/PI489777)SNP_33347 | 458  | T | C | 3   | 19 | --     | --   |
| CakTC35977 | Ca(ICC2/PI489777)SNP_33348 | 4175 | C | G | 5   | 3  | Flower | bud  |
|            | Ca(ICC2/PI489777)SNP_33349 | 4261 | T | C | 5   | 5  | Flower | bud  |
| CakTC29989 | Ca(ICC2/PI489777)SNP_33350 | 619  | G | C | 19  | 5  | --     | GRAS |
|            | Ca(ICC2/PI489777)SNP_33351 | 625  | G | C | 18  | 4  | --     | GRAS |
|            | Ca(ICC2/PI489777)SNP_33352 | 847  | A | G | 7   | 4  | --     | GRAS |
|            | Ca(ICC2/PI489777)SNP_33353 | 958  | G | C | 6   | 3  | --     | GRAS |
|            | Ca(ICC2/PI489777)SNP_33354 | 1243 | T | C | 27  | 10 | --     | GRAS |
|            | Ca(ICC2/PI489777)SNP_33355 | 2445 | C | G | 13  | 5  | --     | GRAS |
|            | Ca(ICC2/PI489777)SNP_33356 | 2451 | C | T | 13  | 6  | --     | GRAS |
| CakTC42076 | Ca(ICC2/PI489777)SNP_33357 | 90   | C | T | 13  | 15 | --     | --   |
| CakTC27036 | Ca(ICC2/PI489777)SNP_33358 | 315  | T | C | 9   | 9  | --     | --   |
|            | Ca(ICC2/PI489777)SNP_33359 | 378  | C | T | 10  | 8  | --     | --   |
|            | Ca(ICC2/PI489777)SNP_33360 | 381  | C | T | 10  | 8  | --     | --   |
|            | Ca(ICC2/PI489777)SNP_33361 | 390  | C | T | 10  | 8  | --     | --   |
|            | Ca(ICC2/PI489777)SNP_33362 | 395  | A | G | 11  | 8  | --     | --   |
|            | Ca(ICC2/PI489777)SNP_33363 | 1176 | A | G | 5   | 4  | --     | --   |
| CakTC43115 | Ca(ICC2/PI489777)SNP_33364 | 834  | T | A | 10  | 7  | Root   | HB   |
|            | Ca(ICC2/PI489777)SNP_33365 | 836  | G | C | 9   | 10 | Root   | HB   |
|            | Ca(ICC2/PI489777)SNP_33366 | 872  | G | T | 10  | 10 | Root   | HB   |
| CakTC27631 | Ca(ICC2/PI489777)SNP_33367 | 759  | C | T | 3   | 3  | --     | --   |
|            | Ca(ICC2/PI489777)SNP_33368 | 1723 | C | T | 5   | 8  | --     | --   |
| CakTC25210 | Ca(ICC2/PI489777)SNP_33369 | 672  | A | G | 17  | 9  | --     | --   |

|            |                            |      |   |   |    |    |      |     |
|------------|----------------------------|------|---|---|----|----|------|-----|
|            | Ca(ICC2/PI489777)SNP_33370 | 691  | T | C | 17 | 10 | --   | --  |
| CakTC38436 | Ca(ICC2/PI489777)SNP_33371 | 303  | C | T | 7  | 9  | --   | --  |
|            | Ca(ICC2/PI489777)SNP_33372 | 336  | T | C | 7  | 10 | --   | --  |
|            | Ca(ICC2/PI489777)SNP_33373 | 487  | G | A | 10 | 15 | --   | --  |
|            | Ca(ICC2/PI489777)SNP_33374 | 532  | A | G | 10 | 13 | --   | --  |
|            | Ca(ICC2/PI489777)SNP_33375 | 1115 | A | T | 8  | 11 | --   | --  |
|            | Ca(ICC2/PI489777)SNP_33376 | 1371 | G | A | 5  | 5  | --   | --  |
|            | Ca(ICC2/PI489777)SNP_33377 | 1572 | C | G | 3  | 3  | --   | --  |
| CakTC39725 | Ca(ICC2/PI489777)SNP_33378 | 57   | A | G | 3  | 10 | --   | --  |
|            | Ca(ICC2/PI489777)SNP_33379 | 247  | T | A | 12 | 12 | --   | --  |
| CakTC11727 | Ca(ICC2/PI489777)SNP_33380 | 93   | G | C | 10 | 5  | --   | --  |
|            | Ca(ICC2/PI489777)SNP_33381 | 116  | A | T | 10 | 11 | --   | --  |
| CakTC38169 | Ca(ICC2/PI489777)SNP_33382 | 412  | A | G | 23 | 5  | --   | --  |
| CakTC32402 | Ca(ICC2/PI489777)SNP_33383 | 543  | A | G | 43 | 45 | --   | TPR |
|            | Ca(ICC2/PI489777)SNP_33384 | 642  | C | T | 53 | 49 | --   | TPR |
|            | Ca(ICC2/PI489777)SNP_33385 | 1595 | A | C | 32 | 59 | --   | TPR |
|            | Ca(ICC2/PI489777)SNP_33386 | 1995 | A | G | 31 | 27 | --   | TPR |
| CakTC42901 | Ca(ICC2/PI489777)SNP_33387 | 132  | G | T | 4  | 8  | Root | --  |
|            | Ca(ICC2/PI489777)SNP_33388 | 190  | G | C | 4  | 12 | Root | --  |
|            | Ca(ICC2/PI489777)SNP_33389 | 689  | G | C | 5  | 7  | Root | --  |
| CakTC22256 | Ca(ICC2/PI489777)SNP_33390 | 1487 | A | G | 29 | 19 | --   | --  |
| CakTC23851 | Ca(ICC2/PI489777)SNP_33391 | 749  | T | C | 13 | 12 | --   | --  |
|            | Ca(ICC2/PI489777)SNP_33392 | 773  | C | A | 12 | 15 | --   | --  |
|            | Ca(ICC2/PI489777)SNP_33393 | 1265 | G | A | 6  | 14 | --   | --  |
|            | Ca(ICC2/PI489777)SNP_33394 | 2056 | A | G | 4  | 6  | --   | --  |
|            | Ca(ICC2/PI489777)SNP_33395 | 2123 | C | A | 3  | 4  | --   | --  |
| CakTC42108 | Ca(ICC2/PI489777)SNP_33396 | 150  | A | G | 6  | 4  | --   | --  |
|            | Ca(ICC2/PI489777)SNP_33397 | 635  | C | T | 11 | 3  | --   | --  |
|            | Ca(ICC2/PI489777)SNP_33398 | 661  | A | C | 9  | 3  | --   | --  |
|            | Ca(ICC2/PI489777)SNP_33399 | 1552 | A | G | 9  | 10 | --   | --  |
|            | Ca(ICC2/PI489777)SNP_33400 | 1565 | G | A | 8  | 10 | --   | --  |
|            | Ca(ICC2/PI489777)SNP_33401 | 1567 | C | T | 8  | 10 | --   | --  |
|            | Ca(ICC2/PI489777)SNP_33402 | 1598 | G | A | 6  | 8  | --   | --  |
| CakTC22793 | Ca(ICC2/PI489777)SNP_33403 | 395  | C | A | 34 | 6  | --   | --  |
|            | Ca(ICC2/PI489777)SNP_33404 | 523  | A | T | 34 | 6  | --   | --  |
|            | Ca(ICC2/PI489777)SNP_33405 | 609  | C | T | 34 | 6  | --   | --  |
|            | Ca(ICC2/PI489777)SNP_33406 | 658  | A | C | 28 | 6  | --   | --  |
|            | Ca(ICC2/PI489777)SNP_33407 | 1117 | A | C | 49 | 5  | --   | --  |
| CakTC30259 | Ca(ICC2/PI489777)SNP_33408 | 837  | C | T | 18 | 9  | --   | --  |
|            | Ca(ICC2/PI489777)SNP_33409 | 1038 | A | T | 14 | 5  | --   | --  |
| CakTC41080 | Ca(ICC2/PI489777)SNP_33410 | 162  | A | T | 14 | 8  | --   | --  |
|            | Ca(ICC2/PI489777)SNP_33411 | 193  | T | C | 13 | 9  | --   | --  |
|            | Ca(ICC2/PI489777)SNP_33412 | 217  | G | A | 12 | 11 | --   | --  |
|            | Ca(ICC2/PI489777)SNP_33413 | 282  | G | A | 22 | 10 | --   | --  |
|            | Ca(ICC2/PI489777)SNP_33414 | 501  | G | A | 35 | 30 | --   | --  |
|            | Ca(ICC2/PI489777)SNP_33415 | 510  | T | C | 34 | 28 | --   | --  |
|            | Ca(ICC2/PI489777)SNP_33416 | 712  | A | T | 22 | 23 | --   | --  |
| CakTC28536 | Ca(ICC2/PI489777)SNP_33417 | 928  | T | G | 22 | 10 | --   | NAC |
| CakTC25613 | Ca(ICC2/PI489777)SNP_33418 | 2141 | G | T | 5  | 3  | --   | --  |
|            | Ca(ICC2/PI489777)SNP_33419 | 3225 | A | G | 3  | 4  | --   | --  |
| CakTC16219 | Ca(ICC2/PI489777)SNP_33420 | 1375 | C | T | 4  | 4  | --   | --  |
|            | Ca(ICC2/PI489777)SNP_33421 | 1409 | A | T | 3  | 3  | --   | --  |
| CakTC34364 | Ca(ICC2/PI489777)SNP_33422 | 242  | T | G | 3  | 5  | --   | --  |
|            | Ca(ICC2/PI489777)SNP_33423 | 696  | C | T | 18 | 7  | --   | --  |
|            | Ca(ICC2/PI489777)SNP_33424 | 963  | A | G | 24 | 18 | --   | --  |
|            | Ca(ICC2/PI489777)SNP_33425 | 1014 | A | G | 24 | 20 | --   | --  |
|            | Ca(ICC2/PI489777)SNP_33426 | 1104 | C | T | 30 | 22 | --   | --  |
|            | Ca(ICC2/PI489777)SNP_33427 | 1427 | G | A | 27 | 8  | --   | --  |
| CakTC33994 | Ca(ICC2/PI489777)SNP_33428 | 887  | G | C | 9  | 4  | --   | --  |
|            | Ca(ICC2/PI489777)SNP_33429 | 897  | C | T | 9  | 4  | --   | --  |
|            | Ca(ICC2/PI489777)SNP_33430 | 919  | C | T | 9  | 5  | --   | --  |
|            | Ca(ICC2/PI489777)SNP_33431 | 1013 | G | A | 9  | 5  | --   | --  |
| CakTC31511 | Ca(ICC2/PI489777)SNP_33432 | 652  | G | T | 7  | 4  | --   | --  |
|            | Ca(ICC2/PI489777)SNP_33433 | 843  | A | G | 5  | 3  | --   | --  |
|            | Ca(ICC2/PI489777)SNP_33434 | 1117 | T | C | 4  | 4  | --   | --  |
|            | Ca(ICC2/PI489777)SNP_33435 | 1874 | T | C | 8  | 4  | --   | --  |
| CakTC36056 | Ca(ICC2/PI489777)SNP_33436 | 558  | T | A | 6  | 3  | --   | --  |
| CakTC40204 | Ca(ICC2/PI489777)SNP_33437 | 795  | A | G | 34 | 10 | --   | --  |
|            | Ca(ICC2/PI489777)SNP_33438 | 877  | C | G | 31 | 10 | --   | --  |
|            | Ca(ICC2/PI489777)SNP_33439 | 891  | T | A | 34 | 10 | --   | --  |
|            | Ca(ICC2/PI489777)SNP_33440 | 933  | T | C | 29 | 6  | --   | --  |
|            | Ca(ICC2/PI489777)SNP_33441 | 998  | T | C | 24 | 9  | --   | --  |
|            | Ca(ICC2/PI489777)SNP_33442 | 1167 | T | C | 11 | 4  | --   | --  |
|            | Ca(ICC2/PI489777)SNP_33443 | 1389 | G | A | 5  | 3  | --   | --  |

|            |                             |      |   |   |    |    |    |      |
|------------|-----------------------------|------|---|---|----|----|----|------|
| CakTC38038 | Ca(ICCV2/PI489777)SNP_33444 | 247  | G | A | 73 | 10 | -- | --   |
| CakTC34535 | Ca(ICCV2/PI489777)SNP_33445 | 242  | C | T | 4  | 5  | -- | --   |
| CakTC34715 | Ca(ICCV2/PI489777)SNP_33446 | 306  | T | C | 11 | 10 | -- | --   |
|            | Ca(ICCV2/PI489777)SNP_33447 | 453  | T | C | 9  | 11 | -- | --   |
|            | Ca(ICCV2/PI489777)SNP_33448 | 1020 | A | A | 15 | 5  | -- | --   |
|            | Ca(ICCV2/PI489777)SNP_33449 | 1746 | G | A | 16 | 8  | -- | --   |
|            | Ca(ICCV2/PI489777)SNP_33450 | 2172 | T | C | 18 | 18 | -- | --   |
|            | Ca(ICCV2/PI489777)SNP_33451 | 2556 | T | A | 27 | 13 | -- | --   |
|            | Ca(ICCV2/PI489777)SNP_33452 | 2649 | G | C | 26 | 7  | -- | --   |
|            | Ca(ICCV2/PI489777)SNP_33453 | 3015 | T | C | 25 | 17 | -- | --   |
|            | Ca(ICCV2/PI489777)SNP_33454 | 3027 | T | C | 27 | 17 | -- | --   |
| CakTC10314 | Ca(ICCV2/PI489777)SNP_33455 | 1127 | G | T | 18 | 20 | -- | --   |
| CakTC23991 | Ca(ICCV2/PI489777)SNP_33456 | 1117 | G | C | 4  | 5  | -- | --   |
| CakTC31274 | Ca(ICCV2/PI489777)SNP_33457 | 952  | G | C | 3  | 3  | -- | --   |
|            | Ca(ICCV2/PI489777)SNP_33458 | 1095 | A | G | 4  | 3  | -- | --   |
|            | Ca(ICCV2/PI489777)SNP_33459 | 1115 | G | T | 4  | 3  | -- | --   |
|            | Ca(ICCV2/PI489777)SNP_33460 | 1119 | T | G | 4  | 3  | -- | --   |
|            | Ca(ICCV2/PI489777)SNP_33461 | 1165 | A | C | 3  | 3  | -- | --   |
|            | Ca(ICCV2/PI489777)SNP_33462 | 1169 | C | G | 3  | 3  | -- | --   |
| CakTC34412 | Ca(ICCV2/PI489777)SNP_33463 | 892  | G | C | 13 | 13 | -- | --   |
|            | Ca(ICCV2/PI489777)SNP_33464 | 1216 | C | G | 6  | 21 | -- | --   |
|            | Ca(ICCV2/PI489777)SNP_33465 | 1290 | A | T | 9  | 18 | -- | --   |
|            | Ca(ICCV2/PI489777)SNP_33466 | 1417 | C | G | 7  | 19 | -- | --   |
| CakTC38609 | Ca(ICCV2/PI489777)SNP_33467 | 462  | A | G | 4  | 8  | -- | --   |
|            | Ca(ICCV2/PI489777)SNP_33468 | 655  | T | C | 8  | 4  | -- | --   |
|            | Ca(ICCV2/PI489777)SNP_33469 | 937  | T | C | 10 | 14 | -- | --   |
|            | Ca(ICCV2/PI489777)SNP_33470 | 1229 | C | A | 18 | 10 | -- | --   |
|            | Ca(ICCV2/PI489777)SNP_33471 | 1300 | G | A | 17 | 7  | -- | --   |
|            | Ca(ICCV2/PI489777)SNP_33472 | 1360 | C | T | 20 | 4  | -- | --   |
|            | Ca(ICCV2/PI489777)SNP_33473 | 1446 | G | A | 15 | 3  | -- | --   |
|            | Ca(ICCV2/PI489777)SNP_33474 | 1447 | A | G | 15 | 3  | -- | --   |
|            | Ca(ICCV2/PI489777)SNP_33475 | 1513 | T | A | 11 | 3  | -- | --   |
| CakTC31043 | Ca(ICCV2/PI489777)SNP_33476 | 300  | A | C | 5  | 3  | -- | --   |
| CakTC40399 | Ca(ICCV2/PI489777)SNP_33477 | 422  | T | C | 10 | 3  | -- | bHLH |
|            | Ca(ICCV2/PI489777)SNP_33478 | 428  | A | G | 10 | 3  | -- | bHLH |
|            | Ca(ICCV2/PI489777)SNP_33479 | 504  | A | T | 12 | 3  | -- | bHLH |
|            | Ca(ICCV2/PI489777)SNP_33480 | 508  | C | A | 13 | 4  | -- | bHLH |
|            | Ca(ICCV2/PI489777)SNP_33481 | 668  | G | A | 17 | 4  | -- | bHLH |
|            | Ca(ICCV2/PI489777)SNP_33482 | 695  | A | T | 18 | 4  | -- | bHLH |
|            | Ca(ICCV2/PI489777)SNP_33483 | 782  | C | G | 15 | 4  | -- | bHLH |
|            | Ca(ICCV2/PI489777)SNP_33484 | 1000 | G | C | 15 | 4  | -- | bHLH |
|            | Ca(ICCV2/PI489777)SNP_33485 | 1193 | C | G | 12 | 4  | -- | bHLH |
|            | Ca(ICCV2/PI489777)SNP_33486 | 1649 | G | T | 4  | 10 | -- | bHLH |
|            | Ca(ICCV2/PI489777)SNP_33487 | 1718 | T | A | 6  | 9  | -- | bHLH |
|            | Ca(ICCV2/PI489777)SNP_33488 | 1771 | T | A | 5  | 8  | -- | bHLH |
|            | Ca(ICCV2/PI489777)SNP_33489 | 1826 | G | A | 6  | 8  | -- | bHLH |
| CakTC35680 | Ca(ICCV2/PI489777)SNP_33490 | 1812 | A | G | 8  | 3  | -- | --   |
|            | Ca(ICCV2/PI489777)SNP_33491 | 2700 | G | A | 5  | 8  | -- | --   |
|            | Ca(ICCV2/PI489777)SNP_33492 | 2949 | A | G | 5  | 9  | -- | --   |
| CakTC29875 | Ca(ICCV2/PI489777)SNP_33493 | 628  | C | T | 3  | 7  | -- | --   |
|            | Ca(ICCV2/PI489777)SNP_33494 | 670  | C | T | 4  | 7  | -- | --   |
|            | Ca(ICCV2/PI489777)SNP_33495 | 721  | C | T | 4  | 7  | -- | --   |
|            | Ca(ICCV2/PI489777)SNP_33496 | 1689 | T | C | 4  | 4  | -- | --   |
|            | Ca(ICCV2/PI489777)SNP_33497 | 2053 | G | T | 5  | 8  | -- | --   |
|            | Ca(ICCV2/PI489777)SNP_33498 | 2342 | T | C | 5  | 8  | -- | --   |
|            | Ca(ICCV2/PI489777)SNP_33499 | 2375 | G | A | 5  | 8  | -- | --   |
| CakTC25079 | Ca(ICCV2/PI489777)SNP_33500 | 2216 | G | C | 19 | 26 | -- | --   |
| CakTC12234 | Ca(ICCV2/PI489777)SNP_33501 | 1506 | A | G | 11 | 4  | -- | --   |
| CakTC26381 | Ca(ICCV2/PI489777)SNP_33502 | 396  | A | T | 4  | 5  | -- | --   |
|            | Ca(ICCV2/PI489777)SNP_33503 | 403  | T | C | 3  | 5  | -- | --   |
|            | Ca(ICCV2/PI489777)SNP_33504 | 754  | T | C | 10 | 7  | -- | --   |
|            | Ca(ICCV2/PI489777)SNP_33505 | 860  | G | C | 12 | 4  | -- | --   |
|            | Ca(ICCV2/PI489777)SNP_33506 | 1313 | C | T | 15 | 6  | -- | --   |
| CakTC09286 | Ca(ICCV2/PI489777)SNP_33507 | 157  | A | G | 4  | 3  | -- | --   |
| CakTC09877 | Ca(ICCV2/PI489777)SNP_33508 | 1236 | T | C | 15 | 8  | -- | --   |
| CakTC26165 | Ca(ICCV2/PI489777)SNP_33509 | 682  | G | C | 6  | 5  | -- | --   |
|            | Ca(ICCV2/PI489777)SNP_33510 | 720  | A | G | 7  | 6  | -- | --   |
|            | Ca(ICCV2/PI489777)SNP_33511 | 1637 | G | A | 11 | 3  | -- | --   |
|            | Ca(ICCV2/PI489777)SNP_33512 | 1881 | T | A | 8  | 4  | -- | --   |
|            | Ca(ICCV2/PI489777)SNP_33513 | 2763 | A | G | 18 | 11 | -- | --   |
|            | Ca(ICCV2/PI489777)SNP_33514 | 3201 | T | C | 10 | 6  | -- | --   |
|            | Ca(ICCV2/PI489777)SNP_33515 | 3357 | T | C | 11 | 3  | -- | --   |
| CakTC30297 | Ca(ICCV2/PI489777)SNP_33516 | 542  | G | C | 37 | 95 | -- | --   |
| CakTC07909 | Ca(ICCV2/PI489777)SNP_33517 | 385  | G | C | 3  | 3  | -- | --   |

|            |                            |      |   |   |    |    |           |          |
|------------|----------------------------|------|---|---|----|----|-----------|----------|
|            | Ca(ICC2/PI489777)SNP_33518 | 386  | T | A | 3  | 3  | --        | --       |
| CakTC27593 | Ca(ICC2/PI489777)SNP_33519 | 1374 | T | C | 6  | 8  | --        | --       |
| CakTC41589 | Ca(ICC2/PI489777)SNP_33520 | 406  | G | A | 27 | 18 | --        | --       |
| CakTC09143 | Ca(ICC2/PI489777)SNP_33521 | 1166 | A | G | 6  | 3  | --        | --       |
| CakTC31442 | Ca(ICC2/PI489777)SNP_33522 | 234  | T | A | 3  | 3  | --        | --       |
|            | Ca(ICC2/PI489777)SNP_33523 | 1450 | C | T | 10 | 4  | --        | --       |
|            | Ca(ICC2/PI489777)SNP_33524 | 2257 | G | T | 6  | 9  | --        | --       |
|            | Ca(ICC2/PI489777)SNP_33525 | 2454 | C | T | 4  | 11 | --        | --       |
|            | Ca(ICC2/PI489777)SNP_33526 | 2566 | C | T | 6  | 16 | --        | --       |
|            | Ca(ICC2/PI489777)SNP_33527 | 3085 | A | G | 3  | 8  | --        | --       |
|            | Ca(ICC2/PI489777)SNP_33528 | 3206 | A | G | 6  | 11 | --        | --       |
| CakTC41690 | Ca(ICC2/PI489777)SNP_33529 | 137  | G | A | 17 | 26 | --        | --       |
|            | Ca(ICC2/PI489777)SNP_33530 | 352  | C | T | 18 | 23 | --        | --       |
| CakTC29910 | Ca(ICC2/PI489777)SNP_33531 | 334  | G | A | 19 | 6  | --        | --       |
|            | Ca(ICC2/PI489777)SNP_33532 | 496  | G | C | 11 | 3  | --        | --       |
|            | Ca(ICC2/PI489777)SNP_33533 | 502  | A | G | 9  | 3  | --        | --       |
|            | Ca(ICC2/PI489777)SNP_33534 | 2110 | C | T | 9  | 5  | --        | --       |
|            | Ca(ICC2/PI489777)SNP_33535 | 2158 | C | A | 13 | 8  | --        | --       |
|            | Ca(ICC2/PI489777)SNP_33536 | 2338 | G | A | 11 | 9  | --        | --       |
|            | Ca(ICC2/PI489777)SNP_33537 | 2598 | A | G | 6  | 7  | --        | --       |
|            | Ca(ICC2/PI489777)SNP_33538 | 2637 | G | C | 7  | 7  | --        | --       |
|            | Ca(ICC2/PI489777)SNP_33539 | 2643 | A | G | 8  | 7  | --        | --       |
|            | Ca(ICC2/PI489777)SNP_33540 | 2695 | G | A | 7  | 3  | --        | --       |
| CakTC39469 | Ca(ICC2/PI489777)SNP_33541 | 167  | T | G | 5  | 30 | --        | --       |
|            | Ca(ICC2/PI489777)SNP_33542 | 200  | C | T | 4  | 30 | --        | --       |
|            | Ca(ICC2/PI489777)SNP_33543 | 230  | C | T | 5  | 30 | --        | --       |
| CakTC35805 | Ca(ICC2/PI489777)SNP_33544 | 388  | C | T | 8  | 6  | --        | Jumonji  |
|            | Ca(ICC2/PI489777)SNP_33545 | 1212 | T | C | 6  | 4  | --        | Jumonji  |
|            | Ca(ICC2/PI489777)SNP_33546 | 1973 | T | C | 4  | 3  | --        | Jumonji  |
| CakTC28542 | Ca(ICC2/PI489777)SNP_33547 | 146  | T | C | 23 | 17 | --        | --       |
| CakTC39423 | Ca(ICC2/PI489777)SNP_33548 | 548  | A | G | 4  | 3  | --        | --       |
|            | Ca(ICC2/PI489777)SNP_33549 | 1077 | G | C | 8  | 3  | --        | --       |
| CakTC41888 | Ca(ICC2/PI489777)SNP_33550 | 970  | G | C | 24 | 20 | --        | --       |
|            | Ca(ICC2/PI489777)SNP_33551 | 1020 | T | C | 29 | 14 | --        | --       |
|            | Ca(ICC2/PI489777)SNP_33552 | 1606 | T | G | 13 | 23 | --        | --       |
| CakTC41945 | Ca(ICC2/PI489777)SNP_33553 | 679  | T | A | 4  | 6  | --        | C2C2-Dof |
|            | Ca(ICC2/PI489777)SNP_33554 | 680  | G | A | 4  | 6  | --        | C2C2-Dof |
| CakTC42144 | Ca(ICC2/PI489777)SNP_33555 | 275  | G | C | 10 | 17 | --        | --       |
|            | Ca(ICC2/PI489777)SNP_33556 | 324  | T | C | 11 | 21 | --        | --       |
|            | Ca(ICC2/PI489777)SNP_33557 | 325  | T | A | 11 | 21 | --        | --       |
|            | Ca(ICC2/PI489777)SNP_33558 | 375  | A | C | 12 | 21 | --        | --       |
|            | Ca(ICC2/PI489777)SNP_33559 | 863  | C | T | 17 | 16 | --        | --       |
|            | Ca(ICC2/PI489777)SNP_33560 | 1123 | A | G | 5  | 5  | --        | --       |
| CakTC23647 | Ca(ICC2/PI489777)SNP_33561 | 148  | C | T | 5  | 3  | --        | --       |
|            | Ca(ICC2/PI489777)SNP_33562 | 1916 | C | T | 4  | 3  | --        | --       |
|            | Ca(ICC2/PI489777)SNP_33563 | 5363 | T | C | 5  | 5  | --        | --       |
|            | Ca(ICC2/PI489777)SNP_33564 | 8310 | G | A | 7  | 6  | --        | --       |
| CakTC28531 | Ca(ICC2/PI489777)SNP_33565 | 146  | C | G | 24 | 13 | --        | --       |
|            | Ca(ICC2/PI489777)SNP_33566 | 355  | T | C | 54 | 17 | --        | --       |
|            | Ca(ICC2/PI489777)SNP_33567 | 572  | A | G | 20 | 5  | --        | --       |
| CakTC31010 | Ca(ICC2/PI489777)SNP_33568 | 154  | T | C | 9  | 3  | --        | --       |
| CakTC41544 | Ca(ICC2/PI489777)SNP_33569 | 916  | G | A | 8  | 8  | --        | --       |
|            | Ca(ICC2/PI489777)SNP_33570 | 1359 | G | T | 21 | 5  | --        | --       |
| CakTC42173 | Ca(ICC2/PI489777)SNP_33571 | 95   | T | A | 12 | 6  | --        | MADS     |
|            | Ca(ICC2/PI489777)SNP_33572 | 169  | G | A | 22 | 26 | --        | MADS     |
|            | Ca(ICC2/PI489777)SNP_33573 | 280  | C | T | 24 | 34 | --        | MADS     |
|            | Ca(ICC2/PI489777)SNP_33574 | 779  | G | A | 21 | 30 | --        | MADS     |
|            | Ca(ICC2/PI489777)SNP_33575 | 829  | T | C | 20 | 25 | --        | MADS     |
| CakTC13070 | Ca(ICC2/PI489777)SNP_33576 | 220  | G | C | 12 | 4  | Mature    | Leaf     |
|            | Ca(ICC2/PI489777)SNP_33577 | 824  | T | C | 30 | 4  | Mature    | Leaf     |
| CakTC09184 | Ca(ICC2/PI489777)SNP_33578 | 95   | T | C | 3  | 6  | --        | --       |
|            | Ca(ICC2/PI489777)SNP_33579 | 174  | G | A | 10 | 6  | --        | --       |
|            | Ca(ICC2/PI489777)SNP_33580 | 1100 | A | G | 8  | 7  | --        | --       |
| CakTC10885 | Ca(ICC2/PI489777)SNP_33581 | 943  | T | C | 6  | 4  | --        | --       |
| CakTC03961 | Ca(ICC2/PI489777)SNP_33582 | 529  | C | A | 4  | 3  | Young_pod | --       |
| CakTC39578 | Ca(ICC2/PI489777)SNP_33583 | 1338 | T | A | 9  | 5  | --        | --       |
| CakTC35419 | Ca(ICC2/PI489777)SNP_33584 | 321  | T | C | 12 | 9  | --        | --       |
|            | Ca(ICC2/PI489777)SNP_33585 | 673  | A | G | 16 | 11 | --        | --       |
|            | Ca(ICC2/PI489777)SNP_33586 | 901  | T | C | 21 | 6  | --        | --       |
|            | Ca(ICC2/PI489777)SNP_33587 | 1021 | A | G | 16 | 8  | --        | --       |
|            | Ca(ICC2/PI489777)SNP_33588 | 1258 | A | G | 20 | 17 | --        | --       |
|            | Ca(ICC2/PI489777)SNP_33589 | 1381 | G | A | 17 | 7  | --        | --       |
|            | Ca(ICC2/PI489777)SNP_33590 | 2056 | C | T | 24 | 7  | --        | --       |
|            | Ca(ICC2/PI489777)SNP_33591 | 2071 | G | A | 26 | 7  | --        | --       |

|            |                            |      |   |   |     |     |    |      |
|------------|----------------------------|------|---|---|-----|-----|----|------|
|            | Ca(ICC2/PI489777)SNP_33592 | 2677 | A | T | 14  | 8   | -- | --   |
|            | Ca(ICC2/PI489777)SNP_33593 | 2978 | T | G | 10  | 6   | -- | --   |
|            | Ca(ICC2/PI489777)SNP_33594 | 3065 | A | G | 6   | 6   | -- | --   |
| CakTC10272 | Ca(ICC2/PI489777)SNP_33595 | 97   | C | A | 13  | 7   | -- | --   |
|            | Ca(ICC2/PI489777)SNP_33596 | 256  | T | G | 23  | 6   | -- | --   |
|            | Ca(ICC2/PI489777)SNP_33597 | 316  | C | T | 19  | 5   | -- | --   |
| CakTC25552 | Ca(ICC2/PI489777)SNP_33598 | 439  | G | A | 17  | 18  | -- | --   |
|            | Ca(ICC2/PI489777)SNP_33599 | 796  | T | A | 10  | 17  | -- | --   |
| CakTC09675 | Ca(ICC2/PI489777)SNP_33600 | 197  | T | C | 7   | 6   | -- | --   |
|            | Ca(ICC2/PI489777)SNP_33601 | 461  | C | T | 13  | 6   | -- | --   |
|            | Ca(ICC2/PI489777)SNP_33602 | 473  | T | C | 13  | 6   | -- | --   |
|            | Ca(ICC2/PI489777)SNP_33603 | 527  | C | G | 13  | 6   | -- | --   |
|            | Ca(ICC2/PI489777)SNP_33604 | 576  | G | C | 12  | 3   | -- | --   |
|            | Ca(ICC2/PI489777)SNP_33605 | 584  | C | T | 12  | 3   | -- | --   |
|            | Ca(ICC2/PI489777)SNP_33606 | 685  | C | T | 5   | 3   | -- | --   |
|            | Ca(ICC2/PI489777)SNP_33607 | 694  | T | C | 10  | 4   | -- | --   |
| CakTC42434 | Ca(ICC2/PI489777)SNP_33608 | 61   | T | C | 4   | 4   | -- | --   |
|            | Ca(ICC2/PI489777)SNP_33609 | 275  | C | T | 4   | 6   | -- | --   |
|            | Ca(ICC2/PI489777)SNP_33610 | 344  | C | T | 6   | 5   | -- | --   |
|            | Ca(ICC2/PI489777)SNP_33611 | 611  | A | T | 5   | 8   | -- | --   |
|            | Ca(ICC2/PI489777)SNP_33612 | 884  | A | T | 5   | 14  | -- | --   |
|            | Ca(ICC2/PI489777)SNP_33613 | 935  | T | C | 8   | 15  | -- | --   |
| CakTC36381 | Ca(ICC2/PI489777)SNP_33614 | 59   | C | A | 30  | 14  | -- | --   |
| CakTC04338 | Ca(ICC2/PI489777)SNP_33615 | 1075 | T | C | 8   | 3   | -- | --   |
| CakTC34045 | Ca(ICC2/PI489777)SNP_33616 | 1647 | C | A | 8   | 5   | -- | --   |
|            | Ca(ICC2/PI489777)SNP_33617 | 2067 | G | C | 4   | 3   | -- | --   |
| CakTC42556 | Ca(ICC2/PI489777)SNP_33618 | 109  | C | T | 10  | 12  | -- | --   |
|            | Ca(ICC2/PI489777)SNP_33619 | 292  | C | T | 16  | 12  | -- | --   |
|            | Ca(ICC2/PI489777)SNP_33620 | 304  | C | G | 20  | 15  | -- | --   |
|            | Ca(ICC2/PI489777)SNP_33621 | 340  | C | T | 19  | 17  | -- | --   |
|            | Ca(ICC2/PI489777)SNP_33622 | 358  | C | T | 21  | 16  | -- | --   |
|            | Ca(ICC2/PI489777)SNP_33623 | 379  | T | C | 23  | 16  | -- | --   |
|            | Ca(ICC2/PI489777)SNP_33624 | 565  | G | A | 24  | 6   | -- | --   |
|            | Ca(ICC2/PI489777)SNP_33625 | 1037 | C | A | 40  | 33  | -- | --   |
| CakTC25783 | Ca(ICC2/PI489777)SNP_33626 | 1263 | G | A | 5   | 6   | -- | --   |
|            | Ca(ICC2/PI489777)SNP_33627 | 1281 | T | C | 5   | 7   | -- | --   |
| CakTC37850 | Ca(ICC2/PI489777)SNP_33628 | 534  | A | C | 11  | 10  | -- | bZIP |
|            | Ca(ICC2/PI489777)SNP_33629 | 605  | A | G | 22  | 13  | -- | bZIP |
|            | Ca(ICC2/PI489777)SNP_33630 | 857  | C | T | 21  | 14  | -- | bZIP |
| CakTC26622 | Ca(ICC2/PI489777)SNP_33631 | 142  | C | T | 9   | 3   | -- | --   |
|            | Ca(ICC2/PI489777)SNP_33632 | 231  | A | G | 14  | 4   | -- | --   |
|            | Ca(ICC2/PI489777)SNP_33633 | 255  | T | C | 14  | 4   | -- | --   |
|            | Ca(ICC2/PI489777)SNP_33634 | 315  | T | G | 13  | 4   | -- | --   |
|            | Ca(ICC2/PI489777)SNP_33635 | 699  | T | A | 9   | 5   | -- | --   |
|            | Ca(ICC2/PI489777)SNP_33636 | 712  | G | C | 12  | 5   | -- | --   |
|            | Ca(ICC2/PI489777)SNP_33637 | 1270 | A | T | 12  | 3   | -- | --   |
| CakTC40529 | Ca(ICC2/PI489777)SNP_33638 | 705  | A | C | 116 | 83  | -- | --   |
|            | Ca(ICC2/PI489777)SNP_33639 | 755  | A | G | 103 | 79  | -- | --   |
|            | Ca(ICC2/PI489777)SNP_33640 | 1442 | A | C | 85  | 104 | -- | --   |
| CakTC32016 | Ca(ICC2/PI489777)SNP_33641 | 1286 | A | G | 4   | 4   | -- | --   |
| CakTC26051 | Ca(ICC2/PI489777)SNP_33642 | 526  | A | G | 45  | 13  | -- | --   |
|            | Ca(ICC2/PI489777)SNP_33643 | 679  | T | A | 49  | 12  | -- | --   |
|            | Ca(ICC2/PI489777)SNP_33644 | 952  | G | C | 45  | 8   | -- | --   |
| CakTC43003 | Ca(ICC2/PI489777)SNP_33645 | 441  | G | A | 13  | 12  | -- | --   |
|            | Ca(ICC2/PI489777)SNP_33646 | 714  | C | A | 3   | 3   | -- | --   |
| CakTC37573 | Ca(ICC2/PI489777)SNP_33647 | 674  | T | C | 51  | 19  | -- | --   |
|            | Ca(ICC2/PI489777)SNP_33648 | 1016 | G | A | 47  | 40  | -- | --   |
| CakTC28211 | Ca(ICC2/PI489777)SNP_33649 | 2390 | C | A | 44  | 11  | -- | --   |
|            | Ca(ICC2/PI489777)SNP_33650 | 2698 | G | C | 32  | 5   | -- | --   |
| CakTC35453 | Ca(ICC2/PI489777)SNP_33651 | 425  | C | T | 12  | 4   | -- | --   |
|            | Ca(ICC2/PI489777)SNP_33652 | 452  | C | T | 11  | 4   | -- | --   |
|            | Ca(ICC2/PI489777)SNP_33653 | 2737 | G | A | 5   | 3   | -- | --   |
| CakTC31080 | Ca(ICC2/PI489777)SNP_33654 | 793  | G | A | 3   | 11  | -- | --   |
| CakTC25058 | Ca(ICC2/PI489777)SNP_33655 | 569  | G | A | 5   | 4   | -- | --   |
|            | Ca(ICC2/PI489777)SNP_33656 | 588  | G | A | 5   | 6   | -- | --   |
|            | Ca(ICC2/PI489777)SNP_33657 | 657  | T | C | 3   | 6   | -- | --   |
| CakTC36069 | Ca(ICC2/PI489777)SNP_33658 | 190  | C | T | 11  | 5   | -- | --   |
|            | Ca(ICC2/PI489777)SNP_33659 | 316  | C | G | 13  | 5   | -- | --   |
|            | Ca(ICC2/PI489777)SNP_33660 | 358  | G | A | 14  | 5   | -- | --   |
|            | Ca(ICC2/PI489777)SNP_33661 | 595  | C | T | 20  | 4   | -- | --   |
|            | Ca(ICC2/PI489777)SNP_33662 | 1181 | A | G | 7   | 9   | -- | --   |
|            | Ca(ICC2/PI489777)SNP_33663 | 1309 | A | G | 13  | 7   | -- | --   |
|            | Ca(ICC2/PI489777)SNP_33664 | 1313 | G | A | 15  | 13  | -- | --   |
|            | Ca(ICC2/PI489777)SNP_33665 | 1905 | T | C | 16  | 4   | -- | --   |

|            |                            |      |   |   |    |    |           |    |
|------------|----------------------------|------|---|---|----|----|-----------|----|
|            | Ca(ICC2/PI489777)SNP_33666 | 2074 | C | G | 14 | 3  | --        | -- |
|            | Ca(ICC2/PI489777)SNP_33667 | 2578 | T | C | 8  | 7  | --        | -- |
|            | Ca(ICC2/PI489777)SNP_33668 | 5179 | T | G | 3  | 6  | --        | -- |
| CakTC40447 | Ca(ICC2/PI489777)SNP_33669 | 584  | A | G | 33 | 5  | --        | -- |
|            | Ca(ICC2/PI489777)SNP_33670 | 681  | T | C | 29 | 5  | --        | -- |
|            | Ca(ICC2/PI489777)SNP_33671 | 751  | A | G | 20 | 4  | --        | -- |
| CakTC39846 | Ca(ICC2/PI489777)SNP_33672 | 644  | T | C | 20 | 17 | --        | -- |
|            | Ca(ICC2/PI489777)SNP_33673 | 930  | T | C | 25 | 9  | --        | -- |
|            | Ca(ICC2/PI489777)SNP_33674 | 950  | C | A | 19 | 3  | --        | -- |
| CakTC39904 | Ca(ICC2/PI489777)SNP_33675 | 244  | T | C | 5  | 5  | --        | -- |
|            | Ca(ICC2/PI489777)SNP_33676 | 457  | C | G | 8  | 7  | --        | -- |
|            | Ca(ICC2/PI489777)SNP_33677 | 478  | C | T | 8  | 6  | --        | -- |
| CakTC39878 | Ca(ICC2/PI489777)SNP_33678 | 241  | C | T | 10 | 6  | --        | -- |
|            | Ca(ICC2/PI489777)SNP_33679 | 367  | A | G | 12 | 9  | --        | -- |
|            | Ca(ICC2/PI489777)SNP_33680 | 536  | C | T | 19 | 13 | --        | -- |
|            | Ca(ICC2/PI489777)SNP_33681 | 801  | A | C | 23 | 8  | --        | -- |
|            | Ca(ICC2/PI489777)SNP_33682 | 1040 | T | C | 28 | 5  | --        | -- |
| CakTC43231 | Ca(ICC2/PI489777)SNP_33683 | 1282 | T | A | 31 | 22 | --        | -- |
| CakTC30395 | Ca(ICC2/PI489777)SNP_33684 | 536  | T | G | 3  | 3  | --        | -- |
| CakTC24270 | Ca(ICC2/PI489777)SNP_33685 | 296  | C | T | 24 | 5  | --        | -- |
|            | Ca(ICC2/PI489777)SNP_33686 | 559  | A | G | 17 | 7  | --        | -- |
|            | Ca(ICC2/PI489777)SNP_33687 | 786  | A | G | 21 | 8  | --        | -- |
|            | Ca(ICC2/PI489777)SNP_33688 | 1032 | T | C | 48 | 6  | --        | -- |
|            | Ca(ICC2/PI489777)SNP_33689 | 1660 | T | C | 25 | 8  | --        | -- |
|            | Ca(ICC2/PI489777)SNP_33690 | 1958 | G | T | 32 | 8  | --        | -- |
|            | Ca(ICC2/PI489777)SNP_33691 | 1969 | C | T | 32 | 7  | --        | -- |
| CakTC42790 | Ca(ICC2/PI489777)SNP_33692 | 1161 | G | C | 3  | 4  | Young_pod | -- |
| CakTC22721 | Ca(ICC2/PI489777)SNP_33693 | 280  | G | A | 8  | 3  | --        | -- |
|            | Ca(ICC2/PI489777)SNP_33694 | 292  | T | C | 7  | 3  | --        | -- |
|            | Ca(ICC2/PI489777)SNP_33695 | 547  | C | T | 11 | 9  | --        | -- |
|            | Ca(ICC2/PI489777)SNP_33696 | 806  | T | C | 6  | 6  | --        | -- |
|            | Ca(ICC2/PI489777)SNP_33697 | 916  | T | A | 4  | 5  | --        | -- |
|            | Ca(ICC2/PI489777)SNP_33698 | 922  | T | C | 5  | 5  | --        | -- |
|            | Ca(ICC2/PI489777)SNP_33699 | 1213 | T | C | 12 | 5  | --        | -- |
|            | Ca(ICC2/PI489777)SNP_33700 | 1275 | A | G | 11 | 15 | --        | -- |
| CakTC09614 | Ca(ICC2/PI489777)SNP_33701 | 591  | T | C | 6  | 3  | --        | -- |
|            | Ca(ICC2/PI489777)SNP_33702 | 642  | C | T | 6  | 3  | --        | -- |
|            | Ca(ICC2/PI489777)SNP_33703 | 1513 | C | T | 5  | 5  | --        | -- |
|            | Ca(ICC2/PI489777)SNP_33704 | 1985 | G | A | 8  | 4  | --        | -- |
|            | Ca(ICC2/PI489777)SNP_33705 | 2113 | T | C | 10 | 3  | --        | -- |
| CakTC25724 | Ca(ICC2/PI489777)SNP_33706 | 1378 | G | T | 14 | 8  | --        | -- |
|            | Ca(ICC2/PI489777)SNP_33707 | 1542 | T | C | 24 | 15 | --        | -- |
|            | Ca(ICC2/PI489777)SNP_33708 | 1583 | A | C | 26 | 17 | --        | -- |
|            | Ca(ICC2/PI489777)SNP_33709 | 2657 | G | A | 34 | 16 | --        | -- |
| CakTC36328 | Ca(ICC2/PI489777)SNP_33710 | 826  | G | A | 15 | 10 | --        | -- |
|            | Ca(ICC2/PI489777)SNP_33711 | 865  | C | T | 15 | 9  | --        | -- |
|            | Ca(ICC2/PI489777)SNP_33712 | 1126 | C | T | 15 | 10 | --        | -- |
|            | Ca(ICC2/PI489777)SNP_33713 | 1133 | C | A | 16 | 10 | --        | -- |
|            | Ca(ICC2/PI489777)SNP_33714 | 1615 | A | G | 17 | 12 | --        | -- |
|            | Ca(ICC2/PI489777)SNP_33715 | 1873 | A | T | 20 | 11 | --        | -- |
|            | Ca(ICC2/PI489777)SNP_33716 | 2611 | G | C | 21 | 17 | --        | -- |
|            | Ca(ICC2/PI489777)SNP_33717 | 2626 | A | G | 19 | 15 | --        | -- |
|            | Ca(ICC2/PI489777)SNP_33718 | 2745 | A | T | 13 | 11 | --        | -- |
| CakTC38150 | Ca(ICC2/PI489777)SNP_33719 | 572  | A | G | 27 | 14 | --        | -- |
|            | Ca(ICC2/PI489777)SNP_33720 | 710  | A | C | 25 | 10 | --        | -- |
|            | Ca(ICC2/PI489777)SNP_33721 | 746  | A | G | 21 | 10 | --        | -- |
|            | Ca(ICC2/PI489777)SNP_33722 | 819  | G | A | 17 | 9  | --        | -- |
|            | Ca(ICC2/PI489777)SNP_33723 | 856  | G | A | 18 | 8  | --        | -- |
| CakTC29942 | Ca(ICC2/PI489777)SNP_33724 | 299  | A | T | 14 | 12 | --        | -- |
|            | Ca(ICC2/PI489777)SNP_33725 | 572  | G | A | 26 | 10 | --        | -- |
|            | Ca(ICC2/PI489777)SNP_33726 | 2336 | A | T | 16 | 6  | --        | -- |
|            | Ca(ICC2/PI489777)SNP_33727 | 2429 | T | A | 10 | 8  | --        | -- |
| CakTC38520 | Ca(ICC2/PI489777)SNP_33728 | 522  | A | G | 23 | 20 | --        | -- |
|            | Ca(ICC2/PI489777)SNP_33729 | 1236 | T | C | 26 | 12 | --        | -- |
|            | Ca(ICC2/PI489777)SNP_33730 | 1449 | G | A | 18 | 3  | --        | -- |
| CakTC23713 | Ca(ICC2/PI489777)SNP_33731 | 1716 | C | T | 4  | 3  | --        | -- |
|            | Ca(ICC2/PI489777)SNP_33732 | 1968 | T | G | 7  | 5  | --        | -- |
|            | Ca(ICC2/PI489777)SNP_33733 | 2584 | A | G | 7  | 4  | --        | -- |
| CakTC29232 | Ca(ICC2/PI489777)SNP_33734 | 710  | G | A | 5  | 3  | --        | -- |
|            | Ca(ICC2/PI489777)SNP_33735 | 5139 | T | C | 4  | 5  | --        | -- |
| CakTC24684 | Ca(ICC2/PI489777)SNP_33736 | 121  | G | T | 34 | 11 | --        | -- |
|            | Ca(ICC2/PI489777)SNP_33737 | 298  | C | T | 64 | 35 | --        | -- |
| CakTC11714 | Ca(ICC2/PI489777)SNP_33738 | 126  | C | T | 11 | 10 | --        | -- |
| CakTC00377 | Ca(ICC2/PI489777)SNP_33739 | 922  | G | C | 4  | 3  | --        | -- |



|            |                            |      |   |   |    |    |    |      |
|------------|----------------------------|------|---|---|----|----|----|------|
| CakTC09025 | Ca(ICC2/PI489777)SNP_33740 | 3218 | G | A | 5  | 3  | -- | --   |
|            | Ca(ICC2/PI489777)SNP_33741 | 5113 | C | T | 3  | 5  | -- | --   |
| CakTC24723 | Ca(ICC2/PI489777)SNP_33742 | 678  | T | A | 4  | 3  | -- | --   |
|            | Ca(ICC2/PI489777)SNP_33743 | 697  | T | G | 4  | 3  | -- | --   |
| CakTC31048 | Ca(ICC2/PI489777)SNP_33744 | 209  | A | G | 26 | 12 | -- | --   |
|            | Ca(ICC2/PI489777)SNP_33745 | 817  | T | C | 29 | 10 | -- | --   |
|            | Ca(ICC2/PI489777)SNP_33746 | 1672 | A | G | 17 | 14 | -- | --   |
| CakTC27138 | Ca(ICC2/PI489777)SNP_33747 | 287  | T | C | 15 | 15 | -- | --   |
|            | Ca(ICC2/PI489777)SNP_33748 | 710  | A | G | 13 | 7  | -- | --   |
|            | Ca(ICC2/PI489777)SNP_33749 | 809  | T | C | 13 | 6  | -- | --   |
|            | Ca(ICC2/PI489777)SNP_33750 | 1672 | G | A | 20 | 3  | -- | --   |
|            | Ca(ICC2/PI489777)SNP_33751 | 2072 | C | T | 10 | 7  | -- | --   |
| CakTC27957 | Ca(ICC2/PI489777)SNP_33752 | 750  | T | G | 16 | 9  | -- | --   |
| CakTC42009 | Ca(ICC2/PI489777)SNP_33753 | 160  | G | A | 19 | 4  | -- | --   |
| CakTC37840 | Ca(ICC2/PI489777)SNP_33754 | 221  | T | G | 9  | 17 | -- | --   |
|            | Ca(ICC2/PI489777)SNP_33755 | 303  | A | G | 11 | 18 | -- | --   |
|            | Ca(ICC2/PI489777)SNP_33756 | 375  | T | A | 12 | 17 | -- | --   |
|            | Ca(ICC2/PI489777)SNP_33757 | 387  | G | A | 13 | 18 | -- | --   |
|            | Ca(ICC2/PI489777)SNP_33758 | 825  | A | G | 23 | 13 | -- | --   |
|            | Ca(ICC2/PI489777)SNP_33759 | 920  | T | G | 31 | 18 | -- | --   |
|            | Ca(ICC2/PI489777)SNP_33760 | 921  | C | A | 31 | 17 | -- | --   |
|            | Ca(ICC2/PI489777)SNP_33761 | 967  | C | T | 32 | 18 | -- | --   |
|            | Ca(ICC2/PI489777)SNP_33762 | 1015 | A | G | 31 | 18 | -- | --   |
| CakTC36683 | Ca(ICC2/PI489777)SNP_33763 | 91   | G | A | 9  | 5  | -- | --   |
|            | Ca(ICC2/PI489777)SNP_33764 | 211  | T | C | 8  | 6  | -- | --   |
|            | Ca(ICC2/PI489777)SNP_33765 | 424  | C | A | 8  | 10 | -- | --   |
| CakTC38479 | Ca(ICC2/PI489777)SNP_33766 | 687  | C | A | 14 | 32 | -- | --   |
|            | Ca(ICC2/PI489777)SNP_33767 | 825  | T | C | 12 | 21 | -- | --   |
|            | Ca(ICC2/PI489777)SNP_33768 | 865  | A | G | 12 | 20 | -- | --   |
|            | Ca(ICC2/PI489777)SNP_33769 | 900  | G | A | 11 | 20 | -- | --   |
|            | Ca(ICC2/PI489777)SNP_33770 | 1013 | T | C | 10 | 4  | -- | --   |
|            | Ca(ICC2/PI489777)SNP_33771 | 1062 | T | C | 8  | 3  | -- | --   |
| CakTC32698 | Ca(ICC2/PI489777)SNP_33772 | 275  | C | T | 13 | 8  | -- | --   |
|            | Ca(ICC2/PI489777)SNP_33773 | 1459 | C | T | 17 | 15 | -- | --   |
|            | Ca(ICC2/PI489777)SNP_33774 | 1542 | C | T | 19 | 12 | -- | --   |
|            | Ca(ICC2/PI489777)SNP_33775 | 2083 | C | T | 10 | 11 | -- | --   |
| CakTC41228 | Ca(ICC2/PI489777)SNP_33776 | 813  | A | T | 7  | 7  | -- | --   |
|            | Ca(ICC2/PI489777)SNP_33777 | 814  | A | G | 7  | 7  | -- | --   |
|            | Ca(ICC2/PI489777)SNP_33778 | 1868 | C | G | 16 | 12 | -- | --   |
| CakTC41255 | Ca(ICC2/PI489777)SNP_33779 | 1580 | A | G | 14 | 6  | -- | --   |
|            | Ca(ICC2/PI489777)SNP_33780 | 1949 | A | T | 12 | 6  | -- | --   |
| CakTC21892 | Ca(ICC2/PI489777)SNP_33781 | 237  | T | C | 3  | 3  | -- | WRKY |
| CakTC35437 | Ca(ICC2/PI489777)SNP_33782 | 435  | T | C | 8  | 5  | -- | --   |
|            | Ca(ICC2/PI489777)SNP_33783 | 714  | T | C | 5  | 5  | -- | --   |
|            | Ca(ICC2/PI489777)SNP_33784 | 1558 | A | G | 11 | 3  | -- | --   |
|            | Ca(ICC2/PI489777)SNP_33785 | 1599 | T | C | 12 | 3  | -- | --   |
|            | Ca(ICC2/PI489777)SNP_33786 | 1631 | C | T | 10 | 3  | -- | --   |
|            | Ca(ICC2/PI489777)SNP_33787 | 2578 | A | T | 6  | 6  | -- | --   |
|            | Ca(ICC2/PI489777)SNP_33788 | 2767 | T | C | 6  | 15 | -- | --   |
|            | Ca(ICC2/PI489777)SNP_33789 | 2801 | T | C | 7  | 14 | -- | --   |
|            | Ca(ICC2/PI489777)SNP_33790 | 2831 | G | C | 6  | 14 | -- | --   |
|            | Ca(ICC2/PI489777)SNP_33791 | 3123 | G | A | 6  | 8  | -- | --   |
|            | Ca(ICC2/PI489777)SNP_33792 | 3536 | T | G | 3  | 5  | -- | --   |
|            | Ca(ICC2/PI489777)SNP_33793 | 4059 | G | A | 6  | 6  | -- | --   |
|            | Ca(ICC2/PI489777)SNP_33794 | 4124 | C | G | 6  | 8  | -- | --   |
| CakTC39021 | Ca(ICC2/PI489777)SNP_33795 | 108  | G | C | 7  | 3  | -- | --   |
|            | Ca(ICC2/PI489777)SNP_33796 | 582  | T | C | 12 | 9  | -- | --   |
|            | Ca(ICC2/PI489777)SNP_33797 | 873  | C | T | 16 | 9  | -- | --   |
|            | Ca(ICC2/PI489777)SNP_33798 | 1119 | G | A | 12 | 5  | -- | --   |
|            | Ca(ICC2/PI489777)SNP_33799 | 1308 | T | A | 13 | 3  | -- | --   |
|            | Ca(ICC2/PI489777)SNP_33800 | 1326 | G | C | 12 | 3  | -- | --   |
|            | Ca(ICC2/PI489777)SNP_33801 | 1398 | C | G | 7  | 3  | -- | --   |
| CakTC27508 | Ca(ICC2/PI489777)SNP_33802 | 211  | G | A | 10 | 9  | -- | --   |
|            | Ca(ICC2/PI489777)SNP_33803 | 311  | G | A | 15 | 13 | -- | --   |
|            | Ca(ICC2/PI489777)SNP_33804 | 633  | T | C | 7  | 8  | -- | --   |
| CakTC26357 | Ca(ICC2/PI489777)SNP_33805 | 944  | A | T | 91 | 69 | -- | --   |
| CakTC08061 | Ca(ICC2/PI489777)SNP_33806 | 821  | G | A | 15 | 6  | -- | --   |
|            | Ca(ICC2/PI489777)SNP_33807 | 848  | A | G | 14 | 6  | -- | --   |
|            | Ca(ICC2/PI489777)SNP_33808 | 1412 | A | G | 4  | 7  | -- | --   |
|            | Ca(ICC2/PI489777)SNP_33809 | 1457 | C | T | 5  | 5  | -- | --   |
|            | Ca(ICC2/PI489777)SNP_33810 | 1530 | C | A | 4  | 5  | -- | --   |
|            | Ca(ICC2/PI489777)SNP_33811 | 1745 | T | C | 5  | 5  | -- | --   |
|            | Ca(ICC2/PI489777)SNP_33812 | 3111 | A | G | 3  | 3  | -- | --   |
| CakTC41551 | Ca(ICC2/PI489777)SNP_33813 | 545  | C | A | 16 | 4  | -- | --   |

|            |                             |       |   |   |     |    |           |    |
|------------|-----------------------------|-------|---|---|-----|----|-----------|----|
| CakTC36610 | Ca(ICCV2/PI489777)SNP_33814 | 462   | C | T | 4   | 6  | --        | -- |
|            | Ca(ICCV2/PI489777)SNP_33815 | 588   | G | A | 9   | 5  | --        | -- |
|            | Ca(ICCV2/PI489777)SNP_33816 | 627   | A | G | 7   | 5  | --        | -- |
|            | Ca(ICCV2/PI489777)SNP_33817 | 759   | A | G | 6   | 6  | --        | -- |
|            | Ca(ICCV2/PI489777)SNP_33818 | 1829  | C | T | 4   | 4  | --        | -- |
|            | Ca(ICCV2/PI489777)SNP_33819 | 1932  | T | A | 6   | 6  | --        | -- |
|            | Ca(ICCV2/PI489777)SNP_33820 | 2099  | A | G | 14  | 8  | --        | -- |
| CakTC33859 | Ca(ICCV2/PI489777)SNP_33821 | 128   | C | A | 5   | 4  | --        | -- |
|            | Ca(ICCV2/PI489777)SNP_33822 | 991   | A | C | 27  | 25 | --        | -- |
|            | Ca(ICCV2/PI489777)SNP_33823 | 2023  | C | T | 25  | 7  | --        | -- |
|            | Ca(ICCV2/PI489777)SNP_33824 | 6921  | T | C | 18  | 17 | --        | -- |
|            | Ca(ICCV2/PI489777)SNP_33825 | 13321 | G | T | 9   | 9  | --        | -- |
|            | Ca(ICCV2/PI489777)SNP_33826 | 13619 | C | T | 5   | 8  | --        | -- |
| CakTC21229 | Ca(ICCV2/PI489777)SNP_33827 | 288   | C | A | 8   | 3  | --        | -- |
| CakTC34842 | Ca(ICCV2/PI489777)SNP_33828 | 395   | A | G | 3   | 4  | --        | -- |
| CakTC34711 | Ca(ICCV2/PI489777)SNP_33829 | 781   | G | A | 16  | 16 | --        | -- |
|            | Ca(ICCV2/PI489777)SNP_33830 | 1152  | G | A | 13  | 8  | --        | -- |
|            | Ca(ICCV2/PI489777)SNP_33831 | 1334  | G | A | 11  | 10 | --        | -- |
|            | Ca(ICCV2/PI489777)SNP_33832 | 1479  | G | A | 13  | 9  | --        | -- |
|            | Ca(ICCV2/PI489777)SNP_33833 | 1716  | A | G | 6   | 10 | --        | -- |
|            | Ca(ICCV2/PI489777)SNP_33834 | 2526  | C | T | 15  | 10 | --        | -- |
| CakTC33097 | Ca(ICCV2/PI489777)SNP_33835 | 547   | A | C | 3   | 8  | --        | -- |
|            | Ca(ICCV2/PI489777)SNP_33836 | 603   | C | T | 5   | 8  | --        | -- |
|            | Ca(ICCV2/PI489777)SNP_33837 | 1540  | A | G | 5   | 6  | --        | -- |
|            | Ca(ICCV2/PI489777)SNP_33838 | 1662  | C | T | 6   | 4  | --        | -- |
| CakTC29194 | Ca(ICCV2/PI489777)SNP_33839 | 692   | C | T | 10  | 3  | --        | -- |
|            | Ca(ICCV2/PI489777)SNP_33840 | 723   | G | T | 9   | 3  | --        | -- |
|            | Ca(ICCV2/PI489777)SNP_33841 | 916   | T | C | 7   | 3  | --        | -- |
|            | Ca(ICCV2/PI489777)SNP_33842 | 953   | G | A | 8   | 3  | --        | -- |
|            | Ca(ICCV2/PI489777)SNP_33843 | 1136  | C | T | 5   | 4  | --        | -- |
|            | Ca(ICCV2/PI489777)SNP_33844 | 1148  | A | G | 5   | 4  | --        | -- |
|            | Ca(ICCV2/PI489777)SNP_33845 | 1178  | T | A | 3   | 5  | --        | -- |
|            | Ca(ICCV2/PI489777)SNP_33846 | 1429  | C | T | 7   | 4  | --        | -- |
|            | Ca(ICCV2/PI489777)SNP_33847 | 1439  | G | A | 6   | 4  | --        | -- |
|            | Ca(ICCV2/PI489777)SNP_33848 | 1690  | T | C | 7   | 6  | --        | -- |
| CakTC39445 | Ca(ICCV2/PI489777)SNP_33849 | 16    | A | G | 3   | 5  | --        | -- |
|            | Ca(ICCV2/PI489777)SNP_33850 | 58    | C | G | 7   | 13 | --        | -- |
|            | Ca(ICCV2/PI489777)SNP_33851 | 1427  | A | G | 6   | 6  | --        | -- |
| CakTC30473 | Ca(ICCV2/PI489777)SNP_33852 | 485   | A | G | 6   | 4  | --        | -- |
|            | Ca(ICCV2/PI489777)SNP_33853 | 716   | C | T | 6   | 5  | --        | -- |
|            | Ca(ICCV2/PI489777)SNP_33854 | 718   | C | A | 6   | 6  | --        | -- |
|            | Ca(ICCV2/PI489777)SNP_33855 | 769   | T | C | 7   | 7  | --        | -- |
|            | Ca(ICCV2/PI489777)SNP_33856 | 1243  | G | C | 5   | 5  | --        | -- |
|            | Ca(ICCV2/PI489777)SNP_33857 | 1345  | G | A | 6   | 4  | --        | -- |
|            | Ca(ICCV2/PI489777)SNP_33858 | 1444  | A | G | 8   | 9  | --        | -- |
|            | Ca(ICCV2/PI489777)SNP_33859 | 1566  | C | T | 7   | 6  | --        | -- |
|            | Ca(ICCV2/PI489777)SNP_33860 | 1816  | C | T | 7   | 4  | --        | -- |
|            | Ca(ICCV2/PI489777)SNP_33861 | 1822  | C | T | 7   | 4  | --        | -- |
|            | Ca(ICCV2/PI489777)SNP_33862 | 2803  | G | C | 5   | 9  | --        | -- |
| CakTC20156 | Ca(ICCV2/PI489777)SNP_33863 | 733   | G | A | 145 | 59 | --        | -- |
|            | Ca(ICCV2/PI489777)SNP_33864 | 775   | A | T | 142 | 61 | --        | -- |
|            | Ca(ICCV2/PI489777)SNP_33865 | 817   | A | G | 143 | 69 | --        | -- |
|            | Ca(ICCV2/PI489777)SNP_33866 | 1834  | T | A | 100 | 21 | --        | -- |
| CakTC29976 | Ca(ICCV2/PI489777)SNP_33867 | 802   | C | T | 4   | 3  | Young_pod | -- |
|            | Ca(ICCV2/PI489777)SNP_33868 | 1942  | T | C | 12  | 5  | Young_pod | -- |
|            | Ca(ICCV2/PI489777)SNP_33869 | 1945  | T | C | 9   | 5  | Young_pod | -- |
|            | Ca(ICCV2/PI489777)SNP_33870 | 2019  | C | A | 13  | 5  | Young_pod | -- |
|            | Ca(ICCV2/PI489777)SNP_33871 | 2507  | T | C | 7   | 5  | Young_pod | -- |
|            | Ca(ICCV2/PI489777)SNP_33872 | 2583  | C | T | 5   | 5  | Young_pod | -- |
|            | Ca(ICCV2/PI489777)SNP_33873 | 2833  | T | C | 3   | 5  | Young_pod | -- |
|            | Ca(ICCV2/PI489777)SNP_33874 | 2920  | T | G | 3   | 7  | Young_pod | -- |
| CakTC26645 | Ca(ICCV2/PI489777)SNP_33875 | 138   | G | A | 4   | 3  | --        | -- |
|            | Ca(ICCV2/PI489777)SNP_33876 | 351   | C | T | 13  | 18 | --        | -- |
|            | Ca(ICCV2/PI489777)SNP_33877 | 462   | C | A | 19  | 20 | --        | -- |
|            | Ca(ICCV2/PI489777)SNP_33878 | 657   | G | T | 13  | 10 | --        | -- |
|            | Ca(ICCV2/PI489777)SNP_33879 | 658   | C | G | 13  | 9  | --        | -- |
|            | Ca(ICCV2/PI489777)SNP_33880 | 840   | T | A | 6   | 4  | --        | -- |
| CakTC24960 | Ca(ICCV2/PI489777)SNP_33881 | 716   | T | C | 30  | 23 | --        | -- |
|            | Ca(ICCV2/PI489777)SNP_33882 | 825   | A | T | 22  | 22 | --        | -- |
|            | Ca(ICCV2/PI489777)SNP_33883 | 826   | A | T | 22  | 25 | --        | -- |
| CakTC41718 | Ca(ICCV2/PI489777)SNP_33884 | 186   | A | G | 6   | 13 | --        | -- |
|            | Ca(ICCV2/PI489777)SNP_33885 | 927   | T | A | 27  | 27 | --        | -- |
|            | Ca(ICCV2/PI489777)SNP_33886 | 1161  | A | G | 35  | 40 | --        | -- |
| CakTC23983 | Ca(ICCV2/PI489777)SNP_33887 | 517   | C | T | 16  | 11 | --        | -- |

|            |                            |      |   |   |    |    |    |    |
|------------|----------------------------|------|---|---|----|----|----|----|
|            | Ca(ICC2/PI489777)SNP_33888 | 655  | G | A | 10 | 8  | -- | -- |
| CakTC10765 | Ca(ICC2/PI489777)SNP_33889 | 100  | T | C | 5  | 4  | -- | -- |
|            | Ca(ICC2/PI489777)SNP_33890 | 777  | C | T | 31 | 12 | -- | -- |
|            | Ca(ICC2/PI489777)SNP_33891 | 1227 | G | A | 23 | 11 | -- | -- |
| CakTC40551 | Ca(ICC2/PI489777)SNP_33892 | 710  | T | C | 6  | 3  | -- | -- |
| CakTC34076 | Ca(ICC2/PI489777)SNP_33893 | 473  | G | A | 18 | 9  | -- | -- |
|            | Ca(ICC2/PI489777)SNP_33894 | 514  | A | T | 11 | 4  | -- | -- |
| CakTC37881 | Ca(ICC2/PI489777)SNP_33895 | 407  | T | C | 27 | 18 | -- | -- |
| CakTC40020 | Ca(ICC2/PI489777)SNP_33896 | 978  | G | A | 14 | 4  | -- | -- |
|            | Ca(ICC2/PI489777)SNP_33897 | 1253 | G | C | 16 | 3  | -- | -- |
| CakTC33014 | Ca(ICC2/PI489777)SNP_33898 | 518  | T | C | 4  | 3  | -- | -- |
| CakTC32484 | Ca(ICC2/PI489777)SNP_33899 | 87   | G | A | 3  | 4  | -- | -- |
|            | Ca(ICC2/PI489777)SNP_33900 | 150  | C | T | 10 | 4  | -- | -- |
|            | Ca(ICC2/PI489777)SNP_33901 | 227  | T | C | 17 | 5  | -- | -- |
|            | Ca(ICC2/PI489777)SNP_33902 | 397  | G | A | 14 | 5  | -- | -- |
| CakTC38263 | Ca(ICC2/PI489777)SNP_33903 | 158  | T | A | 73 | 17 | -- | -- |
|            | Ca(ICC2/PI489777)SNP_33904 | 422  | C | T | 74 | 29 | -- | -- |
|            | Ca(ICC2/PI489777)SNP_33905 | 585  | T | G | 63 | 26 | -- | -- |
|            | Ca(ICC2/PI489777)SNP_33906 | 599  | G | A | 44 | 26 | -- | -- |
|            | Ca(ICC2/PI489777)SNP_33907 | 1459 | A | T | 22 | 6  | -- | -- |
| CakTC25363 | Ca(ICC2/PI489777)SNP_33908 | 760  | C | T | 31 | 14 | -- | -- |
| CakTC27243 | Ca(ICC2/PI489777)SNP_33909 | 174  | C | T | 15 | 3  | -- | -- |
|            | Ca(ICC2/PI489777)SNP_33910 | 266  | G | C | 30 | 3  | -- | -- |
|            | Ca(ICC2/PI489777)SNP_33911 | 281  | G | A | 31 | 4  | -- | -- |
|            | Ca(ICC2/PI489777)SNP_33912 | 452  | G | T | 37 | 4  | -- | -- |
|            | Ca(ICC2/PI489777)SNP_33913 | 530  | G | C | 37 | 3  | -- | -- |
|            | Ca(ICC2/PI489777)SNP_33914 | 1001 | T | C | 27 | 7  | -- | -- |
|            | Ca(ICC2/PI489777)SNP_33915 | 1124 | T | C | 22 | 8  | -- | -- |
|            | Ca(ICC2/PI489777)SNP_33916 | 1155 | A | G | 27 | 7  | -- | -- |
|            | Ca(ICC2/PI489777)SNP_33917 | 1160 | G | A | 25 | 6  | -- | -- |
|            | Ca(ICC2/PI489777)SNP_33918 | 1176 | A | T | 23 | 7  | -- | -- |
|            | Ca(ICC2/PI489777)SNP_33919 | 1298 | G | A | 15 | 5  | -- | -- |
|            | Ca(ICC2/PI489777)SNP_33920 | 1401 | G | A | 10 | 4  | -- | -- |
| CakTC27317 | Ca(ICC2/PI489777)SNP_33921 | 2662 | A | G | 5  | 4  | -- | -- |
| CakTC28440 | Ca(ICC2/PI489777)SNP_33922 | 489  | C | A | 11 | 6  | -- | -- |
| CakTC08450 | Ca(ICC2/PI489777)SNP_33923 | 414  | T | C | 4  | 3  | -- | -- |
| CakTC41580 | Ca(ICC2/PI489777)SNP_33924 | 168  | A | T | 3  | 5  | -- | -- |
|            | Ca(ICC2/PI489777)SNP_33925 | 296  | T | C | 7  | 13 | -- | -- |
|            | Ca(ICC2/PI489777)SNP_33926 | 372  | G | A | 7  | 16 | -- | -- |
|            | Ca(ICC2/PI489777)SNP_33927 | 419  | A | T | 7  | 17 | -- | -- |
|            | Ca(ICC2/PI489777)SNP_33928 | 498  | C | T | 13 | 16 | -- | -- |
|            | Ca(ICC2/PI489777)SNP_33929 | 503  | T | C | 13 | 17 | -- | -- |
|            | Ca(ICC2/PI489777)SNP_33930 | 1020 | C | T | 12 | 25 | -- | -- |
|            | Ca(ICC2/PI489777)SNP_33931 | 1095 | C | T | 14 | 23 | -- | -- |
|            | Ca(ICC2/PI489777)SNP_33932 | 1336 | C | T | 27 | 10 | -- | -- |
|            | Ca(ICC2/PI489777)SNP_33933 | 1974 | T | G | 4  | 8  | -- | -- |
|            | Ca(ICC2/PI489777)SNP_33934 | 1977 | A | T | 5  | 8  | -- | -- |
|            | Ca(ICC2/PI489777)SNP_33935 | 2058 | A | T | 6  | 9  | -- | -- |
|            | Ca(ICC2/PI489777)SNP_33936 | 2063 | T | C | 6  | 9  | -- | -- |
| CakTC32749 | Ca(ICC2/PI489777)SNP_33937 | 179  | G | C | 5  | 11 | -- | -- |
|            | Ca(ICC2/PI489777)SNP_33938 | 234  | A | G | 3  | 10 | -- | -- |
|            | Ca(ICC2/PI489777)SNP_33939 | 669  | A | G | 5  | 14 | -- | -- |
|            | Ca(ICC2/PI489777)SNP_33940 | 1110 | C | T | 7  | 14 | -- | -- |
|            | Ca(ICC2/PI489777)SNP_33941 | 1215 | T | C | 7  | 7  | -- | -- |
|            | Ca(ICC2/PI489777)SNP_33942 | 1403 | C | A | 11 | 14 | -- | -- |
| CakTC24364 | Ca(ICC2/PI489777)SNP_33943 | 154  | A | G | 9  | 3  | -- | -- |
|            | Ca(ICC2/PI489777)SNP_33944 | 185  | C | A | 7  | 3  | -- | -- |
|            | Ca(ICC2/PI489777)SNP_33945 | 358  | G | T | 9  | 7  | -- | -- |
|            | Ca(ICC2/PI489777)SNP_33946 | 659  | C | T | 15 | 10 | -- | -- |
|            | Ca(ICC2/PI489777)SNP_33947 | 1397 | T | G | 6  | 7  | -- | -- |
|            | Ca(ICC2/PI489777)SNP_33948 | 1418 | G | T | 6  | 6  | -- | -- |
|            | Ca(ICC2/PI489777)SNP_33949 | 1523 | G | A | 8  | 8  | -- | -- |
|            | Ca(ICC2/PI489777)SNP_33950 | 1539 | A | T | 7  | 8  | -- | -- |
|            | Ca(ICC2/PI489777)SNP_33951 | 1543 | G | A | 7  | 8  | -- | -- |
|            | Ca(ICC2/PI489777)SNP_33952 | 1607 | T | G | 8  | 9  | -- | -- |
|            | Ca(ICC2/PI489777)SNP_33953 | 1660 | G | C | 7  | 9  | -- | -- |
|            | Ca(ICC2/PI489777)SNP_33954 | 1710 | C | T | 8  | 6  | -- | -- |
| CakTC27950 | Ca(ICC2/PI489777)SNP_33955 | 246  | T | G | 9  | 5  | -- | -- |
|            | Ca(ICC2/PI489777)SNP_33956 | 273  | A | T | 9  | 5  | -- | -- |
|            | Ca(ICC2/PI489777)SNP_33957 | 404  | C | T | 9  | 4  | -- | -- |
|            | Ca(ICC2/PI489777)SNP_33958 | 424  | A | G | 8  | 4  | -- | -- |
|            | Ca(ICC2/PI489777)SNP_33959 | 449  | T | C | 8  | 4  | -- | -- |
|            | Ca(ICC2/PI489777)SNP_33960 | 544  | T | C | 7  | 7  | -- | -- |
|            | Ca(ICC2/PI489777)SNP_33961 | 571  | T | A | 7  | 6  | -- | -- |

|            |                            |      |   |   |     |     |        |      |
|------------|----------------------------|------|---|---|-----|-----|--------|------|
|            | Ca(ICC2/PI489777)SNP_33962 | 582  | T | G | 8   | 5   | --     | --   |
|            | Ca(ICC2/PI489777)SNP_33963 | 648  | A | G | 8   | 4   | --     | --   |
|            | Ca(ICC2/PI489777)SNP_33964 | 661  | A | G | 6   | 4   | --     | --   |
|            | Ca(ICC2/PI489777)SNP_33965 | 678  | T | A | 8   | 6   | --     | --   |
|            | Ca(ICC2/PI489777)SNP_33966 | 849  | T | C | 7   | 9   | --     | --   |
|            | Ca(ICC2/PI489777)SNP_33967 | 921  | T | C | 4   | 9   | --     | --   |
| CakTC08154 | Ca(ICC2/PI489777)SNP_33968 | 609  | A | T | 4   | 3   | --     | --   |
|            | Ca(ICC2/PI489777)SNP_33969 | 610  | T | C | 4   | 3   | --     | --   |
|            | Ca(ICC2/PI489777)SNP_33970 | 748  | C | G | 3   | 4   | --     | --   |
| CakTC26327 | Ca(ICC2/PI489777)SNP_33971 | 537  | C | G | 231 | 329 | --     | --   |
|            | Ca(ICC2/PI489777)SNP_33972 | 539  | A | T | 225 | 289 | --     | --   |
| CakTC32934 | Ca(ICC2/PI489777)SNP_33973 | 109  | T | C | 10  | 3   | --     | ARID |
|            | Ca(ICC2/PI489777)SNP_33974 | 1197 | A | G | 9   | 3   | --     | ARID |
|            | Ca(ICC2/PI489777)SNP_33975 | 1305 | T | C | 12  | 3   | --     | ARID |
| CakTC38144 | Ca(ICC2/PI489777)SNP_33976 | 905  | C | T | 5   | 4   | --     | TRAF |
| CakTC39492 | Ca(ICC2/PI489777)SNP_33977 | 862  | T | C | 13  | 9   | --     | --   |
|            | Ca(ICC2/PI489777)SNP_33978 | 1148 | G | A | 19  | 10  | --     | --   |
| CakTC29452 | Ca(ICC2/PI489777)SNP_33979 | 192  | T | C | 12  | 4   | --     | --   |
| CakTC24803 | Ca(ICC2/PI489777)SNP_33980 | 1078 | G | A | 15  | 3   | --     | --   |
| CakTC11483 | Ca(ICC2/PI489777)SNP_33981 | 165  | C | T | 6   | 6   | --     | --   |
|            | Ca(ICC2/PI489777)SNP_33982 | 190  | G | T | 8   | 8   | --     | --   |
|            | Ca(ICC2/PI489777)SNP_33983 | 355  | C | G | 9   | 11  | --     | --   |
|            | Ca(ICC2/PI489777)SNP_33984 | 448  | A | G | 13  | 16  | --     | --   |
|            | Ca(ICC2/PI489777)SNP_33985 | 522  | C | A | 15  | 13  | --     | --   |
|            | Ca(ICC2/PI489777)SNP_33986 | 618  | C | T | 20  | 17  | --     | --   |
|            | Ca(ICC2/PI489777)SNP_33987 | 702  | C | T | 20  | 12  | --     | --   |
| CakTC29777 | Ca(ICC2/PI489777)SNP_33988 | 619  | C | T | 20  | 8   | --     | --   |
| CakTC41007 | Ca(ICC2/PI489777)SNP_33989 | 1033 | A | G | 10  | 5   | --     | --   |
|            | Ca(ICC2/PI489777)SNP_33990 | 1354 | T | G | 11  | 6   | --     | --   |
|            | Ca(ICC2/PI489777)SNP_33991 | 1381 | C | G | 9   | 8   | --     | --   |
|            | Ca(ICC2/PI489777)SNP_33992 | 1540 | A | G | 10  | 7   | --     | --   |
|            | Ca(ICC2/PI489777)SNP_33993 | 2714 | G | A | 3   | 5   | --     | --   |
|            | Ca(ICC2/PI489777)SNP_33994 | 2741 | A | G | 3   | 5   | --     | --   |
|            | Ca(ICC2/PI489777)SNP_33995 | 3115 | T | C | 3   | 3   | --     | --   |
|            | Ca(ICC2/PI489777)SNP_33996 | 3126 | G | C | 3   | 3   | --     | --   |
| CakTC42595 | Ca(ICC2/PI489777)SNP_33997 | 935  | G | A | 6   | 3   | --     | --   |
|            | Ca(ICC2/PI489777)SNP_33998 | 936  | A | G | 6   | 3   | --     | --   |
| CakTC30104 | Ca(ICC2/PI489777)SNP_33999 | 369  | G | A | 8   | 6   | --     | --   |
|            | Ca(ICC2/PI489777)SNP_34000 | 996  | T | A | 9   | 7   | --     | --   |
|            | Ca(ICC2/PI489777)SNP_34001 | 1233 | C | T | 5   | 7   | --     | --   |
|            | Ca(ICC2/PI489777)SNP_34002 | 1379 | G | T | 6   | 6   | --     | --   |
|            | Ca(ICC2/PI489777)SNP_34003 | 1380 | A | T | 6   | 6   | --     | --   |
|            | Ca(ICC2/PI489777)SNP_34004 | 1395 | A | G | 7   | 5   | --     | --   |
|            | Ca(ICC2/PI489777)SNP_34005 | 2413 | C | T | 4   | 3   | --     | --   |
| CakTC27940 | Ca(ICC2/PI489777)SNP_34006 | 59   | T | C | 4   | 3   | --     | --   |
|            | Ca(ICC2/PI489777)SNP_34007 | 92   | A | C | 5   | 5   | --     | --   |
| CakTC10839 | Ca(ICC2/PI489777)SNP_34008 | 266  | A | C | 4   | 3   | --     | --   |
| CakTC34698 | Ca(ICC2/PI489777)SNP_34009 | 564  | A | G | 15  | 15  | --     | --   |
|            | Ca(ICC2/PI489777)SNP_34010 | 1842 | A | G | 10  | 14  | --     | --   |
|            | Ca(ICC2/PI489777)SNP_34011 | 2299 | C | G | 12  | 7   | --     | --   |
|            | Ca(ICC2/PI489777)SNP_34012 | 3678 | G | A | 3   | 6   | --     | --   |
| CakTC24282 | Ca(ICC2/PI489777)SNP_34013 | 226  | A | G | 9   | 4   | --     | --   |
|            | Ca(ICC2/PI489777)SNP_34014 | 569  | T | C | 19  | 5   | --     | --   |
| CakTC42874 | Ca(ICC2/PI489777)SNP_34015 | 401  | T | C | 15  | 5   | --     | --   |
|            | Ca(ICC2/PI489777)SNP_34016 | 488  | C | T | 17  | 5   | --     | --   |
| CakTC36479 | Ca(ICC2/PI489777)SNP_34017 | 419  | G | C | 20  | 7   | --     | --   |
|            | Ca(ICC2/PI489777)SNP_34018 | 1009 | C | T | 33  | 11  | --     | --   |
|            | Ca(ICC2/PI489777)SNP_34019 | 1159 | T | C | 23  | 6   | --     | --   |
|            | Ca(ICC2/PI489777)SNP_34020 | 1235 | C | T | 17  | 12  | --     | --   |
|            | Ca(ICC2/PI489777)SNP_34021 | 1262 | G | A | 16  | 11  | --     | --   |
|            | Ca(ICC2/PI489777)SNP_34022 | 1902 | T | G | 6   | 4   | --     | --   |
|            | Ca(ICC2/PI489777)SNP_34023 | 2198 | G | A | 13  | 9   | --     | --   |
|            | Ca(ICC2/PI489777)SNP_34024 | 2301 | T | C | 7   | 8   | --     | --   |
|            | Ca(ICC2/PI489777)SNP_34025 | 2381 | A | G | 7   | 7   | --     | --   |
|            | Ca(ICC2/PI489777)SNP_34026 | 2735 | G | A | 5   | 7   | --     | --   |
| CakTC39746 | Ca(ICC2/PI489777)SNP_34027 | 990  | A | G | 4   | 3   | Flower | bud  |
| CakTC35287 | Ca(ICC2/PI489777)SNP_34028 | 823  | G | A | 5   | 4   | --     | --   |
| CakTC10820 | Ca(ICC2/PI489777)SNP_34029 | 1331 | T | C | 6   | 6   | --     | --   |
| CakTC38830 | Ca(ICC2/PI489777)SNP_34030 | 897  | T | C | 12  | 16  | --     | MYB  |
|            | Ca(ICC2/PI489777)SNP_34031 | 1005 | C | T | 13  | 11  | --     | MYB  |
|            | Ca(ICC2/PI489777)SNP_34032 | 1290 | A | G | 6   | 12  | --     | MYB  |
|            | Ca(ICC2/PI489777)SNP_34033 | 1362 | C | T | 5   | 6   | --     | MYB  |
| CakTC37751 | Ca(ICC2/PI489777)SNP_34034 | 55   | G | A | 20  | 3   | --     | --   |
|            | Ca(ICC2/PI489777)SNP_34035 | 95   | A | G | 27  | 22  | --     | --   |

|            |                            |      |   |   |     |     |        |           |
|------------|----------------------------|------|---|---|-----|-----|--------|-----------|
|            | Ca(ICC2/PI489777)SNP_34036 | 529  | T | G | 47  | 42  | --     | --        |
|            | Ca(ICC2/PI489777)SNP_34037 | 892  | A | G | 50  | 30  | --     | --        |
|            | Ca(ICC2/PI489777)SNP_34038 | 1048 | A | G | 39  | 42  | --     | --        |
|            | Ca(ICC2/PI489777)SNP_34039 | 1216 | T | C | 49  | 56  | --     | --        |
|            | Ca(ICC2/PI489777)SNP_34040 | 1532 | C | G | 33  | 22  | --     | --        |
|            | Ca(ICC2/PI489777)SNP_34041 | 1617 | A | G | 4   | 5   | --     | --        |
| CakTC40165 | Ca(ICC2/PI489777)SNP_34042 | 318  | T | C | 6   | 5   | Flower | bud       |
| CakTC36834 | Ca(ICC2/PI489777)SNP_34043 | 947  | G | A | 16  | 6   | --     | --        |
|            | Ca(ICC2/PI489777)SNP_34044 | 1606 | G | C | 13  | 11  | --     | --        |
| CakTC33575 | Ca(ICC2/PI489777)SNP_34045 | 1178 | A | C | 21  | 10  | --     | --        |
| CakTC24109 | Ca(ICC2/PI489777)SNP_34046 | 396  | C | T | 4   | 4   | --     | --        |
|            | Ca(ICC2/PI489777)SNP_34047 | 575  | C | A | 4   | 4   | --     | --        |
|            | Ca(ICC2/PI489777)SNP_34048 | 1093 | T | C | 4   | 3   | --     | --        |
|            | Ca(ICC2/PI489777)SNP_34049 | 1887 | T | A | 13  | 4   | --     | --        |
|            | Ca(ICC2/PI489777)SNP_34050 | 1989 | T | C | 11  | 5   | --     | --        |
|            | Ca(ICC2/PI489777)SNP_34051 | 2018 | A | G | 6   | 6   | --     | --        |
|            | Ca(ICC2/PI489777)SNP_34052 | 2032 | A | G | 9   | 7   | --     | --        |
|            | Ca(ICC2/PI489777)SNP_34053 | 2084 | G | T | 11  | 7   | --     | --        |
|            | Ca(ICC2/PI489777)SNP_34054 | 2378 | C | T | 9   | 7   | --     | --        |
|            | Ca(ICC2/PI489777)SNP_34055 | 2552 | G | A | 8   | 10  | --     | --        |
|            | Ca(ICC2/PI489777)SNP_34056 | 2638 | G | C | 8   | 3   | --     | --        |
|            | Ca(ICC2/PI489777)SNP_34057 | 2670 | G | A | 8   | 3   | --     | --        |
| CakTC09926 | Ca(ICC2/PI489777)SNP_34058 | 87   | G | A | 3   | 3   | --     | --        |
|            | Ca(ICC2/PI489777)SNP_34059 | 177  | C | T | 7   | 8   | --     | --        |
|            | Ca(ICC2/PI489777)SNP_34060 | 319  | C | T | 7   | 8   | --     | --        |
| CakTC41740 | Ca(ICC2/PI489777)SNP_34061 | 258  | T | C | 4   | 9   | --     | --        |
|            | Ca(ICC2/PI489777)SNP_34062 | 506  | G | A | 6   | 10  | --     | --        |
| CakTC34075 | Ca(ICC2/PI489777)SNP_34063 | 603  | C | A | 21  | 35  | --     | --        |
| CakTC32562 | Ca(ICC2/PI489777)SNP_34064 | 331  | T | C | 6   | 6   | --     | --        |
|            | Ca(ICC2/PI489777)SNP_34065 | 509  | C | A | 3   | 6   | --     | --        |
|            | Ca(ICC2/PI489777)SNP_34066 | 816  | A | G | 4   | 4   | --     | --        |
| CakTC34351 | Ca(ICC2/PI489777)SNP_34067 | 407  | T | C | 5   | 15  | --     | --        |
|            | Ca(ICC2/PI489777)SNP_34068 | 471  | T | C | 4   | 11  | --     | --        |
|            | Ca(ICC2/PI489777)SNP_34069 | 492  | C | T | 5   | 10  | --     | --        |
|            | Ca(ICC2/PI489777)SNP_34070 | 655  | A | G | 5   | 3   | --     | --        |
|            | Ca(ICC2/PI489777)SNP_34071 | 1209 | A | G | 9   | 8   | --     | --        |
|            | Ca(ICC2/PI489777)SNP_34072 | 1482 | A | G | 12  | 13  | --     | --        |
|            | Ca(ICC2/PI489777)SNP_34073 | 1491 | C | T | 11  | 12  | --     | --        |
|            | Ca(ICC2/PI489777)SNP_34074 | 1779 | C | G | 8   | 15  | --     | --        |
| CakTC33209 | Ca(ICC2/PI489777)SNP_34075 | 145  | C | T | 7   | 5   | --     | --        |
|            | Ca(ICC2/PI489777)SNP_34076 | 249  | C | T | 7   | 5   | --     | --        |
|            | Ca(ICC2/PI489777)SNP_34077 | 281  | C | A | 7   | 5   | --     | --        |
| CakTC32074 | Ca(ICC2/PI489777)SNP_34078 | 1823 | G | T | 19  | 10  | --     | --        |
| CakTC37497 | Ca(ICC2/PI489777)SNP_34079 | 125  | A | T | 4   | 3   | --     | --        |
|            | Ca(ICC2/PI489777)SNP_34080 | 349  | A | G | 15  | 7   | --     | --        |
|            | Ca(ICC2/PI489777)SNP_34081 | 358  | C | G | 13  | 7   | --     | --        |
| CakTC36213 | Ca(ICC2/PI489777)SNP_34082 | 332  | C | T | 5   | 3   | --     | --        |
|            | Ca(ICC2/PI489777)SNP_34083 | 2336 | C | T | 17  | 4   | --     | --        |
| CakTC12638 | Ca(ICC2/PI489777)SNP_34084 | 2111 | T | A | 6   | 4   | --     | --        |
|            | Ca(ICC2/PI489777)SNP_34085 | 2546 | C | T | 7   | 3   | --     | --        |
|            | Ca(ICC2/PI489777)SNP_34086 | 2932 | G | A | 7   | 6   | --     | --        |
|            | Ca(ICC2/PI489777)SNP_34087 | 3157 | C | T | 3   | 6   | --     | --        |
| CakTC06678 | Ca(ICC2/PI489777)SNP_34088 | 464  | T | C | 41  | 29  | --     | --        |
| CakTC26278 | Ca(ICC2/PI489777)SNP_34089 | 325  | A | C | 12  | 6   | --     | --        |
|            | Ca(ICC2/PI489777)SNP_34090 | 461  | G | A | 21  | 13  | --     | --        |
|            | Ca(ICC2/PI489777)SNP_34091 | 866  | G | A | 16  | 8   | --     | --        |
|            | Ca(ICC2/PI489777)SNP_34092 | 928  | C | T | 14  | 8   | --     | --        |
| CakTC26954 | Ca(ICC2/PI489777)SNP_34093 | 157  | A | T | 6   | 6   | --     | --        |
|            | Ca(ICC2/PI489777)SNP_34094 | 487  | G | T | 3   | 4   | --     | --        |
|            | Ca(ICC2/PI489777)SNP_34095 | 2006 | T | G | 6   | 7   | --     | --        |
| CakTC41991 | Ca(ICC2/PI489777)SNP_34096 | 1110 | A | C | 106 | 92  | --     | --        |
|            | Ca(ICC2/PI489777)SNP_34097 | 1137 | C | T | 116 | 100 | --     | --        |
| CakTC37888 | Ca(ICC2/PI489777)SNP_34098 | 962  | C | T | 8   | 3   | --     | --        |
| CakTC29178 | Ca(ICC2/PI489777)SNP_34099 | 518  | G | A | 15  | 20  | --     | --        |
|            | Ca(ICC2/PI489777)SNP_34100 | 755  | T | C | 24  | 22  | --     | --        |
|            | Ca(ICC2/PI489777)SNP_34101 | 758  | A | T | 22  | 21  | --     | --        |
|            | Ca(ICC2/PI489777)SNP_34102 | 1328 | A | G | 32  | 19  | --     | --        |
| CakTC23622 | Ca(ICC2/PI489777)SNP_34103 | 40   | G | A | 5   | 6   | --     | --        |
|            | Ca(ICC2/PI489777)SNP_34104 | 41   | T | C | 5   | 6   | --     | --        |
|            | Ca(ICC2/PI489777)SNP_34105 | 75   | C | G | 6   | 6   | --     | --        |
|            | Ca(ICC2/PI489777)SNP_34106 | 77   | T | G | 6   | 6   | --     | --        |
|            | Ca(ICC2/PI489777)SNP_34107 | 198  | C | T | 18  | 6   | --     | --        |
|            | Ca(ICC2/PI489777)SNP_34108 | 1564 | T | C | 65  | 4   | --     | --        |
| CakTC33234 | Ca(ICC2/PI489777)SNP_34109 | 436  | T | G | 53  | 20  | --     | S1Fa-like |

|            |                             |      |   |   |     |    |           |       |
|------------|-----------------------------|------|---|---|-----|----|-----------|-------|
| CakTC35321 | Ca(ICCV2/PI489777)SNP_34110 | 282  | A | G | 4   | 8  | --        | --    |
|            | Ca(ICCV2/PI489777)SNP_34111 | 1172 | G | T | 8   | 13 | --        | --    |
|            | Ca(ICCV2/PI489777)SNP_34112 | 2661 | A | G | 3   | 6  | --        | --    |
|            | Ca(ICCV2/PI489777)SNP_34113 | 2686 | A | G | 3   | 7  | --        | --    |
|            | Ca(ICCV2/PI489777)SNP_34114 | 2961 | A | G | 4   | 5  | --        | --    |
| CakTC27180 | Ca(ICCV2/PI489777)SNP_34115 | 600  | C | T | 25  | 15 | --        | --    |
|            | Ca(ICCV2/PI489777)SNP_34116 | 1967 | C | T | 6   | 4  | --        | --    |
| CakTC29629 | Ca(ICCV2/PI489777)SNP_34117 | 132  | A | G | 21  | 16 | --        | --    |
|            | Ca(ICCV2/PI489777)SNP_34118 | 524  | T | A | 6   | 17 | --        | --    |
|            | Ca(ICCV2/PI489777)SNP_34119 | 718  | T | C | 4   | 10 | --        | --    |
| CakTC41756 | Ca(ICCV2/PI489777)SNP_34120 | 214  | C | T | 3   | 5  | --        | --    |
|            | Ca(ICCV2/PI489777)SNP_34121 | 652  | T | G | 8   | 3  | --        | --    |
| CakTC33268 | Ca(ICCV2/PI489777)SNP_34122 | 1995 | A | G | 3   | 7  | --        | --    |
|            | Ca(ICCV2/PI489777)SNP_34123 | 2165 | G | C | 3   | 4  | --        | --    |
|            | Ca(ICCV2/PI489777)SNP_34124 | 2184 | G | T | 4   | 4  | --        | --    |
| CakTC38503 | Ca(ICCV2/PI489777)SNP_34125 | 616  | G | A | 38  | 19 | --        | --    |
|            | Ca(ICCV2/PI489777)SNP_34126 | 640  | T | C | 42  | 10 | --        | --    |
|            | Ca(ICCV2/PI489777)SNP_34127 | 657  | G | A | 26  | 9  | --        | --    |
|            | Ca(ICCV2/PI489777)SNP_34128 | 671  | G | C | 43  | 8  | --        | --    |
|            | Ca(ICCV2/PI489777)SNP_34129 | 714  | G | A | 39  | 14 | --        | --    |
|            | Ca(ICCV2/PI489777)SNP_34130 | 828  | G | A | 34  | 16 | --        | --    |
| CakTC22723 | Ca(ICCV2/PI489777)SNP_34131 | 1431 | C | T | 6   | 4  | --        | --    |
| CakTC33184 | Ca(ICCV2/PI489777)SNP_34132 | 178  | G | A | 6   | 30 | --        | TPR   |
|            | Ca(ICCV2/PI489777)SNP_34133 | 231  | A | G | 7   | 35 | --        | TPR   |
|            | Ca(ICCV2/PI489777)SNP_34134 | 1031 | T | C | 8   | 57 | --        | TPR   |
| CakTC31695 | Ca(ICCV2/PI489777)SNP_34135 | 810  | G | T | 10  | 5  | --        | --    |
| CakTC40984 | Ca(ICCV2/PI489777)SNP_34136 | 253  | G | A | 5   | 10 | --        | CCAAT |
|            | Ca(ICCV2/PI489777)SNP_34137 | 288  | C | T | 5   | 12 | --        | CCAAT |
|            | Ca(ICCV2/PI489777)SNP_34138 | 337  | C | T | 6   | 13 | --        | CCAAT |
|            | Ca(ICCV2/PI489777)SNP_34139 | 476  | G | C | 6   | 10 | --        | CCAAT |
|            | Ca(ICCV2/PI489777)SNP_34140 | 526  | A | G | 5   | 8  | --        | CCAAT |
|            | Ca(ICCV2/PI489777)SNP_34141 | 564  | A | T | 6   | 8  | --        | CCAAT |
|            | Ca(ICCV2/PI489777)SNP_34142 | 615  | C | A | 5   | 6  | --        | CCAAT |
| CakTC27856 | Ca(ICCV2/PI489777)SNP_34143 | 398  | G | C | 5   | 4  | Young_pod | --    |
| CakTC38837 | Ca(ICCV2/PI489777)SNP_34144 | 736  | A | T | 6   | 3  | Flower    | bud   |
|            | Ca(ICCV2/PI489777)SNP_34145 | 739  | C | T | 6   | 3  | Flower    | bud   |
|            | Ca(ICCV2/PI489777)SNP_34146 | 787  | C | T | 5   | 5  | Flower    | bud   |
|            | Ca(ICCV2/PI489777)SNP_34147 | 793  | C | T | 5   | 6  | Flower    | bud   |
|            | Ca(ICCV2/PI489777)SNP_34148 | 911  | T | G | 3   | 4  | Flower    | bud   |
|            | Ca(ICCV2/PI489777)SNP_34149 | 945  | C | T | 7   | 6  | Flower    | bud   |
| CakTC26014 | Ca(ICCV2/PI489777)SNP_34150 | 1423 | T | C | 5   | 6  | Young_pod | --    |
| CakTC42514 | Ca(ICCV2/PI489777)SNP_34151 | 201  | A | C | 9   | 9  | --        | --    |
| CakTC42481 | Ca(ICCV2/PI489777)SNP_34152 | 117  | T | G | 9   | 7  | --        | --    |
|            | Ca(ICCV2/PI489777)SNP_34153 | 209  | C | T | 13  | 7  | --        | --    |
| CakTC42112 | Ca(ICCV2/PI489777)SNP_34154 | 776  | G | A | 5   | 5  | --        | --    |
| CakTC31054 | Ca(ICCV2/PI489777)SNP_34155 | 180  | A | C | 4   | 5  | Shoot     | --    |
|            | Ca(ICCV2/PI489777)SNP_34156 | 282  | T | C | 9   | 7  | Shoot     | --    |
|            | Ca(ICCV2/PI489777)SNP_34157 | 799  | A | G | 3   | 22 | Shoot     | --    |
|            | Ca(ICCV2/PI489777)SNP_34158 | 981  | C | T | 4   | 10 | Shoot     | --    |
|            | Ca(ICCV2/PI489777)SNP_34159 | 1064 | C | T | 3   | 10 | Shoot     | --    |
| CakTC24009 | Ca(ICCV2/PI489777)SNP_34160 | 1115 | A | G | 3   | 3  | --        | --    |
|            | Ca(ICCV2/PI489777)SNP_34161 | 1293 | G | T | 9   | 8  | --        | --    |
|            | Ca(ICCV2/PI489777)SNP_34162 | 1417 | A | G | 12  | 10 | --        | --    |
|            | Ca(ICCV2/PI489777)SNP_34163 | 2992 | T | G | 17  | 13 | --        | --    |
| CakTC26215 | Ca(ICCV2/PI489777)SNP_34164 | 195  | T | C | 106 | 63 | --        | --    |
| CakTC25353 | Ca(ICCV2/PI489777)SNP_34165 | 1151 | T | C | 13  | 3  | --        | --    |
| CakTC24967 | Ca(ICCV2/PI489777)SNP_34166 | 873  | T | C | 69  | 23 | --        | --    |
|            | Ca(ICCV2/PI489777)SNP_34167 | 1017 | A | G | 64  | 18 | --        | --    |
|            | Ca(ICCV2/PI489777)SNP_34168 | 1241 | C | T | 25  | 4  | --        | --    |
|            | Ca(ICCV2/PI489777)SNP_34169 | 2718 | A | C | 13  | 8  | --        | --    |
| CakTC37876 | Ca(ICCV2/PI489777)SNP_34170 | 403  | T | C | 3   | 4  | --        | --    |
|            | Ca(ICCV2/PI489777)SNP_34171 | 551  | G | A | 3   | 4  | --        | --    |
|            | Ca(ICCV2/PI489777)SNP_34172 | 819  | T | C | 8   | 3  | --        | --    |
|            | Ca(ICCV2/PI489777)SNP_34173 | 872  | A | G | 8   | 3  | --        | --    |
| CakTC27705 | Ca(ICCV2/PI489777)SNP_34174 | 182  | C | T | 3   | 3  | Flower    | bud   |
| CakTC38823 | Ca(ICCV2/PI489777)SNP_34175 | 924  | A | G | 16  | 4  | --        | --    |
|            | Ca(ICCV2/PI489777)SNP_34176 | 1125 | A | T | 17  | 8  | --        | --    |
|            | Ca(ICCV2/PI489777)SNP_34177 | 1392 | G | A | 7   | 4  | --        | --    |
| CakTC35678 | Ca(ICCV2/PI489777)SNP_34178 | 1530 | A | C | 23  | 18 | --        | TPR   |
|            | Ca(ICCV2/PI489777)SNP_34179 | 1995 | A | G | 20  | 11 | --        | TPR   |
|            | Ca(ICCV2/PI489777)SNP_34180 | 2097 | A | G | 17  | 14 | --        | TPR   |
|            | Ca(ICCV2/PI489777)SNP_34181 | 2589 | C | T | 35  | 12 | --        | TPR   |
| CakTC06782 | Ca(ICCV2/PI489777)SNP_34182 | 2551 | C | T | 4   | 3  | --        | PHD   |
|            | Ca(ICCV2/PI489777)SNP_34183 | 2590 | T | C | 4   | 4  | --        | PHD   |

|            |                            |      |   |   |    |     |        |              |
|------------|----------------------------|------|---|---|----|-----|--------|--------------|
| CakTC41276 | Ca(ICC2/PI489777)SNP_34184 | 268  | T | C | 8  | 16  | --     | --           |
|            | Ca(ICC2/PI489777)SNP_34185 | 1825 | G | A | 32 | 32  | --     | --           |
|            | Ca(ICC2/PI489777)SNP_34186 | 2029 | T | C | 32 | 39  | --     | --           |
| CakTC29049 | Ca(ICC2/PI489777)SNP_34187 | 630  | G | A | 24 | 13  | --     | TCP          |
|            | Ca(ICC2/PI489777)SNP_34188 | 716  | T | A | 30 | 16  | --     | TCP          |
|            | Ca(ICC2/PI489777)SNP_34189 | 764  | C | A | 32 | 10  | --     | TCP          |
|            | Ca(ICC2/PI489777)SNP_34190 | 854  | G | C | 32 | 14  | --     | TCP          |
|            | Ca(ICC2/PI489777)SNP_34191 | 942  | A | G | 28 | 11  | --     | TCP          |
|            | Ca(ICC2/PI489777)SNP_34192 | 1230 | A | G | 13 | 6   | --     | TCP          |
|            | Ca(ICC2/PI489777)SNP_34193 | 1447 | G | C | 11 | 10  | --     | TCP          |
|            | Ca(ICC2/PI489777)SNP_34194 | 1478 | G | T | 10 | 11  | --     | TCP          |
|            | Ca(ICC2/PI489777)SNP_34195 | 1535 | T | A | 15 | 8   | --     | TCP          |
|            | Ca(ICC2/PI489777)SNP_34196 | 1547 | G | A | 14 | 10  | --     | TCP          |
|            | Ca(ICC2/PI489777)SNP_34197 | 1678 | G | C | 18 | 13  | --     | TCP          |
|            | Ca(ICC2/PI489777)SNP_34198 | 1859 | T | C | 11 | 9   | --     | TCP          |
| CakTC11742 | Ca(ICC2/PI489777)SNP_34199 | 158  | T | A | 3  | 3   | Flower | bud          |
|            | Ca(ICC2/PI489777)SNP_34200 | 189  | T | C | 3  | 4   | Flower | bud          |
| CakTC29158 | Ca(ICC2/PI489777)SNP_34201 | 4113 | A | C | 6  | 3   | --     | --           |
|            | Ca(ICC2/PI489777)SNP_34202 | 4210 | T | C | 8  | 5   | --     | --           |
| CakTC09585 | Ca(ICC2/PI489777)SNP_34203 | 398  | T | C | 4  | 3   | --     | --           |
|            | Ca(ICC2/PI489777)SNP_34204 | 1033 | A | G | 10 | 3   | --     | --           |
| CakTC40026 | Ca(ICC2/PI489777)SNP_34205 | 446  | C | T | 17 | 7   | --     | --           |
|            | Ca(ICC2/PI489777)SNP_34206 | 516  | T | C | 19 | 7   | --     | --           |
|            | Ca(ICC2/PI489777)SNP_34207 | 527  | G | A | 16 | 6   | --     | --           |
|            | Ca(ICC2/PI489777)SNP_34208 | 1124 | G | A | 10 | 5   | --     | --           |
| CakTC26966 | Ca(ICC2/PI489777)SNP_34209 | 381  | A | G | 89 | 42  | --     | --           |
| CakTC38110 | Ca(ICC2/PI489777)SNP_34210 | 262  | T | C | 4  | 6   | --     | --           |
| CakTC27750 | Ca(ICC2/PI489777)SNP_34211 | 302  | A | T | 9  | 3   | --     | --           |
|            | Ca(ICC2/PI489777)SNP_34212 | 547  | C | G | 10 | 9   | --     | --           |
|            | Ca(ICC2/PI489777)SNP_34213 | 628  | G | C | 16 | 8   | --     | --           |
|            | Ca(ICC2/PI489777)SNP_34214 | 967  | T | C | 10 | 3   | --     | --           |
| CakTC37196 | Ca(ICC2/PI489777)SNP_34215 | 200  | G | A | 24 | 13  | --     | --           |
|            | Ca(ICC2/PI489777)SNP_34216 | 212  | T | G | 16 | 11  | --     | --           |
|            | Ca(ICC2/PI489777)SNP_34217 | 671  | A | G | 32 | 15  | --     | --           |
| CakTC29298 | Ca(ICC2/PI489777)SNP_34218 | 545  | A | G | 11 | 9   | --     | --           |
|            | Ca(ICC2/PI489777)SNP_34219 | 1034 | G | T | 8  | 5   | --     | --           |
| CakTC42655 | Ca(ICC2/PI489777)SNP_34220 | 900  | T | C | 5  | 6   | --     | Sigma70-like |
| CakTC35705 | Ca(ICC2/PI489777)SNP_34221 | 106  | T | C | 15 | 5   | --     | --           |
|            | Ca(ICC2/PI489777)SNP_34222 | 392  | G | A | 13 | 5   | --     | --           |
|            | Ca(ICC2/PI489777)SNP_34223 | 866  | G | A | 4  | 6   | --     | --           |
|            | Ca(ICC2/PI489777)SNP_34224 | 1967 | A | G | 18 | 10  | --     | --           |
|            | Ca(ICC2/PI489777)SNP_34225 | 2114 | C | G | 8  | 5   | --     | --           |
|            | Ca(ICC2/PI489777)SNP_34226 | 2553 | C | G | 17 | 9   | --     | --           |
|            | Ca(ICC2/PI489777)SNP_34227 | 3170 | T | A | 13 | 11  | --     | --           |
|            | Ca(ICC2/PI489777)SNP_34228 | 3647 | T | C | 12 | 5   | --     | --           |
| CakTC22453 | Ca(ICC2/PI489777)SNP_34229 | 191  | A | G | 20 | 7   | --     | --           |
|            | Ca(ICC2/PI489777)SNP_34230 | 244  | G | C | 27 | 12  | --     | --           |
|            | Ca(ICC2/PI489777)SNP_34231 | 542  | G | A | 14 | 4   | --     | --           |
| CakTC26359 | Ca(ICC2/PI489777)SNP_34232 | 668  | G | C | 4  | 6   | --     | --           |
| CakTC30262 | Ca(ICC2/PI489777)SNP_34233 | 410  | T | C | 11 | 3   | --     | --           |
|            | Ca(ICC2/PI489777)SNP_34234 | 452  | A | G | 12 | 3   | --     | --           |
|            | Ca(ICC2/PI489777)SNP_34235 | 1046 | T | G | 13 | 3   | --     | --           |
|            | Ca(ICC2/PI489777)SNP_34236 | 1624 | G | T | 12 | 7   | --     | --           |
|            | Ca(ICC2/PI489777)SNP_34237 | 1861 | T | C | 7  | 3   | --     | --           |
|            | Ca(ICC2/PI489777)SNP_34238 | 1879 | G | C | 6  | 4   | --     | --           |
| CakTC32117 | Ca(ICC2/PI489777)SNP_34239 | 646  | G | C | 9  | 3   | Shoot  | SET          |
| CakTC34358 | Ca(ICC2/PI489777)SNP_34240 | 604  | G | A | 13 | 8   | --     | --           |
|            | Ca(ICC2/PI489777)SNP_34241 | 1681 | T | C | 4  | 5   | --     | --           |
|            | Ca(ICC2/PI489777)SNP_34242 | 1791 | G | A | 6  | 6   | --     | --           |
| CakTC29401 | Ca(ICC2/PI489777)SNP_34243 | 145  | A | C | 28 | 16  | --     | --           |
|            | Ca(ICC2/PI489777)SNP_34244 | 196  | G | A | 35 | 20  | --     | --           |
|            | Ca(ICC2/PI489777)SNP_34245 | 234  | A | G | 57 | 80  | --     | --           |
|            | Ca(ICC2/PI489777)SNP_34246 | 280  | C | T | 53 | 97  | --     | --           |
|            | Ca(ICC2/PI489777)SNP_34247 | 297  | G | C | 68 | 98  | --     | --           |
|            | Ca(ICC2/PI489777)SNP_34248 | 307  | T | A | 71 | 96  | --     | --           |
|            | Ca(ICC2/PI489777)SNP_34249 | 481  | A | T | 74 | 110 | --     | --           |
|            | Ca(ICC2/PI489777)SNP_34250 | 627  | C | G | 55 | 79  | --     | --           |
| CakTC39908 | Ca(ICC2/PI489777)SNP_34251 | 97   | A | G | 16 | 3   | --     | --           |
| CakTC41611 | Ca(ICC2/PI489777)SNP_34252 | 682  | G | A | 14 | 20  | --     | --           |
|            | Ca(ICC2/PI489777)SNP_34253 | 751  | C | T | 18 | 16  | --     | --           |
|            | Ca(ICC2/PI489777)SNP_34254 | 862  | T | C | 20 | 17  | --     | --           |
|            | Ca(ICC2/PI489777)SNP_34255 | 1944 | G | T | 10 | 4   | --     | --           |
|            | Ca(ICC2/PI489777)SNP_34256 | 1984 | C | T | 11 | 5   | --     | --           |
|            | Ca(ICC2/PI489777)SNP_34257 | 2107 | T | C | 10 | 7   | --     | --           |

|            |                            |      |   |   |     |    |           |              |
|------------|----------------------------|------|---|---|-----|----|-----------|--------------|
| CakTC05220 | Ca(ICC2/PI489777)SNP_34258 | 226  | A | C | 5   | 3  | --        | --           |
|            | Ca(ICC2/PI489777)SNP_34259 | 366  | C | G | 5   | 3  | --        | --           |
| CakTC24959 | Ca(ICC2/PI489777)SNP_34260 | 88   | C | T | 25  | 7  | --        | --           |
|            | Ca(ICC2/PI489777)SNP_34261 | 112  | G | A | 28  | 7  | --        | --           |
|            | Ca(ICC2/PI489777)SNP_34262 | 180  | C | T | 38  | 17 | --        | --           |
|            | Ca(ICC2/PI489777)SNP_34263 | 237  | T | A | 54  | 22 | --        | --           |
|            | Ca(ICC2/PI489777)SNP_34264 | 357  | T | C | 55  | 32 | --        | --           |
|            | Ca(ICC2/PI489777)SNP_34265 | 381  | C | G | 55  | 32 | --        | --           |
|            | Ca(ICC2/PI489777)SNP_34266 | 787  | G | A | 57  | 17 | --        | --           |
|            | Ca(ICC2/PI489777)SNP_34267 | 3505 | T | A | 47  | 7  | --        | --           |
|            | Ca(ICC2/PI489777)SNP_34268 | 3987 | A | G | 141 | 60 | --        | --           |
|            | Ca(ICC2/PI489777)SNP_34269 | 4127 | A | C | 73  | 22 | --        | --           |
|            | Ca(ICC2/PI489777)SNP_34270 | 4129 | A | G | 71  | 23 | --        | --           |
|            | Ca(ICC2/PI489777)SNP_34271 | 4170 | G | A | 51  | 13 | --        | --           |
| CakTC27084 | Ca(ICC2/PI489777)SNP_34272 | 169  | C | G | 18  | 22 | --        | --           |
|            | Ca(ICC2/PI489777)SNP_34273 | 207  | A | C | 23  | 25 | --        | --           |
|            | Ca(ICC2/PI489777)SNP_34274 | 216  | A | G | 23  | 27 | --        | --           |
| CakTC36291 | Ca(ICC2/PI489777)SNP_34275 | 855  | T | A | 39  | 41 | --        | --           |
|            | Ca(ICC2/PI489777)SNP_34276 | 1074 | G | A | 45  | 36 | --        | --           |
| CakTC28979 | Ca(ICC2/PI489777)SNP_34277 | 640  | A | G | 12  | 8  | --        | --           |
| CakTC39855 | Ca(ICC2/PI489777)SNP_34278 | 5    | G | C | 4   | 3  | --        | --           |
|            | Ca(ICC2/PI489777)SNP_34279 | 54   | A | T | 5   | 4  | --        | --           |
|            | Ca(ICC2/PI489777)SNP_34280 | 679  | T | C | 6   | 4  | --        | --           |
|            | Ca(ICC2/PI489777)SNP_34281 | 803  | A | G | 4   | 10 | --        | --           |
|            | Ca(ICC2/PI489777)SNP_34282 | 1091 | T | A | 5   | 12 | --        | --           |
| CakTC36074 | Ca(ICC2/PI489777)SNP_34283 | 120  | C | G | 4   | 4  | Flower    | bud          |
|            | Ca(ICC2/PI489777)SNP_34284 | 164  | A | C | 5   | 4  | Flower    | bud          |
|            | Ca(ICC2/PI489777)SNP_34285 | 210  | A | G | 5   | 3  | Flower    | bud          |
| CakTC10650 | Ca(ICC2/PI489777)SNP_34286 | 406  | C | A | 37  | 98 | --        | --           |
|            | Ca(ICC2/PI489777)SNP_34287 | 658  | T | C | 32  | 51 | --        | --           |
|            | Ca(ICC2/PI489777)SNP_34288 | 686  | T | C | 17  | 22 | --        | --           |
| CakTC23087 | Ca(ICC2/PI489777)SNP_34289 | 233  | A | G | 4   | 4  | --        | --           |
| CakTC12815 | Ca(ICC2/PI489777)SNP_34290 | 1879 | A | G | 6   | 3  | --        | --           |
| CakTC25372 | Ca(ICC2/PI489777)SNP_34291 | 172  | G | C | 40  | 3  | --        | C2C2-CO-like |
|            | Ca(ICC2/PI489777)SNP_34292 | 312  | C | T | 66  | 10 | --        | C2C2-CO-like |
|            | Ca(ICC2/PI489777)SNP_34293 | 1177 | G | A | 72  | 10 | --        | C2C2-CO-like |
| CakTC36136 | Ca(ICC2/PI489777)SNP_34294 | 1027 | C | T | 6   | 4  | --        | --           |
| CakTC29630 | Ca(ICC2/PI489777)SNP_34295 | 116  | A | T | 9   | 6  | Shoot     | --           |
| CakTC41766 | Ca(ICC2/PI489777)SNP_34296 | 336  | T | A | 8   | 15 | --        | --           |
| CakTC42260 | Ca(ICC2/PI489777)SNP_34297 | 633  | T | C | 7   | 3  | --        | --           |
|            | Ca(ICC2/PI489777)SNP_34298 | 732  | C | T | 7   | 3  | --        | --           |
|            | Ca(ICC2/PI489777)SNP_34299 | 750  | G | T | 6   | 3  | --        | --           |
| CakTC04097 | Ca(ICC2/PI489777)SNP_34300 | 491  | G | A | 6   | 4  | --        | --           |
| CakTC37791 | Ca(ICC2/PI489777)SNP_34301 | 566  | T | C | 27  | 10 | --        | --           |
|            | Ca(ICC2/PI489777)SNP_34302 | 606  | T | G | 23  | 9  | --        | --           |
|            | Ca(ICC2/PI489777)SNP_34303 | 834  | G | A | 17  | 12 | --        | --           |
|            | Ca(ICC2/PI489777)SNP_34304 | 1248 | G | A | 16  | 8  | --        | --           |
|            | Ca(ICC2/PI489777)SNP_34305 | 1380 | A | G | 22  | 15 | --        | --           |
| CakTC25135 | Ca(ICC2/PI489777)SNP_34306 | 132  | T | C | 7   | 5  | --        | --           |
|            | Ca(ICC2/PI489777)SNP_34307 | 263  | C | T | 10  | 8  | --        | --           |
|            | Ca(ICC2/PI489777)SNP_34308 | 280  | T | C | 11  | 8  | --        | --           |
|            | Ca(ICC2/PI489777)SNP_34309 | 340  | C | A | 9   | 7  | --        | --           |
|            | Ca(ICC2/PI489777)SNP_34310 | 344  | A | T | 10  | 8  | --        | --           |
|            | Ca(ICC2/PI489777)SNP_34311 | 397  | T | C | 10  | 8  | --        | --           |
|            | Ca(ICC2/PI489777)SNP_34312 | 442  | A | C | 10  | 11 | --        | --           |
|            | Ca(ICC2/PI489777)SNP_34313 | 885  | A | C | 10  | 6  | --        | --           |
| CakTC29969 | Ca(ICC2/PI489777)SNP_34314 | 244  | C | T | 15  | 10 | --        | --           |
|            | Ca(ICC2/PI489777)SNP_34315 | 623  | T | G | 15  | 13 | --        | --           |
|            | Ca(ICC2/PI489777)SNP_34316 | 865  | A | G | 15  | 15 | --        | --           |
|            | Ca(ICC2/PI489777)SNP_34317 | 1039 | A | G | 16  | 23 | --        | --           |
|            | Ca(ICC2/PI489777)SNP_34318 | 1655 | C | T | 21  | 5  | --        | --           |
|            | Ca(ICC2/PI489777)SNP_34319 | 1827 | G | A | 8   | 3  | --        | --           |
| CakTC40108 | Ca(ICC2/PI489777)SNP_34320 | 344  | A | G | 6   | 4  | Shoot     | --           |
| CakTC30545 | Ca(ICC2/PI489777)SNP_34321 | 1632 | T | C | 13  | 4  | --        | --           |
| CakTC42055 | Ca(ICC2/PI489777)SNP_34322 | 272  | C | T | 5   | 6  | --        | --           |
|            | Ca(ICC2/PI489777)SNP_34323 | 336  | G | A | 5   | 6  | --        | --           |
| CakTC26853 | Ca(ICC2/PI489777)SNP_34324 | 774  | T | G | 186 | 64 | --        | --           |
| CakTC26906 | Ca(ICC2/PI489777)SNP_34325 | 503  | T | G | 4   | 3  | --        | --           |
|            | Ca(ICC2/PI489777)SNP_34326 | 699  | A | G | 3   | 3  | --        | --           |
|            | Ca(ICC2/PI489777)SNP_34327 | 1708 | T | C | 5   | 3  | --        | --           |
|            | Ca(ICC2/PI489777)SNP_34328 | 2923 | A | G | 10  | 4  | --        | --           |
| CakTC27822 | Ca(ICC2/PI489777)SNP_34329 | 1152 | G | C | 15  | 8  | --        | --           |
|            | Ca(ICC2/PI489777)SNP_34330 | 1244 | G | A | 6   | 3  | --        | --           |
| CakTC30015 | Ca(ICC2/PI489777)SNP_34331 | 267  | T | G | 7   | 4  | Young_pod | --           |



|            |                            |      |   |   |     |    |           |              |
|------------|----------------------------|------|---|---|-----|----|-----------|--------------|
|            | Ca(ICC2/P1489777)SNP_34332 | 268  | A | C | 8   | 4  | Young_pod | --           |
|            | Ca(ICC2/P1489777)SNP_34333 | 1036 | A | G | 7   | 3  | Young_pod | --           |
| CakTC37901 | Ca(ICC2/P1489777)SNP_34334 | 15   | A | G | 29  | 18 | --        | --           |
|            | Ca(ICC2/P1489777)SNP_34335 | 518  | G | A | 70  | 41 | --        | --           |
|            | Ca(ICC2/P1489777)SNP_34336 | 749  | C | T | 11  | 18 | --        | --           |
| CakTC12766 | Ca(ICC2/P1489777)SNP_34337 | 153  | T | G | 19  | 13 | --        | --           |
|            | Ca(ICC2/P1489777)SNP_34338 | 314  | T | C | 33  | 32 | --        | --           |
|            | Ca(ICC2/P1489777)SNP_34339 | 322  | A | G | 31  | 32 | --        | --           |
|            | Ca(ICC2/P1489777)SNP_34340 | 417  | C | T | 33  | 25 | --        | --           |
| CakTC42711 | Ca(ICC2/P1489777)SNP_34341 | 703  | T | A | 55  | 46 | --        | --           |
| CakTC38372 | Ca(ICC2/P1489777)SNP_34342 | 176  | C | T | 6   | 3  | --        | --           |
| CakTC23444 | Ca(ICC2/P1489777)SNP_34343 | 865  | A | G | 59  | 12 | --        | --           |
|            | Ca(ICC2/P1489777)SNP_34344 | 1111 | C | T | 39  | 15 | --        | --           |
|            | Ca(ICC2/P1489777)SNP_34345 | 1480 | G | A | 70  | 19 | --        | --           |
| CakTC11474 | Ca(ICC2/P1489777)SNP_34346 | 33   | C | G | 3   | 5  | Flower    | bud          |
|            | Ca(ICC2/P1489777)SNP_34347 | 58   | T | G | 3   | 5  | Flower    | bud          |
|            | Ca(ICC2/P1489777)SNP_34348 | 68   | G | A | 3   | 4  | Flower    | bud          |
| CakTC31204 | Ca(ICC2/P1489777)SNP_34349 | 836  | C | A | 5   | 5  | --        | --           |
|            | Ca(ICC2/P1489777)SNP_34350 | 2417 | G | A | 3   | 5  | --        | --           |
| CakTC25694 | Ca(ICC2/P1489777)SNP_34351 | 1786 | A | G | 5   | 6  | --        | --           |
|            | Ca(ICC2/P1489777)SNP_34352 | 3951 | A | C | 7   | 5  | --        | --           |
|            | Ca(ICC2/P1489777)SNP_34353 | 4362 | A | G | 5   | 8  | --        | --           |
| CakTC29632 | Ca(ICC2/P1489777)SNP_34354 | 888  | C | A | 16  | 6  | --        | --           |
| CakTC34581 | Ca(ICC2/P1489777)SNP_34355 | 724  | A | G | 16  | 23 | --        | --           |
| CakTC33513 | Ca(ICC2/P1489777)SNP_34356 | 360  | C | T | 13  | 5  | --        | --           |
|            | Ca(ICC2/P1489777)SNP_34357 | 622  | C | T | 16  | 12 | --        | --           |
| CakTC23704 | Ca(ICC2/P1489777)SNP_34358 | 453  | C | A | 4   | 4  | --        | --           |
| CakTC23636 | Ca(ICC2/P1489777)SNP_34359 | 201  | T | A | 7   | 3  | --        | --           |
|            | Ca(ICC2/P1489777)SNP_34360 | 2075 | G | A | 23  | 4  | --        | --           |
| CakTC31297 | Ca(ICC2/P1489777)SNP_34361 | 854  | T | C | 3   | 8  | --        | --           |
| CakTC38016 | Ca(ICC2/P1489777)SNP_34362 | 359  | G | A | 9   | 8  | --        | --           |
|            | Ca(ICC2/P1489777)SNP_34363 | 780  | T | C | 21  | 17 | --        | --           |
|            | Ca(ICC2/P1489777)SNP_34364 | 816  | A | G | 22  | 19 | --        | --           |
|            | Ca(ICC2/P1489777)SNP_34365 | 1206 | T | A | 13  | 10 | --        | --           |
|            | Ca(ICC2/P1489777)SNP_34366 | 1429 | T | G | 4   | 4  | --        | --           |
| CakTC33840 | Ca(ICC2/P1489777)SNP_34367 | 1151 | A | G | 11  | 3  | --        | Pseudo_ARR-B |
| CakTC25089 | Ca(ICC2/P1489777)SNP_34368 | 69   | C | T | 4   | 3  | --        | --           |
| CakTC25495 | Ca(ICC2/P1489777)SNP_34369 | 1692 | G | A | 12  | 5  | --        | SET          |
| CakTC38229 | Ca(ICC2/P1489777)SNP_34370 | 578  | T | C | 46  | 72 | --        | --           |
|            | Ca(ICC2/P1489777)SNP_34371 | 722  | C | T | 40  | 39 | --        | --           |
| CakTC33724 | Ca(ICC2/P1489777)SNP_34372 | 128  | T | C | 3   | 6  | --        | --           |
|            | Ca(ICC2/P1489777)SNP_34373 | 339  | T | C | 5   | 8  | --        | --           |
| CakTC23879 | Ca(ICC2/P1489777)SNP_34374 | 418  | A | T | 26  | 4  | --        | --           |
|            | Ca(ICC2/P1489777)SNP_34375 | 422  | A | G | 26  | 4  | --        | --           |
|            | Ca(ICC2/P1489777)SNP_34376 | 456  | C | T | 26  | 4  | --        | --           |
|            | Ca(ICC2/P1489777)SNP_34377 | 457  | A | G | 25  | 4  | --        | --           |
|            | Ca(ICC2/P1489777)SNP_34378 | 478  | G | T | 25  | 5  | --        | --           |
|            | Ca(ICC2/P1489777)SNP_34379 | 510  | A | G | 24  | 6  | --        | --           |
|            | Ca(ICC2/P1489777)SNP_34380 | 1351 | A | G | 40  | 15 | --        | --           |
|            | Ca(ICC2/P1489777)SNP_34381 | 1555 | A | C | 38  | 11 | --        | --           |
| CakTC29016 | Ca(ICC2/P1489777)SNP_34382 | 1051 | G | T | 5   | 4  | --        | --           |
| CakTC25644 | Ca(ICC2/P1489777)SNP_34383 | 301  | A | C | 4   | 3  | --        | --           |
|            | Ca(ICC2/P1489777)SNP_34384 | 449  | A | G | 11  | 9  | --        | --           |
|            | Ca(ICC2/P1489777)SNP_34385 | 531  | A | G | 13  | 16 | --        | --           |
|            | Ca(ICC2/P1489777)SNP_34386 | 565  | A | G | 16  | 16 | --        | --           |
|            | Ca(ICC2/P1489777)SNP_34387 | 783  | C | G | 18  | 15 | --        | --           |
|            | Ca(ICC2/P1489777)SNP_34388 | 1177 | G | C | 21  | 5  | --        | --           |
|            | Ca(ICC2/P1489777)SNP_34389 | 1222 | G | T | 23  | 20 | --        | --           |
|            | Ca(ICC2/P1489777)SNP_34390 | 1319 | C | A | 38  | 29 | --        | --           |
|            | Ca(ICC2/P1489777)SNP_34391 | 1333 | T | C | 40  | 26 | --        | --           |
|            | Ca(ICC2/P1489777)SNP_34392 | 1797 | A | G | 101 | 39 | --        | --           |
|            | Ca(ICC2/P1489777)SNP_34393 | 1846 | A | T | 85  | 19 | --        | --           |
|            | Ca(ICC2/P1489777)SNP_34394 | 1880 | A | C | 80  | 15 | --        | --           |
|            | Ca(ICC2/P1489777)SNP_34395 | 1882 | C | A | 88  | 14 | --        | --           |
|            | Ca(ICC2/P1489777)SNP_34396 | 1936 | T | C | 79  | 12 | --        | --           |
|            | Ca(ICC2/P1489777)SNP_34397 | 1959 | C | T | 78  | 9  | --        | --           |
|            | Ca(ICC2/P1489777)SNP_34398 | 1963 | A | C | 73  | 9  | --        | --           |
|            | Ca(ICC2/P1489777)SNP_34399 | 2003 | C | T | 58  | 9  | --        | --           |
|            | Ca(ICC2/P1489777)SNP_34400 | 2034 | G | T | 55  | 9  | --        | --           |
|            | Ca(ICC2/P1489777)SNP_34401 | 2046 | T | C | 53  | 8  | --        | --           |
|            | Ca(ICC2/P1489777)SNP_34402 | 2080 | C | T | 37  | 6  | --        | --           |
|            | Ca(ICC2/P1489777)SNP_34403 | 2116 | A | G | 31  | 5  | --        | --           |
|            | Ca(ICC2/P1489777)SNP_34404 | 2137 | C | A | 29  | 5  | --        | --           |
| CakTC42413 | Ca(ICC2/P1489777)SNP_34405 | 175  | T | C | 16  | 9  | --        | --           |

|            |                            |      |   |   |    |    |           |    |
|------------|----------------------------|------|---|---|----|----|-----------|----|
|            | Ca(ICC2/PI489777)SNP_34406 | 276  | G | A | 15 | 8  | --        | -- |
|            | Ca(ICC2/PI489777)SNP_34407 | 609  | T | C | 13 | 7  | --        | -- |
|            | Ca(ICC2/PI489777)SNP_34408 | 1039 | T | C | 39 | 12 | --        | -- |
| CakTC33258 | Ca(ICC2/PI489777)SNP_34409 | 112  | T | C | 5  | 7  | --        | -- |
|            | Ca(ICC2/PI489777)SNP_34410 | 265  | C | A | 6  | 5  | --        | -- |
|            | Ca(ICC2/PI489777)SNP_34411 | 333  | A | T | 10 | 6  | --        | -- |
|            | Ca(ICC2/PI489777)SNP_34412 | 360  | T | C | 11 | 6  | --        | -- |
|            | Ca(ICC2/PI489777)SNP_34413 | 384  | G | A | 10 | 6  | --        | -- |
|            | Ca(ICC2/PI489777)SNP_34414 | 990  | C | T | 8  | 12 | --        | -- |
|            | Ca(ICC2/PI489777)SNP_34415 | 2044 | G | C | 3  | 4  | --        | -- |
| CakTC33135 | Ca(ICC2/PI489777)SNP_34416 | 794  | A | G | 18 | 8  | --        | -- |
|            | Ca(ICC2/PI489777)SNP_34417 | 968  | T | C | 20 | 14 | --        | -- |
| CakTC12966 | Ca(ICC2/PI489777)SNP_34418 | 631  | C | A | 16 | 9  | --        | -- |
|            | Ca(ICC2/PI489777)SNP_34419 | 673  | C | T | 15 | 15 | --        | -- |
|            | Ca(ICC2/PI489777)SNP_34420 | 832  | T | C | 18 | 15 | --        | -- |
| CakTC08457 | Ca(ICC2/PI489777)SNP_34421 | 791  | G | A | 5  | 4  | --        | -- |
|            | Ca(ICC2/PI489777)SNP_34422 | 905  | A | G | 5  | 4  | --        | -- |
| CakTC40242 | Ca(ICC2/PI489777)SNP_34423 | 303  | T | A | 13 | 5  | --        | -- |
|            | Ca(ICC2/PI489777)SNP_34424 | 696  | T | G | 6  | 5  | --        | -- |
|            | Ca(ICC2/PI489777)SNP_34425 | 930  | A | C | 8  | 10 | --        | -- |
|            | Ca(ICC2/PI489777)SNP_34426 | 1026 | G | A | 9  | 12 | --        | -- |
| CakTC00613 | Ca(ICC2/PI489777)SNP_34427 | 480  | C | T | 3  | 3  | --        | -- |
| CakTC40583 | Ca(ICC2/PI489777)SNP_34428 | 411  | T | C | 34 | 23 | --        | -- |
|            | Ca(ICC2/PI489777)SNP_34429 | 530  | T | C | 19 | 21 | --        | -- |
|            | Ca(ICC2/PI489777)SNP_34430 | 577  | G | C | 13 | 19 | --        | -- |
|            | Ca(ICC2/PI489777)SNP_34431 | 594  | A | G | 12 | 7  | --        | -- |
|            | Ca(ICC2/PI489777)SNP_34432 | 680  | G | C | 3  | 3  | --        | -- |
| CakTC38940 | Ca(ICC2/PI489777)SNP_34433 | 137  | A | T | 19 | 3  | --        | -- |
|            | Ca(ICC2/PI489777)SNP_34434 | 279  | G | T | 20 | 4  | --        | -- |
|            | Ca(ICC2/PI489777)SNP_34435 | 354  | C | T | 23 | 3  | --        | -- |
|            | Ca(ICC2/PI489777)SNP_34436 | 373  | A | G | 23 | 4  | --        | -- |
|            | Ca(ICC2/PI489777)SNP_34437 | 765  | G | C | 14 | 4  | --        | -- |
|            | Ca(ICC2/PI489777)SNP_34438 | 878  | A | T | 16 | 6  | --        | -- |
|            | Ca(ICC2/PI489777)SNP_34439 | 974  | T | C | 18 | 6  | --        | -- |
| CakTC24793 | Ca(ICC2/PI489777)SNP_34440 | 422  | A | T | 11 | 6  | --        | -- |
|            | Ca(ICC2/PI489777)SNP_34441 | 494  | A | T | 10 | 7  | --        | -- |
|            | Ca(ICC2/PI489777)SNP_34442 | 660  | A | G | 10 | 7  | --        | -- |
|            | Ca(ICC2/PI489777)SNP_34443 | 832  | C | G | 6  | 3  | --        | -- |
| CakTC38778 | Ca(ICC2/PI489777)SNP_34444 | 965  | C | T | 14 | 9  | --        | -- |
|            | Ca(ICC2/PI489777)SNP_34445 | 1184 | A | G | 15 | 10 | --        | -- |
|            | Ca(ICC2/PI489777)SNP_34446 | 1358 | G | A | 19 | 4  | --        | -- |
|            | Ca(ICC2/PI489777)SNP_34447 | 1417 | G | A | 17 | 5  | --        | -- |
| CakTC40836 | Ca(ICC2/PI489777)SNP_34448 | 299  | C | T | 6  | 3  | --        | -- |
|            | Ca(ICC2/PI489777)SNP_34449 | 500  | G | T | 4  | 3  | --        | -- |
|            | Ca(ICC2/PI489777)SNP_34450 | 507  | C | A | 4  | 3  | --        | -- |
|            | Ca(ICC2/PI489777)SNP_34451 | 531  | T | C | 5  | 3  | --        | -- |
|            | Ca(ICC2/PI489777)SNP_34452 | 1233 | C | A | 5  | 3  | --        | -- |
|            | Ca(ICC2/PI489777)SNP_34453 | 1278 | G | C | 4  | 3  | --        | -- |
|            | Ca(ICC2/PI489777)SNP_34454 | 1515 | C | T | 6  | 3  | --        | -- |
|            | Ca(ICC2/PI489777)SNP_34455 | 1539 | A | G | 7  | 3  | --        | -- |
| CakTC42155 | Ca(ICC2/PI489777)SNP_34456 | 646  | T | C | 15 | 7  | --        | -- |
| CakTC08686 | Ca(ICC2/PI489777)SNP_34457 | 411  | A | G | 3  | 5  | Young_pod | -- |
| CakTC00656 | Ca(ICC2/PI489777)SNP_34458 | 958  | T | G | 3  | 3  | --        | -- |
|            | Ca(ICC2/PI489777)SNP_34459 | 1120 | T | C | 7  | 3  | --        | -- |
| CakTC33106 | Ca(ICC2/PI489777)SNP_34460 | 161  | T | C | 9  | 4  | --        | -- |
|            | Ca(ICC2/PI489777)SNP_34461 | 218  | T | A | 19 | 6  | --        | -- |
|            | Ca(ICC2/PI489777)SNP_34462 | 390  | A | G | 20 | 5  | --        | -- |
|            | Ca(ICC2/PI489777)SNP_34463 | 590  | T | C | 17 | 4  | --        | -- |
|            | Ca(ICC2/PI489777)SNP_34464 | 686  | C | T | 4  | 4  | --        | -- |
|            | Ca(ICC2/PI489777)SNP_34465 | 929  | G | T | 6  | 6  | --        | -- |
|            | Ca(ICC2/PI489777)SNP_34466 | 949  | C | T | 6  | 5  | --        | -- |
|            | Ca(ICC2/PI489777)SNP_34467 | 1370 | T | C | 14 | 4  | --        | -- |
|            | Ca(ICC2/PI489777)SNP_34468 | 1505 | A | T | 17 | 5  | --        | -- |
|            | Ca(ICC2/PI489777)SNP_34469 | 1577 | G | A | 21 | 8  | --        | -- |
|            | Ca(ICC2/PI489777)SNP_34470 | 1643 | G | C | 18 | 4  | --        | -- |
|            | Ca(ICC2/PI489777)SNP_34471 | 1798 | T | C | 15 | 8  | --        | -- |
| CakTC42547 | Ca(ICC2/PI489777)SNP_34472 | 722  | T | G | 3  | 4  | --        | -- |
| CakTC14854 | Ca(ICC2/PI489777)SNP_34473 | 475  | A | T | 3  | 3  | --        | -- |
| CakTC11464 | Ca(ICC2/PI489777)SNP_34474 | 1204 | G | A | 8  | 4  | --        | -- |
|            | Ca(ICC2/PI489777)SNP_34475 | 1214 | G | C | 6  | 4  | --        | -- |
|            | Ca(ICC2/PI489777)SNP_34476 | 1216 | A | G | 8  | 4  | --        | -- |
|            | Ca(ICC2/PI489777)SNP_34477 | 1234 | C | G | 10 | 4  | --        | -- |
| CakTC26608 | Ca(ICC2/PI489777)SNP_34478 | 1646 | A | G | 6  | 4  | --        | -- |
| CakTC37380 | Ca(ICC2/PI489777)SNP_34479 | 315  | A | G | 8  | 9  | --        | -- |

|            |                            |      |   |   |    |    |        |         |
|------------|----------------------------|------|---|---|----|----|--------|---------|
| CakTC26441 | Ca(ICC2/PI489777)SNP_34480 | 343  | A | G | 14 | 4  | --     | --      |
|            | Ca(ICC2/PI489777)SNP_34481 | 354  | A | T | 13 | 4  | --     | --      |
|            | Ca(ICC2/PI489777)SNP_34482 | 418  | A | T | 21 | 4  | --     | --      |
| CakTC28175 | Ca(ICC2/PI489777)SNP_34483 | 1030 | C | G | 9  | 5  | --     | --      |
|            | Ca(ICC2/PI489777)SNP_34484 | 1845 | T | C | 4  | 7  | --     | --      |
| CakTC10936 | Ca(ICC2/PI489777)SNP_34485 | 1082 | A | T | 3  | 4  | --     | --      |
| CakTC26826 | Ca(ICC2/PI489777)SNP_34486 | 1259 | C | A | 4  | 3  | --     | --      |
|            | Ca(ICC2/PI489777)SNP_34487 | 1369 | T | A | 4  | 4  | --     | --      |
| CakTC40148 | Ca(ICC2/PI489777)SNP_34488 | 467  | C | T | 4  | 11 | --     | --      |
|            | Ca(ICC2/PI489777)SNP_34489 | 514  | C | T | 3  | 7  | --     | --      |
| CakTC27289 | Ca(ICC2/PI489777)SNP_34490 | 346  | T | G | 15 | 10 | --     | --      |
|            | Ca(ICC2/PI489777)SNP_34491 | 1080 | G | A | 16 | 11 | --     | --      |
|            | Ca(ICC2/PI489777)SNP_34492 | 1572 | A | G | 6  | 7  | --     | --      |
|            | Ca(ICC2/PI489777)SNP_34493 | 1674 | C | T | 10 | 8  | --     | --      |
|            | Ca(ICC2/PI489777)SNP_34494 | 1758 | C | G | 12 | 10 | --     | --      |
|            | Ca(ICC2/PI489777)SNP_34495 | 2292 | T | C | 7  | 4  | --     | --      |
|            | Ca(ICC2/PI489777)SNP_34496 | 2352 | G | A | 7  | 5  | --     | --      |
| CakTC25980 | Ca(ICC2/PI489777)SNP_34497 | 913  | C | T | 10 | 4  | --     | --      |
|            | Ca(ICC2/PI489777)SNP_34498 | 1009 | G | A | 10 | 4  | --     | --      |
| CakTC33409 | Ca(ICC2/PI489777)SNP_34499 | 81   | T | C | 52 | 25 | --     | --      |
| CakTC13079 | Ca(ICC2/PI489777)SNP_34500 | 84   | T | C | 8  | 3  | --     | --      |
|            | Ca(ICC2/PI489777)SNP_34501 | 135  | C | T | 54 | 16 | --     | --      |
| CakTC40001 | Ca(ICC2/PI489777)SNP_34502 | 280  | G | C | 17 | 14 | --     | --      |
|            | Ca(ICC2/PI489777)SNP_34503 | 374  | A | G | 15 | 11 | --     | --      |
|            | Ca(ICC2/PI489777)SNP_34504 | 574  | G | T | 16 | 7  | --     | --      |
|            | Ca(ICC2/PI489777)SNP_34505 | 776  | A | G | 25 | 14 | --     | --      |
|            | Ca(ICC2/PI489777)SNP_34506 | 790  | C | T | 27 | 15 | --     | --      |
|            | Ca(ICC2/PI489777)SNP_34507 | 829  | G | A | 27 | 16 | --     | --      |
|            | Ca(ICC2/PI489777)SNP_34508 | 979  | C | T | 33 | 18 | --     | --      |
|            | Ca(ICC2/PI489777)SNP_34509 | 1045 | T | C | 33 | 20 | --     | --      |
|            | Ca(ICC2/PI489777)SNP_34510 | 1072 | C | T | 29 | 20 | --     | --      |
|            | Ca(ICC2/PI489777)SNP_34511 | 1144 | T | C | 29 | 23 | --     | --      |
|            | Ca(ICC2/PI489777)SNP_34512 | 1228 | T | G | 22 | 15 | --     | --      |
|            | Ca(ICC2/PI489777)SNP_34513 | 1260 | A | G | 25 | 16 | --     | --      |
|            | Ca(ICC2/PI489777)SNP_34514 | 1270 | T | C | 24 | 14 | --     | --      |
|            | Ca(ICC2/PI489777)SNP_34515 | 1280 | G | A | 11 | 14 | --     | --      |
|            | Ca(ICC2/PI489777)SNP_34516 | 1287 | C | T | 19 | 15 | --     | --      |
|            | Ca(ICC2/PI489777)SNP_34517 | 1317 | A | C | 19 | 17 | --     | --      |
|            | Ca(ICC2/PI489777)SNP_34518 | 1327 | G | A | 14 | 17 | --     | --      |
| CakTC38936 | Ca(ICC2/PI489777)SNP_34519 | 316  | C | T | 14 | 4  | --     | --      |
|            | Ca(ICC2/PI489777)SNP_34520 | 829  | A | G | 16 | 15 | --     | --      |
|            | Ca(ICC2/PI489777)SNP_34521 | 936  | G | A | 28 | 4  | --     | --      |
|            | Ca(ICC2/PI489777)SNP_34522 | 1243 | T | A | 29 | 6  | --     | --      |
|            | Ca(ICC2/PI489777)SNP_34523 | 1245 | T | G | 28 | 7  | --     | --      |
|            | Ca(ICC2/PI489777)SNP_34524 | 1292 | G | A | 24 | 4  | --     | --      |
| CakTC42981 | Ca(ICC2/PI489777)SNP_34525 | 219  | C | A | 13 | 3  | --     | --      |
|            | Ca(ICC2/PI489777)SNP_34526 | 384  | G | A | 14 | 3  | --     | --      |
|            | Ca(ICC2/PI489777)SNP_34527 | 414  | A | G | 12 | 3  | --     | --      |
|            | Ca(ICC2/PI489777)SNP_34528 | 1210 | G | T | 10 | 8  | --     | --      |
| CakTC04485 | Ca(ICC2/PI489777)SNP_34529 | 90   | G | A | 4  | 3  | --     | --      |
| CakTC01852 | Ca(ICC2/PI489777)SNP_34530 | 176  | C | T | 5  | 3  | --     | --      |
| CakTC06187 | Ca(ICC2/PI489777)SNP_34531 | 630  | A | G | 3  | 5  | --     | ABI3VP1 |
|            | Ca(ICC2/PI489777)SNP_34532 | 732  | A | G | 4  | 4  | --     | ABI3VP1 |
|            | Ca(ICC2/PI489777)SNP_34533 | 816  | T | A | 3  | 6  | --     | ABI3VP1 |
|            | Ca(ICC2/PI489777)SNP_34534 | 1482 | A | G | 5  | 3  | --     | ABI3VP1 |
| CakTC41618 | Ca(ICC2/PI489777)SNP_34535 | 1122 | T | A | 30 | 23 | --     | --      |
|            | Ca(ICC2/PI489777)SNP_34536 | 1317 | C | T | 16 | 12 | --     | --      |
|            | Ca(ICC2/PI489777)SNP_34537 | 1455 | T | C | 27 | 16 | --     | --      |
|            | Ca(ICC2/PI489777)SNP_34538 | 1467 | G | A | 29 | 13 | --     | --      |
|            | Ca(ICC2/PI489777)SNP_34539 | 1519 | G | A | 35 | 18 | --     | --      |
|            | Ca(ICC2/PI489777)SNP_34540 | 2036 | C | T | 19 | 3  | --     | --      |
|            | Ca(ICC2/PI489777)SNP_34541 | 2062 | T | C | 20 | 6  | --     | --      |
| CakTC42103 | Ca(ICC2/PI489777)SNP_34542 | 289  | T | A | 15 | 4  | --     | --      |
|            | Ca(ICC2/PI489777)SNP_34543 | 642  | T | C | 15 | 5  | --     | --      |
| CakTC10404 | Ca(ICC2/PI489777)SNP_34544 | 534  | T | A | 5  | 3  | Flower | bud     |
| CakTC01315 | Ca(ICC2/PI489777)SNP_34545 | 190  | T | C | 12 | 4  | --     | CCAAT   |
|            | Ca(ICC2/PI489777)SNP_34546 | 191  | T | C | 12 | 4  | --     | CCAAT   |
|            | Ca(ICC2/PI489777)SNP_34547 | 321  | A | G | 26 | 6  | --     | CCAAT   |
|            | Ca(ICC2/PI489777)SNP_34548 | 768  | C | T | 18 | 8  | --     | CCAAT   |
| CakTC22382 | Ca(ICC2/PI489777)SNP_34549 | 897  | C | T | 3  | 3  | --     | --      |
| CakTC33421 | Ca(ICC2/PI489777)SNP_34550 | 669  | G | A | 10 | 10 | --     | --      |
|            | Ca(ICC2/PI489777)SNP_34551 | 671  | T | C | 9  | 11 | --     | --      |
|            | Ca(ICC2/PI489777)SNP_34552 | 743  | T | C | 17 | 11 | --     | --      |
|            | Ca(ICC2/PI489777)SNP_34553 | 1683 | G | C | 10 | 13 | --     | --      |

|            |                            |      |   |   |     |    |        |     |
|------------|----------------------------|------|---|---|-----|----|--------|-----|
|            | Ca(ICC2/PI489777)SNP_34554 | 1690 | T | A | 11  | 13 | --     | --  |
| CakTC09516 | Ca(ICC2/PI489777)SNP_34555 | 1418 | G | C | 4   | 3  | --     | SBP |
|            | Ca(ICC2/PI489777)SNP_34556 | 2296 | C | T | 10  | 3  | --     | SBP |
|            | Ca(ICC2/PI489777)SNP_34557 | 2313 | T | C | 9   | 3  | --     | SBP |
| CakTC26134 | Ca(ICC2/PI489777)SNP_34558 | 474  | G | C | 123 | 43 | --     | --  |
|            | Ca(ICC2/PI489777)SNP_34559 | 593  | A | C | 127 | 53 | --     | --  |
|            | Ca(ICC2/PI489777)SNP_34560 | 726  | G | T | 138 | 43 | --     | --  |
|            | Ca(ICC2/PI489777)SNP_34561 | 762  | G | T | 110 | 52 | --     | --  |
|            | Ca(ICC2/PI489777)SNP_34562 | 1164 | A | T | 13  | 9  | --     | --  |
| CakTC32457 | Ca(ICC2/PI489777)SNP_34563 | 360  | G | A | 5   | 3  | --     | --  |
| CakTC37153 | Ca(ICC2/PI489777)SNP_34564 | 407  | T | A | 11  | 6  | --     | --  |
|            | Ca(ICC2/PI489777)SNP_34565 | 464  | C | T | 9   | 8  | --     | --  |
|            | Ca(ICC2/PI489777)SNP_34566 | 894  | C | T | 8   | 3  | --     | --  |
| CakTC42474 | Ca(ICC2/PI489777)SNP_34567 | 75   | G | C | 40  | 15 | --     | --  |
|            | Ca(ICC2/PI489777)SNP_34568 | 147  | T | A | 70  | 28 | --     | --  |
| CakTC08766 | Ca(ICC2/PI489777)SNP_34569 | 836  | G | A | 30  | 9  | --     | --  |
|            | Ca(ICC2/PI489777)SNP_34570 | 1042 | T | C | 13  | 8  | --     | --  |
|            | Ca(ICC2/PI489777)SNP_34571 | 1070 | G | A | 13  | 8  | --     | --  |
|            | Ca(ICC2/PI489777)SNP_34572 | 1257 | G | A | 6   | 4  | --     | --  |
| CakTC35950 | Ca(ICC2/PI489777)SNP_34573 | 548  | C | G | 3   | 8  | --     | --  |
|            | Ca(ICC2/PI489777)SNP_34574 | 1449 | G | A | 4   | 4  | --     | --  |
|            | Ca(ICC2/PI489777)SNP_34575 | 2585 | G | A | 16  | 4  | --     | --  |
|            | Ca(ICC2/PI489777)SNP_34576 | 2852 | A | G | 7   | 3  | --     | --  |
| CakTC38716 | Ca(ICC2/PI489777)SNP_34577 | 1175 | C | T | 8   | 6  | --     | --  |
|            | Ca(ICC2/PI489777)SNP_34578 | 1295 | C | T | 3   | 3  | --     | --  |
| CakTC38785 | Ca(ICC2/PI489777)SNP_34579 | 380  | C | T | 7   | 3  | --     | --  |
|            | Ca(ICC2/PI489777)SNP_34580 | 632  | T | C | 11  | 3  | --     | --  |
|            | Ca(ICC2/PI489777)SNP_34581 | 761  | T | A | 13  | 3  | --     | --  |
|            | Ca(ICC2/PI489777)SNP_34582 | 1262 | A | G | 9   | 4  | --     | --  |
|            | Ca(ICC2/PI489777)SNP_34583 | 1292 | G | T | 12  | 4  | --     | --  |
| CakTC11234 | Ca(ICC2/PI489777)SNP_34584 | 1010 | G | A | 8   | 5  | --     | --  |
|            | Ca(ICC2/PI489777)SNP_34585 | 2020 | C | T | 11  | 7  | --     | --  |
|            | Ca(ICC2/PI489777)SNP_34586 | 2300 | T | G | 5   | 3  | --     | --  |
| CakTC11426 | Ca(ICC2/PI489777)SNP_34587 | 775  | C | T | 21  | 22 | --     | --  |
| CakTC36454 | Ca(ICC2/PI489777)SNP_34588 | 472  | G | A | 3   | 3  | --     | --  |
| CakTC40188 | Ca(ICC2/PI489777)SNP_34589 | 229  | A | G | 4   | 3  | --     | --  |
| CakTC26167 | Ca(ICC2/PI489777)SNP_34590 | 663  | T | C | 15  | 14 | --     | --  |
|            | Ca(ICC2/PI489777)SNP_34591 | 699  | G | A | 20  | 13 | --     | --  |
|            | Ca(ICC2/PI489777)SNP_34592 | 771  | C | T | 21  | 7  | --     | --  |
|            | Ca(ICC2/PI489777)SNP_34593 | 980  | T | C | 12  | 7  | --     | --  |
|            | Ca(ICC2/PI489777)SNP_34594 | 1416 | C | G | 9   | 13 | --     | --  |
| CakTC29539 | Ca(ICC2/PI489777)SNP_34595 | 897  | G | C | 4   | 4  | Flower | bud |
|            | Ca(ICC2/PI489777)SNP_34596 | 964  | C | T | 6   | 4  | Flower | bud |
|            | Ca(ICC2/PI489777)SNP_34597 | 1227 | A | T | 7   | 4  | Flower | bud |
| CakTC23332 | Ca(ICC2/PI489777)SNP_34598 | 435  | G | A | 33  | 17 | --     | --  |
|            | Ca(ICC2/PI489777)SNP_34599 | 732  | T | G | 34  | 23 | --     | --  |
|            | Ca(ICC2/PI489777)SNP_34600 | 753  | G | T | 34  | 25 | --     | --  |
|            | Ca(ICC2/PI489777)SNP_34601 | 907  | A | T | 16  | 12 | --     | --  |
| CakTC37389 | Ca(ICC2/PI489777)SNP_34602 | 58   | C | G | 12  | 3  | --     | --  |
|            | Ca(ICC2/PI489777)SNP_34603 | 133  | A | G | 27  | 18 | --     | --  |
|            | Ca(ICC2/PI489777)SNP_34604 | 192  | A | C | 33  | 20 | --     | --  |
|            | Ca(ICC2/PI489777)SNP_34605 | 281  | C | T | 40  | 20 | --     | --  |
|            | Ca(ICC2/PI489777)SNP_34606 | 378  | C | T | 54  | 19 | --     | --  |
|            | Ca(ICC2/PI489777)SNP_34607 | 425  | T | C | 41  | 16 | --     | --  |
|            | Ca(ICC2/PI489777)SNP_34608 | 452  | T | A | 58  | 17 | --     | --  |
|            | Ca(ICC2/PI489777)SNP_34609 | 866  | T | C | 30  | 8  | --     | --  |
| CakTC03654 | Ca(ICC2/PI489777)SNP_34610 | 312  | G | A | 4   | 4  | --     | --  |
|            | Ca(ICC2/PI489777)SNP_34611 | 351  | C | A | 8   | 6  | --     | --  |
|            | Ca(ICC2/PI489777)SNP_34612 | 766  | A | C | 8   | 6  | --     | --  |
| CakTC40450 | Ca(ICC2/PI489777)SNP_34613 | 292  | G | T | 14  | 7  | --     | --  |
|            | Ca(ICC2/PI489777)SNP_34614 | 316  | C | A | 15  | 7  | --     | --  |
|            | Ca(ICC2/PI489777)SNP_34615 | 481  | C | A | 12  | 7  | --     | --  |
|            | Ca(ICC2/PI489777)SNP_34616 | 580  | C | T | 16  | 7  | --     | --  |
| CakTC41337 | Ca(ICC2/PI489777)SNP_34617 | 253  | T | A | 3   | 7  | --     | --  |
| CakTC24637 | Ca(ICC2/PI489777)SNP_34618 | 231  | C | G | 34  | 5  | --     | --  |
|            | Ca(ICC2/PI489777)SNP_34619 | 419  | C | G | 26  | 11 | --     | --  |
|            | Ca(ICC2/PI489777)SNP_34620 | 426  | A | G | 27  | 11 | --     | --  |
|            | Ca(ICC2/PI489777)SNP_34621 | 1071 | T | C | 28  | 15 | --     | --  |
|            | Ca(ICC2/PI489777)SNP_34622 | 1200 | C | G | 19  | 18 | --     | --  |
|            | Ca(ICC2/PI489777)SNP_34623 | 1408 | T | G | 19  | 21 | --     | --  |
|            | Ca(ICC2/PI489777)SNP_34624 | 2022 | A | T | 13  | 8  | --     | --  |
|            | Ca(ICC2/PI489777)SNP_34625 | 2095 | C | A | 15  | 7  | --     | --  |
| CakTC26331 | Ca(ICC2/PI489777)SNP_34626 | 231  | C | A | 5   | 3  | --     | --  |
| CakTC32615 | Ca(ICC2/PI489777)SNP_34627 | 290  | T | C | 10  | 8  | --     | --  |

|            |                             |      |   |   |     |     |       |           |
|------------|-----------------------------|------|---|---|-----|-----|-------|-----------|
| CakTC40436 | Ca(ICCV2/PI489777)SNP_34628 | 176  | C | A | 28  | 16  | --    | --        |
|            | Ca(ICCV2/PI489777)SNP_34629 | 682  | A | G | 16  | 14  | --    | --        |
| CakTC07899 | Ca(ICCV2/PI489777)SNP_34630 | 254  | A | G | 11  | 3   | --    | --        |
| CakTC26810 | Ca(ICCV2/PI489777)SNP_34631 | 814  | G | A | 13  | 4   | --    | --        |
|            | Ca(ICCV2/PI489777)SNP_34632 | 1417 | T | C | 12  | 6   | --    | --        |
|            | Ca(ICCV2/PI489777)SNP_34633 | 1520 | A | G | 14  | 6   | --    | --        |
|            | Ca(ICCV2/PI489777)SNP_34634 | 1876 | T | G | 16  | 3   | --    | --        |
|            | Ca(ICCV2/PI489777)SNP_34635 | 2121 | A | T | 20  | 4   | --    | --        |
| CakTC39584 | Ca(ICCV2/PI489777)SNP_34636 | 426  | A | G | 5   | 5   | --    | C2C2-GATA |
|            | Ca(ICCV2/PI489777)SNP_34637 | 501  | C | T | 9   | 6   | --    | C2C2-GATA |
| CakTC42287 | Ca(ICCV2/PI489777)SNP_34638 | 481  | T | C | 10  | 6   | --    | --        |
|            | Ca(ICCV2/PI489777)SNP_34639 | 976  | T | C | 12  | 3   | --    | --        |
|            | Ca(ICCV2/PI489777)SNP_34640 | 1463 | T | C | 10  | 12  | --    | --        |
| CakTC42579 | Ca(ICCV2/PI489777)SNP_34641 | 153  | G | A | 25  | 9   | --    | --        |
| CakTC22836 | Ca(ICCV2/PI489777)SNP_34642 | 186  | T | C | 13  | 3   | --    | --        |
|            | Ca(ICCV2/PI489777)SNP_34643 | 227  | A | T | 13  | 3   | --    | --        |
|            | Ca(ICCV2/PI489777)SNP_34644 | 315  | G | T | 10  | 3   | --    | --        |
|            | Ca(ICCV2/PI489777)SNP_34645 | 351  | A | G | 12  | 4   | --    | --        |
|            | Ca(ICCV2/PI489777)SNP_34646 | 819  | T | C | 15  | 7   | --    | --        |
| CakTC24489 | Ca(ICCV2/PI489777)SNP_34647 | 1510 | C | G | 39  | 14  | --    | --        |
|            | Ca(ICCV2/PI489777)SNP_34648 | 1665 | G | A | 20  | 8   | --    | --        |
| CakTC29076 | Ca(ICCV2/PI489777)SNP_34649 | 447  | A | G | 4   | 3   | --    | --        |
|            | Ca(ICCV2/PI489777)SNP_34650 | 1027 | A | G | 3   | 3   | --    | --        |
| CakTC26418 | Ca(ICCV2/PI489777)SNP_34651 | 303  | A | G | 12  | 8   | --    | --        |
|            | Ca(ICCV2/PI489777)SNP_34652 | 1278 | A | G | 138 | 106 | --    | --        |
|            | Ca(ICCV2/PI489777)SNP_34653 | 2217 | T | G | 60  | 54  | --    | --        |
| CakTC42674 | Ca(ICCV2/PI489777)SNP_34654 | 321  | C | G | 9   | 5   | --    | --        |
| CakTC40294 | Ca(ICCV2/PI489777)SNP_34655 | 93   | T | C | 6   | 6   | --    | --        |
|            | Ca(ICCV2/PI489777)SNP_34656 | 191  | G | C | 6   | 7   | --    | --        |
|            | Ca(ICCV2/PI489777)SNP_34657 | 442  | C | T | 11  | 12  | --    | --        |
|            | Ca(ICCV2/PI489777)SNP_34658 | 1155 | C | A | 14  | 9   | --    | --        |
|            | Ca(ICCV2/PI489777)SNP_34659 | 1158 | C | G | 15  | 11  | --    | --        |
| CakTC25667 | Ca(ICCV2/PI489777)SNP_34660 | 207  | C | T | 16  | 5   | --    | --        |
|            | Ca(ICCV2/PI489777)SNP_34661 | 421  | A | C | 21  | 8   | --    | --        |
| CakTC38754 | Ca(ICCV2/PI489777)SNP_34662 | 366  | C | G | 8   | 6   | --    | --        |
|            | Ca(ICCV2/PI489777)SNP_34663 | 647  | C | A | 3   | 8   | --    | --        |
|            | Ca(ICCV2/PI489777)SNP_34664 | 829  | A | G | 6   | 5   | --    | --        |
| CakTC16250 | Ca(ICCV2/PI489777)SNP_34665 | 259  | T | A | 5   | 6   | --    | --        |
|            | Ca(ICCV2/PI489777)SNP_34666 | 298  | T | C | 4   | 8   | --    | --        |
|            | Ca(ICCV2/PI489777)SNP_34667 | 2318 | G | A | 8   | 5   | --    | --        |
| CakTC33675 | Ca(ICCV2/PI489777)SNP_34668 | 85   | A | G | 4   | 3   | --    | --        |
|            | Ca(ICCV2/PI489777)SNP_34669 | 110  | G | C | 4   | 4   | --    | --        |
|            | Ca(ICCV2/PI489777)SNP_34670 | 165  | A | T | 5   | 5   | --    | --        |
|            | Ca(ICCV2/PI489777)SNP_34671 | 420  | A | G | 4   | 7   | --    | --        |
| CakTC26080 | Ca(ICCV2/PI489777)SNP_34672 | 1293 | C | T | 4   | 3   | --    | --        |
| CakTC07308 | Ca(ICCV2/PI489777)SNP_34673 | 156  | C | T | 5   | 3   | --    | --        |
|            | Ca(ICCV2/PI489777)SNP_34674 | 345  | T | C | 4   | 3   | --    | --        |
|            | Ca(ICCV2/PI489777)SNP_34675 | 346  | G | A | 4   | 3   | --    | --        |
|            | Ca(ICCV2/PI489777)SNP_34676 | 361  | C | A | 5   | 3   | --    | --        |
|            | Ca(ICCV2/PI489777)SNP_34677 | 362  | A | G | 5   | 3   | --    | --        |
|            | Ca(ICCV2/PI489777)SNP_34678 | 413  | C | T | 5   | 3   | --    | --        |
| CakTC24030 | Ca(ICCV2/PI489777)SNP_34679 | 633  | G | C | 6   | 4   | Shoot | --        |
| CakTC28007 | Ca(ICCV2/PI489777)SNP_34680 | 357  | G | T | 8   | 5   | --    | --        |
|            | Ca(ICCV2/PI489777)SNP_34681 | 392  | A | T | 8   | 5   | --    | --        |
|            | Ca(ICCV2/PI489777)SNP_34682 | 795  | C | T | 6   | 3   | --    | --        |
|            | Ca(ICCV2/PI489777)SNP_34683 | 815  | G | C | 8   | 3   | --    | --        |
|            | Ca(ICCV2/PI489777)SNP_34684 | 1259 | C | T | 3   | 4   | --    | --        |
|            | Ca(ICCV2/PI489777)SNP_34685 | 1492 | C | T | 9   | 5   | --    | --        |
| CakTC41131 | Ca(ICCV2/PI489777)SNP_34686 | 315  | G | A | 13  | 3   | --    | --        |
| CakTC24618 | Ca(ICCV2/PI489777)SNP_34687 | 1020 | T | C | 7   | 4   | --    | --        |
|            | Ca(ICCV2/PI489777)SNP_34688 | 1446 | A | G | 9   | 3   | --    | --        |
|            | Ca(ICCV2/PI489777)SNP_34689 | 1725 | G | A | 16  | 3   | --    | --        |
|            | Ca(ICCV2/PI489777)SNP_34690 | 3606 | A | C | 8   | 4   | --    | --        |
|            | Ca(ICCV2/PI489777)SNP_34691 | 3874 | C | T | 4   | 4   | --    | --        |
|            | Ca(ICCV2/PI489777)SNP_34692 | 4119 | G | A | 6   | 5   | --    | --        |
| CakTC31464 | Ca(ICCV2/PI489777)SNP_34693 | 342  | T | C | 3   | 4   | --    | --        |
|            | Ca(ICCV2/PI489777)SNP_34694 | 372  | T | C | 4   | 4   | --    | --        |
|            | Ca(ICCV2/PI489777)SNP_34695 | 416  | G | C | 3   | 4   | --    | --        |
|            | Ca(ICCV2/PI489777)SNP_34696 | 703  | G | A | 7   | 7   | --    | --        |
| CakTC39230 | Ca(ICCV2/PI489777)SNP_34697 | 637  | C | T | 17  | 6   | --    | --        |
|            | Ca(ICCV2/PI489777)SNP_34698 | 787  | A | G | 15  | 4   | --    | --        |
|            | Ca(ICCV2/PI489777)SNP_34699 | 927  | G | A | 14  | 3   | --    | --        |
|            | Ca(ICCV2/PI489777)SNP_34700 | 1000 | T | C | 13  | 4   | --    | --        |
|            | Ca(ICCV2/PI489777)SNP_34701 | 1398 | A | G | 7   | 3   | --    | --        |

|            |                            |      |   |   |     |    |        |     |
|------------|----------------------------|------|---|---|-----|----|--------|-----|
| CakTC36975 | Ca(ICC2/PI489777)SNP_34702 | 346  | C | T | 6   | 6  | --     | --  |
| CakTC38701 | Ca(ICC2/PI489777)SNP_34703 | 450  | A | G | 7   | 13 | --     | --  |
|            | Ca(ICC2/PI489777)SNP_34704 | 585  | G | A | 4   | 14 | --     | --  |
|            | Ca(ICC2/PI489777)SNP_34705 | 660  | C | T | 3   | 9  | --     | --  |
|            | Ca(ICC2/PI489777)SNP_34706 | 927  | T | A | 5   | 4  | --     | --  |
|            | Ca(ICC2/PI489777)SNP_34707 | 1149 | A | G | 14  | 7  | --     | --  |
| CakTC39099 | Ca(ICC2/PI489777)SNP_34708 | 455  | C | T | 5   | 4  | --     | --  |
|            | Ca(ICC2/PI489777)SNP_34709 | 573  | T | C | 11  | 12 | --     | --  |
|            | Ca(ICC2/PI489777)SNP_34710 | 753  | G | A | 10  | 10 | --     | --  |
| CakTC39889 | Ca(ICC2/PI489777)SNP_34711 | 727  | C | T | 11  | 21 | --     | --  |
|            | Ca(ICC2/PI489777)SNP_34712 | 862  | C | T | 8   | 9  | --     | --  |
|            | Ca(ICC2/PI489777)SNP_34713 | 964  | C | T | 8   | 12 | --     | --  |
| CakTC41151 | Ca(ICC2/PI489777)SNP_34714 | 142  | C | G | 27  | 3  | --     | --  |
|            | Ca(ICC2/PI489777)SNP_34715 | 180  | C | A | 29  | 3  | --     | --  |
| CakTC24724 | Ca(ICC2/PI489777)SNP_34716 | 585  | A | G | 3   | 5  | --     | --  |
|            | Ca(ICC2/PI489777)SNP_34717 | 1230 | A | C | 44  | 21 | --     | --  |
|            | Ca(ICC2/PI489777)SNP_34718 | 1791 | G | A | 85  | 32 | --     | --  |
|            | Ca(ICC2/PI489777)SNP_34719 | 1868 | T | C | 75  | 21 | --     | --  |
| CakTC13731 | Ca(ICC2/PI489777)SNP_34720 | 1513 | T | C | 3   | 3  | --     | --  |
| CakTC39835 | Ca(ICC2/PI489777)SNP_34721 | 310  | C | T | 25  | 16 | --     | --  |
|            | Ca(ICC2/PI489777)SNP_34722 | 484  | C | G | 16  | 17 | --     | --  |
|            | Ca(ICC2/PI489777)SNP_34723 | 498  | A | T | 18  | 18 | --     | --  |
|            | Ca(ICC2/PI489777)SNP_34724 | 580  | A | G | 13  | 15 | --     | --  |
|            | Ca(ICC2/PI489777)SNP_34725 | 705  | A | G | 13  | 17 | --     | --  |
|            | Ca(ICC2/PI489777)SNP_34726 | 1019 | C | T | 12  | 9  | --     | --  |
| CakTC17534 | Ca(ICC2/PI489777)SNP_34727 | 5649 | A | G | 13  | 3  | Flower | bud |
|            | Ca(ICC2/PI489777)SNP_34728 | 5652 | G | A | 13  | 3  | Flower | bud |
| CakTC34424 | Ca(ICC2/PI489777)SNP_34729 | 29   | G | C | 10  | 4  | --     | --  |
| CakTC43177 | Ca(ICC2/PI489777)SNP_34730 | 1080 | G | A | 20  | 9  | --     | --  |
| CakTC33401 | Ca(ICC2/PI489777)SNP_34731 | 162  | T | A | 9   | 3  | --     | --  |
|            | Ca(ICC2/PI489777)SNP_34732 | 534  | A | G | 11  | 4  | --     | --  |
|            | Ca(ICC2/PI489777)SNP_34733 | 579  | T | C | 12  | 5  | --     | --  |
|            | Ca(ICC2/PI489777)SNP_34734 | 1467 | T | C | 20  | 5  | --     | --  |
| CakTC26196 | Ca(ICC2/PI489777)SNP_34735 | 1225 | G | T | 5   | 3  | Flower | bud |
| CakTC39038 | Ca(ICC2/PI489777)SNP_34736 | 428  | C | T | 9   | 4  | --     | --  |
|            | Ca(ICC2/PI489777)SNP_34737 | 676  | G | A | 4   | 4  | --     | --  |
|            | Ca(ICC2/PI489777)SNP_34738 | 687  | A | G | 3   | 5  | --     | --  |
|            | Ca(ICC2/PI489777)SNP_34739 | 984  | A | G | 3   | 6  | --     | --  |
|            | Ca(ICC2/PI489777)SNP_34740 | 1125 | A | C | 6   | 7  | --     | --  |
| CakTC25130 | Ca(ICC2/PI489777)SNP_34741 | 327  | T | C | 42  | 13 | --     | --  |
|            | Ca(ICC2/PI489777)SNP_34742 | 403  | C | T | 48  | 14 | --     | --  |
|            | Ca(ICC2/PI489777)SNP_34743 | 578  | A | G | 45  | 8  | --     | --  |
|            | Ca(ICC2/PI489777)SNP_34744 | 594  | G | C | 46  | 7  | --     | --  |
|            | Ca(ICC2/PI489777)SNP_34745 | 783  | G | A | 31  | 4  | --     | --  |
|            | Ca(ICC2/PI489777)SNP_34746 | 795  | G | A | 32  | 4  | --     | --  |
|            | Ca(ICC2/PI489777)SNP_34747 | 1238 | C | G | 40  | 11 | --     | --  |
|            | Ca(ICC2/PI489777)SNP_34748 | 1405 | G | C | 35  | 12 | --     | --  |
|            | Ca(ICC2/PI489777)SNP_34749 | 1530 | A | G | 26  | 7  | --     | --  |
| CakTC11687 | Ca(ICC2/PI489777)SNP_34750 | 821  | A | G | 49  | 22 | --     | --  |
|            | Ca(ICC2/PI489777)SNP_34751 | 850  | T | C | 45  | 17 | --     | --  |
| CakTC24798 | Ca(ICC2/PI489777)SNP_34752 | 274  | C | A | 3   | 5  | --     | --  |
|            | Ca(ICC2/PI489777)SNP_34753 | 276  | G | T | 3   | 5  | --     | --  |
|            | Ca(ICC2/PI489777)SNP_34754 | 299  | C | T | 3   | 5  | --     | --  |
| CakTC41566 | Ca(ICC2/PI489777)SNP_34755 | 368  | G | A | 5   | 4  | --     | --  |
|            | Ca(ICC2/PI489777)SNP_34756 | 437  | G | A | 5   | 3  | --     | --  |
|            | Ca(ICC2/PI489777)SNP_34757 | 1720 | A | C | 7   | 8  | --     | --  |
| CakTC36464 | Ca(ICC2/PI489777)SNP_34758 | 177  | G | C | 12  | 5  | --     | --  |
|            | Ca(ICC2/PI489777)SNP_34759 | 229  | A | G | 10  | 4  | --     | --  |
|            | Ca(ICC2/PI489777)SNP_34760 | 1205 | C | T | 18  | 6  | --     | --  |
|            | Ca(ICC2/PI489777)SNP_34761 | 2501 | A | T | 4   | 6  | --     | --  |
|            | Ca(ICC2/PI489777)SNP_34762 | 2908 | A | G | 8   | 4  | --     | --  |
| CakTC25904 | Ca(ICC2/PI489777)SNP_34763 | 1278 | G | C | 103 | 25 | --     | --  |
|            | Ca(ICC2/PI489777)SNP_34764 | 1302 | C | T | 93  | 23 | --     | --  |
| CakTC41673 | Ca(ICC2/PI489777)SNP_34765 | 1027 | A | T | 10  | 9  | --     | --  |
|            | Ca(ICC2/PI489777)SNP_34766 | 1370 | T | A | 8   | 4  | --     | --  |
|            | Ca(ICC2/PI489777)SNP_34767 | 2149 | G | A | 5   | 5  | --     | --  |
| CakTC31893 | Ca(ICC2/PI489777)SNP_34768 | 43   | G | C | 15  | 5  | --     | --  |
|            | Ca(ICC2/PI489777)SNP_34769 | 57   | G | T | 16  | 5  | --     | --  |
|            | Ca(ICC2/PI489777)SNP_34770 | 128  | G | T | 19  | 14 | --     | --  |
|            | Ca(ICC2/PI489777)SNP_34771 | 144  | A | C | 19  | 14 | --     | --  |
|            | Ca(ICC2/PI489777)SNP_34772 | 271  | A | G | 23  | 30 | --     | --  |
|            | Ca(ICC2/PI489777)SNP_34773 | 417  | C | T | 25  | 31 | --     | --  |
|            | Ca(ICC2/PI489777)SNP_34774 | 418  | C | A | 25  | 26 | --     | --  |
|            | Ca(ICC2/PI489777)SNP_34775 | 471  | C | T | 26  | 29 | --     | --  |

|            |                            |      |   |   |    |    |    |      |
|------------|----------------------------|------|---|---|----|----|----|------|
|            | Ca(ICC2/PI489777)SNP_34776 | 486  | T | G | 29 | 32 | -- | --   |
|            | Ca(ICC2/PI489777)SNP_34777 | 492  | C | T | 29 | 31 | -- | --   |
|            | Ca(ICC2/PI489777)SNP_34778 | 522  | G | T | 27 | 28 | -- | --   |
|            | Ca(ICC2/PI489777)SNP_34779 | 1113 | T | C | 15 | 16 | -- | --   |
|            | Ca(ICC2/PI489777)SNP_34780 | 1167 | C | T | 14 | 14 | -- | --   |
|            | Ca(ICC2/PI489777)SNP_34781 | 1262 | T | G | 13 | 8  | -- | --   |
| CakTC22813 | Ca(ICC2/PI489777)SNP_34782 | 200  | A | G | 5  | 6  | -- | --   |
|            | Ca(ICC2/PI489777)SNP_34783 | 523  | C | T | 8  | 4  | -- | --   |
|            | Ca(ICC2/PI489777)SNP_34784 | 579  | G | A | 6  | 4  | -- | --   |
| CakTC41485 | Ca(ICC2/PI489777)SNP_34785 | 1658 | A | G | 15 | 6  | -- | --   |
|            | Ca(ICC2/PI489777)SNP_34786 | 1906 | A | G | 17 | 7  | -- | --   |
| CakTC08732 | Ca(ICC2/PI489777)SNP_34787 | 1670 | T | C | 4  | 3  | -- | --   |
|            | Ca(ICC2/PI489777)SNP_34788 | 1674 | A | G | 5  | 3  | -- | --   |
| CakTC29412 | Ca(ICC2/PI489777)SNP_34789 | 331  | A | T | 7  | 11 | -- | --   |
|            | Ca(ICC2/PI489777)SNP_34790 | 497  | G | A | 41 | 22 | -- | --   |
|            | Ca(ICC2/PI489777)SNP_34791 | 773  | G | A | 42 | 11 | -- | --   |
| CakTC26847 | Ca(ICC2/PI489777)SNP_34792 | 648  | T | C | 4  | 5  | -- | --   |
|            | Ca(ICC2/PI489777)SNP_34793 | 676  | C | T | 4  | 4  | -- | --   |
| CakTC12071 | Ca(ICC2/PI489777)SNP_34794 | 849  | G | A | 4  | 3  | -- | --   |
| CakTC42323 | Ca(ICC2/PI489777)SNP_34795 | 77   | C | T | 42 | 15 | -- | --   |
|            | Ca(ICC2/PI489777)SNP_34796 | 681  | A | T | 3  | 6  | -- | --   |
| CakTC37954 | Ca(ICC2/PI489777)SNP_34797 | 456  | C | T | 13 | 5  | -- | --   |
|            | Ca(ICC2/PI489777)SNP_34798 | 779  | A | G | 4  | 3  | -- | --   |
| CakTC32834 | Ca(ICC2/PI489777)SNP_34799 | 1908 | A | G | 8  | 5  | -- | --   |
|            | Ca(ICC2/PI489777)SNP_34800 | 2249 | A | G | 20 | 6  | -- | --   |
| CakTC32784 | Ca(ICC2/PI489777)SNP_34801 | 876  | C | T | 4  | 3  | -- | ARF  |
|            | Ca(ICC2/PI489777)SNP_34802 | 1629 | G | C | 7  | 4  | -- | ARF  |
|            | Ca(ICC2/PI489777)SNP_34803 | 1862 | G | C | 6  | 5  | -- | ARF  |
|            | Ca(ICC2/PI489777)SNP_34804 | 2397 | C | T | 7  | 4  | -- | ARF  |
| CakTC28276 | Ca(ICC2/PI489777)SNP_34805 | 164  | G | A | 6  | 3  | -- | GRAS |
|            | Ca(ICC2/PI489777)SNP_34806 | 558  | C | A | 37 | 21 | -- | GRAS |
|            | Ca(ICC2/PI489777)SNP_34807 | 1303 | A | C | 29 | 8  | -- | GRAS |
|            | Ca(ICC2/PI489777)SNP_34808 | 1905 | A | T | 47 | 11 | -- | GRAS |
|            | Ca(ICC2/PI489777)SNP_34809 | 1917 | A | G | 44 | 8  | -- | GRAS |
| CakTC38058 | Ca(ICC2/PI489777)SNP_34810 | 774  | C | T | 20 | 12 | -- | --   |
|            | Ca(ICC2/PI489777)SNP_34811 | 899  | A | T | 12 | 8  | -- | --   |
| CakTC31838 | Ca(ICC2/PI489777)SNP_34812 | 159  | C | T | 4  | 4  | -- | --   |
|            | Ca(ICC2/PI489777)SNP_34813 | 247  | G | C | 7  | 9  | -- | --   |
|            | Ca(ICC2/PI489777)SNP_34814 | 1552 | G | A | 7  | 9  | -- | --   |
|            | Ca(ICC2/PI489777)SNP_34815 | 1633 | G | A | 9  | 9  | -- | --   |
|            | Ca(ICC2/PI489777)SNP_34816 | 1780 | T | C | 8  | 5  | -- | --   |
|            | Ca(ICC2/PI489777)SNP_34817 | 2113 | C | T | 7  | 3  | -- | --   |
|            | Ca(ICC2/PI489777)SNP_34818 | 2188 | C | A | 6  | 3  | -- | --   |
|            | Ca(ICC2/PI489777)SNP_34819 | 4180 | A | G | 7  | 6  | -- | --   |
|            | Ca(ICC2/PI489777)SNP_34820 | 4827 | T | C | 11 | 7  | -- | --   |
|            | Ca(ICC2/PI489777)SNP_34821 | 5043 | G | A | 10 | 6  | -- | --   |
|            | Ca(ICC2/PI489777)SNP_34822 | 5172 | T | C | 5  | 3  | -- | --   |
| CakTC37042 | Ca(ICC2/PI489777)SNP_34823 | 351  | A | G | 8  | 3  | -- | --   |
|            | Ca(ICC2/PI489777)SNP_34824 | 582  | A | G | 13 | 11 | -- | --   |
|            | Ca(ICC2/PI489777)SNP_34825 | 630  | T | C | 15 | 12 | -- | --   |
|            | Ca(ICC2/PI489777)SNP_34826 | 828  | C | T | 12 | 15 | -- | --   |
|            | Ca(ICC2/PI489777)SNP_34827 | 1093 | T | A | 11 | 4  | -- | --   |
|            | Ca(ICC2/PI489777)SNP_34828 | 1094 | G | C | 12 | 4  | -- | --   |
|            | Ca(ICC2/PI489777)SNP_34829 | 1146 | A | T | 11 | 8  | -- | --   |
|            | Ca(ICC2/PI489777)SNP_34830 | 1381 | G | C | 29 | 8  | -- | --   |
|            | Ca(ICC2/PI489777)SNP_34831 | 1515 | T | C | 11 | 5  | -- | --   |
|            | Ca(ICC2/PI489777)SNP_34832 | 1871 | A | G | 18 | 12 | -- | --   |
|            | Ca(ICC2/PI489777)SNP_34833 | 1886 | A | G | 20 | 12 | -- | --   |
|            | Ca(ICC2/PI489777)SNP_34834 | 1923 | T | C | 11 | 13 | -- | --   |
|            | Ca(ICC2/PI489777)SNP_34835 | 1928 | T | G | 14 | 13 | -- | --   |
|            | Ca(ICC2/PI489777)SNP_34836 | 1964 | T | G | 13 | 13 | -- | --   |
|            | Ca(ICC2/PI489777)SNP_34837 | 2013 | A | G | 13 | 13 | -- | --   |
|            | Ca(ICC2/PI489777)SNP_34838 | 2066 | T | C | 7  | 10 | -- | --   |
|            | Ca(ICC2/PI489777)SNP_34839 | 2139 | G | A | 6  | 10 | -- | --   |
|            | Ca(ICC2/PI489777)SNP_34840 | 2229 | A | G | 4  | 10 | -- | --   |
|            | Ca(ICC2/PI489777)SNP_34841 | 2231 | T | C | 3  | 10 | -- | --   |
|            | Ca(ICC2/PI489777)SNP_34842 | 2454 | C | A | 7  | 14 | -- | --   |
| CakTC31595 | Ca(ICC2/PI489777)SNP_34843 | 1137 | T | C | 5  | 3  | -- | --   |
|            | Ca(ICC2/PI489777)SNP_34844 | 1140 | G | C | 5  | 3  | -- | --   |
|            | Ca(ICC2/PI489777)SNP_34845 | 1373 | C | T | 8  | 4  | -- | --   |
|            | Ca(ICC2/PI489777)SNP_34846 | 1644 | C | T | 7  | 3  | -- | --   |
|            | Ca(ICC2/PI489777)SNP_34847 | 2167 | G | A | 11 | 3  | -- | --   |
| CakTC26399 | Ca(ICC2/PI489777)SNP_34848 | 847  | T | C | 96 | 48 | -- | --   |
|            | Ca(ICC2/PI489777)SNP_34849 | 848  | G | A | 96 | 48 | -- | --   |

|            |                            |      |   |   |     |    |    |     |
|------------|----------------------------|------|---|---|-----|----|----|-----|
| CakTC35672 | Ca(ICC2/PI489777)SNP_34850 | 1622 | C | T | 16  | 4  | -- | --  |
|            | Ca(ICC2/PI489777)SNP_34851 | 2243 | G | A | 5   | 13 | -- | --  |
|            | Ca(ICC2/PI489777)SNP_34852 | 2523 | T | C | 8   | 11 | -- | --  |
|            | Ca(ICC2/PI489777)SNP_34853 | 2524 | T | C | 9   | 11 | -- | --  |
|            | Ca(ICC2/PI489777)SNP_34854 | 2646 | T | C | 16  | 14 | -- | --  |
|            | Ca(ICC2/PI489777)SNP_34855 | 2823 | G | A | 17  | 13 | -- | --  |
|            | Ca(ICC2/PI489777)SNP_34856 | 2838 | A | G | 15  | 8  | -- | --  |
|            | Ca(ICC2/PI489777)SNP_34857 | 2861 | G | A | 13  | 12 | -- | --  |
| CakTC40440 | Ca(ICC2/PI489777)SNP_34858 | 215  | A | C | 5   | 8  | -- | --  |
|            | Ca(ICC2/PI489777)SNP_34859 | 779  | C | A | 3   | 6  | -- | --  |
| CakTC38469 | Ca(ICC2/PI489777)SNP_34860 | 347  | A | T | 3   | 3  | -- | --  |
| CakTC13072 | Ca(ICC2/PI489777)SNP_34861 | 104  | A | G | 3   | 5  | -- | --  |
| CakTC34002 | Ca(ICC2/PI489777)SNP_34862 | 600  | A | G | 4   | 3  | -- | LOB |
|            | Ca(ICC2/PI489777)SNP_34863 | 620  | T | A | 5   | 3  | -- | LOB |
| CakTC30884 | Ca(ICC2/PI489777)SNP_34864 | 58   | C | G | 11  | 38 | -- | --  |
|            | Ca(ICC2/PI489777)SNP_34865 | 442  | T | C | 100 | 91 | -- | --  |
|            | Ca(ICC2/PI489777)SNP_34866 | 768  | G | A | 51  | 65 | -- | --  |
| CakTC28826 | Ca(ICC2/PI489777)SNP_34867 | 334  | T | C | 4   | 3  | -- | --  |
| CakTC26003 | Ca(ICC2/PI489777)SNP_34868 | 782  | A | G | 3   | 3  | -- | --  |
|            | Ca(ICC2/PI489777)SNP_34869 | 797  | C | T | 5   | 5  | -- | --  |
|            | Ca(ICC2/PI489777)SNP_34870 | 884  | T | G | 5   | 4  | -- | --  |
| CakTC38815 | Ca(ICC2/PI489777)SNP_34871 | 157  | G | T | 4   | 11 | -- | --  |
|            | Ca(ICC2/PI489777)SNP_34872 | 629  | G | A | 13  | 8  | -- | --  |
|            | Ca(ICC2/PI489777)SNP_34873 | 1324 | A | C | 9   | 20 | -- | --  |
| CakTC42845 | Ca(ICC2/PI489777)SNP_34874 | 138  | C | G | 13  | 6  | -- | --  |
|            | Ca(ICC2/PI489777)SNP_34875 | 939  | T | C | 10  | 21 | -- | --  |
|            | Ca(ICC2/PI489777)SNP_34876 | 951  | A | G | 13  | 22 | -- | --  |
|            | Ca(ICC2/PI489777)SNP_34877 | 1621 | A | G | 11  | 7  | -- | --  |
|            | Ca(ICC2/PI489777)SNP_34878 | 1857 | G | A | 6   | 5  | -- | --  |
|            | Ca(ICC2/PI489777)SNP_34879 | 1930 | T | C | 3   | 3  | -- | --  |
| CakTC31073 | Ca(ICC2/PI489777)SNP_34880 | 554  | C | T | 3   | 4  | -- | --  |
|            | Ca(ICC2/PI489777)SNP_34881 | 689  | G | A | 4   | 4  | -- | --  |
|            | Ca(ICC2/PI489777)SNP_34882 | 725  | G | A | 3   | 5  | -- | --  |
| CakTC28894 | Ca(ICC2/PI489777)SNP_34883 | 804  | A | T | 3   | 3  | -- | --  |
| CakTC24206 | Ca(ICC2/PI489777)SNP_34884 | 281  | G | A | 6   | 6  | -- | --  |
| CakTC33661 | Ca(ICC2/PI489777)SNP_34885 | 1636 | T | G | 10  | 12 | -- | --  |
|            | Ca(ICC2/PI489777)SNP_34886 | 1813 | C | T | 7   | 4  | -- | --  |
| CakTC28391 | Ca(ICC2/PI489777)SNP_34887 | 632  | G | A | 7   | 8  | -- | --  |
|            | Ca(ICC2/PI489777)SNP_34888 | 641  | A | G | 6   | 7  | -- | --  |
|            | Ca(ICC2/PI489777)SNP_34889 | 1085 | A | G | 15  | 10 | -- | --  |
|            | Ca(ICC2/PI489777)SNP_34890 | 1145 | A | G | 23  | 14 | -- | --  |
| CakTC39481 | Ca(ICC2/PI489777)SNP_34891 | 935  | G | T | 3   | 7  | -- | --  |
| CakTC39555 | Ca(ICC2/PI489777)SNP_34892 | 411  | C | T | 37  | 33 | -- | --  |
|            | Ca(ICC2/PI489777)SNP_34893 | 430  | G | A | 41  | 36 | -- | --  |
|            | Ca(ICC2/PI489777)SNP_34894 | 594  | T | C | 54  | 47 | -- | --  |
|            | Ca(ICC2/PI489777)SNP_34895 | 606  | A | G | 63  | 49 | -- | --  |
|            | Ca(ICC2/PI489777)SNP_34896 | 819  | G | A | 71  | 44 | -- | --  |
|            | Ca(ICC2/PI489777)SNP_34897 | 1221 | C | A | 35  | 7  | -- | --  |
| CakTC25034 | Ca(ICC2/PI489777)SNP_34898 | 1699 | C | T | 4   | 3  | -- | --  |
| CakTC38808 | Ca(ICC2/PI489777)SNP_34899 | 185  | A | C | 13  | 6  | -- | --  |
|            | Ca(ICC2/PI489777)SNP_34900 | 435  | G | A | 9   | 8  | -- | --  |
|            | Ca(ICC2/PI489777)SNP_34901 | 951  | G | A | 12  | 5  | -- | --  |
| CakTC25048 | Ca(ICC2/PI489777)SNP_34902 | 282  | C | T | 4   | 3  | -- | --  |
|            | Ca(ICC2/PI489777)SNP_34903 | 423  | C | T | 5   | 4  | -- | --  |
|            | Ca(ICC2/PI489777)SNP_34904 | 557  | G | T | 8   | 6  | -- | --  |
|            | Ca(ICC2/PI489777)SNP_34905 | 840  | A | T | 4   | 6  | -- | --  |
|            | Ca(ICC2/PI489777)SNP_34906 | 894  | A | G | 5   | 5  | -- | --  |
| CakTC09033 | Ca(ICC2/PI489777)SNP_34907 | 1058 | C | A | 4   | 3  | -- | --  |
| CakTC23915 | Ca(ICC2/PI489777)SNP_34908 | 176  | C | T | 4   | 6  | -- | --  |
|            | Ca(ICC2/PI489777)SNP_34909 | 277  | T | A | 5   | 7  | -- | --  |
|            | Ca(ICC2/PI489777)SNP_34910 | 7047 | T | C | 13  | 6  | -- | --  |
|            | Ca(ICC2/PI489777)SNP_34911 | 7702 | C | G | 19  | 6  | -- | --  |
|            | Ca(ICC2/PI489777)SNP_34912 | 7764 | C | G | 14  | 5  | -- | --  |
| CakTC23545 | Ca(ICC2/PI489777)SNP_34913 | 637  | C | T | 102 | 36 | -- | --  |
| CakTC39921 | Ca(ICC2/PI489777)SNP_34914 | 162  | C | T | 3   | 3  | -- | --  |
|            | Ca(ICC2/PI489777)SNP_34915 | 185  | A | C | 3   | 4  | -- | --  |
|            | Ca(ICC2/PI489777)SNP_34916 | 195  | C | G | 3   | 4  | -- | --  |
|            | Ca(ICC2/PI489777)SNP_34917 | 231  | A | G | 8   | 10 | -- | --  |
|            | Ca(ICC2/PI489777)SNP_34918 | 250  | C | T | 10  | 11 | -- | --  |
|            | Ca(ICC2/PI489777)SNP_34919 | 684  | G | A | 33  | 17 | -- | --  |
|            | Ca(ICC2/PI489777)SNP_34920 | 728  | A | G | 33  | 15 | -- | --  |
|            | Ca(ICC2/PI489777)SNP_34921 | 796  | G | A | 34  | 11 | -- | --  |
|            | Ca(ICC2/PI489777)SNP_34922 | 1039 | G | A | 36  | 7  | -- | --  |
|            | Ca(ICC2/PI489777)SNP_34923 | 1230 | C | T | 47  | 5  | -- | --  |



|            |                            |      |   |   |     |     |       |            |
|------------|----------------------------|------|---|---|-----|-----|-------|------------|
| CakTC38731 | Ca(ICC2/PI489777)SNP_34924 | 426  | G | A | 17  | 5   | --    | --         |
|            | Ca(ICC2/PI489777)SNP_34925 | 446  | T | C | 16  | 5   | --    | --         |
|            | Ca(ICC2/PI489777)SNP_34926 | 507  | A | G | 16  | 5   | --    | --         |
|            | Ca(ICC2/PI489777)SNP_34927 | 535  | C | T | 17  | 3   | --    | --         |
|            | Ca(ICC2/PI489777)SNP_34928 | 543  | A | G | 17  | 4   | --    | --         |
| CakTC13886 | Ca(ICC2/PI489777)SNP_34929 | 164  | C | T | 9   | 3   | --    | LOB        |
| CakTC36849 | Ca(ICC2/PI489777)SNP_34930 | 171  | T | C | 8   | 9   | --    | --         |
|            | Ca(ICC2/PI489777)SNP_34931 | 1112 | A | C | 29  | 17  | --    | --         |
|            | Ca(ICC2/PI489777)SNP_34932 | 1304 | T | C | 18  | 12  | --    | --         |
|            | Ca(ICC2/PI489777)SNP_34933 | 1635 | A | G | 15  | 13  | --    | --         |
|            | Ca(ICC2/PI489777)SNP_34934 | 1910 | A | G | 20  | 13  | --    | --         |
| CakTC32797 | Ca(ICC2/PI489777)SNP_34935 | 2594 | T | C | 8   | 4   | --    | TPR        |
| CakTC14977 | Ca(ICC2/PI489777)SNP_34936 | 106  | C | T | 4   | 5   | --    | --         |
| CakTC23872 | Ca(ICC2/PI489777)SNP_34937 | 543  | C | G | 25  | 18  | --    | --         |
|            | Ca(ICC2/PI489777)SNP_34938 | 1382 | G | C | 30  | 11  | --    | --         |
| CakTC25459 | Ca(ICC2/PI489777)SNP_34939 | 176  | C | T | 6   | 5   | --    | --         |
|            | Ca(ICC2/PI489777)SNP_34940 | 232  | G | A | 7   | 4   | --    | --         |
|            | Ca(ICC2/PI489777)SNP_34941 | 619  | A | T | 28  | 10  | --    | --         |
|            | Ca(ICC2/PI489777)SNP_34942 | 778  | G | A | 30  | 7   | --    | --         |
|            | Ca(ICC2/PI489777)SNP_34943 | 925  | C | T | 25  | 10  | --    | --         |
|            | Ca(ICC2/PI489777)SNP_34944 | 1421 | C | T | 6   | 5   | --    | --         |
|            | Ca(ICC2/PI489777)SNP_34945 | 1448 | G | T | 5   | 4   | --    | --         |
|            | Ca(ICC2/PI489777)SNP_34946 | 1454 | A | T | 6   | 3   | --    | --         |
| CakTC37595 | Ca(ICC2/PI489777)SNP_34947 | 843  | C | T | 21  | 14  | --    | --         |
| CakTC39220 | Ca(ICC2/PI489777)SNP_34948 | 169  | G | C | 7   | 4   | --    | --         |
|            | Ca(ICC2/PI489777)SNP_34949 | 625  | C | A | 14  | 8   | --    | --         |
| CakTC27438 | Ca(ICC2/PI489777)SNP_34950 | 449  | A | C | 141 | 83  | --    | --         |
|            | Ca(ICC2/PI489777)SNP_34951 | 591  | G | A | 119 | 71  | --    | --         |
| CakTC32926 | Ca(ICC2/PI489777)SNP_34952 | 228  | G | A | 28  | 14  | --    | --         |
|            | Ca(ICC2/PI489777)SNP_34953 | 324  | C | G | 33  | 17  | --    | --         |
|            | Ca(ICC2/PI489777)SNP_34954 | 333  | A | T | 33  | 17  | --    | --         |
|            | Ca(ICC2/PI489777)SNP_34955 | 342  | T | A | 33  | 17  | --    | --         |
| CakTC27338 | Ca(ICC2/PI489777)SNP_34956 | 853  | C | T | 40  | 48  | --    | --         |
|            | Ca(ICC2/PI489777)SNP_34957 | 1177 | C | T | 70  | 92  | --    | --         |
|            | Ca(ICC2/PI489777)SNP_34958 | 1267 | C | T | 77  | 111 | --    | --         |
|            | Ca(ICC2/PI489777)SNP_34959 | 1321 | C | T | 91  | 100 | --    | --         |
|            | Ca(ICC2/PI489777)SNP_34960 | 1342 | C | T | 89  | 94  | --    | --         |
|            | Ca(ICC2/PI489777)SNP_34961 | 1591 | C | T | 70  | 87  | --    | --         |
|            | Ca(ICC2/PI489777)SNP_34962 | 1603 | C | T | 65  | 90  | --    | --         |
|            | Ca(ICC2/PI489777)SNP_34963 | 1609 | A | C | 65  | 91  | --    | --         |
|            | Ca(ICC2/PI489777)SNP_34964 | 1814 | A | G | 21  | 40  | --    | --         |
| CakTC43376 | Ca(ICC2/PI489777)SNP_34965 | 459  | T | A | 10  | 5   | --    | C2C2-YABBY |
|            | Ca(ICC2/PI489777)SNP_34966 | 531  | C | A | 10  | 8   | --    | C2C2-YABBY |
|            | Ca(ICC2/PI489777)SNP_34967 | 836  | G | A | 10  | 6   | --    | C2C2-YABBY |
| CakTC41380 | Ca(ICC2/PI489777)SNP_34968 | 392  | T | G | 8   | 9   | --    | ARF        |
|            | Ca(ICC2/PI489777)SNP_34969 | 948  | C | T | 17  | 21  | --    | ARF        |
|            | Ca(ICC2/PI489777)SNP_34970 | 1052 | T | C | 15  | 18  | --    | ARF        |
|            | Ca(ICC2/PI489777)SNP_34971 | 1440 | G | A | 14  | 13  | --    | ARF        |
| CakTC29998 | Ca(ICC2/PI489777)SNP_34972 | 1317 | C | T | 7   | 9   | --    | --         |
|            | Ca(ICC2/PI489777)SNP_34973 | 2055 | C | G | 11  | 3   | --    | --         |
|            | Ca(ICC2/PI489777)SNP_34974 | 2208 | A | G | 11  | 7   | --    | --         |
|            | Ca(ICC2/PI489777)SNP_34975 | 2212 | A | G | 11  | 8   | --    | --         |
|            | Ca(ICC2/PI489777)SNP_34976 | 2232 | G | A | 8   | 8   | --    | --         |
|            | Ca(ICC2/PI489777)SNP_34977 | 2391 | C | T | 7   | 8   | --    | --         |
| CakTC24120 | Ca(ICC2/PI489777)SNP_34978 | 506  | A | G | 11  | 3   | Shoot | --         |
| CakTC38488 | Ca(ICC2/PI489777)SNP_34979 | 132  | C | T | 4   | 6   | --    | --         |
|            | Ca(ICC2/PI489777)SNP_34980 | 195  | G | A | 5   | 7   | --    | --         |
|            | Ca(ICC2/PI489777)SNP_34981 | 200  | G | C | 5   | 7   | --    | --         |
|            | Ca(ICC2/PI489777)SNP_34982 | 675  | G | A | 11  | 5   | --    | --         |
| CakTC39737 | Ca(ICC2/PI489777)SNP_34983 | 139  | G | C | 3   | 5   | --    | --         |
| CakTC28149 | Ca(ICC2/PI489777)SNP_34984 | 665  | A | C | 13  | 9   | --    | TPR        |
|            | Ca(ICC2/PI489777)SNP_34985 | 771  | G | A | 8   | 5   | --    | TPR        |
| CakTC03711 | Ca(ICC2/PI489777)SNP_34986 | 1454 | T | C | 4   | 3   | --    | --         |
| CakTC38801 | Ca(ICC2/PI489777)SNP_34987 | 544  | T | C | 18  | 11  | --    | --         |
| CakTC11453 | Ca(ICC2/PI489777)SNP_34988 | 612  | G | A | 5   | 5   | --    | --         |
|            | Ca(ICC2/PI489777)SNP_34989 | 777  | T | C | 12  | 5   | --    | --         |
|            | Ca(ICC2/PI489777)SNP_34990 | 834  | A | G | 10  | 3   | --    | --         |
|            | Ca(ICC2/PI489777)SNP_34991 | 864  | C | T | 10  | 3   | --    | --         |
|            | Ca(ICC2/PI489777)SNP_34992 | 894  | A | G | 9   | 3   | --    | --         |
|            | Ca(ICC2/PI489777)SNP_34993 | 948  | G | C | 9   | 4   | --    | --         |
|            | Ca(ICC2/PI489777)SNP_34994 | 3244 | A | G | 8   | 8   | --    | --         |
|            | Ca(ICC2/PI489777)SNP_34995 | 3560 | C | T | 8   | 4   | --    | --         |
| CakTC41137 | Ca(ICC2/PI489777)SNP_34996 | 247  | C | A | 10  | 4   | --    | --         |
| CakTC36434 | Ca(ICC2/PI489777)SNP_34997 | 360  | T | A | 13  | 3   | --    | --         |

|            |                            |      |   |   |    |    |    |    |
|------------|----------------------------|------|---|---|----|----|----|----|
|            | Ca(ICC2/PI489777)SNP_34998 | 1649 | G | A | 10 | 6  | -- | -- |
|            | Ca(ICC2/PI489777)SNP_34999 | 1725 | A | G | 15 | 5  | -- | -- |
|            | Ca(ICC2/PI489777)SNP_35000 | 2282 | C | A | 7  | 4  | -- | -- |
|            | Ca(ICC2/PI489777)SNP_35001 | 2286 | A | G | 7  | 4  | -- | -- |
|            | Ca(ICC2/PI489777)SNP_35002 | 2321 | G | A | 8  | 4  | -- | -- |
|            | Ca(ICC2/PI489777)SNP_35003 | 2379 | C | A | 4  | 4  | -- | -- |
|            | Ca(ICC2/PI489777)SNP_35004 | 2408 | C | T | 4  | 4  | -- | -- |
| CakTC39640 | Ca(ICC2/PI489777)SNP_35005 | 256  | G | C | 12 | 7  | -- | -- |
|            | Ca(ICC2/PI489777)SNP_35006 | 367  | T | C | 14 | 8  | -- | -- |
|            | Ca(ICC2/PI489777)SNP_35007 | 1217 | T | C | 12 | 9  | -- | -- |
|            | Ca(ICC2/PI489777)SNP_35008 | 1283 | G | A | 8  | 4  | -- | -- |
| CakTC31323 | Ca(ICC2/PI489777)SNP_35009 | 1567 | C | T | 4  | 4  | -- | -- |
|            | Ca(ICC2/PI489777)SNP_35010 | 1594 | A | T | 4  | 4  | -- | -- |
| CakTC10441 | Ca(ICC2/PI489777)SNP_35011 | 42   | C | G | 34 | 10 | -- | -- |
|            | Ca(ICC2/PI489777)SNP_35012 | 152  | G | A | 65 | 19 | -- | -- |
| CakTC37977 | Ca(ICC2/PI489777)SNP_35013 | 95   | T | C | 9  | 11 | -- | -- |
|            | Ca(ICC2/PI489777)SNP_35014 | 743  | A | G | 93 | 52 | -- | -- |
|            | Ca(ICC2/PI489777)SNP_35015 | 895  | G | A | 72 | 44 | -- | -- |
| CakTC37402 | Ca(ICC2/PI489777)SNP_35016 | 535  | C | G | 15 | 8  | -- | -- |
| CakTC35460 | Ca(ICC2/PI489777)SNP_35017 | 1258 | G | A | 10 | 15 | -- | -- |
|            | Ca(ICC2/PI489777)SNP_35018 | 1755 | T | C | 14 | 7  | -- | -- |
|            | Ca(ICC2/PI489777)SNP_35019 | 1890 | T | C | 12 | 9  | -- | -- |
|            | Ca(ICC2/PI489777)SNP_35020 | 4097 | T | G | 7  | 6  | -- | -- |
| CakTC29224 | Ca(ICC2/PI489777)SNP_35021 | 1293 | G | A | 7  | 4  | -- | -- |
|            | Ca(ICC2/PI489777)SNP_35022 | 1852 | A | C | 4  | 7  | -- | -- |
|            | Ca(ICC2/PI489777)SNP_35023 | 1962 | G | T | 4  | 9  | -- | -- |
|            | Ca(ICC2/PI489777)SNP_35024 | 2111 | G | T | 6  | 5  | -- | -- |
|            | Ca(ICC2/PI489777)SNP_35025 | 2291 | T | G | 3  | 5  | -- | -- |
| CakTC37935 | Ca(ICC2/PI489777)SNP_35026 | 93   | C | T | 10 | 5  | -- | -- |
|            | Ca(ICC2/PI489777)SNP_35027 | 468  | C | T | 14 | 4  | -- | -- |
| CakTC29660 | Ca(ICC2/PI489777)SNP_35028 | 1504 | A | T | 4  | 3  | -- | -- |
| CakTC06217 | Ca(ICC2/PI489777)SNP_35029 | 1000 | C | T | 6  | 4  | -- | -- |
|            | Ca(ICC2/PI489777)SNP_35030 | 1051 | T | C | 6  | 4  | -- | -- |
|            | Ca(ICC2/PI489777)SNP_35031 | 1879 | G | A | 3  | 3  | -- | -- |
| CakTC33033 | Ca(ICC2/PI489777)SNP_35032 | 373  | C | G | 25 | 32 | -- | -- |
|            | Ca(ICC2/PI489777)SNP_35033 | 1120 | T | C | 21 | 16 | -- | -- |
| CakTC34799 | Ca(ICC2/PI489777)SNP_35034 | 646  | A | G | 5  | 9  | -- | -- |
|            | Ca(ICC2/PI489777)SNP_35035 | 2658 | C | T | 6  | 6  | -- | -- |
|            | Ca(ICC2/PI489777)SNP_35036 | 2944 | C | A | 4  | 4  | -- | -- |
|            | Ca(ICC2/PI489777)SNP_35037 | 2945 | C | T | 4  | 4  | -- | -- |
|            | Ca(ICC2/PI489777)SNP_35038 | 2958 | A | C | 4  | 3  | -- | -- |
| CakTC32622 | Ca(ICC2/PI489777)SNP_35039 | 735  | A | G | 20 | 8  | -- | -- |
|            | Ca(ICC2/PI489777)SNP_35040 | 846  | A | T | 18 | 7  | -- | -- |
|            | Ca(ICC2/PI489777)SNP_35041 | 4071 | A | G | 5  | 8  | -- | -- |
|            | Ca(ICC2/PI489777)SNP_35042 | 4439 | T | C | 10 | 7  | -- | -- |
|            | Ca(ICC2/PI489777)SNP_35043 | 5918 | C | T | 3  | 4  | -- | -- |
| CakTC40967 | Ca(ICC2/PI489777)SNP_35044 | 1451 | C | G | 20 | 10 | -- | -- |
|            | Ca(ICC2/PI489777)SNP_35045 | 1553 | A | G | 14 | 6  | -- | -- |
| CakTC42594 | Ca(ICC2/PI489777)SNP_35046 | 385  | A | G | 5  | 3  | -- | -- |
|            | Ca(ICC2/PI489777)SNP_35047 | 877  | T | C | 5  | 5  | -- | -- |
| CakTC23818 | Ca(ICC2/PI489777)SNP_35048 | 95   | A | T | 16 | 4  | -- | -- |
|            | Ca(ICC2/PI489777)SNP_35049 | 108  | A | T | 21 | 5  | -- | -- |
|            | Ca(ICC2/PI489777)SNP_35050 | 365  | A | G | 28 | 3  | -- | -- |
|            | Ca(ICC2/PI489777)SNP_35051 | 368  | C | G | 28 | 3  | -- | -- |
| CakTC31429 | Ca(ICC2/PI489777)SNP_35052 | 1259 | T | G | 18 | 8  | -- | -- |
| CakTC30592 | Ca(ICC2/PI489777)SNP_35053 | 421  | G | A | 8  | 4  | -- | -- |
|            | Ca(ICC2/PI489777)SNP_35054 | 1003 | T | C | 10 | 13 | -- | -- |
| CakTC38099 | Ca(ICC2/PI489777)SNP_35055 | 135  | T | C | 8  | 3  | -- | -- |
|            | Ca(ICC2/PI489777)SNP_35056 | 410  | A | G | 20 | 12 | -- | -- |
|            | Ca(ICC2/PI489777)SNP_35057 | 644  | T | C | 19 | 23 | -- | -- |
|            | Ca(ICC2/PI489777)SNP_35058 | 781  | A | G | 19 | 19 | -- | -- |
|            | Ca(ICC2/PI489777)SNP_35059 | 782  | G | A | 19 | 19 | -- | -- |
| CakTC39229 | Ca(ICC2/PI489777)SNP_35060 | 1111 | G | T | 9  | 18 | -- | -- |
|            | Ca(ICC2/PI489777)SNP_35061 | 1126 | A | G | 10 | 16 | -- | -- |
| CakTC30954 | Ca(ICC2/PI489777)SNP_35062 | 254  | A | T | 9  | 4  | -- | -- |
|            | Ca(ICC2/PI489777)SNP_35063 | 296  | A | T | 9  | 6  | -- | -- |
|            | Ca(ICC2/PI489777)SNP_35064 | 472  | T | A | 11 | 8  | -- | -- |
|            | Ca(ICC2/PI489777)SNP_35065 | 1018 | A | C | 16 | 12 | -- | -- |
| CakTC18990 | Ca(ICC2/PI489777)SNP_35066 | 769  | C | G | 22 | 3  | -- | -- |
|            | Ca(ICC2/PI489777)SNP_35067 | 861  | C | T | 23 | 4  | -- | -- |
| CakTC27400 | Ca(ICC2/PI489777)SNP_35068 | 1028 | C | T | 6  | 20 | -- | -- |
| CakTC23153 | Ca(ICC2/PI489777)SNP_35069 | 497  | G | A | 22 | 9  | -- | -- |
| CakTC25937 | Ca(ICC2/PI489777)SNP_35070 | 376  | A | G | 27 | 12 | -- | -- |
|            | Ca(ICC2/PI489777)SNP_35071 | 496  | A | G | 23 | 16 | -- | -- |

|            |                            |      |   |   |     |    |           |        |
|------------|----------------------------|------|---|---|-----|----|-----------|--------|
| CakTC31290 | Ca(ICC2/PI489777)SNP_35072 | 320  | T | C | 5   | 6  | --        | --     |
|            | Ca(ICC2/PI489777)SNP_35073 | 380  | C | T | 5   | 3  | --        | --     |
| CakTC28298 | Ca(ICC2/PI489777)SNP_35074 | 1738 | T | C | 9   | 8  | --        | CCHC   |
| CakTC04550 | Ca(ICC2/PI489777)SNP_35075 | 67   | G | A | 4   | 5  | --        | --     |
|            | Ca(ICC2/PI489777)SNP_35076 | 257  | C | T | 6   | 10 | --        | --     |
|            | Ca(ICC2/PI489777)SNP_35077 | 374  | A | T | 4   | 12 | --        | --     |
|            | Ca(ICC2/PI489777)SNP_35078 | 487  | G | A | 4   | 11 | --        | --     |
|            | Ca(ICC2/PI489777)SNP_35079 | 988  | G | T | 7   | 3  | --        | --     |
|            | Ca(ICC2/PI489777)SNP_35080 | 1351 | A | G | 10  | 9  | --        | --     |
|            | Ca(ICC2/PI489777)SNP_35081 | 1354 | G | T | 10  | 9  | --        | --     |
|            | Ca(ICC2/PI489777)SNP_35082 | 1414 | G | A | 11  | 15 | --        | --     |
|            | Ca(ICC2/PI489777)SNP_35083 | 1741 | T | C | 11  | 23 | --        | --     |
|            | Ca(ICC2/PI489777)SNP_35084 | 2268 | C | T | 3   | 3  | --        | --     |
| CakTC30134 | Ca(ICC2/PI489777)SNP_35085 | 354  | A | T | 7   | 8  | --        | --     |
| CakTC29856 | Ca(ICC2/PI489777)SNP_35086 | 416  | A | G | 15  | 16 | --        | --     |
|            | Ca(ICC2/PI489777)SNP_35087 | 704  | G | C | 32  | 4  | --        | --     |
|            | Ca(ICC2/PI489777)SNP_35088 | 986  | G | C | 20  | 7  | --        | --     |
|            | Ca(ICC2/PI489777)SNP_35089 | 1316 | C | T | 25  | 5  | --        | --     |
|            | Ca(ICC2/PI489777)SNP_35090 | 1659 | G | A | 22  | 5  | --        | --     |
|            | Ca(ICC2/PI489777)SNP_35091 | 2087 | A | G | 25  | 18 | --        | --     |
|            | Ca(ICC2/PI489777)SNP_35092 | 2557 | A | G | 39  | 6  | --        | --     |
|            | Ca(ICC2/PI489777)SNP_35093 | 2722 | T | C | 27  | 11 | --        | --     |
|            | Ca(ICC2/PI489777)SNP_35094 | 2867 | A | C | 22  | 9  | --        | --     |
|            | Ca(ICC2/PI489777)SNP_35095 | 3247 | A | C | 27  | 22 | --        | --     |
|            | Ca(ICC2/PI489777)SNP_35096 | 3294 | A | G | 20  | 19 | --        | --     |
|            | Ca(ICC2/PI489777)SNP_35097 | 3521 | C | G | 5   | 3  | --        | --     |
|            | Ca(ICC2/PI489777)SNP_35098 | 3613 | T | C | 3   | 3  | --        | --     |
| CakTC02699 | Ca(ICC2/PI489777)SNP_35099 | 479  | A | G | 4   | 3  | --        | E2F-DP |
| CakTC25202 | Ca(ICC2/PI489777)SNP_35100 | 436  | C | T | 17  | 5  | --        | --     |
|            | Ca(ICC2/PI489777)SNP_35101 | 649  | T | G | 47  | 10 | --        | --     |
|            | Ca(ICC2/PI489777)SNP_35102 | 748  | C | T | 47  | 14 | --        | --     |
|            | Ca(ICC2/PI489777)SNP_35103 | 760  | C | T | 59  | 15 | --        | --     |
|            | Ca(ICC2/PI489777)SNP_35104 | 1471 | C | T | 31  | 16 | --        | --     |
| CakTC23058 | Ca(ICC2/PI489777)SNP_35105 | 627  | G | A | 75  | 14 | --        | --     |
| CakTC27166 | Ca(ICC2/PI489777)SNP_35106 | 554  | G | A | 60  | 30 | --        | --     |
| CakTC34236 | Ca(ICC2/PI489777)SNP_35107 | 181  | C | T | 21  | 8  | --        | --     |
|            | Ca(ICC2/PI489777)SNP_35108 | 241  | G | T | 21  | 9  | --        | --     |
|            | Ca(ICC2/PI489777)SNP_35109 | 490  | A | T | 7   | 5  | --        | --     |
|            | Ca(ICC2/PI489777)SNP_35110 | 538  | A | G | 3   | 5  | --        | --     |
| CakTC36369 | Ca(ICC2/PI489777)SNP_35111 | 1045 | A | G | 14  | 6  | --        | --     |
|            | Ca(ICC2/PI489777)SNP_35112 | 2153 | G | T | 16  | 5  | --        | --     |
|            | Ca(ICC2/PI489777)SNP_35113 | 2554 | A | G | 26  | 6  | --        | --     |
|            | Ca(ICC2/PI489777)SNP_35114 | 2626 | T | A | 28  | 4  | --        | --     |
| CakTC10607 | Ca(ICC2/PI489777)SNP_35115 | 730  | G | A | 6   | 3  | --        | TCP    |
| CakTC28183 | Ca(ICC2/PI489777)SNP_35116 | 1209 | A | G | 3   | 5  | Flower    | bud    |
|            | Ca(ICC2/PI489777)SNP_35117 | 1350 | G | T | 3   | 5  | Flower    | bud    |
|            | Ca(ICC2/PI489777)SNP_35118 | 1648 | T | C | 4   | 5  | Flower    | bud    |
|            | Ca(ICC2/PI489777)SNP_35119 | 1723 | T | A | 4   | 5  | Flower    | bud    |
| CakTC36773 | Ca(ICC2/PI489777)SNP_35120 | 1627 | G | A | 7   | 5  | Young_pod | --     |
| CakTC41418 | Ca(ICC2/PI489777)SNP_35121 | 1242 | C | A | 10  | 10 | --        | --     |
|            | Ca(ICC2/PI489777)SNP_35122 | 1643 | T | C | 7   | 5  | --        | --     |
|            | Ca(ICC2/PI489777)SNP_35123 | 1713 | A | G | 6   | 4  | --        | --     |
|            | Ca(ICC2/PI489777)SNP_35124 | 1768 | G | C | 7   | 4  | --        | --     |
|            | Ca(ICC2/PI489777)SNP_35125 | 1814 | G | A | 7   | 4  | --        | --     |
| CakTC41948 | Ca(ICC2/PI489777)SNP_35126 | 227  | G | T | 13  | 15 | --        | --     |
|            | Ca(ICC2/PI489777)SNP_35127 | 395  | G | C | 23  | 28 | --        | --     |
|            | Ca(ICC2/PI489777)SNP_35128 | 505  | G | A | 22  | 35 | --        | --     |
|            | Ca(ICC2/PI489777)SNP_35129 | 704  | G | T | 18  | 42 | --        | --     |
|            | Ca(ICC2/PI489777)SNP_35130 | 956  | G | A | 14  | 25 | --        | --     |
|            | Ca(ICC2/PI489777)SNP_35131 | 1205 | A | G | 20  | 14 | --        | --     |
|            | Ca(ICC2/PI489777)SNP_35132 | 1695 | A | G | 10  | 14 | --        | --     |
| CakTC38665 | Ca(ICC2/PI489777)SNP_35133 | 627  | G | T | 4   | 11 | --        | --     |
| CakTC38276 | Ca(ICC2/PI489777)SNP_35134 | 428  | A | G | 9   | 4  | --        | bHLH   |
| CakTC40112 | Ca(ICC2/PI489777)SNP_35135 | 737  | A | G | 5   | 5  | --        | --     |
|            | Ca(ICC2/PI489777)SNP_35136 | 866  | G | T | 4   | 5  | --        | --     |
| CakTC24238 | Ca(ICC2/PI489777)SNP_35137 | 613  | G | A | 70  | 42 | --        | CCHC   |
|            | Ca(ICC2/PI489777)SNP_35138 | 895  | G | A | 50  | 46 | --        | CCHC   |
| CakTC25528 | Ca(ICC2/PI489777)SNP_35139 | 324  | C | T | 100 | 26 | --        | ARF    |
|            | Ca(ICC2/PI489777)SNP_35140 | 2419 | C | T | 41  | 26 | --        | ARF    |
| CakTC28300 | Ca(ICC2/PI489777)SNP_35141 | 872  | C | A | 10  | 3  | --        | --     |
|            | Ca(ICC2/PI489777)SNP_35142 | 1547 | A | G | 5   | 3  | --        | --     |
| CakTC36857 | Ca(ICC2/PI489777)SNP_35143 | 758  | G | A | 9   | 3  | --        | --     |
|            | Ca(ICC2/PI489777)SNP_35144 | 1488 | A | G | 9   | 4  | --        | --     |
|            | Ca(ICC2/PI489777)SNP_35145 | 2197 | T | C | 10  | 12 | --        | --     |

|            |                            |      |   |   |    |    |       |     |
|------------|----------------------------|------|---|---|----|----|-------|-----|
|            | Ca(ICC2/PI489777)SNP_35146 | 2395 | G | A | 5  | 11 | --    | --  |
|            | Ca(ICC2/PI489777)SNP_35147 | 2487 | T | C | 6  | 9  | --    | --  |
| CakTC41678 | Ca(ICC2/PI489777)SNP_35148 | 513  | G | A | 13 | 18 | --    | --  |
| CakTC32526 | Ca(ICC2/PI489777)SNP_35149 | 139  | G | C | 11 | 5  | Root  | --  |
|            | Ca(ICC2/PI489777)SNP_35150 | 925  | G | A | 53 | 40 | Root  | --  |
| CakTC34613 | Ca(ICC2/PI489777)SNP_35151 | 176  | A | T | 18 | 14 | --    | --  |
| CakTC26471 | Ca(ICC2/PI489777)SNP_35152 | 422  | C | T | 19 | 6  | Root  | --  |
|            | Ca(ICC2/PI489777)SNP_35153 | 434  | A | G | 18 | 7  | Root  | --  |
|            | Ca(ICC2/PI489777)SNP_35154 | 473  | G | A | 17 | 5  | Root  | --  |
|            | Ca(ICC2/PI489777)SNP_35155 | 1160 | T | A | 9  | 14 | Root  | --  |
|            | Ca(ICC2/PI489777)SNP_35156 | 1310 | T | C | 9  | 14 | Root  | --  |
| CakTC40602 | Ca(ICC2/PI489777)SNP_35157 | 659  | A | G | 44 | 44 | --    | --  |
| CakTC31432 | Ca(ICC2/PI489777)SNP_35158 | 1018 | T | C | 54 | 17 | --    | --  |
|            | Ca(ICC2/PI489777)SNP_35159 | 1283 | T | A | 39 | 16 | --    | --  |
|            | Ca(ICC2/PI489777)SNP_35160 | 1559 | G | A | 31 | 16 | --    | --  |
|            | Ca(ICC2/PI489777)SNP_35161 | 1627 | T | C | 34 | 10 | --    | --  |
| CakTC40472 | Ca(ICC2/PI489777)SNP_35162 | 60   | C | T | 3  | 3  | --    | --  |
|            | Ca(ICC2/PI489777)SNP_35163 | 141  | C | G | 4  | 4  | --    | --  |
|            | Ca(ICC2/PI489777)SNP_35164 | 144  | T | C | 5  | 4  | --    | --  |
|            | Ca(ICC2/PI489777)SNP_35165 | 207  | T | C | 7  | 5  | --    | --  |
|            | Ca(ICC2/PI489777)SNP_35166 | 237  | G | A | 8  | 4  | --    | --  |
|            | Ca(ICC2/PI489777)SNP_35167 | 327  | T | C | 12 | 3  | --    | --  |
|            | Ca(ICC2/PI489777)SNP_35168 | 447  | T | C | 16 | 3  | --    | --  |
| CakTC29669 | Ca(ICC2/PI489777)SNP_35169 | 105  | A | C | 84 | 30 | --    | --  |
|            | Ca(ICC2/PI489777)SNP_35170 | 913  | A | G | 64 | 47 | --    | --  |
|            | Ca(ICC2/PI489777)SNP_35171 | 974  | T | A | 56 | 40 | --    | --  |
|            | Ca(ICC2/PI489777)SNP_35172 | 1077 | T | G | 27 | 22 | --    | --  |
| CakTC36374 | Ca(ICC2/PI489777)SNP_35173 | 519  | G | A | 25 | 9  | --    | PHD |
|            | Ca(ICC2/PI489777)SNP_35174 | 594  | A | G | 25 | 14 | --    | PHD |
|            | Ca(ICC2/PI489777)SNP_35175 | 1064 | T | G | 17 | 9  | --    | PHD |
| CakTC43300 | Ca(ICC2/PI489777)SNP_35176 | 234  | C | A | 15 | 4  | --    | --  |
|            | Ca(ICC2/PI489777)SNP_35177 | 410  | T | C | 19 | 3  | --    | --  |
| CakTC25504 | Ca(ICC2/PI489777)SNP_35178 | 2291 | A | G | 5  | 8  | --    | --  |
|            | Ca(ICC2/PI489777)SNP_35179 | 3116 | T | C | 11 | 5  | --    | --  |
| CakTC40590 | Ca(ICC2/PI489777)SNP_35180 | 250  | T | C | 6  | 5  | --    | --  |
| CakTC31481 | Ca(ICC2/PI489777)SNP_35181 | 1044 | A | C | 27 | 25 | --    | C3H |
|            | Ca(ICC2/PI489777)SNP_35182 | 1750 | C | T | 18 | 13 | --    | C3H |
|            | Ca(ICC2/PI489777)SNP_35183 | 2955 | T | A | 11 | 10 | --    | C3H |
| CakTC24831 | Ca(ICC2/PI489777)SNP_35184 | 1502 | G | A | 20 | 9  | --    | --  |
| CakTC31599 | Ca(ICC2/PI489777)SNP_35185 | 260  | G | A | 6  | 8  | --    | --  |
|            | Ca(ICC2/PI489777)SNP_35186 | 314  | A | G | 6  | 9  | --    | --  |
|            | Ca(ICC2/PI489777)SNP_35187 | 957  | A | G | 7  | 11 | --    | --  |
|            | Ca(ICC2/PI489777)SNP_35188 | 1136 | A | G | 3  | 3  | --    | --  |
|            | Ca(ICC2/PI489777)SNP_35189 | 1245 | G | A | 3  | 4  | --    | --  |
| CakTC28075 | Ca(ICC2/PI489777)SNP_35190 | 752  | A | G | 5  | 5  | --    | --  |
| CakTC37251 | Ca(ICC2/PI489777)SNP_35191 | 1665 | A | T | 17 | 9  | --    | MYB |
|            | Ca(ICC2/PI489777)SNP_35192 | 1889 | C | T | 17 | 11 | --    | MYB |
| CakTC27787 | Ca(ICC2/PI489777)SNP_35193 | 111  | C | T | 8  | 8  | --    | --  |
|            | Ca(ICC2/PI489777)SNP_35194 | 120  | C | T | 9  | 8  | --    | --  |
|            | Ca(ICC2/PI489777)SNP_35195 | 438  | T | G | 18 | 8  | --    | --  |
|            | Ca(ICC2/PI489777)SNP_35196 | 459  | A | G | 19 | 9  | --    | --  |
|            | Ca(ICC2/PI489777)SNP_35197 | 731  | C | T | 20 | 10 | --    | --  |
|            | Ca(ICC2/PI489777)SNP_35198 | 767  | A | G | 14 | 13 | --    | --  |
|            | Ca(ICC2/PI489777)SNP_35199 | 1287 | T | C | 22 | 5  | --    | --  |
|            | Ca(ICC2/PI489777)SNP_35200 | 1347 | C | T | 20 | 5  | --    | --  |
| CakTC41269 | Ca(ICC2/PI489777)SNP_35201 | 343  | G | A | 4  | 7  | --    | --  |
|            | Ca(ICC2/PI489777)SNP_35202 | 375  | G | A | 4  | 7  | --    | --  |
| CakTC26390 | Ca(ICC2/PI489777)SNP_35203 | 696  | G | T | 11 | 4  | --    | --  |
|            | Ca(ICC2/PI489777)SNP_35204 | 872  | C | T | 8  | 3  | --    | --  |
| CakTC38197 | Ca(ICC2/PI489777)SNP_35205 | 159  | C | T | 12 | 5  | --    | --  |
|            | Ca(ICC2/PI489777)SNP_35206 | 271  | G | A | 25 | 7  | --    | --  |
|            | Ca(ICC2/PI489777)SNP_35207 | 461  | C | T | 29 | 9  | --    | --  |
|            | Ca(ICC2/PI489777)SNP_35208 | 710  | C | T | 18 | 7  | --    | --  |
|            | Ca(ICC2/PI489777)SNP_35209 | 716  | C | T | 16 | 8  | --    | --  |
|            | Ca(ICC2/PI489777)SNP_35210 | 801  | G | C | 13 | 5  | --    | --  |
|            | Ca(ICC2/PI489777)SNP_35211 | 833  | C | A | 15 | 5  | --    | --  |
|            | Ca(ICC2/PI489777)SNP_35212 | 851  | C | T | 15 | 5  | --    | --  |
|            | Ca(ICC2/PI489777)SNP_35213 | 852  | C | G | 15 | 5  | --    | --  |
|            | Ca(ICC2/PI489777)SNP_35214 | 888  | G | C | 12 | 3  | --    | --  |
| CakTC30345 | Ca(ICC2/PI489777)SNP_35215 | 527  | G | A | 5  | 5  | Shoot | --  |
| CakTC39784 | Ca(ICC2/PI489777)SNP_35216 | 136  | C | T | 5  | 4  | --    | --  |
|            | Ca(ICC2/PI489777)SNP_35217 | 1028 | A | G | 6  | 3  | --    | --  |
|            | Ca(ICC2/PI489777)SNP_35218 | 1112 | A | G | 10 | 5  | --    | --  |
|            | Ca(ICC2/PI489777)SNP_35219 | 1222 | T | C | 6  | 10 | --    | --  |

|            |                             |      |   |   |    |    |           |              |
|------------|-----------------------------|------|---|---|----|----|-----------|--------------|
|            | Ca(ICCV2/PI489777)SNP_35220 | 1470 | A | G | 14 | 10 | --        | --           |
| CakTC30824 | Ca(ICCV2/PI489777)SNP_35221 | 582  | A | G | 6  | 6  | Young_pod | --           |
|            | Ca(ICCV2/PI489777)SNP_35222 | 707  | T | C | 5  | 5  | Young_pod | --           |
| CakTC24781 | Ca(ICCV2/PI489777)SNP_35223 | 1243 | A | G | 32 | 5  | --        | --           |
|            | Ca(ICCV2/PI489777)SNP_35224 | 1682 | G | A | 13 | 7  | --        | --           |
| CakTC40800 | Ca(ICCV2/PI489777)SNP_35225 | 846  | A | G | 12 | 5  | --        | --           |
|            | Ca(ICCV2/PI489777)SNP_35226 | 849  | T | A | 6  | 5  | --        | --           |
|            | Ca(ICCV2/PI489777)SNP_35227 | 1512 | G | A | 5  | 12 | --        | --           |
| CakTC34866 | Ca(ICCV2/PI489777)SNP_35228 | 209  | G | C | 3  | 4  | --        | --           |
|            | Ca(ICCV2/PI489777)SNP_35229 | 2119 | G | C | 5  | 5  | --        | --           |
|            | Ca(ICCV2/PI489777)SNP_35230 | 2210 | C | A | 4  | 5  | --        | --           |
| CakTC24629 | Ca(ICCV2/PI489777)SNP_35231 | 157  | T | C | 6  | 3  | --        | Pseudo_ARR-B |
|            | Ca(ICCV2/PI489777)SNP_35232 | 345  | G | A | 4  | 3  | --        | Pseudo_ARR-B |
|            | Ca(ICCV2/PI489777)SNP_35233 | 435  | T | A | 5  | 3  | --        | Pseudo_ARR-B |
|            | Ca(ICCV2/PI489777)SNP_35234 | 1071 | T | C | 8  | 4  | --        | Pseudo_ARR-B |
|            | Ca(ICCV2/PI489777)SNP_35235 | 1760 | A | G | 14 | 9  | --        | Pseudo_ARR-B |
| CakTC10902 | Ca(ICCV2/PI489777)SNP_35236 | 376  | T | C | 3  | 6  | --        | --           |
|            | Ca(ICCV2/PI489777)SNP_35237 | 1165 | A | G | 4  | 3  | --        | --           |
|            | Ca(ICCV2/PI489777)SNP_35238 | 2125 | A | G | 6  | 7  | --        | --           |
|            | Ca(ICCV2/PI489777)SNP_35239 | 2128 | T | A | 7  | 7  | --        | --           |
|            | Ca(ICCV2/PI489777)SNP_35240 | 2154 | G | A | 8  | 7  | --        | --           |
|            | Ca(ICCV2/PI489777)SNP_35241 | 2173 | T | A | 11 | 6  | --        | --           |
|            | Ca(ICCV2/PI489777)SNP_35242 | 2245 | T | A | 10 | 5  | --        | --           |
| CakTC05735 | Ca(ICCV2/PI489777)SNP_35243 | 251  | C | A | 13 | 9  | --        | --           |
|            | Ca(ICCV2/PI489777)SNP_35244 | 265  | A | T | 13 | 11 | --        | --           |
|            | Ca(ICCV2/PI489777)SNP_35245 | 268  | C | A | 13 | 11 | --        | --           |
|            | Ca(ICCV2/PI489777)SNP_35246 | 389  | A | C | 14 | 11 | --        | --           |
|            | Ca(ICCV2/PI489777)SNP_35247 | 908  | C | T | 19 | 3  | --        | --           |
|            | Ca(ICCV2/PI489777)SNP_35248 | 1565 | G | A | 9  | 3  | --        | --           |
| CakTC28023 | Ca(ICCV2/PI489777)SNP_35249 | 15   | C | T | 5  | 3  | --        | --           |
| CakTC36503 | Ca(ICCV2/PI489777)SNP_35250 | 403  | A | T | 4  | 3  | --        | bHLH         |
| CakTC32826 | Ca(ICCV2/PI489777)SNP_35251 | 220  | G | A | 3  | 5  | --        | --           |
| CakTC10945 | Ca(ICCV2/PI489777)SNP_35252 | 43   | G | C | 5  | 6  | --        | --           |
|            | Ca(ICCV2/PI489777)SNP_35253 | 266  | G | A | 7  | 15 | --        | --           |
|            | Ca(ICCV2/PI489777)SNP_35254 | 361  | T | C | 6  | 15 | --        | --           |
| CakTC30848 | Ca(ICCV2/PI489777)SNP_35255 | 1060 | G | C | 5  | 13 | --        | --           |
|            | Ca(ICCV2/PI489777)SNP_35256 | 1287 | C | T | 9  | 10 | --        | --           |
| CakTC11459 | Ca(ICCV2/PI489777)SNP_35257 | 395  | G | C | 11 | 3  | --        | TPR          |
|            | Ca(ICCV2/PI489777)SNP_35258 | 473  | C | G | 11 | 4  | --        | TPR          |
|            | Ca(ICCV2/PI489777)SNP_35259 | 533  | C | T | 8  | 4  | --        | TPR          |
|            | Ca(ICCV2/PI489777)SNP_35260 | 1036 | A | G | 13 | 5  | --        | TPR          |
| CakTC41394 | Ca(ICCV2/PI489777)SNP_35261 | 901  | A | G | 21 | 14 | --        | --           |
|            | Ca(ICCV2/PI489777)SNP_35262 | 919  | A | T | 19 | 14 | --        | --           |
|            | Ca(ICCV2/PI489777)SNP_35263 | 1048 | T | A | 12 | 7  | --        | --           |
|            | Ca(ICCV2/PI489777)SNP_35264 | 1360 | G | A | 26 | 12 | --        | --           |
|            | Ca(ICCV2/PI489777)SNP_35265 | 1405 | G | A | 23 | 14 | --        | --           |
|            | Ca(ICCV2/PI489777)SNP_35266 | 1627 | T | C | 21 | 17 | --        | --           |
| CakTC40844 | Ca(ICCV2/PI489777)SNP_35267 | 162  | A | T | 19 | 13 | --        | --           |
|            | Ca(ICCV2/PI489777)SNP_35268 | 285  | T | G | 26 | 18 | --        | --           |
|            | Ca(ICCV2/PI489777)SNP_35269 | 435  | C | T | 23 | 20 | --        | --           |
|            | Ca(ICCV2/PI489777)SNP_35270 | 1058 | G | A | 29 | 36 | --        | --           |
|            | Ca(ICCV2/PI489777)SNP_35271 | 1657 | G | A | 24 | 9  | --        | --           |
|            | Ca(ICCV2/PI489777)SNP_35272 | 1723 | G | T | 21 | 4  | --        | --           |
| CakTC35389 | Ca(ICCV2/PI489777)SNP_35273 | 2515 | T | C | 7  | 3  | --        | --           |
| CakTC29163 | Ca(ICCV2/PI489777)SNP_35274 | 2261 | A | C | 4  | 4  | --        | FAR1         |
| CakTC25052 | Ca(ICCV2/PI489777)SNP_35275 | 1242 | C | T | 9  | 3  | --        | LUG          |
|            | Ca(ICCV2/PI489777)SNP_35276 | 2563 | T | C | 10 | 5  | --        | LUG          |
| CakTC26410 | Ca(ICCV2/PI489777)SNP_35277 | 113  | T | C | 10 | 7  | --        | --           |
|            | Ca(ICCV2/PI489777)SNP_35278 | 119  | A | C | 10 | 8  | --        | --           |
|            | Ca(ICCV2/PI489777)SNP_35279 | 233  | G | T | 13 | 7  | --        | --           |
|            | Ca(ICCV2/PI489777)SNP_35280 | 400  | A | G | 14 | 8  | --        | --           |
|            | Ca(ICCV2/PI489777)SNP_35281 | 690  | C | T | 27 | 19 | --        | --           |
|            | Ca(ICCV2/PI489777)SNP_35282 | 738  | T | C | 30 | 18 | --        | --           |
|            | Ca(ICCV2/PI489777)SNP_35283 | 1102 | C | T | 26 | 8  | --        | --           |
|            | Ca(ICCV2/PI489777)SNP_35284 | 1788 | A | G | 21 | 5  | --        | --           |
|            | Ca(ICCV2/PI489777)SNP_35285 | 1896 | G | A | 17 | 7  | --        | --           |
|            | Ca(ICCV2/PI489777)SNP_35286 | 1917 | C | T | 17 | 10 | --        | --           |
|            | Ca(ICCV2/PI489777)SNP_35287 | 2090 | A | G | 30 | 10 | --        | --           |
|            | Ca(ICCV2/PI489777)SNP_35288 | 2111 | A | T | 30 | 11 | --        | --           |
|            | Ca(ICCV2/PI489777)SNP_35289 | 2299 | A | T | 21 | 7  | --        | --           |
|            | Ca(ICCV2/PI489777)SNP_35290 | 2301 | T | G | 24 | 7  | --        | --           |
|            | Ca(ICCV2/PI489777)SNP_35291 | 2357 | A | G | 19 | 6  | --        | --           |
| CakTC26884 | Ca(ICCV2/PI489777)SNP_35292 | 2839 | G | A | 4  | 3  | --        | --           |
|            | Ca(ICCV2/PI489777)SNP_35293 | 5607 | C | T | 24 | 3  | --        | --           |

|            |                            |      |   |   |     |    |        |      |
|------------|----------------------------|------|---|---|-----|----|--------|------|
|            | Ca(ICC2/P1489777)SNP_35294 | 5952 | T | C | 6   | 12 | --     | --   |
|            | Ca(ICC2/P1489777)SNP_35295 | 6033 | T | A | 5   | 13 | --     | --   |
|            | Ca(ICC2/P1489777)SNP_35296 | 6345 | T | C | 8   | 12 | --     | --   |
| CakTC40008 | Ca(ICC2/P1489777)SNP_35297 | 873  | G | A | 6   | 6  | --     | --   |
| CakTC40852 | Ca(ICC2/P1489777)SNP_35298 | 243  | C | T | 24  | 15 | --     | --   |
|            | Ca(ICC2/P1489777)SNP_35299 | 260  | C | A | 22  | 15 | --     | --   |
|            | Ca(ICC2/P1489777)SNP_35300 | 261  | C | T | 22  | 16 | --     | --   |
|            | Ca(ICC2/P1489777)SNP_35301 | 1221 | G | C | 43  | 16 | --     | --   |
|            | Ca(ICC2/P1489777)SNP_35302 | 1597 | G | A | 11  | 20 | --     | --   |
| CakTC24870 | Ca(ICC2/P1489777)SNP_35303 | 373  | T | C | 52  | 71 | --     | --   |
|            | Ca(ICC2/P1489777)SNP_35304 | 804  | A | C | 77  | 63 | --     | --   |
|            | Ca(ICC2/P1489777)SNP_35305 | 878  | C | T | 68  | 36 | --     | --   |
|            | Ca(ICC2/P1489777)SNP_35306 | 1106 | A | G | 38  | 18 | --     | --   |
|            | Ca(ICC2/P1489777)SNP_35307 | 1147 | A | T | 31  | 16 | --     | --   |
| CakTC30629 | Ca(ICC2/P1489777)SNP_35308 | 275  | T | C | 3   | 5  | --     | --   |
|            | Ca(ICC2/P1489777)SNP_35309 | 353  | C | T | 4   | 5  | --     | --   |
|            | Ca(ICC2/P1489777)SNP_35310 | 548  | A | G | 6   | 6  | --     | --   |
|            | Ca(ICC2/P1489777)SNP_35311 | 587  | A | G | 6   | 6  | --     | --   |
| CakTC10448 | Ca(ICC2/P1489777)SNP_35312 | 999  | C | T | 8   | 6  | --     | --   |
|            | Ca(ICC2/P1489777)SNP_35313 | 1041 | G | A | 9   | 6  | --     | --   |
|            | Ca(ICC2/P1489777)SNP_35314 | 1305 | A | G | 9   | 6  | --     | --   |
| CakTC42520 | Ca(ICC2/P1489777)SNP_35315 | 476  | T | C | 7   | 13 | --     | --   |
| CakTC23495 | Ca(ICC2/P1489777)SNP_35316 | 42   | G | A | 8   | 3  | --     | --   |
| CakTC38245 | Ca(ICC2/P1489777)SNP_35317 | 381  | G | A | 48  | 20 | --     | --   |
|            | Ca(ICC2/P1489777)SNP_35318 | 909  | T | C | 18  | 16 | --     | --   |
|            | Ca(ICC2/P1489777)SNP_35319 | 986  | A | C | 10  | 10 | --     | --   |
|            | Ca(ICC2/P1489777)SNP_35320 | 993  | A | G | 12  | 8  | --     | --   |
| CakTC22894 | Ca(ICC2/P1489777)SNP_35321 | 98   | A | G | 5   | 3  | Flower | bud  |
|            | Ca(ICC2/P1489777)SNP_35322 | 374  | T | A | 4   | 7  | Flower | bud  |
| CakTC07539 | Ca(ICC2/P1489777)SNP_35323 | 247  | T | C | 5   | 5  | --     | --   |
| CakTC29921 | Ca(ICC2/P1489777)SNP_35324 | 377  | A | C | 23  | 9  | --     | GRAS |
|            | Ca(ICC2/P1489777)SNP_35325 | 378  | C | A | 23  | 9  | --     | GRAS |
|            | Ca(ICC2/P1489777)SNP_35326 | 451  | C | T | 24  | 8  | --     | GRAS |
|            | Ca(ICC2/P1489777)SNP_35327 | 453  | A | G | 19  | 9  | --     | GRAS |
|            | Ca(ICC2/P1489777)SNP_35328 | 601  | C | G | 25  | 11 | --     | GRAS |
|            | Ca(ICC2/P1489777)SNP_35329 | 606  | C | A | 25  | 8  | --     | GRAS |
|            | Ca(ICC2/P1489777)SNP_35330 | 663  | A | T | 20  | 10 | --     | GRAS |
|            | Ca(ICC2/P1489777)SNP_35331 | 1005 | G | A | 29  | 8  | --     | GRAS |
|            | Ca(ICC2/P1489777)SNP_35332 | 1131 | T | C | 31  | 11 | --     | GRAS |
|            | Ca(ICC2/P1489777)SNP_35333 | 1488 | C | T | 24  | 10 | --     | GRAS |
|            | Ca(ICC2/P1489777)SNP_35334 | 1554 | A | C | 29  | 15 | --     | GRAS |
| CakTC14270 | Ca(ICC2/P1489777)SNP_35335 | 378  | G | A | 3   | 4  | --     | --   |
|            | Ca(ICC2/P1489777)SNP_35336 | 393  | T | C | 3   | 4  | --     | --   |
|            | Ca(ICC2/P1489777)SNP_35337 | 469  | T | A | 3   | 4  | --     | --   |
| CakTC30604 | Ca(ICC2/P1489777)SNP_35338 | 2593 | G | A | 10  | 4  | Shoot  | --   |
| CakTC24047 | Ca(ICC2/P1489777)SNP_35339 | 1036 | A | G | 39  | 8  | --     | --   |
| CakTC30774 | Ca(ICC2/P1489777)SNP_35340 | 358  | C | G | 4   | 7  | --     | --   |
|            | Ca(ICC2/P1489777)SNP_35341 | 468  | C | G | 3   | 7  | --     | --   |
|            | Ca(ICC2/P1489777)SNP_35342 | 987  | T | A | 5   | 4  | --     | --   |
|            | Ca(ICC2/P1489777)SNP_35343 | 990  | T | C | 5   | 4  | --     | --   |
|            | Ca(ICC2/P1489777)SNP_35344 | 1065 | C | A | 4   | 7  | --     | --   |
|            | Ca(ICC2/P1489777)SNP_35345 | 1182 | A | G | 3   | 8  | --     | --   |
| CakTC24458 | Ca(ICC2/P1489777)SNP_35346 | 256  | T | C | 115 | 48 | --     | --   |
|            | Ca(ICC2/P1489777)SNP_35347 | 262  | T | C | 114 | 46 | --     | --   |
|            | Ca(ICC2/P1489777)SNP_35348 | 817  | C | G | 30  | 22 | --     | --   |
| CakTC20177 | Ca(ICC2/P1489777)SNP_35349 | 185  | A | T | 3   | 3  | --     | --   |
|            | Ca(ICC2/P1489777)SNP_35350 | 242  | C | T | 3   | 4  | --     | --   |
|            | Ca(ICC2/P1489777)SNP_35351 | 244  | G | A | 3   | 4  | --     | --   |
|            | Ca(ICC2/P1489777)SNP_35352 | 265  | G | A | 3   | 4  | --     | --   |
|            | Ca(ICC2/P1489777)SNP_35353 | 268  | C | A | 3   | 3  | --     | --   |
|            | Ca(ICC2/P1489777)SNP_35354 | 291  | T | A | 3   | 4  | --     | --   |
|            | Ca(ICC2/P1489777)SNP_35355 | 296  | C | T | 3   | 4  | --     | --   |
|            | Ca(ICC2/P1489777)SNP_35356 | 301  | C | G | 4   | 4  | --     | --   |
|            | Ca(ICC2/P1489777)SNP_35357 | 311  | G | T | 4   | 3  | --     | --   |
|            | Ca(ICC2/P1489777)SNP_35358 | 324  | C | A | 4   | 4  | --     | --   |
|            | Ca(ICC2/P1489777)SNP_35359 | 336  | C | A | 4   | 4  | --     | --   |
|            | Ca(ICC2/P1489777)SNP_35360 | 346  | A | G | 4   | 4  | --     | --   |
|            | Ca(ICC2/P1489777)SNP_35361 | 386  | G | T | 4   | 4  | --     | --   |
|            | Ca(ICC2/P1489777)SNP_35362 | 392  | C | T | 4   | 4  | --     | --   |
|            | Ca(ICC2/P1489777)SNP_35363 | 399  | C | T | 4   | 4  | --     | --   |
|            | Ca(ICC2/P1489777)SNP_35364 | 404  | G | T | 4   | 4  | --     | --   |
|            | Ca(ICC2/P1489777)SNP_35365 | 429  | C | A | 4   | 4  | --     | --   |
|            | Ca(ICC2/P1489777)SNP_35366 | 461  | G | A | 4   | 4  | --     | --   |
|            | Ca(ICC2/P1489777)SNP_35367 | 469  | C | T | 4   | 4  | --     | --   |

|            |                            |      |   |   |    |    |        |      |
|------------|----------------------------|------|---|---|----|----|--------|------|
|            | Ca(ICC2/PI489777)SNP_35368 | 493  | G | A | 3  | 4  | --     | --   |
| CakTC27085 | Ca(ICC2/PI489777)SNP_35369 | 258  | G | A | 7  | 3  | --     | --   |
| CakTC42203 | Ca(ICC2/PI489777)SNP_35370 | 243  | G | T | 4  | 3  | --     | --   |
|            | Ca(ICC2/PI489777)SNP_35371 | 1183 | A | T | 10 | 6  | --     | --   |
|            | Ca(ICC2/PI489777)SNP_35372 | 1342 | G | T | 11 | 6  | --     | --   |
|            | Ca(ICC2/PI489777)SNP_35373 | 1404 | A | G | 12 | 5  | --     | --   |
|            | Ca(ICC2/PI489777)SNP_35374 | 1590 | C | T | 8  | 3  | --     | --   |
|            | Ca(ICC2/PI489777)SNP_35375 | 1591 | A | G | 8  | 4  | --     | --   |
| CakTC10486 | Ca(ICC2/PI489777)SNP_35376 | 389  | A | G | 3  | 15 | --     | --   |
|            | Ca(ICC2/PI489777)SNP_35377 | 410  | T | G | 3  | 15 | --     | --   |
|            | Ca(ICC2/PI489777)SNP_35378 | 430  | G | A | 4  | 15 | --     | --   |
| CakTC37808 | Ca(ICC2/PI489777)SNP_35379 | 1040 | T | C | 7  | 8  | --     | --   |
|            | Ca(ICC2/PI489777)SNP_35380 | 1052 | C | T | 6  | 9  | --     | --   |
| CakTC30829 | Ca(ICC2/PI489777)SNP_35381 | 771  | T | C | 4  | 9  | --     | --   |
| CakTC41235 | Ca(ICC2/PI489777)SNP_35382 | 698  | A | G | 18 | 5  | --     | --   |
|            | Ca(ICC2/PI489777)SNP_35383 | 1475 | G | A | 29 | 7  | --     | --   |
|            | Ca(ICC2/PI489777)SNP_35384 | 1674 | T | G | 43 | 9  | --     | --   |
|            | Ca(ICC2/PI489777)SNP_35385 | 1749 | G | C | 42 | 10 | --     | --   |
|            | Ca(ICC2/PI489777)SNP_35386 | 1784 | A | G | 38 | 8  | --     | --   |
|            | Ca(ICC2/PI489777)SNP_35387 | 1826 | T | C | 37 | 6  | --     | --   |
|            | Ca(ICC2/PI489777)SNP_35388 | 2076 | A | G | 21 | 5  | --     | --   |
|            | Ca(ICC2/PI489777)SNP_35389 | 2162 | T | C | 22 | 4  | --     | --   |
|            | Ca(ICC2/PI489777)SNP_35390 | 2374 | T | G | 19 | 5  | --     | --   |
| CakTC23957 | Ca(ICC2/PI489777)SNP_35391 | 595  | A | G | 45 | 20 | Flower | bud  |
| CakTC25038 | Ca(ICC2/PI489777)SNP_35392 | 300  | T | C | 10 | 5  | --     | WRKY |
| CakTC03897 | Ca(ICC2/PI489777)SNP_35393 | 427  | A | G | 9  | 5  | --     | GRAS |
|            | Ca(ICC2/PI489777)SNP_35394 | 790  | C | T | 12 | 5  | --     | GRAS |
|            | Ca(ICC2/PI489777)SNP_35395 | 1009 | T | C | 9  | 4  | --     | GRAS |
|            | Ca(ICC2/PI489777)SNP_35396 | 1461 | C | A | 9  | 5  | --     | GRAS |
|            | Ca(ICC2/PI489777)SNP_35397 | 1575 | C | T | 9  | 5  | --     | GRAS |
|            | Ca(ICC2/PI489777)SNP_35398 | 1624 | T | C | 8  | 5  | --     | GRAS |
|            | Ca(ICC2/PI489777)SNP_35399 | 1648 | G | A | 9  | 6  | --     | GRAS |
|            | Ca(ICC2/PI489777)SNP_35400 | 1796 | A | C | 10 | 3  | --     | GRAS |
| CakTC23096 | Ca(ICC2/PI489777)SNP_35401 | 220  | T | C | 6  | 3  | --     | --   |
|            | Ca(ICC2/PI489777)SNP_35402 | 700  | A | G | 19 | 7  | --     | --   |
|            | Ca(ICC2/PI489777)SNP_35403 | 912  | A | T | 10 | 5  | --     | --   |
|            | Ca(ICC2/PI489777)SNP_35404 | 1185 | T | C | 17 | 5  | --     | --   |
|            | Ca(ICC2/PI489777)SNP_35405 | 1463 | G | A | 17 | 4  | --     | --   |
|            | Ca(ICC2/PI489777)SNP_35406 | 1717 | G | A | 9  | 3  | --     | --   |
| CakTC10406 | Ca(ICC2/PI489777)SNP_35407 | 2011 | T | G | 8  | 3  | --     | --   |
|            | Ca(ICC2/PI489777)SNP_35408 | 2029 | C | T | 7  | 3  | --     | --   |
|            | Ca(ICC2/PI489777)SNP_35409 | 2131 | C | T | 9  | 3  | --     | --   |
| CakTC39390 | Ca(ICC2/PI489777)SNP_35410 | 204  | T | A | 3  | 3  | --     | --   |
|            | Ca(ICC2/PI489777)SNP_35411 | 1159 | T | C | 10 | 4  | --     | --   |
| CakTC42568 | Ca(ICC2/PI489777)SNP_35412 | 209  | G | T | 3  | 4  | --     | --   |
|            | Ca(ICC2/PI489777)SNP_35413 | 1061 | A | C | 7  | 4  | --     | --   |
| CakTC25166 | Ca(ICC2/PI489777)SNP_35414 | 545  | A | G | 3  | 3  | --     | --   |
|            | Ca(ICC2/PI489777)SNP_35415 | 896  | A | G | 9  | 8  | --     | --   |
|            | Ca(ICC2/PI489777)SNP_35416 | 1088 | T | A | 9  | 9  | --     | --   |
|            | Ca(ICC2/PI489777)SNP_35417 | 1117 | C | T | 7  | 8  | --     | --   |
|            | Ca(ICC2/PI489777)SNP_35418 | 1302 | G | C | 4  | 4  | --     | --   |
|            | Ca(ICC2/PI489777)SNP_35419 | 1346 | C | A | 4  | 3  | --     | --   |
| CakTC27441 | Ca(ICC2/PI489777)SNP_35420 | 240  | C | T | 35 | 11 | --     | --   |
|            | Ca(ICC2/PI489777)SNP_35421 | 313  | A | T | 43 | 12 | --     | --   |
|            | Ca(ICC2/PI489777)SNP_35422 | 316  | C | T | 42 | 12 | --     | --   |
|            | Ca(ICC2/PI489777)SNP_35423 | 355  | T | A | 43 | 12 | --     | --   |
|            | Ca(ICC2/PI489777)SNP_35424 | 937  | C | T | 45 | 7  | --     | --   |
|            | Ca(ICC2/PI489777)SNP_35425 | 1101 | T | C | 34 | 10 | --     | --   |
|            | Ca(ICC2/PI489777)SNP_35426 | 1297 | C | T | 10 | 5  | --     | --   |
| CakTC08107 | Ca(ICC2/PI489777)SNP_35427 | 690  | T | C | 3  | 7  | --     | --   |
| CakTC09231 | Ca(ICC2/PI489777)SNP_35428 | 1110 | A | G | 7  | 6  | --     | --   |
|            | Ca(ICC2/PI489777)SNP_35429 | 1122 | A | T | 7  | 5  | --     | --   |
| CakTC38257 | Ca(ICC2/PI489777)SNP_35430 | 68   | C | T | 8  | 9  | --     | --   |
|            | Ca(ICC2/PI489777)SNP_35431 | 181  | A | C | 14 | 7  | --     | --   |
|            | Ca(ICC2/PI489777)SNP_35432 | 422  | A | G | 27 | 10 | --     | --   |
|            | Ca(ICC2/PI489777)SNP_35433 | 489  | G | A | 28 | 7  | --     | --   |
|            | Ca(ICC2/PI489777)SNP_35434 | 592  | A | C | 42 | 7  | --     | --   |
|            | Ca(ICC2/PI489777)SNP_35435 | 593  | C | A | 48 | 7  | --     | --   |
|            | Ca(ICC2/PI489777)SNP_35436 | 626  | G | A | 39 | 6  | --     | --   |
|            | Ca(ICC2/PI489777)SNP_35437 | 686  | T | C | 53 | 6  | --     | --   |
| CakTC29734 | Ca(ICC2/PI489777)SNP_35438 | 1019 | T | A | 39 | 3  | --     | --   |
| CakTC29032 | Ca(ICC2/PI489777)SNP_35439 | 574  | A | C | 11 | 5  | --     | --   |
|            | Ca(ICC2/PI489777)SNP_35440 | 630  | G | A | 13 | 5  | --     | --   |
|            | Ca(ICC2/PI489777)SNP_35441 | 825  | C | A | 13 | 6  | --     | --   |

|            |                            |      |   |   |     |    |       |      |
|------------|----------------------------|------|---|---|-----|----|-------|------|
|            | Ca(ICC2/PI489777)SNP_35442 | 1212 | C | T | 31  | 6  | --    | --   |
|            | Ca(ICC2/PI489777)SNP_35443 | 1422 | A | G | 28  | 5  | --    | --   |
| CakTC24749 | Ca(ICC2/PI489777)SNP_35444 | 1002 | A | C | 112 | 42 | --    | --   |
|            | Ca(ICC2/PI489777)SNP_35445 | 1132 | A | G | 114 | 57 | --    | --   |
| CakTC41386 | Ca(ICC2/PI489777)SNP_35446 | 304  | G | T | 16  | 3  | --    | --   |
|            | Ca(ICC2/PI489777)SNP_35447 | 327  | A | G | 15  | 3  | --    | --   |
|            | Ca(ICC2/PI489777)SNP_35448 | 366  | C | T | 15  | 3  | --    | --   |
|            | Ca(ICC2/PI489777)SNP_35449 | 383  | A | C | 18  | 4  | --    | --   |
|            | Ca(ICC2/PI489777)SNP_35450 | 482  | T | A | 20  | 5  | --    | --   |
|            | Ca(ICC2/PI489777)SNP_35451 | 485  | A | T | 20  | 4  | --    | --   |
|            | Ca(ICC2/PI489777)SNP_35452 | 497  | T | A | 19  | 5  | --    | --   |
|            | Ca(ICC2/PI489777)SNP_35453 | 597  | A | G | 21  | 6  | --    | --   |
|            | Ca(ICC2/PI489777)SNP_35454 | 892  | T | C | 34  | 9  | --    | --   |
|            | Ca(ICC2/PI489777)SNP_35455 | 1382 | G | C | 16  | 3  | --    | --   |
|            | Ca(ICC2/PI489777)SNP_35456 | 1443 | G | A | 19  | 3  | --    | --   |
|            | Ca(ICC2/PI489777)SNP_35457 | 1551 | T | C | 9   | 3  | --    | --   |
|            | Ca(ICC2/PI489777)SNP_35458 | 1933 | G | A | 34  | 6  | --    | --   |
| CakTC09712 | Ca(ICC2/PI489777)SNP_35459 | 514  | C | T | 4   | 3  | --    | --   |
| CakTC42920 | Ca(ICC2/PI489777)SNP_35460 | 516  | T | A | 14  | 3  | --    | --   |
|            | Ca(ICC2/PI489777)SNP_35461 | 654  | G | A | 8   | 5  | --    | --   |
|            | Ca(ICC2/PI489777)SNP_35462 | 1545 | T | G | 10  | 18 | --    | --   |
| CakTC43144 | Ca(ICC2/PI489777)SNP_35463 | 111  | A | G | 3   | 4  | --    | --   |
| CakTC37466 | Ca(ICC2/PI489777)SNP_35464 | 44   | C | A | 7   | 8  | --    | --   |
|            | Ca(ICC2/PI489777)SNP_35465 | 999  | C | T | 17  | 11 | --    | --   |
|            | Ca(ICC2/PI489777)SNP_35466 | 1075 | A | G | 14  | 14 | --    | --   |
|            | Ca(ICC2/PI489777)SNP_35467 | 1078 | A | G | 15  | 14 | --    | --   |
|            | Ca(ICC2/PI489777)SNP_35468 | 1444 | A | C | 9   | 15 | --    | --   |
|            | Ca(ICC2/PI489777)SNP_35469 | 1465 | T | C | 8   | 14 | --    | --   |
| CakTC40972 | Ca(ICC2/PI489777)SNP_35470 | 592  | T | C | 23  | 6  | --    | --   |
| CakTC24078 | Ca(ICC2/PI489777)SNP_35471 | 182  | A | G | 11  | 4  | --    | --   |
|            | Ca(ICC2/PI489777)SNP_35472 | 426  | T | C | 19  | 5  | --    | --   |
|            | Ca(ICC2/PI489777)SNP_35473 | 459  | G | T | 19  | 4  | --    | --   |
|            | Ca(ICC2/PI489777)SNP_35474 | 525  | A | G | 13  | 4  | --    | --   |
|            | Ca(ICC2/PI489777)SNP_35475 | 567  | T | C | 13  | 7  | --    | --   |
|            | Ca(ICC2/PI489777)SNP_35476 | 709  | G | A | 10  | 9  | --    | --   |
|            | Ca(ICC2/PI489777)SNP_35477 | 736  | A | C | 8   | 7  | --    | --   |
|            | Ca(ICC2/PI489777)SNP_35478 | 757  | G | A | 9   | 9  | --    | --   |
| CakTC23304 | Ca(ICC2/PI489777)SNP_35479 | 1597 | T | C | 143 | 45 | --    | --   |
| CakTC30877 | Ca(ICC2/PI489777)SNP_35480 | 1356 | G | A | 5   | 3  | --    | --   |
| CakTC41319 | Ca(ICC2/PI489777)SNP_35481 | 271  | C | G | 33  | 7  | --    | --   |
|            | Ca(ICC2/PI489777)SNP_35482 | 370  | C | G | 45  | 7  | --    | --   |
|            | Ca(ICC2/PI489777)SNP_35483 | 876  | A | G | 45  | 11 | --    | --   |
|            | Ca(ICC2/PI489777)SNP_35484 | 889  | C | T | 45  | 9  | --    | --   |
|            | Ca(ICC2/PI489777)SNP_35485 | 997  | C | T | 50  | 11 | --    | --   |
|            | Ca(ICC2/PI489777)SNP_35486 | 1939 | A | G | 58  | 13 | --    | --   |
|            | Ca(ICC2/PI489777)SNP_35487 | 2032 | C | G | 53  | 15 | --    | --   |
|            | Ca(ICC2/PI489777)SNP_35488 | 2252 | A | C | 54  | 11 | --    | --   |
|            | Ca(ICC2/PI489777)SNP_35489 | 2259 | A | G | 54  | 11 | --    | --   |
|            | Ca(ICC2/PI489777)SNP_35490 | 2297 | A | G | 32  | 11 | --    | --   |
|            | Ca(ICC2/PI489777)SNP_35491 | 2355 | C | T | 31  | 11 | --    | --   |
|            | Ca(ICC2/PI489777)SNP_35492 | 2563 | G | A | 3   | 4  | --    | --   |
| CakTC37426 | Ca(ICC2/PI489777)SNP_35493 | 108  | A | T | 14  | 4  | --    | --   |
|            | Ca(ICC2/PI489777)SNP_35494 | 110  | A | T | 14  | 4  | --    | --   |
|            | Ca(ICC2/PI489777)SNP_35495 | 135  | C | T | 16  | 4  | --    | --   |
|            | Ca(ICC2/PI489777)SNP_35496 | 340  | T | A | 20  | 5  | --    | --   |
|            | Ca(ICC2/PI489777)SNP_35497 | 361  | T | C | 20  | 6  | --    | --   |
|            | Ca(ICC2/PI489777)SNP_35498 | 447  | T | C | 20  | 4  | --    | --   |
|            | Ca(ICC2/PI489777)SNP_35499 | 760  | T | A | 17  | 6  | --    | --   |
|            | Ca(ICC2/PI489777)SNP_35500 | 976  | G | A | 15  | 7  | --    | --   |
| CakTC37590 | Ca(ICC2/PI489777)SNP_35501 | 233  | T | A | 8   | 3  | --    | WRKY |
|            | Ca(ICC2/PI489777)SNP_35502 | 519  | C | T | 10  | 4  | --    | WRKY |
|            | Ca(ICC2/PI489777)SNP_35503 | 752  | G | T | 6   | 5  | --    | WRKY |
|            | Ca(ICC2/PI489777)SNP_35504 | 990  | A | C | 6   | 4  | --    | WRKY |
|            | Ca(ICC2/PI489777)SNP_35505 | 995  | A | G | 5   | 4  | --    | WRKY |
|            | Ca(ICC2/PI489777)SNP_35506 | 1061 | C | G | 5   | 3  | --    | WRKY |
|            | Ca(ICC2/PI489777)SNP_35507 | 1097 | A | G | 5   | 3  | --    | WRKY |
|            | Ca(ICC2/PI489777)SNP_35508 | 1104 | T | C | 5   | 3  | --    | WRKY |
| CakTC30904 | Ca(ICC2/PI489777)SNP_35509 | 297  | T | C | 5   | 4  | Shoot | --   |
|            | Ca(ICC2/PI489777)SNP_35510 | 611  | T | C | 5   | 3  | Shoot | --   |
|            | Ca(ICC2/PI489777)SNP_35511 | 643  | C | T | 5   | 3  | Shoot | --   |
|            | Ca(ICC2/PI489777)SNP_35512 | 657  | A | C | 5   | 3  | Shoot | --   |
| CakTC40769 | Ca(ICC2/PI489777)SNP_35513 | 352  | T | G | 6   | 10 | --    | --   |
|            | Ca(ICC2/PI489777)SNP_35514 | 460  | G | T | 4   | 9  | --    | --   |
| CakTC40287 | Ca(ICC2/PI489777)SNP_35515 | 488  | C | G | 5   | 15 | --    | --   |



|            |                            |      |   |   |     |    |        |      |
|------------|----------------------------|------|---|---|-----|----|--------|------|
|            | Ca(ICC2/PI489777)SNP_35516 | 545  | C | T | 5   | 11 | --     | --   |
| CakTC37429 | Ca(ICC2/PI489777)SNP_35517 | 802  | A | C | 126 | 43 | --     | --   |
|            | Ca(ICC2/PI489777)SNP_35518 | 861  | G | A | 136 | 49 | --     | --   |
|            | Ca(ICC2/PI489777)SNP_35519 | 1054 | G | C | 96  | 40 | --     | --   |
|            | Ca(ICC2/PI489777)SNP_35520 | 1077 | A | C | 80  | 42 | --     | --   |
|            | Ca(ICC2/PI489777)SNP_35521 | 1510 | T | C | 12  | 11 | --     | --   |
|            | Ca(ICC2/PI489777)SNP_35522 | 1524 | T | C | 10  | 12 | --     | --   |
|            | Ca(ICC2/PI489777)SNP_35523 | 1554 | A | G | 10  | 4  | --     | --   |
|            | Ca(ICC2/PI489777)SNP_35524 | 1589 | C | T | 6   | 4  | --     | --   |
| CakTC11623 | Ca(ICC2/PI489777)SNP_35525 | 133  | C | T | 36  | 23 | --     | --   |
|            | Ca(ICC2/PI489777)SNP_35526 | 303  | C | T | 37  | 24 | --     | --   |
|            | Ca(ICC2/PI489777)SNP_35527 | 483  | A | C | 17  | 17 | --     | --   |
|            | Ca(ICC2/PI489777)SNP_35528 | 524  | T | C | 15  | 12 | --     | --   |
| CakTC38095 | Ca(ICC2/PI489777)SNP_35529 | 159  | C | G | 6   | 5  | Root   | --   |
|            | Ca(ICC2/PI489777)SNP_35530 | 210  | C | T | 6   | 4  | Root   | --   |
|            | Ca(ICC2/PI489777)SNP_35531 | 456  | A | G | 9   | 10 | Root   | --   |
|            | Ca(ICC2/PI489777)SNP_35532 | 765  | G | A | 20  | 19 | Root   | --   |
|            | Ca(ICC2/PI489777)SNP_35533 | 859  | C | T | 18  | 20 | Root   | --   |
|            | Ca(ICC2/PI489777)SNP_35534 | 866  | T | C | 20  | 22 | Root   | --   |
|            | Ca(ICC2/PI489777)SNP_35535 | 927  | G | A | 22  | 18 | Root   | --   |
| CakTC32942 | Ca(ICC2/PI489777)SNP_35536 | 181  | A | C | 31  | 9  | --     | --   |
|            | Ca(ICC2/PI489777)SNP_35537 | 326  | G | T | 35  | 7  | --     | --   |
| CakTC37441 | Ca(ICC2/PI489777)SNP_35538 | 242  | C | T | 8   | 3  | --     | --   |
|            | Ca(ICC2/PI489777)SNP_35539 | 253  | A | G | 8   | 3  | --     | --   |
|            | Ca(ICC2/PI489777)SNP_35540 | 266  | A | G | 9   | 3  | --     | --   |
|            | Ca(ICC2/PI489777)SNP_35541 | 272  | G | C | 8   | 3  | --     | --   |
|            | Ca(ICC2/PI489777)SNP_35542 | 493  | T | C | 16  | 9  | --     | --   |
|            | Ca(ICC2/PI489777)SNP_35543 | 910  | G | T | 6   | 4  | --     | --   |
| CakTC31427 | Ca(ICC2/PI489777)SNP_35544 | 295  | G | A | 29  | 25 | Root   | --   |
|            | Ca(ICC2/PI489777)SNP_35545 | 386  | C | T | 35  | 27 | Root   | --   |
|            | Ca(ICC2/PI489777)SNP_35546 | 411  | A | C | 35  | 21 | Root   | --   |
|            | Ca(ICC2/PI489777)SNP_35547 | 548  | G | C | 20  | 13 | Root   | --   |
|            | Ca(ICC2/PI489777)SNP_35548 | 651  | T | C | 26  | 19 | Root   | --   |
|            | Ca(ICC2/PI489777)SNP_35549 | 659  | A | T | 25  | 19 | Root   | --   |
| CakTC39133 | Ca(ICC2/PI489777)SNP_35550 | 671  | A | G | 3   | 8  | --     | --   |
| CakTC42619 | Ca(ICC2/PI489777)SNP_35551 | 215  | C | A | 8   | 3  | --     | --   |
| CakTC29364 | Ca(ICC2/PI489777)SNP_35552 | 961  | C | T | 5   | 3  | Flower | bud  |
| CakTC26667 | Ca(ICC2/PI489777)SNP_35553 | 1614 | C | T | 8   | 17 | --     | --   |
|            | Ca(ICC2/PI489777)SNP_35554 | 1647 | G | T | 11  | 21 | --     | --   |
|            | Ca(ICC2/PI489777)SNP_35555 | 1731 | G | A | 16  | 20 | --     | --   |
|            | Ca(ICC2/PI489777)SNP_35556 | 1776 | G | A | 16  | 23 | --     | --   |
|            | Ca(ICC2/PI489777)SNP_35557 | 2074 | G | A | 14  | 6  | --     | --   |
| CakTC27374 | Ca(ICC2/PI489777)SNP_35558 | 878  | T | A | 5   | 3  | --     | --   |
|            | Ca(ICC2/PI489777)SNP_35559 | 960  | A | C | 5   | 3  | --     | --   |
|            | Ca(ICC2/PI489777)SNP_35560 | 1067 | C | T | 3   | 9  | --     | --   |
|            | Ca(ICC2/PI489777)SNP_35561 | 1073 | T | A | 5   | 8  | --     | --   |
|            | Ca(ICC2/PI489777)SNP_35562 | 1136 | A | G | 6   | 7  | --     | --   |
|            | Ca(ICC2/PI489777)SNP_35563 | 1886 | T | G | 7   | 3  | --     | --   |
|            | Ca(ICC2/PI489777)SNP_35564 | 1976 | C | T | 5   | 3  | --     | --   |
|            | Ca(ICC2/PI489777)SNP_35565 | 2000 | C | A | 3   | 3  | --     | --   |
| CakTC37610 | Ca(ICC2/PI489777)SNP_35566 | 1075 | T | C | 13  | 5  | --     | --   |
|            | Ca(ICC2/PI489777)SNP_35567 | 1093 | T | C | 14  | 5  | --     | --   |
|            | Ca(ICC2/PI489777)SNP_35568 | 1154 | T | G | 14  | 4  | --     | --   |
|            | Ca(ICC2/PI489777)SNP_35569 | 1168 | T | C | 14  | 3  | --     | --   |
| CakTC27591 | Ca(ICC2/PI489777)SNP_35570 | 409  | G | A | 13  | 7  | --     | --   |
|            | Ca(ICC2/PI489777)SNP_35571 | 501  | G | A | 12  | 10 | --     | --   |
|            | Ca(ICC2/PI489777)SNP_35572 | 1024 | A | C | 4   | 5  | --     | --   |
| CakTC10534 | Ca(ICC2/PI489777)SNP_35573 | 76   | T | A | 25  | 15 | --     | --   |
| CakTC36727 | Ca(ICC2/PI489777)SNP_35574 | 1018 | T | C | 21  | 8  | --     | --   |
|            | Ca(ICC2/PI489777)SNP_35575 | 2352 | A | G | 8   | 6  | --     | --   |
| CakTC40270 | Ca(ICC2/PI489777)SNP_35576 | 363  | A | G | 4   | 5  | --     | --   |
|            | Ca(ICC2/PI489777)SNP_35577 | 393  | A | G | 9   | 4  | --     | --   |
|            | Ca(ICC2/PI489777)SNP_35578 | 489  | G | A | 12  | 4  | --     | --   |
|            | Ca(ICC2/PI489777)SNP_35579 | 532  | G | C | 15  | 4  | --     | --   |
|            | Ca(ICC2/PI489777)SNP_35580 | 534  | G | T | 14  | 4  | --     | --   |
|            | Ca(ICC2/PI489777)SNP_35581 | 1201 | G | A | 11  | 11 | --     | --   |
|            | Ca(ICC2/PI489777)SNP_35582 | 1416 | G | A | 4   | 12 | --     | --   |
| CakTC30537 | Ca(ICC2/PI489777)SNP_35583 | 1281 | A | G | 3   | 3  | Flower | bud  |
| CakTC39629 | Ca(ICC2/PI489777)SNP_35584 | 259  | T | G | 9   | 3  | --     | bHLH |
|            | Ca(ICC2/PI489777)SNP_35585 | 360  | A | G | 16  | 9  | --     | bHLH |
|            | Ca(ICC2/PI489777)SNP_35586 | 688  | C | T | 29  | 17 | --     | bHLH |
|            | Ca(ICC2/PI489777)SNP_35587 | 1147 | A | G | 21  | 9  | --     | bHLH |
|            | Ca(ICC2/PI489777)SNP_35588 | 1306 | T | C | 36  | 11 | --     | bHLH |
|            | Ca(ICC2/PI489777)SNP_35589 | 1330 | G | C | 36  | 14 | --     | bHLH |

|            |                            |      |   |   |    |    |        |          |
|------------|----------------------------|------|---|---|----|----|--------|----------|
|            | Ca(ICC2/P1489777)SNP_35590 | 1475 | A | C | 25 | 15 | --     | bHLH     |
|            | Ca(ICC2/P1489777)SNP_35591 | 1550 | T | A | 18 | 13 | --     | bHLH     |
| CakTC34891 | Ca(ICC2/P1489777)SNP_35592 | 1286 | G | A | 65 | 85 | --     | --       |
|            | Ca(ICC2/P1489777)SNP_35593 | 1556 | A | G | 57 | 73 | --     | --       |
| CakTC41163 | Ca(ICC2/P1489777)SNP_35594 | 549  | T | G | 5  | 9  | --     | --       |
|            | Ca(ICC2/P1489777)SNP_35595 | 668  | T | C | 8  | 10 | --     | --       |
|            | Ca(ICC2/P1489777)SNP_35596 | 671  | A | T | 8  | 10 | --     | --       |
|            | Ca(ICC2/P1489777)SNP_35597 | 1067 | T | C | 22 | 4  | --     | --       |
| CakTC30550 | Ca(ICC2/P1489777)SNP_35598 | 381  | C | A | 8  | 5  | --     | C2C2-Dof |
|            | Ca(ICC2/P1489777)SNP_35599 | 975  | G | T | 23 | 9  | --     | C2C2-Dof |
|            | Ca(ICC2/P1489777)SNP_35600 | 1276 | A | G | 8  | 4  | --     | C2C2-Dof |
| CakTC39659 | Ca(ICC2/P1489777)SNP_35601 | 734  | G | A | 25 | 19 | --     | --       |
|            | Ca(ICC2/P1489777)SNP_35602 | 1084 | C | T | 14 | 16 | --     | --       |
|            | Ca(ICC2/P1489777)SNP_35603 | 1097 | C | T | 14 | 16 | --     | --       |
|            | Ca(ICC2/P1489777)SNP_35604 | 1126 | C | T | 13 | 12 | --     | --       |
|            | Ca(ICC2/P1489777)SNP_35605 | 1169 | T | C | 13 | 13 | --     | --       |
| CakTC32782 | Ca(ICC2/P1489777)SNP_35606 | 2074 | G | A | 71 | 76 | --     | --       |
|            | Ca(ICC2/P1489777)SNP_35607 | 2435 | C | T | 70 | 97 | --     | --       |
| CakTC26719 | Ca(ICC2/P1489777)SNP_35608 | 1557 | T | C | 6  | 3  | --     | --       |
|            | Ca(ICC2/P1489777)SNP_35609 | 1812 | A | G | 4  | 16 | --     | --       |
|            | Ca(ICC2/P1489777)SNP_35610 | 1923 | A | T | 6  | 15 | --     | --       |
|            | Ca(ICC2/P1489777)SNP_35611 | 1953 | C | T | 6  | 14 | --     | --       |
|            | Ca(ICC2/P1489777)SNP_35612 | 2096 | T | C | 6  | 14 | --     | --       |
| CakTC28118 | Ca(ICC2/P1489777)SNP_35613 | 1407 | T | A | 15 | 3  | --     | --       |
| CakTC29846 | Ca(ICC2/P1489777)SNP_35614 | 694  | C | T | 13 | 3  | --     | --       |
| CakTC37328 | Ca(ICC2/P1489777)SNP_35615 | 1457 | C | G | 22 | 28 | --     | --       |
| CakTC35133 | Ca(ICC2/P1489777)SNP_35616 | 1107 | G | T | 13 | 5  | --     | --       |
|            | Ca(ICC2/P1489777)SNP_35617 | 1951 | G | A | 13 | 6  | --     | --       |
|            | Ca(ICC2/P1489777)SNP_35618 | 2189 | G | A | 12 | 7  | --     | --       |
|            | Ca(ICC2/P1489777)SNP_35619 | 2953 | C | T | 32 | 4  | --     | --       |
|            | Ca(ICC2/P1489777)SNP_35620 | 3085 | A | G | 18 | 3  | --     | --       |
|            | Ca(ICC2/P1489777)SNP_35621 | 3327 | C | T | 5  | 4  | --     | --       |
| CakTC23878 | Ca(ICC2/P1489777)SNP_35622 | 788  | T | C | 4  | 7  | --     | --       |
| CakTC22396 | Ca(ICC2/P1489777)SNP_35623 | 1428 | A | T | 7  | 7  | --     | --       |
|            | Ca(ICC2/P1489777)SNP_35624 | 2464 | A | C | 4  | 3  | --     | --       |
|            | Ca(ICC2/P1489777)SNP_35625 | 2466 | T | G | 4  | 3  | --     | --       |
| CakTC13627 | Ca(ICC2/P1489777)SNP_35626 | 158  | T | C | 5  | 3  | --     | --       |
| CakTC41750 | Ca(ICC2/P1489777)SNP_35627 | 227  | C | T | 36 | 13 | --     | --       |
|            | Ca(ICC2/P1489777)SNP_35628 | 560  | T | C | 19 | 12 | --     | --       |
|            | Ca(ICC2/P1489777)SNP_35629 | 2053 | T | C | 20 | 10 | --     | --       |
| CakTC33847 | Ca(ICC2/P1489777)SNP_35630 | 1308 | A | G | 13 | 4  | --     | ARID     |
|            | Ca(ICC2/P1489777)SNP_35631 | 2121 | G | A | 6  | 4  | --     | ARID     |
| CakTC12580 | Ca(ICC2/P1489777)SNP_35632 | 319  | C | T | 20 | 16 | --     | --       |
|            | Ca(ICC2/P1489777)SNP_35633 | 337  | C | T | 20 | 16 | --     | --       |
| CakTC42419 | Ca(ICC2/P1489777)SNP_35634 | 260  | A | G | 15 | 9  | Shoot  | --       |
|            | Ca(ICC2/P1489777)SNP_35635 | 594  | C | A | 7  | 5  | Shoot  | --       |
|            | Ca(ICC2/P1489777)SNP_35636 | 662  | T | C | 5  | 6  | Shoot  | --       |
|            | Ca(ICC2/P1489777)SNP_35637 | 755  | C | T | 6  | 4  | Shoot  | --       |
|            | Ca(ICC2/P1489777)SNP_35638 | 758  | G | C | 5  | 4  | Shoot  | --       |
|            | Ca(ICC2/P1489777)SNP_35639 | 862  | G | A | 3  | 4  | Shoot  | --       |
|            | Ca(ICC2/P1489777)SNP_35640 | 916  | A | G | 3  | 3  | Shoot  | --       |
| CakTC24977 | Ca(ICC2/P1489777)SNP_35641 | 740  | G | A | 12 | 3  | Flower | bud      |
|            | Ca(ICC2/P1489777)SNP_35642 | 3131 | A | C | 16 | 8  | Flower | bud      |
| CakTC41885 | Ca(ICC2/P1489777)SNP_35643 | 557  | A | G | 11 | 4  | --     | --       |
|            | Ca(ICC2/P1489777)SNP_35644 | 575  | A | T | 12 | 4  | --     | --       |
|            | Ca(ICC2/P1489777)SNP_35645 | 965  | A | G | 9  | 3  | --     | --       |
|            | Ca(ICC2/P1489777)SNP_35646 | 1886 | A | T | 11 | 3  | --     | --       |
| CakTC37708 | Ca(ICC2/P1489777)SNP_35647 | 549  | A | G | 21 | 8  | --     | --       |
|            | Ca(ICC2/P1489777)SNP_35648 | 1238 | G | A | 19 | 10 | --     | --       |
| CakTC33299 | Ca(ICC2/P1489777)SNP_35649 | 1542 | T | C | 3  | 3  | --     | --       |
| CakTC29512 | Ca(ICC2/P1489777)SNP_35650 | 364  | T | C | 23 | 29 | --     | --       |
|            | Ca(ICC2/P1489777)SNP_35651 | 475  | T | A | 20 | 28 | --     | --       |
| CakTC40656 | Ca(ICC2/P1489777)SNP_35652 | 162  | C | T | 8  | 4  | --     | --       |
|            | Ca(ICC2/P1489777)SNP_35653 | 172  | C | G | 8  | 4  | --     | --       |
|            | Ca(ICC2/P1489777)SNP_35654 | 191  | G | C | 9  | 4  | --     | --       |
|            | Ca(ICC2/P1489777)SNP_35655 | 301  | T | G | 11 | 3  | --     | --       |
| CakTC25654 | Ca(ICC2/P1489777)SNP_35656 | 572  | G | A | 18 | 3  | --     | --       |
|            | Ca(ICC2/P1489777)SNP_35657 | 769  | T | C | 18 | 5  | --     | --       |
|            | Ca(ICC2/P1489777)SNP_35658 | 1683 | T | C | 10 | 4  | --     | --       |
| CakTC26513 | Ca(ICC2/P1489777)SNP_35659 | 160  | G | C | 34 | 12 | --     | G2-like  |
|            | Ca(ICC2/P1489777)SNP_35660 | 217  | G | A | 45 | 12 | --     | G2-like  |
|            | Ca(ICC2/P1489777)SNP_35661 | 310  | A | G | 54 | 5  | --     | G2-like  |
|            | Ca(ICC2/P1489777)SNP_35662 | 485  | A | T | 43 | 17 | --     | G2-like  |
|            | Ca(ICC2/P1489777)SNP_35663 | 542  | T | G | 67 | 24 | --     | G2-like  |

|            |                             |      |   |   |     |     |        |         |
|------------|-----------------------------|------|---|---|-----|-----|--------|---------|
|            | Ca(ICCV2/PI489777)SNP_35664 | 630  | T | G | 77  | 25  | --     | G2-like |
|            | Ca(ICCV2/PI489777)SNP_35665 | 633  | C | A | 73  | 23  | --     | G2-like |
|            | Ca(ICCV2/PI489777)SNP_35666 | 943  | A | T | 130 | 57  | --     | G2-like |
|            | Ca(ICCV2/PI489777)SNP_35667 | 952  | A | T | 129 | 47  | --     | G2-like |
|            | Ca(ICCV2/PI489777)SNP_35668 | 961  | A | C | 120 | 66  | --     | G2-like |
|            | Ca(ICCV2/PI489777)SNP_35669 | 1107 | G | T | 155 | 67  | --     | G2-like |
|            | Ca(ICCV2/PI489777)SNP_35670 | 1139 | A | G | 154 | 70  | --     | G2-like |
|            | Ca(ICCV2/PI489777)SNP_35671 | 1183 | T | C | 145 | 54  | --     | G2-like |
|            | Ca(ICCV2/PI489777)SNP_35672 | 1470 | T | C | 102 | 46  | --     | G2-like |
|            | Ca(ICCV2/PI489777)SNP_35673 | 1744 | A | G | 67  | 34  | --     | G2-like |
|            | Ca(ICCV2/PI489777)SNP_35674 | 1909 | C | T | 18  | 8   | --     | G2-like |
| CakTC31176 | Ca(ICCV2/PI489777)SNP_35675 | 338  | T | A | 56  | 70  | --     | --      |
|            | Ca(ICCV2/PI489777)SNP_35676 | 374  | T | G | 67  | 80  | --     | --      |
|            | Ca(ICCV2/PI489777)SNP_35677 | 551  | A | G | 56  | 58  | --     | --      |
|            | Ca(ICCV2/PI489777)SNP_35678 | 626  | A | G | 49  | 44  | --     | --      |
| CakTC38178 | Ca(ICCV2/PI489777)SNP_35679 | 424  | G | A | 4   | 4   | --     | --      |
|            | Ca(ICCV2/PI489777)SNP_35680 | 657  | G | C | 4   | 7   | --     | --      |
| CakTC38337 | Ca(ICCV2/PI489777)SNP_35681 | 136  | C | G | 5   | 7   | --     | --      |
|            | Ca(ICCV2/PI489777)SNP_35682 | 780  | C | T | 5   | 4   | --     | --      |
|            | Ca(ICCV2/PI489777)SNP_35683 | 787  | T | C | 5   | 4   | --     | --      |
|            | Ca(ICCV2/PI489777)SNP_35684 | 939  | T | G | 4   | 4   | --     | --      |
| CakTC32455 | Ca(ICCV2/PI489777)SNP_35685 | 213  | G | A | 3   | 4   | Flower | bud     |
|            | Ca(ICCV2/PI489777)SNP_35686 | 250  | T | A | 6   | 4   | Flower | bud     |
|            | Ca(ICCV2/PI489777)SNP_35687 | 335  | C | T | 3   | 4   | Flower | bud     |
| CakTC23892 | Ca(ICCV2/PI489777)SNP_35688 | 200  | T | A | 296 | 142 | --     | --      |
|            | Ca(ICCV2/PI489777)SNP_35689 | 266  | C | T | 377 | 191 | --     | --      |
|            | Ca(ICCV2/PI489777)SNP_35690 | 413  | G | C | 373 | 231 | --     | --      |
|            | Ca(ICCV2/PI489777)SNP_35691 | 678  | T | C | 461 | 248 | --     | --      |
|            | Ca(ICCV2/PI489777)SNP_35692 | 1699 | A | T | 314 | 238 | --     | --      |
|            | Ca(ICCV2/PI489777)SNP_35693 | 1976 | T | A | 4   | 5   | --     | --      |
| CakTC32228 | Ca(ICCV2/PI489777)SNP_35694 | 799  | G | A | 4   | 4   | --     | --      |
| CakTC07684 | Ca(ICCV2/PI489777)SNP_35695 | 1521 | T | C | 4   | 6   | --     | --      |
| CakTC23905 | Ca(ICCV2/PI489777)SNP_35696 | 4523 | C | T | 8   | 4   | --     | --      |
| CakTC24942 | Ca(ICCV2/PI489777)SNP_35697 | 2013 | A | C | 15  | 7   | --     | TRAF    |
|            | Ca(ICCV2/PI489777)SNP_35698 | 2308 | A | G | 23  | 4   | --     | TRAF    |
|            | Ca(ICCV2/PI489777)SNP_35699 | 2348 | T | C | 20  | 5   | --     | TRAF    |
|            | Ca(ICCV2/PI489777)SNP_35700 | 2510 | C | A | 20  | 4   | --     | TRAF    |
| CakTC43092 | Ca(ICCV2/PI489777)SNP_35701 | 195  | A | G | 8   | 6   | --     | --      |
|            | Ca(ICCV2/PI489777)SNP_35702 | 362  | T | C | 22  | 17  | --     | --      |
|            | Ca(ICCV2/PI489777)SNP_35703 | 381  | G | T | 23  | 18  | --     | --      |
|            | Ca(ICCV2/PI489777)SNP_35704 | 390  | C | G | 22  | 18  | --     | --      |
|            | Ca(ICCV2/PI489777)SNP_35705 | 400  | G | A | 24  | 20  | --     | --      |
|            | Ca(ICCV2/PI489777)SNP_35706 | 433  | C | G | 28  | 21  | --     | --      |
|            | Ca(ICCV2/PI489777)SNP_35707 | 875  | T | C | 25  | 5   | --     | --      |
|            | Ca(ICCV2/PI489777)SNP_35708 | 890  | G | A | 16  | 5   | --     | --      |
| CakTC29240 | Ca(ICCV2/PI489777)SNP_35709 | 170  | A | C | 41  | 52  | --     | --      |
| CakTC32505 | Ca(ICCV2/PI489777)SNP_35710 | 294  | G | A | 29  | 8   | --     | --      |
|            | Ca(ICCV2/PI489777)SNP_35711 | 972  | G | A | 12  | 9   | --     | --      |
|            | Ca(ICCV2/PI489777)SNP_35712 | 1017 | C | T | 12  | 9   | --     | --      |
| CakTC33101 | Ca(ICCV2/PI489777)SNP_35713 | 392  | C | T | 13  | 6   | --     | --      |
|            | Ca(ICCV2/PI489777)SNP_35714 | 412  | A | G | 11  | 5   | --     | --      |
|            | Ca(ICCV2/PI489777)SNP_35715 | 604  | T | C | 32  | 12  | --     | --      |
|            | Ca(ICCV2/PI489777)SNP_35716 | 666  | T | G | 27  | 10  | --     | --      |
|            | Ca(ICCV2/PI489777)SNP_35717 | 696  | C | T | 28  | 9   | --     | --      |
|            | Ca(ICCV2/PI489777)SNP_35718 | 762  | C | T | 23  | 10  | --     | --      |
|            | Ca(ICCV2/PI489777)SNP_35719 | 1137 | G | A | 13  | 10  | --     | --      |
|            | Ca(ICCV2/PI489777)SNP_35720 | 1359 | T | C | 15  | 13  | --     | --      |
|            | Ca(ICCV2/PI489777)SNP_35721 | 1789 | T | C | 5   | 9   | --     | --      |
| CakTC40772 | Ca(ICCV2/PI489777)SNP_35722 | 445  | T | A | 16  | 9   | --     | --      |
|            | Ca(ICCV2/PI489777)SNP_35723 | 478  | T | C | 12  | 8   | --     | --      |
| CakTC43156 | Ca(ICCV2/PI489777)SNP_35724 | 732  | T | A | 22  | 30  | --     | --      |
| CakTC23565 | Ca(ICCV2/PI489777)SNP_35725 | 690  | C | T | 17  | 6   | --     | --      |
|            | Ca(ICCV2/PI489777)SNP_35726 | 1758 | C | T | 19  | 16  | --     | --      |
|            | Ca(ICCV2/PI489777)SNP_35727 | 2019 | C | T | 18  | 21  | --     | --      |
| CakTC39410 | Ca(ICCV2/PI489777)SNP_35728 | 435  | G | A | 18  | 16  | --     | GeBP    |
|            | Ca(ICCV2/PI489777)SNP_35729 | 607  | T | C | 26  | 30  | --     | GeBP    |
|            | Ca(ICCV2/PI489777)SNP_35730 | 613  | C | T | 25  | 12  | --     | GeBP    |
|            | Ca(ICCV2/PI489777)SNP_35731 | 747  | A | G | 33  | 31  | --     | GeBP    |
|            | Ca(ICCV2/PI489777)SNP_35732 | 813  | A | G | 30  | 28  | --     | GeBP    |
|            | Ca(ICCV2/PI489777)SNP_35733 | 835  | G | C | 26  | 25  | --     | GeBP    |
|            | Ca(ICCV2/PI489777)SNP_35734 | 847  | A | G | 28  | 28  | --     | GeBP    |
|            | Ca(ICCV2/PI489777)SNP_35735 | 1076 | T | C | 22  | 24  | --     | GeBP    |
|            | Ca(ICCV2/PI489777)SNP_35736 | 1117 | A | T | 26  | 22  | --     | GeBP    |
|            | Ca(ICCV2/PI489777)SNP_35737 | 1502 | G | T | 15  | 8   | --     | GeBP    |

|            |                            |      |   |   |    |    |    |           |
|------------|----------------------------|------|---|---|----|----|----|-----------|
| CakTC29219 | Ca(ICC2/PI489777)SNP_35738 | 333  | T | C | 18 | 7  | -- | --        |
|            | Ca(ICC2/PI489777)SNP_35739 | 339  | T | C | 19 | 8  | -- | --        |
|            | Ca(ICC2/PI489777)SNP_35740 | 498  | A | G | 10 | 16 | -- | --        |
|            | Ca(ICC2/PI489777)SNP_35741 | 594  | C | T | 11 | 17 | -- | --        |
|            | Ca(ICC2/PI489777)SNP_35742 | 721  | T | G | 8  | 15 | -- | --        |
|            | Ca(ICC2/PI489777)SNP_35743 | 788  | A | G | 9  | 8  | -- | --        |
| CakTC30188 | Ca(ICC2/PI489777)SNP_35744 | 577  | T | C | 7  | 5  | -- | --        |
| CakTC29480 | Ca(ICC2/PI489777)SNP_35745 | 518  | A | C | 3  | 3  | -- | --        |
|            | Ca(ICC2/PI489777)SNP_35746 | 656  | C | G | 4  | 3  | -- | --        |
|            | Ca(ICC2/PI489777)SNP_35747 | 951  | C | T | 3  | 3  | -- | --        |
|            | Ca(ICC2/PI489777)SNP_35748 | 960  | A | G | 3  | 3  | -- | --        |
|            | Ca(ICC2/PI489777)SNP_35749 | 1101 | A | G | 4  | 4  | -- | --        |
|            | Ca(ICC2/PI489777)SNP_35750 | 1162 | T | C | 4  | 4  | -- | --        |
|            | Ca(ICC2/PI489777)SNP_35751 | 1268 | T | G | 8  | 6  | -- | --        |
|            | Ca(ICC2/PI489777)SNP_35752 | 1340 | C | T | 7  | 6  | -- | --        |
| CakTC35511 | Ca(ICC2/PI489777)SNP_35753 | 504  | G | A | 9  | 9  | -- | --        |
|            | Ca(ICC2/PI489777)SNP_35754 | 837  | T | G | 6  | 6  | -- | --        |
|            | Ca(ICC2/PI489777)SNP_35755 | 1020 | A | G | 11 | 5  | -- | --        |
|            | Ca(ICC2/PI489777)SNP_35756 | 2088 | G | A | 12 | 4  | -- | --        |
|            | Ca(ICC2/PI489777)SNP_35757 | 2946 | G | A | 18 | 6  | -- | --        |
|            | Ca(ICC2/PI489777)SNP_35758 | 2952 | A | G | 19 | 6  | -- | --        |
|            | Ca(ICC2/PI489777)SNP_35759 | 3363 | T | C | 11 | 3  | -- | --        |
| CakTC39586 | Ca(ICC2/PI489777)SNP_35760 | 606  | T | C | 5  | 7  | -- | --        |
|            | Ca(ICC2/PI489777)SNP_35761 | 853  | C | T | 5  | 7  | -- | --        |
|            | Ca(ICC2/PI489777)SNP_35762 | 890  | T | C | 5  | 6  | -- | --        |
|            | Ca(ICC2/PI489777)SNP_35763 | 1514 | T | C | 8  | 6  | -- | --        |
|            | Ca(ICC2/PI489777)SNP_35764 | 1652 | C | T | 4  | 4  | -- | --        |
| CakTC03448 | Ca(ICC2/PI489777)SNP_35765 | 1382 | T | C | 3  | 4  | -- | --        |
| CakTC35071 | Ca(ICC2/PI489777)SNP_35766 | 225  | G | A | 8  | 8  | -- | --        |
|            | Ca(ICC2/PI489777)SNP_35767 | 281  | A | C | 7  | 6  | -- | --        |
| CakTC23748 | Ca(ICC2/PI489777)SNP_35768 | 222  | A | G | 26 | 9  | -- | --        |
|            | Ca(ICC2/PI489777)SNP_35769 | 348  | A | C | 46 | 10 | -- | --        |
|            | Ca(ICC2/PI489777)SNP_35770 | 393  | C | T | 44 | 13 | -- | --        |
| CakTC41332 | Ca(ICC2/PI489777)SNP_35771 | 563  | T | C | 30 | 19 | -- | --        |
|            | Ca(ICC2/PI489777)SNP_35772 | 911  | G | A | 34 | 7  | -- | --        |
|            | Ca(ICC2/PI489777)SNP_35773 | 1259 | C | T | 25 | 12 | -- | --        |
|            | Ca(ICC2/PI489777)SNP_35774 | 1429 | G | A | 22 | 11 | -- | --        |
|            | Ca(ICC2/PI489777)SNP_35775 | 2506 | A | G | 9  | 4  | -- | --        |
| CakTC25345 | Ca(ICC2/PI489777)SNP_35776 | 260  | A | C | 14 | 13 | -- | --        |
|            | Ca(ICC2/PI489777)SNP_35777 | 512  | G | A | 33 | 20 | -- | --        |
|            | Ca(ICC2/PI489777)SNP_35778 | 738  | C | T | 33 | 17 | -- | --        |
|            | Ca(ICC2/PI489777)SNP_35779 | 1005 | C | T | 40 | 20 | -- | --        |
|            | Ca(ICC2/PI489777)SNP_35780 | 1071 | A | G | 40 | 18 | -- | --        |
|            | Ca(ICC2/PI489777)SNP_35781 | 1560 | A | C | 47 | 17 | -- | --        |
|            | Ca(ICC2/PI489777)SNP_35782 | 1677 | G | A | 49 | 15 | -- | --        |
|            | Ca(ICC2/PI489777)SNP_35783 | 2179 | T | A | 13 | 4  | -- | --        |
| CakTC41785 | Ca(ICC2/PI489777)SNP_35784 | 200  | T | G | 7  | 6  | -- | --        |
|            | Ca(ICC2/PI489777)SNP_35785 | 476  | G | C | 5  | 8  | -- | --        |
|            | Ca(ICC2/PI489777)SNP_35786 | 1099 | C | T | 5  | 4  | -- | --        |
|            | Ca(ICC2/PI489777)SNP_35787 | 2010 | T | C | 11 | 7  | -- | --        |
| CakTC29866 | Ca(ICC2/PI489777)SNP_35788 | 49   | G | A | 6  | 4  | -- | --        |
|            | Ca(ICC2/PI489777)SNP_35789 | 204  | A | G | 9  | 11 | -- | --        |
|            | Ca(ICC2/PI489777)SNP_35790 | 284  | A | C | 8  | 11 | -- | --        |
|            | Ca(ICC2/PI489777)SNP_35791 | 358  | T | C | 7  | 11 | -- | --        |
|            | Ca(ICC2/PI489777)SNP_35792 | 944  | C | T | 7  | 9  | -- | --        |
|            | Ca(ICC2/PI489777)SNP_35793 | 985  | G | A | 7  | 6  | -- | --        |
| CakTC42904 | Ca(ICC2/PI489777)SNP_35794 | 485  | G | C | 11 | 12 | -- | --        |
|            | Ca(ICC2/PI489777)SNP_35795 | 608  | C | G | 8  | 6  | -- | --        |
|            | Ca(ICC2/PI489777)SNP_35796 | 761  | T | G | 10 | 5  | -- | --        |
| CakTC37701 | Ca(ICC2/PI489777)SNP_35797 | 528  | C | T | 6  | 4  | -- | --        |
| CakTC32535 | Ca(ICC2/PI489777)SNP_35798 | 222  | G | A | 3  | 7  | -- | --        |
|            | Ca(ICC2/PI489777)SNP_35799 | 1493 | A | G | 16 | 15 | -- | --        |
|            | Ca(ICC2/PI489777)SNP_35800 | 1797 | T | G | 9  | 17 | -- | --        |
|            | Ca(ICC2/PI489777)SNP_35801 | 2137 | A | G | 7  | 3  | -- | --        |
| CakTC05896 | Ca(ICC2/PI489777)SNP_35802 | 87   | T | C | 7  | 11 | -- | CCAAT     |
|            | Ca(ICC2/PI489777)SNP_35803 | 151  | C | T | 13 | 12 | -- | CCAAT     |
| CakTC25117 | Ca(ICC2/PI489777)SNP_35804 | 902  | G | A | 20 | 5  | -- | MYB       |
|            | Ca(ICC2/PI489777)SNP_35805 | 904  | T | C | 27 | 5  | -- | MYB       |
|            | Ca(ICC2/PI489777)SNP_35806 | 1053 | A | C | 26 | 5  | -- | MYB       |
|            | Ca(ICC2/PI489777)SNP_35807 | 1063 | G | T | 17 | 5  | -- | MYB       |
| CakTC39863 | Ca(ICC2/PI489777)SNP_35808 | 608  | T | C | 15 | 11 | -- | --        |
|            | Ca(ICC2/PI489777)SNP_35809 | 1315 | T | C | 22 | 14 | -- | --        |
|            | Ca(ICC2/PI489777)SNP_35810 | 1442 | C | G | 14 | 16 | -- | --        |
| CakTC37278 | Ca(ICC2/PI489777)SNP_35811 | 203  | G | C | 19 | 12 | -- | AP2-EREBP |

|            |                            |      |   |   |    |    |           |           |
|------------|----------------------------|------|---|---|----|----|-----------|-----------|
|            | Ca(ICC2/P1489777)SNP_35812 | 362  | C | T | 23 | 13 | --        | AP2-EREBP |
|            | Ca(ICC2/P1489777)SNP_35813 | 380  | C | T | 26 | 12 | --        | AP2-EREBP |
|            | Ca(ICC2/P1489777)SNP_35814 | 496  | G | A | 20 | 15 | --        | AP2-EREBP |
|            | Ca(ICC2/P1489777)SNP_35815 | 522  | G | A | 22 | 15 | --        | AP2-EREBP |
|            | Ca(ICC2/P1489777)SNP_35816 | 647  | A | G | 33 | 12 | --        | AP2-EREBP |
|            | Ca(ICC2/P1489777)SNP_35817 | 695  | A | G | 36 | 9  | --        | AP2-EREBP |
|            | Ca(ICC2/P1489777)SNP_35818 | 844  | T | C | 42 | 18 | --        | AP2-EREBP |
|            | Ca(ICC2/P1489777)SNP_35819 | 880  | T | C | 41 | 20 | --        | AP2-EREBP |
| CakTC11668 | Ca(ICC2/P1489777)SNP_35820 | 407  | C | T | 6  | 3  | --        | --        |
|            | Ca(ICC2/P1489777)SNP_35821 | 824  | G | A | 7  | 4  | --        | --        |
|            | Ca(ICC2/P1489777)SNP_35822 | 1130 | C | T | 4  | 3  | --        | --        |
| CakTC32308 | Ca(ICC2/P1489777)SNP_35823 | 338  | A | G | 3  | 4  | --        | --        |
|            | Ca(ICC2/P1489777)SNP_35824 | 808  | A | C | 5  | 5  | --        | --        |
|            | Ca(ICC2/P1489777)SNP_35825 | 1009 | T | C | 6  | 4  | --        | --        |
| CakTC26221 | Ca(ICC2/P1489777)SNP_35826 | 846  | G | A | 6  | 9  | --        | --        |
| CakTC39563 | Ca(ICC2/P1489777)SNP_35827 | 1138 | A | T | 7  | 4  | --        | --        |
| CakTC37285 | Ca(ICC2/P1489777)SNP_35828 | 127  | A | T | 8  | 8  | --        | TPR       |
|            | Ca(ICC2/P1489777)SNP_35829 | 402  | G | A | 9  | 5  | --        | TPR       |
| CakTC35230 | Ca(ICC2/P1489777)SNP_35830 | 422  | T | C | 9  | 4  | --        | --        |
|            | Ca(ICC2/P1489777)SNP_35831 | 1834 | C | A | 7  | 4  | --        | --        |
| CakTC39797 | Ca(ICC2/P1489777)SNP_35832 | 427  | A | G | 16 | 11 | Shoot     | --        |
| CakTC38565 | Ca(ICC2/P1489777)SNP_35833 | 73   | C | G | 7  | 9  | --        | --        |
|            | Ca(ICC2/P1489777)SNP_35834 | 205  | C | T | 8  | 22 | --        | --        |
|            | Ca(ICC2/P1489777)SNP_35835 | 489  | G | A | 12 | 19 | --        | --        |
|            | Ca(ICC2/P1489777)SNP_35836 | 490  | C | A | 12 | 19 | --        | --        |
|            | Ca(ICC2/P1489777)SNP_35837 | 556  | A | C | 9  | 29 | --        | --        |
|            | Ca(ICC2/P1489777)SNP_35838 | 569  | C | G | 8  | 28 | --        | --        |
|            | Ca(ICC2/P1489777)SNP_35839 | 796  | A | G | 7  | 24 | --        | --        |
|            | Ca(ICC2/P1489777)SNP_35840 | 978  | C | T | 6  | 13 | --        | --        |
| CakTC41600 | Ca(ICC2/P1489777)SNP_35841 | 723  | C | A | 4  | 6  | --        | --        |
| CakTC31799 | Ca(ICC2/P1489777)SNP_35842 | 154  | T | C | 6  | 7  | --        | --        |
|            | Ca(ICC2/P1489777)SNP_35843 | 1049 | G | A | 3  | 7  | --        | --        |
|            | Ca(ICC2/P1489777)SNP_35844 | 1051 | A | C | 3  | 7  | --        | --        |
| CakTC23775 | Ca(ICC2/P1489777)SNP_35845 | 614  | T | C | 13 | 11 | --        | C3H       |
| CakTC26478 | Ca(ICC2/P1489777)SNP_35846 | 638  | T | A | 23 | 6  | --        | --        |
|            | Ca(ICC2/P1489777)SNP_35847 | 1457 | T | C | 19 | 6  | --        | --        |
|            | Ca(ICC2/P1489777)SNP_35848 | 2271 | C | G | 29 | 20 | --        | --        |
| CakTC38954 | Ca(ICC2/P1489777)SNP_35849 | 741  | A | T | 12 | 4  | --        | --        |
| CakTC31133 | Ca(ICC2/P1489777)SNP_35850 | 11   | C | T | 4  | 4  | Young_pod | --        |
|            | Ca(ICC2/P1489777)SNP_35851 | 1451 | T | C | 4  | 5  | Young_pod | --        |
|            | Ca(ICC2/P1489777)SNP_35852 | 1460 | C | T | 4  | 5  | Young_pod | --        |
|            | Ca(ICC2/P1489777)SNP_35853 | 2095 | T | C | 5  | 5  | Young_pod | --        |
| CakTC37922 | Ca(ICC2/P1489777)SNP_35854 | 527  | T | C | 10 | 4  | Shoot     | --        |
|            | Ca(ICC2/P1489777)SNP_35855 | 593  | A | G | 7  | 5  | Shoot     | --        |
|            | Ca(ICC2/P1489777)SNP_35856 | 619  | A | G | 7  | 5  | Shoot     | --        |
|            | Ca(ICC2/P1489777)SNP_35857 | 742  | G | A | 3  | 3  | Shoot     | --        |
| CakTC32856 | Ca(ICC2/P1489777)SNP_35858 | 386  | T | C | 36 | 30 | --        | --        |
| CakTC09827 | Ca(ICC2/P1489777)SNP_35859 | 854  | A | G | 10 | 3  | --        | --        |
|            | Ca(ICC2/P1489777)SNP_35860 | 1573 | T | C | 5  | 3  | --        | --        |
| CakTC27649 | Ca(ICC2/P1489777)SNP_35861 | 781  | C | T | 8  | 16 | Flower    | bud       |
|            | Ca(ICC2/P1489777)SNP_35862 | 896  | T | A | 8  | 19 | Flower    | bud       |
|            | Ca(ICC2/P1489777)SNP_35863 | 914  | A | G | 8  | 21 | Flower    | bud       |
|            | Ca(ICC2/P1489777)SNP_35864 | 1079 | A | G | 8  | 18 | Flower    | bud       |
|            | Ca(ICC2/P1489777)SNP_35865 | 1790 | C | T | 5  | 5  | Flower    | bud       |
| CakTC28035 | Ca(ICC2/P1489777)SNP_35866 | 1017 | C | G | 5  | 6  | --        | --        |
|            | Ca(ICC2/P1489777)SNP_35867 | 1455 | C | T | 11 | 6  | --        | --        |
| CakTC31649 | Ca(ICC2/P1489777)SNP_35868 | 2496 | A | G | 3  | 3  | --        | --        |
| CakTC29853 | Ca(ICC2/P1489777)SNP_35869 | 578  | A | G | 4  | 4  | --        | --        |
|            | Ca(ICC2/P1489777)SNP_35870 | 622  | T | C | 3  | 3  | --        | --        |
|            | Ca(ICC2/P1489777)SNP_35871 | 669  | T | G | 4  | 3  | --        | --        |
| CakTC33630 | Ca(ICC2/P1489777)SNP_35872 | 213  | C | G | 12 | 4  | --        | --        |
|            | Ca(ICC2/P1489777)SNP_35873 | 336  | C | T | 13 | 4  | --        | --        |
|            | Ca(ICC2/P1489777)SNP_35874 | 1444 | A | G | 5  | 4  | --        | --        |
| CakTC42540 | Ca(ICC2/P1489777)SNP_35875 | 257  | A | G | 8  | 11 | --        | --        |
|            | Ca(ICC2/P1489777)SNP_35876 | 364  | T | C | 12 | 10 | --        | --        |
| CakTC17709 | Ca(ICC2/P1489777)SNP_35877 | 253  | A | G | 24 | 4  | --        | --        |
| CakTC28647 | Ca(ICC2/P1489777)SNP_35878 | 145  | A | G | 39 | 19 | --        | --        |
|            | Ca(ICC2/P1489777)SNP_35879 | 549  | A | T | 20 | 17 | --        | --        |
| CakTC28422 | Ca(ICC2/P1489777)SNP_35880 | 449  | G | A | 9  | 8  | --        | --        |
|            | Ca(ICC2/P1489777)SNP_35881 | 964  | T | C | 9  | 5  | --        | --        |
|            | Ca(ICC2/P1489777)SNP_35882 | 1261 | G | A | 9  | 7  | --        | --        |
|            | Ca(ICC2/P1489777)SNP_35883 | 2173 | C | G | 14 | 8  | --        | --        |
|            | Ca(ICC2/P1489777)SNP_35884 | 2350 | A | G | 16 | 8  | --        | --        |
| CakTC42929 | Ca(ICC2/P1489777)SNP_35885 | 134  | T | C | 3  | 4  | --        | bHLH      |

|            |                             |      |   |   |     |    |    |           |
|------------|-----------------------------|------|---|---|-----|----|----|-----------|
|            | Ca(ICCV2/PI489777)SNP_35886 | 143  | T | C | 3   | 3  | -- | bHLH      |
| CakTC41463 | Ca(ICCV2/PI489777)SNP_35887 | 551  | C | G | 39  | 49 | -- | --        |
| CakTC30275 | Ca(ICCV2/PI489777)SNP_35888 | 439  | G | A | 122 | 59 | -- | --        |
|            | Ca(ICCV2/PI489777)SNP_35889 | 582  | C | T | 151 | 62 | -- | --        |
|            | Ca(ICCV2/PI489777)SNP_35890 | 652  | C | T | 125 | 53 | -- | --        |
| CakTC38783 | Ca(ICCV2/PI489777)SNP_35891 | 910  | G | A | 10  | 7  | -- | --        |
|            | Ca(ICCV2/PI489777)SNP_35892 | 912  | T | A | 10  | 5  | -- | --        |
| CakTC43259 | Ca(ICCV2/PI489777)SNP_35893 | 435  | G | A | 11  | 7  | -- | --        |
| CakTC37994 | Ca(ICCV2/PI489777)SNP_35894 | 249  | G | A | 7   | 22 | -- | --        |
|            | Ca(ICCV2/PI489777)SNP_35895 | 420  | C | T | 7   | 19 | -- | --        |
|            | Ca(ICCV2/PI489777)SNP_35896 | 565  | C | T | 9   | 12 | -- | --        |
|            | Ca(ICCV2/PI489777)SNP_35897 | 613  | G | A | 9   | 10 | -- | --        |
| CakTC09832 | Ca(ICCV2/PI489777)SNP_35898 | 32   | C | A | 68  | 13 | -- | --        |
| CakTC27276 | Ca(ICCV2/PI489777)SNP_35899 | 634  | G | A | 58  | 4  | -- | --        |
| CakTC38646 | Ca(ICCV2/PI489777)SNP_35900 | 977  | A | G | 25  | 15 | -- | --        |
|            | Ca(ICCV2/PI489777)SNP_35901 | 1349 | T | C | 15  | 23 | -- | --        |
|            | Ca(ICCV2/PI489777)SNP_35902 | 1427 | G | A | 17  | 25 | -- | --        |
|            | Ca(ICCV2/PI489777)SNP_35903 | 1625 | A | G | 17  | 16 | -- | --        |
| CakTC38504 | Ca(ICCV2/PI489777)SNP_35904 | 344  | T | C | 3   | 3  | -- | --        |
|            | Ca(ICCV2/PI489777)SNP_35905 | 728  | A | T | 6   | 3  | -- | --        |
|            | Ca(ICCV2/PI489777)SNP_35906 | 871  | T | C | 6   | 5  | -- | --        |
|            | Ca(ICCV2/PI489777)SNP_35907 | 886  | G | A | 6   | 5  | -- | --        |
| CakTC40159 | Ca(ICCV2/PI489777)SNP_35908 | 908  | T | G | 3   | 4  | -- | --        |
|            | Ca(ICCV2/PI489777)SNP_35909 | 981  | T | A | 3   | 5  | -- | --        |
| CakTC35000 | Ca(ICCV2/PI489777)SNP_35910 | 1499 | G | A | 11  | 7  | -- | --        |
|            | Ca(ICCV2/PI489777)SNP_35911 | 1814 | T | C | 15  | 7  | -- | --        |
| CakTC30855 | Ca(ICCV2/PI489777)SNP_35912 | 512  | G | C | 4   | 3  | -- | AP2-EREBP |
| CakTC26674 | Ca(ICCV2/PI489777)SNP_35913 | 594  | T | C | 16  | 5  | -- | --        |
|            | Ca(ICCV2/PI489777)SNP_35914 | 663  | G | A | 27  | 4  | -- | --        |
|            | Ca(ICCV2/PI489777)SNP_35915 | 1020 | C | T | 12  | 6  | -- | --        |
|            | Ca(ICCV2/PI489777)SNP_35916 | 1074 | A | C | 10  | 4  | -- | --        |
|            | Ca(ICCV2/PI489777)SNP_35917 | 1701 | G | T | 5   | 4  | -- | --        |
| CakTC22874 | Ca(ICCV2/PI489777)SNP_35918 | 1018 | C | G | 57  | 12 | -- | --        |
| CakTC39435 | Ca(ICCV2/PI489777)SNP_35919 | 1127 | T | A | 3   | 4  | -- | --        |
| CakTC38769 | Ca(ICCV2/PI489777)SNP_35920 | 2063 | A | G | 4   | 9  | -- | --        |
| CakTC36930 | Ca(ICCV2/PI489777)SNP_35921 | 200  | T | C | 4   | 7  | -- | --        |
|            | Ca(ICCV2/PI489777)SNP_35922 | 299  | T | G | 8   | 10 | -- | --        |
|            | Ca(ICCV2/PI489777)SNP_35923 | 354  | T | G | 9   | 10 | -- | --        |
| CakTC29260 | Ca(ICCV2/PI489777)SNP_35924 | 197  | T | C | 5   | 3  | -- | --        |
|            | Ca(ICCV2/PI489777)SNP_35925 | 964  | G | A | 8   | 14 | -- | --        |
|            | Ca(ICCV2/PI489777)SNP_35926 | 1216 | A | G | 8   | 6  | -- | --        |
| CakTC34087 | Ca(ICCV2/PI489777)SNP_35927 | 1329 | C | G | 7   | 8  | -- | --        |
|            | Ca(ICCV2/PI489777)SNP_35928 | 1967 | T | A | 5   | 4  | -- | --        |
| CakTC33973 | Ca(ICCV2/PI489777)SNP_35929 | 77   | G | A | 3   | 4  | -- | --        |
|            | Ca(ICCV2/PI489777)SNP_35930 | 439  | G | A | 3   | 3  | -- | --        |
|            | Ca(ICCV2/PI489777)SNP_35931 | 941  | G | A | 15  | 7  | -- | --        |
|            | Ca(ICCV2/PI489777)SNP_35932 | 1348 | T | C | 15  | 6  | -- | --        |
|            | Ca(ICCV2/PI489777)SNP_35933 | 1363 | A | G | 15  | 6  | -- | --        |
|            | Ca(ICCV2/PI489777)SNP_35934 | 1529 | A | C | 34  | 10 | -- | --        |
|            | Ca(ICCV2/PI489777)SNP_35935 | 1759 | C | T | 38  | 13 | -- | --        |
|            | Ca(ICCV2/PI489777)SNP_35936 | 1845 | A | T | 31  | 8  | -- | --        |
|            | Ca(ICCV2/PI489777)SNP_35937 | 1859 | G | A | 27  | 8  | -- | --        |
| CakTC41449 | Ca(ICCV2/PI489777)SNP_35938 | 282  | G | A | 22  | 13 | -- | --        |
|            | Ca(ICCV2/PI489777)SNP_35939 | 413  | G | A | 17  | 9  | -- | --        |
|            | Ca(ICCV2/PI489777)SNP_35940 | 522  | C | T | 24  | 22 | -- | --        |
|            | Ca(ICCV2/PI489777)SNP_35941 | 550  | T | C | 25  | 21 | -- | --        |
|            | Ca(ICCV2/PI489777)SNP_35942 | 1235 | G | A | 8   | 4  | -- | --        |
|            | Ca(ICCV2/PI489777)SNP_35943 | 2072 | G | T | 13  | 11 | -- | --        |
| CakTC37555 | Ca(ICCV2/PI489777)SNP_35944 | 545  | C | G | 8   | 7  | -- | --        |
|            | Ca(ICCV2/PI489777)SNP_35945 | 567  | G | C | 10  | 7  | -- | --        |
|            | Ca(ICCV2/PI489777)SNP_35946 | 590  | C | T | 8   | 6  | -- | --        |
|            | Ca(ICCV2/PI489777)SNP_35947 | 748  | G | C | 8   | 5  | -- | --        |
|            | Ca(ICCV2/PI489777)SNP_35948 | 766  | A | G | 8   | 6  | -- | --        |
|            | Ca(ICCV2/PI489777)SNP_35949 | 808  | T | C | 13  | 7  | -- | --        |
|            | Ca(ICCV2/PI489777)SNP_35950 | 823  | G | A | 12  | 7  | -- | --        |
|            | Ca(ICCV2/PI489777)SNP_35951 | 885  | T | G | 11  | 4  | -- | --        |
|            | Ca(ICCV2/PI489777)SNP_35952 | 1200 | T | C | 4   | 3  | -- | --        |
|            | Ca(ICCV2/PI489777)SNP_35953 | 1375 | C | A | 3   | 4  | -- | --        |
| CakTC31844 | Ca(ICCV2/PI489777)SNP_35954 | 500  | C | T | 10  | 4  | -- | --        |
|            | Ca(ICCV2/PI489777)SNP_35955 | 1261 | A | G | 3   | 4  | -- | --        |
| CakTC28224 | Ca(ICCV2/PI489777)SNP_35956 | 403  | A | T | 19  | 17 | -- | --        |
|            | Ca(ICCV2/PI489777)SNP_35957 | 2146 | C | T | 28  | 9  | -- | --        |
| CakTC38451 | Ca(ICCV2/PI489777)SNP_35958 | 863  | G | T | 3   | 5  | -- | --        |
| CakTC40599 | Ca(ICCV2/PI489777)SNP_35959 | 80   | T | C | 25  | 4  | -- | LOB       |

|            |                            |      |   |   |    |    |           |    |
|------------|----------------------------|------|---|---|----|----|-----------|----|
| CakTC37082 | Ca(ICC2/PI489777)SNP_35960 | 222  | T | C | 25 | 10 | --        | -- |
|            | Ca(ICC2/PI489777)SNP_35961 | 483  | C | T | 19 | 5  | --        | -- |
| CakTC23678 | Ca(ICC2/PI489777)SNP_35962 | 233  | C | A | 53 | 18 | --        | -- |
|            | Ca(ICC2/PI489777)SNP_35963 | 371  | C | T | 61 | 23 | --        | -- |
|            | Ca(ICC2/PI489777)SNP_35964 | 377  | C | T | 56 | 22 | --        | -- |
|            | Ca(ICC2/PI489777)SNP_35965 | 467  | T | G | 63 | 23 | --        | -- |
|            | Ca(ICC2/PI489777)SNP_35966 | 854  | A | G | 79 | 9  | --        | -- |
| CakTC26821 | Ca(ICC2/PI489777)SNP_35967 | 648  | T | G | 22 | 5  | --        | -- |
|            | Ca(ICC2/PI489777)SNP_35968 | 758  | C | T | 15 | 4  | --        | -- |
|            | Ca(ICC2/PI489777)SNP_35969 | 796  | A | G | 28 | 3  | --        | -- |
|            | Ca(ICC2/PI489777)SNP_35970 | 845  | T | C | 30 | 4  | --        | -- |
|            | Ca(ICC2/PI489777)SNP_35971 | 906  | C | T | 27 | 4  | --        | -- |
|            | Ca(ICC2/PI489777)SNP_35972 | 955  | T | C | 27 | 4  | --        | -- |
| CakTC25425 | Ca(ICC2/PI489777)SNP_35973 | 513  | T | C | 8  | 3  | --        | -- |
|            | Ca(ICC2/PI489777)SNP_35974 | 886  | C | G | 4  | 4  | --        | -- |
|            | Ca(ICC2/PI489777)SNP_35975 | 1968 | T | C | 5  | 5  | --        | -- |
|            | Ca(ICC2/PI489777)SNP_35976 | 2250 | A | T | 10 | 8  | --        | -- |
|            | Ca(ICC2/PI489777)SNP_35977 | 2385 | A | C | 10 | 8  | --        | -- |
|            | Ca(ICC2/PI489777)SNP_35978 | 2506 | C | G | 10 | 8  | --        | -- |
| CakTC37448 | Ca(ICC2/PI489777)SNP_35979 | 317  | G | C | 4  | 5  | --        | -- |
|            | Ca(ICC2/PI489777)SNP_35980 | 981  | T | C | 9  | 7  | --        | -- |
| CakTC37597 | Ca(ICC2/PI489777)SNP_35981 | 123  | T | C | 3  | 12 | --        | -- |
|            | Ca(ICC2/PI489777)SNP_35982 | 1001 | T | C | 22 | 23 | --        | -- |
|            | Ca(ICC2/PI489777)SNP_35983 | 1082 | C | T | 20 | 23 | --        | -- |
|            | Ca(ICC2/PI489777)SNP_35984 | 1466 | A | G | 7  | 15 | --        | -- |
| CakTC31940 | Ca(ICC2/PI489777)SNP_35985 | 1231 | G | A | 9  | 3  | --        | -- |
| CakTC18001 | Ca(ICC2/PI489777)SNP_35986 | 400  | A | G | 46 | 6  | --        | -- |
|            | Ca(ICC2/PI489777)SNP_35987 | 1259 | C | T | 14 | 7  | --        | -- |
| CakTC30304 | Ca(ICC2/PI489777)SNP_35988 | 270  | A | T | 3  | 3  | Young_pod | -- |
|            | Ca(ICC2/PI489777)SNP_35989 | 480  | C | T | 3  | 3  | Young_pod | -- |
| CakTC10925 | Ca(ICC2/PI489777)SNP_35990 | 352  | C | T | 10 | 4  | --        | -- |
|            | Ca(ICC2/PI489777)SNP_35991 | 707  | T | C | 9  | 6  | --        | -- |
| CakTC14089 | Ca(ICC2/PI489777)SNP_35992 | 355  | C | T | 4  | 3  | --        | -- |
| CakTC38995 | Ca(ICC2/PI489777)SNP_35993 | 1329 | G | C | 3  | 3  | --        | -- |
| CakTC33197 | Ca(ICC2/PI489777)SNP_35994 | 468  | A | G | 14 | 17 | --        | -- |
|            | Ca(ICC2/PI489777)SNP_35995 | 660  | A | G | 16 | 10 | --        | -- |
|            | Ca(ICC2/PI489777)SNP_35996 | 1536 | T | C | 12 | 4  | --        | -- |
|            | Ca(ICC2/PI489777)SNP_35997 | 3160 | G | A | 13 | 6  | --        | -- |
|            | Ca(ICC2/PI489777)SNP_35998 | 4251 | G | C | 11 | 13 | --        | -- |
|            | Ca(ICC2/PI489777)SNP_35999 | 4536 | G | A | 20 | 10 | --        | -- |
|            | Ca(ICC2/PI489777)SNP_36000 | 4539 | T | C | 20 | 9  | --        | -- |
|            | Ca(ICC2/PI489777)SNP_36001 | 4913 | C | A | 13 | 6  | --        | -- |
|            | Ca(ICC2/PI489777)SNP_36002 | 5474 | G | C | 7  | 9  | --        | -- |
|            | Ca(ICC2/PI489777)SNP_36003 | 5700 | T | G | 3  | 4  | --        | -- |
| CakTC27719 | Ca(ICC2/PI489777)SNP_36004 | 116  | A | C | 13 | 3  | --        | -- |
| CakTC38945 | Ca(ICC2/PI489777)SNP_36005 | 1131 | G | C | 8  | 6  | --        | -- |
|            | Ca(ICC2/PI489777)SNP_36006 | 1256 | T | A | 8  | 9  | --        | -- |
| CakTC43223 | Ca(ICC2/PI489777)SNP_36007 | 129  | A | G | 5  | 4  | --        | -- |
|            | Ca(ICC2/PI489777)SNP_36008 | 289  | T | G | 8  | 6  | --        | -- |
|            | Ca(ICC2/PI489777)SNP_36009 | 585  | A | C | 12 | 5  | --        | -- |
|            | Ca(ICC2/PI489777)SNP_36010 | 734  | T | G | 11 | 4  | --        | -- |
| CakTC37357 | Ca(ICC2/PI489777)SNP_36011 | 1628 | G | C | 5  | 5  | --        | -- |
| CakTC39152 | Ca(ICC2/PI489777)SNP_36012 | 106  | A | G | 46 | 43 | --        | -- |
|            | Ca(ICC2/PI489777)SNP_36013 | 239  | G | A | 57 | 45 | --        | -- |
|            | Ca(ICC2/PI489777)SNP_36014 | 301  | C | T | 59 | 58 | --        | -- |
|            | Ca(ICC2/PI489777)SNP_36015 | 448  | A | C | 40 | 36 | --        | -- |
| CakTC39173 | Ca(ICC2/PI489777)SNP_36016 | 117  | A | G | 9  | 4  | --        | -- |
|            | Ca(ICC2/PI489777)SNP_36017 | 855  | T | A | 14 | 7  | --        | -- |
|            | Ca(ICC2/PI489777)SNP_36018 | 962  | A | G | 18 | 7  | --        | -- |
|            | Ca(ICC2/PI489777)SNP_36019 | 1366 | A | T | 7  | 8  | --        | -- |
|            | Ca(ICC2/PI489777)SNP_36020 | 1391 | A | C | 7  | 7  | --        | -- |
| CakTC25017 | Ca(ICC2/PI489777)SNP_36021 | 131  | C | T | 18 | 10 | --        | -- |
|            | Ca(ICC2/PI489777)SNP_36022 | 679  | T | A | 52 | 21 | --        | -- |
|            | Ca(ICC2/PI489777)SNP_36023 | 963  | G | A | 19 | 11 | --        | -- |
|            | Ca(ICC2/PI489777)SNP_36024 | 1069 | A | C | 11 | 9  | --        | -- |
|            | Ca(ICC2/PI489777)SNP_36025 | 1201 | G | A | 8  | 6  | --        | -- |
| CakTC27626 | Ca(ICC2/PI489777)SNP_36026 | 891  | C | A | 5  | 5  | --        | -- |
|            | Ca(ICC2/PI489777)SNP_36027 | 923  | G | A | 4  | 5  | --        | -- |
|            | Ca(ICC2/PI489777)SNP_36028 | 995  | C | T | 5  | 5  | --        | -- |
| CakTC26228 | Ca(ICC2/PI489777)SNP_36029 | 677  | G | A | 3  | 7  | --        | -- |
| CakTC26860 | Ca(ICC2/PI489777)SNP_36030 | 858  | C | T | 21 | 11 | --        | -- |
|            | Ca(ICC2/PI489777)SNP_36031 | 1479 | A | G | 17 | 8  | --        | -- |
|            | Ca(ICC2/PI489777)SNP_36032 | 2148 | G | T | 4  | 4  | --        | -- |
|            | Ca(ICC2/PI489777)SNP_36033 | 2202 | A | G | 5  | 4  | --        | -- |

|            |                            |      |   |   |     |     |        |      |
|------------|----------------------------|------|---|---|-----|-----|--------|------|
| CakTC41998 | Ca(ICC2/P1489777)SNP_36034 | 947  | A | G | 6   | 7   | --     | MADS |
| CakTC33379 | Ca(ICC2/P1489777)SNP_36035 | 143  | T | C | 4   | 3   | --     | --   |
|            | Ca(ICC2/P1489777)SNP_36036 | 415  | C | T | 8   | 5   | --     | --   |
| CakTC25918 | Ca(ICC2/P1489777)SNP_36037 | 4075 | T | C | 5   | 6   | --     | --   |
| CakTC27589 | Ca(ICC2/P1489777)SNP_36038 | 301  | T | A | 25  | 5   | --     | --   |
|            | Ca(ICC2/P1489777)SNP_36039 | 322  | T | A | 24  | 6   | --     | --   |
|            | Ca(ICC2/P1489777)SNP_36040 | 331  | A | G | 26  | 5   | --     | --   |
|            | Ca(ICC2/P1489777)SNP_36041 | 607  | G | A | 20  | 7   | --     | --   |
|            | Ca(ICC2/P1489777)SNP_36042 | 2313 | A | T | 7   | 6   | --     | --   |
| CakTC39118 | Ca(ICC2/P1489777)SNP_36043 | 152  | C | A | 3   | 4   | Flower | bud  |
|            | Ca(ICC2/P1489777)SNP_36044 | 534  | T | C | 6   | 10  | Flower | bud  |
|            | Ca(ICC2/P1489777)SNP_36045 | 586  | T | G | 10  | 11  | Flower | bud  |
|            | Ca(ICC2/P1489777)SNP_36046 | 805  | G | C | 10  | 5   | Flower | bud  |
|            | Ca(ICC2/P1489777)SNP_36047 | 808  | T | C | 10  | 5   | Flower | bud  |
|            | Ca(ICC2/P1489777)SNP_36048 | 888  | C | T | 7   | 3   | Flower | bud  |
|            | Ca(ICC2/P1489777)SNP_36049 | 1029 | C | G | 5   | 4   | Flower | bud  |
|            | Ca(ICC2/P1489777)SNP_36050 | 1096 | A | C | 5   | 4   | Flower | bud  |
|            | Ca(ICC2/P1489777)SNP_36051 | 1141 | T | G | 5   | 5   | Flower | bud  |
|            | Ca(ICC2/P1489777)SNP_36052 | 1161 | G | A | 4   | 4   | Flower | bud  |
|            | Ca(ICC2/P1489777)SNP_36053 | 1212 | G | C | 4   | 6   | Flower | bud  |
|            | Ca(ICC2/P1489777)SNP_36054 | 1263 | A | G | 5   | 5   | Flower | bud  |
|            | Ca(ICC2/P1489777)SNP_36055 | 1272 | C | T | 5   | 5   | Flower | bud  |
| CakTC40942 | Ca(ICC2/P1489777)SNP_36056 | 732  | G | A | 5   | 3   | --     | --   |
|            | Ca(ICC2/P1489777)SNP_36057 | 806  | C | T | 3   | 3   | --     | --   |
| CakTC42657 | Ca(ICC2/P1489777)SNP_36058 | 648  | T | A | 40  | 23  | --     | --   |
| CakTC42709 | Ca(ICC2/P1489777)SNP_36059 | 529  | T | C | 9   | 7   | --     | --   |
|            | Ca(ICC2/P1489777)SNP_36060 | 1102 | C | T | 10  | 11  | --     | --   |
| CakTC31523 | Ca(ICC2/P1489777)SNP_36061 | 738  | A | C | 9   | 4   | --     | --   |
| CakTC09630 | Ca(ICC2/P1489777)SNP_36062 | 2260 | G | A | 4   | 4   | --     | --   |
| CakTC26428 | Ca(ICC2/P1489777)SNP_36063 | 450  | G | A | 37  | 57  | --     | --   |
| CakTC42613 | Ca(ICC2/P1489777)SNP_36064 | 129  | G | T | 5   | 5   | --     | --   |
|            | Ca(ICC2/P1489777)SNP_36065 | 590  | C | T | 9   | 6   | --     | --   |
| CakTC39671 | Ca(ICC2/P1489777)SNP_36066 | 289  | T | A | 14  | 5   | --     | --   |
|            | Ca(ICC2/P1489777)SNP_36067 | 580  | C | T | 21  | 16  | --     | --   |
|            | Ca(ICC2/P1489777)SNP_36068 | 592  | A | G | 20  | 16  | --     | --   |
|            | Ca(ICC2/P1489777)SNP_36069 | 754  | T | C | 16  | 13  | --     | --   |
|            | Ca(ICC2/P1489777)SNP_36070 | 970  | C | T | 18  | 8   | --     | --   |
|            | Ca(ICC2/P1489777)SNP_36071 | 1064 | G | T | 16  | 11  | --     | --   |
|            | Ca(ICC2/P1489777)SNP_36072 | 1093 | C | T | 15  | 10  | --     | --   |
|            | Ca(ICC2/P1489777)SNP_36073 | 1145 | T | C | 12  | 12  | --     | --   |
| CakTC42227 | Ca(ICC2/P1489777)SNP_36074 | 510  | T | C | 67  | 72  | --     | --   |
|            | Ca(ICC2/P1489777)SNP_36075 | 591  | A | G | 70  | 65  | --     | --   |
| CakTC38029 | Ca(ICC2/P1489777)SNP_36076 | 186  | T | C | 20  | 12  | --     | --   |
|            | Ca(ICC2/P1489777)SNP_36077 | 190  | C | G | 19  | 12  | --     | --   |
|            | Ca(ICC2/P1489777)SNP_36078 | 561  | G | C | 22  | 9   | --     | --   |
|            | Ca(ICC2/P1489777)SNP_36079 | 756  | C | T | 22  | 10  | --     | --   |
| CakTC01472 | Ca(ICC2/P1489777)SNP_36080 | 542  | A | G | 27  | 22  | --     | --   |
| CakTC39697 | Ca(ICC2/P1489777)SNP_36081 | 966  | A | G | 6   | 7   | --     | --   |
| CakTC28591 | Ca(ICC2/P1489777)SNP_36082 | 1694 | G | A | 118 | 56  | --     | --   |
|            | Ca(ICC2/P1489777)SNP_36083 | 1957 | G | T | 144 | 75  | --     | --   |
|            | Ca(ICC2/P1489777)SNP_36084 | 1961 | A | G | 141 | 71  | --     | --   |
| CakTC09692 | Ca(ICC2/P1489777)SNP_36085 | 662  | T | C | 6   | 7   | --     | --   |
| CakTC35480 | Ca(ICC2/P1489777)SNP_36086 | 433  | A | C | 6   | 3   | --     | --   |
| CakTC29390 | Ca(ICC2/P1489777)SNP_36087 | 1179 | A | T | 10  | 4   | --     | --   |
| CakTC32448 | Ca(ICC2/P1489777)SNP_36088 | 444  | A | G | 8   | 7   | --     | --   |
|            | Ca(ICC2/P1489777)SNP_36089 | 490  | G | A | 7   | 7   | --     | --   |
|            | Ca(ICC2/P1489777)SNP_36090 | 664  | C | T | 16  | 11  | --     | --   |
| CakTC24081 | Ca(ICC2/P1489777)SNP_36091 | 114  | A | G | 3   | 3   | --     | --   |
| CakTC25223 | Ca(ICC2/P1489777)SNP_36092 | 384  | T | A | 3   | 6   | --     | --   |
| CakTC35853 | Ca(ICC2/P1489777)SNP_36093 | 557  | C | A | 29  | 10  | --     | --   |
| CakTC26658 | Ca(ICC2/P1489777)SNP_36094 | 519  | G | A | 210 | 169 | --     | --   |
|            | Ca(ICC2/P1489777)SNP_36095 | 1630 | G | T | 59  | 12  | --     | --   |
| CakTC41122 | Ca(ICC2/P1489777)SNP_36096 | 516  | G | T | 7   | 5   | --     | --   |
| CakTC26732 | Ca(ICC2/P1489777)SNP_36097 | 351  | A | G | 6   | 4   | --     | --   |
|            | Ca(ICC2/P1489777)SNP_36098 | 776  | A | G | 10  | 4   | --     | --   |
|            | Ca(ICC2/P1489777)SNP_36099 | 1001 | C | A | 14  | 20  | --     | --   |
| CakTC26112 | Ca(ICC2/P1489777)SNP_36100 | 1658 | C | G | 41  | 9   | --     | --   |
| CakTC26482 | Ca(ICC2/P1489777)SNP_36101 | 108  | G | A | 6   | 3   | --     | --   |
|            | Ca(ICC2/P1489777)SNP_36102 | 196  | T | C | 8   | 4   | --     | --   |
|            | Ca(ICC2/P1489777)SNP_36103 | 263  | G | C | 9   | 5   | --     | --   |
|            | Ca(ICC2/P1489777)SNP_36104 | 410  | A | C | 7   | 7   | --     | --   |
|            | Ca(ICC2/P1489777)SNP_36105 | 611  | G | A | 8   | 15  | --     | --   |
|            | Ca(ICC2/P1489777)SNP_36106 | 623  | C | G | 21  | 15  | --     | --   |
|            | Ca(ICC2/P1489777)SNP_36107 | 695  | A | G | 24  | 12  | --     | --   |



|            |                            |      |   |   |    |    |           |      |
|------------|----------------------------|------|---|---|----|----|-----------|------|
|            | Ca(ICC2/PI489777)SNP_36108 | 710  | C | T | 23 | 13 | --        | --   |
|            | Ca(ICC2/PI489777)SNP_36109 | 1089 | C | T | 14 | 15 | --        | --   |
|            | Ca(ICC2/PI489777)SNP_36110 | 1259 | T | C | 13 | 12 | --        | --   |
| CakTC38925 | Ca(ICC2/PI489777)SNP_36111 | 375  | G | A | 10 | 3  | --        | --   |
| CakTC42011 | Ca(ICC2/PI489777)SNP_36112 | 31   | C | T | 3  | 12 | --        | --   |
|            | Ca(ICC2/PI489777)SNP_36113 | 79   | T | C | 4  | 16 | --        | --   |
|            | Ca(ICC2/PI489777)SNP_36114 | 88   | C | A | 5  | 17 | --        | --   |
|            | Ca(ICC2/PI489777)SNP_36115 | 98   | T | C | 5  | 18 | --        | --   |
|            | Ca(ICC2/PI489777)SNP_36116 | 101  | T | C | 5  | 18 | --        | --   |
|            | Ca(ICC2/PI489777)SNP_36117 | 161  | T | C | 6  | 18 | --        | --   |
|            | Ca(ICC2/PI489777)SNP_36118 | 170  | G | A | 6  | 19 | --        | --   |
|            | Ca(ICC2/PI489777)SNP_36119 | 197  | A | G | 7  | 21 | --        | --   |
|            | Ca(ICC2/PI489777)SNP_36120 | 296  | T | C | 9  | 22 | --        | --   |
|            | Ca(ICC2/PI489777)SNP_36121 | 305  | A | G | 9  | 22 | --        | --   |
|            | Ca(ICC2/PI489777)SNP_36122 | 359  | T | C | 9  | 15 | --        | --   |
|            | Ca(ICC2/PI489777)SNP_36123 | 372  | A | C | 10 | 20 | --        | --   |
|            | Ca(ICC2/PI489777)SNP_36124 | 375  | T | C | 10 | 19 | --        | --   |
|            | Ca(ICC2/PI489777)SNP_36125 | 389  | C | A | 8  | 17 | --        | --   |
|            | Ca(ICC2/PI489777)SNP_36126 | 407  | T | G | 9  | 7  | --        | --   |
|            | Ca(ICC2/PI489777)SNP_36127 | 410  | G | A | 8  | 5  | --        | --   |
|            | Ca(ICC2/PI489777)SNP_36128 | 423  | C | A | 5  | 10 | --        | --   |
|            | Ca(ICC2/PI489777)SNP_36129 | 644  | T | C | 7  | 3  | --        | --   |
|            | Ca(ICC2/PI489777)SNP_36130 | 803  | A | G | 5  | 12 | --        | --   |
|            | Ca(ICC2/PI489777)SNP_36131 | 848  | T | C | 6  | 12 | --        | --   |
| CakTC31213 | Ca(ICC2/PI489777)SNP_36132 | 486  | C | G | 5  | 5  | --        | --   |
|            | Ca(ICC2/PI489777)SNP_36133 | 491  | G | A | 5  | 4  | --        | --   |
| CakTC36555 | Ca(ICC2/PI489777)SNP_36134 | 1594 | C | A | 3  | 7  | --        | --   |
| CakTC30496 | Ca(ICC2/PI489777)SNP_36135 | 222  | C | T | 13 | 15 | --        | --   |
|            | Ca(ICC2/PI489777)SNP_36136 | 348  | C | A | 15 | 23 | --        | --   |
|            | Ca(ICC2/PI489777)SNP_36137 | 398  | T | A | 14 | 17 | --        | --   |
|            | Ca(ICC2/PI489777)SNP_36138 | 710  | A | T | 21 | 14 | --        | --   |
|            | Ca(ICC2/PI489777)SNP_36139 | 857  | A | G | 22 | 15 | --        | --   |
|            | Ca(ICC2/PI489777)SNP_36140 | 1455 | A | T | 20 | 7  | --        | --   |
|            | Ca(ICC2/PI489777)SNP_36141 | 1709 | A | G | 14 | 8  | --        | --   |
|            | Ca(ICC2/PI489777)SNP_36142 | 1739 | G | C | 14 | 7  | --        | --   |
|            | Ca(ICC2/PI489777)SNP_36143 | 1817 | A | T | 16 | 9  | --        | --   |
|            | Ca(ICC2/PI489777)SNP_36144 | 1821 | A | G | 16 | 9  | --        | --   |
|            | Ca(ICC2/PI489777)SNP_36145 | 1833 | G | A | 15 | 10 | --        | --   |
|            | Ca(ICC2/PI489777)SNP_36146 | 1859 | T | C | 17 | 8  | --        | --   |
|            | Ca(ICC2/PI489777)SNP_36147 | 1967 | C | T | 16 | 14 | --        | --   |
|            | Ca(ICC2/PI489777)SNP_36148 | 1981 | A | G | 14 | 14 | --        | --   |
|            | Ca(ICC2/PI489777)SNP_36149 | 2083 | T | C | 14 | 15 | --        | --   |
|            | Ca(ICC2/PI489777)SNP_36150 | 2399 | T | A | 16 | 11 | --        | --   |
|            | Ca(ICC2/PI489777)SNP_36151 | 2495 | T | C | 15 | 9  | --        | --   |
| CakTC26627 | Ca(ICC2/PI489777)SNP_36152 | 409  | G | A | 13 | 11 | --        | --   |
| CakTC42408 | Ca(ICC2/PI489777)SNP_36153 | 1061 | T | C | 18 | 6  | --        | --   |
| CakTC42211 | Ca(ICC2/PI489777)SNP_36154 | 189  | G | A | 32 | 9  | --        | --   |
|            | Ca(ICC2/PI489777)SNP_36155 | 643  | T | G | 7  | 7  | --        | --   |
|            | Ca(ICC2/PI489777)SNP_36156 | 699  | T | C | 6  | 5  | --        | --   |
|            | Ca(ICC2/PI489777)SNP_36157 | 723  | A | C | 5  | 5  | --        | --   |
|            | Ca(ICC2/PI489777)SNP_36158 | 741  | T | C | 5  | 5  | --        | --   |
|            | Ca(ICC2/PI489777)SNP_36159 | 746  | C | G | 7  | 5  | --        | --   |
| CakTC33022 | Ca(ICC2/PI489777)SNP_36160 | 832  | T | G | 15 | 8  | --        | --   |
|            | Ca(ICC2/PI489777)SNP_36161 | 991  | G | A | 17 | 5  | --        | --   |
| CakTC39468 | Ca(ICC2/PI489777)SNP_36162 | 1035 | G | A | 15 | 36 | --        | --   |
|            | Ca(ICC2/PI489777)SNP_36163 | 1038 | G | T | 16 | 33 | --        | --   |
|            | Ca(ICC2/PI489777)SNP_36164 | 1374 | T | C | 6  | 12 | --        | --   |
| CakTC26766 | Ca(ICC2/PI489777)SNP_36165 | 1675 | G | C | 4  | 4  | Young_pod | FAR1 |
| CakTC39516 | Ca(ICC2/PI489777)SNP_36166 | 181  | A | G | 4  | 3  | --        | --   |
|            | Ca(ICC2/PI489777)SNP_36167 | 341  | G | T | 4  | 3  | --        | --   |
| CakTC28934 | Ca(ICC2/PI489777)SNP_36168 | 260  | T | C | 3  | 6  | --        | --   |
|            | Ca(ICC2/PI489777)SNP_36169 | 492  | G | A | 5  | 6  | --        | --   |
|            | Ca(ICC2/PI489777)SNP_36170 | 509  | G | A | 5  | 6  | --        | --   |
|            | Ca(ICC2/PI489777)SNP_36171 | 635  | C | G | 4  | 5  | --        | --   |
|            | Ca(ICC2/PI489777)SNP_36172 | 755  | G | C | 3  | 6  | --        | --   |
| CakTC41820 | Ca(ICC2/PI489777)SNP_36173 | 132  | C | A | 8  | 3  | --        | --   |
|            | Ca(ICC2/PI489777)SNP_36174 | 133  | A | G | 8  | 3  | --        | --   |
|            | Ca(ICC2/PI489777)SNP_36175 | 477  | T | G | 34 | 44 | --        | --   |
|            | Ca(ICC2/PI489777)SNP_36176 | 516  | C | G | 35 | 40 | --        | --   |
|            | Ca(ICC2/PI489777)SNP_36177 | 518  | G | T | 34 | 31 | --        | --   |
|            | Ca(ICC2/PI489777)SNP_36178 | 546  | A | T | 34 | 41 | --        | --   |
| CakTC38749 | Ca(ICC2/PI489777)SNP_36179 | 843  | G | A | 34 | 14 | --        | --   |
|            | Ca(ICC2/PI489777)SNP_36180 | 856  | T | G | 31 | 14 | --        | --   |
|            | Ca(ICC2/PI489777)SNP_36181 | 1030 | C | T | 15 | 5  | --        | --   |

|            |                            |      |   |   |     |     |        |             |
|------------|----------------------------|------|---|---|-----|-----|--------|-------------|
|            | Ca(ICC2/PI489777)SNP_36182 | 1043 | C | A | 15  | 4   | --     | --          |
| CakTC39066 | Ca(ICC2/PI489777)SNP_36183 | 232  | T | C | 5   | 3   | --     | --          |
| CakTC31790 | Ca(ICC2/PI489777)SNP_36184 | 115  | A | G | 3   | 6   | --     | --          |
|            | Ca(ICC2/PI489777)SNP_36185 | 157  | A | G | 4   | 7   | --     | --          |
|            | Ca(ICC2/PI489777)SNP_36186 | 537  | T | A | 5   | 4   | --     | --          |
| CakTC25922 | Ca(ICC2/PI489777)SNP_36187 | 528  | A | G | 20  | 5   | Flower | bud         |
|            | Ca(ICC2/PI489777)SNP_36188 | 536  | A | C | 20  | 11  | Flower | bud         |
|            | Ca(ICC2/PI489777)SNP_36189 | 1719 | T | C | 11  | 4   | Flower | bud         |
| CakTC24776 | Ca(ICC2/PI489777)SNP_36190 | 184  | C | T | 18  | 3   | --     | --          |
|            | Ca(ICC2/PI489777)SNP_36191 | 329  | G | A | 59  | 17  | --     | --          |
|            | Ca(ICC2/PI489777)SNP_36192 | 1627 | T | C | 211 | 124 | --     | --          |
| CakTC38678 | Ca(ICC2/PI489777)SNP_36193 | 394  | G | A | 16  | 13  | --     | --          |
|            | Ca(ICC2/PI489777)SNP_36194 | 685  | A | G | 20  | 7   | --     | --          |
|            | Ca(ICC2/PI489777)SNP_36195 | 691  | C | T | 20  | 7   | --     | --          |
|            | Ca(ICC2/PI489777)SNP_36196 | 845  | C | T | 11  | 7   | --     | --          |
| CakTC26779 | Ca(ICC2/PI489777)SNP_36197 | 276  | A | T | 11  | 12  | --     | SBP         |
|            | Ca(ICC2/PI489777)SNP_36198 | 451  | A | G | 17  | 16  | --     | SBP         |
|            | Ca(ICC2/PI489777)SNP_36199 | 524  | T | A | 14  | 13  | --     | SBP         |
|            | Ca(ICC2/PI489777)SNP_36200 | 832  | T | C | 11  | 24  | --     | SBP         |
|            | Ca(ICC2/PI489777)SNP_36201 | 902  | T | A | 12  | 21  | --     | SBP         |
|            | Ca(ICC2/PI489777)SNP_36202 | 1254 | A | G | 16  | 7   | --     | SBP         |
|            | Ca(ICC2/PI489777)SNP_36203 | 1849 | A | G | 16  | 11  | --     | SBP         |
|            | Ca(ICC2/PI489777)SNP_36204 | 2005 | G | C | 22  | 14  | --     | SBP         |
|            | Ca(ICC2/PI489777)SNP_36205 | 3125 | A | G | 13  | 17  | --     | SBP         |
|            | Ca(ICC2/PI489777)SNP_36206 | 3148 | T | C | 14  | 15  | --     | SBP         |
| CakTC42395 | Ca(ICC2/PI489777)SNP_36207 | 195  | A | G | 7   | 6   | --     | --          |
|            | Ca(ICC2/PI489777)SNP_36208 | 513  | A | G | 6   | 4   | --     | --          |
|            | Ca(ICC2/PI489777)SNP_36209 | 782  | A | G | 6   | 3   | --     | --          |
| CakTC36267 | Ca(ICC2/PI489777)SNP_36210 | 522  | T | C | 11  | 12  | --     | --          |
|            | Ca(ICC2/PI489777)SNP_36211 | 1188 | T | C | 12  | 9   | --     | --          |
|            | Ca(ICC2/PI489777)SNP_36212 | 1257 | C | T | 14  | 10  | --     | --          |
|            | Ca(ICC2/PI489777)SNP_36213 | 1716 | C | T | 17  | 8   | --     | --          |
|            | Ca(ICC2/PI489777)SNP_36214 | 2101 | C | A | 12  | 6   | --     | --          |
|            | Ca(ICC2/PI489777)SNP_36215 | 2247 | A | G | 12  | 6   | --     | --          |
|            | Ca(ICC2/PI489777)SNP_36216 | 2261 | T | A | 8   | 5   | --     | --          |
|            | Ca(ICC2/PI489777)SNP_36217 | 2706 | G | A | 10  | 5   | --     | --          |
| CakTC29905 | Ca(ICC2/PI489777)SNP_36218 | 229  | A | C | 5   | 3   | --     | PHD         |
|            | Ca(ICC2/PI489777)SNP_36219 | 236  | T | C | 4   | 3   | --     | PHD         |
|            | Ca(ICC2/PI489777)SNP_36220 | 1594 | T | A | 5   | 3   | --     | PHD         |
|            | Ca(ICC2/PI489777)SNP_36221 | 2168 | T | C | 10  | 5   | --     | PHD         |
|            | Ca(ICC2/PI489777)SNP_36222 | 2197 | T | C | 8   | 4   | --     | PHD         |
|            | Ca(ICC2/PI489777)SNP_36223 | 3310 | C | T | 7   | 7   | --     | PHD         |
|            | Ca(ICC2/PI489777)SNP_36224 | 3426 | A | T | 9   | 9   | --     | PHD         |
|            | Ca(ICC2/PI489777)SNP_36225 | 3898 | G | A | 10  | 3   | --     | PHD         |
|            | Ca(ICC2/PI489777)SNP_36226 | 4066 | A | G | 13  | 4   | --     | PHD         |
|            | Ca(ICC2/PI489777)SNP_36227 | 5527 | A | G | 10  | 4   | --     | PHD         |
| CakTC37119 | Ca(ICC2/PI489777)SNP_36228 | 467  | C | T | 3   | 12  | --     | --          |
| CakTC41631 | Ca(ICC2/PI489777)SNP_36229 | 161  | G | A | 18  | 11  | Shoot  | --          |
| CakTC38776 | Ca(ICC2/PI489777)SNP_36230 | 723  | A | C | 5   | 4   | --     | --          |
| CakTC30949 | Ca(ICC2/PI489777)SNP_36231 | 189  | T | C | 15  | 9   | --     | --          |
|            | Ca(ICC2/PI489777)SNP_36232 | 318  | G | A | 15  | 10  | --     | --          |
|            | Ca(ICC2/PI489777)SNP_36233 | 412  | G | A | 20  | 9   | --     | --          |
|            | Ca(ICC2/PI489777)SNP_36234 | 462  | C | T | 19  | 8   | --     | --          |
|            | Ca(ICC2/PI489777)SNP_36235 | 511  | A | G | 21  | 7   | --     | --          |
|            | Ca(ICC2/PI489777)SNP_36236 | 636  | G | C | 21  | 4   | --     | --          |
|            | Ca(ICC2/PI489777)SNP_36237 | 1109 | T | A | 17  | 7   | --     | --          |
|            | Ca(ICC2/PI489777)SNP_36238 | 1588 | C | T | 28  | 11  | --     | --          |
| CakTC29309 | Ca(ICC2/PI489777)SNP_36239 | 81   | C | A | 17  | 10  | --     | --          |
|            | Ca(ICC2/PI489777)SNP_36240 | 426  | C | T | 21  | 11  | --     | --          |
|            | Ca(ICC2/PI489777)SNP_36241 | 498  | C | T | 19  | 14  | --     | --          |
|            | Ca(ICC2/PI489777)SNP_36242 | 1027 | A | T | 14  | 9   | --     | --          |
| CakTC16449 | Ca(ICC2/PI489777)SNP_36243 | 863  | T | G | 21  | 12  | --     | MYB-related |
|            | Ca(ICC2/PI489777)SNP_36244 | 1313 | G | A | 99  | 40  | --     | MYB-related |
|            | Ca(ICC2/PI489777)SNP_36245 | 1442 | G | A | 74  | 37  | --     | MYB-related |
| CakTC31097 | Ca(ICC2/PI489777)SNP_36246 | 649  | T | C | 7   | 7   | --     | --          |
|            | Ca(ICC2/PI489777)SNP_36247 | 1081 | C | T | 9   | 4   | --     | --          |
| CakTC26446 | Ca(ICC2/PI489777)SNP_36248 | 112  | A | T | 20  | 8   | --     | --          |
|            | Ca(ICC2/PI489777)SNP_36249 | 113  | T | C | 20  | 8   | --     | --          |
|            | Ca(ICC2/PI489777)SNP_36250 | 566  | T | C | 46  | 38  | --     | --          |
|            | Ca(ICC2/PI489777)SNP_36251 | 688  | T | C | 39  | 31  | --     | --          |
|            | Ca(ICC2/PI489777)SNP_36252 | 1155 | T | C | 61  | 10  | --     | --          |
|            | Ca(ICC2/PI489777)SNP_36253 | 1659 | G | A | 39  | 16  | --     | --          |
| CakTC27197 | Ca(ICC2/PI489777)SNP_36254 | 25   | G | C | 3   | 3   | --     | --          |
|            | Ca(ICC2/PI489777)SNP_36255 | 46   | C | T | 3   | 3   | --     | --          |

|            |                            |      |   |   |     |    |    |     |
|------------|----------------------------|------|---|---|-----|----|----|-----|
|            | Ca(ICC2/PI489777)SNP_36256 | 255  | G | C | 6   | 7  | -- | --  |
|            | Ca(ICC2/PI489777)SNP_36257 | 529  | A | C | 9   | 4  | -- | --  |
|            | Ca(ICC2/PI489777)SNP_36258 | 994  | A | C | 6   | 5  | -- | --  |
|            | Ca(ICC2/PI489777)SNP_36259 | 1045 | C | T | 10  | 4  | -- | --  |
|            | Ca(ICC2/PI489777)SNP_36260 | 1160 | A | T | 11  | 3  | -- | --  |
|            | Ca(ICC2/PI489777)SNP_36261 | 1801 | T | C | 7   | 3  | -- | --  |
| CakTC34737 | Ca(ICC2/PI489777)SNP_36262 | 785  | G | C | 14  | 8  | -- | --  |
|            | Ca(ICC2/PI489777)SNP_36263 | 1292 | T | C | 14  | 7  | -- | --  |
|            | Ca(ICC2/PI489777)SNP_36264 | 1406 | C | T | 14  | 5  | -- | --  |
|            | Ca(ICC2/PI489777)SNP_36265 | 1910 | T | C | 16  | 8  | -- | --  |
|            | Ca(ICC2/PI489777)SNP_36266 | 2009 | T | C | 12  | 8  | -- | --  |
|            | Ca(ICC2/PI489777)SNP_36267 | 2438 | C | T | 20  | 7  | -- | --  |
|            | Ca(ICC2/PI489777)SNP_36268 | 2451 | A | G | 18  | 7  | -- | --  |
|            | Ca(ICC2/PI489777)SNP_36269 | 2681 | C | T | 13  | 8  | -- | --  |
|            | Ca(ICC2/PI489777)SNP_36270 | 2789 | A | G | 12  | 6  | -- | --  |
|            | Ca(ICC2/PI489777)SNP_36271 | 3434 | G | A | 8   | 3  | -- | --  |
| CakTC24536 | Ca(ICC2/PI489777)SNP_36272 | 342  | G | A | 26  | 5  | -- | SAP |
|            | Ca(ICC2/PI489777)SNP_36273 | 518  | A | C | 29  | 8  | -- | SAP |
|            | Ca(ICC2/PI489777)SNP_36274 | 684  | G | A | 24  | 7  | -- | SAP |
| CakTC27043 | Ca(ICC2/PI489777)SNP_36275 | 608  | A | C | 3   | 4  | -- | --  |
| CakTC28173 | Ca(ICC2/PI489777)SNP_36276 | 676  | C | T | 20  | 6  | -- | --  |
|            | Ca(ICC2/PI489777)SNP_36277 | 821  | C | T | 20  | 4  | -- | --  |
|            | Ca(ICC2/PI489777)SNP_36278 | 980  | G | A | 10  | 7  | -- | --  |
| CakTC41162 | Ca(ICC2/PI489777)SNP_36279 | 136  | C | T | 6   | 5  | -- | --  |
|            | Ca(ICC2/PI489777)SNP_36280 | 315  | A | G | 8   | 10 | -- | --  |
| CakTC23880 | Ca(ICC2/PI489777)SNP_36281 | 276  | T | G | 25  | 3  | -- | --  |
|            | Ca(ICC2/PI489777)SNP_36282 | 480  | T | C | 36  | 12 | -- | --  |
| CakTC37505 | Ca(ICC2/PI489777)SNP_36283 | 60   | G | A | 12  | 9  | -- | --  |
|            | Ca(ICC2/PI489777)SNP_36284 | 64   | T | A | 14  | 9  | -- | --  |
| CakTC40389 | Ca(ICC2/PI489777)SNP_36285 | 662  | G | A | 12  | 4  | -- | --  |
| CakTC02809 | Ca(ICC2/PI489777)SNP_36286 | 630  | T | C | 19  | 22 | -- | --  |
|            | Ca(ICC2/PI489777)SNP_36287 | 2056 | C | G | 10  | 22 | -- | --  |
|            | Ca(ICC2/PI489777)SNP_36288 | 2080 | A | C | 8   | 20 | -- | --  |
| CakTC33520 | Ca(ICC2/PI489777)SNP_36289 | 230  | A | T | 44  | 21 | -- | --  |
|            | Ca(ICC2/PI489777)SNP_36290 | 258  | G | C | 63  | 17 | -- | --  |
|            | Ca(ICC2/PI489777)SNP_36291 | 421  | G | A | 53  | 22 | -- | --  |
|            | Ca(ICC2/PI489777)SNP_36292 | 512  | C | T | 27  | 15 | -- | --  |
|            | Ca(ICC2/PI489777)SNP_36293 | 549  | G | A | 17  | 6  | -- | --  |
| CakTC33133 | Ca(ICC2/PI489777)SNP_36294 | 136  | G | C | 4   | 5  | -- | --  |
|            | Ca(ICC2/PI489777)SNP_36295 | 519  | T | C | 5   | 5  | -- | --  |
| CakTC39827 | Ca(ICC2/PI489777)SNP_36296 | 332  | G | A | 16  | 3  | -- | --  |
| CakTC09662 | Ca(ICC2/PI489777)SNP_36297 | 322  | G | A | 7   | 8  | -- | --  |
|            | Ca(ICC2/PI489777)SNP_36298 | 412  | T | A | 7   | 9  | -- | --  |
|            | Ca(ICC2/PI489777)SNP_36299 | 1048 | T | C | 10  | 8  | -- | --  |
| CakTC10227 | Ca(ICC2/PI489777)SNP_36300 | 96   | G | A | 4   | 3  | -- | --  |
| CakTC41217 | Ca(ICC2/PI489777)SNP_36301 | 730  | G | T | 10  | 9  | -- | C3H |
|            | Ca(ICC2/PI489777)SNP_36302 | 823  | A | G | 16  | 11 | -- | C3H |
|            | Ca(ICC2/PI489777)SNP_36303 | 866  | G | A | 20  | 12 | -- | C3H |
|            | Ca(ICC2/PI489777)SNP_36304 | 921  | T | A | 26  | 13 | -- | C3H |
|            | Ca(ICC2/PI489777)SNP_36305 | 1546 | A | C | 21  | 13 | -- | C3H |
|            | Ca(ICC2/PI489777)SNP_36306 | 1858 | T | C | 19  | 18 | -- | C3H |
|            | Ca(ICC2/PI489777)SNP_36307 | 2080 | T | C | 29  | 6  | -- | C3H |
|            | Ca(ICC2/PI489777)SNP_36308 | 2224 | C | G | 21  | 5  | -- | C3H |
| CakTC30155 | Ca(ICC2/PI489777)SNP_36309 | 392  | A | G | 8   | 4  | -- | --  |
| CakTC40681 | Ca(ICC2/PI489777)SNP_36310 | 419  | T | A | 3   | 4  | -- | --  |
|            | Ca(ICC2/PI489777)SNP_36311 | 773  | A | C | 3   | 4  | -- | --  |
| CakTC37896 | Ca(ICC2/PI489777)SNP_36312 | 231  | C | T | 3   | 7  | -- | --  |
| CakTC37621 | Ca(ICC2/PI489777)SNP_36313 | 668  | A | G | 156 | 54 | -- | --  |
|            | Ca(ICC2/PI489777)SNP_36314 | 737  | T | A | 87  | 62 | -- | --  |
|            | Ca(ICC2/PI489777)SNP_36315 | 857  | C | T | 180 | 65 | -- | --  |
|            | Ca(ICC2/PI489777)SNP_36316 | 956  | G | A | 138 | 54 | -- | --  |
|            | Ca(ICC2/PI489777)SNP_36317 | 1115 | C | G | 36  | 10 | -- | --  |
| CakTC28111 | Ca(ICC2/PI489777)SNP_36318 | 447  | G | A | 11  | 5  | -- | --  |
|            | Ca(ICC2/PI489777)SNP_36319 | 1782 | T | C | 20  | 7  | -- | --  |
|            | Ca(ICC2/PI489777)SNP_36320 | 2129 | G | A | 4   | 3  | -- | --  |
|            | Ca(ICC2/PI489777)SNP_36321 | 2214 | G | A | 4   | 3  | -- | --  |
| CakTC42053 | Ca(ICC2/PI489777)SNP_36322 | 209  | T | C | 11  | 8  | -- | --  |
| CakTC36023 | Ca(ICC2/PI489777)SNP_36323 | 1077 | T | C | 24  | 21 | -- | --  |
|            | Ca(ICC2/PI489777)SNP_36324 | 1198 | A | G | 15  | 20 | -- | --  |
|            | Ca(ICC2/PI489777)SNP_36325 | 2565 | G | A | 16  | 16 | -- | --  |
| CakTC26695 | Ca(ICC2/PI489777)SNP_36326 | 597  | A | G | 48  | 26 | -- | --  |
|            | Ca(ICC2/PI489777)SNP_36327 | 1324 | T | G | 3   | 5  | -- | --  |
| CakTC35957 | Ca(ICC2/PI489777)SNP_36328 | 1851 | T | C | 13  | 3  | -- | --  |
|            | Ca(ICC2/PI489777)SNP_36329 | 2437 | C | A | 4   | 3  | -- | --  |

|            |                            |      |   |   |    |    |        |     |
|------------|----------------------------|------|---|---|----|----|--------|-----|
|            | Ca(ICC2/PI489777)SNP_36330 | 2752 | A | G | 12 | 3  | --     | --  |
| CakTC25110 | Ca(ICC2/PI489777)SNP_36331 | 561  | T | A | 7  | 5  | --     | --  |
| CakTC42183 | Ca(ICC2/PI489777)SNP_36332 | 418  | T | A | 16 | 33 | --     | --  |
|            | Ca(ICC2/PI489777)SNP_36333 | 560  | T | G | 13 | 22 | --     | --  |
|            | Ca(ICC2/PI489777)SNP_36334 | 824  | A | T | 5  | 9  | --     | --  |
| CakTC33249 | Ca(ICC2/PI489777)SNP_36335 | 233  | C | T | 10 | 8  | --     | --  |
|            | Ca(ICC2/PI489777)SNP_36336 | 1750 | G | A | 12 | 13 | --     | --  |
|            | Ca(ICC2/PI489777)SNP_36337 | 2130 | G | A | 8  | 4  | --     | --  |
| CakTC34336 | Ca(ICC2/PI489777)SNP_36338 | 388  | C | T | 6  | 4  | Flower | bud |
|            | Ca(ICC2/PI489777)SNP_36339 | 403  | G | T | 6  | 4  | Flower | bud |
|            | Ca(ICC2/PI489777)SNP_36340 | 428  | G | A | 6  | 5  | Flower | bud |
| CakTC35078 | Ca(ICC2/PI489777)SNP_36341 | 1094 | A | G | 5  | 11 | --     | --  |
|            | Ca(ICC2/PI489777)SNP_36342 | 1415 | G | A | 7  | 6  | --     | --  |
|            | Ca(ICC2/PI489777)SNP_36343 | 1735 | C | T | 9  | 4  | --     | --  |
| CakTC34383 | Ca(ICC2/PI489777)SNP_36344 | 301  | A | G | 30 | 23 | --     | --  |
|            | Ca(ICC2/PI489777)SNP_36345 | 499  | C | T | 38 | 28 | --     | --  |
| CakTC25286 | Ca(ICC2/PI489777)SNP_36346 | 1221 | A | G | 18 | 15 | --     | --  |
|            | Ca(ICC2/PI489777)SNP_36347 | 1290 | C | T | 19 | 15 | --     | --  |
|            | Ca(ICC2/PI489777)SNP_36348 | 1594 | G | T | 6  | 5  | --     | --  |
| CakTC37919 | Ca(ICC2/PI489777)SNP_36349 | 248  | A | C | 3  | 13 | --     | --  |
|            | Ca(ICC2/PI489777)SNP_36350 | 286  | C | A | 3  | 13 | --     | --  |
|            | Ca(ICC2/PI489777)SNP_36351 | 440  | T | C | 3  | 6  | --     | --  |
| CakTC36830 | Ca(ICC2/PI489777)SNP_36352 | 480  | T | C | 14 | 13 | --     | --  |
|            | Ca(ICC2/PI489777)SNP_36353 | 1198 | A | G | 9  | 5  | --     | --  |
| CakTC42624 | Ca(ICC2/PI489777)SNP_36354 | 794  | G | A | 7  | 5  | --     | --  |
| CakTC25705 | Ca(ICC2/PI489777)SNP_36355 | 224  | T | C | 7  | 15 | --     | --  |
|            | Ca(ICC2/PI489777)SNP_36356 | 240  | C | T | 6  | 16 | --     | --  |
|            | Ca(ICC2/PI489777)SNP_36357 | 488  | C | T | 5  | 9  | --     | --  |
|            | Ca(ICC2/PI489777)SNP_36358 | 500  | T | C | 4  | 8  | --     | --  |
|            | Ca(ICC2/PI489777)SNP_36359 | 603  | G | C | 4  | 3  | --     | --  |
|            | Ca(ICC2/PI489777)SNP_36360 | 611  | C | T | 4  | 3  | --     | --  |
|            | Ca(ICC2/PI489777)SNP_36361 | 1097 | G | A | 13 | 13 | --     | --  |
|            | Ca(ICC2/PI489777)SNP_36362 | 1722 | G | A | 16 | 7  | --     | --  |
|            | Ca(ICC2/PI489777)SNP_36363 | 1826 | C | T | 20 | 7  | --     | --  |
|            | Ca(ICC2/PI489777)SNP_36364 | 2488 | T | C | 18 | 6  | --     | --  |
| CakTC23798 | Ca(ICC2/PI489777)SNP_36365 | 600  | T | C | 10 | 8  | --     | --  |
|            | Ca(ICC2/PI489777)SNP_36366 | 1037 | C | T | 9  | 14 | --     | --  |
|            | Ca(ICC2/PI489777)SNP_36367 | 1143 | T | C | 5  | 10 | --     | --  |
| CakTC36265 | Ca(ICC2/PI489777)SNP_36368 | 212  | C | T | 3  | 3  | --     | --  |
| CakTC33398 | Ca(ICC2/PI489777)SNP_36369 | 81   | G | A | 4  | 4  | Flower | bud |
| CakTC28325 | Ca(ICC2/PI489777)SNP_36370 | 167  | A | G | 11 | 5  | --     | --  |
|            | Ca(ICC2/PI489777)SNP_36371 | 178  | A | T | 13 | 5  | --     | --  |
|            | Ca(ICC2/PI489777)SNP_36372 | 224  | C | T | 18 | 7  | --     | --  |
|            | Ca(ICC2/PI489777)SNP_36373 | 258  | A | G | 16 | 6  | --     | --  |
|            | Ca(ICC2/PI489777)SNP_36374 | 273  | G | A | 20 | 7  | --     | --  |
|            | Ca(ICC2/PI489777)SNP_36375 | 433  | C | T | 28 | 6  | --     | --  |
|            | Ca(ICC2/PI489777)SNP_36376 | 700  | T | A | 11 | 15 | --     | --  |
|            | Ca(ICC2/PI489777)SNP_36377 | 791  | C | T | 12 | 13 | --     | --  |
|            | Ca(ICC2/PI489777)SNP_36378 | 866  | C | T | 5  | 10 | --     | --  |
| CakTC25828 | Ca(ICC2/PI489777)SNP_36379 | 39   | A | C | 5  | 3  | --     | --  |
|            | Ca(ICC2/PI489777)SNP_36380 | 1756 | T | C | 5  | 14 | --     | --  |
|            | Ca(ICC2/PI489777)SNP_36381 | 1778 | G | A | 5  | 14 | --     | --  |
|            | Ca(ICC2/PI489777)SNP_36382 | 1794 | G | A | 5  | 13 | --     | --  |
| CakTC39963 | Ca(ICC2/PI489777)SNP_36383 | 1163 | A | G | 13 | 5  | --     | --  |
| CakTC42965 | Ca(ICC2/PI489777)SNP_36384 | 204  | A | G | 8  | 5  | --     | --  |
|            | Ca(ICC2/PI489777)SNP_36385 | 317  | C | G | 7  | 9  | --     | --  |
|            | Ca(ICC2/PI489777)SNP_36386 | 521  | A | G | 7  | 7  | --     | --  |
|            | Ca(ICC2/PI489777)SNP_36387 | 560  | A | G | 7  | 6  | --     | --  |
|            | Ca(ICC2/PI489777)SNP_36388 | 801  | A | G | 5  | 5  | --     | --  |
| CakTC38293 | Ca(ICC2/PI489777)SNP_36389 | 199  | C | T | 8  | 8  | --     | --  |
| CakTC29706 | Ca(ICC2/PI489777)SNP_36390 | 438  | G | C | 3  | 5  | --     | --  |
|            | Ca(ICC2/PI489777)SNP_36391 | 540  | T | G | 3  | 3  | --     | --  |
| CakTC34242 | Ca(ICC2/PI489777)SNP_36392 | 237  | C | T | 5  | 8  | --     | --  |
|            | Ca(ICC2/PI489777)SNP_36393 | 285  | G | A | 5  | 7  | --     | --  |
|            | Ca(ICC2/PI489777)SNP_36394 | 301  | C | T | 6  | 8  | --     | --  |
| CakTC34754 | Ca(ICC2/PI489777)SNP_36395 | 113  | A | G | 12 | 11 | --     | --  |
|            | Ca(ICC2/PI489777)SNP_36396 | 1572 | A | G | 32 | 18 | --     | --  |
|            | Ca(ICC2/PI489777)SNP_36397 | 1710 | A | G | 31 | 10 | --     | --  |
|            | Ca(ICC2/PI489777)SNP_36398 | 1977 | A | G | 26 | 13 | --     | --  |
|            | Ca(ICC2/PI489777)SNP_36399 | 2871 | G | A | 12 | 8  | --     | --  |
|            | Ca(ICC2/PI489777)SNP_36400 | 2979 | T | C | 13 | 5  | --     | --  |
|            | Ca(ICC2/PI489777)SNP_36401 | 2988 | G | A | 9  | 5  | --     | --  |
| CakTC27688 | Ca(ICC2/PI489777)SNP_36402 | 380  | T | C | 3  | 10 | --     | --  |
| CakTC39374 | Ca(ICC2/PI489777)SNP_36403 | 280  | G | A | 11 | 3  | --     | --  |

|            |                            |      |   |   |    |    |           |     |
|------------|----------------------------|------|---|---|----|----|-----------|-----|
|            | Ca(ICC2/PI489777)SNP_36404 | 754  | T | G | 6  | 4  | --        | --  |
|            | Ca(ICC2/PI489777)SNP_36405 | 1099 | C | A | 7  | 6  | --        | --  |
|            | Ca(ICC2/PI489777)SNP_36406 | 1143 | A | G | 8  | 7  | --        | --  |
|            | Ca(ICC2/PI489777)SNP_36407 | 1266 | A | G | 5  | 5  | --        | --  |
|            | Ca(ICC2/PI489777)SNP_36408 | 1296 | C | T | 4  | 5  | --        | --  |
|            | Ca(ICC2/PI489777)SNP_36409 | 1324 | G | T | 5  | 6  | --        | --  |
| CakTC00363 | Ca(ICC2/PI489777)SNP_36410 | 60   | T | C | 3  | 3  | --        | --  |
| CakTC28360 | Ca(ICC2/PI489777)SNP_36411 | 353  | C | T | 4  | 4  | --        | --  |
|            | Ca(ICC2/PI489777)SNP_36412 | 391  | T | C | 3  | 4  | --        | --  |
|            | Ca(ICC2/PI489777)SNP_36413 | 443  | A | T | 3  | 5  | --        | --  |
|            | Ca(ICC2/PI489777)SNP_36414 | 446  | A | C | 3  | 5  | --        | --  |
|            | Ca(ICC2/PI489777)SNP_36415 | 755  | T | C | 4  | 4  | --        | --  |
|            | Ca(ICC2/PI489777)SNP_36416 | 767  | T | C | 4  | 4  | --        | --  |
|            | Ca(ICC2/PI489777)SNP_36417 | 2024 | C | T | 6  | 3  | --        | --  |
|            | Ca(ICC2/PI489777)SNP_36418 | 2047 | A | C | 6  | 4  | --        | --  |
|            | Ca(ICC2/PI489777)SNP_36419 | 2132 | G | A | 5  | 4  | --        | --  |
| CakTC37988 | Ca(ICC2/PI489777)SNP_36420 | 106  | T | C | 18 | 22 | --        | --  |
|            | Ca(ICC2/PI489777)SNP_36421 | 424  | A | G | 46 | 34 | --        | --  |
|            | Ca(ICC2/PI489777)SNP_36422 | 949  | A | G | 5  | 4  | --        | --  |
| CakTC34827 | Ca(ICC2/PI489777)SNP_36423 | 1033 | T | C | 17 | 12 | --        | --  |
|            | Ca(ICC2/PI489777)SNP_36424 | 1060 | G | A | 18 | 11 | --        | --  |
|            | Ca(ICC2/PI489777)SNP_36425 | 1135 | T | G | 11 | 11 | --        | --  |
|            | Ca(ICC2/PI489777)SNP_36426 | 1231 | G | C | 13 | 9  | --        | --  |
|            | Ca(ICC2/PI489777)SNP_36427 | 1618 | T | C | 17 | 8  | --        | --  |
|            | Ca(ICC2/PI489777)SNP_36428 | 1764 | A | G | 18 | 9  | --        | --  |
|            | Ca(ICC2/PI489777)SNP_36429 | 2410 | C | T | 12 | 9  | --        | --  |
|            | Ca(ICC2/PI489777)SNP_36430 | 2430 | T | C | 13 | 9  | --        | --  |
|            | Ca(ICC2/PI489777)SNP_36431 | 2620 | G | A | 23 | 15 | --        | --  |
|            | Ca(ICC2/PI489777)SNP_36432 | 2788 | C | T | 27 | 19 | --        | --  |
|            | Ca(ICC2/PI489777)SNP_36433 | 2836 | G | A | 28 | 22 | --        | --  |
|            | Ca(ICC2/PI489777)SNP_36434 | 2869 | C | A | 23 | 22 | --        | --  |
|            | Ca(ICC2/PI489777)SNP_36435 | 3184 | T | C | 17 | 5  | --        | --  |
|            | Ca(ICC2/PI489777)SNP_36436 | 3196 | G | T | 18 | 4  | --        | --  |
|            | Ca(ICC2/PI489777)SNP_36437 | 3292 | G | A | 20 | 4  | --        | --  |
|            | Ca(ICC2/PI489777)SNP_36438 | 3841 | C | T | 11 | 24 | --        | --  |
|            | Ca(ICC2/PI489777)SNP_36439 | 3850 | G | T | 11 | 20 | --        | --  |
|            | Ca(ICC2/PI489777)SNP_36440 | 3913 | A | G | 9  | 24 | --        | --  |
| CakTC26508 | Ca(ICC2/PI489777)SNP_36441 | 263  | C | T | 10 | 7  | --        | --  |
|            | Ca(ICC2/PI489777)SNP_36442 | 973  | G | A | 12 | 3  | --        | --  |
|            | Ca(ICC2/PI489777)SNP_36443 | 1111 | T | C | 11 | 6  | --        | --  |
|            | Ca(ICC2/PI489777)SNP_36444 | 1237 | G | C | 4  | 5  | --        | --  |
|            | Ca(ICC2/PI489777)SNP_36445 | 1865 | A | G | 8  | 8  | --        | --  |
|            | Ca(ICC2/PI489777)SNP_36446 | 1901 | A | C | 8  | 8  | --        | --  |
|            | Ca(ICC2/PI489777)SNP_36447 | 2064 | C | T | 13 | 11 | --        | --  |
|            | Ca(ICC2/PI489777)SNP_36448 | 2133 | C | T | 17 | 12 | --        | --  |
|            | Ca(ICC2/PI489777)SNP_36449 | 2246 | G | A | 21 | 8  | --        | --  |
|            | Ca(ICC2/PI489777)SNP_36450 | 2270 | G | A | 17 | 9  | --        | --  |
|            | Ca(ICC2/PI489777)SNP_36451 | 2510 | A | G | 19 | 11 | --        | --  |
|            | Ca(ICC2/PI489777)SNP_36452 | 2671 | T | A | 9  | 9  | --        | --  |
|            | Ca(ICC2/PI489777)SNP_36453 | 2991 | C | T | 27 | 4  | --        | --  |
|            | Ca(ICC2/PI489777)SNP_36454 | 3391 | A | G | 15 | 10 | --        | --  |
| CakTC06463 | Ca(ICC2/PI489777)SNP_36455 | 47   | C | T | 5  | 16 | --        | --  |
|            | Ca(ICC2/PI489777)SNP_36456 | 147  | T | C | 10 | 23 | --        | --  |
|            | Ca(ICC2/PI489777)SNP_36457 | 354  | C | T | 7  | 22 | --        | --  |
|            | Ca(ICC2/PI489777)SNP_36458 | 393  | C | T | 6  | 21 | --        | --  |
|            | Ca(ICC2/PI489777)SNP_36459 | 417  | T | C | 6  | 15 | --        | --  |
| CakTC42554 | Ca(ICC2/PI489777)SNP_36460 | 485  | C | T | 31 | 21 | --        | --  |
|            | Ca(ICC2/PI489777)SNP_36461 | 1242 | A | C | 33 | 38 | --        | --  |
|            | Ca(ICC2/PI489777)SNP_36462 | 1692 | G | A | 12 | 12 | --        | --  |
|            | Ca(ICC2/PI489777)SNP_36463 | 1714 | C | T | 14 | 13 | --        | --  |
| CakTC29795 | Ca(ICC2/PI489777)SNP_36464 | 785  | A | T | 3  | 3  | Young_pod | --  |
| CakTC31344 | Ca(ICC2/PI489777)SNP_36465 | 1771 | G | A | 3  | 5  | --        | --  |
| CakTC10237 | Ca(ICC2/PI489777)SNP_36466 | 1447 | T | C | 4  | 9  | --        | --  |
|            | Ca(ICC2/PI489777)SNP_36467 | 1517 | C | T | 5  | 5  | --        | --  |
|            | Ca(ICC2/PI489777)SNP_36468 | 2035 | C | T | 9  | 7  | --        | --  |
| CakTC28625 | Ca(ICC2/PI489777)SNP_36469 | 186  | C | A | 8  | 3  | Shoot     | --  |
|            | Ca(ICC2/PI489777)SNP_36470 | 208  | C | T | 9  | 3  | Shoot     | --  |
|            | Ca(ICC2/PI489777)SNP_36471 | 218  | C | T | 9  | 3  | Shoot     | --  |
| CakTC23424 | Ca(ICC2/PI489777)SNP_36472 | 1022 | A | G | 20 | 10 | --        | HSF |
|            | Ca(ICC2/PI489777)SNP_36473 | 1246 | T | C | 15 | 10 | --        | HSF |
|            | Ca(ICC2/PI489777)SNP_36474 | 1790 | G | A | 5  | 5  | --        | HSF |
|            | Ca(ICC2/PI489777)SNP_36475 | 1811 | G | A | 5  | 4  | --        | HSF |
|            | Ca(ICC2/PI489777)SNP_36476 | 1927 | C | T | 7  | 3  | --        | HSF |
|            | Ca(ICC2/PI489777)SNP_36477 | 2172 | A | G | 4  | 3  | --        | HSF |

|            |                            |      |   |   |     |    |       |            |
|------------|----------------------------|------|---|---|-----|----|-------|------------|
|            | Ca(ICC2/PI489777)SNP_36478 | 2203 | A | G | 4   | 3  | --    | HSF        |
| CakTC38736 | Ca(ICC2/PI489777)SNP_36479 | 276  | A | G | 10  | 6  | --    | --         |
|            | Ca(ICC2/PI489777)SNP_36480 | 771  | T | A | 7   | 5  | --    | --         |
|            | Ca(ICC2/PI489777)SNP_36481 | 1095 | G | A | 10  | 6  | --    | --         |
|            | Ca(ICC2/PI489777)SNP_36482 | 1215 | C | T | 5   | 4  | --    | --         |
| CakTC28459 | Ca(ICC2/PI489777)SNP_36483 | 245  | C | T | 15  | 9  | --    | --         |
|            | Ca(ICC2/PI489777)SNP_36484 | 304  | C | T | 15  | 13 | --    | --         |
|            | Ca(ICC2/PI489777)SNP_36485 | 419  | G | A | 29  | 15 | --    | --         |
|            | Ca(ICC2/PI489777)SNP_36486 | 803  | G | A | 49  | 14 | --    | --         |
|            | Ca(ICC2/PI489777)SNP_36487 | 827  | G | A | 47  | 13 | --    | --         |
|            | Ca(ICC2/PI489777)SNP_36488 | 872  | G | T | 38  | 12 | --    | --         |
|            | Ca(ICC2/PI489777)SNP_36489 | 1019 | A | G | 29  | 10 | --    | --         |
|            | Ca(ICC2/PI489777)SNP_36490 | 1343 | T | G | 23  | 7  | --    | --         |
|            | Ca(ICC2/PI489777)SNP_36491 | 1508 | G | T | 33  | 9  | --    | --         |
|            | Ca(ICC2/PI489777)SNP_36492 | 1514 | G | A | 34  | 8  | --    | --         |
| CakTC25394 | Ca(ICC2/PI489777)SNP_36493 | 1186 | C | T | 6   | 6  | --    | Jumonji    |
|            | Ca(ICC2/PI489777)SNP_36494 | 1281 | A | C | 6   | 6  | --    | Jumonji    |
|            | Ca(ICC2/PI489777)SNP_36495 | 1328 | G | C | 7   | 6  | --    | Jumonji    |
| CakTC31735 | Ca(ICC2/PI489777)SNP_36496 | 132  | A | C | 8   | 3  | --    | Alfin-like |
|            | Ca(ICC2/PI489777)SNP_36497 | 161  | C | T | 6   | 3  | --    | Alfin-like |
| CakTC27355 | Ca(ICC2/PI489777)SNP_36498 | 54   | T | A | 10  | 4  | --    | --         |
|            | Ca(ICC2/PI489777)SNP_36499 | 58   | C | T | 10  | 4  | --    | --         |
|            | Ca(ICC2/PI489777)SNP_36500 | 216  | T | C | 8   | 6  | --    | --         |
| CakTC42435 | Ca(ICC2/PI489777)SNP_36501 | 142  | C | A | 8   | 10 | --    | --         |
|            | Ca(ICC2/PI489777)SNP_36502 | 304  | T | C | 10  | 12 | --    | --         |
|            | Ca(ICC2/PI489777)SNP_36503 | 391  | C | T | 12  | 11 | --    | --         |
|            | Ca(ICC2/PI489777)SNP_36504 | 436  | C | T | 11  | 9  | --    | --         |
|            | Ca(ICC2/PI489777)SNP_36505 | 1047 | C | T | 23  | 14 | --    | --         |
|            | Ca(ICC2/PI489777)SNP_36506 | 1219 | A | G | 11  | 15 | --    | --         |
|            | Ca(ICC2/PI489777)SNP_36507 | 1481 | A | C | 8   | 11 | --    | --         |
| CakTC23899 | Ca(ICC2/PI489777)SNP_36508 | 1064 | T | C | 4   | 3  | --    | --         |
| CakTC29505 | Ca(ICC2/PI489777)SNP_36509 | 822  | G | T | 32  | 11 | --    | --         |
|            | Ca(ICC2/PI489777)SNP_36510 | 902  | C | A | 38  | 12 | --    | --         |
| CakTC39309 | Ca(ICC2/PI489777)SNP_36511 | 475  | C | T | 10  | 7  | --    | --         |
|            | Ca(ICC2/PI489777)SNP_36512 | 920  | A | T | 6   | 6  | --    | --         |
|            | Ca(ICC2/PI489777)SNP_36513 | 1075 | T | C | 5   | 6  | --    | --         |
|            | Ca(ICC2/PI489777)SNP_36514 | 1190 | G | A | 6   | 4  | --    | --         |
| CakTC39753 | Ca(ICC2/PI489777)SNP_36515 | 176  | A | C | 13  | 4  | --    | --         |
|            | Ca(ICC2/PI489777)SNP_36516 | 177  | C | A | 13  | 4  | --    | --         |
|            | Ca(ICC2/PI489777)SNP_36517 | 1254 | T | C | 6   | 9  | --    | --         |
| CakTC26101 | Ca(ICC2/PI489777)SNP_36518 | 283  | C | T | 30  | 14 | --    | --         |
|            | Ca(ICC2/PI489777)SNP_36519 | 299  | T | C | 33  | 12 | --    | --         |
|            | Ca(ICC2/PI489777)SNP_36520 | 404  | C | T | 47  | 13 | --    | --         |
|            | Ca(ICC2/PI489777)SNP_36521 | 451  | T | C | 53  | 18 | --    | --         |
|            | Ca(ICC2/PI489777)SNP_36522 | 737  | G | A | 48  | 16 | --    | --         |
|            | Ca(ICC2/PI489777)SNP_36523 | 797  | T | C | 36  | 15 | --    | --         |
|            | Ca(ICC2/PI489777)SNP_36524 | 1121 | A | T | 18  | 13 | --    | --         |
| CakTC42420 | Ca(ICC2/PI489777)SNP_36525 | 414  | A | G | 9   | 5  | --    | --         |
| CakTC30455 | Ca(ICC2/PI489777)SNP_36526 | 234  | C | T | 6   | 4  | Shoot | --         |
|            | Ca(ICC2/PI489777)SNP_36527 | 345  | A | G | 3   | 3  | Shoot | --         |
| CakTC22756 | Ca(ICC2/PI489777)SNP_36528 | 16   | A | G | 5   | 4  | Shoot | --         |
|            | Ca(ICC2/PI489777)SNP_36529 | 160  | G | T | 9   | 9  | Shoot | --         |
| CakTC34243 | Ca(ICC2/PI489777)SNP_36530 | 520  | A | G | 187 | 72 | --    | --         |
| CakTC12665 | Ca(ICC2/PI489777)SNP_36531 | 359  | T | C | 3   | 3  | --    | --         |
| CakTC26537 | Ca(ICC2/PI489777)SNP_36532 | 232  | C | T | 7   | 12 | --    | --         |
|            | Ca(ICC2/PI489777)SNP_36533 | 264  | A | C | 5   | 14 | --    | --         |
|            | Ca(ICC2/PI489777)SNP_36534 | 636  | T | A | 10  | 17 | --    | --         |
| CakTC34730 | Ca(ICC2/PI489777)SNP_36535 | 2593 | G | C | 50  | 25 | --    | --         |
|            | Ca(ICC2/PI489777)SNP_36536 | 3295 | C | G | 21  | 16 | --    | --         |
|            | Ca(ICC2/PI489777)SNP_36537 | 3669 | G | C | 20  | 21 | --    | --         |
| CakTC10747 | Ca(ICC2/PI489777)SNP_36538 | 359  | A | G | 17  | 11 | --    | TUB        |
|            | Ca(ICC2/PI489777)SNP_36539 | 494  | T | C | 15  | 18 | --    | TUB        |
|            | Ca(ICC2/PI489777)SNP_36540 | 519  | G | T | 11  | 19 | --    | TUB        |
|            | Ca(ICC2/PI489777)SNP_36541 | 698  | A | G | 11  | 15 | --    | TUB        |
|            | Ca(ICC2/PI489777)SNP_36542 | 710  | G | A | 11  | 15 | --    | TUB        |
|            | Ca(ICC2/PI489777)SNP_36543 | 890  | G | A | 13  | 9  | --    | TUB        |
|            | Ca(ICC2/PI489777)SNP_36544 | 1010 | G | A | 14  | 12 | --    | TUB        |
|            | Ca(ICC2/PI489777)SNP_36545 | 1373 | G | A | 13  | 16 | --    | TUB        |
|            | Ca(ICC2/PI489777)SNP_36546 | 1439 | T | C | 11  | 13 | --    | TUB        |
|            | Ca(ICC2/PI489777)SNP_36547 | 1753 | C | T | 21  | 19 | --    | TUB        |
| CakTC24125 | Ca(ICC2/PI489777)SNP_36548 | 2184 | A | G | 28  | 3  | --    | --         |
| CakTC41812 | Ca(ICC2/PI489777)SNP_36549 | 1225 | G | C | 15  | 3  | --    | --         |
|            | Ca(ICC2/PI489777)SNP_36550 | 2328 | C | G | 8   | 6  | --    | --         |
| CakTC24645 | Ca(ICC2/PI489777)SNP_36551 | 1116 | G | A | 12  | 4  | --    | --         |

|            |                            |      |   |   |     |     |        |              |
|------------|----------------------------|------|---|---|-----|-----|--------|--------------|
|            | Ca(ICC2/PI489777)SNP_36552 | 1164 | C | T | 12  | 7   | --     | --           |
|            | Ca(ICC2/PI489777)SNP_36553 | 2658 | A | T | 5   | 4   | --     | --           |
|            | Ca(ICC2/PI489777)SNP_36554 | 3191 | T | C | 12  | 10  | --     | --           |
|            | Ca(ICC2/PI489777)SNP_36555 | 3556 | G | A | 7   | 5   | --     | --           |
|            | Ca(ICC2/PI489777)SNP_36556 | 3625 | T | A | 7   | 5   | --     | --           |
| CakTC40227 | Ca(ICC2/PI489777)SNP_36557 | 475  | G | A | 11  | 3   | --     | --           |
|            | Ca(ICC2/PI489777)SNP_36558 | 585  | T | C | 10  | 4   | --     | --           |
|            | Ca(ICC2/PI489777)SNP_36559 | 608  | C | G | 10  | 4   | --     | --           |
| CakTC32198 | Ca(ICC2/PI489777)SNP_36560 | 1370 | G | A | 4   | 5   | --     | --           |
| CakTC35921 | Ca(ICC2/PI489777)SNP_36561 | 2048 | T | C | 4   | 4   | --     | --           |
|            | Ca(ICC2/PI489777)SNP_36562 | 2755 | C | T | 7   | 5   | --     | --           |
|            | Ca(ICC2/PI489777)SNP_36563 | 4040 | A | G | 9   | 6   | --     | --           |
| CakTC23000 | Ca(ICC2/PI489777)SNP_36564 | 676  | A | T | 16  | 4   | --     | --           |
|            | Ca(ICC2/PI489777)SNP_36565 | 945  | C | T | 7   | 4   | --     | --           |
|            | Ca(ICC2/PI489777)SNP_36566 | 1080 | T | G | 6   | 4   | --     | --           |
|            | Ca(ICC2/PI489777)SNP_36567 | 1194 | A | G | 11  | 4   | --     | --           |
| CakTC31815 | Ca(ICC2/PI489777)SNP_36568 | 455  | A | T | 17  | 5   | --     | --           |
|            | Ca(ICC2/PI489777)SNP_36569 | 641  | A | G | 10  | 7   | --     | --           |
|            | Ca(ICC2/PI489777)SNP_36570 | 1067 | C | T | 3   | 5   | --     | --           |
|            | Ca(ICC2/PI489777)SNP_36571 | 1304 | A | G | 7   | 3   | --     | --           |
| CakTC38549 | Ca(ICC2/PI489777)SNP_36572 | 49   | A | T | 6   | 7   | --     | --           |
|            | Ca(ICC2/PI489777)SNP_36573 | 66   | C | A | 8   | 7   | --     | --           |
|            | Ca(ICC2/PI489777)SNP_36574 | 158  | C | T | 10  | 7   | --     | --           |
|            | Ca(ICC2/PI489777)SNP_36575 | 254  | A | G | 10  | 7   | --     | --           |
|            | Ca(ICC2/PI489777)SNP_36576 | 875  | A | G | 29  | 28  | --     | --           |
|            | Ca(ICC2/PI489777)SNP_36577 | 940  | A | C | 25  | 27  | --     | --           |
|            | Ca(ICC2/PI489777)SNP_36578 | 1057 | A | G | 9   | 7   | --     | --           |
| CakTC23952 | Ca(ICC2/PI489777)SNP_36579 | 245  | A | G | 13  | 5   | --     | --           |
| CakTC40788 | Ca(ICC2/PI489777)SNP_36580 | 364  | G | A | 5   | 7   | --     | --           |
|            | Ca(ICC2/PI489777)SNP_36581 | 465  | T | A | 10  | 9   | --     | --           |
| CakTC06279 | Ca(ICC2/PI489777)SNP_36582 | 420  | T | C | 17  | 6   | --     | --           |
|            | Ca(ICC2/PI489777)SNP_36583 | 565  | A | G | 13  | 6   | --     | --           |
|            | Ca(ICC2/PI489777)SNP_36584 | 766  | C | G | 22  | 6   | --     | --           |
| CakTC27096 | Ca(ICC2/PI489777)SNP_36585 | 176  | T | C | 80  | 123 | --     | --           |
|            | Ca(ICC2/PI489777)SNP_36586 | 220  | G | A | 78  | 109 | --     | --           |
| CakTC28891 | Ca(ICC2/PI489777)SNP_36587 | 152  | A | G | 3   | 4   | --     | --           |
|            | Ca(ICC2/PI489777)SNP_36588 | 300  | A | G | 4   | 4   | --     | --           |
| CakTC38661 | Ca(ICC2/PI489777)SNP_36589 | 581  | G | A | 16  | 18  | --     | --           |
|            | Ca(ICC2/PI489777)SNP_36590 | 866  | G | A | 20  | 3   | --     | --           |
| CakTC41799 | Ca(ICC2/PI489777)SNP_36591 | 1491 | C | T | 9   | 14  | --     | --           |
|            | Ca(ICC2/PI489777)SNP_36592 | 1494 | A | G | 10  | 14  | --     | --           |
| CakTC15524 | Ca(ICC2/PI489777)SNP_36593 | 1159 | G | A | 5   | 4   | --     | --           |
|            | Ca(ICC2/PI489777)SNP_36594 | 1174 | T | C | 5   | 5   | --     | --           |
|            | Ca(ICC2/PI489777)SNP_36595 | 1189 | G | A | 5   | 5   | --     | --           |
| CakTC24518 | Ca(ICC2/PI489777)SNP_36596 | 307  | G | A | 14  | 8   | --     | --           |
|            | Ca(ICC2/PI489777)SNP_36597 | 558  | T | C | 17  | 6   | --     | --           |
|            | Ca(ICC2/PI489777)SNP_36598 | 2436 | G | A | 103 | 89  | --     | --           |
|            | Ca(ICC2/PI489777)SNP_36599 | 2842 | C | G | 8   | 3   | --     | --           |
|            | Ca(ICC2/PI489777)SNP_36600 | 2866 | G | T | 4   | 3   | --     | --           |
| CakTC26557 | Ca(ICC2/PI489777)SNP_36601 | 2282 | A | G | 20  | 26  | --     | --           |
| CakTC39875 | Ca(ICC2/PI489777)SNP_36602 | 96   | A | T | 16  | 3   | --     | --           |
|            | Ca(ICC2/PI489777)SNP_36603 | 402  | C | G | 45  | 10  | --     | --           |
|            | Ca(ICC2/PI489777)SNP_36604 | 655  | T | C | 34  | 6   | --     | --           |
| CakTC25123 | Ca(ICC2/PI489777)SNP_36605 | 166  | A | T | 9   | 4   | --     | --           |
|            | Ca(ICC2/PI489777)SNP_36606 | 210  | C | T | 9   | 4   | --     | --           |
|            | Ca(ICC2/PI489777)SNP_36607 | 278  | A | T | 13  | 5   | --     | --           |
|            | Ca(ICC2/PI489777)SNP_36608 | 631  | A | C | 15  | 10  | --     | --           |
| CakTC33598 | Ca(ICC2/PI489777)SNP_36609 | 564  | T | C | 4   | 3   | Flower | bud          |
|            | Ca(ICC2/PI489777)SNP_36610 | 654  | T | C | 4   | 4   | Flower | bud          |
|            | Ca(ICC2/PI489777)SNP_36611 | 717  | A | G | 4   | 3   | Flower | bud          |
| CakTC22521 | Ca(ICC2/PI489777)SNP_36612 | 626  | A | T | 4   | 4   | --     | W1/SNF-BAF60 |
| CakTC28747 | Ca(ICC2/PI489777)SNP_36613 | 170  | T | G | 28  | 15  | --     | --           |
|            | Ca(ICC2/PI489777)SNP_36614 | 372  | G | T | 36  | 17  | --     | --           |
|            | Ca(ICC2/PI489777)SNP_36615 | 555  | C | T | 30  | 17  | --     | --           |
|            | Ca(ICC2/PI489777)SNP_36616 | 573  | A | G | 25  | 16  | --     | --           |
|            | Ca(ICC2/PI489777)SNP_36617 | 615  | G | A | 24  | 15  | --     | --           |
|            | Ca(ICC2/PI489777)SNP_36618 | 687  | T | A | 19  | 15  | --     | --           |
|            | Ca(ICC2/PI489777)SNP_36619 | 710  | C | A | 26  | 15  | --     | --           |
|            | Ca(ICC2/PI489777)SNP_36620 | 1542 | T | G | 12  | 3   | --     | --           |
| CakTC40901 | Ca(ICC2/PI489777)SNP_36621 | 20   | G | A | 15  | 9   | --     | --           |
|            | Ca(ICC2/PI489777)SNP_36622 | 657  | C | T | 55  | 32  | --     | --           |
| CakTC15096 | Ca(ICC2/PI489777)SNP_36623 | 417  | G | T | 76  | 23  | --     | --           |
| CakTC31868 | Ca(ICC2/PI489777)SNP_36624 | 1208 | C | G | 11  | 6   | Shoot  | MYB          |
|            | Ca(ICC2/PI489777)SNP_36625 | 1391 | T | A | 13  | 7   | Shoot  | MYB          |

|            |                             |      |   |   |    |    |        |            |
|------------|-----------------------------|------|---|---|----|----|--------|------------|
|            | Ca(ICCV2/PI489777)SNP_36626 | 1413 | T | A | 11 | 7  | Shoot  | MYB        |
|            | Ca(ICCV2/PI489777)SNP_36627 | 1688 | A | C | 5  | 3  | Shoot  | MYB        |
|            | Ca(ICCV2/PI489777)SNP_36628 | 1735 | C | T | 4  | 3  | Shoot  | MYB        |
| CakTC27988 | Ca(ICCV2/PI489777)SNP_36629 | 2257 | C | T | 24 | 16 | --     | --         |
| CakTC27960 | Ca(ICCV2/PI489777)SNP_36630 | 1132 | C | T | 19 | 5  | --     | --         |
|            | Ca(ICCV2/PI489777)SNP_36631 | 1343 | G | T | 17 | 10 | --     | --         |
| CakTC41169 | Ca(ICCV2/PI489777)SNP_36632 | 292  | A | G | 16 | 4  | --     | --         |
|            | Ca(ICCV2/PI489777)SNP_36633 | 334  | T | C | 19 | 3  | --     | --         |
|            | Ca(ICCV2/PI489777)SNP_36634 | 1314 | T | C | 18 | 4  | --     | --         |
|            | Ca(ICCV2/PI489777)SNP_36635 | 1545 | C | T | 8  | 4  | --     | --         |
| CakTC24491 | Ca(ICCV2/PI489777)SNP_36636 | 911  | A | C | 29 | 17 | --     | --         |
| CakTC43263 | Ca(ICCV2/PI489777)SNP_36637 | 343  | C | T | 7  | 6  | --     | --         |
| CakTC31651 | Ca(ICCV2/PI489777)SNP_36638 | 175  | T | C | 14 | 6  | --     | --         |
|            | Ca(ICCV2/PI489777)SNP_36639 | 208  | G | A | 14 | 9  | --     | --         |
| CakTC31114 | Ca(ICCV2/PI489777)SNP_36640 | 231  | T | A | 4  | 5  | --     | TRAF       |
|            | Ca(ICCV2/PI489777)SNP_36641 | 398  | A | C | 5  | 7  | --     | TRAF       |
|            | Ca(ICCV2/PI489777)SNP_36642 | 470  | G | A | 7  | 5  | --     | TRAF       |
|            | Ca(ICCV2/PI489777)SNP_36643 | 494  | A | T | 5  | 4  | --     | TRAF       |
|            | Ca(ICCV2/PI489777)SNP_36644 | 495  | T | A | 5  | 4  | --     | TRAF       |
|            | Ca(ICCV2/PI489777)SNP_36645 | 755  | A | T | 6  | 7  | --     | TRAF       |
|            | Ca(ICCV2/PI489777)SNP_36646 | 763  | C | T | 5  | 7  | --     | TRAF       |
| CakTC12553 | Ca(ICCV2/PI489777)SNP_36647 | 468  | T | C | 7  | 15 | --     | AUX/IAA    |
|            | Ca(ICCV2/PI489777)SNP_36648 | 575  | T | G | 4  | 18 | --     | AUX/IAA    |
|            | Ca(ICCV2/PI489777)SNP_36649 | 674  | C | T | 10 | 16 | --     | AUX/IAA    |
|            | Ca(ICCV2/PI489777)SNP_36650 | 718  | C | G | 10 | 11 | --     | AUX/IAA    |
|            | Ca(ICCV2/PI489777)SNP_36651 | 826  | G | C | 7  | 8  | --     | AUX/IAA    |
| CakTC27015 | Ca(ICCV2/PI489777)SNP_36652 | 1967 | C | A | 83 | 87 | --     | --         |
| CakTC37282 | Ca(ICCV2/PI489777)SNP_36653 | 1545 | T | C | 22 | 6  | --     | --         |
|            | Ca(ICCV2/PI489777)SNP_36654 | 1576 | C | A | 21 | 5  | --     | --         |
|            | Ca(ICCV2/PI489777)SNP_36655 | 1581 | T | C | 22 | 6  | --     | --         |
|            | Ca(ICCV2/PI489777)SNP_36656 | 1649 | T | C | 22 | 6  | --     | --         |
|            | Ca(ICCV2/PI489777)SNP_36657 | 1651 | G | A | 22 | 6  | --     | --         |
|            | Ca(ICCV2/PI489777)SNP_36658 | 1747 | A | T | 18 | 4  | --     | --         |
| CakTC36815 | Ca(ICCV2/PI489777)SNP_36659 | 1009 | G | T | 4  | 3  | --     | --         |
|            | Ca(ICCV2/PI489777)SNP_36660 | 2176 | G | C | 3  | 4  | --     | --         |
|            | Ca(ICCV2/PI489777)SNP_36661 | 2338 | G | C | 3  | 3  | --     | --         |
|            | Ca(ICCV2/PI489777)SNP_36662 | 3170 | T | C | 5  | 3  | --     | --         |
| CakTC10978 | Ca(ICCV2/PI489777)SNP_36663 | 486  | T | G | 9  | 6  | --     | --         |
|            | Ca(ICCV2/PI489777)SNP_36664 | 606  | A | T | 8  | 4  | --     | --         |
|            | Ca(ICCV2/PI489777)SNP_36665 | 843  | T | G | 7  | 6  | --     | --         |
|            | Ca(ICCV2/PI489777)SNP_36666 | 1161 | C | A | 4  | 6  | --     | --         |
|            | Ca(ICCV2/PI489777)SNP_36667 | 1260 | C | A | 4  | 5  | --     | --         |
|            | Ca(ICCV2/PI489777)SNP_36668 | 1300 | A | G | 3  | 4  | --     | --         |
| CakTC26635 | Ca(ICCV2/PI489777)SNP_36669 | 269  | G | C | 6  | 5  | --     | Alfin-like |
|            | Ca(ICCV2/PI489777)SNP_36670 | 3062 | C | T | 4  | 3  | --     | Alfin-like |
| CakTC43275 | Ca(ICCV2/PI489777)SNP_36671 | 861  | G | A | 32 | 22 | --     | --         |
| CakTC38863 | Ca(ICCV2/PI489777)SNP_36672 | 190  | A | G | 8  | 6  | Flower | bud        |
|            | Ca(ICCV2/PI489777)SNP_36673 | 414  | T | C | 38 | 18 | Flower | bud        |
|            | Ca(ICCV2/PI489777)SNP_36674 | 948  | A | C | 62 | 43 | Flower | bud        |
|            | Ca(ICCV2/PI489777)SNP_36675 | 1036 | T | C | 78 | 36 | Flower | bud        |
|            | Ca(ICCV2/PI489777)SNP_36676 | 1050 | C | T | 85 | 37 | Flower | bud        |
|            | Ca(ICCV2/PI489777)SNP_36677 | 1194 | A | G | 81 | 34 | Flower | bud        |
|            | Ca(ICCV2/PI489777)SNP_36678 | 1237 | G | A | 61 | 29 | Flower | bud        |
| CakTC38143 | Ca(ICCV2/PI489777)SNP_36679 | 645  | T | C | 39 | 19 | --     | --         |
|            | Ca(ICCV2/PI489777)SNP_36680 | 939  | T | G | 37 | 23 | --     | --         |
| CakTC38000 | Ca(ICCV2/PI489777)SNP_36681 | 20   | C | A | 4  | 3  | --     | --         |
|            | Ca(ICCV2/PI489777)SNP_36682 | 363  | G | A | 14 | 11 | --     | --         |
|            | Ca(ICCV2/PI489777)SNP_36683 | 576  | T | G | 8  | 7  | --     | --         |
|            | Ca(ICCV2/PI489777)SNP_36684 | 717  | C | G | 6  | 3  | --     | --         |
| CakTC10143 | Ca(ICCV2/PI489777)SNP_36685 | 1139 | C | T | 4  | 4  | --     | --         |
|            | Ca(ICCV2/PI489777)SNP_36686 | 1140 | A | G | 4  | 4  | --     | --         |
|            | Ca(ICCV2/PI489777)SNP_36687 | 1298 | C | T | 5  | 3  | --     | --         |
| CakTC30999 | Ca(ICCV2/PI489777)SNP_36688 | 489  | C | T | 12 | 3  | --     | HB         |
|            | Ca(ICCV2/PI489777)SNP_36689 | 692  | G | C | 3  | 4  | --     | HB         |
| CakTC42001 | Ca(ICCV2/PI489777)SNP_36690 | 54   | G | C | 6  | 4  | --     | --         |
|            | Ca(ICCV2/PI489777)SNP_36691 | 173  | T | C | 17 | 12 | --     | --         |
|            | Ca(ICCV2/PI489777)SNP_36692 | 529  | T | G | 22 | 16 | --     | --         |
|            | Ca(ICCV2/PI489777)SNP_36693 | 569  | T | C | 18 | 12 | --     | --         |
|            | Ca(ICCV2/PI489777)SNP_36694 | 610  | G | A | 16 | 12 | --     | --         |
|            | Ca(ICCV2/PI489777)SNP_36695 | 901  | T | C | 21 | 19 | --     | --         |
|            | Ca(ICCV2/PI489777)SNP_36696 | 907  | C | T | 21 | 20 | --     | --         |
|            | Ca(ICCV2/PI489777)SNP_36697 | 1552 | G | T | 18 | 8  | --     | --         |
| CakTC37892 | Ca(ICCV2/PI489777)SNP_36698 | 207  | G | C | 8  | 5  | --     | --         |
|            | Ca(ICCV2/PI489777)SNP_36699 | 386  | A | G | 9  | 6  | --     | --         |



|            |                            |      |   |   |     |    |    |             |
|------------|----------------------------|------|---|---|-----|----|----|-------------|
|            | Ca(ICC2/PI489777)SNP_36700 | 514  | A | C | 12  | 5  | -- | --          |
|            | Ca(ICC2/PI489777)SNP_36701 | 744  | A | C | 16  | 3  | -- | --          |
| CakTC40589 | Ca(ICC2/PI489777)SNP_36702 | 16   | C | A | 29  | 37 | -- | --          |
|            | Ca(ICC2/PI489777)SNP_36703 | 29   | A | T | 29  | 50 | -- | --          |
|            | Ca(ICC2/PI489777)SNP_36704 | 62   | A | C | 38  | 54 | -- | --          |
|            | Ca(ICC2/PI489777)SNP_36705 | 120  | A | T | 43  | 68 | -- | --          |
|            | Ca(ICC2/PI489777)SNP_36706 | 203  | A | T | 45  | 74 | -- | --          |
|            | Ca(ICC2/PI489777)SNP_36707 | 217  | C | T | 48  | 61 | -- | --          |
|            | Ca(ICC2/PI489777)SNP_36708 | 501  | G | A | 11  | 77 | -- | --          |
|            | Ca(ICC2/PI489777)SNP_36709 | 589  | A | C | 6   | 50 | -- | --          |
| CakTC25472 | Ca(ICC2/PI489777)SNP_36710 | 232  | G | A | 35  | 7  | -- | --          |
|            | Ca(ICC2/PI489777)SNP_36711 | 247  | T | C | 33  | 8  | -- | --          |
|            | Ca(ICC2/PI489777)SNP_36712 | 949  | A | G | 11  | 3  | -- | --          |
| CakTC40076 | Ca(ICC2/PI489777)SNP_36713 | 76   | A | G | 7   | 18 | -- | --          |
|            | Ca(ICC2/PI489777)SNP_36714 | 104  | C | T | 10  | 27 | -- | --          |
|            | Ca(ICC2/PI489777)SNP_36715 | 130  | C | A | 11  | 23 | -- | --          |
|            | Ca(ICC2/PI489777)SNP_36716 | 295  | G | A | 12  | 50 | -- | --          |
|            | Ca(ICC2/PI489777)SNP_36717 | 1038 | C | T | 9   | 17 | -- | --          |
|            | Ca(ICC2/PI489777)SNP_36718 | 1171 | T | A | 6   | 4  | -- | --          |
|            | Ca(ICC2/PI489777)SNP_36719 | 1180 | A | C | 6   | 4  | -- | --          |
| CakTC31420 | Ca(ICC2/PI489777)SNP_36720 | 418  | C | T | 5   | 3  | -- | --          |
| CakTC38886 | Ca(ICC2/PI489777)SNP_36721 | 231  | A | C | 9   | 6  | -- | --          |
|            | Ca(ICC2/PI489777)SNP_36722 | 276  | A | C | 25  | 23 | -- | --          |
|            | Ca(ICC2/PI489777)SNP_36723 | 828  | T | C | 33  | 20 | -- | --          |
|            | Ca(ICC2/PI489777)SNP_36724 | 901  | T | G | 32  | 17 | -- | --          |
| CakTC37929 | Ca(ICC2/PI489777)SNP_36725 | 158  | A | G | 22  | 6  | -- | C2C2-GATA   |
|            | Ca(ICC2/PI489777)SNP_36726 | 225  | T | C | 21  | 7  | -- | C2C2-GATA   |
|            | Ca(ICC2/PI489777)SNP_36727 | 888  | G | A | 5   | 8  | -- | C2C2-GATA   |
| CakTC30671 | Ca(ICC2/PI489777)SNP_36728 | 266  | A | T | 13  | 8  | -- | --          |
|            | Ca(ICC2/PI489777)SNP_36729 | 885  | G | A | 12  | 12 | -- | --          |
|            | Ca(ICC2/PI489777)SNP_36730 | 900  | T | C | 11  | 13 | -- | --          |
|            | Ca(ICC2/PI489777)SNP_36731 | 1294 | A | G | 17  | 17 | -- | --          |
|            | Ca(ICC2/PI489777)SNP_36732 | 1309 | C | T | 17  | 16 | -- | --          |
| CakTC29070 | Ca(ICC2/PI489777)SNP_36733 | 213  | G | A | 3   | 3  | -- | --          |
|            | Ca(ICC2/PI489777)SNP_36734 | 367  | G | A | 5   | 4  | -- | --          |
|            | Ca(ICC2/PI489777)SNP_36735 | 440  | C | A | 6   | 4  | -- | --          |
|            | Ca(ICC2/PI489777)SNP_36736 | 911  | C | A | 6   | 5  | -- | --          |
|            | Ca(ICC2/PI489777)SNP_36737 | 1046 | T | A | 14  | 6  | -- | --          |
|            | Ca(ICC2/PI489777)SNP_36738 | 1073 | T | C | 15  | 7  | -- | --          |
|            | Ca(ICC2/PI489777)SNP_36739 | 1114 | T | C | 15  | 7  | -- | --          |
|            | Ca(ICC2/PI489777)SNP_36740 | 1187 | G | T | 9   | 6  | -- | --          |
|            | Ca(ICC2/PI489777)SNP_36741 | 1214 | T | C | 11  | 6  | -- | --          |
|            | Ca(ICC2/PI489777)SNP_36742 | 1357 | C | G | 9   | 3  | -- | --          |
| CakTC39678 | Ca(ICC2/PI489777)SNP_36743 | 143  | T | C | 11  | 12 | -- | --          |
|            | Ca(ICC2/PI489777)SNP_36744 | 1294 | C | G | 26  | 16 | -- | --          |
|            | Ca(ICC2/PI489777)SNP_36745 | 1437 | G | A | 6   | 5  | -- | --          |
| CakTC10176 | Ca(ICC2/PI489777)SNP_36746 | 256  | C | T | 3   | 7  | -- | --          |
|            | Ca(ICC2/PI489777)SNP_36747 | 418  | C | T | 4   | 4  | -- | --          |
| CakTC40480 | Ca(ICC2/PI489777)SNP_36748 | 784  | C | T | 5   | 4  | -- | Bromodomain |
|            | Ca(ICC2/PI489777)SNP_36749 | 907  | C | T | 7   | 3  | -- | Bromodomain |
|            | Ca(ICC2/PI489777)SNP_36750 | 1123 | T | A | 10  | 4  | -- | Bromodomain |
|            | Ca(ICC2/PI489777)SNP_36751 | 1383 | A | T | 7   | 8  | -- | Bromodomain |
| CakTC05201 | Ca(ICC2/PI489777)SNP_36752 | 810  | G | A | 3   | 5  | -- | --          |
| CakTC38156 | Ca(ICC2/PI489777)SNP_36753 | 534  | T | C | 145 | 47 | -- | --          |
|            | Ca(ICC2/PI489777)SNP_36754 | 564  | C | T | 188 | 54 | -- | --          |
|            | Ca(ICC2/PI489777)SNP_36755 | 1413 | G | C | 24  | 11 | -- | --          |
| CakTC23318 | Ca(ICC2/PI489777)SNP_36756 | 499  | A | C | 37  | 9  | -- | --          |
| CakTC14037 | Ca(ICC2/PI489777)SNP_36757 | 1002 | C | G | 9   | 5  | -- | --          |
|            | Ca(ICC2/PI489777)SNP_36758 | 1086 | T | G | 8   | 3  | -- | --          |
|            | Ca(ICC2/PI489777)SNP_36759 | 1260 | T | G | 5   | 3  | -- | --          |
| CakTC41714 | Ca(ICC2/PI489777)SNP_36760 | 1341 | T | C | 14  | 6  | -- | ARR-B       |
|            | Ca(ICC2/PI489777)SNP_36761 | 1376 | T | C | 16  | 6  | -- | ARR-B       |
|            | Ca(ICC2/PI489777)SNP_36762 | 1431 | A | G | 15  | 3  | -- | ARR-B       |
|            | Ca(ICC2/PI489777)SNP_36763 | 2040 | T | A | 4   | 5  | -- | ARR-B       |
|            | Ca(ICC2/PI489777)SNP_36764 | 2104 | T | C | 4   | 4  | -- | ARR-B       |
|            | Ca(ICC2/PI489777)SNP_36765 | 2111 | G | C | 4   | 3  | -- | ARR-B       |
|            | Ca(ICC2/PI489777)SNP_36766 | 2230 | G | A | 6   | 3  | -- | ARR-B       |
| CakTC33672 | Ca(ICC2/PI489777)SNP_36767 | 1405 | C | T | 21  | 10 | -- | --          |
| CakTC26029 | Ca(ICC2/PI489777)SNP_36768 | 375  | C | T | 5   | 3  | -- | --          |
|            | Ca(ICC2/PI489777)SNP_36769 | 816  | A | G | 10  | 6  | -- | --          |
|            | Ca(ICC2/PI489777)SNP_36770 | 1017 | A | T | 10  | 7  | -- | --          |
|            | Ca(ICC2/PI489777)SNP_36771 | 1077 | A | C | 9   | 5  | -- | --          |
| CakTC39689 | Ca(ICC2/PI489777)SNP_36772 | 266  | G | A | 8   | 3  | -- | --          |
| CakTC38461 | Ca(ICC2/PI489777)SNP_36773 | 403  | A | G | 7   | 4  | -- | --          |

|            |                            |      |   |   |     |     |           |          |
|------------|----------------------------|------|---|---|-----|-----|-----------|----------|
|            | Ca(ICC2/PI489777)SNP_36774 | 558  | A | G | 4   | 3   | --        | --       |
| CakTC32868 | Ca(ICC2/PI489777)SNP_36775 | 163  | T | A | 16  | 12  | --        | --       |
|            | Ca(ICC2/PI489777)SNP_36776 | 257  | C | T | 16  | 14  | --        | --       |
|            | Ca(ICC2/PI489777)SNP_36777 | 359  | T | G | 17  | 15  | --        | --       |
|            | Ca(ICC2/PI489777)SNP_36778 | 393  | A | G | 16  | 17  | --        | --       |
|            | Ca(ICC2/PI489777)SNP_36779 | 1094 | G | T | 23  | 13  | --        | --       |
|            | Ca(ICC2/PI489777)SNP_36780 | 1289 | A | G | 21  | 9   | --        | --       |
|            | Ca(ICC2/PI489777)SNP_36781 | 1337 | A | G | 17  | 8   | --        | --       |
|            | Ca(ICC2/PI489777)SNP_36782 | 1586 | C | T | 18  | 9   | --        | --       |
|            | Ca(ICC2/PI489777)SNP_36783 | 1757 | C | T | 19  | 17  | --        | --       |
|            | Ca(ICC2/PI489777)SNP_36784 | 1784 | A | G | 20  | 17  | --        | --       |
|            | Ca(ICC2/PI489777)SNP_36785 | 2588 | C | T | 37  | 15  | --        | --       |
|            | Ca(ICC2/PI489777)SNP_36786 | 2730 | T | C | 27  | 11  | --        | --       |
| CakTC33456 | Ca(ICC2/PI489777)SNP_36787 | 645  | C | T | 4   | 3   | --        | Trihelix |
|            | Ca(ICC2/PI489777)SNP_36788 | 648  | C | T | 4   | 3   | --        | Trihelix |
|            | Ca(ICC2/PI489777)SNP_36789 | 1311 | T | G | 8   | 8   | --        | Trihelix |
| CakTC40031 | Ca(ICC2/PI489777)SNP_36790 | 1422 | C | T | 5   | 12  | --        | --       |
| CakTC26038 | Ca(ICC2/PI489777)SNP_36791 | 1248 | G | T | 44  | 27  | --        | --       |
| CakTC32548 | Ca(ICC2/PI489777)SNP_36792 | 339  | G | A | 9   | 12  | --        | --       |
| CakTC25566 | Ca(ICC2/PI489777)SNP_36793 | 888  | G | A | 11  | 5   | --        | --       |
|            | Ca(ICC2/PI489777)SNP_36794 | 889  | A | T | 11  | 5   | --        | --       |
| CakTC37183 | Ca(ICC2/PI489777)SNP_36795 | 2368 | A | G | 5   | 7   | --        | --       |
|            | Ca(ICC2/PI489777)SNP_36796 | 3058 | G | A | 9   | 6   | --        | --       |
| CakTC32259 | Ca(ICC2/PI489777)SNP_36797 | 1354 | C | T | 5   | 8   | --        | --       |
| CakTC37173 | Ca(ICC2/PI489777)SNP_36798 | 183  | A | C | 4   | 9   | Young_pod | --       |
| CakTC12137 | Ca(ICC2/PI489777)SNP_36799 | 155  | C | T | 8   | 5   | --        | --       |
|            | Ca(ICC2/PI489777)SNP_36800 | 460  | A | G | 17  | 15  | --        | --       |
|            | Ca(ICC2/PI489777)SNP_36801 | 595  | A | G | 21  | 11  | --        | --       |
| CakTC32884 | Ca(ICC2/PI489777)SNP_36802 | 2684 | G | T | 5   | 13  | --        | TPR      |
| CakTC23857 | Ca(ICC2/PI489777)SNP_36803 | 998  | G | A | 10  | 3   | --        | --       |
|            | Ca(ICC2/PI489777)SNP_36804 | 1028 | C | T | 10  | 3   | --        | --       |
|            | Ca(ICC2/PI489777)SNP_36805 | 1505 | G | A | 10  | 6   | --        | --       |
| CakTC23341 | Ca(ICC2/PI489777)SNP_36806 | 526  | G | A | 178 | 96  | --        | --       |
|            | Ca(ICC2/PI489777)SNP_36807 | 991  | T | C | 313 | 156 | --        | --       |
|            | Ca(ICC2/PI489777)SNP_36808 | 1057 | A | C | 328 | 148 | --        | --       |
|            | Ca(ICC2/PI489777)SNP_36809 | 1897 | C | T | 303 | 166 | --        | --       |
| CakTC22102 | Ca(ICC2/PI489777)SNP_36810 | 1037 | C | T | 6   | 3   | --        | --       |
| CakTC29029 | Ca(ICC2/PI489777)SNP_36811 | 737  | G | A | 22  | 14  | --        | --       |
|            | Ca(ICC2/PI489777)SNP_36812 | 1653 | C | T | 15  | 8   | --        | --       |
|            | Ca(ICC2/PI489777)SNP_36813 | 1767 | G | A | 19  | 7   | --        | --       |
| CakTC27201 | Ca(ICC2/PI489777)SNP_36814 | 298  | C | G | 38  | 5   | --        | ARF      |
| CakTC11415 | Ca(ICC2/PI489777)SNP_36815 | 170  | T | C | 10  | 4   | --        | --       |
| CakTC38103 | Ca(ICC2/PI489777)SNP_36816 | 320  | A | G | 16  | 6   | --        | --       |
|            | Ca(ICC2/PI489777)SNP_36817 | 495  | C | T | 20  | 6   | --        | --       |
|            | Ca(ICC2/PI489777)SNP_36818 | 736  | A | G | 22  | 12  | --        | --       |
|            | Ca(ICC2/PI489777)SNP_36819 | 755  | T | A | 24  | 11  | --        | --       |
| CakTC37228 | Ca(ICC2/PI489777)SNP_36820 | 653  | C | A | 21  | 16  | --        | --       |
|            | Ca(ICC2/PI489777)SNP_36821 | 892  | G | C | 33  | 14  | --        | --       |
| CakTC35591 | Ca(ICC2/PI489777)SNP_36822 | 212  | T | C | 6   | 5   | --        | --       |
| CakTC30882 | Ca(ICC2/PI489777)SNP_36823 | 1222 | A | T | 4   | 5   | --        | Trihelix |
| CakTC30468 | Ca(ICC2/PI489777)SNP_36824 | 273  | A | C | 4   | 3   | --        | --       |
| CakTC26032 | Ca(ICC2/PI489777)SNP_36825 | 2654 | C | G | 3   | 3   | --        | --       |
| CakTC34349 | Ca(ICC2/PI489777)SNP_36826 | 1494 | T | C | 31  | 9   | --        | --       |
| CakTC33148 | Ca(ICC2/PI489777)SNP_36827 | 1649 | G | A | 6   | 3   | Young_pod | FAR1     |
|            | Ca(ICC2/PI489777)SNP_36828 | 1885 | T | C | 11  | 5   | Young_pod | FAR1     |
| CakTC23065 | Ca(ICC2/PI489777)SNP_36829 | 894  | A | G | 4   | 3   | --        | mTERF    |
|            | Ca(ICC2/PI489777)SNP_36830 | 905  | G | T | 4   | 3   | --        | mTERF    |
|            | Ca(ICC2/PI489777)SNP_36831 | 931  | G | C | 4   | 3   | --        | mTERF    |
|            | Ca(ICC2/PI489777)SNP_36832 | 1040 | C | T | 4   | 4   | --        | mTERF    |
|            | Ca(ICC2/PI489777)SNP_36833 | 1067 | A | G | 4   | 3   | --        | mTERF    |
| CakTC42090 | Ca(ICC2/PI489777)SNP_36834 | 598  | C | A | 135 | 147 | --        | --       |
|            | Ca(ICC2/PI489777)SNP_36835 | 841  | G | A | 114 | 119 | --        | --       |
|            | Ca(ICC2/PI489777)SNP_36836 | 890  | C | G | 104 | 93  | --        | --       |
| CakTC43207 | Ca(ICC2/PI489777)SNP_36837 | 485  | A | G | 25  | 10  | --        | --       |
|            | Ca(ICC2/PI489777)SNP_36838 | 976  | T | C | 7   | 8   | --        | --       |
|            | Ca(ICC2/PI489777)SNP_36839 | 1033 | T | C | 7   | 5   | --        | --       |
|            | Ca(ICC2/PI489777)SNP_36840 | 1219 | C | T | 8   | 8   | --        | --       |
| CakTC35122 | Ca(ICC2/PI489777)SNP_36841 | 1325 | A | G | 10  | 9   | --        | --       |
| CakTC11165 | Ca(ICC2/PI489777)SNP_36842 | 476  | T | C | 9   | 4   | --        | --       |
|            | Ca(ICC2/PI489777)SNP_36843 | 569  | C | T | 9   | 4   | --        | --       |
|            | Ca(ICC2/PI489777)SNP_36844 | 677  | C | T | 9   | 4   | --        | --       |
|            | Ca(ICC2/PI489777)SNP_36845 | 1436 | T | G | 5   | 10  | --        | --       |
|            | Ca(ICC2/PI489777)SNP_36846 | 1625 | G | A | 6   | 11  | --        | --       |
| CakTC34171 | Ca(ICC2/PI489777)SNP_36847 | 192  | G | T | 5   | 8   | --        | --       |

|            |                            |      |   |   |     |     |        |      |
|------------|----------------------------|------|---|---|-----|-----|--------|------|
| CakTC12273 | Ca(ICC2/P1489777)SNP_36848 | 307  | A | T | 4   | 3   | --     | --   |
| CakTC34280 | Ca(ICC2/P1489777)SNP_36849 | 96   | A | G | 71  | 46  | Shoot  | --   |
|            | Ca(ICC2/P1489777)SNP_36850 | 162  | A | G | 93  | 50  | Shoot  | --   |
|            | Ca(ICC2/P1489777)SNP_36851 | 204  | T | G | 98  | 45  | Shoot  | --   |
|            | Ca(ICC2/P1489777)SNP_36852 | 231  | T | C | 97  | 49  | Shoot  | --   |
|            | Ca(ICC2/P1489777)SNP_36853 | 234  | A | T | 97  | 50  | Shoot  | --   |
|            | Ca(ICC2/P1489777)SNP_36854 | 357  | T | C | 86  | 46  | Shoot  | --   |
|            | Ca(ICC2/P1489777)SNP_36855 | 366  | T | G | 83  | 47  | Shoot  | --   |
|            | Ca(ICC2/P1489777)SNP_36856 | 381  | G | A | 77  | 43  | Shoot  | --   |
|            | Ca(ICC2/P1489777)SNP_36857 | 382  | G | A | 69  | 43  | Shoot  | --   |
|            | Ca(ICC2/P1489777)SNP_36858 | 428  | T | C | 53  | 35  | Shoot  | --   |
| CakTC34190 | Ca(ICC2/P1489777)SNP_36859 | 336  | G | T | 3   | 6   | Root   | --   |
|            | Ca(ICC2/P1489777)SNP_36860 | 1314 | T | A | 3   | 4   | Root   | --   |
|            | Ca(ICC2/P1489777)SNP_36861 | 1562 | G | A | 4   | 3   | Root   | --   |
|            | Ca(ICC2/P1489777)SNP_36862 | 1646 | G | A | 7   | 4   | Root   | --   |
| CakTC40954 | Ca(ICC2/P1489777)SNP_36863 | 181  | G | A | 8   | 7   | --     | --   |
| CakTC42700 | Ca(ICC2/P1489777)SNP_36864 | 336  | C | T | 16  | 28  | --     | --   |
|            | Ca(ICC2/P1489777)SNP_36865 | 376  | C | T | 24  | 38  | --     | --   |
|            | Ca(ICC2/P1489777)SNP_36866 | 742  | A | T | 51  | 27  | --     | --   |
| CakTC38981 | Ca(ICC2/P1489777)SNP_36867 | 97   | C | A | 4   | 3   | --     | --   |
|            | Ca(ICC2/P1489777)SNP_36868 | 221  | T | G | 6   | 3   | --     | --   |
|            | Ca(ICC2/P1489777)SNP_36869 | 288  | T | C | 7   | 4   | --     | --   |
|            | Ca(ICC2/P1489777)SNP_36870 | 597  | G | C | 3   | 7   | --     | --   |
|            | Ca(ICC2/P1489777)SNP_36871 | 1111 | G | C | 6   | 6   | --     | --   |
| CakTC41400 | Ca(ICC2/P1489777)SNP_36872 | 1898 | G | A | 7   | 3   | --     | --   |
| CakTC23649 | Ca(ICC2/P1489777)SNP_36873 | 1138 | C | A | 36  | 11  | --     | --   |
|            | Ca(ICC2/P1489777)SNP_36874 | 1413 | C | A | 76  | 11  | --     | --   |
|            | Ca(ICC2/P1489777)SNP_36875 | 2094 | G | A | 55  | 14  | --     | --   |
|            | Ca(ICC2/P1489777)SNP_36876 | 2291 | C | G | 45  | 15  | --     | --   |
|            | Ca(ICC2/P1489777)SNP_36877 | 2741 | T | C | 14  | 7   | --     | --   |
| CakTC28734 | Ca(ICC2/P1489777)SNP_36878 | 539  | A | G | 13  | 13  | Flower | bud  |
|            | Ca(ICC2/P1489777)SNP_36879 | 614  | G | A | 10  | 11  | Flower | bud  |
| CakTC30709 | Ca(ICC2/P1489777)SNP_36880 | 787  | G | A | 5   | 5   | --     | --   |
| CakTC34633 | Ca(ICC2/P1489777)SNP_36881 | 875  | G | A | 96  | 87  | Flower | bud  |
| CakTC31609 | Ca(ICC2/P1489777)SNP_36882 | 498  | C | T | 3   | 4   | --     | --   |
| CakTC25008 | Ca(ICC2/P1489777)SNP_36883 | 633  | C | T | 11  | 8   | --     | --   |
| CakTC30339 | Ca(ICC2/P1489777)SNP_36884 | 529  | T | A | 3   | 3   | --     | --   |
|            | Ca(ICC2/P1489777)SNP_36885 | 1775 | T | C | 7   | 9   | --     | --   |
|            | Ca(ICC2/P1489777)SNP_36886 | 2433 | A | G | 3   | 11  | --     | --   |
|            | Ca(ICC2/P1489777)SNP_36887 | 3035 | A | G | 7   | 4   | --     | --   |
|            | Ca(ICC2/P1489777)SNP_36888 | 3349 | C | T | 7   | 3   | --     | --   |
|            | Ca(ICC2/P1489777)SNP_36889 | 3458 | A | G | 8   | 5   | --     | --   |
| CakTC37776 | Ca(ICC2/P1489777)SNP_36890 | 127  | C | T | 59  | 20  | --     | --   |
|            | Ca(ICC2/P1489777)SNP_36891 | 188  | A | C | 61  | 28  | --     | --   |
|            | Ca(ICC2/P1489777)SNP_36892 | 245  | G | T | 77  | 29  | --     | --   |
|            | Ca(ICC2/P1489777)SNP_36893 | 331  | C | G | 88  | 26  | --     | --   |
|            | Ca(ICC2/P1489777)SNP_36894 | 841  | G | T | 30  | 9   | --     | --   |
| CakTC36621 | Ca(ICC2/P1489777)SNP_36895 | 190  | G | A | 6   | 13  | --     | --   |
|            | Ca(ICC2/P1489777)SNP_36896 | 432  | A | T | 3   | 3   | --     | --   |
| CakTC39986 | Ca(ICC2/P1489777)SNP_36897 | 181  | C | A | 10  | 6   | --     | --   |
|            | Ca(ICC2/P1489777)SNP_36898 | 190  | G | A | 8   | 6   | --     | --   |
|            | Ca(ICC2/P1489777)SNP_36899 | 233  | A | G | 10  | 5   | --     | --   |
|            | Ca(ICC2/P1489777)SNP_36900 | 464  | G | A | 14  | 6   | --     | --   |
|            | Ca(ICC2/P1489777)SNP_36901 | 896  | T | G | 9   | 8   | --     | --   |
|            | Ca(ICC2/P1489777)SNP_36902 | 990  | A | T | 6   | 5   | --     | --   |
| CakTC40071 | Ca(ICC2/P1489777)SNP_36903 | 1054 | A | G | 5   | 5   | --     | --   |
| CakTC35935 | Ca(ICC2/P1489777)SNP_36904 | 770  | C | A | 18  | 9   | --     | --   |
|            | Ca(ICC2/P1489777)SNP_36905 | 884  | G | C | 21  | 14  | --     | --   |
| CakTC22820 | Ca(ICC2/P1489777)SNP_36906 | 553  | T | C | 685 | 184 | --     | --   |
|            | Ca(ICC2/P1489777)SNP_36907 | 1764 | C | G | 153 | 61  | --     | --   |
|            | Ca(ICC2/P1489777)SNP_36908 | 1803 | T | G | 128 | 43  | --     | --   |
| CakTC31403 | Ca(ICC2/P1489777)SNP_36909 | 700  | T | G | 4   | 8   | --     | --   |
|            | Ca(ICC2/P1489777)SNP_36910 | 824  | A | G | 6   | 8   | --     | --   |
|            | Ca(ICC2/P1489777)SNP_36911 | 883  | T | C | 5   | 8   | --     | --   |
| CakTC13171 | Ca(ICC2/P1489777)SNP_36912 | 1102 | T | C | 386 | 75  | --     | --   |
|            | Ca(ICC2/P1489777)SNP_36913 | 1167 | T | A | 87  | 12  | --     | --   |
| CakTC27972 | Ca(ICC2/P1489777)SNP_36914 | 1224 | A | G | 9   | 12  | --     | --   |
| CakTC39706 | Ca(ICC2/P1489777)SNP_36915 | 228  | C | T | 16  | 15  | --     | --   |
| CakTC39346 | Ca(ICC2/P1489777)SNP_36916 | 931  | T | C | 5   | 3   | --     | --   |
| CakTC30097 | Ca(ICC2/P1489777)SNP_36917 | 556  | T | C | 3   | 5   | --     | GRAS |
| CakTC42914 | Ca(ICC2/P1489777)SNP_36918 | 203  | A | G | 44  | 17  | --     | --   |
|            | Ca(ICC2/P1489777)SNP_36919 | 518  | A | G | 29  | 24  | --     | --   |
|            | Ca(ICC2/P1489777)SNP_36920 | 637  | C | T | 33  | 24  | --     | --   |
|            | Ca(ICC2/P1489777)SNP_36921 | 952  | G | C | 54  | 28  | --     | --   |

|            |                             |      |   |   |     |    |    |     |
|------------|-----------------------------|------|---|---|-----|----|----|-----|
|            | Ca(ICCV2/PI489777)SNP_36922 | 1780 | A | G | 12  | 6  | -- | --  |
| CakTC17186 | Ca(ICCV2/PI489777)SNP_36923 | 625  | T | C | 16  | 13 | -- | --  |
|            | Ca(ICCV2/PI489777)SNP_36924 | 1456 | A | G | 34  | 23 | -- | --  |
|            | Ca(ICCV2/PI489777)SNP_36925 | 1869 | G | C | 50  | 25 | -- | --  |
|            | Ca(ICCV2/PI489777)SNP_36926 | 2508 | T | C | 40  | 16 | -- | --  |
|            | Ca(ICCV2/PI489777)SNP_36927 | 3339 | A | G | 12  | 7  | -- | --  |
| CakTC30063 | Ca(ICCV2/PI489777)SNP_36928 | 670  | T | C | 11  | 4  | -- | --  |
|            | Ca(ICCV2/PI489777)SNP_36929 | 733  | G | A | 15  | 10 | -- | --  |
|            | Ca(ICCV2/PI489777)SNP_36930 | 823  | G | A | 14  | 14 | -- | --  |
|            | Ca(ICCV2/PI489777)SNP_36931 | 1027 | A | G | 11  | 15 | -- | --  |
|            | Ca(ICCV2/PI489777)SNP_36932 | 1099 | A | T | 8   | 15 | -- | --  |
| CakTC36033 | Ca(ICCV2/PI489777)SNP_36933 | 300  | G | C | 11  | 12 | -- | --  |
|            | Ca(ICCV2/PI489777)SNP_36934 | 387  | A | G | 10  | 20 | -- | --  |
| CakTC38319 | Ca(ICCV2/PI489777)SNP_36935 | 44   | T | A | 10  | 6  | -- | --  |
|            | Ca(ICCV2/PI489777)SNP_36936 | 187  | G | A | 13  | 20 | -- | --  |
|            | Ca(ICCV2/PI489777)SNP_36937 | 878  | T | C | 4   | 13 | -- | --  |
| CakTC43122 | Ca(ICCV2/PI489777)SNP_36938 | 424  | G | A | 10  | 4  | -- | --  |
|            | Ca(ICCV2/PI489777)SNP_36939 | 445  | G | T | 9   | 4  | -- | --  |
|            | Ca(ICCV2/PI489777)SNP_36940 | 813  | C | T | 10  | 8  | -- | --  |
| CakTC36087 | Ca(ICCV2/PI489777)SNP_36941 | 1316 | T | A | 5   | 7  | -- | --  |
| CakTC32243 | Ca(ICCV2/PI489777)SNP_36942 | 101  | C | T | 5   | 3  | -- | --  |
|            | Ca(ICCV2/PI489777)SNP_36943 | 799  | C | T | 6   | 4  | -- | --  |
|            | Ca(ICCV2/PI489777)SNP_36944 | 1434 | T | C | 6   | 3  | -- | --  |
| CakTC24858 | Ca(ICCV2/PI489777)SNP_36945 | 1032 | G | A | 14  | 7  | -- | TUB |
|            | Ca(ICCV2/PI489777)SNP_36946 | 2019 | T | C | 16  | 7  | -- | TUB |
|            | Ca(ICCV2/PI489777)SNP_36947 | 2148 | G | T | 16  | 7  | -- | TUB |
|            | Ca(ICCV2/PI489777)SNP_36948 | 2337 | T | C | 16  | 4  | -- | TUB |
|            | Ca(ICCV2/PI489777)SNP_36949 | 3006 | T | C | 9   | 6  | -- | TUB |
|            | Ca(ICCV2/PI489777)SNP_36950 | 3090 | T | C | 12  | 6  | -- | TUB |
|            | Ca(ICCV2/PI489777)SNP_36951 | 3141 | G | A | 15  | 8  | -- | TUB |
|            | Ca(ICCV2/PI489777)SNP_36952 | 3312 | C | T | 15  | 8  | -- | TUB |
|            | Ca(ICCV2/PI489777)SNP_36953 | 3382 | C | G | 16  | 8  | -- | TUB |
| CakTC39665 | Ca(ICCV2/PI489777)SNP_36954 | 1151 | G | A | 10  | 6  | -- | --  |
|            | Ca(ICCV2/PI489777)SNP_36955 | 1490 | T | C | 18  | 13 | -- | --  |
| CakTC38828 | Ca(ICCV2/PI489777)SNP_36956 | 1121 | A | C | 19  | 9  | -- | --  |
| CakTC14847 | Ca(ICCV2/PI489777)SNP_36957 | 2505 | T | C | 3   | 4  | -- | --  |
| CakTC07599 | Ca(ICCV2/PI489777)SNP_36958 | 1824 | G | A | 4   | 5  | -- | --  |
|            | Ca(ICCV2/PI489777)SNP_36959 | 1899 | C | T | 4   | 4  | -- | --  |
|            | Ca(ICCV2/PI489777)SNP_36960 | 2067 | G | A | 9   | 4  | -- | --  |
|            | Ca(ICCV2/PI489777)SNP_36961 | 2619 | G | T | 4   | 4  | -- | --  |
| CakTC24033 | Ca(ICCV2/PI489777)SNP_36962 | 338  | A | G | 7   | 10 | -- | --  |
|            | Ca(ICCV2/PI489777)SNP_36963 | 627  | C | T | 9   | 8  | -- | --  |
|            | Ca(ICCV2/PI489777)SNP_36964 | 708  | C | T | 9   | 7  | -- | --  |
|            | Ca(ICCV2/PI489777)SNP_36965 | 903  | A | G | 8   | 9  | -- | --  |
|            | Ca(ICCV2/PI489777)SNP_36966 | 969  | G | A | 6   | 9  | -- | --  |
|            | Ca(ICCV2/PI489777)SNP_36967 | 1604 | G | A | 12  | 11 | -- | --  |
|            | Ca(ICCV2/PI489777)SNP_36968 | 1649 | G | T | 11  | 12 | -- | --  |
| CakTC40162 | Ca(ICCV2/PI489777)SNP_36969 | 1040 | G | A | 5   | 4  | -- | --  |
|            | Ca(ICCV2/PI489777)SNP_36970 | 1112 | G | A | 5   | 5  | -- | --  |
|            | Ca(ICCV2/PI489777)SNP_36971 | 1133 | A | G | 5   | 4  | -- | --  |
| CakTC32226 | Ca(ICCV2/PI489777)SNP_36972 | 238  | C | A | 8   | 4  | -- | --  |
|            | Ca(ICCV2/PI489777)SNP_36973 | 1291 | T | C | 6   | 9  | -- | --  |
|            | Ca(ICCV2/PI489777)SNP_36974 | 1867 | T | C | 10  | 7  | -- | --  |
| CakTC32631 | Ca(ICCV2/PI489777)SNP_36975 | 137  | T | A | 10  | 9  | -- | --  |
|            | Ca(ICCV2/PI489777)SNP_36976 | 219  | A | T | 3   | 5  | -- | --  |
|            | Ca(ICCV2/PI489777)SNP_36977 | 811  | T | G | 15  | 12 | -- | --  |
|            | Ca(ICCV2/PI489777)SNP_36978 | 1018 | G | A | 11  | 10 | -- | --  |
|            | Ca(ICCV2/PI489777)SNP_36979 | 1083 | A | G | 8   | 8  | -- | --  |
|            | Ca(ICCV2/PI489777)SNP_36980 | 1900 | G | A | 13  | 6  | -- | --  |
| CakTC27641 | Ca(ICCV2/PI489777)SNP_36981 | 138  | T | C | 9   | 17 | -- | --  |
|            | Ca(ICCV2/PI489777)SNP_36982 | 217  | T | C | 10  | 23 | -- | --  |
|            | Ca(ICCV2/PI489777)SNP_36983 | 234  | A | G | 10  | 23 | -- | --  |
|            | Ca(ICCV2/PI489777)SNP_36984 | 646  | G | A | 19  | 18 | -- | --  |
|            | Ca(ICCV2/PI489777)SNP_36985 | 870  | A | G | 13  | 13 | -- | --  |
|            | Ca(ICCV2/PI489777)SNP_36986 | 1059 | A | T | 7   | 8  | -- | --  |
| CakTC38923 | Ca(ICCV2/PI489777)SNP_36987 | 654  | T | A | 7   | 11 | -- | --  |
|            | Ca(ICCV2/PI489777)SNP_36988 | 772  | T | C | 8   | 8  | -- | --  |
| CakTC23739 | Ca(ICCV2/PI489777)SNP_36989 | 471  | T | C | 48  | 11 | -- | --  |
|            | Ca(ICCV2/PI489777)SNP_36990 | 770  | C | T | 112 | 40 | -- | --  |
|            | Ca(ICCV2/PI489777)SNP_36991 | 1934 | G | C | 81  | 22 | -- | --  |
| CakTC28132 | Ca(ICCV2/PI489777)SNP_36992 | 924  | A | T | 12  | 22 | -- | --  |
|            | Ca(ICCV2/PI489777)SNP_36993 | 927  | C | T | 16  | 21 | -- | --  |
| CakTC24431 | Ca(ICCV2/PI489777)SNP_36994 | 1267 | A | G | 32  | 11 | -- | --  |
|            | Ca(ICCV2/PI489777)SNP_36995 | 1474 | G | A | 37  | 10 | -- | --  |

|            |                            |      |   |   |    |    |           |    |
|------------|----------------------------|------|---|---|----|----|-----------|----|
|            | Ca(ICC2/PI489777)SNP_36996 | 1501 | T | C | 32 | 7  | --        | -- |
| CakTC36044 | Ca(ICC2/PI489777)SNP_36997 | 198  | A | G | 4  | 5  | --        | -- |
| CakTC40271 | Ca(ICC2/PI489777)SNP_36998 | 752  | A | G | 14 | 8  | --        | -- |
|            | Ca(ICC2/PI489777)SNP_36999 | 1913 | A | G | 17 | 7  | --        | -- |
|            | Ca(ICC2/PI489777)SNP_37000 | 1997 | C | T | 12 | 3  | --        | -- |
| CakTC16419 | Ca(ICC2/PI489777)SNP_37001 | 1110 | G | C | 7  | 4  | --        | -- |
|            | Ca(ICC2/PI489777)SNP_37002 | 1185 | T | A | 6  | 5  | --        | -- |
|            | Ca(ICC2/PI489777)SNP_37003 | 1260 | G | A | 6  | 4  | --        | -- |
|            | Ca(ICC2/PI489777)SNP_37004 | 1275 | T | C | 7  | 4  | --        | -- |
|            | Ca(ICC2/PI489777)SNP_37005 | 1410 | T | A | 4  | 4  | --        | -- |
| CakTC31748 | Ca(ICC2/PI489777)SNP_37006 | 289  | A | G | 4  | 3  | Root      | -- |
|            | Ca(ICC2/PI489777)SNP_37007 | 659  | C | T | 4  | 4  | Root      | -- |
|            | Ca(ICC2/PI489777)SNP_37008 | 680  | A | G | 4  | 3  | Root      | -- |
|            | Ca(ICC2/PI489777)SNP_37009 | 716  | C | T | 4  | 4  | Root      | -- |
| CakTC38628 | Ca(ICC2/PI489777)SNP_37010 | 1107 | A | G | 25 | 7  | --        | -- |
| CakTC38431 | Ca(ICC2/PI489777)SNP_37011 | 442  | C | T | 5  | 3  | --        | -- |
| CakTC34661 | Ca(ICC2/PI489777)SNP_37012 | 160  | C | G | 13 | 13 | --        | -- |
|            | Ca(ICC2/PI489777)SNP_37013 | 1383 | G | A | 15 | 7  | --        | -- |
|            | Ca(ICC2/PI489777)SNP_37014 | 1937 | C | T | 20 | 6  | --        | -- |
|            | Ca(ICC2/PI489777)SNP_37015 | 1983 | G | A | 11 | 5  | --        | -- |
|            | Ca(ICC2/PI489777)SNP_37016 | 2103 | G | C | 5  | 3  | --        | -- |
| CakTC30838 | Ca(ICC2/PI489777)SNP_37017 | 1125 | G | A | 3  | 3  | Shoot     | -- |
| CakTC32818 | Ca(ICC2/PI489777)SNP_37018 | 193  | G | A | 4  | 3  | --        | -- |
|            | Ca(ICC2/PI489777)SNP_37019 | 212  | C | T | 5  | 3  | --        | -- |
|            | Ca(ICC2/PI489777)SNP_37020 | 254  | T | C | 4  | 3  | --        | -- |
| CakTC28077 | Ca(ICC2/PI489777)SNP_37021 | 94   | T | A | 3  | 3  | --        | -- |
|            | Ca(ICC2/PI489777)SNP_37022 | 500  | C | T | 12 | 9  | --        | -- |
| CakTC33400 | Ca(ICC2/PI489777)SNP_37023 | 44   | G | A | 4  | 4  | --        | -- |
|            | Ca(ICC2/PI489777)SNP_37024 | 570  | T | C | 9  | 10 | --        | -- |
|            | Ca(ICC2/PI489777)SNP_37025 | 1164 | T | C | 12 | 9  | --        | -- |
|            | Ca(ICC2/PI489777)SNP_37026 | 2110 | C | G | 17 | 12 | --        | -- |
| CakTC43333 | Ca(ICC2/PI489777)SNP_37027 | 256  | A | T | 6  | 8  | --        | -- |
|            | Ca(ICC2/PI489777)SNP_37028 | 310  | G | C | 6  | 7  | --        | -- |
| CakTC30605 | Ca(ICC2/PI489777)SNP_37029 | 888  | C | T | 24 | 17 | --        | -- |
| CakTC25141 | Ca(ICC2/PI489777)SNP_37030 | 49   | T | A | 7  | 4  | --        | -- |
|            | Ca(ICC2/PI489777)SNP_37031 | 1380 | G | A | 29 | 7  | --        | -- |
| CakTC12092 | Ca(ICC2/PI489777)SNP_37032 | 2258 | A | G | 3  | 3  | --        | -- |
| CakTC09538 | Ca(ICC2/PI489777)SNP_37033 | 618  | A | T | 3  | 4  | --        | -- |
|            | Ca(ICC2/PI489777)SNP_37034 | 654  | T | C | 5  | 5  | --        | -- |
| CakTC39544 | Ca(ICC2/PI489777)SNP_37035 | 515  | A | G | 3  | 4  | --        | -- |
|            | Ca(ICC2/PI489777)SNP_37036 | 1162 | A | G | 10 | 4  | --        | -- |
| CakTC31720 | Ca(ICC2/PI489777)SNP_37037 | 191  | C | T | 12 | 5  | --        | -- |
|            | Ca(ICC2/PI489777)SNP_37038 | 332  | C | A | 9  | 5  | --        | -- |
|            | Ca(ICC2/PI489777)SNP_37039 | 417  | A | G | 8  | 4  | --        | -- |
| CakTC31005 | Ca(ICC2/PI489777)SNP_37040 | 1723 | A | C | 5  | 3  | --        | -- |
| CakTC33000 | Ca(ICC2/PI489777)SNP_37041 | 405  | G | A | 9  | 5  | --        | -- |
|            | Ca(ICC2/PI489777)SNP_37042 | 416  | A | C | 9  | 4  | --        | -- |
|            | Ca(ICC2/PI489777)SNP_37043 | 417  | A | C | 9  | 4  | --        | -- |
|            | Ca(ICC2/PI489777)SNP_37044 | 557  | G | A | 6  | 6  | --        | -- |
| CakTC31697 | Ca(ICC2/PI489777)SNP_37045 | 254  | A | T | 4  | 3  | Young_pod | -- |
|            | Ca(ICC2/PI489777)SNP_37046 | 398  | C | T | 7  | 3  | Young_pod | -- |
| CakTC08069 | Ca(ICC2/PI489777)SNP_37047 | 1868 | C | T | 4  | 3  | --        | -- |
| CakTC35998 | Ca(ICC2/PI489777)SNP_37048 | 748  | G | A | 13 | 4  | --        | -- |
|            | Ca(ICC2/PI489777)SNP_37049 | 751  | G | A | 13 | 4  | --        | -- |
|            | Ca(ICC2/PI489777)SNP_37050 | 1731 | C | G | 7  | 3  | --        | -- |
|            | Ca(ICC2/PI489777)SNP_37051 | 1977 | C | T | 17 | 5  | --        | -- |
|            | Ca(ICC2/PI489777)SNP_37052 | 2716 | T | C | 7  | 6  | --        | -- |
|            | Ca(ICC2/PI489777)SNP_37053 | 2750 | C | T | 6  | 6  | --        | -- |
| CakTC34049 | Ca(ICC2/PI489777)SNP_37054 | 189  | C | T | 12 | 10 | --        | -- |
| CakTC41958 | Ca(ICC2/PI489777)SNP_37055 | 351  | A | C | 10 | 4  | --        | -- |
|            | Ca(ICC2/PI489777)SNP_37056 | 723  | T | C | 8  | 4  | --        | -- |
|            | Ca(ICC2/PI489777)SNP_37057 | 759  | T | C | 6  | 3  | --        | -- |
| CakTC26382 | Ca(ICC2/PI489777)SNP_37058 | 1519 | G | A | 8  | 7  | --        | -- |
| CakTC11054 | Ca(ICC2/PI489777)SNP_37059 | 889  | G | A | 3  | 3  | --        | -- |
|            | Ca(ICC2/PI489777)SNP_37060 | 1573 | T | C | 8  | 4  | --        | -- |
|            | Ca(ICC2/PI489777)SNP_37061 | 1615 | A | T | 8  | 3  | --        | -- |
| CakTC10129 | Ca(ICC2/PI489777)SNP_37062 | 217  | A | G | 4  | 3  | --        | -- |
|            | Ca(ICC2/PI489777)SNP_37063 | 1765 | G | A | 3  | 3  | --        | -- |
| CakTC26583 | Ca(ICC2/PI489777)SNP_37064 | 679  | T | C | 10 | 9  | --        | -- |
|            | Ca(ICC2/PI489777)SNP_37065 | 1160 | T | A | 8  | 4  | --        | -- |
|            | Ca(ICC2/PI489777)SNP_37066 | 1310 | C | T | 14 | 5  | --        | -- |
|            | Ca(ICC2/PI489777)SNP_37067 | 1358 | G | T | 14 | 5  | --        | -- |
|            | Ca(ICC2/PI489777)SNP_37068 | 1365 | T | G | 15 | 5  | --        | -- |
|            | Ca(ICC2/PI489777)SNP_37069 | 1432 | T | A | 14 | 7  | --        | -- |

|            |                            |      |   |   |    |     |    |    |
|------------|----------------------------|------|---|---|----|-----|----|----|
|            | Ca(ICC2/PI489777)SNP_37070 | 1891 | G | C | 14 | 6   | -- | -- |
| CakTC23283 | Ca(ICC2/PI489777)SNP_37071 | 35   | C | T | 11 | 5   | -- | -- |
|            | Ca(ICC2/PI489777)SNP_37072 | 292  | G | A | 24 | 10  | -- | -- |
|            | Ca(ICC2/PI489777)SNP_37073 | 313  | A | C | 23 | 10  | -- | -- |
|            | Ca(ICC2/PI489777)SNP_37074 | 1348 | T | G | 4  | 4   | -- | -- |
| CakTC43040 | Ca(ICC2/PI489777)SNP_37075 | 95   | A | C | 21 | 7   | -- | -- |
| CakTC38306 | Ca(ICC2/PI489777)SNP_37076 | 794  | G | A | 23 | 8   | -- | -- |
|            | Ca(ICC2/PI489777)SNP_37077 | 1218 | C | T | 12 | 6   | -- | -- |
| CakTC25974 | Ca(ICC2/PI489777)SNP_37078 | 549  | C | T | 85 | 86  | -- | -- |
|            | Ca(ICC2/PI489777)SNP_37079 | 834  | A | G | 63 | 97  | -- | -- |
|            | Ca(ICC2/PI489777)SNP_37080 | 882  | A | G | 69 | 110 | -- | -- |
|            | Ca(ICC2/PI489777)SNP_37081 | 1221 | A | G | 78 | 120 | -- | -- |
|            | Ca(ICC2/PI489777)SNP_37082 | 1456 | G | A | 55 | 69  | -- | -- |
| CakTC26346 | Ca(ICC2/PI489777)SNP_37083 | 164  | C | T | 5  | 4   | -- | -- |
|            | Ca(ICC2/PI489777)SNP_37084 | 225  | T | C | 13 | 12  | -- | -- |
|            | Ca(ICC2/PI489777)SNP_37085 | 376  | T | A | 40 | 32  | -- | -- |
|            | Ca(ICC2/PI489777)SNP_37086 | 479  | T | C | 41 | 43  | -- | -- |
|            | Ca(ICC2/PI489777)SNP_37087 | 1337 | A | G | 34 | 11  | -- | -- |
|            | Ca(ICC2/PI489777)SNP_37088 | 1459 | T | C | 32 | 18  | -- | -- |
|            | Ca(ICC2/PI489777)SNP_37089 | 1488 | A | G | 31 | 20  | -- | -- |
|            | Ca(ICC2/PI489777)SNP_37090 | 1533 | A | G | 27 | 19  | -- | -- |
|            | Ca(ICC2/PI489777)SNP_37091 | 1657 | G | A | 22 | 18  | -- | -- |
|            | Ca(ICC2/PI489777)SNP_37092 | 2065 | T | C | 9  | 4   | -- | -- |
| CakTC41993 | Ca(ICC2/PI489777)SNP_37093 | 724  | G | C | 30 | 13  | -- | -- |
|            | Ca(ICC2/PI489777)SNP_37094 | 755  | G | T | 31 | 14  | -- | -- |
|            | Ca(ICC2/PI489777)SNP_37095 | 1663 | G | T | 6  | 3   | -- | -- |
| CakTC38283 | Ca(ICC2/PI489777)SNP_37096 | 579  | T | G | 10 | 3   | -- | HB |
|            | Ca(ICC2/PI489777)SNP_37097 | 835  | A | G | 13 | 3   | -- | HB |
| CakTC29597 | Ca(ICC2/PI489777)SNP_37098 | 41   | T | C | 6  | 5   | -- | -- |
|            | Ca(ICC2/PI489777)SNP_37099 | 76   | A | T | 7  | 6   | -- | -- |
|            | Ca(ICC2/PI489777)SNP_37100 | 89   | G | T | 7  | 6   | -- | -- |
|            | Ca(ICC2/PI489777)SNP_37101 | 301  | C | T | 14 | 6   | -- | -- |
|            | Ca(ICC2/PI489777)SNP_37102 | 346  | A | G | 13 | 12  | -- | -- |
|            | Ca(ICC2/PI489777)SNP_37103 | 394  | T | A | 12 | 10  | -- | -- |
|            | Ca(ICC2/PI489777)SNP_37104 | 520  | C | G | 7  | 4   | -- | -- |
|            | Ca(ICC2/PI489777)SNP_37105 | 606  | A | C | 3  | 3   | -- | -- |
|            | Ca(ICC2/PI489777)SNP_37106 | 608  | A | T | 3  | 3   | -- | -- |
| CakTC36674 | Ca(ICC2/PI489777)SNP_37107 | 1684 | T | G | 11 | 3   | -- | -- |
| CakTC25765 | Ca(ICC2/PI489777)SNP_37108 | 75   | G | A | 10 | 4   | -- | -- |
| CakTC33420 | Ca(ICC2/PI489777)SNP_37109 | 405  | T | G | 7  | 4   | -- | -- |
|            | Ca(ICC2/PI489777)SNP_37110 | 466  | T | C | 7  | 6   | -- | -- |
|            | Ca(ICC2/PI489777)SNP_37111 | 1292 | A | G | 7  | 8   | -- | -- |
|            | Ca(ICC2/PI489777)SNP_37112 | 1361 | C | A | 8  | 11  | -- | -- |
|            | Ca(ICC2/PI489777)SNP_37113 | 1473 | A | G | 8  | 10  | -- | -- |
|            | Ca(ICC2/PI489777)SNP_37114 | 3872 | T | C | 17 | 13  | -- | -- |
| CakTC30021 | Ca(ICC2/PI489777)SNP_37115 | 897  | G | A | 3  | 3   | -- | -- |
|            | Ca(ICC2/PI489777)SNP_37116 | 1036 | A | G | 4  | 4   | -- | -- |
|            | Ca(ICC2/PI489777)SNP_37117 | 1187 | T | C | 3  | 3   | -- | -- |
|            | Ca(ICC2/PI489777)SNP_37118 | 2434 | G | A | 5  | 9   | -- | -- |
| CakTC24275 | Ca(ICC2/PI489777)SNP_37119 | 229  | G | T | 5  | 5   | -- | -- |
|            | Ca(ICC2/PI489777)SNP_37120 | 262  | A | T | 5  | 5   | -- | -- |
| CakTC42997 | Ca(ICC2/PI489777)SNP_37121 | 1476 | T | C | 7  | 10  | -- | -- |
|            | Ca(ICC2/PI489777)SNP_37122 | 1714 | C | A | 11 | 9   | -- | -- |
|            | Ca(ICC2/PI489777)SNP_37123 | 1792 | C | T | 9  | 9   | -- | -- |
| CakTC09938 | Ca(ICC2/PI489777)SNP_37124 | 1152 | G | A | 4  | 4   | -- | -- |
|            | Ca(ICC2/PI489777)SNP_37125 | 1569 | G | A | 4  | 3   | -- | -- |
| CakTC10371 | Ca(ICC2/PI489777)SNP_37126 | 675  | G | A | 3  | 4   | -- | -- |
| CakTC39719 | Ca(ICC2/PI489777)SNP_37127 | 306  | T | C | 5  | 3   | -- | -- |
|            | Ca(ICC2/PI489777)SNP_37128 | 622  | T | C | 5  | 3   | -- | -- |
| CakTC28414 | Ca(ICC2/PI489777)SNP_37129 | 496  | G | A | 15 | 12  | -- | -- |
|            | Ca(ICC2/PI489777)SNP_37130 | 870  | G | A | 28 | 10  | -- | -- |
|            | Ca(ICC2/PI489777)SNP_37131 | 1068 | C | T | 19 | 6   | -- | -- |
| CakTC32576 | Ca(ICC2/PI489777)SNP_37132 | 309  | T | G | 7  | 9   | -- | -- |
|            | Ca(ICC2/PI489777)SNP_37133 | 361  | G | A | 7  | 9   | -- | -- |
|            | Ca(ICC2/PI489777)SNP_37134 | 1099 | C | T | 14 | 5   | -- | -- |
|            | Ca(ICC2/PI489777)SNP_37135 | 1186 | A | G | 10 | 5   | -- | -- |
|            | Ca(ICC2/PI489777)SNP_37136 | 2065 | C | A | 3  | 7   | -- | -- |
|            | Ca(ICC2/PI489777)SNP_37137 | 2081 | C | A | 4  | 7   | -- | -- |
|            | Ca(ICC2/PI489777)SNP_37138 | 2137 | C | T | 4  | 5   | -- | -- |
|            | Ca(ICC2/PI489777)SNP_37139 | 2144 | A | T | 3  | 6   | -- | -- |
| CakTC29063 | Ca(ICC2/PI489777)SNP_37140 | 682  | G | A | 11 | 7   | -- | -- |
|            | Ca(ICC2/PI489777)SNP_37141 | 693  | T | G | 10 | 6   | -- | -- |
|            | Ca(ICC2/PI489777)SNP_37142 | 758  | G | A | 5  | 6   | -- | -- |
|            | Ca(ICC2/PI489777)SNP_37143 | 779  | A | G | 6  | 8   | -- | -- |

|            |                            |      |   |   |    |    |           |            |
|------------|----------------------------|------|---|---|----|----|-----------|------------|
|            | Ca(ICC2/PI489777)SNP_37144 | 848  | A | G | 5  | 9  | --        | --         |
|            | Ca(ICC2/PI489777)SNP_37145 | 867  | G | A | 5  | 11 | --        | --         |
|            | Ca(ICC2/PI489777)SNP_37146 | 885  | A | G | 5  | 11 | --        | --         |
| CakTC42337 | Ca(ICC2/PI489777)SNP_37147 | 855  | A | G | 4  | 3  | --        | --         |
|            | Ca(ICC2/PI489777)SNP_37148 | 1264 | T | C | 6  | 8  | --        | --         |
|            | Ca(ICC2/PI489777)SNP_37149 | 1700 | T | C | 5  | 4  | --        | --         |
| CakTC31002 | Ca(ICC2/PI489777)SNP_37150 | 780  | C | T | 7  | 4  | Root      | --         |
| CakTC28975 | Ca(ICC2/PI489777)SNP_37151 | 780  | G | A | 4  | 3  | --        | --         |
|            | Ca(ICC2/PI489777)SNP_37152 | 878  | G | C | 4  | 3  | --        | --         |
|            | Ca(ICC2/PI489777)SNP_37153 | 889  | A | G | 5  | 3  | --        | --         |
| CakTC10636 | Ca(ICC2/PI489777)SNP_37154 | 176  | T | G | 46 | 12 | --        | --         |
|            | Ca(ICC2/PI489777)SNP_37155 | 211  | T | C | 70 | 20 | --        | --         |
| CakTC26774 | Ca(ICC2/PI489777)SNP_37156 | 429  | A | C | 5  | 6  | --        | --         |
|            | Ca(ICC2/PI489777)SNP_37157 | 440  | T | C | 5  | 6  | --        | --         |
| CakTC32957 | Ca(ICC2/PI489777)SNP_37158 | 1655 | G | C | 4  | 3  | --        | --         |
|            | Ca(ICC2/PI489777)SNP_37159 | 2189 | T | C | 5  | 6  | --        | --         |
|            | Ca(ICC2/PI489777)SNP_37160 | 2279 | G | A | 5  | 4  | --        | --         |
|            | Ca(ICC2/PI489777)SNP_37161 | 2333 | T | G | 4  | 5  | --        | --         |
|            | Ca(ICC2/PI489777)SNP_37162 | 2423 | A | G | 4  | 5  | --        | --         |
| CakTC40253 | Ca(ICC2/PI489777)SNP_37163 | 972  | C | T | 27 | 5  | --        | bZIP       |
| CakTC06982 | Ca(ICC2/PI489777)SNP_37164 | 227  | A | G | 3  | 3  | --        | --         |
|            | Ca(ICC2/PI489777)SNP_37165 | 338  | G | A | 3  | 3  | --        | --         |
|            | Ca(ICC2/PI489777)SNP_37166 | 1586 | G | T | 5  | 5  | --        | --         |
|            | Ca(ICC2/PI489777)SNP_37167 | 1670 | A | G | 4  | 5  | --        | --         |
|            | Ca(ICC2/PI489777)SNP_37168 | 1931 | G | A | 8  | 4  | --        | --         |
|            | Ca(ICC2/PI489777)SNP_37169 | 1994 | A | G | 4  | 5  | --        | --         |
|            | Ca(ICC2/PI489777)SNP_37170 | 3675 | T | G | 9  | 7  | --        | --         |
|            | Ca(ICC2/PI489777)SNP_37171 | 4121 | C | G | 21 | 4  | --        | --         |
|            | Ca(ICC2/PI489777)SNP_37172 | 4751 | G | A | 7  | 3  | --        | --         |
| CakTC38963 | Ca(ICC2/PI489777)SNP_37173 | 210  | C | T | 4  | 4  | --        | --         |
|            | Ca(ICC2/PI489777)SNP_37174 | 358  | A | G | 4  | 3  | --        | --         |
| CakTC42740 | Ca(ICC2/PI489777)SNP_37175 | 557  | T | C | 8  | 7  | --        | --         |
| CakTC25651 | Ca(ICC2/PI489777)SNP_37176 | 451  | A | G | 54 | 22 | --        | NAC        |
|            | Ca(ICC2/PI489777)SNP_37177 | 1141 | G | C | 45 | 21 | --        | NAC        |
|            | Ca(ICC2/PI489777)SNP_37178 | 1148 | G | A | 45 | 19 | --        | NAC        |
|            | Ca(ICC2/PI489777)SNP_37179 | 1182 | G | A | 27 | 17 | --        | NAC        |
| CakTC38224 | Ca(ICC2/PI489777)SNP_37180 | 862  | A | G | 57 | 32 | --        | --         |
| CakTC04020 | Ca(ICC2/PI489777)SNP_37181 | 262  | T | C | 7  | 11 | --        | --         |
|            | Ca(ICC2/PI489777)SNP_37182 | 692  | G | T | 7  | 5  | --        | --         |
|            | Ca(ICC2/PI489777)SNP_37183 | 1274 | C | T | 17 | 11 | --        | --         |
|            | Ca(ICC2/PI489777)SNP_37184 | 1364 | C | A | 13 | 11 | --        | --         |
|            | Ca(ICC2/PI489777)SNP_37185 | 1391 | T | G | 10 | 10 | --        | --         |
|            | Ca(ICC2/PI489777)SNP_37186 | 1631 | A | T | 15 | 9  | --        | --         |
|            | Ca(ICC2/PI489777)SNP_37187 | 1712 | T | C | 14 | 10 | --        | --         |
|            | Ca(ICC2/PI489777)SNP_37188 | 1724 | G | A | 14 | 10 | --        | --         |
|            | Ca(ICC2/PI489777)SNP_37189 | 1730 | T | C | 15 | 10 | --        | --         |
|            | Ca(ICC2/PI489777)SNP_37190 | 1772 | A | G | 13 | 8  | --        | --         |
|            | Ca(ICC2/PI489777)SNP_37191 | 1890 | A | C | 9  | 7  | --        | --         |
| CakTC10197 | Ca(ICC2/PI489777)SNP_37192 | 1112 | C | T | 6  | 3  | --        | --         |
|            | Ca(ICC2/PI489777)SNP_37193 | 1526 | T | C | 9  | 9  | --        | --         |
| CakTC18790 | Ca(ICC2/PI489777)SNP_37194 | 114  | T | C | 4  | 4  | --        | --         |
|            | Ca(ICC2/PI489777)SNP_37195 | 236  | T | C | 4  | 5  | --        | --         |
| CakTC39912 | Ca(ICC2/PI489777)SNP_37196 | 216  | T | G | 6  | 7  | --        | --         |
| CakTC25676 | Ca(ICC2/PI489777)SNP_37197 | 310  | C | T | 25 | 14 | --        | --         |
|            | Ca(ICC2/PI489777)SNP_37198 | 468  | A | G | 41 | 17 | --        | --         |
|            | Ca(ICC2/PI489777)SNP_37199 | 819  | T | C | 32 | 14 | --        | --         |
|            | Ca(ICC2/PI489777)SNP_37200 | 903  | A | G | 40 | 15 | --        | --         |
|            | Ca(ICC2/PI489777)SNP_37201 | 1502 | G | A | 19 | 10 | --        | --         |
| CakTC27579 | Ca(ICC2/PI489777)SNP_37202 | 817  | A | G | 32 | 20 | --        | --         |
|            | Ca(ICC2/PI489777)SNP_37203 | 1059 | C | T | 44 | 23 | --        | --         |
|            | Ca(ICC2/PI489777)SNP_37204 | 2169 | G | T | 21 | 12 | --        | --         |
|            | Ca(ICC2/PI489777)SNP_37205 | 2215 | A | G | 20 | 15 | --        | --         |
|            | Ca(ICC2/PI489777)SNP_37206 | 2638 | G | A | 16 | 6  | --        | --         |
| CakTC31552 | Ca(ICC2/PI489777)SNP_37207 | 754  | T | C | 4  | 3  | --        | Alfin-like |
| CakTC31127 | Ca(ICC2/PI489777)SNP_37208 | 297  | G | C | 9  | 41 | --        | --         |
|            | Ca(ICC2/PI489777)SNP_37209 | 549  | C | T | 7  | 40 | --        | --         |
|            | Ca(ICC2/PI489777)SNP_37210 | 599  | G | A | 5  | 33 | --        | --         |
| CakTC39832 | Ca(ICC2/PI489777)SNP_37211 | 288  | T | C | 5  | 6  | --        | --         |
|            | Ca(ICC2/PI489777)SNP_37212 | 333  | A | G | 5  | 6  | --        | --         |
|            | Ca(ICC2/PI489777)SNP_37213 | 658  | G | A | 6  | 7  | --        | --         |
|            | Ca(ICC2/PI489777)SNP_37214 | 681  | G | A | 6  | 7  | --        | --         |
|            | Ca(ICC2/PI489777)SNP_37215 | 1167 | C | T | 8  | 11 | --        | --         |
|            | Ca(ICC2/PI489777)SNP_37216 | 1429 | A | C | 6  | 3  | --        | --         |
| CakTC40694 | Ca(ICC2/PI489777)SNP_37217 | 630  | G | A | 11 | 15 | Young_pod | --         |

|            |                            |      |   |   |    |    |           |      |
|------------|----------------------------|------|---|---|----|----|-----------|------|
|            | Ca(ICC2/PI489777)SNP_37218 | 693  | C | A | 14 | 19 | Young_pod | --   |
|            | Ca(ICC2/PI489777)SNP_37219 | 1356 | C | T | 9  | 3  | Young_pod | --   |
|            | Ca(ICC2/PI489777)SNP_37220 | 2092 | A | G | 7  | 3  | Young_pod | --   |
| CakTC42032 | Ca(ICC2/PI489777)SNP_37221 | 741  | A | G | 49 | 25 | --        | --   |
|            | Ca(ICC2/PI489777)SNP_37222 | 758  | C | G | 52 | 25 | --        | --   |
|            | Ca(ICC2/PI489777)SNP_37223 | 1602 | T | G | 64 | 37 | --        | --   |
| CakTC33892 | Ca(ICC2/PI489777)SNP_37224 | 1829 | T | C | 3  | 4  | --        | --   |
| CakTC39004 | Ca(ICC2/PI489777)SNP_37225 | 924  | T | C | 42 | 44 | --        | --   |
|            | Ca(ICC2/PI489777)SNP_37226 | 1253 | G | A | 24 | 22 | --        | --   |
| CakTC36164 | Ca(ICC2/PI489777)SNP_37227 | 197  | A | G | 3  | 4  | --        | --   |
|            | Ca(ICC2/PI489777)SNP_37228 | 237  | C | T | 4  | 4  | --        | --   |
|            | Ca(ICC2/PI489777)SNP_37229 | 240  | C | T | 4  | 4  | --        | --   |
|            | Ca(ICC2/PI489777)SNP_37230 | 504  | G | C | 4  | 5  | --        | --   |
| CakTC32169 | Ca(ICC2/PI489777)SNP_37231 | 421  | T | C | 4  | 6  | --        | --   |
|            | Ca(ICC2/PI489777)SNP_37232 | 532  | C | T | 3  | 5  | --        | --   |
| CakTC24801 | Ca(ICC2/PI489777)SNP_37233 | 1237 | A | G | 4  | 7  | --        | --   |
| CakTC43019 | Ca(ICC2/PI489777)SNP_37234 | 361  | C | G | 9  | 3  | Young_pod | --   |
| CakTC11383 | Ca(ICC2/PI489777)SNP_37235 | 426  | C | T | 32 | 22 | --        | --   |
|            | Ca(ICC2/PI489777)SNP_37236 | 504  | G | A | 23 | 18 | --        | --   |
|            | Ca(ICC2/PI489777)SNP_37237 | 594  | C | T | 23 | 17 | --        | --   |
|            | Ca(ICC2/PI489777)SNP_37238 | 1179 | A | T | 15 | 8  | --        | --   |
| CakTC40380 | Ca(ICC2/PI489777)SNP_37239 | 797  | G | A | 46 | 46 | Flower    | bud  |
| CakTC43334 | Ca(ICC2/PI489777)SNP_37240 | 1614 | G | A | 10 | 3  | --        | --   |
| CakTC35118 | Ca(ICC2/PI489777)SNP_37241 | 895  | T | C | 15 | 6  | --        | GRAS |
|            | Ca(ICC2/PI489777)SNP_37242 | 900  | A | C | 14 | 5  | --        | GRAS |
|            | Ca(ICC2/PI489777)SNP_37243 | 1357 | G | A | 13 | 10 | --        | GRAS |
|            | Ca(ICC2/PI489777)SNP_37244 | 1486 | T | C | 11 | 5  | --        | GRAS |
|            | Ca(ICC2/PI489777)SNP_37245 | 1897 | G | A | 13 | 10 | --        | GRAS |
|            | Ca(ICC2/PI489777)SNP_37246 | 2227 | C | T | 19 | 3  | --        | GRAS |
| CakTC24414 | Ca(ICC2/PI489777)SNP_37247 | 1152 | T | G | 38 | 28 | --        | --   |
| CakTC39204 | Ca(ICC2/PI489777)SNP_37248 | 670  | A | G | 20 | 6  | --        | --   |
|            | Ca(ICC2/PI489777)SNP_37249 | 853  | G | A | 15 | 6  | --        | --   |
|            | Ca(ICC2/PI489777)SNP_37250 | 976  | G | T | 8  | 8  | --        | --   |
| CakTC25514 | Ca(ICC2/PI489777)SNP_37251 | 334  | A | C | 4  | 10 | --        | --   |
|            | Ca(ICC2/PI489777)SNP_37252 | 431  | C | G | 3  | 8  | --        | --   |
| CakTC09781 | Ca(ICC2/PI489777)SNP_37253 | 1793 | A | G | 3  | 3  | --        | --   |
|            | Ca(ICC2/PI489777)SNP_37254 | 3290 | T | A | 3  | 5  | --        | --   |
| CakTC39486 | Ca(ICC2/PI489777)SNP_37255 | 666  | A | C | 6  | 13 | --        | --   |
|            | Ca(ICC2/PI489777)SNP_37256 | 669  | C | T | 6  | 13 | --        | --   |
|            | Ca(ICC2/PI489777)SNP_37257 | 726  | G | A | 7  | 14 | --        | --   |
| CakTC43282 | Ca(ICC2/PI489777)SNP_37258 | 878  | G | T | 36 | 16 | --        | --   |
| CakTC37578 | Ca(ICC2/PI489777)SNP_37259 | 140  | G | T | 38 | 3  | --        | --   |
|            | Ca(ICC2/PI489777)SNP_37260 | 632  | C | T | 14 | 13 | --        | --   |
| CakTC39923 | Ca(ICC2/PI489777)SNP_37261 | 411  | A | G | 18 | 8  | --        | --   |
|            | Ca(ICC2/PI489777)SNP_37262 | 559  | C | T | 20 | 8  | --        | --   |
|            | Ca(ICC2/PI489777)SNP_37263 | 1000 | T | C | 14 | 10 | --        | --   |
|            | Ca(ICC2/PI489777)SNP_37264 | 1077 | T | C | 12 | 5  | --        | --   |
|            | Ca(ICC2/PI489777)SNP_37265 | 1158 | T | C | 10 | 3  | --        | --   |
|            | Ca(ICC2/PI489777)SNP_37266 | 1163 | A | T | 10 | 3  | --        | --   |
| CakTC29397 | Ca(ICC2/PI489777)SNP_37267 | 519  | T | C | 4  | 3  | Flower    | bud  |
| CakTC31600 | Ca(ICC2/PI489777)SNP_37268 | 420  | G | A | 3  | 4  | --        | --   |
|            | Ca(ICC2/PI489777)SNP_37269 | 2179 | A | G | 16 | 4  | --        | --   |
|            | Ca(ICC2/PI489777)SNP_37270 | 2311 | T | A | 13 | 6  | --        | --   |
|            | Ca(ICC2/PI489777)SNP_37271 | 2359 | T | C | 11 | 4  | --        | --   |
| CakTC37668 | Ca(ICC2/PI489777)SNP_37272 | 424  | A | C | 35 | 21 | --        | --   |
|            | Ca(ICC2/PI489777)SNP_37273 | 530  | A | G | 35 | 13 | --        | --   |
|            | Ca(ICC2/PI489777)SNP_37274 | 1023 | G | T | 19 | 7  | --        | --   |
|            | Ca(ICC2/PI489777)SNP_37275 | 1123 | C | A | 11 | 7  | --        | --   |
| CakTC39340 | Ca(ICC2/PI489777)SNP_37276 | 179  | G | A | 6  | 6  | --        | --   |
|            | Ca(ICC2/PI489777)SNP_37277 | 401  | G | C | 24 | 12 | --        | --   |
|            | Ca(ICC2/PI489777)SNP_37278 | 824  | A | G | 38 | 13 | --        | --   |
|            | Ca(ICC2/PI489777)SNP_37279 | 1006 | T | C | 29 | 12 | --        | --   |
| CakTC41437 | Ca(ICC2/PI489777)SNP_37280 | 1683 | G | T | 33 | 4  | --        | --   |
| CakTC36836 | Ca(ICC2/PI489777)SNP_37281 | 1592 | T | C | 3  | 3  | Young_pod | --   |
|            | Ca(ICC2/PI489777)SNP_37282 | 1719 | T | C | 5  | 5  | Young_pod | --   |
|            | Ca(ICC2/PI489777)SNP_37283 | 1745 | T | G | 5  | 7  | Young_pod | --   |
|            | Ca(ICC2/PI489777)SNP_37284 | 1891 | G | C | 6  | 6  | Young_pod | --   |
|            | Ca(ICC2/PI489777)SNP_37285 | 1938 | A | G | 7  | 5  | Young_pod | --   |
|            | Ca(ICC2/PI489777)SNP_37286 | 1962 | T | C | 7  | 4  | Young_pod | --   |
| CakTC29569 | Ca(ICC2/PI489777)SNP_37287 | 780  | C | A | 5  | 13 | --        | --   |
|            | Ca(ICC2/PI489777)SNP_37288 | 786  | A | G | 5  | 13 | --        | --   |
|            | Ca(ICC2/PI489777)SNP_37289 | 855  | A | G | 5  | 10 | --        | --   |
| CakTC41310 | Ca(ICC2/PI489777)SNP_37290 | 142  | G | T | 11 | 15 | --        | --   |
| CakTC38577 | Ca(ICC2/PI489777)SNP_37291 | 94   | T | G | 12 | 6  | --        | --   |



|            |                            |      |   |   |    |    |    |      |
|------------|----------------------------|------|---|---|----|----|----|------|
|            | Ca(ICC2/PI489777)SNP_37292 | 235  | C | T | 13 | 6  | -- | --   |
|            | Ca(ICC2/PI489777)SNP_37293 | 1413 | C | T | 19 | 21 | -- | --   |
|            | Ca(ICC2/PI489777)SNP_37294 | 1426 | C | T | 19 | 20 | -- | --   |
|            | Ca(ICC2/PI489777)SNP_37295 | 1453 | G | T | 17 | 20 | -- | --   |
|            | Ca(ICC2/PI489777)SNP_37296 | 1456 | G | A | 18 | 17 | -- | --   |
|            | Ca(ICC2/PI489777)SNP_37297 | 1669 | A | C | 9  | 13 | -- | --   |
|            | Ca(ICC2/PI489777)SNP_37298 | 1718 | T | C | 5  | 11 | -- | --   |
|            | Ca(ICC2/PI489777)SNP_37299 | 1722 | A | C | 5  | 11 | -- | --   |
| CakTC05914 | Ca(ICC2/PI489777)SNP_37300 | 96   | G | C | 4  | 8  | -- | --   |
|            | Ca(ICC2/PI489777)SNP_37301 | 340  | A | G | 6  | 22 | -- | --   |
|            | Ca(ICC2/PI489777)SNP_37302 | 381  | T | A | 6  | 21 | -- | --   |
|            | Ca(ICC2/PI489777)SNP_37303 | 398  | T | C | 6  | 24 | -- | --   |
|            | Ca(ICC2/PI489777)SNP_37304 | 408  | T | A | 7  | 23 | -- | --   |
|            | Ca(ICC2/PI489777)SNP_37305 | 1086 | G | T | 3  | 7  | -- | --   |
| CakTC41194 | Ca(ICC2/PI489777)SNP_37306 | 372  | A | G | 18 | 15 | -- | --   |
|            | Ca(ICC2/PI489777)SNP_37307 | 531  | C | A | 12 | 16 | -- | --   |
|            | Ca(ICC2/PI489777)SNP_37308 | 690  | G | A | 11 | 8  | -- | --   |
|            | Ca(ICC2/PI489777)SNP_37309 | 870  | T | G | 9  | 17 | -- | --   |
|            | Ca(ICC2/PI489777)SNP_37310 | 879  | G | A | 10 | 17 | -- | --   |
|            | Ca(ICC2/PI489777)SNP_37311 | 1001 | C | G | 8  | 18 | -- | --   |
|            | Ca(ICC2/PI489777)SNP_37312 | 1404 | T | G | 17 | 13 | -- | --   |
|            | Ca(ICC2/PI489777)SNP_37313 | 1713 | C | G | 23 | 24 | -- | --   |
| CakTC23866 | Ca(ICC2/PI489777)SNP_37314 | 645  | G | A | 67 | 34 | -- | --   |
|            | Ca(ICC2/PI489777)SNP_37315 | 1311 | A | G | 57 | 21 | -- | --   |
|            | Ca(ICC2/PI489777)SNP_37316 | 1968 | C | G | 3  | 4  | -- | --   |
| CakTC30040 | Ca(ICC2/PI489777)SNP_37317 | 795  | G | T | 3  | 8  | -- | --   |
|            | Ca(ICC2/PI489777)SNP_37318 | 804  | A | G | 4  | 9  | -- | --   |
|            | Ca(ICC2/PI489777)SNP_37319 | 836  | T | C | 4  | 8  | -- | --   |
|            | Ca(ICC2/PI489777)SNP_37320 | 940  | T | C | 5  | 11 | -- | --   |
|            | Ca(ICC2/PI489777)SNP_37321 | 1005 | G | A | 6  | 10 | -- | --   |
|            | Ca(ICC2/PI489777)SNP_37322 | 1175 | T | A | 3  | 7  | -- | --   |
| CakTC35651 | Ca(ICC2/PI489777)SNP_37323 | 128  | C | T | 3  | 3  | -- | --   |
|            | Ca(ICC2/PI489777)SNP_37324 | 2294 | A | G | 6  | 7  | -- | --   |
| CakTC27703 | Ca(ICC2/PI489777)SNP_37325 | 138  | C | T | 9  | 3  | -- | --   |
|            | Ca(ICC2/PI489777)SNP_37326 | 139  | A | G | 9  | 3  | -- | --   |
|            | Ca(ICC2/PI489777)SNP_37327 | 380  | T | A | 20 | 7  | -- | --   |
|            | Ca(ICC2/PI489777)SNP_37328 | 397  | C | A | 20 | 8  | -- | --   |
|            | Ca(ICC2/PI489777)SNP_37329 | 802  | C | T | 42 | 8  | -- | --   |
| CakTC32002 | Ca(ICC2/PI489777)SNP_37330 | 4641 | T | C | 8  | 3  | -- | SNF2 |
|            | Ca(ICC2/PI489777)SNP_37331 | 5963 | G | A | 4  | 8  | -- | SNF2 |
|            | Ca(ICC2/PI489777)SNP_37332 | 6114 | C | T | 6  | 12 | -- | SNF2 |
|            | Ca(ICC2/PI489777)SNP_37333 | 6337 | T | C | 6  | 13 | -- | SNF2 |
| CakTC28699 | Ca(ICC2/PI489777)SNP_37334 | 384  | T | A | 7  | 17 | -- | --   |
|            | Ca(ICC2/PI489777)SNP_37335 | 399  | C | T | 7  | 14 | -- | --   |
|            | Ca(ICC2/PI489777)SNP_37336 | 535  | A | G | 3  | 11 | -- | --   |
|            | Ca(ICC2/PI489777)SNP_37337 | 639  | T | C | 9  | 10 | -- | --   |
| CakTC40510 | Ca(ICC2/PI489777)SNP_37338 | 1312 | T | C | 41 | 46 | -- | --   |
|            | Ca(ICC2/PI489777)SNP_37339 | 2153 | G | A | 20 | 26 | -- | --   |
| CakTC39957 | Ca(ICC2/PI489777)SNP_37340 | 72   | A | G | 3  | 6  | -- | --   |
|            | Ca(ICC2/PI489777)SNP_37341 | 83   | A | G | 4  | 6  | -- | --   |
|            | Ca(ICC2/PI489777)SNP_37342 | 663  | C | T | 13 | 4  | -- | --   |
|            | Ca(ICC2/PI489777)SNP_37343 | 701  | T | C | 15 | 4  | -- | --   |
|            | Ca(ICC2/PI489777)SNP_37344 | 1336 | G | A | 3  | 3  | -- | --   |
| CakTC32090 | Ca(ICC2/PI489777)SNP_37345 | 844  | G | A | 24 | 6  | -- | --   |
|            | Ca(ICC2/PI489777)SNP_37346 | 1078 | G | A | 5  | 4  | -- | --   |
|            | Ca(ICC2/PI489777)SNP_37347 | 1852 | A | G | 9  | 3  | -- | --   |
|            | Ca(ICC2/PI489777)SNP_37348 | 2413 | C | T | 10 | 7  | -- | --   |
|            | Ca(ICC2/PI489777)SNP_37349 | 3520 | A | C | 6  | 3  | -- | --   |
| CakTC40362 | Ca(ICC2/PI489777)SNP_37350 | 593  | G | A | 5  | 7  | -- | --   |
|            | Ca(ICC2/PI489777)SNP_37351 | 647  | T | C | 5  | 7  | -- | --   |
| CakTC11584 | Ca(ICC2/PI489777)SNP_37352 | 67   | C | G | 4  | 3  | -- | --   |
|            | Ca(ICC2/PI489777)SNP_37353 | 913  | G | A | 15 | 11 | -- | --   |
| CakTC26725 | Ca(ICC2/PI489777)SNP_37354 | 78   | T | C | 18 | 13 | -- | --   |
|            | Ca(ICC2/PI489777)SNP_37355 | 200  | C | T | 28 | 9  | -- | --   |
|            | Ca(ICC2/PI489777)SNP_37356 | 203  | A | C | 22 | 9  | -- | --   |
| CakTC27385 | Ca(ICC2/PI489777)SNP_37357 | 470  | G | A | 10 | 5  | -- | --   |
|            | Ca(ICC2/PI489777)SNP_37358 | 989  | G | C | 14 | 8  | -- | --   |
| CakTC33352 | Ca(ICC2/PI489777)SNP_37359 | 501  | A | G | 10 | 17 | -- | --   |
|            | Ca(ICC2/PI489777)SNP_37360 | 1027 | G | T | 19 | 9  | -- | --   |
|            | Ca(ICC2/PI489777)SNP_37361 | 1048 | A | T | 21 | 6  | -- | --   |
|            | Ca(ICC2/PI489777)SNP_37362 | 1049 | C | G | 21 | 6  | -- | --   |
|            | Ca(ICC2/PI489777)SNP_37363 | 1170 | A | G | 17 | 8  | -- | --   |
|            | Ca(ICC2/PI489777)SNP_37364 | 1263 | G | A | 17 | 12 | -- | --   |
|            | Ca(ICC2/PI489777)SNP_37365 | 1272 | G | A | 16 | 10 | -- | --   |

|            |                            |      |   |   |     |    |    |     |
|------------|----------------------------|------|---|---|-----|----|----|-----|
|            | Ca(ICC2/PI489777)SNP_37366 | 1431 | G | A | 20  | 14 | -- | --  |
|            | Ca(ICC2/PI489777)SNP_37367 | 1437 | G | A | 20  | 12 | -- | --  |
|            | Ca(ICC2/PI489777)SNP_37368 | 1542 | T | C | 12  | 10 | -- | --  |
|            | Ca(ICC2/PI489777)SNP_37369 | 1969 | A | T | 12  | 10 | -- | --  |
| CakTC31136 | Ca(ICC2/PI489777)SNP_37370 | 693  | T | A | 4   | 3  | -- | --  |
| CakTC33046 | Ca(ICC2/PI489777)SNP_37371 | 45   | C | G | 4   | 4  | -- | --  |
|            | Ca(ICC2/PI489777)SNP_37372 | 531  | A | G | 18  | 14 | -- | --  |
|            | Ca(ICC2/PI489777)SNP_37373 | 532  | A | G | 18  | 14 | -- | --  |
|            | Ca(ICC2/PI489777)SNP_37374 | 572  | C | T | 22  | 20 | -- | --  |
|            | Ca(ICC2/PI489777)SNP_37375 | 665  | T | C | 22  | 21 | -- | --  |
|            | Ca(ICC2/PI489777)SNP_37376 | 725  | C | G | 18  | 20 | -- | --  |
|            | Ca(ICC2/PI489777)SNP_37377 | 1030 | T | C | 16  | 9  | -- | --  |
|            | Ca(ICC2/PI489777)SNP_37378 | 1115 | G | A | 24  | 13 | -- | --  |
|            | Ca(ICC2/PI489777)SNP_37379 | 2747 | T | C | 24  | 9  | -- | --  |
|            | Ca(ICC2/PI489777)SNP_37380 | 3443 | T | C | 30  | 10 | -- | --  |
| CakTC34977 | Ca(ICC2/PI489777)SNP_37381 | 560  | C | T | 10  | 19 | -- | --  |
|            | Ca(ICC2/PI489777)SNP_37382 | 687  | A | C | 14  | 11 | -- | --  |
|            | Ca(ICC2/PI489777)SNP_37383 | 729  | T | C | 17  | 10 | -- | --  |
|            | Ca(ICC2/PI489777)SNP_37384 | 765  | G | T | 18  | 10 | -- | --  |
|            | Ca(ICC2/PI489777)SNP_37385 | 819  | C | G | 15  | 13 | -- | --  |
|            | Ca(ICC2/PI489777)SNP_37386 | 861  | G | A | 12  | 10 | -- | --  |
|            | Ca(ICC2/PI489777)SNP_37387 | 978  | T | G | 9   | 19 | -- | --  |
| CakTC39321 | Ca(ICC2/PI489777)SNP_37388 | 459  | C | T | 5   | 5  | -- | --  |
|            | Ca(ICC2/PI489777)SNP_37389 | 658  | A | G | 4   | 4  | -- | --  |
|            | Ca(ICC2/PI489777)SNP_37390 | 662  | C | T | 4   | 5  | -- | --  |
|            | Ca(ICC2/PI489777)SNP_37391 | 674  | A | T | 3   | 5  | -- | --  |
|            | Ca(ICC2/PI489777)SNP_37392 | 1081 | C | T | 5   | 3  | -- | --  |
|            | Ca(ICC2/PI489777)SNP_37393 | 1237 | A | G | 4   | 4  | -- | --  |
| CakTC38340 | Ca(ICC2/PI489777)SNP_37394 | 920  | A | C | 5   | 5  | -- | TPR |
| CakTC42720 | Ca(ICC2/PI489777)SNP_37395 | 690  | A | G | 14  | 4  | -- | --  |
|            | Ca(ICC2/PI489777)SNP_37396 | 693  | G | A | 14  | 4  | -- | --  |
|            | Ca(ICC2/PI489777)SNP_37397 | 714  | A | G | 14  | 4  | -- | --  |
|            | Ca(ICC2/PI489777)SNP_37398 | 811  | G | A | 12  | 4  | -- | --  |
|            | Ca(ICC2/PI489777)SNP_37399 | 817  | A | C | 13  | 4  | -- | --  |
|            | Ca(ICC2/PI489777)SNP_37400 | 860  | G | C | 13  | 4  | -- | --  |
| CakTC37566 | Ca(ICC2/PI489777)SNP_37401 | 146  | T | C | 4   | 4  | -- | --  |
|            | Ca(ICC2/PI489777)SNP_37402 | 243  | G | C | 4   | 4  | -- | --  |
|            | Ca(ICC2/PI489777)SNP_37403 | 689  | A | T | 7   | 5  | -- | --  |
|            | Ca(ICC2/PI489777)SNP_37404 | 725  | T | G | 10  | 6  | -- | --  |
|            | Ca(ICC2/PI489777)SNP_37405 | 771  | A | G | 9   | 4  | -- | --  |
|            | Ca(ICC2/PI489777)SNP_37406 | 821  | T | A | 9   | 10 | -- | --  |
|            | Ca(ICC2/PI489777)SNP_37407 | 866  | A | G | 9   | 11 | -- | --  |
|            | Ca(ICC2/PI489777)SNP_37408 | 955  | A | C | 7   | 11 | -- | --  |
| CakTC28091 | Ca(ICC2/PI489777)SNP_37409 | 430  | C | G | 18  | 17 | -- | --  |
|            | Ca(ICC2/PI489777)SNP_37410 | 2245 | C | T | 23  | 29 | -- | --  |
| CakTC10234 | Ca(ICC2/PI489777)SNP_37411 | 124  | A | T | 10  | 9  | -- | --  |
|            | Ca(ICC2/PI489777)SNP_37412 | 359  | A | G | 12  | 12 | -- | --  |
|            | Ca(ICC2/PI489777)SNP_37413 | 463  | A | G | 11  | 7  | -- | --  |
|            | Ca(ICC2/PI489777)SNP_37414 | 495  | T | C | 11  | 8  | -- | --  |
|            | Ca(ICC2/PI489777)SNP_37415 | 504  | C | A | 10  | 8  | -- | --  |
| CakTC37734 | Ca(ICC2/PI489777)SNP_37416 | 902  | T | A | 3   | 5  | -- | --  |
| CakTC31547 | Ca(ICC2/PI489777)SNP_37417 | 145  | G | T | 6   | 10 | -- | --  |
|            | Ca(ICC2/PI489777)SNP_37418 | 280  | G | C | 7   | 9  | -- | --  |
|            | Ca(ICC2/PI489777)SNP_37419 | 358  | T | A | 5   | 6  | -- | --  |
|            | Ca(ICC2/PI489777)SNP_37420 | 855  | C | A | 3   | 5  | -- | --  |
| CakTC35304 | Ca(ICC2/PI489777)SNP_37421 | 1008 | A | G | 15  | 9  | -- | --  |
|            | Ca(ICC2/PI489777)SNP_37422 | 3096 | T | C | 5   | 3  | -- | --  |
| CakTC40936 | Ca(ICC2/PI489777)SNP_37423 | 904  | C | T | 23  | 15 | -- | --  |
|            | Ca(ICC2/PI489777)SNP_37424 | 928  | C | T | 25  | 15 | -- | --  |
|            | Ca(ICC2/PI489777)SNP_37425 | 1463 | T | C | 24  | 16 | -- | --  |
|            | Ca(ICC2/PI489777)SNP_37426 | 1498 | A | G | 18  | 14 | -- | --  |
| CakTC31193 | Ca(ICC2/PI489777)SNP_37427 | 1083 | C | T | 5   | 3  | -- | --  |
| CakTC29278 | Ca(ICC2/PI489777)SNP_37428 | 768  | T | C | 89  | 33 | -- | --  |
|            | Ca(ICC2/PI489777)SNP_37429 | 1289 | C | A | 137 | 70 | -- | --  |
|            | Ca(ICC2/PI489777)SNP_37430 | 1311 | G | C | 158 | 69 | -- | --  |
| CakTC40474 | Ca(ICC2/PI489777)SNP_37431 | 698  | A | G | 8   | 5  | -- | --  |
| CakTC41633 | Ca(ICC2/PI489777)SNP_37432 | 202  | G | T | 15  | 13 | -- | --  |
|            | Ca(ICC2/PI489777)SNP_37433 | 2412 | C | T | 11  | 12 | -- | --  |
| CakTC35203 | Ca(ICC2/PI489777)SNP_37434 | 247  | C | A | 7   | 4  | -- | --  |
|            | Ca(ICC2/PI489777)SNP_37435 | 516  | T | G | 6   | 7  | -- | --  |
|            | Ca(ICC2/PI489777)SNP_37436 | 993  | A | C | 3   | 8  | -- | --  |
|            | Ca(ICC2/PI489777)SNP_37437 | 1214 | C | T | 4   | 6  | -- | --  |
|            | Ca(ICC2/PI489777)SNP_37438 | 1656 | T | G | 8   | 6  | -- | --  |
|            | Ca(ICC2/PI489777)SNP_37439 | 2262 | T | G | 17  | 7  | -- | --  |

|            |                             |      |   |   |     |    |    |      |
|------------|-----------------------------|------|---|---|-----|----|----|------|
|            | Ca(ICCV2/PI489777)SNP_37440 | 2750 | A | G | 5   | 3  | -- | --   |
| CakTC34488 | Ca(ICCV2/PI489777)SNP_37441 | 837  | T | C | 9   | 5  | -- | --   |
|            | Ca(ICCV2/PI489777)SNP_37442 | 1096 | T | C | 12  | 6  | -- | --   |
|            | Ca(ICCV2/PI489777)SNP_37443 | 1201 | A | G | 8   | 6  | -- | --   |
|            | Ca(ICCV2/PI489777)SNP_37444 | 1203 | C | T | 9   | 6  | -- | --   |
|            | Ca(ICCV2/PI489777)SNP_37445 | 1449 | A | G | 9   | 4  | -- | --   |
|            | Ca(ICCV2/PI489777)SNP_37446 | 1554 | G | A | 9   | 5  | -- | --   |
|            | Ca(ICCV2/PI489777)SNP_37447 | 1581 | T | C | 6   | 4  | -- | --   |
|            | Ca(ICCV2/PI489777)SNP_37448 | 1596 | T | C | 5   | 4  | -- | --   |
|            | Ca(ICCV2/PI489777)SNP_37449 | 1662 | G | A | 3   | 3  | -- | --   |
|            | Ca(ICCV2/PI489777)SNP_37450 | 1909 | G | A | 4   | 7  | -- | --   |
| CakTC28853 | Ca(ICCV2/PI489777)SNP_37451 | 79   | G | T | 7   | 4  | -- | --   |
|            | Ca(ICCV2/PI489777)SNP_37452 | 1078 | A | G | 30  | 18 | -- | --   |
| CakTC40606 | Ca(ICCV2/PI489777)SNP_37453 | 1412 | A | G | 13  | 3  | -- | --   |
|            | Ca(ICCV2/PI489777)SNP_37454 | 1541 | C | T | 18  | 4  | -- | --   |
|            | Ca(ICCV2/PI489777)SNP_37455 | 1561 | C | T | 17  | 4  | -- | --   |
| CakTC37942 | Ca(ICCV2/PI489777)SNP_37456 | 100  | T | G | 5   | 3  | -- | FAR1 |
|            | Ca(ICCV2/PI489777)SNP_37457 | 458  | A | G | 7   | 10 | -- | FAR1 |
|            | Ca(ICCV2/PI489777)SNP_37458 | 482  | C | T | 6   | 9  | -- | FAR1 |
| CakTC26543 | Ca(ICCV2/PI489777)SNP_37459 | 762  | T | A | 84  | 32 | -- | --   |
|            | Ca(ICCV2/PI489777)SNP_37460 | 1744 | T | G | 64  | 27 | -- | --   |
|            | Ca(ICCV2/PI489777)SNP_37461 | 1828 | G | A | 53  | 19 | -- | --   |
| CakTC41981 | Ca(ICCV2/PI489777)SNP_37462 | 614  | T | A | 7   | 11 | -- | --   |
|            | Ca(ICCV2/PI489777)SNP_37463 | 1139 | G | A | 18  | 14 | -- | --   |
|            | Ca(ICCV2/PI489777)SNP_37464 | 1223 | C | T | 19  | 12 | -- | --   |
| CakTC24988 | Ca(ICCV2/PI489777)SNP_37465 | 830  | T | C | 25  | 3  | -- | --   |
| CakTC27026 | Ca(ICCV2/PI489777)SNP_37466 | 1601 | C | T | 3   | 4  | -- | --   |
| CakTC23826 | Ca(ICCV2/PI489777)SNP_37467 | 423  | C | T | 10  | 10 | -- | --   |
|            | Ca(ICCV2/PI489777)SNP_37468 | 643  | C | T | 13  | 7  | -- | --   |
|            | Ca(ICCV2/PI489777)SNP_37469 | 696  | C | G | 11  | 7  | -- | --   |
|            | Ca(ICCV2/PI489777)SNP_37470 | 749  | A | G | 12  | 8  | -- | --   |
|            | Ca(ICCV2/PI489777)SNP_37471 | 824  | G | T | 13  | 9  | -- | --   |
|            | Ca(ICCV2/PI489777)SNP_37472 | 1174 | G | A | 17  | 8  | -- | --   |
|            | Ca(ICCV2/PI489777)SNP_37473 | 2610 | C | T | 10  | 8  | -- | --   |
|            | Ca(ICCV2/PI489777)SNP_37474 | 3828 | A | G | 5   | 3  | -- | --   |
|            | Ca(ICCV2/PI489777)SNP_37475 | 4213 | T | G | 6   | 4  | -- | --   |
|            | Ca(ICCV2/PI489777)SNP_37476 | 4863 | T | C | 8   | 5  | -- | --   |
|            | Ca(ICCV2/PI489777)SNP_37477 | 4960 | C | T | 7   | 7  | -- | --   |
|            | Ca(ICCV2/PI489777)SNP_37478 | 5231 | A | C | 8   | 5  | -- | --   |
|            | Ca(ICCV2/PI489777)SNP_37479 | 6263 | G | T | 3   | 6  | -- | --   |
| CakTC09303 | Ca(ICCV2/PI489777)SNP_37480 | 1545 | T | C | 3   | 3  | -- | --   |
| CakTC39161 | Ca(ICCV2/PI489777)SNP_37481 | 392  | G | T | 16  | 3  | -- | --   |
| CakTC41074 | Ca(ICCV2/PI489777)SNP_37482 | 100  | A | T | 29  | 9  | -- | --   |
|            | Ca(ICCV2/PI489777)SNP_37483 | 377  | G | A | 62  | 42 | -- | --   |
|            | Ca(ICCV2/PI489777)SNP_37484 | 521  | G | A | 56  | 33 | -- | --   |
| CakTC33439 | Ca(ICCV2/PI489777)SNP_37485 | 541  | A | T | 4   | 4  | -- | --   |
| CakTC11099 | Ca(ICCV2/PI489777)SNP_37486 | 1334 | G | A | 4   | 3  | -- | --   |
| CakTC24260 | Ca(ICCV2/PI489777)SNP_37487 | 160  | C | A | 59  | 13 | -- | --   |
|            | Ca(ICCV2/PI489777)SNP_37488 | 314  | G | A | 87  | 20 | -- | --   |
|            | Ca(ICCV2/PI489777)SNP_37489 | 447  | A | C | 88  | 24 | -- | --   |
|            | Ca(ICCV2/PI489777)SNP_37490 | 461  | G | T | 87  | 26 | -- | --   |
|            | Ca(ICCV2/PI489777)SNP_37491 | 549  | A | C | 74  | 23 | -- | --   |
|            | Ca(ICCV2/PI489777)SNP_37492 | 579  | A | G | 99  | 23 | -- | --   |
|            | Ca(ICCV2/PI489777)SNP_37493 | 1112 | G | C | 142 | 15 | -- | --   |
|            | Ca(ICCV2/PI489777)SNP_37494 | 1385 | C | G | 137 | 24 | -- | --   |
|            | Ca(ICCV2/PI489777)SNP_37495 | 1734 | C | T | 84  | 9  | -- | --   |
| CakTC35994 | Ca(ICCV2/PI489777)SNP_37496 | 441  | G | C | 3   | 11 | -- | --   |
|            | Ca(ICCV2/PI489777)SNP_37497 | 929  | C | T | 11  | 18 | -- | --   |
|            | Ca(ICCV2/PI489777)SNP_37498 | 1647 | T | C | 10  | 9  | -- | --   |
|            | Ca(ICCV2/PI489777)SNP_37499 | 2427 | G | A | 14  | 10 | -- | --   |
| CakTC27009 | Ca(ICCV2/PI489777)SNP_37500 | 381  | A | G | 39  | 17 | -- | --   |
|            | Ca(ICCV2/PI489777)SNP_37501 | 432  | T | C | 38  | 12 | -- | --   |
|            | Ca(ICCV2/PI489777)SNP_37502 | 589  | T | C | 49  | 12 | -- | --   |
|            | Ca(ICCV2/PI489777)SNP_37503 | 1028 | G | A | 52  | 16 | -- | --   |
|            | Ca(ICCV2/PI489777)SNP_37504 | 1220 | T | G | 38  | 14 | -- | --   |
| CakTC33553 | Ca(ICCV2/PI489777)SNP_37505 | 513  | G | A | 37  | 53 | -- | --   |
|            | Ca(ICCV2/PI489777)SNP_37506 | 605  | A | G | 6   | 3  | -- | --   |
| CakTC32045 | Ca(ICCV2/PI489777)SNP_37507 | 733  | G | A | 15  | 7  | -- | --   |
|            | Ca(ICCV2/PI489777)SNP_37508 | 832  | C | T | 19  | 6  | -- | --   |
|            | Ca(ICCV2/PI489777)SNP_37509 | 1390 | A | G | 14  | 7  | -- | --   |
|            | Ca(ICCV2/PI489777)SNP_37510 | 1600 | A | T | 14  | 5  | -- | --   |
|            | Ca(ICCV2/PI489777)SNP_37511 | 1618 | C | A | 14  | 5  | -- | --   |
|            | Ca(ICCV2/PI489777)SNP_37512 | 1624 | T | C | 15  | 5  | -- | --   |
| CakTC30404 | Ca(ICCV2/PI489777)SNP_37513 | 1328 | A | G | 10  | 9  | -- | --   |

|            |                            |      |   |   |     |     |           |      |
|------------|----------------------------|------|---|---|-----|-----|-----------|------|
| CakTC04029 | Ca(ICC2/PI489777)SNP_37514 | 810  | A | G | 5   | 3   | --        | --   |
|            | Ca(ICC2/PI489777)SNP_37515 | 1119 | G | A | 4   | 4   | --        | --   |
| CakTC42220 | Ca(ICC2/PI489777)SNP_37516 | 669  | A | G | 4   | 16  | --        | --   |
| CakTC26085 | Ca(ICC2/PI489777)SNP_37517 | 504  | C | T | 15  | 4   | --        | --   |
| CakTC38908 | Ca(ICC2/PI489777)SNP_37518 | 173  | A | C | 16  | 7   | --        | --   |
| CakTC34595 | Ca(ICC2/PI489777)SNP_37519 | 1447 | G | A | 9   | 13  | --        | --   |
| CakTC41048 | Ca(ICC2/PI489777)SNP_37520 | 420  | A | G | 11  | 17  | --        | --   |
|            | Ca(ICC2/PI489777)SNP_37521 | 713  | T | C | 7   | 8   | --        | --   |
|            | Ca(ICC2/PI489777)SNP_37522 | 810  | A | G | 7   | 4   | --        | --   |
|            | Ca(ICC2/PI489777)SNP_37523 | 1239 | A | G | 12  | 11  | --        | --   |
|            | Ca(ICC2/PI489777)SNP_37524 | 1723 | C | T | 11  | 7   | --        | --   |
| CakTC41607 | Ca(ICC2/PI489777)SNP_37525 | 579  | G | C | 3   | 7   | --        | --   |
| CakTC10443 | Ca(ICC2/PI489777)SNP_37526 | 397  | T | C | 9   | 3   | --        | --   |
|            | Ca(ICC2/PI489777)SNP_37527 | 783  | C | T | 10  | 7   | --        | --   |
|            | Ca(ICC2/PI489777)SNP_37528 | 843  | A | G | 12  | 5   | --        | --   |
| CakTC37615 | Ca(ICC2/PI489777)SNP_37529 | 915  | T | G | 7   | 3   | --        | --   |
| CakTC24510 | Ca(ICC2/PI489777)SNP_37530 | 338  | A | G | 17  | 19  | --        | --   |
|            | Ca(ICC2/PI489777)SNP_37531 | 344  | T | C | 22  | 19  | --        | --   |
|            | Ca(ICC2/PI489777)SNP_37532 | 1054 | A | G | 16  | 10  | --        | --   |
| CakTC34614 | Ca(ICC2/PI489777)SNP_37533 | 1200 | C | T | 8   | 9   | --        | --   |
| CakTC40339 | Ca(ICC2/PI489777)SNP_37534 | 445  | G | A | 19  | 5   | --        | --   |
|            | Ca(ICC2/PI489777)SNP_37535 | 1480 | C | T | 23  | 10  | --        | --   |
|            | Ca(ICC2/PI489777)SNP_37536 | 1681 | G | A | 26  | 14  | --        | --   |
|            | Ca(ICC2/PI489777)SNP_37537 | 1705 | A | G | 21  | 14  | --        | --   |
| CakTC30610 | Ca(ICC2/PI489777)SNP_37538 | 377  | G | A | 6   | 4   | Young_pod | --   |
| CakTC31882 | Ca(ICC2/PI489777)SNP_37539 | 800  | G | C | 5   | 7   | --        | --   |
|            | Ca(ICC2/PI489777)SNP_37540 | 1352 | A | T | 4   | 5   | --        | --   |
|            | Ca(ICC2/PI489777)SNP_37541 | 1490 | T | C | 7   | 3   | --        | --   |
| CakTC09997 | Ca(ICC2/PI489777)SNP_37542 | 843  | T | C | 100 | 45  | --        | --   |
|            | Ca(ICC2/PI489777)SNP_37543 | 1049 | T | C | 108 | 54  | --        | --   |
|            | Ca(ICC2/PI489777)SNP_37544 | 1230 | A | T | 78  | 57  | --        | --   |
|            | Ca(ICC2/PI489777)SNP_37545 | 1905 | C | T | 176 | 105 | --        | --   |
|            | Ca(ICC2/PI489777)SNP_37546 | 1965 | T | C | 150 | 83  | --        | --   |
|            | Ca(ICC2/PI489777)SNP_37547 | 2086 | T | G | 38  | 50  | --        | --   |
| CakTC10795 | Ca(ICC2/PI489777)SNP_37548 | 546  | T | A | 20  | 12  | --        | --   |
|            | Ca(ICC2/PI489777)SNP_37549 | 637  | C | G | 30  | 25  | --        | --   |
|            | Ca(ICC2/PI489777)SNP_37550 | 838  | T | C | 47  | 24  | --        | --   |
|            | Ca(ICC2/PI489777)SNP_37551 | 1018 | G | A | 36  | 16  | --        | --   |
|            | Ca(ICC2/PI489777)SNP_37552 | 1024 | T | C | 41  | 16  | --        | --   |
|            | Ca(ICC2/PI489777)SNP_37553 | 1054 | G | C | 39  | 15  | --        | --   |
|            | Ca(ICC2/PI489777)SNP_37554 | 1309 | T | C | 57  | 21  | --        | --   |
|            | Ca(ICC2/PI489777)SNP_37555 | 1360 | T | C | 61  | 17  | --        | --   |
| CakTC33442 | Ca(ICC2/PI489777)SNP_37556 | 648  | T | C | 8   | 3   | --        | --   |
|            | Ca(ICC2/PI489777)SNP_37557 | 3185 | A | G | 5   | 3   | --        | --   |
|            | Ca(ICC2/PI489777)SNP_37558 | 3291 | T | C | 5   | 4   | --        | --   |
|            | Ca(ICC2/PI489777)SNP_37559 | 3796 | G | A | 5   | 4   | --        | --   |
| CakTC26681 | Ca(ICC2/PI489777)SNP_37560 | 765  | A | T | 19  | 19  | --        | --   |
|            | Ca(ICC2/PI489777)SNP_37561 | 774  | T | C | 19  | 10  | --        | --   |
|            | Ca(ICC2/PI489777)SNP_37562 | 930  | G | C | 13  | 13  | --        | --   |
|            | Ca(ICC2/PI489777)SNP_37563 | 948  | T | C | 11  | 10  | --        | --   |
|            | Ca(ICC2/PI489777)SNP_37564 | 1061 | A | G | 8   | 10  | --        | --   |
|            | Ca(ICC2/PI489777)SNP_37565 | 1127 | T | C | 7   | 9   | --        | --   |
| CakTC39778 | Ca(ICC2/PI489777)SNP_37566 | 947  | G | A | 15  | 4   | --        | C2H2 |
| CakTC42950 | Ca(ICC2/PI489777)SNP_37567 | 654  | T | C | 17  | 3   | --        | C2H2 |
|            | Ca(ICC2/PI489777)SNP_37568 | 917  | G | C | 23  | 5   | --        | C2H2 |
|            | Ca(ICC2/PI489777)SNP_37569 | 941  | G | A | 27  | 5   | --        | C2H2 |
|            | Ca(ICC2/PI489777)SNP_37570 | 1746 | G | A | 12  | 8   | --        | C2H2 |
|            | Ca(ICC2/PI489777)SNP_37571 | 1779 | C | T | 7   | 5   | --        | C2H2 |
|            | Ca(ICC2/PI489777)SNP_37572 | 1785 | T | C | 8   | 6   | --        | C2H2 |
| CakTC23614 | Ca(ICC2/PI489777)SNP_37573 | 238  | C | A | 20  | 6   | --        | --   |
|            | Ca(ICC2/PI489777)SNP_37574 | 621  | C | T | 68  | 56  | --        | --   |
|            | Ca(ICC2/PI489777)SNP_37575 | 735  | G | T | 56  | 47  | --        | --   |
|            | Ca(ICC2/PI489777)SNP_37576 | 807  | T | A | 59  | 39  | --        | --   |
|            | Ca(ICC2/PI489777)SNP_37577 | 840  | G | A | 52  | 31  | --        | --   |
|            | Ca(ICC2/PI489777)SNP_37578 | 870  | C | T | 51  | 27  | --        | --   |
|            | Ca(ICC2/PI489777)SNP_37579 | 1014 | G | A | 13  | 6   | --        | --   |
| CakTC27299 | Ca(ICC2/PI489777)SNP_37580 | 575  | G | A | 9   | 8   | --        | --   |
|            | Ca(ICC2/PI489777)SNP_37581 | 1417 | C | T | 5   | 4   | --        | --   |
|            | Ca(ICC2/PI489777)SNP_37582 | 1551 | A | G | 5   | 3   | --        | --   |
|            | Ca(ICC2/PI489777)SNP_37583 | 1587 | A | G | 5   | 3   | --        | --   |
| CakTC26546 | Ca(ICC2/PI489777)SNP_37584 | 446  | T | C | 24  | 13  | --        | bZIP |
|            | Ca(ICC2/PI489777)SNP_37585 | 458  | T | C | 22  | 13  | --        | bZIP |
|            | Ca(ICC2/PI489777)SNP_37586 | 628  | G | A | 25  | 10  | --        | bZIP |
|            | Ca(ICC2/PI489777)SNP_37587 | 935  | G | A | 20  | 9   | --        | bZIP |

|            |                             |      |   |   |    |    |      |      |
|------------|-----------------------------|------|---|---|----|----|------|------|
|            | Ca(ICCV2/PI489777)SNP_37588 | 959  | T | A | 20 | 8  | --   | bZIP |
|            | Ca(ICCV2/PI489777)SNP_37589 | 1319 | G | A | 14 | 8  | --   | bZIP |
|            | Ca(ICCV2/PI489777)SNP_37590 | 1337 | A | G | 13 | 6  | --   | bZIP |
|            | Ca(ICCV2/PI489777)SNP_37591 | 1370 | C | A | 15 | 7  | --   | bZIP |
|            | Ca(ICCV2/PI489777)SNP_37592 | 1478 | A | C | 13 | 12 | --   | bZIP |
|            | Ca(ICCV2/PI489777)SNP_37593 | 1543 | T | A | 13 | 13 | --   | bZIP |
|            | Ca(ICCV2/PI489777)SNP_37594 | 1790 | C | A | 40 | 18 | --   | bZIP |
|            | Ca(ICCV2/PI489777)SNP_37595 | 1837 | G | T | 37 | 13 | --   | bZIP |
| CakTC37478 | Ca(ICCV2/PI489777)SNP_37596 | 78   | C | G | 5  | 5  | --   | --   |
|            | Ca(ICCV2/PI489777)SNP_37597 | 934  | T | A | 12 | 5  | --   | --   |
| CakTC31247 | Ca(ICCV2/PI489777)SNP_37598 | 1367 | G | A | 4  | 3  | Root | --   |
| CakTC24603 | Ca(ICCV2/PI489777)SNP_37599 | 166  | C | T | 13 | 5  | --   | --   |
| CakTC42689 | Ca(ICCV2/PI489777)SNP_37600 | 649  | G | A | 8  | 12 | --   | --   |
|            | Ca(ICCV2/PI489777)SNP_37601 | 739  | T | C | 8  | 6  | --   | --   |
| CakTC39365 | Ca(ICCV2/PI489777)SNP_37602 | 1295 | C | T | 4  | 3  | --   | --   |
| CakTC42299 | Ca(ICCV2/PI489777)SNP_37603 | 74   | G | C | 26 | 20 | --   | --   |
|            | Ca(ICCV2/PI489777)SNP_37604 | 237  | G | A | 33 | 23 | --   | --   |
| CakTC28420 | Ca(ICCV2/PI489777)SNP_37605 | 626  | T | C | 9  | 11 | --   | --   |
|            | Ca(ICCV2/PI489777)SNP_37606 | 695  | T | C | 11 | 13 | --   | --   |
|            | Ca(ICCV2/PI489777)SNP_37607 | 896  | G | A | 13 | 7  | --   | --   |
|            | Ca(ICCV2/PI489777)SNP_37608 | 1730 | C | T | 13 | 11 | --   | --   |
|            | Ca(ICCV2/PI489777)SNP_37609 | 1827 | T | C | 10 | 9  | --   | --   |
| CakTC34106 | Ca(ICCV2/PI489777)SNP_37610 | 733  | G | A | 13 | 7  | --   | --   |
|            | Ca(ICCV2/PI489777)SNP_37611 | 802  | G | A | 13 | 7  | --   | --   |
|            | Ca(ICCV2/PI489777)SNP_37612 | 901  | A | G | 17 | 5  | --   | --   |
|            | Ca(ICCV2/PI489777)SNP_37613 | 1839 | G | A | 19 | 9  | --   | --   |
| CakTC33397 | Ca(ICCV2/PI489777)SNP_37614 | 643  | G | C | 18 | 8  | --   | --   |
|            | Ca(ICCV2/PI489777)SNP_37615 | 961  | G | A | 14 | 12 | --   | --   |
|            | Ca(ICCV2/PI489777)SNP_37616 | 1969 | T | G | 8  | 11 | --   | --   |
|            | Ca(ICCV2/PI489777)SNP_37617 | 2142 | A | G | 3  | 3  | --   | --   |
| CakTC31179 | Ca(ICCV2/PI489777)SNP_37618 | 1228 | A | G | 14 | 4  | --   | --   |
| CakTC29650 | Ca(ICCV2/PI489777)SNP_37619 | 343  | A | G | 5  | 5  | --   | --   |
| CakTC25716 | Ca(ICCV2/PI489777)SNP_37620 | 708  | G | A | 5  | 8  | --   | --   |
|            | Ca(ICCV2/PI489777)SNP_37621 | 803  | A | G | 11 | 3  | --   | --   |
|            | Ca(ICCV2/PI489777)SNP_37622 | 959  | G | A | 11 | 3  | --   | --   |
| CakTC22653 | Ca(ICCV2/PI489777)SNP_37623 | 468  | C | T | 20 | 3  | --   | --   |
|            | Ca(ICCV2/PI489777)SNP_37624 | 485  | A | G | 25 | 3  | --   | --   |
|            | Ca(ICCV2/PI489777)SNP_37625 | 703  | G | A | 29 | 3  | --   | --   |
|            | Ca(ICCV2/PI489777)SNP_37626 | 721  | C | T | 17 | 3  | --   | --   |
|            | Ca(ICCV2/PI489777)SNP_37627 | 789  | C | T | 29 | 3  | --   | --   |
|            | Ca(ICCV2/PI489777)SNP_37628 | 882  | C | G | 6  | 4  | --   | --   |
|            | Ca(ICCV2/PI489777)SNP_37629 | 897  | T | A | 3  | 5  | --   | --   |
|            | Ca(ICCV2/PI489777)SNP_37630 | 955  | G | A | 3  | 4  | --   | --   |
|            | Ca(ICCV2/PI489777)SNP_37631 | 1005 | G | C | 6  | 5  | --   | --   |
|            | Ca(ICCV2/PI489777)SNP_37632 | 1017 | T | C | 7  | 5  | --   | --   |
|            | Ca(ICCV2/PI489777)SNP_37633 | 1050 | A | T | 8  | 5  | --   | --   |
|            | Ca(ICCV2/PI489777)SNP_37634 | 1093 | A | G | 8  | 5  | --   | --   |
|            | Ca(ICCV2/PI489777)SNP_37635 | 1161 | G | T | 8  | 5  | --   | --   |
|            | Ca(ICCV2/PI489777)SNP_37636 | 1162 | T | C | 7  | 5  | --   | --   |
|            | Ca(ICCV2/PI489777)SNP_37637 | 1241 | A | G | 8  | 5  | --   | --   |
|            | Ca(ICCV2/PI489777)SNP_37638 | 1308 | G | T | 8  | 5  | --   | --   |
| CakTC38126 | Ca(ICCV2/PI489777)SNP_37639 | 234  | C | G | 8  | 5  | --   | --   |
|            | Ca(ICCV2/PI489777)SNP_37640 | 238  | A | C | 8  | 7  | --   | --   |
|            | Ca(ICCV2/PI489777)SNP_37641 | 325  | G | A | 8  | 10 | --   | --   |
|            | Ca(ICCV2/PI489777)SNP_37642 | 370  | C | G | 12 | 8  | --   | --   |
|            | Ca(ICCV2/PI489777)SNP_37643 | 443  | G | A | 9  | 8  | --   | --   |
|            | Ca(ICCV2/PI489777)SNP_37644 | 471  | C | T | 10 | 11 | --   | --   |
|            | Ca(ICCV2/PI489777)SNP_37645 | 640  | A | C | 8  | 12 | --   | --   |
|            | Ca(ICCV2/PI489777)SNP_37646 | 748  | T | A | 8  | 9  | --   | --   |
|            | Ca(ICCV2/PI489777)SNP_37647 | 759  | G | C | 8  | 8  | --   | --   |
| CakTC27294 | Ca(ICCV2/PI489777)SNP_37648 | 60   | T | G | 5  | 10 | --   | --   |
|            | Ca(ICCV2/PI489777)SNP_37649 | 1033 | A | C | 63 | 40 | --   | --   |
|            | Ca(ICCV2/PI489777)SNP_37650 | 1672 | A | G | 30 | 16 | --   | --   |
| CakTC23593 | Ca(ICCV2/PI489777)SNP_37651 | 154  | G | A | 13 | 11 | --   | --   |
|            | Ca(ICCV2/PI489777)SNP_37652 | 378  | C | T | 11 | 9  | --   | --   |
|            | Ca(ICCV2/PI489777)SNP_37653 | 434  | A | G | 8  | 9  | --   | --   |
|            | Ca(ICCV2/PI489777)SNP_37654 | 1465 | G | A | 18 | 3  | --   | --   |
| CakTC31454 | Ca(ICCV2/PI489777)SNP_37655 | 297  | C | T | 5  | 4  | --   | --   |
|            | Ca(ICCV2/PI489777)SNP_37656 | 356  | G | A | 6  | 9  | --   | --   |
| CakTC13800 | Ca(ICCV2/PI489777)SNP_37657 | 210  | C | A | 6  | 4  | --   | --   |
|            | Ca(ICCV2/PI489777)SNP_37658 | 298  | C | T | 7  | 6  | --   | --   |
|            | Ca(ICCV2/PI489777)SNP_37659 | 333  | A | G | 6  | 7  | --   | --   |
| CakTC34608 | Ca(ICCV2/PI489777)SNP_37660 | 342  | C | A | 7  | 8  | --   | --   |
|            | Ca(ICCV2/PI489777)SNP_37661 | 2008 | T | G | 4  | 5  | --   | --   |

|            |                            |      |   |   |     |     |           |     |
|------------|----------------------------|------|---|---|-----|-----|-----------|-----|
| CakTC42453 | Ca(ICC2/PI489777)SNP_37662 | 448  | T | C | 122 | 141 | --        | --  |
| CakTC35191 | Ca(ICC2/PI489777)SNP_37663 | 173  | A | C | 27  | 8   | --        | --  |
|            | Ca(ICC2/PI489777)SNP_37664 | 176  | T | A | 38  | 8   | --        | --  |
|            | Ca(ICC2/PI489777)SNP_37665 | 210  | G | T | 43  | 8   | --        | --  |
|            | Ca(ICC2/PI489777)SNP_37666 | 557  | A | T | 44  | 15  | --        | --  |
|            | Ca(ICC2/PI489777)SNP_37667 | 589  | G | A | 56  | 11  | --        | --  |
|            | Ca(ICC2/PI489777)SNP_37668 | 2099 | G | A | 28  | 4   | --        | --  |
| CakTC33359 | Ca(ICC2/PI489777)SNP_37669 | 2662 | T | C | 6   | 3   | --        | --  |
| CakTC28104 | Ca(ICC2/PI489777)SNP_37670 | 162  | A | C | 5   | 3   | --        | --  |
|            | Ca(ICC2/PI489777)SNP_37671 | 776  | A | T | 10  | 5   | --        | --  |
|            | Ca(ICC2/PI489777)SNP_37672 | 801  | T | C | 12  | 5   | --        | --  |
|            | Ca(ICC2/PI489777)SNP_37673 | 825  | A | C | 12  | 5   | --        | --  |
|            | Ca(ICC2/PI489777)SNP_37674 | 879  | T | C | 14  | 6   | --        | --  |
| CakTC37631 | Ca(ICC2/PI489777)SNP_37675 | 1135 | G | A | 6   | 4   | --        | --  |
| CakTC33142 | Ca(ICC2/PI489777)SNP_37676 | 125  | G | C | 19  | 12  | --        | --  |
|            | Ca(ICC2/PI489777)SNP_37677 | 345  | G | C | 18  | 12  | --        | --  |
|            | Ca(ICC2/PI489777)SNP_37678 | 363  | C | A | 18  | 12  | --        | --  |
|            | Ca(ICC2/PI489777)SNP_37679 | 367  | C | T | 15  | 12  | --        | --  |
|            | Ca(ICC2/PI489777)SNP_37680 | 495  | C | A | 5   | 6   | --        | --  |
| CakTC41856 | Ca(ICC2/PI489777)SNP_37681 | 891  | G | C | 4   | 8   | --        | --  |
|            | Ca(ICC2/PI489777)SNP_37682 | 1757 | A | C | 12  | 5   | --        | --  |
|            | Ca(ICC2/PI489777)SNP_37683 | 1834 | A | T | 4   | 5   | --        | --  |
| CakTC29957 | Ca(ICC2/PI489777)SNP_37684 | 94   | C | T | 3   | 4   | --        | --  |
|            | Ca(ICC2/PI489777)SNP_37685 | 160  | A | G | 4   | 11  | --        | --  |
|            | Ca(ICC2/PI489777)SNP_37686 | 732  | T | A | 47  | 17  | --        | --  |
|            | Ca(ICC2/PI489777)SNP_37687 | 1071 | T | A | 48  | 16  | --        | --  |
|            | Ca(ICC2/PI489777)SNP_37688 | 1680 | A | G | 25  | 7   | --        | --  |
|            | Ca(ICC2/PI489777)SNP_37689 | 2058 | T | C | 19  | 15  | --        | --  |
|            | Ca(ICC2/PI489777)SNP_37690 | 2394 | A | C | 26  | 11  | --        | --  |
|            | Ca(ICC2/PI489777)SNP_37691 | 2406 | G | T | 26  | 11  | --        | --  |
|            | Ca(ICC2/PI489777)SNP_37692 | 2451 | A | G | 24  | 10  | --        | --  |
|            | Ca(ICC2/PI489777)SNP_37693 | 2626 | C | T | 19  | 11  | --        | --  |
|            | Ca(ICC2/PI489777)SNP_37694 | 3100 | G | A | 7   | 4   | --        | --  |
| CakTC37089 | Ca(ICC2/PI489777)SNP_37695 | 147  | C | T | 5   | 4   | Flower    | bud |
| CakTC28163 | Ca(ICC2/PI489777)SNP_37696 | 1097 | T | C | 32  | 13  | --        | --  |
|            | Ca(ICC2/PI489777)SNP_37697 | 1205 | T | A | 30  | 21  | --        | --  |
|            | Ca(ICC2/PI489777)SNP_37698 | 1490 | C | T | 25  | 16  | --        | --  |
| CakTC34393 | Ca(ICC2/PI489777)SNP_37699 | 1152 | A | G | 3   | 3   | --        | --  |
| CakTC38725 | Ca(ICC2/PI489777)SNP_37700 | 1681 | G | C | 7   | 9   | --        | --  |
|            | Ca(ICC2/PI489777)SNP_37701 | 2759 | G | C | 5   | 29  | --        | --  |
|            | Ca(ICC2/PI489777)SNP_37702 | 2829 | A | G | 5   | 14  | --        | --  |
| CakTC43082 | Ca(ICC2/PI489777)SNP_37703 | 103  | A | G | 13  | 3   | --        | --  |
|            | Ca(ICC2/PI489777)SNP_37704 | 1069 | C | T | 6   | 7   | --        | --  |
|            | Ca(ICC2/PI489777)SNP_37705 | 1333 | T | C | 10  | 7   | --        | --  |
| CakTC42284 | Ca(ICC2/PI489777)SNP_37706 | 66   | G | C | 7   | 3   | --        | --  |
|            | Ca(ICC2/PI489777)SNP_37707 | 144  | G | A | 9   | 5   | --        | --  |
|            | Ca(ICC2/PI489777)SNP_37708 | 145  | G | T | 8   | 5   | --        | --  |
|            | Ca(ICC2/PI489777)SNP_37709 | 648  | G | T | 13  | 6   | --        | --  |
|            | Ca(ICC2/PI489777)SNP_37710 | 699  | C | G | 8   | 5   | --        | --  |
| CakTC25109 | Ca(ICC2/PI489777)SNP_37711 | 342  | T | C | 19  | 8   | --        | --  |
|            | Ca(ICC2/PI489777)SNP_37712 | 1277 | C | T | 72  | 55  | --        | --  |
|            | Ca(ICC2/PI489777)SNP_37713 | 2433 | T | G | 11  | 16  | --        | --  |
| CakTC37231 | Ca(ICC2/PI489777)SNP_37714 | 43   | C | A | 7   | 6   | Young_pod | --  |
|            | Ca(ICC2/PI489777)SNP_37715 | 615  | A | C | 10  | 7   | Young_pod | --  |
|            | Ca(ICC2/PI489777)SNP_37716 | 1209 | C | A | 27  | 8   | Young_pod | --  |
| CakTC22346 | Ca(ICC2/PI489777)SNP_37717 | 1377 | T | A | 4   | 3   | --        | --  |
|            | Ca(ICC2/PI489777)SNP_37718 | 1397 | C | A | 4   | 3   | --        | --  |
|            | Ca(ICC2/PI489777)SNP_37719 | 1400 | T | C | 4   | 3   | --        | --  |
|            | Ca(ICC2/PI489777)SNP_37720 | 1441 | G | A | 5   | 3   | --        | --  |
|            | Ca(ICC2/PI489777)SNP_37721 | 1481 | G | A | 5   | 3   | --        | --  |
|            | Ca(ICC2/PI489777)SNP_37722 | 1588 | C | G | 5   | 3   | --        | --  |
| CakTC35760 | Ca(ICC2/PI489777)SNP_37723 | 261  | G | C | 6   | 10  | --        | --  |
|            | Ca(ICC2/PI489777)SNP_37724 | 672  | C | T | 17  | 5   | --        | --  |
|            | Ca(ICC2/PI489777)SNP_37725 | 1958 | G | A | 7   | 18  | --        | --  |
|            | Ca(ICC2/PI489777)SNP_37726 | 1992 | A | G | 8   | 21  | --        | --  |
|            | Ca(ICC2/PI489777)SNP_37727 | 2367 | G | A | 8   | 6   | --        | --  |
|            | Ca(ICC2/PI489777)SNP_37728 | 2817 | G | C | 10  | 13  | --        | --  |
|            | Ca(ICC2/PI489777)SNP_37729 | 2931 | G | A | 11  | 11  | --        | --  |
| CakTC04762 | Ca(ICC2/PI489777)SNP_37730 | 435  | G | A | 10  | 17  | --        | --  |
|            | Ca(ICC2/PI489777)SNP_37731 | 551  | A | G | 8   | 14  | --        | --  |
|            | Ca(ICC2/PI489777)SNP_37732 | 976  | T | C | 9   | 7   | --        | --  |
| CakTC26284 | Ca(ICC2/PI489777)SNP_37733 | 27   | G | A | 19  | 4   | --        | --  |
|            | Ca(ICC2/PI489777)SNP_37734 | 581  | G | C | 7   | 5   | --        | --  |
| CakTC38407 | Ca(ICC2/PI489777)SNP_37735 | 523  | C | T | 4   | 8   | --        | --  |

|            |                            |      |   |   |    |    |           |           |
|------------|----------------------------|------|---|---|----|----|-----------|-----------|
|            | Ca(ICC2/PI489777)SNP_37736 | 524  | T | G | 4  | 8  | --        | --        |
| CakTC37271 | Ca(ICC2/PI489777)SNP_37737 | 1029 | T | C | 4  | 5  | --        | --        |
| CakTC35111 | Ca(ICC2/PI489777)SNP_37738 | 138  | G | T | 5  | 10 | --        | --        |
|            | Ca(ICC2/PI489777)SNP_37739 | 167  | T | G | 5  | 10 | --        | --        |
|            | Ca(ICC2/PI489777)SNP_37740 | 1212 | A | G | 23 | 10 | --        | --        |
|            | Ca(ICC2/PI489777)SNP_37741 | 3555 | T | C | 19 | 18 | --        | --        |
| CakTC22420 | Ca(ICC2/PI489777)SNP_37742 | 1380 | G | A | 5  | 4  | --        | --        |
| CakTC21556 | Ca(ICC2/PI489777)SNP_37743 | 1015 | A | G | 5  | 6  | --        | --        |
| CakTC35665 | Ca(ICC2/PI489777)SNP_37744 | 426  | C | T | 27 | 8  | --        | --        |
|            | Ca(ICC2/PI489777)SNP_37745 | 590  | A | G | 27 | 9  | --        | --        |
|            | Ca(ICC2/PI489777)SNP_37746 | 591  | C | T | 29 | 9  | --        | --        |
|            | Ca(ICC2/PI489777)SNP_37747 | 960  | T | C | 29 | 9  | --        | --        |
|            | Ca(ICC2/PI489777)SNP_37748 | 1098 | A | G | 27 | 10 | --        | --        |
|            | Ca(ICC2/PI489777)SNP_37749 | 1275 | C | T | 27 | 9  | --        | --        |
|            | Ca(ICC2/PI489777)SNP_37750 | 1353 | G | T | 23 | 9  | --        | --        |
|            | Ca(ICC2/PI489777)SNP_37751 | 1614 | G | T | 20 | 14 | --        | --        |
|            | Ca(ICC2/PI489777)SNP_37752 | 2170 | T | C | 18 | 13 | --        | --        |
|            | Ca(ICC2/PI489777)SNP_37753 | 2205 | C | T | 15 | 14 | --        | --        |
|            | Ca(ICC2/PI489777)SNP_37754 | 2229 | A | G | 14 | 9  | --        | --        |
|            | Ca(ICC2/PI489777)SNP_37755 | 2307 | T | A | 14 | 10 | --        | --        |
|            | Ca(ICC2/PI489777)SNP_37756 | 3028 | T | C | 30 | 33 | --        | --        |
| CakTC29805 | Ca(ICC2/PI489777)SNP_37757 | 263  | C | T | 13 | 8  | Shoot     | zf-HD     |
| CakTC38202 | Ca(ICC2/PI489777)SNP_37758 | 1035 | C | G | 14 | 7  | --        | --        |
| CakTC11043 | Ca(ICC2/PI489777)SNP_37759 | 400  | G | A | 24 | 15 | --        | --        |
|            | Ca(ICC2/PI489777)SNP_37760 | 958  | A | G | 19 | 4  | --        | --        |
| CakTC24254 | Ca(ICC2/PI489777)SNP_37761 | 251  | A | G | 19 | 3  | --        | --        |
|            | Ca(ICC2/PI489777)SNP_37762 | 400  | G | A | 20 | 5  | --        | --        |
|            | Ca(ICC2/PI489777)SNP_37763 | 894  | A | G | 39 | 8  | --        | --        |
|            | Ca(ICC2/PI489777)SNP_37764 | 1368 | C | T | 9  | 3  | --        | --        |
| CakTC34541 | Ca(ICC2/PI489777)SNP_37765 | 121  | G | A | 4  | 5  | --        | --        |
|            | Ca(ICC2/PI489777)SNP_37766 | 177  | G | A | 4  | 4  | --        | --        |
|            | Ca(ICC2/PI489777)SNP_37767 | 481  | A | G | 5  | 6  | --        | --        |
| CakTC08286 | Ca(ICC2/PI489777)SNP_37768 | 1404 | T | C | 4  | 3  | Flower    | bud       |
| CakTC33126 | Ca(ICC2/PI489777)SNP_37769 | 2016 | T | G | 7  | 9  | Young_pod | --        |
| CakTC40703 | Ca(ICC2/PI489777)SNP_37770 | 44   | T | C | 17 | 11 | --        | --        |
|            | Ca(ICC2/PI489777)SNP_37771 | 312  | T | G | 19 | 16 | --        | --        |
|            | Ca(ICC2/PI489777)SNP_37772 | 435  | A | G | 16 | 20 | --        | --        |
|            | Ca(ICC2/PI489777)SNP_37773 | 561  | C | T | 21 | 13 | --        | --        |
|            | Ca(ICC2/PI489777)SNP_37774 | 562  | G | C | 21 | 13 | --        | --        |
|            | Ca(ICC2/PI489777)SNP_37775 | 1071 | T | G | 17 | 12 | --        | --        |
| CakTC32642 | Ca(ICC2/PI489777)SNP_37776 | 275  | T | A | 4  | 4  | --        | --        |
|            | Ca(ICC2/PI489777)SNP_37777 | 277  | A | T | 4  | 4  | --        | --        |
|            | Ca(ICC2/PI489777)SNP_37778 | 338  | C | T | 4  | 4  | --        | --        |
|            | Ca(ICC2/PI489777)SNP_37779 | 386  | G | A | 4  | 4  | --        | --        |
|            | Ca(ICC2/PI489777)SNP_37780 | 883  | A | G | 4  | 7  | --        | --        |
| CakTC31486 | Ca(ICC2/PI489777)SNP_37781 | 41   | G | T | 7  | 3  | --        | TPR       |
|            | Ca(ICC2/PI489777)SNP_37782 | 518  | G | A | 8  | 7  | --        | TPR       |
|            | Ca(ICC2/PI489777)SNP_37783 | 553  | G | A | 8  | 7  | --        | TPR       |
| CakTC38898 | Ca(ICC2/PI489777)SNP_37784 | 432  | A | G | 4  | 3  | --        | --        |
| CakTC39122 | Ca(ICC2/PI489777)SNP_37785 | 463  | G | A | 12 | 19 | --        | --        |
|            | Ca(ICC2/PI489777)SNP_37786 | 844  | G | A | 24 | 14 | --        | --        |
|            | Ca(ICC2/PI489777)SNP_37787 | 1060 | G | A | 23 | 15 | --        | --        |
|            | Ca(ICC2/PI489777)SNP_37788 | 1419 | A | G | 6  | 6  | --        | --        |
| CakTC39768 | Ca(ICC2/PI489777)SNP_37789 | 258  | C | A | 23 | 5  | --        | --        |
|            | Ca(ICC2/PI489777)SNP_37790 | 452  | T | A | 22 | 3  | --        | --        |
|            | Ca(ICC2/PI489777)SNP_37791 | 589  | G | A | 10 | 4  | --        | --        |
| CakTC13849 | Ca(ICC2/PI489777)SNP_37792 | 568  | A | G | 8  | 12 | --        | --        |
| CakTC18450 | Ca(ICC2/PI489777)SNP_37793 | 370  | C | G | 19 | 14 | --        | --        |
|            | Ca(ICC2/PI489777)SNP_37794 | 374  | G | A | 19 | 14 | --        | --        |
| CakTC40729 | Ca(ICC2/PI489777)SNP_37795 | 559  | T | A | 3  | 3  | --        | --        |
| CakTC30915 | Ca(ICC2/PI489777)SNP_37796 | 771  | C | T | 21 | 6  | --        | --        |
| CakTC40947 | Ca(ICC2/PI489777)SNP_37797 | 574  | A | G | 85 | 56 | --        | --        |
| CakTC25322 | Ca(ICC2/PI489777)SNP_37798 | 1743 | G | A | 9  | 6  | --        | --        |
|            | Ca(ICC2/PI489777)SNP_37799 | 1776 | T | C | 7  | 5  | --        | --        |
| CakTC37201 | Ca(ICC2/PI489777)SNP_37800 | 582  | A | T | 28 | 14 | --        | AP2-EREBP |
|            | Ca(ICC2/PI489777)SNP_37801 | 621  | T | C | 33 | 13 | --        | AP2-EREBP |
| CakTC34197 | Ca(ICC2/PI489777)SNP_37802 | 217  | G | C | 18 | 47 | --        | TPR       |
|            | Ca(ICC2/PI489777)SNP_37803 | 232  | T | C | 17 | 45 | --        | TPR       |
|            | Ca(ICC2/PI489777)SNP_37804 | 863  | G | A | 26 | 49 | --        | TPR       |
|            | Ca(ICC2/PI489777)SNP_37805 | 1520 | G | T | 42 | 89 | --        | TPR       |
|            | Ca(ICC2/PI489777)SNP_37806 | 1787 | G | A | 31 | 72 | --        | TPR       |
|            | Ca(ICC2/PI489777)SNP_37807 | 2052 | C | T | 9  | 17 | --        | TPR       |
| CakTC42128 | Ca(ICC2/PI489777)SNP_37808 | 108  | G | A | 20 | 6  | --        | --        |
|            | Ca(ICC2/PI489777)SNP_37809 | 186  | T | C | 23 | 10 | --        | --        |

|            |                            |      |   |   |    |    |           |    |
|------------|----------------------------|------|---|---|----|----|-----------|----|
|            | Ca(ICC2/PI489777)SNP_37810 | 193  | T | A | 23 | 9  | --        | -- |
| CakTC30119 | Ca(ICC2/PI489777)SNP_37811 | 132  | G | A | 7  | 4  | Young_pod | -- |
|            | Ca(ICC2/PI489777)SNP_37812 | 1085 | C | T | 3  | 3  | Young_pod | -- |
|            | Ca(ICC2/PI489777)SNP_37813 | 1169 | G | A | 3  | 3  | Young_pod | -- |
| CakTC27553 | Ca(ICC2/PI489777)SNP_37814 | 180  | C | T | 10 | 6  | --        | -- |
|            | Ca(ICC2/PI489777)SNP_37815 | 204  | G | A | 10 | 6  | --        | -- |
|            | Ca(ICC2/PI489777)SNP_37816 | 226  | G | A | 10 | 6  | --        | -- |
|            | Ca(ICC2/PI489777)SNP_37817 | 464  | G | T | 7  | 3  | --        | -- |
|            | Ca(ICC2/PI489777)SNP_37818 | 477  | T | C | 8  | 7  | --        | -- |
|            | Ca(ICC2/PI489777)SNP_37819 | 513  | T | G | 11 | 7  | --        | -- |
|            | Ca(ICC2/PI489777)SNP_37820 | 545  | A | G | 14 | 7  | --        | -- |
|            | Ca(ICC2/PI489777)SNP_37821 | 693  | T | C | 17 | 5  | --        | -- |
|            | Ca(ICC2/PI489777)SNP_37822 | 755  | C | T | 25 | 8  | --        | -- |
|            | Ca(ICC2/PI489777)SNP_37823 | 1751 | A | G | 33 | 10 | --        | -- |
|            | Ca(ICC2/PI489777)SNP_37824 | 1953 | T | C | 13 | 4  | --        | -- |
| CakTC33778 | Ca(ICC2/PI489777)SNP_37825 | 321  | A | G | 8  | 6  | --        | -- |
| CakTC40675 | Ca(ICC2/PI489777)SNP_37826 | 231  | G | T | 3  | 3  | --        | -- |
|            | Ca(ICC2/PI489777)SNP_37827 | 595  | G | C | 4  | 3  | --        | -- |
|            | Ca(ICC2/PI489777)SNP_37828 | 637  | A | G | 4  | 3  | --        | -- |
| CakTC40347 | Ca(ICC2/PI489777)SNP_37829 | 653  | A | G | 7  | 4  | --        | -- |
| CakTC41278 | Ca(ICC2/PI489777)SNP_37830 | 66   | A | G | 43 | 33 | --        | -- |
| CakTC38686 | Ca(ICC2/PI489777)SNP_37831 | 76   | A | G | 8  | 4  | --        | -- |
|            | Ca(ICC2/PI489777)SNP_37832 | 408  | A | T | 20 | 12 | --        | -- |
| CakTC18326 | Ca(ICC2/PI489777)SNP_37833 | 535  | C | A | 3  | 4  | --        | -- |
|            | Ca(ICC2/PI489777)SNP_37834 | 856  | C | T | 4  | 7  | --        | -- |
|            | Ca(ICC2/PI489777)SNP_37835 | 859  | T | C | 4  | 7  | --        | -- |
|            | Ca(ICC2/PI489777)SNP_37836 | 988  | C | A | 3  | 9  | --        | -- |
| CakTC42898 | Ca(ICC2/PI489777)SNP_37837 | 455  | G | A | 52 | 21 | --        | -- |
|            | Ca(ICC2/PI489777)SNP_37838 | 461  | G | A | 51 | 21 | --        | -- |
|            | Ca(ICC2/PI489777)SNP_37839 | 665  | C | T | 5  | 7  | --        | -- |
|            | Ca(ICC2/PI489777)SNP_37840 | 738  | A | G | 5  | 4  | --        | -- |
|            | Ca(ICC2/PI489777)SNP_37841 | 744  | G | A | 5  | 4  | --        | -- |
| CakTC29466 | Ca(ICC2/PI489777)SNP_37842 | 394  | G | C | 15 | 10 | --        | -- |
|            | Ca(ICC2/PI489777)SNP_37843 | 899  | A | C | 19 | 8  | --        | -- |
| CakTC37315 | Ca(ICC2/PI489777)SNP_37844 | 121  | C | G | 50 | 12 | --        | -- |
|            | Ca(ICC2/PI489777)SNP_37845 | 196  | C | A | 68 | 13 | --        | -- |
|            | Ca(ICC2/PI489777)SNP_37846 | 412  | G | T | 68 | 22 | --        | -- |
|            | Ca(ICC2/PI489777)SNP_37847 | 447  | G | T | 48 | 21 | --        | -- |
|            | Ca(ICC2/PI489777)SNP_37848 | 724  | C | T | 57 | 24 | --        | -- |
|            | Ca(ICC2/PI489777)SNP_37849 | 745  | T | C | 53 | 21 | --        | -- |
|            | Ca(ICC2/PI489777)SNP_37850 | 763  | A | C | 53 | 19 | --        | -- |
|            | Ca(ICC2/PI489777)SNP_37851 | 833  | A | G | 46 | 17 | --        | -- |
|            | Ca(ICC2/PI489777)SNP_37852 | 859  | C | T | 45 | 15 | --        | -- |
| CakTC29205 | Ca(ICC2/PI489777)SNP_37853 | 420  | A | G | 13 | 3  | --        | -- |
| CakTC30042 | Ca(ICC2/PI489777)SNP_37854 | 1052 | C | A | 4  | 4  | --        | -- |
| CakTC43108 | Ca(ICC2/PI489777)SNP_37855 | 164  | G | A | 33 | 25 | --        | -- |
|            | Ca(ICC2/PI489777)SNP_37856 | 391  | C | T | 29 | 23 | --        | -- |
|            | Ca(ICC2/PI489777)SNP_37857 | 442  | C | T | 38 | 37 | --        | -- |
|            | Ca(ICC2/PI489777)SNP_37858 | 624  | C | T | 9  | 18 | --        | -- |
| CakTC35205 | Ca(ICC2/PI489777)SNP_37859 | 988  | C | A | 23 | 13 | --        | -- |
|            | Ca(ICC2/PI489777)SNP_37860 | 2386 | A | G | 17 | 11 | --        | -- |
| CakTC38582 | Ca(ICC2/PI489777)SNP_37861 | 869  | A | C | 10 | 3  | --        | -- |
| CakTC27699 | Ca(ICC2/PI489777)SNP_37862 | 126  | A | G | 3  | 4  | --        | -- |
|            | Ca(ICC2/PI489777)SNP_37863 | 193  | C | T | 5  | 4  | --        | -- |
|            | Ca(ICC2/PI489777)SNP_37864 | 225  | C | T | 10 | 4  | --        | -- |
|            | Ca(ICC2/PI489777)SNP_37865 | 557  | G | A | 15 | 8  | --        | -- |
|            | Ca(ICC2/PI489777)SNP_37866 | 1223 | A | G | 7  | 7  | --        | -- |
|            | Ca(ICC2/PI489777)SNP_37867 | 1238 | C | T | 5  | 6  | --        | -- |
|            | Ca(ICC2/PI489777)SNP_37868 | 1239 | A | G | 5  | 6  | --        | -- |
|            | Ca(ICC2/PI489777)SNP_37869 | 1397 | C | T | 5  | 10 | --        | -- |
|            | Ca(ICC2/PI489777)SNP_37870 | 1411 | A | G | 3  | 10 | --        | -- |
|            | Ca(ICC2/PI489777)SNP_37871 | 1466 | A | C | 7  | 10 | --        | -- |
|            | Ca(ICC2/PI489777)SNP_37872 | 1605 | A | G | 6  | 7  | --        | -- |
|            | Ca(ICC2/PI489777)SNP_37873 | 1673 | A | G | 7  | 4  | --        | -- |
|            | Ca(ICC2/PI489777)SNP_37874 | 1751 | T | C | 7  | 4  | --        | -- |
|            | Ca(ICC2/PI489777)SNP_37875 | 2570 | C | T | 3  | 7  | --        | -- |
|            | Ca(ICC2/PI489777)SNP_37876 | 2601 | A | G | 3  | 5  | --        | -- |
|            | Ca(ICC2/PI489777)SNP_37877 | 2609 | G | A | 4  | 5  | --        | -- |
| CakTC13498 | Ca(ICC2/PI489777)SNP_37878 | 696  | A | T | 11 | 6  | --        | -- |
|            | Ca(ICC2/PI489777)SNP_37879 | 759  | T | C | 14 | 12 | --        | -- |
|            | Ca(ICC2/PI489777)SNP_37880 | 1601 | G | A | 15 | 19 | --        | -- |
|            | Ca(ICC2/PI489777)SNP_37881 | 1626 | T | C | 17 | 19 | --        | -- |
|            | Ca(ICC2/PI489777)SNP_37882 | 1698 | A | G | 19 | 12 | --        | -- |
|            | Ca(ICC2/PI489777)SNP_37883 | 2262 | T | C | 18 | 18 | --        | -- |



|            |                            |      |   |   |    |    |        |      |
|------------|----------------------------|------|---|---|----|----|--------|------|
|            | Ca(ICC2/PI489777)SNP_37884 | 2425 | T | C | 13 | 14 | --     | --   |
| CakTC09073 | Ca(ICC2/PI489777)SNP_37885 | 501  | G | T | 3  | 3  | --     | --   |
|            | Ca(ICC2/PI489777)SNP_37886 | 541  | A | G | 3  | 4  | --     | --   |
| CakTC34322 | Ca(ICC2/PI489777)SNP_37887 | 232  | A | G | 6  | 5  | Root   | --   |
|            | Ca(ICC2/PI489777)SNP_37888 | 241  | G | T | 6  | 5  | Root   | --   |
| CakTC32602 | Ca(ICC2/PI489777)SNP_37889 | 154  | A | C | 20 | 9  | --     | --   |
|            | Ca(ICC2/PI489777)SNP_37890 | 245  | C | A | 20 | 11 | --     | --   |
|            | Ca(ICC2/PI489777)SNP_37891 | 252  | G | A | 22 | 11 | --     | --   |
|            | Ca(ICC2/PI489777)SNP_37892 | 283  | C | G | 21 | 12 | --     | --   |
| CakTC32344 | Ca(ICC2/PI489777)SNP_37893 | 346  | T | C | 31 | 6  | --     | --   |
|            | Ca(ICC2/PI489777)SNP_37894 | 713  | C | T | 51 | 6  | --     | --   |
|            | Ca(ICC2/PI489777)SNP_37895 | 882  | T | C | 22 | 7  | --     | --   |
|            | Ca(ICC2/PI489777)SNP_37896 | 927  | C | T | 32 | 7  | --     | --   |
|            | Ca(ICC2/PI489777)SNP_37897 | 1297 | T | C | 42 | 4  | --     | --   |
|            | Ca(ICC2/PI489777)SNP_37898 | 1482 | G | C | 24 | 3  | --     | --   |
| CakTC29443 | Ca(ICC2/PI489777)SNP_37899 | 1224 | T | A | 3  | 3  | --     | SNF2 |
|            | Ca(ICC2/PI489777)SNP_37900 | 4504 | T | C | 3  | 5  | --     | SNF2 |
|            | Ca(ICC2/PI489777)SNP_37901 | 4582 | T | C | 7  | 4  | --     | SNF2 |
|            | Ca(ICC2/PI489777)SNP_37902 | 4642 | A | C | 6  | 3  | --     | SNF2 |
|            | Ca(ICC2/PI489777)SNP_37903 | 5176 | T | A | 10 | 4  | --     | SNF2 |
|            | Ca(ICC2/PI489777)SNP_37904 | 6152 | C | A | 5  | 3  | --     | SNF2 |
|            | Ca(ICC2/PI489777)SNP_37905 | 6172 | T | G | 3  | 3  | --     | SNF2 |
|            | Ca(ICC2/PI489777)SNP_37906 | 6415 | G | C | 8  | 4  | --     | SNF2 |
|            | Ca(ICC2/PI489777)SNP_37907 | 6478 | C | T | 9  | 8  | --     | SNF2 |
| CakTC35883 | Ca(ICC2/PI489777)SNP_37908 | 417  | A | C | 14 | 5  | --     | --   |
|            | Ca(ICC2/PI489777)SNP_37909 | 951  | T | C | 32 | 15 | --     | --   |
|            | Ca(ICC2/PI489777)SNP_37910 | 1104 | G | A | 28 | 11 | --     | --   |
|            | Ca(ICC2/PI489777)SNP_37911 | 2309 | A | G | 33 | 5  | --     | --   |
| CakTC36403 | Ca(ICC2/PI489777)SNP_37912 | 86   | G | T | 3  | 11 | --     | --   |
|            | Ca(ICC2/PI489777)SNP_37913 | 251  | C | G | 7  | 22 | --     | --   |
| CakTC31782 | Ca(ICC2/PI489777)SNP_37914 | 357  | T | G | 5  | 3  | --     | EIL  |
|            | Ca(ICC2/PI489777)SNP_37915 | 586  | G | A | 11 | 3  | --     | EIL  |
|            | Ca(ICC2/PI489777)SNP_37916 | 1213 | G | C | 25 | 10 | --     | EIL  |
|            | Ca(ICC2/PI489777)SNP_37917 | 1406 | C | A | 27 | 10 | --     | EIL  |
|            | Ca(ICC2/PI489777)SNP_37918 | 1420 | C | T | 20 | 9  | --     | EIL  |
|            | Ca(ICC2/PI489777)SNP_37919 | 1893 | A | G | 35 | 13 | --     | EIL  |
|            | Ca(ICC2/PI489777)SNP_37920 | 1901 | C | G | 34 | 12 | --     | EIL  |
| CakTC36058 | Ca(ICC2/PI489777)SNP_37921 | 256  | G | C | 17 | 7  | --     | --   |
|            | Ca(ICC2/PI489777)SNP_37922 | 362  | C | A | 17 | 6  | --     | --   |
|            | Ca(ICC2/PI489777)SNP_37923 | 412  | T | C | 20 | 10 | --     | --   |
|            | Ca(ICC2/PI489777)SNP_37924 | 532  | A | G | 11 | 8  | --     | --   |
|            | Ca(ICC2/PI489777)SNP_37925 | 679  | C | T | 17 | 12 | --     | --   |
|            | Ca(ICC2/PI489777)SNP_37926 | 1753 | T | C | 13 | 8  | --     | --   |
|            | Ca(ICC2/PI489777)SNP_37927 | 1786 | T | C | 12 | 8  | --     | --   |
| CakTC26128 | Ca(ICC2/PI489777)SNP_37928 | 133  | G | T | 8  | 16 | Flower | bud  |
|            | Ca(ICC2/PI489777)SNP_37929 | 299  | A | G | 34 | 25 | Flower | bud  |
| CakTC34301 | Ca(ICC2/PI489777)SNP_37930 | 219  | G | A | 10 | 6  | --     | --   |
|            | Ca(ICC2/PI489777)SNP_37931 | 302  | A | G | 9  | 6  | --     | --   |
|            | Ca(ICC2/PI489777)SNP_37932 | 389  | C | A | 9  | 7  | --     | --   |
| CakTC28470 | Ca(ICC2/PI489777)SNP_37933 | 674  | C | T | 4  | 3  | --     | --   |
| CakTC38671 | Ca(ICC2/PI489777)SNP_37934 | 411  | G | A | 21 | 19 | --     | --   |
|            | Ca(ICC2/PI489777)SNP_37935 | 693  | G | A | 20 | 34 | --     | --   |
| CakTC25329 | Ca(ICC2/PI489777)SNP_37936 | 866  | T | C | 9  | 4  | --     | TCP  |
|            | Ca(ICC2/PI489777)SNP_37937 | 961  | T | C | 15 | 5  | --     | TCP  |
| CakTC39274 | Ca(ICC2/PI489777)SNP_37938 | 432  | C | T | 11 | 3  | --     | --   |
|            | Ca(ICC2/PI489777)SNP_37939 | 609  | A | C | 16 | 4  | --     | --   |
|            | Ca(ICC2/PI489777)SNP_37940 | 853  | C | T | 13 | 7  | --     | --   |
|            | Ca(ICC2/PI489777)SNP_37941 | 1069 | A | G | 11 | 7  | --     | --   |
|            | Ca(ICC2/PI489777)SNP_37942 | 1144 | C | T | 9  | 9  | --     | --   |
|            | Ca(ICC2/PI489777)SNP_37943 | 1320 | C | G | 11 | 10 | --     | --   |
|            | Ca(ICC2/PI489777)SNP_37944 | 1529 | T | C | 8  | 6  | --     | --   |
|            | Ca(ICC2/PI489777)SNP_37945 | 1597 | G | A | 6  | 4  | --     | --   |
| CakTC09563 | Ca(ICC2/PI489777)SNP_37946 | 206  | T | C | 3  | 4  | --     | --   |
|            | Ca(ICC2/PI489777)SNP_37947 | 224  | G | A | 3  | 5  | --     | --   |
|            | Ca(ICC2/PI489777)SNP_37948 | 353  | T | A | 4  | 3  | --     | --   |
|            | Ca(ICC2/PI489777)SNP_37949 | 422  | G | A | 6  | 3  | --     | --   |
|            | Ca(ICC2/PI489777)SNP_37950 | 818  | A | G | 10 | 7  | --     | --   |
|            | Ca(ICC2/PI489777)SNP_37951 | 1025 | T | C | 7  | 9  | --     | --   |
|            | Ca(ICC2/PI489777)SNP_37952 | 1535 | G | A | 5  | 3  | --     | --   |
|            | Ca(ICC2/PI489777)SNP_37953 | 1541 | G | A | 6  | 3  | --     | --   |
|            | Ca(ICC2/PI489777)SNP_37954 | 3097 | T | G | 5  | 8  | --     | --   |
