# Supplementary material
Source: publisher figshare collection journal article supplement (https://plos.figshare.com/articles/dataset/_/115291)
Supplement: Supplementary file 1 [file 1 › Table_S12.pdf]

**Table S12.** List of selected SSRs validated for polymorphism in chickpea genotypes.

| SSR ID          | Transcript ID | SSR repeat motif | Kabuli repeat unit size | Desi repeat unit size | Wild repeat unit size | Primer sequence (5'-3')                                | Annealing temperature (°C) | Product size (bp) | A/NA <sup>1</sup> in at least two genotypes | M/P <sup>2</sup> SSR in Kabuli/desi | M/P <sup>2</sup> SSR in Kabuli/wild |
|-----------------|---------------|------------------|-------------------------|-----------------------|-----------------------|--------------------------------------------------------|----------------------------|-------------------|---------------------------------------------|-------------------------------------|-------------------------------------|
| CakTpSSR00428   | CakTC09678    | TCAC             | 9                       | 7                     | 6                     | F- AGGGTTTGTGAAATTGCGAA<br>R- GACTGAGAAGGAGCGGTGAC     | 60.0                       | 168               | A                                           | M                                   | P                                   |
| CakTpSSR03117*# | CakTC34751    | AT               | 10                      | 12                    | 7                     | F- CCAACCAATGAAAGCTAGGC<br>R- TCCTATACCAATCCCCACA      | 60.0                       | 134               | A                                           | P                                   | P                                   |
| CakTpSSR01214   | CakTC22634    | TA               | 11                      | 12                    | 8                     | F- CGAAGCATACCAGGTTGATG<br>R- GGGATCTTGTTTCACGCTGT     | 60.1                       | 121               | A                                           | M                                   | P                                   |
| CakTpSSR01352   | CakTC23616    | CT               | 9                       | 8                     | 6                     | F- ATTCGGTCGTATCGTCTTGG<br>R- GCGTGTGAGCGGTGAAAAGA     | 60.1                       | 279               | A                                           | M                                   | M                                   |
| CakTpSSR01506   | CakTC24680    | AT               | 7                       | 8                     | -                     | F- TTTCTGCCCCAATCCAATA<br>R- ATTGGTCCCCAATGTCTTGA      | 60.2                       | 226               | A                                           | P                                   | M                                   |
| CakTpSSR03923   | CakTC39799    | GAA              | 19                      | 18                    | 15                    | F- ACAGAGAGGGAGGTTCTGCA<br>R- CCCTTCTTCCATGTACCACC     | 59.3                       | 279               | A                                           | M                                   | P                                   |
| CakTpSSR01486   | CakTC24535    | TGGA             | 8                       | 7                     | 6                     | F- ATCCACCTCCTTTTGCTTT<br>R- CCTCAGTCTAGGTGGGCAGA      | 60.4                       | 275               | A                                           | M                                   | M                                   |
| CakTpSSR04389   | CakTC42648    | AG               | 6                       | 7                     | 8                     | F- AGAGTCAAATTAACAAAGCATAGA<br>R- AAAATGCCCACAAGAGCAAG | 60.2                       | 122               | A                                           | P                                   | P                                   |
| CakTpSSR02813   | CakTC32488    | CTT              | 8                       | 9                     | 7                     | F- ATCACAACGTGGTGGTAGCC<br>R- TCTTCTTCTCTGGGGATCA      | 59.7                       | 265               | A                                           | M                                   | P                                   |
| CakTpSSR01394   | CakTC23803    | TGA              | 15                      | 14                    | 6                     | F- CGAGGATCTCTGGGAAATGA<br>R- AAGCGTGCTGCTTCAGAAAT     | 60.2                       | 236               | A                                           | M                                   | P                                   |
| CakTpSSR02497   | CakTC30675    | AT               | 7                       | 10                    | 6                     | F- TCCATTCCAACCTTAACCACA<br>R- GGAATGGAAGAAGAGAAGGGA   | 59.6                       | 152               | A                                           | P                                   | M                                   |
| CakTpSSR02142   | CakTC28476    | TA               | 6                       | 7                     | -                     | F- GGAATGGAAGAAGAGAAGGGA<br>R- TGACCTCTTGTCTACTCAT     | 59.0                       | 153               | A                                           | M                                   | P                                   |
| CakTpSSR03532   | CakTC37598    | TTG              | 6                       | 5                     | 7                     | F- TCACCATCGTGTGATGGACT<br>R- TTGTTGGGTCTCTTTTGTTTT    | 59.9                       | 220               | A                                           | P                                   | P                                   |
| CakTpSSR03684   | CakTC38539    | TC               | 7                       | 8                     | -                     | F- CCCAGAAAAGAGAAAACGCA<br>R- ATTTCTCAACTGTCTCGCCG     | 60.4                       | 269               | A                                           | M                                   | P                                   |
| CakTpSSR00219   | CakTC05322    | CAT              | 5                       | 7                     | 7                     | F- CATTATCAGCAGATACGGACT<br>R- GATTCTGCTGGAAGTGAAGAT   | 55.2                       | 148               | A                                           | M                                   | M                                   |
| CakTpSSR00867*# | CakTC15258    | GA               | 14                      | 16                    | 16                    | F- AGTCAATCCGTAAAGAAGAGC<br>R- ATAGCGAAAAACAATGAAACA   | 55.3                       | 160               | A                                           | P                                   | P                                   |
| CakTpSSR01928   | CakTC27222    | CT               | 13                      | 12                    | 12                    | F- GGTTTCATGGCTAAAAATCTTC<br>R- TTTGCATTACAAAAGCTCCTA  | 55.5                       | 149               | A                                           | M                                   | M                                   |
| CakTpSSR02222   | CakTC29000    | TTC              | 10                      | 5                     | 5                     | F- CACCAATTGTAAACGAATCAAC<br>R- AGAGGTTGAAAAATGGAAGAG  | 55.1                       | 149               | A                                           | M                                   | P                                   |
| CakTpSSR02719   | CakTC32010    | CAG              | 5                       | 6                     | 6                     | F- ATCAACAGCATTCTCAACAAC<br>R- CACATGTCCAATACCACCTAT   | 55.0                       | 155               | A                                           | P                                   | P                                   |
| CakTpSSR02637*# | CakTC31492    | GATA             | 7                       | 8                     | 8                     | F- AGTTAGTGGTGTGCTGAAGAA<br>R- ACATTGTAGGGGTAGGTTAGC   | 55.0                       | 142               | A                                           | P                                   | P                                   |
| CakTpSSR03815   | CakTC39206    | CT               | 7                       | 6                     | 6                     | F- GCCCTTGAGTTGAGTTAAGAC<br>R- AAACATATGGAATGGAAGGTT   | 55.0                       | 147               | A                                           | M                                   | P                                   |
| CakTpSSR04076   | CakTC40711    | CCA              | 5                       | 6                     | 6                     | F- AATATGCCTATGAGCATCTGA<br>R- TTGAAGGTGTTAAATTGGTTG   | 55.1                       | 148               | A                                           | P                                   | M                                   |
| CakTpSSR01542*# | CakTC24891    | AAT              | 11                      | 13                    | -                     | F- CCTTGCTCTTCTTCACTTCT<br>R- AGCTAAAAAGGTGAATTCGTT    | 53.8                       | 165               | A                                           | P                                   | P                                   |
| CakTpSSR01660   | CakTC25584    | AG               | 6                       | 13                    | -                     | F- TTGTTAATCAAGTTGGTTGCT<br>R- CCATCCCATACCAATAACATA   | 53.6                       | 132               | A                                           | M                                   | M                                   |

|                  |            |        |    |    |   |                                                       |      |     |   |   |   |
|------------------|------------|--------|----|----|---|-------------------------------------------------------|------|-----|---|---|---|
| CakTpSSR03317    | CakTC36179 | GA     | 19 | 24 | - | F- GGTGATTGAGATTGGAGAT<br>R- ATATGATCTATCCTCGCCAGT    | 54.2 | 155 | A | P | P |
| CakTpSSR03090*#  | CakTC34556 | ATTCAT | 7  | 6  | - | F- AACTCACCTTTTCTTCAAA<br>R- AGGATAAAGGTGAAGCAAATC    | 53.8 | 148 | A | P | P |
| CakTpSSR03637*## | CakTC38143 | TCC    | 12 | 8  | 9 | F- AAAGTTGTTGTTGAGCGTTT<br>R- CAAAGTTCACCTCTCGTTGATT  | 53.7 | 167 | A | P | P |
| CakTpSSR02074    | CakTC28116 | GTG    | 8  | 6  | - | F- GTTGAGAAATTGAGGAGTGTG<br>R- TAACCACCACAATTTCTTTC   | 53.4 | 156 | A | P | P |
| CakTpSSR03639*## | CakTC38187 | GA     | 14 | 11 | - | F- CCAAAGTAAACCATGATGAG<br>R- CACCACACTTCTTTCTTTC     | 53.9 | 169 | A | P | P |
| CakTpSSR00752*## | CakTC13120 | AGA    | 6  | 8  | - | F- AATAAAGGAGGATTTGATGG<br>R- CTTGTTCTGCTACTTCCATTG   | 53.6 | 159 | A | P | P |
| CakTpSSR01488*## | CakTC24545 | AG     | 9  | 6  | - | F- CGAAAGAGAAAAGAGAGTGTGA<br>R- GTAAATGAAATTCGGGTTACG | 54.3 | 152 | A | P | P |
| CakTpSSR03485#   | CakTC37408 | AAG    | 13 | 5  | 5 | F- CATTTTAAATCTCGATTTCACC<br>R- ATTCTCCGATTAAATCTTCCA | 54   | 129 | A | P | P |
| CakTpSSR04265#   | CakTC41944 | TAA    | 17 | 14 | - | F- CAAGATCTTAATCTTTCTTTCC<br>R- TAGGTCAAGAGCTGAAAGTGA | 53.8 | 147 | A | P | P |
| CakTpSSR01720    | CakTC25855 | TAA    | 11 | 9  | 8 | F- AAGCATACATGAAAGAAAACC<br>R- AGTTTATAAGTTGACGCGATG  | 52.9 | 120 | A | P | P |
| CakTpSSR02499*#  | CakTC30698 | ATG    | 7  | 5  | - | F- AAAAAGCAACAAGAAACACAG<br>R- CAACCATAGCAAAATTGAGAG  | 53.7 | 157 | A | P | M |
| CakTpSSR03521*#  | CakTC37545 | GA     | 17 | 22 | - | F- GAATGGTAATGTGAATTGGAA<br>R- GGTATATTTATGCAGCGTTTG  | 53.7 | 141 | A | P | P |
| CakTpSSR03891    | CakTC39656 | TTC    | 17 | 21 | 7 | F- TTAATGTTTGTGTGAGGTG<br>R- GTTGAATCCCTCTTTCCTT      | 53.5 | 119 | A | P | P |
| CakTpSSR03970    | CakTC40146 | TGA    | 9  | 12 | - | F- GAGTTGTGGTTGGTAGTTTGA<br>R- CTCACTTCTCATCACCATCAT  | 55   | 157 | A | P | M |
| CakTpSSR04045    | CakTC40557 | TC     | 12 | 11 | 7 | F- TTCTACTTCTCGATGGAACA<br>R- AAAGGTAGGTAGCTAGCAAGG   | 53.5 | 147 | A | M | M |
| Cak TpSSR2543#   | CakTC30946 | TAT    | 8  | 16 | - | F- GGGAAGTTACGGTTAGAT<br>R- CCACCATTTTCATTTTCAT       | 53.6 | 164 | A | P | P |

\*12 SSRs shown in Figure 6A.

#14 SSRs validated for polymorphic potential in 21 kabuli and desi genotypes

‡5 SSRs validated for polymorphic potential in 21 kabuli and desi genotypes shown in Figure 6B.
