# Supplementary material
Source: publisher figshare collection journal article supplement (https://plos.figshare.com/articles/dataset/_/115291)
Supplement: Supplementary file 1 [file 1 › Table_S13.pdf]

**Table S13.** List of 22 selected SNPs between kabuli and desi validated using the allele-specific PCR.

| <i>Kabuli</i><br>transcript<br>sequence IDS | SNP IDs                   | Position (bp)<br>of SNP loci<br>on <i>Kabuli</i><br>transcripts | SNPs<br>between<br><i>Kabuli</i> and<br><i>desi</i> | SNP-flanking primers (5'-3')                            | SNP allele specific primers (5'-3') | Traget<br>SNP loci | Annealing<br>temperature<br>(°C) | Product<br>size (bp) | SNPs<br>Validated<br>(V)/Not<br>Validated<br>(NV) |
|---------------------------------------------|---------------------------|-----------------------------------------------------------------|-----------------------------------------------------|---------------------------------------------------------|-------------------------------------|--------------------|----------------------------------|----------------------|---------------------------------------------------|
| CakTC11127                                  | Ca(ICC2/ICC4958)SNP_00049 | 318                                                             | (C/T)                                               | F- CCGTTGTAATCGGAGGTGTT<br>R- TCAAAAGACGTCGGTGAGG       | CCAGTAAAGAAAACCCTAACACATT           | T                  | 59.8                             | 148                  | NV                                                |
| CakTC30832*                                 | Ca(ICC2/ICC4958)SNP_00060 | 1610                                                            | (T/G)                                               | F- TCAACTCAACCTCCTTGTCAAA<br>R- TGAAGGCACCGACTCTTACA    | CACAAATCTCTCTCAATATCCTTCC           | G                  | 58.4                             | 166                  | V                                                 |
| CakTC34113*                                 | Ca(ICC2/ICC4958)SNP_00062 | 867                                                             | (G/A)                                               | F- TAGACGATTGGCCAAAATCC<br>R- TCTCGCCTAGCAATTCAATG      | ATTATTTTCTCTCATCTCCTCCGAA           | A                  | 59.0                             | 170                  | V                                                 |
| CakTC38380                                  | Ca(ICC2/ICC4958)SNP_00107 | 1009                                                            | (T/C)                                               | F- TCTGAGTCTGAACCTGAGCTTG<br>R- CTCTCAATTGGCACCACAA     | TGAGTCTGAACCTGAGCTTGATT             | T                  | 58.7                             | 147                  | NV                                                |
| CakTC29297                                  | Ca(ICC2/ICC4958)SNP_00203 | 200                                                             | (C/G)                                               | F- GGCCCTCATTAAAGGACTTT<br>R- GACCAGCTCACGTTTCTGA       | GGGATTCTCTCTCCCAACG                 | G                  | 59.0                             | 154                  | V                                                 |
| CakTC30888*                                 | Ca(ICC2/ICC4958)SNP_00316 | 1470                                                            | (C/T)                                               | F- TGCCTCACCATTGACTAGC<br>R- AAAGATTTTCGGCAGGAAT        | CAGCAAGTTTTCCCTAGAAGGT              | T                  | 57.9                             | 171                  | V                                                 |
| CakTC23861                                  | Ca(ICC2/ICC4958)SNP_00371 | 376                                                             | (A/C)                                               | F- CACCAGCCATGCTCACTTT<br>R- TGACCAAGACAATGCTCCAC       | TGGTGGCCATCCCACTAA                  | A                  | 59.7                             | 134                  | NV                                                |
| CakTC29356*                                 | Ca(ICC2/ICC4958)SNP_00374 | 287                                                             | (T/C)                                               | F- CCATCACTTGCACCTCTAAG<br>R- TGGAAATTGGTCATAGTAAAAATGC | CATTGTAGCATTCCACATGAGT              | T                  | 59.3                             | 159                  | V                                                 |
| CakTC33643*                                 | Ca(ICC2/ICC4958)SNP_00428 | 2996                                                            | (T/G)                                               | F- AGGTGGTGACTGGAAGAGGA<br>R- TCAAGCTTCCTGTGTGAGA       | GTCAAATGCCTAAGTCTGGATG              | G                  | 56.9                             | 168                  | V                                                 |
| CakTC43107*                                 | Ca(ICC2/ICC4958)SNP_00637 | 1386                                                            | (A/G)                                               | F- CACAATAGGGTGTGTGTGG<br>R- TTCTTCAAGTGGAACAACCAA      | TTCAAGTGGAAACAACCAACAC              | G                  | 58.6                             | 154                  | V                                                 |
| CakTC10926*                                 | Ca(ICC2/ICC4958)SNP_00649 | 883                                                             | (G/A)                                               | F- CAGCAACAACCTATTCTGC<br>R- TCGACCAGCTGAGAGAATTG       | CAACAACCTATTCTGCCTAATA              | A                  | 59.1                             | 155                  | V                                                 |
| CakTC36652*                                 | Ca(ICC2/ICC4958)SNP_00830 | 2548                                                            | (A/G)                                               | F- GCATCCATCCCAATCTCAAT<br>R- TGTGTGTGTGTGTGCTGCTG      | CATCATCTACAGCAGCAGCAA               | A                  | 58.5                             | 150                  | V                                                 |
| CakTC10919                                  | Ca(ICC2/ICC4958)SNP_00936 | 149                                                             | (C/G)                                               | F- AAGACATGCCGTGAACGAT<br>R- GGATGATTTTTGGGGTGAGA       | CGGAGCTTATGAATGGAACC                | G                  | 59.7                             | 130                  | NV                                                |
| CakTC30819                                  | Ca(ICC2/ICC4958)SNP_00948 | 184                                                             | (T/C)                                               | F- GAAATGGAAGCAGAGCATGA<br>R- TGTGCATCTGAACAAGGTGA      | GATTCTTTATGTGAAAGTTATGACC           | C                  | 58.8                             | 151                  | V                                                 |
| CakTC40460*                                 | Ca(ICC2/ICC4958)SNP_01291 | 2458                                                            | (G/T)                                               | F- TGTCTCTCATCGTCGTCGTC<br>R- CAAGTAAACCTCGCGGAAG       | TTCTTGTCTTGTCTTCTAGCTGTG            | G                  | 59.9                             | 142                  | V                                                 |
| CakTC40874                                  | Ca(ICC2/ICC4958)SNP_01379 | 447                                                             | (C/T)                                               | F- ACCGCCGTCGATAGTAAAGA<br>R- CCAAAGGGACTCTGAGGAGA      | GATAGTAAAGAAGATGATGGGACCT           | T                  | 57.4                             | 164                  | V                                                 |
| CakTC31552                                  | Ca(ICC2/ICC4958)SNP_01427 | 754                                                             | (C/T)                                               | F- GGTGGTGGTGAGGTTGAGTT<br>R- AACCAACCGAGTCATTGAACC     | CGGCCGCCTTCAGAT                     | T                  | 59.8                             | 153                  | V                                                 |
| CakTC39741                                  | Ca(ICC2/ICC4958)SNP_01729 | 457                                                             | (A/G)                                               | F- TTCATGGGATTAGGGGGTA<br>R- GGAAGTGGTGATTCAATTGGAA     | TGATTCAATTGGAAGAATTAACCAC           | G                  | 55.0                             | 162                  | V                                                 |
| CakTC39748*                                 | Ca(ICC2/ICC4958)SNP_01832 | 1221                                                            | (A/G)                                               | F- CGATGGGTGAATGACACAG<br>R- TCTTCGCCAACTCATTTC         | GTGGGCCAGACACCAGAG                  | G                  | 58.4                             | 149                  | V                                                 |
| CakTC34197                                  | Ca(ICC2/ICC4958)SNP_01876 | 863                                                             | (A/G)                                               | F- AGTTCGAGTCAAGGATGGT<br>R- TGGAACTGCACCTTCATCAC       | CACAGTATGGATTTGGTGAGAAG             | G                  | 59.7                             | 152                  | NV                                                |
| CakTC38606*                                 | Ca(ICC2/ICC4958)SNP_01935 | 490                                                             | (C/G)                                               | F- TGTGGAGTTTTCTGCACCTG<br>R- GACCAGAAAGCCCAACTGTC      | CACCTGGCAATGGCTACAG                 | G                  | 57.7                             | 144                  | V                                                 |
| CakTC42135*                                 | Ca(ICC2/ICC4958)SNP_01956 | 325                                                             | (C/T)                                               | F- CCTCACCTAGCTTTGGCAAT<br>R- GCGTTGTTGTTGTTGTTCT       | TTGTTGGTCTGTTTCGTATGATTA            | T                  | 58.7                             | 152                  | V                                                 |

\*12 SNPs shown in Figure 6C.
